# Supplementary material for: Research on Fusing Multisatellite Soil Moisture Data Based on Bayesian Model Averaging
Source: Hindawi journal article supplement (doi:10.1155/2018/9310838), 2018-06-25
Supplement: f1 [file 9310838.f1.zip › 2012_sm00-10cm_daily_ZDB_ZHY_50639_366days_allin.txt]

50639     50639     neimenggu      122.7300       48.0000           48       211     2012      01        01        001              0.000000   -9999.000000       0.000000   -9999.000000   -9999.000000   -9999.000000       0.039600   -9999.000000
50639     50639     neimenggu      122.7300       48.0000           48       211     2012      01        02        002              0.044417     -13.048981       0.000000       0.095340   -9999.000000   -9999.000000   -9999.000000       0.048000
50639     50639     neimenggu      122.7300       48.0000           48       211     2012      01        03        003              0.000000     -12.838867       0.000000       0.095462   -9999.000000   -9999.000000       0.040700       0.102000
50639     50639     neimenggu      122.7300       48.0000           48       211     2012      01        04        004              0.044958     -12.391357       0.000000       0.095585   -9999.000000   -9999.000000       0.041600       0.107000
50639     50639     neimenggu      122.7300       48.0000           48       211     2012      01        05        005              0.045083     -12.402252       0.000000       0.095711   -9999.000000   -9999.000000       0.047200       0.171000
50639     50639     neimenggu      122.7300       48.0000           48       211     2012      01        06        006              0.045125     -12.411682       0.000000       0.095836   -9999.000000   -9999.000000       0.041700       0.071000
50639     50639     neimenggu      122.7300       48.0000           48       211     2012      01        07        007              0.044917     -12.421234       0.000000       0.095959   -9999.000000   -9999.000000       0.043200   -9999.000000
50639     50639     neimenggu      122.7300       48.0000           48       211     2012      01        08        008              0.000000     -12.820831       0.000000       0.096079   -9999.000000   -9999.000000   -9999.000000       0.069000
50639     50639     neimenggu      122.7300       48.0000           48       211     2012      01        09        009              0.044708     -13.166077       0.000000       0.096196   -9999.000000   -9999.000000       0.038500       0.091000
50639     50639     neimenggu      122.7300       48.0000           48       211     2012      01        10        010              0.043667     -14.190887       0.000000       0.096311   -9999.000000   -9999.000000   -9999.000000       0.129000
50639     50639     neimenggu      122.7300       48.0000           48       211     2012      01        11        011              0.043083     -15.182251       0.000000       0.096423   -9999.000000   -9999.000000       0.034800       0.061000
50639     50639     neimenggu      122.7300       48.0000           48       211     2012      01        12        012              0.042792     -15.930542       0.000000       0.096513   -9999.000000   -9999.000000       0.033300       0.070000
50639     50639     neimenggu      122.7300       48.0000           48       211     2012      01        13        013              0.043208     -16.046661       0.000000       0.096533   -9999.000000   -9999.000000       0.035600       0.117000
50639     50639     neimenggu      122.7300       48.0000           48       211     2012      01        14        014              0.043000     -15.753815       0.000000       0.096650   -9999.000000   -9999.000000   -9999.000000       0.134000
50639     50639     neimenggu      122.7300       48.0000           48       211     2012      01        15        015              0.043958     -15.304443       0.000000       0.096773   -9999.000000   -9999.000000       0.043700       0.112000
50639     50639     neimenggu      122.7300       48.0000           48       211     2012      01        16        016              0.043750     -15.217438       0.000000       0.096901   -9999.000000   -9999.000000       0.034000       0.081000
50639     50639     neimenggu      122.7300       48.0000           48       211     2012      01        17        017              0.000000     -15.411316       0.000000       0.097032   -9999.000000   -9999.000000       0.035500       0.069000
50639     50639     neimenggu      122.7300       48.0000           48       211     2012      01        18        018              0.044083     -15.678009       0.000000       0.097159   -9999.000000   -9999.000000       0.035500       0.053000
50639     50639     neimenggu      122.7300       48.0000           48       211     2012      01        19        019              0.043792     -15.378387       0.000000       0.097244   -9999.000000   -9999.000000   -9999.000000       0.155000
50639     50639     neimenggu      122.7300       48.0000           48       211     2012      01        20        020              0.043333     -15.655151       0.000000       0.097347   -9999.000000   -9999.000000       0.034600       0.143000
50639     50639     neimenggu      122.7300       48.0000           48       211     2012      01        21        021              0.042458     -16.292725       0.000000       0.097234   -9999.000000   -9999.000000       0.037600       0.079000
50639     50639     neimenggu      122.7300       48.0000           48       211     2012      01        22        022              0.042333     -17.309906       0.000000       0.096868   -9999.000000   -9999.000000       0.036500       0.109000
50639     50639     neimenggu      122.7300       48.0000           48       211     2012      01        23        023              0.041958     -17.590698       0.000000       0.096702   -9999.000000   -9999.000000       0.043600       0.149000
50639     50639     neimenggu      122.7300       48.0000           48       211     2012      01        24        024              0.041417     -18.118027       0.000000       0.096249   -9999.000000   -9999.000000       0.033900       0.149000
50639     50639     neimenggu      122.7300       48.0000           48       211     2012      01        25        025              0.041167     -18.492996       0.000000       0.095853   -9999.000000   -9999.000000   -9999.000000       0.102000
50639     50639     neimenggu      122.7300       48.0000           48       211     2012      01        26        026              0.041583     -18.681870       0.000000       0.095082   -9999.000000   -9999.000000       0.041600       0.107000
50639     50639     neimenggu      122.7300       48.0000           48       211     2012      01        27        027              0.041333     -17.922882       0.000000       0.095257   -9999.000000   -9999.000000       0.044400       0.151000
50639     50639     neimenggu      122.7300       48.0000           48       211     2012      01        28        028              0.040500     -18.712677       0.000000       0.095115   -9999.000000   -9999.000000       0.039800       0.164000
50639     50639     neimenggu      122.7300       48.0000           48       211     2012      01        29        029              0.040000     -20.267609       0.000000       0.094676   -9999.000000   -9999.000000       0.038600       0.209000
50639     50639     neimenggu      122.7300       48.0000           48       211     2012      01        30        030              0.040125     -20.472672       0.000000       0.093597   -9999.000000   -9999.000000       0.040300       0.117000
50639     50639     neimenggu      122.7300       48.0000           48       211     2012      01        31        031              0.040417     -20.369705       0.000000       0.093756   -9999.000000   -9999.000000       0.040300       0.092000
50639     50639     neimenggu      122.7300       48.0000           48       211     2012      02        01        032              0.040833     -19.765198       0.000000       0.093896   -9999.000000   -9999.000000   -9999.000000       0.104000
50639     50639     neimenggu      122.7300       48.0000           48       211     2012      02        02        033              0.042375     -18.825012       0.000000       0.094105   -9999.000000   -9999.000000       0.033700       0.143000
50639     50639     neimenggu      122.7300       48.0000           48       211     2012      02        03        034              0.042708     -15.928070       0.000000       0.094628   -9999.000000   -9999.000000       0.036300       0.183000
50639     50639     neimenggu      122.7300       48.0000           48       211     2012      02        04        035              0.043042     -15.327118       0.000000       0.094832   -9999.000000   -9999.000000       0.041300       0.094000
50639     50639     neimenggu      122.7300       48.0000           48       211     2012      02        05        036              0.044625     -13.548126       0.000000       0.095144   -9999.000000   -9999.000000   -9999.000000   -9999.000000
50639     50639     neimenggu      122.7300       48.0000           48       211     2012      02        06        037              0.043583     -12.270996       0.000000       0.095531   -9999.000000   -9999.000000       0.042800       0.071000
50639     50639     neimenggu      122.7300       48.0000           48       211     2012      02        07        038              0.042500     -14.565033       0.000000       0.095243   -9999.000000   -9999.000000       0.042200       0.180000
50639     50639     neimenggu      122.7300       48.0000           48       211     2012      02        08        039              0.042833     -16.098816       0.000000       0.094724   -9999.000000   -9999.000000       0.038200       0.163000
50639     50639     neimenggu      122.7300       48.0000           48       211     2012      02        09        040              0.042792     -15.184265       0.000000       0.094940   -9999.000000   -9999.000000       0.044800       0.106000
50639     50639     neimenggu      122.7300       48.0000           48       211     2012      02        10        041              0.043042     -15.684052       0.000000       0.094789   -9999.000000   -9999.000000       0.042500       0.087000
50639     50639     neimenggu      122.7300       48.0000           48       211     2012      02        11        042              0.042542     -15.712677       0.000000       0.094707   -9999.000000   -9999.000000   -9999.000000       0.150000
50639     50639     neimenggu      122.7300       48.0000           48       211     2012      02        12        043              0.042583     -16.923950       0.000000       0.094407   -9999.000000   -9999.000000       0.044300       0.062000
50639     50639     neimenggu      122.7300       48.0000           48       211     2012      02        13        044              0.043917     -16.397064       0.000000       0.094168   -9999.000000   -9999.000000       0.048300       0.174000
50639     50639     neimenggu      122.7300       48.0000           48       211     2012      02        14        045              0.044042     -14.251678       0.000000       0.094813   -9999.000000   -9999.000000       0.047300       0.067000
50639     50639     neimenggu      122.7300       48.0000           48       211     2012      02        15        046              0.043792     -14.588623       0.000000       0.094936   -9999.000000   -9999.000000       0.040700       0.192000
50639     50639     neimenggu      122.7300       48.0000           48       211     2012      02        16        047              0.043875     -14.184784       0.000000       0.094736   -9999.000000   -9999.000000       0.045600       0.126000
50639     50639     neimenggu      122.7300       48.0000           48       211     2012      02        17        048              0.044417     -14.926361       0.000000       0.094577   -9999.000000   -9999.000000       0.048700       0.153000
50639     50639     neimenggu      122.7300       48.0000           48       211     2012      02        18        049              0.046042     -13.809570       0.000000       0.094818   -9999.000000   -9999.000000   -9999.000000       0.147000
50639     50639     neimenggu      122.7300       48.0000           48       211     2012      02        19        050              0.046083     -11.220276       0.000000       0.095563   -9999.000000   -9999.000000       0.040600       0.084000
50639     50639     neimenggu      122.7300       48.0000           48       211     2012      02        20        051              0.044458     -11.657104       0.000000       0.095199   -9999.000000   -9999.000000       0.046500       0.050000
50639     50639     neimenggu      122.7300       48.0000           48       211     2012      02        21        052              0.045292     -14.716522       0.000000       0.094418   -9999.000000   -9999.000000       0.044300       0.137000
50639     50639     neimenggu      122.7300       48.0000           48       211     2012      02        22        053              0.046000     -13.448944       0.000000       0.094387   -9999.000000   -9999.000000   -9999.000000       0.176000
50639     50639     neimenggu      122.7300       48.0000           48       211     2012      02        23        054              0.046667     -11.855835       0.000000       0.094812   -9999.000000   -9999.000000       0.049600       0.164000
50639     50639     neimenggu      122.7300       48.0000           48       211     2012      02        24        055              0.048167      -9.935303       0.000000       0.095566   -9999.000000   -9999.000000       0.050500       0.075000
50639     50639     neimenggu      122.7300       48.0000           48       211     2012      02        25        056              0.047083      -9.279480       0.000000       0.095769   -9999.000000   -9999.000000       0.049300       0.175000
50639     50639     neimenggu      122.7300       48.0000           48       211     2012      02        26        057              0.046667     -11.335114       0.000000       0.095053   -9999.000000   -9999.000000       0.049100       0.115000
50639     50639     neimenggu      122.7300       48.0000           48       211     2012      02        27        058              0.046750     -12.477051       0.000000       0.094286   -9999.000000   -9999.000000       0.041800       0.190000
50639     50639     neimenggu      122.7300       48.0000           48       211     2012      02        28        059              0.051875      -9.162964       0.000000       0.095162   -9999.000000   -9999.000000   -9999.000000       0.112000
50639     50639     neimenggu      122.7300       48.0000           48       211     2012      02        29        060              0.000000   -9999.000000       0.000000   -9999.000000   -9999.000000   -9999.000000   -9999.000000   -9999.000000
50639     50639     neimenggu      122.7300       48.0000           48       211     2012      03        01        061              0.050292      -6.183563       0.000000       0.100728   -9999.000000   -9999.000000       0.039600       0.164000
50639     50639     neimenggu      122.7300       48.0000           48       211     2012      03        02        062              0.049792      -9.201935       0.000000       0.096477   -9999.000000   -9999.000000       0.042700       0.126000
50639     50639     neimenggu      122.7300       48.0000           48       211     2012      03        03        063              0.050083      -9.865875       0.000000       0.095228   -9999.000000   -9999.000000       0.049600       0.198000
50639     50639     neimenggu      122.7300       48.0000           48       211     2012      03        04        064              0.051667      -8.756958       0.000000       0.095430   -9999.000000   -9999.000000   -9999.000000       0.152000
50639     50639     neimenggu      122.7300       48.0000           48       211     2012      03        05        065              0.051792      -6.656769       0.000000       0.103720   -9999.000000   -9999.000000       0.059900   -9999.000000
50639     50639     neimenggu      122.7300       48.0000           48       211     2012      03        06        066              0.053042      -6.593628       0.000000       0.105437   -9999.000000   -9999.000000       0.064200       0.137000
50639     50639     neimenggu      122.7300       48.0000           48       211     2012      03        07        067              0.000000      -6.314484       0.000000       0.108655   -9999.000000   -9999.000000       0.057300       0.208000
50639     50639     neimenggu      122.7300       48.0000           48       211     2012      03        08        068              0.054250      -5.596161       0.000000       0.106756   -9999.000000   -9999.000000       0.056300       0.175000
50639     50639     neimenggu      122.7300       48.0000           48       211     2012      03        09        069              0.055250      -6.875183       0.000000       0.104514   -9999.000000   -9999.000000       0.051700       0.145000
50639     50639     neimenggu      122.7300       48.0000           48       211     2012      03        10        070              0.053583      -6.842621       0.000000       0.102676   -9999.000000   -9999.000000   -9999.000000       0.123000
50639     50639     neimenggu      122.7300       48.0000           48       211     2012      03        11        071              0.053958      -7.826569       0.000000       0.099489   -9999.000000   -9999.000000       0.053000       0.116000
50639     50639     neimenggu      122.7300       48.0000           48       211     2012      03        12        072              0.059292      -7.082855       0.000000       0.100461   -9999.000000   -9999.000000       0.060200       0.223000
50639     50639     neimenggu      122.7300       48.0000           48       211     2012      03        13        073              0.058042      -5.848297       0.000000       0.111561   -9999.000000   -9999.000000       0.055600       0.163000
50639     50639     neimenggu      122.7300       48.0000           48       211     2012      03        14        074              0.060652      -4.636261       0.000000       0.121927   -9999.000000   -9999.000000       0.058300       0.187000
50639     50639     neimenggu      122.7300       48.0000           48       211     2012      03        15        075              0.063625      -4.005859       0.000000       0.133132   -9999.000000   -9999.000000       0.054800       0.386000
50639     50639     neimenggu      122.7300       48.0000           48       211     2012      03        16        076              0.083750      -0.592163       0.000000       0.168204   -9999.000000   -9999.000000   -9999.000000       0.300000
50639     50639     neimenggu      122.7300       48.0000           48       211     2012      03        17        077              0.059167      -1.194214       0.000000       0.188013   -9999.000000   -9999.000000       0.057700       0.188000
50639     50639     neimenggu      122.7300       48.0000           48       211     2012      03        18        078              0.059458      -8.131561       0.000000       0.105107   -9999.000000   -9999.000000       0.066300       0.116000
50639     50639     neimenggu      122.7300       48.0000           48       211     2012      03        19        079              0.059250      -5.074768       0.000000       0.120414   -9999.000000   -9999.000000       0.059600       0.159000
50639     50639     neimenggu      122.7300       48.0000           48       211     2012      03        20        080              0.069087      -4.620300       0.000000       0.124514   -9999.000000   -9999.000000       0.066900       0.309000
50639     50639     neimenggu      122.7300       48.0000           48       211     2012      03        21        081              0.079083      -1.643646       0.000000       0.154539   -9999.000000   -9999.000000   -9999.000000       0.310000
50639     50639     neimenggu      122.7300       48.0000           48       211     2012      03        22        082              0.085000       0.307953       0.000000       0.188789   -9999.000000   -9999.000000       0.073100       0.383000
50639     50639     neimenggu      122.7300       48.0000           48       211     2012      03        23        083              0.086458       1.035736       0.000000       0.202155   -9999.000000   -9999.000000       0.069700       0.261000
50639     50639     neimenggu      122.7300       48.0000           48       211     2012      03        24        084              0.092917       0.910065       0.000000       0.202095   -9999.000000   -9999.000000       0.068100       0.303000
50639     50639     neimenggu      122.7300       48.0000           48       211     2012      03        25        085              0.000000       0.003113       0.000000       0.194331   -9999.000000   -9999.000000       0.063800       0.328000
50639     50639     neimenggu      122.7300       48.0000           48       211     2012      03        26        086              0.098667       0.390839       0.000000       0.188921       0.109000   -9999.000000       0.069100       0.411000
50639     50639     neimenggu      122.7300       48.0000           48       211     2012      03        27        087              0.107833       2.549011       0.000000       0.240422   -9999.000000   -9999.000000   -9999.000000       0.402000
50639     50639     neimenggu      122.7300       48.0000           48       211     2012      03        28        088              0.123667       3.525146       0.000000       0.239833       0.140000   -9999.000000       0.075600       0.354000
50639     50639     neimenggu      122.7300       48.0000           48       211     2012      03        29        089              0.122375       5.542145       0.000000       0.265685   -9999.000000   -9999.000000       0.071700       0.367000
50639     50639     neimenggu      122.7300       48.0000           48       211     2012      03        30        090              0.122667       1.120178       0.399312       0.216617   -9999.000000   -9999.000000       0.067100       0.273000
50639     50639     neimenggu      122.7300       48.0000           48       211     2012      03        31        091              0.098125      -0.121643       0.758516       0.194896   -9999.000000   -9999.000000       0.061600       0.161000
50639     50639     neimenggu      122.7300       48.0000           48       211     2012      04        01        092              0.085000      -2.445801       0.000000       0.155858   -9999.000000   -9999.000000       0.064900       0.256000
50639     50639     neimenggu      122.7300       48.0000           48       211     2012      04        02        093              0.089750      -2.011963       0.000000       0.156678   -9999.000000   -9999.000000   -9999.000000       0.339000
50639     50639     neimenggu      122.7300       48.0000           48       211     2012      04        03        094              0.102292      -0.430237       0.000000       0.180273       0.155000       0.009200       0.080100   -9999.000000
50639     50639     neimenggu      122.7300       48.0000           48       211     2012      04        04        095              0.104083       1.483826       0.000000       0.210652   -9999.000000   -9999.000000       0.064000       0.294000
50639     50639     neimenggu      122.7300       48.0000           48       211     2012      04        05        096              0.092542       0.960999       0.000000       0.209234   -9999.000000   -9999.000000       0.062600       0.275000
50639     50639     neimenggu      122.7300       48.0000           48       211     2012      04        06        097              0.099208      -1.175537       0.000000       0.174254   -9999.000000   -9999.000000       0.070000       0.343000
50639     50639     neimenggu      122.7300       48.0000           48       211     2012      04        07        098              0.114375       0.902405       0.000000       0.198196       0.145000   -9999.000000   -9999.000000       0.373000
50639     50639     neimenggu      122.7300       48.0000           48       211     2012      04        08        099              0.118167       3.289886       0.344542       0.245539   -9999.000000       0.090100       0.083500       0.452000
50639     50639     neimenggu      122.7300       48.0000           48       211     2012      04        09        100              0.126917       2.763672       0.000000       0.253058       0.152000   -9999.000000       0.083300       0.482000
50639     50639     neimenggu      122.7300       48.0000           48       211     2012      04        10        101              0.120125       6.193176       0.538336       0.269711       0.141000   -9999.000000       0.070200       0.410000
50639     50639     neimenggu      122.7300       48.0000           48       211     2012      04        11        102              0.125000       4.273987       1.779143       0.246049       0.131000       0.037000       0.069300       0.416000
50639     50639     neimenggu      122.7300       48.0000           48       211     2012      04        12        103              0.134958       4.601929       0.000000       0.272602   -9999.000000   -9999.000000       0.078900       0.417000
50639     50639     neimenggu      122.7300       48.0000           48       211     2012      04        13        104              0.134500       5.877106       0.000000       0.278135       0.163000   -9999.000000   -9999.000000       0.497000
50639     50639     neimenggu      122.7300       48.0000           48       211     2012      04        14        105              0.132625       6.490143       0.000000       0.256869       0.150000   -9999.000000       0.075300       0.481000
50639     50639     neimenggu      122.7300       48.0000           48       211     2012      04        15        106              0.129583       5.724548       0.000000       0.269456       0.148000   -9999.000000       0.073700       0.439000
50639     50639     neimenggu      122.7300       48.0000           48       211     2012      04        16        107              0.134750       4.610535       0.000000       0.245727       0.135000       0.015100       0.071500       0.387000
50639     50639     neimenggu      122.7300       48.0000           48       211     2012      04        17        108              0.134667       6.163269       0.000000       0.268429   -9999.000000   -9999.000000   -9999.000000       0.488000
50639     50639     neimenggu      122.7300       48.0000           48       211     2012      04        18        109              0.135042       9.966583       0.000000       0.270780       0.141500       0.023100       0.081100       0.525000
50639     50639     neimenggu      122.7300       48.0000           48       211     2012      04        19        110              0.133375      12.300629       0.000000       0.268721       0.148000       0.052500   -9999.000000       0.469000
50639     50639     neimenggu      122.7300       48.0000           48       211     2012      04        20        111              0.130583      14.312378       0.161787       0.267219       0.142500   -9999.000000   -9999.000000       0.492000
50639     50639     neimenggu      122.7300       48.0000           48       211     2012      04        21        112              0.127500      10.636902       1.645102       0.264062       0.132500       0.099100       0.076800       0.378000
50639     50639     neimenggu      122.7300       48.0000           48       211     2012      04        22        113              0.135000      11.638245       0.000000       0.273830       0.127000   -9999.000000       0.074100       0.497000
50639     50639     neimenggu      122.7300       48.0000           48       211     2012      04        23        114              0.134292      14.220825       2.601880       0.267396       0.133500   -9999.000000       0.082600       0.473000
50639     50639     neimenggu      122.7300       48.0000           48       211     2012      04        24        115              0.126042      14.345551       0.000000       0.271571       0.139000       0.069900   -9999.000000       0.458000
50639     50639     neimenggu      122.7300       48.0000           48       211     2012      04        25        116              0.000000      11.533325       0.000000       0.271949       0.139000   -9999.000000       0.073900       0.466000
50639     50639     neimenggu      122.7300       48.0000           48       211     2012      04        26        117              0.123542       8.413727       0.000000       0.267132       0.107000       0.048000       0.070100       0.323000
50639     50639     neimenggu      122.7300       48.0000           48       211     2012      04        27        118              0.143417       7.197235       5.971802       0.261738   -9999.000000   -9999.000000       0.106600       0.465000
50639     50639     neimenggu      122.7300       48.0000           48       211     2012      04        28        119              0.177750       5.198517       0.000000       0.290365   -9999.000000   -9999.000000       0.087500       0.699000
50639     50639     neimenggu      122.7300       48.0000           48       211     2012      04        29        120              0.171625       6.636017       0.336035       0.282357       0.148000       0.287100       0.084300       0.544000
50639     50639     neimenggu      122.7300       48.0000           48       211     2012      04        30        121              0.166583       9.350464       0.824316       0.277808       0.138000   -9999.000000   -9999.000000       0.608000
50639     50639     neimenggu      122.7300       48.0000           48       211     2012      05        01        122              0.165500      10.643524       0.000000       0.278920       0.159500       0.239100       0.081400       0.517000
50639     50639     neimenggu      122.7300       48.0000           48       211     2012      05        02        123              0.161458      11.730957       1.456635       0.274211       0.142500       0.284800       0.086400   -9999.000000
50639     50639     neimenggu      122.7300       48.0000           48       211     2012      05        03        124              0.159333      13.411530       0.000000       0.271007       0.143000   -9999.000000       0.077300       0.530000
50639     50639     neimenggu      122.7300       48.0000           48       211     2012      05        04        125              0.151208      14.378418       1.572032       0.266528       0.146500       0.157300       0.081300       0.590000
50639     50639     neimenggu      122.7300       48.0000           48       211     2012      05        05        126              0.145125      12.795319       0.000000       0.273215       0.151000   -9999.000000       0.081700       0.593000
50639     50639     neimenggu      122.7300       48.0000           48       211     2012      05        06        127              0.139000      13.584045       0.000000       0.266041       0.146500       0.116100   -9999.000000       0.563000
50639     50639     neimenggu      122.7300       48.0000           48       211     2012      05        07        128              0.136125      13.245514       1.331489       0.264509   -9999.000000       0.102800       0.063300       0.592000
50639     50639     neimenggu      122.7300       48.0000           48       211     2012      05        08        129              0.132125      14.250153       0.000000       0.264312       0.135000   -9999.000000       0.060600       0.503000
50639     50639     neimenggu      122.7300       48.0000           48       211     2012      05        09        130              0.127750      14.488983       1.566312       0.263012       0.141500       0.132700       0.075800       0.563000
50639     50639     neimenggu      122.7300       48.0000           48       211     2012      05        10        131              0.125333      15.134552       0.947900       0.263797       0.152000   -9999.000000       0.066600       0.533000
50639     50639     neimenggu      122.7300       48.0000           48       211     2012      05        11        132              0.126250      14.278290       0.023855       0.267693       0.221000       0.092200   -9999.000000       0.539000
50639     50639     neimenggu      122.7300       48.0000           48       211     2012      05        12        133              0.149375      15.290924       9.377785       0.263402       0.232000       0.089500       0.096900       0.543000
50639     50639     neimenggu      122.7300       48.0000           48       211     2012      05        13        134              0.162083      11.371521       3.526693       0.294782       0.299000   -9999.000000       0.087400       0.859000
50639     50639     neimenggu      122.7300       48.0000           48       211     2012      05        14        135              0.158708      12.509064       0.342444       0.284059   -9999.000000       0.268400       0.115700       0.583000
50639     50639     neimenggu      122.7300       48.0000           48       211     2012      05        15        136              0.155042      11.801117       2.766911       0.279953       0.245000   -9999.000000       0.124400       0.710000
50639     50639     neimenggu      122.7300       48.0000           48       211     2012      05        16        137              0.155542       9.924103       0.159262       0.286692       0.276000   -9999.000000       0.108000       0.696000
50639     50639     neimenggu      122.7300       48.0000           48       211     2012      05        17        138              0.159958      11.505798       7.303046       0.283327       0.223500       0.145600   -9999.000000       0.730000
50639     50639     neimenggu      122.7300       48.0000           48       211     2012      05        18        139              0.158250      16.578918       2.877089       0.274554       0.203500   -9999.000000       0.098300       0.639000
50639     50639     neimenggu      122.7300       48.0000           48       211     2012      05        19        140              0.154167      18.367737       0.000000       0.269449       0.205000       0.142200       0.093100       0.605000
50639     50639     neimenggu      122.7300       48.0000           48       211     2012      05        20        141              0.151750      16.361176       0.000000       0.262285       0.212000   -9999.000000       0.092400       0.498000
50639     50639     neimenggu      122.7300       48.0000           48       211     2012      05        21        142              0.149750      17.307983       0.000000       0.259384       0.489000   -9999.000000       0.097200       0.663000
50639     50639     neimenggu      122.7300       48.0000           48       211     2012      05        22        143              0.147333      20.246033       2.549957       0.254510       0.489000       0.098800       0.102900       0.782000
50639     50639     neimenggu      122.7300       48.0000           48       211     2012      05        23        144              0.146792      15.188812       0.147025       0.270694   -9999.000000   -9999.000000       0.102500       0.520000
50639     50639     neimenggu      122.7300       48.0000           48       211     2012      05        24        145              0.145250      14.074066       0.540127       0.261373   -9999.000000       0.069100       0.105200       0.558000
50639     50639     neimenggu      122.7300       48.0000           48       211     2012      05        25        146              0.000000      14.520111       0.717413       0.259037       0.489000       0.082100       0.097000       0.523000
50639     50639     neimenggu      122.7300       48.0000           48       211     2012      05        26        147              0.145250      15.344330       0.000000       0.259736       0.487000   -9999.000000       0.093200       0.606000
50639     50639     neimenggu      122.7300       48.0000           48       211     2012      05        27        148              0.142667      16.676056       1.244874       0.257688       0.462000       0.154500       0.101300       0.520000
50639     50639     neimenggu      122.7300       48.0000           48       211     2012      05        28        149              0.138000      17.194244       0.000000       0.254742       0.482500   -9999.000000   -9999.000000       0.560000
50639     50639     neimenggu      122.7300       48.0000           48       211     2012      05        29        150              0.134667      17.795013       0.779658       0.251880   -9999.000000       0.132100       0.092700       0.571000
50639     50639     neimenggu      122.7300       48.0000           48       211     2012      05        30        151              0.141875      17.795135       3.778215       0.253022       0.489000       0.175800       0.142600   -9999.000000
50639     50639     neimenggu      122.7300       48.0000           48       211     2012      05        31        152              0.142875      14.860535       1.602952       0.274242       0.490000   -9999.000000       0.128300   -9999.000000
50639     50639     neimenggu      122.7300       48.0000           48       211     2012      06        01        153              0.168292      14.937347       6.147493       0.274118   -9999.000000       0.286200       0.114900       0.873000
50639     50639     neimenggu      122.7300       48.0000           48       211     2012      06        02        154              0.169250      16.300415       0.622890       0.290525   -9999.000000   -9999.000000       0.124800       0.671000
50639     50639     neimenggu      122.7300       48.0000           48       211     2012      06        03        155              0.162375      17.030090       0.562972       0.279362   -9999.000000   -9999.000000   -9999.000000       0.652000
50639     50639     neimenggu      122.7300       48.0000           48       211     2012      06        04        156              0.159750      17.028625       0.994736       0.275362   -9999.000000       0.204300       0.154200       0.590000
50639     50639     neimenggu      122.7300       48.0000           48       211     2012      06        05        157              0.158875      17.839783       0.044116       0.274300   -9999.000000   -9999.000000       0.143300       0.645000
50639     50639     neimenggu      122.7300       48.0000           48       211     2012      06        06        158              0.154208      18.668335       2.507663       0.268088   -9999.000000       0.042700       0.150500       0.784000
50639     50639     neimenggu      122.7300       48.0000           48       211     2012      06        07        159              0.152958      17.732117       0.711818       0.274347   -9999.000000       0.115500       0.166400       0.675000
50639     50639     neimenggu      122.7300       48.0000           48       211     2012      06        08        160              0.151417      18.037720       0.641272       0.272629   -9999.000000   -9999.000000   -9999.000000       0.649000
50639     50639     neimenggu      122.7300       48.0000           48       211     2012      06        09        161              0.180333      18.579071      11.709152       0.266503   -9999.000000       0.161300       0.188600       0.638000
50639     50639     neimenggu      122.7300       48.0000           48       211     2012      06        10        162              0.180917      16.686859       0.000000       0.301029   -9999.000000   -9999.000000       0.129300       0.739000
50639     50639     neimenggu      122.7300       48.0000           48       211     2012      06        11        163              0.000000      16.855164      10.055918       0.285803   -9999.000000       0.185400       0.163100       0.860000
50639     50639     neimenggu      122.7300       48.0000           48       211     2012      06        12        164              0.233500      14.337891      22.387457       0.303978   -9999.000000       0.353400       0.143900       0.848000
50639     50639     neimenggu      122.7300       48.0000           48       211     2012      06        13        165              0.214875      14.336426       1.916671       0.331348   -9999.000000   -9999.000000       0.161300       0.867000
50639     50639     neimenggu      122.7300       48.0000           48       211     2012      06        14        166              0.199917      15.669342       1.919520       0.317175   -9999.000000       0.386900   -9999.000000       0.838000
50639     50639     neimenggu      122.7300       48.0000           48       211     2012      06        15        167              0.189958      16.859436       0.153729       0.307956   -9999.000000       0.147200       0.142400       0.861000
50639     50639     neimenggu      122.7300       48.0000           48       211     2012      06        16        168              0.187833      17.413757      10.169810       0.297850   -9999.000000       0.338300       0.172700       0.850000
50639     50639     neimenggu      122.7300       48.0000           48       211     2012      06        17        169              0.232208      16.969849       8.768112       0.313796   -9999.000000       0.373000       0.149000       0.889000
50639     50639     neimenggu      122.7300       48.0000           48       211     2012      06        18        170              0.207833      17.175537       0.000000       0.321657   -9999.000000   -9999.000000       0.223400       0.787000
50639     50639     neimenggu      122.7300       48.0000           48       211     2012      06        19        171              0.195750      19.610321       0.000000       0.301017   -9999.000000       0.279300       0.173300       0.812000
50639     50639     neimenggu      122.7300       48.0000           48       211     2012      06        20        172              0.189167      20.936310       1.116166       0.291234   -9999.000000       0.192100   -9999.000000       0.762000
50639     50639     neimenggu      122.7300       48.0000           48       211     2012      06        21        173              0.180167      21.951630       0.000000       0.284425   -9999.000000   -9999.000000       0.143900       0.708000
50639     50639     neimenggu      122.7300       48.0000           48       211     2012      06        22        174              0.170417      22.083679       0.000000       0.278583   -9999.000000       0.182500       0.141000       0.683000
50639     50639     neimenggu      122.7300       48.0000           48       211     2012      06        23        175              0.158625      22.038086       0.000000       0.273121   -9999.000000   -9999.000000       0.148000       0.608000
50639     50639     neimenggu      122.7300       48.0000           48       211     2012      06        24        176              0.149083      22.249695       4.196786       0.268110   -9999.000000   -9999.000000       0.173500       0.778000
50639     50639     neimenggu      122.7300       48.0000           48       211     2012      06        25        177              0.200083      21.420349       9.270650       0.276646   -9999.000000       0.166700   -9999.000000       1.000000
50639     50639     neimenggu      122.7300       48.0000           48       211     2012      06        26        178              0.221292      20.900055      14.112772       0.306395   -9999.000000   -9999.000000       0.126600       0.895000
50639     50639     neimenggu      122.7300       48.0000           48       211     2012      06        27        179              0.226917      21.986847       0.000000       0.311279   -9999.000000       0.418600       0.129700       0.878000
50639     50639     neimenggu      122.7300       48.0000           48       211     2012      06        28        180              0.210583      20.888367      12.814098       0.303522   -9999.000000   -9999.000000       0.135300       0.962000
50639     50639     neimenggu      122.7300       48.0000           48       211     2012      06        29        181              0.246125      21.055359      34.124577       0.315837   -9999.000000       0.449300       0.132900   -9999.000000
50639     50639     neimenggu      122.7300       48.0000           48       211     2012      06        30        182              0.215042      19.199371      10.956637       0.348191   -9999.000000       0.090900       0.130300   -9999.000000
50639     50639     neimenggu      122.7300       48.0000           48       211     2012      07        01        183              0.222917      21.072052      14.396338       0.330770   -9999.000000   -9999.000000   -9999.000000       0.935000
50639     50639     neimenggu      122.7300       48.0000           48       211     2012      07        02        184              0.240542      18.585358       5.818417       0.329744   -9999.000000       0.574200       0.242800       0.992000
50639     50639     neimenggu      122.7300       48.0000           48       211     2012      07        03        185              0.224000      18.318024       1.118945       0.328625   -9999.000000       0.137800       0.217400       1.000000
50639     50639     neimenggu      122.7300       48.0000           48       211     2012      07        04        186              0.206333      19.157227       0.167639       0.312109   -9999.000000       0.098500       0.196700       0.935000
50639     50639     neimenggu      122.7300       48.0000           48       211     2012      07        05        187              0.194083      20.903809       0.000000       0.301183   -9999.000000       0.393800       0.181500       0.870000
50639     50639     neimenggu      122.7300       48.0000           48       211     2012      07        06        188              0.182667      22.404633       0.000000       0.292282   -9999.000000   -9999.000000       0.178000       0.830000
50639     50639     neimenggu      122.7300       48.0000           48       211     2012      07        07        189              0.170125      23.574524       0.000000       0.285413   -9999.000000       0.223900   -9999.000000       0.743000
50639     50639     neimenggu      122.7300       48.0000           48       211     2012      07        08        190              0.209500      24.218201      23.066605       0.279495   -9999.000000   -9999.000000       0.174900       0.840000
50639     50639     neimenggu      122.7300       48.0000           48       211     2012      07        09        191              0.240583      22.953400      33.584015       0.328038   -9999.000000   -9999.000000       0.217900       0.951000
50639     50639     neimenggu      122.7300       48.0000           48       211     2012      07        10        192              0.234542      23.114319       0.187534       0.341000   -9999.000000       0.355100       0.198900       1.000000
50639     50639     neimenggu      122.7300       48.0000           48       211     2012      07        11        193              0.222750      23.228973       0.580723       0.320454   -9999.000000   -9999.000000       0.229300       0.889000
50639     50639     neimenggu      122.7300       48.0000           48       211     2012      07        12        194              0.203833      20.301270       0.000000       0.309565   -9999.000000       0.265000   -9999.000000       0.920000
50639     50639     neimenggu      122.7300       48.0000           48       211     2012      07        13        195              0.195208      20.393280       1.788173       0.300736   -9999.000000   -9999.000000       0.189700       0.921000
50639     50639     neimenggu      122.7300       48.0000           48       211     2012      07        14        196              0.190917      21.326538       1.370286       0.299223   -9999.000000   -9999.000000       0.184200       0.951000
50639     50639     neimenggu      122.7300       48.0000           48       211     2012      07        15        197              0.186000      22.320282       0.000000       0.294060   -9999.000000       0.201100       0.173800       0.832000
50639     50639     neimenggu      122.7300       48.0000           48       211     2012      07        16        198              0.180333      22.577057       0.000000       0.289897   -9999.000000   -9999.000000       0.208600       0.833000
50639     50639     neimenggu      122.7300       48.0000           48       211     2012      07        17        199              0.203500      23.033417       0.000000       0.284492   -9999.000000       0.147600       0.201600       0.740000
50639     50639     neimenggu      122.7300       48.0000           48       211     2012      07        18        200              0.192833      24.375732       0.111121       0.280075   -9999.000000       0.065600   -9999.000000       0.830000
50639     50639     neimenggu      122.7300       48.0000           48       211     2012      07        19        201              0.182708      23.260193       0.254966       0.277690   -9999.000000   -9999.000000       0.188800       0.797000
50639     50639     neimenggu      122.7300       48.0000           48       211     2012      07        20        202              0.217333      23.958405      19.253099       0.276272   -9999.000000       0.168700       0.208300       0.892000
50639     50639     neimenggu      122.7300       48.0000           48       211     2012      07        21        203              0.238750      23.450073      25.311901       0.302191   -9999.000000   -9999.000000       0.225200       1.000000
50639     50639     neimenggu      122.7300       48.0000           48       211     2012      07        22        204              0.238708      21.726196      18.058466       0.342146   -9999.000000       0.109300       0.232000       1.000000
50639     50639     neimenggu      122.7300       48.0000           48       211     2012      07        23        205              0.209250      19.077362       0.000000       0.342883   -9999.000000       0.151800       0.252100       0.955000
50639     50639     neimenggu      122.7300       48.0000           48       211     2012      07        24        206              0.219042      21.344818       9.049980       0.313237   -9999.000000   -9999.000000   -9999.000000       1.000000
50639     50639     neimenggu      122.7300       48.0000           48       211     2012      07        25        207              0.226167      20.301483      38.205772       0.321934   -9999.000000       0.439100       0.243500       0.921000
50639     50639     neimenggu      122.7300       48.0000           48       211     2012      07        26        208              0.233833      22.186859       2.918689       0.341024   -9999.000000   -9999.000000       0.227000       0.963000
50639     50639     neimenggu      122.7300       48.0000           48       211     2012      07        27        209              0.217125      20.215820       0.000000       0.331595   -9999.000000   -9999.000000       0.238100       1.000000
50639     50639     neimenggu      122.7300       48.0000           48       211     2012      07        28        210              0.229667      22.025543      18.258162       0.312702   -9999.000000       0.191000       0.234800   -9999.000000
50639     50639     neimenggu      122.7300       48.0000           48       211     2012      07        29        211              0.234375      21.078918       6.464530       0.330133   -9999.000000   -9999.000000   -9999.000000       0.909000
50639     50639     neimenggu      122.7300       48.0000           48       211     2012      07        30        212              0.227708      18.768616       0.000000       0.329121   -9999.000000       0.190600       0.232300       0.856000
50639     50639     neimenggu      122.7300       48.0000           48       211     2012      07        31        213              0.217292      19.176941       0.000000       0.316435   -9999.000000       0.398500       0.226900       0.857000
50639     50639     neimenggu      122.7300       48.0000           48       211     2012      08        01        214              0.207458      20.504791       0.000000       0.308942   -9999.000000   -9999.000000       0.211900       0.908000
50639     50639     neimenggu      122.7300       48.0000           48       211     2012      08        02        215              0.200042      20.844757       6.885250       0.305352   -9999.000000       0.175700       0.218800       0.827000
50639     50639     neimenggu      122.7300       48.0000           48       211     2012      08        03        216              0.197500      19.846069       0.000000       0.304428   -9999.000000   -9999.000000       0.217800       0.844000
50639     50639     neimenggu      122.7300       48.0000           48       211     2012      08        04        217              0.196292      19.905579       1.519949       0.303662   -9999.000000       0.156700   -9999.000000       0.862000
50639     50639     neimenggu      122.7300       48.0000           48       211     2012      08        05        218              0.192000      21.473999       0.065158       0.302443   -9999.000000       0.312900       0.208900       0.830000
50639     50639     neimenggu      122.7300       48.0000           48       211     2012      08        06        219              0.183667      23.097198       0.000000       0.299217   -9999.000000   -9999.000000       0.210500       0.881000
50639     50639     neimenggu      122.7300       48.0000           48       211     2012      08        07        220              0.174250      24.471222       0.913799       0.296790   -9999.000000       0.177600       0.206500       0.875000
50639     50639     neimenggu      122.7300       48.0000           48       211     2012      08        08        221              0.166208      24.227661       0.000000       0.295266   -9999.000000   -9999.000000       0.208600       0.753000
50639     50639     neimenggu      122.7300       48.0000           48       211     2012      08        09        222              0.160417      21.746307       0.319879       0.292898   -9999.000000       0.127000       0.210700       0.719000
50639     50639     neimenggu      122.7300       48.0000           48       211     2012      08        10        223              0.157583      19.446320       0.863128       0.291229   -9999.000000       0.128200       0.214900       0.681000
50639     50639     neimenggu      122.7300       48.0000           48       211     2012      08        11        224              0.156125      17.656464       0.000000       0.295374   -9999.000000   -9999.000000       0.195700       0.750000
50639     50639     neimenggu      122.7300       48.0000           48       211     2012      08        12        225              0.154708      17.754791       0.624448       0.291942   -9999.000000       0.340800       0.203500       0.855000
50639     50639     neimenggu      122.7300       48.0000           48       211     2012      08        13        226              0.152708      17.952057       0.000000       0.291528   -9999.000000   -9999.000000       0.199000       0.713000
50639     50639     neimenggu      122.7300       48.0000           48       211     2012      08        14        227              0.148667      18.998962       0.000000       0.288315   -9999.000000   -9999.000000       0.209700       0.745000
50639     50639     neimenggu      122.7300       48.0000           48       211     2012      08        15        228              0.146708      19.222321       0.000000       0.286131   -9999.000000       0.162500   -9999.000000       0.666000
50639     50639     neimenggu      122.7300       48.0000           48       211     2012      08        16        229              0.143500      18.949921       0.000000       0.283522   -9999.000000   -9999.000000       0.195600       0.764000
50639     50639     neimenggu      122.7300       48.0000           48       211     2012      08        17        230              0.159958      19.870850      34.951313       0.281509   -9999.000000   -9999.000000       0.180500       0.832000
50639     50639     neimenggu      122.7300       48.0000           48       211     2012      08        18        231              0.184458      20.034088       0.000000       0.356684   -9999.000000   -9999.000000       0.204300       0.763000
50639     50639     neimenggu      122.7300       48.0000           48       211     2012      08        19        232              0.177958      19.082367       0.000000       0.316195   -9999.000000   -9999.000000       0.210700       0.773000
50639     50639     neimenggu      122.7300       48.0000           48       211     2012      08        20        233              0.170292      18.859833       0.510991       0.303333   -9999.000000       0.049600       0.260600       0.769000
50639     50639     neimenggu      122.7300       48.0000           48       211     2012      08        21        234              0.164667      16.730988       0.000000       0.298997   -9999.000000   -9999.000000   -9999.000000       0.711000
50639     50639     neimenggu      122.7300       48.0000           48       211     2012      08        22        235              0.160500      16.109375       0.000000       0.294202   -9999.000000       0.128500       0.239900   -9999.000000
50639     50639     neimenggu      122.7300       48.0000           48       211     2012      08        23        236              0.156750      16.173309       0.000000       0.291529   -9999.000000       0.124600       0.263900       0.742000
50639     50639     neimenggu      122.7300       48.0000           48       211     2012      08        24        237              0.154667      16.942200       0.000000       0.289995   -9999.000000   -9999.000000       0.252100   -9999.000000
50639     50639     neimenggu      122.7300       48.0000           48       211     2012      08        25        238              0.000000      18.727631       2.746038       0.287039   -9999.000000   -9999.000000       0.254400   -9999.000000
50639     50639     neimenggu      122.7300       48.0000           48       211     2012      08        26        239              0.156500      19.527191       0.000000       0.291616   -9999.000000   -9999.000000   -9999.000000   -9999.000000
50639     50639     neimenggu      122.7300       48.0000           48       211     2012      08        27        240              0.155500      18.820160       0.000000       0.288001   -9999.000000       0.146900       0.249200       0.733000
50639     50639     neimenggu      122.7300       48.0000           48       211     2012      08        28        241              0.152708      20.112030       0.000000       0.284697   -9999.000000       0.148200       0.228900       0.730000
50639     50639     neimenggu      122.7300       48.0000           48       211     2012      08        29        242              0.146000      19.892242       0.000000       0.281381   -9999.000000   -9999.000000       0.230500       0.651000
50639     50639     neimenggu      122.7300       48.0000           48       211     2012      08        30        243              0.143333      17.696899       0.000000       0.278874   -9999.000000       0.156100       0.239200       0.709000
50639     50639     neimenggu      122.7300       48.0000           48       211     2012      08        31        244              0.142750      18.065094       0.000000       0.277596   -9999.000000   -9999.000000       0.255600       0.763000
50639     50639     neimenggu      122.7300       48.0000           48       211     2012      09        01        245              0.142667      20.465637       2.527211       0.276010   -9999.000000   -9999.000000   -9999.000000       0.711000
50639     50639     neimenggu      122.7300       48.0000           48       211     2012      09        02        246              0.222583      19.921021      29.987410       0.280740   -9999.000000       0.128900       0.264600       0.904000
50639     50639     neimenggu      122.7300       48.0000           48       211     2012      09        03        247              0.225417      14.352081       0.163166       0.338291   -9999.000000   -9999.000000       0.226600       0.827000
50639     50639     neimenggu      122.7300       48.0000           48       211     2012      09        04        248              0.220417      13.406555       2.738559       0.311658   -9999.000000       0.187400       0.198800       0.801000
50639     50639     neimenggu      122.7300       48.0000           48       211     2012      09        05        249              0.221167      13.531250       0.737468       0.307622   -9999.000000       0.181600       0.200700       0.839000
50639     50639     neimenggu      122.7300       48.0000           48       211     2012      09        06        250              0.211375      14.584259       0.000000       0.303280   -9999.000000   -9999.000000       0.215900       0.785000
50639     50639     neimenggu      122.7300       48.0000           48       211     2012      09        07        251              0.201500      15.597076       0.000000       0.296534   -9999.000000       0.228300   -9999.000000       0.712000
50639     50639     neimenggu      122.7300       48.0000           48       211     2012      09        08        252              0.193542      16.431396       0.158948       0.292091   -9999.000000   -9999.000000       0.218300       0.780000
50639     50639     neimenggu      122.7300       48.0000           48       211     2012      09        09        253              0.188500      17.231842       0.515900       0.288847   -9999.000000       0.170300       0.210200       0.788000
50639     50639     neimenggu      122.7300       48.0000           48       211     2012      09        10        254              0.182042      17.551178       5.771612       0.287088   -9999.000000       0.150100       0.204400       0.808000
50639     50639     neimenggu      122.7300       48.0000           48       211     2012      09        11        255              0.243042      16.848114      26.020264       0.294035       0.489000   -9999.000000       0.214300       0.927000
50639     50639     neimenggu      122.7300       48.0000           48       211     2012      09        12        256              0.240167      12.814636       2.329470       0.336225       0.489000       0.219100   -9999.000000       0.828000
50639     50639     neimenggu      122.7300       48.0000           48       211     2012      09        13        257              0.251792      11.614136       5.485801       0.320703       0.489000       0.410600       0.207400       0.841000
50639     50639     neimenggu      122.7300       48.0000           48       211     2012      09        14        258              0.231667      11.320099       0.000000       0.319451       0.489000       0.161800       0.221800       0.830000
50639     50639     neimenggu      122.7300       48.0000           48       211     2012      09        15        259              0.221250      13.351379       0.000000       0.306148   -9999.000000       0.167800       0.200300       0.876000
50639     50639     neimenggu      122.7300       48.0000           48       211     2012      09        16        260              0.214167      13.906189       0.000000       0.300683       0.489500   -9999.000000       0.203100       0.800000
50639     50639     neimenggu      122.7300       48.0000           48       211     2012      09        17        261              0.206917      14.734924       0.000000       0.297377       0.489500       0.190500       0.152600       0.731000
50639     50639     neimenggu      122.7300       48.0000           48       211     2012      09        18        262              0.199167      14.917267       0.000000       0.295221       0.489000       0.449500   -9999.000000       0.804000
50639     50639     neimenggu      122.7300       48.0000           48       211     2012      09        19        263              0.193542      14.752594       0.171891       0.293392       0.490000   -9999.000000       0.151300       0.757000
50639     50639     neimenggu      122.7300       48.0000           48       211     2012      09        20        264              0.189750      14.729095       0.174653       0.292806       0.489000       0.453800       0.154500       0.730000
50639     50639     neimenggu      122.7300       48.0000           48       211     2012      09        21        265              0.185708      14.401794       0.000000       0.291606   -9999.000000   -9999.000000       0.149200       0.696000
50639     50639     neimenggu      122.7300       48.0000           48       211     2012      09        22        266              0.181042      14.664062       0.000000       0.290756       0.214000       0.114700       0.148400       0.656000
50639     50639     neimenggu      122.7300       48.0000           48       211     2012      09        23        267              0.176792      13.734650       0.000000       0.290489       0.229000       0.248800       0.149500       0.659000
50639     50639     neimenggu      122.7300       48.0000           48       211     2012      09        24        268              0.173167      12.776062       0.614054       0.290160       0.227000   -9999.000000   -9999.000000   -9999.000000
50639     50639     neimenggu      122.7300       48.0000           48       211     2012      09        25        269              0.214208      12.873688      20.578348       0.290223   -9999.000000       0.285700       0.139700       0.872000
50639     50639     neimenggu      122.7300       48.0000           48       211     2012      09        26        270              0.216167      11.149689       0.000000       0.330570       0.256000   -9999.000000       0.131600       0.710000
50639     50639     neimenggu      122.7300       48.0000           48       211     2012      09        27        271              0.208071      11.259308       0.049193       0.309128       0.267500       0.237600       0.134400       0.733000
50639     50639     neimenggu      122.7300       48.0000           48       211     2012      09        28        272              0.199333       9.855957       0.000000       0.302825       0.246000   -9999.000000       0.145100       0.836000
50639     50639     neimenggu      122.7300       48.0000           48       211     2012      09        29        273              0.194583      10.477600       0.000000       0.298684   -9999.000000   -9999.000000   -9999.000000       0.759000
50639     50639     neimenggu      122.7300       48.0000           48       211     2012      09        30        274              0.189708      10.003510       0.000000       0.296489       0.251000   -9999.000000       0.143800       0.698000
50639     50639     neimenggu      122.7300       48.0000           48       211     2012      10        01        275              0.185708      10.468292       0.000000       0.295295       0.203000   -9999.000000       0.121400       0.712000
50639     50639     neimenggu      122.7300       48.0000           48       211     2012      10        02        276              0.181250      11.646271       0.000000       0.294183       0.202000       0.148600       0.105800       0.668000
50639     50639     neimenggu      122.7300       48.0000           48       211     2012      10        03        277              0.179417      11.119080       1.063897       0.293647       0.215000       0.229600       0.112300       0.653000
50639     50639     neimenggu      122.7300       48.0000           48       211     2012      10        04        278              0.188625      11.409149       3.834752       0.294737   -9999.000000   -9999.000000       0.121600       0.734000
50639     50639     neimenggu      122.7300       48.0000           48       211     2012      10        05        279              0.188500      10.956635       0.026766       0.303835   -9999.000000       0.145800   -9999.000000       0.807000
50639     50639     neimenggu      122.7300       48.0000           48       211     2012      10        06        280              0.182917       9.326508       0.000000       0.297639       0.233500       0.171600       0.134900       0.658000
50639     50639     neimenggu      122.7300       48.0000           48       211     2012      10        07        281              0.178792       9.185669       0.000000       0.295001       0.226000       0.084200       0.146300       0.646000
50639     50639     neimenggu      122.7300       48.0000           48       211     2012      10        08        282              0.176667       8.370270       0.481525       0.293702       0.222000       0.226500       0.088800       0.654000
50639     50639     neimenggu      122.7300       48.0000           48       211     2012      10        09        283              0.207250       9.010925       9.683013       0.294047       0.235000   -9999.000000       0.111200       0.913000
50639     50639     neimenggu      122.7300       48.0000           48       211     2012      10        10        284              0.201500       7.605438       0.000000       0.317450   -9999.000000       0.349800       0.105000       0.714000
50639     50639     neimenggu      122.7300       48.0000           48       211     2012      10        11        285              0.196250       6.082153       0.705505       0.301852       0.211000       0.240000       0.119000       0.683000
50639     50639     neimenggu      122.7300       48.0000           48       211     2012      10        12        286              0.193667       5.976837       1.895607       0.300330       0.223000   -9999.000000       0.112600       0.716000
50639     50639     neimenggu      122.7300       48.0000           48       211     2012      10        13        287              0.229792       5.681976       1.918691       0.299306   -9999.000000   -9999.000000       0.098100       0.635000
50639     50639     neimenggu      122.7300       48.0000           48       211     2012      10        14        288              0.228500       3.453339       0.393601       0.304753       0.220000       0.048400       0.097900       0.835000
50639     50639     neimenggu      122.7300       48.0000           48       211     2012      10        15        289              0.219167       4.711578       0.124913       0.300683   -9999.000000       0.091700       0.081900       0.742000
50639     50639     neimenggu      122.7300       48.0000           48       211     2012      10        16        290              0.231750       4.453827       1.634820       0.297912   -9999.000000       0.034200   -9999.000000       0.664000
50639     50639     neimenggu      122.7300       48.0000           48       211     2012      10        17        291              0.238083       2.530609       3.117121       0.299146   -9999.000000   -9999.000000       0.075000       0.732000
50639     50639     neimenggu      122.7300       48.0000           48       211     2012      10        18        292              0.228167       1.836060       0.656842       0.294237   -9999.000000       0.268200       0.073800       0.579000
50639     50639     neimenggu      122.7300       48.0000           48       211     2012      10        19        293              0.219083       1.317932       0.504603       0.275997   -9999.000000   -9999.000000       0.058400       0.662000
50639     50639     neimenggu      122.7300       48.0000           48       211     2012      10        20        294              0.210042       1.235748       0.264680       0.265341   -9999.000000   -9999.000000       0.057700       0.536000
50639     50639     neimenggu      122.7300       48.0000           48       211     2012      10        21        295              0.201708       0.842285       3.883253       0.245071   -9999.000000   -9999.000000       0.057400       0.491000
50639     50639     neimenggu      122.7300       48.0000           48       211     2012      10        22        296              0.197875       0.570740       0.029936       0.230901   -9999.000000   -9999.000000   -9999.000000       0.621000
50639     50639     neimenggu      122.7300       48.0000           48       211     2012      10        23        297              0.199833       0.578888       0.000000       0.216041   -9999.000000       0.195200       0.092800   -9999.000000
50639     50639     neimenggu      122.7300       48.0000           48       211     2012      10        24        298              0.202542       0.960968       0.124694       0.241812   -9999.000000   -9999.000000       0.067400       0.634000
50639     50639     neimenggu      122.7300       48.0000           48       211     2012      10        25        299              0.000000       1.059082       0.060489       0.250275   -9999.000000   -9999.000000       0.069400       0.618000
50639     50639     neimenggu      122.7300       48.0000           48       211     2012      10        26        300              0.201375       1.790375       0.000000       0.271106   -9999.000000       0.194000       0.084400       0.715000
50639     50639     neimenggu      122.7300       48.0000           48       211     2012      10        27        301              0.200542       2.692474       0.188175       0.287838   -9999.000000   -9999.000000   -9999.000000       0.731000
50639     50639     neimenggu      122.7300       48.0000           48       211     2012      10        28        302              0.000000       2.831238       0.000000       0.286699   -9999.000000       0.200000       0.080300       0.567000
50639     50639     neimenggu      122.7300       48.0000           48       211     2012      10        29        303              0.183750       1.046967       0.000000       0.248952   -9999.000000       0.116400       0.065500       0.318000
50639     50639     neimenggu      122.7300       48.0000           48       211     2012      10        30        304              0.164375      -0.543488       0.000000       0.168446   -9999.000000   -9999.000000       0.061800       0.265000
50639     50639     neimenggu      122.7300       48.0000           48       211     2012      10        31        305              0.142708      -1.136047       0.000000       0.142743   -9999.000000   -9999.000000       0.062600       0.277000
50639     50639     neimenggu      122.7300       48.0000           48       211     2012      11        01        306              0.126167      -1.923187       0.000000       0.132604   -9999.000000   -9999.000000       0.062900       0.254000
50639     50639     neimenggu      122.7300       48.0000           48       211     2012      11        02        307              0.127917      -2.141632       0.000000       0.127888   -9999.000000   -9999.000000   -9999.000000       0.286000
50639     50639     neimenggu      122.7300       48.0000           48       211     2012      11        03        308              0.136667      -1.827179       0.000000       0.129401   -9999.000000       0.149600       0.069600       0.313000
50639     50639     neimenggu      122.7300       48.0000           48       211     2012      11        04        309              0.141917      -1.510834       0.000000       0.133888   -9999.000000   -9999.000000       0.066100       0.332000
50639     50639     neimenggu      122.7300       48.0000           48       211     2012      11        05        310              0.128500      -1.221497       0.000000       0.143742   -9999.000000   -9999.000000       0.058100       0.257000
50639     50639     neimenggu      122.7300       48.0000           48       211     2012      11        06        311              0.116708      -2.038483       0.000000       0.134475   -9999.000000       0.075700       0.059500       0.289000
50639     50639     neimenggu      122.7300       48.0000           48       211     2012      11        07        312              0.110792      -2.458954       0.000000       0.130297   -9999.000000   -9999.000000       0.058000       0.310000
50639     50639     neimenggu      122.7300       48.0000           48       211     2012      11        08        313              0.113500      -2.099701       0.000000       0.128274   -9999.000000       0.130600   -9999.000000       0.282000
50639     50639     neimenggu      122.7300       48.0000           48       211     2012      11        09        314              0.110792      -1.700989       0.000000       0.139743       0.155000   -9999.000000       0.059700       0.344000
50639     50639     neimenggu      122.7300       48.0000           48       211     2012      11        10        315              0.112458      -1.911011       1.389712       0.130980   -9999.000000   -9999.000000       0.060100       0.185000
50639     50639     neimenggu      122.7300       48.0000           48       211     2012      11        11        316              0.116500      -2.032227       0.424953       0.125350   -9999.000000   -9999.000000       0.057200       0.220000
50639     50639     neimenggu      122.7300       48.0000           48       211     2012      11        12        317              0.121542      -2.220306       0.115714       0.124075   -9999.000000   -9999.000000       0.051600       0.226000
50639     50639     neimenggu      122.7300       48.0000           48       211     2012      11        13        318              0.000000      -1.804108       0.603172       0.127660   -9999.000000   -9999.000000   -9999.000000       0.311000
50639     50639     neimenggu      122.7300       48.0000           48       211     2012      11        14        319              0.139792      -2.256744       0.594573       0.125143   -9999.000000   -9999.000000       0.046000       0.165000
50639     50639     neimenggu      122.7300       48.0000           48       211     2012      11        15        320              0.144250      -3.496887       0.074520       0.121456   -9999.000000   -9999.000000       0.044200       0.103000
50639     50639     neimenggu      122.7300       48.0000           48       211     2012      11        16        321              0.144000      -5.314270       0.000000       0.112856   -9999.000000   -9999.000000       0.040900       0.097000
50639     50639     neimenggu      122.7300       48.0000           48       211     2012      11        17        322              0.000000      -6.025574       2.530186       0.109418   -9999.000000   -9999.000000       0.040600       0.072000
50639     50639     neimenggu      122.7300       48.0000           48       211     2012      11        18        323              0.150167      -7.135712       0.000000       0.108557   -9999.000000   -9999.000000       0.047300       0.087000
50639     50639     neimenggu      122.7300       48.0000           48       211     2012      11        19        324              0.152500      -8.819092       0.000000       0.105711   -9999.000000   -9999.000000   -9999.000000       0.147000
50639     50639     neimenggu      122.7300       48.0000           48       211     2012      11        20        325              0.152333      -8.909363       2.500244       0.105296   -9999.000000   -9999.000000       0.038900       0.080000
50639     50639     neimenggu      122.7300       48.0000           48       211     2012      11        21        326              0.153417      -6.916840       0.000000       0.105390   -9999.000000   -9999.000000       0.039900   -9999.000000
50639     50639     neimenggu      122.7300       48.0000           48       211     2012      11        22        327              0.148792      -6.549469       0.000000       0.105713   -9999.000000   -9999.000000       0.038900       0.043000
50639     50639     neimenggu      122.7300       48.0000           48       211     2012      11        23        328              0.142000      -7.622101       0.000000       0.105720   -9999.000000   -9999.000000       0.039900       0.115000
50639     50639     neimenggu      122.7300       48.0000           48       211     2012      11        24        329              0.135625      -8.476135       0.000000       0.105519   -9999.000000   -9999.000000       0.039700       0.091000
50639     50639     neimenggu      122.7300       48.0000           48       211     2012      11        25        330              0.135458      -8.749023       0.000000       0.105404   -9999.000000   -9999.000000   -9999.000000       0.088000
50639     50639     neimenggu      122.7300       48.0000           48       211     2012      11        26        331              0.134125      -8.212219       0.000000       0.105473   -9999.000000   -9999.000000   -9999.000000       0.041000
50639     50639     neimenggu      122.7300       48.0000           48       211     2012      11        27        332              0.128500     -10.063934       0.000000       0.104634   -9999.000000   -9999.000000       0.036700       0.004000
50639     50639     neimenggu      122.7300       48.0000           48       211     2012      11        28        333              0.129417     -11.395569       0.000000       0.102970   -9999.000000   -9999.000000       0.030400       0.012000
50639     50639     neimenggu      122.7300       48.0000           48       211     2012      11        29        334              0.126417     -11.186676       0.000000       0.102731   -9999.000000   -9999.000000       0.029300       0.047000
50639     50639     neimenggu      122.7300       48.0000           48       211     2012      11        30        335              0.121792     -13.399872       0.000000       0.100982   -9999.000000   -9999.000000   -9999.000000       0.048000
50639     50639     neimenggu      122.7300       48.0000           48       211     2012      12        01        336              0.117292     -14.501373       0.000000       0.099452   -9999.000000   -9999.000000       0.028800       0.032000
50639     50639     neimenggu      122.7300       48.0000           48       211     2012      12        02        337              0.118292     -14.909180       0.000000       0.098446   -9999.000000   -9999.000000       0.025600       0.052000
50639     50639     neimenggu      122.7300       48.0000           48       211     2012      12        03        338              0.117917     -14.428192       0.000000       0.098627   -9999.000000   -9999.000000       0.024200       0.053000
50639     50639     neimenggu      122.7300       48.0000           48       211     2012      12        04        339              0.116250     -15.521851       0.000000       0.098068   -9999.000000   -9999.000000       0.025000       0.114000
50639     50639     neimenggu      122.7300       48.0000           48       211     2012      12        05        340              0.113792     -16.238953       0.000000       0.097382   -9999.000000   -9999.000000       0.024200       0.121000
50639     50639     neimenggu      122.7300       48.0000           48       211     2012      12        06        341              0.110417     -17.700729       0.000000       0.096591   -9999.000000   -9999.000000   -9999.000000       0.079000
50639     50639     neimenggu      122.7300       48.0000           48       211     2012      12        07        342              0.107542     -19.790329       0.000000       0.095364   -9999.000000   -9999.000000       0.019500   -9999.000000
50639     50639     neimenggu      122.7300       48.0000           48       211     2012      12        08        343              0.106417     -19.938644       0.000000       0.094458   -9999.000000   -9999.000000       0.024400       0.086000
50639     50639     neimenggu      122.7300       48.0000           48       211     2012      12        09        344              0.108708     -14.396179       0.000000       0.095356   -9999.000000   -9999.000000       0.020000       0.116000
50639     50639     neimenggu      122.7300       48.0000           48       211     2012      12        10        345              0.111625     -11.847809       0.000000       0.096078   -9999.000000   -9999.000000       0.019100       0.012000
50639     50639     neimenggu      122.7300       48.0000           48       211     2012      12        11        346              0.112000     -12.765594       0.000000       0.096728   -9999.000000   -9999.000000   -9999.000000       0.038000
50639     50639     neimenggu      122.7300       48.0000           48       211     2012      12        12        347              0.111458     -12.673920       0.000000       0.096865   -9999.000000   -9999.000000       0.015700       0.131000
50639     50639     neimenggu      122.7300       48.0000           48       211     2012      12        13        348              0.110833     -14.922485       0.000000       0.096142   -9999.000000   -9999.000000       0.017700       0.114000
50639     50639     neimenggu      122.7300       48.0000           48       211     2012      12        14        349              0.109167     -14.627869       0.493491       0.096055   -9999.000000   -9999.000000       0.017700       0.006000
50639     50639     neimenggu      122.7300       48.0000           48       211     2012      12        15        350              0.000000     -14.734344       0.990017       0.096195   -9999.000000   -9999.000000       0.013400       0.045000
50639     50639     neimenggu      122.7300       48.0000           48       211     2012      12        16        351              0.108083     -13.359314       0.000000       0.096457   -9999.000000   -9999.000000       0.013700       0.069000
50639     50639     neimenggu      122.7300       48.0000           48       211     2012      12        17        352              0.106792     -12.384094       0.000000       0.096725   -9999.000000   -9999.000000   -9999.000000       0.086000
50639     50639     neimenggu      122.7300       48.0000           48       211     2012      12        18        353              0.105208     -12.275543       0.000000       0.096896   -9999.000000   -9999.000000       0.012900       0.083000
50639     50639     neimenggu      122.7300       48.0000           48       211     2012      12        19        354              0.104083     -12.261353       0.000000       0.097024   -9999.000000   -9999.000000       0.011300       0.047000
50639     50639     neimenggu      122.7300       48.0000           48       211     2012      12        20        355              0.000000     -12.777802       0.000000       0.097114   -9999.000000   -9999.000000       0.010000   -9999.000000
50639     50639     neimenggu      122.7300       48.0000           48       211     2012      12        21        356              0.101958     -13.240143       0.000000       0.097160   -9999.000000   -9999.000000       0.010000       0.048000
50639     50639     neimenggu      122.7300       48.0000           48       211     2012      12        22        357              0.100333     -13.301697       0.000000       0.097199   -9999.000000   -9999.000000       0.010000       0.036000
50639     50639     neimenggu      122.7300       48.0000           48       211     2012      12        23        358              0.097750     -15.523743       0.000000       0.096859   -9999.000000   -9999.000000   -9999.000000       0.107000
50639     50639     neimenggu      122.7300       48.0000           48       211     2012      12        24        359              0.095800     -17.560089       0.000000       0.095983   -9999.000000   -9999.000000       0.010000       0.017000
50639     50639     neimenggu      122.7300       48.0000           48       211     2012      12        25        360              0.094208     -18.768158       0.000000       0.095654   -9999.000000   -9999.000000       0.010000       0.030000
50639     50639     neimenggu      122.7300       48.0000           48       211     2012      12        26        361              0.000000     -19.677460       0.000000       0.095303   -9999.000000   -9999.000000       0.010000       0.095000
50639     50639     neimenggu      122.7300       48.0000           48       211     2012      12        27        362              0.091545     -19.618774       0.000000       0.094894   -9999.000000   -9999.000000       0.010000       0.118000
50639     50639     neimenggu      122.7300       48.0000           48       211     2012      12        28        363              0.000000     -18.972580       2.847175       0.094935   -9999.000000   -9999.000000   -9999.000000       0.107000
50639     50639     neimenggu      122.7300       48.0000           48       211     2012      12        29        364              0.000000     -17.741592       0.393473       0.094901   -9999.000000   -9999.000000   -9999.000000       0.006000
50639     50639     neimenggu      122.7300       48.0000           48       211     2012      12        30        365              0.000000     -15.378113       0.000000       0.095099   -9999.000000   -9999.000000       0.010000       0.040000
50639     50639     neimenggu      122.7300       48.0000           48       211     2012      12        31        366              0.093000     -14.020386       0.000000       0.095221   -9999.000000   -9999.000000       0.010000       0.039000
