# Supplementary material for: Research on Fusing Multisatellite Soil Moisture Data Based on Bayesian Model Averaging
Source: Hindawi journal article supplement (doi:10.1155/2018/9310838), 2018-06-25
Supplement: f1 [file 9310838.f1.zip › 2012_sm00-10cm_daily_ZDB_ZHY_50833_366days_allin.txt]

50833     50833     neimenggu      122.9114       46.7167           53       212     2012      01        01        001              0.000000   -9999.000000       0.000000   -9999.000000   -9999.000000   -9999.000000       0.087900   -9999.000000
50833     50833     neimenggu      122.9114       46.7167           53       212     2012      01        02        002              0.000000      -8.652802       0.000000       0.162072   -9999.000000   -9999.000000   -9999.000000       0.157000
50833     50833     neimenggu      122.9114       46.7167           53       212     2012      01        03        003              0.000000      -8.366333       0.000000       0.162062   -9999.000000   -9999.000000       0.075700       0.078000
50833     50833     neimenggu      122.9114       46.7167           53       212     2012      01        04        004              0.000000      -8.107452       0.000000       0.162043   -9999.000000   -9999.000000       0.076600       0.174000
50833     50833     neimenggu      122.9114       46.7167           53       212     2012      01        05        005              0.000000      -7.995728       0.000000       0.162017   -9999.000000   -9999.000000       0.083000       0.084000
50833     50833     neimenggu      122.9114       46.7167           53       212     2012      01        06        006              0.000000      -8.042877       0.000000       0.161985   -9999.000000   -9999.000000       0.084300       0.008000
50833     50833     neimenggu      122.9114       46.7167           53       212     2012      01        07        007              0.000000      -8.192139       0.000000       0.161949   -9999.000000   -9999.000000       0.086600       0.173000
50833     50833     neimenggu      122.9114       46.7167           53       212     2012      01        08        008              0.000000      -8.582214       0.000000       0.161910   -9999.000000   -9999.000000   -9999.000000       0.003000
50833     50833     neimenggu      122.9114       46.7167           53       212     2012      01        09        009              0.000000      -8.977234       0.000000       0.161870   -9999.000000   -9999.000000       0.068200       0.169000
50833     50833     neimenggu      122.9114       46.7167           53       212     2012      01        10        010              0.000000      -9.456696       0.000000       0.161831   -9999.000000   -9999.000000   -9999.000000       0.039000
50833     50833     neimenggu      122.9114       46.7167           53       212     2012      01        11        011              0.000000     -10.233978       0.000000       0.161795   -9999.000000   -9999.000000       0.068000       0.016000
50833     50833     neimenggu      122.9114       46.7167           53       212     2012      01        12        012              0.000000     -10.709076       0.000000       0.161761   -9999.000000   -9999.000000       0.069700   -9999.000000
50833     50833     neimenggu      122.9114       46.7167           53       212     2012      01        13        013              0.000000     -10.970001       0.000000       0.161733   -9999.000000   -9999.000000       0.070700       0.002000
50833     50833     neimenggu      122.9114       46.7167           53       212     2012      01        14        014              0.000000     -11.041779       0.000000       0.161710   -9999.000000   -9999.000000   -9999.000000   -9999.000000
50833     50833     neimenggu      122.9114       46.7167           53       212     2012      01        15        015              0.000000     -10.758667       0.000000       0.161690   -9999.000000   -9999.000000       0.062800       0.013000
50833     50833     neimenggu      122.9114       46.7167           53       212     2012      01        16        016              0.000000     -10.451538       0.000000       0.161670   -9999.000000   -9999.000000       0.078100       0.014000
50833     50833     neimenggu      122.9114       46.7167           53       212     2012      01        17        017              0.000000     -10.926941       0.000000       0.161652   -9999.000000   -9999.000000       0.075600       0.098000
50833     50833     neimenggu      122.9114       46.7167           53       212     2012      01        18        018              0.000000     -11.476776       0.000000       0.161636   -9999.000000   -9999.000000       0.080100       0.013000
50833     50833     neimenggu      122.9114       46.7167           53       212     2012      01        19        019              0.000000     -11.882599       0.000000       0.161623   -9999.000000   -9999.000000   -9999.000000       0.062000
50833     50833     neimenggu      122.9114       46.7167           53       212     2012      01        20        020              0.000000     -11.997406       0.000000       0.161613   -9999.000000   -9999.000000       0.067500   -9999.000000
50833     50833     neimenggu      122.9114       46.7167           53       212     2012      01        21        021              0.000000     -12.162445       0.000000       0.161604   -9999.000000   -9999.000000       0.069600       0.064000
50833     50833     neimenggu      122.9114       46.7167           53       212     2012      01        22        022              0.000000     -12.661163       0.000000       0.161597   -9999.000000   -9999.000000       0.074700       0.094000
50833     50833     neimenggu      122.9114       46.7167           53       212     2012      01        23        023              0.000000     -13.210693       0.000000       0.161593   -9999.000000   -9999.000000       0.082800       0.059000
50833     50833     neimenggu      122.9114       46.7167           53       212     2012      01        24        024              0.000000     -13.651031       0.000000       0.161594   -9999.000000   -9999.000000       0.087400       0.186000
50833     50833     neimenggu      122.9114       46.7167           53       212     2012      01        25        025              0.000000     -13.956665       0.000000       0.161593   -9999.000000   -9999.000000   -9999.000000   -9999.000000
50833     50833     neimenggu      122.9114       46.7167           53       212     2012      01        26        026              0.000000     -14.010773       0.000000       0.161565   -9999.000000   -9999.000000       0.073300       0.080000
50833     50833     neimenggu      122.9114       46.7167           53       212     2012      01        27        027              0.000000     -13.778198       0.000000       0.161568   -9999.000000   -9999.000000       0.074200       0.103000
50833     50833     neimenggu      122.9114       46.7167           53       212     2012      01        28        028              0.000000     -14.094482       0.000000       0.161559   -9999.000000   -9999.000000       0.082900       0.099000
50833     50833     neimenggu      122.9114       46.7167           53       212     2012      01        29        029              0.000000     -14.631439       0.000000       0.161447   -9999.000000   -9999.000000       0.088300       0.134000
50833     50833     neimenggu      122.9114       46.7167           53       212     2012      01        30        030              0.000000     -15.127472       0.000000       0.161320   -9999.000000   -9999.000000       0.088300   -9999.000000
50833     50833     neimenggu      122.9114       46.7167           53       212     2012      01        31        031              0.000000     -15.184845       0.000000       0.161330   -9999.000000   -9999.000000       0.073100       0.123000
50833     50833     neimenggu      122.9114       46.7167           53       212     2012      02        01        032              0.000000     -15.604919       0.000000       0.161327   -9999.000000   -9999.000000   -9999.000000       0.068000
50833     50833     neimenggu      122.9114       46.7167           53       212     2012      02        02        033              0.000000     -15.079010       0.000000       0.161340   -9999.000000   -9999.000000       0.083200       0.146000
50833     50833     neimenggu      122.9114       46.7167           53       212     2012      02        03        034              0.000000     -13.856812       0.000000       0.161349   -9999.000000   -9999.000000       0.082400       0.080000
50833     50833     neimenggu      122.9114       46.7167           53       212     2012      02        04        035              0.000000     -13.342712       0.000000       0.161358   -9999.000000   -9999.000000       0.086300       0.003000
50833     50833     neimenggu      122.9114       46.7167           53       212     2012      02        05        036              0.000000     -12.129364       0.000000       0.161363   -9999.000000   -9999.000000   -9999.000000       0.169000
50833     50833     neimenggu      122.9114       46.7167           53       212     2012      02        06        037              0.000000     -11.379395       0.000000       0.161603   -9999.000000   -9999.000000       0.078900       0.015000
50833     50833     neimenggu      122.9114       46.7167           53       212     2012      02        07        038              0.000000     -12.105255       0.000000       0.161667   -9999.000000   -9999.000000       0.079200       0.127000
50833     50833     neimenggu      122.9114       46.7167           53       212     2012      02        08        039              0.000000     -13.086365       0.000000       0.161620   -9999.000000   -9999.000000       0.087100       0.037000
50833     50833     neimenggu      122.9114       46.7167           53       212     2012      02        09        040              0.000000     -12.692596       0.000000       0.161715   -9999.000000   -9999.000000       0.088800       0.003000
50833     50833     neimenggu      122.9114       46.7167           53       212     2012      02        10        041              0.000000     -12.543274       0.000000       0.161712   -9999.000000   -9999.000000       0.089800   -9999.000000
50833     50833     neimenggu      122.9114       46.7167           53       212     2012      02        11        042              0.000000     -12.805267       0.000000       0.161731   -9999.000000   -9999.000000   -9999.000000       0.038000
50833     50833     neimenggu      122.9114       46.7167           53       212     2012      02        12        043              0.000000     -13.061401       0.000000       0.161617   -9999.000000   -9999.000000       0.080000   -9999.000000
50833     50833     neimenggu      122.9114       46.7167           53       212     2012      02        13        044              0.000000     -12.064453       0.000000       0.161629   -9999.000000   -9999.000000       0.088800       0.021000
50833     50833     neimenggu      122.9114       46.7167           53       212     2012      02        14        045              0.000000     -11.335724       0.000000       0.161827   -9999.000000   -9999.000000       0.088100       0.045000
50833     50833     neimenggu      122.9114       46.7167           53       212     2012      02        15        046              0.000000     -12.174164       0.000000       0.161789   -9999.000000   -9999.000000       0.092800       0.110000
50833     50833     neimenggu      122.9114       46.7167           53       212     2012      02        16        047              0.000000     -11.680084       0.000000       0.161884   -9999.000000   -9999.000000       0.093700       0.023000
50833     50833     neimenggu      122.9114       46.7167           53       212     2012      02        17        048              0.000000     -12.700989       0.000000       0.161829   -9999.000000   -9999.000000       0.078900       0.156000
50833     50833     neimenggu      122.9114       46.7167           53       212     2012      02        18        049              0.000000     -12.169006       0.000000       0.162017   -9999.000000   -9999.000000   -9999.000000       0.021000
50833     50833     neimenggu      122.9114       46.7167           53       212     2012      02        19        050              0.000000      -9.771698       0.000000       0.163095   -9999.000000   -9999.000000       0.090500       0.080000
50833     50833     neimenggu      122.9114       46.7167           53       212     2012      02        20        051              0.000000      -9.316650       0.000000       0.163976   -9999.000000   -9999.000000       0.080500       0.078000
50833     50833     neimenggu      122.9114       46.7167           53       212     2012      02        21        052              0.000000     -12.921051       0.000000       0.162161   -9999.000000   -9999.000000       0.089000       0.072000
50833     50833     neimenggu      122.9114       46.7167           53       212     2012      02        22        053              0.000000     -11.785492       0.000000       0.161805   -9999.000000   -9999.000000   -9999.000000       0.100000
50833     50833     neimenggu      122.9114       46.7167           53       212     2012      02        23        054              0.000000     -10.848907       0.000000       0.161999   -9999.000000   -9999.000000       0.074200   -9999.000000
50833     50833     neimenggu      122.9114       46.7167           53       212     2012      02        24        055              0.000000      -8.302307       0.000000       0.166134   -9999.000000   -9999.000000       0.077400       0.080000
50833     50833     neimenggu      122.9114       46.7167           53       212     2012      02        25        056              0.000000      -7.292877       0.000000       0.169359   -9999.000000   -9999.000000       0.083700       0.104000
50833     50833     neimenggu      122.9114       46.7167           53       212     2012      02        26        057              0.000000      -9.282562       0.000000       0.162922   -9999.000000   -9999.000000       0.087000       0.085000
50833     50833     neimenggu      122.9114       46.7167           53       212     2012      02        27        058              0.000000      -8.875763       0.000000       0.162398   -9999.000000   -9999.000000       0.091700       0.115000
50833     50833     neimenggu      122.9114       46.7167           53       212     2012      02        28        059              0.000000      -5.073059       0.000000       0.184947       0.092000   -9999.000000   -9999.000000   -9999.000000
50833     50833     neimenggu      122.9114       46.7167           53       212     2012      02        29        060              0.000000   -9999.000000       0.000000   -9999.000000   -9999.000000   -9999.000000   -9999.000000   -9999.000000
50833     50833     neimenggu      122.9114       46.7167           53       212     2012      03        01        061              0.000000      -2.676422       0.000000       0.220445   -9999.000000       0.011400       0.083300       0.067000
50833     50833     neimenggu      122.9114       46.7167           53       212     2012      03        02        062              0.000000      -6.812653       0.000000       0.188603   -9999.000000   -9999.000000       0.081200       0.092000
50833     50833     neimenggu      122.9114       46.7167           53       212     2012      03        03        063              0.000000      -8.139069       0.000000       0.176974       0.107000   -9999.000000       0.090900       0.056000
50833     50833     neimenggu      122.9114       46.7167           53       212     2012      03        04        064              0.000000      -6.282654       0.000000       0.186112   -9999.000000       0.160900       0.088100   -9999.000000
50833     50833     neimenggu      122.9114       46.7167           53       212     2012      03        05        065              0.000000      -4.574554       0.805752       0.196774   -9999.000000   -9999.000000       0.079100       0.029000
50833     50833     neimenggu      122.9114       46.7167           53       212     2012      03        06        066              0.000000      -4.388062       0.091521       0.194500   -9999.000000       0.007500       0.079600       0.012000
50833     50833     neimenggu      122.9114       46.7167           53       212     2012      03        07        067              0.000000      -5.002258       0.000000       0.198376       0.105000   -9999.000000       0.089100       0.141000
50833     50833     neimenggu      122.9114       46.7167           53       212     2012      03        08        068              0.000000      -3.805634       0.000000       0.202182       0.113000       0.018000       0.085300       0.034000
50833     50833     neimenggu      122.9114       46.7167           53       212     2012      03        09        069              0.000000      -4.561951       0.000000       0.205844       0.105000       0.156400       0.090800       0.012000
50833     50833     neimenggu      122.9114       46.7167           53       212     2012      03        10        070              0.000000      -4.867249       0.000000       0.196821   -9999.000000   -9999.000000   -9999.000000   -9999.000000
50833     50833     neimenggu      122.9114       46.7167           53       212     2012      03        11        071              0.000000      -5.763702       0.000000       0.193515   -9999.000000   -9999.000000       0.077200       0.015000
50833     50833     neimenggu      122.9114       46.7167           53       212     2012      03        12        072              0.000000      -5.751282       0.000000       0.192433       0.093000   -9999.000000       0.080700   -9999.000000
50833     50833     neimenggu      122.9114       46.7167           53       212     2012      03        13        073              0.000000      -4.498016       0.000000       0.200220       0.113000   -9999.000000       0.085500       0.014000
50833     50833     neimenggu      122.9114       46.7167           53       212     2012      03        14        074              0.000000      -1.715424       0.030109       0.233169       0.108000   -9999.000000       0.092000       0.016000
50833     50833     neimenggu      122.9114       46.7167           53       212     2012      03        15        075              0.000000      -1.210449       0.044451       0.234148       0.094000   -9999.000000       0.099800       0.181000
50833     50833     neimenggu      122.9114       46.7167           53       212     2012      03        16        076              0.000000       2.121674       0.000000       0.283236   -9999.000000       0.061500   -9999.000000       0.083000
50833     50833     neimenggu      122.9114       46.7167           53       212     2012      03        17        077              0.000000       1.661957       0.000000       0.278210   -9999.000000   -9999.000000       0.075300       0.009000
50833     50833     neimenggu      122.9114       46.7167           53       212     2012      03        18        078              0.000000      -6.176849       0.000000       0.188156       0.103000   -9999.000000       0.084800   -9999.000000
50833     50833     neimenggu      122.9114       46.7167           53       212     2012      03        19        079              0.000000      -3.019867       0.000000       0.214235       0.103000       0.011000       0.087600       0.040000
50833     50833     neimenggu      122.9114       46.7167           53       212     2012      03        20        080              0.000000      -2.324036       0.000000       0.225987       0.090000   -9999.000000       0.096000       0.088000
50833     50833     neimenggu      122.9114       46.7167           53       212     2012      03        21        081              0.000000       0.074677       0.000000       0.243296   -9999.000000       0.035300       0.097400       0.108000
50833     50833     neimenggu      122.9114       46.7167           53       212     2012      03        22        082              0.000000       2.487396       0.305366       0.277964   -9999.000000   -9999.000000       0.082000       0.089000
50833     50833     neimenggu      122.9114       46.7167           53       212     2012      03        23        083              0.000000       2.942474       0.000000       0.277715       0.104000   -9999.000000       0.085400   -9999.000000
50833     50833     neimenggu      122.9114       46.7167           53       212     2012      03        24        084              0.000000       1.971191       0.303175       0.279244       0.116000       0.015100       0.091100       0.122000
50833     50833     neimenggu      122.9114       46.7167           53       212     2012      03        25        085              0.000000       1.125122       0.000000       0.267113       0.106000       0.094800       0.090900       0.117000
50833     50833     neimenggu      122.9114       46.7167           53       212     2012      03        26        086              0.000000       1.601562       0.000000       0.270121       0.112000       0.012900       0.090600       0.091000
50833     50833     neimenggu      122.9114       46.7167           53       212     2012      03        27        087              0.000000       5.246552       0.000000       0.312691   -9999.000000   -9999.000000   -9999.000000       0.159000
50833     50833     neimenggu      122.9114       46.7167           53       212     2012      03        28        088              0.000000       5.439087       0.000000       0.295539       0.092000   -9999.000000       0.081500   -9999.000000
50833     50833     neimenggu      122.9114       46.7167           53       212     2012      03        29        089              0.000000       7.482910       0.000000       0.319686       0.110000       0.071100       0.090900       0.115000
50833     50833     neimenggu      122.9114       46.7167           53       212     2012      03        30        090              0.000000       3.244324       1.948659       0.279642       0.123000   -9999.000000       0.077500       0.015000
50833     50833     neimenggu      122.9114       46.7167           53       212     2012      03        31        091              0.000000       1.411713       0.819043       0.275258   -9999.000000       0.137600       0.083500       0.005000
50833     50833     neimenggu      122.9114       46.7167           53       212     2012      04        01        092              0.000000      -1.785797       0.082768       0.232776   -9999.000000       0.110000       0.087700       0.002000
50833     50833     neimenggu      122.9114       46.7167           53       212     2012      04        02        093              0.000000      -0.637146       0.000000       0.244199       0.106000   -9999.000000   -9999.000000       0.014000
50833     50833     neimenggu      122.9114       46.7167           53       212     2012      04        03        094              0.000000       1.661652       0.000000       0.268196       0.118000       0.014500       0.082900       0.115000
50833     50833     neimenggu      122.9114       46.7167           53       212     2012      04        04        095              0.000000       3.259552       0.000000       0.286272       0.111000   -9999.000000       0.096900       0.073000
50833     50833     neimenggu      122.9114       46.7167           53       212     2012      04        05        096              0.000000       2.997986       0.000000       0.282661       0.086000   -9999.000000       0.086300       0.005000
50833     50833     neimenggu      122.9114       46.7167           53       212     2012      04        06        097              0.000000       0.493439       0.000000       0.256775   -9999.000000       0.022000       0.092500   -9999.000000
50833     50833     neimenggu      122.9114       46.7167           53       212     2012      04        07        098              0.000000       1.634247       0.000000       0.265470       0.098000       0.025100       0.096000       0.007000
50833     50833     neimenggu      122.9114       46.7167           53       212     2012      04        08        099              0.000000       5.829346       0.000000       0.312441       0.105000       0.033300       0.089700   -9999.000000
50833     50833     neimenggu      122.9114       46.7167           53       212     2012      04        09        100              0.000000       4.813568       0.163774       0.315186       0.102000       0.144100       0.084700       0.022000
50833     50833     neimenggu      122.9114       46.7167           53       212     2012      04        10        101              0.000000       9.370667       0.000000       0.320185       0.083000   -9999.000000       0.090900   -9999.000000
50833     50833     neimenggu      122.9114       46.7167           53       212     2012      04        11        102              0.000000       5.464020       0.382447       0.302437   -9999.000000   -9999.000000       0.113800   -9999.000000
50833     50833     neimenggu      122.9114       46.7167           53       212     2012      04        12        103              0.000000       7.689850       0.000000       0.316393   -9999.000000   -9999.000000       0.100200       0.026000
50833     50833     neimenggu      122.9114       46.7167           53       212     2012      04        13        104              0.000000       8.228149       0.000000       0.316000       0.093000       0.031200   -9999.000000       0.201000
50833     50833     neimenggu      122.9114       46.7167           53       212     2012      04        14        105              0.000000       9.732758       0.072646       0.304984       0.092000       0.157500       0.108600       0.056000
50833     50833     neimenggu      122.9114       46.7167           53       212     2012      04        15        106              0.000000       6.777618       0.149176       0.311853       0.099000   -9999.000000       0.085100       0.042000
50833     50833     neimenggu      122.9114       46.7167           53       212     2012      04        16        107              0.000000       6.960815       0.341883       0.302446       0.101000       0.004000       0.095500   -9999.000000
50833     50833     neimenggu      122.9114       46.7167           53       212     2012      04        17        108              0.000000       8.470551       0.420320       0.307556   -9999.000000   -9999.000000   -9999.000000       0.040000
50833     50833     neimenggu      122.9114       46.7167           53       212     2012      04        18        109              0.000000      12.163177       0.000000       0.306124       0.093500   -9999.000000       0.101600       0.122000
50833     50833     neimenggu      122.9114       46.7167           53       212     2012      04        19        110              0.000000      14.475952       0.053537       0.305046       0.098000       0.019700   -9999.000000       0.104000
50833     50833     neimenggu      122.9114       46.7167           53       212     2012      04        20        111              0.000000      16.042999       0.000000       0.299553       0.097000   -9999.000000   -9999.000000       0.078000
50833     50833     neimenggu      122.9114       46.7167           53       212     2012      04        21        112              0.000000      12.136230       0.000000       0.295163       0.112000       0.041400       0.109400       0.001000
50833     50833     neimenggu      122.9114       46.7167           53       212     2012      04        22        113              0.000000      15.553131       0.000000       0.293997       0.112000   -9999.000000       0.102800       0.063000
50833     50833     neimenggu      122.9114       46.7167           53       212     2012      04        23        114              0.000000      16.621826       0.610791       0.288761       0.115500       0.028500       0.120600       0.137000
50833     50833     neimenggu      122.9114       46.7167           53       212     2012      04        24        115              0.000000      16.905762       0.083301       0.288615       0.106000       0.134500   -9999.000000       0.082000
50833     50833     neimenggu      122.9114       46.7167           53       212     2012      04        25        116              0.000000      12.208893       0.000000       0.293756       0.100000       0.043000       0.080200       0.079000
50833     50833     neimenggu      122.9114       46.7167           53       212     2012      04        26        117              0.000000      10.419128       0.000000       0.289265       0.076000       0.064700       0.079400   -9999.000000
50833     50833     neimenggu      122.9114       46.7167           53       212     2012      04        27        118              0.000000      10.393890       3.774023       0.284111   -9999.000000   -9999.000000       0.104500       0.111000
50833     50833     neimenggu      122.9114       46.7167           53       212     2012      04        28        119              0.000000       6.676727       0.000000       0.316473       0.111000   -9999.000000       0.091900       0.006000
50833     50833     neimenggu      122.9114       46.7167           53       212     2012      04        29        120              0.000000       9.272034       4.258740       0.302828       0.103000       0.053100       0.097500       0.129000
50833     50833     neimenggu      122.9114       46.7167           53       212     2012      04        30        121              0.000000      11.899536       0.273503       0.313597       0.098000   -9999.000000   -9999.000000       0.113000
50833     50833     neimenggu      122.9114       46.7167           53       212     2012      05        01        122              0.000000      12.650208       0.069062       0.311479       0.106000       0.048600       0.085600       0.012000
50833     50833     neimenggu      122.9114       46.7167           53       212     2012      05        02        123              0.000000      13.420532       0.000000       0.301706       0.117500       0.105600       0.088100       0.138000
50833     50833     neimenggu      122.9114       46.7167           53       212     2012      05        03        124              0.000000      16.060944       0.000000       0.294632       0.105000   -9999.000000       0.091200       0.070000
50833     50833     neimenggu      122.9114       46.7167           53       212     2012      05        04        125              0.000000      17.412292       0.000000       0.286322       0.090000       0.100500       0.098200       0.119000
50833     50833     neimenggu      122.9114       46.7167           53       212     2012      05        05        126              0.000000      15.615906       0.000000       0.282389       0.095000       0.056600       0.104600       0.094000
50833     50833     neimenggu      122.9114       46.7167           53       212     2012      05        06        127              0.000000      15.424530       0.000000       0.277560       0.116500       0.146800       0.093700       0.050000
50833     50833     neimenggu      122.9114       46.7167           53       212     2012      05        07        128              0.000000      15.412109       0.000000       0.274350   -9999.000000       0.177600       0.087600   -9999.000000
50833     50833     neimenggu      122.9114       46.7167           53       212     2012      05        08        129              0.000000      17.213898       0.000000       0.271628       0.125000   -9999.000000       0.102000       0.042000
50833     50833     neimenggu      122.9114       46.7167           53       212     2012      05        09        130              0.000000      16.549561       0.000000       0.268888       0.107000       0.129900       0.097300   -9999.000000
50833     50833     neimenggu      122.9114       46.7167           53       212     2012      05        10        131              0.000000      17.063568       0.000000       0.266465       0.101000   -9999.000000       0.102500       0.048000
50833     50833     neimenggu      122.9114       46.7167           53       212     2012      05        11        132              0.000000      16.876373       0.081600       0.265416       0.143500       0.074800   -9999.000000       0.048000
50833     50833     neimenggu      122.9114       46.7167           53       212     2012      05        12        133              0.000000      17.576172       8.305532       0.262704   -9999.000000       0.487600       0.226500       0.016000
50833     50833     neimenggu      122.9114       46.7167           53       212     2012      05        13        134              0.000000      12.927917       8.918920       0.316386   -9999.000000   -9999.000000       0.211700       0.350000
50833     50833     neimenggu      122.9114       46.7167           53       212     2012      05        14        135              0.000000      13.396759       0.136545       0.338921       0.174000       0.328100       0.182300       0.266000
50833     50833     neimenggu      122.9114       46.7167           53       212     2012      05        15        136              0.000000      13.760193      10.096761       0.326805       0.161000   -9999.000000       0.272000       0.663000
50833     50833     neimenggu      122.9114       46.7167           53       212     2012      05        16        137              0.000000      13.036346       4.850117       0.340344   -9999.000000   -9999.000000       0.282500       0.776000
50833     50833     neimenggu      122.9114       46.7167           53       212     2012      05        17        138              0.000000      12.501953       0.232725       0.358423       0.205000       0.516700   -9999.000000       0.434000
50833     50833     neimenggu      122.9114       46.7167           53       212     2012      05        18        139              0.000000      18.013916       0.000000       0.335605       0.205000   -9999.000000       0.122600       0.193000
50833     50833     neimenggu      122.9114       46.7167           53       212     2012      05        19        140              0.000000      20.225159       1.226582       0.322504       0.177000       0.263900       0.121900       0.094000
50833     50833     neimenggu      122.9114       46.7167           53       212     2012      05        20        141              0.000000      18.237152       0.000000       0.309971       0.113000       0.177200       0.128400       0.187000
50833     50833     neimenggu      122.9114       46.7167           53       212     2012      05        21        142              0.000000      20.038605       0.000000       0.302064       0.139000   -9999.000000       0.113200       0.054000
50833     50833     neimenggu      122.9114       46.7167           53       212     2012      05        22        143              0.000000      23.112244       2.279050       0.291232       0.254000       0.142600       0.124600       0.545000
50833     50833     neimenggu      122.9114       46.7167           53       212     2012      05        23        144              0.000000      15.913849       0.000000       0.309703   -9999.000000       0.096700       0.107500       0.063000
50833     50833     neimenggu      122.9114       46.7167           53       212     2012      05        24        145              0.000000      15.610138       0.291091       0.295902   -9999.000000       0.144600       0.100100       0.100000
50833     50833     neimenggu      122.9114       46.7167           53       212     2012      05        25        146              0.000000      15.991943       7.412118       0.290096       0.183500       0.080100       0.204300       0.022000
50833     50833     neimenggu      122.9114       46.7167           53       212     2012      05        26        147              0.000000      17.651031       0.327190       0.301717       0.151000   -9999.000000       0.124000       0.251000
50833     50833     neimenggu      122.9114       46.7167           53       212     2012      05        27        148              0.000000      18.425873       0.000000       0.316869       0.204000       0.222400       0.129100       0.055000
50833     50833     neimenggu      122.9114       46.7167           53       212     2012      05        28        149              0.000000      21.074005       0.000000       0.297999       0.207000       0.214900   -9999.000000       0.112000
50833     50833     neimenggu      122.9114       46.7167           53       212     2012      05        29        150              0.000000      19.984985       0.560483       0.289640       0.273000       0.193700       0.104100       0.270000
50833     50833     neimenggu      122.9114       46.7167           53       212     2012      05        30        151              0.000000      20.913788       0.718978       0.285974       0.241500       0.221800       0.123400   -9999.000000
50833     50833     neimenggu      122.9114       46.7167           53       212     2012      05        31        152              0.000000      17.135315       5.816398       0.296631       0.156000   -9999.000000       0.117200   -9999.000000
50833     50833     neimenggu      122.9114       46.7167           53       212     2012      06        01        153              0.000000      17.920532       0.760499       0.305665       0.317500       0.299100       0.143300       0.201000
50833     50833     neimenggu      122.9114       46.7167           53       212     2012      06        02        154              0.000000      18.998413       0.788045       0.325429       0.290000   -9999.000000       0.153900       0.225000
50833     50833     neimenggu      122.9114       46.7167           53       212     2012      06        03        155              0.000000      18.550262       0.215050       0.315951       0.320000   -9999.000000   -9999.000000       0.270000
50833     50833     neimenggu      122.9114       46.7167           53       212     2012      06        04        156              0.000000      19.663208       0.174627       0.309018       0.283000       0.052000       0.126000       0.129000
50833     50833     neimenggu      122.9114       46.7167           53       212     2012      06        05        157              0.000000      19.037231       0.114748       0.307701       0.185000       0.184800       0.115100   -9999.000000
50833     50833     neimenggu      122.9114       46.7167           53       212     2012      06        06        158              0.000000      22.611725      13.394129       0.296487   -9999.000000   -9999.000000       0.216500       0.870000
50833     50833     neimenggu      122.9114       46.7167           53       212     2012      06        07        159              0.000000      20.342041       2.779632       0.346935       0.340000   -9999.000000       0.194800   -9999.000000
50833     50833     neimenggu      122.9114       46.7167           53       212     2012      06        08        160              0.165000      21.169983       0.167034       0.340348       0.326000   -9999.000000       0.142100       0.361000
50833     50833     neimenggu      122.9114       46.7167           53       212     2012      06        09        161              0.000000      20.980377       3.927474       0.324959       0.291000       0.242500       0.110100       0.199000
50833     50833     neimenggu      122.9114       46.7167           53       212     2012      06        10        162              0.000000      20.021271       0.114461       0.319044       0.233000       0.179800       0.101500       0.243000
50833     50833     neimenggu      122.9114       46.7167           53       212     2012      06        11        163              0.000000      18.626251      18.707739       0.308077       0.222000       0.100300       0.196100       0.923000
50833     50833     neimenggu      122.9114       46.7167           53       212     2012      06        12        164              0.000000      16.600861      23.802940       0.356243       0.500000       0.475800       0.214300       0.910000
50833     50833     neimenggu      122.9114       46.7167           53       212     2012      06        13        165              0.000000      16.087799       1.838905       0.391070   -9999.000000   -9999.000000       0.223600       1.000000
50833     50833     neimenggu      122.9114       46.7167           53       212     2012      06        14        166              0.000000      18.375916       4.291612       0.375421       0.500000       0.388700   -9999.000000       0.763000
50833     50833     neimenggu      122.9114       46.7167           53       212     2012      06        15        167              0.000000      19.272736      30.768349       0.364737   -9999.000000       0.645500       0.211200       0.811000
50833     50833     neimenggu      122.9114       46.7167           53       212     2012      06        16        168              0.000000      17.499084       0.652648       0.395851       0.500000       0.543000       0.224300       0.882000
50833     50833     neimenggu      122.9114       46.7167           53       212     2012      06        17        169              0.000000      19.164093       3.826048       0.389084       0.499000       0.420400       0.190400       0.779000
50833     50833     neimenggu      122.9114       46.7167           53       212     2012      06        18        170              0.000000      20.202057       0.000000       0.380413       0.495000   -9999.000000       0.200500       0.616000
50833     50833     neimenggu      122.9114       46.7167           53       212     2012      06        19        171              0.000000      22.965240       0.000000       0.366438       0.421000       0.275000       0.173500       0.514000
50833     50833     neimenggu      122.9114       46.7167           53       212     2012      06        20        172              0.000000      24.446442       0.000000       0.356383       0.288000       0.304000   -9999.000000       0.375000
50833     50833     neimenggu      122.9114       46.7167           53       212     2012      06        21        173              0.000000      25.621094       0.000000       0.348797       0.301000   -9999.000000       0.117600       0.494000
50833     50833     neimenggu      122.9114       46.7167           53       212     2012      06        22        174              0.000000      25.539551       0.000000       0.342165       0.304000       0.088100       0.113500       0.461000
50833     50833     neimenggu      122.9114       46.7167           53       212     2012      06        23        175              0.000000      24.768738       0.048334       0.335158       0.291500   -9999.000000       0.111900       0.245000
50833     50833     neimenggu      122.9114       46.7167           53       212     2012      06        24        176              0.000000      25.631653       7.432230       0.331207       0.466000       0.107900       0.166900       0.548000
50833     50833     neimenggu      122.9114       46.7167           53       212     2012      06        25        177              0.000000      24.610626       0.085930       0.343498       0.405000       0.479800       0.194600       0.798000
50833     50833     neimenggu      122.9114       46.7167           53       212     2012      06        26        178              0.000000      24.654541       3.466095       0.347290       0.278000   -9999.000000       0.138800       0.673000
50833     50833     neimenggu      122.9114       46.7167           53       212     2012      06        27        179              0.000000      25.775940       3.179133       0.342596       0.420000       0.375700       0.181300       0.751000
50833     50833     neimenggu      122.9114       46.7167           53       212     2012      06        28        180              0.000000      24.325378       3.615371       0.352231       0.350500       0.185800       0.183300       0.879000
50833     50833     neimenggu      122.9114       46.7167           53       212     2012      06        29        181              0.000000      24.847290      20.134071       0.344997       0.490000       0.270000       0.207200       0.954000
50833     50833     neimenggu      122.9114       46.7167           53       212     2012      06        30        182              0.000000      21.634430       1.726238       0.389942       0.387000       0.247600       0.189300   -9999.000000
50833     50833     neimenggu      122.9114       46.7167           53       212     2012      07        01        183              0.000000      24.352600      48.277397       0.364134   -9999.000000   -9999.000000   -9999.000000       1.000000
50833     50833     neimenggu      122.9114       46.7167           53       212     2012      07        02        184              0.000000      20.117523      13.736521       0.399497   -9999.000000       0.491500       0.271200       1.000000
50833     50833     neimenggu      122.9114       46.7167           53       212     2012      07        03        185              0.000000      20.606598       4.925366       0.407108       0.498000       0.492900       0.223800       1.000000
50833     50833     neimenggu      122.9114       46.7167           53       212     2012      07        04        186              0.000000      21.493622       0.036960       0.389584       0.500000       0.371000       0.209500   -9999.000000
50833     50833     neimenggu      122.9114       46.7167           53       212     2012      07        05        187              0.000000      24.670471       0.000000       0.374991   -9999.000000       0.388100       0.175800       0.801000
50833     50833     neimenggu      122.9114       46.7167           53       212     2012      07        06        188              0.000000      26.141052       0.036783       0.365664   -9999.000000       0.238400       0.165500   -9999.000000
50833     50833     neimenggu      122.9114       46.7167           53       212     2012      07        07        189              0.000000      26.976349       0.000000       0.357968   -9999.000000       0.154400   -9999.000000       0.564000
50833     50833     neimenggu      122.9114       46.7167           53       212     2012      07        08        190              0.000000      27.300476       2.883363       0.350873       0.448000   -9999.000000       0.159400       0.686000
50833     50833     neimenggu      122.9114       46.7167           53       212     2012      07        09        191              0.000000      26.239166       1.097953       0.355503       0.347000   -9999.000000       0.218200       0.763000
50833     50833     neimenggu      122.9114       46.7167           53       212     2012      07        10        192              0.000000      26.351105       6.317660       0.351493       0.411000       0.180200       0.265600       1.000000
50833     50833     neimenggu      122.9114       46.7167           53       212     2012      07        11        193              0.000000      24.946564      22.879038       0.361962       0.500000       0.364600       0.313900       0.840000
50833     50833     neimenggu      122.9114       46.7167           53       212     2012      07        12        194              0.000000      22.530060       0.269196       0.396014       0.496000       0.271900   -9999.000000       0.961000
50833     50833     neimenggu      122.9114       46.7167           53       212     2012      07        13        195              0.000000      22.839478       0.951039       0.375748       0.414000       0.276700       0.231600       0.938000
50833     50833     neimenggu      122.9114       46.7167           53       212     2012      07        14        196              0.000000      24.878998       0.000000       0.362926       0.390000   -9999.000000       0.200600       0.726000
50833     50833     neimenggu      122.9114       46.7167           53       212     2012      07        15        197              0.000000      25.993622       0.000000       0.355292       0.320000       0.154400       0.197100       0.660000
50833     50833     neimenggu      122.9114       46.7167           53       212     2012      07        16        198              0.000000      27.158691       0.000000       0.348861       0.393000       0.214700       0.230500       0.600000
50833     50833     neimenggu      122.9114       46.7167           53       212     2012      07        17        199              0.000000      27.407043       0.000000       0.342168       0.285000       0.189100       0.236500       0.462000
50833     50833     neimenggu      122.9114       46.7167           53       212     2012      07        18        200              0.000000      27.488129       0.000000       0.334646       0.304000       0.115400   -9999.000000       0.618000
50833     50833     neimenggu      122.9114       46.7167           53       212     2012      07        19        201              0.000000      26.050079       0.180159       0.333742       0.327500   -9999.000000       0.199900       0.472000
50833     50833     neimenggu      122.9114       46.7167           53       212     2012      07        20        202              0.173857      27.797424       0.000000       0.329400       0.324000       0.202900       0.202200       0.596000
50833     50833     neimenggu      122.9114       46.7167           53       212     2012      07        21        203              0.172050      27.139435      12.264356       0.324237   -9999.000000   -9999.000000       0.268300       0.749000
50833     50833     neimenggu      122.9114       46.7167           53       212     2012      07        22        204              0.314000      26.351532      30.408792       0.351486   -9999.000000   -9999.000000       0.277300       0.997000
50833     50833     neimenggu      122.9114       46.7167           53       212     2012      07        23        205              0.326875      21.561340       0.000000       0.398327       0.498000       0.306400       0.317500       0.627000
50833     50833     neimenggu      122.9114       46.7167           53       212     2012      07        24        206              0.310125      24.531799       5.342390       0.373681   -9999.000000   -9999.000000   -9999.000000       0.904000
50833     50833     neimenggu      122.9114       46.7167           53       212     2012      07        25        207              0.313167      26.056671      17.953754       0.372499       0.456000       0.349900       0.271700       0.632000
50833     50833     neimenggu      122.9114       46.7167           53       212     2012      07        26        208              0.319833      26.958527       3.325063       0.384198       0.500000   -9999.000000       0.312200       0.732000
50833     50833     neimenggu      122.9114       46.7167           53       212     2012      07        27        209              0.296304      24.802399       0.000000       0.383626       0.500000   -9999.000000       0.278500       0.779000
50833     50833     neimenggu      122.9114       46.7167           53       212     2012      07        28        210              0.350400      25.732544      69.717270       0.367296   -9999.000000       0.160200       0.390800       0.472000
50833     50833     neimenggu      122.9114       46.7167           53       212     2012      07        29        211              0.355650      23.128387      10.926791       0.412591   -9999.000000       0.499200   -9999.000000       0.808000
50833     50833     neimenggu      122.9114       46.7167           53       212     2012      07        30        212              0.344381      19.048798       1.952588       0.407648       0.500000       0.238700       0.281400       0.694000
50833     50833     neimenggu      122.9114       46.7167           53       212     2012      07        31        213              0.321087      20.605560       0.000000       0.390985       0.498000   -9999.000000       0.259400       0.722000
50833     50833     neimenggu      122.9114       46.7167           53       212     2012      08        01        214              0.307571      23.415588       0.000000       0.378216   -9999.000000   -9999.000000       0.252700       0.705000
50833     50833     neimenggu      122.9114       46.7167           53       212     2012      08        02        215              0.298850      23.899841       0.000000       0.371516   -9999.000000       0.249300       0.268300   -9999.000000
50833     50833     neimenggu      122.9114       46.7167           53       212     2012      08        03        216              0.285950      21.898529       0.000000       0.366960   -9999.000000       0.163800       0.265500       0.615000
50833     50833     neimenggu      122.9114       46.7167           53       212     2012      08        04        217              0.268909      23.531464       0.107328       0.362683   -9999.000000       0.211500   -9999.000000   -9999.000000
50833     50833     neimenggu      122.9114       46.7167           53       212     2012      08        05        218              0.246333      24.928986       0.000000       0.359106       0.475000       0.223500       0.215300       0.520000
50833     50833     neimenggu      122.9114       46.7167           53       212     2012      08        06        219              0.217190      26.463928       0.000000       0.354737   -9999.000000   -9999.000000       0.214800       0.460000
50833     50833     neimenggu      122.9114       46.7167           53       212     2012      08        07        220              0.197600      27.583923       1.366945       0.349599       0.495000       0.266200       0.207300       0.394000
50833     50833     neimenggu      122.9114       46.7167           53       212     2012      08        08        221              0.196150      27.024170       0.104938       0.346394       0.488000       0.337700       0.226300       0.435000
50833     50833     neimenggu      122.9114       46.7167           53       212     2012      08        09        222              0.182958      24.654144       0.103283       0.345563       0.493000       0.208800       0.222500       0.434000
50833     50833     neimenggu      122.9114       46.7167           53       212     2012      08        10        223              0.179292      21.917267       1.455017       0.338827       0.498000       0.080800       0.198800       0.383000
50833     50833     neimenggu      122.9114       46.7167           53       212     2012      08        11        224              0.177042      19.753479       0.000000       0.346220   -9999.000000   -9999.000000       0.196200       0.388000
50833     50833     neimenggu      122.9114       46.7167           53       212     2012      08        12        225              0.174875      20.030609       0.519025       0.340638   -9999.000000       0.172000       0.220500       0.523000
50833     50833     neimenggu      122.9114       46.7167           53       212     2012      08        13        226              0.170870      20.637665       0.067451       0.339247   -9999.000000       0.179100       0.263900       0.512000
50833     50833     neimenggu      122.9114       46.7167           53       212     2012      08        14        227              0.168667      22.117371       0.792349       0.335434       0.500000   -9999.000000       0.293700       0.448000
50833     50833     neimenggu      122.9114       46.7167           53       212     2012      08        15        228              0.165667      22.885773       0.000000       0.336209       0.500000       0.124700   -9999.000000       0.351000
50833     50833     neimenggu      122.9114       46.7167           53       212     2012      08        16        229              0.163500      22.023834       0.000000       0.330812   -9999.000000       0.174100       0.255400       0.519000
50833     50833     neimenggu      122.9114       46.7167           53       212     2012      08        17        230              0.161417      23.369568       1.173485       0.327783   -9999.000000   -9999.000000       0.265600       0.455000
50833     50833     neimenggu      122.9114       46.7167           53       212     2012      08        18        231              0.158792      23.887329       0.000000       0.328955   -9999.000000   -9999.000000       0.270700       0.469000
50833     50833     neimenggu      122.9114       46.7167           53       212     2012      08        19        232              0.154958      22.638031       0.000000       0.324272   -9999.000000   -9999.000000       0.271000       0.492000
50833     50833     neimenggu      122.9114       46.7167           53       212     2012      08        20        233              0.150292      22.584229       0.000000       0.319787   -9999.000000       0.180300       0.310000       0.366000
50833     50833     neimenggu      122.9114       46.7167           53       212     2012      08        21        234              0.148583      18.707367       0.000000       0.319739       0.430000       0.163800   -9999.000000       0.384000
50833     50833     neimenggu      122.9114       46.7167           53       212     2012      08        22        235              0.147208      18.714233       0.000000       0.315853       0.500000       0.143500       0.258900   -9999.000000
50833     50833     neimenggu      122.9114       46.7167           53       212     2012      08        23        236              0.145750      18.699188       0.000000       0.313552       0.500000       0.081500       0.276800       0.430000
50833     50833     neimenggu      122.9114       46.7167           53       212     2012      08        24        237              0.144417      21.194855       0.000000       0.309466       0.494500   -9999.000000       0.282800   -9999.000000
50833     50833     neimenggu      122.9114       46.7167           53       212     2012      08        25        238              0.000000      23.270233       0.000000       0.308460       0.492000   -9999.000000       0.306600   -9999.000000
50833     50833     neimenggu      122.9114       46.7167           53       212     2012      08        26        239              0.305375      23.961487       0.000000       0.305852       0.480000   -9999.000000       0.310800       0.442000
50833     50833     neimenggu      122.9114       46.7167           53       212     2012      08        27        240              0.293042      23.312103       0.000000       0.302685       0.500000       0.030500       0.222600       0.464000
50833     50833     neimenggu      122.9114       46.7167           53       212     2012      08        28        241              0.284375      24.301239       0.000000       0.302140       0.498000       0.118300       0.220400       0.483000
50833     50833     neimenggu      122.9114       46.7167           53       212     2012      08        29        242              0.272042      24.384552       0.000000       0.299828       0.465500   -9999.000000       0.255700       0.424000
50833     50833     neimenggu      122.9114       46.7167           53       212     2012      08        30        243              0.264000      20.782837       0.000000       0.295890       0.483000       0.181400       0.243400       0.398000
50833     50833     neimenggu      122.9114       46.7167           53       212     2012      08        31        244              0.261125      21.703033       0.000000       0.293906       0.496500       0.085800       0.251500   -9999.000000
50833     50833     neimenggu      122.9114       46.7167           53       212     2012      09        01        245              0.260083      24.894714       2.709844       0.293782       0.419500       0.213500   -9999.000000       0.427000
50833     50833     neimenggu      122.9114       46.7167           53       212     2012      09        02        246              0.349875      23.571228      21.335344       0.299067   -9999.000000       0.055400       0.279200   -9999.000000
50833     50833     neimenggu      122.9114       46.7167           53       212     2012      09        03        247              0.327333      14.590576       0.000000       0.374794   -9999.000000   -9999.000000       0.257300       0.637000
50833     50833     neimenggu      122.9114       46.7167           53       212     2012      09        04        248              0.316591      14.446198       1.362570       0.350227   -9999.000000       0.157400       0.237400       0.653000
50833     50833     neimenggu      122.9114       46.7167           53       212     2012      09        05        249              0.314800      15.605438       0.706658       0.343315       0.500000       0.286700       0.248700       0.632000
50833     50833     neimenggu      122.9114       46.7167           53       212     2012      09        06        250              0.307550      16.721161       0.000000       0.341093       0.497500   -9999.000000       0.244300       0.495000
50833     50833     neimenggu      122.9114       46.7167           53       212     2012      09        07        251              0.302391      18.480774       0.000000       0.334416       0.498500       0.121800   -9999.000000       0.457000
50833     50833     neimenggu      122.9114       46.7167           53       212     2012      09        08        252              0.299208      20.310577       0.272767       0.330538       0.500000       0.339500       0.206100       0.446000
50833     50833     neimenggu      122.9114       46.7167           53       212     2012      09        09        253              0.294500      20.803772       0.000000       0.328039       0.475500       0.249500       0.230500       0.513000
50833     50833     neimenggu      122.9114       46.7167           53       212     2012      09        10        254              0.329250      20.854523      23.345348       0.325642       0.454000       0.336200       0.264700       0.490000
50833     50833     neimenggu      122.9114       46.7167           53       212     2012      09        11        255              0.366550      20.330902      18.117786       0.356073       0.492500   -9999.000000       0.322200       0.859000
50833     50833     neimenggu      122.9114       46.7167           53       212     2012      09        12        256              0.344450      14.330719       3.684722       0.391450       0.489500       0.422800   -9999.000000       0.641000
50833     50833     neimenggu      122.9114       46.7167           53       212     2012      09        13        257              0.339000      12.398773       2.956792       0.382107       0.480000       0.531400       0.286800       0.788000
50833     50833     neimenggu      122.9114       46.7167           53       212     2012      09        14        258              0.328417      13.029083       0.056143       0.377027       0.369000       0.294700       0.309400       0.667000
50833     50833     neimenggu      122.9114       46.7167           53       212     2012      09        15        259              0.321125      15.904236       0.000000       0.365855   -9999.000000       0.330400       0.268500       0.723000
50833     50833     neimenggu      122.9114       46.7167           53       212     2012      09        16        260              0.316652      16.867645       0.000000       0.359927       0.398000   -9999.000000       0.262000       0.651000
50833     50833     neimenggu      122.9114       46.7167           53       212     2012      09        17        261              0.312600      17.714905       0.000000       0.355702       0.364500       0.209700       0.239600       0.536000
50833     50833     neimenggu      122.9114       46.7167           53       212     2012      09        18        262              0.308450      17.786041       0.000000       0.352331       0.439000       0.216700   -9999.000000       0.555000
50833     50833     neimenggu      122.9114       46.7167           53       212     2012      09        19        263              0.305682      17.166199       0.681592       0.349027       0.388000       0.228500       0.217100       0.582000
50833     50833     neimenggu      122.9114       46.7167           53       212     2012      09        20        264              0.302250      18.163300       0.000000       0.348781       0.329000       0.184500       0.212900       0.435000
50833     50833     neimenggu      122.9114       46.7167           53       212     2012      09        21        265              0.300130      18.430420       0.085981       0.345683   -9999.000000       0.172000       0.214400       0.511000
50833     50833     neimenggu      122.9114       46.7167           53       212     2012      09        22        266              0.298250      18.558746       1.064108       0.344184       0.213000       0.239600       0.231800       0.625000
50833     50833     neimenggu      122.9114       46.7167           53       212     2012      09        23        267              0.296091      16.985443       0.923135       0.345258       0.218000       0.106900       0.231800       0.544000
50833     50833     neimenggu      122.9114       46.7167           53       212     2012      09        24        268              0.292952      15.274231       0.083956       0.343374       0.215000   -9999.000000       0.192600       0.566000
50833     50833     neimenggu      122.9114       46.7167           53       212     2012      09        25        269              0.309333      15.053986       6.131963       0.341432   -9999.000000       0.148800       0.209300       0.715000
50833     50833     neimenggu      122.9114       46.7167           53       212     2012      09        26        270              0.311500      13.559845       0.229835       0.359098       0.269000       0.314900       0.228600       0.603000
50833     50833     neimenggu      122.9114       46.7167           53       212     2012      09        27        271              0.323909      13.904999       7.028408       0.351501   -9999.000000       0.283400       0.256300       0.755000
50833     50833     neimenggu      122.9114       46.7167           53       212     2012      09        28        272              0.319533      11.226135       0.770866       0.365884       0.280000   -9999.000000       0.254500       0.784000
50833     50833     neimenggu      122.9114       46.7167           53       212     2012      09        29        273              0.313739      11.446533       0.000000       0.358745   -9999.000000   -9999.000000   -9999.000000   -9999.000000
50833     50833     neimenggu      122.9114       46.7167           53       212     2012      09        30        274              0.308917      10.802551       0.000000       0.351721   -9999.000000   -9999.000000       0.228300       0.618000
50833     50833     neimenggu      122.9114       46.7167           53       212     2012      10        01        275              0.306182      12.085175       0.499371       0.349606       0.190000   -9999.000000       0.190100   -9999.000000
50833     50833     neimenggu      122.9114       46.7167           53       212     2012      10        02        276              0.304455      13.467865       0.000000       0.348141       0.193000       0.358200       0.166700       0.593000
50833     50833     neimenggu      122.9114       46.7167           53       212     2012      10        03        277              0.305625      13.934479       0.627812       0.346274       0.213000       0.200100       0.173900       0.622000
50833     50833     neimenggu      122.9114       46.7167           53       212     2012      10        04        278              0.311417      13.024292       3.410464       0.348180       0.242000   -9999.000000       0.196700       0.723000
50833     50833     neimenggu      122.9114       46.7167           53       212     2012      10        05        279              0.305625      13.111603       1.565081       0.355288   -9999.000000       0.455900   -9999.000000       0.729000
50833     50833     neimenggu      122.9114       46.7167           53       212     2012      10        06        280              0.301000      11.074921       0.000000       0.349465       0.190000       0.332800       0.195200       0.560000
50833     50833     neimenggu      122.9114       46.7167           53       212     2012      10        07        281              0.298250      11.063324       0.020665       0.346521       0.204000       0.425100       0.211400       0.770000
50833     50833     neimenggu      122.9114       46.7167           53       212     2012      10        08        282              0.298333      10.424957       0.097332       0.345029       0.210000       0.329300       0.132200       0.750000
50833     50833     neimenggu      122.9114       46.7167           53       212     2012      10        09        283              0.314375      12.977234       1.515848       0.345215       0.184000       0.174900       0.168700       0.746000
50833     50833     neimenggu      122.9114       46.7167           53       212     2012      10        10        284              0.308625       9.935516       0.000000       0.349998   -9999.000000       0.186900       0.166200       0.819000
50833     50833     neimenggu      122.9114       46.7167           53       212     2012      10        11        285              0.302826       7.084534       1.019121       0.345891       0.183000   -9999.000000       0.173400       0.709000
50833     50833     neimenggu      122.9114       46.7167           53       212     2012      10        12        286              0.313875       7.857086       3.880219       0.348231       0.200000   -9999.000000       0.177800       0.841000
50833     50833     neimenggu      122.9114       46.7167           53       212     2012      10        13        287              0.328182       7.456848       0.136959       0.351861   -9999.000000       0.235900       0.168500       0.717000
50833     50833     neimenggu      122.9114       46.7167           53       212     2012      10        14        288              0.317304       5.514954       0.246171       0.355843   -9999.000000   -9999.000000       0.171900       0.941000
50833     50833     neimenggu      122.9114       46.7167           53       212     2012      10        15        289              0.313833       6.236511       0.068260       0.351816       0.228500       0.350900       0.151700       0.810000
50833     50833     neimenggu      122.9114       46.7167           53       212     2012      10        16        290              0.352292       7.133240      11.489217       0.350182   -9999.000000       0.250800   -9999.000000       0.876000
50833     50833     neimenggu      122.9114       46.7167           53       212     2012      10        17        291              0.330625       3.574097       1.170253       0.376384   -9999.000000   -9999.000000       0.180700       0.765000
50833     50833     neimenggu      122.9114       46.7167           53       212     2012      10        18        292              0.319042       3.508820       1.031255       0.357036   -9999.000000       0.278700       0.171200       0.893000
50833     50833     neimenggu      122.9114       46.7167           53       212     2012      10        19        293              0.314333       2.740692       0.455911       0.337182   -9999.000000       0.328000       0.116100       0.702000
50833     50833     neimenggu      122.9114       46.7167           53       212     2012      10        20        294              0.309000       3.240204       2.284969       0.339404   -9999.000000   -9999.000000       0.108800       0.607000
50833     50833     neimenggu      122.9114       46.7167           53       212     2012      10        21        295              0.305250       1.995575       0.083555       0.314351   -9999.000000       0.281900       0.113900       0.481000
50833     50833     neimenggu      122.9114       46.7167           53       212     2012      10        22        296              0.303625       1.379486       0.629540       0.299699   -9999.000000   -9999.000000   -9999.000000       0.520000
50833     50833     neimenggu      122.9114       46.7167           53       212     2012      10        23        297              0.303917       2.154572       2.032176       0.319954   -9999.000000   -9999.000000       0.109000       0.655000
50833     50833     neimenggu      122.9114       46.7167           53       212     2012      10        24        298              0.303042       3.412018       1.060684       0.341751   -9999.000000       0.174200       0.113600       0.510000
50833     50833     neimenggu      122.9114       46.7167           53       212     2012      10        25        299              0.000000       3.322754       0.104346       0.349230   -9999.000000       0.213200       0.101900       0.632000
50833     50833     neimenggu      122.9114       46.7167           53       212     2012      10        26        300              0.304591       5.533722       0.000000       0.353034       0.157000       0.303900       0.111100       0.601000
50833     50833     neimenggu      122.9114       46.7167           53       212     2012      10        27        301              0.303333       8.060425       0.102164       0.352740   -9999.000000   -9999.000000       0.104400       0.526000
50833     50833     neimenggu      122.9114       46.7167           53       212     2012      10        28        302              0.000000       5.632690       0.000000       0.343007   -9999.000000       0.217000       0.098800   -9999.000000
50833     50833     neimenggu      122.9114       46.7167           53       212     2012      10        29        303              0.290591       1.608276       0.000000       0.301946   -9999.000000       0.179100       0.091900       0.292000
50833     50833     neimenggu      122.9114       46.7167           53       212     2012      10        30        304              0.280375      -0.761719       0.000000       0.253346   -9999.000000   -9999.000000       0.090900   -9999.000000
50833     50833     neimenggu      122.9114       46.7167           53       212     2012      10        31        305              0.267125      -1.875488       0.000000       0.224315   -9999.000000   -9999.000000       0.086300       0.234000
50833     50833     neimenggu      122.9114       46.7167           53       212     2012      11        01        306              0.257087      -2.362823       0.000000       0.220921   -9999.000000   -9999.000000       0.094100       0.264000
50833     50833     neimenggu      122.9114       46.7167           53       212     2012      11        02        307              0.265167      -1.891022       0.000000       0.215842   -9999.000000       0.084600   -9999.000000       0.498000
50833     50833     neimenggu      122.9114       46.7167           53       212     2012      11        03        308              0.275762      -0.850464       0.000000       0.233636   -9999.000000   -9999.000000       0.091600       0.356000
50833     50833     neimenggu      122.9114       46.7167           53       212     2012      11        04        309              0.280500      -0.880310       0.000000       0.228980   -9999.000000   -9999.000000       0.089300       0.324000
50833     50833     neimenggu      122.9114       46.7167           53       212     2012      11        05        310              0.272875      -1.159637       0.000000       0.229156   -9999.000000       0.125700       0.077600       0.104000
50833     50833     neimenggu      122.9114       46.7167           53       212     2012      11        06        311              0.254182      -1.529083       0.000000       0.233434   -9999.000000       0.203500       0.079100       0.309000
50833     50833     neimenggu      122.9114       46.7167           53       212     2012      11        07        312              0.238500      -2.156586       0.000000       0.225242   -9999.000000       0.133900       0.082500       0.380000
50833     50833     neimenggu      122.9114       46.7167           53       212     2012      11        08        313              0.243125      -0.940216       0.000000       0.235572   -9999.000000       0.105100   -9999.000000       0.214000
50833     50833     neimenggu      122.9114       46.7167           53       212     2012      11        09        314              0.227000      -1.029205       0.000000       0.245725   -9999.000000   -9999.000000       0.074800       0.192000
50833     50833     neimenggu      122.9114       46.7167           53       212     2012      11        10        315              0.228542      -1.108490       0.000000       0.238612   -9999.000000       0.074300       0.083100       0.132000
50833     50833     neimenggu      122.9114       46.7167           53       212     2012      11        11        316              0.243167      -0.388367       0.000000       0.243129   -9999.000000   -9999.000000       0.074900       0.247000
50833     50833     neimenggu      122.9114       46.7167           53       212     2012      11        12        317              0.250542      -1.149170       0.472697       0.219332   -9999.000000   -9999.000000       0.069400       0.043000
50833     50833     neimenggu      122.9114       46.7167           53       212     2012      11        13        318              0.000000      -0.797089       2.654083       0.227391   -9999.000000   -9999.000000   -9999.000000       0.266000
50833     50833     neimenggu      122.9114       46.7167           53       212     2012      11        14        319              0.267167      -1.112610       2.763453       0.221936   -9999.000000   -9999.000000       0.058700       0.211000
50833     50833     neimenggu      122.9114       46.7167           53       212     2012      11        15        320              0.248333      -3.229156       0.293582       0.203232   -9999.000000       0.092800       0.056300       0.015000
50833     50833     neimenggu      122.9114       46.7167           53       212     2012      11        16        321              0.226542      -3.790131       0.127980       0.192794   -9999.000000       0.096700       0.054000       0.159000
50833     50833     neimenggu      122.9114       46.7167           53       212     2012      11        17        322              0.000000      -5.259674       0.790919       0.187141   -9999.000000   -9999.000000       0.054300       0.019000
50833     50833     neimenggu      122.9114       46.7167           53       212     2012      11        18        323              0.197750      -6.286957       0.000000       0.181059   -9999.000000   -9999.000000       0.059900       0.089000
50833     50833     neimenggu      122.9114       46.7167           53       212     2012      11        19        324              0.210500      -6.886688       0.251203       0.178372   -9999.000000   -9999.000000   -9999.000000       0.139000
50833     50833     neimenggu      122.9114       46.7167           53       212     2012      11        20        325              0.213292      -6.387177       0.072700       0.178990   -9999.000000   -9999.000000       0.045400       0.031000
50833     50833     neimenggu      122.9114       46.7167           53       212     2012      11        21        326              0.213333      -5.228119       0.283663       0.179353   -9999.000000       0.173200       0.045800       0.202000
50833     50833     neimenggu      122.9114       46.7167           53       212     2012      11        22        327              0.199292      -5.586151       0.000000       0.179381   -9999.000000   -9999.000000       0.044000       0.059000
50833     50833     neimenggu      122.9114       46.7167           53       212     2012      11        23        328              0.186000      -6.759735       0.399550       0.178345   -9999.000000   -9999.000000       0.048100       0.088000
50833     50833     neimenggu      122.9114       46.7167           53       212     2012      11        24        329              0.176208      -7.511749       0.000000       0.177654   -9999.000000   -9999.000000       0.050000       0.094000
50833     50833     neimenggu      122.9114       46.7167           53       212     2012      11        25        330              0.172458      -8.997437       0.000000       0.176114   -9999.000000   -9999.000000       0.042000       0.059000
50833     50833     neimenggu      122.9114       46.7167           53       212     2012      11        26        331              0.166250      -9.629303       0.000000       0.175446   -9999.000000   -9999.000000       0.037500   -9999.000000
50833     50833     neimenggu      122.9114       46.7167           53       212     2012      11        27        332              0.164958     -11.939026       0.000000       0.172331   -9999.000000   -9999.000000       0.045400       0.044000
50833     50833     neimenggu      122.9114       46.7167           53       212     2012      11        28        333              0.166917     -12.211578       0.049790       0.169644   -9999.000000   -9999.000000       0.040400   -9999.000000
50833     50833     neimenggu      122.9114       46.7167           53       212     2012      11        29        334              0.165042     -10.639893       0.069957       0.170098   -9999.000000   -9999.000000       0.042400       0.052000
50833     50833     neimenggu      122.9114       46.7167           53       212     2012      11        30        335              0.163250     -12.166351       0.000000       0.169377   -9999.000000   -9999.000000   -9999.000000       0.073000
50833     50833     neimenggu      122.9114       46.7167           53       212     2012      12        01        336              0.162000     -13.731445       0.000000       0.168967   -9999.000000   -9999.000000       0.034400       0.093000
50833     50833     neimenggu      122.9114       46.7167           53       212     2012      12        02        337              0.164583     -13.644623       0.000000       0.167201   -9999.000000   -9999.000000       0.030500       0.015000
50833     50833     neimenggu      122.9114       46.7167           53       212     2012      12        03        338              0.162000     -14.433350       0.000000       0.167201   -9999.000000   -9999.000000       0.025600       0.101000
50833     50833     neimenggu      122.9114       46.7167           53       212     2012      12        04        339              0.161667     -15.055359       0.000000       0.166673   -9999.000000   -9999.000000       0.023600   -9999.000000
50833     50833     neimenggu      122.9114       46.7167           53       212     2012      12        05        340              0.159833     -15.414398       0.000000       0.166373   -9999.000000   -9999.000000       0.025800       0.066000
50833     50833     neimenggu      122.9114       46.7167           53       212     2012      12        06        341              0.156625     -16.317505       0.000000       0.165397   -9999.000000   -9999.000000   -9999.000000       0.098000
50833     50833     neimenggu      122.9114       46.7167           53       212     2012      12        07        342              0.153833     -18.085663       0.000000       0.163873   -9999.000000   -9999.000000       0.016500   -9999.000000
50833     50833     neimenggu      122.9114       46.7167           53       212     2012      12        08        343              0.154167     -19.883133       0.000000       0.162324   -9999.000000   -9999.000000       0.030700       0.040000
50833     50833     neimenggu      122.9114       46.7167           53       212     2012      12        09        344              0.157500     -14.008789       0.000000       0.162384   -9999.000000   -9999.000000       0.023500   -9999.000000
50833     50833     neimenggu      122.9114       46.7167           53       212     2012      12        10        345              0.159500     -13.435577       4.314726       0.161570   -9999.000000   -9999.000000       0.022900       0.021000
50833     50833     neimenggu      122.9114       46.7167           53       212     2012      12        11        346              0.158167     -12.486420       2.630145       0.161799   -9999.000000   -9999.000000       0.020000       0.044000
50833     50833     neimenggu      122.9114       46.7167           53       212     2012      12        12        347              0.156000     -11.864655       0.000000       0.161981   -9999.000000   -9999.000000       0.013500       0.015000
50833     50833     neimenggu      122.9114       46.7167           53       212     2012      12        13        348              0.155875     -11.342285       0.000000       0.162036   -9999.000000   -9999.000000       0.013700       0.101000
50833     50833     neimenggu      122.9114       46.7167           53       212     2012      12        14        349              0.155000     -11.147797       1.811030       0.162076   -9999.000000   -9999.000000       0.018600   -9999.000000
50833     50833     neimenggu      122.9114       46.7167           53       212     2012      12        15        350              0.000000     -11.131744       2.459696       0.162108   -9999.000000   -9999.000000       0.016600       0.014000
50833     50833     neimenggu      122.9114       46.7167           53       212     2012      12        16        351              0.155000      -9.901245       0.000000       0.162136   -9999.000000   -9999.000000       0.017400       0.019000
50833     50833     neimenggu      122.9114       46.7167           53       212     2012      12        17        352              0.155000      -9.014648       0.000000       0.162159   -9999.000000   -9999.000000   -9999.000000       0.063000
50833     50833     neimenggu      122.9114       46.7167           53       212     2012      12        18        353              0.154000      -8.507294       0.000000       0.162177   -9999.000000   -9999.000000       0.010000       0.029000
50833     50833     neimenggu      122.9114       46.7167           53       212     2012      12        19        354              0.153000      -8.360138       0.000000       0.162189   -9999.000000   -9999.000000       0.010000   -9999.000000
50833     50833     neimenggu      122.9114       46.7167           53       212     2012      12        20        355              0.000000      -8.541107       0.000000       0.162193   -9999.000000   -9999.000000       0.010000       0.068000
50833     50833     neimenggu      122.9114       46.7167           53       212     2012      12        21        356              0.152917      -8.694672       0.000000       0.162191   -9999.000000   -9999.000000       0.010000       0.005000
50833     50833     neimenggu      122.9114       46.7167           53       212     2012      12        22        357              0.150917      -8.553192       0.000000       0.162182   -9999.000000   -9999.000000       0.010000       0.068000
50833     50833     neimenggu      122.9114       46.7167           53       212     2012      12        23        358              0.149833      -9.220093       0.000000       0.162171   -9999.000000   -9999.000000   -9999.000000       0.061000
50833     50833     neimenggu      122.9114       46.7167           53       212     2012      12        24        359              0.148000     -10.201660       0.377077       0.162158   -9999.000000   -9999.000000       0.010000   -9999.000000
50833     50833     neimenggu      122.9114       46.7167           53       212     2012      12        25        360              0.148000     -11.056427       0.000000       0.162146   -9999.000000   -9999.000000       0.010000   -9999.000000
50833     50833     neimenggu      122.9114       46.7167           53       212     2012      12        26        361              0.000000     -11.057892       0.000000       0.162138   -9999.000000   -9999.000000       0.010000   -9999.000000
50833     50833     neimenggu      122.9114       46.7167           53       212     2012      12        27        362              0.146000     -11.597717       0.000000       0.162135   -9999.000000   -9999.000000       0.010000   -9999.000000
50833     50833     neimenggu      122.9114       46.7167           53       212     2012      12        28        363              0.000000     -11.736115       3.546260       0.162138   -9999.000000   -9999.000000   -9999.000000       0.008000
50833     50833     neimenggu      122.9114       46.7167           53       212     2012      12        29        364              0.000000     -11.421814       1.155754       0.162144   -9999.000000   -9999.000000   -9999.000000   -9999.000000
50833     50833     neimenggu      122.9114       46.7167           53       212     2012      12        30        365              0.000000      -9.852234       0.000000       0.162150   -9999.000000   -9999.000000       0.010000       0.097000
50833     50833     neimenggu      122.9114       46.7167           53       212     2012      12        31        366              0.146000      -9.170166       0.000000       0.162155   -9999.000000   -9999.000000       0.010000   -9999.000000
