# Supplementary material for: Research on Fusing Multisatellite Soil Moisture Data Based on Bayesian Model Averaging
Source: Hindawi journal article supplement (doi:10.1155/2018/9310838), 2018-06-25
Supplement: f1 [file 9310838.f1.zip › 2012_sm00-10cm_daily_ZDB_ZHY_50838_366days_allin.txt]

50838     50838     neimenggu      121.5597       46.1300           55       206     2012      01        01        001              0.000000   -9999.000000       0.000000   -9999.000000   -9999.000000   -9999.000000       0.068400   -9999.000000
50838     50838     neimenggu      121.5597       46.1300           55       206     2012      01        02        002              0.131958      -7.702393       0.152009       0.090273   -9999.000000   -9999.000000   -9999.000000   -9999.000000
50838     50838     neimenggu      121.5597       46.1300           55       206     2012      01        03        003              0.000000      -7.396698       0.000000       0.090277   -9999.000000   -9999.000000       0.054200       0.044000
50838     50838     neimenggu      121.5597       46.1300           55       206     2012      01        04        004              0.131875      -7.168030       0.000000       0.090278   -9999.000000   -9999.000000       0.058000   -9999.000000
50838     50838     neimenggu      121.5597       46.1300           55       206     2012      01        05        005              0.131667      -7.260712       0.082693       0.090275   -9999.000000   -9999.000000       0.061900       0.042000
50838     50838     neimenggu      121.5597       46.1300           55       206     2012      01        06        006              0.131542      -7.510162       0.082709       0.090269   -9999.000000   -9999.000000       0.062100       0.042000
50838     50838     neimenggu      121.5597       46.1300           55       206     2012      01        07        007              0.131083      -7.707001       0.082703       0.090263   -9999.000000   -9999.000000       0.063400   -9999.000000
50838     50838     neimenggu      121.5597       46.1300           55       206     2012      01        08        008              0.000000      -7.979919       0.082696       0.090256   -9999.000000   -9999.000000       0.058200       0.053000
50838     50838     neimenggu      121.5597       46.1300           55       206     2012      01        09        009              0.131000      -8.099335       0.276630       0.090250   -9999.000000   -9999.000000       0.057900       0.054000
50838     50838     neimenggu      121.5597       46.1300           55       206     2012      01        10        010              0.130792      -8.360016       0.276630       0.090244   -9999.000000   -9999.000000   -9999.000000       0.012000
50838     50838     neimenggu      121.5597       46.1300           55       206     2012      01        11        011              0.130458      -8.525269       0.000000       0.090240   -9999.000000   -9999.000000       0.054400       0.010000
50838     50838     neimenggu      121.5597       46.1300           55       206     2012      01        12        012              0.130708      -8.693176       0.000000       0.090237   -9999.000000   -9999.000000       0.056300       0.033000
50838     50838     neimenggu      121.5597       46.1300           55       206     2012      01        13        013              0.130917      -8.451691       0.000000       0.090234   -9999.000000   -9999.000000   -9999.000000       0.031000
50838     50838     neimenggu      121.5597       46.1300           55       206     2012      01        14        014              0.131208      -8.388123       0.000000       0.090231   -9999.000000   -9999.000000       0.053900       0.070000
50838     50838     neimenggu      121.5597       46.1300           55       206     2012      01        15        015              0.131958      -8.665222       0.000000       0.090229   -9999.000000   -9999.000000       0.057400       0.042000
50838     50838     neimenggu      121.5597       46.1300           55       206     2012      01        16        016              0.131708      -9.188416       0.000000       0.090227   -9999.000000   -9999.000000       0.064900       0.081000
50838     50838     neimenggu      121.5597       46.1300           55       206     2012      01        17        017              0.000000      -9.911743       0.000000       0.090227   -9999.000000   -9999.000000       0.065600       0.060000
50838     50838     neimenggu      121.5597       46.1300           55       206     2012      01        18        018              0.131167     -10.591614       0.000000       0.090229   -9999.000000   -9999.000000       0.066300       0.008000
50838     50838     neimenggu      121.5597       46.1300           55       206     2012      01        19        019              0.131250     -10.842010       0.000000       0.090227   -9999.000000   -9999.000000   -9999.000000       0.060000
50838     50838     neimenggu      121.5597       46.1300           55       206     2012      01        20        020              0.130958     -11.295624       0.000000       0.090206   -9999.000000   -9999.000000       0.061500       0.016000
50838     50838     neimenggu      121.5597       46.1300           55       206     2012      01        21        021              0.130417     -12.033783       0.000000       0.090164   -9999.000000   -9999.000000       0.065700       0.069000
50838     50838     neimenggu      121.5597       46.1300           55       206     2012      01        22        022              0.130458     -12.650513       0.000000       0.090142   -9999.000000   -9999.000000       0.066900       0.040000
50838     50838     neimenggu      121.5597       46.1300           55       206     2012      01        23        023              0.130125     -12.813934       0.000000       0.090133   -9999.000000   -9999.000000       0.071400       0.026000
50838     50838     neimenggu      121.5597       46.1300           55       206     2012      01        24        024              0.130250     -13.022522       0.000000       0.090069   -9999.000000   -9999.000000       0.071500       0.053000
50838     50838     neimenggu      121.5597       46.1300           55       206     2012      01        25        025              0.130083     -13.136078       0.000000       0.090090   -9999.000000   -9999.000000       0.067800       0.050000
50838     50838     neimenggu      121.5597       46.1300           55       206     2012      01        26        026              0.130542     -12.888733       0.000000       0.090120   -9999.000000   -9999.000000       0.066800       0.052000
50838     50838     neimenggu      121.5597       46.1300           55       206     2012      01        27        027              0.130292     -12.691681       0.000000       0.090136   -9999.000000   -9999.000000       0.072600       0.077000
50838     50838     neimenggu      121.5597       46.1300           55       206     2012      01        28        028              0.129958     -13.073608       0.000000       0.090124   -9999.000000   -9999.000000       0.071600       0.008000
50838     50838     neimenggu      121.5597       46.1300           55       206     2012      01        29        029              0.129792     -13.394257       0.000000       0.090133   -9999.000000   -9999.000000       0.073800       0.121000
50838     50838     neimenggu      121.5597       46.1300           55       206     2012      01        30        030              0.129583     -13.897858       0.000000       0.090106   -9999.000000   -9999.000000   -9999.000000       0.077000
50838     50838     neimenggu      121.5597       46.1300           55       206     2012      01        31        031              0.129333     -14.493744       0.000000       0.090065   -9999.000000   -9999.000000       0.064200   -9999.000000
50838     50838     neimenggu      121.5597       46.1300           55       206     2012      02        01        032              0.129458     -14.730347       0.000000       0.090011   -9999.000000   -9999.000000   -9999.000000       0.008000
50838     50838     neimenggu      121.5597       46.1300           55       206     2012      02        02        033              0.130208     -14.478271       0.000000       0.090025   -9999.000000   -9999.000000       0.070600   -9999.000000
50838     50838     neimenggu      121.5597       46.1300           55       206     2012      02        03        034              0.130542     -13.240906       0.000000       0.090105   -9999.000000   -9999.000000       0.073000       0.052000
50838     50838     neimenggu      121.5597       46.1300           55       206     2012      02        04        035              0.131250     -12.656433       0.000000       0.090156   -9999.000000   -9999.000000       0.070100       0.061000
50838     50838     neimenggu      121.5597       46.1300           55       206     2012      02        05        036              0.132042     -11.439850       0.000000       0.090224   -9999.000000   -9999.000000   -9999.000000   -9999.000000
50838     50838     neimenggu      121.5597       46.1300           55       206     2012      02        06        037              0.132208     -10.775452       0.000000       0.090331   -9999.000000   -9999.000000       0.065700       0.011000
50838     50838     neimenggu      121.5597       46.1300           55       206     2012      02        07        038              0.131292     -12.170563       0.000000       0.090149   -9999.000000   -9999.000000       0.071100   -9999.000000
50838     50838     neimenggu      121.5597       46.1300           55       206     2012      02        08        039              0.131208     -12.833435       0.000000       0.090008   -9999.000000   -9999.000000       0.070900       0.064000
50838     50838     neimenggu      121.5597       46.1300           55       206     2012      02        09        040              0.131333     -12.202026       0.000000       0.090126   -9999.000000   -9999.000000       0.071200       0.035000
50838     50838     neimenggu      121.5597       46.1300           55       206     2012      02        10        041              0.131417     -11.964203       0.000000       0.090086   -9999.000000   -9999.000000       0.072800       0.087000
50838     50838     neimenggu      121.5597       46.1300           55       206     2012      02        11        042              0.131417     -12.580078       0.000000       0.089995   -9999.000000   -9999.000000       0.067400       0.009000
50838     50838     neimenggu      121.5597       46.1300           55       206     2012      02        12        043              0.131708     -12.493378       0.000000       0.090002   -9999.000000   -9999.000000       0.068000       0.019000
50838     50838     neimenggu      121.5597       46.1300           55       206     2012      02        13        044              0.132625     -11.341583       0.000000       0.090176   -9999.000000   -9999.000000       0.073200       0.047000
50838     50838     neimenggu      121.5597       46.1300           55       206     2012      02        14        045              0.132583     -10.441132       0.000000       0.090467   -9999.000000   -9999.000000       0.073100       0.029000
50838     50838     neimenggu      121.5597       46.1300           55       206     2012      02        15        046              0.132708     -11.880707       0.000000       0.090219   -9999.000000   -9999.000000       0.073700       0.085000
50838     50838     neimenggu      121.5597       46.1300           55       206     2012      02        16        047              0.132167     -11.446106       0.000000       0.090100   -9999.000000   -9999.000000   -9999.000000       0.006000
50838     50838     neimenggu      121.5597       46.1300           55       206     2012      02        17        048              0.132000     -11.745972       0.000000       0.089961   -9999.000000   -9999.000000       0.067700       0.024000
50838     50838     neimenggu      121.5597       46.1300           55       206     2012      02        18        049              0.132708     -11.429138       0.000000       0.089988   -9999.000000   -9999.000000   -9999.000000       0.005000
50838     50838     neimenggu      121.5597       46.1300           55       206     2012      02        19        050              0.133750      -9.965820       0.000000       0.090231   -9999.000000   -9999.000000       0.073600       0.019000
50838     50838     neimenggu      121.5597       46.1300           55       206     2012      02        20        051              0.132625      -9.319244       0.000000       0.090651   -9999.000000   -9999.000000       0.072200       0.015000
50838     50838     neimenggu      121.5597       46.1300           55       206     2012      02        21        052              0.132667     -12.241608       0.000000       0.089517   -9999.000000   -9999.000000       0.075400   -9999.000000
50838     50838     neimenggu      121.5597       46.1300           55       206     2012      02        22        053              0.132917     -11.202667       0.000000       0.089267   -9999.000000   -9999.000000   -9999.000000       0.051000
50838     50838     neimenggu      121.5597       46.1300           55       206     2012      02        23        054              0.133833     -10.446960       0.000000       0.089398   -9999.000000   -9999.000000       0.069600       0.033000
50838     50838     neimenggu      121.5597       46.1300           55       206     2012      02        24        055              0.134708      -7.694214       0.000000       0.092334   -9999.000000   -9999.000000       0.075400       0.048000
50838     50838     neimenggu      121.5597       46.1300           55       206     2012      02        25        056              0.134417      -8.239746       0.000000       0.091550   -9999.000000   -9999.000000       0.074000       0.008000
50838     50838     neimenggu      121.5597       46.1300           55       206     2012      02        26        057              0.134083      -9.635864       0.000000       0.089158   -9999.000000   -9999.000000       0.075600   -9999.000000
50838     50838     neimenggu      121.5597       46.1300           55       206     2012      02        27        058              0.135208      -9.531586       0.000000       0.088739   -9999.000000   -9999.000000       0.076400       0.072000
50838     50838     neimenggu      121.5597       46.1300           55       206     2012      02        28        059              0.136667      -6.218567       0.000000       0.103301       0.113000   -9999.000000       0.069900       0.076000
50838     50838     neimenggu      121.5597       46.1300           55       206     2012      02        29        060              0.000000   -9999.000000       0.000000   -9999.000000   -9999.000000   -9999.000000   -9999.000000   -9999.000000
50838     50838     neimenggu      121.5597       46.1300           55       206     2012      03        01        061              0.136917      -3.410370       0.000000       0.128411   -9999.000000   -9999.000000       0.073100       0.013000
50838     50838     neimenggu      121.5597       46.1300           55       206     2012      03        02        062              0.136042      -7.854584       0.000000       0.100167   -9999.000000   -9999.000000       0.071100   -9999.000000
50838     50838     neimenggu      121.5597       46.1300           55       206     2012      03        03        063              0.136292      -8.522278       0.000000       0.095277   -9999.000000   -9999.000000       0.075500       0.034000
50838     50838     neimenggu      121.5597       46.1300           55       206     2012      03        04        064              0.137917      -5.933533       0.632333       0.107594   -9999.000000   -9999.000000   -9999.000000       0.101000
50838     50838     neimenggu      121.5597       46.1300           55       206     2012      03        05        065              0.138000      -4.161438       1.136502       0.115761   -9999.000000   -9999.000000       0.060600   -9999.000000
50838     50838     neimenggu      121.5597       46.1300           55       206     2012      03        06        066              0.137750      -6.042908       0.000000       0.104322   -9999.000000   -9999.000000       0.062100       0.007000
50838     50838     neimenggu      121.5597       46.1300           55       206     2012      03        07        067              0.000000      -6.823608       0.000000       0.108163   -9999.000000   -9999.000000       0.058800   -9999.000000
50838     50838     neimenggu      121.5597       46.1300           55       206     2012      03        08        068              0.137500      -6.919952       0.000000       0.097463   -9999.000000   -9999.000000       0.060500       0.030000
50838     50838     neimenggu      121.5597       46.1300           55       206     2012      03        09        069              0.137500      -8.532501       0.000000       0.094102   -9999.000000   -9999.000000       0.062700       0.011000
50838     50838     neimenggu      121.5597       46.1300           55       206     2012      03        10        070              0.137708      -7.754822       0.498248       0.094405   -9999.000000   -9999.000000   -9999.000000       0.041000
50838     50838     neimenggu      121.5597       46.1300           55       206     2012      03        11        071              0.138042      -8.173096       0.000000       0.096017   -9999.000000   -9999.000000       0.059100       0.012000
50838     50838     neimenggu      121.5597       46.1300           55       206     2012      03        12        072              0.138500      -8.237457       0.000000       0.094481   -9999.000000   -9999.000000       0.068300       0.032000
50838     50838     neimenggu      121.5597       46.1300           55       206     2012      03        13        073              0.139292      -6.551880       0.000000       0.104090   -9999.000000   -9999.000000       0.067000       0.029000
50838     50838     neimenggu      121.5597       46.1300           55       206     2012      03        14        074              0.140417      -4.446472       0.000000       0.121490       0.142000   -9999.000000       0.068600       0.105000
50838     50838     neimenggu      121.5597       46.1300           55       206     2012      03        15        075              0.144708      -3.212433       0.000000       0.133804       0.130000   -9999.000000       0.076900       0.226000
50838     50838     neimenggu      121.5597       46.1300           55       206     2012      03        16        076              0.152542       1.251434       0.000000       0.189512   -9999.000000       0.051500       0.069100       0.149000
50838     50838     neimenggu      121.5597       46.1300           55       206     2012      03        17        077              0.145167       1.959381       0.000000       0.203545       0.134000   -9999.000000       0.061700       0.031000
50838     50838     neimenggu      121.5597       46.1300           55       206     2012      03        18        078              0.142333      -5.540955       0.000000       0.119019   -9999.000000   -9999.000000       0.068300       0.082000
50838     50838     neimenggu      121.5597       46.1300           55       206     2012      03        19        079              0.143625      -4.153534       0.000000       0.118246       0.136000   -9999.000000       0.067400       0.119000
50838     50838     neimenggu      121.5597       46.1300           55       206     2012      03        20        080              0.146625      -3.148285       0.000000       0.137922       0.125000   -9999.000000       0.070900       0.043000
50838     50838     neimenggu      121.5597       46.1300           55       206     2012      03        21        081              0.150042       0.537598       0.000000       0.171970   -9999.000000   -9999.000000   -9999.000000       0.088000
50838     50838     neimenggu      121.5597       46.1300           55       206     2012      03        22        082              0.150500       1.530273       0.000000       0.197147       0.144000   -9999.000000       0.067700       0.121000
50838     50838     neimenggu      121.5597       46.1300           55       206     2012      03        23        083              0.150708       2.535187       2.092056       0.205159   -9999.000000   -9999.000000       0.077200       0.087000
50838     50838     neimenggu      121.5597       46.1300           55       206     2012      03        24        084              0.150125       0.805450       0.000000       0.194602       0.148000   -9999.000000       0.070700       0.181000
50838     50838     neimenggu      121.5597       46.1300           55       206     2012      03        25        085              0.000000       0.713104       0.000000       0.187540       0.145000   -9999.000000       0.070700       0.013000
50838     50838     neimenggu      121.5597       46.1300           55       206     2012      03        26        086              0.150250       1.220093       0.000000       0.192830   -9999.000000       0.011100       0.071700       0.166000
50838     50838     neimenggu      121.5597       46.1300           55       206     2012      03        27        087              0.150083       4.524658       0.000000       0.245120   -9999.000000   -9999.000000   -9999.000000       0.121000
50838     50838     neimenggu      121.5597       46.1300           55       206     2012      03        28        088              0.150708       4.809631       0.000000       0.219005       0.131000   -9999.000000       0.070200       0.174000
50838     50838     neimenggu      121.5597       46.1300           55       206     2012      03        29        089              0.149292       6.989319       0.539744       0.253148   -9999.000000       0.014100       0.081700   -9999.000000
50838     50838     neimenggu      121.5597       46.1300           55       206     2012      03        30        090              0.148542       2.870453       0.000000       0.217620       0.160000   -9999.000000       0.064700       0.054000
50838     50838     neimenggu      121.5597       46.1300           55       206     2012      03        31        091              0.147083       1.299286       0.027967       0.192762   -9999.000000       0.029500       0.064900   -9999.000000
50838     50838     neimenggu      121.5597       46.1300           55       206     2012      04        01        092              0.147500      -1.804932       0.106342       0.159369   -9999.000000   -9999.000000       0.068200       0.069000
50838     50838     neimenggu      121.5597       46.1300           55       206     2012      04        02        093              0.148208      -0.472900       0.000000       0.169548       0.133000   -9999.000000       0.066700       0.198000
50838     50838     neimenggu      121.5597       46.1300           55       206     2012      04        03        094              0.148708       0.630768       0.000000       0.184483       0.149000       0.006200       0.068300   -9999.000000
50838     50838     neimenggu      121.5597       46.1300           55       206     2012      04        04        095              0.148417       1.985962       0.000000       0.204125       0.137000   -9999.000000       0.068000       0.064000
50838     50838     neimenggu      121.5597       46.1300           55       206     2012      04        05        096              0.147583       2.256927       0.000000       0.205740       0.116000       0.025300       0.066700       0.005000
50838     50838     neimenggu      121.5597       46.1300           55       206     2012      04        06        097              0.147625       0.112610       0.000000       0.182023   -9999.000000   -9999.000000       0.070300       0.072000
50838     50838     neimenggu      121.5597       46.1300           55       206     2012      04        07        098              0.148750       1.992889       0.000000       0.198288       0.139000   -9999.000000   -9999.000000       0.261000
50838     50838     neimenggu      121.5597       46.1300           55       206     2012      04        08        099              0.147833       6.182190       0.000000       0.250586       0.152000   -9999.000000       0.071600       0.256000
50838     50838     neimenggu      121.5597       46.1300           55       206     2012      04        09        100              0.149125       4.001373       0.000000       0.228607       0.151000   -9999.000000       0.071200       0.157000
50838     50838     neimenggu      121.5597       46.1300           55       206     2012      04        10        101              0.147583       8.473114       0.068827       0.254887       0.124000       0.009400       0.070100       0.128000
50838     50838     neimenggu      121.5597       46.1300           55       206     2012      04        11        102              0.147542       5.580261       0.000000       0.229093       0.128000       0.008500       0.071700       0.116000
50838     50838     neimenggu      121.5597       46.1300           55       206     2012      04        12        103              0.147625       7.424957       0.000000       0.252988       0.154000   -9999.000000       0.075300       0.261000
50838     50838     neimenggu      121.5597       46.1300           55       206     2012      04        13        104              0.147917       7.865448       0.000000       0.252097       0.135000       0.024800   -9999.000000       0.365000
50838     50838     neimenggu      121.5597       46.1300           55       206     2012      04        14        105              0.146125       9.024994       0.216800       0.238818       0.131000   -9999.000000       0.072000       0.155000
50838     50838     neimenggu      121.5597       46.1300           55       206     2012      04        15        106              0.145792       6.257324       0.000000       0.252138       0.142000   -9999.000000       0.071600       0.143000
50838     50838     neimenggu      121.5597       46.1300           55       206     2012      04        16        107              0.146167       5.076599       0.000000       0.228470   -9999.000000       0.011800       0.073000       0.158000
50838     50838     neimenggu      121.5597       46.1300           55       206     2012      04        17        108              0.146667       7.681763       0.000000       0.249795       0.130000   -9999.000000   -9999.000000       0.292000
50838     50838     neimenggu      121.5597       46.1300           55       206     2012      04        18        109              0.147273      11.470917       0.000000       0.251314       0.122000       0.005700       0.077100       0.138000
50838     50838     neimenggu      121.5597       46.1300           55       206     2012      04        19        110              0.146250      14.730896       0.096320       0.248327       0.141000       0.417100       0.082300       0.295000
50838     50838     neimenggu      121.5597       46.1300           55       206     2012      04        20        111              0.145333      14.408264       0.000000       0.247659       0.142000   -9999.000000   -9999.000000       0.174000
50838     50838     neimenggu      121.5597       46.1300           55       206     2012      04        21        112              0.145583      10.612427       0.000000       0.244356       0.134000       0.107400       0.077200       0.216000
50838     50838     neimenggu      121.5597       46.1300           55       206     2012      04        22        113              0.146625      14.106750       0.000000       0.244646       0.124000       0.097100       0.078600       0.319000
50838     50838     neimenggu      121.5597       46.1300           55       206     2012      04        23        114              0.146250      16.709778       2.125098       0.241335       0.145000       0.071900       0.094000       0.104000
50838     50838     neimenggu      121.5597       46.1300           55       206     2012      04        24        115              0.144417      16.788605       1.671940       0.247695       0.124000       0.193900   -9999.000000       0.186000
50838     50838     neimenggu      121.5597       46.1300           55       206     2012      04        25        116              0.000000      10.553894       0.000000       0.252186       0.136000   -9999.000000       0.068400       0.223000
50838     50838     neimenggu      121.5597       46.1300           55       206     2012      04        26        117              0.143792       8.698578       0.530884       0.241984       0.110000       0.026100       0.070200       0.203000
50838     50838     neimenggu      121.5597       46.1300           55       206     2012      04        27        118              0.142167      10.301025       0.120898       0.246817   -9999.000000   -9999.000000       0.099000   -9999.000000
50838     50838     neimenggu      121.5597       46.1300           55       206     2012      04        28        119              0.142000       7.166046       0.000000       0.251146       0.130000       0.145500       0.075800       0.068000
50838     50838     neimenggu      121.5597       46.1300           55       206     2012      04        29        120              0.143375       6.892181       0.900073       0.249802       0.135000       0.176100       0.076900   -9999.000000
50838     50838     neimenggu      121.5597       46.1300           55       206     2012      04        30        121              0.143958      10.528534       0.000000       0.252617       0.134000   -9999.000000   -9999.000000       0.241000
50838     50838     neimenggu      121.5597       46.1300           55       206     2012      05        01        122              0.144167      13.570251       0.000000       0.247008       0.135000       0.056000       0.070400       0.300000
50838     50838     neimenggu      121.5597       46.1300           55       206     2012      05        02        123              0.144500      13.866058       0.067487       0.243726       0.124000   -9999.000000       0.077800   -9999.000000
50838     50838     neimenggu      121.5597       46.1300           55       206     2012      05        03        124              0.144583      15.654694       0.000000       0.242226       0.135500   -9999.000000       0.072900       0.212000
50838     50838     neimenggu      121.5597       46.1300           55       206     2012      05        04        125              0.143250      17.300751       0.000000       0.236025       0.107000   -9999.000000       0.076300       0.328000
50838     50838     neimenggu      121.5597       46.1300           55       206     2012      05        05        126              0.141958      15.759094       0.000000       0.233067       0.134000   -9999.000000   -9999.000000       0.302000
50838     50838     neimenggu      121.5597       46.1300           55       206     2012      05        06        127              0.141583      15.159149       0.000000       0.230799       0.135500       0.031100       0.069100       0.396000
50838     50838     neimenggu      121.5597       46.1300           55       206     2012      05        07        128              0.141375      15.842804       0.000000       0.227563   -9999.000000   -9999.000000       0.064300       0.466000
50838     50838     neimenggu      121.5597       46.1300           55       206     2012      05        08        129              0.141250      16.540649       0.000000       0.226625       0.126000   -9999.000000       0.069000       0.258000
50838     50838     neimenggu      121.5597       46.1300           55       206     2012      05        09        130              0.140583      17.358185       0.427975       0.225805       0.120000   -9999.000000       0.070200       0.317000
50838     50838     neimenggu      121.5597       46.1300           55       206     2012      05        10        131              0.140875      16.992004       0.000000       0.226533       0.130000   -9999.000000       0.070200       0.264000
50838     50838     neimenggu      121.5597       46.1300           55       206     2012      05        11        132              0.140208      17.498444       0.710720       0.225177       0.171500   -9999.000000   -9999.000000       0.442000
50838     50838     neimenggu      121.5597       46.1300           55       206     2012      05        12        133              0.143208      15.924988      10.972412       0.227755   -9999.000000       0.258900       0.135500       0.621000
50838     50838     neimenggu      121.5597       46.1300           55       206     2012      05        13        134              0.149500      10.695374       0.355143       0.284278   -9999.000000   -9999.000000       0.103700       0.694000
50838     50838     neimenggu      121.5597       46.1300           55       206     2012      05        14        135              0.154458      11.837341       0.373699       0.264913       0.186000       0.196500       0.090300       0.326000
50838     50838     neimenggu      121.5597       46.1300           55       206     2012      05        15        136              0.188333      11.002838       2.262249       0.259671       0.191000       0.256300       0.120100       0.463000
50838     50838     neimenggu      121.5597       46.1300           55       206     2012      05        16        137              0.262583      12.111023       1.899335       0.261016       0.300000       0.146400       0.117800       0.622000
50838     50838     neimenggu      121.5597       46.1300           55       206     2012      05        17        138              0.264708      10.397644       0.000000       0.272133       0.199500       0.330500       0.085300       0.458000
50838     50838     neimenggu      121.5597       46.1300           55       206     2012      05        18        139              0.256042      17.820038       0.000000       0.257491       0.171000       0.127200       0.073100       0.463000
50838     50838     neimenggu      121.5597       46.1300           55       206     2012      05        19        140              0.250667      21.092529       0.000000       0.247056       0.164500       0.086400       0.076600       0.456000
50838     50838     neimenggu      121.5597       46.1300           55       206     2012      05        20        141              0.247833      18.042023       0.000000       0.237488       0.157000       0.243800       0.071600       0.420000
50838     50838     neimenggu      121.5597       46.1300           55       206     2012      05        21        142              0.246042      19.712555       0.000000       0.232751       0.306500   -9999.000000       0.096100       0.505000
50838     50838     neimenggu      121.5597       46.1300           55       206     2012      05        22        143              0.236375      24.115692       0.614328       0.224868       0.315500   -9999.000000   -9999.000000       0.325000
50838     50838     neimenggu      121.5597       46.1300           55       206     2012      05        23        144              0.231958      17.097870       0.000000       0.226938   -9999.000000       0.089800       0.085900       0.311000
50838     50838     neimenggu      121.5597       46.1300           55       206     2012      05        24        145              0.229667      14.917847       0.000000       0.223318   -9999.000000       0.083100       0.088800       0.383000
50838     50838     neimenggu      121.5597       46.1300           55       206     2012      05        25        146              0.000000      15.434601       0.087534       0.221457       0.228000   -9999.000000       0.100700       0.411000
50838     50838     neimenggu      121.5597       46.1300           55       206     2012      05        26        147              0.226333      18.098999       0.000000       0.218699       0.276000   -9999.000000       0.094000   -9999.000000
50838     50838     neimenggu      121.5597       46.1300           55       206     2012      05        27        148              0.223292      18.445740       0.000000       0.216700       0.300500       0.053600       0.095100       0.340000
50838     50838     neimenggu      121.5597       46.1300           55       206     2012      05        28        149              0.218750      20.858551       0.000000       0.211287       0.313000   -9999.000000   -9999.000000   -9999.000000
50838     50838     neimenggu      121.5597       46.1300           55       206     2012      05        29        150              0.212208      20.883636       8.685748       0.207958   -9999.000000       0.077300       0.090100       0.767000
50838     50838     neimenggu      121.5597       46.1300           55       206     2012      05        30        151              0.204583      18.064606       3.370347       0.241024       0.392000       0.212300       0.121600   -9999.000000
50838     50838     neimenggu      121.5597       46.1300           55       206     2012      05        31        152              0.202042      14.288422       0.000000       0.269120       0.276000   -9999.000000       0.092800   -9999.000000
50838     50838     neimenggu      121.5597       46.1300           55       206     2012      06        01        153              0.201292      17.616089       1.892128       0.251779       0.455500       0.117300       0.141400       0.354000
50838     50838     neimenggu      121.5597       46.1300           55       206     2012      06        02        154              0.197958      18.203156      15.440133       0.248860   -9999.000000   -9999.000000       0.182700       0.723000
50838     50838     neimenggu      121.5597       46.1300           55       206     2012      06        03        155              0.218708      15.273682       1.941762       0.296410   -9999.000000       0.360800       0.193300       0.815000
50838     50838     neimenggu      121.5597       46.1300           55       206     2012      06        04        156              0.211750      17.334015       0.217456       0.289504   -9999.000000       0.541000       0.137800       0.806000
50838     50838     neimenggu      121.5597       46.1300           55       206     2012      06        05        157              0.211042      17.592560       0.300153       0.276561       0.489000       0.442400       0.108400       0.687000
50838     50838     neimenggu      121.5597       46.1300           55       206     2012      06        06        158              0.204917      20.767975       2.668239       0.265213   -9999.000000       0.183500       0.130500       0.754000
50838     50838     neimenggu      121.5597       46.1300           55       206     2012      06        07        159              0.201833      18.641937       2.419069       0.272346       0.469000   -9999.000000       0.119200       0.600000
50838     50838     neimenggu      121.5597       46.1300           55       206     2012      06        08        160              0.196458      20.728119       6.056792       0.269380   -9999.000000       0.145900   -9999.000000       0.928000
50838     50838     neimenggu      121.5597       46.1300           55       206     2012      06        09        161              0.190083      18.604431       0.794784       0.282793   -9999.000000       0.253600       0.124500       0.714000
50838     50838     neimenggu      121.5597       46.1300           55       206     2012      06        10        162              0.185417      17.031189       0.000000       0.273678       0.489000       0.484800       0.101200       0.574000
50838     50838     neimenggu      121.5597       46.1300           55       206     2012      06        11        163              0.000000      15.195709      10.627401       0.264576   -9999.000000       0.176100       0.114400       0.448000
50838     50838     neimenggu      121.5597       46.1300           55       206     2012      06        12        164              0.337000      15.857422      21.012846       0.276527   -9999.000000   -9999.000000       0.123000       0.845000
50838     50838     neimenggu      121.5597       46.1300           55       206     2012      06        13        165              0.349167      13.538879      34.773540       0.325486   -9999.000000   -9999.000000       0.118900       1.000000
50838     50838     neimenggu      121.5597       46.1300           55       206     2012      06        14        166              0.327583      14.209290       3.607540       0.341587   -9999.000000       0.436900   -9999.000000       0.870000
50838     50838     neimenggu      121.5597       46.1300           55       206     2012      06        15        167              0.376458      17.250153      20.009365       0.309378   -9999.000000       0.376700       0.119500       0.914000
50838     50838     neimenggu      121.5597       46.1300           55       206     2012      06        16        168              0.362292      15.793732       9.412874       0.330457   -9999.000000       0.422900       0.120900       0.806000
50838     50838     neimenggu      121.5597       46.1300           55       206     2012      06        17        169              0.351667      19.218933       5.025599       0.315170   -9999.000000       0.456600       0.115900       0.774000
50838     50838     neimenggu      121.5597       46.1300           55       206     2012      06        18        170              0.323458      18.743378       0.000000       0.312941   -9999.000000   -9999.000000       0.176700       0.906000
50838     50838     neimenggu      121.5597       46.1300           55       206     2012      06        19        171              0.295833      21.390991       0.000000       0.292524   -9999.000000       0.275300       0.147100       0.769000
50838     50838     neimenggu      121.5597       46.1300           55       206     2012      06        20        172              0.273792      23.334534       0.000000       0.281238   -9999.000000       0.328200       0.119700       0.492000
50838     50838     neimenggu      121.5597       46.1300           55       206     2012      06        21        173              0.256125      23.668762       0.000000       0.273075   -9999.000000       0.151000       0.113400       0.519000
50838     50838     neimenggu      121.5597       46.1300           55       206     2012      06        22        174              0.239292      24.516357       0.000000       0.266626   -9999.000000       0.244200       0.109000       0.430000
50838     50838     neimenggu      121.5597       46.1300           55       206     2012      06        23        175              0.224292      24.004364       0.000000       0.261061   -9999.000000       0.159300       0.105700       0.528000
50838     50838     neimenggu      121.5597       46.1300           55       206     2012      06        24        176              0.257625      24.656830       8.675724       0.257315   -9999.000000       0.147100       0.138200   -9999.000000
50838     50838     neimenggu      121.5597       46.1300           55       206     2012      06        25        177              0.276792      22.376282       5.876095       0.281946   -9999.000000       0.632300   -9999.000000       0.809000
50838     50838     neimenggu      121.5597       46.1300           55       206     2012      06        26        178              0.246292      22.872986       2.015645       0.293297   -9999.000000       0.181800       0.114500   -9999.000000
50838     50838     neimenggu      121.5597       46.1300           55       206     2012      06        27        179              0.255167      24.208832       1.257016       0.283106   -9999.000000       0.371900       0.134600       0.733000
50838     50838     neimenggu      121.5597       46.1300           55       206     2012      06        28        180              0.247375      22.817719      11.346331       0.281599   -9999.000000       0.342100       0.114800       0.777000
50838     50838     neimenggu      121.5597       46.1300           55       206     2012      06        29        181              0.306000      23.326355       4.903235       0.289466   -9999.000000       0.371500       0.125700   -9999.000000
50838     50838     neimenggu      121.5597       46.1300           55       206     2012      06        30        182              0.259250      21.772430       0.212222       0.302969   -9999.000000       0.250700       0.106300   -9999.000000
50838     50838     neimenggu      121.5597       46.1300           55       206     2012      07        01        183              0.282833      24.271759      14.191403       0.280773   -9999.000000   -9999.000000   -9999.000000       0.852000
50838     50838     neimenggu      121.5597       46.1300           55       206     2012      07        02        184              0.335958      18.710358      12.449882       0.308838   -9999.000000       0.391400       0.200300       1.000000
50838     50838     neimenggu      121.5597       46.1300           55       206     2012      07        03        185              0.337458      19.481018      11.301208       0.318981   -9999.000000       0.576900       0.203800       0.986000
50838     50838     neimenggu      121.5597       46.1300           55       206     2012      07        04        186              0.295542      19.916077       1.011443       0.319412   -9999.000000       0.311900       0.160200       0.904000
50838     50838     neimenggu      121.5597       46.1300           55       206     2012      07        05        187              0.265833      23.494965       0.000000       0.294553   -9999.000000       0.286200       0.147100       0.662000
50838     50838     neimenggu      121.5597       46.1300           55       206     2012      07        06        188              0.241250      24.824158       0.000000       0.283070   -9999.000000   -9999.000000       0.145900       0.590000
50838     50838     neimenggu      121.5597       46.1300           55       206     2012      07        07        189              0.211667      25.843201       0.000000       0.274175   -9999.000000       0.143100       0.123200       0.524000
50838     50838     neimenggu      121.5597       46.1300           55       206     2012      07        08        190              0.248167      26.486450      11.016349       0.266592   -9999.000000       0.278600       0.115100       0.719000
50838     50838     neimenggu      121.5597       46.1300           55       206     2012      07        09        191              0.290875      24.868011       2.115244       0.292454   -9999.000000       0.263800       0.170300       0.804000
50838     50838     neimenggu      121.5597       46.1300           55       206     2012      07        10        192              0.264125      25.173065       3.412499       0.282489   -9999.000000       0.310600       0.172400       0.794000
50838     50838     neimenggu      121.5597       46.1300           55       206     2012      07        11        193              0.312792      24.727661      29.538176       0.282172   -9999.000000       0.306500       0.198300       0.948000
50838     50838     neimenggu      121.5597       46.1300           55       206     2012      07        12        194              0.322875      21.742645       0.836406       0.323833   -9999.000000       0.365300   -9999.000000       1.000000
50838     50838     neimenggu      121.5597       46.1300           55       206     2012      07        13        195              0.292708      20.959412       0.756342       0.304322   -9999.000000       0.448800       0.177000       0.897000
50838     50838     neimenggu      121.5597       46.1300           55       206     2012      07        14        196              0.261333      23.545990       0.530104       0.290846   -9999.000000       0.188700       0.159900       0.830000
50838     50838     neimenggu      121.5597       46.1300           55       206     2012      07        15        197              0.227042      24.889191       0.129024       0.280573   -9999.000000       0.208700       0.150300       0.687000
50838     50838     neimenggu      121.5597       46.1300           55       206     2012      07        16        198              0.195333      25.835663       0.000000       0.272935   -9999.000000       0.291500       0.182100       0.650000
50838     50838     neimenggu      121.5597       46.1300           55       206     2012      07        17        199              0.176042      26.649689       0.000000       0.266005   -9999.000000       0.153600       0.175200       0.627000
50838     50838     neimenggu      121.5597       46.1300           55       206     2012      07        18        200              0.167875      27.183228       6.233483       0.258868   -9999.000000   -9999.000000   -9999.000000       0.680000
50838     50838     neimenggu      121.5597       46.1300           55       206     2012      07        19        201              0.162917      25.684662       0.000000       0.258248   -9999.000000   -9999.000000       0.162800       0.558000
50838     50838     neimenggu      121.5597       46.1300           55       206     2012      07        20        202              0.164000      27.148682       1.053602       0.253704   -9999.000000       0.113600       0.167900       0.667000
50838     50838     neimenggu      121.5597       46.1300           55       206     2012      07        21        203              0.187542      26.268341      36.491722       0.257170   -9999.000000       0.107300       0.202700       0.999000
50838     50838     neimenggu      121.5597       46.1300           55       206     2012      07        22        204              0.340458      25.385406      28.829241       0.319570   -9999.000000       0.273800       0.212600       1.000000
50838     50838     neimenggu      121.5597       46.1300           55       206     2012      07        23        205              0.325667      19.679718       1.835927       0.337775   -9999.000000       0.271000   -9999.000000   -9999.000000
50838     50838     neimenggu      121.5597       46.1300           55       206     2012      07        24        206              0.311708      24.175018       2.756264       0.303402   -9999.000000   -9999.000000       0.130900       0.895000
50838     50838     neimenggu      121.5597       46.1300           55       206     2012      07        25        207              0.291250      25.268280      35.969074       0.299167   -9999.000000       0.249200       0.155100   -9999.000000
50838     50838     neimenggu      121.5597       46.1300           55       206     2012      07        26        208              0.275792      26.085022       0.235698       0.327093   -9999.000000       0.380500       0.178300       0.936000
50838     50838     neimenggu      121.5597       46.1300           55       206     2012      07        27        209              0.260833      24.154419       0.228327       0.311424   -9999.000000       0.338800       0.164900       0.928000
50838     50838     neimenggu      121.5597       46.1300           55       206     2012      07        28        210              0.314667      24.751282      41.699490       0.294711   -9999.000000       0.430200       0.194900   -9999.000000
50838     50838     neimenggu      121.5597       46.1300           55       206     2012      07        29        211              0.332625      20.835541       6.202928       0.338679   -9999.000000       0.286700   -9999.000000       0.869000
50838     50838     neimenggu      121.5597       46.1300           55       206     2012      07        30        212              0.311125      18.955627       0.129629       0.322822   -9999.000000       0.254200       0.259600       0.745000
50838     50838     neimenggu      121.5597       46.1300           55       206     2012      07        31        213              0.293708      20.071655       0.579458       0.308575   -9999.000000   -9999.000000       0.247100       0.814000
50838     50838     neimenggu      121.5597       46.1300           55       206     2012      08        01        214              0.277917      21.951538       1.661203       0.302744   -9999.000000       0.406100       0.229800       0.821000
50838     50838     neimenggu      121.5597       46.1300           55       206     2012      08        02        215              0.264917      22.016235       2.330979       0.301218   -9999.000000       0.552100       0.235000       0.728000
50838     50838     neimenggu      121.5597       46.1300           55       206     2012      08        03        216              0.254750      20.574799       0.289516       0.302221   -9999.000000       0.242100       0.226800       0.739000
50838     50838     neimenggu      121.5597       46.1300           55       206     2012      08        04        217              0.245708      21.144714       6.070858       0.299246   -9999.000000       0.223700       0.210900       0.696000
50838     50838     neimenggu      121.5597       46.1300           55       206     2012      08        05        218              0.232833      24.383453       0.000000       0.304993   -9999.000000   -9999.000000       0.205500       0.637000
50838     50838     neimenggu      121.5597       46.1300           55       206     2012      08        06        219              0.217583      25.274323       2.128387       0.295887   -9999.000000   -9999.000000       0.227800       0.760000
50838     50838     neimenggu      121.5597       46.1300           55       206     2012      08        07        220              0.202583      26.048645       1.806798       0.289848   -9999.000000       0.224200   -9999.000000       0.626000
50838     50838     neimenggu      121.5597       46.1300           55       206     2012      08        08        221              0.190833      26.564789       0.000000       0.290171   -9999.000000       0.143200       0.225300       0.608000
50838     50838     neimenggu      121.5597       46.1300           55       206     2012      08        09        222              0.181625      23.358582       2.859124       0.286662   -9999.000000       0.147400   -9999.000000       0.593000
50838     50838     neimenggu      121.5597       46.1300           55       206     2012      08        10        223              0.164792      20.999146       0.620643       0.286295   -9999.000000       0.294600       0.218000       0.808000
50838     50838     neimenggu      121.5597       46.1300           55       206     2012      08        11        224              0.157542      19.800568       0.000000       0.291387   -9999.000000   -9999.000000       0.209500       0.644000
50838     50838     neimenggu      121.5597       46.1300           55       206     2012      08        12        225              0.156458      19.686951       0.015524       0.286412   -9999.000000       0.289500       0.215300       0.530000
50838     50838     neimenggu      121.5597       46.1300           55       206     2012      08        13        226              0.155500      20.288574       2.767142       0.282013   -9999.000000   -9999.000000       0.207800       0.605000
50838     50838     neimenggu      121.5597       46.1300           55       206     2012      08        14        227              0.154708      20.979034       1.247190       0.285008   -9999.000000       0.199100       0.217700       0.673000
50838     50838     neimenggu      121.5597       46.1300           55       206     2012      08        15        228              0.153917      20.755859       0.000000       0.286549   -9999.000000       0.155300   -9999.000000       0.650000
50838     50838     neimenggu      121.5597       46.1300           55       206     2012      08        16        229              0.153292      21.298950       0.000000       0.280111   -9999.000000   -9999.000000       0.197100       0.673000
50838     50838     neimenggu      121.5597       46.1300           55       206     2012      08        17        230              0.152917      22.535889       3.119899       0.276013   -9999.000000       0.141800       0.189200       0.834000
50838     50838     neimenggu      121.5597       46.1300           55       206     2012      08        18        231              0.152208      22.329315       0.047610       0.283111   -9999.000000   -9999.000000       0.208600       0.611000
50838     50838     neimenggu      121.5597       46.1300           55       206     2012      08        19        232              0.152000      20.907043       0.241364       0.276804   -9999.000000       0.154700       0.213300       0.565000
50838     50838     neimenggu      121.5597       46.1300           55       206     2012      08        20        233              0.150917      21.598175       0.220482       0.272333   -9999.000000       0.231200       0.225100       0.609000
50838     50838     neimenggu      121.5597       46.1300           55       206     2012      08        21        234              0.150375      16.640228       0.492672       0.271916   -9999.000000       0.123700       0.204800   -9999.000000
50838     50838     neimenggu      121.5597       46.1300           55       206     2012      08        22        235              0.149875      16.886475       1.409977       0.269160   -9999.000000       0.134400       0.207300   -9999.000000
50838     50838     neimenggu      121.5597       46.1300           55       206     2012      08        23        236              0.149792      17.886627       0.806301       0.267084   -9999.000000   -9999.000000       0.225900   -9999.000000
50838     50838     neimenggu      121.5597       46.1300           55       206     2012      08        24        237              0.149625      20.981964       8.697255       0.263468   -9999.000000   -9999.000000       0.225500   -9999.000000
50838     50838     neimenggu      121.5597       46.1300           55       206     2012      08        25        238              0.000000      22.309906       0.000000       0.291400   -9999.000000       0.253500       0.228600   -9999.000000
50838     50838     neimenggu      121.5597       46.1300           55       206     2012      08        26        239              0.148958      23.432922      63.691669       0.274924   -9999.000000       0.159800   -9999.000000   -9999.000000
50838     50838     neimenggu      121.5597       46.1300           55       206     2012      08        27        240              0.148583      22.703094       0.000000       0.267690   -9999.000000       0.058900       0.182800       0.530000
50838     50838     neimenggu      121.5597       46.1300           55       206     2012      08        28        241              0.148417      23.190735       0.000000       0.264950   -9999.000000       0.041100       0.181400       0.543000
50838     50838     neimenggu      121.5597       46.1300           55       206     2012      08        29        242              0.147750      23.637299       0.000000       0.260921   -9999.000000   -9999.000000       0.185300       0.491000
50838     50838     neimenggu      121.5597       46.1300           55       206     2012      08        30        243              0.147417      21.143768       0.000000       0.256175   -9999.000000       0.169400       0.189300       0.612000
50838     50838     neimenggu      121.5597       46.1300           55       206     2012      08        31        244              0.147833      21.565247       0.000000       0.254119   -9999.000000   -9999.000000       0.196700       0.601000
50838     50838     neimenggu      121.5597       46.1300           55       206     2012      09        01        245              0.147833      23.958130       6.419241       0.252776       0.489000       0.176800   -9999.000000       0.483000
50838     50838     neimenggu      121.5597       46.1300           55       206     2012      09        02        246              0.183833      23.343781      21.593935       0.261250   -9999.000000       0.343700       0.195200       0.850000
50838     50838     neimenggu      121.5597       46.1300           55       206     2012      09        03        247              0.188917      16.422821       0.680092       0.321611   -9999.000000   -9999.000000       0.191600       0.850000
50838     50838     neimenggu      121.5597       46.1300           55       206     2012      09        04        248              0.183542      16.055511       0.603027       0.294911   -9999.000000       0.365700       0.167500       0.854000
50838     50838     neimenggu      121.5597       46.1300           55       206     2012      09        05        249              0.179875      15.434814       0.060201       0.289305   -9999.000000       0.662800       0.166900       0.762000
50838     50838     neimenggu      121.5597       46.1300           55       206     2012      09        06        250              0.176542      15.463135       0.000000       0.281414   -9999.000000       0.334500       0.168100       0.607000
50838     50838     neimenggu      121.5597       46.1300           55       206     2012      09        07        251              0.174292      17.584961       0.000000       0.275215   -9999.000000       0.306100       0.169100       0.551000
50838     50838     neimenggu      121.5597       46.1300           55       206     2012      09        08        252              0.172333      19.258972       0.675422       0.271740   -9999.000000       0.217800       0.162700       0.773000
50838     50838     neimenggu      121.5597       46.1300           55       206     2012      09        09        253              0.170083      20.311737       0.000000       0.268970   -9999.000000       0.142000       0.158200       0.670000
50838     50838     neimenggu      121.5597       46.1300           55       206     2012      09        10        254              0.182458      20.126526      23.644203       0.265341   -9999.000000       0.350000       0.176700       0.635000
50838     50838     neimenggu      121.5597       46.1300           55       206     2012      09        11        255              0.210625      19.668060       5.708155       0.299312   -9999.000000   -9999.000000       0.193100       0.777000
50838     50838     neimenggu      121.5597       46.1300           55       206     2012      09        12        256              0.208375      14.718689       2.077856       0.311437   -9999.000000       0.174800   -9999.000000       0.750000
50838     50838     neimenggu      121.5597       46.1300           55       206     2012      09        13        257              0.204833      12.633850       1.476075       0.300621   -9999.000000       0.441200       0.187000       0.894000
50838     50838     neimenggu      121.5597       46.1300           55       206     2012      09        14        258              0.199500      13.136108       0.000000       0.295803   -9999.000000       0.168300       0.212500       0.729000
50838     50838     neimenggu      121.5597       46.1300           55       206     2012      09        15        259              0.193667      15.233215       0.000000       0.285771   -9999.000000       0.294900       0.172300       0.712000
50838     50838     neimenggu      121.5597       46.1300           55       206     2012      09        16        260              0.189000      16.329498       0.000000       0.280217       0.490000   -9999.000000       0.170200       0.602000
50838     50838     neimenggu      121.5597       46.1300           55       206     2012      09        17        261              0.184917      16.729248       0.000000       0.276043       0.489000       0.209800       0.152100       0.573000
50838     50838     neimenggu      121.5597       46.1300           55       206     2012      09        18        262              0.181250      16.627319       0.680265       0.272664       0.490000       0.398400       0.148700       0.687000
50838     50838     neimenggu      121.5597       46.1300           55       206     2012      09        19        263              0.178250      16.852875       0.582189       0.272189       0.489000       0.236600       0.149100   -9999.000000
50838     50838     neimenggu      121.5597       46.1300           55       206     2012      09        20        264              0.175458      16.649567       0.000000       0.272256       0.489000       0.161900       0.164200       0.583000
50838     50838     neimenggu      121.5597       46.1300           55       206     2012      09        21        265              0.172750      17.125092       1.658789       0.268640   -9999.000000   -9999.000000       0.150900   -9999.000000
50838     50838     neimenggu      121.5597       46.1300           55       206     2012      09        22        266              0.170667      17.514893       3.168367       0.272727       0.312500       0.163100       0.151100       0.649000
50838     50838     neimenggu      121.5597       46.1300           55       206     2012      09        23        267              0.169000      16.668030       0.000000       0.280437       0.337500       0.467800   -9999.000000       0.692000
50838     50838     neimenggu      121.5597       46.1300           55       206     2012      09        24        268              0.167125      16.329865       0.707632       0.274739       0.310000       0.261000       0.136900   -9999.000000
50838     50838     neimenggu      121.5597       46.1300           55       206     2012      09        25        269              0.170083      15.115265      11.751379       0.273064       0.351000       0.537000       0.135600       0.859000
50838     50838     neimenggu      121.5597       46.1300           55       206     2012      09        26        270              0.173667      12.815338       0.344438       0.305701       0.393000       0.295600       0.136700       0.509000
50838     50838     neimenggu      121.5597       46.1300           55       206     2012      09        27        271              0.203214      12.572784      21.758949       0.287312       0.405000       0.278500       0.151300       0.871000
50838     50838     neimenggu      121.5597       46.1300           55       206     2012      09        28        272              0.211867      10.054810       0.306388       0.324078       0.409000   -9999.000000       0.165300       0.788000
50838     50838     neimenggu      121.5597       46.1300           55       206     2012      09        29        273              0.203500      10.694153       0.000000       0.301364   -9999.000000   -9999.000000   -9999.000000       0.731000
50838     50838     neimenggu      121.5597       46.1300           55       206     2012      09        30        274              0.197542      10.531708       0.000000       0.290886       0.380500   -9999.000000       0.171700       0.666000
50838     50838     neimenggu      121.5597       46.1300           55       206     2012      10        01        275              0.193417      11.340149       0.065391       0.285837       0.279000   -9999.000000       0.146500       0.555000
50838     50838     neimenggu      121.5597       46.1300           55       206     2012      10        02        276              0.190583      12.686554       1.679795       0.282165       0.264000       0.105200       0.113400       0.720000
50838     50838     neimenggu      121.5597       46.1300           55       206     2012      10        03        277              0.189542      13.860321      29.663733       0.284297       0.285500       0.317800       0.123300       0.846000
50838     50838     neimenggu      121.5597       46.1300           55       206     2012      10        04        278              0.189375      10.989075       0.000000       0.334135   -9999.000000   -9999.000000       0.149000       0.790000
50838     50838     neimenggu      121.5597       46.1300           55       206     2012      10        05        279              0.185625      11.887146       0.000000       0.302851   -9999.000000       0.288100       0.159900       0.607000
50838     50838     neimenggu      121.5597       46.1300           55       206     2012      10        06        280              0.183208      10.096436       0.000000       0.292507       0.287000       0.335200       0.154700       0.549000
50838     50838     neimenggu      121.5597       46.1300           55       206     2012      10        07        281              0.181542      10.391541       0.059588       0.288404       0.319000       0.272700       0.125900       0.881000
50838     50838     neimenggu      121.5597       46.1300           55       206     2012      10        08        282              0.180458      11.100311       4.621302       0.286179       0.317000       0.242400       0.089800       0.632000
50838     50838     neimenggu      121.5597       46.1300           55       206     2012      10        09        283              0.178875      13.119507       0.229431       0.292267       0.312000   -9999.000000       0.118100       0.776000
50838     50838     neimenggu      121.5597       46.1300           55       206     2012      10        10        284              0.176708       9.341431       0.000000       0.293386   -9999.000000       0.308000   -9999.000000       0.453000
50838     50838     neimenggu      121.5597       46.1300           55       206     2012      10        11        285              0.175792       6.487762       0.000000       0.285890       0.259000       0.359600       0.123800       0.553000
50838     50838     neimenggu      121.5597       46.1300           55       206     2012      10        12        286              0.174833       7.722717       2.334505       0.284861       0.235000       0.280300       0.118800       0.682000
50838     50838     neimenggu      121.5597       46.1300           55       206     2012      10        13        287              0.173875       6.116943       0.000000       0.290080   -9999.000000       0.240200       0.112100       0.625000
50838     50838     neimenggu      121.5597       46.1300           55       206     2012      10        14        288              0.173125       4.496368       0.000000       0.287450       0.287000       0.235800       0.111400       0.676000
50838     50838     neimenggu      121.5597       46.1300           55       206     2012      10        15        289              0.172625       5.548065       2.408937       0.284504       0.246000       0.230900       0.090400       0.495000
50838     50838     neimenggu      121.5597       46.1300           55       206     2012      10        16        290              0.197708       6.548492       5.744116       0.288645   -9999.000000   -9999.000000   -9999.000000       0.779000
50838     50838     neimenggu      121.5597       46.1300           55       206     2012      10        17        291              0.197333       2.704285       0.704789       0.295606   -9999.000000   -9999.000000       0.098900       0.828000
50838     50838     neimenggu      121.5597       46.1300           55       206     2012      10        18        292              0.193250       2.249573       0.000000       0.273215   -9999.000000       0.224600       0.092200   -9999.000000
50838     50838     neimenggu      121.5597       46.1300           55       206     2012      10        19        293              0.191125       1.943604       0.000000       0.254423       0.257000   -9999.000000       0.073900       0.525000
50838     50838     neimenggu      121.5597       46.1300           55       206     2012      10        20        294              0.188667       2.462250       0.000000       0.258038   -9999.000000   -9999.000000       0.076200   -9999.000000
50838     50838     neimenggu      121.5597       46.1300           55       206     2012      10        21        295              0.186250       1.155792       0.000000       0.225711   -9999.000000       0.339000       0.078800       0.359000
50838     50838     neimenggu      121.5597       46.1300           55       206     2012      10        22        296              0.185250       0.561951       0.000000       0.206735   -9999.000000   -9999.000000       0.085100       0.513000
50838     50838     neimenggu      121.5597       46.1300           55       206     2012      10        23        297              0.184750       1.706268       0.000000       0.239442   -9999.000000       0.266600       0.087200   -9999.000000
50838     50838     neimenggu      121.5597       46.1300           55       206     2012      10        24        298              0.184083       3.414276       0.000000       0.272843   -9999.000000       0.150300       0.074200       0.508000
50838     50838     neimenggu      121.5597       46.1300           55       206     2012      10        25        299              0.000000       4.214905       0.000000       0.276003   -9999.000000       0.273800       0.074400       0.445000
50838     50838     neimenggu      121.5597       46.1300           55       206     2012      10        26        300              0.182875       5.149506       0.826943       0.279524       0.203000       0.222600       0.087200       0.531000
50838     50838     neimenggu      121.5597       46.1300           55       206     2012      10        27        301              0.182000       7.340912       0.000000       0.282154       0.216000   -9999.000000   -9999.000000       0.534000
50838     50838     neimenggu      121.5597       46.1300           55       206     2012      10        28        302              0.000000       4.845459       0.000000       0.268645   -9999.000000       0.506200       0.074200       0.394000
50838     50838     neimenggu      121.5597       46.1300           55       206     2012      10        29        303              0.178625       1.442780       0.000000       0.225321   -9999.000000       0.155500       0.068000       0.178000
50838     50838     neimenggu      121.5597       46.1300           55       206     2012      10        30        304              0.176917      -1.001953       0.000000       0.166694   -9999.000000   -9999.000000       0.059300       0.123000
50838     50838     neimenggu      121.5597       46.1300           55       206     2012      10        31        305              0.174833      -2.774414       0.000000       0.125515   -9999.000000       0.104000       0.060100       0.143000
50838     50838     neimenggu      121.5597       46.1300           55       206     2012      11        01        306              0.173125      -2.756531       0.000000       0.132217   -9999.000000       0.092700       0.063700       0.252000
50838     50838     neimenggu      121.5597       46.1300           55       206     2012      11        02        307              0.174500      -1.921356       0.000000       0.130840   -9999.000000       0.081200   -9999.000000       0.202000
50838     50838     neimenggu      121.5597       46.1300           55       206     2012      11        03        308              0.175708      -1.057404       0.000000       0.140798   -9999.000000   -9999.000000       0.066800       0.171000
50838     50838     neimenggu      121.5597       46.1300           55       206     2012      11        04        309              0.175625      -1.135284       0.549942       0.137984   -9999.000000       0.086800       0.063100       0.164000
50838     50838     neimenggu      121.5597       46.1300           55       206     2012      11        05        310              0.174833      -0.979950       0.000000       0.139049       0.175000       0.373600       0.057800       0.320000
50838     50838     neimenggu      121.5597       46.1300           55       206     2012      11        06        311              0.172917      -1.476837       0.000000       0.153962   -9999.000000       0.168600       0.060200       0.201000
50838     50838     neimenggu      121.5597       46.1300           55       206     2012      11        07        312              0.171000      -1.976379       0.000000       0.142597       0.179000       0.103300       0.063800       0.179000
50838     50838     neimenggu      121.5597       46.1300           55       206     2012      11        08        313              0.171542      -0.391266       0.000000       0.156867       0.181000       0.206500   -9999.000000       0.115000
50838     50838     neimenggu      121.5597       46.1300           55       206     2012      11        09        314              0.167958      -1.386902       0.000000       0.158760       0.179000   -9999.000000       0.061300       0.182000
50838     50838     neimenggu      121.5597       46.1300           55       206     2012      11        10        315              0.167875      -1.078186       0.698447       0.146221   -9999.000000       0.090300       0.056800       0.240000
50838     50838     neimenggu      121.5597       46.1300           55       206     2012      11        11        316              0.171792      -0.756592       0.066172       0.145801   -9999.000000   -9999.000000       0.059400       0.126000
50838     50838     neimenggu      121.5597       46.1300           55       206     2012      11        12        317              0.172708      -1.357941       0.138392       0.135336   -9999.000000   -9999.000000       0.057400       0.068000
50838     50838     neimenggu      121.5597       46.1300           55       206     2012      11        13        318              0.000000      -1.570709       0.299265       0.138372   -9999.000000       0.057800   -9999.000000       0.015000
50838     50838     neimenggu      121.5597       46.1300           55       206     2012      11        14        319              0.170708      -2.857452       0.000000       0.115753   -9999.000000   -9999.000000       0.055000       0.069000
50838     50838     neimenggu      121.5597       46.1300           55       206     2012      11        15        320              0.165333      -3.094208       0.000000       0.124528   -9999.000000       0.147500       0.057400       0.107000
50838     50838     neimenggu      121.5597       46.1300           55       206     2012      11        16        321              0.163571      -2.829315       0.000000       0.119038   -9999.000000       0.093500       0.055700   -9999.000000
50838     50838     neimenggu      121.5597       46.1300           55       206     2012      11        17        322              0.000000      -4.377014       0.000000       0.112372   -9999.000000   -9999.000000       0.055100       0.156000
50838     50838     neimenggu      121.5597       46.1300           55       206     2012      11        18        323              0.152167      -5.338226       3.519327       0.106028   -9999.000000   -9999.000000       0.053800   -9999.000000
50838     50838     neimenggu      121.5597       46.1300           55       206     2012      11        19        324              0.153250      -4.113495       1.987410       0.100795   -9999.000000   -9999.000000       0.043600   -9999.000000
50838     50838     neimenggu      121.5597       46.1300           55       206     2012      11        20        325              0.152833      -3.267700       0.269099       0.101810   -9999.000000   -9999.000000       0.043500       0.037000
50838     50838     neimenggu      121.5597       46.1300           55       206     2012      11        21        326              0.153292      -3.440338       0.379888       0.102107   -9999.000000       0.151000       0.044900   -9999.000000
50838     50838     neimenggu      121.5597       46.1300           55       206     2012      11        22        327              0.152208      -4.026764       0.000000       0.104499   -9999.000000       0.038900       0.046600       0.003000
50838     50838     neimenggu      121.5597       46.1300           55       206     2012      11        23        328              0.150792      -5.978027       0.000000       0.101332   -9999.000000       0.204700       0.047600       0.002000
50838     50838     neimenggu      121.5597       46.1300           55       206     2012      11        24        329              0.149542      -7.521301       0.000000       0.099284   -9999.000000   -9999.000000   -9999.000000       0.039000
50838     50838     neimenggu      121.5597       46.1300           55       206     2012      11        25        330              0.149042      -8.350708       0.000000       0.097361   -9999.000000   -9999.000000       0.044600       0.049000
50838     50838     neimenggu      121.5597       46.1300           55       206     2012      11        26        331              0.148167      -8.089996       0.000000       0.096855   -9999.000000   -9999.000000       0.045500   -9999.000000
50838     50838     neimenggu      121.5597       46.1300           55       206     2012      11        27        332              0.147667      -9.078033       1.076521       0.096243   -9999.000000   -9999.000000       0.045500       0.053000
50838     50838     neimenggu      121.5597       46.1300           55       206     2012      11        28        333              0.147458      -8.215637       0.000000       0.095997   -9999.000000   -9999.000000       0.045700       0.030000
50838     50838     neimenggu      121.5597       46.1300           55       206     2012      11        29        334              0.146958      -6.914917       0.000000       0.096565   -9999.000000   -9999.000000       0.045900       0.009000
50838     50838     neimenggu      121.5597       46.1300           55       206     2012      11        30        335              0.145875      -7.124542       0.000000       0.096694   -9999.000000   -9999.000000   -9999.000000   -9999.000000
50838     50838     neimenggu      121.5597       46.1300           55       206     2012      12        01        336              0.145750      -8.496094       0.297721       0.096392   -9999.000000   -9999.000000       0.044600       0.010000
50838     50838     neimenggu      121.5597       46.1300           55       206     2012      12        02        337              0.146125      -8.670990       0.269222       0.096072   -9999.000000   -9999.000000       0.050000       0.032000
50838     50838     neimenggu      121.5597       46.1300           55       206     2012      12        03        338              0.145750      -7.927734       0.000000       0.096156   -9999.000000   -9999.000000       0.043400       0.003000
50838     50838     neimenggu      121.5597       46.1300           55       206     2012      12        04        339              0.145208      -8.090668       0.000000       0.096198   -9999.000000   -9999.000000       0.041500       0.006000
50838     50838     neimenggu      121.5597       46.1300           55       206     2012      12        05        340              0.144875      -8.494110       0.000000       0.096176   -9999.000000   -9999.000000       0.042900   -9999.000000
50838     50838     neimenggu      121.5597       46.1300           55       206     2012      12        06        341              0.144292      -9.927521       0.000000       0.095703   -9999.000000   -9999.000000       0.041900       0.010000
50838     50838     neimenggu      121.5597       46.1300           55       206     2012      12        07        342              0.143833     -11.459381       0.000000       0.094520   -9999.000000   -9999.000000       0.040400   -9999.000000
50838     50838     neimenggu      121.5597       46.1300           55       206     2012      12        08        343              0.143833     -13.138916       0.000000       0.093186   -9999.000000   -9999.000000       0.044200       0.037000
50838     50838     neimenggu      121.5597       46.1300           55       206     2012      12        09        344              0.144833     -11.526611       0.000000       0.092953   -9999.000000   -9999.000000       0.042700       0.023000
50838     50838     neimenggu      121.5597       46.1300           55       206     2012      12        10        345              0.144583     -10.329895       0.000000       0.093044   -9999.000000   -9999.000000       0.040900   -9999.000000
50838     50838     neimenggu      121.5597       46.1300           55       206     2012      12        11        346              0.144125     -11.960327       0.000000       0.092179   -9999.000000   -9999.000000   -9999.000000       0.030000
50838     50838     neimenggu      121.5597       46.1300           55       206     2012      12        12        347              0.144000     -12.882477       0.000000       0.090905   -9999.000000   -9999.000000       0.041000   -9999.000000
50838     50838     neimenggu      121.5597       46.1300           55       206     2012      12        13        348              0.144000     -12.651550       0.000000       0.090222   -9999.000000   -9999.000000       0.042100       0.019000
50838     50838     neimenggu      121.5597       46.1300           55       206     2012      12        14        349              0.144000     -12.473724       3.117656       0.090479   -9999.000000   -9999.000000       0.039400       0.072000
50838     50838     neimenggu      121.5597       46.1300           55       206     2012      12        15        350              0.000000     -12.389130       1.447672       0.090115   -9999.000000   -9999.000000       0.040200   -9999.000000
50838     50838     neimenggu      121.5597       46.1300           55       206     2012      12        16        351              0.143667     -10.338043       0.000000       0.090275   -9999.000000   -9999.000000       0.037100   -9999.000000
50838     50838     neimenggu      121.5597       46.1300           55       206     2012      12        17        352              0.143417      -8.903107       0.000000       0.090335   -9999.000000   -9999.000000   -9999.000000   -9999.000000
50838     50838     neimenggu      121.5597       46.1300           55       206     2012      12        18        353              0.143000      -7.989868       0.000000       0.090361   -9999.000000   -9999.000000       0.038600       0.027000
50838     50838     neimenggu      121.5597       46.1300           55       206     2012      12        19        354              0.143000      -7.797760       0.000000       0.090373   -9999.000000   -9999.000000       0.039400   -9999.000000
50838     50838     neimenggu      121.5597       46.1300           55       206     2012      12        20        355              0.000000      -7.772217       0.000000       0.090377   -9999.000000   -9999.000000       0.037500   -9999.000000
50838     50838     neimenggu      121.5597       46.1300           55       206     2012      12        21        356              0.143333      -7.606598       0.000000       0.090377   -9999.000000   -9999.000000       0.034600       0.043000
50838     50838     neimenggu      121.5597       46.1300           55       206     2012      12        22        357              0.142958      -7.588989       0.000000       0.090375   -9999.000000   -9999.000000       0.035500       0.023000
50838     50838     neimenggu      121.5597       46.1300           55       206     2012      12        23        358              0.142542      -8.992279       0.000000       0.090371   -9999.000000   -9999.000000   -9999.000000       0.049000
50838     50838     neimenggu      121.5597       46.1300           55       206     2012      12        24        359              0.142368     -10.507080       0.000000       0.090328   -9999.000000   -9999.000000       0.037600       0.058000
50838     50838     neimenggu      121.5597       46.1300           55       206     2012      12        25        360              0.142000     -11.052795       0.000000       0.090287   -9999.000000   -9999.000000       0.035900       0.051000
50838     50838     neimenggu      121.5597       46.1300           55       206     2012      12        26        361              0.000000     -11.926666       0.000000       0.090258   -9999.000000   -9999.000000       0.036600       0.015000
50838     50838     neimenggu      121.5597       46.1300           55       206     2012      12        27        362              0.141857     -12.558716       0.000000       0.090165   -9999.000000   -9999.000000       0.036300       0.075000
50838     50838     neimenggu      121.5597       46.1300           55       206     2012      12        28        363              0.000000     -12.666718       4.387990       0.090181   -9999.000000   -9999.000000   -9999.000000       0.023000
50838     50838     neimenggu      121.5597       46.1300           55       206     2012      12        29        364              0.000000     -11.384247       0.943713       0.090208   -9999.000000   -9999.000000   -9999.000000       0.018000
50838     50838     neimenggu      121.5597       46.1300           55       206     2012      12        30        365              0.000000      -9.402863       0.000000       0.090245   -9999.000000   -9999.000000       0.035400       0.014000
50838     50838     neimenggu      121.5597       46.1300           55       206     2012      12        31        366              0.142000      -8.407990       0.000000       0.090263   -9999.000000   -9999.000000       0.030600       0.039000
