# Supplementary material for: Research on Fusing Multisatellite Soil Moisture Data Based on Bayesian Model Averaging
Source: Hindawi journal article supplement (doi:10.1155/2018/9310838), 2018-06-25
Supplement: f1 [file 9310838.f1.zip › 2012_sm00-10cm_daily_ZDB_ZHY_50934_366days_allin.txt]

50934     50934     neimenggu      121.5697       45.3800           58       206     2012      01        01        001              0.000000   -9999.000000       0.000000   -9999.000000   -9999.000000   -9999.000000       0.077800   -9999.000000
50934     50934     neimenggu      121.5697       45.3800           58       206     2012      01        02        002              0.038083     -13.271576       0.000000       0.131894   -9999.000000   -9999.000000   -9999.000000   -9999.000000
50934     50934     neimenggu      121.5697       45.3800           58       206     2012      01        03        003              0.000000     -12.936188       0.000000       0.132039   -9999.000000   -9999.000000       0.057200       0.037000
50934     50934     neimenggu      121.5697       45.3800           58       206     2012      01        04        004              0.037542     -12.688751       0.000000       0.132105   -9999.000000   -9999.000000       0.077300   -9999.000000
50934     50934     neimenggu      121.5697       45.3800           58       206     2012      01        05        005              0.036917     -12.662872       0.000000       0.132141   -9999.000000   -9999.000000       0.066600       0.098000
50934     50934     neimenggu      121.5697       45.3800           58       206     2012      01        06        006              0.036417     -13.117188       0.000000       0.132061   -9999.000000   -9999.000000       0.070100       0.017000
50934     50934     neimenggu      121.5697       45.3800           58       206     2012      01        07        007              0.036167     -13.441925       0.000000       0.131951   -9999.000000   -9999.000000       0.075600   -9999.000000
50934     50934     neimenggu      121.5697       45.3800           58       206     2012      01        08        008              0.000000     -13.384216       0.000000       0.131938   -9999.000000   -9999.000000       0.062800       0.029000
50934     50934     neimenggu      121.5697       45.3800           58       206     2012      01        09        009              0.035458     -13.752594       0.000000       0.131914   -9999.000000   -9999.000000       0.067300       0.043000
50934     50934     neimenggu      121.5697       45.3800           58       206     2012      01        10        010              0.035958     -14.396545       0.000000       0.131722   -9999.000000   -9999.000000   -9999.000000       0.004000
50934     50934     neimenggu      121.5697       45.3800           58       206     2012      01        11        011              0.035625     -16.315460       0.000000       0.131429   -9999.000000   -9999.000000       0.061700   -9999.000000
50934     50934     neimenggu      121.5697       45.3800           58       206     2012      01        12        012              0.036792     -15.727173       0.000000       0.131319   -9999.000000   -9999.000000       0.068900       0.005000
50934     50934     neimenggu      121.5697       45.3800           58       206     2012      01        13        013              0.037167     -13.401672       0.000000       0.131784   -9999.000000   -9999.000000       0.069900       0.003000
50934     50934     neimenggu      121.5697       45.3800           58       206     2012      01        14        014              0.037042     -12.316193       0.000000       0.132013   -9999.000000   -9999.000000       0.059400       0.042000
50934     50934     neimenggu      121.5697       45.3800           58       206     2012      01        15        015              0.036625     -12.851196       0.000000       0.131777   -9999.000000   -9999.000000       0.064400   -9999.000000
50934     50934     neimenggu      121.5697       45.3800           58       206     2012      01        16        016              0.036375     -12.196716       0.000000       0.131533   -9999.000000   -9999.000000       0.085200       0.019000
50934     50934     neimenggu      121.5697       45.3800           58       206     2012      01        17        017              0.000000     -14.182556       0.000000       0.131046   -9999.000000   -9999.000000       0.073400       0.034000
50934     50934     neimenggu      121.5697       45.3800           58       206     2012      01        18        018              0.036042     -15.052429       0.000000       0.130508   -9999.000000   -9999.000000       0.081300       0.008000
50934     50934     neimenggu      121.5697       45.3800           58       206     2012      01        19        019              0.036125     -13.927246       0.000000       0.130660   -9999.000000   -9999.000000   -9999.000000       0.017000
50934     50934     neimenggu      121.5697       45.3800           58       206     2012      01        20        020              0.035167     -14.553467       0.000000       0.130615   -9999.000000   -9999.000000       0.067800   -9999.000000
50934     50934     neimenggu      121.5697       45.3800           58       206     2012      01        21        021              0.034167     -17.905151       0.000000       0.129835   -9999.000000   -9999.000000       0.087000       0.022000
50934     50934     neimenggu      121.5697       45.3800           58       206     2012      01        22        022              0.033917     -18.899216       0.000000       0.129367   -9999.000000   -9999.000000       0.077300       0.008000
50934     50934     neimenggu      121.5697       45.3800           58       206     2012      01        23        023              0.033417     -18.542908       0.000000       0.129347   -9999.000000   -9999.000000       0.079800   -9999.000000
50934     50934     neimenggu      121.5697       45.3800           58       206     2012      01        24        024              0.033500     -17.686249       0.000000       0.129338   -9999.000000   -9999.000000       0.084200       0.030000
50934     50934     neimenggu      121.5697       45.3800           58       206     2012      01        25        025              0.034125     -18.152206       0.000000       0.129400   -9999.000000   -9999.000000       0.074700   -9999.000000
50934     50934     neimenggu      121.5697       45.3800           58       206     2012      01        26        026              0.034125     -16.084778       0.000000       0.129666   -9999.000000   -9999.000000       0.077700       0.018000
50934     50934     neimenggu      121.5697       45.3800           58       206     2012      01        27        027              0.033583     -16.355591       0.000000       0.129691   -9999.000000   -9999.000000       0.088000       0.009000
50934     50934     neimenggu      121.5697       45.3800           58       206     2012      01        28        028              0.033083     -17.262848       0.000000       0.129297   -9999.000000   -9999.000000       0.076800   -9999.000000
50934     50934     neimenggu      121.5697       45.3800           58       206     2012      01        29        029              0.032958     -16.771484       0.000000       0.129396   -9999.000000   -9999.000000       0.090800       0.034000
50934     50934     neimenggu      121.5697       45.3800           58       206     2012      01        30        030              0.032417     -18.231293       0.000000       0.129044   -9999.000000   -9999.000000   -9999.000000       0.035000
50934     50934     neimenggu      121.5697       45.3800           58       206     2012      01        31        031              0.031917     -19.601166       0.000000       0.128700   -9999.000000   -9999.000000       0.067900   -9999.000000
50934     50934     neimenggu      121.5697       45.3800           58       206     2012      02        01        032              0.032292     -19.480438       0.000000       0.128614   -9999.000000   -9999.000000   -9999.000000   -9999.000000
50934     50934     neimenggu      121.5697       45.3800           58       206     2012      02        02        033              0.033875     -18.409805       0.000000       0.128945   -9999.000000   -9999.000000       0.091800   -9999.000000
50934     50934     neimenggu      121.5697       45.3800           58       206     2012      02        03        034              0.034708     -15.114288       0.000000       0.129777   -9999.000000   -9999.000000       0.081800       0.038000
50934     50934     neimenggu      121.5697       45.3800           58       206     2012      02        04        035              0.036375     -14.574799       0.000000       0.130074   -9999.000000   -9999.000000       0.085600       0.022000
50934     50934     neimenggu      121.5697       45.3800           58       206     2012      02        05        036              0.038500     -11.436981       0.000000       0.130721   -9999.000000   -9999.000000   -9999.000000   -9999.000000
50934     50934     neimenggu      121.5697       45.3800           58       206     2012      02        06        037              0.038125      -9.949432       0.000000       0.131057   -9999.000000   -9999.000000       0.073200   -9999.000000
50934     50934     neimenggu      121.5697       45.3800           58       206     2012      02        07        038              0.036083     -15.015015       0.000000       0.129766   -9999.000000   -9999.000000       0.087300       0.005000
50934     50934     neimenggu      121.5697       45.3800           58       206     2012      02        08        039              0.037167     -15.179199       0.000000       0.129256   -9999.000000   -9999.000000       0.082200   -9999.000000
50934     50934     neimenggu      121.5697       45.3800           58       206     2012      02        09        040              0.037458     -13.463959       0.000000       0.129810   -9999.000000   -9999.000000       0.084700       0.017000
50934     50934     neimenggu      121.5697       45.3800           58       206     2012      02        10        041              0.036792     -12.923798       0.000000       0.129700   -9999.000000   -9999.000000       0.090700   -9999.000000
50934     50934     neimenggu      121.5697       45.3800           58       206     2012      02        11        042              0.036542     -13.394196       0.000000       0.129411   -9999.000000   -9999.000000       0.070800   -9999.000000
50934     50934     neimenggu      121.5697       45.3800           58       206     2012      02        12        043              0.037583     -13.257538       0.000000       0.129437   -9999.000000   -9999.000000       0.076700       0.023000
50934     50934     neimenggu      121.5697       45.3800           58       206     2012      02        13        044              0.040167     -10.051086       0.000000       0.129871   -9999.000000   -9999.000000       0.087800   -9999.000000
50934     50934     neimenggu      121.5697       45.3800           58       206     2012      02        14        045              0.039500      -9.862671       0.000000       0.130392   -9999.000000   -9999.000000       0.080300       0.027000
50934     50934     neimenggu      121.5697       45.3800           58       206     2012      02        15        046              0.039000     -12.487854       0.000000       0.129590   -9999.000000   -9999.000000       0.086800       0.004000
50934     50934     neimenggu      121.5697       45.3800           58       206     2012      02        16        047              0.038625     -11.594025       0.000000       0.129240   -9999.000000   -9999.000000   -9999.000000   -9999.000000
50934     50934     neimenggu      121.5697       45.3800           58       206     2012      02        17        048              0.038500     -12.723480       0.000000       0.128726   -9999.000000   -9999.000000       0.075500       0.001000
50934     50934     neimenggu      121.5697       45.3800           58       206     2012      02        18        049              0.039917     -12.240631       0.000000       0.128754   -9999.000000   -9999.000000   -9999.000000   -9999.000000
50934     50934     neimenggu      121.5697       45.3800           58       206     2012      02        19        050              0.041417      -9.542145       0.000000       0.129575   -9999.000000   -9999.000000       0.081500   -9999.000000
50934     50934     neimenggu      121.5697       45.3800           58       206     2012      02        20        051              0.039958      -8.184937       0.000000       0.131904   -9999.000000   -9999.000000       0.081100       0.014000
50934     50934     neimenggu      121.5697       45.3800           58       206     2012      02        21        052              0.040167     -12.136902       0.000000       0.128520   -9999.000000   -9999.000000       0.085800       0.003000
50934     50934     neimenggu      121.5697       45.3800           58       206     2012      02        22        053              0.041917      -9.905884       0.000000       0.128616   -9999.000000   -9999.000000   -9999.000000       0.053000
50934     50934     neimenggu      121.5697       45.3800           58       206     2012      02        23        054              0.043750      -9.260284       0.000000       0.130305   -9999.000000   -9999.000000       0.073300       0.004000
50934     50934     neimenggu      121.5697       45.3800           58       206     2012      02        24        055              0.046375      -6.270538       0.000000       0.141544   -9999.000000   -9999.000000       0.087300   -9999.000000
50934     50934     neimenggu      121.5697       45.3800           58       206     2012      02        25        056              0.044833      -7.302277       0.000000       0.145858   -9999.000000   -9999.000000       0.078400       0.025000
50934     50934     neimenggu      121.5697       45.3800           58       206     2012      02        26        057              0.044083      -8.756897       0.000000       0.137089   -9999.000000   -9999.000000       0.083800   -9999.000000
50934     50934     neimenggu      121.5697       45.3800           58       206     2012      02        27        058              0.046208      -8.801392       0.000000       0.135079       0.114000   -9999.000000       0.088300       0.031000
50934     50934     neimenggu      121.5697       45.3800           58       206     2012      02        28        059              0.050042      -4.096039       0.000000       0.163155       0.101000   -9999.000000       0.072300       0.017000
50934     50934     neimenggu      121.5697       45.3800           58       206     2012      02        29        060              0.000000   -9999.000000       0.000000   -9999.000000   -9999.000000       0.046100   -9999.000000   -9999.000000
50934     50934     neimenggu      121.5697       45.3800           58       206     2012      03        01        061              0.049958      -1.885071       0.000000       0.192964   -9999.000000       0.030300       0.089000       0.004000
50934     50934     neimenggu      121.5697       45.3800           58       206     2012      03        02        062              0.048000      -6.801025       0.000000       0.155880       0.115000   -9999.000000       0.074600   -9999.000000
50934     50934     neimenggu      121.5697       45.3800           58       206     2012      03        03        063              0.049750      -7.191986       0.000000       0.153039       0.118000   -9999.000000       0.086100   -9999.000000
50934     50934     neimenggu      121.5697       45.3800           58       206     2012      03        04        064              0.055833      -4.330994       0.000000       0.166635   -9999.000000       0.094000   -9999.000000       0.005000
50934     50934     neimenggu      121.5697       45.3800           58       206     2012      03        05        065              0.056750      -3.012695       0.000000       0.176555   -9999.000000       0.055400       0.068300   -9999.000000
50934     50934     neimenggu      121.5697       45.3800           58       206     2012      03        06        066              0.055042      -4.031860       0.000000       0.162558   -9999.000000   -9999.000000       0.070000   -9999.000000
50934     50934     neimenggu      121.5697       45.3800           58       206     2012      03        07        067              0.000000      -5.930969       0.000000       0.161365   -9999.000000   -9999.000000       0.067500   -9999.000000
50934     50934     neimenggu      121.5697       45.3800           58       206     2012      03        08        068              0.051542      -6.252899       0.000000       0.148970   -9999.000000       0.071300       0.067100       0.015000
50934     50934     neimenggu      121.5697       45.3800           58       206     2012      03        09        069              0.051208      -8.065735       0.000000       0.142633   -9999.000000   -9999.000000       0.074800       0.021000
50934     50934     neimenggu      121.5697       45.3800           58       206     2012      03        10        070              0.052542      -5.838379       0.000000       0.154343   -9999.000000   -9999.000000   -9999.000000   -9999.000000
50934     50934     neimenggu      121.5697       45.3800           58       206     2012      03        11        071              0.052375      -7.217316       0.000000       0.149117   -9999.000000   -9999.000000       0.063500   -9999.000000
50934     50934     neimenggu      121.5697       45.3800           58       206     2012      03        12        072              0.053667      -6.758392       0.000000       0.150450       0.108000   -9999.000000       0.088500   -9999.000000
50934     50934     neimenggu      121.5697       45.3800           58       206     2012      03        13        073              0.056333      -4.993042       0.000000       0.161847       0.124000   -9999.000000       0.076800       0.003000
50934     50934     neimenggu      121.5697       45.3800           58       206     2012      03        14        074              0.059500      -3.586273       0.703051       0.178987       0.121000   -9999.000000       0.086900       0.041000
50934     50934     neimenggu      121.5697       45.3800           58       206     2012      03        15        075              0.070583      -2.005005       1.685352       0.192766       0.121000   -9999.000000       0.116100       0.116000
50934     50934     neimenggu      121.5697       45.3800           58       206     2012      03        16        076              0.098000       2.627411       0.000000       0.254137   -9999.000000       0.208700       0.078000       0.014000
50934     50934     neimenggu      121.5697       45.3800           58       206     2012      03        17        077              0.076917       3.327759       0.000000       0.247229       0.113000   -9999.000000       0.072100   -9999.000000
50934     50934     neimenggu      121.5697       45.3800           58       206     2012      03        18        078              0.064583      -5.199036       0.000000       0.164109       0.119000   -9999.000000       0.090800   -9999.000000
50934     50934     neimenggu      121.5697       45.3800           58       206     2012      03        19        079              0.068333      -3.114105       0.000000       0.173477       0.117000       0.042100       0.079700   -9999.000000
50934     50934     neimenggu      121.5697       45.3800           58       206     2012      03        20        080              0.077125      -2.371979       0.426764       0.191595       0.098000   -9999.000000       0.085000       0.005000
50934     50934     neimenggu      121.5697       45.3800           58       206     2012      03        21        081              0.093667       1.085144       0.054864       0.219736   -9999.000000       0.025000   -9999.000000   -9999.000000
50934     50934     neimenggu      121.5697       45.3800           58       206     2012      03        22        082              0.105625       2.279572       0.000000       0.243594       0.124000   -9999.000000       0.077000       0.025000
50934     50934     neimenggu      121.5697       45.3800           58       206     2012      03        23        083              0.107583       3.170837      34.126980       0.243727       0.124000       0.073700       0.092400   -9999.000000
50934     50934     neimenggu      121.5697       45.3800           58       206     2012      03        24        084              0.110917       1.431274       0.000000       0.231212       0.123000   -9999.000000       0.088800       0.005000
50934     50934     neimenggu      121.5697       45.3800           58       206     2012      03        25        085              0.000000       1.265320       0.000000       0.226510       0.121000   -9999.000000       0.082200       0.077000
50934     50934     neimenggu      121.5697       45.3800           58       206     2012      03        26        086              0.122125       1.509308       0.076264       0.231151   -9999.000000       0.055400       0.089500   -9999.000000
50934     50934     neimenggu      121.5697       45.3800           58       206     2012      03        27        087              0.130625       5.541260       0.000000       0.270558   -9999.000000   -9999.000000   -9999.000000       0.004000
50934     50934     neimenggu      121.5697       45.3800           58       206     2012      03        28        088              0.133292       5.510803       0.000000       0.251491       0.112000   -9999.000000       0.082500       0.040000
50934     50934     neimenggu      121.5697       45.3800           58       206     2012      03        29        089              0.135875       8.597748       0.000000       0.273283       0.121000       0.011200       0.101000   -9999.000000
50934     50934     neimenggu      121.5697       45.3800           58       206     2012      03        30        090              0.132125       5.354034       0.000000       0.244993       0.142000   -9999.000000       0.074100       0.215000
50934     50934     neimenggu      121.5697       45.3800           58       206     2012      03        31        091              0.119208       2.018646       1.368610       0.226556       0.114000       0.038700       0.080400   -9999.000000
50934     50934     neimenggu      121.5697       45.3800           58       206     2012      04        01        092              0.117458      -0.909454       0.000000       0.204847   -9999.000000       0.044700       0.078600   -9999.000000
50934     50934     neimenggu      121.5697       45.3800           58       206     2012      04        02        093              0.127333       0.731964       0.000000       0.213660       0.102000   -9999.000000       0.075200       0.047000
50934     50934     neimenggu      121.5697       45.3800           58       206     2012      04        03        094              0.130958       1.963837       0.469538       0.226089       0.117000       0.045700       0.078400   -9999.000000
50934     50934     neimenggu      121.5697       45.3800           58       206     2012      04        04        095              0.132083       3.459930       0.000000       0.248975       0.106000   -9999.000000       0.083400       0.001000
50934     50934     neimenggu      121.5697       45.3800           58       206     2012      04        05        096              0.128750       3.730591       0.000000       0.242932       0.091000       0.026900       0.075300   -9999.000000
50934     50934     neimenggu      121.5697       45.3800           58       206     2012      04        06        097              0.128750       1.060852       0.000000       0.221807   -9999.000000       0.103800       0.089400   -9999.000000
50934     50934     neimenggu      121.5697       45.3800           58       206     2012      04        07        098              0.134458       2.480530       0.000000       0.231274       0.121000   -9999.000000   -9999.000000       0.059000
50934     50934     neimenggu      121.5697       45.3800           58       206     2012      04        08        099              0.132667       7.824677       0.000000       0.267915       0.123000       0.014200       0.083100       0.073000
50934     50934     neimenggu      121.5697       45.3800           58       206     2012      04        09        100              0.136708       4.564911       0.000000       0.254454       0.119000       0.131300       0.086700       0.058000
50934     50934     neimenggu      121.5697       45.3800           58       206     2012      04        10        101              0.134542      10.249634       0.878549       0.264662       0.099000       0.062700       0.082900       0.032000
50934     50934     neimenggu      121.5697       45.3800           58       206     2012      04        11        102              0.134458       6.341919       0.000000       0.255888       0.105000   -9999.000000       0.088000   -9999.000000
50934     50934     neimenggu      121.5697       45.3800           58       206     2012      04        12        103              0.135917       9.009888       0.000000       0.265122       0.110000       0.109500       0.091900       0.015000
50934     50934     neimenggu      121.5697       45.3800           58       206     2012      04        13        104              0.137333       8.903900       0.000000       0.262049       0.109000       0.031600   -9999.000000       0.022000
50934     50934     neimenggu      121.5697       45.3800           58       206     2012      04        14        105              0.134375      11.091003       0.668214       0.255491       0.103000   -9999.000000       0.079100       0.038000
50934     50934     neimenggu      121.5697       45.3800           58       206     2012      04        15        106              0.131958       9.155243       0.000000       0.255189       0.107000       0.007700       0.087400       0.093000
50934     50934     neimenggu      121.5697       45.3800           58       206     2012      04        16        107              0.132542       6.330353       0.223934       0.242285   -9999.000000   -9999.000000       0.082000   -9999.000000
50934     50934     neimenggu      121.5697       45.3800           58       206     2012      04        17        108              0.133792       9.285156       0.000000       0.251915       0.096000   -9999.000000   -9999.000000       0.093000
50934     50934     neimenggu      121.5697       45.3800           58       206     2012      04        18        109              0.135000      13.479431       0.000000       0.249452       0.094500       0.052400       0.092800       0.029000
50934     50934     neimenggu      121.5697       45.3800           58       206     2012      04        19        110              0.131375      16.454529       0.141708       0.243642       0.112000   -9999.000000       0.120400       0.269000
50934     50934     neimenggu      121.5697       45.3800           58       206     2012      04        20        111              0.128667      15.371826       0.000000       0.243175       0.106000   -9999.000000   -9999.000000       0.037000
50934     50934     neimenggu      121.5697       45.3800           58       206     2012      04        21        112              0.128083      13.072998       0.000000       0.238461       0.105000       0.107200       0.100100       0.059000
50934     50934     neimenggu      121.5697       45.3800           58       206     2012      04        22        113              0.129958      16.221710       0.000000       0.236644       0.101000       0.125500       0.087700       0.033000
50934     50934     neimenggu      121.5697       45.3800           58       206     2012      04        23        114              0.127208      18.246735       3.607251       0.229596       0.129500       0.066800       0.133300       0.024000
50934     50934     neimenggu      121.5697       45.3800           58       206     2012      04        24        115              0.120333      18.464386       9.271338       0.246439       0.128000       0.140900   -9999.000000   -9999.000000
50934     50934     neimenggu      121.5697       45.3800           58       206     2012      04        25        116              0.000000      10.687469       0.000000       0.308439       0.105000   -9999.000000       0.079000       0.016000
50934     50934     neimenggu      121.5697       45.3800           58       206     2012      04        26        117              0.120542       9.465912       0.147188       0.281099       0.091000   -9999.000000       0.092200       0.048000
50934     50934     neimenggu      121.5697       45.3800           58       206     2012      04        27        118              0.116458      11.825256       0.248706       0.270012   -9999.000000       0.102100       0.105600   -9999.000000
50934     50934     neimenggu      121.5697       45.3800           58       206     2012      04        28        119              0.114250       8.838318       0.312266       0.270851       0.118000       0.097800       0.085300       0.087000
50934     50934     neimenggu      121.5697       45.3800           58       206     2012      04        29        120              0.116625       7.799072       0.128359       0.267319       0.102000       0.249500       0.092700   -9999.000000
50934     50934     neimenggu      121.5697       45.3800           58       206     2012      04        30        121              0.114792      12.607819       4.374414       0.261172       0.100000   -9999.000000       0.087000       0.046000
50934     50934     neimenggu      121.5697       45.3800           58       206     2012      05        01        122              0.116125      14.535614       0.257173       0.252063       0.098500   -9999.000000       0.083100       0.066000
50934     50934     neimenggu      121.5697       45.3800           58       206     2012      05        02        123              0.115125      15.059631       0.089710       0.246438       0.102000   -9999.000000       0.090300   -9999.000000
50934     50934     neimenggu      121.5697       45.3800           58       206     2012      05        03        124              0.113958      16.696259       0.000000       0.244866       0.104500       0.056500       0.080300       0.105000
50934     50934     neimenggu      121.5697       45.3800           58       206     2012      05        04        125              0.110958      19.396271       0.000000       0.232146       0.088000   -9999.000000       0.089700       0.185000
50934     50934     neimenggu      121.5697       45.3800           58       206     2012      05        05        126              0.106292      17.181427       0.000000       0.224782       0.101000   -9999.000000       0.085800       0.150000
50934     50934     neimenggu      121.5697       45.3800           58       206     2012      05        06        127              0.103542      16.051605       0.000000       0.219962       0.102000       0.051700       0.080300       0.139000
50934     50934     neimenggu      121.5697       45.3800           58       206     2012      05        07        128              0.100583      17.231720       0.000000       0.215276   -9999.000000   -9999.000000       0.077700       0.197000
50934     50934     neimenggu      121.5697       45.3800           58       206     2012      05        08        129              0.099833      18.486359       0.000000       0.211836       0.102000   -9999.000000       0.086700       0.166000
50934     50934     neimenggu      121.5697       45.3800           58       206     2012      05        09        130              0.097792      18.548431       0.106439       0.210395       0.092000   -9999.000000       0.080400       0.180000
50934     50934     neimenggu      121.5697       45.3800           58       206     2012      05        10        131              0.096750      18.811768       0.000000       0.209878       0.103000   -9999.000000       0.086800       0.122000
50934     50934     neimenggu      121.5697       45.3800           58       206     2012      05        11        132              0.092792      19.059723       0.361907       0.208049       0.134000       0.079000   -9999.000000       0.185000
50934     50934     neimenggu      121.5697       45.3800           58       206     2012      05        12        133              0.108833      17.225037      12.703588       0.210279   -9999.000000       0.290100       0.179400       0.721000
50934     50934     neimenggu      121.5697       45.3800           58       206     2012      05        13        134              0.122542      12.062073       1.357871       0.304430   -9999.000000   -9999.000000       0.162900       0.638000
50934     50934     neimenggu      121.5697       45.3800           58       206     2012      05        14        135              0.125417      12.086365       0.369445       0.291339       0.166000       0.161000       0.112000       0.287000
50934     50934     neimenggu      121.5697       45.3800           58       206     2012      05        15        136              0.129875      11.788940       1.438409       0.279953       0.154000       0.177000       0.116400   -9999.000000
50934     50934     neimenggu      121.5697       45.3800           58       206     2012      05        16        137              0.165292      12.268524       3.809925       0.282084       0.289000       0.176700       0.154200       0.619000
50934     50934     neimenggu      121.5697       45.3800           58       206     2012      05        17        138              0.188375      10.463745       0.000000       0.300383       0.154500       0.401800       0.099600       0.318000
50934     50934     neimenggu      121.5697       45.3800           58       206     2012      05        18        139              0.188333      18.203339       3.837201       0.278965       0.140000       0.022600       0.083700       0.239000
50934     50934     neimenggu      121.5697       45.3800           58       206     2012      05        19        140              0.183667      21.458893       0.000000       0.263545       0.122500       0.093500       0.085400       0.265000
50934     50934     neimenggu      121.5697       45.3800           58       206     2012      05        20        141              0.181625      18.328827       0.000000       0.250265       0.117000       0.118400       0.079100       0.156000
50934     50934     neimenggu      121.5697       45.3800           58       206     2012      05        21        142              0.179375      21.373291       0.277011       0.240077       0.168000       0.039700       0.105100       0.258000
50934     50934     neimenggu      121.5697       45.3800           58       206     2012      05        22        143              0.172458      24.447723       1.445341       0.230963       0.243500   -9999.000000   -9999.000000       0.207000
50934     50934     neimenggu      121.5697       45.3800           58       206     2012      05        23        144              0.170583      17.307922       0.000000       0.247227   -9999.000000   -9999.000000       0.079900   -9999.000000
50934     50934     neimenggu      121.5697       45.3800           58       206     2012      05        24        145              0.168917      15.962463       0.000000       0.235195   -9999.000000       0.105900       0.083300       0.201000
50934     50934     neimenggu      121.5697       45.3800           58       206     2012      05        25        146              0.000000      16.418304       0.064316       0.228983       0.141000   -9999.000000       0.078900       0.143000
50934     50934     neimenggu      121.5697       45.3800           58       206     2012      05        26        147              0.168125      19.032227       0.000000       0.221358       0.153000   -9999.000000       0.081900   -9999.000000
50934     50934     neimenggu      121.5697       45.3800           58       206     2012      05        27        148              0.166708      19.361420       0.000000       0.217970       0.172000       0.023500       0.084700       0.244000
50934     50934     neimenggu      121.5697       45.3800           58       206     2012      05        28        149              0.162875      22.145630       0.000000       0.210179       0.186500   -9999.000000   -9999.000000   -9999.000000
50934     50934     neimenggu      121.5697       45.3800           58       206     2012      05        29        150              0.155042      22.253845       8.058621       0.205491       0.327000       0.130500       0.078000       0.694000
50934     50934     neimenggu      121.5697       45.3800           58       206     2012      05        30        151              0.150167      19.060944       1.792912       0.244529       0.219000       0.254300       0.096700   -9999.000000
50934     50934     neimenggu      121.5697       45.3800           58       206     2012      05        31        152              0.149083      16.926392       0.637524       0.269442       0.166000   -9999.000000       0.082300   -9999.000000
50934     50934     neimenggu      121.5697       45.3800           58       206     2012      06        01        153              0.146083      19.507355       6.190697       0.250077       0.201000       0.057300       0.139300       0.264000
50934     50934     neimenggu      121.5697       45.3800           58       206     2012      06        02        154              0.194292      19.452148      19.721539       0.256367       0.416000   -9999.000000       0.172000       0.803000
50934     50934     neimenggu      121.5697       45.3800           58       206     2012      06        03        155              0.202958      15.818665       3.866608       0.342164       0.379000   -9999.000000       0.145800       0.797000
50934     50934     neimenggu      121.5697       45.3800           58       206     2012      06        04        156              0.191917      18.473114       2.979028       0.323790       0.422500       0.550600       0.141900       0.737000
50934     50934     neimenggu      121.5697       45.3800           58       206     2012      06        05        157              0.191292      17.405762       0.339694       0.321747       0.354000       0.096800       0.115300       0.558000
50934     50934     neimenggu      121.5697       45.3800           58       206     2012      06        06        158              0.185958      21.418640      13.083130       0.302953       0.280000       0.184300       0.138100       0.845000
50934     50934     neimenggu      121.5697       45.3800           58       206     2012      06        07        159              0.184667      20.192688       0.340743       0.337522       0.269000       0.351900       0.111900       0.577000
50934     50934     neimenggu      121.5697       45.3800           58       206     2012      06        08        160              0.179417      21.842010       0.958723       0.313222       0.275000       0.197500   -9999.000000       0.567000
50934     50934     neimenggu      121.5697       45.3800           58       206     2012      06        09        161              0.169542      20.392975       0.294091       0.304987       0.275500       0.364500       0.097600       0.412000
50934     50934     neimenggu      121.5697       45.3800           58       206     2012      06        10        162              0.166375      18.402008       0.401978       0.298523       0.273000       0.192600       0.081600       0.316000
50934     50934     neimenggu      121.5697       45.3800           58       206     2012      06        11        163              0.000000      17.434113       3.221482       0.289554       0.282000       0.099100       0.114000       0.350000
50934     50934     neimenggu      121.5697       45.3800           58       206     2012      06        12        164              0.214792      16.940063      21.402973       0.297251   -9999.000000       0.546600       0.168900       0.866000
50934     50934     neimenggu      121.5697       45.3800           58       206     2012      06        13        165              0.216333      14.288727       0.204166       0.351403   -9999.000000   -9999.000000       0.170400   -9999.000000
50934     50934     neimenggu      121.5697       45.3800           58       206     2012      06        14        166              0.211917      17.084595      20.358438       0.329289       0.500000       0.264100   -9999.000000       0.782000
50934     50934     neimenggu      121.5697       45.3800           58       206     2012      06        15        167              0.238167      17.974701      23.932926       0.337832   -9999.000000       0.479100       0.169100       1.000000
50934     50934     neimenggu      121.5697       45.3800           58       206     2012      06        16        168              0.232083      15.687225       8.283338       0.375157       0.456000       0.345500       0.164500       0.783000
50934     50934     neimenggu      121.5697       45.3800           58       206     2012      06        17        169              0.239125      19.123016       7.833340       0.354943   -9999.000000       0.320800       0.154300       0.817000
50934     50934     neimenggu      121.5697       45.3800           58       206     2012      06        18        170              0.226958      19.274780       0.000000       0.356691       0.460500   -9999.000000       0.158600       0.945000
50934     50934     neimenggu      121.5697       45.3800           58       206     2012      06        19        171              0.220333      21.981659       0.000000       0.335588       0.393000       0.308100       0.130100       0.638000
50934     50934     neimenggu      121.5697       45.3800           58       206     2012      06        20        172              0.213958      23.654694       0.000000       0.324111       0.279500       0.310900       0.101700       0.473000
50934     50934     neimenggu      121.5697       45.3800           58       206     2012      06        21        173              0.207875      23.707001       0.687129       0.315422       0.294000       0.398500       0.090600   -9999.000000
50934     50934     neimenggu      121.5697       45.3800           58       206     2012      06        22        174              0.203792      24.898529       0.000000       0.310572       0.291500       0.179000       0.099200       0.472000
50934     50934     neimenggu      121.5697       45.3800           58       206     2012      06        23        175              0.197500      24.799042       0.000000       0.303166       0.282000   -9999.000000       0.096900       0.428000
50934     50934     neimenggu      121.5697       45.3800           58       206     2012      06        24        176              0.197542      24.824280      13.955482       0.298735       0.468000       0.126200       0.148200   -9999.000000
50934     50934     neimenggu      121.5697       45.3800           58       206     2012      06        25        177              0.209417      22.571075       0.107807       0.336589       0.393000   -9999.000000   -9999.000000       0.688000
50934     50934     neimenggu      121.5697       45.3800           58       206     2012      06        26        178              0.203292      23.636322       6.362913       0.324353       0.420000       0.311400       0.111900   -9999.000000
50934     50934     neimenggu      121.5697       45.3800           58       206     2012      06        27        179              0.214292      24.396515       3.243573       0.323394       0.412000       0.554200       0.170100       0.987000
50934     50934     neimenggu      121.5697       45.3800           58       206     2012      06        28        180              0.213375      22.933228      15.120936       0.332419       0.394000       0.341100       0.152100       0.950000
50934     50934     neimenggu      121.5697       45.3800           58       206     2012      06        29        181              0.230958      23.291107       3.762973       0.333824       0.429000       0.332400       0.160400   -9999.000000
50934     50934     neimenggu      121.5697       45.3800           58       206     2012      06        30        182              0.217792      22.725006       1.902113       0.344160       0.339500       0.228000       0.135800   -9999.000000
50934     50934     neimenggu      121.5697       45.3800           58       206     2012      07        01        183              0.213250      24.436554       5.572989       0.324319   -9999.000000   -9999.000000   -9999.000000       0.792000
50934     50934     neimenggu      121.5697       45.3800           58       206     2012      07        02        184              0.236667      18.659393      19.566614       0.338010       0.433000       0.261600       0.166400       0.977000
50934     50934     neimenggu      121.5697       45.3800           58       206     2012      07        03        185              0.246792      20.258087       3.138301       0.347272       0.429000       0.195500       0.220800       0.978000
50934     50934     neimenggu      121.5697       45.3800           58       206     2012      07        04        186              0.233833      20.608032       0.184784       0.348335       0.475000       0.447900       0.151200       0.838000
50934     50934     neimenggu      121.5697       45.3800           58       206     2012      07        05        187              0.225417      24.282990       0.458598       0.329843   -9999.000000       0.194800       0.142500       0.637000
50934     50934     neimenggu      121.5697       45.3800           58       206     2012      07        06        188              0.218292      25.260010       0.000000       0.321463   -9999.000000   -9999.000000       0.127200       0.611000
50934     50934     neimenggu      121.5697       45.3800           58       206     2012      07        07        189              0.210167      26.151703       0.139323       0.311745   -9999.000000       0.155700       0.102300       0.475000
50934     50934     neimenggu      121.5697       45.3800           58       206     2012      07        08        190              0.203833      26.782715       1.439773       0.303591       0.313000       0.180900       0.103400       0.630000
50934     50934     neimenggu      121.5697       45.3800           58       206     2012      07        09        191              0.203083      25.743134       0.372148       0.305920       0.353500       0.191100       0.153100       0.506000
50934     50934     neimenggu      121.5697       45.3800           58       206     2012      07        10        192              0.196250      26.235718       3.545330       0.301409       0.370000       0.249000       0.146200       0.560000
50934     50934     neimenggu      121.5697       45.3800           58       206     2012      07        11        193              0.247500      24.129181      37.597626       0.302785   -9999.000000       0.243400       0.210200       1.000000
50934     50934     neimenggu      121.5697       45.3800           58       206     2012      07        12        194              0.245208      21.326569       0.253626       0.371980   -9999.000000       0.248200   -9999.000000   -9999.000000
50934     50934     neimenggu      121.5697       45.3800           58       206     2012      07        13        195              0.235292      21.033722       2.040686       0.345223       0.426000       0.331600       0.153400       0.896000
50934     50934     neimenggu      121.5697       45.3800           58       206     2012      07        14        196              0.228167      23.624481       0.834245       0.328733       0.330000       0.204900       0.143900       0.692000
50934     50934     neimenggu      121.5697       45.3800           58       206     2012      07        15        197              0.221125      25.272675       0.000000       0.318490   -9999.000000       0.147500       0.127500       0.643000
50934     50934     neimenggu      121.5697       45.3800           58       206     2012      07        16        198              0.212250      26.293213       0.000000       0.309652       0.377500       0.061000       0.143800       0.615000
50934     50934     neimenggu      121.5697       45.3800           58       206     2012      07        17        199              0.199333      27.328156       0.000000       0.301882       0.270000       0.128400       0.155400       0.502000
50934     50934     neimenggu      121.5697       45.3800           58       206     2012      07        18        200              0.187708      26.874115       0.230856       0.292582       0.311000       0.200100       0.132800       0.590000
50934     50934     neimenggu      121.5697       45.3800           58       206     2012      07        19        201              0.178917      25.741241       0.000000       0.291489       0.333000   -9999.000000       0.137700       0.553000
50934     50934     neimenggu      121.5697       45.3800           58       206     2012      07        20        202              0.168958      27.452606       0.763916       0.284938       0.322000       0.091500       0.151700   -9999.000000
50934     50934     neimenggu      121.5697       45.3800           58       206     2012      07        21        203              0.201875      26.700623      18.817816       0.284091   -9999.000000       0.156400       0.187900       1.000000
50934     50934     neimenggu      121.5697       45.3800           58       206     2012      07        22        204              0.253333      25.951569      43.566555       0.322258   -9999.000000       0.295600       0.197000       1.000000
50934     50934     neimenggu      121.5697       45.3800           58       206     2012      07        23        205              0.239333      20.229309       0.805247       0.379607   -9999.000000       0.403800   -9999.000000   -9999.000000
50934     50934     neimenggu      121.5697       45.3800           58       206     2012      07        24        206              0.233083      24.343781       0.000000       0.342823       0.485000   -9999.000000       0.186200       0.776000
50934     50934     neimenggu      121.5697       45.3800           58       206     2012      07        25        207              0.227792      26.337952       0.709132       0.329663       0.440000       0.193200       0.194300   -9999.000000
50934     50934     neimenggu      121.5697       45.3800           58       206     2012      07        26        208              0.222250      26.846069       0.149956       0.323428   -9999.000000       0.221500       0.194500       0.653000
50934     50934     neimenggu      121.5697       45.3800           58       206     2012      07        27        209              0.217125      24.909515       0.263993       0.313078   -9999.000000       0.185700       0.178700       0.583000
50934     50934     neimenggu      121.5697       45.3800           58       206     2012      07        28        210              0.238667      25.402496      36.728619       0.306769   -9999.000000       0.272800       0.254600   -9999.000000
50934     50934     neimenggu      121.5697       45.3800           58       206     2012      07        29        211              0.241000      21.027252       3.265851       0.365829   -9999.000000       0.147400   -9999.000000       0.890000
50934     50934     neimenggu      121.5697       45.3800           58       206     2012      07        30        212              0.235417      19.438416       0.069319       0.352339   -9999.000000       0.330100       0.225500       0.721000
50934     50934     neimenggu      121.5697       45.3800           58       206     2012      07        31        213              0.231042      21.054474       0.000000       0.335847   -9999.000000   -9999.000000       0.221800       0.792000
50934     50934     neimenggu      121.5697       45.3800           58       206     2012      08        01        214              0.225708      22.791412       0.258801       0.325193   -9999.000000       0.311800       0.185600       0.736000
50934     50934     neimenggu      121.5697       45.3800           58       206     2012      08        02        215              0.221875      22.492096       3.783411       0.318939   -9999.000000       0.323200       0.189300       0.558000
50934     50934     neimenggu      121.5697       45.3800           58       206     2012      08        03        216              0.218208      21.884979       0.000000       0.315228   -9999.000000       0.098300       0.207000       0.643000
50934     50934     neimenggu      121.5697       45.3800           58       206     2012      08        04        217              0.215250      22.431824       0.000000       0.313818   -9999.000000       0.165000       0.170000       0.611000
50934     50934     neimenggu      121.5697       45.3800           58       206     2012      08        05        218              0.212333      24.607269       0.000000       0.307948       0.463000       0.324500       0.171100       0.571000
50934     50934     neimenggu      121.5697       45.3800           58       206     2012      08        06        219              0.207458      26.083649       0.000000       0.301027   -9999.000000   -9999.000000       0.226100       0.644000
50934     50934     neimenggu      121.5697       45.3800           58       206     2012      08        07        220              0.200542      26.511780       0.212325       0.294568   -9999.000000       0.129500   -9999.000000       0.535000
50934     50934     neimenggu      121.5697       45.3800           58       206     2012      08        08        221              0.192083      26.947540       0.067743       0.288857       0.500000       0.260600       0.222000       0.572000
50934     50934     neimenggu      121.5697       45.3800           58       206     2012      08        09        222              0.184333      23.632355       0.767763       0.285063       0.500000       0.099800   -9999.000000       0.593000
50934     50934     neimenggu      121.5697       45.3800           58       206     2012      08        10        223              0.177750      21.859039       0.794890       0.279392       0.498000       0.194600       0.195800   -9999.000000
50934     50934     neimenggu      121.5697       45.3800           58       206     2012      08        11        224              0.171833      21.066223       0.400274       0.285680   -9999.000000   -9999.000000       0.225300       0.577000
50934     50934     neimenggu      121.5697       45.3800           58       206     2012      08        12        225              0.172208      18.231323       0.000000       0.288208       0.500000       0.163000       0.202000       0.509000
50934     50934     neimenggu      121.5697       45.3800           58       206     2012      08        13        226              0.170417      20.882416       0.000000       0.280956       0.492000   -9999.000000       0.198600       0.551000
50934     50934     neimenggu      121.5697       45.3800           58       206     2012      08        14        227              0.166208      21.725189       0.155408       0.274996   -9999.000000       0.160000       0.216200       0.596000
50934     50934     neimenggu      121.5697       45.3800           58       206     2012      08        15        228              0.163375      22.430878       0.000000       0.272328       0.500000       0.177900   -9999.000000       0.452000
50934     50934     neimenggu      121.5697       45.3800           58       206     2012      08        16        229              0.158708      22.617432       0.000000       0.267234   -9999.000000   -9999.000000       0.200200       0.572000
50934     50934     neimenggu      121.5697       45.3800           58       206     2012      08        17        230              0.153250      23.811310       2.933411       0.261474   -9999.000000       0.060700       0.229300       0.585000
50934     50934     neimenggu      121.5697       45.3800           58       206     2012      08        18        231              0.148417      23.267090       0.000000       0.276026   -9999.000000   -9999.000000       0.204800   -9999.000000
50934     50934     neimenggu      121.5697       45.3800           58       206     2012      08        19        232              0.147000      21.795898       0.000000       0.272357       0.500000       0.150100       0.218200       0.589000
50934     50934     neimenggu      121.5697       45.3800           58       206     2012      08        20        233              0.140417      22.284180       0.000000       0.263814   -9999.000000       0.251000       0.226300       0.559000
50934     50934     neimenggu      121.5697       45.3800           58       206     2012      08        21        234              0.139167      17.097321       1.014161       0.261254       0.447500       0.119400       0.194200   -9999.000000
50934     50934     neimenggu      121.5697       45.3800           58       206     2012      08        22        235              0.136417      18.089813       0.000000       0.256332       0.495000       0.107500       0.193000   -9999.000000
50934     50934     neimenggu      121.5697       45.3800           58       206     2012      08        23        236              0.133500      18.936066       0.000000       0.251717       0.498000   -9999.000000       0.214000   -9999.000000
50934     50934     neimenggu      121.5697       45.3800           58       206     2012      08        24        237              0.131042      21.963104       0.000000       0.245800       0.494000   -9999.000000       0.201000   -9999.000000
50934     50934     neimenggu      121.5697       45.3800           58       206     2012      08        25        238              0.000000      23.444153       0.000000       0.241325       0.484000       0.130600       0.219500   -9999.000000
50934     50934     neimenggu      121.5697       45.3800           58       206     2012      08        26        239              0.123583      24.279541       0.000000       0.237106       0.472500   -9999.000000   -9999.000000   -9999.000000
50934     50934     neimenggu      121.5697       45.3800           58       206     2012      08        27        240              0.119542      24.434814       0.000000       0.232604       0.500000       0.153400       0.184300       0.546000
50934     50934     neimenggu      121.5697       45.3800           58       206     2012      08        28        241              0.117500      23.998993       0.000000       0.231797       0.500000       0.207400       0.182100       0.558000
50934     50934     neimenggu      121.5697       45.3800           58       206     2012      08        29        242              0.114000      24.972931       0.000000       0.228177       0.478000   -9999.000000       0.180300       0.491000
50934     50934     neimenggu      121.5697       45.3800           58       206     2012      08        30        243              0.110875      22.646576       0.000000       0.219302       0.478000       0.120000       0.187900       0.528000
50934     50934     neimenggu      121.5697       45.3800           58       206     2012      08        31        244              0.109208      23.583496       0.000000       0.216972       0.478500   -9999.000000       0.195700       0.587000
50934     50934     neimenggu      121.5697       45.3800           58       206     2012      09        01        245              0.106875      26.132141       0.341213       0.216083       0.362000       0.100100   -9999.000000       0.538000
50934     50934     neimenggu      121.5697       45.3800           58       206     2012      09        02        246              0.119250      25.749176      11.531613       0.213276   -9999.000000       0.231200       0.206500       0.807000
50934     50934     neimenggu      121.5697       45.3800           58       206     2012      09        03        247              0.143292      17.080627       0.280784       0.290658   -9999.000000   -9999.000000       0.230200       0.921000
50934     50934     neimenggu      121.5697       45.3800           58       206     2012      09        04        248              0.144875      16.614349       1.495237       0.286643   -9999.000000       0.204400       0.172000       0.724000
50934     50934     neimenggu      121.5697       45.3800           58       206     2012      09        05        249              0.146125      15.129028       0.000000       0.287240       0.499000       0.227000       0.180400       0.629000
50934     50934     neimenggu      121.5697       45.3800           58       206     2012      09        06        250              0.146708      16.666229       0.000000       0.277311       0.467500       0.219500       0.172800       0.495000
50934     50934     neimenggu      121.5697       45.3800           58       206     2012      09        07        251              0.146667      18.902985       0.000000       0.268779       0.476000       0.309900       0.154900       0.504000
50934     50934     neimenggu      121.5697       45.3800           58       206     2012      09        08        252              0.145000      20.443481       0.000000       0.264244       0.473000       0.110200       0.166800   -9999.000000
50934     50934     neimenggu      121.5697       45.3800           58       206     2012      09        09        253              0.141083      21.010864       0.000000       0.260243       0.441500       0.168200       0.173500       0.478000
50934     50934     neimenggu      121.5697       45.3800           58       206     2012      09        10        254              0.138333      20.649384       3.386850       0.254840       0.459000   -9999.000000       0.166200       0.491000
50934     50934     neimenggu      121.5697       45.3800           58       206     2012      09        11        255              0.182417      21.306305      18.620544       0.266116       0.408000       0.144100       0.210900       0.823000
50934     50934     neimenggu      121.5697       45.3800           58       206     2012      09        12        256              0.226875      15.899139       0.585938       0.318232       0.457500       0.364000   -9999.000000       0.697000
50934     50934     neimenggu      121.5697       45.3800           58       206     2012      09        13        257              0.217083      12.943939       1.314720       0.318442       0.459000       0.245300       0.197200       0.852000
50934     50934     neimenggu      121.5697       45.3800           58       206     2012      09        14        258              0.209250      13.875488       0.000000       0.311019       0.390000       0.349400       0.209200       0.599000
50934     50934     neimenggu      121.5697       45.3800           58       206     2012      09        15        259              0.203292      15.680084       0.000000       0.301481   -9999.000000   -9999.000000       0.159100       0.513000
50934     50934     neimenggu      121.5697       45.3800           58       206     2012      09        16        260              0.198500      16.876251       0.000000       0.295409       0.349500   -9999.000000       0.156400   -9999.000000
50934     50934     neimenggu      121.5697       45.3800           58       206     2012      09        17        261              0.193875      16.901276       0.000000       0.290515       0.317000       0.129200       0.163000       0.455000
50934     50934     neimenggu      121.5697       45.3800           58       206     2012      09        18        262              0.190625      17.183380       0.000000       0.286296       0.352000       0.155600       0.139900       0.480000
50934     50934     neimenggu      121.5697       45.3800           58       206     2012      09        19        263              0.188125      17.448425       0.247040       0.282796       0.329000       0.155300       0.146200   -9999.000000
50934     50934     neimenggu      121.5697       45.3800           58       206     2012      09        20        264              0.185417      17.619568       0.075892       0.281989       0.300000       0.104500       0.161400       0.363000
50934     50934     neimenggu      121.5697       45.3800           58       206     2012      09        21        265              0.183250      17.962158       1.088358       0.278305   -9999.000000   -9999.000000       0.144800   -9999.000000
50934     50934     neimenggu      121.5697       45.3800           58       206     2012      09        22        266              0.210958      19.158112      10.304562       0.276014       0.236000       0.048300       0.180600       0.830000
50934     50934     neimenggu      121.5697       45.3800           58       206     2012      09        23        267              0.224958      18.015564       0.064485       0.308965       0.250000       0.162900       0.172600       0.739000
50934     50934     neimenggu      121.5697       45.3800           58       206     2012      09        24        268              0.216125      16.568054       1.794195       0.304670       0.249000       0.232700       0.152800   -9999.000000
50934     50934     neimenggu      121.5697       45.3800           58       206     2012      09        25        269              0.221125      15.294708       7.997027       0.297361       0.295000       0.370700       0.165400       0.798000
50934     50934     neimenggu      121.5697       45.3800           58       206     2012      09        26        270              0.218167      13.382233       0.868416       0.323695       0.323000       0.230200       0.159900       0.455000
50934     50934     neimenggu      121.5697       45.3800           58       206     2012      09        27        271              0.236500      13.539978      51.352215       0.310315   -9999.000000       0.336500       0.164600       0.963000
50934     50934     neimenggu      121.5697       45.3800           58       206     2012      09        28        272              0.230400      10.043579       2.251778       0.380949       0.350000   -9999.000000       0.226300       0.804000
50934     50934     neimenggu      121.5697       45.3800           58       206     2012      09        29        273              0.223333       9.672516       0.604891       0.355710   -9999.000000   -9999.000000   -9999.000000       0.668000
50934     50934     neimenggu      121.5697       45.3800           58       206     2012      09        30        274              0.219375      10.319489       0.000000       0.338603       0.348000   -9999.000000       0.187700       0.650000
50934     50934     neimenggu      121.5697       45.3800           58       206     2012      10        01        275              0.216875      11.891357       0.000000       0.331581       0.234000       0.239200       0.173000       0.561000
50934     50934     neimenggu      121.5697       45.3800           58       206     2012      10        02        276              0.215583      13.358032      18.546850       0.326130       0.213000       0.382500       0.121900       0.689000
50934     50934     neimenggu      121.5697       45.3800           58       206     2012      10        03        277              0.214875      14.640778       1.413582       0.343765       0.241000       0.344800       0.140600       0.721000
50934     50934     neimenggu      121.5697       45.3800           58       206     2012      10        04        278              0.212500      11.283325       0.000000       0.345926       0.255000   -9999.000000       0.170600       0.897000
50934     50934     neimenggu      121.5697       45.3800           58       206     2012      10        05        279              0.206917      12.371826       0.000000       0.332274       0.226000       0.308600       0.137600       0.538000
50934     50934     neimenggu      121.5697       45.3800           58       206     2012      10        06        280              0.204083      10.495850       0.000000       0.325313       0.213000       0.304800       0.145100       0.546000
50934     50934     neimenggu      121.5697       45.3800           58       206     2012      10        07        281              0.203208      11.217804       0.000000       0.321970       0.228000       0.230300       0.159000   -9999.000000
50934     50934     neimenggu      121.5697       45.3800           58       206     2012      10        08        282              0.203625      13.043396       0.787872       0.319446       0.218000       0.213100       0.108500       0.551000
50934     50934     neimenggu      121.5697       45.3800           58       206     2012      10        09        283              0.202167      14.306885       1.805130       0.318843       0.223000       0.159800       0.129700       0.583000
50934     50934     neimenggu      121.5697       45.3800           58       206     2012      10        10        284              0.197625       9.670105       0.000000       0.322233   -9999.000000       0.173900   -9999.000000       0.394000
50934     50934     neimenggu      121.5697       45.3800           58       206     2012      10        11        285              0.196083       7.116486       0.349026       0.315397       0.177500       0.412100       0.114100       0.509000
50934     50934     neimenggu      121.5697       45.3800           58       206     2012      10        12        286              0.196083       8.490784       0.688735       0.314460       0.193000       0.275900       0.120600       0.506000
50934     50934     neimenggu      121.5697       45.3800           58       206     2012      10        13        287              0.196333       7.006836       1.820428       0.314669       0.217000       0.201600       0.132500       0.540000
50934     50934     neimenggu      121.5697       45.3800           58       206     2012      10        14        288              0.193875       5.804443       1.108590       0.313332       0.170000       0.075700       0.117100       0.553000
50934     50934     neimenggu      121.5697       45.3800           58       206     2012      10        15        289              0.194708       6.093384       8.908421       0.311059   -9999.000000       0.208900       0.115700   -9999.000000
50934     50934     neimenggu      121.5697       45.3800           58       206     2012      10        16        290              0.222125       6.796570       9.093952       0.326513   -9999.000000   -9999.000000   -9999.000000       0.796000
50934     50934     neimenggu      121.5697       45.3800           58       206     2012      10        17        291              0.213083       3.044556       0.204929       0.343547   -9999.000000   -9999.000000       0.121500       0.874000
50934     50934     neimenggu      121.5697       45.3800           58       206     2012      10        18        292              0.206875       2.690521       0.270578       0.317651   -9999.000000       0.170900       0.127800   -9999.000000
50934     50934     neimenggu      121.5697       45.3800           58       206     2012      10        19        293              0.204125       2.159241       0.395350       0.291824       0.209000       0.301100       0.089700       0.573000
50934     50934     neimenggu      121.5697       45.3800           58       206     2012      10        20        294              0.202042       3.599304       6.398543       0.307484   -9999.000000   -9999.000000       0.090200   -9999.000000
50934     50934     neimenggu      121.5697       45.3800           58       206     2012      10        21        295              0.198958       1.695862       0.000000       0.277503   -9999.000000   -9999.000000       0.091200       0.410000
50934     50934     neimenggu      121.5697       45.3800           58       206     2012      10        22        296              0.198542       1.659180       0.657500       0.276926   -9999.000000   -9999.000000       0.089400       0.451000
50934     50934     neimenggu      121.5697       45.3800           58       206     2012      10        23        297              0.197750       3.224426       0.000000       0.302968   -9999.000000       0.165600       0.097900   -9999.000000
50934     50934     neimenggu      121.5697       45.3800           58       206     2012      10        24        298              0.198375       4.672913       2.798551       0.314006   -9999.000000       0.238000       0.086200       0.431000
50934     50934     neimenggu      121.5697       45.3800           58       206     2012      10        25        299              0.000000       5.703613       0.000000       0.312383   -9999.000000       0.152200       0.075500       0.421000
50934     50934     neimenggu      121.5697       45.3800           58       206     2012      10        26        300              0.198042       6.272217       2.863642       0.313413       0.136000       0.247700       0.096100       0.459000
50934     50934     neimenggu      121.5697       45.3800           58       206     2012      10        27        301              0.198583       8.270294       0.000000       0.313603       0.172000   -9999.000000   -9999.000000       0.378000
50934     50934     neimenggu      121.5697       45.3800           58       206     2012      10        28        302              0.000000       5.597687       6.037564       0.301890       0.160000       0.118700       0.078500       0.360000
50934     50934     neimenggu      121.5697       45.3800           58       206     2012      10        29        303              0.189958       2.019196       0.000000       0.270300       0.152000       0.332000       0.081100       0.260000
50934     50934     neimenggu      121.5697       45.3800           58       206     2012      10        30        304              0.181417      -0.547791       0.506905       0.226855   -9999.000000   -9999.000000       0.065500       0.156000
50934     50934     neimenggu      121.5697       45.3800           58       206     2012      10        31        305              0.163750      -2.463196       1.027060       0.178997   -9999.000000       0.143500       0.065800       0.169000
50934     50934     neimenggu      121.5697       45.3800           58       206     2012      11        01        306              0.144542      -2.396362       0.000000       0.186123   -9999.000000       0.045500       0.071400       0.253000
50934     50934     neimenggu      121.5697       45.3800           58       206     2012      11        02        307              0.145708      -1.231293       0.711623       0.193472   -9999.000000       0.070000   -9999.000000       0.186000
50934     50934     neimenggu      121.5697       45.3800           58       206     2012      11        03        308              0.160458      -0.679810       0.000000       0.198643   -9999.000000   -9999.000000       0.074600       0.174000
50934     50934     neimenggu      121.5697       45.3800           58       206     2012      11        04        309              0.168833      -0.877655       0.000000       0.192528   -9999.000000       0.092200       0.081700       0.240000
50934     50934     neimenggu      121.5697       45.3800           58       206     2012      11        05        310              0.167083      -0.945068       0.000000       0.188275       0.140000       0.187400       0.063500   -9999.000000
50934     50934     neimenggu      121.5697       45.3800           58       206     2012      11        06        311              0.143792      -0.940704       0.000000       0.210429   -9999.000000       0.052200       0.071800       0.230000
50934     50934     neimenggu      121.5697       45.3800           58       206     2012      11        07        312              0.131417      -1.385529       0.000000       0.205024       0.146000       0.171600       0.071000       0.211000
50934     50934     neimenggu      121.5697       45.3800           58       206     2012      11        08        313              0.127167      -0.045258       0.000000       0.217131       0.147000       0.115700   -9999.000000       0.123000
50934     50934     neimenggu      121.5697       45.3800           58       206     2012      11        09        314              0.122958      -0.674469       0.000000       0.215649       0.142000   -9999.000000       0.067000       0.215000
50934     50934     neimenggu      121.5697       45.3800           58       206     2012      11        10        315              0.125583      -0.638336       0.565889       0.210892   -9999.000000       0.120100       0.072600       0.121000
50934     50934     neimenggu      121.5697       45.3800           58       206     2012      11        11        316              0.131708      -0.250946       0.021832       0.206653   -9999.000000   -9999.000000       0.064400       0.120000
50934     50934     neimenggu      121.5697       45.3800           58       206     2012      11        12        317              0.132958      -1.081268       0.458179       0.186693   -9999.000000   -9999.000000       0.071000       0.118000
50934     50934     neimenggu      121.5697       45.3800           58       206     2012      11        13        318              0.000000      -2.089111       0.000000       0.180827   -9999.000000       0.104300   -9999.000000   -9999.000000
50934     50934     neimenggu      121.5697       45.3800           58       206     2012      11        14        319              0.124000      -2.892670       0.000000       0.168285   -9999.000000   -9999.000000       0.056000       0.156000
50934     50934     neimenggu      121.5697       45.3800           58       206     2012      11        15        320              0.121250      -2.996002       0.000000       0.177277   -9999.000000       0.030500       0.076600       0.110000
50934     50934     neimenggu      121.5697       45.3800           58       206     2012      11        16        321              0.121857      -2.143280       0.000000       0.176519       0.128000       0.132800       0.060200   -9999.000000
50934     50934     neimenggu      121.5697       45.3800           58       206     2012      11        17        322              0.000000      -3.306427       0.000000       0.172271   -9999.000000       0.078900       0.068200       0.163000
50934     50934     neimenggu      121.5697       45.3800           58       206     2012      11        18        323              0.106875      -4.883209       0.000000       0.160480   -9999.000000       0.024700       0.065900   -9999.000000
50934     50934     neimenggu      121.5697       45.3800           58       206     2012      11        19        324              0.106875      -6.538971       0.000000       0.148497   -9999.000000       0.068400       0.049300       0.051000
50934     50934     neimenggu      121.5697       45.3800           58       206     2012      11        20        325              0.104208      -6.373840       0.000000       0.147034   -9999.000000       0.036900       0.047700       0.046000
50934     50934     neimenggu      121.5697       45.3800           58       206     2012      11        21        326              0.104083      -6.208282       0.000000       0.146248   -9999.000000       0.140300       0.059500   -9999.000000
50934     50934     neimenggu      121.5697       45.3800           58       206     2012      11        22        327              0.102708      -4.343475       0.000000       0.155337   -9999.000000   -9999.000000       0.051500       0.046000
50934     50934     neimenggu      121.5697       45.3800           58       206     2012      11        23        328              0.098292      -6.853302       0.000000       0.147734   -9999.000000       0.148100       0.060100       0.053000
50934     50934     neimenggu      121.5697       45.3800           58       206     2012      11        24        329              0.095708      -7.750671       0.000000       0.145834   -9999.000000       0.025100   -9999.000000       0.101000
50934     50934     neimenggu      121.5697       45.3800           58       206     2012      11        25        330              0.094042      -7.467255       0.000000       0.143977   -9999.000000       0.071600       0.045400       0.057000
50934     50934     neimenggu      121.5697       45.3800           58       206     2012      11        26        331              0.090125      -7.973145       0.000000       0.143906   -9999.000000       0.099900       0.054400       0.067000
50934     50934     neimenggu      121.5697       45.3800           58       206     2012      11        27        332              0.088042      -9.430298       0.000000       0.142708   -9999.000000   -9999.000000       0.051600       0.109000
50934     50934     neimenggu      121.5697       45.3800           58       206     2012      11        28        333              0.085875      -9.484650       0.000000       0.141556   -9999.000000   -9999.000000       0.054500       0.135000
50934     50934     neimenggu      121.5697       45.3800           58       206     2012      11        29        334              0.082583      -9.826294       0.000000       0.141761   -9999.000000       0.131600       0.059900       0.049000
50934     50934     neimenggu      121.5697       45.3800           58       206     2012      11        30        335              0.077000     -12.153809       0.000000       0.139970   -9999.000000       0.042500   -9999.000000       0.007000
50934     50934     neimenggu      121.5697       45.3800           58       206     2012      12        01        336              0.076250     -13.472321       0.000000       0.137827   -9999.000000   -9999.000000       0.050800       0.041000
50934     50934     neimenggu      121.5697       45.3800           58       206     2012      12        02        337              0.078083     -11.352905       0.000000       0.138274   -9999.000000   -9999.000000       0.058400       0.085000
50934     50934     neimenggu      121.5697       45.3800           58       206     2012      12        03        338              0.076042     -10.993744       0.000000       0.138813   -9999.000000   -9999.000000       0.049600       0.055000
50934     50934     neimenggu      121.5697       45.3800           58       206     2012      12        04        339              0.073458     -13.920990       0.000000       0.137605   -9999.000000   -9999.000000       0.050100   -9999.000000
50934     50934     neimenggu      121.5697       45.3800           58       206     2012      12        05        340              0.071458     -13.725067       0.000000       0.136822   -9999.000000   -9999.000000       0.054000       0.030000
50934     50934     neimenggu      121.5697       45.3800           58       206     2012      12        06        341              0.068583     -15.801270       0.000000       0.135703   -9999.000000   -9999.000000       0.047900       0.001000
50934     50934     neimenggu      121.5697       45.3800           58       206     2012      12        07        342              0.066250     -17.175461       0.000000       0.134435   -9999.000000   -9999.000000       0.048400   -9999.000000
50934     50934     neimenggu      121.5697       45.3800           58       206     2012      12        08        343              0.065833     -18.274719       0.000000       0.133121   -9999.000000   -9999.000000       0.058800       0.109000
50934     50934     neimenggu      121.5697       45.3800           58       206     2012      12        09        344              0.069125     -15.049530       0.000000       0.133377   -9999.000000   -9999.000000       0.053000       0.016000
50934     50934     neimenggu      121.5697       45.3800           58       206     2012      12        10        345              0.069167     -12.065277       0.000000       0.134710   -9999.000000   -9999.000000       0.059200       0.054000
50934     50934     neimenggu      121.5697       45.3800           58       206     2012      12        11        346              0.067958     -11.949493       0.000000       0.134371   -9999.000000   -9999.000000   -9999.000000       0.037000
50934     50934     neimenggu      121.5697       45.3800           58       206     2012      12        12        347              0.066875     -12.620026       0.000000       0.133958   -9999.000000   -9999.000000       0.049500   -9999.000000
50934     50934     neimenggu      121.5697       45.3800           58       206     2012      12        13        348              0.067250     -12.049866       0.000000       0.133778   -9999.000000   -9999.000000       0.054000       0.097000
50934     50934     neimenggu      121.5697       45.3800           58       206     2012      12        14        349              0.067833     -11.902161       0.000000       0.134542   -9999.000000   -9999.000000       0.051700       0.041000
50934     50934     neimenggu      121.5697       45.3800           58       206     2012      12        15        350              0.000000     -11.951752       0.000000       0.134391   -9999.000000   -9999.000000       0.051000   -9999.000000
50934     50934     neimenggu      121.5697       45.3800           58       206     2012      12        16        351              0.069083     -15.240723       0.000000       0.133435   -9999.000000   -9999.000000       0.053600       0.008000
50934     50934     neimenggu      121.5697       45.3800           58       206     2012      12        17        352              0.068458     -15.371063       0.000000       0.133406   -9999.000000   -9999.000000   -9999.000000   -9999.000000
50934     50934     neimenggu      121.5697       45.3800           58       206     2012      12        18        353              0.067667     -16.120026       0.000000       0.133226   -9999.000000   -9999.000000       0.049100       0.012000
50934     50934     neimenggu      121.5697       45.3800           58       206     2012      12        19        354              0.067292     -16.337982       0.000000       0.133105   -9999.000000   -9999.000000       0.059200       0.010000
50934     50934     neimenggu      121.5697       45.3800           58       206     2012      12        20        355              0.000000     -14.446991       0.292192       0.133326   -9999.000000   -9999.000000       0.051300   -9999.000000
50934     50934     neimenggu      121.5697       45.3800           58       206     2012      12        21        356              0.068667     -12.498596       0.000000       0.134434   -9999.000000   -9999.000000       0.051900       0.036000
50934     50934     neimenggu      121.5697       45.3800           58       206     2012      12        22        357              0.066583     -14.678314       0.000000       0.133942   -9999.000000   -9999.000000       0.057000       0.043000
50934     50934     neimenggu      121.5697       45.3800           58       206     2012      12        23        358              0.064667     -19.203140       0.000000       0.131901   -9999.000000   -9999.000000   -9999.000000       0.070000
50934     50934     neimenggu      121.5697       45.3800           58       206     2012      12        24        359              0.064050     -19.906738       0.000000       0.129138   -9999.000000   -9999.000000       0.050400       0.040000
50934     50934     neimenggu      121.5697       45.3800           58       206     2012      12        25        360              0.062667     -18.637390       0.000000       0.129844   -9999.000000   -9999.000000       0.053500       0.027000
50934     50934     neimenggu      121.5697       45.3800           58       206     2012      12        26        361              0.000000     -20.757217       0.000000       0.129621   -9999.000000   -9999.000000       0.051900       0.087000
50934     50934     neimenggu      121.5697       45.3800           58       206     2012      12        27        362              0.062833     -18.036285       0.000000       0.129947   -9999.000000   -9999.000000       0.056100       0.106000
50934     50934     neimenggu      121.5697       45.3800           58       206     2012      12        28        363              0.000000     -16.649628       1.609330       0.130605   -9999.000000   -9999.000000   -9999.000000       0.035000
50934     50934     neimenggu      121.5697       45.3800           58       206     2012      12        29        364              0.000000     -15.407562       0.176896       0.130959   -9999.000000   -9999.000000   -9999.000000       0.009000
50934     50934     neimenggu      121.5697       45.3800           58       206     2012      12        30        365              0.000000     -14.646301       0.000000       0.131575   -9999.000000   -9999.000000       0.055700       0.013000
50934     50934     neimenggu      121.5697       45.3800           58       206     2012      12        31        366              0.063867     -14.220947       0.000000       0.131746   -9999.000000   -9999.000000       0.044300       0.007000
