# Supplementary material for: Research on Fusing Multisatellite Soil Moisture Data Based on Bayesian Model Averaging
Source: Hindawi journal article supplement (doi:10.1155/2018/9310838), 2018-06-25
Supplement: f1 [file 9310838.f1.zip › 2012_sm00-10cm_daily_ZDB_ZHY_50937_366days_allin.txt]

50937     50937     neimenggu      121.4667       45.0500           60       206     2012      01        01        001              0.000000   -9999.000000       0.000000   -9999.000000   -9999.000000   -9999.000000       0.092000   -9999.000000
50937     50937     neimenggu      121.4667       45.0500           60       206     2012      01        02        002              0.000000      -9.603516       0.000000       0.135163   -9999.000000   -9999.000000   -9999.000000   -9999.000000
50937     50937     neimenggu      121.4667       45.0500           60       206     2012      01        03        003              0.000000      -9.083893       0.000000       0.135391   -9999.000000   -9999.000000       0.066100       0.142000
50937     50937     neimenggu      121.4667       45.0500           60       206     2012      01        04        004              0.000000      -8.593170       0.000000       0.135572   -9999.000000   -9999.000000       0.082400   -9999.000000
50937     50937     neimenggu      121.4667       45.0500           60       206     2012      01        05        005              0.000000      -8.788025       0.000000       0.135715   -9999.000000   -9999.000000       0.079800       0.089000
50937     50937     neimenggu      121.4667       45.0500           60       206     2012      01        06        006              0.000000      -9.231293       0.000000       0.135829   -9999.000000   -9999.000000       0.079700       0.014000
50937     50937     neimenggu      121.4667       45.0500           60       206     2012      01        07        007              0.000000      -9.917725       0.000000       0.135921   -9999.000000   -9999.000000       0.086900   -9999.000000
50937     50937     neimenggu      121.4667       45.0500           60       206     2012      01        08        008              0.000000     -10.221680       0.000000       0.135994   -9999.000000   -9999.000000       0.071300       0.083000
50937     50937     neimenggu      121.4667       45.0500           60       206     2012      01        09        009              0.000000     -10.622864       0.000000       0.136054   -9999.000000   -9999.000000       0.075100       0.093000
50937     50937     neimenggu      121.4667       45.0500           60       206     2012      01        10        010              0.000000     -11.175049       0.000000       0.136105   -9999.000000   -9999.000000   -9999.000000       0.064000
50937     50937     neimenggu      121.4667       45.0500           60       206     2012      01        11        011              0.000000     -12.114655       0.000000       0.136119   -9999.000000   -9999.000000       0.070200       0.066000
50937     50937     neimenggu      121.4667       45.0500           60       206     2012      01        12        012              0.000000     -12.597717       0.000000       0.135968   -9999.000000   -9999.000000       0.077000   -9999.000000
50937     50937     neimenggu      121.4667       45.0500           60       206     2012      01        13        013              0.000000     -11.012329       0.000000       0.136002   -9999.000000   -9999.000000       0.078400       0.101000
50937     50937     neimenggu      121.4667       45.0500           60       206     2012      01        14        014              0.000000     -10.833252       0.000000       0.136035   -9999.000000   -9999.000000       0.062200       0.085000
50937     50937     neimenggu      121.4667       45.0500           60       206     2012      01        15        015              0.000000     -11.199371       0.000000       0.136067   -9999.000000   -9999.000000       0.072800       0.109000
50937     50937     neimenggu      121.4667       45.0500           60       206     2012      01        16        016              0.000000     -10.885529       0.000000       0.136062   -9999.000000   -9999.000000       0.094100       0.104000
50937     50937     neimenggu      121.4667       45.0500           60       206     2012      01        17        017              0.000000     -11.709015       0.000000       0.136000   -9999.000000   -9999.000000       0.082000       0.141000
50937     50937     neimenggu      121.4667       45.0500           60       206     2012      01        18        018              0.000000     -13.059662       0.000000       0.135561   -9999.000000   -9999.000000       0.091200       0.078000
50937     50937     neimenggu      121.4667       45.0500           60       206     2012      01        19        019              0.000000     -11.975250       0.000000       0.135460   -9999.000000   -9999.000000   -9999.000000       0.140000
50937     50937     neimenggu      121.4667       45.0500           60       206     2012      01        20        020              0.000000     -12.589813       0.000000       0.135438   -9999.000000   -9999.000000       0.076600   -9999.000000
50937     50937     neimenggu      121.4667       45.0500           60       206     2012      01        21        021              0.000000     -16.134888       0.000000       0.134401   -9999.000000   -9999.000000       0.094800       0.077000
50937     50937     neimenggu      121.4667       45.0500           60       206     2012      01        22        022              0.000000     -17.265717       0.000000       0.133716   -9999.000000   -9999.000000       0.085400       0.161000
50937     50937     neimenggu      121.4667       45.0500           60       206     2012      01        23        023              0.000000     -16.749176       0.000000       0.133659   -9999.000000   -9999.000000       0.093200       0.147000
50937     50937     neimenggu      121.4667       45.0500           60       206     2012      01        24        024              0.000000     -16.318604       0.000000       0.133524   -9999.000000   -9999.000000       0.099500       0.082000
50937     50937     neimenggu      121.4667       45.0500           60       206     2012      01        25        025              0.000000     -17.190430       0.000000       0.133229   -9999.000000   -9999.000000       0.083000       0.099000
50937     50937     neimenggu      121.4667       45.0500           60       206     2012      01        26        026              0.000000     -14.930939       0.000000       0.133363   -9999.000000   -9999.000000       0.084700       0.165000
50937     50937     neimenggu      121.4667       45.0500           60       206     2012      01        27        027              0.000000     -15.070221       0.000000       0.133342   -9999.000000   -9999.000000       0.097600       0.145000
50937     50937     neimenggu      121.4667       45.0500           60       206     2012      01        28        028              0.000000     -16.437042       0.000000       0.132702   -9999.000000   -9999.000000       0.095300   -9999.000000
50937     50937     neimenggu      121.4667       45.0500           60       206     2012      01        29        029              0.000000     -15.303375       0.000000       0.132673   -9999.000000   -9999.000000       0.098800       0.214000
50937     50937     neimenggu      121.4667       45.0500           60       206     2012      01        30        030              0.000000     -17.229202       0.000000       0.132291   -9999.000000   -9999.000000   -9999.000000       0.026000
50937     50937     neimenggu      121.4667       45.0500           60       206     2012      01        31        031              0.000000     -18.602173       0.000000       0.131724   -9999.000000   -9999.000000       0.078700   -9999.000000
50937     50937     neimenggu      121.4667       45.0500           60       206     2012      02        01        032              0.000000     -18.716232       0.000000       0.131601   -9999.000000   -9999.000000   -9999.000000       0.117000
50937     50937     neimenggu      121.4667       45.0500           60       206     2012      02        02        033              0.000000     -17.958130       0.000000       0.131765   -9999.000000   -9999.000000       0.101900   -9999.000000
50937     50937     neimenggu      121.4667       45.0500           60       206     2012      02        03        034              0.000000     -14.782043       0.000000       0.132625   -9999.000000   -9999.000000       0.090900       0.117000
50937     50937     neimenggu      121.4667       45.0500           60       206     2012      02        04        035              0.000000     -13.649292       0.000000       0.132885   -9999.000000   -9999.000000       0.097800       0.096000
50937     50937     neimenggu      121.4667       45.0500           60       206     2012      02        05        036              0.000000     -10.403687       0.000000       0.133557   -9999.000000   -9999.000000   -9999.000000   -9999.000000
50937     50937     neimenggu      121.4667       45.0500           60       206     2012      02        06        037              0.000000      -8.575653       0.000000       0.133766   -9999.000000   -9999.000000       0.086000       0.071000
50937     50937     neimenggu      121.4667       45.0500           60       206     2012      02        07        038              0.000000     -14.506348       0.000000       0.132113   -9999.000000   -9999.000000       0.095800       0.061000
50937     50937     neimenggu      121.4667       45.0500           60       206     2012      02        08        039              0.000000     -14.458191       0.000000       0.131711   -9999.000000   -9999.000000       0.091700       0.107000
50937     50937     neimenggu      121.4667       45.0500           60       206     2012      02        09        040              0.000000     -12.429657       0.000000       0.132308   -9999.000000   -9999.000000       0.093800       0.011000
50937     50937     neimenggu      121.4667       45.0500           60       206     2012      02        10        041              0.000000     -11.913849       0.000000       0.132088   -9999.000000   -9999.000000       0.104700   -9999.000000
50937     50937     neimenggu      121.4667       45.0500           60       206     2012      02        11        042              0.000000     -12.281769       0.000000       0.131791   -9999.000000   -9999.000000       0.081000       0.144000
50937     50937     neimenggu      121.4667       45.0500           60       206     2012      02        12        043              0.000000     -12.752106       0.000000       0.131547   -9999.000000   -9999.000000       0.086700       0.050000
50937     50937     neimenggu      121.4667       45.0500           60       206     2012      02        13        044              0.000000      -9.238373       0.000000       0.132116   -9999.000000   -9999.000000       0.095600       0.068000
50937     50937     neimenggu      121.4667       45.0500           60       206     2012      02        14        045              0.000000      -9.075409       0.000000       0.132829   -9999.000000   -9999.000000       0.093900       0.073000
50937     50937     neimenggu      121.4667       45.0500           60       206     2012      02        15        046              0.000000     -11.756805       0.000000       0.131770   -9999.000000   -9999.000000       0.099400       0.131000
50937     50937     neimenggu      121.4667       45.0500           60       206     2012      02        16        047              0.000000     -10.669495       0.000000       0.131369   -9999.000000   -9999.000000   -9999.000000       0.019000
50937     50937     neimenggu      121.4667       45.0500           60       206     2012      02        17        048              0.000000     -12.165314       0.000000       0.130703   -9999.000000   -9999.000000       0.077600       0.058000
50937     50937     neimenggu      121.4667       45.0500           60       206     2012      02        18        049              0.000000     -11.592041       0.000000       0.130660   -9999.000000   -9999.000000   -9999.000000   -9999.000000
50937     50937     neimenggu      121.4667       45.0500           60       206     2012      02        19        050              0.000000      -8.963074       0.000000       0.131646   -9999.000000   -9999.000000       0.103900       0.022000
50937     50937     neimenggu      121.4667       45.0500           60       206     2012      02        20        051              0.000000      -6.351624       0.000000       0.145857   -9999.000000   -9999.000000       0.088500       0.157000
50937     50937     neimenggu      121.4667       45.0500           60       206     2012      02        21        052              0.000000     -10.692719       0.000000       0.134865   -9999.000000   -9999.000000       0.096700       0.126000
50937     50937     neimenggu      121.4667       45.0500           60       206     2012      02        22        053              0.000000      -8.848419       0.000000       0.134238   -9999.000000   -9999.000000   -9999.000000       0.092000
50937     50937     neimenggu      121.4667       45.0500           60       206     2012      02        23        054              0.000000      -8.308197       0.000000       0.134613   -9999.000000   -9999.000000       0.081300       0.074000
50937     50937     neimenggu      121.4667       45.0500           60       206     2012      02        24        055              0.000000      -5.468750       0.000000       0.149650   -9999.000000   -9999.000000       0.093700       0.016000
50937     50937     neimenggu      121.4667       45.0500           60       206     2012      02        25        056              0.000000      -6.363892       0.000000       0.157033   -9999.000000   -9999.000000       0.090700       0.031000
50937     50937     neimenggu      121.4667       45.0500           60       206     2012      02        26        057              0.000000      -7.671204       0.000000       0.143663   -9999.000000   -9999.000000       0.091900   -9999.000000
50937     50937     neimenggu      121.4667       45.0500           60       206     2012      02        27        058              0.000000      -7.456879       0.000000       0.143940       0.107000   -9999.000000       0.096300       0.074000
50937     50937     neimenggu      121.4667       45.0500           60       206     2012      02        28        059              0.000000      -3.229431       0.154095       0.176615       0.110000       0.105900       0.079900       0.082000
50937     50937     neimenggu      121.4667       45.0500           60       206     2012      02        29        060              0.000000   -9999.000000       0.000000   -9999.000000   -9999.000000       0.007300   -9999.000000   -9999.000000
50937     50937     neimenggu      121.4667       45.0500           60       206     2012      03        01        061              0.000000      -0.850922       0.437618       0.206094   -9999.000000       0.051200       0.093100       0.141000
50937     50937     neimenggu      121.4667       45.0500           60       206     2012      03        02        062              0.000000      -5.487122       0.000000       0.166289       0.119000   -9999.000000       0.085000   -9999.000000
50937     50937     neimenggu      121.4667       45.0500           60       206     2012      03        03        063              0.000000      -5.992493       0.000000       0.161242       0.119000   -9999.000000       0.095700       0.055000
50937     50937     neimenggu      121.4667       45.0500           60       206     2012      03        04        064              0.000000      -3.373291       0.050587       0.174110       0.105000   -9999.000000   -9999.000000       0.031000
50937     50937     neimenggu      121.4667       45.0500           60       206     2012      03        05        065              0.000000      -2.051117       3.087319       0.187817   -9999.000000       0.032100       0.071700   -9999.000000
50937     50937     neimenggu      121.4667       45.0500           60       206     2012      03        06        066              0.000000      -2.997375       0.000000       0.172517   -9999.000000   -9999.000000       0.077200       0.029000
50937     50937     neimenggu      121.4667       45.0500           60       206     2012      03        07        067              0.000000      -4.117371       0.000000       0.172799   -9999.000000   -9999.000000       0.077200       0.059000
50937     50937     neimenggu      121.4667       45.0500           60       206     2012      03        08        068              0.000000      -4.911530       0.000000       0.164611   -9999.000000       0.082800       0.076500       0.106000
50937     50937     neimenggu      121.4667       45.0500           60       206     2012      03        09        069              0.000000      -7.112946       0.000000       0.148491       0.121000   -9999.000000       0.082600       0.138000
50937     50937     neimenggu      121.4667       45.0500           60       206     2012      03        10        070              0.000000      -4.799774       0.000000       0.162960   -9999.000000   -9999.000000   -9999.000000   -9999.000000
50937     50937     neimenggu      121.4667       45.0500           60       206     2012      03        11        071              0.000000      -6.486206       0.000000       0.157850   -9999.000000   -9999.000000       0.072000       0.112000
50937     50937     neimenggu      121.4667       45.0500           60       206     2012      03        12        072              0.000000      -5.847565       0.000000       0.151944       0.116000       0.153100       0.096300       0.043000
50937     50937     neimenggu      121.4667       45.0500           60       206     2012      03        13        073              0.000000      -3.762909       0.000000       0.172859       0.123000   -9999.000000       0.087500       0.071000
50937     50937     neimenggu      121.4667       45.0500           60       206     2012      03        14        074              0.000000      -2.137177       9.288549       0.195879       0.120000       0.211300       0.088800       0.014000
50937     50937     neimenggu      121.4667       45.0500           60       206     2012      03        15        075              0.000000      -0.751831       4.158325       0.207104       0.126000   -9999.000000       0.144400       0.206000
50937     50937     neimenggu      121.4667       45.0500           60       206     2012      03        16        076              0.000000       2.705322       0.000000       0.256707   -9999.000000   -9999.000000       0.090100       0.087000
50937     50937     neimenggu      121.4667       45.0500           60       206     2012      03        17        077              0.000000       3.635010       0.000000       0.258824   -9999.000000       0.099400       0.084300       0.022000
50937     50937     neimenggu      121.4667       45.0500           60       206     2012      03        18        078              0.000000      -5.230865       0.000000       0.162196       0.120000   -9999.000000       0.098200   -9999.000000
50937     50937     neimenggu      121.4667       45.0500           60       206     2012      03        19        079              0.000000      -2.456818       0.000000       0.179729       0.115000       0.034000       0.089600       0.063000
50937     50937     neimenggu      121.4667       45.0500           60       206     2012      03        20        080              0.000000      -1.259918       1.022731       0.203574       0.101000   -9999.000000       0.096400       0.084000
50937     50937     neimenggu      121.4667       45.0500           60       206     2012      03        21        081              0.000000       1.604218       0.000000       0.231701   -9999.000000   -9999.000000   -9999.000000       0.159000
50937     50937     neimenggu      121.4667       45.0500           60       206     2012      03        22        082              0.000000       3.108124       0.892677       0.255982       0.121000   -9999.000000       0.084200       0.133000
50937     50937     neimenggu      121.4667       45.0500           60       206     2012      03        23        083              0.000000       3.964539       0.096835       0.258071       0.127000       0.044700       0.113800       0.021000
50937     50937     neimenggu      121.4667       45.0500           60       206     2012      03        24        084              0.000000       1.707642       0.985759       0.237924       0.119000   -9999.000000       0.090300       0.026000
50937     50937     neimenggu      121.4667       45.0500           60       206     2012      03        25        085              0.000000       1.753021       0.921310       0.234865       0.104000   -9999.000000       0.091400       0.128000
50937     50937     neimenggu      121.4667       45.0500           60       206     2012      03        26        086              0.000000       1.849030       0.000000       0.238096   -9999.000000       0.060500       0.095800   -9999.000000
50937     50937     neimenggu      121.4667       45.0500           60       206     2012      03        27        087              0.000000       6.421783       0.000000       0.279369   -9999.000000   -9999.000000   -9999.000000       0.136000
50937     50937     neimenggu      121.4667       45.0500           60       206     2012      03        28        088              0.000000       6.536102       0.000000       0.268674       0.108000       0.036800       0.086500       0.097000
50937     50937     neimenggu      121.4667       45.0500           60       206     2012      03        29        089              0.000000       9.714874       0.000000       0.277012       0.108000   -9999.000000       0.098100   -9999.000000
50937     50937     neimenggu      121.4667       45.0500           60       206     2012      03        30        090              0.000000       6.592407       0.000000       0.263487       0.124000   -9999.000000       0.083600       0.082000
50937     50937     neimenggu      121.4667       45.0500           60       206     2012      03        31        091              0.000000       3.120789       0.141257       0.238304   -9999.000000       0.071700       0.095800   -9999.000000
50937     50937     neimenggu      121.4667       45.0500           60       206     2012      04        01        092              0.000000       0.375122       1.227514       0.214865   -9999.000000   -9999.000000       0.094400       0.009000
50937     50937     neimenggu      121.4667       45.0500           60       206     2012      04        02        093              0.000000       1.037109       0.000000       0.217136       0.105000   -9999.000000       0.084800       0.092000
50937     50937     neimenggu      121.4667       45.0500           60       206     2012      04        03        094              0.000000       3.252167       0.059610       0.240374       0.111000       0.013200       0.093400   -9999.000000
50937     50937     neimenggu      121.4667       45.0500           60       206     2012      04        04        095              0.000000       4.525269       1.183514       0.262235       0.093000   -9999.000000       0.108700       0.114000
50937     50937     neimenggu      121.4667       45.0500           60       206     2012      04        05        096              0.000000       4.458466       1.288873       0.249094       0.090000       0.028400       0.090500       0.082000
50937     50937     neimenggu      121.4667       45.0500           60       206     2012      04        06        097              0.000000       2.272003       0.326022       0.229966   -9999.000000       0.050300       0.100300       0.023000
50937     50937     neimenggu      121.4667       45.0500           60       206     2012      04        07        098              0.000000       3.297272       0.000000       0.239154       0.115000   -9999.000000   -9999.000000       0.061000
50937     50937     neimenggu      121.4667       45.0500           60       206     2012      04        08        099              0.000000       8.620148       0.415009       0.265715       0.108000   -9999.000000       0.096600   -9999.000000
50937     50937     neimenggu      121.4667       45.0500           60       206     2012      04        09        100              0.000000       6.147461       0.000000       0.258108       0.113500   -9999.000000       0.101400       0.089000
50937     50937     neimenggu      121.4667       45.0500           60       206     2012      04        10        101              0.000000      11.309570       0.093379       0.260480       0.091000       0.052900       0.095100       0.121000
50937     50937     neimenggu      121.4667       45.0500           60       206     2012      04        11        102              0.000000       7.893036       0.000000       0.254982       0.114000   -9999.000000       0.105000       0.019000
50937     50937     neimenggu      121.4667       45.0500           60       206     2012      04        12        103              0.000000      10.200714       0.000000       0.255969       0.111000   -9999.000000       0.110000       0.019000
50937     50937     neimenggu      121.4667       45.0500           60       206     2012      04        13        104              0.000000      10.253204      16.174431       0.253681       0.110000       0.032000       0.090700       0.115000
50937     50937     neimenggu      121.4667       45.0500           60       206     2012      04        14        105              0.000000      13.063538       0.770845       0.246911       0.109000   -9999.000000       0.097500       0.138000
50937     50937     neimenggu      121.4667       45.0500           60       206     2012      04        15        106              0.000000      10.846649       0.000000       0.244612       0.098000       0.025000       0.101000       0.140000
50937     50937     neimenggu      121.4667       45.0500           60       206     2012      04        16        107              0.000000       7.926331       0.000000       0.239564       0.113000   -9999.000000       0.097300   -9999.000000
50937     50937     neimenggu      121.4667       45.0500           60       206     2012      04        17        108              0.000000      10.290833       0.000000       0.241066       0.104000   -9999.000000   -9999.000000       0.010000
50937     50937     neimenggu      121.4667       45.0500           60       206     2012      04        18        109              0.000000      14.367920       0.000000       0.237285       0.098000       0.146300       0.106700       0.106000
50937     50937     neimenggu      121.4667       45.0500           60       206     2012      04        19        110              0.000000      17.322266       0.134573       0.232400       0.097000   -9999.000000       0.118700       0.196000
50937     50937     neimenggu      121.4667       45.0500           60       206     2012      04        20        111              0.000000      16.499481       0.000000       0.230765       0.104500   -9999.000000   -9999.000000       0.144000
50937     50937     neimenggu      121.4667       45.0500           60       206     2012      04        21        112              0.000000      15.618073       0.000000       0.227260       0.111500       0.033300       0.108200       0.094000
50937     50937     neimenggu      121.4667       45.0500           60       206     2012      04        22        113              0.000000      17.198700       0.000000       0.225053       0.103000       0.151600       0.093900       0.006000
50937     50937     neimenggu      121.4667       45.0500           60       206     2012      04        23        114              0.000000      18.583984       3.395801       0.218961       0.121500   -9999.000000       0.164200       0.216000
50937     50937     neimenggu      121.4667       45.0500           60       206     2012      04        24        115              0.000000      19.250702      18.558203       0.236518       0.147000       0.246900   -9999.000000   -9999.000000
50937     50937     neimenggu      121.4667       45.0500           60       206     2012      04        25        116              0.000000      11.446381       0.257708       0.337715       0.103000   -9999.000000       0.088400       0.173000
50937     50937     neimenggu      121.4667       45.0500           60       206     2012      04        26        117              0.000000      10.320740       0.000000       0.300298       0.102500   -9999.000000       0.100700       0.016000
50937     50937     neimenggu      121.4667       45.0500           60       206     2012      04        27        118              0.000000      12.542358       0.480591       0.285923       0.121000       0.128700       0.098200   -9999.000000
50937     50937     neimenggu      121.4667       45.0500           60       206     2012      04        28        119              0.000000      10.121185       0.000000       0.284211       0.112000       0.051000       0.099500       0.217000
50937     50937     neimenggu      121.4667       45.0500           60       206     2012      04        29        120              0.000000       8.908386       0.000000       0.277092       0.105000       0.095000       0.109100   -9999.000000
50937     50937     neimenggu      121.4667       45.0500           60       206     2012      04        30        121              0.000000      13.108337       1.816667       0.269735       0.102000       0.146400       0.089800       0.122000
50937     50937     neimenggu      121.4667       45.0500           60       206     2012      05        01        122              0.000000      14.668396       0.448473       0.262610       0.103000   -9999.000000       0.090400       0.023000
50937     50937     neimenggu      121.4667       45.0500           60       206     2012      05        02        123              0.000000      15.483795       0.000000       0.257128       0.113000   -9999.000000       0.095200   -9999.000000
50937     50937     neimenggu      121.4667       45.0500           60       206     2012      05        03        124              0.000000      16.372406       0.068045       0.257289       0.106000       0.137400       0.089200       0.139000
50937     50937     neimenggu      121.4667       45.0500           60       206     2012      05        04        125              0.000000      20.186127       0.000000       0.243000       0.091000   -9999.000000       0.097600       0.216000
50937     50937     neimenggu      121.4667       45.0500           60       206     2012      05        05        126              0.000000      17.990631       0.000000       0.233538       0.093000       0.070400       0.097800       0.199000
50937     50937     neimenggu      121.4667       45.0500           60       206     2012      05        06        127              0.000000      17.011566       0.123176       0.226321       0.103500       0.060800       0.086700       0.048000
50937     50937     neimenggu      121.4667       45.0500           60       206     2012      05        07        128              0.000000      18.203217       0.000000       0.220168   -9999.000000   -9999.000000       0.088000   -9999.000000
50937     50937     neimenggu      121.4667       45.0500           60       206     2012      05        08        129              0.000000      19.216827       0.000000       0.216350       0.102000   -9999.000000       0.097100       0.167000
50937     50937     neimenggu      121.4667       45.0500           60       206     2012      05        09        130              0.000000      18.904053       0.108361       0.214622       0.095500       0.028700       0.087300       0.203000
50937     50937     neimenggu      121.4667       45.0500           60       206     2012      05        10        131              0.000000      19.495026       0.000000       0.212062       0.092000   -9999.000000       0.092500       0.213000
50937     50937     neimenggu      121.4667       45.0500           60       206     2012      05        11        132              0.000000      19.873474       0.270646       0.208880       0.126500       0.075900   -9999.000000       0.098000
50937     50937     neimenggu      121.4667       45.0500           60       206     2012      05        12        133              0.000000      18.260559      13.478643       0.209891       0.250000       0.243900       0.205900       0.745000
50937     50937     neimenggu      121.4667       45.0500           60       206     2012      05        13        134              0.000000      13.722076       3.499021       0.305798   -9999.000000   -9999.000000       0.186400       0.589000
50937     50937     neimenggu      121.4667       45.0500           60       206     2012      05        14        135              0.000000      12.955811       0.000000       0.304543       0.171000       0.176600       0.123200       0.326000
50937     50937     neimenggu      121.4667       45.0500           60       206     2012      05        15        136              0.000000      12.595947       0.260854       0.289142       0.148000       0.163500       0.116400   -9999.000000
50937     50937     neimenggu      121.4667       45.0500           60       206     2012      05        16        137              0.000000      14.027161       6.371596       0.279841       0.286000       0.108000       0.176700       0.523000
50937     50937     neimenggu      121.4667       45.0500           60       206     2012      05        17        138              0.000000      11.384247       0.000000       0.312215       0.163500       0.207600       0.093900       0.418000
50937     50937     neimenggu      121.4667       45.0500           60       206     2012      05        18        139              0.000000      18.674103       0.000000       0.287388       0.145000       0.189800       0.088300       0.207000
50937     50937     neimenggu      121.4667       45.0500           60       206     2012      05        19        140              0.000000      22.070801       0.000000       0.270858       0.125000       0.106800       0.085000       0.223000
50937     50937     neimenggu      121.4667       45.0500           60       206     2012      05        20        141              0.000000      19.126404       0.000000       0.254746       0.110000   -9999.000000       0.086600       0.166000
50937     50937     neimenggu      121.4667       45.0500           60       206     2012      05        21        142              0.000000      22.347778       0.249251       0.244554       0.140000   -9999.000000       0.120000       0.158000
50937     50937     neimenggu      121.4667       45.0500           60       206     2012      05        22        143              0.000000      24.544006       4.828901       0.236485       0.197500       0.058800   -9999.000000       0.355000
50937     50937     neimenggu      121.4667       45.0500           60       206     2012      05        23        144              0.000000      17.386627       0.000000       0.278899   -9999.000000   -9999.000000       0.083700   -9999.000000
50937     50937     neimenggu      121.4667       45.0500           60       206     2012      05        24        145              0.000000      16.910767       0.000000       0.255291       0.186000       0.153000       0.086500       0.237000
50937     50937     neimenggu      121.4667       45.0500           60       206     2012      05        25        146              0.000000      17.053802       0.043364       0.244859       0.131000   -9999.000000       0.100600       0.135000
50937     50937     neimenggu      121.4667       45.0500           60       206     2012      05        26        147              0.000000      18.878784       0.000000       0.234448       0.140000   -9999.000000       0.089000   -9999.000000
50937     50937     neimenggu      121.4667       45.0500           60       206     2012      05        27        148              0.000000      19.545959       0.000000       0.229075       0.144500       0.056600       0.095400       0.259000
50937     50937     neimenggu      121.4667       45.0500           60       206     2012      05        28        149              0.000000      22.263458       0.000000       0.219326       0.155000   -9999.000000   -9999.000000   -9999.000000
50937     50937     neimenggu      121.4667       45.0500           60       206     2012      05        29        150              0.000000      22.476105       7.030245       0.212774   -9999.000000       0.072100       0.086400       0.551000
50937     50937     neimenggu      121.4667       45.0500           60       206     2012      05        30        151              0.000000      20.048950       0.056934       0.246673       0.170500       0.407400       0.099000   -9999.000000
50937     50937     neimenggu      121.4667       45.0500           60       206     2012      05        31        152              0.000000      18.519989       0.000000       0.264684       0.135000   -9999.000000       0.087700   -9999.000000
50937     50937     neimenggu      121.4667       45.0500           60       206     2012      06        01        153              0.000000      20.797363       3.771450       0.243900       0.202500       0.057900       0.161900       0.283000
50937     50937     neimenggu      121.4667       45.0500           60       206     2012      06        02        154              0.000000      19.850311       5.261974       0.251202       0.303000       0.403800       0.189200       0.627000
50937     50937     neimenggu      121.4667       45.0500           60       206     2012      06        03        155              0.000000      16.826965       1.468327       0.297262       0.227000       0.286200       0.122600       0.516000
50937     50937     neimenggu      121.4667       45.0500           60       206     2012      06        04        156              0.000000      20.118500       0.231400       0.276309       0.338500       0.332600       0.144100       0.412000
50937     50937     neimenggu      121.4667       45.0500           60       206     2012      06        05        157              0.000000      18.359863       0.282889       0.272891       0.226000       0.205400       0.096900   -9999.000000
50937     50937     neimenggu      121.4667       45.0500           60       206     2012      06        06        158              0.000000      22.782806       0.679927       0.258984       0.276000       0.129600       0.124900       0.410000
50937     50937     neimenggu      121.4667       45.0500           60       206     2012      06        07        159              0.000000      22.592499       1.812961       0.254618       0.219500   -9999.000000       0.108800       0.342000
50937     50937     neimenggu      121.4667       45.0500           60       206     2012      06        08        160              0.000000      23.857635       0.675324       0.254955       0.209000       0.212800   -9999.000000       0.329000
50937     50937     neimenggu      121.4667       45.0500           60       206     2012      06        09        161              0.000000      22.912170       0.000000       0.243982       0.214500       0.121900       0.080900       0.294000
50937     50937     neimenggu      121.4667       45.0500           60       206     2012      06        10        162              0.000000      20.550323       0.000000       0.237488       0.179000       0.084300       0.080400       0.289000
50937     50937     neimenggu      121.4667       45.0500           60       206     2012      06        11        163              0.000000      20.511200       0.647464       0.226170   -9999.000000       0.128800       0.132600       0.371000
50937     50937     neimenggu      121.4667       45.0500           60       206     2012      06        12        164              0.000000      18.453278      32.435684       0.230016       0.500000       0.566800       0.227200       0.809000
50937     50937     neimenggu      121.4667       45.0500           60       206     2012      06        13        165              0.000000      15.256500       0.000000       0.361195       0.419000   -9999.000000       0.216300   -9999.000000
50937     50937     neimenggu      121.4667       45.0500           60       206     2012      06        14        166              0.000000      18.312561      28.027836       0.323262       0.494000       0.229700   -9999.000000       0.652000
50937     50937     neimenggu      121.4667       45.0500           60       206     2012      06        15        167              0.000000      18.703796      11.261477       0.351946       0.495500       0.622000       0.254400       0.951000
50937     50937     neimenggu      121.4667       45.0500           60       206     2012      06        16        168              0.000000      17.045715       3.103464       0.371042       0.445000       0.315300       0.233300       0.693000
50937     50937     neimenggu      121.4667       45.0500           60       206     2012      06        17        169              0.000000      20.600006       6.799208       0.352520       0.472000       0.527000       0.216000       0.826000
50937     50937     neimenggu      121.4667       45.0500           60       206     2012      06        18        170              0.000000      20.144470       0.000000       0.357179       0.395000   -9999.000000       0.168200       0.743000
50937     50937     neimenggu      121.4667       45.0500           60       206     2012      06        19        171              0.000000      23.204285       0.000000       0.336946       0.294000       0.233100       0.134600       0.618000
50937     50937     neimenggu      121.4667       45.0500           60       206     2012      06        20        172              0.000000      24.933197       0.000000       0.324714       0.213500       0.204400       0.100400       0.529000
50937     50937     neimenggu      121.4667       45.0500           60       206     2012      06        21        173              0.000000      25.657471       1.369208       0.314952       0.211000   -9999.000000       0.096800   -9999.000000
50937     50937     neimenggu      121.4667       45.0500           60       206     2012      06        22        174              0.000000      26.240479       2.695601       0.306517       0.223000       0.294400       0.110100       0.664000
50937     50937     neimenggu      121.4667       45.0500           60       206     2012      06        23        175              0.000000      25.957001       0.760872       0.310326       0.225000       0.235600       0.098600       0.444000
50937     50937     neimenggu      121.4667       45.0500           60       206     2012      06        24        176              0.000000      25.558594       7.880508       0.304521       0.397000       0.104700       0.159200   -9999.000000
50937     50937     neimenggu      121.4667       45.0500           60       206     2012      06        25        177              0.000000      24.002258       0.106507       0.327003       0.329500       0.156900   -9999.000000       0.650000
50937     50937     neimenggu      121.4667       45.0500           60       206     2012      06        26        178              0.000000      25.275177      12.054550       0.316647       0.269000       0.135000       0.113200   -9999.000000
50937     50937     neimenggu      121.4667       45.0500           60       206     2012      06        27        179              0.000000      26.046814       3.815976       0.322472       0.382000       0.118500       0.176800       0.815000
50937     50937     neimenggu      121.4667       45.0500           60       206     2012      06        28        180              0.000000      24.288086       9.345727       0.343911       0.308500   -9999.000000       0.179400       0.730000
50937     50937     neimenggu      121.4667       45.0500           60       206     2012      06        29        181              0.000000      24.304047       0.927123       0.337200       0.313000       0.400600       0.158900   -9999.000000
50937     50937     neimenggu      121.4667       45.0500           60       206     2012      06        30        182              0.000000      23.736908       1.119201       0.338208       0.235000       0.154900       0.127700   -9999.000000
50937     50937     neimenggu      121.4667       45.0500           60       206     2012      07        01        183              0.000000      25.620575       0.730756       0.319727       0.388000   -9999.000000       0.119800       0.571000
50937     50937     neimenggu      121.4667       45.0500           60       206     2012      07        02        184              0.000000      20.840973       6.212394       0.321981       0.303000       0.167100       0.132300       0.869000
50937     50937     neimenggu      121.4667       45.0500           60       206     2012      07        03        185              0.000000      21.927338       4.878917       0.327606       0.422000       0.334500       0.210100       0.834000
50937     50937     neimenggu      121.4667       45.0500           60       206     2012      07        04        186              0.000000      21.454926       0.000000       0.340077       0.399000       0.240900       0.134500   -9999.000000
50937     50937     neimenggu      121.4667       45.0500           60       206     2012      07        05        187              0.000000      25.407990       0.140093       0.322559   -9999.000000       0.279700       0.133100       0.661000
50937     50937     neimenggu      121.4667       45.0500           60       206     2012      07        06        188              0.000000      26.450745       0.000000       0.313011   -9999.000000   -9999.000000       0.119300       0.591000
50937     50937     neimenggu      121.4667       45.0500           60       206     2012      07        07        189              0.000000      27.371887       0.545350       0.303445   -9999.000000   -9999.000000       0.099100       0.472000
50937     50937     neimenggu      121.4667       45.0500           60       206     2012      07        08        190              0.000000      28.340118       5.108374       0.295448       0.260500       0.379600       0.117600       0.585000
50937     50937     neimenggu      121.4667       45.0500           60       206     2012      07        09        191              0.000000      27.214233       0.436274       0.314879       0.217500       0.105600       0.131100       0.616000
50937     50937     neimenggu      121.4667       45.0500           60       206     2012      07        10        192              0.000000      27.606689      11.055668       0.304859   -9999.000000       0.278900       0.137900       0.623000
50937     50937     neimenggu      121.4667       45.0500           60       206     2012      07        11        193              0.000000      24.017761      37.266239       0.313854       0.440000   -9999.000000       0.209600       1.000000
50937     50937     neimenggu      121.4667       45.0500           60       206     2012      07        12        194              0.000000      21.247375       2.503943       0.386690       0.456000       0.273900   -9999.000000   -9999.000000
50937     50937     neimenggu      121.4667       45.0500           60       206     2012      07        13        195              0.000000      21.553375       0.000000       0.364545       0.365000       0.346500       0.151600       0.830000
50937     50937     neimenggu      121.4667       45.0500           60       206     2012      07        14        196              0.000000      24.258545       0.000000       0.344151       0.255500       0.186300       0.135100       0.777000
50937     50937     neimenggu      121.4667       45.0500           60       206     2012      07        15        197              0.000000      25.980408       0.000000       0.332733   -9999.000000       0.124500       0.122100       0.638000
50937     50937     neimenggu      121.4667       45.0500           60       206     2012      07        16        198              0.000000      27.349487       0.000000       0.323460       0.242500   -9999.000000       0.121800       0.625000
50937     50937     neimenggu      121.4667       45.0500           60       206     2012      07        17        199              0.000000      28.467651       0.000000       0.315604       0.206000       0.194400       0.126700       0.530000
50937     50937     neimenggu      121.4667       45.0500           60       206     2012      07        18        200              0.000000      27.962616       3.891320       0.306833       0.186000       0.195200       0.106600       0.565000
50937     50937     neimenggu      121.4667       45.0500           60       206     2012      07        19        201              0.000000      26.907593       0.000000       0.303566       0.215000   -9999.000000       0.110000       0.604000
50937     50937     neimenggu      121.4667       45.0500           60       206     2012      07        20        202              0.075000      28.272308       0.959942       0.297488       0.300000       0.072200       0.126400   -9999.000000
50937     50937     neimenggu      121.4667       45.0500           60       206     2012      07        21        203              0.110375      27.769684      19.590395       0.298100   -9999.000000       0.243500       0.160800       1.000000
50937     50937     neimenggu      121.4667       45.0500           60       206     2012      07        22        204              0.164333      26.975616      50.306343       0.333672   -9999.000000       0.323500       0.187000       1.000000
50937     50937     neimenggu      121.4667       45.0500           60       206     2012      07        23        205              0.127042      21.065216       0.000000       0.396803       0.459000       0.402000       0.198600   -9999.000000
50937     50937     neimenggu      121.4667       45.0500           60       206     2012      07        24        206              0.118042      25.339691       0.000000       0.358878       0.423000   -9999.000000       0.146700       0.812000
50937     50937     neimenggu      121.4667       45.0500           60       206     2012      07        25        207              0.112583      27.114288       1.584349       0.345517       0.372500       0.160600       0.150000   -9999.000000
50937     50937     neimenggu      121.4667       45.0500           60       206     2012      07        26        208              0.104958      27.429169       0.000000       0.342629       0.413000       0.161100       0.144800       0.648000
50937     50937     neimenggu      121.4667       45.0500           60       206     2012      07        27        209              0.098087      25.910065       0.000000       0.330463       0.375500       0.151600       0.127100       0.547000
50937     50937     neimenggu      121.4667       45.0500           60       206     2012      07        28        210              0.150542      26.904755      55.874542       0.322463   -9999.000000       0.366200       0.205700   -9999.000000
50937     50937     neimenggu      121.4667       45.0500           60       206     2012      07        29        211              0.136542      21.780609       1.574893       0.390625       0.482000   -9999.000000   -9999.000000       0.945000
50937     50937     neimenggu      121.4667       45.0500           60       206     2012      07        30        212              0.124208      20.603455       0.241485       0.369933       0.465000   -9999.000000       0.172500       0.762000
50937     50937     neimenggu      121.4667       45.0500           60       206     2012      07        31        213              0.118333      21.942505       0.000000       0.355199       0.491000   -9999.000000       0.163800       0.712000
50937     50937     neimenggu      121.4667       45.0500           60       206     2012      08        01        214              0.113333      23.906342       0.389717       0.345303       0.474000       0.170900       0.134700       0.700000
50937     50937     neimenggu      121.4667       45.0500           60       206     2012      08        02        215              0.109083      23.382233       0.000000       0.338813       0.429500       0.324500       0.139000   -9999.000000
50937     50937     neimenggu      121.4667       45.0500           60       206     2012      08        03        216              0.105000      23.221619       0.000000       0.334243       0.392000       0.163500       0.142700       0.650000
50937     50937     neimenggu      121.4667       45.0500           60       206     2012      08        04        217              0.100292      24.330261       0.000000       0.330689       0.405000       0.280500       0.123900       0.643000
50937     50937     neimenggu      121.4667       45.0500           60       206     2012      08        05        218              0.096917      25.566071       0.000000       0.325788       0.384000       0.247700       0.126500       0.628000
50937     50937     neimenggu      121.4667       45.0500           60       206     2012      08        06        219              0.092083      27.097046       0.000000       0.319167       0.475000   -9999.000000       0.151800       0.651000
50937     50937     neimenggu      121.4667       45.0500           60       206     2012      08        07        220              0.087750      27.918518       0.281916       0.312979       0.406000       0.099800   -9999.000000       0.622000
50937     50937     neimenggu      121.4667       45.0500           60       206     2012      08        08        221              0.084792      28.279114       0.665322       0.307572       0.366000   -9999.000000       0.160100       0.627000
50937     50937     neimenggu      121.4667       45.0500           60       206     2012      08        09        222              0.082870      25.283417       0.091698       0.307193       0.350000       0.137100   -9999.000000       0.664000
50937     50937     neimenggu      121.4667       45.0500           60       206     2012      08        10        223              0.080917      23.689301       1.813423       0.299433       0.390500       0.044000       0.139900   -9999.000000
50937     50937     neimenggu      121.4667       45.0500           60       206     2012      08        11        224              0.083875      22.365387       4.966680       0.305368   -9999.000000   -9999.000000       0.177100       0.550000
50937     50937     neimenggu      121.4667       45.0500           60       206     2012      08        12        225              0.087083      19.479462       0.000000       0.322365       0.488000       0.273400       0.153900       0.647000
50937     50937     neimenggu      121.4667       45.0500           60       206     2012      08        13        226              0.086667      21.904480       0.000000       0.310647       0.412000   -9999.000000       0.130200       0.636000
50937     50937     neimenggu      121.4667       45.0500           60       206     2012      08        14        227              0.085500      22.969971       0.128163       0.302282       0.352000       0.075900       0.147700       0.643000
50937     50937     neimenggu      121.4667       45.0500           60       206     2012      08        15        228              0.083542      23.524872       0.000000       0.298228       0.439000       0.268300   -9999.000000       0.490000
50937     50937     neimenggu      121.4667       45.0500           60       206     2012      08        16        229              0.081417      24.105042       0.000000       0.292040       0.433000   -9999.000000       0.123500       0.623000
50937     50937     neimenggu      121.4667       45.0500           60       206     2012      08        17        230              0.079042      25.290192       1.896501       0.286563       0.491000   -9999.000000       0.137300       0.836000
50937     50937     neimenggu      121.4667       45.0500           60       206     2012      08        18        231              0.076458      24.773621       0.000000       0.291185       0.446500   -9999.000000       0.131000   -9999.000000
50937     50937     neimenggu      121.4667       45.0500           60       206     2012      08        19        232              0.074917      22.593781       0.000000       0.287995       0.420000       0.107500       0.133600       0.637000
50937     50937     neimenggu      121.4667       45.0500           60       206     2012      08        20        233              0.073042      23.645874       0.000000       0.280264       0.446500       0.182000       0.134800       0.488000
50937     50937     neimenggu      121.4667       45.0500           60       206     2012      08        21        234              0.071917      18.707611       0.225014       0.278368       0.345500   -9999.000000       0.114900   -9999.000000
50937     50937     neimenggu      121.4667       45.0500           60       206     2012      08        22        235              0.070625      19.385590       0.000000       0.273511       0.412000   -9999.000000       0.123000   -9999.000000
50937     50937     neimenggu      121.4667       45.0500           60       206     2012      08        23        236              0.070250      19.626434       0.000000       0.269023       0.413000   -9999.000000       0.138800   -9999.000000
50937     50937     neimenggu      121.4667       45.0500           60       206     2012      08        24        237              0.069708      22.688965       0.000000       0.265769       0.392000   -9999.000000       0.122300   -9999.000000
50937     50937     neimenggu      121.4667       45.0500           60       206     2012      08        25        238              0.000000      24.377960       0.000000       0.261554       0.336000   -9999.000000       0.137300   -9999.000000
50937     50937     neimenggu      121.4667       45.0500           60       206     2012      08        26        239              0.068667      24.896362       0.000000       0.256914       0.364500   -9999.000000   -9999.000000   -9999.000000
50937     50937     neimenggu      121.4667       45.0500           60       206     2012      08        27        240              0.068250      25.279144       0.000000       0.252293       0.438000       0.107100       0.115700       0.604000
50937     50937     neimenggu      121.4667       45.0500           60       206     2012      08        28        241              0.067583      24.970459       0.000000       0.250870       0.419000   -9999.000000       0.119800       0.583000
50937     50937     neimenggu      121.4667       45.0500           60       206     2012      08        29        242              0.066583      25.653473       0.000000       0.247394       0.356000   -9999.000000       0.123400       0.559000
50937     50937     neimenggu      121.4667       45.0500           60       206     2012      08        30        243              0.066083      23.796692       0.000000       0.237596       0.307000       0.053400       0.128000       0.469000
50937     50937     neimenggu      121.4667       45.0500           60       206     2012      08        31        244              0.065500      25.137848       0.000000       0.233343       0.362500       0.166400       0.131100   -9999.000000
50937     50937     neimenggu      121.4667       45.0500           60       206     2012      09        01        245              0.065417      27.373840       0.904906       0.230977       0.240000       0.078000   -9999.000000       0.578000
50937     50937     neimenggu      121.4667       45.0500           60       206     2012      09        02        246              0.097417      26.791870      12.944773       0.228872       0.493000       0.025100       0.142300       0.877000
50937     50937     neimenggu      121.4667       45.0500           60       206     2012      09        03        247              0.111583      17.724640       0.950033       0.306404       0.488000   -9999.000000       0.177300       0.834000
50937     50937     neimenggu      121.4667       45.0500           60       206     2012      09        04        248              0.109292      17.362000       1.297831       0.295273       0.425000   -9999.000000       0.130700       0.667000
50937     50937     neimenggu      121.4667       45.0500           60       206     2012      09        05        249              0.107833      15.893250       0.000000       0.295458       0.417000   -9999.000000       0.141200       0.762000
50937     50937     neimenggu      121.4667       45.0500           60       206     2012      09        06        250              0.105000      18.365387       0.000000       0.284155       0.358000       0.178600       0.129400       0.542000
50937     50937     neimenggu      121.4667       45.0500           60       206     2012      09        07        251              0.103042      20.756805       0.000000       0.275366       0.393000       0.234500       0.116400       0.560000
50937     50937     neimenggu      121.4667       45.0500           60       206     2012      09        08        252              0.101125      22.223602       0.000000       0.270535       0.385000   -9999.000000       0.119600   -9999.000000
50937     50937     neimenggu      121.4667       45.0500           60       206     2012      09        09        253              0.099292      22.107544       0.000000       0.266347       0.325000       0.329700       0.129000       0.390000
50937     50937     neimenggu      121.4667       45.0500           60       206     2012      09        10        254              0.098083      21.996521       0.233492       0.259602       0.302000   -9999.000000       0.105200       0.550000
50937     50937     neimenggu      121.4667       45.0500           60       206     2012      09        11        255              0.121625      23.385681      19.961493       0.255174       0.336000       0.106500       0.162000       0.986000
50937     50937     neimenggu      121.4667       45.0500           60       206     2012      09        12        256              0.132333      17.791168       1.319256       0.320023       0.422500   -9999.000000   -9999.000000       0.740000
50937     50937     neimenggu      121.4667       45.0500           60       206     2012      09        13        257              0.127125      14.042084       0.635919       0.324244       0.440000       0.201900       0.166800       0.833000
50937     50937     neimenggu      121.4667       45.0500           60       206     2012      09        14        258              0.122000      14.880646       0.000000       0.313029       0.325500       0.325100       0.154200       0.583000
50937     50937     neimenggu      121.4667       45.0500           60       206     2012      09        15        259              0.117875      16.798859       0.000000       0.303190   -9999.000000       0.214200       0.111700       0.675000
50937     50937     neimenggu      121.4667       45.0500           60       206     2012      09        16        260              0.114917      18.326447       0.000000       0.296280       0.291500   -9999.000000       0.111300   -9999.000000
50937     50937     neimenggu      121.4667       45.0500           60       206     2012      09        17        261              0.112750      18.320038       0.000000       0.290521       0.249000       0.162600       0.117800       0.529000
50937     50937     neimenggu      121.4667       45.0500           60       206     2012      09        18        262              0.110875      18.428375       0.000000       0.285045       0.281000   -9999.000000       0.106500       0.490000
50937     50937     neimenggu      121.4667       45.0500           60       206     2012      09        19        263              0.109167      18.830597       0.089574       0.280594       0.271000       0.154500       0.108600   -9999.000000
50937     50937     neimenggu      121.4667       45.0500           60       206     2012      09        20        264              0.107583      19.174622       0.199090       0.277530       0.248000       0.152400       0.110700       0.413000
50937     50937     neimenggu      121.4667       45.0500           60       206     2012      09        21        265              0.106522      19.819427       0.000000       0.275238   -9999.000000   -9999.000000       0.112400   -9999.000000
50937     50937     neimenggu      121.4667       45.0500           60       206     2012      09        22        266              0.117292      20.709686       7.296954       0.271472       0.228000       0.043100       0.149500       0.823000
50937     50937     neimenggu      121.4667       45.0500           60       206     2012      09        23        267              0.121333      19.584747       0.000000       0.300115       0.266000       0.336500       0.142500       0.719000
50937     50937     neimenggu      121.4667       45.0500           60       206     2012      09        24        268              0.115958      18.364044       0.000000       0.296587       0.250000       0.173500       0.109600   -9999.000000
50937     50937     neimenggu      121.4667       45.0500           60       206     2012      09        25        269              0.130958      16.889008       7.213253       0.289792       0.286000       0.449600       0.111400       0.834000
50937     50937     neimenggu      121.4667       45.0500           60       206     2012      09        26        270              0.128292      15.117615       0.635347       0.316791       0.256000       0.532600       0.118800       0.527000
50937     50937     neimenggu      121.4667       45.0500           60       206     2012      09        27        271              0.159143      15.293884      63.964001       0.304711   -9999.000000       0.248000       0.110700       0.979000
50937     50937     neimenggu      121.4667       45.0500           60       206     2012      09        28        272              0.150600      11.122375       7.305542       0.391523   -9999.000000   -9999.000000       0.180600       0.858000
50937     50937     neimenggu      121.4667       45.0500           60       206     2012      09        29        273              0.134167      10.429169       0.000000       0.377933   -9999.000000   -9999.000000   -9999.000000   -9999.000000
50937     50937     neimenggu      121.4667       45.0500           60       206     2012      09        30        274              0.126917      11.672699       0.000000       0.354677       0.309500   -9999.000000       0.143800       0.685000
50937     50937     neimenggu      121.4667       45.0500           60       206     2012      10        01        275              0.122625      13.201111       0.000000       0.345941       0.210000   -9999.000000       0.139500       0.579000
50937     50937     neimenggu      121.4667       45.0500           60       206     2012      10        02        276              0.120333      15.158142      12.014797       0.339780       0.195000       0.300300       0.104400       0.724000
50937     50937     neimenggu      121.4667       45.0500           60       206     2012      10        03        277              0.119417      15.940613      30.940517       0.353179       0.220500       0.144500       0.101700       0.643000
50937     50937     neimenggu      121.4667       45.0500           60       206     2012      10        04        278              0.117375      12.579742       0.000000       0.348869       0.243000   -9999.000000       0.122100       0.737000
50937     50937     neimenggu      121.4667       45.0500           60       206     2012      10        05        279              0.114875      13.692627       0.000000       0.338763       0.213000       0.197800       0.101400       0.526000
50937     50937     neimenggu      121.4667       45.0500           60       206     2012      10        06        280              0.113167      12.037689       0.000000       0.332622       0.180000       0.162900       0.103500       0.496000
50937     50937     neimenggu      121.4667       45.0500           60       206     2012      10        07        281              0.112083      12.678406       0.000000       0.329787       0.168000       0.166700       0.110500   -9999.000000
50937     50937     neimenggu      121.4667       45.0500           60       206     2012      10        08        282              0.111125      14.576996       0.000000       0.327720       0.189000       0.133000       0.089000       0.448000
50937     50937     neimenggu      121.4667       45.0500           60       206     2012      10        09        283              0.115333      15.766663       2.539762       0.325876       0.189000   -9999.000000       0.110800       0.801000
50937     50937     neimenggu      121.4667       45.0500           60       206     2012      10        10        284              0.114833      10.520874       7.238421       0.332671   -9999.000000   -9999.000000   -9999.000000       0.427000
50937     50937     neimenggu      121.4667       45.0500           60       206     2012      10        11        285              0.113250       8.703125       0.000000       0.325492       0.173000       0.202400       0.106400       0.587000
50937     50937     neimenggu      121.4667       45.0500           60       206     2012      10        12        286              0.121208      10.090790       1.966990       0.323682       0.167000       0.149200       0.106000       0.502000
50937     50937     neimenggu      121.4667       45.0500           60       206     2012      10        13        287              0.127833       8.797699       0.529241       0.327007       0.195000       0.522400       0.111600       0.576000
50937     50937     neimenggu      121.4667       45.0500           60       206     2012      10        14        288              0.121375       7.488983       0.347634       0.325519       0.149000       0.383100       0.099300       0.511000
50937     50937     neimenggu      121.4667       45.0500           60       206     2012      10        15        289              0.118667       7.237213       3.235753       0.322234   -9999.000000       0.216700       0.111700   -9999.000000
50937     50937     neimenggu      121.4667       45.0500           60       206     2012      10        16        290              0.133458       8.062195       6.430091       0.327062   -9999.000000       0.305600   -9999.000000       0.765000
50937     50937     neimenggu      121.4667       45.0500           60       206     2012      10        17        291              0.126042       4.927673       0.000000       0.345771       0.234000       0.207000       0.134600       0.762000
50937     50937     neimenggu      121.4667       45.0500           60       206     2012      10        18        292              0.121375       4.233063       0.000000       0.331255       0.190000       0.283700       0.125300   -9999.000000
50937     50937     neimenggu      121.4667       45.0500           60       206     2012      10        19        293              0.118917       3.372223       1.192674       0.311066       0.169000       0.165100       0.094900       0.620000
50937     50937     neimenggu      121.4667       45.0500           60       206     2012      10        20        294              0.116042       5.180237       1.024716       0.324295   -9999.000000   -9999.000000       0.085300   -9999.000000
50937     50937     neimenggu      121.4667       45.0500           60       206     2012      10        21        295              0.114500       2.868866       0.644472       0.306645   -9999.000000       0.339400       0.095200       0.454000
50937     50937     neimenggu      121.4667       45.0500           60       206     2012      10        22        296              0.113250       3.131775       0.000000       0.316370   -9999.000000   -9999.000000       0.090600       0.381000
50937     50937     neimenggu      121.4667       45.0500           60       206     2012      10        23        297              0.111833       4.748901      23.842545       0.321749   -9999.000000       0.126200       0.095000   -9999.000000
50937     50937     neimenggu      121.4667       45.0500           60       206     2012      10        24        298              0.111000       6.001221       9.343222       0.322282   -9999.000000       0.194000       0.102200       0.486000
50937     50937     neimenggu      121.4667       45.0500           60       206     2012      10        25        299              0.000000       6.994110       0.952844       0.321221       0.148000       0.245900       0.079000       0.391000
50937     50937     neimenggu      121.4667       45.0500           60       206     2012      10        26        300              0.109917       7.836639       0.802124       0.320227       0.147000       0.337900       0.094500       0.415000
50937     50937     neimenggu      121.4667       45.0500           60       206     2012      10        27        301              0.108583       9.577118       0.000000       0.320152       0.149000   -9999.000000   -9999.000000       0.361000
50937     50937     neimenggu      121.4667       45.0500           60       206     2012      10        28        302              0.000000       6.752686       0.755318       0.313584       0.143000       0.257000       0.083900   -9999.000000
50937     50937     neimenggu      121.4667       45.0500           60       206     2012      10        29        303              0.104958       2.909668       1.961032       0.293079       0.139000       0.443500       0.085100       0.322000
50937     50937     neimenggu      121.4667       45.0500           60       206     2012      10        30        304              0.101792       0.387695       3.256290       0.254863   -9999.000000       0.079400       0.064600       0.160000
50937     50937     neimenggu      121.4667       45.0500           60       206     2012      10        31        305              0.099625      -1.580994       2.517350       0.198017   -9999.000000       0.163200       0.070400       0.254000
50937     50937     neimenggu      121.4667       45.0500           60       206     2012      11        01        306              0.099292      -1.323547       0.000000       0.202994   -9999.000000       0.079700       0.078800       0.206000
50937     50937     neimenggu      121.4667       45.0500           60       206     2012      11        02        307              0.101958      -0.421112       0.000000       0.218865   -9999.000000       0.104700   -9999.000000       0.337000
50937     50937     neimenggu      121.4667       45.0500           60       206     2012      11        03        308              0.103000       0.136353       0.000000       0.225006   -9999.000000   -9999.000000       0.077000       0.284000
50937     50937     neimenggu      121.4667       45.0500           60       206     2012      11        04        309              0.103000      -0.081024       0.000000       0.218462   -9999.000000       0.111200       0.084900       0.364000
50937     50937     neimenggu      121.4667       45.0500           60       206     2012      11        05        310              0.101667      -0.270813       0.000000       0.207229       0.119000   -9999.000000       0.070300   -9999.000000
50937     50937     neimenggu      121.4667       45.0500           60       206     2012      11        06        311              0.096417       0.079132       0.000000       0.230992   -9999.000000   -9999.000000       0.076900       0.214000
50937     50937     neimenggu      121.4667       45.0500           60       206     2012      11        07        312              0.096875      -0.140869       0.383609       0.227773       0.139000       0.118500       0.077400       0.243000
50937     50937     neimenggu      121.4667       45.0500           60       206     2012      11        08        313              0.097417       0.607391       0.000000       0.239063       0.128000       0.185000   -9999.000000       0.219000
50937     50937     neimenggu      121.4667       45.0500           60       206     2012      11        09        314              0.095167       0.470032       0.000000       0.244512       0.133000   -9999.000000       0.076300       0.124000
50937     50937     neimenggu      121.4667       45.0500           60       206     2012      11        10        315              0.098333       0.535797       0.509758       0.245190   -9999.000000       0.103700       0.072600       0.144000
50937     50937     neimenggu      121.4667       45.0500           60       206     2012      11        11        316              0.101000       0.396759       0.075864       0.241506   -9999.000000   -9999.000000       0.068300       0.125000
50937     50937     neimenggu      121.4667       45.0500           60       206     2012      11        12        317              0.097875      -0.269257       0.000000       0.209816   -9999.000000   -9999.000000       0.071900       0.226000
50937     50937     neimenggu      121.4667       45.0500           60       206     2012      11        13        318              0.000000      -1.907654       0.000000       0.186250   -9999.000000       0.080300   -9999.000000   -9999.000000
50937     50937     neimenggu      121.4667       45.0500           60       206     2012      11        14        319              0.079208      -2.710571       0.000000       0.170189   -9999.000000   -9999.000000       0.058800       0.216000
50937     50937     neimenggu      121.4667       45.0500           60       206     2012      11        15        320              0.080208      -2.771698       0.000000       0.179100   -9999.000000       0.067000       0.073100       0.265000
50937     50937     neimenggu      121.4667       45.0500           60       206     2012      11        16        321              0.079292      -1.448090       0.000000       0.185768   -9999.000000       0.151200       0.063100   -9999.000000
50937     50937     neimenggu      121.4667       45.0500           60       206     2012      11        17        322              0.000000      -2.392578       0.000000       0.182429   -9999.000000       0.028300       0.068200       0.264000
50937     50937     neimenggu      121.4667       45.0500           60       206     2012      11        18        323              0.071417      -3.606781       4.123147       0.172290   -9999.000000       0.065400       0.067800   -9999.000000
50937     50937     neimenggu      121.4667       45.0500           60       206     2012      11        19        324              0.071417      -5.112152       0.178298       0.154040   -9999.000000       0.139600       0.050700       0.166000
50937     50937     neimenggu      121.4667       45.0500           60       206     2012      11        20        325              0.071375      -5.056000       0.000000       0.153056   -9999.000000       0.095900       0.053400       0.090000
50937     50937     neimenggu      121.4667       45.0500           60       206     2012      11        21        326              0.071208      -4.700012       0.000000       0.157111   -9999.000000       0.130000       0.062500   -9999.000000
50937     50937     neimenggu      121.4667       45.0500           60       206     2012      11        22        327              0.070167      -3.315887       0.000000       0.166632   -9999.000000   -9999.000000       0.058400       0.214000
50937     50937     neimenggu      121.4667       45.0500           60       206     2012      11        23        328              0.069083      -5.905731       0.000000       0.153312   -9999.000000       0.103400       0.062700       0.138000
50937     50937     neimenggu      121.4667       45.0500           60       206     2012      11        24        329              0.069042      -6.497101       0.000000       0.148681   -9999.000000       0.115000   -9999.000000       0.184000
50937     50937     neimenggu      121.4667       45.0500           60       206     2012      11        25        330              0.068667      -5.715454       0.000000       0.148553   -9999.000000       0.135800       0.050900       0.093000
50937     50937     neimenggu      121.4667       45.0500           60       206     2012      11        26        331              0.068208      -6.450623       0.000000       0.148499   -9999.000000       0.110300       0.059800   -9999.000000
50937     50937     neimenggu      121.4667       45.0500           60       206     2012      11        27        332              0.068292      -7.882416       0.000000       0.146956   -9999.000000   -9999.000000       0.067800       0.204000
50937     50937     neimenggu      121.4667       45.0500           60       206     2012      11        28        333              0.067417      -8.173737       0.000000       0.145331   -9999.000000   -9999.000000       0.061900       0.163000
50937     50937     neimenggu      121.4667       45.0500           60       206     2012      11        29        334              0.066833      -9.024292       0.000000       0.144875   -9999.000000       0.139600       0.073400       0.141000
50937     50937     neimenggu      121.4667       45.0500           60       206     2012      11        30        335              0.066333     -11.215759       0.000000       0.141996   -9999.000000       0.099700   -9999.000000       0.111000
50937     50937     neimenggu      121.4667       45.0500           60       206     2012      12        01        336              0.066833     -12.915436       0.000000       0.139407   -9999.000000   -9999.000000       0.057900       0.135000
50937     50937     neimenggu      121.4667       45.0500           60       206     2012      12        02        337              0.067667     -11.095367       0.000000       0.139125   -9999.000000   -9999.000000       0.062800       0.182000
50937     50937     neimenggu      121.4667       45.0500           60       206     2012      12        03        338              0.066500      -9.012177       0.000000       0.140344   -9999.000000   -9999.000000       0.059600       0.148000
50937     50937     neimenggu      121.4667       45.0500           60       206     2012      12        04        339              0.066333     -12.176971       0.000000       0.139437   -9999.000000       0.133500       0.064600   -9999.000000
50937     50937     neimenggu      121.4667       45.0500           60       206     2012      12        05        340              0.066000     -11.981445       0.000000       0.139267   -9999.000000       0.013600       0.071200       0.016000
50937     50937     neimenggu      121.4667       45.0500           60       206     2012      12        06        341              0.065708     -13.875885       0.000000       0.138498   -9999.000000   -9999.000000       0.058800       0.188000
50937     50937     neimenggu      121.4667       45.0500           60       206     2012      12        07        342              0.065417     -15.228119       0.000000       0.137387   -9999.000000   -9999.000000       0.063700       0.036000
50937     50937     neimenggu      121.4667       45.0500           60       206     2012      12        08        343              0.065792     -16.746948       0.000000       0.135834   -9999.000000   -9999.000000       0.072600       0.110000
50937     50937     neimenggu      121.4667       45.0500           60       206     2012      12        09        344              0.066000     -14.008453       0.000000       0.136003   -9999.000000   -9999.000000       0.067900       0.086000
50937     50937     neimenggu      121.4667       45.0500           60       206     2012      12        10        345              0.066333     -11.176117       0.000000       0.137410   -9999.000000   -9999.000000       0.072300       0.030000
50937     50937     neimenggu      121.4667       45.0500           60       206     2012      12        11        346              0.066167     -10.577637       0.000000       0.137026   -9999.000000   -9999.000000   -9999.000000       0.156000
50937     50937     neimenggu      121.4667       45.0500           60       206     2012      12        12        347              0.066000     -11.131500       0.000000       0.136595   -9999.000000   -9999.000000       0.061600   -9999.000000
50937     50937     neimenggu      121.4667       45.0500           60       206     2012      12        13        348              0.066000     -11.232269       0.000000       0.136314   -9999.000000   -9999.000000       0.069000       0.180000
50937     50937     neimenggu      121.4667       45.0500           60       206     2012      12        14        349              0.066083     -10.533020       0.000000       0.136824   -9999.000000   -9999.000000       0.063800       0.059000
50937     50937     neimenggu      121.4667       45.0500           60       206     2012      12        15        350              0.000000     -11.153046       0.000000       0.136601   -9999.000000   -9999.000000       0.066200   -9999.000000
50937     50937     neimenggu      121.4667       45.0500           60       206     2012      12        16        351              0.066000     -12.920227       0.413074       0.136165   -9999.000000   -9999.000000       0.070300       0.111000
50937     50937     neimenggu      121.4667       45.0500           60       206     2012      12        17        352              0.066000     -13.291931       0.000000       0.136050   -9999.000000   -9999.000000   -9999.000000   -9999.000000
50937     50937     neimenggu      121.4667       45.0500           60       206     2012      12        18        353              0.066000     -14.985077      15.947799       0.135357   -9999.000000   -9999.000000       0.061200       0.118000
50937     50937     neimenggu      121.4667       45.0500           60       206     2012      12        19        354              0.066000     -14.916534       3.220540       0.135181   -9999.000000   -9999.000000       0.069700       0.045000
50937     50937     neimenggu      121.4667       45.0500           60       206     2012      12        20        355              0.000000     -12.802765       0.171835       0.135689   -9999.000000   -9999.000000       0.061700   -9999.000000
50937     50937     neimenggu      121.4667       45.0500           60       206     2012      12        21        356              0.066000     -11.118134       0.000000       0.136543   -9999.000000   -9999.000000       0.071000       0.155000
50937     50937     neimenggu      121.4667       45.0500           60       206     2012      12        22        357              0.065542     -13.840668       0.000000       0.135836   -9999.000000   -9999.000000       0.076800       0.088000
50937     50937     neimenggu      121.4667       45.0500           60       206     2012      12        23        358              0.065083     -18.158875       0.000000       0.133858   -9999.000000   -9999.000000   -9999.000000       0.142000
50937     50937     neimenggu      121.4667       45.0500           60       206     2012      12        24        359              0.065000     -19.375244       0.000000       0.131134   -9999.000000   -9999.000000       0.069700       0.034000
50937     50937     neimenggu      121.4667       45.0500           60       206     2012      12        25        360              0.065000     -18.232193       0.198352       0.131746   -9999.000000   -9999.000000       0.082800   -9999.000000
50937     50937     neimenggu      121.4667       45.0500           60       206     2012      12        26        361              0.000000     -19.295761       0.122333       0.131851   -9999.000000   -9999.000000       0.070800       0.179000
50937     50937     neimenggu      121.4667       45.0500           60       206     2012      12        27        362              0.065500     -16.702545       0.219606       0.132262   -9999.000000   -9999.000000       0.079200       0.141000
50937     50937     neimenggu      121.4667       45.0500           60       206     2012      12        28        363              0.000000     -15.225494       4.289280       0.133044   -9999.000000   -9999.000000   -9999.000000       0.152000
50937     50937     neimenggu      121.4667       45.0500           60       206     2012      12        29        364              0.000000     -13.870239       0.645942       0.133619   -9999.000000   -9999.000000   -9999.000000       0.094000
50937     50937     neimenggu      121.4667       45.0500           60       206     2012      12        30        365              0.000000     -12.016907      40.345829       0.134473   -9999.000000   -9999.000000       0.075300       0.005000
50937     50937     neimenggu      121.4667       45.0500           60       206     2012      12        31        366              0.065133     -10.567261       3.456466       0.134866   -9999.000000   -9999.000000       0.066800       0.007000
