# Supplementary material for: Research on Fusing Multisatellite Soil Moisture Data Based on Bayesian Model Averaging
Source: Hindawi journal article supplement (doi:10.1155/2018/9310838), 2018-06-25
Supplement: f1 [file 9310838.f1.zip › 2012_sm00-10cm_daily_ZDB_ZHY_52679_366days_allin.txt]

52679     52679     gansu          102.8833       37.8833           88       132     2012      01        01        001              0.000000   -9999.000000       0.000000   -9999.000000   -9999.000000   -9999.000000   -9999.000000   -9999.000000
52679     52679     gansu          102.8833       37.8833           88       132     2012      01        02        002              0.014792      -7.212555       0.000000       0.124346   -9999.000000   -9999.000000       0.067400   -9999.000000
52679     52679     gansu          102.8833       37.8833           88       132     2012      01        03        003              0.000000      -8.529938       0.000000       0.122709   -9999.000000   -9999.000000       0.068000       0.193000
52679     52679     gansu          102.8833       37.8833           88       132     2012      01        04        004              0.014250     -10.047119       0.000000       0.117735   -9999.000000   -9999.000000       0.052000       0.014000
52679     52679     gansu          102.8833       37.8833           88       132     2012      01        05        005              0.014250      -9.975922       0.000000       0.117255   -9999.000000   -9999.000000       0.057700       0.197000
52679     52679     gansu          102.8833       37.8833           88       132     2012      01        06        006              0.014318      -9.387238       0.000000       0.118894   -9999.000000   -9999.000000       0.058500       0.033000
52679     52679     gansu          102.8833       37.8833           88       132     2012      01        07        007              0.014348      -8.282318       0.000000       0.123587   -9999.000000   -9999.000000       0.071900   -9999.000000
52679     52679     gansu          102.8833       37.8833           88       132     2012      01        08        008              0.000000      -7.822235       0.000000       0.128158   -9999.000000   -9999.000000       0.058300       0.011000
52679     52679     gansu          102.8833       37.8833           88       132     2012      01        09        009              0.014375      -7.564331       0.000000       0.129416   -9999.000000   -9999.000000   -9999.000000       0.044000
52679     52679     gansu          102.8833       37.8833           88       132     2012      01        10        010              0.014333      -7.342316       0.000000       0.130900   -9999.000000   -9999.000000   -9999.000000       0.176000
52679     52679     gansu          102.8833       37.8833           88       132     2012      01        11        011              0.014217      -8.019745       0.000000       0.127410   -9999.000000   -9999.000000       0.059700   -9999.000000
52679     52679     gansu          102.8833       37.8833           88       132     2012      01        12        012              0.014333      -8.580048       0.000000       0.123211   -9999.000000   -9999.000000   -9999.000000   -9999.000000
52679     52679     gansu          102.8833       37.8833           88       132     2012      01        13        013              0.014542      -7.532471       0.000000       0.128298   -9999.000000   -9999.000000       0.068100       0.038000
52679     52679     gansu          102.8833       37.8833           88       132     2012      01        14        014              0.014542      -7.185394       0.000000       0.127510   -9999.000000   -9999.000000       0.069600   -9999.000000
52679     52679     gansu          102.8833       37.8833           88       132     2012      01        15        015              0.014609      -6.563782       0.000000       0.135158   -9999.000000   -9999.000000       0.038300       0.052000
52679     52679     gansu          102.8833       37.8833           88       132     2012      01        16        016              0.014833      -5.827240       0.000000       0.135147       0.086000       0.067400       0.067800       0.062000
52679     52679     gansu          102.8833       37.8833           88       132     2012      01        17        017              0.000000      -4.473907       0.000000       0.143436   -9999.000000   -9999.000000       0.059900       0.006000
52679     52679     gansu          102.8833       37.8833           88       132     2012      01        18        018              0.015208      -4.614960       0.000000       0.141014   -9999.000000   -9999.000000   -9999.000000       0.099000
52679     52679     gansu          102.8833       37.8833           88       132     2012      01        19        019              0.015000      -4.436340       0.000000       0.141907   -9999.000000   -9999.000000       0.050600       0.155000
52679     52679     gansu          102.8833       37.8833           88       132     2012      01        20        020              0.015000      -6.539215       0.000000       0.129729   -9999.000000   -9999.000000       0.047600       0.010000
52679     52679     gansu          102.8833       37.8833           88       132     2012      01        21        021              0.014783     -11.347778       0.000000       0.121486   -9999.000000   -9999.000000       0.036400   -9999.000000
52679     52679     gansu          102.8833       37.8833           88       132     2012      01        22        022              0.014174     -15.393524       0.000000       0.115671   -9999.000000   -9999.000000       0.040500       0.079000
52679     52679     gansu          102.8833       37.8833           88       132     2012      01        23        023              0.014000     -16.105469       0.000000       0.113673   -9999.000000   -9999.000000       0.040300       0.016000
52679     52679     gansu          102.8833       37.8833           88       132     2012      01        24        024              0.014000     -15.568634       0.000000       0.112964   -9999.000000   -9999.000000       0.042700       0.183000
52679     52679     gansu          102.8833       37.8833           88       132     2012      01        25        025              0.014042     -14.811035       0.000000       0.112716   -9999.000000   -9999.000000       0.037000       0.164000
52679     52679     gansu          102.8833       37.8833           88       132     2012      01        26        026              0.014208     -12.729401       0.000000       0.113350   -9999.000000   -9999.000000       0.043700   -9999.000000
52679     52679     gansu          102.8833       37.8833           88       132     2012      01        27        027              0.014417     -11.474365       0.000000       0.114157   -9999.000000   -9999.000000       0.035400   -9999.000000
52679     52679     gansu          102.8833       37.8833           88       132     2012      01        28        028              0.014500     -10.395966       0.000000       0.114559   -9999.000000   -9999.000000       0.038600       0.012000
52679     52679     gansu          102.8833       37.8833           88       132     2012      01        29        029              0.014542      -9.689087       0.000000       0.115514   -9999.000000   -9999.000000   -9999.000000       0.081000
52679     52679     gansu          102.8833       37.8833           88       132     2012      01        30        030              0.014750      -8.580750       0.000000       0.118910   -9999.000000   -9999.000000       0.042400       0.034000
52679     52679     gansu          102.8833       37.8833           88       132     2012      01        31        031              0.014833      -5.840454       0.000000       0.135616   -9999.000000   -9999.000000       0.048300   -9999.000000
52679     52679     gansu          102.8833       37.8833           88       132     2012      02        01        032              0.014583      -5.234650       0.000000       0.140804   -9999.000000   -9999.000000   -9999.000000       0.074000
52679     52679     gansu          102.8833       37.8833           88       132     2012      02        02        033              0.014625      -8.740326       0.000000       0.121306   -9999.000000   -9999.000000       0.046200       0.090000
52679     52679     gansu          102.8833       37.8833           88       132     2012      02        03        034              0.014833      -7.407135       0.000000       0.125917   -9999.000000   -9999.000000       0.043800       0.036000
52679     52679     gansu          102.8833       37.8833           88       132     2012      02        04        035              0.015000      -5.807709       0.000000       0.133836   -9999.000000   -9999.000000   -9999.000000       0.005000
52679     52679     gansu          102.8833       37.8833           88       132     2012      02        05        036              0.015167      -4.180847       0.000000       0.145093       0.079000   -9999.000000       0.046600   -9999.000000
52679     52679     gansu          102.8833       37.8833           88       132     2012      02        06        037              0.014583      -3.603668       0.000000       0.149436   -9999.000000   -9999.000000       0.049800       0.020000
52679     52679     gansu          102.8833       37.8833           88       132     2012      02        07        038              0.014417      -8.619904       0.000000       0.123512   -9999.000000   -9999.000000       0.039500       0.113000
52679     52679     gansu          102.8833       37.8833           88       132     2012      02        08        039              0.014353      -9.194763       0.000000       0.119852   -9999.000000   -9999.000000       0.044900       0.143000
52679     52679     gansu          102.8833       37.8833           88       132     2012      02        09        040              0.014500      -9.916351       0.000000       0.118986   -9999.000000   -9999.000000       0.049200       0.123000
52679     52679     gansu          102.8833       37.8833           88       132     2012      02        10        041              0.014583      -9.073273       0.000000       0.120539   -9999.000000   -9999.000000       0.051200   -9999.000000
52679     52679     gansu          102.8833       37.8833           88       132     2012      02        11        042              0.014833      -5.929504       0.000000       0.135242       0.080000   -9999.000000       0.047600       0.115000
52679     52679     gansu          102.8833       37.8833           88       132     2012      02        12        043              0.015458      -3.788055       0.000000       0.146144       0.084000   -9999.000000       0.033200       0.211000
52679     52679     gansu          102.8833       37.8833           88       132     2012      02        13        044              0.016042      -2.732544       0.000000       0.150872       0.079000       0.073600       0.054100       0.118000
52679     52679     gansu          102.8833       37.8833           88       132     2012      02        14        045              0.015708      -1.821503       0.000000       0.155480   -9999.000000   -9999.000000   -9999.000000       0.062000
52679     52679     gansu          102.8833       37.8833           88       132     2012      02        15        046              0.015375      -2.388123       0.000000       0.153031       0.090000   -9999.000000   -9999.000000       0.081000
52679     52679     gansu          102.8833       37.8833           88       132     2012      02        16        047              0.014913      -3.355133       0.000000       0.148661       0.086000   -9999.000000       0.057900       0.002000
52679     52679     gansu          102.8833       37.8833           88       132     2012      02        17        048              0.014708      -4.996613       0.000000       0.142170       0.084000   -9999.000000       0.063600       0.108000
52679     52679     gansu          102.8833       37.8833           88       132     2012      02        18        049              0.014667      -5.702454       0.000000       0.138194       0.079000   -9999.000000   -9999.000000       0.128000
52679     52679     gansu          102.8833       37.8833           88       132     2012      02        19        050              0.015125      -4.546051       1.583376       0.142272   -9999.000000   -9999.000000       0.057700   -9999.000000
52679     52679     gansu          102.8833       37.8833           88       132     2012      02        20        051              0.015708      -1.157349       2.888226       0.154681   -9999.000000   -9999.000000       0.055300       0.105000
52679     52679     gansu          102.8833       37.8833           88       132     2012      02        21        052              0.020167       0.264984       0.178633       0.159403       0.081000   -9999.000000   -9999.000000       0.129000
52679     52679     gansu          102.8833       37.8833           88       132     2012      02        22        053              0.021292       3.788025       0.000000       0.169426       0.080000   -9999.000000       0.063100       0.080000
52679     52679     gansu          102.8833       37.8833           88       132     2012      02        23        054              0.018375       2.059814       0.000000       0.166438   -9999.000000   -9999.000000       0.067700       0.041000
52679     52679     gansu          102.8833       37.8833           88       132     2012      02        24        055              0.017208      -1.302582       0.000000       0.155686   -9999.000000   -9999.000000       0.061800   -9999.000000
52679     52679     gansu          102.8833       37.8833           88       132     2012      02        25        056              0.016083      -2.485565       0.000000       0.149533   -9999.000000   -9999.000000       0.063500       0.031000
52679     52679     gansu          102.8833       37.8833           88       132     2012      02        26        057              0.016292      -4.590912       0.000000       0.138214       0.091000       0.197400   -9999.000000       0.116000
52679     52679     gansu          102.8833       37.8833           88       132     2012      02        27        058              0.017083      -1.147919       0.000000       0.153979       0.083000   -9999.000000       0.062100       0.147000
52679     52679     gansu          102.8833       37.8833           88       132     2012      02        28        059              0.018957       0.784882       0.929801       0.158889       0.082000   -9999.000000   -9999.000000       0.005000
52679     52679     gansu          102.8833       37.8833           88       132     2012      02        29        060              0.000000   -9999.000000       0.000000   -9999.000000       0.090000   -9999.000000   -9999.000000   -9999.000000
52679     52679     gansu          102.8833       37.8833           88       132     2012      03        01        061              0.024333       2.506104       0.000000       0.162623   -9999.000000       0.250300       0.066800       0.061000
52679     52679     gansu          102.8833       37.8833           88       132     2012      03        02        062              0.022136       3.768341       0.000000       0.163851       0.093000   -9999.000000       0.059900       0.219000
52679     52679     gansu          102.8833       37.8833           88       132     2012      03        03        063              0.023917       1.015045       0.861799       0.158636       0.090000   -9999.000000   -9999.000000       0.020000
52679     52679     gansu          102.8833       37.8833           88       132     2012      03        04        064              0.021958       3.277527       0.000000       0.163838   -9999.000000   -9999.000000       0.051400       0.206000
52679     52679     gansu          102.8833       37.8833           88       132     2012      03        05        065              0.018696      -0.254639       0.000000       0.157919   -9999.000000   -9999.000000       0.070500   -9999.000000
52679     52679     gansu          102.8833       37.8833           88       132     2012      03        06        066              0.018522      -0.184784       0.000000       0.155145   -9999.000000   -9999.000000       0.056600       0.145000
52679     52679     gansu          102.8833       37.8833           88       132     2012      03        07        067              0.000000       1.204651       0.000000       0.157376   -9999.000000   -9999.000000       0.070300       0.052000
52679     52679     gansu          102.8833       37.8833           88       132     2012      03        08        068              0.021913       1.534088       0.000000       0.158953       0.095000   -9999.000000       0.070100       0.041000
52679     52679     gansu          102.8833       37.8833           88       132     2012      03        09        069              0.022091       1.670654       0.000000       0.159496       0.087000   -9999.000000   -9999.000000       0.139000
52679     52679     gansu          102.8833       37.8833           88       132     2012      03        10        070              0.023875       3.189758       0.000000       0.158789       0.085000   -9999.000000       0.058400   -9999.000000
52679     52679     gansu          102.8833       37.8833           88       132     2012      03        11        071              0.023958       3.159912       0.000000       0.156348   -9999.000000   -9999.000000       0.065300       0.182000
52679     52679     gansu          102.8833       37.8833           88       132     2012      03        12        072              0.025167       0.907471       1.050823       0.152595   -9999.000000   -9999.000000       0.065100       0.217000
52679     52679     gansu          102.8833       37.8833           88       132     2012      03        13        073              0.027208       3.893402       0.000000       0.155001       0.085000   -9999.000000       0.059600       0.035000
52679     52679     gansu          102.8833       37.8833           88       132     2012      03        14        074              0.029208       5.966705       0.000000       0.155426       0.083000   -9999.000000   -9999.000000       0.131000
52679     52679     gansu          102.8833       37.8833           88       132     2012      03        15        075              0.029957       7.952606       0.000000       0.155125       0.077000   -9999.000000       0.065000       0.110000
52679     52679     gansu          102.8833       37.8833           88       132     2012      03        16        076              0.029091       7.001556       0.000000       0.151977       0.086000   -9999.000000       0.057300       0.036000
52679     52679     gansu          102.8833       37.8833           88       132     2012      03        17        077              0.028333       9.059235       0.000000       0.150947       0.084000   -9999.000000       0.070400       0.120000
52679     52679     gansu          102.8833       37.8833           88       132     2012      03        18        078              0.027364       8.259583       0.000000       0.149812       0.086000   -9999.000000       0.061600       0.086000
52679     52679     gansu          102.8833       37.8833           88       132     2012      03        19        079              0.026958       3.800995       0.000000       0.148734       0.083000   -9999.000000       0.060700   -9999.000000
52679     52679     gansu          102.8833       37.8833           88       132     2012      03        20        080              0.026304       7.458923       0.000000       0.150245       0.080000   -9999.000000   -9999.000000       0.004000
52679     52679     gansu          102.8833       37.8833           88       132     2012      03        21        081              0.025391       9.103424       0.000000       0.149684       0.080000       0.132100       0.068000       0.055000
52679     52679     gansu          102.8833       37.8833           88       132     2012      03        22        082              0.024667       4.143555       0.000000       0.148480   -9999.000000   -9999.000000       0.067800       0.092000
52679     52679     gansu          102.8833       37.8833           88       132     2012      03        23        083              0.024375       3.899506       0.000000       0.146966       0.095000   -9999.000000       0.052300       0.032000
52679     52679     gansu          102.8833       37.8833           88       132     2012      03        24        084              0.024167       5.449493       0.000000       0.145528       0.087000   -9999.000000       0.067300   -9999.000000
52679     52679     gansu          102.8833       37.8833           88       132     2012      03        25        085              0.000000       8.177979       0.029748       0.146511       0.083000       0.081600       0.059500       0.143000
52679     52679     gansu          102.8833       37.8833           88       132     2012      03        26        086              0.022792       9.524414       0.212335       0.146302       0.081000   -9999.000000       0.064200   -9999.000000
52679     52679     gansu          102.8833       37.8833           88       132     2012      03        27        087              0.022125      10.896790       0.000000       0.145570       0.086000   -9999.000000       0.064600       0.150000
52679     52679     gansu          102.8833       37.8833           88       132     2012      03        28        088              0.021167      12.027863       0.000000       0.144962       0.084000       0.093400       0.074200       0.016000
52679     52679     gansu          102.8833       37.8833           88       132     2012      03        29        089              0.020250      12.338623       0.000000       0.144453       0.083500   -9999.000000       0.064600   -9999.000000
52679     52679     gansu          102.8833       37.8833           88       132     2012      03        30        090              0.019500      10.881927       0.501014       0.144521       0.083000   -9999.000000       0.059500       0.132000
52679     52679     gansu          102.8833       37.8833           88       132     2012      03        31        091              0.031042       8.102081       0.000000       0.146948       0.079000   -9999.000000   -9999.000000       0.174000
52679     52679     gansu          102.8833       37.8833           88       132     2012      04        01        092              0.038583      12.574982       0.000000       0.148896       0.095000   -9999.000000       0.068900       0.095000
52679     52679     gansu          102.8833       37.8833           88       132     2012      04        02        093              0.038000      12.712402       0.053087       0.145565       0.090000   -9999.000000       0.052800       0.163000
52679     52679     gansu          102.8833       37.8833           88       132     2012      04        03        094              0.037542      10.812286       0.000000       0.145683       0.085000       0.184300       0.069400   -9999.000000
52679     52679     gansu          102.8833       37.8833           88       132     2012      04        04        095              0.037250      12.444794       0.000000       0.144362       0.081500   -9999.000000       0.063800       0.016000
52679     52679     gansu          102.8833       37.8833           88       132     2012      04        05        096              0.036458      14.075867       0.000000       0.143201       0.079000   -9999.000000       0.058200       0.115000
52679     52679     gansu          102.8833       37.8833           88       132     2012      04        06        097              0.036000      12.485352       0.000000       0.142998       0.083000   -9999.000000   -9999.000000       0.064000
52679     52679     gansu          102.8833       37.8833           88       132     2012      04        07        098              0.035583      12.241943       0.000000       0.143587       0.084000   -9999.000000       0.064800       0.084000
52679     52679     gansu          102.8833       37.8833           88       132     2012      04        08        099              0.035500      13.909271       0.000000       0.142645       0.086000   -9999.000000       0.074300   -9999.000000
52679     52679     gansu          102.8833       37.8833           88       132     2012      04        09        100              0.034958      15.380493       0.000000       0.141777       0.079000   -9999.000000       0.064100       0.116000
52679     52679     gansu          102.8833       37.8833           88       132     2012      04        10        101              0.034542      15.003906       0.000000       0.141420       0.082000   -9999.000000       0.060800   -9999.000000
52679     52679     gansu          102.8833       37.8833           88       132     2012      04        11        102              0.034708      14.603760       3.857375       0.141442   -9999.000000       0.023600       0.126100       0.250000
52679     52679     gansu          102.8833       37.8833           88       132     2012      04        12        103              0.035917       4.361420       0.367257       0.192007   -9999.000000   -9999.000000       0.076900   -9999.000000
52679     52679     gansu          102.8833       37.8833           88       132     2012      04        13        104              0.036583      10.224335       0.000000       0.197639       0.084000   -9999.000000       0.066200       0.120000
52679     52679     gansu          102.8833       37.8833           88       132     2012      04        14        105              0.037208      12.398010       0.070944       0.180403       0.080500       0.141900       0.067900       0.123000
52679     52679     gansu          102.8833       37.8833           88       132     2012      04        15        106              0.036583      15.384979       0.000000       0.166709       0.080000   -9999.000000       0.061600       0.156000
52679     52679     gansu          102.8833       37.8833           88       132     2012      04        16        107              0.036208      14.725647       0.133601       0.157234       0.077000       0.011100       0.063300       0.171000
52679     52679     gansu          102.8833       37.8833           88       132     2012      04        17        108              0.035500      16.274200       0.000000       0.151878       0.084000   -9999.000000   -9999.000000   -9999.000000
52679     52679     gansu          102.8833       37.8833           88       132     2012      04        18        109              0.035083      16.255859       0.381674       0.148635       0.083000   -9999.000000   -9999.000000       0.100000
52679     52679     gansu          102.8833       37.8833           88       132     2012      04        19        110              0.034375      17.994781       0.219419       0.146039       0.083000   -9999.000000       0.067000       0.190000
52679     52679     gansu          102.8833       37.8833           88       132     2012      04        20        111              0.034083      16.388611       0.193158       0.145058       0.075000       0.050100       0.074200       0.105000
52679     52679     gansu          102.8833       37.8833           88       132     2012      04        21        112              0.033583      17.450073       0.000000       0.143644       0.080000       0.239000       0.071500       0.047000
52679     52679     gansu          102.8833       37.8833           88       132     2012      04        22        113              0.033333      20.141083       0.000000       0.141805       0.088000   -9999.000000   -9999.000000   -9999.000000
52679     52679     gansu          102.8833       37.8833           88       132     2012      04        23        114              0.032625      22.276093       0.285107       0.140473       0.086000   -9999.000000   -9999.000000       0.098000
52679     52679     gansu          102.8833       37.8833           88       132     2012      04        24        115              0.032375      14.430145       1.082422       0.143863       0.082000   -9999.000000       0.067800       0.073000
52679     52679     gansu          102.8833       37.8833           88       132     2012      04        25        116              0.000000      10.044983       0.000000       0.156050       0.084500   -9999.000000       0.074400       0.076000
52679     52679     gansu          102.8833       37.8833           88       132     2012      04        26        117              0.032417      15.236969       0.000000       0.151652       0.081000       0.134600       0.069600       0.036000
52679     52679     gansu          102.8833       37.8833           88       132     2012      04        27        118              0.032333      17.700958       0.000000       0.143887       0.090000   -9999.000000       0.060000   -9999.000000
52679     52679     gansu          102.8833       37.8833           88       132     2012      04        28        119              0.031875      20.278198       1.262500       0.140605       0.087000   -9999.000000       0.061500       0.133000
52679     52679     gansu          102.8833       37.8833           88       132     2012      04        29        120              0.031783      21.554749       2.424804       0.139566       0.089500       0.056400       0.072000       0.111000
52679     52679     gansu          102.8833       37.8833           88       132     2012      04        30        121              0.031333      23.261505       0.329464       0.149867       0.088500   -9999.000000       0.059700       0.122000
52679     52679     gansu          102.8833       37.8833           88       132     2012      05        01        122              0.031458      17.709961       0.000000       0.167889       0.100000   -9999.000000       0.076300       0.029000
52679     52679     gansu          102.8833       37.8833           88       132     2012      05        02        123              0.031375      21.199707       0.000000       0.150868       0.082000   -9999.000000       0.062900   -9999.000000
52679     52679     gansu          102.8833       37.8833           88       132     2012      05        03        124              0.032917      21.427612      10.282461       0.143809       0.219000   -9999.000000       0.130700       0.542000
52679     52679     gansu          102.8833       37.8833           88       132     2012      05        04        125              0.045250      15.966766       0.099945       0.235633       0.144000       0.401500   -9999.000000       0.293000
52679     52679     gansu          102.8833       37.8833           88       132     2012      05        05        126              0.060958      19.109985       0.463055       0.228587       0.119000   -9999.000000       0.087400       0.083000
52679     52679     gansu          102.8833       37.8833           88       132     2012      05        06        127              0.061875      21.176208       0.090890       0.208247       0.110000   -9999.000000       0.075900       0.070000
52679     52679     gansu          102.8833       37.8833           88       132     2012      05        07        128              0.059792      19.899323       0.490530       0.195963   -9999.000000       0.267900       0.059900   -9999.000000
52679     52679     gansu          102.8833       37.8833           88       132     2012      05        08        129              0.058083      20.961060       1.620918       0.179589   -9999.000000   -9999.000000       0.073100       0.155000
52679     52679     gansu          102.8833       37.8833           88       132     2012      05        09        130              0.054750      23.354401       2.984562       0.164190   -9999.000000   -9999.000000       0.066600       0.177000
52679     52679     gansu          102.8833       37.8833           88       132     2012      05        10        131              0.050042      24.792267       1.412962       0.178600       0.123000   -9999.000000   -9999.000000       0.076000
52679     52679     gansu          102.8833       37.8833           88       132     2012      05        11        132              0.048458      16.511353       1.071511       0.208573       0.150000   -9999.000000       0.083500       0.147000
52679     52679     gansu          102.8833       37.8833           88       132     2012      05        12        133              0.049042      12.011108       0.000000       0.209376       0.133000   -9999.000000       0.076600       0.060000
52679     52679     gansu          102.8833       37.8833           88       132     2012      05        13        134              0.047125      17.696136       0.000000       0.188760       0.135000       0.149600       0.074200       0.137000
52679     52679     gansu          102.8833       37.8833           88       132     2012      05        14        135              0.045667      16.793732       0.000000       0.171665       0.133000       0.105200       0.061500       0.206000
52679     52679     gansu          102.8833       37.8833           88       132     2012      05        15        136              0.043333      18.724304       0.000000       0.159474       0.128000   -9999.000000       0.064500       0.065000
52679     52679     gansu          102.8833       37.8833           88       132     2012      05        16        137              0.040750      20.905609       0.000000       0.151924       0.126500   -9999.000000       0.070300   -9999.000000
52679     52679     gansu          102.8833       37.8833           88       132     2012      05        17        138              0.037750      22.349579       0.000000       0.147778       0.115000       0.043500       0.063100       0.142000
52679     52679     gansu          102.8833       37.8833           88       132     2012      05        18        139              0.035042      22.942230       0.000000       0.145811       0.139500       0.124400       0.078800       0.029000
52679     52679     gansu          102.8833       37.8833           88       132     2012      05        19        140              0.033333      24.129913       0.000000       0.144624       0.126000   -9999.000000       0.063100       0.055000
52679     52679     gansu          102.8833       37.8833           88       132     2012      05        20        141              0.032417      25.331146       0.362867       0.143729       0.122000   -9999.000000       0.061600       0.105000
52679     52679     gansu          102.8833       37.8833           88       132     2012      05        21        142              0.032000      23.426880       1.047392       0.146894       0.171000   -9999.000000   -9999.000000   -9999.000000
52679     52679     gansu          102.8833       37.8833           88       132     2012      05        22        143              0.032375      16.039154       0.000000       0.159820       0.158000       0.052200       0.066600       0.184000
52679     52679     gansu          102.8833       37.8833           88       132     2012      05        23        144              0.032000      19.458801       2.746419       0.154705   -9999.000000   -9999.000000       0.077100       0.041000
52679     52679     gansu          102.8833       37.8833           88       132     2012      05        24        145              0.032458      15.344666       1.535565       0.183707       0.162000   -9999.000000       0.057700       0.128000
52679     52679     gansu          102.8833       37.8833           88       132     2012      05        25        146              0.000000      20.348175       0.515949       0.170736       0.151000   -9999.000000       0.064800       0.020000
52679     52679     gansu          102.8833       37.8833           88       132     2012      05        26        147              0.031542      22.241974       0.000000       0.153904       0.149500   -9999.000000       0.061800   -9999.000000
52679     52679     gansu          102.8833       37.8833           88       132     2012      05        27        148              0.031375      24.522644       0.079880       0.146261       0.141000   -9999.000000   -9999.000000       0.179000
52679     52679     gansu          102.8833       37.8833           88       132     2012      05        28        149              0.030833      27.467194       2.177043       0.143023       0.168000   -9999.000000   -9999.000000       0.107000
52679     52679     gansu          102.8833       37.8833           88       132     2012      05        29        150              0.030667      18.058136       0.000000       0.171949       0.160000   -9999.000000       0.072200       0.181000
52679     52679     gansu          102.8833       37.8833           88       132     2012      05        30        151              0.030708      22.033997       0.000000       0.156971       0.143000       0.252800       0.068400   -9999.000000
52679     52679     gansu          102.8833       37.8833           88       132     2012      05        31        152              0.030458      24.697693       0.208567       0.145987       0.136000       0.133200       0.062200   -9999.000000
52679     52679     gansu          102.8833       37.8833           88       132     2012      06        01        153              0.030583      22.029327       0.000000       0.143182       0.142500       0.154100   -9999.000000       0.162000
52679     52679     gansu          102.8833       37.8833           88       132     2012      06        02        154              0.030542      25.622406       0.000000       0.141046       0.147000   -9999.000000       0.058300       0.174000
52679     52679     gansu          102.8833       37.8833           88       132     2012      06        03        155              0.030417      26.117004       0.000000       0.139787       0.153000   -9999.000000   -9999.000000       0.202000
52679     52679     gansu          102.8833       37.8833           88       132     2012      06        04        156              0.030458      25.683350       0.000000       0.139163       0.171000   -9999.000000       0.068300       0.083000
52679     52679     gansu          102.8833       37.8833           88       132     2012      06        05        157              0.030000      27.554169       0.661879       0.138705       0.183500   -9999.000000       0.062900   -9999.000000
52679     52679     gansu          102.8833       37.8833           88       132     2012      06        06        158              0.030667      21.633667       3.339463       0.146026       0.214500       0.029500       0.059300       0.143000
52679     52679     gansu          102.8833       37.8833           88       132     2012      06        07        159              0.030833      22.156372       0.000000       0.170696       0.157000   -9999.000000   -9999.000000   -9999.000000
52679     52679     gansu          102.8833       37.8833           88       132     2012      06        08        160              0.030625      23.133911       0.000000       0.177463       0.144000   -9999.000000       0.064100       0.197000
52679     52679     gansu          102.8833       37.8833           88       132     2012      06        09        161              0.030542      24.879517       0.000000       0.155598       0.152000       0.046700       0.064200       0.244000
52679     52679     gansu          102.8833       37.8833           88       132     2012      06        10        162              0.030417      27.569275       0.000000       0.145002       0.161000       0.074000       0.056300       0.183000
52679     52679     gansu          102.8833       37.8833           88       132     2012      06        11        163              0.000000      26.080292       0.000000       0.141784       0.146500   -9999.000000       0.060000       0.294000
52679     52679     gansu          102.8833       37.8833           88       132     2012      06        12        164              0.030292      26.701599       0.000000       0.139664       0.151000   -9999.000000       0.055500       0.223000
52679     52679     gansu          102.8833       37.8833           88       132     2012      06        13        165              0.030292      26.900238       0.000000       0.138349       0.137000   -9999.000000   -9999.000000       0.164000
52679     52679     gansu          102.8833       37.8833           88       132     2012      06        14        166              0.030000      26.928345       0.000000       0.137670       0.148000   -9999.000000       0.057700   -9999.000000
52679     52679     gansu          102.8833       37.8833           88       132     2012      06        15        167              0.030208      24.797394       0.000000       0.137662       0.161000   -9999.000000       0.057900       0.015000
52679     52679     gansu          102.8833       37.8833           88       132     2012      06        16        168              0.030250      27.002502       0.000000       0.136877       0.145000   -9999.000000       0.062200       0.116000
52679     52679     gansu          102.8833       37.8833           88       132     2012      06        17        169              0.030000      28.479370       0.121072       0.136231       0.151000       0.310600       0.055300       0.318000
52679     52679     gansu          102.8833       37.8833           88       132     2012      06        18        170              0.030292      24.347748       0.000000       0.138625       0.131000   -9999.000000   -9999.000000       0.204000
52679     52679     gansu          102.8833       37.8833           88       132     2012      06        19        171              0.030250      28.418732       0.000000       0.136665       0.157000       0.169800       0.056200   -9999.000000
52679     52679     gansu          102.8833       37.8833           88       132     2012      06        20        172              0.030208      29.181641       0.000000       0.135278       0.143000   -9999.000000       0.051600       0.044000
52679     52679     gansu          102.8833       37.8833           88       132     2012      06        21        173              0.030208      29.571625       0.000000       0.134897       0.149500   -9999.000000       0.061300       0.184000
52679     52679     gansu          102.8833       37.8833           88       132     2012      06        22        174              0.030208      29.872772       0.676015       0.134407       0.146500       0.092600       0.053500       0.052000
52679     52679     gansu          102.8833       37.8833           88       132     2012      06        23        175              0.030000      30.884460       1.990774       0.134263   -9999.000000   -9999.000000       0.054800       0.472000
52679     52679     gansu          102.8833       37.8833           88       132     2012      06        24        176              0.030250      21.463959       0.000000       0.158808       0.139000       0.070000   -9999.000000   -9999.000000
52679     52679     gansu          102.8833       37.8833           88       132     2012      06        25        177              0.030167      27.205811       0.074868       0.145091       0.163000   -9999.000000       0.057900       0.033000
52679     52679     gansu          102.8833       37.8833           88       132     2012      06        26        178              0.030042      29.060669       6.809882       0.137686       0.190500   -9999.000000       0.138100       0.286000
52679     52679     gansu          102.8833       37.8833           88       132     2012      06        27        179              0.102417      25.521118       9.978207       0.159494       0.290000       0.436800       0.107900       0.462000
52679     52679     gansu          102.8833       37.8833           88       132     2012      06        28        180              0.139667      20.574463      10.287814       0.280198       0.187000       0.096700       0.086300       0.599000
52679     52679     gansu          102.8833       37.8833           88       132     2012      06        29        181              0.132750      21.047272       0.000000       0.293288       0.143000   -9999.000000       0.060500   -9999.000000
52679     52679     gansu          102.8833       37.8833           88       132     2012      06        30        182              0.118292      24.649323       0.000000       0.249347       0.169000       0.180800       0.064500   -9999.000000
52679     52679     gansu          102.8833       37.8833           88       132     2012      07        01        183              0.112708      27.282806       0.368416       0.219765       0.152500   -9999.000000       0.060800       0.188000
52679     52679     gansu          102.8833       37.8833           88       132     2012      07        02        184              0.114208      25.416168       0.000000       0.205752       0.145000   -9999.000000       0.060200       0.022000
52679     52679     gansu          102.8833       37.8833           88       132     2012      07        03        185              0.107000      26.006256       0.000000       0.192998       0.114000   -9999.000000       0.057200       0.022000
52679     52679     gansu          102.8833       37.8833           88       132     2012      07        04        186              0.098500      26.693085       0.000000       0.177433       0.118000   -9999.000000       0.052200   -9999.000000
52679     52679     gansu          102.8833       37.8833           88       132     2012      07        05        187              0.090875      27.027649       0.000000       0.166321   -9999.000000   -9999.000000   -9999.000000       0.239000
52679     52679     gansu          102.8833       37.8833           88       132     2012      07        06        188              0.078708      29.892883       0.277603       0.158517       0.153000       0.122600       0.057000   -9999.000000
52679     52679     gansu          102.8833       37.8833           88       132     2012      07        07        189              0.074375      21.636810       0.882610       0.162260   -9999.000000   -9999.000000       0.052400       0.393000
52679     52679     gansu          102.8833       37.8833           88       132     2012      07        08        190              0.070042      26.435425       0.519626       0.161972       0.130000   -9999.000000       0.053500   -9999.000000
52679     52679     gansu          102.8833       37.8833           88       132     2012      07        09        191              0.063375      28.408813       0.000000       0.162248       0.113000   -9999.000000       0.055100       0.322000
52679     52679     gansu          102.8833       37.8833           88       132     2012      07        10        192              0.057875      27.966034       0.000000       0.155825       0.137000       0.136000       0.048300       0.214000
52679     52679     gansu          102.8833       37.8833           88       132     2012      07        11        193              0.052125      30.418884       1.305689       0.150059       0.121000   -9999.000000   -9999.000000       0.149000
52679     52679     gansu          102.8833       37.8833           88       132     2012      07        12        194              0.048625      26.895355       0.473839       0.148963       0.112500   -9999.000000       0.054600       0.372000
52679     52679     gansu          102.8833       37.8833           88       132     2012      07        13        195              0.045458      27.423553       0.000000       0.151860       0.119000   -9999.000000       0.060400   -9999.000000
52679     52679     gansu          102.8833       37.8833           88       132     2012      07        14        196              0.042125      28.048248       0.000000       0.148648       0.119000   -9999.000000       0.055000       0.250000
52679     52679     gansu          102.8833       37.8833           88       132     2012      07        15        197              0.038500      29.837341       0.000000       0.145802       0.095000       0.071200       0.051600       0.339000
52679     52679     gansu          102.8833       37.8833           88       132     2012      07        16        198              0.035750      29.856598       0.894546       0.144950       0.144000   -9999.000000       0.050800   -9999.000000
52679     52679     gansu          102.8833       37.8833           88       132     2012      07        17        199              0.034417      29.789459       1.178225       0.150433       0.125000   -9999.000000       0.057200       0.330000
52679     52679     gansu          102.8833       37.8833           88       132     2012      07        18        200              0.033667      27.220154       4.755044       0.154941       0.121500   -9999.000000       0.056000   -9999.000000
52679     52679     gansu          102.8833       37.8833           88       132     2012      07        19        201              0.033375      23.852112       0.000000       0.214998       0.115000   -9999.000000       0.058700       0.250000
52679     52679     gansu          102.8833       37.8833           88       132     2012      07        20        202              0.122167      28.204010      10.198160       0.183365       0.106000   -9999.000000       0.076700       0.775000
52679     52679     gansu          102.8833       37.8833           88       132     2012      07        21        203              0.196545      25.177460       1.276537       0.230820       0.158000   -9999.000000       0.067900       0.454000
52679     52679     gansu          102.8833       37.8833           88       132     2012      07        22        204              0.177333      23.444946       1.055602       0.252392       0.119000   -9999.000000   -9999.000000       0.391000
52679     52679     gansu          102.8833       37.8833           88       132     2012      07        23        205              0.159542      26.516907       0.033857       0.218553       0.118500   -9999.000000       0.053700   -9999.000000
52679     52679     gansu          102.8833       37.8833           88       132     2012      07        24        206              0.153083      26.909546       3.638959       0.199764       0.157000       0.267100       0.075600       0.268000
52679     52679     gansu          102.8833       37.8833           88       132     2012      07        25        207              0.190125      22.761139       1.335764       0.220649       0.108000   -9999.000000       0.046400       0.535000
52679     52679     gansu          102.8833       37.8833           88       132     2012      07        26        208              0.215250      26.982422       0.081199       0.212006       0.125500   -9999.000000       0.056500       0.287000
52679     52679     gansu          102.8833       37.8833           88       132     2012      07        27        209              0.191500      28.257690       0.206008       0.196305       0.146000   -9999.000000       0.049700       0.079000
52679     52679     gansu          102.8833       37.8833           88       132     2012      07        28        210              0.172958      29.307068       0.687623       0.179610       0.125000       0.283200   -9999.000000   -9999.000000
52679     52679     gansu          102.8833       37.8833           88       132     2012      07        29        211              0.169167      30.045105      18.145029       0.172125       0.162500   -9999.000000       0.097400       0.800000
52679     52679     gansu          102.8833       37.8833           88       132     2012      07        30        212              0.179250      27.038269       0.839448       0.277664       0.157000   -9999.000000       0.090100       0.370000
52679     52679     gansu          102.8833       37.8833           88       132     2012      07        31        213              0.169750      23.482880       0.000000       0.271739       0.116000   -9999.000000       0.059300       0.507000
52679     52679     gansu          102.8833       37.8833           88       132     2012      08        01        214              0.160333      24.772095       0.000000       0.239292       0.120000   -9999.000000       0.051100       0.344000
52679     52679     gansu          102.8833       37.8833           88       132     2012      08        02        215              0.148917      27.012695       0.000000       0.213320       0.118000       0.057200   -9999.000000   -9999.000000
52679     52679     gansu          102.8833       37.8833           88       132     2012      08        03        216              0.137875      28.415405       0.000000       0.192079       0.108000   -9999.000000       0.059300       0.288000
52679     52679     gansu          102.8833       37.8833           88       132     2012      08        04        217              0.128417      29.782898       0.191762       0.176513       0.100500   -9999.000000       0.046400   -9999.000000
52679     52679     gansu          102.8833       37.8833           88       132     2012      08        05        218              0.120250      30.958893      12.541908       0.167759       0.093000   -9999.000000       0.071900       0.651000
52679     52679     gansu          102.8833       37.8833           88       132     2012      08        06        219              0.112708      28.557220       0.605888       0.240282       0.111000   -9999.000000       0.054200   -9999.000000
52679     52679     gansu          102.8833       37.8833           88       132     2012      08        07        220              0.108083      22.828888       0.000000       0.246185       0.110000       0.018700       0.049400       0.396000
52679     52679     gansu          102.8833       37.8833           88       132     2012      08        08        221              0.103583      22.397156       0.685692       0.227201       0.108500   -9999.000000   -9999.000000       0.124000
52679     52679     gansu          102.8833       37.8833           88       132     2012      08        09        222              0.099167      22.332977       0.000000       0.219361       0.107000   -9999.000000       0.053100       0.294000
52679     52679     gansu          102.8833       37.8833           88       132     2012      08        10        223              0.092542      27.258759       0.055723       0.199751       0.096000       0.165900   -9999.000000       0.502000
52679     52679     gansu          102.8833       37.8833           88       132     2012      08        11        224              0.086958      26.215149       0.378739       0.186133       0.103000   -9999.000000       0.044900   -9999.000000
52679     52679     gansu          102.8833       37.8833           88       132     2012      08        12        225              0.082375      27.010284       1.198323       0.177077       0.121000   -9999.000000       0.051300       0.262000
52679     52679     gansu          102.8833       37.8833           88       132     2012      08        13        226              0.079083      23.961121       0.000000       0.188016       0.114000   -9999.000000       0.045900       0.442000
52679     52679     gansu          102.8833       37.8833           88       132     2012      08        14        227              0.074500      25.222290       0.000000       0.177382       0.111500   -9999.000000   -9999.000000       0.390000
52679     52679     gansu          102.8833       37.8833           88       132     2012      08        15        228              0.067458      26.167358       0.257570       0.165215       0.099000       0.223200       0.059700       0.504000
52679     52679     gansu          102.8833       37.8833           88       132     2012      08        16        229              0.062333      28.259064       5.830526       0.158037       0.138000   -9999.000000       0.080100   -9999.000000
52679     52679     gansu          102.8833       37.8833           88       132     2012      08        17        230              0.058708      20.887787       1.832370       0.229504       0.209000   -9999.000000       0.049900       0.253000
52679     52679     gansu          102.8833       37.8833           88       132     2012      08        18        231              0.053750      22.107910       0.032089       0.223044       0.120000   -9999.000000       0.051100       0.539000
52679     52679     gansu          102.8833       37.8833           88       132     2012      08        19        232              0.048500      23.411621       0.000000       0.210001       0.112500   -9999.000000   -9999.000000       0.228000
52679     52679     gansu          102.8833       37.8833           88       132     2012      08        20        233              0.042833      25.479034       0.000000       0.183927       0.105500       0.068800       0.054300       0.405000
52679     52679     gansu          102.8833       37.8833           88       132     2012      08        21        234              0.039792      23.756897       0.000000       0.168431       0.108000       0.065400       0.045200   -9999.000000
52679     52679     gansu          102.8833       37.8833           88       132     2012      08        22        235              0.037500      24.255737       0.000000       0.160018       0.100000   -9999.000000       0.061300   -9999.000000
52679     52679     gansu          102.8833       37.8833           88       132     2012      08        23        236              0.035750      24.967072       0.000000       0.155509       0.116000   -9999.000000       0.052800       0.420000
52679     52679     gansu          102.8833       37.8833           88       132     2012      08        24        237              0.034250      26.516937       0.000000       0.152041       0.116000   -9999.000000       0.046700   -9999.000000
52679     52679     gansu          102.8833       37.8833           88       132     2012      08        25        238              0.000000      25.929169       0.000000       0.150662       0.109500   -9999.000000   -9999.000000   -9999.000000
52679     52679     gansu          102.8833       37.8833           88       132     2012      08        26        239              0.032417      26.221100       0.000000       0.149177       0.097000   -9999.000000       0.053100   -9999.000000
52679     52679     gansu          102.8833       37.8833           88       132     2012      08        27        240              0.032000      26.429260       0.000000       0.148348       0.101000   -9999.000000       0.054600       0.252000
52679     52679     gansu          102.8833       37.8833           88       132     2012      08        28        241              0.031542      26.929047       0.000000       0.146832       0.108000       0.166600       0.051400       0.420000
52679     52679     gansu          102.8833       37.8833           88       132     2012      08        29        242              0.031417      27.476471       0.589425       0.145626       0.105000       0.133500       0.047800       0.183000
52679     52679     gansu          102.8833       37.8833           88       132     2012      08        30        243              0.031000      29.101746       0.183468       0.146053       0.111500   -9999.000000       0.049000       0.404000
52679     52679     gansu          102.8833       37.8833           88       132     2012      08        31        244              0.033958      24.529877      12.621263       0.151948       0.174000   -9999.000000   -9999.000000   -9999.000000
52679     52679     gansu          102.8833       37.8833           88       132     2012      09        01        245              0.084458      21.334503       2.673661       0.212853       0.187000   -9999.000000       0.094600       0.574000
52679     52679     gansu          102.8833       37.8833           88       132     2012      09        02        246              0.091917      15.811920       0.293362       0.272807       0.156000   -9999.000000       0.078500   -9999.000000
52679     52679     gansu          102.8833       37.8833           88       132     2012      09        03        247              0.083458      19.196442       0.000000       0.237329       0.132000   -9999.000000       0.053500       0.399000
52679     52679     gansu          102.8833       37.8833           88       132     2012      09        04        248              0.073304      19.598694       0.000000       0.216898       0.124000       0.134500       0.051000       0.056000
52679     52679     gansu          102.8833       37.8833           88       132     2012      09        05        249              0.062875      20.383484       0.000000       0.201802       0.113500   -9999.000000   -9999.000000       0.219000
52679     52679     gansu          102.8833       37.8833           88       132     2012      09        06        250              0.053875      21.260986       0.000000       0.189357       0.105000   -9999.000000       0.054200       0.167000
52679     52679     gansu          102.8833       37.8833           88       132     2012      09        07        251              0.044958      23.838043       1.144536       0.176354       0.108000       0.094400       0.048500       0.419000
52679     52679     gansu          102.8833       37.8833           88       132     2012      09        08        252              0.040625      21.014069       0.000000       0.185313       0.119000       0.081500       0.061900       0.293000
52679     52679     gansu          102.8833       37.8833           88       132     2012      09        09        253              0.036917      24.153351       1.818958       0.172167       0.168000   -9999.000000       0.054100   -9999.000000
52679     52679     gansu          102.8833       37.8833           88       132     2012      09        10        254              0.097250      23.488678       7.344171       0.173311       0.169000   -9999.000000       0.070700       0.252000
52679     52679     gansu          102.8833       37.8833           88       132     2012      09        11        255              0.144958      21.283783       0.115786       0.239264       0.141000   -9999.000000   -9999.000000       0.300000
52679     52679     gansu          102.8833       37.8833           88       132     2012      09        12        256              0.127792      16.873444       1.036618       0.232060       0.120000       0.049500       0.059500       0.415000
52679     52679     gansu          102.8833       37.8833           88       132     2012      09        13        257              0.113042      15.398560       0.000000       0.214162       0.127000   -9999.000000       0.059100       0.231000
52679     52679     gansu          102.8833       37.8833           88       132     2012      09        14        258              0.098708      16.011444       0.000000       0.200388       0.142000   -9999.000000       0.051500   -9999.000000
52679     52679     gansu          102.8833       37.8833           88       132     2012      09        15        259              0.084167      17.670441       0.000000       0.188009       0.121000       0.251100       0.050600       0.170000
52679     52679     gansu          102.8833       37.8833           88       132     2012      09        16        260              0.069750      19.609680       0.241532       0.177534       0.126500       0.088500       0.054200       0.304000
52679     52679     gansu          102.8833       37.8833           88       132     2012      09        17        261              0.055125      18.582123       4.850872       0.173726       0.107000   -9999.000000       0.060400       0.245000
52679     52679     gansu          102.8833       37.8833           88       132     2012      09        18        262              0.043542      19.529175       0.000000       0.167454       0.101000   -9999.000000       0.054100       0.239000
52679     52679     gansu          102.8833       37.8833           88       132     2012      09        19        263              0.038417      19.958405       3.777349       0.160485       0.117000   -9999.000000       0.103100   -9999.000000
52679     52679     gansu          102.8833       37.8833           88       132     2012      09        20        264              0.035875      21.620453       0.637438       0.175917       0.160000       0.341500       0.065000       0.428000
52679     52679     gansu          102.8833       37.8833           88       132     2012      09        21        265              0.035167      17.328400       0.000000       0.212555   -9999.000000       0.120000       0.052900       0.378000
52679     52679     gansu          102.8833       37.8833           88       132     2012      09        22        266              0.034083      19.263580       0.000000       0.190419       0.100000       0.163500   -9999.000000       0.233000
52679     52679     gansu          102.8833       37.8833           88       132     2012      09        23        267              0.034708      20.329224      11.915179       0.175607       0.101000   -9999.000000       0.113000       0.598000
52679     52679     gansu          102.8833       37.8833           88       132     2012      09        24        268              0.116500      18.510895       5.807559       0.222141       0.229000   -9999.000000       0.108800   -9999.000000
52679     52679     gansu          102.8833       37.8833           88       132     2012      09        25        269              0.161125      15.870148       0.115267       0.284179       0.145000       0.133700       0.049000       0.170000
52679     52679     gansu          102.8833       37.8833           88       132     2012      09        26        270              0.140958      17.238068       0.000000       0.259005       0.113500   -9999.000000       0.058400       0.456000
52679     52679     gansu          102.8833       37.8833           88       132     2012      09        27        271              0.127286      16.601562       0.000000       0.238572       0.109000   -9999.000000       0.057900       0.202000
52679     52679     gansu          102.8833       37.8833           88       132     2012      09        28        272              0.104667      14.030731       0.000000       0.224649       0.099000   -9999.000000   -9999.000000       0.214000
52679     52679     gansu          102.8833       37.8833           88       132     2012      09        29        273              0.097000      13.484100       0.000000       0.216076       0.123000   -9999.000000       0.065500   -9999.000000
52679     52679     gansu          102.8833       37.8833           88       132     2012      09        30        274              0.088625      14.221069       0.000000       0.208476       0.116000   -9999.000000       0.061800       0.044000
52679     52679     gansu          102.8833       37.8833           88       132     2012      10        01        275              0.080917      14.960785       0.000000       0.200590       0.108500       0.045000       0.053000       0.149000
52679     52679     gansu          102.8833       37.8833           88       132     2012      10        02        276              0.072458      16.170197       0.000000       0.192636       0.105000   -9999.000000       0.057800       0.300000
52679     52679     gansu          102.8833       37.8833           88       132     2012      10        03        277              0.065500      15.291168       0.111837       0.186957       0.105000   -9999.000000       0.059400   -9999.000000
52679     52679     gansu          102.8833       37.8833           88       132     2012      10        04        278              0.059042      14.830780       0.000000       0.182064       0.110000   -9999.000000       0.063400       0.210000
52679     52679     gansu          102.8833       37.8833           88       132     2012      10        05        279              0.053583      13.824219       0.000000       0.177932       0.108000   -9999.000000       0.052500       0.341000
52679     52679     gansu          102.8833       37.8833           88       132     2012      10        06        280              0.049125      13.770782       0.000000       0.173975       0.110000   -9999.000000       0.069400       0.275000
52679     52679     gansu          102.8833       37.8833           88       132     2012      10        07        281              0.046000      14.622559       0.052484       0.170967       0.105500   -9999.000000       0.060700       0.228000
52679     52679     gansu          102.8833       37.8833           88       132     2012      10        08        282              0.042333      16.839050       0.574055       0.167810       0.112000   -9999.000000       0.062000   -9999.000000
52679     52679     gansu          102.8833       37.8833           88       132     2012      10        09        283              0.040958      12.439484       0.000000       0.173836       0.105000       0.113200   -9999.000000       0.048000
52679     52679     gansu          102.8833       37.8833           88       132     2012      10        10        284              0.039583      12.754974       0.000000       0.170209       0.107000   -9999.000000       0.065000       0.125000
52679     52679     gansu          102.8833       37.8833           88       132     2012      10        11        285              0.038250      13.151276       0.000000       0.165716       0.102000   -9999.000000       0.064800       0.245000
52679     52679     gansu          102.8833       37.8833           88       132     2012      10        12        286              0.037208      13.468384       0.000000       0.161962       0.098000   -9999.000000       0.052300       0.091000
52679     52679     gansu          102.8833       37.8833           88       132     2012      10        13        287              0.036542      13.394806       0.000000       0.159165       0.093500       0.021900       0.059600   -9999.000000
52679     52679     gansu          102.8833       37.8833           88       132     2012      10        14        288              0.035833      13.003174       0.308255       0.157530       0.097000   -9999.000000       0.059100       0.218000
52679     52679     gansu          102.8833       37.8833           88       132     2012      10        15        289              0.035292      13.320953       1.050222       0.157223       0.087000   -9999.000000   -9999.000000       0.461000
52679     52679     gansu          102.8833       37.8833           88       132     2012      10        16        290              0.035042       9.965759       0.495981       0.170067       0.096000   -9999.000000       0.070700       0.047000
52679     52679     gansu          102.8833       37.8833           88       132     2012      10        17        291              0.034708       8.086609       0.000000       0.172558       0.097000   -9999.000000       0.075900   -9999.000000
52679     52679     gansu          102.8833       37.8833           88       132     2012      10        18        292              0.034500      10.347504       0.000000       0.167661       0.096500       0.040700       0.065700   -9999.000000
52679     52679     gansu          102.8833       37.8833           88       132     2012      10        19        293              0.034042      11.610199       0.000000       0.163295       0.093000       0.167700       0.063100       0.209000
52679     52679     gansu          102.8833       37.8833           88       132     2012      10        20        294              0.033875      11.875916       0.055194       0.159998       0.088000   -9999.000000   -9999.000000       0.129000
52679     52679     gansu          102.8833       37.8833           88       132     2012      10        21        295              0.034565      11.560760       0.229944       0.157849   -9999.000000   -9999.000000       0.069400       0.066000
52679     52679     gansu          102.8833       37.8833           88       132     2012      10        22        296              0.000000       7.364990       0.000000       0.158838   -9999.000000   -9999.000000       0.054900       0.163000
52679     52679     gansu          102.8833       37.8833           88       132     2012      10        23        297              0.036235       9.050751       0.431185       0.157615   -9999.000000   -9999.000000       0.074400   -9999.000000
52679     52679     gansu          102.8833       37.8833           88       132     2012      10        24        298              0.036292       8.146423       0.000000       0.161089   -9999.000000   -9999.000000       0.065600       0.086000
52679     52679     gansu          102.8833       37.8833           88       132     2012      10        25        299              0.000000       8.729492       0.168820       0.159086       0.088000   -9999.000000       0.064800       0.146000
52679     52679     gansu          102.8833       37.8833           88       132     2012      10        26        300              0.036625       6.801239       0.000000       0.158765       0.098500   -9999.000000   -9999.000000       0.120000
52679     52679     gansu          102.8833       37.8833           88       132     2012      10        27        301              0.036333       9.280212       0.205525       0.157585       0.093000   -9999.000000       0.064800       0.126000
52679     52679     gansu          102.8833       37.8833           88       132     2012      10        28        302              0.000000       9.192749       0.000000       0.158131       0.097500   -9999.000000       0.068300   -9999.000000
52679     52679     gansu          102.8833       37.8833           88       132     2012      10        29        303              0.035958       9.662506       0.000000       0.156969       0.095000   -9999.000000       0.057800       0.018000
52679     52679     gansu          102.8833       37.8833           88       132     2012      10        30        304              0.035458       7.534576       0.704562       0.155361       0.093000   -9999.000000       0.059600   -9999.000000
52679     52679     gansu          102.8833       37.8833           88       132     2012      10        31        305              0.035375       7.142944       0.000000       0.154798       0.091000   -9999.000000       0.059600       0.024000
52679     52679     gansu          102.8833       37.8833           88       132     2012      11        01        306              0.035208       7.877716       0.000000       0.161084       0.090000   -9999.000000   -9999.000000   -9999.000000
52679     52679     gansu          102.8833       37.8833           88       132     2012      11        02        307              0.034818       7.951477       1.613718       0.158544   -9999.000000       0.062100       0.062800       0.174000
52679     52679     gansu          102.8833       37.8833           88       132     2012      11        03        308              0.034625       2.578705       0.458436       0.164649       0.095000   -9999.000000       0.069400       0.045000
52679     52679     gansu          102.8833       37.8833           88       132     2012      11        04        309              0.034750       0.337402       1.081136       0.162598       0.099000       0.059200       0.069600       0.201000
52679     52679     gansu          102.8833       37.8833           88       132     2012      11        05        310              0.035125       2.135742       1.451349       0.165713       0.093000   -9999.000000       0.063700       0.213000
52679     52679     gansu          102.8833       37.8833           88       132     2012      11        06        311              0.035292       3.351166       0.000000       0.179363   -9999.000000   -9999.000000   -9999.000000   -9999.000000
52679     52679     gansu          102.8833       37.8833           88       132     2012      11        07        312              0.035542       3.708405       0.031588       0.178901   -9999.000000   -9999.000000       0.065700       0.144000
52679     52679     gansu          102.8833       37.8833           88       132     2012      11        08        313              0.035583       4.179413       0.000000       0.174020       0.100000   -9999.000000       0.049300       0.177000
52679     52679     gansu          102.8833       37.8833           88       132     2012      11        09        314              0.035875       4.232513       0.000000       0.173487       0.097000   -9999.000000       0.053400       0.045000
52679     52679     gansu          102.8833       37.8833           88       132     2012      11        10        315              0.035667       1.154877       0.780756       0.163242   -9999.000000   -9999.000000       0.057100       0.065000
52679     52679     gansu          102.8833       37.8833           88       132     2012      11        11        316              0.035917      -1.763885       0.076328       0.156529       0.103000   -9999.000000       0.064600   -9999.000000
52679     52679     gansu          102.8833       37.8833           88       132     2012      11        12        317              0.036125       0.516876       0.000000       0.164666   -9999.000000   -9999.000000   -9999.000000       0.196000
52679     52679     gansu          102.8833       37.8833           88       132     2012      11        13        318              0.000000       1.686768       0.000000       0.168278   -9999.000000   -9999.000000       0.067400       0.214000
52679     52679     gansu          102.8833       37.8833           88       132     2012      11        14        319              0.036875       3.356140       0.000000       0.170409       0.094000   -9999.000000       0.071500       0.051000
52679     52679     gansu          102.8833       37.8833           88       132     2012      11        15        320              0.037125       2.348328       0.000000       0.168737       0.095000   -9999.000000       0.061800       0.045000
52679     52679     gansu          102.8833       37.8833           88       132     2012      11        16        321              0.037083       1.162933       0.000000       0.164345       0.091000   -9999.000000       0.062200   -9999.000000
52679     52679     gansu          102.8833       37.8833           88       132     2012      11        17        322              0.000000       3.033600       0.000000       0.167200   -9999.000000       0.132400       0.063600       0.092000
52679     52679     gansu          102.8833       37.8833           88       132     2012      11        18        323              0.037542       3.425903       0.000000       0.167253   -9999.000000   -9999.000000       0.071700       0.157000
52679     52679     gansu          102.8833       37.8833           88       132     2012      11        19        324              0.037250       2.305389       0.064714       0.162659       0.093000       0.043300       0.048600       0.072000
52679     52679     gansu          102.8833       37.8833           88       132     2012      11        20        325              0.037542       1.100739       0.000000       0.158795       0.092000   -9999.000000       0.072900       0.054000
52679     52679     gansu          102.8833       37.8833           88       132     2012      11        21        326              0.038250       1.152649       0.000000       0.159085       0.087000   -9999.000000       0.065100   -9999.000000
52679     52679     gansu          102.8833       37.8833           88       132     2012      11        22        327              0.037917       0.445953       0.000000       0.158595   -9999.000000       0.132000       0.057700       0.079000
52679     52679     gansu          102.8833       37.8833           88       132     2012      11        23        328              0.036250      -2.236084       0.000000       0.150017   -9999.000000   -9999.000000   -9999.000000       0.192000
52679     52679     gansu          102.8833       37.8833           88       132     2012      11        24        329              0.035792      -1.524536       0.000000       0.150200   -9999.000000   -9999.000000       0.066100       0.135000
52679     52679     gansu          102.8833       37.8833           88       132     2012      11        25        330              0.035875      -1.554443       0.000000       0.150853   -9999.000000   -9999.000000       0.072100       0.064000
52679     52679     gansu          102.8833       37.8833           88       132     2012      11        26        331              0.035250      -2.703827       3.185666       0.147410       0.094000   -9999.000000       0.022700   -9999.000000
52679     52679     gansu          102.8833       37.8833           88       132     2012      11        27        332              0.034708      -1.769196       0.000000       0.166669       0.088000       0.122300       0.063200       0.010000
52679     52679     gansu          102.8833       37.8833           88       132     2012      11        28        333              0.034143      -2.626160       0.000000       0.156464   -9999.000000   -9999.000000       0.065800   -9999.000000
52679     52679     gansu          102.8833       37.8833           88       132     2012      11        29        334              0.034542      -2.905243       0.000000       0.151428   -9999.000000   -9999.000000   -9999.000000       0.140000
52679     52679     gansu          102.8833       37.8833           88       132     2012      11        30        335              0.034000      -2.144409       0.000000       0.155034   -9999.000000   -9999.000000       0.063000   -9999.000000
52679     52679     gansu          102.8833       37.8833           88       132     2012      12        01        336              0.034500      -3.411255       0.000000       0.144725       0.092000   -9999.000000       0.071000       0.052000
52679     52679     gansu          102.8833       37.8833           88       132     2012      12        02        337              0.033706      -1.968689       0.068287       0.154780   -9999.000000   -9999.000000       0.050500       0.057000
52679     52679     gansu          102.8833       37.8833           88       132     2012      12        03        338              0.034217      -4.515656       0.000000       0.139187   -9999.000000   -9999.000000       0.055700       0.159000
52679     52679     gansu          102.8833       37.8833           88       132     2012      12        04        339              0.033875      -1.778748       0.000000       0.153932   -9999.000000   -9999.000000   -9999.000000       0.064000
52679     52679     gansu          102.8833       37.8833           88       132     2012      12        05        340              0.034000      -4.041809       0.899415       0.145214       0.101000       0.125100       0.072200   -9999.000000
52679     52679     gansu          102.8833       37.8833           88       132     2012      12        06        341              0.034708      -1.742004       0.000000       0.153253   -9999.000000   -9999.000000       0.036500       0.034000
52679     52679     gansu          102.8833       37.8833           88       132     2012      12        07        342              0.033875      -2.342865       0.000000       0.154185       0.093000       0.042700       0.071900       0.072000
52679     52679     gansu          102.8833       37.8833           88       132     2012      12        08        343              0.033500      -3.743378       0.000000       0.146883       0.085000   -9999.000000       0.056800   -9999.000000
52679     52679     gansu          102.8833       37.8833           88       132     2012      12        09        344              0.033542      -4.319855       0.000000       0.143127   -9999.000000   -9999.000000       0.056600       0.075000
52679     52679     gansu          102.8833       37.8833           88       132     2012      12        10        345              0.034125      -3.274323       1.262249       0.145992   -9999.000000       0.094400   -9999.000000   -9999.000000
52679     52679     gansu          102.8833       37.8833           88       132     2012      12        11        346              0.034458      -2.112549       0.000000       0.151909       0.091000   -9999.000000       0.071800       0.068000
52679     52679     gansu          102.8833       37.8833           88       132     2012      12        12        347              0.033958      -1.578888       0.000000       0.153848       0.085000       0.001200       0.073700       0.198000
52679     52679     gansu          102.8833       37.8833           88       132     2012      12        13        348              0.033833      -2.392761       0.000000       0.151298   -9999.000000   -9999.000000       0.038100       0.008000
52679     52679     gansu          102.8833       37.8833           88       132     2012      12        14        349              0.033708      -3.632660       0.364660       0.145396   -9999.000000   -9999.000000       0.061100       0.074000
52679     52679     gansu          102.8833       37.8833           88       132     2012      12        15        350              0.000000      -2.751465       0.580640       0.149238   -9999.000000       0.121500       0.064000   -9999.000000
52679     52679     gansu          102.8833       37.8833           88       132     2012      12        16        351              0.033208      -3.575317       0.000000       0.146148   -9999.000000   -9999.000000   -9999.000000       0.045000
52679     52679     gansu          102.8833       37.8833           88       132     2012      12        17        352              0.033125      -5.608276       0.101158       0.135047   -9999.000000   -9999.000000       0.059800       0.050000
52679     52679     gansu          102.8833       37.8833           88       132     2012      12        18        353              0.033250      -5.082520       0.066083       0.137895   -9999.000000   -9999.000000       0.069500       0.079000
52679     52679     gansu          102.8833       37.8833           88       132     2012      12        19        354              0.033000      -5.279053       0.529685       0.138943   -9999.000000   -9999.000000       0.058600       0.001000
52679     52679     gansu          102.8833       37.8833           88       132     2012      12        20        355              0.000000      -6.499634       0.000000       0.127170   -9999.000000   -9999.000000       0.055400   -9999.000000
52679     52679     gansu          102.8833       37.8833           88       132     2012      12        21        356              0.033000      -6.908508       0.000000       0.127380   -9999.000000   -9999.000000   -9999.000000       0.029000
52679     52679     gansu          102.8833       37.8833           88       132     2012      12        22        357              0.032625      -8.688812       0.000000       0.124324   -9999.000000   -9999.000000       0.050300       0.035000
52679     52679     gansu          102.8833       37.8833           88       132     2012      12        23        358              0.032167     -11.966370       0.000000       0.119543   -9999.000000   -9999.000000       0.024500       0.076000
52679     52679     gansu          102.8833       37.8833           88       132     2012      12        24        359              0.032105     -10.649323       0.000000       0.117287   -9999.000000   -9999.000000       0.075900   -9999.000000
52679     52679     gansu          102.8833       37.8833           88       132     2012      12        25        360              0.032458      -8.975861       0.000000       0.120746   -9999.000000   -9999.000000       0.058200   -9999.000000
52679     52679     gansu          102.8833       37.8833           88       132     2012      12        26        361              0.000000      -8.061584       0.000000       0.120807   -9999.000000   -9999.000000       0.061700       0.028000
52679     52679     gansu          102.8833       37.8833           88       132     2012      12        27        362              0.032417      -6.762573       0.000000       0.129830   -9999.000000   -9999.000000   -9999.000000   -9999.000000
52679     52679     gansu          102.8833       37.8833           88       132     2012      12        28        363              0.000000      -7.837433       0.000000       0.123777   -9999.000000   -9999.000000       0.064300       0.056000
52679     52679     gansu          102.8833       37.8833           88       132     2012      12        29        364              0.000000     -11.268738       0.000000       0.120494   -9999.000000   -9999.000000       0.073400   -9999.000000
52679     52679     gansu          102.8833       37.8833           88       132     2012      12        30        365              0.000000     -12.439758       0.000000       0.115422   -9999.000000   -9999.000000       0.040800       0.072000
52679     52679     gansu          102.8833       37.8833           88       132     2012      12        31        366              0.032000      -9.772369       0.000000       0.118937   -9999.000000   -9999.000000       0.051500       0.077000
