# Supplementary material for: Research on Fusing Multisatellite Soil Moisture Data Based on Bayesian Model Averaging
Source: Hindawi journal article supplement (doi:10.1155/2018/9310838), 2018-06-25
Supplement: f1 [file 9310838.f1.zip › 2012_sm00-10cm_daily_ZDB_ZHY_52797_366days_allin.txt]

52797     52797     gansu          104.0900       37.1600           91       136     2012      01        01        001              0.000000   -9999.000000       0.000000   -9999.000000   -9999.000000   -9999.000000   -9999.000000   -9999.000000
52797     52797     gansu          104.0900       37.1600           91       136     2012      01        02        002              0.260333      -7.614380       0.043142       0.079466   -9999.000000   -9999.000000       0.064300   -9999.000000
52797     52797     gansu          104.0900       37.1600           91       136     2012      01        03        003              0.000000      -9.224609       3.016936       0.078857   -9999.000000   -9999.000000       0.072800       0.177000
52797     52797     gansu          104.0900       37.1600           91       136     2012      01        04        004              0.218500      -9.805450       0.035767       0.077274   -9999.000000   -9999.000000       0.056600       0.250000
52797     52797     gansu          104.0900       37.1600           91       136     2012      01        05        005              0.225500      -8.460632       0.707180       0.080061   -9999.000000   -9999.000000       0.061100       0.132000
52797     52797     gansu          104.0900       37.1600           91       136     2012      01        06        006              0.229909      -7.998779       0.000000       0.085104   -9999.000000   -9999.000000       0.060000       0.205000
52797     52797     gansu          104.0900       37.1600           91       136     2012      01        07        007              0.227217      -7.752960       0.000000       0.084218   -9999.000000   -9999.000000   -9999.000000   -9999.000000
52797     52797     gansu          104.0900       37.1600           91       136     2012      01        08        008              0.000000      -7.556427       0.000000       0.084573   -9999.000000   -9999.000000       0.064700       0.180000
52797     52797     gansu          104.0900       37.1600           91       136     2012      01        09        009              0.231583      -7.372040       0.000000       0.085405   -9999.000000   -9999.000000   -9999.000000       0.195000
52797     52797     gansu          104.0900       37.1600           91       136     2012      01        10        010              0.223292      -7.712189       0.000000       0.084537   -9999.000000   -9999.000000   -9999.000000       0.106000
52797     52797     gansu          104.0900       37.1600           91       136     2012      01        11        011              0.221652      -7.924805       0.000000       0.083377   -9999.000000   -9999.000000       0.059700       0.201000
52797     52797     gansu          104.0900       37.1600           91       136     2012      01        12        012              0.211875      -7.311401       0.000000       0.088115   -9999.000000   -9999.000000   -9999.000000   -9999.000000
52797     52797     gansu          104.0900       37.1600           91       136     2012      01        13        013              0.222417      -7.512665       0.000000       0.084199   -9999.000000   -9999.000000       0.066200       0.254000
52797     52797     gansu          104.0900       37.1600           91       136     2012      01        14        014              0.230667      -7.758362       0.000000       0.080781   -9999.000000   -9999.000000       0.066800       0.215000
52797     52797     gansu          104.0900       37.1600           91       136     2012      01        15        015              0.232130      -7.046783       0.178284       0.087561   -9999.000000   -9999.000000       0.070600       0.127000
52797     52797     gansu          104.0900       37.1600           91       136     2012      01        16        016              0.248167      -4.879211       0.000000       0.100860   -9999.000000   -9999.000000       0.053500       0.199000
52797     52797     gansu          104.0900       37.1600           91       136     2012      01        17        017              0.000000      -4.248596       0.095935       0.104453   -9999.000000   -9999.000000       0.066700   -9999.000000
52797     52797     gansu          104.0900       37.1600           91       136     2012      01        18        018              0.255000      -5.281128       0.000000       0.096378   -9999.000000   -9999.000000   -9999.000000       0.011000
52797     52797     gansu          104.0900       37.1600           91       136     2012      01        19        019              0.262292      -5.895355       0.780977       0.092301   -9999.000000   -9999.000000       0.053000   -9999.000000
52797     52797     gansu          104.0900       37.1600           91       136     2012      01        20        020              0.263583      -7.868073       1.307100       0.083343   -9999.000000   -9999.000000       0.054300       0.045000
52797     52797     gansu          104.0900       37.1600           91       136     2012      01        21        021              0.253375      -8.832489       0.389392       0.079749   -9999.000000   -9999.000000       0.046800   -9999.000000
52797     52797     gansu          104.0900       37.1600           91       136     2012      01        22        022              0.233174     -11.668304       3.551322       0.077956   -9999.000000   -9999.000000       0.045900       0.076000
52797     52797     gansu          104.0900       37.1600           91       136     2012      01        23        023              0.214217      -9.915527       0.775813       0.077225   -9999.000000   -9999.000000       0.043500       0.084000
52797     52797     gansu          104.0900       37.1600           91       136     2012      01        24        024              0.218292      -8.397797       0.162102       0.077994   -9999.000000   -9999.000000   -9999.000000   -9999.000000
52797     52797     gansu          104.0900       37.1600           91       136     2012      01        25        025              0.228500      -7.637573       0.152919       0.078667   -9999.000000   -9999.000000       0.043400       0.055000
52797     52797     gansu          104.0900       37.1600           91       136     2012      01        26        026              0.243250      -7.240936       0.455714       0.080394   -9999.000000   -9999.000000       0.046000   -9999.000000
52797     52797     gansu          104.0900       37.1600           91       136     2012      01        27        027              0.263208      -7.043549       0.000000       0.081899   -9999.000000   -9999.000000       0.041600   -9999.000000
52797     52797     gansu          104.0900       37.1600           91       136     2012      01        28        028              0.274292      -7.238861       0.000000       0.082502   -9999.000000   -9999.000000       0.045100       0.146000
52797     52797     gansu          104.0900       37.1600           91       136     2012      01        29        029              0.287125      -7.836761       0.000000       0.073753   -9999.000000   -9999.000000   -9999.000000       0.080000
52797     52797     gansu          104.0900       37.1600           91       136     2012      01        30        030              0.295125      -7.379913       0.000000       0.082599   -9999.000000   -9999.000000       0.044800       0.090000
52797     52797     gansu          104.0900       37.1600           91       136     2012      01        31        031              0.312833      -5.153015       0.000000       0.095577   -9999.000000   -9999.000000       0.046500   -9999.000000
52797     52797     gansu          104.0900       37.1600           91       136     2012      02        01        032              0.304917      -4.161346       0.000000       0.109963   -9999.000000   -9999.000000       0.050600       0.194000
52797     52797     gansu          104.0900       37.1600           91       136     2012      02        02        033              0.304875      -6.936676       0.000000       0.090406   -9999.000000   -9999.000000       0.043300       0.219000
52797     52797     gansu          104.0900       37.1600           91       136     2012      02        03        034              0.321417      -6.306122       0.000000       0.084586   -9999.000000   -9999.000000       0.046500       0.104000
52797     52797     gansu          104.0900       37.1600           91       136     2012      02        04        035              0.330208      -4.875793       0.000000       0.101853   -9999.000000   -9999.000000   -9999.000000       0.161000
52797     52797     gansu          104.0900       37.1600           91       136     2012      02        05        036              0.334792      -2.424164       0.000000       0.119722   -9999.000000   -9999.000000       0.050800   -9999.000000
52797     52797     gansu          104.0900       37.1600           91       136     2012      02        06        037              0.298609      -3.249847       0.000000       0.117158   -9999.000000   -9999.000000       0.053800       0.018000
52797     52797     gansu          104.0900       37.1600           91       136     2012      02        07        038              0.280792      -8.472900       0.000000       0.083376   -9999.000000   -9999.000000       0.044300       0.215000
52797     52797     gansu          104.0900       37.1600           91       136     2012      02        08        039              0.282000      -9.019806       0.000000       0.080521   -9999.000000   -9999.000000       0.050600       0.095000
52797     52797     gansu          104.0900       37.1600           91       136     2012      02        09        040              0.276409      -9.250275       0.000000       0.078286   -9999.000000   -9999.000000       0.050400       0.142000
52797     52797     gansu          104.0900       37.1600           91       136     2012      02        10        041              0.280458      -9.876801       0.000000       0.078080   -9999.000000   -9999.000000   -9999.000000   -9999.000000
52797     52797     gansu          104.0900       37.1600           91       136     2012      02        11        042              0.296750      -5.845276       0.000000       0.094369   -9999.000000   -9999.000000       0.056700       0.253000
52797     52797     gansu          104.0900       37.1600           91       136     2012      02        12        043              0.312458      -4.132874       0.827566       0.103374   -9999.000000   -9999.000000   -9999.000000       0.210000
52797     52797     gansu          104.0900       37.1600           91       136     2012      02        13        044              0.309292      -2.303833       0.126254       0.117624   -9999.000000   -9999.000000       0.055200       0.124000
52797     52797     gansu          104.0900       37.1600           91       136     2012      02        14        045              0.309292      -2.245300       0.000000       0.120987   -9999.000000   -9999.000000   -9999.000000       0.019000
52797     52797     gansu          104.0900       37.1600           91       136     2012      02        15        046              0.297167      -3.451599       0.000000       0.109464   -9999.000000   -9999.000000   -9999.000000   -9999.000000
52797     52797     gansu          104.0900       37.1600           91       136     2012      02        16        047              0.283522      -5.128510       0.000000       0.100646   -9999.000000   -9999.000000       0.059200       0.237000
52797     52797     gansu          104.0900       37.1600           91       136     2012      02        17        048              0.273000      -5.955872       0.000000       0.098329   -9999.000000   -9999.000000       0.057600   -9999.000000
52797     52797     gansu          104.0900       37.1600           91       136     2012      02        18        049              0.274708      -7.367950       0.316526       0.086377   -9999.000000   -9999.000000       0.066700       0.179000
52797     52797     gansu          104.0900       37.1600           91       136     2012      02        19        050              0.294208      -4.552124       0.234617       0.102557   -9999.000000   -9999.000000       0.058300       0.071000
52797     52797     gansu          104.0900       37.1600           91       136     2012      02        20        051              0.302375      -0.990082       0.135696       0.126523   -9999.000000   -9999.000000       0.058600       0.201000
52797     52797     gansu          104.0900       37.1600           91       136     2012      02        21        052              0.311750       0.767212       0.071305       0.139336       0.074000   -9999.000000   -9999.000000       0.212000
52797     52797     gansu          104.0900       37.1600           91       136     2012      02        22        053              0.309208       2.528351       0.533443       0.153044   -9999.000000   -9999.000000       0.064900       0.142000
52797     52797     gansu          104.0900       37.1600           91       136     2012      02        23        054              0.299125       1.794678       0.371905       0.151088   -9999.000000   -9999.000000       0.069200       0.175000
52797     52797     gansu          104.0900       37.1600           91       136     2012      02        24        055              0.284125      -1.658173       0.000000       0.124585   -9999.000000   -9999.000000       0.060300   -9999.000000
52797     52797     gansu          104.0900       37.1600           91       136     2012      02        25        056              0.273125      -4.479431       0.000000       0.101492   -9999.000000   -9999.000000       0.060800       0.149000
52797     52797     gansu          104.0900       37.1600           91       136     2012      02        26        057              0.282667      -6.140594       0.118753       0.087307   -9999.000000   -9999.000000       0.059600       0.225000
52797     52797     gansu          104.0900       37.1600           91       136     2012      02        27        058              0.293625      -1.837646       0.209795       0.119614       0.080000   -9999.000000       0.067600       0.127000
52797     52797     gansu          104.0900       37.1600           91       136     2012      02        28        059              0.298217       0.874176       0.000000       0.137805       0.073000   -9999.000000   -9999.000000       0.225000
52797     52797     gansu          104.0900       37.1600           91       136     2012      02        29        060              0.000000   -9999.000000       0.000000   -9999.000000       0.068000   -9999.000000   -9999.000000   -9999.000000
52797     52797     gansu          104.0900       37.1600           91       136     2012      03        01        061              0.307000       1.371796       0.872208       0.142258   -9999.000000   -9999.000000       0.059000       0.261000
52797     52797     gansu          104.0900       37.1600           91       136     2012      03        02        062              0.296136       2.915985       0.639820       0.154442   -9999.000000   -9999.000000       0.074700       0.316000
52797     52797     gansu          104.0900       37.1600           91       136     2012      03        03        063              0.309875       0.865448       0.433080       0.143786       0.075000   -9999.000000   -9999.000000       0.213000
52797     52797     gansu          104.0900       37.1600           91       136     2012      03        04        064              0.312375       1.975189       0.000000       0.156549   -9999.000000   -9999.000000       0.054200       0.060000
52797     52797     gansu          104.0900       37.1600           91       136     2012      03        05        065              0.304957      -0.298492       1.237472       0.134252   -9999.000000       0.383400       0.060600   -9999.000000
52797     52797     gansu          104.0900       37.1600           91       136     2012      03        06        066              0.152609      -1.650452       0.193575       0.126448   -9999.000000   -9999.000000       0.065000       0.340000
52797     52797     gansu          104.0900       37.1600           91       136     2012      03        07        067              0.000000      -0.303986       0.167101       0.133842   -9999.000000   -9999.000000       0.059700       0.235000
52797     52797     gansu          104.0900       37.1600           91       136     2012      03        08        068              0.045565      -0.240601       3.674704       0.134093   -9999.000000   -9999.000000       0.072800       0.254000
52797     52797     gansu          104.0900       37.1600           91       136     2012      03        09        069              0.052182      -0.989532       0.120340       0.136825   -9999.000000   -9999.000000   -9999.000000       0.168000
52797     52797     gansu          104.0900       37.1600           91       136     2012      03        10        070              0.061333       0.624023       0.210872       0.146279       0.069000   -9999.000000       0.059700   -9999.000000
52797     52797     gansu          104.0900       37.1600           91       136     2012      03        11        071              0.063292       1.224792       0.319278       0.147976   -9999.000000       0.039600       0.068100       0.226000
52797     52797     gansu          104.0900       37.1600           91       136     2012      03        12        072              0.064000       1.537964       0.727561       0.149286   -9999.000000   -9999.000000       0.056300       0.249000
52797     52797     gansu          104.0900       37.1600           91       136     2012      03        13        073              0.064375       3.210327       0.080122       0.161928       0.076000   -9999.000000       0.057400       0.231000
52797     52797     gansu          104.0900       37.1600           91       136     2012      03        14        074              0.076042       4.943634       0.000000       0.172045       0.073000   -9999.000000   -9999.000000       0.229000
52797     52797     gansu          104.0900       37.1600           91       136     2012      03        15        075              0.071348       5.921234       0.115724       0.182003       0.070000   -9999.000000       0.070000   -9999.000000
52797     52797     gansu          104.0900       37.1600           91       136     2012      03        16        076              0.062727       5.163971       0.000000       0.171716   -9999.000000       0.096600       0.062900       0.300000
52797     52797     gansu          104.0900       37.1600           91       136     2012      03        17        077              0.062792       5.707184       1.890261       0.175041   -9999.000000   -9999.000000       0.065500   -9999.000000
52797     52797     gansu          104.0900       37.1600           91       136     2012      03        18        078              0.043227       6.720825       0.036915       0.172463   -9999.000000   -9999.000000       0.058400       0.237000
52797     52797     gansu          104.0900       37.1600           91       136     2012      03        19        079              0.055167       3.466309       0.000000       0.162617       0.073000   -9999.000000       0.061200   -9999.000000
52797     52797     gansu          104.0900       37.1600           91       136     2012      03        20        080              0.060750       5.763153       0.000000       0.167712       0.067000   -9999.000000   -9999.000000       0.218000
52797     52797     gansu          104.0900       37.1600           91       136     2012      03        21        081              0.044217       7.358368       0.301568       0.174069   -9999.000000   -9999.000000       0.065000       0.290000
52797     52797     gansu          104.0900       37.1600           91       136     2012      03        22        082              0.033750       2.807007       0.198454       0.153108   -9999.000000   -9999.000000       0.060000       0.152000
52797     52797     gansu          104.0900       37.1600           91       136     2012      03        23        083              0.033792       0.845398       0.080583       0.136022   -9999.000000   -9999.000000       0.071500       0.279000
52797     52797     gansu          104.0900       37.1600           91       136     2012      03        24        084              0.036208       4.041382       0.000000       0.150349       0.072000       0.066100       0.056600   -9999.000000
52797     52797     gansu          104.0900       37.1600           91       136     2012      03        25        085              0.000000       5.978607       0.000000       0.158193       0.073000   -9999.000000       0.057600       0.308000
52797     52797     gansu          104.0900       37.1600           91       136     2012      03        26        086              0.035250       7.471375       0.818380       0.161714       0.057000   -9999.000000   -9999.000000   -9999.000000
52797     52797     gansu          104.0900       37.1600           91       136     2012      03        27        087              0.056625       8.279602       0.110962       0.169539   -9999.000000   -9999.000000       0.061100       0.184000
52797     52797     gansu          104.0900       37.1600           91       136     2012      03        28        088              0.047417       9.808563       0.000000       0.166469   -9999.000000   -9999.000000       0.070000       0.314000
52797     52797     gansu          104.0900       37.1600           91       136     2012      03        29        089              0.036625       9.138641       3.814157       0.161591       0.069000       0.022600       0.056900   -9999.000000
52797     52797     gansu          104.0900       37.1600           91       136     2012      03        30        090              0.022083       7.892426       0.390078       0.154507       0.072000   -9999.000000       0.054800       0.322000
52797     52797     gansu          104.0900       37.1600           91       136     2012      03        31        091              0.026583       5.506256       0.650782       0.150233       0.071000   -9999.000000       0.058600       0.329000
52797     52797     gansu          104.0900       37.1600           91       136     2012      04        01        092              0.024875       9.798004       0.049454       0.153831   -9999.000000       0.012200       0.077600       0.222000
52797     52797     gansu          104.0900       37.1600           91       136     2012      04        02        093              0.015917       9.388458       1.368730       0.150687   -9999.000000   -9999.000000       0.058100       0.287000
52797     52797     gansu          104.0900       37.1600           91       136     2012      04        03        094              0.026375       6.530609       0.459672       0.160695       0.076000   -9999.000000       0.066800   -9999.000000
52797     52797     gansu          104.0900       37.1600           91       136     2012      04        04        095              0.027125       9.660400       0.000000       0.160362       0.075000   -9999.000000       0.057000       0.317000
52797     52797     gansu          104.0900       37.1600           91       136     2012      04        05        096              0.014250      11.233856       0.000000       0.155046       0.065000   -9999.000000       0.056400       0.334000
52797     52797     gansu          104.0900       37.1600           91       136     2012      04        06        097              0.012583       9.873840       0.418393       0.150969       0.067000   -9999.000000   -9999.000000       0.192000
52797     52797     gansu          104.0900       37.1600           91       136     2012      04        07        098              0.018708       8.555054       0.061387       0.149513   -9999.000000   -9999.000000       0.061600       0.298000
52797     52797     gansu          104.0900       37.1600           91       136     2012      04        08        099              0.014125      11.694000       0.000000       0.147477       0.073000       0.036200       0.065500   -9999.000000
52797     52797     gansu          104.0900       37.1600           91       136     2012      04        09        100              0.010042      13.876740       0.993678       0.142439       0.067000   -9999.000000       0.069500       0.334000
52797     52797     gansu          104.0900       37.1600           91       136     2012      04        10        101              0.013958      12.667633       0.024965       0.139619       0.072000   -9999.000000       0.055600       0.354000
52797     52797     gansu          104.0900       37.1600           91       136     2012      04        11        102              0.000000      13.397278       0.430831       0.136787   -9999.000000   -9999.000000       0.080400       0.281000
52797     52797     gansu          104.0900       37.1600           91       136     2012      04        12        103              0.001125       2.798492       1.955549       0.132493   -9999.000000   -9999.000000   -9999.000000       0.269000
52797     52797     gansu          104.0900       37.1600           91       136     2012      04        13        104              0.005708       6.992737       0.000000       0.166297   -9999.000000   -9999.000000       0.062300   -9999.000000
52797     52797     gansu          104.0900       37.1600           91       136     2012      04        14        105              0.009792      10.482269       0.000000       0.160960       0.067000       0.066900       0.069700       0.359000
52797     52797     gansu          104.0900       37.1600           91       136     2012      04        15        106              0.005250      12.357086       1.404250       0.152645       0.064000   -9999.000000       0.054300   -9999.000000
52797     52797     gansu          104.0900       37.1600           91       136     2012      04        16        107              0.003000      12.279572       0.157388       0.147343       0.061000   -9999.000000       0.056400       0.271000
52797     52797     gansu          104.0900       37.1600           91       136     2012      04        17        108              0.001333      12.982452       0.000000       0.144754   -9999.000000   -9999.000000   -9999.000000   -9999.000000
52797     52797     gansu          104.0900       37.1600           91       136     2012      04        18        109              0.003042      12.397614       6.206621       0.142645   -9999.000000   -9999.000000   -9999.000000       0.239000
52797     52797     gansu          104.0900       37.1600           91       136     2012      04        19        110              0.000000      13.775604      17.759886       0.138504   -9999.000000   -9999.000000       0.066000       0.170000
52797     52797     gansu          104.0900       37.1600           91       136     2012      04        20        111              0.000333      11.005920       0.000000       0.260497       0.062000   -9999.000000       0.067400       0.183000
52797     52797     gansu          104.0900       37.1600           91       136     2012      04        21        112              0.003917      13.417908       0.000000       0.221137       0.059000       0.013400       0.055400       0.303000
52797     52797     gansu          104.0900       37.1600           91       136     2012      04        22        113              0.001292      15.738495       0.000000       0.200435       0.061000   -9999.000000   -9999.000000   -9999.000000
52797     52797     gansu          104.0900       37.1600           91       136     2012      04        23        114              0.000000      17.938965       0.953125       0.186170   -9999.000000   -9999.000000   -9999.000000       0.248000
52797     52797     gansu          104.0900       37.1600           91       136     2012      04        24        115              0.000000      12.492767       0.225879       0.178107       0.068000   -9999.000000       0.058200       0.341000
52797     52797     gansu          104.0900       37.1600           91       136     2012      04        25        116              0.000000       9.749329       0.000000       0.175115       0.069000   -9999.000000       0.068700       0.186000
52797     52797     gansu          104.0900       37.1600           91       136     2012      04        26        117              0.000000      13.132080       0.000000       0.170086       0.058000   -9999.000000       0.054500       0.366000
52797     52797     gansu          104.0900       37.1600           91       136     2012      04        27        118              0.000000      15.147736       0.000000       0.161793       0.056000   -9999.000000       0.054500   -9999.000000
52797     52797     gansu          104.0900       37.1600           91       136     2012      04        28        119              0.000000      17.092621       0.000000       0.154036       0.056000   -9999.000000       0.066600       0.239000
52797     52797     gansu          104.0900       37.1600           91       136     2012      04        29        120              0.000000      18.588135       3.183325       0.147686       0.061000   -9999.000000   -9999.000000       0.413000
52797     52797     gansu          104.0900       37.1600           91       136     2012      04        30        121              0.000000      20.360809       0.083423       0.155572       0.094000   -9999.000000       0.111200       0.714000
52797     52797     gansu          104.0900       37.1600           91       136     2012      05        01        122              0.000000      12.817230       1.264232       0.184215       0.064000   -9999.000000       0.082300       0.282000
52797     52797     gansu          104.0900       37.1600           91       136     2012      05        02        123              0.000250      17.387024       0.170278       0.168774       0.057000       0.096800       0.061700   -9999.000000
52797     52797     gansu          104.0900       37.1600           91       136     2012      05        03        124              0.026625      16.963318      12.545913       0.161219   -9999.000000   -9999.000000       0.124800       0.347000
52797     52797     gansu          104.0900       37.1600           91       136     2012      05        04        125              0.130792      13.930450       0.137849       0.234160   -9999.000000   -9999.000000   -9999.000000       0.591000
52797     52797     gansu          104.0900       37.1600           91       136     2012      05        05        126              0.142583      16.649567       2.587393       0.230759       0.086000   -9999.000000       0.113900       0.228000
52797     52797     gansu          104.0900       37.1600           91       136     2012      05        06        127              0.130042      18.484344       0.122667       0.222131   -9999.000000   -9999.000000       0.103300       0.778000
52797     52797     gansu          104.0900       37.1600           91       136     2012      05        07        128              0.119583      17.449982       2.709121       0.220385   -9999.000000       0.125000       0.097900   -9999.000000
52797     52797     gansu          104.0900       37.1600           91       136     2012      05        08        129              0.119125      18.057220       0.000000       0.205272   -9999.000000   -9999.000000       0.072700       0.344000
52797     52797     gansu          104.0900       37.1600           91       136     2012      05        09        130              0.110000      20.544189       0.119881       0.190764   -9999.000000       0.034100       0.072900       0.340000
52797     52797     gansu          104.0900       37.1600           91       136     2012      05        10        131              0.076375      22.292236       2.360025       0.177712       0.073000   -9999.000000   -9999.000000       0.217000
52797     52797     gansu          104.0900       37.1600           91       136     2012      05        11        132              0.057542      15.993286       1.937173       0.195709   -9999.000000   -9999.000000       0.110800       0.723000
52797     52797     gansu          104.0900       37.1600           91       136     2012      05        12        133              0.080917      10.284485       1.265078       0.210349       0.095000   -9999.000000       0.088300   -9999.000000
52797     52797     gansu          104.0900       37.1600           91       136     2012      05        13        134              0.066708      15.668243       0.280007       0.206914   -9999.000000       0.253900       0.070700       0.324000
52797     52797     gansu          104.0900       37.1600           91       136     2012      05        14        135              0.077250      11.793427       0.000000       0.194401   -9999.000000   -9999.000000       0.073700   -9999.000000
52797     52797     gansu          104.0900       37.1600           91       136     2012      05        15        136              0.076875      15.186432       0.000000       0.181523       0.073000   -9999.000000       0.072200       0.210000
52797     52797     gansu          104.0900       37.1600           91       136     2012      05        16        137              0.066208      17.544403       0.199655       0.169555       0.073500   -9999.000000   -9999.000000   -9999.000000
52797     52797     gansu          104.0900       37.1600           91       136     2012      05        17        138              0.052792      18.969727       0.000000       0.158889       0.067000   -9999.000000       0.076300       0.291000
52797     52797     gansu          104.0900       37.1600           91       136     2012      05        18        139              0.044583      19.337585       0.000000       0.152168       0.059000   -9999.000000       0.086700       0.349000
52797     52797     gansu          104.0900       37.1600           91       136     2012      05        19        140              0.033250      20.666809       0.475632       0.146889       0.072000   -9999.000000       0.071200       0.217000
52797     52797     gansu          104.0900       37.1600           91       136     2012      05        20        141              0.026083      21.867310       2.182607       0.141677       0.081000   -9999.000000       0.080100       0.336000
52797     52797     gansu          104.0900       37.1600           91       136     2012      05        21        142              0.001167      21.732178       0.567860       0.147678       0.104000   -9999.000000   -9999.000000   -9999.000000
52797     52797     gansu          104.0900       37.1600           91       136     2012      05        22        143              0.013375      13.271698       0.118043       0.174253       0.084000       0.124200       0.084200       0.257000
52797     52797     gansu          104.0900       37.1600           91       136     2012      05        23        144              0.107750      16.412720       8.696765       0.164997   -9999.000000   -9999.000000       0.162300       0.860000
52797     52797     gansu          104.0900       37.1600           91       136     2012      05        24        145              0.193000      11.454254       0.000000       0.227372       0.113000   -9999.000000       0.106500       0.513000
52797     52797     gansu          104.0900       37.1600           91       136     2012      05        25        146              0.000000      16.807709       0.634471       0.209241       0.096000       0.082800       0.078700       0.243000
52797     52797     gansu          104.0900       37.1600           91       136     2012      05        26        147              0.163625      18.528717       0.000000       0.192612       0.082000   -9999.000000       0.077700   -9999.000000
52797     52797     gansu          104.0900       37.1600           91       136     2012      05        27        148              0.151292      19.825928       0.000000       0.179345       0.078000   -9999.000000   -9999.000000       0.286000
52797     52797     gansu          104.0900       37.1600           91       136     2012      05        28        149              0.109833      22.742401       1.371213       0.165701   -9999.000000   -9999.000000   -9999.000000       0.304000
52797     52797     gansu          104.0900       37.1600           91       136     2012      05        29        150              0.120042      14.178955       0.000000       0.178082       0.089000   -9999.000000       0.095100       0.225000
52797     52797     gansu          104.0900       37.1600           91       136     2012      05        30        151              0.119833      18.806091       0.000000       0.167379       0.091000   -9999.000000       0.074700   -9999.000000
52797     52797     gansu          104.0900       37.1600           91       136     2012      05        31        152              0.094125      21.539246       0.000000       0.155603       0.082500   -9999.000000       0.076100   -9999.000000
52797     52797     gansu          104.0900       37.1600           91       136     2012      06        01        153              0.095458      18.261780       0.000000       0.151314       0.088500       0.037400       0.074900       0.316000
52797     52797     gansu          104.0900       37.1600           91       136     2012      06        02        154              0.088333      22.122589       0.000000       0.143856       0.086000   -9999.000000       0.086400       0.290000
52797     52797     gansu          104.0900       37.1600           91       136     2012      06        03        155              0.075125      22.755005       0.000000       0.137426   -9999.000000   -9999.000000   -9999.000000       0.230000
52797     52797     gansu          104.0900       37.1600           91       136     2012      06        04        156              0.064625      22.532745       0.000000       0.133496       0.084000   -9999.000000       0.099900       0.273000
52797     52797     gansu          104.0900       37.1600           91       136     2012      06        05        157              0.041542      23.187195       2.377064       0.129890       0.136000   -9999.000000       0.126100   -9999.000000
52797     52797     gansu          104.0900       37.1600           91       136     2012      06        06        158              0.046000      17.475403       5.241248       0.155086       0.124500   -9999.000000       0.095300       0.447000
52797     52797     gansu          104.0900       37.1600           91       136     2012      06        07        159              0.059667      18.196838       0.250346       0.182827       0.100000   -9999.000000   -9999.000000       0.334000
52797     52797     gansu          104.0900       37.1600           91       136     2012      06        08        160              0.060708      19.570923       0.000000       0.197362       0.090000   -9999.000000       0.093100       0.313000
52797     52797     gansu          104.0900       37.1600           91       136     2012      06        09        161              0.070667      20.462677       0.000000       0.178024       0.084000       0.107700       0.089000       0.199000
52797     52797     gansu          104.0900       37.1600           91       136     2012      06        10        162              0.057875      22.828064       0.000000       0.159598       0.085000   -9999.000000       0.097000   -9999.000000
52797     52797     gansu          104.0900       37.1600           91       136     2012      06        11        163              0.000000      21.570740       0.000000       0.147772       0.091000   -9999.000000       0.088400       0.344000
52797     52797     gansu          104.0900       37.1600           91       136     2012      06        12        164              0.030583      22.510284       0.000000       0.138561       0.086000   -9999.000000       0.084000   -9999.000000
52797     52797     gansu          104.0900       37.1600           91       136     2012      06        13        165              0.021042      23.424591       0.000000       0.131717       0.085000   -9999.000000   -9999.000000       0.298000
52797     52797     gansu          104.0900       37.1600           91       136     2012      06        14        166              0.010833      23.324310       0.000000       0.126966       0.088000       0.178300       0.095900   -9999.000000
52797     52797     gansu          104.0900       37.1600           91       136     2012      06        15        167              0.010750      21.337372       0.000000       0.125028       0.081000   -9999.000000       0.105900       0.295000
52797     52797     gansu          104.0900       37.1600           91       136     2012      06        16        168              0.005625      22.895996       0.000000       0.122895       0.081500   -9999.000000       0.088900       0.380000
52797     52797     gansu          104.0900       37.1600           91       136     2012      06        17        169              0.002167      24.555542       2.079650       0.120630       0.108000   -9999.000000       0.102400       0.320000
52797     52797     gansu          104.0900       37.1600           91       136     2012      06        18        170              0.002958      22.365570       2.332409       0.143463       0.096000   -9999.000000       0.084100       0.269000
52797     52797     gansu          104.0900       37.1600           91       136     2012      06        19        171              0.000708      24.537720       1.880002       0.137677       0.089000   -9999.000000       0.100500   -9999.000000
52797     52797     gansu          104.0900       37.1600           91       136     2012      06        20        172              0.000208      24.187195       0.543062       0.128119       0.093000   -9999.000000       0.090300       0.371000
52797     52797     gansu          104.0900       37.1600           91       136     2012      06        21        173              0.000458      24.866425       0.000000       0.123200       0.103500   -9999.000000       0.097200       0.397000
52797     52797     gansu          104.0900       37.1600           91       136     2012      06        22        174              0.000000      26.335327       0.000000       0.119250       0.106000   -9999.000000       0.081900       0.325000
52797     52797     gansu          104.0900       37.1600           91       136     2012      06        23        175              0.000000      26.703522       2.652894       0.116739       0.090000   -9999.000000       0.094600       0.522000
52797     52797     gansu          104.0900       37.1600           91       136     2012      06        24        176              0.000000      21.291595       0.000000       0.142322       0.110000   -9999.000000   -9999.000000   -9999.000000
52797     52797     gansu          104.0900       37.1600           91       136     2012      06        25        177              0.000000      24.191315       0.635003       0.143094       0.107000   -9999.000000       0.130300       0.410000
52797     52797     gansu          104.0900       37.1600           91       136     2012      06        26        178              0.001583      26.544403      16.381754       0.132911       0.123500   -9999.000000       0.229100       0.380000
52797     52797     gansu          104.0900       37.1600           91       136     2012      06        27        179              0.216375      24.513855      16.070175       0.172206       0.241000       0.358100       0.260300       0.887000
52797     52797     gansu          104.0900       37.1600           91       136     2012      06        28        180              0.246208      18.703400      13.403494       0.284793       0.187000   -9999.000000       0.210700       0.971000
52797     52797     gansu          104.0900       37.1600           91       136     2012      06        29        181              0.236792      18.046661       1.804101       0.286124       0.192000   -9999.000000       0.175600   -9999.000000
52797     52797     gansu          104.0900       37.1600           91       136     2012      06        30        182              0.209042      20.915466       0.000000       0.258737       0.142000       0.102500   -9999.000000   -9999.000000
52797     52797     gansu          104.0900       37.1600           91       136     2012      07        01        183              0.186792      23.548737       8.065819       0.238011       0.159000   -9999.000000       0.185600       0.808000
52797     52797     gansu          104.0900       37.1600           91       136     2012      07        02        184              0.173292      22.851685       1.531929       0.258099       0.130500       0.209400       0.154300       0.515000
52797     52797     gansu          104.0900       37.1600           91       136     2012      07        03        185              0.159250      22.190063       0.000000       0.250081       0.126000   -9999.000000       0.117400       0.405000
52797     52797     gansu          104.0900       37.1600           91       136     2012      07        04        186              0.147792      22.757874       0.000000       0.233738       0.106000       0.174800       0.117600   -9999.000000
52797     52797     gansu          104.0900       37.1600           91       136     2012      07        05        187              0.142625      22.833893       0.233778       0.219913   -9999.000000       0.075700   -9999.000000       0.436000
52797     52797     gansu          104.0900       37.1600           91       136     2012      07        06        188              0.112042      24.349304       0.081020       0.207068       0.131000   -9999.000000       0.140900       0.324000
52797     52797     gansu          104.0900       37.1600           91       136     2012      07        07        189              0.121917      17.555084       4.535407       0.206280   -9999.000000   -9999.000000       0.182700       0.266000
52797     52797     gansu          104.0900       37.1600           91       136     2012      07        08        190              0.126458      21.625458       1.638986       0.208322       0.108500   -9999.000000       0.132000       0.285000
52797     52797     gansu          104.0900       37.1600           91       136     2012      07        09        191              0.127625      22.507874       0.000000       0.232438       0.097000   -9999.000000       0.101200   -9999.000000
52797     52797     gansu          104.0900       37.1600           91       136     2012      07        10        192              0.124375      23.474457       0.455022       0.211267       0.109000   -9999.000000       0.109100       0.358000
52797     52797     gansu          104.0900       37.1600           91       136     2012      07        11        193              0.106042      25.308990       1.072962       0.195071       0.101000   -9999.000000   -9999.000000   -9999.000000
52797     52797     gansu          104.0900       37.1600           91       136     2012      07        12        194              0.109083      22.048309       0.201571       0.194552       0.098500   -9999.000000       0.111700       0.312000
52797     52797     gansu          104.0900       37.1600           91       136     2012      07        13        195              0.095000      23.863312       0.978322       0.184864       0.117500   -9999.000000       0.122800   -9999.000000
52797     52797     gansu          104.0900       37.1600           91       136     2012      07        14        196              0.094375      22.522461       0.089389       0.187117       0.100000   -9999.000000       0.098500       0.370000
52797     52797     gansu          104.0900       37.1600           91       136     2012      07        15        197              0.088708      24.666138       0.000000       0.175163       0.089000       0.184100       0.102500       0.334000
52797     52797     gansu          104.0900       37.1600           91       136     2012      07        16        198              0.084292      26.098785       0.000000       0.163969       0.094000   -9999.000000       0.074400   -9999.000000
52797     52797     gansu          104.0900       37.1600           91       136     2012      07        17        199              0.068958      26.457733       1.652668       0.155918       0.138000   -9999.000000   -9999.000000       0.368000
52797     52797     gansu          104.0900       37.1600           91       136     2012      07        18        200              0.070875      22.596008       2.208100       0.171354       0.148500       0.018800       0.114600   -9999.000000
52797     52797     gansu          104.0900       37.1600           91       136     2012      07        19        201              0.090083      20.902679       0.000000       0.197578       0.097000   -9999.000000       0.098500       0.464000
52797     52797     gansu          104.0900       37.1600           91       136     2012      07        20        202              0.099625      25.512268      22.678751       0.179741       0.094000       0.117800       0.097800       0.864000
52797     52797     gansu          104.0900       37.1600           91       136     2012      07        21        203              0.218091      22.399231       1.979755       0.230780       0.196000   -9999.000000       0.148400       0.810000
52797     52797     gansu          104.0900       37.1600           91       136     2012      07        22        204              0.205042      19.070496       1.150988       0.269473       0.130000   -9999.000000   -9999.000000       0.445000
52797     52797     gansu          104.0900       37.1600           91       136     2012      07        23        205              0.185958      22.816040       0.613717       0.238203       0.118500       0.125900       0.102500   -9999.000000
52797     52797     gansu          104.0900       37.1600           91       136     2012      07        24        206              0.198125      21.688873       7.491860       0.229578       0.150000   -9999.000000       0.154600       0.500000
52797     52797     gansu          104.0900       37.1600           91       136     2012      07        25        207              0.213625      19.644257       0.000000       0.253900       0.106000       0.234700       0.113600       0.479000
52797     52797     gansu          104.0900       37.1600           91       136     2012      07        26        208              0.195500      24.276672       0.091698       0.236564       0.099000   -9999.000000       0.091100       0.483000
52797     52797     gansu          104.0900       37.1600           91       136     2012      07        27        209              0.179042      24.267273       1.486468       0.223753       0.143000   -9999.000000       0.110500       0.479000
52797     52797     gansu          104.0900       37.1600           91       136     2012      07        28        210              0.166292      24.317108       1.059232       0.224132       0.126000   -9999.000000   -9999.000000   -9999.000000
52797     52797     gansu          104.0900       37.1600           91       136     2012      07        29        211              0.169083      26.158661      16.160385       0.211140       0.158000   -9999.000000       0.170000       0.468000
52797     52797     gansu          104.0900       37.1600           91       136     2012      07        30        212              0.199208      25.165192       0.773988       0.255571       0.177000   -9999.000000       0.234500       0.800000
52797     52797     gansu          104.0900       37.1600           91       136     2012      07        31        213              0.186625      19.475647       0.320275       0.262500       0.121000   -9999.000000       0.155200       0.630000
52797     52797     gansu          104.0900       37.1600           91       136     2012      08        01        214              0.173875      22.287903       2.471129       0.240284       0.116000   -9999.000000       0.148400       0.541000
52797     52797     gansu          104.0900       37.1600           91       136     2012      08        02        215              0.166167      22.974731       0.646247       0.239253       0.110000       0.216400       0.133000   -9999.000000
52797     52797     gansu          104.0900       37.1600           91       136     2012      08        03        216              0.155708      24.937317       0.000000       0.221071       0.100000   -9999.000000       0.154800       0.365000
52797     52797     gansu          104.0900       37.1600           91       136     2012      08        04        217              0.144875      25.463806       0.000000       0.206772       0.098000   -9999.000000       0.143100       0.429000
52797     52797     gansu          104.0900       37.1600           91       136     2012      08        05        218              0.135708      25.934143       2.342842       0.196639       0.096000   -9999.000000       0.158800       0.404000
52797     52797     gansu          104.0900       37.1600           91       136     2012      08        06        219              0.122667      26.002350       0.000000       0.189958       0.106000   -9999.000000       0.079900       0.293000
52797     52797     gansu          104.0900       37.1600           91       136     2012      08        07        220              0.115958      22.521332       0.212366       0.185374       0.105000   -9999.000000       0.080000   -9999.000000
52797     52797     gansu          104.0900       37.1600           91       136     2012      08        08        221              0.117125      21.133759       0.821858       0.185229       0.101500   -9999.000000   -9999.000000       0.506000
52797     52797     gansu          104.0900       37.1600           91       136     2012      08        09        222              0.117375      22.214630       0.094686       0.181709       0.102500   -9999.000000       0.085500   -9999.000000
52797     52797     gansu          104.0900       37.1600           91       136     2012      08        10        223              0.112458      25.611053       3.003180       0.174496       0.093000   -9999.000000       0.130900       0.388000
52797     52797     gansu          104.0900       37.1600           91       136     2012      08        11        224              0.116708      25.273926       3.166167       0.175920       0.125000   -9999.000000       0.099400   -9999.000000
52797     52797     gansu          104.0900       37.1600           91       136     2012      08        12        225              0.146917      22.396759       4.384949       0.218121       0.135000       0.128800       0.109600       0.499000
52797     52797     gansu          104.0900       37.1600           91       136     2012      08        13        226              0.200292      19.390930       0.728895       0.228825       0.123000   -9999.000000       0.077300       0.651000
52797     52797     gansu          104.0900       37.1600           91       136     2012      08        14        227              0.194500      22.026520       0.000000       0.216573       0.107500       0.167900   -9999.000000       0.392000
52797     52797     gansu          104.0900       37.1600           91       136     2012      08        15        228              0.184042      22.327209       0.000000       0.203673       0.102500       0.074100       0.079700       0.350000
52797     52797     gansu          104.0900       37.1600           91       136     2012      08        16        229              0.169167      24.740845       3.967739       0.188827       0.094000   -9999.000000       0.152100   -9999.000000
52797     52797     gansu          104.0900       37.1600           91       136     2012      08        17        230              0.162875      21.158386       1.491546       0.198602       0.147000   -9999.000000       0.079700       0.694000
52797     52797     gansu          104.0900       37.1600           91       136     2012      08        18        231              0.159542      19.552002       0.071200       0.220952       0.107000   -9999.000000       0.076500       0.439000
52797     52797     gansu          104.0900       37.1600           91       136     2012      08        19        232              0.155542      20.276123       0.000000       0.208486       0.100000   -9999.000000       0.069600       0.387000
52797     52797     gansu          104.0900       37.1600           91       136     2012      08        20        233              0.138458      22.353577       0.432378       0.191065       0.101000       0.028600       0.102800       0.361000
52797     52797     gansu          104.0900       37.1600           91       136     2012      08        21        234              0.135500      20.232727       0.000000       0.181535       0.102000   -9999.000000       0.100000   -9999.000000
52797     52797     gansu          104.0900       37.1600           91       136     2012      08        22        235              0.127167      21.409973       1.891621       0.172920       0.096000   -9999.000000       0.111400   -9999.000000
52797     52797     gansu          104.0900       37.1600           91       136     2012      08        23        236              0.124208      21.155273       0.000000       0.182487       0.102000       0.037900       0.088800       0.446000
52797     52797     gansu          104.0900       37.1600           91       136     2012      08        24        237              0.118042      23.193207       3.002671       0.174758   -9999.000000   -9999.000000       0.106400   -9999.000000
52797     52797     gansu          104.0900       37.1600           91       136     2012      08        25        238              0.000000      22.447723       0.834765       0.188396       0.108500   -9999.000000   -9999.000000       0.283000
52797     52797     gansu          104.0900       37.1600           91       136     2012      08        26        239              0.099625      20.574371       0.630004       0.190458       0.096000   -9999.000000       0.101300   -9999.000000
52797     52797     gansu          104.0900       37.1600           91       136     2012      08        27        240              0.092917      22.414246       0.768401       0.175794       0.089000   -9999.000000       0.104900       0.441000
52797     52797     gansu          104.0900       37.1600           91       136     2012      08        28        241              0.087750      22.008057       0.000000       0.168999       0.098000   -9999.000000       0.114000       0.351000
52797     52797     gansu          104.0900       37.1600           91       136     2012      08        29        242              0.088583      23.476105       0.000000       0.159284       0.098000   -9999.000000       0.099900       0.367000
52797     52797     gansu          104.0900       37.1600           91       136     2012      08        30        243              0.081833      24.577087       5.638809       0.152111       0.121500   -9999.000000       0.121400       0.798000
52797     52797     gansu          104.0900       37.1600           91       136     2012      08        31        244              0.130417      22.227325      23.944162       0.186734       0.101000   -9999.000000   -9999.000000   -9999.000000
52797     52797     gansu          104.0900       37.1600           91       136     2012      09        01        245              0.239458      18.202148       6.748932       0.251013       0.170000   -9999.000000       0.189600       1.000000
52797     52797     gansu          104.0900       37.1600           91       136     2012      09        02        246              0.231958      12.462280       0.000000       0.285862       0.147000   -9999.000000       0.173100       0.599000
52797     52797     gansu          104.0900       37.1600           91       136     2012      09        03        247              0.223958      16.505859       0.000000       0.254543       0.137000       0.253000       0.089000       0.661000
52797     52797     gansu          104.0900       37.1600           91       136     2012      09        04        248              0.215458      17.553802       0.000000       0.239626       0.108500       0.104300       0.087000       0.333000
52797     52797     gansu          104.0900       37.1600           91       136     2012      09        05        249              0.210542      18.021393       1.206821       0.229743       0.109500       0.270700       0.089800   -9999.000000
52797     52797     gansu          104.0900       37.1600           91       136     2012      09        06        250              0.207250      18.975494       0.000000       0.227995       0.096000   -9999.000000       0.104600       0.421000
52797     52797     gansu          104.0900       37.1600           91       136     2012      09        07        251              0.200542      21.016479       0.389581       0.217327       0.113000   -9999.000000       0.096700   -9999.000000
52797     52797     gansu          104.0900       37.1600           91       136     2012      09        08        252              0.199333      18.415680       0.000000       0.216428       0.104000   -9999.000000       0.100400       0.392000
52797     52797     gansu          104.0900       37.1600           91       136     2012      09        09        253              0.194458      20.800842       0.410629       0.207465       0.108000   -9999.000000       0.084500   -9999.000000
52797     52797     gansu          104.0900       37.1600           91       136     2012      09        10        254              0.208167      19.379517      20.503756       0.205534       0.107000   -9999.000000       0.084900       0.451000
52797     52797     gansu          104.0900       37.1600           91       136     2012      09        11        255              0.242958      18.272583       2.292125       0.259258       0.162000   -9999.000000   -9999.000000       0.923000
52797     52797     gansu          104.0900       37.1600           91       136     2012      09        12        256              0.226542      12.645691       0.431629       0.272405       0.131000       0.109300       0.112000       0.640000
52797     52797     gansu          104.0900       37.1600           91       136     2012      09        13        257              0.216458      11.381805       0.000000       0.253715       0.122000   -9999.000000       0.106400       0.455000
52797     52797     gansu          104.0900       37.1600           91       136     2012      09        14        258              0.211042      13.676971       0.000000       0.241698       0.113000       0.172800       0.076300   -9999.000000
52797     52797     gansu          104.0900       37.1600           91       136     2012      09        15        259              0.207250      15.895905       0.497965       0.232986       0.104500       0.052900       0.078700       0.404000
52797     52797     gansu          104.0900       37.1600           91       136     2012      09        16        260              0.207500      16.331970       0.479764       0.227194       0.111000   -9999.000000       0.082900       0.599000
52797     52797     gansu          104.0900       37.1600           91       136     2012      09        17        261              0.208042      16.762634       0.000000       0.224210       0.101000   -9999.000000   -9999.000000       0.446000
52797     52797     gansu          104.0900       37.1600           91       136     2012      09        18        262              0.200417      16.939270       0.000000       0.217635       0.100000   -9999.000000       0.090000       0.377000
52797     52797     gansu          104.0900       37.1600           91       136     2012      09        19        263              0.196500      16.819092       0.377565       0.211553       0.097000   -9999.000000       0.097300   -9999.000000
52797     52797     gansu          104.0900       37.1600           91       136     2012      09        20        264              0.186208      17.926300       0.766557       0.205730       0.113000       0.028900       0.093100       0.465000
52797     52797     gansu          104.0900       37.1600           91       136     2012      09        21        265              0.186458      13.168488       0.000000       0.212460   -9999.000000   -9999.000000       0.085400       0.480000
52797     52797     gansu          104.0900       37.1600           91       136     2012      09        22        266              0.185333      16.745972       0.000000       0.204523       0.080000   -9999.000000   -9999.000000       0.426000
52797     52797     gansu          104.0900       37.1600           91       136     2012      09        23        267              0.187042      17.052429      12.306483       0.200161       0.078000   -9999.000000       0.158900       0.789000
52797     52797     gansu          104.0900       37.1600           91       136     2012      09        24        268              0.212917      16.987701       6.462845       0.229279   -9999.000000   -9999.000000       0.157900   -9999.000000
52797     52797     gansu          104.0900       37.1600           91       136     2012      09        25        269              0.240174      12.795868       2.854449       0.271235   -9999.000000   -9999.000000       0.147200       0.863000
52797     52797     gansu          104.0900       37.1600           91       136     2012      09        26        270              0.230333      14.202850       0.388239       0.253846       0.106500   -9999.000000       0.092600       0.543000
52797     52797     gansu          104.0900       37.1600           91       136     2012      09        27        271              0.219286      15.177643       0.000000       0.239750       0.106000   -9999.000000       0.091400       0.476000
52797     52797     gansu          104.0900       37.1600           91       136     2012      09        28        272              0.199267      11.779846       0.000000       0.230891       0.089000   -9999.000000   -9999.000000       0.381000
52797     52797     gansu          104.0900       37.1600           91       136     2012      09        29        273              0.195375      12.156891       0.000000       0.225437       0.095000   -9999.000000       0.096600   -9999.000000
52797     52797     gansu          104.0900       37.1600           91       136     2012      09        30        274              0.195250      12.686432       0.000000       0.220630       0.097000   -9999.000000       0.103000       0.428000
52797     52797     gansu          104.0900       37.1600           91       136     2012      10        01        275              0.194375      13.912720       0.857800       0.216932       0.089000   -9999.000000       0.077200       0.771000
52797     52797     gansu          104.0900       37.1600           91       136     2012      10        02        276              0.187042      15.283234       0.879276       0.217680       0.097000   -9999.000000       0.085900       0.468000
52797     52797     gansu          104.0900       37.1600           91       136     2012      10        03        277              0.185042      13.072723       1.693951       0.214957       0.087000       0.059000       0.082800       0.658000
52797     52797     gansu          104.0900       37.1600           91       136     2012      10        04        278              0.179583      13.292328       1.577530       0.218028       0.120000   -9999.000000   -9999.000000   -9999.000000
52797     52797     gansu          104.0900       37.1600           91       136     2012      10        05        279              0.172875      11.208588       0.000000       0.216009       0.100000   -9999.000000       0.090000       0.437000
52797     52797     gansu          104.0900       37.1600           91       136     2012      10        06        280              0.174958      12.316711       0.000000       0.211169       0.096000   -9999.000000       0.095000   -9999.000000
52797     52797     gansu          104.0900       37.1600           91       136     2012      10        07        281              0.177042      13.389465       0.060791       0.207509       0.095500   -9999.000000       0.077600       0.426000
52797     52797     gansu          104.0900       37.1600           91       136     2012      10        08        282              0.164208      14.822601       0.741705       0.204082   -9999.000000   -9999.000000       0.080900   -9999.000000
52797     52797     gansu          104.0900       37.1600           91       136     2012      10        09        283              0.154750       9.655304       0.000000       0.208794       0.092000   -9999.000000   -9999.000000       0.357000
52797     52797     gansu          104.0900       37.1600           91       136     2012      10        10        284              0.150250      10.840393       0.316103       0.203900       0.097000   -9999.000000       0.078100       0.417000
52797     52797     gansu          104.0900       37.1600           91       136     2012      10        11        285              0.146458      11.290436       0.000000       0.201969       0.085000   -9999.000000       0.072000       0.367000
52797     52797     gansu          104.0900       37.1600           91       136     2012      10        12        286              0.141875      10.887360       0.000000       0.198457       0.085000   -9999.000000       0.082100       0.370000
52797     52797     gansu          104.0900       37.1600           91       136     2012      10        13        287              0.140833      10.378479       0.000000       0.195595       0.084000   -9999.000000       0.071200   -9999.000000
52797     52797     gansu          104.0900       37.1600           91       136     2012      10        14        288              0.140208      11.564331       0.294616       0.192207       0.086000   -9999.000000       0.074100       0.392000
52797     52797     gansu          104.0900       37.1600           91       136     2012      10        15        289              0.136250      11.883484       1.371540       0.191296       0.077000   -9999.000000   -9999.000000       0.470000
52797     52797     gansu          104.0900       37.1600           91       136     2012      10        16        290              0.119500       8.898468       0.268242       0.196029   -9999.000000   -9999.000000       0.080100       0.396000
52797     52797     gansu          104.0900       37.1600           91       136     2012      10        17        291              0.117125       6.707123       0.000000       0.202288   -9999.000000   -9999.000000       0.085300       0.336000
52797     52797     gansu          104.0900       37.1600           91       136     2012      10        18        292              0.123208       9.320648       0.137270       0.196689       0.090000       0.106000       0.070300   -9999.000000
52797     52797     gansu          104.0900       37.1600           91       136     2012      10        19        293              0.125417      10.061066       0.000000       0.195249       0.082000   -9999.000000       0.074800       0.377000
52797     52797     gansu          104.0900       37.1600           91       136     2012      10        20        294              0.128125      11.447571       0.203436       0.191534       0.083000   -9999.000000       0.078500       0.469000
52797     52797     gansu          104.0900       37.1600           91       136     2012      10        21        295              0.102083      11.147827       0.480337       0.187618   -9999.000000   -9999.000000       0.086000       0.488000
52797     52797     gansu          104.0900       37.1600           91       136     2012      10        22        296              0.104083       4.326385       0.399745       0.183073   -9999.000000   -9999.000000       0.076300       0.403000
52797     52797     gansu          104.0900       37.1600           91       136     2012      10        23        297              0.101542       7.592224       0.309735       0.189460   -9999.000000   -9999.000000       0.081600   -9999.000000
52797     52797     gansu          104.0900       37.1600           91       136     2012      10        24        298              0.097500       6.898102       0.000000       0.186997   -9999.000000   -9999.000000       0.069700       0.403000
52797     52797     gansu          104.0900       37.1600           91       136     2012      10        25        299              0.000000       7.378754       0.135548       0.186134       0.087000   -9999.000000       0.071800       0.420000
52797     52797     gansu          104.0900       37.1600           91       136     2012      10        26        300              0.096667       7.668549       0.000000       0.184983       0.081000   -9999.000000   -9999.000000       0.302000
52797     52797     gansu          104.0900       37.1600           91       136     2012      10        27        301              0.093042       8.669006       0.000000       0.182562   -9999.000000   -9999.000000       0.078100       0.366000
52797     52797     gansu          104.0900       37.1600           91       136     2012      10        28        302              0.000000       8.270477       0.366869       0.180515       0.093000   -9999.000000       0.071900   -9999.000000
52797     52797     gansu          104.0900       37.1600           91       136     2012      10        29        303              0.082792       8.114197       0.000000       0.183213       0.083000   -9999.000000       0.073100       0.281000
52797     52797     gansu          104.0900       37.1600           91       136     2012      10        30        304              0.072083       5.788940       5.124556       0.177522       0.082000   -9999.000000       0.065000       0.368000
52797     52797     gansu          104.0900       37.1600           91       136     2012      10        31        305              0.068667       5.418335       0.130732       0.175378       0.081000       0.186400       0.066600       0.273000
52797     52797     gansu          104.0900       37.1600           91       136     2012      11        01        306              0.067125       6.129120       2.334006       0.184945   -9999.000000   -9999.000000   -9999.000000       0.303000
52797     52797     gansu          104.0900       37.1600           91       136     2012      11        02        307              0.057833       6.253387       1.756752       0.182332   -9999.000000   -9999.000000       0.064500   -9999.000000
52797     52797     gansu          104.0900       37.1600           91       136     2012      11        03        308              0.037917       2.045929       0.557201       0.143636   -9999.000000       0.105800       0.077500       0.361000
52797     52797     gansu          104.0900       37.1600           91       136     2012      11        04        309              0.043542      -0.901062       0.000000       0.122309       0.097000   -9999.000000       0.072600   -9999.000000
52797     52797     gansu          104.0900       37.1600           91       136     2012      11        05        310              0.055958       1.958466       0.000000       0.150494       0.092000       0.062400       0.075000       0.318000
52797     52797     gansu          104.0900       37.1600           91       136     2012      11        06        311              0.057625       4.016785       1.166687       0.167050   -9999.000000   -9999.000000   -9999.000000   -9999.000000
52797     52797     gansu          104.0900       37.1600           91       136     2012      11        07        312              0.059458       3.086578       0.085604       0.162004   -9999.000000   -9999.000000       0.079900       0.361000
52797     52797     gansu          104.0900       37.1600           91       136     2012      11        08        313              0.060542       3.144897       0.000000       0.163925       0.094000       0.011700       0.063800       0.353000
52797     52797     gansu          104.0900       37.1600           91       136     2012      11        09        314              0.055208       4.667267       0.057779       0.170929       0.090000   -9999.000000       0.062500       0.255000
52797     52797     gansu          104.0900       37.1600           91       136     2012      11        10        315              0.034917       1.266144       0.339684       0.142504   -9999.000000       0.029400       0.064800       0.271000
52797     52797     gansu          104.0900       37.1600           91       136     2012      11        11        316              0.037000      -1.742737       0.000000       0.115359   -9999.000000   -9999.000000       0.069200   -9999.000000
52797     52797     gansu          104.0900       37.1600           91       136     2012      11        12        317              0.043333       0.653503       0.327685       0.136275   -9999.000000       0.153800   -9999.000000       0.354000
52797     52797     gansu          104.0900       37.1600           91       136     2012      11        13        318              0.000000       1.427795       0.000000       0.143656   -9999.000000       0.033400       0.068400       0.369000
52797     52797     gansu          104.0900       37.1600           91       136     2012      11        14        319              0.059417       3.394867       0.000000       0.159514       0.094000   -9999.000000       0.070800       0.327000
52797     52797     gansu          104.0900       37.1600           91       136     2012      11        15        320              0.051458       3.352539       0.000000       0.157327   -9999.000000   -9999.000000       0.062400       0.322000
52797     52797     gansu          104.0900       37.1600           91       136     2012      11        16        321              0.047174       0.155090       0.000000       0.133771       0.083000   -9999.000000       0.067000   -9999.000000
52797     52797     gansu          104.0900       37.1600           91       136     2012      11        17        322              0.000000       2.387329       0.000000       0.153641   -9999.000000       0.093000       0.069100       0.421000
52797     52797     gansu          104.0900       37.1600           91       136     2012      11        18        323              0.042792       3.653259       0.030794       0.161204   -9999.000000   -9999.000000   -9999.000000       0.328000
52797     52797     gansu          104.0900       37.1600           91       136     2012      11        19        324              0.042917       2.559845       0.127675       0.153718       0.089000   -9999.000000       0.068300       0.286000
52797     52797     gansu          104.0900       37.1600           91       136     2012      11        20        325              0.039583       2.056824       0.034838       0.149095       0.091000   -9999.000000       0.075100       0.238000
52797     52797     gansu          104.0900       37.1600           91       136     2012      11        21        326              0.042042       1.419464       0.000000       0.145999   -9999.000000       0.123900       0.062500   -9999.000000
52797     52797     gansu          104.0900       37.1600           91       136     2012      11        22        327              0.027625       0.522797       0.000000       0.136741   -9999.000000       0.029600       0.064600       0.342000
52797     52797     gansu          104.0900       37.1600           91       136     2012      11        23        328              0.012400      -3.281433       0.000000       0.101397   -9999.000000   -9999.000000   -9999.000000       0.325000
52797     52797     gansu          104.0900       37.1600           91       136     2012      11        24        329              0.000000      -1.783539       0.120334       0.115533   -9999.000000   -9999.000000       0.063900       0.242000
52797     52797     gansu          104.0900       37.1600           91       136     2012      11        25        330              0.000000      -2.228088       0.000000       0.112497   -9999.000000       0.090800       0.060400       0.056000
52797     52797     gansu          104.0900       37.1600           91       136     2012      11        26        331              0.000000      -4.461975       0.309210       0.097737   -9999.000000   -9999.000000       0.045000   -9999.000000
52797     52797     gansu          104.0900       37.1600           91       136     2012      11        27        332              0.000000      -2.059570       0.186176       0.112296   -9999.000000   -9999.000000       0.061700       0.266000
52797     52797     gansu          104.0900       37.1600           91       136     2012      11        28        333              0.000000      -3.019318       0.505417       0.109422   -9999.000000   -9999.000000       0.060700       0.237000
52797     52797     gansu          104.0900       37.1600           91       136     2012      11        29        334              0.000000      -2.450989       0.000000       0.111383   -9999.000000   -9999.000000   -9999.000000       0.204000
52797     52797     gansu          104.0900       37.1600           91       136     2012      11        30        335              0.000000      -1.571259       0.636670       0.117085   -9999.000000   -9999.000000       0.065900       0.212000
52797     52797     gansu          104.0900       37.1600           91       136     2012      12        01        336              0.000000      -2.909943       0.328164       0.105367   -9999.000000   -9999.000000       0.074100   -9999.000000
52797     52797     gansu          104.0900       37.1600           91       136     2012      12        02        337              0.000000      -2.474762       0.000000       0.111469   -9999.000000   -9999.000000       0.060500       0.229000
52797     52797     gansu          104.0900       37.1600           91       136     2012      12        03        338              0.000000      -5.426208       0.000000       0.092530   -9999.000000   -9999.000000       0.063400   -9999.000000
52797     52797     gansu          104.0900       37.1600           91       136     2012      12        04        339              0.000000      -2.229462       0.000000       0.112758   -9999.000000   -9999.000000       0.061900       0.218000
52797     52797     gansu          104.0900       37.1600           91       136     2012      12        05        340              0.000000      -4.553131       0.220336       0.096887   -9999.000000       0.033200       0.071400   -9999.000000
52797     52797     gansu          104.0900       37.1600           91       136     2012      12        06        341              0.000000      -1.670227       0.000000       0.115792   -9999.000000   -9999.000000       0.065700       0.192000
52797     52797     gansu          104.0900       37.1600           91       136     2012      12        07        342              0.000000      -3.105591       0.862208       0.105940   -9999.000000       0.056900       0.073300       0.261000
52797     52797     gansu          104.0900       37.1600           91       136     2012      12        08        343              0.000000      -3.597900       1.654925       0.105790   -9999.000000   -9999.000000       0.066100       0.165000
52797     52797     gansu          104.0900       37.1600           91       136     2012      12        09        344              0.000000      -2.848053       0.240652       0.113508   -9999.000000   -9999.000000       0.061300       0.013000
52797     52797     gansu          104.0900       37.1600           91       136     2012      12        10        345              0.000000      -1.867432       0.098564       0.116232   -9999.000000       0.104300   -9999.000000   -9999.000000
52797     52797     gansu          104.0900       37.1600           91       136     2012      12        11        346              0.000000      -1.354553       0.101637       0.121441       0.081000   -9999.000000       0.067300       0.183000
52797     52797     gansu          104.0900       37.1600           91       136     2012      12        12        347              0.000000      -0.893219       0.412214       0.125223   -9999.000000   -9999.000000       0.063700       0.333000
52797     52797     gansu          104.0900       37.1600           91       136     2012      12        13        348              0.000000      -0.991119       0.517299       0.124839   -9999.000000       0.124400       0.075500       0.163000
52797     52797     gansu          104.0900       37.1600           91       136     2012      12        14        349              0.000000      -1.042389       0.421052       0.123834   -9999.000000   -9999.000000       0.061100       0.254000
52797     52797     gansu          104.0900       37.1600           91       136     2012      12        15        350              0.000000      -0.096008       0.000000       0.136200   -9999.000000       0.110100       0.062200   -9999.000000
52797     52797     gansu          104.0900       37.1600           91       136     2012      12        16        351              0.000000      -1.756104       0.000000       0.120237   -9999.000000   -9999.000000   -9999.000000       0.292000
52797     52797     gansu          104.0900       37.1600           91       136     2012      12        17        352              0.000000      -4.180634       0.000000       0.099888   -9999.000000   -9999.000000       0.066600       0.299000
52797     52797     gansu          104.0900       37.1600           91       136     2012      12        18        353              0.000000      -4.594147       0.000000       0.090213   -9999.000000       0.019700       0.076200       0.145000
52797     52797     gansu          104.0900       37.1600           91       136     2012      12        19        354              0.000000      -1.974945       0.745297       0.114699   -9999.000000   -9999.000000       0.061600       0.164000
52797     52797     gansu          104.0900       37.1600           91       136     2012      12        20        355              0.000000      -4.123383       0.000000       0.102486   -9999.000000   -9999.000000       0.062500   -9999.000000
52797     52797     gansu          104.0900       37.1600           91       136     2012      12        21        356              0.000000      -7.214661       0.453632       0.084659   -9999.000000   -9999.000000       0.067100       0.141000
52797     52797     gansu          104.0900       37.1600           91       136     2012      12        22        357              0.000000      -8.743683       0.000000       0.081890   -9999.000000   -9999.000000       0.063400       0.211000
52797     52797     gansu          104.0900       37.1600           91       136     2012      12        23        358              0.000000     -12.048462       0.000000       0.078620   -9999.000000   -9999.000000       0.054600       0.134000
52797     52797     gansu          104.0900       37.1600           91       136     2012      12        24        359              0.000000      -6.917694       0.000000       0.081265   -9999.000000   -9999.000000       0.071200       0.088000
52797     52797     gansu          104.0900       37.1600           91       136     2012      12        25        360              0.000000      -6.487396       0.000000       0.088186   -9999.000000   -9999.000000       0.068100   -9999.000000
52797     52797     gansu          104.0900       37.1600           91       136     2012      12        26        361              0.000000      -5.889404       0.000000       0.086280   -9999.000000   -9999.000000       0.061900       0.275000
52797     52797     gansu          104.0900       37.1600           91       136     2012      12        27        362              0.000000      -3.943970       0.000000       0.099546   -9999.000000   -9999.000000   -9999.000000       0.193000
52797     52797     gansu          104.0900       37.1600           91       136     2012      12        28        363              0.000000      -6.146271       0.000000       0.091133   -9999.000000   -9999.000000       0.058300       0.125000
52797     52797     gansu          104.0900       37.1600           91       136     2012      12        29        364              0.000000     -12.431976       0.000000       0.079254   -9999.000000   -9999.000000       0.072700       0.155000
52797     52797     gansu          104.0900       37.1600           91       136     2012      12        30        365              0.000000     -11.716766       0.000000       0.076696   -9999.000000   -9999.000000       0.050900   -9999.000000
52797     52797     gansu          104.0900       37.1600           91       136     2012      12        31        366              0.000000      -9.488861       0.000000       0.077380   -9999.000000   -9999.000000       0.057500       0.102000
