# Supplementary material for: Research on Fusing Multisatellite Soil Moisture Data Based on Bayesian Model Averaging
Source: Hindawi journal article supplement (doi:10.1155/2018/9310838), 2018-06-25
Supplement: f1 [file 9310838.f1.zip › 2012_sm00-10cm_daily_ZDB_ZHY_53289_366days_allin.txt]

53289     53289     neimenggu      113.8300       42.2408           71       175     2012      01        01        001              0.000000   -9999.000000       0.000000   -9999.000000   -9999.000000   -9999.000000       0.057500   -9999.000000
53289     53289     neimenggu      113.8300       42.2408           71       175     2012      01        02        002              0.000000     -12.934326       0.000000       0.101456   -9999.000000   -9999.000000       0.051400       0.229000
53289     53289     neimenggu      113.8300       42.2408           71       175     2012      01        03        003              0.000000     -16.266113       0.000000       0.101537   -9999.000000   -9999.000000       0.051800       0.168000
53289     53289     neimenggu      113.8300       42.2408           71       175     2012      01        04        004              0.000000     -18.166962       0.000000       0.100863   -9999.000000   -9999.000000       0.056200   -9999.000000
53289     53289     neimenggu      113.8300       42.2408           71       175     2012      01        05        005              0.000000     -15.558380       0.000000       0.100916   -9999.000000   -9999.000000       0.058300       0.177000
53289     53289     neimenggu      113.8300       42.2408           71       175     2012      01        06        006              0.000000     -15.955811       0.000000       0.100925   -9999.000000   -9999.000000   -9999.000000       0.118000
53289     53289     neimenggu      113.8300       42.2408           71       175     2012      01        07        007              0.000000     -16.167450       0.000000       0.100566   -9999.000000   -9999.000000       0.051500       0.239000
53289     53289     neimenggu      113.8300       42.2408           71       175     2012      01        08        008              0.000000     -15.978790       0.000000       0.100645   -9999.000000   -9999.000000       0.054400       0.183000
53289     53289     neimenggu      113.8300       42.2408           71       175     2012      01        09        009              0.000000     -15.705658       0.000000       0.100819   -9999.000000   -9999.000000   -9999.000000   -9999.000000
53289     53289     neimenggu      113.8300       42.2408           71       175     2012      01        10        010              0.000000     -15.005676       0.000000       0.101072   -9999.000000   -9999.000000       0.051300       0.125000
53289     53289     neimenggu      113.8300       42.2408           71       175     2012      01        11        011              0.000000     -16.785095       0.000000       0.100705   -9999.000000   -9999.000000       0.055900       0.161000
53289     53289     neimenggu      113.8300       42.2408           71       175     2012      01        12        012              0.000000     -13.824921       0.000000       0.100813   -9999.000000   -9999.000000       0.048800       0.149000
53289     53289     neimenggu      113.8300       42.2408           71       175     2012      01        13        013              0.000000     -13.564636       0.000000       0.101360   -9999.000000   -9999.000000       0.049400       0.147000
53289     53289     neimenggu      113.8300       42.2408           71       175     2012      01        14        014              0.000000     -13.657379       0.000000       0.100996   -9999.000000   -9999.000000       0.050100       0.182000
53289     53289     neimenggu      113.8300       42.2408           71       175     2012      01        15        015              0.000000     -13.140747       0.000000       0.100889   -9999.000000   -9999.000000       0.053800       0.152000
53289     53289     neimenggu      113.8300       42.2408           71       175     2012      01        16        016              0.000000     -11.919434       0.000000       0.101099   -9999.000000   -9999.000000       0.052800       0.151000
53289     53289     neimenggu      113.8300       42.2408           71       175     2012      01        17        017              0.000000     -11.341400       0.000000       0.101286   -9999.000000   -9999.000000       0.054500   -9999.000000
53289     53289     neimenggu      113.8300       42.2408           71       175     2012      01        18        018              0.000000     -12.560608       0.000000       0.101213   -9999.000000   -9999.000000       0.048800       0.166000
53289     53289     neimenggu      113.8300       42.2408           71       175     2012      01        19        019              0.000000     -11.277924       0.000000       0.101107   -9999.000000   -9999.000000       0.050200       0.205000
53289     53289     neimenggu      113.8300       42.2408           71       175     2012      01        20        020              0.000000     -15.792603       0.000000       0.100181   -9999.000000   -9999.000000       0.049100   -9999.000000
53289     53289     neimenggu      113.8300       42.2408           71       175     2012      01        21        021              0.000000     -20.121704       0.000000       0.098801   -9999.000000   -9999.000000       0.055100       0.159000
53289     53289     neimenggu      113.8300       42.2408           71       175     2012      01        22        022              0.000000     -20.634888       0.000000       0.098495   -9999.000000   -9999.000000       0.057000       0.177000
53289     53289     neimenggu      113.8300       42.2408           71       175     2012      01        23        023              0.000000     -18.882721       0.000000       0.098961   -9999.000000   -9999.000000       0.047900       0.213000
53289     53289     neimenggu      113.8300       42.2408           71       175     2012      01        24        024              0.000000     -17.737274       0.000000       0.099173   -9999.000000   -9999.000000   -9999.000000       0.199000
53289     53289     neimenggu      113.8300       42.2408           71       175     2012      01        25        025              0.000000     -17.110657       0.000000       0.099219   -9999.000000   -9999.000000       0.050800       0.200000
53289     53289     neimenggu      113.8300       42.2408           71       175     2012      01        26        026              0.000000     -15.466827       0.000000       0.099574   -9999.000000   -9999.000000       0.056000       0.169000
53289     53289     neimenggu      113.8300       42.2408           71       175     2012      01        27        027              0.000000     -16.385468       0.000000       0.099119   -9999.000000   -9999.000000       0.055800       0.201000
53289     53289     neimenggu      113.8300       42.2408           71       175     2012      01        28        028              0.000000     -14.418274       0.000000       0.099035   -9999.000000   -9999.000000       0.058300   -9999.000000
53289     53289     neimenggu      113.8300       42.2408           71       175     2012      01        29        029              0.000000     -17.575378       0.000000       0.098777   -9999.000000   -9999.000000       0.046800       0.197000
53289     53289     neimenggu      113.8300       42.2408           71       175     2012      01        30        030              0.000000     -16.546326       0.000000       0.098356   -9999.000000   -9999.000000       0.052800       0.215000
53289     53289     neimenggu      113.8300       42.2408           71       175     2012      01        31        031              0.000000     -16.133179       0.000000       0.098559   -9999.000000   -9999.000000       0.050900       0.217000
53289     53289     neimenggu      113.8300       42.2408           71       175     2012      02        01        032              0.000000     -19.253571       0.000000       0.097968   -9999.000000   -9999.000000       0.060700       0.225000
53289     53289     neimenggu      113.8300       42.2408           71       175     2012      02        02        033              0.000000     -19.998688       0.000000       0.097752   -9999.000000   -9999.000000       0.059200   -9999.000000
53289     53289     neimenggu      113.8300       42.2408           71       175     2012      02        03        034              0.000000     -17.522568       0.000000       0.098068   -9999.000000   -9999.000000       0.058800       0.231000
53289     53289     neimenggu      113.8300       42.2408           71       175     2012      02        04        035              0.000000     -16.528351       0.000000       0.098503   -9999.000000   -9999.000000       0.053100       0.198000
53289     53289     neimenggu      113.8300       42.2408           71       175     2012      02        05        036              0.000000     -12.646851       0.000000       0.099085   -9999.000000   -9999.000000       0.052800       0.262000
53289     53289     neimenggu      113.8300       42.2408           71       175     2012      02        06        037              0.000000     -12.983887       0.000000       0.099122   -9999.000000   -9999.000000       0.048000       0.153000
53289     53289     neimenggu      113.8300       42.2408           71       175     2012      02        07        038              0.000000     -19.479721       0.000000       0.097779   -9999.000000   -9999.000000       0.056200   -9999.000000
53289     53289     neimenggu      113.8300       42.2408           71       175     2012      02        08        039              0.000000     -18.168152       0.000000       0.097841   -9999.000000   -9999.000000       0.057500       0.165000
53289     53289     neimenggu      113.8300       42.2408           71       175     2012      02        09        040              0.000000     -15.713745       0.000000       0.098470   -9999.000000   -9999.000000       0.052700       0.160000
53289     53289     neimenggu      113.8300       42.2408           71       175     2012      02        10        041              0.000000     -14.447876       0.000000       0.098566   -9999.000000   -9999.000000       0.050500       0.227000
53289     53289     neimenggu      113.8300       42.2408           71       175     2012      02        11        042              0.000000     -12.806030       0.000000       0.098460   -9999.000000   -9999.000000       0.051000       0.194000
53289     53289     neimenggu      113.8300       42.2408           71       175     2012      02        12        043              0.000000     -11.007477       0.000000       0.098789   -9999.000000   -9999.000000   -9999.000000       0.191000
53289     53289     neimenggu      113.8300       42.2408           71       175     2012      02        13        044              0.000000      -7.906586       0.000000       0.107732   -9999.000000   -9999.000000   -9999.000000       0.226000
53289     53289     neimenggu      113.8300       42.2408           71       175     2012      02        14        045              0.000000      -9.608521       0.000000       0.103511   -9999.000000   -9999.000000       0.064300       0.157000
53289     53289     neimenggu      113.8300       42.2408           71       175     2012      02        15        046              0.000000     -12.428558       0.000000       0.097493   -9999.000000   -9999.000000       0.057500   -9999.000000
53289     53289     neimenggu      113.8300       42.2408           71       175     2012      02        16        047              0.000000     -12.459290       0.000000       0.097544   -9999.000000   -9999.000000       0.061100       0.163000
53289     53289     neimenggu      113.8300       42.2408           71       175     2012      02        17        048              0.000000     -14.562866       0.000000       0.097079   -9999.000000   -9999.000000       0.060400       0.200000
53289     53289     neimenggu      113.8300       42.2408           71       175     2012      02        18        049              0.000000     -14.623322       0.000000       0.096921   -9999.000000   -9999.000000       0.065100   -9999.000000
53289     53289     neimenggu      113.8300       42.2408           71       175     2012      02        19        050              0.000000     -11.879211       0.000000       0.097418   -9999.000000   -9999.000000       0.066200       0.130000
53289     53289     neimenggu      113.8300       42.2408           71       175     2012      02        20        051              0.000000      -8.741302       0.000000       0.100320   -9999.000000   -9999.000000       0.071100       0.184000
53289     53289     neimenggu      113.8300       42.2408           71       175     2012      02        21        052              0.000000      -6.818176       0.000000       0.118832   -9999.000000   -9999.000000   -9999.000000       0.216000
53289     53289     neimenggu      113.8300       42.2408           71       175     2012      02        22        053              0.000000      -2.049469       0.000000       0.157978   -9999.000000   -9999.000000       0.066900       0.189000
53289     53289     neimenggu      113.8300       42.2408           71       175     2012      02        23        054              0.000000      -7.969269       0.000000       0.114831   -9999.000000   -9999.000000       0.054000       0.166000
53289     53289     neimenggu      113.8300       42.2408           71       175     2012      02        24        055              0.000000      -5.923645       0.000000       0.122342   -9999.000000   -9999.000000       0.058300       0.108000
53289     53289     neimenggu      113.8300       42.2408           71       175     2012      02        25        056              0.000000     -10.164734       0.000000       0.109774   -9999.000000   -9999.000000       0.067800       0.173000
53289     53289     neimenggu      113.8300       42.2408           71       175     2012      02        26        057              0.000000      -9.446533       0.000000       0.106805   -9999.000000   -9999.000000       0.065300   -9999.000000
53289     53289     neimenggu      113.8300       42.2408           71       175     2012      02        27        058              0.000000      -7.622742       0.000000       0.114552   -9999.000000   -9999.000000   -9999.000000       0.189000
53289     53289     neimenggu      113.8300       42.2408           71       175     2012      02        28        059              0.000000      -5.530762       0.000000       0.132497       0.080000   -9999.000000       0.076900       0.149000
53289     53289     neimenggu      113.8300       42.2408           71       175     2012      02        29        060              0.000000   -9999.000000       0.000000   -9999.000000       0.082000       0.010800   -9999.000000   -9999.000000
53289     53289     neimenggu      113.8300       42.2408           71       175     2012      03        01        061              0.000000      -2.159424       0.000000       0.160104   -9999.000000       0.121400       0.077600       0.184000
53289     53289     neimenggu      113.8300       42.2408           71       175     2012      03        02        062              0.000000      -6.282684       0.000000       0.126118       0.085000   -9999.000000       0.067500   -9999.000000
53289     53289     neimenggu      113.8300       42.2408           71       175     2012      03        03        063              0.000000      -4.310486       0.000000       0.136651   -9999.000000   -9999.000000       0.071800       0.114000
53289     53289     neimenggu      113.8300       42.2408           71       175     2012      03        04        064              0.000000      -2.494324       0.000000       0.141273   -9999.000000   -9999.000000       0.086300       0.190000
53289     53289     neimenggu      113.8300       42.2408           71       175     2012      03        05        065              0.000000      -0.750732       0.000000       0.173114   -9999.000000       0.048200       0.068000       0.220000
53289     53289     neimenggu      113.8300       42.2408           71       175     2012      03        06        066              0.000000      -7.294403       0.000000       0.120202   -9999.000000   -9999.000000       0.074900       0.176000
53289     53289     neimenggu      113.8300       42.2408           71       175     2012      03        07        067              0.000000      -6.797699       0.000000       0.113638   -9999.000000   -9999.000000       0.077100   -9999.000000
53289     53289     neimenggu      113.8300       42.2408           71       175     2012      03        08        068              0.000000     -10.492706       0.000000       0.109411   -9999.000000   -9999.000000   -9999.000000       0.168000
53289     53289     neimenggu      113.8300       42.2408           71       175     2012      03        09        069              0.000000      -9.145966       0.000000       0.106784   -9999.000000   -9999.000000       0.073800       0.188000
53289     53289     neimenggu      113.8300       42.2408           71       175     2012      03        10        070              0.000000      -6.306885       0.000000       0.128320   -9999.000000   -9999.000000       0.071100       0.195000
53289     53289     neimenggu      113.8300       42.2408           71       175     2012      03        11        071              0.000000     -11.808258       0.000000       0.108054   -9999.000000   -9999.000000       0.079800       0.154000
53289     53289     neimenggu      113.8300       42.2408           71       175     2012      03        12        072              0.000000      -8.848602       0.000000       0.106918   -9999.000000   -9999.000000       0.080300       0.177000
53289     53289     neimenggu      113.8300       42.2408           71       175     2012      03        13        073              0.000000      -4.735901       0.000000       0.129109   -9999.000000       0.195900       0.083300       0.190000
53289     53289     neimenggu      113.8300       42.2408           71       175     2012      03        14        074              0.000000      -3.675049       0.000000       0.146898   -9999.000000   -9999.000000   -9999.000000       0.153000
53289     53289     neimenggu      113.8300       42.2408           71       175     2012      03        15        075              0.000000       0.103119       0.000000       0.174491       0.093000   -9999.000000       0.096900   -9999.000000
53289     53289     neimenggu      113.8300       42.2408           71       175     2012      03        16        076              0.000000       2.544342       0.000000       0.214026       0.103000   -9999.000000       0.097900       0.168000
53289     53289     neimenggu      113.8300       42.2408           71       175     2012      03        17        077              0.000000       2.781433       0.000000       0.206775       0.100000       0.025300       0.086900       0.252000
53289     53289     neimenggu      113.8300       42.2408           71       175     2012      03        18        078              0.000000      -1.692017       0.000000       0.173252       0.098000       0.011100       0.087800   -9999.000000
53289     53289     neimenggu      113.8300       42.2408           71       175     2012      03        19        079              0.000000      -2.097473       0.000000       0.160038   -9999.000000   -9999.000000       0.090000       0.098000
53289     53289     neimenggu      113.8300       42.2408           71       175     2012      03        20        080              0.000000      -1.475128       0.000000       0.164238   -9999.000000       0.012600       0.085700       0.167000
53289     53289     neimenggu      113.8300       42.2408           71       175     2012      03        21        081              0.000000       1.572968       0.000000       0.191579       0.086000   -9999.000000       0.085000       0.134000
53289     53289     neimenggu      113.8300       42.2408           71       175     2012      03        22        082              0.000000       2.048309       0.641919       0.196640       0.085000   -9999.000000       0.099600       0.137000
53289     53289     neimenggu      113.8300       42.2408           71       175     2012      03        23        083              0.000000       2.185669       0.000000       0.204141       0.088000   -9999.000000       0.086600       0.155000
53289     53289     neimenggu      113.8300       42.2408           71       175     2012      03        24        084              0.000000      -0.401276       0.000000       0.175063   -9999.000000   -9999.000000   -9999.000000       0.090000
53289     53289     neimenggu      113.8300       42.2408           71       175     2012      03        25        085              0.000000       0.658539       0.000000       0.184978   -9999.000000       0.031900   -9999.000000       0.166000
53289     53289     neimenggu      113.8300       42.2408           71       175     2012      03        26        086              0.000000       3.051483       0.000000       0.202541       0.078000   -9999.000000       0.091400   -9999.000000
53289     53289     neimenggu      113.8300       42.2408           71       175     2012      03        27        087              0.000000       4.496826       0.000000       0.210181       0.086000   -9999.000000       0.088700       0.164000
53289     53289     neimenggu      113.8300       42.2408           71       175     2012      03        28        088              0.000000       5.211487       0.000000       0.214098       0.087000       0.055400       0.137300       0.546000
53289     53289     neimenggu      113.8300       42.2408           71       175     2012      03        29        089              0.000000       7.501038       0.000000       0.231769       0.083000   -9999.000000       0.098500       0.325000
53289     53289     neimenggu      113.8300       42.2408           71       175     2012      03        30        090              0.000000       1.855103       0.000000       0.190878   -9999.000000       0.047800       0.109700       0.121000
53289     53289     neimenggu      113.8300       42.2408           71       175     2012      03        31        091              0.000000      -0.780212       0.000000       0.168668       0.087000       0.138100       0.095000   -9999.000000
53289     53289     neimenggu      113.8300       42.2408           71       175     2012      04        01        092              0.000000       2.245239       0.000000       0.189112       0.089000   -9999.000000       0.093300       0.117000
53289     53289     neimenggu      113.8300       42.2408           71       175     2012      04        02        093              0.000000       4.130157       0.000000       0.212607       0.083000   -9999.000000       0.096200       0.071000
53289     53289     neimenggu      113.8300       42.2408           71       175     2012      04        03        094              0.000000       1.069611       0.000000       0.182192       0.088000   -9999.000000       0.109800       0.123000
53289     53289     neimenggu      113.8300       42.2408           71       175     2012      04        04        095              0.000000       3.243561       0.000000       0.203770   -9999.000000       0.076500       0.106000       0.107000
53289     53289     neimenggu      113.8300       42.2408           71       175     2012      04        05        096              0.000000       2.462769       0.000000       0.191586       0.084000   -9999.000000       0.108600   -9999.000000
53289     53289     neimenggu      113.8300       42.2408           71       175     2012      04        06        097              0.000000       3.097565       0.000000       0.200636       0.088000   -9999.000000       0.092900       0.069000
53289     53289     neimenggu      113.8300       42.2408           71       175     2012      04        07        098              0.000000       6.170227       0.000000       0.219763       0.078000   -9999.000000       0.095100       0.065000
53289     53289     neimenggu      113.8300       42.2408           71       175     2012      04        08        099              0.000000       7.371216       0.000000       0.207835       0.082000   -9999.000000       0.094400       0.088000
53289     53289     neimenggu      113.8300       42.2408           71       175     2012      04        09        100              0.000000       7.917328       0.000000       0.217740       0.079000   -9999.000000       0.102800       0.102000
53289     53289     neimenggu      113.8300       42.2408           71       175     2012      04        10        101              0.000000      12.656586       0.000000       0.212363   -9999.000000   -9999.000000       0.114000       0.035000
53289     53289     neimenggu      113.8300       42.2408           71       175     2012      04        11        102              0.000000       6.560211       0.144496       0.197086       0.074000   -9999.000000   -9999.000000       0.073000
53289     53289     neimenggu      113.8300       42.2408           71       175     2012      04        12        103              0.000000       5.091370       0.000000       0.203147       0.083000   -9999.000000       0.096900       0.118000
53289     53289     neimenggu      113.8300       42.2408           71       175     2012      04        13        104              0.000000       8.488037       0.000000       0.209773       0.079500   -9999.000000       0.091900   -9999.000000
53289     53289     neimenggu      113.8300       42.2408           71       175     2012      04        14        105              0.000000      11.652893       0.000000       0.204351   -9999.000000   -9999.000000       0.111600       0.086000
53289     53289     neimenggu      113.8300       42.2408           71       175     2012      04        15        106              0.000000      11.744537       0.000000       0.197628   -9999.000000       0.027400       0.104700       0.052000
53289     53289     neimenggu      113.8300       42.2408           71       175     2012      04        16        107              0.000000       6.181824       0.000000       0.188075       0.075500   -9999.000000       0.110200       0.060000
53289     53289     neimenggu      113.8300       42.2408           71       175     2012      04        17        108              0.000000      10.308990       0.000000       0.195829       0.080000   -9999.000000       0.092900       0.085000
53289     53289     neimenggu      113.8300       42.2408           71       175     2012      04        18        109              0.000000      14.053619       0.887014       0.188741       0.085000       0.027700   -9999.000000       0.131000
53289     53289     neimenggu      113.8300       42.2408           71       175     2012      04        19        110              0.000000      13.457397       0.000000       0.197438       0.081000       0.147500       0.094700       0.056000
53289     53289     neimenggu      113.8300       42.2408           71       175     2012      04        20        111              0.000000      10.031097       0.000000       0.192743       0.076000   -9999.000000       0.111200       0.004000
53289     53289     neimenggu      113.8300       42.2408           71       175     2012      04        21        112              0.000000      11.183960       0.000000       0.189081       0.075000   -9999.000000       0.105200       0.074000
53289     53289     neimenggu      113.8300       42.2408           71       175     2012      04        22        113              0.000000      13.361908       0.000000       0.185000       0.082000       0.089700       0.107600       0.096000
53289     53289     neimenggu      113.8300       42.2408           71       175     2012      04        23        114              0.000000      18.055481       3.967676       0.177130       0.074000       0.057300       0.153200       0.539000
53289     53289     neimenggu      113.8300       42.2408           71       175     2012      04        24        115              0.000000      13.275818       0.049787       0.215056       0.102000       0.121000       0.103500   -9999.000000
53289     53289     neimenggu      113.8300       42.2408           71       175     2012      04        25        116              0.000000       7.422455       0.000000       0.215879   -9999.000000       0.073400       0.098100       0.046000
53289     53289     neimenggu      113.8300       42.2408           71       175     2012      04        26        117              0.000000       7.087860       0.746387       0.209915       0.084000       0.136400       0.114000       0.037000
53289     53289     neimenggu      113.8300       42.2408           71       175     2012      04        27        118              0.000000      11.036560       0.000000       0.207496       0.091000   -9999.000000   -9999.000000       0.052000
53289     53289     neimenggu      113.8300       42.2408           71       175     2012      04        28        119              0.000000       4.715302       0.000000       0.193825       0.086000       0.014300   -9999.000000       0.090000
53289     53289     neimenggu      113.8300       42.2408           71       175     2012      04        29        120              0.000000      10.480438       0.000000       0.201342       0.085000   -9999.000000       0.104700   -9999.000000
53289     53289     neimenggu      113.8300       42.2408           71       175     2012      04        30        121              0.000000      15.937866       8.863575       0.190916       0.076000   -9999.000000       0.111700       0.012000
53289     53289     neimenggu      113.8300       42.2408           71       175     2012      05        01        122              0.000000      11.072418       0.784459       0.261366       0.107000   -9999.000000       0.117800       0.233000
53289     53289     neimenggu      113.8300       42.2408           71       175     2012      05        02        123              0.000000      13.910034       0.000000       0.248001       0.074500   -9999.000000       0.110400       0.098000
53289     53289     neimenggu      113.8300       42.2408           71       175     2012      05        03        124              0.000000      14.773376       0.000000       0.231739       0.079000   -9999.000000       0.108700       0.120000
53289     53289     neimenggu      113.8300       42.2408           71       175     2012      05        04        125              0.000000      17.827759       0.000000       0.218557       0.077000   -9999.000000       0.093500   -9999.000000
53289     53289     neimenggu      113.8300       42.2408           71       175     2012      05        05        126              0.000000      17.807892       0.000000       0.206224       0.072000   -9999.000000       0.096500       0.068000
53289     53289     neimenggu      113.8300       42.2408           71       175     2012      05        06        127              0.000000      18.372925       0.000000       0.196820       0.068000   -9999.000000       0.094700       0.088000
53289     53289     neimenggu      113.8300       42.2408           71       175     2012      05        07        128              0.000000      20.311859       0.000000       0.187434   -9999.000000   -9999.000000       0.102100       0.130000
53289     53289     neimenggu      113.8300       42.2408           71       175     2012      05        08        129              0.000000      19.430511       0.000000       0.179437       0.079000   -9999.000000       0.101900       0.124000
53289     53289     neimenggu      113.8300       42.2408           71       175     2012      05        09        130              0.000000      19.387146       0.150416       0.173037       0.082000   -9999.000000       0.115500       0.117000
53289     53289     neimenggu      113.8300       42.2408           71       175     2012      05        10        131              0.000000      20.070465       8.206737       0.171391       0.079000       0.026000       0.095600       0.065000
53289     53289     neimenggu      113.8300       42.2408           71       175     2012      05        11        132              0.000000      21.934143       0.479265       0.199963       0.165000       0.145700       0.127400       0.086000
53289     53289     neimenggu      113.8300       42.2408           71       175     2012      05        12        133              0.000000      15.346161       0.543630       0.250103       0.088000       0.086500       0.101700   -9999.000000
53289     53289     neimenggu      113.8300       42.2408           71       175     2012      05        13        134              0.000000      11.843018       0.000000       0.230750       0.084000       0.076800       0.118100       0.037000
53289     53289     neimenggu      113.8300       42.2408           71       175     2012      05        14        135              0.000000       8.772827       0.000000       0.224267       0.079000   -9999.000000       0.123900       0.012000
53289     53289     neimenggu      113.8300       42.2408           71       175     2012      05        15        136              0.000000       9.294983       0.000000       0.217306       0.080000   -9999.000000       0.108500   -9999.000000
53289     53289     neimenggu      113.8300       42.2408           71       175     2012      05        16        137              0.000000      10.743408       0.000000       0.212243       0.084000       0.016100       0.103300       0.002000
53289     53289     neimenggu      113.8300       42.2408           71       175     2012      05        17        138              0.000000      13.794495       0.000000       0.205577       0.078000       0.174500       0.096900       0.098000
53289     53289     neimenggu      113.8300       42.2408           71       175     2012      05        18        139              0.000000      19.161194       0.000000       0.192591       0.078000   -9999.000000       0.107800       0.068000
53289     53289     neimenggu      113.8300       42.2408           71       175     2012      05        19        140              0.000000      20.242096       0.549503       0.180716       0.084000   -9999.000000       0.112000       0.081000
53289     53289     neimenggu      113.8300       42.2408           71       175     2012      05        20        141              0.000000      19.545898       0.000000       0.176645       0.085000   -9999.000000       0.111700       0.071000
53289     53289     neimenggu      113.8300       42.2408           71       175     2012      05        21        142              0.000000      23.869843       1.466399       0.169236       0.150000       0.051800       0.148400       0.376000
53289     53289     neimenggu      113.8300       42.2408           71       175     2012      05        22        143              0.000000      18.327728       0.000000       0.182480       0.080000   -9999.000000       0.099700       0.039000
53289     53289     neimenggu      113.8300       42.2408           71       175     2012      05        23        144              0.000000      13.727875       0.000000       0.185983   -9999.000000       0.043500       0.092900   -9999.000000
53289     53289     neimenggu      113.8300       42.2408           71       175     2012      05        24        145              0.000000      15.185150       0.000000       0.177451       0.083000       0.024200       0.111600       0.060000
53289     53289     neimenggu      113.8300       42.2408           71       175     2012      05        25        146              0.000000      15.133636       0.000000       0.171642       0.085000   -9999.000000       0.111500       0.066000
53289     53289     neimenggu      113.8300       42.2408           71       175     2012      05        26        147              0.000000      18.207367       0.000000       0.166153       0.077000   -9999.000000       0.108500       0.144000
53289     53289     neimenggu      113.8300       42.2408           71       175     2012      05        27        148              0.000000      20.474274       0.000000       0.160213       0.068000   -9999.000000       0.098500       0.112000
53289     53289     neimenggu      113.8300       42.2408           71       175     2012      05        28        149              0.000000      22.830994       8.247920       0.155174       0.075500       0.040500       0.094000   -9999.000000
53289     53289     neimenggu      113.8300       42.2408           71       175     2012      05        29        150              0.000000      22.465454       8.179047       0.170870       0.143000   -9999.000000       0.237400       0.450000
53289     53289     neimenggu      113.8300       42.2408           71       175     2012      05        30        151              0.000000      12.671661       0.000000       0.287050       0.078000   -9999.000000       0.114600   -9999.000000
53289     53289     neimenggu      113.8300       42.2408           71       175     2012      05        31        152              0.000000      15.583313       6.510356       0.254112       0.140000       0.121000   -9999.000000   -9999.000000
53289     53289     neimenggu      113.8300       42.2408           71       175     2012      06        01        153              0.000000      13.363312       0.000000       0.280279       0.111000   -9999.000000       0.125900       0.134000
53289     53289     neimenggu      113.8300       42.2408           71       175     2012      06        02        154              0.000000      12.601105       0.406295       0.263092       0.098000       0.234300       0.109300   -9999.000000
53289     53289     neimenggu      113.8300       42.2408           71       175     2012      06        03        155              0.000000      17.055878       0.568274       0.249956       0.086000       0.041300       0.104900       0.096000
53289     53289     neimenggu      113.8300       42.2408           71       175     2012      06        04        156              0.000000      18.148041       0.000000       0.238442       0.081000       0.202300       0.120800       0.088000
53289     53289     neimenggu      113.8300       42.2408           71       175     2012      06        05        157              0.000000      19.366730       0.458401       0.226272       0.082500       0.015700       0.122900       0.170000
53289     53289     neimenggu      113.8300       42.2408           71       175     2012      06        06        158              0.000000      21.251312       0.720226       0.216537       0.084000   -9999.000000       0.123300       0.122000
53289     53289     neimenggu      113.8300       42.2408           71       175     2012      06        07        159              0.000000      19.080475       0.000000       0.218694       0.084000   -9999.000000       0.108700       0.120000
53289     53289     neimenggu      113.8300       42.2408           71       175     2012      06        08        160              0.000000      19.207733       1.990657       0.208349       0.103000   -9999.000000       0.129300       0.107000
53289     53289     neimenggu      113.8300       42.2408           71       175     2012      06        09        161              0.000000      20.037109       0.000000       0.206156       0.099000   -9999.000000       0.109300       0.084000
53289     53289     neimenggu      113.8300       42.2408           71       175     2012      06        10        162              0.000000      14.354431       0.000000       0.206665       0.082500       0.049700       0.115400   -9999.000000
53289     53289     neimenggu      113.8300       42.2408           71       175     2012      06        11        163              0.000000      15.916168       0.191068       0.198715       0.091000       0.070700       0.112800       0.131000
53289     53289     neimenggu      113.8300       42.2408           71       175     2012      06        12        164              0.000000      16.855743       6.123435       0.192652       0.105000   -9999.000000   -9999.000000       0.073000
53289     53289     neimenggu      113.8300       42.2408           71       175     2012      06        13        165              0.000000      16.956390      17.495945       0.205875       0.200500       0.275200       0.247800   -9999.000000
53289     53289     neimenggu      113.8300       42.2408           71       175     2012      06        14        166              0.000000      12.113007       2.715852       0.318432       0.189000       0.521100       0.217100       0.513000
53289     53289     neimenggu      113.8300       42.2408           71       175     2012      06        15        167              0.000000      12.755585       0.000000       0.299078       0.112000       0.185000       0.130400       0.198000
53289     53289     neimenggu      113.8300       42.2408           71       175     2012      06        16        168              0.000000      17.587555       1.488067       0.278244       0.092500       0.144000       0.110300       0.179000
53289     53289     neimenggu      113.8300       42.2408           71       175     2012      06        17        169              0.000000      20.110992       0.000000       0.268611       0.084000   -9999.000000       0.112600       0.185000
53289     53289     neimenggu      113.8300       42.2408           71       175     2012      06        18        170              0.000000      22.391083       0.000000       0.254412       0.081500   -9999.000000       0.101900       0.200000
53289     53289     neimenggu      113.8300       42.2408           71       175     2012      06        19        171              0.000000      24.073914       0.400849       0.240668       0.068000   -9999.000000       0.132800       0.210000
53289     53289     neimenggu      113.8300       42.2408           71       175     2012      06        20        172              0.000000      22.655182       0.000000       0.236454       0.105000       0.083000       0.130500       0.242000
53289     53289     neimenggu      113.8300       42.2408           71       175     2012      06        21        173              0.000000      20.928528       0.135503       0.233097       0.095000   -9999.000000       0.116400   -9999.000000
53289     53289     neimenggu      113.8300       42.2408           71       175     2012      06        22        174              0.000000      22.648224       0.147564       0.223627       0.084000   -9999.000000       0.110600       0.198000
53289     53289     neimenggu      113.8300       42.2408           71       175     2012      06        23        175              0.000000      24.877747       3.360676       0.212045       0.120000       0.074500       0.204700       0.356000
53289     53289     neimenggu      113.8300       42.2408           71       175     2012      06        24        176              0.000000      24.285156       0.429516       0.228038       0.116500   -9999.000000       0.181600       0.417000
53289     53289     neimenggu      113.8300       42.2408           71       175     2012      06        25        177              0.000000      21.872162       0.000000       0.231805       0.091000   -9999.000000       0.117600       0.259000
53289     53289     neimenggu      113.8300       42.2408           71       175     2012      06        26        178              0.000000      23.925873       1.305047       0.216703       0.130500   -9999.000000       0.113600   -9999.000000
53289     53289     neimenggu      113.8300       42.2408           71       175     2012      06        27        179              0.000000      20.878967       0.235546       0.219648       0.125000   -9999.000000       0.195900       0.478000
53289     53289     neimenggu      113.8300       42.2408           71       175     2012      06        28        180              0.000000      21.141479       0.621168       0.223934   -9999.000000       0.104300       0.210700       0.306000
53289     53289     neimenggu      113.8300       42.2408           71       175     2012      06        29        181              0.000000      19.849304       0.000000       0.229657       0.100000       0.258600   -9999.000000       0.298000
53289     53289     neimenggu      113.8300       42.2408           71       175     2012      06        30        182              0.000000      21.798035       0.000000       0.216576       0.096000       0.102500       0.107000   -9999.000000
53289     53289     neimenggu      113.8300       42.2408           71       175     2012      07        01        183              0.000000      25.191467       0.000000       0.199504       0.092000       0.049500       0.102900   -9999.000000
53289     53289     neimenggu      113.8300       42.2408           71       175     2012      07        02        184              0.000000      22.133942       0.000000       0.188498       0.085000       0.136600       0.120400       0.181000
53289     53289     neimenggu      113.8300       42.2408           71       175     2012      07        03        185              0.000000      22.571960       0.000000       0.183696       0.080000       0.012500       0.118200       0.195000
53289     53289     neimenggu      113.8300       42.2408           71       175     2012      07        04        186              0.000000      24.592102      14.997718       0.177424       0.090000       0.207900       0.227600   -9999.000000
53289     53289     neimenggu      113.8300       42.2408           71       175     2012      07        05        187              0.000000      25.209534       0.367497       0.209361       0.127000   -9999.000000       0.130000       0.323000
53289     53289     neimenggu      113.8300       42.2408           71       175     2012      07        06        188              0.000000      22.823090       0.000000       0.277329   -9999.000000       0.170500       0.107600       0.275000
53289     53289     neimenggu      113.8300       42.2408           71       175     2012      07        07        189              0.000000      25.134796       2.480728       0.249384   -9999.000000   -9999.000000       0.141000       0.214000
53289     53289     neimenggu      113.8300       42.2408           71       175     2012      07        08        190              0.000000      22.731659       0.174697       0.254443       0.096000       0.186100       0.127100       0.265000
53289     53289     neimenggu      113.8300       42.2408           71       175     2012      07        09        191              0.000000      24.460968       0.000000       0.239658       0.087500       0.101000       0.112000   -9999.000000
53289     53289     neimenggu      113.8300       42.2408           71       175     2012      07        10        192              0.000000      25.119080       0.964339       0.225177       0.099000       0.106800       0.122200       0.547000
53289     53289     neimenggu      113.8300       42.2408           71       175     2012      07        11        193              0.000000      24.572510       0.390818       0.220200       0.091000       0.031800       0.127100       0.212000
53289     53289     neimenggu      113.8300       42.2408           71       175     2012      07        12        194              0.000000      22.946716       1.877071       0.217488       0.118000   -9999.000000       0.116900       0.414000
53289     53289     neimenggu      113.8300       42.2408           71       175     2012      07        13        195              0.000000      21.560760       4.799167       0.230805       0.124000   -9999.000000       0.108100       0.625000
53289     53289     neimenggu      113.8300       42.2408           71       175     2012      07        14        196              0.000000      21.755127       0.928639       0.255250       0.105000       0.100600       0.123800       0.392000
53289     53289     neimenggu      113.8300       42.2408           71       175     2012      07        15        197              0.000000      22.564453       0.000000       0.244452       0.081000       0.109100       0.113300       0.215000
53289     53289     neimenggu      113.8300       42.2408           71       175     2012      07        16        198              0.000000      24.768372       0.000000       0.223765       0.087000       0.123400   -9999.000000       0.218000
53289     53289     neimenggu      113.8300       42.2408           71       175     2012      07        17        199              0.000000      25.431946       0.000000       0.206658       0.092000   -9999.000000       0.102500       0.189000
53289     53289     neimenggu      113.8300       42.2408           71       175     2012      07        18        200              0.000000      26.147247       0.230350       0.193136       0.092500   -9999.000000       0.105000       0.252000
53289     53289     neimenggu      113.8300       42.2408           71       175     2012      07        19        201              0.000000      24.993835       0.632732       0.191710       0.127000       0.087300       0.152300       0.400000
53289     53289     neimenggu      113.8300       42.2408           71       175     2012      07        20        202              0.048688      25.114166      13.951411       0.195105       0.104500   -9999.000000       0.174400   -9999.000000
53289     53289     neimenggu      113.8300       42.2408           71       175     2012      07        21        203              0.176917      24.896942       4.994586       0.242727       0.235000   -9999.000000       0.207500       0.893000
53289     53289     neimenggu      113.8300       42.2408           71       175     2012      07        22        204              0.191792      18.689484       0.000000       0.299822       0.130000       0.257700       0.124100       0.382000
53289     53289     neimenggu      113.8300       42.2408           71       175     2012      07        23        205              0.183583      21.514526       0.000000       0.265453       0.107500       0.250100       0.106400       0.312000
53289     53289     neimenggu      113.8300       42.2408           71       175     2012      07        24        206              0.178708      23.696960       1.511888       0.246872       0.116000       0.071200       0.098800       0.343000
53289     53289     neimenggu      113.8300       42.2408           71       175     2012      07        25        207              0.211625      25.571136      25.429949       0.237887       0.223000   -9999.000000       0.235300   -9999.000000
53289     53289     neimenggu      113.8300       42.2408           71       175     2012      07        26        208              0.200667      21.873169       0.000000       0.334001       0.161500       0.226200       0.168100       0.737000
53289     53289     neimenggu      113.8300       42.2408           71       175     2012      07        27        209              0.197750      21.396118      45.243633       0.296225       0.107000       0.262400       0.243700       0.494000
53289     53289     neimenggu      113.8300       42.2408           71       175     2012      07        28        210              0.213292      24.190308       0.860801       0.338535       0.206500       0.518100       0.184600       0.803000
53289     53289     neimenggu      113.8300       42.2408           71       175     2012      07        29        211              0.203792      21.643677       0.000000       0.343566       0.141000       0.267400       0.147200       0.537000
53289     53289     neimenggu      113.8300       42.2408           71       175     2012      07        30        212              0.195792      21.218140       0.177244       0.320381       0.152000       0.544500       0.151000   -9999.000000
53289     53289     neimenggu      113.8300       42.2408           71       175     2012      07        31        213              0.189750      20.673462       1.960119       0.310398       0.127000   -9999.000000       0.151300       0.521000
53289     53289     neimenggu      113.8300       42.2408           71       175     2012      08        01        214              0.187667      20.384155       3.257590       0.303904       0.124000       0.154600       0.150200       0.437000
53289     53289     neimenggu      113.8300       42.2408           71       175     2012      08        02        215              0.187500      21.084412       2.790706       0.306233       0.123000   -9999.000000       0.109900       0.356000
53289     53289     neimenggu      113.8300       42.2408           71       175     2012      08        03        216              0.177792      23.179810       0.742624       0.302371       0.127000       0.203400       0.110800       0.555000
53289     53289     neimenggu      113.8300       42.2408           71       175     2012      08        04        217              0.166125      23.927582       0.181951       0.294000       0.124000   -9999.000000       0.111900       0.333000
53289     53289     neimenggu      113.8300       42.2408           71       175     2012      08        05        218              0.146500      25.098267       0.000000       0.284565       0.116000   -9999.000000       0.112000       0.446000
53289     53289     neimenggu      113.8300       42.2408           71       175     2012      08        06        219              0.122458      24.933075       0.141062       0.275335       0.120000       0.073800       0.133200       0.378000
53289     53289     neimenggu      113.8300       42.2408           71       175     2012      08        07        220              0.102708      25.213470       1.502512       0.267057       0.120000   -9999.000000   -9999.000000   -9999.000000
53289     53289     neimenggu      113.8300       42.2408           71       175     2012      08        08        221              0.094833      23.558167       0.080447       0.271957       0.114000       0.023400       0.113700       0.278000
53289     53289     neimenggu      113.8300       42.2408           71       175     2012      08        09        222              0.090375      22.943359       0.000000       0.262325       0.113000       0.024400       0.112700       0.302000
53289     53289     neimenggu      113.8300       42.2408           71       175     2012      08        10        223              0.083542      23.031250       4.524003       0.253338       0.103000   -9999.000000       0.117600   -9999.000000
53289     53289     neimenggu      113.8300       42.2408           71       175     2012      08        11        224              0.075208      23.048126       0.061611       0.266135       0.104500   -9999.000000       0.133300       0.343000
53289     53289     neimenggu      113.8300       42.2408           71       175     2012      08        12        225              0.071042      19.598969       0.000000       0.271014       0.106000   -9999.000000       0.130200       0.358000
53289     53289     neimenggu      113.8300       42.2408           71       175     2012      08        13        226              0.069087      20.045746       0.438953       0.260269       0.108000       0.078400       0.141100       0.247000
53289     53289     neimenggu      113.8300       42.2408           71       175     2012      08        14        227              0.126250      21.251923      13.364424       0.252476       0.190000       0.018500       0.209900       0.858000
53289     53289     neimenggu      113.8300       42.2408           71       175     2012      08        15        228              0.159500      17.989716       0.083510       0.313649       0.131000       0.325700       0.139100       0.308000
53289     53289     neimenggu      113.8300       42.2408           71       175     2012      08        16        229              0.158917      20.531158       0.360597       0.285300       0.108500       0.147700       0.152200       0.341000
53289     53289     neimenggu      113.8300       42.2408           71       175     2012      08        17        230              0.152958      22.359802       1.672130       0.274050       0.114000   -9999.000000       0.171600       0.560000
53289     53289     neimenggu      113.8300       42.2408           71       175     2012      08        18        231              0.144625      21.767975       0.000000       0.275557       0.119000   -9999.000000       0.149400   -9999.000000
53289     53289     neimenggu      113.8300       42.2408           71       175     2012      08        19        232              0.142708      19.669586       2.172687       0.268158       0.111000       0.104200       0.123100       0.357000
53289     53289     neimenggu      113.8300       42.2408           71       175     2012      08        20        233              0.128042      21.784149       0.053428       0.264562       0.114000       0.072900       0.128600       0.232000
53289     53289     neimenggu      113.8300       42.2408           71       175     2012      08        21        234              0.116125      15.155121       0.000000       0.265041       0.129000       0.099400       0.126100       0.367000
53289     53289     neimenggu      113.8300       42.2408           71       175     2012      08        22        235              0.111167      14.465637       0.000000       0.256986       0.117500       0.197700       0.134900   -9999.000000
53289     53289     neimenggu      113.8300       42.2408           71       175     2012      08        23        236              0.106208      18.037872       0.000000       0.249302       0.121000   -9999.000000       0.146800   -9999.000000
53289     53289     neimenggu      113.8300       42.2408           71       175     2012      08        24        237              0.097000      20.764496       0.000000       0.240012       0.127000       0.125300       0.147800       0.326000
53289     53289     neimenggu      113.8300       42.2408           71       175     2012      08        25        238              0.000000      21.652496       0.530079       0.232921       0.132000       0.287400       0.159100       0.388000
53289     53289     neimenggu      113.8300       42.2408           71       175     2012      08        26        239              0.083583      21.736053       0.000000       0.234551       0.137000       0.099100       0.128900       0.347000
53289     53289     neimenggu      113.8300       42.2408           71       175     2012      08        27        240              0.076917      22.775574       1.210293       0.230533       0.133000       0.532400       0.135700       0.442000
53289     53289     neimenggu      113.8300       42.2408           71       175     2012      08        28        241              0.075292      21.532501       0.000000       0.236586       0.114000       0.468700       0.135800   -9999.000000
53289     53289     neimenggu      113.8300       42.2408           71       175     2012      08        29        242              0.073250      21.317596       0.000000       0.225943       0.116000       0.081900       0.136700       0.281000
53289     53289     neimenggu      113.8300       42.2408           71       175     2012      08        30        243              0.069625      22.067871       0.202378       0.217667       0.116500   -9999.000000   -9999.000000       0.243000
53289     53289     neimenggu      113.8300       42.2408           71       175     2012      08        31        244              0.062833      23.709290       0.000000       0.210010       0.110000       0.033600       0.123200       0.275000
53289     53289     neimenggu      113.8300       42.2408           71       175     2012      09        01        245              0.101958      21.431793      34.463028       0.208443       0.224000       0.098600       0.171900       0.847000
53289     53289     neimenggu      113.8300       42.2408           71       175     2012      09        02        246              0.189458      14.894897       0.336800       0.315676       0.225000   -9999.000000       0.216500       0.783000
53289     53289     neimenggu      113.8300       42.2408           71       175     2012      09        03        247              0.176583      12.291046       0.117428       0.317739       0.160000       0.223200       0.177900       0.602000
53289     53289     neimenggu      113.8300       42.2408           71       175     2012      09        04        248              0.172333      11.558228       0.000000       0.299640       0.141500       0.448200       0.157900       0.348000
53289     53289     neimenggu      113.8300       42.2408           71       175     2012      09        05        249              0.171000      13.893372       0.000000       0.289164       0.134000   -9999.000000       0.124900   -9999.000000
53289     53289     neimenggu      113.8300       42.2408           71       175     2012      09        06        250              0.167917      16.268585       0.000000       0.280738       0.130000       0.100500       0.120600       0.252000
53289     53289     neimenggu      113.8300       42.2408           71       175     2012      09        07        251              0.165125      17.655457       0.000000       0.274016       0.112500   -9999.000000       0.120300       0.260000
53289     53289     neimenggu      113.8300       42.2408           71       175     2012      09        08        252              0.161750      18.105560       0.000000       0.268533       0.113000       0.029000       0.136600   -9999.000000
53289     53289     neimenggu      113.8300       42.2408           71       175     2012      09        09        253              0.157167      18.880493       0.000000       0.263380       0.115000   -9999.000000       0.132900       0.313000
53289     53289     neimenggu      113.8300       42.2408           71       175     2012      09        10        254              0.148750      19.444336       0.516732       0.257265       0.119000   -9999.000000       0.158300       0.413000
53289     53289     neimenggu      113.8300       42.2408           71       175     2012      09        11        255              0.142917      17.660126       3.856362       0.256157       0.188000       0.086100       0.126700       0.512000
53289     53289     neimenggu      113.8300       42.2408           71       175     2012      09        12        256              0.152042      13.028442       0.755724       0.274313       0.120000   -9999.000000       0.128700       0.536000
53289     53289     neimenggu      113.8300       42.2408           71       175     2012      09        13        257              0.182042      11.690704       2.323600       0.272714       0.132000       0.116300       0.136700       0.479000
53289     53289     neimenggu      113.8300       42.2408           71       175     2012      09        14        258              0.171333      10.944031       0.058171       0.282455       0.105000       0.112200       0.131500       0.290000
53289     53289     neimenggu      113.8300       42.2408           71       175     2012      09        15        259              0.167458      12.951355       0.000000       0.270915       0.118000       0.091200       0.136900       0.319000
53289     53289     neimenggu      113.8300       42.2408           71       175     2012      09        16        260              0.164042      14.262756       0.000000       0.264529       0.117000       0.065700   -9999.000000   -9999.000000
53289     53289     neimenggu      113.8300       42.2408           71       175     2012      09        17        261              0.159083      14.975189       0.000000       0.259157       0.117000       0.165300       0.115100       0.304000
53289     53289     neimenggu      113.8300       42.2408           71       175     2012      09        18        262              0.154542      14.908844       0.000000       0.255138       0.107500       0.091600       0.113900       0.201000
53289     53289     neimenggu      113.8300       42.2408           71       175     2012      09        19        263              0.150667      14.892517       0.000000       0.251412       0.112000       0.028900       0.130400       0.338000
53289     53289     neimenggu      113.8300       42.2408           71       175     2012      09        20        264              0.146333      15.412109       0.696344       0.247912       0.119000       0.239200       0.138800       0.320000
53289     53289     neimenggu      113.8300       42.2408           71       175     2012      09        21        265              0.138875      16.442444       0.584932       0.247853   -9999.000000       0.032400       0.139300   -9999.000000
53289     53289     neimenggu      113.8300       42.2408           71       175     2012      09        22        266              0.138333      14.329895       0.061672       0.255534       0.109000   -9999.000000       0.114900       0.339000
53289     53289     neimenggu      113.8300       42.2408           71       175     2012      09        23        267              0.135208      16.558563       0.000000       0.248867       0.104500   -9999.000000       0.118800       0.220000
53289     53289     neimenggu      113.8300       42.2408           71       175     2012      09        24        268              0.134083      16.923889      15.327364       0.243120       0.110000       0.110000       0.125500       0.260000
53289     53289     neimenggu      113.8300       42.2408           71       175     2012      09        25        269              0.165125      15.726959       0.233517       0.272919       0.180000       0.179100       0.188900       0.469000
53289     53289     neimenggu      113.8300       42.2408           71       175     2012      09        26        270              0.155708      12.375549       5.908981       0.299669       0.147500       0.152400       0.182700   -9999.000000
53289     53289     neimenggu      113.8300       42.2408           71       175     2012      09        27        271              0.150571      12.495880       1.022668       0.301091   -9999.000000       0.150900       0.172500       0.374000
53289     53289     neimenggu      113.8300       42.2408           71       175     2012      09        28        272              0.141600       7.692169       0.356640       0.297085       0.111000   -9999.000000       0.137200       0.214000
53289     53289     neimenggu      113.8300       42.2408           71       175     2012      09        29        273              0.141208       8.033325       0.081596       0.286510       0.113000   -9999.000000       0.127700       0.233000
53289     53289     neimenggu      113.8300       42.2408           71       175     2012      09        30        274              0.140000       9.195435       0.000000       0.280026       0.107000   -9999.000000       0.119600       0.226000
53289     53289     neimenggu      113.8300       42.2408           71       175     2012      10        01        275              0.137750      11.343140       0.000000       0.275075       0.106000   -9999.000000       0.128100       0.192000
53289     53289     neimenggu      113.8300       42.2408           71       175     2012      10        02        276              0.130917      12.951935       0.000000       0.270204       0.107000       0.128800       0.130800       0.257000
53289     53289     neimenggu      113.8300       42.2408           71       175     2012      10        03        277              0.122500      10.804016       0.000000       0.265918       0.104000       0.073000       0.114800       0.180000
53289     53289     neimenggu      113.8300       42.2408           71       175     2012      10        04        278              0.118500       9.449158       0.000000       0.263707       0.103500       0.090500       0.112800   -9999.000000
53289     53289     neimenggu      113.8300       42.2408           71       175     2012      10        05        279              0.112792      11.046967       0.000000       0.261486       0.106000       0.059900       0.111700       0.142000
53289     53289     neimenggu      113.8300       42.2408           71       175     2012      10        06        280              0.107208      10.215027       0.000000       0.259005       0.113000       0.116200       0.131100       0.195000
53289     53289     neimenggu      113.8300       42.2408           71       175     2012      10        07        281              0.102625      11.164246       0.000000       0.256947       0.107000       0.090100       0.136400   -9999.000000
53289     53289     neimenggu      113.8300       42.2408           71       175     2012      10        08        282              0.098667      12.513580       2.412673       0.254680       0.144000   -9999.000000       0.174500       0.579000
53289     53289     neimenggu      113.8300       42.2408           71       175     2012      10        09        283              0.085542      12.844025       0.000000       0.263846       0.118000       0.131600       0.131200       0.313000
53289     53289     neimenggu      113.8300       42.2408           71       175     2012      10        10        284              0.083292       5.126343       0.000000       0.265763       0.112000       0.135000       0.118900       0.148000
53289     53289     neimenggu      113.8300       42.2408           71       175     2012      10        11        285              0.083708       7.394135       0.000000       0.261784       0.099000       0.198900       0.117200       0.154000
53289     53289     neimenggu      113.8300       42.2408           71       175     2012      10        12        286              0.079500       9.240540       0.000000       0.257523       0.101000       0.024000       0.132600       0.096000
53289     53289     neimenggu      113.8300       42.2408           71       175     2012      10        13        287              0.071667       6.479095       0.000000       0.243157   -9999.000000   -9999.000000       0.135400       0.111000
53289     53289     neimenggu      113.8300       42.2408           71       175     2012      10        14        288              0.072500       2.925812       0.000000       0.223370       0.100000       0.012700       0.135900       0.192000
53289     53289     neimenggu      113.8300       42.2408           71       175     2012      10        15        289              0.075042       4.809387       6.639625       0.246381       0.103000   -9999.000000       0.117400   -9999.000000
53289     53289     neimenggu      113.8300       42.2408           71       175     2012      10        16        290              0.067000       8.882782       0.000000       0.267495   -9999.000000   -9999.000000       0.145900       0.525000
53289     53289     neimenggu      113.8300       42.2408           71       175     2012      10        17        291              0.066042       1.616028       0.000000       0.237502       0.123000       0.105200       0.130100       0.165000
53289     53289     neimenggu      113.8300       42.2408           71       175     2012      10        18        292              0.068125       2.770386       0.161686       0.245718   -9999.000000   -9999.000000       0.118600       0.244000
53289     53289     neimenggu      113.8300       42.2408           71       175     2012      10        19        293              0.071417       4.348206       0.000000       0.261146   -9999.000000       0.105400       0.128000       0.197000
53289     53289     neimenggu      113.8300       42.2408           71       175     2012      10        20        294              0.071667       6.065521       0.000000       0.260827       0.101000   -9999.000000       0.112000   -9999.000000
53289     53289     neimenggu      113.8300       42.2408           71       175     2012      10        21        295              0.077042       5.418335      10.689202       0.262122   -9999.000000   -9999.000000       0.203000       0.609000
53289     53289     neimenggu      113.8300       42.2408           71       175     2012      10        22        296              0.085958       3.071564       0.000000       0.302708   -9999.000000   -9999.000000       0.143100       0.389000
53289     53289     neimenggu      113.8300       42.2408           71       175     2012      10        23        297              0.088958       4.139618       0.000000       0.289013   -9999.000000   -9999.000000       0.122300       0.314000
53289     53289     neimenggu      113.8300       42.2408           71       175     2012      10        24        298              0.092042       5.913635       0.000000       0.282873   -9999.000000       0.105900       0.123700       0.186000
53289     53289     neimenggu      113.8300       42.2408           71       175     2012      10        25        299              0.000000       6.215149       0.000000       0.278223       0.101500       0.083100       0.119100   -9999.000000
53289     53289     neimenggu      113.8300       42.2408           71       175     2012      10        26        300              0.094333       7.269409       4.230610       0.275411       0.100500       0.180100       0.105500       0.173000
53289     53289     neimenggu      113.8300       42.2408           71       175     2012      10        27        301              0.089833       6.272034       0.368363       0.292341       0.098000       0.073300       0.110000       0.129000
53289     53289     neimenggu      113.8300       42.2408           71       175     2012      10        28        302              0.000000       2.995941       0.000000       0.246454       0.105000       0.197800       0.106200       0.167000
53289     53289     neimenggu      113.8300       42.2408           71       175     2012      10        29        303              0.081542       3.748444       0.000000       0.263198   -9999.000000   -9999.000000       0.112400       0.104000
53289     53289     neimenggu      113.8300       42.2408           71       175     2012      10        30        304              0.073750       0.447968       0.000000       0.208764   -9999.000000       0.074300       0.112600       0.081000
53289     53289     neimenggu      113.8300       42.2408           71       175     2012      10        31        305              0.073125      -0.309357       0.000000       0.186990       0.096000   -9999.000000   -9999.000000       0.124000
53289     53289     neimenggu      113.8300       42.2408           71       175     2012      11        01        306              0.079833       0.238251       0.000000       0.191974       0.099000       0.050300       0.103100       0.157000
53289     53289     neimenggu      113.8300       42.2408           71       175     2012      11        02        307              0.088792       1.497375       0.000000       0.230704       0.099000       0.120900       0.098100   -9999.000000
53289     53289     neimenggu      113.8300       42.2408           71       175     2012      11        03        308              0.084417       4.537201       3.444264       0.258229   -9999.000000   -9999.000000       0.096500       0.151000
53289     53289     neimenggu      113.8300       42.2408           71       175     2012      11        04        309              0.083000      -0.430511       0.000000       0.188712   -9999.000000   -9999.000000       0.094200       0.109000
53289     53289     neimenggu      113.8300       42.2408           71       175     2012      11        05        310              0.084083      -2.434448       0.000000       0.144841   -9999.000000       0.156700       0.077900       0.180000
53289     53289     neimenggu      113.8300       42.2408           71       175     2012      11        06        311              0.085250      -3.147919       0.000000       0.135880       0.099000   -9999.000000       0.076300       0.182000
53289     53289     neimenggu      113.8300       42.2408           71       175     2012      11        07        312              0.084417      -1.005463       0.000000       0.162805   -9999.000000   -9999.000000       0.076200       0.186000
53289     53289     neimenggu      113.8300       42.2408           71       175     2012      11        08        313              0.082167      -1.971039       0.000000       0.149994   -9999.000000   -9999.000000   -9999.000000       0.302000
53289     53289     neimenggu      113.8300       42.2408           71       175     2012      11        09        314              0.083750      -0.108185       0.000000       0.180230   -9999.000000   -9999.000000       0.074800       0.258000
53289     53289     neimenggu      113.8300       42.2408           71       175     2012      11        10        315              0.086875       0.528900       0.000000       0.201021   -9999.000000   -9999.000000       0.069100       0.361000
53289     53289     neimenggu      113.8300       42.2408           71       175     2012      11        11        316              0.089500      -4.803925       0.000000       0.129695   -9999.000000   -9999.000000       0.069600       0.179000
53289     53289     neimenggu      113.8300       42.2408           71       175     2012      11        12        317              0.091000      -7.978699       0.000000       0.116689   -9999.000000       0.226500       0.061100       0.249000
53289     53289     neimenggu      113.8300       42.2408           71       175     2012      11        13        318              0.000000      -8.573212       0.000000       0.113031   -9999.000000       0.154500       0.060900   -9999.000000
53289     53289     neimenggu      113.8300       42.2408           71       175     2012      11        14        319              0.088125     -10.737579       0.000000       0.110251   -9999.000000       0.061900       0.061500       0.231000
53289     53289     neimenggu      113.8300       42.2408           71       175     2012      11        15        320              0.092500      -6.285980       0.000000       0.110498   -9999.000000   -9999.000000       0.057800       0.216000
53289     53289     neimenggu      113.8300       42.2408           71       175     2012      11        16        321              0.097667      -4.362823       0.000000       0.120751   -9999.000000   -9999.000000       0.060000       0.274000
53289     53289     neimenggu      113.8300       42.2408           71       175     2012      11        17        322              0.000000      -6.942108       0.000000       0.115120   -9999.000000       0.024600   -9999.000000       0.290000
53289     53289     neimenggu      113.8300       42.2408           71       175     2012      11        18        323              0.098000      -5.136139       0.000000       0.113085   -9999.000000   -9999.000000       0.067400   -9999.000000
53289     53289     neimenggu      113.8300       42.2408           71       175     2012      11        19        324              0.096000      -6.798615       0.000000       0.113078   -9999.000000       0.044600       0.061100       0.231000
53289     53289     neimenggu      113.8300       42.2408           71       175     2012      11        20        325              0.092083      -6.754913       0.000000       0.112084   -9999.000000   -9999.000000       0.061000       0.203000
53289     53289     neimenggu      113.8300       42.2408           71       175     2012      11        21        326              0.089125      -5.023987       0.000000       0.115271   -9999.000000   -9999.000000       0.055100       0.288000
53289     53289     neimenggu      113.8300       42.2408           71       175     2012      11        22        327              0.087417      -5.535583       0.000000       0.115612   -9999.000000   -9999.000000       0.052600       0.225000
53289     53289     neimenggu      113.8300       42.2408           71       175     2012      11        23        328              0.083750     -10.174225       0.000000       0.111419   -9999.000000       0.221000       0.053900   -9999.000000
53289     53289     neimenggu      113.8300       42.2408           71       175     2012      11        24        329              0.078167      -9.027222       0.000000       0.110742   -9999.000000   -9999.000000       0.055300       0.207000
53289     53289     neimenggu      113.8300       42.2408           71       175     2012      11        25        330              0.073250      -6.543549       0.000000       0.111448   -9999.000000   -9999.000000       0.055100       0.206000
53289     53289     neimenggu      113.8300       42.2408           71       175     2012      11        26        331              0.063958      -9.822327       0.000000       0.110495   -9999.000000   -9999.000000   -9999.000000       0.266000
53289     53289     neimenggu      113.8300       42.2408           71       175     2012      11        27        332              0.060958      -7.992493       0.000000       0.110529   -9999.000000   -9999.000000       0.059300       0.241000
53289     53289     neimenggu      113.8300       42.2408           71       175     2012      11        28        333              0.059750      -8.183350       0.000000       0.110924   -9999.000000   -9999.000000       0.060200       0.137000
53289     53289     neimenggu      113.8300       42.2408           71       175     2012      11        29        334              0.053375     -12.435272       0.000000       0.108635   -9999.000000   -9999.000000       0.055200       0.148000
53289     53289     neimenggu      113.8300       42.2408           71       175     2012      11        30        335              0.045000     -14.886444       0.000000       0.105434   -9999.000000   -9999.000000       0.056700       0.175000
53289     53289     neimenggu      113.8300       42.2408           71       175     2012      12        01        336              0.044625     -13.181519       0.000000       0.103848   -9999.000000   -9999.000000       0.060900   -9999.000000
53289     53289     neimenggu      113.8300       42.2408           71       175     2012      12        02        337              0.046458      -7.671844       0.000000       0.105544   -9999.000000   -9999.000000       0.053900       0.168000
53289     53289     neimenggu      113.8300       42.2408           71       175     2012      12        03        338              0.049000      -8.641174       0.000000       0.106358   -9999.000000   -9999.000000       0.058600       0.179000
53289     53289     neimenggu      113.8300       42.2408           71       175     2012      12        04        339              0.048625     -13.217651       0.000000       0.104764   -9999.000000   -9999.000000       0.054400       0.165000
53289     53289     neimenggu      113.8300       42.2408           71       175     2012      12        05        340              0.045833     -13.868591       0.000000       0.104310   -9999.000000   -9999.000000       0.058200       0.119000
53289     53289     neimenggu      113.8300       42.2408           71       175     2012      12        06        341              0.044667     -16.801086       0.000000       0.103450   -9999.000000   -9999.000000       0.055700       0.133000
53289     53289     neimenggu      113.8300       42.2408           71       175     2012      12        07        342              0.040792     -15.887390       0.000000       0.103455   -9999.000000   -9999.000000       0.058300       0.156000
53289     53289     neimenggu      113.8300       42.2408           71       175     2012      12        08        343              0.038500     -18.870056       0.000000       0.102316   -9999.000000   -9999.000000       0.060500       0.138000
53289     53289     neimenggu      113.8300       42.2408           71       175     2012      12        09        344              0.035250     -20.129929       0.000000       0.100821   -9999.000000   -9999.000000       0.059700       0.169000
53289     53289     neimenggu      113.8300       42.2408           71       175     2012      12        10        345              0.035250     -15.705841       0.000000       0.101375   -9999.000000   -9999.000000       0.051800       0.098000
53289     53289     neimenggu      113.8300       42.2408           71       175     2012      12        11        346              0.035000     -15.386658       0.000000       0.102014   -9999.000000   -9999.000000       0.051100       0.168000
53289     53289     neimenggu      113.8300       42.2408           71       175     2012      12        12        347              0.035833     -12.501831       0.000000       0.102255   -9999.000000   -9999.000000       0.049900   -9999.000000
53289     53289     neimenggu      113.8300       42.2408           71       175     2012      12        13        348              0.035667     -10.140869       0.000000       0.103023   -9999.000000   -9999.000000       0.051800       0.176000
53289     53289     neimenggu      113.8300       42.2408           71       175     2012      12        14        349              0.037667      -9.254791       0.000000       0.103811   -9999.000000   -9999.000000       0.050100       0.152000
53289     53289     neimenggu      113.8300       42.2408           71       175     2012      12        15        350              0.000000      -6.833527       0.000000       0.103995   -9999.000000   -9999.000000   -9999.000000       0.188000
53289     53289     neimenggu      113.8300       42.2408           71       175     2012      12        16        351              0.039042      -9.529175       0.000000       0.104230   -9999.000000   -9999.000000       0.042500       0.199000
53289     53289     neimenggu      113.8300       42.2408           71       175     2012      12        17        352              0.039792     -12.611603       0.000000       0.103841   -9999.000000   -9999.000000       0.048900   -9999.000000
53289     53289     neimenggu      113.8300       42.2408           71       175     2012      12        18        353              0.038167     -17.673203       0.000000       0.102146   -9999.000000   -9999.000000       0.049000       0.166000
53289     53289     neimenggu      113.8300       42.2408           71       175     2012      12        19        354              0.038750     -14.497650       0.000000       0.102188   -9999.000000   -9999.000000       0.045700       0.157000
53289     53289     neimenggu      113.8300       42.2408           71       175     2012      12        20        355              0.000000     -12.427094       0.000000       0.103048   -9999.000000   -9999.000000       0.047300       0.204000
53289     53289     neimenggu      113.8300       42.2408           71       175     2012      12        21        356              0.039000     -12.665314       0.000000       0.103477   -9999.000000   -9999.000000       0.044200       0.182000
53289     53289     neimenggu      113.8300       42.2408           71       175     2012      12        22        357              0.039000     -16.689178       0.000000       0.102500   -9999.000000   -9999.000000       0.051900   -9999.000000
53289     53289     neimenggu      113.8300       42.2408           71       175     2012      12        23        358              0.037833     -20.615692       0.000000       0.101198   -9999.000000   -9999.000000   -9999.000000       0.132000
53289     53289     neimenggu      113.8300       42.2408           71       175     2012      12        24        359              0.035500     -19.778778       0.000000       0.100148   -9999.000000   -9999.000000       0.057600       0.140000
53289     53289     neimenggu      113.8300       42.2408           71       175     2012      12        25        360              0.034250     -21.545746       0.000000       0.100111   -9999.000000   -9999.000000       0.058200       0.157000
53289     53289     neimenggu      113.8300       42.2408           71       175     2012      12        26        361              0.000000     -19.107758       0.000000       0.099894   -9999.000000   -9999.000000       0.057700       0.170000
53289     53289     neimenggu      113.8300       42.2408           71       175     2012      12        27        362              0.032000     -15.024841       0.000000       0.100436   -9999.000000   -9999.000000       0.053200       0.129000
53289     53289     neimenggu      113.8300       42.2408           71       175     2012      12        28        363              0.000000     -12.261383       0.000000       0.100569   -9999.000000   -9999.000000       0.054000       0.125000
53289     53289     neimenggu      113.8300       42.2408           71       175     2012      12        29        364              0.000000     -15.103729       0.000000       0.100835   -9999.000000   -9999.000000   -9999.000000       0.150000
53289     53289     neimenggu      113.8300       42.2408           71       175     2012      12        30        365              0.000000     -17.945724       0.000000       0.101073   -9999.000000   -9999.000000       0.056000   -9999.000000
53289     53289     neimenggu      113.8300       42.2408           71       175     2012      12        31        366              0.032000     -17.430908       0.000000       0.101118   -9999.000000   -9999.000000       0.050700   -9999.000000
