# Supplementary material for: Research on Fusing Multisatellite Soil Moisture Data Based on Bayesian Model Averaging
Source: Hindawi journal article supplement (doi:10.1155/2018/9310838), 2018-06-25
Supplement: f1 [file 9310838.f1.zip › 2012_sm00-10cm_daily_ZDB_ZHY_53368_366days_allin.txt]

53368     53368     neimenggu      111.4608       41.0761           76       166     2012      01        01        001              0.000000   -9999.000000       0.000000   -9999.000000   -9999.000000   -9999.000000       0.033100   -9999.000000
53368     53368     neimenggu      111.4608       41.0761           76       166     2012      01        02        002              0.000000     -11.679352       0.000000       0.090875   -9999.000000   -9999.000000       0.031100       0.016000
53368     53368     neimenggu      111.4608       41.0761           76       166     2012      01        03        003              0.000000     -14.810211       0.000000       0.090513   -9999.000000   -9999.000000       0.031700       0.119000
53368     53368     neimenggu      111.4608       41.0761           76       166     2012      01        04        004              0.000000     -17.124054       0.000000       0.089671   -9999.000000   -9999.000000       0.031900       0.030000
53368     53368     neimenggu      111.4608       41.0761           76       166     2012      01        05        005              0.000000     -14.824921       0.000000       0.089861   -9999.000000   -9999.000000       0.034500       0.015000
53368     53368     neimenggu      111.4608       41.0761           76       166     2012      01        06        006              0.000000     -13.656403       0.000000       0.089995   -9999.000000   -9999.000000       0.027600       0.053000
53368     53368     neimenggu      111.4608       41.0761           76       166     2012      01        07        007              0.000000     -12.291504       0.000000       0.090267   -9999.000000   -9999.000000       0.028100       0.057000
53368     53368     neimenggu      111.4608       41.0761           76       166     2012      01        08        008              0.000000     -12.574127       0.000000       0.090274   -9999.000000   -9999.000000       0.030800       0.030000
53368     53368     neimenggu      111.4608       41.0761           76       166     2012      01        09        009              0.000000     -12.723358       0.000000       0.090098   -9999.000000   -9999.000000   -9999.000000       0.010000
53368     53368     neimenggu      111.4608       41.0761           76       166     2012      01        10        010              0.000000     -12.753845       0.000000       0.089995   -9999.000000   -9999.000000       0.038800       0.017000
53368     53368     neimenggu      111.4608       41.0761           76       166     2012      01        11        011              0.000000     -14.741547       0.000000       0.089636   -9999.000000   -9999.000000       0.037500       0.045000
53368     53368     neimenggu      111.4608       41.0761           76       166     2012      01        12        012              0.000000     -12.829620       0.000000       0.089760   -9999.000000   -9999.000000       0.025700       0.067000
53368     53368     neimenggu      111.4608       41.0761           76       166     2012      01        13        013              0.000000     -11.908173       0.000000       0.090111   -9999.000000   -9999.000000       0.035100   -9999.000000
53368     53368     neimenggu      111.4608       41.0761           76       166     2012      01        14        014              0.000000     -11.862671       0.000000       0.089964   -9999.000000   -9999.000000   -9999.000000       0.040000
53368     53368     neimenggu      111.4608       41.0761           76       166     2012      01        15        015              0.000000     -10.452820       0.000000       0.090279   -9999.000000   -9999.000000       0.032300       0.015000
53368     53368     neimenggu      111.4608       41.0761           76       166     2012      01        16        016              0.000000      -9.671692       0.000000       0.090569   -9999.000000   -9999.000000       0.035500       0.040000
53368     53368     neimenggu      111.4608       41.0761           76       166     2012      01        17        017              0.000000      -9.377930       0.000000       0.090603   -9999.000000   -9999.000000       0.026500       0.105000
53368     53368     neimenggu      111.4608       41.0761           76       166     2012      01        18        018              0.000000     -10.127563       0.000000       0.090059   -9999.000000   -9999.000000       0.027000   -9999.000000
53368     53368     neimenggu      111.4608       41.0761           76       166     2012      01        19        019              0.000000      -9.093964       0.000000       0.090238   -9999.000000   -9999.000000       0.034300       0.070000
53368     53368     neimenggu      111.4608       41.0761           76       166     2012      01        20        020              0.000000     -12.342590       0.000000       0.089536   -9999.000000   -9999.000000       0.035700       0.016000
53368     53368     neimenggu      111.4608       41.0761           76       166     2012      01        21        021              0.000000     -16.614075       0.000000       0.088231   -9999.000000   -9999.000000       0.038400       0.054000
53368     53368     neimenggu      111.4608       41.0761           76       166     2012      01        22        022              0.000000     -18.484879       0.000000       0.087682   -9999.000000   -9999.000000       0.037100       0.090000
53368     53368     neimenggu      111.4608       41.0761           76       166     2012      01        23        023              0.000000     -17.381714       0.000000       0.087861   -9999.000000   -9999.000000       0.032000   -9999.000000
53368     53368     neimenggu      111.4608       41.0761           76       166     2012      01        24        024              0.000000     -16.674347       0.000000       0.088078   -9999.000000   -9999.000000   -9999.000000       0.095000
53368     53368     neimenggu      111.4608       41.0761           76       166     2012      01        25        025              0.000000     -15.151337       0.000000       0.088352   -9999.000000   -9999.000000       0.037300       0.032000
53368     53368     neimenggu      111.4608       41.0761           76       166     2012      01        26        026              0.000000     -12.647919       0.000000       0.088948   -9999.000000   -9999.000000       0.041800       0.030000
53368     53368     neimenggu      111.4608       41.0761           76       166     2012      01        27        027              0.000000     -12.489594       0.000000       0.088841   -9999.000000   -9999.000000       0.043100       0.087000
53368     53368     neimenggu      111.4608       41.0761           76       166     2012      01        28        028              0.000000     -10.536865       0.000000       0.088878   -9999.000000   -9999.000000       0.037800   -9999.000000
53368     53368     neimenggu      111.4608       41.0761           76       166     2012      01        29        029              0.000000     -12.664703       0.000000       0.088379   -9999.000000   -9999.000000       0.030300       0.093000
53368     53368     neimenggu      111.4608       41.0761           76       166     2012      01        30        030              0.000000     -12.215027       0.000000       0.088016   -9999.000000   -9999.000000       0.041800       0.044000
53368     53368     neimenggu      111.4608       41.0761           76       166     2012      01        31        031              0.000000     -10.811432       0.000000       0.088104   -9999.000000   -9999.000000   -9999.000000       0.058000
53368     53368     neimenggu      111.4608       41.0761           76       166     2012      02        01        032              0.000000     -14.569855       0.000000       0.087319   -9999.000000   -9999.000000       0.042500       0.129000
53368     53368     neimenggu      111.4608       41.0761           76       166     2012      02        02        033              0.000000     -16.264679       0.000000       0.086897   -9999.000000   -9999.000000       0.047800       0.058000
53368     53368     neimenggu      111.4608       41.0761           76       166     2012      02        03        034              0.000000     -13.536926       0.000000       0.087325   -9999.000000   -9999.000000       0.034500       0.007000
53368     53368     neimenggu      111.4608       41.0761           76       166     2012      02        04        035              0.000000     -12.546967       0.000000       0.087614   -9999.000000   -9999.000000       0.033400       0.066000
53368     53368     neimenggu      111.4608       41.0761           76       166     2012      02        05        036              0.000000     -10.065125       0.000000       0.087923   -9999.000000   -9999.000000       0.041200       0.081000
53368     53368     neimenggu      111.4608       41.0761           76       166     2012      02        06        037              0.000000      -9.917053       0.000000       0.088893   -9999.000000   -9999.000000       0.050900       0.035000
53368     53368     neimenggu      111.4608       41.0761           76       166     2012      02        07        038              0.000000     -16.392548       0.000000       0.086508   -9999.000000   -9999.000000       0.053800       0.043000
53368     53368     neimenggu      111.4608       41.0761           76       166     2012      02        08        039              0.000000     -15.599060       0.000000       0.086739   -9999.000000   -9999.000000       0.055000       0.052000
53368     53368     neimenggu      111.4608       41.0761           76       166     2012      02        09        040              0.000000     -13.134430       0.000000       0.087187   -9999.000000   -9999.000000       0.042800       0.049000
53368     53368     neimenggu      111.4608       41.0761           76       166     2012      02        10        041              0.000000     -11.891510       0.000000       0.087237   -9999.000000   -9999.000000       0.047600       0.149000
53368     53368     neimenggu      111.4608       41.0761           76       166     2012      02        11        042              0.000000     -10.386963       0.736471       0.087382   -9999.000000   -9999.000000       0.049100   -9999.000000
53368     53368     neimenggu      111.4608       41.0761           76       166     2012      02        12        043              0.000000      -7.775848       0.000000       0.092873   -9999.000000   -9999.000000   -9999.000000       0.056000
53368     53368     neimenggu      111.4608       41.0761           76       166     2012      02        13        044              0.000000      -5.585327       0.000000       0.111728   -9999.000000   -9999.000000   -9999.000000       0.014000
53368     53368     neimenggu      111.4608       41.0761           76       166     2012      02        14        045              0.000000      -6.621124       0.000000       0.116178   -9999.000000   -9999.000000   -9999.000000       0.065000
53368     53368     neimenggu      111.4608       41.0761           76       166     2012      02        15        046              0.000000      -8.651581       0.000000       0.100419   -9999.000000   -9999.000000       0.031100       0.121000
53368     53368     neimenggu      111.4608       41.0761           76       166     2012      02        16        047              0.000000     -10.696075       0.000000       0.094186   -9999.000000   -9999.000000       0.053500   -9999.000000
53368     53368     neimenggu      111.4608       41.0761           76       166     2012      02        17        048              0.000000     -12.636078       0.000000       0.092752   -9999.000000   -9999.000000       0.065400       0.055000
53368     53368     neimenggu      111.4608       41.0761           76       166     2012      02        18        049              0.000000     -12.574371       0.000000       0.092054   -9999.000000   -9999.000000       0.052500       0.052000
53368     53368     neimenggu      111.4608       41.0761           76       166     2012      02        19        050              0.000000     -10.322510       1.339314       0.092301   -9999.000000   -9999.000000       0.057900       0.047000
53368     53368     neimenggu      111.4608       41.0761           76       166     2012      02        20        051              0.000000      -7.644836       0.000000       0.101521   -9999.000000   -9999.000000       0.047100       0.163000
53368     53368     neimenggu      111.4608       41.0761           76       166     2012      02        21        052              0.000000      -4.125519       0.000000       0.130324   -9999.000000   -9999.000000   -9999.000000   -9999.000000
53368     53368     neimenggu      111.4608       41.0761           76       166     2012      02        22        053              0.000000      -0.067963       0.000000       0.163678   -9999.000000   -9999.000000       0.056300       0.104000
53368     53368     neimenggu      111.4608       41.0761           76       166     2012      02        23        054              0.000000      -5.690674       0.000000       0.124981   -9999.000000   -9999.000000       0.062900       0.114000
53368     53368     neimenggu      111.4608       41.0761           76       166     2012      02        24        055              0.000000      -3.300476       0.000000       0.132396   -9999.000000   -9999.000000       0.061600       0.048000
53368     53368     neimenggu      111.4608       41.0761           76       166     2012      02        25        056              0.000000      -7.251129       0.000000       0.112474   -9999.000000   -9999.000000       0.064300       0.143000
53368     53368     neimenggu      111.4608       41.0761           76       166     2012      02        26        057              0.000000      -7.604736       0.000000       0.100971   -9999.000000   -9999.000000       0.051800   -9999.000000
53368     53368     neimenggu      111.4608       41.0761           76       166     2012      02        27        058              0.000000      -5.651947       0.000000       0.123650   -9999.000000   -9999.000000   -9999.000000       0.118000
53368     53368     neimenggu      111.4608       41.0761           76       166     2012      02        28        059              0.000000      -3.380890       0.000000       0.135170   -9999.000000   -9999.000000       0.062900       0.112000
53368     53368     neimenggu      111.4608       41.0761           76       166     2012      02        29        060              0.000000   -9999.000000       0.000000   -9999.000000   -9999.000000   -9999.000000   -9999.000000   -9999.000000
53368     53368     neimenggu      111.4608       41.0761           76       166     2012      03        01        061              0.000000      -0.907532       0.000000       0.157128   -9999.000000       0.095400       0.067800       0.103000
53368     53368     neimenggu      111.4608       41.0761           76       166     2012      03        02        062              0.000000      -2.808319       0.000000       0.144079   -9999.000000   -9999.000000       0.057300       0.095000
53368     53368     neimenggu      111.4608       41.0761           76       166     2012      03        03        063              0.000000      -0.159302       0.000000       0.159213   -9999.000000   -9999.000000       0.049000       0.063000
53368     53368     neimenggu      111.4608       41.0761           76       166     2012      03        04        064              0.000000      -0.920959       0.291998       0.155079   -9999.000000   -9999.000000       0.067600       0.061000
53368     53368     neimenggu      111.4608       41.0761           76       166     2012      03        05        065              0.000000      -1.776947       0.000000       0.145306   -9999.000000   -9999.000000       0.061500       0.092000
53368     53368     neimenggu      111.4608       41.0761           76       166     2012      03        06        066              0.000000      -8.211334       0.000000       0.104401   -9999.000000   -9999.000000       0.063400       0.054000
53368     53368     neimenggu      111.4608       41.0761           76       166     2012      03        07        067              0.000000      -5.999725       0.000000       0.113685   -9999.000000   -9999.000000       0.068600       0.110000
53368     53368     neimenggu      111.4608       41.0761           76       166     2012      03        08        068              0.000000      -7.729858       0.000000       0.107955   -9999.000000   -9999.000000       0.054000       0.091000
53368     53368     neimenggu      111.4608       41.0761           76       166     2012      03        09        069              0.000000      -5.407166       0.000000       0.116565   -9999.000000   -9999.000000       0.063300       0.093000
53368     53368     neimenggu      111.4608       41.0761           76       166     2012      03        10        070              0.000000      -4.035553       0.000000       0.139819   -9999.000000   -9999.000000       0.059800       0.159000
53368     53368     neimenggu      111.4608       41.0761           76       166     2012      03        11        071              0.000000      -9.467010       0.000000       0.098585   -9999.000000   -9999.000000       0.058200   -9999.000000
53368     53368     neimenggu      111.4608       41.0761           76       166     2012      03        12        072              0.000000      -5.765228       0.000000       0.117877   -9999.000000   -9999.000000       0.069600       0.083000
53368     53368     neimenggu      111.4608       41.0761           76       166     2012      03        13        073              0.000000      -3.092010       0.000000       0.138773   -9999.000000   -9999.000000       0.071400       0.073000
53368     53368     neimenggu      111.4608       41.0761           76       166     2012      03        14        074              0.000000      -1.134644       0.000000       0.155722   -9999.000000   -9999.000000   -9999.000000       0.157000
53368     53368     neimenggu      111.4608       41.0761           76       166     2012      03        15        075              0.000000       1.745056       0.000000       0.175553   -9999.000000   -9999.000000       0.085000       0.137000
53368     53368     neimenggu      111.4608       41.0761           76       166     2012      03        16        076              0.000000       0.913574       0.575052       0.183713       0.119000   -9999.000000       0.092000   -9999.000000
53368     53368     neimenggu      111.4608       41.0761           76       166     2012      03        17        077              0.000000       2.979706       0.000000       0.197811       0.116000       0.022900       0.064900       0.206000
53368     53368     neimenggu      111.4608       41.0761           76       166     2012      03        18        078              0.000000       1.040222       0.091792       0.176709   -9999.000000   -9999.000000       0.076500       0.155000
53368     53368     neimenggu      111.4608       41.0761           76       166     2012      03        19        079              0.000000       0.881378       0.000000       0.170578   -9999.000000   -9999.000000       0.074200       0.228000
53368     53368     neimenggu      111.4608       41.0761           76       166     2012      03        20        080              0.000000       2.115601       1.183019       0.182327       0.091000   -9999.000000       0.068700       0.170000
53368     53368     neimenggu      111.4608       41.0761           76       166     2012      03        21        081              0.000000       3.010254       0.486173       0.190591       0.107000   -9999.000000       0.090500   -9999.000000
53368     53368     neimenggu      111.4608       41.0761           76       166     2012      03        22        082              0.000000       2.181274       0.000000       0.192362   -9999.000000   -9999.000000       0.073200       0.224000
53368     53368     neimenggu      111.4608       41.0761           76       166     2012      03        23        083              0.000000       1.607971       0.000000       0.185651   -9999.000000   -9999.000000       0.072100       0.114000
53368     53368     neimenggu      111.4608       41.0761           76       166     2012      03        24        084              0.000000       0.027985       0.316281       0.162713   -9999.000000   -9999.000000   -9999.000000       0.189000
53368     53368     neimenggu      111.4608       41.0761           76       166     2012      03        25        085              0.000000       2.412018       1.385622       0.182919       0.087000       0.061700       0.076300       0.164000
53368     53368     neimenggu      111.4608       41.0761           76       166     2012      03        26        086              0.000000       4.394196       0.102694       0.195557       0.083000   -9999.000000       0.079800   -9999.000000
53368     53368     neimenggu      111.4608       41.0761           76       166     2012      03        27        087              0.000000       4.817871       0.000000       0.200085       0.093000       0.034900       0.080600       0.232000
53368     53368     neimenggu      111.4608       41.0761           76       166     2012      03        28        088              0.000000       6.255066       0.496305       0.210000       0.098000       0.044200       0.104100       0.669000
53368     53368     neimenggu      111.4608       41.0761           76       166     2012      03        29        089              0.000000       6.020020       3.858352       0.223599   -9999.000000   -9999.000000       0.081700       0.461000
53368     53368     neimenggu      111.4608       41.0761           76       166     2012      03        30        090              0.000000       4.453369       0.000000       0.208163   -9999.000000       0.043800       0.091700       0.249000
53368     53368     neimenggu      111.4608       41.0761           76       166     2012      03        31        091              0.000000       1.211731       1.327438       0.206040       0.095000   -9999.000000       0.083600       0.086000
53368     53368     neimenggu      111.4608       41.0761           76       166     2012      04        01        092              0.120000       5.094360       0.000000       0.223216       0.095000   -9999.000000       0.091200       0.220000
53368     53368     neimenggu      111.4608       41.0761           76       166     2012      04        02        093              0.000000       6.635925       0.000000       0.222555       0.099000       0.068000       0.084100       0.117000
53368     53368     neimenggu      111.4608       41.0761           76       166     2012      04        03        094              0.000000       2.556458       0.000000       0.186556   -9999.000000   -9999.000000       0.088100       0.149000
53368     53368     neimenggu      111.4608       41.0761           76       166     2012      04        04        095              0.000000       4.116486       0.144343       0.201378   -9999.000000       0.049100       0.096600       0.096000
53368     53368     neimenggu      111.4608       41.0761           76       166     2012      04        05        096              0.000000       4.864105       0.000000       0.201554       0.087000   -9999.000000       0.076000       0.041000
53368     53368     neimenggu      111.4608       41.0761           76       166     2012      04        06        097              0.106000       5.138611       0.000000       0.205746       0.086000   -9999.000000       0.071400       0.116000
53368     53368     neimenggu      111.4608       41.0761           76       166     2012      04        07        098              0.000000       7.875122       0.532161       0.218224       0.085000       0.045400       0.082900       0.189000
53368     53368     neimenggu      111.4608       41.0761           76       166     2012      04        08        099              0.000000       8.374878       0.000000       0.207499   -9999.000000   -9999.000000       0.096800       0.266000
53368     53368     neimenggu      111.4608       41.0761           76       166     2012      04        09        100              0.000000       9.812012       0.000000       0.215479       0.085000   -9999.000000       0.089000   -9999.000000
53368     53368     neimenggu      111.4608       41.0761           76       166     2012      04        10        101              0.000000      12.056641       0.000000       0.211322       0.081000   -9999.000000       0.079600       0.047000
53368     53368     neimenggu      111.4608       41.0761           76       166     2012      04        11        102              0.000000       6.506500       0.000000       0.195312       0.075000       0.129700       0.077100       0.041000
53368     53368     neimenggu      111.4608       41.0761           76       166     2012      04        12        103              0.000000       3.957825       0.000000       0.193795       0.082000       0.036200       0.070000       0.101000
53368     53368     neimenggu      111.4608       41.0761           76       166     2012      04        13        104              0.000000       7.981903       0.000000       0.208456       0.092000   -9999.000000       0.077300       0.312000
53368     53368     neimenggu      111.4608       41.0761           76       166     2012      04        14        105              0.000000      10.542877       7.030261       0.205315   -9999.000000       0.085300       0.085400   -9999.000000
53368     53368     neimenggu      111.4608       41.0761           76       166     2012      04        15        106              0.000000      11.768524       0.082940       0.199892       0.073000   -9999.000000       0.084600       0.062000
53368     53368     neimenggu      111.4608       41.0761           76       166     2012      04        16        107              0.000000       8.327484       0.000000       0.189999       0.073000   -9999.000000       0.090700       0.196000
53368     53368     neimenggu      111.4608       41.0761           76       166     2012      04        17        108              0.000000      11.326813       0.000000       0.194608       0.077000   -9999.000000       0.070700       0.051000
53368     53368     neimenggu      111.4608       41.0761           76       166     2012      04        18        109              0.000000      13.920685       0.119242       0.189009       0.088000   -9999.000000   -9999.000000       0.166000
53368     53368     neimenggu      111.4608       41.0761           76       166     2012      04        19        110              0.000000      11.557892       0.000000       0.190624   -9999.000000   -9999.000000   -9999.000000   -9999.000000
53368     53368     neimenggu      111.4608       41.0761           76       166     2012      04        20        111              0.000000      11.094635       0.087960       0.187794   -9999.000000       0.081200       0.094100       0.040000
53368     53368     neimenggu      111.4608       41.0761           76       166     2012      04        21        112              0.000000      12.236237       0.000000       0.186073       0.073000   -9999.000000       0.091600       0.148000
53368     53368     neimenggu      111.4608       41.0761           76       166     2012      04        22        113              0.000000      13.518341       0.000000       0.183784       0.075000       0.011700   -9999.000000       0.065000
53368     53368     neimenggu      111.4608       41.0761           76       166     2012      04        23        114              0.140000      16.970520      10.157716       0.176525   -9999.000000   -9999.000000       0.137900       0.686000
53368     53368     neimenggu      111.4608       41.0761           76       166     2012      04        24        115              0.000000      11.678192       0.000000       0.248487   -9999.000000   -9999.000000       0.093400   -9999.000000
53368     53368     neimenggu      111.4608       41.0761           76       166     2012      04        25        116              0.000000       8.440582       0.123698       0.239416   -9999.000000       0.107800       0.096700       0.043000
53368     53368     neimenggu      111.4608       41.0761           76       166     2012      04        26        117              0.000000       7.647034       0.073486       0.230264       0.082500   -9999.000000       0.094900       0.150000
53368     53368     neimenggu      111.4608       41.0761           76       166     2012      04        27        118              0.000000      10.798309       0.000000       0.221624       0.070000   -9999.000000   -9999.000000       0.150000
53368     53368     neimenggu      111.4608       41.0761           76       166     2012      04        28        119              0.112000       8.082031       0.000000       0.215280       0.082000   -9999.000000       0.075800       0.109000
53368     53368     neimenggu      111.4608       41.0761           76       166     2012      04        29        120              0.110000      13.054596       0.000000       0.208308       0.082000   -9999.000000       0.078500       0.004000
53368     53368     neimenggu      111.4608       41.0761           76       166     2012      04        30        121              0.000000      16.590912       0.461670       0.199817       0.062000       0.217400       0.082100       0.086000
53368     53368     neimenggu      111.4608       41.0761           76       166     2012      05        01        122              0.105000      14.530914       0.884375       0.204245       0.081500   -9999.000000       0.093300       0.185000
53368     53368     neimenggu      111.4608       41.0761           76       166     2012      05        02        123              0.000000      14.943817       1.103042       0.202571       0.075000   -9999.000000       0.100600       0.235000
53368     53368     neimenggu      111.4608       41.0761           76       166     2012      05        03        124              0.000000      16.602264       0.000000       0.198284       0.081000       0.106300       0.099000       0.073000
53368     53368     neimenggu      111.4608       41.0761           76       166     2012      05        04        125              0.000000      18.335541       0.000000       0.187357       0.069500   -9999.000000       0.070000       0.012000
53368     53368     neimenggu      111.4608       41.0761           76       166     2012      05        05        126              0.000000      19.471405       0.000000       0.176728       0.052000       0.068600       0.080800       0.195000
53368     53368     neimenggu      111.4608       41.0761           76       166     2012      05        06        127              0.000000      19.735626       0.644711       0.169033       0.071000   -9999.000000   -9999.000000       0.142000
53368     53368     neimenggu      111.4608       41.0761           76       166     2012      05        07        128              0.000000      20.860352       0.541664       0.169743   -9999.000000   -9999.000000       0.094000       0.259000
53368     53368     neimenggu      111.4608       41.0761           76       166     2012      05        08        129              0.000000      19.163055       0.000000       0.175725       0.071000       0.118700       0.089100   -9999.000000
53368     53368     neimenggu      111.4608       41.0761           76       166     2012      05        09        130              0.000000      21.056213       2.208934       0.167840       0.080000   -9999.000000       0.094700       0.276000
53368     53368     neimenggu      111.4608       41.0761           76       166     2012      05        10        131              0.000000      19.226654       6.970921       0.191625       0.180000       0.161200       0.080700       0.317000
53368     53368     neimenggu      111.4608       41.0761           76       166     2012      05        11        132              0.000000      20.264496       0.758193       0.216482   -9999.000000   -9999.000000       0.133600       0.756000
53368     53368     neimenggu      111.4608       41.0761           76       166     2012      05        12        133              0.000000      15.469421       0.853016       0.238432       0.094000   -9999.000000       0.097900       0.274000
53368     53368     neimenggu      111.4608       41.0761           76       166     2012      05        13        134              0.000000      13.284546       0.844269       0.219626       0.086000       0.099300       0.095400   -9999.000000
53368     53368     neimenggu      111.4608       41.0761           76       166     2012      05        14        135              0.000000      10.719849       1.110551       0.210613       0.081000       0.143800       0.099200       0.035000
53368     53368     neimenggu      111.4608       41.0761           76       166     2012      05        15        136              0.000000      11.486053       0.000000       0.202953   -9999.000000       0.053400       0.075800       0.084000
53368     53368     neimenggu      111.4608       41.0761           76       166     2012      05        16        137              0.000000      13.281097       0.000000       0.195662   -9999.000000   -9999.000000       0.076400       0.165000
53368     53368     neimenggu      111.4608       41.0761           76       166     2012      05        17        138              0.000000      15.098846       0.000000       0.187764       0.077500       0.229500       0.074200       0.149000
53368     53368     neimenggu      111.4608       41.0761           76       166     2012      05        18        139              0.000000      19.099304       0.105981       0.177659       0.066000   -9999.000000       0.090500   -9999.000000
53368     53368     neimenggu      111.4608       41.0761           76       166     2012      05        19        140              0.000000      19.695038       0.636389       0.172068       0.072000   -9999.000000       0.101200       0.138000
53368     53368     neimenggu      111.4608       41.0761           76       166     2012      05        20        141              0.000000      19.680847       0.000000       0.174951       0.078000       0.058300   -9999.000000       0.212000
53368     53368     neimenggu      111.4608       41.0761           76       166     2012      05        21        142              0.000000      23.498444       2.358081       0.167478   -9999.000000       0.021300       0.142300       0.183000
53368     53368     neimenggu      111.4608       41.0761           76       166     2012      05        22        143              0.000000      13.853302       0.000000       0.196661       0.091000       0.372100       0.085300       0.170000
53368     53368     neimenggu      111.4608       41.0761           76       166     2012      05        23        144              0.000000      14.981445       0.000000       0.190226   -9999.000000       0.184400       0.095900   -9999.000000
53368     53368     neimenggu      111.4608       41.0761           76       166     2012      05        24        145              0.000000      16.138702       1.065693       0.178667       0.072000   -9999.000000       0.109600       0.163000
53368     53368     neimenggu      111.4608       41.0761           76       166     2012      05        25        146              0.000000      16.977783       0.874511       0.174349       0.085500   -9999.000000       0.094400       0.129000
53368     53368     neimenggu      111.4608       41.0761           76       166     2012      05        26        147              0.000000      16.468323       0.000000       0.192419       0.058000       0.085900       0.071300       0.205000
53368     53368     neimenggu      111.4608       41.0761           76       166     2012      05        27        148              0.093000      19.847626       0.000000       0.175311       0.073000   -9999.000000       0.072500       0.230000
53368     53368     neimenggu      111.4608       41.0761           76       166     2012      05        28        149              0.000000      22.301331      16.593042       0.162098       0.075000   -9999.000000       0.074300       0.184000
53368     53368     neimenggu      111.4608       41.0761           76       166     2012      05        29        150              0.000000      20.268799       0.940477       0.211901       0.151000   -9999.000000       0.141200       0.583000
53368     53368     neimenggu      111.4608       41.0761           76       166     2012      05        30        151              0.000000      13.104218       1.991195       0.265609       0.090000       0.137100       0.082900   -9999.000000
53368     53368     neimenggu      111.4608       41.0761           76       166     2012      05        31        152              0.000000      16.289886       1.484058       0.245434       0.105000       0.114300   -9999.000000   -9999.000000
53368     53368     neimenggu      111.4608       41.0761           76       166     2012      06        01        153              0.000000      16.426727       0.000000       0.245037       0.092000   -9999.000000       0.073400       0.163000
53368     53368     neimenggu      111.4608       41.0761           76       166     2012      06        02        154              0.000000      16.552277       0.283921       0.227182       0.087500       0.030700       0.093800       0.195000
53368     53368     neimenggu      111.4608       41.0761           76       166     2012      06        03        155              0.000000      17.536011       1.299123       0.218925       0.092000   -9999.000000       0.075200       0.185000
53368     53368     neimenggu      111.4608       41.0761           76       166     2012      06        04        156              0.000000      18.777679       0.000000       0.209914       0.082000   -9999.000000       0.108600       0.152000
53368     53368     neimenggu      111.4608       41.0761           76       166     2012      06        05        157              0.000000      19.768982      15.868253       0.198938       0.147000       0.095800       0.208000       0.734000
53368     53368     neimenggu      111.4608       41.0761           76       166     2012      06        06        158              0.135000      20.803436       2.545408       0.250487       0.131000       0.193900       0.135500   -9999.000000
53368     53368     neimenggu      111.4608       41.0761           76       166     2012      06        07        159              0.000000      16.602264       1.365352       0.275194       0.134000       0.126700       0.149300       0.343000
53368     53368     neimenggu      111.4608       41.0761           76       166     2012      06        08        160              0.000000      16.549377       0.968037       0.260885       0.107000       0.244200       0.105200       0.340000
53368     53368     neimenggu      111.4608       41.0761           76       166     2012      06        09        161              0.000000      18.970062       0.097998       0.249542       0.108000   -9999.000000       0.108800       0.304000
53368     53368     neimenggu      111.4608       41.0761           76       166     2012      06        10        162              0.000000      16.223846       0.000000       0.238379       0.082500       0.113900       0.105600       0.243000
53368     53368     neimenggu      111.4608       41.0761           76       166     2012      06        11        163              0.000000      15.787598       0.089250       0.226977       0.093000   -9999.000000       0.123000   -9999.000000
53368     53368     neimenggu      111.4608       41.0761           76       166     2012      06        12        164              0.000000      17.687500       0.167521       0.217682       0.099000   -9999.000000       0.091200       0.209000
53368     53368     neimenggu      111.4608       41.0761           76       166     2012      06        13        165              0.000000      18.977997       3.024557       0.210878       0.127500       0.181700       0.125900       0.319000
53368     53368     neimenggu      111.4608       41.0761           76       166     2012      06        14        166              0.000000      13.778137       0.081677       0.237750       0.102000   -9999.000000       0.106600       0.269000
53368     53368     neimenggu      111.4608       41.0761           76       166     2012      06        15        167              0.000000      13.929901       0.000000       0.228695       0.095000       0.095900       0.119400       0.272000
53368     53368     neimenggu      111.4608       41.0761           76       166     2012      06        16        168              0.000000      18.226227       0.576193       0.216860       0.083000   -9999.000000       0.103300   -9999.000000
53368     53368     neimenggu      111.4608       41.0761           76       166     2012      06        17        169              0.106000      21.499756       0.000000       0.206925       0.087000   -9999.000000       0.112900       0.305000
53368     53368     neimenggu      111.4608       41.0761           76       166     2012      06        18        170              0.000000      23.377930       0.953324       0.193141       0.087000       0.093300       0.081200       0.328000
53368     53368     neimenggu      111.4608       41.0761           76       166     2012      06        19        171              0.000000      23.329834      10.154177       0.194482       0.050000   -9999.000000       0.137900       0.307000
53368     53368     neimenggu      111.4608       41.0761           76       166     2012      06        20        172              0.000000      19.937714       1.819838       0.255040       0.101000       0.211300       0.086900       0.298000
53368     53368     neimenggu      111.4608       41.0761           76       166     2012      06        21        173              0.126000      21.064270       2.335782       0.237769       0.144000   -9999.000000       0.134400   -9999.000000
53368     53368     neimenggu      111.4608       41.0761           76       166     2012      06        22        174              0.000000      20.527374       6.249318       0.239736       0.148000       0.190400       0.149300       0.446000
53368     53368     neimenggu      111.4608       41.0761           76       166     2012      06        23        175              0.000000      21.042603       1.932199       0.259588       0.140500       0.194400       0.083900       0.539000
53368     53368     neimenggu      111.4608       41.0761           76       166     2012      06        24        176              0.000000      22.527771       0.022518       0.249209       0.118000       0.108300       0.101000       0.571000
53368     53368     neimenggu      111.4608       41.0761           76       166     2012      06        25        177              0.000000      21.569611      35.014294       0.236536       0.108000       0.164500       0.122300       0.882000
53368     53368     neimenggu      111.4608       41.0761           76       166     2012      06        26        178              0.000000      22.200775       5.525653       0.350746       0.194000       0.239600       0.275600       0.998000
53368     53368     neimenggu      111.4608       41.0761           76       166     2012      06        27        179              0.000000      19.341919      16.937696       0.314367       0.208000   -9999.000000       0.241900       1.000000
53368     53368     neimenggu      111.4608       41.0761           76       166     2012      06        28        180              0.000000      18.959320       0.585791       0.317741       0.221500       0.474700       0.236100       0.772000
53368     53368     neimenggu      111.4608       41.0761           76       166     2012      06        29        181              0.000000      18.561523       0.070870       0.300875       0.150000       0.157700       0.153000   -9999.000000
53368     53368     neimenggu      111.4608       41.0761           76       166     2012      06        30        182              0.000000      20.585388       0.000000       0.280779       0.126000       0.115800       0.127300   -9999.000000
53368     53368     neimenggu      111.4608       41.0761           76       166     2012      07        01        183              0.000000      22.590424       0.000000       0.266976       0.117500       0.138600       0.117200       0.468000
53368     53368     neimenggu      111.4608       41.0761           76       166     2012      07        02        184              0.000000      22.424927       1.592326       0.255947       0.111000   -9999.000000       0.134300       0.348000
53368     53368     neimenggu      111.4608       41.0761           76       166     2012      07        03        185              0.000000      22.924896       0.874430       0.246748       0.149000       0.033600       0.154900       0.346000
53368     53368     neimenggu      111.4608       41.0761           76       166     2012      07        04        186              0.000000      22.547119       2.495795       0.241833       0.145500   -9999.000000       0.177600       0.481000
53368     53368     neimenggu      111.4608       41.0761           76       166     2012      07        05        187              0.000000      22.586426       0.115080       0.253138       0.117000   -9999.000000       0.122600   -9999.000000
53368     53368     neimenggu      111.4608       41.0761           76       166     2012      07        06        188              0.000000      24.304443       0.354747       0.240110   -9999.000000       0.316400       0.128300       0.492000
53368     53368     neimenggu      111.4608       41.0761           76       166     2012      07        07        189              0.000000      25.603699       3.938357       0.230987   -9999.000000   -9999.000000   -9999.000000       0.759000
53368     53368     neimenggu      111.4608       41.0761           76       166     2012      07        08        190              0.000000      21.997528       0.125437       0.255982       0.122000       0.130300       0.151800       0.730000
53368     53368     neimenggu      111.4608       41.0761           76       166     2012      07        09        191              0.000000      22.862213       0.035891       0.240031       0.113500   -9999.000000       0.160200       0.507000
53368     53368     neimenggu      111.4608       41.0761           76       166     2012      07        10        192              0.000000      23.415131       1.822705       0.230830       0.098000       0.196800       0.159100   -9999.000000
53368     53368     neimenggu      111.4608       41.0761           76       166     2012      07        11        193              0.000000      22.950439       0.192564       0.234863       0.126000       0.107800       0.133700       0.599000
53368     53368     neimenggu      111.4608       41.0761           76       166     2012      07        12        194              0.000000      22.938202       0.171109       0.225106       0.130000       0.141800       0.139500       0.343000
53368     53368     neimenggu      111.4608       41.0761           76       166     2012      07        13        195              0.000000      22.161591       0.605443       0.220252       0.141000   -9999.000000       0.178500       0.521000
53368     53368     neimenggu      111.4608       41.0761           76       166     2012      07        14        196              0.000000      22.054749       2.868873       0.217985       0.169000       0.095200       0.182900       0.604000
53368     53368     neimenggu      111.4608       41.0761           76       166     2012      07        15        197              0.000000      21.127411       0.000000       0.239715       0.138500   -9999.000000       0.168000   -9999.000000
53368     53368     neimenggu      111.4608       41.0761           76       166     2012      07        16        198              0.000000      23.545288       0.000000       0.222739       0.128000       0.220700       0.134600       0.573000
53368     53368     neimenggu      111.4608       41.0761           76       166     2012      07        17        199              0.000000      24.141907       0.289497       0.209013       0.128000       0.034900       0.138300       0.418000
53368     53368     neimenggu      111.4608       41.0761           76       166     2012      07        18        200              0.080000      23.547028       4.876374       0.201201       0.120000       0.039400       0.133500       0.464000
53368     53368     neimenggu      111.4608       41.0761           76       166     2012      07        19        201              0.000000      21.772003       0.082725       0.240670       0.142000       0.033100       0.148800       0.362000
53368     53368     neimenggu      111.4608       41.0761           76       166     2012      07        20        202              0.089200      23.641388      37.620506       0.221638   -9999.000000   -9999.000000       0.209900       0.369000
53368     53368     neimenggu      111.4608       41.0761           76       166     2012      07        21        203              0.162833      22.123444       6.025091       0.325470       0.240000       0.290700       0.227000       1.000000
53368     53368     neimenggu      111.4608       41.0761           76       166     2012      07        22        204              0.139250      17.576385       0.000000       0.311210       0.201000       0.269300       0.183600       0.618000
53368     53368     neimenggu      111.4608       41.0761           76       166     2012      07        23        205              0.128708      20.843964       0.208961       0.281162       0.155000   -9999.000000       0.169700       0.681000
53368     53368     neimenggu      111.4608       41.0761           76       166     2012      07        24        206              0.134542      21.681427      22.080177       0.268805       0.179000       0.145400   -9999.000000       0.401000
53368     53368     neimenggu      111.4608       41.0761           76       166     2012      07        25        207              0.161708      23.269226      10.116160       0.280389       0.246500   -9999.000000       0.271100       1.000000
53368     53368     neimenggu      111.4608       41.0761           76       166     2012      07        26        208              0.140625      21.722565       0.000000       0.317089       0.173000       0.134500       0.222700       0.737000
53368     53368     neimenggu      111.4608       41.0761           76       166     2012      07        27        209              0.157000      23.001434      36.776493       0.289335       0.179000       0.124700       0.164300       0.898000
53368     53368     neimenggu      111.4608       41.0761           76       166     2012      07        28        210              0.157208      22.417572       0.544330       0.316212       0.217000       0.154500       0.215100       0.822000
53368     53368     neimenggu      111.4608       41.0761           76       166     2012      07        29        211              0.142000      22.222565       0.089070       0.308109       0.190000       0.120100       0.215100       0.723000
53368     53368     neimenggu      111.4608       41.0761           76       166     2012      07        30        212              0.156792      21.953766       8.424185       0.290189       0.218000   -9999.000000       0.257800       0.987000
53368     53368     neimenggu      111.4608       41.0761           76       166     2012      07        31        213              0.146375      18.325470       0.000000       0.308236       0.177000   -9999.000000       0.226300       0.785000
53368     53368     neimenggu      111.4608       41.0761           76       166     2012      08        01        214              0.137167      22.953949      14.169438       0.285381       0.168000       0.127000       0.276100       0.843000
53368     53368     neimenggu      111.4608       41.0761           76       166     2012      08        02        215              0.133708      21.137848       6.060148       0.308797       0.206000   -9999.000000       0.217900       0.720000
53368     53368     neimenggu      111.4608       41.0761           76       166     2012      08        03        216              0.156917      21.778900       2.589796       0.303763       0.182000       0.268300       0.236800   -9999.000000
53368     53368     neimenggu      111.4608       41.0761           76       166     2012      08        04        217              0.147208      21.650787       1.306785       0.294392       0.178000   -9999.000000       0.208600       0.955000
53368     53368     neimenggu      111.4608       41.0761           76       166     2012      08        05        218              0.131833      24.168549       0.880545       0.279048       0.162500       0.248600       0.209400       0.519000
53368     53368     neimenggu      111.4608       41.0761           76       166     2012      08        06        219              0.118667      24.048004       1.878902       0.271329       0.154000       0.186000       0.231500       0.674000
53368     53368     neimenggu      111.4608       41.0761           76       166     2012      08        07        220              0.110958      22.385437       2.199109       0.268379       0.200000   -9999.000000   -9999.000000       0.764000
53368     53368     neimenggu      111.4608       41.0761           76       166     2012      08        08        221              0.103583      21.466766       0.000000       0.273782       0.164500       0.131300       0.177600   -9999.000000
53368     53368     neimenggu      111.4608       41.0761           76       166     2012      08        09        222              0.093333      22.277802       0.000000       0.261097       0.146000       0.217200       0.185000       0.645000
53368     53368     neimenggu      111.4608       41.0761           76       166     2012      08        10        223              0.085708      23.043945       8.577048       0.250561       0.139000   -9999.000000       0.272400       0.509000
53368     53368     neimenggu      111.4608       41.0761           76       166     2012      08        11        224              0.156875      22.293091       5.851215       0.259104       0.223000       0.122800       0.255200       1.000000
53368     53368     neimenggu      111.4608       41.0761           76       166     2012      08        12        225              0.136125      17.530029       0.549383       0.296728       0.180000       0.565700       0.233600       0.597000
53368     53368     neimenggu      111.4608       41.0761           76       166     2012      08        13        226              0.120652      20.520447       2.235430       0.272280       0.158500       0.191000       0.191000   -9999.000000
53368     53368     neimenggu      111.4608       41.0761           76       166     2012      08        14        227              0.156458      21.065613       7.144901       0.264995       0.183000       0.317300       0.303100       1.000000
53368     53368     neimenggu      111.4608       41.0761           76       166     2012      08        15        228              0.134833      18.117554       0.000000       0.293116       0.179000   -9999.000000       0.228900       0.531000
53368     53368     neimenggu      111.4608       41.0761           76       166     2012      08        16        229              0.116292      20.131653       0.171859       0.270491       0.159500       0.082200       0.231700       0.720000
53368     53368     neimenggu      111.4608       41.0761           76       166     2012      08        17        230              0.106792      21.435394       3.194499       0.263019       0.151000   -9999.000000       0.256000       0.807000
53368     53368     neimenggu      111.4608       41.0761           76       166     2012      08        18        231              0.098625      21.388916       0.104965       0.269076       0.199000   -9999.000000       0.257600   -9999.000000
53368     53368     neimenggu      111.4608       41.0761           76       166     2012      08        19        232              0.093750      20.606659       0.564141       0.261901       0.172000       0.151200       0.190000       0.746000
53368     53368     neimenggu      111.4608       41.0761           76       166     2012      08        20        233              0.085708      21.398926       0.000000       0.253060   -9999.000000       0.182500       0.179400       0.419000
53368     53368     neimenggu      111.4608       41.0761           76       166     2012      08        21        234              0.090500      16.353088       0.000000       0.248148       0.141500       0.182200       0.166000       0.645000
53368     53368     neimenggu      111.4608       41.0761           76       166     2012      08        22        235              0.093792      15.072693       0.000000       0.242163       0.123000   -9999.000000       0.168100   -9999.000000
53368     53368     neimenggu      111.4608       41.0761           76       166     2012      08        23        236              0.089625      17.754242       0.000000       0.236462       0.138000       0.151700       0.197500       0.505000
53368     53368     neimenggu      111.4608       41.0761           76       166     2012      08        24        237              0.084750      19.447021       0.000000       0.231603       0.168000       0.120700       0.155900       0.616000
53368     53368     neimenggu      111.4608       41.0761           76       166     2012      08        25        238              0.000000      20.426544     408.998291       0.227716       0.168000       0.151100       0.210900       0.522000
53368     53368     neimenggu      111.4608       41.0761           76       166     2012      08        26        239              0.078625      19.005371       0.000000       0.228657       0.145500       0.189400       0.182300       0.505000
53368     53368     neimenggu      111.4608       41.0761           76       166     2012      08        27        240              0.073750      21.383026       0.837318       0.224063       0.174000       0.258200       0.194700       0.721000
53368     53368     neimenggu      111.4608       41.0761           76       166     2012      08        28        241              0.073958      18.770203       0.000000       0.231268       0.148000   -9999.000000       0.124200       0.654000
53368     53368     neimenggu      111.4608       41.0761           76       166     2012      08        29        242              0.071625      21.001526       0.000000       0.222289       0.145500       0.121000       0.159300       0.327000
53368     53368     neimenggu      111.4608       41.0761           76       166     2012      08        30        243              0.067708      22.092590       0.282701       0.213922       0.131000   -9999.000000       0.135600       0.441000
53368     53368     neimenggu      111.4608       41.0761           76       166     2012      08        31        244              0.064542      21.648315       0.681509       0.209430       0.165000       0.080600       0.132500       0.400000
53368     53368     neimenggu      111.4608       41.0761           76       166     2012      09        01        245              0.167792      19.530121      22.954659       0.214164       0.216000   -9999.000000       0.194700   -9999.000000
53368     53368     neimenggu      111.4608       41.0761           76       166     2012      09        02        246              0.161958      12.739563       0.504227       0.304548       0.235000   -9999.000000       0.184300       0.874000
53368     53368     neimenggu      111.4608       41.0761           76       166     2012      09        03        247              0.147625      13.888947       0.111385       0.280454       0.193000       0.263000       0.163700       0.651000
53368     53368     neimenggu      111.4608       41.0761           76       166     2012      09        04        248              0.138583      12.461670       0.000000       0.267765       0.173000   -9999.000000       0.162800       0.686000
53368     53368     neimenggu      111.4608       41.0761           76       166     2012      09        05        249              0.131348      14.349335       0.000000       0.258847       0.150000       0.218000       0.125000       0.489000
53368     53368     neimenggu      111.4608       41.0761           76       166     2012      09        06        250              0.124591      16.402130       0.000000       0.252021       0.151000       0.104100       0.129100   -9999.000000
53368     53368     neimenggu      111.4608       41.0761           76       166     2012      09        07        251              0.116792      17.715912       0.000000       0.246442       0.140500   -9999.000000       0.126300       0.465000
53368     53368     neimenggu      111.4608       41.0761           76       166     2012      09        08        252              0.108542      17.339630       0.000000       0.242019       0.136000       0.215400       0.129500       0.320000
53368     53368     neimenggu      111.4608       41.0761           76       166     2012      09        09        253              0.100958      17.658447       0.000000       0.237503       0.145000       0.105800       0.142900       0.381000
53368     53368     neimenggu      111.4608       41.0761           76       166     2012      09        10        254              0.091667      18.263306       1.173644       0.233546       0.117000       0.192800       0.104600       0.482000
53368     53368     neimenggu      111.4608       41.0761           76       166     2012      09        11        255              0.094417      13.811737       4.456770       0.241327   -9999.000000       0.136000       0.118600   -9999.000000
53368     53368     neimenggu      111.4608       41.0761           76       166     2012      09        12        256              0.101833      10.837067       0.000000       0.265585       0.146500       0.225300       0.114400       0.644000
53368     53368     neimenggu      111.4608       41.0761           76       166     2012      09        13        257              0.133708      10.595734       5.811700       0.257094       0.180000       0.220200       0.144700       0.610000
53368     53368     neimenggu      111.4608       41.0761           76       166     2012      09        14        258              0.139917       9.714813       0.436266       0.278559       0.136000   -9999.000000       0.121100       0.787000
53368     53368     neimenggu      111.4608       41.0761           76       166     2012      09        15        259              0.125917      12.913727       0.000000       0.262800       0.124000   -9999.000000       0.125100       0.324000
53368     53368     neimenggu      111.4608       41.0761           76       166     2012      09        16        260              0.115958      13.601410       0.092593       0.253975       0.121000       0.163700       0.096500   -9999.000000
53368     53368     neimenggu      111.4608       41.0761           76       166     2012      09        17        261              0.113417      14.328400       2.256415       0.250246       0.132500   -9999.000000       0.082800       0.432000
53368     53368     neimenggu      111.4608       41.0761           76       166     2012      09        18        262              0.113083      13.629364       0.448257       0.260868       0.112000       0.172200       0.078100       0.409000
53368     53368     neimenggu      111.4608       41.0761           76       166     2012      09        19        263              0.106375      14.979156       0.000000       0.253591       0.119000   -9999.000000       0.086100       0.531000
53368     53368     neimenggu      111.4608       41.0761           76       166     2012      09        20        264              0.100292      15.223389       5.264702       0.248273       0.134500   -9999.000000       0.108800       0.318000
53368     53368     neimenggu      111.4608       41.0761           76       166     2012      09        21        265              0.099417      15.568970       0.426451       0.254953   -9999.000000       0.202000       0.085500       0.661000
53368     53368     neimenggu      111.4608       41.0761           76       166     2012      09        22        266              0.097125      14.031616       0.853058       0.267421       0.118000   -9999.000000       0.076500       0.444000
53368     53368     neimenggu      111.4608       41.0761           76       166     2012      09        23        267              0.093458      15.554932       1.054732       0.258202       0.115500       0.126600       0.094000       0.388000
53368     53368     neimenggu      111.4608       41.0761           76       166     2012      09        24        268              0.107000      15.381927      11.070807       0.259736       0.152000       0.155100   -9999.000000       0.640000
53368     53368     neimenggu      111.4608       41.0761           76       166     2012      09        25        269              0.151208      13.066437       0.443452       0.277030       0.172000   -9999.000000       0.114500       0.601000
53368     53368     neimenggu      111.4608       41.0761           76       166     2012      09        26        270              0.187000      12.657166      15.824284       0.282200   -9999.000000       0.341400       0.150300       0.906000
53368     53368     neimenggu      111.4608       41.0761           76       166     2012      09        27        271              0.167857      11.565033       0.360069       0.311367   -9999.000000   -9999.000000       0.117900       0.761000
53368     53368     neimenggu      111.4608       41.0761           76       166     2012      09        28        272              0.145400       7.285980       0.115836       0.290941       0.166000   -9999.000000       0.111200       0.499000
53368     53368     neimenggu      111.4608       41.0761           76       166     2012      09        29        273              0.141292       8.208466       0.000000       0.280005       0.136000   -9999.000000       0.104400       0.364000
53368     53368     neimenggu      111.4608       41.0761           76       166     2012      09        30        274              0.136000       9.609161       0.000000       0.272802       0.128000   -9999.000000       0.099800   -9999.000000
53368     53368     neimenggu      111.4608       41.0761           76       166     2012      10        01        275              0.131500      10.816620       0.000000       0.267671       0.113500       0.199500       0.087200       0.359000
53368     53368     neimenggu      111.4608       41.0761           76       166     2012      10        02        276              0.125583      12.414368       0.000000       0.262949   -9999.000000   -9999.000000       0.092700       0.289000
53368     53368     neimenggu      111.4608       41.0761           76       166     2012      10        03        277              0.120208      11.129456       0.000000       0.258592       0.099000   -9999.000000       0.073200       0.383000
53368     53368     neimenggu      111.4608       41.0761           76       166     2012      10        04        278              0.141500      10.265991       3.486578       0.256173   -9999.000000       0.307200       0.110500       0.739000
53368     53368     neimenggu      111.4608       41.0761           76       166     2012      10        05        279              0.152000       7.950836       0.000000       0.271009       0.167000       0.465700       0.124200   -9999.000000
53368     53368     neimenggu      111.4608       41.0761           76       166     2012      10        06        280              0.140417       9.565369       0.036823       0.264480       0.145000       0.149500       0.092300       0.584000
53368     53368     neimenggu      111.4608       41.0761           76       166     2012      10        07        281              0.134083      10.398346       0.000000       0.259144       0.062000       0.323700       0.103200       0.423000
53368     53368     neimenggu      111.4608       41.0761           76       166     2012      10        08        282              0.129125      11.568878       0.252149       0.256757   -9999.000000   -9999.000000       0.093100       0.475000
53368     53368     neimenggu      111.4608       41.0761           76       166     2012      10        09        283              0.121875      10.952301       0.000000       0.256235       0.116000       0.148000       0.071600       0.262000
53368     53368     neimenggu      111.4608       41.0761           76       166     2012      10        10        284              0.118917       6.211273       0.000000       0.253234       0.111000   -9999.000000       0.087900   -9999.000000
53368     53368     neimenggu      111.4608       41.0761           76       166     2012      10        11        285              0.118292       7.328857       0.000000       0.252701       0.106000       0.105700       0.094000       0.309000
53368     53368     neimenggu      111.4608       41.0761           76       166     2012      10        12        286              0.113417       9.259125       0.000000       0.249422   -9999.000000   -9999.000000       0.083300       0.312000
53368     53368     neimenggu      111.4608       41.0761           76       166     2012      10        13        287              0.109125       7.257538       0.000000       0.238465   -9999.000000       0.206200       0.092900       0.275000
53368     53368     neimenggu      111.4608       41.0761           76       166     2012      10        14        288              0.108609       5.018982       0.000000       0.238740       0.098500       0.260200       0.070700       0.335000
53368     53368     neimenggu      111.4608       41.0761           76       166     2012      10        15        289              0.129333       8.658905      13.893641       0.245103       0.093000   -9999.000000       0.073300   -9999.000000
53368     53368     neimenggu      111.4608       41.0761           76       166     2012      10        16        290              0.149333       8.294464       7.819705       0.279046   -9999.000000       0.076900       0.102600       0.656000
53368     53368     neimenggu      111.4608       41.0761           76       166     2012      10        17        291              0.134917       2.736481       2.132769       0.260998       0.149000       0.102300       0.084400       0.336000
53368     53368     neimenggu      111.4608       41.0761           76       166     2012      10        18        292              0.132292       2.615692       0.190071       0.276666   -9999.000000   -9999.000000       0.083700       0.546000
53368     53368     neimenggu      111.4608       41.0761           76       166     2012      10        19        293              0.132750       3.899200       0.260519       0.277137       0.106000       0.202900       0.087400       0.397000
53368     53368     neimenggu      111.4608       41.0761           76       166     2012      10        20        294              0.134875       5.920654       1.635589       0.274683       0.100000       0.149000       0.080200       0.310000
53368     53368     neimenggu      111.4608       41.0761           76       166     2012      10        21        295              0.181500       7.390503       8.030891       0.274547   -9999.000000   -9999.000000       0.104200       0.609000
53368     53368     neimenggu      111.4608       41.0761           76       166     2012      10        22        296              0.157875       2.312653       0.000000       0.282847   -9999.000000       0.177600       0.113000       0.410000
53368     53368     neimenggu      111.4608       41.0761           76       166     2012      10        23        297              0.149375       3.585938       0.000000       0.271342   -9999.000000   -9999.000000       0.077100       0.451000
53368     53368     neimenggu      111.4608       41.0761           76       166     2012      10        24        298              0.144458       5.337189       0.000000       0.275128   -9999.000000       0.067000       0.084300       0.393000
53368     53368     neimenggu      111.4608       41.0761           76       166     2012      10        25        299              0.000000       5.872131       0.000000       0.271583       0.094000   -9999.000000       0.073100       0.400000
53368     53368     neimenggu      111.4608       41.0761           76       166     2012      10        26        300              0.138333       6.693939       0.000000       0.269274       0.093000   -9999.000000       0.074600       0.373000
53368     53368     neimenggu      111.4608       41.0761           76       166     2012      10        27        301              0.135042       5.266357       0.000000       0.267670       0.105000       0.088800       0.080200       0.241000
53368     53368     neimenggu      111.4608       41.0761           76       166     2012      10        28        302              0.000000       4.197205       0.000000       0.254279       0.119000   -9999.000000       0.080200       0.286000
53368     53368     neimenggu      111.4608       41.0761           76       166     2012      10        29        303              0.123542       5.351959       0.000000       0.254837   -9999.000000       0.034200       0.065300   -9999.000000
53368     53368     neimenggu      111.4608       41.0761           76       166     2012      10        30        304              0.111167       1.190002       0.000000       0.202886   -9999.000000   -9999.000000       0.072600       0.148000
53368     53368     neimenggu      111.4608       41.0761           76       166     2012      10        31        305              0.116167       0.501648       0.000000       0.186190   -9999.000000   -9999.000000       0.061900       0.171000
53368     53368     neimenggu      111.4608       41.0761           76       166     2012      11        01        306              0.122208       1.477509       0.000000       0.203110       0.086000       0.057800       0.060900       0.294000
53368     53368     neimenggu      111.4608       41.0761           76       166     2012      11        02        307              0.127042       2.269165       0.753565       0.230573       0.098000   -9999.000000       0.068100       0.263000
53368     53368     neimenggu      111.4608       41.0761           76       166     2012      11        03        308              0.125583       4.363007       0.000000       0.234116   -9999.000000   -9999.000000       0.068500   -9999.000000
53368     53368     neimenggu      111.4608       41.0761           76       166     2012      11        04        309              0.134917      -5.491943       0.000000       0.116286   -9999.000000       0.049700       0.067700       0.070000
53368     53368     neimenggu      111.4608       41.0761           76       166     2012      11        05        310              0.137250      -7.904114       0.147454       0.101508   -9999.000000       0.223700       0.059000       0.146000
53368     53368     neimenggu      111.4608       41.0761           76       166     2012      11        06        311              0.135250      -3.797211       0.000000       0.119954       0.109000       0.047800       0.051500       0.209000
53368     53368     neimenggu      111.4608       41.0761           76       166     2012      11        07        312              0.129750      -1.823273       0.000000       0.138702   -9999.000000       0.075300       0.054300       0.208000
53368     53368     neimenggu      111.4608       41.0761           76       166     2012      11        08        313              0.125083      -1.644318       0.000000       0.143916   -9999.000000       0.046900   -9999.000000   -9999.000000
53368     53368     neimenggu      111.4608       41.0761           76       166     2012      11        09        314              0.127542      -0.249207       0.491443       0.161592   -9999.000000   -9999.000000       0.062100       0.239000
53368     53368     neimenggu      111.4608       41.0761           76       166     2012      11        10        315              0.140000      -0.181458       0.000000       0.174263   -9999.000000       0.134700       0.058900       0.098000
53368     53368     neimenggu      111.4608       41.0761           76       166     2012      11        11        316              0.143292      -6.785919       0.000000       0.106880   -9999.000000       0.056700       0.044300       0.171000
53368     53368     neimenggu      111.4608       41.0761           76       166     2012      11        12        317              0.138417      -8.039490       0.000000       0.100716   -9999.000000   -9999.000000       0.034700       0.107000
53368     53368     neimenggu      111.4608       41.0761           76       166     2012      11        13        318              0.000000      -7.878510       0.000000       0.100293   -9999.000000       0.260900       0.040500   -9999.000000
53368     53368     neimenggu      111.4608       41.0761           76       166     2012      11        14        319              0.126083      -8.727234       0.145628       0.098772   -9999.000000       0.032500       0.045400       0.146000
53368     53368     neimenggu      111.4608       41.0761           76       166     2012      11        15        320              0.123833      -5.408722       0.231021       0.104622   -9999.000000   -9999.000000       0.043300       0.067000
53368     53368     neimenggu      111.4608       41.0761           76       166     2012      11        16        321              0.125000      -4.432129       0.000000       0.111944   -9999.000000   -9999.000000       0.045900       0.114000
53368     53368     neimenggu      111.4608       41.0761           76       166     2012      11        17        322              0.000000      -6.668488       0.281623       0.102868   -9999.000000   -9999.000000       0.037700       0.138000
53368     53368     neimenggu      111.4608       41.0761           76       166     2012      11        18        323              0.121458      -4.415771       0.000000       0.110443   -9999.000000   -9999.000000       0.040900       0.273000
53368     53368     neimenggu      111.4608       41.0761           76       166     2012      11        19        324              0.114250      -6.838562       0.000000       0.103585   -9999.000000       0.041500       0.034000       0.126000
53368     53368     neimenggu      111.4608       41.0761           76       166     2012      11        20        325              0.107917      -6.493927       0.000000       0.101323   -9999.000000   -9999.000000       0.038500       0.120000
53368     53368     neimenggu      111.4608       41.0761           76       166     2012      11        21        326              0.112458      -4.093079       0.000000       0.112217   -9999.000000       0.051700       0.037900       0.182000
53368     53368     neimenggu      111.4608       41.0761           76       166     2012      11        22        327              0.114917      -3.216431       0.000000       0.124170   -9999.000000   -9999.000000       0.030400       0.147000
53368     53368     neimenggu      111.4608       41.0761           76       166     2012      11        23        328              0.100875      -9.051788       0.000000       0.101582   -9999.000000       0.266600       0.019000       0.155000
53368     53368     neimenggu      111.4608       41.0761           76       166     2012      11        24        329              0.092250      -8.939941       0.000000       0.097231   -9999.000000       0.024800       0.027900       0.106000
53368     53368     neimenggu      111.4608       41.0761           76       166     2012      11        25        330              0.089708      -6.929688       0.000000       0.098090   -9999.000000       0.083400       0.033700       0.010000
53368     53368     neimenggu      111.4608       41.0761           76       166     2012      11        26        331              0.083833      -8.936279       0.000000       0.097376   -9999.000000       0.044200   -9999.000000       0.109000
53368     53368     neimenggu      111.4608       41.0761           76       166     2012      11        27        332              0.083083      -7.435028       0.000000       0.097583   -9999.000000       0.055400       0.038800   -9999.000000
53368     53368     neimenggu      111.4608       41.0761           76       166     2012      11        28        333              0.077625      -8.248505       0.000000       0.097291   -9999.000000       0.248600       0.023500       0.247000
53368     53368     neimenggu      111.4608       41.0761           76       166     2012      11        29        334              0.071333     -11.528229       0.000000       0.095835   -9999.000000       0.054700       0.026300       0.082000
53368     53368     neimenggu      111.4608       41.0761           76       166     2012      11        30        335              0.069625     -11.953278       0.000000       0.094915   -9999.000000   -9999.000000       0.030400       0.084000
53368     53368     neimenggu      111.4608       41.0761           76       166     2012      12        01        336              0.070000      -9.465302       0.000000       0.094963   -9999.000000   -9999.000000       0.030200       0.047000
53368     53368     neimenggu      111.4608       41.0761           76       166     2012      12        02        337              0.069875      -7.439453       0.000000       0.096451   -9999.000000       0.070200       0.032700   -9999.000000
53368     53368     neimenggu      111.4608       41.0761           76       166     2012      12        03        338              0.067708      -8.260651       0.000000       0.096748   -9999.000000       0.291200       0.030400       0.110000
53368     53368     neimenggu      111.4608       41.0761           76       166     2012      12        04        339              0.065292     -11.613037       0.000000       0.094606   -9999.000000       0.037000       0.018600       0.045000
53368     53368     neimenggu      111.4608       41.0761           76       166     2012      12        05        340              0.064625     -12.006012       0.000000       0.094534   -9999.000000       0.110600       0.023500       0.099000
53368     53368     neimenggu      111.4608       41.0761           76       166     2012      12        06        341              0.064083     -14.097260       0.000000       0.094003   -9999.000000       0.124500       0.022600       0.085000
53368     53368     neimenggu      111.4608       41.0761           76       166     2012      12        07        342              0.063792     -12.731812       0.000000       0.094348   -9999.000000   -9999.000000       0.019100   -9999.000000
53368     53368     neimenggu      111.4608       41.0761           76       166     2012      12        08        343              0.061083     -16.402832       0.000000       0.092736   -9999.000000   -9999.000000       0.026800       0.073000
53368     53368     neimenggu      111.4608       41.0761           76       166     2012      12        09        344              0.060542     -17.907104       0.000000       0.090748   -9999.000000   -9999.000000       0.013600       0.015000
53368     53368     neimenggu      111.4608       41.0761           76       166     2012      12        10        345              0.060250     -13.900421       0.000000       0.091391   -9999.000000   -9999.000000       0.021000       0.132000
53368     53368     neimenggu      111.4608       41.0761           76       166     2012      12        11        346              0.060000     -13.959595       0.000000       0.091891   -9999.000000   -9999.000000       0.022200       0.058000
53368     53368     neimenggu      111.4608       41.0761           76       166     2012      12        12        347              0.060708     -10.722595       0.000000       0.092216   -9999.000000   -9999.000000       0.028600   -9999.000000
53368     53368     neimenggu      111.4608       41.0761           76       166     2012      12        13        348              0.060708      -8.675720       0.000000       0.093368   -9999.000000   -9999.000000       0.022700       0.113000
53368     53368     neimenggu      111.4608       41.0761           76       166     2012      12        14        349              0.062333      -6.744385       0.000000       0.094997   -9999.000000   -9999.000000       0.018700       0.053000
53368     53368     neimenggu      111.4608       41.0761           76       166     2012      12        15        350              0.000000      -5.867554       0.000000       0.096167   -9999.000000   -9999.000000       0.014200       0.130000
53368     53368     neimenggu      111.4608       41.0761           76       166     2012      12        16        351              0.061000      -6.626801       0.000000       0.097651   -9999.000000   -9999.000000       0.010000       0.130000
53368     53368     neimenggu      111.4608       41.0761           76       166     2012      12        17        352              0.060167      -9.729462       0.000000       0.094432   -9999.000000       0.067400       0.010000       0.041000
53368     53368     neimenggu      111.4608       41.0761           76       166     2012      12        18        353              0.059333     -15.557312       0.000000       0.092139   -9999.000000       0.028100       0.010000       0.089000
53368     53368     neimenggu      111.4608       41.0761           76       166     2012      12        19        354              0.059391     -12.275452       0.000000       0.092168   -9999.000000   -9999.000000       0.010000       0.006000
53368     53368     neimenggu      111.4608       41.0761           76       166     2012      12        20        355              0.000000     -10.505981       0.000000       0.093168   -9999.000000       0.060300       0.010000       0.071000
53368     53368     neimenggu      111.4608       41.0761           76       166     2012      12        21        356              0.059708     -11.376709       0.000000       0.093072   -9999.000000   -9999.000000       0.010000       0.041000
53368     53368     neimenggu      111.4608       41.0761           76       166     2012      12        22        357              0.058792     -15.846558       0.000000       0.091774   -9999.000000   -9999.000000       0.013600       0.094000
53368     53368     neimenggu      111.4608       41.0761           76       166     2012      12        23        358              0.057500     -20.408035       0.000000       0.090181   -9999.000000   -9999.000000   -9999.000000       0.059000
53368     53368     neimenggu      111.4608       41.0761           76       166     2012      12        24        359              0.056000     -19.652130       0.000000       0.089455   -9999.000000   -9999.000000       0.017400       0.024000
53368     53368     neimenggu      111.4608       41.0761           76       166     2012      12        25        360              0.055000     -20.334534       0.000000       0.089436   -9999.000000   -9999.000000       0.017500       0.059000
53368     53368     neimenggu      111.4608       41.0761           76       166     2012      12        26        361              0.000000     -16.884766       0.000000       0.089370   -9999.000000   -9999.000000       0.010000   -9999.000000
53368     53368     neimenggu      111.4608       41.0761           76       166     2012      12        27        362              0.055600     -12.928955       0.000000       0.090343   -9999.000000   -9999.000000       0.010000       0.084000
53368     53368     neimenggu      111.4608       41.0761           76       166     2012      12        28        363              0.000000     -10.635590       0.000000       0.091263   -9999.000000   -9999.000000       0.012400       0.020000
53368     53368     neimenggu      111.4608       41.0761           76       166     2012      12        29        364              0.000000     -14.434845       0.000000       0.090724   -9999.000000   -9999.000000       0.020100       0.069000
53368     53368     neimenggu      111.4608       41.0761           76       166     2012      12        30        365              0.000000     -17.218735       0.000000       0.089868   -9999.000000   -9999.000000       0.012100       0.125000
53368     53368     neimenggu      111.4608       41.0761           76       166     2012      12        31        366              0.055000     -15.472473       0.000000       0.090121   -9999.000000   -9999.000000       0.010000   -9999.000000
