# Supplementary material for: Research on Fusing Multisatellite Soil Moisture Data Based on Bayesian Model Averaging
Source: Hindawi journal article supplement (doi:10.1155/2018/9310838), 2018-06-25
Supplement: f1 [file 9310838.f1.zip › 2012_sm00-10cm_daily_ZDB_ZHY_53378_366days_allin.txt]

53378     53378     neimenggu      112.6167       41.2833           75       170     2012      01        01        001              0.000000   -9999.000000       0.000000   -9999.000000   -9999.000000   -9999.000000       0.044100   -9999.000000
53378     53378     neimenggu      112.6167       41.2833           75       170     2012      01        02        002              0.000000     -11.895538       0.000000       0.090547   -9999.000000   -9999.000000       0.045100       0.058000
53378     53378     neimenggu      112.6167       41.2833           75       170     2012      01        03        003              0.000000     -15.909760       0.000000       0.090051   -9999.000000   -9999.000000       0.053000       0.069000
53378     53378     neimenggu      112.6167       41.2833           75       170     2012      01        04        004              0.000000     -18.031708       0.000000       0.089447   -9999.000000   -9999.000000       0.053400   -9999.000000
53378     53378     neimenggu      112.6167       41.2833           75       170     2012      01        05        005              0.000000     -15.381134       0.000000       0.089640   -9999.000000   -9999.000000       0.054800       0.015000
53378     53378     neimenggu      112.6167       41.2833           75       170     2012      01        06        006              0.000000     -13.963257       0.000000       0.089716   -9999.000000   -9999.000000       0.042000       0.013000
53378     53378     neimenggu      112.6167       41.2833           75       170     2012      01        07        007              0.000000     -12.492218       0.000000       0.089762   -9999.000000   -9999.000000       0.048400       0.029000
53378     53378     neimenggu      112.6167       41.2833           75       170     2012      01        08        008              0.000000     -12.659912       0.000000       0.089845   -9999.000000   -9999.000000       0.049400       0.043000
53378     53378     neimenggu      112.6167       41.2833           75       170     2012      01        09        009              0.000000     -12.669342       0.000000       0.089763   -9999.000000   -9999.000000   -9999.000000       0.015000
53378     53378     neimenggu      112.6167       41.2833           75       170     2012      01        10        010              0.000000     -12.827118       0.000000       0.089723   -9999.000000   -9999.000000       0.056000       0.024000
53378     53378     neimenggu      112.6167       41.2833           75       170     2012      01        11        011              0.000000     -15.145325       0.000000       0.089274   -9999.000000   -9999.000000       0.057100       0.053000
53378     53378     neimenggu      112.6167       41.2833           75       170     2012      01        12        012              0.000000     -12.944092       0.000000       0.089521   -9999.000000   -9999.000000       0.048400       0.111000
53378     53378     neimenggu      112.6167       41.2833           75       170     2012      01        13        013              0.000000     -12.142609       0.000000       0.089692   -9999.000000   -9999.000000       0.048800       0.048000
53378     53378     neimenggu      112.6167       41.2833           75       170     2012      01        14        014              0.000000     -12.174896       0.000000       0.089462   -9999.000000   -9999.000000       0.047000       0.044000
53378     53378     neimenggu      112.6167       41.2833           75       170     2012      01        15        015              0.000000     -11.110229       0.000000       0.089487   -9999.000000   -9999.000000       0.054400       0.082000
53378     53378     neimenggu      112.6167       41.2833           75       170     2012      01        16        016              0.000000     -10.214111       0.000000       0.089677   -9999.000000   -9999.000000       0.054900       0.063000
53378     53378     neimenggu      112.6167       41.2833           75       170     2012      01        17        017              0.000000      -9.483307       0.000000       0.089827   -9999.000000   -9999.000000       0.044800       0.100000
53378     53378     neimenggu      112.6167       41.2833           75       170     2012      01        18        018              0.000000     -10.535858       0.000000       0.089427   -9999.000000   -9999.000000       0.044800   -9999.000000
53378     53378     neimenggu      112.6167       41.2833           75       170     2012      01        19        019              0.000000      -9.522644       0.000000       0.089455   -9999.000000   -9999.000000       0.044800       0.019000
53378     53378     neimenggu      112.6167       41.2833           75       170     2012      01        20        020              0.000000     -13.488831       0.000000       0.088689   -9999.000000   -9999.000000       0.058300       0.112000
53378     53378     neimenggu      112.6167       41.2833           75       170     2012      01        21        021              0.000000     -17.656265       0.000000       0.087501   -9999.000000   -9999.000000       0.056600       0.090000
53378     53378     neimenggu      112.6167       41.2833           75       170     2012      01        22        022              0.000000     -18.793716       0.000000       0.087080   -9999.000000   -9999.000000       0.059200       0.121000
53378     53378     neimenggu      112.6167       41.2833           75       170     2012      01        23        023              0.000000     -18.262436       0.000000       0.087235   -9999.000000   -9999.000000       0.047200   -9999.000000
53378     53378     neimenggu      112.6167       41.2833           75       170     2012      01        24        024              0.000000     -17.629257       0.000000       0.087387   -9999.000000   -9999.000000   -9999.000000       0.053000
53378     53378     neimenggu      112.6167       41.2833           75       170     2012      01        25        025              0.000000     -15.857330       0.000000       0.087779   -9999.000000   -9999.000000       0.055400       0.117000
53378     53378     neimenggu      112.6167       41.2833           75       170     2012      01        26        026              0.000000     -13.893921       0.000000       0.088261   -9999.000000   -9999.000000       0.060500       0.071000
53378     53378     neimenggu      112.6167       41.2833           75       170     2012      01        27        027              0.000000     -13.860626       0.000000       0.088043   -9999.000000   -9999.000000       0.058300       0.155000
53378     53378     neimenggu      112.6167       41.2833           75       170     2012      01        28        028              0.000000     -11.989594       0.000000       0.088007   -9999.000000   -9999.000000       0.063000   -9999.000000
53378     53378     neimenggu      112.6167       41.2833           75       170     2012      01        29        029              0.000000     -15.097443       0.000000       0.087359   -9999.000000   -9999.000000       0.051700       0.071000
53378     53378     neimenggu      112.6167       41.2833           75       170     2012      01        30        030              0.000000     -14.059662       0.000000       0.087054   -9999.000000   -9999.000000       0.050300       0.095000
53378     53378     neimenggu      112.6167       41.2833           75       170     2012      01        31        031              0.000000     -12.729767       0.000000       0.087238   -9999.000000   -9999.000000       0.046000       0.029000
53378     53378     neimenggu      112.6167       41.2833           75       170     2012      02        01        032              0.000000     -16.699371       0.000000       0.086439   -9999.000000   -9999.000000       0.061900       0.144000
53378     53378     neimenggu      112.6167       41.2833           75       170     2012      02        02        033              0.000000     -18.065643       0.000000       0.086087   -9999.000000   -9999.000000       0.061100   -9999.000000
53378     53378     neimenggu      112.6167       41.2833           75       170     2012      02        03        034              0.000000     -15.182678       0.000000       0.086612   -9999.000000   -9999.000000       0.048100       0.062000
53378     53378     neimenggu      112.6167       41.2833           75       170     2012      02        04        035              0.000000     -14.660675       0.000000       0.086698   -9999.000000   -9999.000000       0.048800       0.099000
53378     53378     neimenggu      112.6167       41.2833           75       170     2012      02        05        036              0.000000     -11.336060       0.000000       0.086962   -9999.000000   -9999.000000       0.049300       0.046000
53378     53378     neimenggu      112.6167       41.2833           75       170     2012      02        06        037              0.000000     -12.121307       0.000000       0.086742   -9999.000000   -9999.000000       0.064700       0.062000
53378     53378     neimenggu      112.6167       41.2833           75       170     2012      02        07        038              0.000000     -18.932068       0.000000       0.085535   -9999.000000   -9999.000000       0.064500       0.045000
53378     53378     neimenggu      112.6167       41.2833           75       170     2012      02        08        039              0.000000     -17.848785       0.000000       0.085884   -9999.000000   -9999.000000       0.057400       0.065000
53378     53378     neimenggu      112.6167       41.2833           75       170     2012      02        09        040              0.000000     -15.045837       0.000000       0.086490   -9999.000000   -9999.000000       0.056000       0.104000
53378     53378     neimenggu      112.6167       41.2833           75       170     2012      02        10        041              0.000000     -14.246948       0.000000       0.086437   -9999.000000   -9999.000000       0.055900       0.096000
53378     53378     neimenggu      112.6167       41.2833           75       170     2012      02        11        042              0.000000     -12.284363       0.000000       0.086459   -9999.000000   -9999.000000       0.050100       0.022000
53378     53378     neimenggu      112.6167       41.2833           75       170     2012      02        12        043              0.000000      -9.199951       0.000000       0.087202   -9999.000000   -9999.000000   -9999.000000       0.051000
53378     53378     neimenggu      112.6167       41.2833           75       170     2012      02        13        044              0.000000      -7.311401       0.000000       0.094660   -9999.000000   -9999.000000   -9999.000000       0.068000
53378     53378     neimenggu      112.6167       41.2833           75       170     2012      02        14        045              0.000000      -8.870483       0.000000       0.092198   -9999.000000   -9999.000000       0.064300       0.078000
53378     53378     neimenggu      112.6167       41.2833           75       170     2012      02        15        046              0.000000     -10.701874       0.000000       0.087438   -9999.000000   -9999.000000       0.056000       0.120000
53378     53378     neimenggu      112.6167       41.2833           75       170     2012      02        16        047              0.000000     -12.570709       0.000000       0.086884   -9999.000000   -9999.000000       0.061200   -9999.000000
53378     53378     neimenggu      112.6167       41.2833           75       170     2012      02        17        048              0.000000     -15.175690       0.000000       0.086588   -9999.000000   -9999.000000       0.056400       0.076000
53378     53378     neimenggu      112.6167       41.2833           75       170     2012      02        18        049              0.000000     -14.674286       0.000000       0.086420   -9999.000000   -9999.000000       0.063500       0.100000
53378     53378     neimenggu      112.6167       41.2833           75       170     2012      02        19        050              0.000000     -12.104614       0.000000       0.086827   -9999.000000   -9999.000000       0.067000       0.102000
53378     53378     neimenggu      112.6167       41.2833           75       170     2012      02        20        051              0.000000      -9.286041       0.000000       0.087394   -9999.000000   -9999.000000       0.052200       0.210000
53378     53378     neimenggu      112.6167       41.2833           75       170     2012      02        21        052              0.000000      -5.681305       0.000000       0.110760   -9999.000000   -9999.000000   -9999.000000   -9999.000000
53378     53378     neimenggu      112.6167       41.2833           75       170     2012      02        22        053              0.000000      -1.058990       0.000000       0.144691   -9999.000000   -9999.000000       0.056300       0.114000
53378     53378     neimenggu      112.6167       41.2833           75       170     2012      02        23        054              0.000000      -7.356293       0.000000       0.110270   -9999.000000   -9999.000000       0.056800       0.122000
53378     53378     neimenggu      112.6167       41.2833           75       170     2012      02        24        055              0.000000      -4.289398       0.000000       0.123613   -9999.000000   -9999.000000       0.060900       0.072000
53378     53378     neimenggu      112.6167       41.2833           75       170     2012      02        25        056              0.000000      -9.560944       0.000000       0.099077   -9999.000000   -9999.000000       0.063600       0.178000
53378     53378     neimenggu      112.6167       41.2833           75       170     2012      02        26        057              0.000000      -8.887360       0.000000       0.096764   -9999.000000   -9999.000000       0.052300   -9999.000000
53378     53378     neimenggu      112.6167       41.2833           75       170     2012      02        27        058              0.000000      -6.661926       0.000000       0.112364   -9999.000000   -9999.000000   -9999.000000       0.109000
53378     53378     neimenggu      112.6167       41.2833           75       170     2012      02        28        059              0.000000      -4.768585       0.000000       0.120087   -9999.000000   -9999.000000       0.057000       0.136000
53378     53378     neimenggu      112.6167       41.2833           75       170     2012      02        29        060              0.000000   -9999.000000       0.000000   -9999.000000   -9999.000000   -9999.000000   -9999.000000   -9999.000000
53378     53378     neimenggu      112.6167       41.2833           75       170     2012      03        01        061              0.000000      -2.627045       0.000000       0.139322   -9999.000000   -9999.000000       0.058900       0.141000
53378     53378     neimenggu      112.6167       41.2833           75       170     2012      03        02        062              0.000000      -5.567719       0.000000       0.117451   -9999.000000   -9999.000000       0.064100   -9999.000000
53378     53378     neimenggu      112.6167       41.2833           75       170     2012      03        03        063              0.000000      -1.747650       0.000000       0.141733   -9999.000000   -9999.000000       0.062700       0.163000
53378     53378     neimenggu      112.6167       41.2833           75       170     2012      03        04        064              0.000000      -2.009521       0.000000       0.136085   -9999.000000   -9999.000000       0.062900       0.098000
53378     53378     neimenggu      112.6167       41.2833           75       170     2012      03        05        065              0.000000      -2.468719       0.000000       0.135446   -9999.000000   -9999.000000       0.056700       0.084000
53378     53378     neimenggu      112.6167       41.2833           75       170     2012      03        06        066              0.000000      -8.825470       0.000000       0.101763   -9999.000000   -9999.000000       0.060300       0.061000
53378     53378     neimenggu      112.6167       41.2833           75       170     2012      03        07        067              0.000000      -7.304504       0.000000       0.099891   -9999.000000   -9999.000000       0.063400       0.080000
53378     53378     neimenggu      112.6167       41.2833           75       170     2012      03        08        068              0.000000      -9.693481       0.000000       0.096243   -9999.000000   -9999.000000       0.056300       0.116000
53378     53378     neimenggu      112.6167       41.2833           75       170     2012      03        09        069              0.000000      -7.578918       0.000000       0.102678   -9999.000000   -9999.000000       0.062300       0.106000
53378     53378     neimenggu      112.6167       41.2833           75       170     2012      03        10        070              0.000000      -6.481812       0.000000       0.114062   -9999.000000   -9999.000000       0.055800       0.197000
53378     53378     neimenggu      112.6167       41.2833           75       170     2012      03        11        071              0.000000     -12.402252       0.000000       0.095209   -9999.000000   -9999.000000       0.064500       0.086000
53378     53378     neimenggu      112.6167       41.2833           75       170     2012      03        12        072              0.000000      -8.055389       0.000000       0.100141   -9999.000000   -9999.000000       0.065200       0.093000
53378     53378     neimenggu      112.6167       41.2833           75       170     2012      03        13        073              0.000000      -5.306671       0.000000       0.113229   -9999.000000   -9999.000000       0.066800       0.123000
53378     53378     neimenggu      112.6167       41.2833           75       170     2012      03        14        074              0.000000      -3.818329       0.000000       0.134737   -9999.000000   -9999.000000   -9999.000000       0.198000
53378     53378     neimenggu      112.6167       41.2833           75       170     2012      03        15        075              0.000000       0.079437       0.000000       0.154589   -9999.000000       0.056400       0.073000       0.108000
53378     53378     neimenggu      112.6167       41.2833           75       170     2012      03        16        076              0.000000       0.735199       0.000000       0.169294   -9999.000000   -9999.000000       0.075700   -9999.000000
53378     53378     neimenggu      112.6167       41.2833           75       170     2012      03        17        077              0.000000       2.090271       0.000000       0.178105   -9999.000000   -9999.000000       0.063100       0.210000
53378     53378     neimenggu      112.6167       41.2833           75       170     2012      03        18        078              0.000000      -1.084534       0.000000       0.157715   -9999.000000       0.052000       0.067200       0.165000
53378     53378     neimenggu      112.6167       41.2833           75       170     2012      03        19        079              0.000000      -1.135223       0.000000       0.146612   -9999.000000   -9999.000000       0.065400       0.194000
53378     53378     neimenggu      112.6167       41.2833           75       170     2012      03        20        080              0.000000       0.442902       0.237461       0.161446       0.085000       0.027800       0.075100       0.203000
53378     53378     neimenggu      112.6167       41.2833           75       170     2012      03        21        081              0.000000       1.716522       0.000000       0.169463   -9999.000000   -9999.000000       0.078800   -9999.000000
53378     53378     neimenggu      112.6167       41.2833           75       170     2012      03        22        082              0.000000       1.387756       0.000000       0.170527   -9999.000000   -9999.000000   -9999.000000       0.243000
53378     53378     neimenggu      112.6167       41.2833           75       170     2012      03        23        083              0.000000       0.618683       0.000000       0.167782   -9999.000000   -9999.000000       0.066500       0.184000
53378     53378     neimenggu      112.6167       41.2833           75       170     2012      03        24        084              0.000000      -2.187256       0.000000       0.134885   -9999.000000   -9999.000000   -9999.000000       0.228000
53378     53378     neimenggu      112.6167       41.2833           75       170     2012      03        25        085              0.000000       0.147156       0.000000       0.157243       0.092000       0.082300       0.079800       0.225000
53378     53378     neimenggu      112.6167       41.2833           75       170     2012      03        26        086              0.000000       2.653961       0.000000       0.173575       0.089000   -9999.000000       0.084200   -9999.000000
53378     53378     neimenggu      112.6167       41.2833           75       170     2012      03        27        087              0.000000       3.696533       0.000000       0.179440       0.099000   -9999.000000       0.083200       0.321000
53378     53378     neimenggu      112.6167       41.2833           75       170     2012      03        28        088              0.085000       4.621643       0.778623       0.181254       0.100000   -9999.000000       0.096800       0.705000
53378     53378     neimenggu      112.6167       41.2833           75       170     2012      03        29        089              0.000000       5.520538       0.000000       0.202745   -9999.000000   -9999.000000       0.074600       0.413000
53378     53378     neimenggu      112.6167       41.2833           75       170     2012      03        30        090              0.060000       1.540558       0.000000       0.166036   -9999.000000       0.019600       0.081500       0.136000
53378     53378     neimenggu      112.6167       41.2833           75       170     2012      03        31        091              0.000000      -0.747772       0.162043       0.144554       0.088000   -9999.000000       0.084100   -9999.000000
53378     53378     neimenggu      112.6167       41.2833           75       170     2012      04        01        092              0.000000       3.362061       0.000000       0.177890       0.103000   -9999.000000       0.082600       0.143000
53378     53378     neimenggu      112.6167       41.2833           75       170     2012      04        02        093              0.080000       5.126709       0.000000       0.186291       0.097000       0.034600       0.076100       0.141000
53378     53378     neimenggu      112.6167       41.2833           75       170     2012      04        03        094              0.000000       0.708710       0.205925       0.157006   -9999.000000   -9999.000000       0.078500       0.085000
53378     53378     neimenggu      112.6167       41.2833           75       170     2012      04        04        095              0.000000       2.933685       0.000000       0.173799   -9999.000000       0.030400       0.080500       0.134000
53378     53378     neimenggu      112.6167       41.2833           75       170     2012      04        05        096              0.000000       3.289215       0.000000       0.173308       0.086000       0.114500       0.084300       0.045000
53378     53378     neimenggu      112.6167       41.2833           75       170     2012      04        06        097              0.000000       3.840027       0.000000       0.179231       0.086000   -9999.000000       0.070200       0.131000
53378     53378     neimenggu      112.6167       41.2833           75       170     2012      04        07        098              0.000000       6.293304       0.000000       0.187857       0.080000       0.015800       0.074700       0.147000
53378     53378     neimenggu      112.6167       41.2833           75       170     2012      04        08        099              0.000000       7.211639       0.000000       0.179652       0.086000       0.177200       0.083600       0.242000
53378     53378     neimenggu      112.6167       41.2833           75       170     2012      04        09        100              0.000000       8.411926       0.000000       0.185940       0.075000       0.009300       0.081100       0.165000
53378     53378     neimenggu      112.6167       41.2833           75       170     2012      04        10        101              0.000000      11.560150       0.000000       0.183668       0.077000       0.033400       0.081200       0.072000
53378     53378     neimenggu      112.6167       41.2833           75       170     2012      04        11        102              0.000000       6.040588       0.000000       0.168128       0.078000   -9999.000000       0.067400       0.020000
53378     53378     neimenggu      112.6167       41.2833           75       170     2012      04        12        103              0.000000       4.509491       0.000000       0.170856       0.085000       0.109100       0.068300       0.237000
53378     53378     neimenggu      112.6167       41.2833           75       170     2012      04        13        104              0.000000       7.656525       0.000000       0.179274       0.074000   -9999.000000       0.070300       0.166000
53378     53378     neimenggu      112.6167       41.2833           75       170     2012      04        14        105              0.000000       9.530548       2.172756       0.177944   -9999.000000   -9999.000000       0.074300   -9999.000000
53378     53378     neimenggu      112.6167       41.2833           75       170     2012      04        15        106              0.000000      10.528625       0.000000       0.174309   -9999.000000       0.036400       0.074100       0.064000
53378     53378     neimenggu      112.6167       41.2833           75       170     2012      04        16        107              0.000000       7.252930       0.000000       0.166170       0.073000   -9999.000000       0.079600       0.174000
53378     53378     neimenggu      112.6167       41.2833           75       170     2012      04        17        108              0.000000       9.710297       0.000000       0.171223       0.073000   -9999.000000       0.065800       0.143000
53378     53378     neimenggu      112.6167       41.2833           75       170     2012      04        18        109              0.060000      12.678986       0.000000       0.167020       0.087000   -9999.000000   -9999.000000       0.187000
53378     53378     neimenggu      112.6167       41.2833           75       170     2012      04        19        110              0.059000      10.999207       0.000000       0.167364   -9999.000000   -9999.000000       0.066600   -9999.000000
53378     53378     neimenggu      112.6167       41.2833           75       170     2012      04        20        111              0.000000      10.060638       0.624429       0.165063   -9999.000000       0.023600       0.082100       0.028000
53378     53378     neimenggu      112.6167       41.2833           75       170     2012      04        21        112              0.000000      11.110596       0.000000       0.167524       0.071000   -9999.000000       0.079300       0.182000
53378     53378     neimenggu      112.6167       41.2833           75       170     2012      04        22        113              0.000000      12.828949       0.000000       0.168816       0.071000       0.093700   -9999.000000       0.086000
53378     53378     neimenggu      112.6167       41.2833           75       170     2012      04        23        114              0.000000      16.472992       2.561523       0.160647       0.083000       0.103500       0.114900       0.747000
53378     53378     neimenggu      112.6167       41.2833           75       170     2012      04        24        115              0.000000      11.824036       1.216406       0.181189       0.135000   -9999.000000       0.091800   -9999.000000
53378     53378     neimenggu      112.6167       41.2833           75       170     2012      04        25        116              0.000000       7.138763       0.000000       0.185991   -9999.000000       0.039900       0.091000       0.125000
53378     53378     neimenggu      112.6167       41.2833           75       170     2012      04        26        117              0.000000       6.434296       0.653613       0.182082       0.066000   -9999.000000       0.083200       0.065000
53378     53378     neimenggu      112.6167       41.2833           75       170     2012      04        27        118              0.000000       9.918457       0.000000       0.181451       0.072000       0.089200   -9999.000000       0.015000
53378     53378     neimenggu      112.6167       41.2833           75       170     2012      04        28        119              0.000000       6.265991       0.000000       0.178938       0.077000       0.088500       0.068700       0.112000
53378     53378     neimenggu      112.6167       41.2833           75       170     2012      04        29        120              0.000000      11.754883       0.000000       0.174366       0.081500   -9999.000000       0.074900   -9999.000000
53378     53378     neimenggu      112.6167       41.2833           75       170     2012      04        30        121              0.000000      15.686554       1.516528       0.166831       0.080000       0.129400       0.074500       0.058000
53378     53378     neimenggu      112.6167       41.2833           75       170     2012      05        01        122              0.000000      13.187622       0.488545       0.185094       0.081000   -9999.000000       0.124800       0.447000
53378     53378     neimenggu      112.6167       41.2833           75       170     2012      05        02        123              0.000000      14.596802       0.000000       0.181187       0.071500   -9999.000000       0.082200       0.411000
53378     53378     neimenggu      112.6167       41.2833           75       170     2012      05        03        124              0.000000      15.775146       0.000000       0.172563       0.076000       0.160300       0.084700       0.073000
53378     53378     neimenggu      112.6167       41.2833           75       170     2012      05        04        125              0.000000      17.994385       0.000000       0.161792       0.074000   -9999.000000       0.065700       0.035000
53378     53378     neimenggu      112.6167       41.2833           75       170     2012      05        05        126              0.074000      18.887543       0.000000       0.153392       0.069000   -9999.000000       0.066900       0.086000
53378     53378     neimenggu      112.6167       41.2833           75       170     2012      05        06        127              0.000000      19.568665       0.000000       0.147995       0.068000   -9999.000000       0.064800       0.119000
53378     53378     neimenggu      112.6167       41.2833           75       170     2012      05        07        128              0.000000      20.431824       0.908059       0.144192   -9999.000000   -9999.000000       0.079200       0.201000
53378     53378     neimenggu      112.6167       41.2833           75       170     2012      05        08        129              0.000000      19.941315       0.000000       0.143376       0.070000       0.050300       0.080800       0.094000
53378     53378     neimenggu      112.6167       41.2833           75       170     2012      05        09        130              0.000000      20.375458       1.638145       0.141395       0.089000   -9999.000000       0.075500       0.079000
53378     53378     neimenggu      112.6167       41.2833           75       170     2012      05        10        131              0.000000      18.185669       4.497678       0.162864       0.189000   -9999.000000       0.100000       0.649000
53378     53378     neimenggu      112.6167       41.2833           75       170     2012      05        11        132              0.000000      18.563751       0.845227       0.192024   -9999.000000   -9999.000000       0.139000       0.443000
53378     53378     neimenggu      112.6167       41.2833           75       170     2012      05        12        133              0.000000      13.913757       0.000000       0.214707       0.089000       0.321200       0.091700       0.089000
53378     53378     neimenggu      112.6167       41.2833           75       170     2012      05        13        134              0.000000      12.024078       0.000000       0.196474       0.084000       0.110500       0.083000   -9999.000000
53378     53378     neimenggu      112.6167       41.2833           75       170     2012      05        14        135              0.000000       9.213379       0.000000       0.187392       0.084000   -9999.000000       0.085300       0.061000
53378     53378     neimenggu      112.6167       41.2833           75       170     2012      05        15        136              0.000000      10.308990       0.000000       0.179524       0.075000       0.060000       0.071600       0.092000
53378     53378     neimenggu      112.6167       41.2833           75       170     2012      05        16        137              0.000000      11.493835       0.000000       0.173576   -9999.000000       0.062900       0.069200       0.171000
53378     53378     neimenggu      112.6167       41.2833           75       170     2012      05        17        138              0.000000      13.042694       0.000000       0.168032       0.072000   -9999.000000       0.069000       0.149000
53378     53378     neimenggu      112.6167       41.2833           75       170     2012      05        18        139              0.000000      17.644287       0.882147       0.159165       0.080000       0.089000       0.085400   -9999.000000
53378     53378     neimenggu      112.6167       41.2833           75       170     2012      05        19        140              0.000000      16.219666       1.055480       0.165662   -9999.000000   -9999.000000       0.121100       0.142000
53378     53378     neimenggu      112.6167       41.2833           75       170     2012      05        20        141              0.000000      17.524872       0.000000       0.172113       0.079000   -9999.000000       0.082200       0.146000
53378     53378     neimenggu      112.6167       41.2833           75       170     2012      05        21        142              0.000000      21.416840       3.649071       0.165525   -9999.000000       0.139400       0.139000       0.153000
53378     53378     neimenggu      112.6167       41.2833           75       170     2012      05        22        143              0.000000      14.217834       0.000000       0.197090       0.091000   -9999.000000       0.076700       0.092000
53378     53378     neimenggu      112.6167       41.2833           75       170     2012      05        23        144              0.000000      13.132202       0.000000       0.190902   -9999.000000       0.103000       0.068300   -9999.000000
53378     53378     neimenggu      112.6167       41.2833           75       170     2012      05        24        145              0.000000      14.463104       0.194973       0.176508       0.082000   -9999.000000       0.082300       0.107000
53378     53378     neimenggu      112.6167       41.2833           75       170     2012      05        25        146              0.000000      15.445618       0.136852       0.168201       0.093500   -9999.000000       0.083400       0.149000
53378     53378     neimenggu      112.6167       41.2833           75       170     2012      05        26        147              0.000000      15.341156       0.000000       0.166058       0.080000       0.085500       0.066000       0.144000
53378     53378     neimenggu      112.6167       41.2833           75       170     2012      05        27        148              0.000000      18.729584       0.000000       0.156444       0.075000   -9999.000000       0.065100       0.194000
53378     53378     neimenggu      112.6167       41.2833           75       170     2012      05        28        149              0.000000      21.003967       8.048171       0.148341       0.077000       0.040400       0.067100   -9999.000000
53378     53378     neimenggu      112.6167       41.2833           75       170     2012      05        29        150              0.000000      20.368652       0.269230       0.170837       0.173000   -9999.000000       0.130900       0.542000
53378     53378     neimenggu      112.6167       41.2833           75       170     2012      05        30        151              0.000000      11.313965       0.081816       0.229728       0.092000       0.238100       0.082000   -9999.000000
53378     53378     neimenggu      112.6167       41.2833           75       170     2012      05        31        152              0.000000      15.403625       3.381634       0.204597   -9999.000000       0.038800   -9999.000000   -9999.000000
53378     53378     neimenggu      112.6167       41.2833           75       170     2012      06        01        153              0.000000      13.348022       0.000000       0.229388       0.130000   -9999.000000       0.076300       0.128000
53378     53378     neimenggu      112.6167       41.2833           75       170     2012      06        02        154              0.000000      14.527954       0.593475       0.209302       0.112500       0.114900       0.076100       0.173000
53378     53378     neimenggu      112.6167       41.2833           75       170     2012      06        03        155              0.000000      17.577484       0.158739       0.198681       0.103000       0.192700       0.069700       0.335000
53378     53378     neimenggu      112.6167       41.2833           75       170     2012      06        04        156              0.042000      17.096649       0.000000       0.192062       0.082000   -9999.000000       0.089700       0.132000
53378     53378     neimenggu      112.6167       41.2833           75       170     2012      06        05        157              0.000000      18.503357       6.437783       0.178681       0.103500       0.076500       0.116500       0.302000
53378     53378     neimenggu      112.6167       41.2833           75       170     2012      06        06        158              0.000000      20.289062       0.063468       0.201728       0.126000   -9999.000000       0.102200       0.209000
53378     53378     neimenggu      112.6167       41.2833           75       170     2012      06        07        159              0.000000      16.504730       2.966418       0.222632       0.089000       0.185500       0.137100       0.178000
53378     53378     neimenggu      112.6167       41.2833           75       170     2012      06        08        160              0.000000      16.050873       2.306062       0.227957       0.154500       0.111800       0.128300       0.808000
53378     53378     neimenggu      112.6167       41.2833           75       170     2012      06        09        161              0.000000      17.233154       0.000000       0.229172       0.114000   -9999.000000       0.085900       0.183000
53378     53378     neimenggu      112.6167       41.2833           75       170     2012      06        10        162              0.000000      15.095795       0.000000       0.215332       0.105000       0.101000       0.086300       0.208000
53378     53378     neimenggu      112.6167       41.2833           75       170     2012      06        11        163              0.000000      14.798462       0.357602       0.200616       0.158000   -9999.000000       0.131100   -9999.000000
53378     53378     neimenggu      112.6167       41.2833           75       170     2012      06        12        164              0.000000      16.873169       0.089716       0.189537       0.110000   -9999.000000       0.072400       0.246000
53378     53378     neimenggu      112.6167       41.2833           75       170     2012      06        13        165              0.000000      16.709656       4.098187       0.187217       0.246000       0.081100       0.135600       0.799000
53378     53378     neimenggu      112.6167       41.2833           75       170     2012      06        14        166              0.000000      12.400604       0.803236       0.225510       0.195000   -9999.000000       0.163100       0.886000
53378     53378     neimenggu      112.6167       41.2833           75       170     2012      06        15        167              0.000000      12.090881       0.000000       0.223134       0.151500       0.329300       0.105200       0.281000
53378     53378     neimenggu      112.6167       41.2833           75       170     2012      06        16        168              0.000000      16.432404       0.000000       0.208487       0.118000   -9999.000000       0.086900   -9999.000000
53378     53378     neimenggu      112.6167       41.2833           75       170     2012      06        17        169              0.000000      20.328094       1.573577       0.190827       0.108000       0.169400       0.085900       0.294000
53378     53378     neimenggu      112.6167       41.2833           75       170     2012      06        18        170              0.000000      22.029327       0.232729       0.175663       0.095000       0.040000       0.060600       0.239000
53378     53378     neimenggu      112.6167       41.2833           75       170     2012      06        19        171              0.000000      23.342560       1.084040       0.168193       0.132000   -9999.000000       0.066800       0.277000
53378     53378     neimenggu      112.6167       41.2833           75       170     2012      06        20        172              0.000000      21.734833       0.328103       0.171845       0.117000       0.036500       0.066400       0.342000
53378     53378     neimenggu      112.6167       41.2833           75       170     2012      06        21        173              0.000000      20.686035       0.403641       0.171264       0.217000   -9999.000000       0.087100   -9999.000000
53378     53378     neimenggu      112.6167       41.2833           75       170     2012      06        22        174              0.000000      20.330444       3.485931       0.169495       0.204000   -9999.000000       0.107700       0.624000
53378     53378     neimenggu      112.6167       41.2833           75       170     2012      06        23        175              0.000000      20.932617       4.337647       0.196448       0.173500       0.106800       0.103800       0.548000
53378     53378     neimenggu      112.6167       41.2833           75       170     2012      06        24        176              0.000000      22.717041       2.610957       0.212382       0.160000   -9999.000000       0.091400       0.484000
53378     53378     neimenggu      112.6167       41.2833           75       170     2012      06        25        177              0.000000      19.713104      25.961267       0.221642       0.139000   -9999.000000       0.110600       0.901000
53378     53378     neimenggu      112.6167       41.2833           75       170     2012      06        26        178              0.000000      20.620392       5.244846       0.294290       0.296000       0.191300   -9999.000000   -9999.000000
53378     53378     neimenggu      112.6167       41.2833           75       170     2012      06        27        179              0.000000      17.869385       2.384264       0.292152       0.295000   -9999.000000       0.174200       0.855000
53378     53378     neimenggu      112.6167       41.2833           75       170     2012      06        28        180              0.000000      18.213593       0.378695       0.274906       0.295000       0.298000       0.185100       0.913000
53378     53378     neimenggu      112.6167       41.2833           75       170     2012      06        29        181              0.000000      16.997742       0.235031       0.268384       0.199500       0.179700       0.120600       0.841000
53378     53378     neimenggu      112.6167       41.2833           75       170     2012      06        30        182              0.000000      19.490326       0.000000       0.250350       0.149000   -9999.000000       0.098600   -9999.000000
53378     53378     neimenggu      112.6167       41.2833           75       170     2012      07        01        183              0.000000      21.883087       0.000000       0.234801       0.154000       0.095700       0.084400       0.329000
53378     53378     neimenggu      112.6167       41.2833           75       170     2012      07        02        184              0.000000      21.385101       0.000000       0.220660       0.156000   -9999.000000       0.098200       0.437000
53378     53378     neimenggu      112.6167       41.2833           75       170     2012      07        03        185              0.000000      21.997742       0.000000       0.210866       0.146000       0.076600       0.096100       0.344000
53378     53378     neimenggu      112.6167       41.2833           75       170     2012      07        04        186              0.000000      23.186829       1.602611       0.202187       0.167500   -9999.000000       0.130600       0.461000
53378     53378     neimenggu      112.6167       41.2833           75       170     2012      07        05        187              0.000000      22.194366       1.827990       0.201228       0.135000       0.171300       0.100900       0.655000
53378     53378     neimenggu      112.6167       41.2833           75       170     2012      07        06        188              0.000000      22.498810       0.063782       0.209145   -9999.000000       0.155000       0.083100       0.401000
53378     53378     neimenggu      112.6167       41.2833           75       170     2012      07        07        189              0.000000      24.722412       1.622039       0.197742   -9999.000000   -9999.000000       0.092800       0.488000
53378     53378     neimenggu      112.6167       41.2833           75       170     2012      07        08        190              0.000000      21.313751       0.601392       0.210106       0.155000       0.025300       0.102800       0.337000
53378     53378     neimenggu      112.6167       41.2833           75       170     2012      07        09        191              0.000000      22.404755       0.115954       0.203269       0.142500       0.078100       0.122800       0.537000
53378     53378     neimenggu      112.6167       41.2833           75       170     2012      07        10        192              0.000000      23.041656       1.316270       0.192577       0.138000       0.205800   -9999.000000   -9999.000000
53378     53378     neimenggu      112.6167       41.2833           75       170     2012      07        11        193              0.000000      22.338745       0.000000       0.196324       0.156000       0.202500       0.093700       0.447000
53378     53378     neimenggu      112.6167       41.2833           75       170     2012      07        12        194              0.000000      22.043945       0.637138       0.187824       0.175500   -9999.000000       0.097900       0.516000
53378     53378     neimenggu      112.6167       41.2833           75       170     2012      07        13        195              0.000000      20.303711       1.355803       0.189670       0.238000   -9999.000000       0.136700       0.492000
53378     53378     neimenggu      112.6167       41.2833           75       170     2012      07        14        196              0.000000      20.293335      16.129509       0.198222       0.302000       0.128600       0.161000       0.874000
53378     53378     neimenggu      112.6167       41.2833           75       170     2012      07        15        197              0.000000      18.377777       0.715465       0.280114       0.177500   -9999.000000       0.123600   -9999.000000
53378     53378     neimenggu      112.6167       41.2833           75       170     2012      07        16        198              0.000000      21.304688       0.110999       0.254902       0.158000       0.338900       0.092100       0.604000
53378     53378     neimenggu      112.6167       41.2833           75       170     2012      07        17        199              0.000000      22.066986       0.000000       0.234996       0.164000   -9999.000000       0.092200       0.372000
53378     53378     neimenggu      112.6167       41.2833           75       170     2012      07        18        200              0.000000      22.491943       0.000000       0.220464       0.170000   -9999.000000       0.088500       0.518000
53378     53378     neimenggu      112.6167       41.2833           75       170     2012      07        19        201              0.000000      21.789459       1.273764       0.212740       0.206000       0.115100       0.111000       0.422000
53378     53378     neimenggu      112.6167       41.2833           75       170     2012      07        20        202              0.066188      21.971924      19.066965       0.217889       0.113000   -9999.000000       0.131200   -9999.000000
53378     53378     neimenggu      112.6167       41.2833           75       170     2012      07        21        203              0.135167      21.870117      14.325644       0.272239       0.295000       0.222300       0.173000       1.000000
53378     53378     neimenggu      112.6167       41.2833           75       170     2012      07        22        204              0.121375      16.482178       0.778418       0.310724       0.255000   -9999.000000       0.142100       0.804000
53378     53378     neimenggu      112.6167       41.2833           75       170     2012      07        23        205              0.114000      18.881653       0.275777       0.279354       0.207000       0.469300       0.128800       0.756000
53378     53378     neimenggu      112.6167       41.2833           75       170     2012      07        24        206              0.117208      20.280334      13.835742       0.265100       0.275000       0.441200       0.113400       0.448000
53378     53378     neimenggu      112.6167       41.2833           75       170     2012      07        25        207              0.168667      22.295868      20.755320       0.270385       0.340000   -9999.000000       0.231700   -9999.000000
53378     53378     neimenggu      112.6167       41.2833           75       170     2012      07        26        208              0.140875      19.816620       0.110969       0.319853       0.274000       0.442900       0.178600       0.882000
53378     53378     neimenggu      112.6167       41.2833           75       170     2012      07        27        209              0.151000      21.317657      22.373940       0.288090       0.236000       0.162100       0.155500       0.896000
53378     53378     neimenggu      112.6167       41.2833           75       170     2012      07        28        210              0.174750      22.262451      17.193014       0.303316       0.320000       0.489800       0.173200       1.000000
53378     53378     neimenggu      112.6167       41.2833           75       170     2012      07        29        211              0.150667      20.534912       0.110436       0.332160       0.283000       0.314300       0.209500       0.894000
53378     53378     neimenggu      112.6167       41.2833           75       170     2012      07        30        212              0.149083      19.924408       2.977616       0.298239       0.319000   -9999.000000       0.234200       0.990000
53378     53378     neimenggu      112.6167       41.2833           75       170     2012      07        31        213              0.144875      17.771606       0.101523       0.295471       0.236500   -9999.000000       0.189200       0.890000
53378     53378     neimenggu      112.6167       41.2833           75       170     2012      08        01        214              0.137750      20.712891       3.831795       0.283535       0.247000       0.194700       0.212100       0.948000
53378     53378     neimenggu      112.6167       41.2833           75       170     2012      08        02        215              0.132333      19.842377       4.057878       0.284690       0.244000   -9999.000000       0.198500       0.761000
53378     53378     neimenggu      112.6167       41.2833           75       170     2012      08        03        216              0.130375      20.414185       0.091537       0.286042       0.250000       0.338700       0.179200       0.857000
53378     53378     neimenggu      112.6167       41.2833           75       170     2012      08        04        217              0.126792      21.294739       0.027429       0.274547       0.244000   -9999.000000       0.169700       0.772000
53378     53378     neimenggu      112.6167       41.2833           75       170     2012      08        05        218              0.122667      22.912628       0.102879       0.264270       0.183000   -9999.000000       0.160000       0.839000
53378     53378     neimenggu      112.6167       41.2833           75       170     2012      08        06        219              0.117250      23.204437       0.000000       0.256834       0.189000       0.124600       0.163700       0.637000
53378     53378     neimenggu      112.6167       41.2833           75       170     2012      08        07        220              0.113167      22.666321       2.444517       0.250413       0.225000   -9999.000000   -9999.000000       0.834000
53378     53378     neimenggu      112.6167       41.2833           75       170     2012      08        08        221              0.113792      21.004730       0.000000       0.261195       0.210500       0.255300       0.147500   -9999.000000
53378     53378     neimenggu      112.6167       41.2833           75       170     2012      08        09        222              0.115542      20.833099       0.000000       0.250468       0.199000   -9999.000000       0.144100       0.687000
53378     53378     neimenggu      112.6167       41.2833           75       170     2012      08        10        223              0.113417      21.607452       3.094234       0.240588       0.187000   -9999.000000       0.138900       0.489000
53378     53378     neimenggu      112.6167       41.2833           75       170     2012      08        11        224              0.123625      21.243530       3.493370       0.248537       0.239500       0.148200       0.176400       1.000000
53378     53378     neimenggu      112.6167       41.2833           75       170     2012      08        12        225              0.121667      17.008667       0.000000       0.269891       0.174000   -9999.000000       0.161900       0.625000
53378     53378     neimenggu      112.6167       41.2833           75       170     2012      08        13        226              0.119261      18.983978       1.576204       0.252556       0.161500   -9999.000000       0.139000   -9999.000000
53378     53378     neimenggu      112.6167       41.2833           75       170     2012      08        14        227              0.149583      19.994354       5.639371       0.244853       0.304000       0.086100       0.230000       0.941000
53378     53378     neimenggu      112.6167       41.2833           75       170     2012      08        15        228              0.133417      16.798187       0.000000       0.277597       0.231000   -9999.000000       0.194400       0.826000
53378     53378     neimenggu      112.6167       41.2833           75       170     2012      08        16        229              0.128292      18.639954       0.000000       0.257357       0.160000       0.146000       0.180700       0.835000
53378     53378     neimenggu      112.6167       41.2833           75       170     2012      08        17        230              0.128958      20.120392      12.446972       0.248460       0.187000   -9999.000000       0.209200       0.941000
53378     53378     neimenggu      112.6167       41.2833           75       170     2012      08        18        231              0.126083      18.689941       0.152511       0.288022       0.228000       0.619100       0.192100   -9999.000000
53378     53378     neimenggu      112.6167       41.2833           75       170     2012      08        19        232              0.124708      18.363922       0.255514       0.275075       0.192000       0.144400       0.154700       0.817000
53378     53378     neimenggu      112.6167       41.2833           75       170     2012      08        20        233              0.119042      19.658691       0.304373       0.259956   -9999.000000       0.308000       0.161200       0.644000
53378     53378     neimenggu      112.6167       41.2833           75       170     2012      08        21        234              0.114667      14.677338       0.000000       0.253932       0.156000       0.136600       0.153400       0.660000
53378     53378     neimenggu      112.6167       41.2833           75       170     2012      08        22        235              0.115208      13.315918       0.000000       0.247272       0.160500       0.155900       0.164000   -9999.000000
53378     53378     neimenggu      112.6167       41.2833           75       170     2012      08        23        236              0.115375      15.834808       0.000000       0.240303       0.152000   -9999.000000       0.170200   -9999.000000
53378     53378     neimenggu      112.6167       41.2833           75       170     2012      08        24        237              0.114625      17.581940       0.000000       0.234205       0.171000       0.078900       0.167500       0.581000
53378     53378     neimenggu      112.6167       41.2833           75       170     2012      08        25        238              0.000000      18.864197       0.865355       0.229423       0.194000   -9999.000000       0.196700       0.736000
53378     53378     neimenggu      112.6167       41.2833           75       170     2012      08        26        239              0.113625      17.914642       0.531298       0.235076       0.184000       0.106800       0.182100       0.791000
53378     53378     neimenggu      112.6167       41.2833           75       170     2012      08        27        240              0.119667      20.012878       7.748637       0.232661       0.196000   -9999.000000   -9999.000000       0.533000
53378     53378     neimenggu      112.6167       41.2833           75       170     2012      08        28        241              0.118000      19.228821       0.000000       0.274667       0.147000       0.162400       0.151500       0.480000
53378     53378     neimenggu      112.6167       41.2833           75       170     2012      08        29        242              0.115333      18.729279       1.908805       0.250564       0.156000       0.126600       0.160800       0.594000
53378     53378     neimenggu      112.6167       41.2833           75       170     2012      08        30        243              0.113208      19.699554       0.000000       0.241439       0.153000   -9999.000000       0.130700       0.451000
53378     53378     neimenggu      112.6167       41.2833           75       170     2012      08        31        244              0.109542      19.934906       0.144566       0.231723       0.170000       0.013700       0.136600       0.486000
53378     53378     neimenggu      112.6167       41.2833           75       170     2012      09        01        245              0.141125      18.101044      14.900127       0.228882       0.262000       0.048300       0.192000       0.882000
53378     53378     neimenggu      112.6167       41.2833           75       170     2012      09        02        246              0.134625      12.555328       0.374236       0.285723       0.253000   -9999.000000       0.201200       0.917000
53378     53378     neimenggu      112.6167       41.2833           75       170     2012      09        03        247              0.123667      12.389587       0.000000       0.272013       0.190000       0.267700       0.176900       0.745000
53378     53378     neimenggu      112.6167       41.2833           75       170     2012      09        04        248              0.121458       9.653900       0.000000       0.261209       0.181000   -9999.000000       0.164700       0.492000
53378     53378     neimenggu      112.6167       41.2833           75       170     2012      09        05        249              0.120042      12.665253       0.000000       0.252446       0.175000       0.226300       0.131500       0.372000
53378     53378     neimenggu      112.6167       41.2833           75       170     2012      09        06        250              0.121208      14.495026       0.091811       0.245402       0.158000       0.236800       0.132800   -9999.000000
53378     53378     neimenggu      112.6167       41.2833           75       170     2012      09        07        251              0.118333      16.022064       0.000000       0.240279       0.149500   -9999.000000       0.128800       0.478000
53378     53378     neimenggu      112.6167       41.2833           75       170     2012      09        08        252              0.116375      15.885803       0.000000       0.235321       0.132000       0.165900       0.143400       0.340000
53378     53378     neimenggu      112.6167       41.2833           75       170     2012      09        09        253              0.114542      16.209198       0.000000       0.230730       0.149500   -9999.000000       0.144500       0.574000
53378     53378     neimenggu      112.6167       41.2833           75       170     2012      09        10        254              0.110042      17.091766       0.096143       0.226398       0.172000   -9999.000000       0.125200       0.466000
53378     53378     neimenggu      112.6167       41.2833           75       170     2012      09        11        255              0.108000      13.979736       2.632069       0.226658   -9999.000000       0.019900       0.123900   -9999.000000
53378     53378     neimenggu      112.6167       41.2833           75       170     2012      09        12        256              0.108083      10.876190       0.208737       0.242833       0.149500   -9999.000000       0.128000       0.622000
53378     53378     neimenggu      112.6167       41.2833           75       170     2012      09        13        257              0.110042       9.425201       3.203897       0.239778       0.199000       0.183300       0.162000       0.749000
53378     53378     neimenggu      112.6167       41.2833           75       170     2012      09        14        258              0.110458       8.410583       0.041843       0.256473       0.153000   -9999.000000       0.129800       0.829000
53378     53378     neimenggu      112.6167       41.2833           75       170     2012      09        15        259              0.108792      11.101959       0.283942       0.245280       0.147000       0.136700       0.133000       0.365000
53378     53378     neimenggu      112.6167       41.2833           75       170     2012      09        16        260              0.107000      11.976959       0.000000       0.237855       0.146000       0.162400       0.115600   -9999.000000
53378     53378     neimenggu      112.6167       41.2833           75       170     2012      09        17        261              0.110917      12.662140       0.000000       0.234416       0.140000   -9999.000000       0.119700       0.474000
53378     53378     neimenggu      112.6167       41.2833           75       170     2012      09        18        262              0.111000      12.894623       0.125723       0.232684       0.131500       0.132000       0.110000       0.412000
53378     53378     neimenggu      112.6167       41.2833           75       170     2012      09        19        263              0.107458      13.817749       0.440653       0.227851       0.126000       0.129600       0.110400       0.439000
53378     53378     neimenggu      112.6167       41.2833           75       170     2012      09        20        264              0.106375      13.580933       2.967125       0.224598       0.148500       0.280900       0.140200       0.341000
53378     53378     neimenggu      112.6167       41.2833           75       170     2012      09        21        265              0.112083      14.502441       0.272371       0.228434   -9999.000000       0.237700       0.140400   -9999.000000
53378     53378     neimenggu      112.6167       41.2833           75       170     2012      09        22        266              0.110500      12.772308       0.508579       0.243486       0.138000       0.294200       0.115600       0.584000
53378     53378     neimenggu      112.6167       41.2833           75       170     2012      09        23        267              0.106792      14.461395       0.509762       0.233313       0.136000       0.168200       0.132200       0.525000
53378     53378     neimenggu      112.6167       41.2833           75       170     2012      09        24        268              0.115875      14.225677      10.422535       0.232750       0.135000       0.143700       0.114600       0.460000
53378     53378     neimenggu      112.6167       41.2833           75       170     2012      09        25        269              0.123458      12.285431       0.547259       0.259757       0.202000   -9999.000000       0.126600       0.749000
53378     53378     neimenggu      112.6167       41.2833           75       170     2012      09        26        270              0.146167      10.797760      15.839231       0.271680   -9999.000000       0.214300       0.186800       0.756000
53378     53378     neimenggu      112.6167       41.2833           75       170     2012      09        27        271              0.151429       9.830750       1.475929       0.300219   -9999.000000   -9999.000000       0.178400       0.840000
53378     53378     neimenggu      112.6167       41.2833           75       170     2012      09        28        272              0.127600       6.309845       0.160817       0.289317       0.200000   -9999.000000       0.163000       0.738000
53378     53378     neimenggu      112.6167       41.2833           75       170     2012      09        29        273              0.125167       6.954132       0.000000       0.275001       0.158000   -9999.000000       0.134800       0.538000
53378     53378     neimenggu      112.6167       41.2833           75       170     2012      09        30        274              0.121917       8.132416       0.000000       0.266330       0.145000       0.203300       0.117000       0.592000
53378     53378     neimenggu      112.6167       41.2833           75       170     2012      10        01        275              0.119750       9.510590       0.000000       0.260222       0.128500       0.283100       0.101700       0.532000
53378     53378     neimenggu      112.6167       41.2833           75       170     2012      10        02        276              0.115125      10.762085       0.107643       0.254876   -9999.000000   -9999.000000       0.104900       0.494000
53378     53378     neimenggu      112.6167       41.2833           75       170     2012      10        03        277              0.113625       9.577454       0.000000       0.251660       0.098000   -9999.000000       0.089800       0.413000
53378     53378     neimenggu      112.6167       41.2833           75       170     2012      10        04        278              0.111708       8.242371       0.346906       0.248736       0.118000       0.199200       0.094400       0.457000
53378     53378     neimenggu      112.6167       41.2833           75       170     2012      10        05        279              0.110708       8.596222       0.143938       0.248083       0.120000   -9999.000000       0.093700   -9999.000000
53378     53378     neimenggu      112.6167       41.2833           75       170     2012      10        06        280              0.110375       8.455597       0.091426       0.245630       0.119000       0.120100       0.096300       0.332000
53378     53378     neimenggu      112.6167       41.2833           75       170     2012      10        07        281              0.108125       9.658661       0.000000       0.242774       0.119000       0.174400       0.098000       0.361000
53378     53378     neimenggu      112.6167       41.2833           75       170     2012      10        08        282              0.107167      10.238861       1.274429       0.241263   -9999.000000       0.334900       0.124700       0.420000
53378     53378     neimenggu      112.6167       41.2833           75       170     2012      10        09        283              0.102792       9.983978       0.000000       0.245890       0.149000   -9999.000000       0.094900       0.300000
53378     53378     neimenggu      112.6167       41.2833           75       170     2012      10        10        284              0.102417       4.533539       0.000000       0.245638       0.128000   -9999.000000       0.093800   -9999.000000
53378     53378     neimenggu      112.6167       41.2833           75       170     2012      10        11        285              0.103167       6.138611       0.000000       0.243236       0.097000       0.139800       0.087200       0.331000
53378     53378     neimenggu      112.6167       41.2833           75       170     2012      10        12        286              0.100750       7.919006       0.718460       0.239687       0.099000       0.267400       0.092400       0.337000
53378     53378     neimenggu      112.6167       41.2833           75       170     2012      10        13        287              0.097083       6.536346       0.000000       0.230911   -9999.000000   -9999.000000       0.092700       0.227000
53378     53378     neimenggu      112.6167       41.2833           75       170     2012      10        14        288              0.098708       4.134125       0.000000       0.227745       0.092000   -9999.000000       0.081900       0.343000
53378     53378     neimenggu      112.6167       41.2833           75       170     2012      10        15        289              0.100667       7.714752       8.984865       0.234262       0.094000   -9999.000000       0.082400   -9999.000000
53378     53378     neimenggu      112.6167       41.2833           75       170     2012      10        16        290              0.097417       8.631042       0.000000       0.242540   -9999.000000   -9999.000000       0.089900       0.629000
53378     53378     neimenggu      112.6167       41.2833           75       170     2012      10        17        291              0.094292       2.148560       0.000000       0.247179   -9999.000000       0.094100       0.087600       0.360000
53378     53378     neimenggu      112.6167       41.2833           75       170     2012      10        18        292              0.096167       2.583832       0.000000       0.237400   -9999.000000   -9999.000000       0.086200       0.462000
53378     53378     neimenggu      112.6167       41.2833           75       170     2012      10        19        293              0.097542       3.630829       0.000000       0.243718   -9999.000000       0.132900       0.085200       0.356000
53378     53378     neimenggu      112.6167       41.2833           75       170     2012      10        20        294              0.098667       5.022888       0.216761       0.247066       0.101000   -9999.000000       0.084200   -9999.000000
53378     53378     neimenggu      112.6167       41.2833           75       170     2012      10        21        295              0.112042       6.152344      16.506174       0.247894   -9999.000000   -9999.000000       0.096800       0.742000
53378     53378     neimenggu      112.6167       41.2833           75       170     2012      10        22        296              0.109125       2.653168       0.078054       0.290613   -9999.000000   -9999.000000       0.111000       0.565000
53378     53378     neimenggu      112.6167       41.2833           75       170     2012      10        23        297              0.106542       2.518921       0.000000       0.273648   -9999.000000   -9999.000000       0.087900       0.628000
53378     53378     neimenggu      112.6167       41.2833           75       170     2012      10        24        298              0.105583       4.037384       0.241265       0.268061   -9999.000000   -9999.000000       0.085000       0.462000
53378     53378     neimenggu      112.6167       41.2833           75       170     2012      10        25        299              0.000000       4.976654       0.000000       0.264290       0.101000   -9999.000000       0.087100       0.441000
53378     53378     neimenggu      112.6167       41.2833           75       170     2012      10        26        300              0.101750       5.415985       0.626819       0.261632   -9999.000000   -9999.000000       0.088000       0.425000
53378     53378     neimenggu      112.6167       41.2833           75       170     2012      10        27        301              0.099458       4.157959       0.000000       0.262546       0.102000   -9999.000000       0.080900       0.340000
53378     53378     neimenggu      112.6167       41.2833           75       170     2012      10        28        302              0.000000       3.075714       0.000000       0.227260       0.113000   -9999.000000   -9999.000000       0.307000
53378     53378     neimenggu      112.6167       41.2833           75       170     2012      10        29        303              0.086375       3.612823       8.768884       0.237475   -9999.000000       0.057600       0.070000       0.174000
53378     53378     neimenggu      112.6167       41.2833           75       170     2012      10        30        304              0.070583      -0.163422       0.000000       0.183623   -9999.000000       0.105600       0.071300       0.148000
53378     53378     neimenggu      112.6167       41.2833           75       170     2012      10        31        305              0.077333      -0.766083       0.000000       0.162031   -9999.000000   -9999.000000       0.066200       0.187000
53378     53378     neimenggu      112.6167       41.2833           75       170     2012      11        01        306              0.091333       0.249603       0.000000       0.174290       0.086000       0.039000       0.070600       0.231000
53378     53378     neimenggu      112.6167       41.2833           75       170     2012      11        02        307              0.098042       1.285034       1.656473       0.200237       0.092000   -9999.000000       0.067500       0.282000
53378     53378     neimenggu      112.6167       41.2833           75       170     2012      11        03        308              0.095500       3.389374       0.352474       0.228017   -9999.000000   -9999.000000       0.070000   -9999.000000
53378     53378     neimenggu      112.6167       41.2833           75       170     2012      11        04        309              0.095625      -2.956604       0.000000       0.146706   -9999.000000       0.056300       0.066600       0.072000
53378     53378     neimenggu      112.6167       41.2833           75       170     2012      11        05        310              0.093875      -5.589630       1.003734       0.113689   -9999.000000   -9999.000000       0.054300       0.215000
53378     53378     neimenggu      112.6167       41.2833           75       170     2012      11        06        311              0.088333      -4.470001       0.873368       0.111895   -9999.000000   -9999.000000       0.053300       0.219000
53378     53378     neimenggu      112.6167       41.2833           75       170     2012      11        07        312              0.074917      -2.508087       0.000000       0.129004   -9999.000000   -9999.000000       0.053400       0.212000
53378     53378     neimenggu      112.6167       41.2833           75       170     2012      11        08        313              0.060875      -2.601288       0.144794       0.130747   -9999.000000   -9999.000000   -9999.000000   -9999.000000
53378     53378     neimenggu      112.6167       41.2833           75       170     2012      11        09        314              0.072042      -1.072540       0.000000       0.144811   -9999.000000   -9999.000000       0.055400       0.218000
53378     53378     neimenggu      112.6167       41.2833           75       170     2012      11        10        315              0.084083      -0.334961       0.000000       0.160612   -9999.000000       0.155200       0.055000       0.168000
53378     53378     neimenggu      112.6167       41.2833           75       170     2012      11        11        316              0.061417      -6.833344       0.000000       0.107143   -9999.000000       0.151300   -9999.000000       0.187000
53378     53378     neimenggu      112.6167       41.2833           75       170     2012      11        12        317              0.039583      -8.649628       0.000000       0.100435   -9999.000000   -9999.000000       0.043400       0.187000
53378     53378     neimenggu      112.6167       41.2833           75       170     2012      11        13        318              0.000000      -8.592590       0.000000       0.099466   -9999.000000       0.111400       0.046200   -9999.000000
53378     53378     neimenggu      112.6167       41.2833           75       170     2012      11        14        319              0.026625     -10.137512       0.000000       0.097769   -9999.000000       0.054700       0.050100       0.177000
53378     53378     neimenggu      112.6167       41.2833           75       170     2012      11        15        320              0.029125      -5.807648       0.000000       0.100757   -9999.000000   -9999.000000       0.044500       0.112000
53378     53378     neimenggu      112.6167       41.2833           75       170     2012      11        16        321              0.029500      -3.999359       0.000000       0.115317   -9999.000000   -9999.000000       0.044700       0.177000
53378     53378     neimenggu      112.6167       41.2833           75       170     2012      11        17        322              0.000000      -7.274689       0.000000       0.102812   -9999.000000       0.107500       0.039200       0.156000
53378     53378     neimenggu      112.6167       41.2833           75       170     2012      11        18        323              0.028875      -4.722076       0.000000       0.103221   -9999.000000   -9999.000000       0.044900   -9999.000000
53378     53378     neimenggu      112.6167       41.2833           75       170     2012      11        19        324              0.025667      -6.707581       0.000000       0.101804   -9999.000000       0.026700       0.040200       0.218000
53378     53378     neimenggu      112.6167       41.2833           75       170     2012      11        20        325              0.025917      -6.693970       0.000000       0.100939   -9999.000000   -9999.000000       0.041100       0.178000
53378     53378     neimenggu      112.6167       41.2833           75       170     2012      11        21        326              0.029125      -4.276215       0.000000       0.110669   -9999.000000   -9999.000000       0.036800       0.283000
53378     53378     neimenggu      112.6167       41.2833           75       170     2012      11        22        327              0.026042      -3.108337       0.000000       0.122029   -9999.000000   -9999.000000       0.036800       0.138000
53378     53378     neimenggu      112.6167       41.2833           75       170     2012      11        23        328              0.020750      -9.488037       0.000000       0.100925   -9999.000000       0.124000       0.035000       0.175000
53378     53378     neimenggu      112.6167       41.2833           75       170     2012      11        24        329              0.019750      -9.510040       0.000000       0.097183   -9999.000000       0.059800       0.036300       0.210000
53378     53378     neimenggu      112.6167       41.2833           75       170     2012      11        25        330              0.018875      -7.119080       0.000000       0.098001   -9999.000000       0.125100       0.034200       0.138000
53378     53378     neimenggu      112.6167       41.2833           75       170     2012      11        26        331              0.017208      -9.237854       0.000000       0.097193   -9999.000000   -9999.000000   -9999.000000       0.137000
53378     53378     neimenggu      112.6167       41.2833           75       170     2012      11        27        332              0.017125      -7.784332       0.000000       0.097386   -9999.000000   -9999.000000       0.039800       0.147000
53378     53378     neimenggu      112.6167       41.2833           75       170     2012      11        28        333              0.015750      -8.643707       0.000000       0.096943   -9999.000000       0.209300       0.030400       0.154000
53378     53378     neimenggu      112.6167       41.2833           75       170     2012      11        29        334              0.013625     -12.161530       0.000000       0.095321   -9999.000000       0.057100       0.032400       0.145000
53378     53378     neimenggu      112.6167       41.2833           75       170     2012      11        30        335              0.012125     -13.427277       0.000000       0.094005   -9999.000000   -9999.000000       0.035000       0.112000
53378     53378     neimenggu      112.6167       41.2833           75       170     2012      12        01        336              0.014750     -11.327362       0.000000       0.092964   -9999.000000   -9999.000000       0.036200       0.105000
53378     53378     neimenggu      112.6167       41.2833           75       170     2012      12        02        337              0.014625      -8.116364       0.000000       0.094555   -9999.000000   -9999.000000       0.036800   -9999.000000
53378     53378     neimenggu      112.6167       41.2833           75       170     2012      12        03        338              0.013750      -8.935547       0.000000       0.094449   -9999.000000   -9999.000000       0.039600       0.136000
53378     53378     neimenggu      112.6167       41.2833           75       170     2012      12        04        339              0.012000     -13.112946       0.000000       0.093293   -9999.000000   -9999.000000       0.032800       0.084000
53378     53378     neimenggu      112.6167       41.2833           75       170     2012      12        05        340              0.012000     -13.190582       0.000000       0.093162   -9999.000000   -9999.000000       0.030600       0.121000
53378     53378     neimenggu      112.6167       41.2833           75       170     2012      12        06        341              0.012000     -15.887451       0.000000       0.092604   -9999.000000   -9999.000000       0.032500       0.077000
53378     53378     neimenggu      112.6167       41.2833           75       170     2012      12        07        342              0.011750     -14.068817       0.000000       0.092893   -9999.000000   -9999.000000       0.037800   -9999.000000
53378     53378     neimenggu      112.6167       41.2833           75       170     2012      12        08        343              0.009917     -17.358688       0.000000       0.091852   -9999.000000   -9999.000000       0.038400       0.103000
53378     53378     neimenggu      112.6167       41.2833           75       170     2012      12        09        344              0.009667     -19.805252       0.000000       0.089952   -9999.000000   -9999.000000       0.040600       0.065000
53378     53378     neimenggu      112.6167       41.2833           75       170     2012      12        10        345              0.010833     -15.288269       0.000000       0.090021   -9999.000000   -9999.000000       0.028700       0.102000
53378     53378     neimenggu      112.6167       41.2833           75       170     2012      12        11        346              0.011417     -14.467285       0.000000       0.090726   -9999.000000   -9999.000000       0.031100       0.086000
53378     53378     neimenggu      112.6167       41.2833           75       170     2012      12        12        347              0.012000     -11.665253       0.000000       0.090957   -9999.000000   -9999.000000       0.037200   -9999.000000
53378     53378     neimenggu      112.6167       41.2833           75       170     2012      12        13        348              0.012000      -9.555298       0.000000       0.092052   -9999.000000   -9999.000000       0.037300       0.144000
53378     53378     neimenggu      112.6167       41.2833           75       170     2012      12        14        349              0.014500      -7.763184       0.000000       0.092822   -9999.000000   -9999.000000       0.033700       0.096000
53378     53378     neimenggu      112.6167       41.2833           75       170     2012      12        15        350              0.000000      -6.458374       0.000000       0.093541   -9999.000000   -9999.000000       0.024700       0.128000
53378     53378     neimenggu      112.6167       41.2833           75       170     2012      12        16        351              0.014167      -7.820038       0.000000       0.093680   -9999.000000   -9999.000000       0.027400       0.109000
53378     53378     neimenggu      112.6167       41.2833           75       170     2012      12        17        352              0.011500     -10.705048       0.000000       0.092447   -9999.000000   -9999.000000       0.021900   -9999.000000
53378     53378     neimenggu      112.6167       41.2833           75       170     2012      12        18        353              0.011500     -16.094879       0.000000       0.090566   -9999.000000   -9999.000000       0.028100       0.078000
53378     53378     neimenggu      112.6167       41.2833           75       170     2012      12        19        354              0.012000     -13.480469       5.771685       0.090734   -9999.000000   -9999.000000       0.030200       0.108000
53378     53378     neimenggu      112.6167       41.2833           75       170     2012      12        20        355              0.000000     -11.568512       0.000000       0.091526   -9999.000000   -9999.000000       0.030100       0.158000
53378     53378     neimenggu      112.6167       41.2833           75       170     2012      12        21        356              0.011750     -11.889984       0.000000       0.091633   -9999.000000   -9999.000000       0.026000       0.108000
53378     53378     neimenggu      112.6167       41.2833           75       170     2012      12        22        357              0.008667     -16.101166       0.000000       0.090632   -9999.000000   -9999.000000       0.023900       0.092000
53378     53378     neimenggu      112.6167       41.2833           75       170     2012      12        23        358              0.006000     -19.817505       0.000000       0.089745   -9999.000000   -9999.000000   -9999.000000       0.108000
53378     53378     neimenggu      112.6167       41.2833           75       170     2012      12        24        359              0.005300     -19.902649       0.000000       0.089354   -9999.000000   -9999.000000       0.037700       0.079000
53378     53378     neimenggu      112.6167       41.2833           75       170     2012      12        25        360              0.005583     -20.523911       0.000000       0.089267   -9999.000000   -9999.000000       0.034800       0.068000
53378     53378     neimenggu      112.6167       41.2833           75       170     2012      12        26        361              0.000000     -17.832413       0.000000       0.089426   -9999.000000   -9999.000000       0.035100       0.104000
53378     53378     neimenggu      112.6167       41.2833           75       170     2012      12        27        362              0.007000     -14.139557       0.000000       0.090223   -9999.000000   -9999.000000       0.033500       0.121000
53378     53378     neimenggu      112.6167       41.2833           75       170     2012      12        28        363              0.008000     -11.295929       0.000000       0.091188   -9999.000000   -9999.000000       0.028600       0.162000
53378     53378     neimenggu      112.6167       41.2833           75       170     2012      12        29        364              0.000000     -14.421082       0.000000       0.090678   -9999.000000   -9999.000000       0.039800       0.072000
53378     53378     neimenggu      112.6167       41.2833           75       170     2012      12        30        365              0.000000     -17.184082       0.000000       0.089794   -9999.000000   -9999.000000       0.035500       0.080000
53378     53378     neimenggu      112.6167       41.2833           75       170     2012      12        31        366              0.006000     -15.941559       0.000000       0.090050   -9999.000000   -9999.000000       0.028600   -9999.000000
