# Supplementary material for: Research on Fusing Multisatellite Soil Moisture Data Based on Bayesian Model Averaging
Source: Hindawi journal article supplement (doi:10.1155/2018/9310838), 2018-06-25
Supplement: f1 [file 9310838.f1.zip › 2012_sm00-10cm_daily_ZDB_ZHY_53467_366days_allin.txt]

53467     53467     neimenggu      111.1906       40.2728           79       165     2012      01        01        001              0.000000   -9999.000000       0.000000   -9999.000000   -9999.000000   -9999.000000       0.056400   -9999.000000
53467     53467     neimenggu      111.1906       40.2728           79       165     2012      01        02        002              0.000000      -7.588287       0.000000       0.136871   -9999.000000   -9999.000000       0.060300       0.092000
53467     53467     neimenggu      111.1906       40.2728           79       165     2012      01        03        003              0.000000      -8.579437       0.000000       0.136474   -9999.000000   -9999.000000       0.068500       0.002000
53467     53467     neimenggu      111.1906       40.2728           79       165     2012      01        04        004              0.000000     -10.523651       0.000000       0.135236   -9999.000000   -9999.000000       0.067100       0.074000
53467     53467     neimenggu      111.1906       40.2728           79       165     2012      01        05        005              0.000000     -10.945984       0.000000       0.134607   -9999.000000   -9999.000000       0.070000       0.020000
53467     53467     neimenggu      111.1906       40.2728           79       165     2012      01        06        006              0.000000     -10.002686       0.000000       0.134644   -9999.000000   -9999.000000       0.060300       0.104000
53467     53467     neimenggu      111.1906       40.2728           79       165     2012      01        07        007              0.000000      -8.862518       0.615808       0.135093   -9999.000000   -9999.000000       0.066600       0.071000
53467     53467     neimenggu      111.1906       40.2728           79       165     2012      01        08        008              0.000000      -9.053589       0.000000       0.135455   -9999.000000   -9999.000000       0.060800       0.024000
53467     53467     neimenggu      111.1906       40.2728           79       165     2012      01        09        009              0.000000      -8.877533       0.000000       0.135112   -9999.000000   -9999.000000   -9999.000000       0.011000
53467     53467     neimenggu      111.1906       40.2728           79       165     2012      01        10        010              0.000000      -8.202667       0.000000       0.135571   -9999.000000   -9999.000000       0.070400       0.010000
53467     53467     neimenggu      111.1906       40.2728           79       165     2012      01        11        011              0.000000      -8.319794       0.000000       0.137361   -9999.000000   -9999.000000       0.070900       0.053000
53467     53467     neimenggu      111.1906       40.2728           79       165     2012      01        12        012              0.000000      -8.896423       0.000000       0.134911   -9999.000000   -9999.000000       0.061500       0.157000
53467     53467     neimenggu      111.1906       40.2728           79       165     2012      01        13        013              0.000000      -8.368927       0.243676       0.136248   -9999.000000   -9999.000000       0.063900   -9999.000000
53467     53467     neimenggu      111.1906       40.2728           79       165     2012      01        14        014              0.000000      -8.254669       0.530841       0.136773   -9999.000000   -9999.000000   -9999.000000       0.140000
53467     53467     neimenggu      111.1906       40.2728           79       165     2012      01        15        015              0.000000      -7.366180       0.000000       0.138024   -9999.000000   -9999.000000       0.067000       0.055000
53467     53467     neimenggu      111.1906       40.2728           79       165     2012      01        16        016              0.000000      -6.936279       0.000000       0.149540   -9999.000000   -9999.000000       0.072200       0.026000
53467     53467     neimenggu      111.1906       40.2728           79       165     2012      01        17        017              0.000000      -7.078552       0.000000       0.148971   -9999.000000   -9999.000000       0.059400       0.115000
53467     53467     neimenggu      111.1906       40.2728           79       165     2012      01        18        018              0.000000      -7.547699       0.000000       0.146887   -9999.000000   -9999.000000       0.060700   -9999.000000
53467     53467     neimenggu      111.1906       40.2728           79       165     2012      01        19        019              0.000000      -6.293182       0.000000       0.146358   -9999.000000   -9999.000000       0.064400       0.009000
53467     53467     neimenggu      111.1906       40.2728           79       165     2012      01        20        020              0.000000      -6.265411       0.000000       0.149910   -9999.000000   -9999.000000       0.069400       0.154000
53467     53467     neimenggu      111.1906       40.2728           79       165     2012      01        21        021              0.000000     -10.027893       0.000000       0.140670   -9999.000000   -9999.000000       0.061700       0.076000
53467     53467     neimenggu      111.1906       40.2728           79       165     2012      01        22        022              0.000000     -11.710358       0.000000       0.137169   -9999.000000   -9999.000000       0.073000       0.097000
53467     53467     neimenggu      111.1906       40.2728           79       165     2012      01        23        023              0.000000     -12.367462       0.000000       0.135779   -9999.000000   -9999.000000       0.058100   -9999.000000
53467     53467     neimenggu      111.1906       40.2728           79       165     2012      01        24        024              0.000000     -11.446289       0.000000       0.135987   -9999.000000   -9999.000000   -9999.000000       0.018000
53467     53467     neimenggu      111.1906       40.2728           79       165     2012      01        25        025              0.000000     -10.476685       0.000000       0.136165   -9999.000000   -9999.000000       0.063800       0.158000
53467     53467     neimenggu      111.1906       40.2728           79       165     2012      01        26        026              0.000000      -8.751709       0.000000       0.136798   -9999.000000   -9999.000000       0.065900       0.037000
53467     53467     neimenggu      111.1906       40.2728           79       165     2012      01        27        027              0.000000      -7.852020       0.000000       0.139716   -9999.000000   -9999.000000       0.070400       0.045000
53467     53467     neimenggu      111.1906       40.2728           79       165     2012      01        28        028              0.000000      -6.831055       0.000000       0.144076   -9999.000000   -9999.000000       0.056000   -9999.000000
53467     53467     neimenggu      111.1906       40.2728           79       165     2012      01        29        029              0.000000      -7.893219       0.000000       0.140211   -9999.000000   -9999.000000       0.062500       0.055000
53467     53467     neimenggu      111.1906       40.2728           79       165     2012      01        30        030              0.000000      -8.215668       0.000000       0.140133   -9999.000000   -9999.000000       0.068100       0.172000
53467     53467     neimenggu      111.1906       40.2728           79       165     2012      01        31        031              0.000000      -6.759369       0.000000       0.144285   -9999.000000   -9999.000000   -9999.000000       0.019000
53467     53467     neimenggu      111.1906       40.2728           79       165     2012      02        01        032              0.000000      -7.923584       0.000000       0.144811   -9999.000000   -9999.000000       0.072000       0.042000
53467     53467     neimenggu      111.1906       40.2728           79       165     2012      02        02        033              0.000000     -10.524353       0.000000       0.136946   -9999.000000   -9999.000000       0.074500       0.026000
53467     53467     neimenggu      111.1906       40.2728           79       165     2012      02        03        034              0.000000     -10.154633       0.000000       0.136520   -9999.000000   -9999.000000       0.063400       0.103000
53467     53467     neimenggu      111.1906       40.2728           79       165     2012      02        04        035              0.000000      -8.628265       0.000000       0.140511   -9999.000000   -9999.000000       0.063700       0.068000
53467     53467     neimenggu      111.1906       40.2728           79       165     2012      02        05        036              0.000000      -7.480255       0.000000       0.142765   -9999.000000   -9999.000000       0.073000       0.205000
53467     53467     neimenggu      111.1906       40.2728           79       165     2012      02        06        037              0.000000      -5.743500       0.000000       0.156519   -9999.000000   -9999.000000       0.072200       0.063000
53467     53467     neimenggu      111.1906       40.2728           79       165     2012      02        07        038              0.000000     -10.269226       0.000000       0.138945   -9999.000000   -9999.000000       0.071200       0.118000
53467     53467     neimenggu      111.1906       40.2728           79       165     2012      02        08        039              0.000000      -9.972290       0.000000       0.136866   -9999.000000   -9999.000000       0.074800       0.001000
53467     53467     neimenggu      111.1906       40.2728           79       165     2012      02        09        040              0.000000      -9.014862       0.000000       0.137369   -9999.000000   -9999.000000       0.064000       0.067000
53467     53467     neimenggu      111.1906       40.2728           79       165     2012      02        10        041              0.000000      -8.680634       0.786106       0.141148   -9999.000000   -9999.000000       0.065400       0.131000
53467     53467     neimenggu      111.1906       40.2728           79       165     2012      02        11        042              0.000000      -7.761139       0.000000       0.145304   -9999.000000   -9999.000000       0.066100   -9999.000000
53467     53467     neimenggu      111.1906       40.2728           79       165     2012      02        12        043              0.000000      -5.323090       0.000000       0.159246   -9999.000000       0.039700   -9999.000000       0.037000
53467     53467     neimenggu      111.1906       40.2728           79       165     2012      02        13        044              0.000000      -3.093475       0.000000       0.173994       0.083000   -9999.000000   -9999.000000       0.062000
53467     53467     neimenggu      111.1906       40.2728           79       165     2012      02        14        045              0.000000      -2.328491       0.000000       0.191712       0.081000   -9999.000000   -9999.000000       0.007000
53467     53467     neimenggu      111.1906       40.2728           79       165     2012      02        15        046              0.000000      -3.955536       0.771489       0.180012   -9999.000000   -9999.000000       0.063100       0.111000
53467     53467     neimenggu      111.1906       40.2728           79       165     2012      02        16        047              0.000000      -5.702545       0.000000       0.167110   -9999.000000   -9999.000000       0.067300   -9999.000000
53467     53467     neimenggu      111.1906       40.2728           79       165     2012      02        17        048              0.000000      -7.456360       0.000000       0.147127   -9999.000000   -9999.000000       0.078000       0.075000
53467     53467     neimenggu      111.1906       40.2728           79       165     2012      02        18        049              0.000000      -7.719818       0.452957       0.148855   -9999.000000   -9999.000000       0.066600       0.048000
53467     53467     neimenggu      111.1906       40.2728           79       165     2012      02        19        050              0.000000      -6.976257       0.248944       0.154871       0.087000   -9999.000000       0.072200       0.030000
53467     53467     neimenggu      111.1906       40.2728           79       165     2012      02        20        051              0.000000      -5.059052       0.000000       0.170708       0.088000   -9999.000000       0.065700       0.087000
53467     53467     neimenggu      111.1906       40.2728           79       165     2012      02        21        052              0.000000      -2.424927       0.000000       0.187498   -9999.000000   -9999.000000   -9999.000000   -9999.000000
53467     53467     neimenggu      111.1906       40.2728           79       165     2012      02        22        053              0.000000       1.530884       0.000000       0.219492   -9999.000000   -9999.000000       0.067500       0.115000
53467     53467     neimenggu      111.1906       40.2728           79       165     2012      02        23        054              0.000000       0.028259       0.000000       0.209597       0.080000   -9999.000000       0.067900       0.183000
53467     53467     neimenggu      111.1906       40.2728           79       165     2012      02        24        055              0.000000       0.705292       0.000000       0.210141       0.081000   -9999.000000       0.066900       0.070000
53467     53467     neimenggu      111.1906       40.2728           79       165     2012      02        25        056              0.000000      -1.685272       0.000000       0.198285   -9999.000000   -9999.000000       0.068900       0.089000
53467     53467     neimenggu      111.1906       40.2728           79       165     2012      02        26        057              0.000000      -4.254822       0.000000       0.167781   -9999.000000   -9999.000000       0.063400   -9999.000000
53467     53467     neimenggu      111.1906       40.2728           79       165     2012      02        27        058              0.000000      -2.237915       0.205540       0.188164   -9999.000000   -9999.000000   -9999.000000       0.115000
53467     53467     neimenggu      111.1906       40.2728           79       165     2012      02        28        059              0.000000      -0.668304       0.000000       0.197704       0.086000       0.047300       0.068100       0.134000
53467     53467     neimenggu      111.1906       40.2728           79       165     2012      02        29        060              0.000000   -9999.000000       0.088368   -9999.000000       0.085000   -9999.000000   -9999.000000   -9999.000000
53467     53467     neimenggu      111.1906       40.2728           79       165     2012      03        01        061              0.000000       1.277496       0.000000       0.213456       0.084000       0.222300       0.072100       0.129000
53467     53467     neimenggu      111.1906       40.2728           79       165     2012      03        02        062              0.000000       1.329437       0.143282       0.216508   -9999.000000       0.032400       0.074800       0.018000
53467     53467     neimenggu      111.1906       40.2728           79       165     2012      03        03        063              0.000000       1.317261       0.144739       0.223439   -9999.000000   -9999.000000       0.074100       0.176000
53467     53467     neimenggu      111.1906       40.2728           79       165     2012      03        04        064              0.000000       1.786743       0.069505       0.231841   -9999.000000   -9999.000000       0.084100       0.300000
53467     53467     neimenggu      111.1906       40.2728           79       165     2012      03        05        065              0.000000       1.481476       0.434876       0.232119   -9999.000000   -9999.000000       0.072700       0.244000
53467     53467     neimenggu      111.1906       40.2728           79       165     2012      03        06        066              0.000000      -2.063019       0.208547       0.194246       0.103000       0.342500       0.075700       0.205000
53467     53467     neimenggu      111.1906       40.2728           79       165     2012      03        07        067              0.000000      -0.559326       0.060557       0.201721       0.096000       0.076100       0.069600       0.319000
53467     53467     neimenggu      111.1906       40.2728           79       165     2012      03        08        068              0.000000      -0.694519       0.000000       0.202025   -9999.000000   -9999.000000       0.070900       0.119000
53467     53467     neimenggu      111.1906       40.2728           79       165     2012      03        09        069              0.000000      -1.081818       0.000000       0.195111       0.092000       0.067400       0.077100       0.266000
53467     53467     neimenggu      111.1906       40.2728           79       165     2012      03        10        070              0.000000       1.181213       0.000000       0.213773       0.082000       0.011500       0.071200       0.146000
53467     53467     neimenggu      111.1906       40.2728           79       165     2012      03        11        071              0.000000      -1.598877       0.000000       0.195132       0.083000       0.248900       0.071000   -9999.000000
53467     53467     neimenggu      111.1906       40.2728           79       165     2012      03        12        072              0.000000      -1.686279       0.000000       0.190089       0.084000   -9999.000000       0.070800       0.278000
53467     53467     neimenggu      111.1906       40.2728           79       165     2012      03        13        073              0.000000       0.903137       0.000000       0.206902   -9999.000000   -9999.000000       0.074300       0.087000
53467     53467     neimenggu      111.1906       40.2728           79       165     2012      03        14        074              0.000000       2.750275       0.146010       0.219352   -9999.000000   -9999.000000   -9999.000000       0.220000
53467     53467     neimenggu      111.1906       40.2728           79       165     2012      03        15        075              0.000000       4.110443       2.239501       0.226282   -9999.000000   -9999.000000       0.124000       0.658000
53467     53467     neimenggu      111.1906       40.2728           79       165     2012      03        16        076              0.000000       2.392944       0.357894       0.241809   -9999.000000   -9999.000000   -9999.000000   -9999.000000
53467     53467     neimenggu      111.1906       40.2728           79       165     2012      03        17        077              0.000000       4.385712       0.094058       0.254024   -9999.000000       0.185300       0.086200       0.793000
53467     53467     neimenggu      111.1906       40.2728           79       165     2012      03        18        078              0.000000       4.658234       0.060040       0.245384   -9999.000000   -9999.000000       0.095500       0.463000
53467     53467     neimenggu      111.1906       40.2728           79       165     2012      03        19        079              0.000000       3.567841       0.036036       0.240429   -9999.000000   -9999.000000       0.112700       0.697000
53467     53467     neimenggu      111.1906       40.2728           79       165     2012      03        20        080              0.000000       5.574524       0.074088       0.246981   -9999.000000       0.039700       0.102200       0.428000
53467     53467     neimenggu      111.1906       40.2728           79       165     2012      03        21        081              0.000000       6.185364       0.035952       0.246521   -9999.000000   -9999.000000       0.128200   -9999.000000
53467     53467     neimenggu      111.1906       40.2728           79       165     2012      03        22        082              0.000000       3.159607       0.245065       0.246749   -9999.000000   -9999.000000       0.095700       0.682000
53467     53467     neimenggu      111.1906       40.2728           79       165     2012      03        23        083              0.000000       5.121307       0.036396       0.249299   -9999.000000   -9999.000000       0.083700       0.383000
53467     53467     neimenggu      111.1906       40.2728           79       165     2012      03        24        084              0.000000       4.843994       0.000000       0.241749   -9999.000000   -9999.000000   -9999.000000       0.660000
53467     53467     neimenggu      111.1906       40.2728           79       165     2012      03        25        085              0.000000       7.034088       0.797873       0.242422   -9999.000000       0.244000       0.098400       0.574000
53467     53467     neimenggu      111.1906       40.2728           79       165     2012      03        26        086              0.000000       8.415588       0.000000       0.240332   -9999.000000   -9999.000000       0.101000   -9999.000000
53467     53467     neimenggu      111.1906       40.2728           79       165     2012      03        27        087              0.000000       9.406219       0.000000       0.237180   -9999.000000       0.094900       0.090700       0.478000
53467     53467     neimenggu      111.1906       40.2728           79       165     2012      03        28        088              0.000000       9.857788       1.176667       0.232818   -9999.000000       0.055000       0.165100       0.782000
53467     53467     neimenggu      111.1906       40.2728           79       165     2012      03        29        089              0.000000       9.933960       0.150542       0.240294   -9999.000000       0.370700       0.097400       0.601000
53467     53467     neimenggu      111.1906       40.2728           79       165     2012      03        30        090              0.000000       8.464569       0.043549       0.238271   -9999.000000       0.117400       0.112200       0.532000
53467     53467     neimenggu      111.1906       40.2728           79       165     2012      03        31        091              0.000000       5.746826       0.000000       0.231902   -9999.000000   -9999.000000       0.096100       0.520000
53467     53467     neimenggu      111.1906       40.2728           79       165     2012      04        01        092              0.000000       8.149872       0.000000       0.231144   -9999.000000   -9999.000000       0.095900       0.473000
53467     53467     neimenggu      111.1906       40.2728           79       165     2012      04        02        093              0.000000       8.564301       0.083098       0.229740   -9999.000000   -9999.000000   -9999.000000       0.428000
53467     53467     neimenggu      111.1906       40.2728           79       165     2012      04        03        094              0.000000       6.373535       0.000000       0.219294   -9999.000000   -9999.000000       0.109000       0.500000
53467     53467     neimenggu      111.1906       40.2728           79       165     2012      04        04        095              0.000000       8.513763       0.000000       0.222145   -9999.000000       0.341400       0.116000       0.469000
53467     53467     neimenggu      111.1906       40.2728           79       165     2012      04        05        096              0.000000      10.514252       0.000000       0.216520   -9999.000000   -9999.000000       0.106100       0.489000
53467     53467     neimenggu      111.1906       40.2728           79       165     2012      04        06        097              0.000000      10.920624       0.000000       0.211390       0.088000   -9999.000000       0.097300       0.406000
53467     53467     neimenggu      111.1906       40.2728           79       165     2012      04        07        098              0.000000      12.822845       0.000000       0.205426       0.085000       0.211300       0.099500       0.521000
53467     53467     neimenggu      111.1906       40.2728           79       165     2012      04        08        099              0.000000      13.672455       0.000000       0.199205   -9999.000000   -9999.000000       0.103700       0.493000
53467     53467     neimenggu      111.1906       40.2728           79       165     2012      04        09        100              0.000000      14.017670       0.000000       0.194243   -9999.000000   -9999.000000       0.100900   -9999.000000
53467     53467     neimenggu      111.1906       40.2728           79       165     2012      04        10        101              0.000000      15.351654       0.000000       0.193021       0.089000   -9999.000000       0.093300       0.443000
53467     53467     neimenggu      111.1906       40.2728           79       165     2012      04        11        102              0.000000      13.026947       0.000000       0.191654   -9999.000000   -9999.000000       0.103200       0.318000
53467     53467     neimenggu      111.1906       40.2728           79       165     2012      04        12        103              0.000000       6.731903       0.000000       0.193760       0.089000       0.261300       0.096300       0.516000
53467     53467     neimenggu      111.1906       40.2728           79       165     2012      04        13        104              0.000000      12.796844       0.090434       0.192293       0.086000   -9999.000000       0.090000       0.396000
53467     53467     neimenggu      111.1906       40.2728           79       165     2012      04        14        105              0.000000      14.487244       0.000000       0.188553   -9999.000000       0.277200       0.093800   -9999.000000
53467     53467     neimenggu      111.1906       40.2728           79       165     2012      04        15        106              0.000000      15.420898       0.000000       0.185092       0.085000       0.110700       0.092200       0.455000
53467     53467     neimenggu      111.1906       40.2728           79       165     2012      04        16        107              0.000000      14.352631       0.000000       0.182570       0.079000   -9999.000000       0.092200       0.420000
53467     53467     neimenggu      111.1906       40.2728           79       165     2012      04        17        108              0.000000      14.945007       0.000000       0.180825       0.085000       0.356700       0.083700       0.439000
53467     53467     neimenggu      111.1906       40.2728           79       165     2012      04        18        109              0.000000      17.984131      20.102850       0.179501       0.067000   -9999.000000   -9999.000000       0.600000
53467     53467     neimenggu      111.1906       40.2728           79       165     2012      04        19        110              0.000000      13.135376       0.000000       0.302073   -9999.000000   -9999.000000   -9999.000000   -9999.000000
53467     53467     neimenggu      111.1906       40.2728           79       165     2012      04        20        111              0.000000      13.654999       0.404200       0.284077   -9999.000000       0.304900       0.116000       0.441000
53467     53467     neimenggu      111.1906       40.2728           79       165     2012      04        21        112              0.105000      15.592072       0.000000       0.268486       0.076000   -9999.000000       0.102200       0.391000
53467     53467     neimenggu      111.1906       40.2728           79       165     2012      04        22        113              0.000000      16.129395       0.089692       0.255879       0.080000   -9999.000000   -9999.000000       0.505000
53467     53467     neimenggu      111.1906       40.2728           79       165     2012      04        23        114              0.000000      19.965179       3.954590       0.240030       0.077000   -9999.000000       0.124700       0.892000
53467     53467     neimenggu      111.1906       40.2728           79       165     2012      04        24        115              0.000000      16.760468       0.000000       0.263547   -9999.000000       0.310900       0.106900   -9999.000000
53467     53467     neimenggu      111.1906       40.2728           79       165     2012      04        25        116              0.000000      13.493622       0.000000       0.256815   -9999.000000       0.288800       0.118400       0.486000
53467     53467     neimenggu      111.1906       40.2728           79       165     2012      04        26        117              0.000000      12.352264       0.199290       0.242778       0.081000   -9999.000000       0.107100       0.363000
53467     53467     neimenggu      111.1906       40.2728           79       165     2012      04        27        118              0.000000      16.442719       0.000000       0.230213       0.076000       0.462100   -9999.000000       0.463000
53467     53467     neimenggu      111.1906       40.2728           79       165     2012      04        28        119              0.000000      14.531952       0.000000       0.219948       0.079000   -9999.000000       0.086200       0.404000
53467     53467     neimenggu      111.1906       40.2728           79       165     2012      04        29        120              0.000000      17.217102       0.184082       0.210436       0.071000       0.120400       0.094600       0.398000
53467     53467     neimenggu      111.1906       40.2728           79       165     2012      04        30        121              0.000000      21.933258       1.773291       0.201495       0.092000       0.226800       0.090100       0.468000
53467     53467     neimenggu      111.1906       40.2728           79       165     2012      05        01        122              0.000000      18.866425       1.590015       0.217462       0.082500   -9999.000000       0.099100       0.430000
53467     53467     neimenggu      111.1906       40.2728           79       165     2012      05        02        123              0.000000      19.938965       0.362548       0.215290       0.069500       0.408700       0.095400       0.406000
53467     53467     neimenggu      111.1906       40.2728           79       165     2012      05        03        124              0.000000      20.841522       0.000000       0.202827       0.078000       0.107400       0.086200       0.352000
53467     53467     neimenggu      111.1906       40.2728           79       165     2012      05        04        125              0.000000      22.012329       0.000000       0.191809       0.072500   -9999.000000       0.079500       0.450000
53467     53467     neimenggu      111.1906       40.2728           79       165     2012      05        05        126              0.000000      23.893768       0.000000       0.183518       0.063000   -9999.000000       0.079000       0.380000
53467     53467     neimenggu      111.1906       40.2728           79       165     2012      05        06        127              0.000000      23.632751       0.000000       0.179224       0.071000   -9999.000000   -9999.000000       0.480000
53467     53467     neimenggu      111.1906       40.2728           79       165     2012      05        07        128              0.000000      25.761963       0.049069       0.177077   -9999.000000   -9999.000000       0.093700       0.422000
53467     53467     neimenggu      111.1906       40.2728           79       165     2012      05        08        129              0.000000      24.286041       0.100174       0.177405       0.073000       0.235000       0.101800   -9999.000000
53467     53467     neimenggu      111.1906       40.2728           79       165     2012      05        09        130              0.000000      25.763763       0.493872       0.176078       0.087000   -9999.000000       0.089600       0.412000
53467     53467     neimenggu      111.1906       40.2728           79       165     2012      05        10        131              0.000000      25.228333       4.782822       0.181484       0.180000   -9999.000000       0.079200       0.376000
53467     53467     neimenggu      111.1906       40.2728           79       165     2012      05        11        132              0.000000      25.761383       0.871645       0.205564       0.119000   -9999.000000       0.114000       0.893000
53467     53467     neimenggu      111.1906       40.2728           79       165     2012      05        12        133              0.085000      20.301727       0.000000       0.239170       0.079000       0.074400       0.104400       0.408000
53467     53467     neimenggu      111.1906       40.2728           79       165     2012      05        13        134              0.000000      17.871857       0.170335       0.213886       0.081000       0.236300       0.095600   -9999.000000
53467     53467     neimenggu      111.1906       40.2728           79       165     2012      05        14        135              0.000000      16.473541       0.000000       0.201535       0.074000   -9999.000000       0.101500       0.361000
53467     53467     neimenggu      111.1906       40.2728           79       165     2012      05        15        136              0.000000      16.793152       1.285243       0.191286       0.071000       0.330700       0.079700       0.314000
53467     53467     neimenggu      111.1906       40.2728           79       165     2012      05        16        137              0.000000      19.509918       0.000000       0.184063       0.070000   -9999.000000       0.081900       0.363000
53467     53467     neimenggu      111.1906       40.2728           79       165     2012      05        17        138              0.000000      20.158173       0.000000       0.179315       0.069500   -9999.000000       0.079400       0.416000
53467     53467     neimenggu      111.1906       40.2728           79       165     2012      05        18        139              0.000000      23.705566       0.082241       0.175324       0.063000       0.228600       0.090700   -9999.000000
53467     53467     neimenggu      111.1906       40.2728           79       165     2012      05        19        140              0.000000      23.910614       0.095194       0.174732       0.078000   -9999.000000       0.095800       0.342000
53467     53467     neimenggu      111.1906       40.2728           79       165     2012      05        20        141              0.000000      26.645081       0.000000       0.173173   -9999.000000   -9999.000000       0.076200       0.419000
53467     53467     neimenggu      111.1906       40.2728           79       165     2012      05        21        142              0.000000      28.751160       5.402454       0.171919   -9999.000000       0.060500       0.155600       0.583000
53467     53467     neimenggu      111.1906       40.2728           79       165     2012      05        22        143              0.000000      18.168976       0.060939       0.236394       0.094000   -9999.000000       0.090900       0.330000
53467     53467     neimenggu      111.1906       40.2728           79       165     2012      05        23        144              0.000000      18.794952       0.000000       0.222054   -9999.000000       0.276000       0.095400   -9999.000000
53467     53467     neimenggu      111.1906       40.2728           79       165     2012      05        24        145              0.000000      18.728699       0.000000       0.201722       0.080000   -9999.000000       0.088600       0.358000
53467     53467     neimenggu      111.1906       40.2728           79       165     2012      05        25        146              0.000000      21.633667       0.000000       0.187819       0.085500       0.362600       0.094700       0.333000
53467     53467     neimenggu      111.1906       40.2728           79       165     2012      05        26        147              0.000000      21.256470       0.000000       0.181219       0.075000       0.160200       0.075500       0.364000
53467     53467     neimenggu      111.1906       40.2728           79       165     2012      05        27        148              0.000000      24.383606       0.000000       0.175804       0.077500   -9999.000000       0.076100       0.306000
53467     53467     neimenggu      111.1906       40.2728           79       165     2012      05        28        149              0.000000      26.959991       5.188382       0.172310       0.077000       0.208300       0.076500       0.303000
53467     53467     neimenggu      111.1906       40.2728           79       165     2012      05        29        150              0.000000      26.227936       1.741220       0.197362       0.109000   -9999.000000       0.117500       0.479000
53467     53467     neimenggu      111.1906       40.2728           79       165     2012      05        30        151              0.000000      18.598816       1.254764       0.244930       0.086000   -9999.000000       0.089800   -9999.000000
53467     53467     neimenggu      111.1906       40.2728           79       165     2012      05        31        152              0.000000      20.256378       3.861094       0.218626   -9999.000000       0.151700   -9999.000000   -9999.000000
53467     53467     neimenggu      111.1906       40.2728           79       165     2012      06        01        153              0.000000      19.449738       0.029197       0.254263       0.101000   -9999.000000       0.080500       0.349000
53467     53467     neimenggu      111.1906       40.2728           79       165     2012      06        02        154              0.000000      21.842377       0.348475       0.223841       0.118000       0.168800       0.090800       0.314000
53467     53467     neimenggu      111.1906       40.2728           79       165     2012      06        03        155              0.000000      21.847809       3.590759       0.210007       0.131000   -9999.000000       0.092500       0.408000
53467     53467     neimenggu      111.1906       40.2728           79       165     2012      06        04        156              0.000000      22.510956       0.029132       0.237978       0.096000   -9999.000000       0.115100       0.433000
53467     53467     neimenggu      111.1906       40.2728           79       165     2012      06        05        157              0.000000      24.970581       0.196084       0.206747       0.113000       0.217300       0.129500       0.450000
53467     53467     neimenggu      111.1906       40.2728           79       165     2012      06        06        158              0.000000      26.430023       2.410439       0.191609       0.139000   -9999.000000       0.132900   -9999.000000
53467     53467     neimenggu      111.1906       40.2728           79       165     2012      06        07        159              0.000000      20.924408       0.759389       0.222387       0.126000   -9999.000000       0.125800       0.455000
53467     53467     neimenggu      111.1906       40.2728           79       165     2012      06        08        160              0.000000      20.649750       0.065290       0.216087       0.101000       0.157400       0.105200       0.407000
53467     53467     neimenggu      111.1906       40.2728           79       165     2012      06        09        161              0.000000      24.846252       0.000000       0.199562       0.093000   -9999.000000       0.114300       0.415000
53467     53467     neimenggu      111.1906       40.2728           79       165     2012      06        10        162              0.000000      23.299103       0.000000       0.186937       0.092000       0.257900       0.105200       0.440000
53467     53467     neimenggu      111.1906       40.2728           79       165     2012      06        11        163              0.000000      22.530304       0.135500       0.179025       0.103000   -9999.000000       0.117200   -9999.000000
53467     53467     neimenggu      111.1906       40.2728           79       165     2012      06        12        164              0.000000      24.089935       0.000000       0.175886       0.098500   -9999.000000       0.101400       0.368000
53467     53467     neimenggu      111.1906       40.2728           79       165     2012      06        13        165              0.000000      25.761841       0.000000       0.172890       0.098500       0.190500       0.100300       0.358000
53467     53467     neimenggu      111.1906       40.2728           79       165     2012      06        14        166              0.000000      22.994385       0.000000       0.172806       0.102000   -9999.000000       0.107600       0.390000
53467     53467     neimenggu      111.1906       40.2728           79       165     2012      06        15        167              0.000000      22.306549       0.000000       0.173006       0.104000       0.240800       0.108700       0.430000
53467     53467     neimenggu      111.1906       40.2728           79       165     2012      06        16        168              0.000000      24.979004       0.000000       0.171013       0.091000   -9999.000000       0.105300   -9999.000000
53467     53467     neimenggu      111.1906       40.2728           79       165     2012      06        17        169              0.000000      27.615631       0.000000       0.168786       0.096500   -9999.000000       0.110200       0.407000
53467     53467     neimenggu      111.1906       40.2728           79       165     2012      06        18        170              0.000000      30.319092       1.727676       0.167346       0.091000       0.181300       0.104900       0.492000
53467     53467     neimenggu      111.1906       40.2728           79       165     2012      06        19        171              0.000000      31.312195       0.200626       0.166919       0.102000   -9999.000000       0.109700       0.372000
53467     53467     neimenggu      111.1906       40.2728           79       165     2012      06        20        172              0.000000      28.169586       0.153936       0.168755       0.109000       0.317200   -9999.000000       0.486000
53467     53467     neimenggu      111.1906       40.2728           79       165     2012      06        21        173              0.000000      28.987274       0.023616       0.169162       0.113000   -9999.000000       0.118800   -9999.000000
53467     53467     neimenggu      111.1906       40.2728           79       165     2012      06        22        174              0.000000      28.870148       7.921148       0.167670       0.155000       0.029200       0.167400       0.504000
53467     53467     neimenggu      111.1906       40.2728           79       165     2012      06        23        175              0.000000      28.631683      18.219639       0.227053       0.150500       0.331200       0.090800       0.878000
53467     53467     neimenggu      111.1906       40.2728           79       165     2012      06        24        176              0.000000      25.725494       1.019528       0.306033       0.143000   -9999.000000       0.151800       0.729000
53467     53467     neimenggu      111.1906       40.2728           79       165     2012      06        25        177              0.000000      24.502411       3.354543       0.283722       0.126000   -9999.000000       0.143600       0.855000
53467     53467     neimenggu      111.1906       40.2728           79       165     2012      06        26        178              0.000000      25.671631       1.610705       0.273532       0.199000       0.368700       0.209300       0.672000
53467     53467     neimenggu      111.1906       40.2728           79       165     2012      06        27        179              0.000000      23.889343      19.078714       0.270908       0.269000       0.392900       0.251600       1.000000
53467     53467     neimenggu      111.1906       40.2728           79       165     2012      06        28        180              0.000000      22.669250       4.442369       0.321516       0.209000       0.340300       0.223900       0.874000
53467     53467     neimenggu      111.1906       40.2728           79       165     2012      06        29        181              0.000000      20.946045       0.122607       0.332651       0.140000   -9999.000000       0.191100   -9999.000000
53467     53467     neimenggu      111.1906       40.2728           79       165     2012      06        30        182              0.000000      24.299774       0.000000       0.301027       0.105000       0.274100       0.149800   -9999.000000
53467     53467     neimenggu      111.1906       40.2728           79       165     2012      07        01        183              0.000000      25.945587       0.000000       0.279680       0.125500       0.156000       0.136600       0.637000
53467     53467     neimenggu      111.1906       40.2728           79       165     2012      07        02        184              0.000000      27.048157       0.000000       0.261565       0.114000   -9999.000000       0.164300       0.575000
53467     53467     neimenggu      111.1906       40.2728           79       165     2012      07        03        185              0.000000      26.834290       0.320137       0.245061       0.125000       0.248300       0.187600       0.576000
53467     53467     neimenggu      111.1906       40.2728           79       165     2012      07        04        186              0.000000      26.740417       0.222383       0.237813       0.120000   -9999.000000       0.179500       0.643000
53467     53467     neimenggu      111.1906       40.2728           79       165     2012      07        05        187              0.000000      28.400818       0.067275       0.226589       0.120000   -9999.000000       0.165400   -9999.000000
53467     53467     neimenggu      111.1906       40.2728           79       165     2012      07        06        188              0.000000      29.638367       0.500239       0.214093       0.117000       0.165400       0.151000       0.511000
53467     53467     neimenggu      111.1906       40.2728           79       165     2012      07        07        189              0.000000      30.844940       1.479682       0.203867   -9999.000000   -9999.000000   -9999.000000       0.528000
53467     53467     neimenggu      111.1906       40.2728           79       165     2012      07        08        190              0.000000      26.823578       0.265419       0.220607       0.146000       0.197300       0.168100       0.576000
53467     53467     neimenggu      111.1906       40.2728           79       165     2012      07        09        191              0.000000      26.108032       0.000000       0.214292       0.116000   -9999.000000       0.199300       0.609000
53467     53467     neimenggu      111.1906       40.2728           79       165     2012      07        10        192              0.000000      27.344757       0.181775       0.204235       0.108000   -9999.000000       0.170900   -9999.000000
53467     53467     neimenggu      111.1906       40.2728           79       165     2012      07        11        193              0.000000      29.633636       0.000000       0.192823       0.118000       0.097200       0.171700       0.533000
53467     53467     neimenggu      111.1906       40.2728           79       165     2012      07        12        194              0.000000      30.010498       0.093733       0.184734       0.131000   -9999.000000       0.177900       0.517000
53467     53467     neimenggu      111.1906       40.2728           79       165     2012      07        13        195              0.000000      28.595367      10.865129       0.183228       0.119000   -9999.000000       0.190800       0.524000
53467     53467     neimenggu      111.1906       40.2728           79       165     2012      07        14        196              0.000000      29.478394       4.521300       0.201923       0.154500       0.165900       0.222900       0.719000
53467     53467     neimenggu      111.1906       40.2728           79       165     2012      07        15        197              0.000000      25.526489       0.000000       0.282659       0.115000   -9999.000000       0.194200   -9999.000000
53467     53467     neimenggu      111.1906       40.2728           79       165     2012      07        16        198              0.000000      27.284698       0.000000       0.247596       0.132000   -9999.000000       0.178600       0.629000
53467     53467     neimenggu      111.1906       40.2728           79       165     2012      07        17        199              0.000000      28.326447       0.000000       0.226967       0.124500   -9999.000000       0.176700       0.513000
53467     53467     neimenggu      111.1906       40.2728           79       165     2012      07        18        200              0.000000      28.222504       2.272883       0.213978       0.118000   -9999.000000       0.177200       0.478000
53467     53467     neimenggu      111.1906       40.2728           79       165     2012      07        19        201              0.000000      27.326111       0.040440       0.208193       0.129500       0.165400       0.191300       0.584000
53467     53467     neimenggu      111.1906       40.2728           79       165     2012      07        20        202              0.103000      28.572662      46.755726       0.200333       0.106000   -9999.000000       0.217500       0.612000
53467     53467     neimenggu      111.1906       40.2728           79       165     2012      07        21        203              0.206417      29.685669      16.358562       0.263115       0.238000   -9999.000000       0.283700       1.000000
53467     53467     neimenggu      111.1906       40.2728           79       165     2012      07        22        204              0.170083      21.839417       0.167797       0.368963       0.195000   -9999.000000       0.240600       0.761000
53467     53467     neimenggu      111.1906       40.2728           79       165     2012      07        23        205              0.156708      24.312531       0.305661       0.331224       0.173000   -9999.000000       0.276600       0.729000
53467     53467     neimenggu      111.1906       40.2728           79       165     2012      07        24        206              0.155875      25.161346      43.997204       0.316071       0.184000       0.323700   -9999.000000       0.714000
53467     53467     neimenggu      111.1906       40.2728           79       165     2012      07        25        207              0.202792      26.388885       8.325319       0.329588       0.204000   -9999.000000       0.362600       0.918000
53467     53467     neimenggu      111.1906       40.2728           79       165     2012      07        26        208              0.176167      25.463959       1.391574       0.375286       0.154000       0.546000       0.313100       0.828000
53467     53467     neimenggu      111.1906       40.2728           79       165     2012      07        27        209              0.181667      27.018372      26.815950       0.346835       0.175000   -9999.000000       0.295500       0.752000
53467     53467     neimenggu      111.1906       40.2728           79       165     2012      07        28        210              0.187208      25.253632       0.395716       0.364059       0.195500   -9999.000000       0.331100       0.932000
53467     53467     neimenggu      111.1906       40.2728           79       165     2012      07        29        211              0.166542      26.101318       0.426702       0.356240       0.156000       0.364800       0.298200       0.880000
53467     53467     neimenggu      111.1906       40.2728           79       165     2012      07        30        212              0.185625      25.902374      15.876487       0.339000       0.212500   -9999.000000       0.434700       1.000000
53467     53467     neimenggu      111.1906       40.2728           79       165     2012      07        31        213              0.177542      21.327118       0.000000       0.364651       0.161500   -9999.000000       0.368600       0.873000
53467     53467     neimenggu      111.1906       40.2728           79       165     2012      08        01        214              0.162250      25.271942       0.254564       0.345517       0.169000   -9999.000000       0.381500       0.913000
53467     53467     neimenggu      111.1906       40.2728           79       165     2012      08        02        215              0.153417      24.677094      10.999706       0.334476       0.206000       0.333700       0.320600       0.996000
53467     53467     neimenggu      111.1906       40.2728           79       165     2012      08        03        216              0.157292      25.772552       0.000000       0.346356       0.187000   -9999.000000       0.340800   -9999.000000
53467     53467     neimenggu      111.1906       40.2728           79       165     2012      08        04        217              0.138875      26.369598       0.000000       0.336165       0.174000   -9999.000000       0.333700       0.833000
53467     53467     neimenggu      111.1906       40.2728           79       165     2012      08        05        218              0.118042      27.407196      49.064144       0.323170       0.147000       0.242800       0.334300       0.740000
53467     53467     neimenggu      111.1906       40.2728           79       165     2012      08        06        219              0.110250      27.379852       7.336970       0.314383   -9999.000000       0.248800       0.344000       0.882000
53467     53467     neimenggu      111.1906       40.2728           79       165     2012      08        07        220              0.148333      24.402863       6.095268       0.333296       0.265000   -9999.000000       0.425800       0.958000
53467     53467     neimenggu      111.1906       40.2728           79       165     2012      08        08        221              0.148625      24.568817       0.196778       0.343818       0.178000       0.312200       0.346000   -9999.000000
53467     53467     neimenggu      111.1906       40.2728           79       165     2012      08        09        222              0.127417      25.534882       0.000000       0.325110       0.160000   -9999.000000       0.346800       0.861000
53467     53467     neimenggu      111.1906       40.2728           79       165     2012      08        10        223              0.133417      25.780731       5.572548       0.312357       0.128000   -9999.000000       0.333000       0.776000
53467     53467     neimenggu      111.1906       40.2728           79       165     2012      08        11        224              0.203292      25.055359      16.583336       0.315258       0.291000       0.188800       0.417700       0.990000
53467     53467     neimenggu      111.1906       40.2728           79       165     2012      08        12        225              0.197375      19.556091       0.000000       0.362298       0.199000   -9999.000000       0.390900       0.919000
53467     53467     neimenggu      111.1906       40.2728           79       165     2012      08        13        226              0.179478      23.771698       0.641077       0.333837       0.206000   -9999.000000       0.330500   -9999.000000
53467     53467     neimenggu      111.1906       40.2728           79       165     2012      08        14        227              0.170000      24.101013       4.073111       0.323519   -9999.000000   -9999.000000       0.355700       0.880000
53467     53467     neimenggu      111.1906       40.2728           79       165     2012      08        15        228              0.155375      22.567627       0.000000       0.332144       0.172500   -9999.000000       0.333400       0.783000
53467     53467     neimenggu      111.1906       40.2728           79       165     2012      08        16        229              0.142292      23.206879       0.000000       0.317344       0.166000       0.177400       0.331600       0.809000
53467     53467     neimenggu      111.1906       40.2728           79       165     2012      08        17        230              0.135208      24.791290       5.772043       0.310689       0.184000   -9999.000000       0.392100       0.724000
53467     53467     neimenggu      111.1906       40.2728           79       165     2012      08        18        231              0.137208      24.251923       0.164568       0.315811       0.226000   -9999.000000       0.381100   -9999.000000
53467     53467     neimenggu      111.1906       40.2728           79       165     2012      08        19        232              0.135375      23.221161       0.533425       0.321249       0.180000   -9999.000000       0.316800       0.852000
53467     53467     neimenggu      111.1906       40.2728           79       165     2012      08        20        233              0.125708      24.974060       0.000000       0.308058   -9999.000000       0.119600       0.386300       0.699000
53467     53467     neimenggu      111.1906       40.2728           79       165     2012      08        21        234              0.116792      21.010254       0.000000       0.299460       0.128000       0.379000   -9999.000000       0.766000
53467     53467     neimenggu      111.1906       40.2728           79       165     2012      08        22        235              0.110583      19.229614       0.000000       0.291868       0.139000   -9999.000000       0.359200   -9999.000000
53467     53467     neimenggu      111.1906       40.2728           79       165     2012      08        23        236              0.105083      20.639465       0.000000       0.286354       0.149000       0.466200       0.380600       0.745000
53467     53467     neimenggu      111.1906       40.2728           79       165     2012      08        24        237              0.099667      22.298676       0.000000       0.280751       0.161000       0.208200       0.352400       0.744000
53467     53467     neimenggu      111.1906       40.2728           79       165     2012      08        25        238              0.000000      22.987122       0.000000       0.275460       0.150000   -9999.000000       0.341200       0.727000
53467     53467     neimenggu      111.1906       40.2728           79       165     2012      08        26        239              0.095958      23.446014       0.449635       0.270856       0.166500       0.306300       0.350100       0.713000
53467     53467     neimenggu      111.1906       40.2728           79       165     2012      08        27        240              0.093417      24.786896       2.367345       0.265278       0.173500   -9999.000000       0.326800       0.713000
53467     53467     neimenggu      111.1906       40.2728           79       165     2012      08        28        241              0.091708      24.282959       0.000000       0.267829       0.158000   -9999.000000       0.283300       0.767000
53467     53467     neimenggu      111.1906       40.2728           79       165     2012      08        29        242              0.090417      24.518005       0.000000       0.259336       0.164000       0.215500       0.307400       0.648000
53467     53467     neimenggu      111.1906       40.2728           79       165     2012      08        30        243              0.090917      25.058411       1.402100       0.249942       0.161000   -9999.000000       0.290700       0.767000
53467     53467     neimenggu      111.1906       40.2728           79       165     2012      08        31        244              0.090875      24.959564       4.392070       0.245279       0.172000   -9999.000000       0.297400       0.731000
53467     53467     neimenggu      111.1906       40.2728           79       165     2012      09        01        245              0.200417      22.873779      30.021986       0.272917   -9999.000000       0.245300       0.435700   -9999.000000
53467     53467     neimenggu      111.1906       40.2728           79       165     2012      09        02        246              0.210792      16.691010       2.282787       0.362811       0.214000   -9999.000000       0.373700       0.907000
53467     53467     neimenggu      111.1906       40.2728           79       165     2012      09        03        247              0.196083      18.400757       0.000000       0.336204       0.199000       0.266500       0.318100       0.797000
53467     53467     neimenggu      111.1906       40.2728           79       165     2012      09        04        248              0.186542      16.825409       0.000000       0.320867   -9999.000000   -9999.000000       0.303600       0.880000
53467     53467     neimenggu      111.1906       40.2728           79       165     2012      09        05        249              0.179875      17.057861       0.000000       0.310981   -9999.000000   -9999.000000       0.269900       0.757000
53467     53467     neimenggu      111.1906       40.2728           79       165     2012      09        06        250              0.174167      18.865356       0.059983       0.303698       0.129000   -9999.000000       0.294900   -9999.000000
53467     53467     neimenggu      111.1906       40.2728           79       165     2012      09        07        251              0.168667      20.446320       0.000000       0.297436       0.137000       0.228500   -9999.000000       0.756000
53467     53467     neimenggu      111.1906       40.2728           79       165     2012      09        08        252              0.163917      20.302399       0.000000       0.292468       0.143000       0.293300       0.281100       0.687000
53467     53467     neimenggu      111.1906       40.2728           79       165     2012      09        09        253              0.159125      20.985352       0.344473       0.286869       0.147500   -9999.000000       0.284700       0.758000
53467     53467     neimenggu      111.1906       40.2728           79       165     2012      09        10        254              0.152000      21.370148       2.346704       0.280371       0.182000       0.411000       0.244500       0.747000
53467     53467     neimenggu      111.1906       40.2728           79       165     2012      09        11        255              0.152792      17.096100       0.000000       0.297035       0.167000       0.255400       0.223700   -9999.000000
53467     53467     neimenggu      111.1906       40.2728           79       165     2012      09        12        256              0.149000      16.071228       0.000000       0.289726       0.127000   -9999.000000       0.232500       0.622000
53467     53467     neimenggu      111.1906       40.2728           79       165     2012      09        13        257              0.146500      14.970581       0.992392       0.284054       0.138000       0.325100       0.246300       0.685000
53467     53467     neimenggu      111.1906       40.2728           79       165     2012      09        14        258              0.146625      14.579926       0.000000       0.288206       0.127000   -9999.000000       0.211700       0.740000
53467     53467     neimenggu      111.1906       40.2728           79       165     2012      09        15        259              0.144583      16.405243       0.000000       0.281685       0.135000   -9999.000000       0.237000       0.628000
53467     53467     neimenggu      111.1906       40.2728           79       165     2012      09        16        260              0.142375      17.136078       0.101991       0.275982       0.138000       0.223700       0.218900   -9999.000000
53467     53467     neimenggu      111.1906       40.2728           79       165     2012      09        17        261              0.142417      17.103363       0.364626       0.275638       0.137000   -9999.000000       0.229900       0.700000
53467     53467     neimenggu      111.1906       40.2728           79       165     2012      09        18        262              0.140667      18.364380       0.082968       0.274039       0.125000   -9999.000000       0.224100       0.643000
53467     53467     neimenggu      111.1906       40.2728           79       165     2012      09        19        263              0.137792      18.920532       0.000000       0.269196       0.129000   -9999.000000       0.227600       0.713000
53467     53467     neimenggu      111.1906       40.2728           79       165     2012      09        20        264              0.135333      19.008514       3.057418       0.263295       0.158500   -9999.000000       0.279300       0.636000
53467     53467     neimenggu      111.1906       40.2728           79       165     2012      09        21        265              0.137792      19.153198       0.720543       0.269268   -9999.000000       0.222100       0.258800       0.776000
53467     53467     neimenggu      111.1906       40.2728           79       165     2012      09        22        266              0.141125      17.653656       0.269462       0.283408       0.118000   -9999.000000       0.245400       0.631000
53467     53467     neimenggu      111.1906       40.2728           79       165     2012      09        23        267              0.141792      18.841644       1.011341       0.275986       0.105500       0.219900       0.241100       0.680000
53467     53467     neimenggu      111.1906       40.2728           79       165     2012      09        24        268              0.168750      19.552887      21.465286       0.269016   -9999.000000   -9999.000000   -9999.000000       1.000000
53467     53467     neimenggu      111.1906       40.2728           79       165     2012      09        25        269              0.228375      17.286346       0.243407       0.317182   -9999.000000   -9999.000000       0.218300       0.861000
53467     53467     neimenggu      111.1906       40.2728           79       165     2012      09        26        270              0.209208      15.799988       1.402814       0.330968   -9999.000000       0.398400       0.227300       0.893000
53467     53467     neimenggu      111.1906       40.2728           79       165     2012      09        27        271              0.198714      16.496094       0.029588       0.317221   -9999.000000   -9999.000000       0.221500       0.666000
53467     53467     neimenggu      111.1906       40.2728           79       165     2012      09        28        272              0.181133      12.961456       0.000000       0.307624       0.123000   -9999.000000       0.199300       0.867000
53467     53467     neimenggu      111.1906       40.2728           79       165     2012      09        29        273              0.177250      12.626648       0.000000       0.300739       0.121000   -9999.000000       0.214300       0.670000
53467     53467     neimenggu      111.1906       40.2728           79       165     2012      09        30        274              0.171167      13.223816       0.000000       0.295659       0.115000   -9999.000000       0.192500   -9999.000000
53467     53467     neimenggu      111.1906       40.2728           79       165     2012      10        01        275              0.166625      13.822296       0.000000       0.291252   -9999.000000   -9999.000000       0.163900       0.716000
53467     53467     neimenggu      111.1906       40.2728           79       165     2012      10        02        276              0.158167      15.172974       0.000000       0.286807   -9999.000000   -9999.000000       0.172000       0.651000
53467     53467     neimenggu      111.1906       40.2728           79       165     2012      10        03        277              0.153042      14.947662       0.774876       0.281957       0.092000   -9999.000000       0.156900       0.702000
53467     53467     neimenggu      111.1906       40.2728           79       165     2012      10        04        278              0.189667      14.549927       3.534878       0.278823   -9999.000000       0.235200       0.198400       0.866000
53467     53467     neimenggu      111.1906       40.2728           79       165     2012      10        05        279              0.193708      10.925476       0.035118       0.300808       0.135000   -9999.000000   -9999.000000   -9999.000000
53467     53467     neimenggu      111.1906       40.2728           79       165     2012      10        06        280              0.186750      12.094849       0.212109       0.294361       0.129000   -9999.000000       0.171300       0.830000
53467     53467     neimenggu      111.1906       40.2728           79       165     2012      10        07        281              0.180708      13.946655       0.000000       0.287752       0.119000   -9999.000000       0.190700       0.711000
53467     53467     neimenggu      111.1906       40.2728           79       165     2012      10        08        282              0.183542      14.468170       3.184577       0.285556   -9999.000000   -9999.000000       0.153800       0.786000
53467     53467     neimenggu      111.1906       40.2728           79       165     2012      10        09        283              0.182958      13.780243       0.040882       0.298384   -9999.000000       0.307100       0.160300       0.692000
53467     53467     neimenggu      111.1906       40.2728           79       165     2012      10        10        284              0.175667      10.969604       0.122638       0.291594       0.114000   -9999.000000       0.168900   -9999.000000
53467     53467     neimenggu      111.1906       40.2728           79       165     2012      10        11        285              0.170875      11.053986       0.050786       0.287300       0.097000       0.275500       0.157400       0.743000
53467     53467     neimenggu      111.1906       40.2728           79       165     2012      10        12        286              0.165333      12.476990       0.000000       0.282838   -9999.000000   -9999.000000       0.149400       0.673000
53467     53467     neimenggu      111.1906       40.2728           79       165     2012      10        13        287              0.158833      11.833588       0.000000       0.278344   -9999.000000   -9999.000000       0.162800       0.735000
53467     53467     neimenggu      111.1906       40.2728           79       165     2012      10        14        288              0.159500       9.346069       1.594640       0.275339       0.102000       0.119000       0.148500       0.817000
53467     53467     neimenggu      111.1906       40.2728           79       165     2012      10        15        289              0.188292      11.843964       1.788195       0.283075       0.109000   -9999.000000       0.137100   -9999.000000
53467     53467     neimenggu      111.1906       40.2728           79       165     2012      10        16        290              0.217792      11.886383       0.000000       0.291391   -9999.000000       0.337600       0.198700       0.808000
53467     53467     neimenggu      111.1906       40.2728           79       165     2012      10        17        291              0.202125       6.650208       1.421012       0.286958   -9999.000000   -9999.000000       0.145400       0.635000
53467     53467     neimenggu      111.1906       40.2728           79       165     2012      10        18        292              0.194833       7.007355       0.043441       0.289984   -9999.000000       0.198800       0.143300       0.637000
53467     53467     neimenggu      111.1906       40.2728           79       165     2012      10        19        293              0.192375       6.894745       0.043494       0.285643       0.119000       0.370500       0.156100       0.622000
53467     53467     neimenggu      111.1906       40.2728           79       165     2012      10        20        294              0.196042       9.765472       2.473648       0.283061       0.101000   -9999.000000       0.146900       0.616000
53467     53467     neimenggu      111.1906       40.2728           79       165     2012      10        21        295              0.227750      11.424561       2.658536       0.286019   -9999.000000   -9999.000000       0.205500       0.833000
53467     53467     neimenggu      111.1906       40.2728           79       165     2012      10        22        296              0.205500       6.494690       0.104536       0.306047   -9999.000000       0.376000   -9999.000000       0.706000
53467     53467     neimenggu      111.1906       40.2728           79       165     2012      10        23        297              0.197167       7.703461       0.000000       0.294970   -9999.000000   -9999.000000       0.138400       0.718000
53467     53467     neimenggu      111.1906       40.2728           79       165     2012      10        24        298              0.190542       8.916046       0.000000       0.290679   -9999.000000       0.423100       0.153100       0.596000
53467     53467     neimenggu      111.1906       40.2728           79       165     2012      10        25        299              0.000000       9.291809       0.075071       0.287129   -9999.000000   -9999.000000       0.144200       0.688000
53467     53467     neimenggu      111.1906       40.2728           79       165     2012      10        26        300              0.183625       9.973022       0.000000       0.284759   -9999.000000   -9999.000000       0.136100       0.690000
53467     53467     neimenggu      111.1906       40.2728           79       165     2012      10        27        301              0.183250       8.080994       0.000000       0.285280   -9999.000000       0.354600       0.154600       0.711000
53467     53467     neimenggu      111.1906       40.2728           79       165     2012      10        28        302              0.000000       7.666504       1.408094       0.284134   -9999.000000   -9999.000000       0.141800       0.618000
53467     53467     neimenggu      111.1906       40.2728           79       165     2012      10        29        303              0.176708       8.716370       0.000000       0.282697   -9999.000000       0.332800       0.115600   -9999.000000
53467     53467     neimenggu      111.1906       40.2728           79       165     2012      10        30        304              0.171583       5.460754       0.532072       0.271078   -9999.000000   -9999.000000       0.120700       0.573000
53467     53467     neimenggu      111.1906       40.2728           79       165     2012      10        31        305              0.170125       4.376373       0.000000       0.273679   -9999.000000       0.145700       0.131600       0.544000
53467     53467     neimenggu      111.1906       40.2728           79       165     2012      11        01        306              0.170458       5.426758       0.000000       0.275819   -9999.000000       0.262700       0.131200       0.674000
53467     53467     neimenggu      111.1906       40.2728           79       165     2012      11        02        307              0.173667       6.314362       0.899541       0.278699   -9999.000000   -9999.000000       0.125300       0.675000
53467     53467     neimenggu      111.1906       40.2728           79       165     2012      11        03        308              0.190583       8.135712       0.133503       0.280165   -9999.000000   -9999.000000       0.098400   -9999.000000
53467     53467     neimenggu      111.1906       40.2728           79       165     2012      11        04        309              0.190250       0.212067       0.046264       0.230904   -9999.000000       0.167000       0.085400       0.535000
53467     53467     neimenggu      111.1906       40.2728           79       165     2012      11        05        310              0.189125      -1.673340       0.000000       0.192477   -9999.000000       0.150500       0.087800       0.475000
53467     53467     neimenggu      111.1906       40.2728           79       165     2012      11        06        311              0.191000      -1.445496       0.000000       0.192406   -9999.000000       0.127000       0.094800       0.590000
53467     53467     neimenggu      111.1906       40.2728           79       165     2012      11        07        312              0.195833      -0.004547       0.000000       0.210915   -9999.000000   -9999.000000       0.103700       0.463000
53467     53467     neimenggu      111.1906       40.2728           79       165     2012      11        08        313              0.196375       1.109955       0.000000       0.231256   -9999.000000       0.197600   -9999.000000   -9999.000000
53467     53467     neimenggu      111.1906       40.2728           79       165     2012      11        09        314              0.208125       2.727692       0.137687       0.258309   -9999.000000   -9999.000000       0.076900       0.511000
53467     53467     neimenggu      111.1906       40.2728           79       165     2012      11        10        315              0.209708       1.558899       0.490586       0.262314   -9999.000000       0.264300       0.071100       0.578000
53467     53467     neimenggu      111.1906       40.2728           79       165     2012      11        11        316              0.194708      -1.220978       0.429951       0.210936   -9999.000000       0.155500       0.067900       0.504000
53467     53467     neimenggu      111.1906       40.2728           79       165     2012      11        12        317              0.184333      -2.762604       0.346171       0.174932   -9999.000000       0.169700       0.052800       0.490000
53467     53467     neimenggu      111.1906       40.2728           79       165     2012      11        13        318              0.000000      -2.660919       0.205410       0.177665   -9999.000000   -9999.000000       0.054100       0.412000
53467     53467     neimenggu      111.1906       40.2728           79       165     2012      11        14        319              0.164167      -3.361206       0.000000       0.170424   -9999.000000       0.073900       0.064500       0.494000
53467     53467     neimenggu      111.1906       40.2728           79       165     2012      11        15        320              0.168750      -2.324341       0.000000       0.178328   -9999.000000   -9999.000000       0.050400       0.440000
53467     53467     neimenggu      111.1906       40.2728           79       165     2012      11        16        321              0.178542      -1.751160       0.273612       0.181820   -9999.000000       0.119300       0.058500       0.454000
53467     53467     neimenggu      111.1906       40.2728           79       165     2012      11        17        322              0.000000      -3.018250       0.000000       0.175765   -9999.000000       0.169300       0.055800       0.468000
53467     53467     neimenggu      111.1906       40.2728           79       165     2012      11        18        323              0.174958      -2.730988       0.000000       0.174658   -9999.000000       0.206400       0.053500       0.457000
53467     53467     neimenggu      111.1906       40.2728           79       165     2012      11        19        324              0.160375      -1.904114       0.000000       0.190808   -9999.000000       0.059100       0.044500       0.462000
53467     53467     neimenggu      111.1906       40.2728           79       165     2012      11        20        325              0.152042      -2.928558       0.000000       0.173265   -9999.000000   -9999.000000       0.044300       0.466000
53467     53467     neimenggu      111.1906       40.2728           79       165     2012      11        21        326              0.163000      -1.605652       0.000000       0.185465   -9999.000000       0.120500       0.045200       0.525000
53467     53467     neimenggu      111.1906       40.2728           79       165     2012      11        22        327              0.159250      -0.274109       0.000000       0.207989   -9999.000000   -9999.000000       0.039400       0.436000
53467     53467     neimenggu      111.1906       40.2728           79       165     2012      11        23        328              0.103833      -2.554626       0.000000       0.186530   -9999.000000       0.148100       0.044100       0.413000
53467     53467     neimenggu      111.1906       40.2728           79       165     2012      11        24        329              0.085958      -4.444855       0.000000       0.158269   -9999.000000       0.082800       0.043800       0.426000
53467     53467     neimenggu      111.1906       40.2728           79       165     2012      11        25        330              0.080583      -3.217560       0.000000       0.168264   -9999.000000   -9999.000000   -9999.000000       0.479000
53467     53467     neimenggu      111.1906       40.2728           79       165     2012      11        26        331              0.074500      -3.852295       0.000000       0.165111   -9999.000000       0.120900   -9999.000000       0.449000
53467     53467     neimenggu      111.1906       40.2728           79       165     2012      11        27        332              0.070708      -3.267731       0.000000       0.167615   -9999.000000       0.119900       0.054100   -9999.000000
53467     53467     neimenggu      111.1906       40.2728           79       165     2012      11        28        333              0.063708      -3.342133       0.000000       0.171687   -9999.000000       0.219100       0.045500       0.405000
53467     53467     neimenggu      111.1906       40.2728           79       165     2012      11        29        334              0.060833      -5.866852       0.000000       0.151440   -9999.000000       0.041600       0.043300       0.373000
53467     53467     neimenggu      111.1906       40.2728           79       165     2012      11        30        335              0.060583      -6.065125       0.000000       0.149070   -9999.000000       0.139900       0.044500       0.395000
53467     53467     neimenggu      111.1906       40.2728           79       165     2012      12        01        336              0.063875      -5.031830       0.157079       0.149499   -9999.000000   -9999.000000       0.038700       0.446000
53467     53467     neimenggu      111.1906       40.2728           79       165     2012      12        02        337              0.064083      -3.426880       0.000000       0.167060   -9999.000000       0.022800       0.038800   -9999.000000
53467     53467     neimenggu      111.1906       40.2728           79       165     2012      12        03        338              0.060083      -3.714661       0.045325       0.165110   -9999.000000       0.209000       0.046000       0.388000
53467     53467     neimenggu      111.1906       40.2728           79       165     2012      12        04        339              0.059375      -6.231049       0.000000       0.149596   -9999.000000       0.082200       0.039800       0.386000
53467     53467     neimenggu      111.1906       40.2728           79       165     2012      12        05        340              0.056333      -5.949799       0.000000       0.149272   -9999.000000       0.083600       0.048400       0.338000
53467     53467     neimenggu      111.1906       40.2728           79       165     2012      12        06        341              0.057417      -7.815094       0.047316       0.145761   -9999.000000       0.125900   -9999.000000       0.357000
53467     53467     neimenggu      111.1906       40.2728           79       165     2012      12        07        342              0.055208      -6.917938       0.000000       0.145918   -9999.000000   -9999.000000       0.041900   -9999.000000
53467     53467     neimenggu      111.1906       40.2728           79       165     2012      12        08        343              0.051958      -9.113373       0.000000       0.144081   -9999.000000   -9999.000000       0.048700       0.290000
53467     53467     neimenggu      111.1906       40.2728           79       165     2012      12        09        344              0.052667     -10.754547       0.000000       0.140300   -9999.000000   -9999.000000       0.041200       0.372000
53467     53467     neimenggu      111.1906       40.2728           79       165     2012      12        10        345              0.053083      -9.447327       0.000000       0.140596   -9999.000000   -9999.000000       0.041100       0.296000
53467     53467     neimenggu      111.1906       40.2728           79       165     2012      12        11        346              0.054250      -7.794037       0.000000       0.141439   -9999.000000       0.170300       0.044400       0.315000
53467     53467     neimenggu      111.1906       40.2728           79       165     2012      12        12        347              0.055208      -6.761078       0.000000       0.142836   -9999.000000   -9999.000000       0.040900       0.160000
53467     53467     neimenggu      111.1906       40.2728           79       165     2012      12        13        348              0.058167      -5.402954       0.000000       0.153568   -9999.000000   -9999.000000       0.037600       0.294000
53467     53467     neimenggu      111.1906       40.2728           79       165     2012      12        14        349              0.063792      -3.592102       0.197378       0.163227   -9999.000000   -9999.000000       0.031000       0.355000
53467     53467     neimenggu      111.1906       40.2728           79       165     2012      12        15        350              0.000000      -2.382874       0.000000       0.172804   -9999.000000       0.092200       0.035500       0.345000
53467     53467     neimenggu      111.1906       40.2728           79       165     2012      12        16        351              0.065583      -2.074188       0.000000       0.180098   -9999.000000       0.125700       0.031600       0.272000
53467     53467     neimenggu      111.1906       40.2728           79       165     2012      12        17        352              0.055417      -3.294708       0.000000       0.178436   -9999.000000       0.154500       0.029000       0.261000
53467     53467     neimenggu      111.1906       40.2728           79       165     2012      12        18        353              0.054375      -8.216461       0.000000       0.145486   -9999.000000   -9999.000000       0.031900       0.281000
53467     53467     neimenggu      111.1906       40.2728           79       165     2012      12        19        354              0.054875      -8.669830       0.000000       0.142263   -9999.000000   -9999.000000       0.034000       0.285000
53467     53467     neimenggu      111.1906       40.2728           79       165     2012      12        20        355              0.000000      -6.594482       0.000000       0.144231   -9999.000000   -9999.000000       0.036000       0.261000
53467     53467     neimenggu      111.1906       40.2728           79       165     2012      12        21        356              0.056375      -7.348511       0.000000       0.143250   -9999.000000   -9999.000000       0.032300       0.141000
53467     53467     neimenggu      111.1906       40.2728           79       165     2012      12        22        357              0.055000     -11.188660       0.000000       0.141063   -9999.000000   -9999.000000       0.038100       0.206000
53467     53467     neimenggu      111.1906       40.2728           79       165     2012      12        23        358              0.053917     -14.698303       0.000000       0.137758   -9999.000000   -9999.000000   -9999.000000       0.222000
53467     53467     neimenggu      111.1906       40.2728           79       165     2012      12        24        359              0.052600     -16.914978       0.057672       0.134707   -9999.000000   -9999.000000       0.040000       0.203000
53467     53467     neimenggu      111.1906       40.2728           79       165     2012      12        25        360              0.052500     -16.056854       0.000000       0.134092   -9999.000000   -9999.000000       0.041600       0.231000
53467     53467     neimenggu      111.1906       40.2728           79       165     2012      12        26        361              0.000000     -15.208008       0.000000       0.134027   -9999.000000   -9999.000000       0.031100   -9999.000000
53467     53467     neimenggu      111.1906       40.2728           79       165     2012      12        27        362              0.053900     -12.943848       0.030480       0.134982   -9999.000000   -9999.000000       0.032900       0.172000
53467     53467     neimenggu      111.1906       40.2728           79       165     2012      12        28        363              0.000000      -9.548920       0.000000       0.135834   -9999.000000   -9999.000000       0.038000       0.237000
53467     53467     neimenggu      111.1906       40.2728           79       165     2012      12        29        364              0.000000      -9.654633       0.000000       0.136437   -9999.000000   -9999.000000       0.040800       0.217000
53467     53467     neimenggu      111.1906       40.2728           79       165     2012      12        30        365              0.000000     -12.281769       0.000000       0.135843   -9999.000000   -9999.000000       0.034700       0.217000
53467     53467     neimenggu      111.1906       40.2728           79       165     2012      12        31        366              0.054267     -11.204803       0.000000       0.135896   -9999.000000   -9999.000000       0.032600   -9999.000000
