# Supplementary material for: Research on Fusing Multisatellite Soil Moisture Data Based on Bayesian Model Averaging
Source: Hindawi journal article supplement (doi:10.1155/2018/9310838), 2018-06-25
Supplement: f1 [file 9310838.f1.zip › 2012_sm00-10cm_daily_ZDB_ZHY_53475_366days_allin.txt]

53475     53475     neimenggu      112.4747       40.5231           78       170     2012      01        01        001              0.000000   -9999.000000       0.000000   -9999.000000   -9999.000000   -9999.000000       0.032000   -9999.000000
53475     53475     neimenggu      112.4747       40.5231           78       170     2012      01        02        002              0.000000      -9.170502       0.000000       0.092160   -9999.000000   -9999.000000       0.034200       0.017000
53475     53475     neimenggu      112.4747       40.5231           78       170     2012      01        03        003              0.000000     -12.037079       0.000000       0.091563   -9999.000000   -9999.000000       0.033800       0.016000
53475     53475     neimenggu      112.4747       40.5231           78       170     2012      01        04        004              0.000000     -13.942780       0.000000       0.090820   -9999.000000   -9999.000000       0.039300   -9999.000000
53475     53475     neimenggu      112.4747       40.5231           78       170     2012      01        05        005              0.000000     -12.789551       0.000000       0.090709   -9999.000000   -9999.000000       0.035800       0.073000
53475     53475     neimenggu      112.4747       40.5231           78       170     2012      01        06        006              0.000000     -12.111969       0.000000       0.090658   -9999.000000   -9999.000000       0.031100       0.047000
53475     53475     neimenggu      112.4747       40.5231           78       170     2012      01        07        007              0.000000     -11.869080      10.088745       0.090541   -9999.000000   -9999.000000       0.034200       0.037000
53475     53475     neimenggu      112.4747       40.5231           78       170     2012      01        08        008              0.000000     -11.238434       4.396955       0.090890   -9999.000000   -9999.000000       0.032300       0.043000
53475     53475     neimenggu      112.4747       40.5231           78       170     2012      01        09        009              0.000000     -11.391022       0.816872       0.090711   -9999.000000   -9999.000000   -9999.000000       0.048000
53475     53475     neimenggu      112.4747       40.5231           78       170     2012      01        10        010              0.000000     -11.288849       0.000000       0.090632   -9999.000000   -9999.000000       0.039000       0.035000
53475     53475     neimenggu      112.4747       40.5231           78       170     2012      01        11        011              0.000000     -12.985565       1.032740       0.090499   -9999.000000   -9999.000000       0.038200       0.021000
53475     53475     neimenggu      112.4747       40.5231           78       170     2012      01        12        012              0.000000     -11.856232       0.000000       0.090506   -9999.000000   -9999.000000       0.036000       0.045000
53475     53475     neimenggu      112.4747       40.5231           78       170     2012      01        13        013              0.000000     -10.899170       0.000000       0.090747   -9999.000000   -9999.000000       0.033700       0.048000
53475     53475     neimenggu      112.4747       40.5231           78       170     2012      01        14        014              0.000000     -10.413849       0.000000       0.090819   -9999.000000   -9999.000000       0.035700       0.118000
53475     53475     neimenggu      112.4747       40.5231           78       170     2012      01        15        015              0.000000      -9.554626       0.000000       0.091381   -9999.000000   -9999.000000       0.038100       0.070000
53475     53475     neimenggu      112.4747       40.5231           78       170     2012      01        16        016              0.000000      -9.014893       0.000000       0.093440   -9999.000000   -9999.000000       0.039200       0.006000
53475     53475     neimenggu      112.4747       40.5231           78       170     2012      01        17        017              0.000000      -8.708374       0.000000       0.093916   -9999.000000   -9999.000000       0.030000       0.093000
53475     53475     neimenggu      112.4747       40.5231           78       170     2012      01        18        018              0.000000      -9.565399       0.000000       0.092761   -9999.000000   -9999.000000       0.033800   -9999.000000
53475     53475     neimenggu      112.4747       40.5231           78       170     2012      01        19        019              0.000000      -9.097443       0.000000       0.091539   -9999.000000   -9999.000000       0.034800       0.132000
53475     53475     neimenggu      112.4747       40.5231           78       170     2012      01        20        020              0.000000      -9.570251       0.000000       0.091568   -9999.000000   -9999.000000       0.030800       0.034000
53475     53475     neimenggu      112.4747       40.5231           78       170     2012      01        21        021              0.000000     -14.460175       0.000000       0.090322   -9999.000000   -9999.000000       0.037400       0.053000
53475     53475     neimenggu      112.4747       40.5231           78       170     2012      01        22        022              0.000000     -14.999878       0.000000       0.089426   -9999.000000   -9999.000000       0.035600       0.058000
53475     53475     neimenggu      112.4747       40.5231           78       170     2012      01        23        023              0.000000     -15.683258       0.000000       0.089333   -9999.000000   -9999.000000       0.031600   -9999.000000
53475     53475     neimenggu      112.4747       40.5231           78       170     2012      01        24        024              0.000000     -14.597626       0.000000       0.089584   -9999.000000   -9999.000000   -9999.000000       0.155000
53475     53475     neimenggu      112.4747       40.5231           78       170     2012      01        25        025              0.000000     -13.640137       0.000000       0.089993   -9999.000000   -9999.000000       0.032600       0.054000
53475     53475     neimenggu      112.4747       40.5231           78       170     2012      01        26        026              0.000000     -11.543823       0.000000       0.090449   -9999.000000   -9999.000000       0.040700       0.105000
53475     53475     neimenggu      112.4747       40.5231           78       170     2012      01        27        027              0.000000     -10.907135       0.000000       0.090500   -9999.000000   -9999.000000       0.037500       0.090000
53475     53475     neimenggu      112.4747       40.5231           78       170     2012      01        28        028              0.000000      -9.491760       0.000000       0.090924   -9999.000000   -9999.000000       0.037900   -9999.000000
53475     53475     neimenggu      112.4747       40.5231           78       170     2012      01        29        029              0.000000     -11.567719       0.000000       0.089910   -9999.000000   -9999.000000       0.032600       0.143000
53475     53475     neimenggu      112.4747       40.5231           78       170     2012      01        30        030              0.000000     -11.800262       0.000000       0.089272   -9999.000000   -9999.000000       0.036600       0.054000
53475     53475     neimenggu      112.4747       40.5231           78       170     2012      01        31        031              0.000000      -9.635529       0.000000       0.090128   -9999.000000   -9999.000000       0.035000       0.062000
53475     53475     neimenggu      112.4747       40.5231           78       170     2012      02        01        032              0.000000     -11.323853       0.000000       0.089317   -9999.000000   -9999.000000       0.044100       0.061000
53475     53475     neimenggu      112.4747       40.5231           78       170     2012      02        02        033              0.000000     -13.784943       0.000000       0.088511   -9999.000000   -9999.000000       0.044900   -9999.000000
53475     53475     neimenggu      112.4747       40.5231           78       170     2012      02        03        034              0.000000     -12.550018       0.000000       0.088603   -9999.000000   -9999.000000       0.035500       0.152000
53475     53475     neimenggu      112.4747       40.5231           78       170     2012      02        04        035              0.000000     -11.731812       0.000000       0.088930   -9999.000000   -9999.000000       0.036800       0.076000
53475     53475     neimenggu      112.4747       40.5231           78       170     2012      02        05        036              0.000000      -9.304901       0.000000       0.090250   -9999.000000   -9999.000000       0.036800       0.080000
53475     53475     neimenggu      112.4747       40.5231           78       170     2012      02        06        037              0.000000      -8.297028       0.000000       0.093831   -9999.000000   -9999.000000       0.040400       0.109000
53475     53475     neimenggu      112.4747       40.5231           78       170     2012      02        07        038              0.000000     -14.570007       0.000000       0.088674   -9999.000000   -9999.000000       0.045700       0.112000
53475     53475     neimenggu      112.4747       40.5231           78       170     2012      02        08        039              0.000000     -13.584930       0.000000       0.088615   -9999.000000   -9999.000000       0.043300       0.032000
53475     53475     neimenggu      112.4747       40.5231           78       170     2012      02        09        040              0.000000     -11.852448       0.000000       0.089087   -9999.000000   -9999.000000       0.038500       0.055000
53475     53475     neimenggu      112.4747       40.5231           78       170     2012      02        10        041              0.000000     -11.627380       0.000000       0.089024   -9999.000000   -9999.000000       0.040700       0.109000
53475     53475     neimenggu      112.4747       40.5231           78       170     2012      02        11        042              0.000000     -10.576202       0.000000       0.089563   -9999.000000   -9999.000000       0.041200       0.085000
53475     53475     neimenggu      112.4747       40.5231           78       170     2012      02        12        043              0.000000      -7.957855       0.000000       0.099903   -9999.000000   -9999.000000   -9999.000000       0.153000
53475     53475     neimenggu      112.4747       40.5231           78       170     2012      02        13        044              0.000000      -6.979584       0.000000       0.098243   -9999.000000   -9999.000000   -9999.000000       0.083000
53475     53475     neimenggu      112.4747       40.5231           78       170     2012      02        14        045              0.000000      -5.556549       0.000000       0.116178   -9999.000000   -9999.000000       0.049200       0.010000
53475     53475     neimenggu      112.4747       40.5231           78       170     2012      02        15        046              0.000000      -7.301483       0.000000       0.111066   -9999.000000   -9999.000000       0.039500       0.085000
53475     53475     neimenggu      112.4747       40.5231           78       170     2012      02        16        047              0.000000      -8.756927       0.000000       0.100806   -9999.000000   -9999.000000       0.043300   -9999.000000
53475     53475     neimenggu      112.4747       40.5231           78       170     2012      02        17        048              0.000000     -10.943451       0.000000       0.094494   -9999.000000   -9999.000000       0.045900       0.160000
53475     53475     neimenggu      112.4747       40.5231           78       170     2012      02        18        049              0.000000     -10.209473       0.000000       0.094707   -9999.000000   -9999.000000       0.047800       0.066000
53475     53475     neimenggu      112.4747       40.5231           78       170     2012      02        19        050              0.000000      -9.313354       0.000000       0.097527   -9999.000000   -9999.000000       0.046600       0.122000
53475     53475     neimenggu      112.4747       40.5231           78       170     2012      02        20        051              0.000000      -7.924164       0.000000       0.102867   -9999.000000   -9999.000000       0.044800       0.191000
53475     53475     neimenggu      112.4747       40.5231           78       170     2012      02        21        052              0.000000      -4.738129       0.076228       0.132874   -9999.000000   -9999.000000   -9999.000000   -9999.000000
53475     53475     neimenggu      112.4747       40.5231           78       170     2012      02        22        053              0.000000      -0.139648       0.225172       0.160336   -9999.000000   -9999.000000       0.048500       0.294000
53475     53475     neimenggu      112.4747       40.5231           78       170     2012      02        23        054              0.000000      -3.263123       0.000000       0.152299   -9999.000000   -9999.000000       0.048200       0.186000
53475     53475     neimenggu      112.4747       40.5231           78       170     2012      02        24        055              0.000000      -1.444702       0.000000       0.149021   -9999.000000   -9999.000000       0.051000       0.143000
53475     53475     neimenggu      112.4747       40.5231           78       170     2012      02        25        056              0.000000      -5.058289       0.000000       0.132678   -9999.000000   -9999.000000       0.050300       0.098000
53475     53475     neimenggu      112.4747       40.5231           78       170     2012      02        26        057              0.000000      -6.097473       0.000000       0.112430   -9999.000000   -9999.000000       0.047000   -9999.000000
53475     53475     neimenggu      112.4747       40.5231           78       170     2012      02        27        058              0.000000      -4.686768       1.185627       0.133134   -9999.000000   -9999.000000   -9999.000000       0.264000
53475     53475     neimenggu      112.4747       40.5231           78       170     2012      02        28        059              0.000000      -3.682983       0.475370       0.138163       0.076000   -9999.000000       0.049600       0.138000
53475     53475     neimenggu      112.4747       40.5231           78       170     2012      02        29        060              0.000000   -9999.000000       0.000000   -9999.000000       0.077000   -9999.000000   -9999.000000   -9999.000000
53475     53475     neimenggu      112.4747       40.5231           78       170     2012      03        01        061              0.000000      -0.958588       0.000000       0.156992   -9999.000000   -9999.000000       0.051400       0.154000
53475     53475     neimenggu      112.4747       40.5231           78       170     2012      03        02        062              0.000000      -2.163849       0.279414       0.147978   -9999.000000       0.032500       0.053500   -9999.000000
53475     53475     neimenggu      112.4747       40.5231           78       170     2012      03        03        063              0.000000      -1.962494       0.625459       0.135888   -9999.000000   -9999.000000       0.058800       0.265000
53475     53475     neimenggu      112.4747       40.5231           78       170     2012      03        04        064              0.000000      -1.278992       0.345691       0.149954   -9999.000000       0.066300       0.064100       0.167000
53475     53475     neimenggu      112.4747       40.5231           78       170     2012      03        05        065              0.000000      -1.023407       9.211289       0.153017   -9999.000000   -9999.000000   -9999.000000       0.160000
53475     53475     neimenggu      112.4747       40.5231           78       170     2012      03        06        066              0.000000      -5.190521       0.000000       0.124535   -9999.000000   -9999.000000       0.046900       0.106000
53475     53475     neimenggu      112.4747       40.5231           78       170     2012      03        07        067              0.000000      -4.352936       0.000000       0.117970   -9999.000000       0.040000       0.048100       0.335000
53475     53475     neimenggu      112.4747       40.5231           78       170     2012      03        08        068              0.000000      -4.665680       0.417950       0.127602   -9999.000000   -9999.000000       0.046400       0.165000
53475     53475     neimenggu      112.4747       40.5231           78       170     2012      03        09        069              0.000000      -4.747894       0.210317       0.126304   -9999.000000   -9999.000000       0.050200       0.190000
53475     53475     neimenggu      112.4747       40.5231           78       170     2012      03        10        070              0.000000      -1.944366       0.000000       0.150723   -9999.000000       0.191900       0.045500       0.156000
53475     53475     neimenggu      112.4747       40.5231           78       170     2012      03        11        071              0.000000      -6.702484       0.000000       0.116685       0.082000   -9999.000000       0.046400       0.087000
53475     53475     neimenggu      112.4747       40.5231           78       170     2012      03        12        072              0.000000      -4.744843       0.000000       0.128917   -9999.000000   -9999.000000       0.049200       0.325000
53475     53475     neimenggu      112.4747       40.5231           78       170     2012      03        13        073              0.000000      -1.693848       0.097978       0.149231   -9999.000000   -9999.000000       0.048400       0.135000
53475     53475     neimenggu      112.4747       40.5231           78       170     2012      03        14        074              0.000000       0.268646       2.025024       0.169547   -9999.000000   -9999.000000   -9999.000000       0.268000
53475     53475     neimenggu      112.4747       40.5231           78       170     2012      03        15        075              0.000000       1.686005       0.175152       0.174528   -9999.000000       0.090300       0.068600       0.458000
53475     53475     neimenggu      112.4747       40.5231           78       170     2012      03        16        076              0.000000       1.636047       0.000000       0.189027       0.135000   -9999.000000       0.084500   -9999.000000
53475     53475     neimenggu      112.4747       40.5231           78       170     2012      03        17        077              0.000000       2.841064       0.000000       0.200579       0.142000   -9999.000000       0.057500       0.709000
53475     53475     neimenggu      112.4747       40.5231           78       170     2012      03        18        078              0.000000       2.414886       0.287311       0.189402   -9999.000000   -9999.000000       0.057400       0.371000
53475     53475     neimenggu      112.4747       40.5231           78       170     2012      03        19        079              0.000000       1.175537       0.392441       0.177750   -9999.000000   -9999.000000       0.054900       0.538000
53475     53475     neimenggu      112.4747       40.5231           78       170     2012      03        20        080              0.000000       3.013245       0.183128       0.195095       0.104000       0.014200       0.065400       0.376000
53475     53475     neimenggu      112.4747       40.5231           78       170     2012      03        21        081              0.000000       3.664917       0.195695       0.199128   -9999.000000   -9999.000000       0.080300   -9999.000000
53475     53475     neimenggu      112.4747       40.5231           78       170     2012      03        22        082              0.000000       2.148560       0.258152       0.202056   -9999.000000   -9999.000000   -9999.000000       0.712000
53475     53475     neimenggu      112.4747       40.5231           78       170     2012      03        23        083              0.000000       2.309296       0.000000       0.200283   -9999.000000   -9999.000000       0.053800       0.328000
53475     53475     neimenggu      112.4747       40.5231           78       170     2012      03        24        084              0.000000       1.315186       0.000000       0.183582   -9999.000000   -9999.000000   -9999.000000       0.427000
53475     53475     neimenggu      112.4747       40.5231           78       170     2012      03        25        085              0.000000       3.560760       0.214777       0.196237       0.097000       0.053200       0.063700       0.391000
53475     53475     neimenggu      112.4747       40.5231           78       170     2012      03        26        086              0.000000       5.126587       0.342367       0.204549       0.097000   -9999.000000       0.066300   -9999.000000
53475     53475     neimenggu      112.4747       40.5231           78       170     2012      03        27        087              0.000000       6.229218       0.029728       0.212225       0.091000   -9999.000000       0.068500       0.603000
53475     53475     neimenggu      112.4747       40.5231           78       170     2012      03        28        088              0.000000       7.040588       0.943380       0.212351       0.093000       0.177000       0.094700       0.700000
53475     53475     neimenggu      112.4747       40.5231           78       170     2012      03        29        089              0.000000       8.221222       0.846497       0.233408   -9999.000000   -9999.000000       0.058700       0.813000
53475     53475     neimenggu      112.4747       40.5231           78       170     2012      03        30        090              0.000000       5.553253       0.100147       0.204751   -9999.000000       0.087300       0.060500       0.260000
53475     53475     neimenggu      112.4747       40.5231           78       170     2012      03        31        091              0.000000       1.573578       0.296761       0.189860       0.092000   -9999.000000       0.065900   -9999.000000
53475     53475     neimenggu      112.4747       40.5231           78       170     2012      04        01        092              0.000000       5.555206       0.000000       0.214847       0.092000   -9999.000000       0.069100       0.508000
53475     53475     neimenggu      112.4747       40.5231           78       170     2012      04        02        093              0.000000       7.057251       0.082189       0.221374       0.093000   -9999.000000       0.064400       0.251000
53475     53475     neimenggu      112.4747       40.5231           78       170     2012      04        03        094              0.000000       3.351929       0.354516       0.189225   -9999.000000   -9999.000000       0.061800       0.427000
53475     53475     neimenggu      112.4747       40.5231           78       170     2012      04        04        095              0.000000       5.193848       0.000000       0.210587   -9999.000000   -9999.000000       0.065400       0.236000
53475     53475     neimenggu      112.4747       40.5231           78       170     2012      04        05        096              0.000000       6.563660       0.000000       0.212366       0.083000   -9999.000000       0.066700       0.419000
53475     53475     neimenggu      112.4747       40.5231           78       170     2012      04        06        097              0.000000       6.461151       2.176878       0.213929       0.086000   -9999.000000       0.053700       0.184000
53475     53475     neimenggu      112.4747       40.5231           78       170     2012      04        07        098              0.000000       8.946869       0.283688       0.216861       0.081000       0.126700       0.060000       0.301000
53475     53475     neimenggu      112.4747       40.5231           78       170     2012      04        08        099              0.000000       9.973755      15.545384       0.210410       0.081000   -9999.000000   -9999.000000       0.381000
53475     53475     neimenggu      112.4747       40.5231           78       170     2012      04        09        100              0.000000      10.442047       0.000000       0.212365       0.081000   -9999.000000       0.061800       0.297000
53475     53475     neimenggu      112.4747       40.5231           78       170     2012      04        10        101              0.000000      12.753937       0.095716       0.209903       0.083000   -9999.000000       0.061700       0.396000
53475     53475     neimenggu      112.4747       40.5231           78       170     2012      04        11        102              0.000000       9.804688       0.052423       0.201315       0.067000   -9999.000000       0.058100       0.230000
53475     53475     neimenggu      112.4747       40.5231           78       170     2012      04        12        103              0.000000       5.034576       0.000000       0.200044       0.080000       0.036400       0.057000       0.347000
53475     53475     neimenggu      112.4747       40.5231           78       170     2012      04        13        104              0.000000       9.340668       0.397659       0.206908       0.080000   -9999.000000       0.060200       0.337000
53475     53475     neimenggu      112.4747       40.5231           78       170     2012      04        14        105              0.000000      11.577881       0.168623       0.203875   -9999.000000   -9999.000000       0.061100   -9999.000000
53475     53475     neimenggu      112.4747       40.5231           78       170     2012      04        15        106              0.000000      12.767853       0.000000       0.198907   -9999.000000       0.103700       0.055900       0.332000
53475     53475     neimenggu      112.4747       40.5231           78       170     2012      04        16        107              0.000000       9.969604       0.000000       0.190050       0.069000   -9999.000000       0.063300       0.279000
53475     53475     neimenggu      112.4747       40.5231           78       170     2012      04        17        108              0.000000      11.674042       0.000000       0.194168       0.074000       0.169900       0.051500       0.404000
53475     53475     neimenggu      112.4747       40.5231           78       170     2012      04        18        109              0.000000      14.544617       0.199947       0.189929       0.079000   -9999.000000   -9999.000000       0.304000
53475     53475     neimenggu      112.4747       40.5231           78       170     2012      04        19        110              0.000000      12.374451       0.358747       0.193693   -9999.000000   -9999.000000       0.058900   -9999.000000
53475     53475     neimenggu      112.4747       40.5231           78       170     2012      04        20        111              0.000000      11.724823       1.182708       0.191653   -9999.000000       0.025100       0.074700       0.298000
53475     53475     neimenggu      112.4747       40.5231           78       170     2012      04        21        112              0.000000      12.690277       0.000000       0.196913       0.074000   -9999.000000       0.065300       0.275000
53475     53475     neimenggu      112.4747       40.5231           78       170     2012      04        22        113              0.000000      13.609833       0.847942       0.197246       0.077000       0.019300       0.065800       0.284000
53475     53475     neimenggu      112.4747       40.5231           78       170     2012      04        23        114              0.000000      16.853058      14.417480       0.187643       0.073000   -9999.000000       0.064200       0.527000
53475     53475     neimenggu      112.4747       40.5231           78       170     2012      04        24        115              0.000000      14.934814       0.429517       0.245220   -9999.000000   -9999.000000       0.072400   -9999.000000
53475     53475     neimenggu      112.4747       40.5231           78       170     2012      04        25        116              0.000000       9.050720       0.000000       0.261511   -9999.000000       0.193900       0.070700       0.291000
53475     53475     neimenggu      112.4747       40.5231           78       170     2012      04        26        117              0.000000       7.703339       0.597949       0.247166       0.079500   -9999.000000       0.063700       0.173000
53475     53475     neimenggu      112.4747       40.5231           78       170     2012      04        27        118              0.000000      12.014343       0.197656       0.236273       0.071000       0.175100   -9999.000000       0.212000
53475     53475     neimenggu      112.4747       40.5231           78       170     2012      04        28        119              0.000000       9.252258       0.000000       0.230096       0.077000   -9999.000000       0.055600       0.228000
53475     53475     neimenggu      112.4747       40.5231           78       170     2012      04        29        120              0.000000      13.139404       0.000000       0.221657       0.079500       0.097100       0.059400   -9999.000000
53475     53475     neimenggu      112.4747       40.5231           78       170     2012      04        30        121              0.000000      17.018860       1.221695       0.213101       0.084000   -9999.000000       0.069900       0.257000
53475     53475     neimenggu      112.4747       40.5231           78       170     2012      05        01        122              0.000000      14.627136       0.180864       0.217661       0.088500   -9999.000000       0.072000       0.287000
53475     53475     neimenggu      112.4747       40.5231           78       170     2012      05        02        123              0.000000      16.431549       0.000000       0.212285       0.076000   -9999.000000       0.065600       0.190000
53475     53475     neimenggu      112.4747       40.5231           78       170     2012      05        03        124              0.000000      17.284515       0.000000       0.201652       0.078000   -9999.000000       0.066800       0.244000
53475     53475     neimenggu      112.4747       40.5231           78       170     2012      05        04        125              0.000000      18.389618       0.000000       0.191687       0.080000   -9999.000000       0.055700       0.220000
53475     53475     neimenggu      112.4747       40.5231           78       170     2012      05        05        126              0.000000      19.699585       0.000000       0.182432       0.076000   -9999.000000       0.058000       0.111000
53475     53475     neimenggu      112.4747       40.5231           78       170     2012      05        06        127              0.000000      19.631348       0.000000       0.175219       0.078000   -9999.000000       0.057300       0.210000
53475     53475     neimenggu      112.4747       40.5231           78       170     2012      05        07        128              0.000000      21.179749       0.091758       0.169656   -9999.000000   -9999.000000       0.061200       0.289000
53475     53475     neimenggu      112.4747       40.5231           78       170     2012      05        08        129              0.000000      21.313293       0.000000       0.166896       0.071000   -9999.000000       0.063900       0.203000
53475     53475     neimenggu      112.4747       40.5231           78       170     2012      05        09        130              0.000000      21.064148       1.337312       0.162422       0.075000   -9999.000000       0.058300       0.265000
53475     53475     neimenggu      112.4747       40.5231           78       170     2012      05        10        131              0.000000      18.717957       6.363545       0.179881       0.170000       0.062900       0.074900       0.663000
53475     53475     neimenggu      112.4747       40.5231           78       170     2012      05        11        132              0.000000      19.869019       2.774996       0.210604   -9999.000000   -9999.000000       0.111100       0.358000
53475     53475     neimenggu      112.4747       40.5231           78       170     2012      05        12        133              0.000000      14.684723       0.000000       0.249343       0.112000   -9999.000000       0.079800       0.212000
53475     53475     neimenggu      112.4747       40.5231           78       170     2012      05        13        134              0.000000      13.077240       0.000000       0.230895       0.092000       0.215600       0.069900   -9999.000000
53475     53475     neimenggu      112.4747       40.5231           78       170     2012      05        14        135              0.000000      11.638885       0.000000       0.217502       0.085000   -9999.000000       0.086600       0.194000
53475     53475     neimenggu      112.4747       40.5231           78       170     2012      05        15        136              0.000000      11.838165       0.379376       0.209387       0.085000       0.149600       0.069900       0.108000
53475     53475     neimenggu      112.4747       40.5231           78       170     2012      05        16        137              0.000000      13.302765       0.000000       0.202977       0.094000   -9999.000000       0.068100       0.191000
53475     53475     neimenggu      112.4747       40.5231           78       170     2012      05        17        138              0.000000      15.171265       0.000000       0.194930       0.086500       0.091100       0.065700       0.202000
53475     53475     neimenggu      112.4747       40.5231           78       170     2012      05        18        139              0.000000      18.325958       0.037857       0.184109       0.085500       0.040200       0.077200   -9999.000000
53475     53475     neimenggu      112.4747       40.5231           78       170     2012      05        19        140              0.000000      19.802917       1.143029       0.177212       0.079000       0.082700       0.098500       0.233000
53475     53475     neimenggu      112.4747       40.5231           78       170     2012      05        20        141              0.000000      20.340363       0.081935       0.180424       0.092000   -9999.000000       0.078700       0.221000
53475     53475     neimenggu      112.4747       40.5231           78       170     2012      05        21        142              0.000000      22.301849      10.349484       0.180581   -9999.000000       0.191800       0.133000       0.154000
53475     53475     neimenggu      112.4747       40.5231           78       170     2012      05        22        143              0.000000      14.699554       0.088091       0.247555       0.128000   -9999.000000       0.088200       0.337000
53475     53475     neimenggu      112.4747       40.5231           78       170     2012      05        23        144              0.000000      14.949310       0.000000       0.238293   -9999.000000       0.171600       0.079200   -9999.000000
53475     53475     neimenggu      112.4747       40.5231           78       170     2012      05        24        145              0.000000      14.791046       0.000000       0.222127       0.102000       0.072500       0.086400       0.304000
53475     53475     neimenggu      112.4747       40.5231           78       170     2012      05        25        146              0.000000      16.942871       0.078242       0.209790       0.115000   -9999.000000       0.085600       0.161000
53475     53475     neimenggu      112.4747       40.5231           78       170     2012      05        26        147              0.000000      15.140656       0.000000       0.205776       0.117000       0.088500       0.069700       0.219000
53475     53475     neimenggu      112.4747       40.5231           78       170     2012      05        27        148              0.000000      19.800110       0.000000       0.191741       0.112000   -9999.000000       0.072800       0.226000
53475     53475     neimenggu      112.4747       40.5231           78       170     2012      05        28        149              0.000000      21.231262       7.314607       0.179534       0.115500       0.036700       0.071000   -9999.000000
53475     53475     neimenggu      112.4747       40.5231           78       170     2012      05        29        150              0.000000      22.175751       0.368565       0.189755       0.172000   -9999.000000       0.104000       0.497000
53475     53475     neimenggu      112.4747       40.5231           78       170     2012      05        30        151              0.000000      13.700653       0.117356       0.237273       0.108000       0.258700       0.082400   -9999.000000
53475     53475     neimenggu      112.4747       40.5231           78       170     2012      05        31        152              0.000000      16.633484      12.089795       0.215364   -9999.000000       0.042500   -9999.000000   -9999.000000
53475     53475     neimenggu      112.4747       40.5231           78       170     2012      06        01        153              0.000000      13.563995       0.000000       0.280611       0.202000   -9999.000000       0.093200       0.291000
53475     53475     neimenggu      112.4747       40.5231           78       170     2012      06        02        154              0.000000      16.517731       0.529716       0.249620       0.149500       0.079800       0.084200       0.384000
53475     53475     neimenggu      112.4747       40.5231           78       170     2012      06        03        155              0.000000      18.368927       0.429627       0.236372       0.154000       0.090900       0.078600       0.250000
53475     53475     neimenggu      112.4747       40.5231           78       170     2012      06        04        156              0.000000      17.693787       0.030855       0.231204       0.129000   -9999.000000       0.100600       0.230000
53475     53475     neimenggu      112.4747       40.5231           78       170     2012      06        05        157              0.000000      20.257599       0.062186       0.215231       0.134000       0.011800       0.100200       0.311000
53475     53475     neimenggu      112.4747       40.5231           78       170     2012      06        06        158              0.000000      21.276611      11.371396       0.205912   -9999.000000   -9999.000000       0.151200       1.000000
53475     53475     neimenggu      112.4747       40.5231           78       170     2012      06        07        159              0.000000      16.180328       0.485838       0.271815       0.185500   -9999.000000       0.127300       0.810000
53475     53475     neimenggu      112.4747       40.5231           78       170     2012      06        08        160              0.000000      17.752014       6.407977       0.250840       0.168500       0.147500       0.082400       0.794000
53475     53475     neimenggu      112.4747       40.5231           78       170     2012      06        09        161              0.000000      19.255798       0.140211       0.258793       0.150000   -9999.000000   -9999.000000       0.354000
53475     53475     neimenggu      112.4747       40.5231           78       170     2012      06        10        162              0.000000      17.842010       0.000000       0.247972       0.144000       0.119700       0.103000       0.305000
53475     53475     neimenggu      112.4747       40.5231           78       170     2012      06        11        163              0.000000      16.661224       0.000000       0.232039       0.155000   -9999.000000       0.104800   -9999.000000
53475     53475     neimenggu      112.4747       40.5231           78       170     2012      06        12        164              0.000000      18.223236       0.000000       0.220181       0.158000   -9999.000000       0.091300       0.339000
53475     53475     neimenggu      112.4747       40.5231           78       170     2012      06        13        165              0.000000      18.960144       1.531921       0.211842       0.163000       0.083300       0.097400       0.273000
53475     53475     neimenggu      112.4747       40.5231           78       170     2012      06        14        166              0.000000      15.738220       0.210019       0.210312       0.142000   -9999.000000       0.103400       0.347000
53475     53475     neimenggu      112.4747       40.5231           78       170     2012      06        15        167              0.000000      14.901947       0.000000       0.210893       0.135000       0.059100       0.100200       0.321000
53475     53475     neimenggu      112.4747       40.5231           78       170     2012      06        16        168              0.000000      17.704498       0.000000       0.203294       0.157000   -9999.000000       0.098900   -9999.000000
53475     53475     neimenggu      112.4747       40.5231           78       170     2012      06        17        169              0.000000      21.239990       0.000000       0.190902       0.144000       0.186700       0.100500       0.373000
53475     53475     neimenggu      112.4747       40.5231           78       170     2012      06        18        170              0.000000      23.363373       0.046154       0.179348       0.137500       0.069800       0.088600       0.359000
53475     53475     neimenggu      112.4747       40.5231           78       170     2012      06        19        171              0.000000      24.325623       2.079925       0.171085       0.161000   -9999.000000       0.078500       0.330000
53475     53475     neimenggu      112.4747       40.5231           78       170     2012      06        20        172              0.000000      23.133972       2.327289       0.185074       0.142000       0.129200       0.086300       0.566000
53475     53475     neimenggu      112.4747       40.5231           78       170     2012      06        21        173              0.000000      21.913269       0.809255       0.205448       0.243000   -9999.000000       0.105700   -9999.000000
53475     53475     neimenggu      112.4747       40.5231           78       170     2012      06        22        174              0.000000      22.495239       0.364066       0.202354       0.235000   -9999.000000       0.114900       0.405000
53475     53475     neimenggu      112.4747       40.5231           78       170     2012      06        23        175              0.000000      22.727051      20.805214       0.193340       0.234000       0.109600       0.161300       0.995000
53475     53475     neimenggu      112.4747       40.5231           78       170     2012      06        24        176              0.000000      23.402313       0.312019       0.275501       0.220000   -9999.000000       0.127900       0.959000
53475     53475     neimenggu      112.4747       40.5231           78       170     2012      06        25        177              0.000000      21.074188       6.170140       0.267282       0.182000   -9999.000000       0.123300       0.870000
53475     53475     neimenggu      112.4747       40.5231           78       170     2012      06        26        178              0.000000      21.502411      11.964119       0.267721       0.319500       0.284800   -9999.000000   -9999.000000
53475     53475     neimenggu      112.4747       40.5231           78       170     2012      06        27        179              0.000000      19.841003       9.356339       0.297853       0.335000   -9999.000000       0.189400       0.873000
53475     53475     neimenggu      112.4747       40.5231           78       170     2012      06        28        180              0.000000      19.627014       8.073858       0.294691       0.322000       0.297700       0.184800       1.000000
53475     53475     neimenggu      112.4747       40.5231           78       170     2012      06        29        181              0.000000      17.109283       0.000000       0.308259       0.265000       0.408700       0.176400       1.000000
53475     53475     neimenggu      112.4747       40.5231           78       170     2012      06        30        182              0.000000      20.397308       0.000000       0.279384       0.187000   -9999.000000       0.130800   -9999.000000
53475     53475     neimenggu      112.4747       40.5231           78       170     2012      07        01        183              0.000000      22.244598       0.000000       0.262668       0.187500       0.167900       0.113400       0.623000
53475     53475     neimenggu      112.4747       40.5231           78       170     2012      07        02        184              0.000000      22.636414       0.000000       0.249731       0.180000   -9999.000000       0.102500       0.394000
53475     53475     neimenggu      112.4747       40.5231           78       170     2012      07        03        185              0.000000      22.965912       0.834746       0.239518       0.211000       0.120900       0.108300       0.457000
53475     53475     neimenggu      112.4747       40.5231           78       170     2012      07        04        186              0.000000      23.553253       4.132724       0.231607       0.173000   -9999.000000       0.113600       0.541000
53475     53475     neimenggu      112.4747       40.5231           78       170     2012      07        05        187              0.000000      22.561401       1.361047       0.249387       0.160000       0.103200       0.089300       0.557000
53475     53475     neimenggu      112.4747       40.5231           78       170     2012      07        06        188              0.000000      24.010162       0.278457       0.241647   -9999.000000       0.110300       0.096000       0.463000
53475     53475     neimenggu      112.4747       40.5231           78       170     2012      07        07        189              0.000000      25.075714       0.726248       0.228158   -9999.000000   -9999.000000       0.099000       0.400000
53475     53475     neimenggu      112.4747       40.5231           78       170     2012      07        08        190              0.000000      22.661804       0.454239       0.228669       0.235000       0.141100       0.112000       0.417000
53475     53475     neimenggu      112.4747       40.5231           78       170     2012      07        09        191              0.000000      22.310455       0.476761       0.225042       0.179000       0.079600       0.134000       0.531000
53475     53475     neimenggu      112.4747       40.5231           78       170     2012      07        10        192              0.000000      23.472778       2.347942       0.220419       0.157000       0.355600       0.158500   -9999.000000
53475     53475     neimenggu      112.4747       40.5231           78       170     2012      07        11        193              0.000000      22.773499       0.197040       0.227793       0.180000       0.138900       0.117100       0.404000
53475     53475     neimenggu      112.4747       40.5231           78       170     2012      07        12        194              0.086000      23.075623       0.413190       0.216611       0.214000   -9999.000000       0.133300       0.534000
53475     53475     neimenggu      112.4747       40.5231           78       170     2012      07        13        195              0.000000      22.033661       2.493300       0.213562       0.255000   -9999.000000   -9999.000000       0.493000
53475     53475     neimenggu      112.4747       40.5231           78       170     2012      07        14        196              0.000000      21.613403       2.428153       0.221661       0.281000       0.240100       0.176700       0.666000
53475     53475     neimenggu      112.4747       40.5231           78       170     2012      07        15        197              0.000000      20.018463       0.000000       0.242989       0.199500   -9999.000000       0.144600   -9999.000000
53475     53475     neimenggu      112.4747       40.5231           78       170     2012      07        16        198              0.000000      22.913818       0.000000       0.221702       0.180000       0.190200       0.102300       0.523000
53475     53475     neimenggu      112.4747       40.5231           78       170     2012      07        17        199              0.000000      24.042542       0.000000       0.205908       0.198000   -9999.000000       0.101400       0.430000
53475     53475     neimenggu      112.4747       40.5231           78       170     2012      07        18        200              0.000000      23.938843       0.000000       0.194132       0.188000   -9999.000000       0.100700       0.384000
53475     53475     neimenggu      112.4747       40.5231           78       170     2012      07        19        201              0.000000      23.520081       0.192116       0.187677       0.198000       0.051500       0.113500       0.459000
53475     53475     neimenggu      112.4747       40.5231           78       170     2012      07        20        202              0.072750      24.851532      15.306965       0.180242       0.182000   -9999.000000       0.109000   -9999.000000
53475     53475     neimenggu      112.4747       40.5231           78       170     2012      07        21        203              0.229417      25.197784      32.925213       0.203810       0.350000       0.344500       0.176200       1.000000
53475     53475     neimenggu      112.4747       40.5231           78       170     2012      07        22        204              0.227125      18.031097       0.000000       0.326099       0.310000   -9999.000000       0.173000       0.923000
53475     53475     neimenggu      112.4747       40.5231           78       170     2012      07        23        205              0.212500      20.485352       0.112219       0.283963       0.284000   -9999.000000       0.144900       0.910000
53475     53475     neimenggu      112.4747       40.5231           78       170     2012      07        24        206              0.212167      21.765137      15.487028       0.270299       0.324000       0.302200       0.128400       0.729000
53475     53475     neimenggu      112.4747       40.5231           78       170     2012      07        25        207              0.253667      23.254730      69.322060       0.284118       0.374000   -9999.000000       0.137300   -9999.000000
53475     53475     neimenggu      112.4747       40.5231           78       170     2012      07        26        208              0.254667      20.683075       2.793619       0.344061       0.325000       0.415200       0.177600       1.000000
53475     53475     neimenggu      112.4747       40.5231           78       170     2012      07        27        209              0.243958      22.974152      11.045063       0.321758       0.289000   -9999.000000       0.167400       0.974000
53475     53475     neimenggu      112.4747       40.5231           78       170     2012      07        28        210              0.243292      22.922516       3.739919       0.311088       0.342000   -9999.000000       0.175400       1.000000
53475     53475     neimenggu      112.4747       40.5231           78       170     2012      07        29        211              0.230000      21.768341       0.000000       0.308274       0.311000       0.229300       0.171500       0.970000
53475     53475     neimenggu      112.4747       40.5231           78       170     2012      07        30        212              0.241167      22.318756      40.177361       0.289976   -9999.000000   -9999.000000       0.195600       1.000000
53475     53475     neimenggu      112.4747       40.5231           78       170     2012      07        31        213              0.251750      18.146820       0.134030       0.334779       0.311000       0.399000       0.190900       1.000000
53475     53475     neimenggu      112.4747       40.5231           78       170     2012      08        01        214              0.248542      20.636444      16.866014       0.311877       0.315000       0.225400       0.207100       1.000000
53475     53475     neimenggu      112.4747       40.5231           78       170     2012      08        02        215              0.246333      21.291748       1.347566       0.318371       0.297000   -9999.000000       0.200500       1.000000
53475     53475     neimenggu      112.4747       40.5231           78       170     2012      08        03        216              0.234833      22.495514       2.829906       0.302376       0.342000   -9999.000000       0.180900       1.000000
53475     53475     neimenggu      112.4747       40.5231           78       170     2012      08        04        217              0.227667      22.726685       0.677587       0.294392       0.301000   -9999.000000       0.185100       1.000000
53475     53475     neimenggu      112.4747       40.5231           78       170     2012      08        05        218              0.220375      24.050140       1.393775       0.281781       0.264500   -9999.000000       0.169400       0.948000
53475     53475     neimenggu      112.4747       40.5231           78       170     2012      08        06        219              0.214917      24.058960       2.754742       0.275097       0.260000   -9999.000000       0.164500       0.828000
53475     53475     neimenggu      112.4747       40.5231           78       170     2012      08        07        220              0.212125      22.589386       2.025855       0.283442       0.295000   -9999.000000   -9999.000000       0.970000
53475     53475     neimenggu      112.4747       40.5231           78       170     2012      08        08        221              0.210458      21.823944       0.238090       0.283074       0.275500       0.346400       0.147200   -9999.000000
53475     53475     neimenggu      112.4747       40.5231           78       170     2012      08        09        222              0.205458      21.650879       0.101861       0.271169       0.253000   -9999.000000       0.140300       0.893000
53475     53475     neimenggu      112.4747       40.5231           78       170     2012      08        10        223              0.200833      22.425873       3.116718       0.260598       0.226500   -9999.000000   -9999.000000       0.737000
53475     53475     neimenggu      112.4747       40.5231           78       170     2012      08        11        224              0.222750      22.111664      10.116988       0.260850       0.307000       0.257900       0.164800       1.000000
53475     53475     neimenggu      112.4747       40.5231           78       170     2012      08        12        225              0.228667      16.508148       0.000000       0.302092       0.273000   -9999.000000       0.161700       0.887000
53475     53475     neimenggu      112.4747       40.5231           78       170     2012      08        13        226              0.220913      19.979584       6.690666       0.277871       0.236000       0.396200       0.145800   -9999.000000
53475     53475     neimenggu      112.4747       40.5231           78       170     2012      08        14        227              0.243750      20.801880      10.041181       0.276792       0.324000   -9999.000000       0.182900       1.000000
53475     53475     neimenggu      112.4747       40.5231           78       170     2012      08        15        228              0.235250      18.139862       0.000000       0.308837       0.273000   -9999.000000       0.163000       0.912000
53475     53475     neimenggu      112.4747       40.5231           78       170     2012      08        16        229              0.226833      19.333740       0.055501       0.283897       0.250000       0.299400       0.160100       0.942000
53475     53475     neimenggu      112.4747       40.5231           78       170     2012      08        17        230              0.221286      20.788910       0.302218       0.275195       0.256000       0.416300       0.156300       0.862000
53475     53475     neimenggu      112.4747       40.5231           78       170     2012      08        18        231              0.215542      20.127167       0.113494       0.272878       0.262000       0.335700       0.160100   -9999.000000
53475     53475     neimenggu      112.4747       40.5231           78       170     2012      08        19        232              0.211083      19.232727       0.094609       0.269333       0.256000       0.135400       0.136300       0.928000
53475     53475     neimenggu      112.4747       40.5231           78       170     2012      08        20        233              0.204500      21.043274       0.375440       0.260454       0.236000       0.112400       0.143700       0.710000
53475     53475     neimenggu      112.4747       40.5231           78       170     2012      08        21        234              0.198458      17.556396       0.000000       0.255563       0.196000       0.286300       0.139100       0.710000
53475     53475     neimenggu      112.4747       40.5231           78       170     2012      08        22        235              0.194542      15.081177       0.000000       0.251133       0.208500       0.182200       0.147000   -9999.000000
53475     53475     neimenggu      112.4747       40.5231           78       170     2012      08        23        236              0.192625      16.642059       0.000000       0.247622       0.213000   -9999.000000       0.143700   -9999.000000
53475     53475     neimenggu      112.4747       40.5231           78       170     2012      08        24        237              0.190375      18.695587       0.000000       0.244324       0.221000       0.176100       0.155200       0.656000
53475     53475     neimenggu      112.4747       40.5231           78       170     2012      08        25        238              0.000000      19.737701       0.348682       0.240807       0.233000       0.150700       0.141000       0.697000
53475     53475     neimenggu      112.4747       40.5231           78       170     2012      08        26        239              0.187500      19.875000       0.423585       0.241406       0.249000       0.110100       0.141100       0.692000
53475     53475     neimenggu      112.4747       40.5231           78       170     2012      08        27        240              0.199958      21.028442      11.028266       0.240415       0.273000       0.145700   -9999.000000       0.893000
53475     53475     neimenggu      112.4747       40.5231           78       170     2012      08        28        241              0.213458      19.163422       0.000000       0.295768       0.211000       0.147500       0.147700       0.789000
53475     53475     neimenggu      112.4747       40.5231           78       170     2012      08        29        242              0.206083      19.982605       0.347966       0.267643       0.201000       0.236100       0.154000       0.640000
53475     53475     neimenggu      112.4747       40.5231           78       170     2012      08        30        243              0.199625      20.679657       0.027876       0.257621       0.229000   -9999.000000       0.134800       0.681000
53475     53475     neimenggu      112.4747       40.5231           78       170     2012      08        31        244              0.194542      20.789398       0.054482       0.250611       0.223000       0.142400       0.137200       0.660000
53475     53475     neimenggu      112.4747       40.5231           78       170     2012      09        01        245              0.232125      18.487366      26.895979       0.251924       0.302000   -9999.000000       0.168800       1.000000
53475     53475     neimenggu      112.4747       40.5231           78       170     2012      09        02        246              0.236417      13.983368       1.344037       0.322496       0.314000       0.184000       0.170300       1.000000
53475     53475     neimenggu      112.4747       40.5231           78       170     2012      09        03        247              0.226208      14.917664       0.000000       0.292434       0.266000       0.185800       0.157600       0.771000
53475     53475     neimenggu      112.4747       40.5231           78       170     2012      09        04        248              0.218083      12.613312       0.000000       0.280577       0.240000       0.440000       0.151300       0.686000
53475     53475     neimenggu      112.4747       40.5231           78       170     2012      09        05        249              0.212625      13.918976       0.000000       0.272941   -9999.000000       0.151600       0.135500       0.638000
53475     53475     neimenggu      112.4747       40.5231           78       170     2012      09        06        250              0.207875      15.570587       0.589970       0.267316       0.226000   -9999.000000       0.149200   -9999.000000
53475     53475     neimenggu      112.4747       40.5231           78       170     2012      09        07        251              0.204083      16.649292       0.000000       0.266179       0.206000   -9999.000000       0.138600       0.670000
53475     53475     neimenggu      112.4747       40.5231           78       170     2012      09        08        252              0.201375      16.633972       0.000000       0.261322       0.197000       0.213400       0.133600       0.591000
53475     53475     neimenggu      112.4747       40.5231           78       170     2012      09        09        253              0.199375      17.003510       0.000000       0.257082       0.193000   -9999.000000       0.135400       0.642000
53475     53475     neimenggu      112.4747       40.5231           78       170     2012      09        10        254              0.195542      18.016724       3.454517       0.253031       0.238000   -9999.000000       0.138100       0.804000
53475     53475     neimenggu      112.4747       40.5231           78       170     2012      09        11        255              0.192750      14.761261       1.029839       0.270010       0.210000   -9999.000000       0.125100   -9999.000000
53475     53475     neimenggu      112.4747       40.5231           78       170     2012      09        12        256              0.189125      12.265350       0.000000       0.269814       0.166500   -9999.000000       0.118300       0.731000
53475     53475     neimenggu      112.4747       40.5231           78       170     2012      09        13        257              0.185958      10.910339       2.694474       0.262714       0.201000       0.262200   -9999.000000       0.824000
53475     53475     neimenggu      112.4747       40.5231           78       170     2012      09        14        258              0.184458      10.268341       0.843667       0.271509       0.167000   -9999.000000       0.120700       0.820000
53475     53475     neimenggu      112.4747       40.5231           78       170     2012      09        15        259              0.184958      11.778107       0.149813       0.265433   -9999.000000       0.303400       0.125800       0.580000
53475     53475     neimenggu      112.4747       40.5231           78       170     2012      09        16        260              0.184000      13.317596       0.797221       0.259691       0.176000       0.199500       0.118600   -9999.000000
53475     53475     neimenggu      112.4747       40.5231           78       170     2012      09        17        261              0.184375      12.836151       2.362523       0.263545       0.174000   -9999.000000       0.101300       0.583000
53475     53475     neimenggu      112.4747       40.5231           78       170     2012      09        18        262              0.185083      13.881683       0.218116       0.269004       0.163500       0.142900       0.099200       0.588000
53475     53475     neimenggu      112.4747       40.5231           78       170     2012      09        19        263              0.185250      14.458649       0.552198       0.263433       0.156000   -9999.000000       0.097400       0.626000
53475     53475     neimenggu      112.4747       40.5231           78       170     2012      09        20        264              0.184917      14.756592       1.505290       0.261870       0.183500       0.302300       0.110000       0.524000
53475     53475     neimenggu      112.4747       40.5231           78       170     2012      09        21        265              0.183833      15.469604       0.065268       0.260563   -9999.000000       0.132100       0.100700   -9999.000000
53475     53475     neimenggu      112.4747       40.5231           78       170     2012      09        22        266              0.183750      13.286713       0.000000       0.264625       0.175000   -9999.000000       0.094200       0.658000
53475     53475     neimenggu      112.4747       40.5231           78       170     2012      09        23        267              0.181875      15.554047       3.238927       0.258033       0.176000       0.095000       0.105500       0.632000
53475     53475     neimenggu      112.4747       40.5231           78       170     2012      09        24        268              0.192833      14.149353      24.468437       0.269832   -9999.000000       0.041100       0.114400       0.624000
53475     53475     neimenggu      112.4747       40.5231           78       170     2012      09        25        269              0.234333      12.950500       0.490306       0.309703       0.245000   -9999.000000       0.130300       0.885000
53475     53475     neimenggu      112.4747       40.5231           78       170     2012      09        26        270              0.227000      11.112518       7.894065       0.304851   -9999.000000       0.245100       0.145900       0.985000
53475     53475     neimenggu      112.4747       40.5231           78       170     2012      09        27        271              0.226429      12.870117       0.353475       0.301965   -9999.000000       0.284300       0.147200       0.867000
53475     53475     neimenggu      112.4747       40.5231           78       170     2012      09        28        272              0.216000       8.449005       0.044454       0.293155       0.205000   -9999.000000       0.136300       0.749000
53475     53475     neimenggu      112.4747       40.5231           78       170     2012      09        29        273              0.211750       8.601624       0.043792       0.282892       0.195000   -9999.000000       0.137300       0.644000
53475     53475     neimenggu      112.4747       40.5231           78       170     2012      09        30        274              0.207500       9.524780       0.057837       0.277337       0.172000   -9999.000000       0.118500       0.603000
53475     53475     neimenggu      112.4747       40.5231           78       170     2012      10        01        275              0.203750      10.186249       0.032726       0.273116       0.135000   -9999.000000       0.103800       0.696000
53475     53475     neimenggu      112.4747       40.5231           78       170     2012      10        02        276              0.200333      11.187927       0.000000       0.269363   -9999.000000   -9999.000000       0.111500       0.619000
53475     53475     neimenggu      112.4747       40.5231           78       170     2012      10        03        277              0.197208      11.397705       0.000000       0.265702       0.130000       0.068900       0.097300       0.516000
53475     53475     neimenggu      112.4747       40.5231           78       170     2012      10        04        278              0.197042      10.356567       6.251246       0.263409       0.154000       0.162600       0.116600       0.870000
53475     53475     neimenggu      112.4747       40.5231           78       170     2012      10        05        279              0.203250       8.061035       0.885925       0.288026   -9999.000000       0.173900       0.146600   -9999.000000
53475     53475     neimenggu      112.4747       40.5231           78       170     2012      10        06        280              0.202208       9.321991       0.083498       0.280436       0.164000       0.313500       0.113100       0.778000
53475     53475     neimenggu      112.4747       40.5231           78       170     2012      10        07        281              0.200292      10.180084       0.673806       0.273033   -9999.000000   -9999.000000       0.104700       0.641000
53475     53475     neimenggu      112.4747       40.5231           78       170     2012      10        08        282              0.199500      10.104858       4.410602       0.272759   -9999.000000       0.202600       0.118300       0.626000
53475     53475     neimenggu      112.4747       40.5231           78       170     2012      10        09        283              0.197917      10.127869       0.000000       0.282051       0.170000       0.266500       0.122400       0.691000
53475     53475     neimenggu      112.4747       40.5231           78       170     2012      10        10        284              0.193917       6.573151       0.339085       0.274720       0.157000       0.299100       0.125000   -9999.000000
53475     53475     neimenggu      112.4747       40.5231           78       170     2012      10        11        285              0.193375       7.117371       0.304208       0.271762       0.133000       0.106000       0.111800       0.672000
53475     53475     neimenggu      112.4747       40.5231           78       170     2012      10        12        286              0.191458       9.391571       0.000000       0.268699       0.126000       0.156100       0.101900       0.587000
53475     53475     neimenggu      112.4747       40.5231           78       170     2012      10        13        287              0.187917       8.985992       1.012074       0.263843   -9999.000000       0.183900       0.102600       0.533000
53475     53475     neimenggu      112.4747       40.5231           78       170     2012      10        14        288              0.186708       6.583649       1.221219       0.259905       0.116000       0.227000       0.098400       0.555000
53475     53475     neimenggu      112.4747       40.5231           78       170     2012      10        15        289              0.192625       7.918396       5.737126       0.265876       0.121000       0.149700       0.099100   -9999.000000
53475     53475     neimenggu      112.4747       40.5231           78       170     2012      10        16        290              0.212875       8.311737       0.148372       0.280045   -9999.000000   -9999.000000       0.132400       0.904000
53475     53475     neimenggu      112.4747       40.5231           78       170     2012      10        17        291              0.207750       3.780457       0.664463       0.259326       0.193000       0.283400       0.089900       0.580000
53475     53475     neimenggu      112.4747       40.5231           78       170     2012      10        18        292              0.203292       3.994995       0.295167       0.253416   -9999.000000   -9999.000000       0.090400       0.670000
53475     53475     neimenggu      112.4747       40.5231           78       170     2012      10        19        293              0.201000       4.740692       0.256456       0.260362   -9999.000000       0.154800       0.096700       0.676000
53475     53475     neimenggu      112.4747       40.5231           78       170     2012      10        20        294              0.200667       6.529907       2.277654       0.265650       0.133000   -9999.000000       0.097300   -9999.000000
53475     53475     neimenggu      112.4747       40.5231           78       170     2012      10        21        295              0.222458       8.178802       3.461725       0.269781   -9999.000000   -9999.000000       0.102700       1.000000
53475     53475     neimenggu      112.4747       40.5231           78       170     2012      10        22        296              0.220625       3.461945       0.000000       0.277614   -9999.000000   -9999.000000       0.123900       0.755000
53475     53475     neimenggu      112.4747       40.5231           78       170     2012      10        23        297              0.215333       4.294586       0.000000       0.268871   -9999.000000   -9999.000000       0.089700       0.838000
53475     53475     neimenggu      112.4747       40.5231           78       170     2012      10        24        298              0.211208       6.084473       0.000000       0.270373   -9999.000000   -9999.000000       0.084700       0.724000
53475     53475     neimenggu      112.4747       40.5231           78       170     2012      10        25        299              0.000000       6.402069       0.275032       0.265679       0.137000   -9999.000000       0.091300       0.798000
53475     53475     neimenggu      112.4747       40.5231           78       170     2012      10        26        300              0.207000       6.902893       0.041727       0.265216   -9999.000000   -9999.000000       0.090900       0.671000
53475     53475     neimenggu      112.4747       40.5231           78       170     2012      10        27        301              0.205583       5.360199       0.000000       0.267134       0.133000       0.268900       0.096100       0.587000
53475     53475     neimenggu      112.4747       40.5231           78       170     2012      10        28        302              0.000000       5.479065       0.225906       0.254790       0.138000   -9999.000000   -9999.000000       0.589000
53475     53475     neimenggu      112.4747       40.5231           78       170     2012      10        29        303              0.199875       5.804840       0.735141       0.259681   -9999.000000       0.139500       0.067100       0.439000
53475     53475     neimenggu      112.4747       40.5231           78       170     2012      10        30        304              0.195958       3.049652       0.332485       0.223623       0.121000   -9999.000000       0.068400       0.531000
53475     53475     neimenggu      112.4747       40.5231           78       170     2012      10        31        305              0.193250       1.804138       0.270966       0.213770       0.115000       0.238800       0.070000       0.385000
53475     53475     neimenggu      112.4747       40.5231           78       170     2012      11        01        306              0.191833       2.348846       0.220576       0.224052       0.116000       0.089600       0.072600       0.434000
53475     53475     neimenggu      112.4747       40.5231           78       170     2012      11        02        307              0.191583       3.136871       0.586657       0.238511       0.114000       0.329200       0.076900       0.478000
53475     53475     neimenggu      112.4747       40.5231           78       170     2012      11        03        308              0.198500       5.923065       0.104841       0.257890   -9999.000000   -9999.000000       0.056100   -9999.000000
53475     53475     neimenggu      112.4747       40.5231           78       170     2012      11        04        309              0.195125      -1.038940       0.000000       0.179133   -9999.000000   -9999.000000       0.056400       0.427000
53475     53475     neimenggu      112.4747       40.5231           78       170     2012      11        05        310              0.191000      -3.314484       0.434952       0.118765   -9999.000000   -9999.000000       0.043200       0.431000
53475     53475     neimenggu      112.4747       40.5231           78       170     2012      11        06        311              0.190000      -2.177856       0.142563       0.137512       0.118000       0.070300       0.050400       0.430000
53475     53475     neimenggu      112.4747       40.5231           78       170     2012      11        07        312              0.191250      -0.358826       0.111952       0.164281   -9999.000000   -9999.000000       0.052100       0.394000
53475     53475     neimenggu      112.4747       40.5231           78       170     2012      11        08        313              0.190000      -0.560150       0.062793       0.166220   -9999.000000   -9999.000000   -9999.000000   -9999.000000
53475     53475     neimenggu      112.4747       40.5231           78       170     2012      11        09        314              0.188750       0.329987       0.000000       0.177820   -9999.000000   -9999.000000       0.049000       0.535000
53475     53475     neimenggu      112.4747       40.5231           78       170     2012      11        10        315              0.191750       0.439392       0.000000       0.186439   -9999.000000       0.210400       0.043900       0.376000
53475     53475     neimenggu      112.4747       40.5231           78       170     2012      11        11        316              0.185708      -3.486877       0.000000       0.131932   -9999.000000       0.124900   -9999.000000       0.341000
53475     53475     neimenggu      112.4747       40.5231           78       170     2012      11        12        317              0.171708      -5.568787       0.000000       0.108383   -9999.000000   -9999.000000       0.034400       0.415000
53475     53475     neimenggu      112.4747       40.5231           78       170     2012      11        13        318              0.000000      -4.651306       0.000000       0.113891   -9999.000000       0.125100       0.035600   -9999.000000
53475     53475     neimenggu      112.4747       40.5231           78       170     2012      11        14        319              0.094250      -6.301971       0.000000       0.107599   -9999.000000       0.043200   -9999.000000       0.394000
53475     53475     neimenggu      112.4747       40.5231           78       170     2012      11        15        320              0.084083      -4.411804       0.000000       0.114315   -9999.000000   -9999.000000       0.032700       0.334000
53475     53475     neimenggu      112.4747       40.5231           78       170     2012      11        16        321              0.082708      -2.854950       0.000000       0.121862   -9999.000000   -9999.000000       0.035300       0.206000
53475     53475     neimenggu      112.4747       40.5231           78       170     2012      11        17        322              0.000000      -4.529724       0.000000       0.115488   -9999.000000   -9999.000000       0.035600       0.304000
53475     53475     neimenggu      112.4747       40.5231           78       170     2012      11        18        323              0.068208      -4.300903       0.000000       0.112071   -9999.000000   -9999.000000       0.036000   -9999.000000
53475     53475     neimenggu      112.4747       40.5231           78       170     2012      11        19        324              0.059208      -3.567047       0.000000       0.128028   -9999.000000       0.073500       0.032500       0.397000
53475     53475     neimenggu      112.4747       40.5231           78       170     2012      11        20        325              0.056458      -4.536560       0.000000       0.115362   -9999.000000   -9999.000000       0.031000       0.268000
53475     53475     neimenggu      112.4747       40.5231           78       170     2012      11        21        326              0.059542      -3.771820       0.000000       0.118903   -9999.000000   -9999.000000       0.030200       0.365000
53475     53475     neimenggu      112.4747       40.5231           78       170     2012      11        22        327              0.059125      -1.972961       0.000000       0.131959   -9999.000000   -9999.000000       0.027200       0.340000
53475     53475     neimenggu      112.4747       40.5231           78       170     2012      11        23        328              0.043042      -5.864166       0.000000       0.113717   -9999.000000       0.203500       0.027700       0.358000
53475     53475     neimenggu      112.4747       40.5231           78       170     2012      11        24        329              0.039833      -7.428925       0.000000       0.099947   -9999.000000   -9999.000000       0.029600       0.321000
53475     53475     neimenggu      112.4747       40.5231           78       170     2012      11        25        330              0.039625      -4.561066       0.000000       0.108081   -9999.000000       0.079300       0.027900       0.208000
53475     53475     neimenggu      112.4747       40.5231           78       170     2012      11        26        331              0.035667      -5.488281       0.000000       0.106937   -9999.000000   -9999.000000   -9999.000000       0.233000
53475     53475     neimenggu      112.4747       40.5231           78       170     2012      11        27        332              0.035375      -5.397247       0.000000       0.103221   -9999.000000   -9999.000000       0.028400       0.299000
53475     53475     neimenggu      112.4747       40.5231           78       170     2012      11        28        333              0.030625      -5.159149       0.000000       0.110415   -9999.000000       0.158700       0.026000       0.339000
53475     53475     neimenggu      112.4747       40.5231           78       170     2012      11        29        334              0.024792      -8.431335       0.000000       0.100209   -9999.000000       0.062200       0.026300       0.235000
53475     53475     neimenggu      112.4747       40.5231           78       170     2012      11        30        335              0.021500      -8.909851       0.000000       0.098022   -9999.000000   -9999.000000       0.024900       0.136000
53475     53475     neimenggu      112.4747       40.5231           78       170     2012      12        01        336              0.025292      -8.036072       0.000000       0.098370   -9999.000000   -9999.000000       0.022500       0.212000
53475     53475     neimenggu      112.4747       40.5231           78       170     2012      12        02        337              0.028083      -6.136932       0.000000       0.099992   -9999.000000       0.040500       0.024100   -9999.000000
53475     53475     neimenggu      112.4747       40.5231           78       170     2012      12        03        338              0.025917      -6.276764       0.000000       0.100588   -9999.000000       0.155700       0.024400       0.231000
53475     53475     neimenggu      112.4747       40.5231           78       170     2012      12        04        339              0.022917     -10.099945       0.000000       0.098148   -9999.000000       0.022100       0.023100       0.176000
53475     53475     neimenggu      112.4747       40.5231           78       170     2012      12        05        340              0.019625      -9.591675       0.000000       0.097640   -9999.000000   -9999.000000       0.023800       0.089000
53475     53475     neimenggu      112.4747       40.5231           78       170     2012      12        06        341              0.019625     -11.923340       0.000000       0.097040   -9999.000000   -9999.000000       0.020200       0.190000
53475     53475     neimenggu      112.4747       40.5231           78       170     2012      12        07        342              0.018833      -9.814728       0.000000       0.097652   -9999.000000   -9999.000000       0.024300   -9999.000000
53475     53475     neimenggu      112.4747       40.5231           78       170     2012      12        08        343              0.013875     -12.832001       0.000000       0.096209   -9999.000000   -9999.000000       0.025300       0.234000
53475     53475     neimenggu      112.4747       40.5231           78       170     2012      12        09        344              0.012042     -14.526642       0.000000       0.093984   -9999.000000   -9999.000000       0.019000       0.194000
53475     53475     neimenggu      112.4747       40.5231           78       170     2012      12        10        345              0.012083     -11.979279       0.000000       0.093977   -9999.000000   -9999.000000       0.019300       0.157000
53475     53475     neimenggu      112.4747       40.5231           78       170     2012      12        11        346              0.012125     -10.629150       0.000000       0.094516   -9999.000000   -9999.000000       0.017500       0.166000
53475     53475     neimenggu      112.4747       40.5231           78       170     2012      12        12        347              0.012167     -10.165344       0.000000       0.094862   -9999.000000   -9999.000000   -9999.000000   -9999.000000
53475     53475     neimenggu      112.4747       40.5231           78       170     2012      12        13        348              0.013792      -9.294464       0.000000       0.095127   -9999.000000   -9999.000000       0.022500       0.285000
53475     53475     neimenggu      112.4747       40.5231           78       170     2012      12        14        349              0.019083      -7.081421       0.000000       0.096049   -9999.000000   -9999.000000       0.014400       0.146000
53475     53475     neimenggu      112.4747       40.5231           78       170     2012      12        15        350              0.000000      -5.698334       0.000000       0.097480   -9999.000000   -9999.000000       0.018200       0.132000
53475     53475     neimenggu      112.4747       40.5231           78       170     2012      12        16        351              0.024792      -4.658447       0.000000       0.107158   -9999.000000   -9999.000000       0.019200       0.236000
53475     53475     neimenggu      112.4747       40.5231           78       170     2012      12        17        352              0.017417      -5.719238       0.000000       0.105900   -9999.000000       0.071200       0.010000   -9999.000000
53475     53475     neimenggu      112.4747       40.5231           78       170     2012      12        18        353              0.013125     -10.209259       0.000000       0.096859   -9999.000000       0.109900       0.012200       0.185000
53475     53475     neimenggu      112.4747       40.5231           78       170     2012      12        19        354              0.013375     -10.042999       0.000000       0.095586   -9999.000000   -9999.000000       0.018200       0.176000
53475     53475     neimenggu      112.4747       40.5231           78       170     2012      12        20        355              0.000000      -8.643677       0.000000       0.096039   -9999.000000   -9999.000000       0.010000       0.214000
53475     53475     neimenggu      112.4747       40.5231           78       170     2012      12        21        356              0.016042      -9.178253       0.000000       0.096355   -9999.000000   -9999.000000       0.013600       0.155000
53475     53475     neimenggu      112.4747       40.5231           78       170     2012      12        22        357              0.013625     -12.533752       0.000000       0.094838   -9999.000000   -9999.000000       0.011900       0.179000
53475     53475     neimenggu      112.4747       40.5231           78       170     2012      12        23        358              0.011708     -17.128357       0.000000       0.092604   -9999.000000   -9999.000000   -9999.000000       0.232000
53475     53475     neimenggu      112.4747       40.5231           78       170     2012      12        24        359              0.010250     -18.427322       0.000000       0.089926   -9999.000000   -9999.000000       0.019100       0.114000
53475     53475     neimenggu      112.4747       40.5231           78       170     2012      12        25        360              0.008375     -17.358490       0.000000       0.090207   -9999.000000   -9999.000000       0.013500       0.155000
53475     53475     neimenggu      112.4747       40.5231           78       170     2012      12        26        361              0.000000     -16.332947       0.000000       0.090354   -9999.000000   -9999.000000       0.017200       0.070000
53475     53475     neimenggu      112.4747       40.5231           78       170     2012      12        27        362              0.008000     -14.468597       0.000000       0.090904   -9999.000000   -9999.000000       0.018400       0.224000
53475     53475     neimenggu      112.4747       40.5231           78       170     2012      12        28        363              0.000000     -12.222351       0.000000       0.091584   -9999.000000   -9999.000000       0.010000       0.165000
53475     53475     neimenggu      112.4747       40.5231           78       170     2012      12        29        364              0.000000     -11.868683       0.000000       0.092003   -9999.000000   -9999.000000   -9999.000000       0.101000
53475     53475     neimenggu      112.4747       40.5231           78       170     2012      12        30        365              0.000000     -14.601654       0.000000       0.091305   -9999.000000   -9999.000000       0.018000       0.198000
53475     53475     neimenggu      112.4747       40.5231           78       170     2012      12        31        366              0.011000     -13.315216       0.000000       0.091336   -9999.000000   -9999.000000       0.010000   -9999.000000
