# Supplementary material for: Research on Fusing Multisatellite Soil Moisture Data Based on Bayesian Model Averaging
Source: Hindawi journal article supplement (doi:10.1155/2018/9310838), 2018-06-25
Supplement: f1 [file 9310838.f1.zip › 2012_sm00-10cm_daily_ZDB_ZHY_53486_366days_allin.txt]

53486     53486     shanxi         113.7667       40.3667           79       175     2012      01        01        001              0.000000   -9999.000000       0.000000   -9999.000000   -9999.000000   -9999.000000       0.035900   -9999.000000
53486     53486     shanxi         113.7667       40.3667           79       175     2012      01        02        002              0.032208      -8.423187       0.000000       0.098785   -9999.000000   -9999.000000       0.050300       0.097000
53486     53486     shanxi         113.7667       40.3667           79       175     2012      01        03        003              0.000000     -10.759003       0.000000       0.096945   -9999.000000   -9999.000000       0.049900       0.023000
53486     53486     shanxi         113.7667       40.3667           79       175     2012      01        04        004              0.028792     -12.461792       0.000000       0.096626   -9999.000000   -9999.000000       0.046400   -9999.000000
53486     53486     shanxi         113.7667       40.3667           79       175     2012      01        05        005              0.028292     -11.895264       0.000000       0.096198   -9999.000000   -9999.000000       0.057000       0.168000
53486     53486     shanxi         113.7667       40.3667           79       175     2012      01        06        006              0.027958     -11.332153       0.000000       0.096324   -9999.000000   -9999.000000       0.032300       0.026000
53486     53486     shanxi         113.7667       40.3667           79       175     2012      01        07        007              0.028292     -11.375885       0.000000       0.095567   -9999.000000   -9999.000000       0.041100       0.087000
53486     53486     shanxi         113.7667       40.3667           79       175     2012      01        08        008              0.000000     -11.046234       0.000000       0.095480   -9999.000000   -9999.000000       0.050100       0.035000
53486     53486     shanxi         113.7667       40.3667           79       175     2012      01        09        009              0.030500     -10.426758       0.000000       0.095436   -9999.000000   -9999.000000   -9999.000000   -9999.000000
53486     53486     shanxi         113.7667       40.3667           79       175     2012      01        10        010              0.029208      -9.923431       0.000000       0.095516   -9999.000000   -9999.000000       0.041700       0.134000
53486     53486     shanxi         113.7667       40.3667           79       175     2012      01        11        011              0.029125     -12.149902       0.000000       0.094404   -9999.000000   -9999.000000       0.052200       0.083000
53486     53486     shanxi         113.7667       40.3667           79       175     2012      01        12        012              0.029625     -11.058350       0.000000       0.093976   -9999.000000   -9999.000000       0.039800       0.038000
53486     53486     shanxi         113.7667       40.3667           79       175     2012      01        13        013              0.030083      -9.983002       0.000000       0.094893   -9999.000000   -9999.000000       0.043100       0.067000
53486     53486     shanxi         113.7667       40.3667           79       175     2012      01        14        014              0.030292      -9.592773       0.000000       0.095605   -9999.000000   -9999.000000       0.049400       0.043000
53486     53486     shanxi         113.7667       40.3667           79       175     2012      01        15        015              0.030833      -9.582489       0.000000       0.096346   -9999.000000   -9999.000000       0.050700       0.125000
53486     53486     shanxi         113.7667       40.3667           79       175     2012      01        16        016              0.028833      -9.471954       0.000000       0.097036   -9999.000000   -9999.000000       0.043300       0.097000
53486     53486     shanxi         113.7667       40.3667           79       175     2012      01        17        017              0.000000      -9.918610       0.000000       0.095593   -9999.000000   -9999.000000       0.051100       0.069000
53486     53486     shanxi         113.7667       40.3667           79       175     2012      01        18        018              0.030583      -9.469025       0.000000       0.096958   -9999.000000   -9999.000000       0.037200       0.035000
53486     53486     shanxi         113.7667       40.3667           79       175     2012      01        19        019              0.031292      -8.784637       0.000000       0.097116   -9999.000000   -9999.000000       0.052300       0.130000
53486     53486     shanxi         113.7667       40.3667           79       175     2012      01        20        020              0.027083      -8.891083       0.000000       0.097346   -9999.000000   -9999.000000       0.047400       0.041000
53486     53486     shanxi         113.7667       40.3667           79       175     2012      01        21        021              0.025458     -14.268402       0.000000       0.093531   -9999.000000   -9999.000000       0.038200       0.098000
53486     53486     shanxi         113.7667       40.3667           79       175     2012      01        22        022              0.021417     -15.900604       0.000000       0.092226   -9999.000000   -9999.000000       0.055400       0.070000
53486     53486     shanxi         113.7667       40.3667           79       175     2012      01        23        023              0.023833     -15.487946       0.000000       0.092012   -9999.000000   -9999.000000       0.034700       0.104000
53486     53486     shanxi         113.7667       40.3667           79       175     2012      01        24        024              0.023917     -14.280640       0.000000       0.092220   -9999.000000   -9999.000000   -9999.000000       0.149000
53486     53486     shanxi         113.7667       40.3667           79       175     2012      01        25        025              0.025625     -14.106842       0.000000       0.092276   -9999.000000   -9999.000000       0.051400       0.139000
53486     53486     shanxi         113.7667       40.3667           79       175     2012      01        26        026              0.025583     -11.633636       0.000000       0.092645   -9999.000000   -9999.000000       0.057300       0.087000
53486     53486     shanxi         113.7667       40.3667           79       175     2012      01        27        027              0.027208     -10.540771       0.000000       0.093333   -9999.000000   -9999.000000       0.048700       0.074000
53486     53486     shanxi         113.7667       40.3667           79       175     2012      01        28        028              0.027250      -9.408447       0.000000       0.094421   -9999.000000   -9999.000000       0.050900   -9999.000000
53486     53486     shanxi         113.7667       40.3667           79       175     2012      01        29        029              0.024625     -10.735748       0.000000       0.094174   -9999.000000   -9999.000000       0.040100       0.162000
53486     53486     shanxi         113.7667       40.3667           79       175     2012      01        30        030              0.027083     -11.170685       0.000000       0.092133   -9999.000000   -9999.000000       0.045400       0.103000
53486     53486     shanxi         113.7667       40.3667           79       175     2012      01        31        031              0.025667      -9.107727       0.000000       0.094025   -9999.000000   -9999.000000       0.052900       0.144000
53486     53486     shanxi         113.7667       40.3667           79       175     2012      02        01        032              0.023083     -12.377411       0.000000       0.091944   -9999.000000   -9999.000000       0.051700       0.087000
53486     53486     shanxi         113.7667       40.3667           79       175     2012      02        02        033              0.025792     -14.880432       0.000000       0.090612   -9999.000000   -9999.000000       0.053700   -9999.000000
53486     53486     shanxi         113.7667       40.3667           79       175     2012      02        03        034              0.025167     -12.678894       0.000000       0.090683   -9999.000000   -9999.000000       0.055500       0.123000
53486     53486     shanxi         113.7667       40.3667           79       175     2012      02        04        035              0.027000     -11.670288       0.000000       0.091396   -9999.000000   -9999.000000       0.036900       0.151000
53486     53486     shanxi         113.7667       40.3667           79       175     2012      02        05        036              0.029917     -10.304474       0.692957       0.091271   -9999.000000   -9999.000000       0.051900       0.151000
53486     53486     shanxi         113.7667       40.3667           79       175     2012      02        06        037              0.026500      -8.427917       0.000000       0.098257   -9999.000000   -9999.000000   -9999.000000       0.164000
53486     53486     shanxi         113.7667       40.3667           79       175     2012      02        07        038              0.025208     -15.131866       0.000000       0.091792   -9999.000000   -9999.000000       0.053700   -9999.000000
53486     53486     shanxi         113.7667       40.3667           79       175     2012      02        08        039              0.026750     -14.246704       0.000000       0.091278   -9999.000000   -9999.000000       0.062000       0.175000
53486     53486     shanxi         113.7667       40.3667           79       175     2012      02        09        040              0.026458     -11.750244       0.000000       0.091845   -9999.000000   -9999.000000       0.042300       0.191000
53486     53486     shanxi         113.7667       40.3667           79       175     2012      02        10        041              0.028333     -11.491638       0.000000       0.091879   -9999.000000   -9999.000000       0.047700       0.018000
53486     53486     shanxi         113.7667       40.3667           79       175     2012      02        11        042              0.029870      -9.831299       0.000000       0.093213   -9999.000000   -9999.000000       0.053700       0.158000
53486     53486     shanxi         113.7667       40.3667           79       175     2012      02        12        043              0.029583      -7.654327       0.000000       0.103123   -9999.000000   -9999.000000   -9999.000000       0.041000
53486     53486     shanxi         113.7667       40.3667           79       175     2012      02        13        044              0.033125      -7.476318       0.000000       0.100100   -9999.000000   -9999.000000   -9999.000000       0.253000
53486     53486     shanxi         113.7667       40.3667           79       175     2012      02        14        045              0.031958      -4.591980       0.000000       0.125632   -9999.000000   -9999.000000       0.063500       0.064000
53486     53486     shanxi         113.7667       40.3667           79       175     2012      02        15        046              0.029333      -7.790436       0.000000       0.113150   -9999.000000   -9999.000000       0.048600       0.062000
53486     53486     shanxi         113.7667       40.3667           79       175     2012      02        16        047              0.028458      -9.009674       0.000000       0.104932   -9999.000000   -9999.000000       0.051700       0.135000
53486     53486     shanxi         113.7667       40.3667           79       175     2012      02        17        048              0.028167     -11.392883       0.000000       0.098029   -9999.000000   -9999.000000       0.058400       0.092000
53486     53486     shanxi         113.7667       40.3667           79       175     2012      02        18        049              0.028625     -11.592773       1.045548       0.097103   -9999.000000   -9999.000000       0.056600       0.103000
53486     53486     shanxi         113.7667       40.3667           79       175     2012      02        19        050              0.029125      -9.673615       0.258045       0.099777   -9999.000000   -9999.000000       0.056000       0.234000
53486     53486     shanxi         113.7667       40.3667           79       175     2012      02        20        051              0.033250      -7.448944       0.000000       0.108360       0.082000   -9999.000000       0.067700       0.166000
53486     53486     shanxi         113.7667       40.3667           79       175     2012      02        21        052              0.037417      -4.192963       0.000000       0.136595   -9999.000000   -9999.000000   -9999.000000       0.023000
53486     53486     shanxi         113.7667       40.3667           79       175     2012      02        22        053              0.036542      -1.129669       0.000000       0.155780   -9999.000000   -9999.000000       0.060500       0.212000
53486     53486     shanxi         113.7667       40.3667           79       175     2012      02        23        054              0.040042      -4.039185       0.000000       0.142512       0.073000   -9999.000000   -9999.000000       0.022000
53486     53486     shanxi         113.7667       40.3667           79       175     2012      02        24        055              0.039208      -2.816986       0.000000       0.137787   -9999.000000   -9999.000000       0.049100       0.099000
53486     53486     shanxi         113.7667       40.3667           79       175     2012      02        25        056              0.035500      -6.188965       0.000000       0.124487   -9999.000000   -9999.000000       0.066500       0.115000
53486     53486     shanxi         113.7667       40.3667           79       175     2012      02        26        057              0.038625      -7.007904       0.000000       0.109012       0.067000   -9999.000000       0.047200   -9999.000000
53486     53486     shanxi         113.7667       40.3667           79       175     2012      02        27        058              0.040167      -5.303772       0.000000       0.129883   -9999.000000   -9999.000000   -9999.000000       0.205000
53486     53486     shanxi         113.7667       40.3667           79       175     2012      02        28        059              0.044250      -3.746399       0.000000       0.139746       0.076000       0.015000       0.059800       0.202000
53486     53486     shanxi         113.7667       40.3667           79       175     2012      02        29        060              0.000000   -9999.000000       0.000000   -9999.000000       0.083000   -9999.000000   -9999.000000   -9999.000000
53486     53486     shanxi         113.7667       40.3667           79       175     2012      03        01        061              0.048458      -1.462494       0.000000       0.153830   -9999.000000   -9999.000000       0.052100       0.169000
53486     53486     shanxi         113.7667       40.3667           79       175     2012      03        02        062              0.049875      -2.290833       0.041679       0.142807   -9999.000000       0.063000       0.069600   -9999.000000
53486     53486     shanxi         113.7667       40.3667           79       175     2012      03        03        063              0.052792      -2.037048       0.099001       0.143865   -9999.000000   -9999.000000       0.050900       0.232000
53486     53486     shanxi         113.7667       40.3667           79       175     2012      03        04        064              0.055208      -2.639832       0.000000       0.139786   -9999.000000   -9999.000000       0.061900       0.232000
53486     53486     shanxi         113.7667       40.3667           79       175     2012      03        05        065              0.043875      -1.831421       0.000000       0.146767   -9999.000000   -9999.000000       0.067500       0.100000
53486     53486     shanxi         113.7667       40.3667           79       175     2012      03        06        066              0.043333      -5.995026       0.000000       0.120004       0.084000       0.148200       0.055700       0.178000
53486     53486     shanxi         113.7667       40.3667           79       175     2012      03        07        067              0.000000      -4.373932       0.000000       0.124419       0.078000       0.042700       0.056900   -9999.000000
53486     53486     shanxi         113.7667       40.3667           79       175     2012      03        08        068              0.041375      -4.993988       0.000000       0.128516   -9999.000000   -9999.000000       0.064000       0.258000
53486     53486     shanxi         113.7667       40.3667           79       175     2012      03        09        069              0.049833      -5.504791       0.000000       0.124053   -9999.000000   -9999.000000       0.049400       0.250000
53486     53486     shanxi         113.7667       40.3667           79       175     2012      03        10        070              0.042583      -2.231934       0.000000       0.149285   -9999.000000       0.108800       0.057700       0.119000
53486     53486     shanxi         113.7667       40.3667           79       175     2012      03        11        071              0.042083      -7.543610       0.000000       0.115411       0.074000   -9999.000000   -9999.000000       0.081000
53486     53486     shanxi         113.7667       40.3667           79       175     2012      03        12        072              0.048125      -5.905060       0.254756       0.121496       0.079000   -9999.000000       0.055200       0.067000
53486     53486     shanxi         113.7667       40.3667           79       175     2012      03        13        073              0.061042      -2.513580       0.000000       0.146605       0.072000   -9999.000000       0.063100       0.326000
53486     53486     shanxi         113.7667       40.3667           79       175     2012      03        14        074              0.080217      -0.088104       0.000000       0.163980   -9999.000000       0.151100   -9999.000000       0.281000
53486     53486     shanxi         113.7667       40.3667           79       175     2012      03        15        075              0.088250       1.111389       0.000000       0.171305       0.071000       0.074800       0.061600       0.311000
53486     53486     shanxi         113.7667       40.3667           79       175     2012      03        16        076              0.118375       1.949951       0.000000       0.184375       0.089000   -9999.000000       0.068500       0.249000
53486     53486     shanxi         113.7667       40.3667           79       175     2012      03        17        077              0.120958       3.497192       0.000000       0.192210       0.080000       0.033700       0.065200       0.453000
53486     53486     shanxi         113.7667       40.3667           79       175     2012      03        18        078              0.122375       1.634125       0.000000       0.180584       0.076000       0.018600       0.056600       0.160000
53486     53486     shanxi         113.7667       40.3667           79       175     2012      03        19        079              0.127792       0.609833       0.000000       0.168432   -9999.000000   -9999.000000       0.067200       0.325000
53486     53486     shanxi         113.7667       40.3667           79       175     2012      03        20        080              0.129792       1.886383       0.073385       0.177439       0.072000       0.081600       0.057400       0.276000
53486     53486     shanxi         113.7667       40.3667           79       175     2012      03        21        081              0.130917       3.100800       0.614623       0.186622       0.093000   -9999.000000       0.082200       0.214000
53486     53486     shanxi         113.7667       40.3667           79       175     2012      03        22        082              0.135250       2.227966       0.105313       0.190881       0.083000   -9999.000000       0.082700       0.286000
53486     53486     shanxi         113.7667       40.3667           79       175     2012      03        23        083              0.132042       2.386780       0.000000       0.193674       0.075000   -9999.000000       0.060000       0.186000
53486     53486     shanxi         113.7667       40.3667           79       175     2012      03        24        084              0.131792       0.314240       0.000000       0.168624   -9999.000000   -9999.000000   -9999.000000       0.353000
53486     53486     shanxi         113.7667       40.3667           79       175     2012      03        25        085              0.000000       2.576813       0.000000       0.182801   -9999.000000       0.038800       0.069800       0.247000
53486     53486     shanxi         113.7667       40.3667           79       175     2012      03        26        086              0.136125       4.498718       0.000000       0.192114       0.072000   -9999.000000       0.057400   -9999.000000
53486     53486     shanxi         113.7667       40.3667           79       175     2012      03        27        087              0.137542       6.177521       0.000000       0.201181       0.074000   -9999.000000       0.064800       0.426000
53486     53486     shanxi         113.7667       40.3667           79       175     2012      03        28        088              0.140208       6.973846       0.150558       0.197512       0.078000       0.105600   -9999.000000       0.454000
53486     53486     shanxi         113.7667       40.3667           79       175     2012      03        29        089              0.139625       8.616302       0.000000       0.213688   -9999.000000   -9999.000000       0.054800       0.612000
53486     53486     shanxi         113.7667       40.3667           79       175     2012      03        30        090              0.133375       6.011536       0.000000       0.186486   -9999.000000       0.085900       0.075100       0.238000
53486     53486     shanxi         113.7667       40.3667           79       175     2012      03        31        091              0.136667       1.633728       0.000000       0.175653       0.069000   -9999.000000       0.057900   -9999.000000
53486     53486     shanxi         113.7667       40.3667           79       175     2012      04        01        092              0.137000       5.576935       0.000000       0.192449       0.073000       0.118100       0.065900       0.342000
53486     53486     shanxi         113.7667       40.3667           79       175     2012      04        02        093              0.132917       6.341003       0.247306       0.196335       0.082000       0.130600       0.072900       0.230000
53486     53486     shanxi         113.7667       40.3667           79       175     2012      04        03        094              0.133792       1.992767       0.000000       0.169664       0.068000   -9999.000000       0.067900       0.281000
53486     53486     shanxi         113.7667       40.3667           79       175     2012      04        04        095              0.137083       4.803467       0.000000       0.190160   -9999.000000       0.033300       0.063400       0.182000
53486     53486     shanxi         113.7667       40.3667           79       175     2012      04        05        096              0.136000       5.800201       0.000000       0.186490       0.070000   -9999.000000       0.082000   -9999.000000
53486     53486     shanxi         113.7667       40.3667           79       175     2012      04        06        097              0.138708       5.676056       0.195886       0.187716       0.077000   -9999.000000       0.060100       0.369000
53486     53486     shanxi         113.7667       40.3667           79       175     2012      04        07        098              0.141250       8.337921       0.000000       0.195687       0.074000       0.059400       0.069800       0.374000
53486     53486     shanxi         113.7667       40.3667           79       175     2012      04        08        099              0.141458      10.685394       0.000000       0.194247       0.073000   -9999.000000       0.068100       0.347000
53486     53486     shanxi         113.7667       40.3667           79       175     2012      04        09        100              0.143083      10.812134       0.000000       0.191815       0.071000       0.076900       0.059100       0.276000
53486     53486     shanxi         113.7667       40.3667           79       175     2012      04        10        101              0.140833      12.473022       0.516701       0.190679   -9999.000000   -9999.000000       0.068400       0.253000
53486     53486     shanxi         113.7667       40.3667           79       175     2012      04        11        102              0.137875       9.042389       0.000000       0.190114       0.064000   -9999.000000       0.065200       0.275000
53486     53486     shanxi         113.7667       40.3667           79       175     2012      04        12        103              0.139375       6.019470       0.000000       0.187969       0.079000       0.191700       0.056400       0.429000
53486     53486     shanxi         113.7667       40.3667           79       175     2012      04        13        104              0.142333       9.307953       0.000000       0.191172       0.070000   -9999.000000       0.062400       0.255000
53486     53486     shanxi         113.7667       40.3667           79       175     2012      04        14        105              0.144375      11.636292       0.000000       0.188543       0.071000   -9999.000000       0.073600       0.216000
53486     53486     shanxi         113.7667       40.3667           79       175     2012      04        15        106              0.142250      13.349213       0.000000       0.182527   -9999.000000       0.138200       0.053100       0.301000
53486     53486     shanxi         113.7667       40.3667           79       175     2012      04        16        107              0.142542      10.584259       0.000000       0.175178       0.064000   -9999.000000       0.079800       0.321000
53486     53486     shanxi         113.7667       40.3667           79       175     2012      04        17        108              0.145917      11.967926       0.000000       0.177492       0.073000       0.056300       0.062900       0.348000
53486     53486     shanxi         113.7667       40.3667           79       175     2012      04        18        109              0.141542      15.196777       2.824038       0.172685       0.081000   -9999.000000   -9999.000000       0.427000
53486     53486     shanxi         113.7667       40.3667           79       175     2012      04        19        110              0.142333      11.645477       0.000000       0.203108   -9999.000000       0.074800       0.071700   -9999.000000
53486     53486     shanxi         113.7667       40.3667           79       175     2012      04        20        111              0.142792      12.774078       0.257031       0.197762       0.086000       0.178500       0.099700       0.372000
53486     53486     shanxi         113.7667       40.3667           79       175     2012      04        21        112              0.145750      13.125580       0.000000       0.191422       0.068500   -9999.000000       0.069400       0.224000
53486     53486     shanxi         113.7667       40.3667           79       175     2012      04        22        113              0.147875      14.537109       0.000000       0.186408       0.071000       0.048600       0.084600       0.443000
53486     53486     shanxi         113.7667       40.3667           79       175     2012      04        23        114              0.149750      17.743256      17.091604       0.177679       0.069000   -9999.000000       0.067100       0.354000
53486     53486     shanxi         113.7667       40.3667           79       175     2012      04        24        115              0.140458      17.927582      11.516700       0.221211       0.141000       0.294300       0.106900   -9999.000000
53486     53486     shanxi         113.7667       40.3667           79       175     2012      04        25        116              0.000000       7.857147       0.000000       0.302387   -9999.000000       0.172200       0.083100       0.399000
53486     53486     shanxi         113.7667       40.3667           79       175     2012      04        26        117              0.142125       7.533295       0.355762       0.268427       0.073500   -9999.000000       0.065500       0.304000
53486     53486     shanxi         113.7667       40.3667           79       175     2012      04        27        118              0.142417      11.866669       0.000000       0.257604       0.067000       0.142900   -9999.000000       0.364000
53486     53486     shanxi         113.7667       40.3667           79       175     2012      04        28        119              0.145250       9.736908       0.000000       0.247632       0.073000   -9999.000000       0.058000       0.275000
53486     53486     shanxi         113.7667       40.3667           79       175     2012      04        29        120              0.148333      12.859009       0.000000       0.240381       0.069500       0.309100       0.069300   -9999.000000
53486     53486     shanxi         113.7667       40.3667           79       175     2012      04        30        121              0.218167      16.333710       1.450391       0.231987       0.070000       0.103800       0.077100       0.338000
53486     53486     shanxi         113.7667       40.3667           79       175     2012      05        01        122              0.225583      14.610260       0.446817       0.233855       0.085000   -9999.000000       0.095100       0.421000
53486     53486     shanxi         113.7667       40.3667           79       175     2012      05        02        123              0.209333      16.501312       0.000000       0.230698       0.068500   -9999.000000       0.070800       0.309000
53486     53486     shanxi         113.7667       40.3667           79       175     2012      05        03        124              0.201625      17.355072       0.000000       0.218583       0.071000       0.300200       0.088400       0.217000
53486     53486     shanxi         113.7667       40.3667           79       175     2012      05        04        125              0.197667      18.827087       0.000000       0.207931       0.070000   -9999.000000       0.062800   -9999.000000
53486     53486     shanxi         113.7667       40.3667           79       175     2012      05        05        126              0.195667      20.297546       0.000000       0.197345       0.068000       0.133300       0.063200       0.363000
53486     53486     shanxi         113.7667       40.3667           79       175     2012      05        06        127              0.196708      19.865601       0.000000       0.188457       0.068000   -9999.000000       0.072100       0.345000
53486     53486     shanxi         113.7667       40.3667           79       175     2012      05        07        128              0.193833      21.628296       0.413712       0.179419   -9999.000000       0.153100       0.071800       0.275000
53486     53486     shanxi         113.7667       40.3667           79       175     2012      05        08        129              0.196083      20.593018       0.000000       0.181288       0.065000       0.024100       0.075200       0.264000
53486     53486     shanxi         113.7667       40.3667           79       175     2012      05        09        130              0.192625      21.114197       0.424005       0.175858       0.100000       0.155700       0.082700       0.242000
53486     53486     shanxi         113.7667       40.3667           79       175     2012      05        10        131              0.201682      17.445862       9.751053       0.184845       0.065000       0.091200       0.069700       0.336000
53486     53486     shanxi         113.7667       40.3667           79       175     2012      05        11        132              0.243042      21.225891      14.171829       0.207384   -9999.000000   -9999.000000       0.164400       0.972000
53486     53486     shanxi         113.7667       40.3667           79       175     2012      05        12        133              0.222792      13.723267       0.000000       0.302107       0.129000       0.324200       0.143200       0.532000
53486     53486     shanxi         113.7667       40.3667           79       175     2012      05        13        134              0.207708      13.119415       0.000000       0.274591       0.093000       0.272200       0.100800       0.444000
53486     53486     shanxi         113.7667       40.3667           79       175     2012      05        14        135              0.199417      12.861938       0.000000       0.255285       0.083000   -9999.000000       0.121900       0.653000
53486     53486     shanxi         113.7667       40.3667           79       175     2012      05        15        136              0.197042      11.897156       0.117525       0.244363       0.078000       0.216500       0.085100       0.285000
53486     53486     shanxi         113.7667       40.3667           79       175     2012      05        16        137              0.196875      12.914886       0.000000       0.237191       0.092000   -9999.000000       0.086200       0.354000
53486     53486     shanxi         113.7667       40.3667           79       175     2012      05        17        138              0.200083      14.608551       0.000000       0.228935       0.079000   -9999.000000       0.093700       0.306000
53486     53486     shanxi         113.7667       40.3667           79       175     2012      05        18        139              0.197750      19.191376       0.494305       0.216181       0.084500       0.123600       0.115400   -9999.000000
53486     53486     shanxi         113.7667       40.3667           79       175     2012      05        19        140              0.198833      19.525330       1.062643       0.213995       0.076000   -9999.000000       0.120500       0.397000
53486     53486     shanxi         113.7667       40.3667           79       175     2012      05        20        141              0.199625      20.185791       0.374340       0.211946       0.098000   -9999.000000       0.116100       0.412000
53486     53486     shanxi         113.7667       40.3667           79       175     2012      05        21        142              0.194542      20.192505       1.571181       0.216350       0.186000       0.468000       0.154200       0.396000
53486     53486     shanxi         113.7667       40.3667           79       175     2012      05        22        143              0.194625      16.187408       0.000000       0.224875       0.111000   -9999.000000       0.105200       0.219000
53486     53486     shanxi         113.7667       40.3667           79       175     2012      05        23        144              0.192625      16.151642       0.000000       0.216839   -9999.000000       0.153600       0.107300   -9999.000000
53486     53486     shanxi         113.7667       40.3667           79       175     2012      05        24        145              0.194167      16.019073       0.000000       0.206158       0.086000   -9999.000000       0.104600       0.366000
53486     53486     shanxi         113.7667       40.3667           79       175     2012      05        25        146              0.000000      17.422791       0.069833       0.197558       0.105000       0.307200       0.110100       0.290000
53486     53486     shanxi         113.7667       40.3667           79       175     2012      05        26        147              0.194542      16.448639       0.000000       0.194989       0.093000       0.066100       0.113500       0.432000
53486     53486     shanxi         113.7667       40.3667           79       175     2012      05        27        148              0.194583      20.802460       0.000000       0.184171       0.091000   -9999.000000       0.087000       0.291000
53486     53486     shanxi         113.7667       40.3667           79       175     2012      05        28        149              0.195042      22.144440       2.375776       0.174410       0.092000       0.048500       0.096200   -9999.000000
53486     53486     shanxi         113.7667       40.3667           79       175     2012      05        29        150              0.187125      22.714355       1.490650       0.173969       0.165000       0.169500   -9999.000000       0.802000
53486     53486     shanxi         113.7667       40.3667           79       175     2012      05        30        151              0.189125      14.687317       0.000000       0.214887       0.103000       0.388800       0.106600   -9999.000000
53486     53486     shanxi         113.7667       40.3667           79       175     2012      05        31        152              0.211375      17.051117      11.408267       0.198455   -9999.000000       0.149800   -9999.000000   -9999.000000
53486     53486     shanxi         113.7667       40.3667           79       175     2012      06        01        153              0.208583      12.608185       0.000000       0.269628   -9999.000000   -9999.000000       0.142200       0.645000
53486     53486     shanxi         113.7667       40.3667           79       175     2012      06        02        154              0.203708      16.625946       0.632050       0.248528       0.125500       0.121000       0.100700   -9999.000000
53486     53486     shanxi         113.7667       40.3667           79       175     2012      06        03        155              0.194958      19.450317       0.344974       0.233082       0.146000       0.193400       0.121700       0.608000
53486     53486     shanxi         113.7667       40.3667           79       175     2012      06        04        156              0.197000      17.208740       0.000000       0.231775       0.104000       0.316800       0.161300       0.403000
53486     53486     shanxi         113.7667       40.3667           79       175     2012      06        05        157              0.198292      20.731567       0.000000       0.215166       0.103500       0.146900       0.144600       0.382000
53486     53486     shanxi         113.7667       40.3667           79       175     2012      06        06        158              0.192083      22.666138       1.631255       0.203328       0.139000   -9999.000000       0.213500       0.579000
53486     53486     shanxi         113.7667       40.3667           79       175     2012      06        07        159              0.195167      17.847992       0.339664       0.209721       0.112000   -9999.000000       0.132400       0.557000
53486     53486     shanxi         113.7667       40.3667           79       175     2012      06        08        160              0.195917      20.432983       0.564632       0.203120       0.109500   -9999.000000       0.136700       0.435000
53486     53486     shanxi         113.7667       40.3667           79       175     2012      06        09        161              0.190208      21.230804       1.155294       0.198242       0.093000   -9999.000000       0.159500       0.648000
53486     53486     shanxi         113.7667       40.3667           79       175     2012      06        10        162              0.189375      18.906799       0.000000       0.203141       0.082000       0.208600       0.133400       0.354000
53486     53486     shanxi         113.7667       40.3667           79       175     2012      06        11        163              0.000000      17.645905       0.000000       0.193632       0.114000   -9999.000000       0.129500       0.344000
53486     53486     shanxi         113.7667       40.3667           79       175     2012      06        12        164              0.188625      19.176697       0.000000       0.182855       0.136000       0.221100       0.137400       0.283000
53486     53486     shanxi         113.7667       40.3667           79       175     2012      06        13        165              0.186292      19.329803       0.618258       0.177930       0.120500       0.128500       0.106100       0.341000
53486     53486     shanxi         113.7667       40.3667           79       175     2012      06        14        166              0.180917      17.634094       0.169294       0.183907       0.138000   -9999.000000       0.134400       0.445000
53486     53486     shanxi         113.7667       40.3667           79       175     2012      06        15        167              0.184208      14.337402       0.000000       0.187361       0.112000       0.116300   -9999.000000       0.358000
53486     53486     shanxi         113.7667       40.3667           79       175     2012      06        16        168              0.188250      18.361145       0.000000       0.181950       0.112000   -9999.000000       0.111900   -9999.000000
53486     53486     shanxi         113.7667       40.3667           79       175     2012      06        17        169              0.188708      22.289062       0.000000       0.171491       0.107000       0.136700       0.121800       0.406000
53486     53486     shanxi         113.7667       40.3667           79       175     2012      06        18        170              0.187500      24.777924       0.000000       0.162500       0.102000       0.118500       0.119700       0.451000
53486     53486     shanxi         113.7667       40.3667           79       175     2012      06        19        171              0.182500      25.536194       1.747020       0.157671       0.077000   -9999.000000       0.193300       0.461000
53486     53486     shanxi         113.7667       40.3667           79       175     2012      06        20        172              0.180750      22.199615       0.755705       0.177147       0.157000       0.061400       0.157600       0.489000
53486     53486     shanxi         113.7667       40.3667           79       175     2012      06        21        173              0.185875      20.966217       2.406341       0.189980       0.157000   -9999.000000       0.213100   -9999.000000
53486     53486     shanxi         113.7667       40.3667           79       175     2012      06        22        174              0.190083      22.306488       3.945400       0.197515       0.160000   -9999.000000       0.175100       0.634000
53486     53486     shanxi         113.7667       40.3667           79       175     2012      06        23        175              0.197417      22.331146       7.926773       0.223777       0.123000       0.137400       0.231300       0.773000
53486     53486     shanxi         113.7667       40.3667           79       175     2012      06        24        176              0.214333      24.265930       1.480946       0.233512       0.212000   -9999.000000       0.181500       0.828000
53486     53486     shanxi         113.7667       40.3667           79       175     2012      06        25        177              0.207958      21.053070       2.165051       0.256132       0.147000   -9999.000000       0.177900       0.470000
53486     53486     shanxi         113.7667       40.3667           79       175     2012      06        26        178              0.201583      23.753174       2.239426       0.242480       0.213000       0.166000       0.254300   -9999.000000
53486     53486     shanxi         113.7667       40.3667           79       175     2012      06        27        179              0.202833      20.747925       5.032378       0.250190       0.216000       0.205700       0.245900       0.837000
53486     53486     shanxi         113.7667       40.3667           79       175     2012      06        28        180              0.238833      18.981781       9.236668       0.256268       0.213000       0.232800       0.287800       0.978000
53486     53486     shanxi         113.7667       40.3667           79       175     2012      06        29        181              0.237667      16.918915       0.000000       0.290415       0.190500   -9999.000000       0.236500       0.986000
53486     53486     shanxi         113.7667       40.3667           79       175     2012      06        30        182              0.229417      20.707977       0.000000       0.268966       0.139000       0.252200       0.156800   -9999.000000
53486     53486     shanxi         113.7667       40.3667           79       175     2012      07        01        183              0.219833      23.176422       0.000000       0.245848       0.132000       0.312000       0.158500   -9999.000000
53486     53486     shanxi         113.7667       40.3667           79       175     2012      07        02        184              0.209667      23.868774       0.000000       0.227744       0.140000   -9999.000000   -9999.000000       0.515000
53486     53486     shanxi         113.7667       40.3667           79       175     2012      07        03        185              0.200792      23.788910       0.000000       0.214012       0.155000       0.171900       0.152900       0.549000
53486     53486     shanxi         113.7667       40.3667           79       175     2012      07        04        186              0.190333      25.285065       0.487800       0.202365       0.143500   -9999.000000       0.182600       0.473000
53486     53486     shanxi         113.7667       40.3667           79       175     2012      07        05        187              0.180292      24.972992       3.194118       0.199340       0.143000   -9999.000000       0.139300       1.000000
53486     53486     shanxi         113.7667       40.3667           79       175     2012      07        06        188              0.172917      24.527832       0.056417       0.217230   -9999.000000       0.199700       0.157900       0.551000
53486     53486     shanxi         113.7667       40.3667           79       175     2012      07        07        189              0.160375      25.915436       1.036888       0.211813   -9999.000000   -9999.000000       0.196500       0.588000
53486     53486     shanxi         113.7667       40.3667           79       175     2012      07        08        190              0.159292      23.475372      13.531899       0.213179       0.234000       0.095200       0.237600       0.830000
53486     53486     shanxi         113.7667       40.3667           79       175     2012      07        09        191              0.184083      23.768738       0.351529       0.257953       0.186500       0.244700       0.231600       0.574000
53486     53486     shanxi         113.7667       40.3667           79       175     2012      07        10        192              0.175042      24.112854       4.331682       0.261484       0.198500   -9999.000000       0.267500       0.666000
53486     53486     shanxi         113.7667       40.3667           79       175     2012      07        11        193              0.158042      22.735565       0.539482       0.264977       0.176000       0.132300       0.184900       0.515000
53486     53486     shanxi         113.7667       40.3667           79       175     2012      07        12        194              0.148333      23.159454       2.506981       0.245090       0.174000   -9999.000000       0.231100       0.829000
53486     53486     shanxi         113.7667       40.3667           79       175     2012      07        13        195              0.153208      22.281830       0.304827       0.251590       0.187000   -9999.000000       0.196700       0.590000
53486     53486     shanxi         113.7667       40.3667           79       175     2012      07        14        196              0.145083      22.538422       4.596818       0.240849       0.203000   -9999.000000       0.209900       0.584000
53486     53486     shanxi         113.7667       40.3667           79       175     2012      07        15        197              0.154333      20.602509       0.000000       0.261740       0.167500   -9999.000000       0.221900   -9999.000000
53486     53486     shanxi         113.7667       40.3667           79       175     2012      07        16        198              0.163750      23.178650       0.025266       0.237173       0.161000       0.185800       0.177500       0.478000
53486     53486     shanxi         113.7667       40.3667           79       175     2012      07        17        199              0.264958      23.971436       0.000000       0.221174       0.169000   -9999.000000       0.191700       0.442000
53486     53486     shanxi         113.7667       40.3667           79       175     2012      07        18        200              0.247083      24.457031       1.555293       0.208677       0.151000       0.279100       0.207800       0.509000
53486     53486     shanxi         113.7667       40.3667           79       175     2012      07        19        201              0.237708      24.885132       0.153955       0.201311       0.160000       0.141500       0.236700       0.450000
53486     53486     shanxi         113.7667       40.3667           79       175     2012      07        20        202              0.231000      25.408539       1.837936       0.196007       0.148000   -9999.000000       0.210000   -9999.000000
53486     53486     shanxi         113.7667       40.3667           79       175     2012      07        21        203              0.264609      26.561340      36.832191       0.190326       0.314000   -9999.000000       0.351100       1.000000
53486     53486     shanxi         113.7667       40.3667           79       175     2012      07        22        204              0.245875      18.340790       0.057802       0.328743       0.310000   -9999.000000       0.288600       0.841000
53486     53486     shanxi         113.7667       40.3667           79       175     2012      07        23        205              0.236542      20.834198       0.356030       0.284810       0.206000       0.266900       0.278200       0.875000
53486     53486     shanxi         113.7667       40.3667           79       175     2012      07        24        206              0.232625      21.635712       6.178264       0.270228   -9999.000000       0.181600       0.245500       0.445000
53486     53486     shanxi         113.7667       40.3667           79       175     2012      07        25        207              0.236417      24.036865       6.538117       0.274532       0.297000   -9999.000000       0.301500   -9999.000000
53486     53486     shanxi         113.7667       40.3667           79       175     2012      07        26        208              0.238833      20.783417       2.289628       0.293854       0.294000       0.265000       0.304200       1.000000
53486     53486     shanxi         113.7667       40.3667           79       175     2012      07        27        209              0.250542      22.870178       4.660536       0.288258       0.273000       0.240500       0.370000       0.884000
53486     53486     shanxi         113.7667       40.3667           79       175     2012      07        28        210              0.252458      23.545135       3.772835       0.285998       0.272000   -9999.000000       0.313000       1.000000
53486     53486     shanxi         113.7667       40.3667           79       175     2012      07        29        211              0.240000      22.330963       0.000000       0.289789       0.213000       0.277900       0.294400       0.618000
53486     53486     shanxi         113.7667       40.3667           79       175     2012      07        30        212              0.254667      22.919098      69.165527       0.270821   -9999.000000   -9999.000000   -9999.000000   -9999.000000
53486     53486     shanxi         113.7667       40.3667           79       175     2012      07        31        213              0.260458      18.707214       0.947304       0.333299       0.306500   -9999.000000       0.193600       1.000000
53486     53486     shanxi         113.7667       40.3667           79       175     2012      08        01        214              0.247833      18.783844       1.993719       0.328500       0.330000   -9999.000000       0.207700       1.000000
53486     53486     shanxi         113.7667       40.3667           79       175     2012      08        02        215              0.241833      19.985352       0.000000       0.310421       0.308000   -9999.000000       0.190600       0.985000
53486     53486     shanxi         113.7667       40.3667           79       175     2012      08        03        216              0.237125      22.706360       0.327891       0.298143       0.219500       0.165300       0.176400       0.831000
53486     53486     shanxi         113.7667       40.3667           79       175     2012      08        04        217              0.232583      23.165863       0.000000       0.289615       0.221000   -9999.000000       0.164200       0.939000
53486     53486     shanxi         113.7667       40.3667           79       175     2012      08        05        218              0.228083      24.402618       0.160616       0.279550       0.212000       0.493700       0.178500       0.657000
53486     53486     shanxi         113.7667       40.3667           79       175     2012      08        06        219              0.227042      24.050629       4.599234       0.273197       0.213500       0.114300       0.154600       0.939000
53486     53486     shanxi         113.7667       40.3667           79       175     2012      08        07        220              0.239417      24.198944       4.458120       0.280393       0.210000   -9999.000000   -9999.000000       0.975000
53486     53486     shanxi         113.7667       40.3667           79       175     2012      08        08        221              0.240625      23.353607       0.026739       0.290436       0.215500       0.180700       0.156800       0.830000
53486     53486     shanxi         113.7667       40.3667           79       175     2012      08        09        222              0.230792      21.450226       0.110718       0.279411       0.186000   -9999.000000       0.149100       0.790000
53486     53486     shanxi         113.7667       40.3667           79       175     2012      08        10        223              0.223500      22.887665       0.052333       0.266575       0.184000       0.259600       0.142100       0.653000
53486     53486     shanxi         113.7667       40.3667           79       175     2012      08        11        224              0.223583      22.700043       6.588839       0.259316       0.281500       0.104700       0.166600       1.000000
53486     53486     shanxi         113.7667       40.3667           79       175     2012      08        12        225              0.223333      17.386444       0.000000       0.286800       0.229000   -9999.000000       0.155500       0.573000
53486     53486     shanxi         113.7667       40.3667           79       175     2012      08        13        226              0.217833      20.681610       0.318471       0.271295       0.203000       0.127800       0.212800   -9999.000000
53486     53486     shanxi         113.7667       40.3667           79       175     2012      08        14        227              0.232958      20.958374       5.872909       0.262259       0.266000   -9999.000000       0.222500       0.855000
53486     53486     shanxi         113.7667       40.3667           79       175     2012      08        15        228              0.235333      18.269897       0.000000       0.284470       0.230000       0.283400       0.211100       0.821000
53486     53486     shanxi         113.7667       40.3667           79       175     2012      08        16        229              0.228542      19.478180       0.469164       0.270421       0.202000       0.167700   -9999.000000       0.784000
53486     53486     shanxi         113.7667       40.3667           79       175     2012      08        17        230              0.224875      21.065887       0.737112       0.261854       0.215000       0.638800       0.167600       0.614000
53486     53486     shanxi         113.7667       40.3667           79       175     2012      08        18        231              0.218750      20.856354       0.161773       0.262127       0.204000   -9999.000000       0.205400   -9999.000000
53486     53486     shanxi         113.7667       40.3667           79       175     2012      08        19        232              0.219375      18.349182       0.107307       0.259835       0.181500       0.065000       0.170600       0.669000
53486     53486     shanxi         113.7667       40.3667           79       175     2012      08        20        233              0.211167      21.522125       0.087990       0.250151       0.182000       0.180400       0.199000       0.580000
53486     53486     shanxi         113.7667       40.3667           79       175     2012      08        21        234              0.206417      18.334534       0.000000       0.245026       0.181500       0.071700       0.196700       0.571000
53486     53486     shanxi         113.7667       40.3667           79       175     2012      08        22        235              0.204000      16.121521       0.000000       0.237765       0.189500       0.190500       0.218200   -9999.000000
53486     53486     shanxi         113.7667       40.3667           79       175     2012      08        23        236              0.204667      17.739471       0.000000       0.232374       0.172000       0.220900       0.189300   -9999.000000
53486     53486     shanxi         113.7667       40.3667           79       175     2012      08        24        237              0.204042      19.291229       0.000000       0.227650       0.167000       0.153800       0.209400       0.588000
53486     53486     shanxi         113.7667       40.3667           79       175     2012      08        25        238              0.000000      20.242523       2.007522       0.222756       0.182000       0.131800       0.186900       0.655000
53486     53486     shanxi         113.7667       40.3667           79       175     2012      08        26        239              0.204375      21.751770       1.116384       0.218927       0.200000       0.098400       0.207600       0.605000
53486     53486     shanxi         113.7667       40.3667           79       175     2012      08        27        240              0.207000      21.763123       7.553637       0.223336       0.206000   -9999.000000       0.168300       0.661000
53486     53486     shanxi         113.7667       40.3667           79       175     2012      08        28        241              0.211500      19.924866       0.000000       0.267555       0.186000       0.129000       0.151200   -9999.000000
53486     53486     shanxi         113.7667       40.3667           79       175     2012      08        29        242              0.206000      20.250000       0.000000       0.251912       0.181000       0.316600       0.171900       0.586000
53486     53486     shanxi         113.7667       40.3667           79       175     2012      08        30        243              0.203250      21.806885       0.000000       0.237262       0.169000       0.062400       0.171900       0.669000
53486     53486     shanxi         113.7667       40.3667           79       175     2012      08        31        244              0.198083      22.005280       0.668562       0.228565       0.194000       0.067900       0.162600       0.465000
53486     53486     shanxi         113.7667       40.3667           79       175     2012      09        01        245              0.240500      19.822662      57.564011       0.232298       0.238000       0.041300       0.202500       1.000000
53486     53486     shanxi         113.7667       40.3667           79       175     2012      09        02        246              0.244208      15.298889       1.424852       0.332746       0.295000   -9999.000000   -9999.000000       1.000000
53486     53486     shanxi         113.7667       40.3667           79       175     2012      09        03        247              0.227708      14.430908       0.308041       0.312764       0.252000       0.402000       0.174300       0.848000
53486     53486     shanxi         113.7667       40.3667           79       175     2012      09        04        248              0.220000      11.943726       0.000000       0.296798       0.176000   -9999.000000       0.194200       0.726000
53486     53486     shanxi         113.7667       40.3667           79       175     2012      09        05        249              0.215833      14.147583       0.000000       0.286947       0.186000       0.288100       0.145300       0.562000
53486     53486     shanxi         113.7667       40.3667           79       175     2012      09        06        250              0.213667      16.075592       0.031282       0.279633       0.197000       0.166600       0.153000       0.587000
53486     53486     shanxi         113.7667       40.3667           79       175     2012      09        07        251              0.212000      16.925323       0.000000       0.275158       0.174000   -9999.000000       0.152300       0.603000
53486     53486     shanxi         113.7667       40.3667           79       175     2012      09        08        252              0.208500      16.973694       0.000000       0.270385       0.167000       0.128300       0.153600       0.561000
53486     53486     shanxi         113.7667       40.3667           79       175     2012      09        09        253              0.205917      17.967987       0.000000       0.264897       0.170000   -9999.000000       0.140100       0.666000
53486     53486     shanxi         113.7667       40.3667           79       175     2012      09        10        254              0.202333      18.875763       1.324399       0.259354       0.175000   -9999.000000       0.151500       0.529000
53486     53486     shanxi         113.7667       40.3667           79       175     2012      09        11        255              0.200083      16.412781       0.090401       0.265838       0.154000       0.241300       0.123500   -9999.000000
53486     53486     shanxi         113.7667       40.3667           79       175     2012      09        12        256              0.192000      14.626648       0.000000       0.261776       0.137000   -9999.000000       0.132000       0.491000
53486     53486     shanxi         113.7667       40.3667           79       175     2012      09        13        257              0.188458      11.008423       1.086803       0.257986       0.170000       0.078000       0.164500       0.750000
53486     53486     shanxi         113.7667       40.3667           79       175     2012      09        14        258              0.189250      10.514252       0.021456       0.261639       0.137000   -9999.000000       0.130100       0.704000
53486     53486     shanxi         113.7667       40.3667           79       175     2012      09        15        259              0.188417      12.036377       0.000000       0.257301       0.156000       0.226000       0.145600       0.477000
53486     53486     shanxi         113.7667       40.3667           79       175     2012      09        16        260              0.187083      13.447662       0.088333       0.252737       0.149000       0.098800       0.111500   -9999.000000
53486     53486     shanxi         113.7667       40.3667           79       175     2012      09        17        261              0.186333      13.628143       0.000000       0.250515       0.139000   -9999.000000       0.100700       0.533000
53486     53486     shanxi         113.7667       40.3667           79       175     2012      09        18        262              0.185875      13.282837       4.734146       0.250239       0.139500       0.106500       0.107600       0.489000
53486     53486     shanxi         113.7667       40.3667           79       175     2012      09        19        263              0.184792      14.638062       0.645638       0.252455       0.138000   -9999.000000       0.129000       0.572000
53486     53486     shanxi         113.7667       40.3667           79       175     2012      09        20        264              0.183792      14.339355       0.503963       0.269293       0.135000   -9999.000000       0.103500       0.494000
53486     53486     shanxi         113.7667       40.3667           79       175     2012      09        21        265              0.183167      15.624176       0.067094       0.259227   -9999.000000       0.172300       0.118400   -9999.000000
53486     53486     shanxi         113.7667       40.3667           79       175     2012      09        22        266              0.183458      13.166718       0.000000       0.259728       0.126000   -9999.000000       0.102200       0.533000
53486     53486     shanxi         113.7667       40.3667           79       175     2012      09        23        267              0.180417      15.402191       6.101849       0.253602       0.110500       0.230700       0.112700       0.733000
53486     53486     shanxi         113.7667       40.3667           79       175     2012      09        24        268              0.182167      14.350342       8.580253       0.274486       0.142000   -9999.000000       0.128800       0.613000
53486     53486     shanxi         113.7667       40.3667           79       175     2012      09        25        269              0.222565      14.748383      12.100811       0.284774       0.208000   -9999.000000       0.142900       0.892000
53486     53486     shanxi         113.7667       40.3667           79       175     2012      09        26        270              0.221708      10.368988       3.986509       0.316709       0.185000       0.203200       0.154500   -9999.000000
53486     53486     shanxi         113.7667       40.3667           79       175     2012      09        27        271              0.220429      12.795197       0.406820       0.299301   -9999.000000   -9999.000000       0.177000       0.907000
53486     53486     shanxi         113.7667       40.3667           79       175     2012      09        28        272              0.203733       8.955597       0.083538       0.292346       0.173000   -9999.000000       0.139700       0.705000
53486     53486     shanxi         113.7667       40.3667           79       175     2012      09        29        273              0.199708       8.387207       0.000000       0.281403       0.163000   -9999.000000       0.147200       0.722000
53486     53486     shanxi         113.7667       40.3667           79       175     2012      09        30        274              0.195625       9.348480       0.000000       0.275705       0.146000   -9999.000000   -9999.000000       0.473000
53486     53486     shanxi         113.7667       40.3667           79       175     2012      10        01        275              0.193417      10.655701       0.000000       0.271418       0.113500   -9999.000000       0.098400       0.483000
53486     53486     shanxi         113.7667       40.3667           79       175     2012      10        02        276              0.191500      12.241150       0.225099       0.267091       0.121000   -9999.000000       0.126500       0.620000
53486     53486     shanxi         113.7667       40.3667           79       175     2012      10        03        277              0.187417      12.931061       0.295667       0.263341       0.130000       0.101600       0.096700       0.458000
53486     53486     shanxi         113.7667       40.3667           79       175     2012      10        04        278              0.189542      10.751526       3.621110       0.259894   -9999.000000       0.173900       0.127400       0.776000
53486     53486     shanxi         113.7667       40.3667           79       175     2012      10        05        279              0.196875       7.469116       0.179142       0.278727       0.143000       0.292700       0.135900       0.647000
53486     53486     shanxi         113.7667       40.3667           79       175     2012      10        06        280              0.193333       9.293549       0.000000       0.270765       0.143000       0.324200       0.129100       0.702000
53486     53486     shanxi         113.7667       40.3667           79       175     2012      10        07        281              0.190417      10.391388       0.000000       0.265025       0.122000       0.055100       0.106900       0.537000
53486     53486     shanxi         113.7667       40.3667           79       175     2012      10        08        282              0.189792      11.090240       1.047464       0.262251       0.161000       0.435500       0.123300       0.677000
53486     53486     shanxi         113.7667       40.3667           79       175     2012      10        09        283              0.184292      11.589600       0.113254       0.264752       0.133000       0.187900       0.103600       0.477000
53486     53486     shanxi         113.7667       40.3667           79       175     2012      10        10        284              0.181375       6.830078       0.000000       0.260463       0.133000   -9999.000000       0.101800   -9999.000000
53486     53486     shanxi         113.7667       40.3667           79       175     2012      10        11        285              0.181958       7.659302       0.071166       0.259228       0.109000       0.126900       0.105700       0.527000
53486     53486     shanxi         113.7667       40.3667           79       175     2012      10        12        286              0.181833       9.912231       0.000000       0.256010       0.099000   -9999.000000       0.091700       0.428000
53486     53486     shanxi         113.7667       40.3667           79       175     2012      10        13        287              0.176125       9.715881       0.000000       0.250539   -9999.000000   -9999.000000       0.101400       0.441000
53486     53486     shanxi         113.7667       40.3667           79       175     2012      10        14        288              0.176292       6.388611       0.436313       0.243440       0.110500       0.071100       0.110100       0.462000
53486     53486     shanxi         113.7667       40.3667           79       175     2012      10        15        289              0.184042       7.901520       9.582530       0.251484       0.102000   -9999.000000       0.081800   -9999.000000
53486     53486     shanxi         113.7667       40.3667           79       175     2012      10        16        290              0.201292       8.305695       0.013167       0.271209   -9999.000000   -9999.000000       0.153700       0.934000
53486     53486     shanxi         113.7667       40.3667           79       175     2012      10        17        291              0.189583       3.471191       0.000000       0.251388       0.166000       0.140700   -9999.000000       0.684000
53486     53486     shanxi         113.7667       40.3667           79       175     2012      10        18        292              0.186375       3.788849       1.136197       0.251821   -9999.000000       0.318400       0.080600       0.673000
53486     53486     shanxi         113.7667       40.3667           79       175     2012      10        19        293              0.183875       5.259735       0.000000       0.260700   -9999.000000       0.143600       0.094100       0.476000
53486     53486     shanxi         113.7667       40.3667           79       175     2012      10        20        294              0.183625       7.046631       0.505444       0.263333       0.118000   -9999.000000       0.083300   -9999.000000
53486     53486     shanxi         113.7667       40.3667           79       175     2012      10        21        295              0.208542       8.685150      11.438364       0.263234   -9999.000000   -9999.000000       0.097400       0.969000
53486     53486     shanxi         113.7667       40.3667           79       175     2012      10        22        296              0.206083       4.454285       0.175486       0.297570   -9999.000000   -9999.000000       0.134900       0.726000
53486     53486     shanxi         113.7667       40.3667           79       175     2012      10        23        297              0.198375       4.240082       0.000000       0.280548   -9999.000000   -9999.000000       0.100400       0.761000
53486     53486     shanxi         113.7667       40.3667           79       175     2012      10        24        298              0.193125       5.788757       0.000000       0.273516   -9999.000000       0.235100       0.084500       0.548000
53486     53486     shanxi         113.7667       40.3667           79       175     2012      10        25        299              0.000000       6.414703       0.067900       0.269943       0.119000   -9999.000000       0.099800   -9999.000000
53486     53486     shanxi         113.7667       40.3667           79       175     2012      10        26        300              0.187250       7.393707       0.220468       0.268784       0.119500   -9999.000000       0.084400       0.557000
53486     53486     shanxi         113.7667       40.3667           79       175     2012      10        27        301              0.184833       6.817719       0.100709       0.268286       0.114000       0.157500       0.092400       0.544000
53486     53486     shanxi         113.7667       40.3667           79       175     2012      10        28        302              0.000000       5.550385       0.000000       0.250890       0.096000   -9999.000000       0.092300       0.577000
53486     53486     shanxi         113.7667       40.3667           79       175     2012      10        29        303              0.175792       5.660370       0.096595       0.258133   -9999.000000       0.105700       0.060100       0.293000
53486     53486     shanxi         113.7667       40.3667           79       175     2012      10        30        304              0.171583       2.291656       0.328727       0.213840   -9999.000000   -9999.000000       0.072600       0.300000
53486     53486     shanxi         113.7667       40.3667           79       175     2012      10        31        305              0.171375       0.993866       0.000000       0.196818       0.091000   -9999.000000       0.070300       0.282000
53486     53486     shanxi         113.7667       40.3667           79       175     2012      11        01        306              0.171625       1.612457       0.000000       0.206207       0.093000       0.048600       0.066600       0.374000
53486     53486     shanxi         113.7667       40.3667           79       175     2012      11        02        307              0.173542       2.768555       1.763539       0.226568       0.095000   -9999.000000       0.075600       0.289000
53486     53486     shanxi         113.7667       40.3667           79       175     2012      11        03        308              0.170958       5.125336       0.794732       0.254450   -9999.000000   -9999.000000   -9999.000000       0.368000
53486     53486     shanxi         113.7667       40.3667           79       175     2012      11        04        309              0.152375      -1.548859       0.000000       0.185175   -9999.000000   -9999.000000       0.051900       0.279000
53486     53486     shanxi         113.7667       40.3667           79       175     2012      11        05        310              0.149000      -4.584167       0.272878       0.115749   -9999.000000   -9999.000000       0.058300       0.336000
53486     53486     shanxi         113.7667       40.3667           79       175     2012      11        06        311              0.156708      -2.507141       0.159827       0.140365       0.119000       0.035900       0.055700       0.368000
53486     53486     shanxi         113.7667       40.3667           79       175     2012      11        07        312              0.160833      -0.200134       0.052048       0.171049   -9999.000000   -9999.000000       0.058200       0.277000
53486     53486     shanxi         113.7667       40.3667           79       175     2012      11        08        313              0.158833      -0.900665       0.202647       0.165682       0.123000   -9999.000000   -9999.000000   -9999.000000
53486     53486     shanxi         113.7667       40.3667           79       175     2012      11        09        314              0.163333       0.333282       3.872737       0.180875   -9999.000000       0.103100       0.055300       0.493000
53486     53486     shanxi         113.7667       40.3667           79       175     2012      11        10        315              0.170375       1.285614       2.547446       0.202724   -9999.000000   -9999.000000       0.039200       0.336000
53486     53486     shanxi         113.7667       40.3667           79       175     2012      11        11        316              0.143125      -0.423218       0.000000       0.163032   -9999.000000       0.036700       0.048000       0.207000
53486     53486     shanxi         113.7667       40.3667           79       175     2012      11        12        317              0.114625      -1.702484       0.000000       0.136900   -9999.000000   -9999.000000       0.034000       0.254000
53486     53486     shanxi         113.7667       40.3667           79       175     2012      11        13        318              0.000000      -2.072601       0.000000       0.129915   -9999.000000       0.206800       0.043400   -9999.000000
53486     53486     shanxi         113.7667       40.3667           79       175     2012      11        14        319              0.079043      -3.127838       0.239941       0.122911   -9999.000000       0.037100       0.045400       0.389000
53486     53486     shanxi         113.7667       40.3667           79       175     2012      11        15        320              0.092292      -3.614014       3.831834       0.126618   -9999.000000   -9999.000000       0.037200       0.245000
53486     53486     shanxi         113.7667       40.3667           79       175     2012      11        16        321              0.104292      -0.546783       0.000000       0.153513   -9999.000000   -9999.000000       0.040900       0.214000
53486     53486     shanxi         113.7667       40.3667           79       175     2012      11        17        322              0.000000      -2.984802       0.000000       0.128152   -9999.000000   -9999.000000       0.025600       0.226000
53486     53486     shanxi         113.7667       40.3667           79       175     2012      11        18        323              0.087375      -2.831543       0.000000       0.135777   -9999.000000   -9999.000000       0.045000   -9999.000000
53486     53486     shanxi         113.7667       40.3667           79       175     2012      11        19        324              0.085750      -3.456238       0.000000       0.140750   -9999.000000       0.083500       0.046200       0.419000
53486     53486     shanxi         113.7667       40.3667           79       175     2012      11        20        325              0.092917      -3.409180       0.000000       0.131949   -9999.000000   -9999.000000       0.049500       0.234000
53486     53486     shanxi         113.7667       40.3667           79       175     2012      11        21        326              0.107833      -2.124756       0.000000       0.142441   -9999.000000   -9999.000000       0.036400       0.365000
53486     53486     shanxi         113.7667       40.3667           79       175     2012      11        22        327              0.109583      -0.329895       0.000000       0.167927   -9999.000000   -9999.000000       0.038300       0.153000
53486     53486     shanxi         113.7667       40.3667           79       175     2012      11        23        328              0.069292      -6.417786       0.000000       0.118573   -9999.000000       0.139500       0.038900   -9999.000000
53486     53486     shanxi         113.7667       40.3667           79       175     2012      11        24        329              0.074167      -7.066101       0.000000       0.106562   -9999.000000       0.070800       0.041900       0.270000
53486     53486     shanxi         113.7667       40.3667           79       175     2012      11        25        330              0.070500      -3.675537       0.000000       0.121045   -9999.000000   -9999.000000       0.043200       0.152000
53486     53486     shanxi         113.7667       40.3667           79       175     2012      11        26        331              0.062625      -5.890228       0.000000       0.111473   -9999.000000   -9999.000000   -9999.000000       0.231000
53486     53486     shanxi         113.7667       40.3667           79       175     2012      11        27        332              0.066792      -5.471313       0.105330       0.108586   -9999.000000   -9999.000000       0.037400       0.097000
53486     53486     shanxi         113.7667       40.3667           79       175     2012      11        28        333              0.057000      -4.810730       0.000000       0.122375   -9999.000000       0.218500       0.043200       0.175000
53486     53486     shanxi         113.7667       40.3667           79       175     2012      11        29        334              0.051875      -8.745544       0.000000       0.103695   -9999.000000   -9999.000000       0.031100       0.184000
53486     53486     shanxi         113.7667       40.3667           79       175     2012      11        30        335              0.048042      -8.526093       0.000000       0.102604   -9999.000000   -9999.000000       0.041000       0.150000
53486     53486     shanxi         113.7667       40.3667           79       175     2012      12        01        336              0.045875      -8.806854       0.000000       0.101161   -9999.000000   -9999.000000   -9999.000000       0.019000
53486     53486     shanxi         113.7667       40.3667           79       175     2012      12        02        337              0.047667      -8.271362       0.113567       0.102084   -9999.000000   -9999.000000       0.029200       0.136000
53486     53486     shanxi         113.7667       40.3667           79       175     2012      12        03        338              0.044667      -6.483856       0.000000       0.104437   -9999.000000   -9999.000000       0.035100       0.129000
53486     53486     shanxi         113.7667       40.3667           79       175     2012      12        04        339              0.043125     -10.374359       0.000000       0.101216   -9999.000000   -9999.000000       0.032600       0.044000
53486     53486     shanxi         113.7667       40.3667           79       175     2012      12        05        340              0.040042      -9.369659       0.000000       0.100981   -9999.000000   -9999.000000       0.033800       0.082000
53486     53486     shanxi         113.7667       40.3667           79       175     2012      12        06        341              0.040875     -12.708466       0.000000       0.099801   -9999.000000   -9999.000000       0.041200       0.028000
53486     53486     shanxi         113.7667       40.3667           79       175     2012      12        07        342              0.039375     -10.692657       0.000000       0.100261   -9999.000000   -9999.000000       0.036800   -9999.000000
53486     53486     shanxi         113.7667       40.3667           79       175     2012      12        08        343              0.035375     -13.769379       0.000000       0.098447   -9999.000000   -9999.000000       0.030300       0.219000
53486     53486     shanxi         113.7667       40.3667           79       175     2012      12        09        344              0.035500     -16.190582       0.000000       0.095489   -9999.000000   -9999.000000       0.035900       0.031000
53486     53486     shanxi         113.7667       40.3667           79       175     2012      12        10        345              0.036792     -12.531097       0.000000       0.095821   -9999.000000   -9999.000000       0.026900       0.091000
53486     53486     shanxi         113.7667       40.3667           79       175     2012      12        11        346              0.036917     -10.727844       0.000000       0.096515   -9999.000000   -9999.000000       0.036200       0.049000
53486     53486     shanxi         113.7667       40.3667           79       175     2012      12        12        347              0.036042     -10.139221       0.000000       0.096742   -9999.000000   -9999.000000       0.037100   -9999.000000
53486     53486     shanxi         113.7667       40.3667           79       175     2012      12        13        348              0.038208      -9.818207       1.824272       0.096935   -9999.000000   -9999.000000       0.031500       0.198000
53486     53486     shanxi         113.7667       40.3667           79       175     2012      12        14        349              0.041750      -8.593170       0.457519       0.097678   -9999.000000   -9999.000000       0.030500       0.067000
53486     53486     shanxi         113.7667       40.3667           79       175     2012      12        15        350              0.000000      -7.984497       0.000000       0.099060   -9999.000000   -9999.000000       0.033100       0.052000
53486     53486     shanxi         113.7667       40.3667           79       175     2012      12        16        351              0.044750      -6.725891       0.000000       0.107001   -9999.000000   -9999.000000       0.026700       0.072000
53486     53486     shanxi         113.7667       40.3667           79       175     2012      12        17        352              0.039875      -6.835846       0.000000       0.104018   -9999.000000       0.034200       0.031200   -9999.000000
53486     53486     shanxi         113.7667       40.3667           79       175     2012      12        18        353              0.036833     -11.890839       0.000000       0.098837   -9999.000000   -9999.000000   -9999.000000       0.117000
53486     53486     shanxi         113.7667       40.3667           79       175     2012      12        19        354              0.037167     -10.890656       0.000000       0.097343   -9999.000000   -9999.000000       0.026100       0.001000
53486     53486     shanxi         113.7667       40.3667           79       175     2012      12        20        355              0.000000      -9.404053       1.313826       0.097597   -9999.000000   -9999.000000       0.027600       0.041000
53486     53486     shanxi         113.7667       40.3667           79       175     2012      12        21        356              0.038917      -8.454224       0.000000       0.098099   -9999.000000   -9999.000000       0.026000       0.094000
53486     53486     shanxi         113.7667       40.3667           79       175     2012      12        22        357              0.036458     -10.234406       0.000000       0.098387   -9999.000000   -9999.000000       0.028400   -9999.000000
53486     53486     shanxi         113.7667       40.3667           79       175     2012      12        23        358              0.033250     -12.919067       0.000000       0.097505   -9999.000000   -9999.000000   -9999.000000       0.102000
53486     53486     shanxi         113.7667       40.3667           79       175     2012      12        24        359              0.032211     -14.781128       0.000000       0.096098   -9999.000000   -9999.000000       0.032000       0.070000
53486     53486     shanxi         113.7667       40.3667           79       175     2012      12        25        360              0.031833     -14.610291       0.000000       0.096046   -9999.000000   -9999.000000       0.027700       0.068000
53486     53486     shanxi         113.7667       40.3667           79       175     2012      12        26        361              0.000000     -14.194733       0.000000       0.095678   -9999.000000   -9999.000000       0.031400       0.049000
53486     53486     shanxi         113.7667       40.3667           79       175     2012      12        27        362              0.033000     -12.061249       0.000000       0.095887   -9999.000000   -9999.000000       0.023400       0.138000
53486     53486     shanxi         113.7667       40.3667           79       175     2012      12        28        363              0.000000     -10.060852       2.414356       0.096578   -9999.000000   -9999.000000       0.030700       0.052000
53486     53486     shanxi         113.7667       40.3667           79       175     2012      12        29        364              0.000000      -9.902283       0.000000       0.096713   -9999.000000   -9999.000000   -9999.000000       0.039000
53486     53486     shanxi         113.7667       40.3667           79       175     2012      12        30        365              0.000000      -9.607117       0.000000       0.097013   -9999.000000   -9999.000000       0.023700       0.041000
53486     53486     shanxi         113.7667       40.3667           79       175     2012      12        31        366              0.033800      -9.652191       0.000000       0.097190   -9999.000000   -9999.000000       0.027200   -9999.000000
