# Supplementary material for: Research on Fusing Multisatellite Soil Moisture Data Based on Bayesian Model Averaging
Source: Hindawi journal article supplement (doi:10.1155/2018/9310838), 2018-06-25
Supplement: f1 [file 9310838.f1.zip › 2012_sm00-10cm_daily_ZDB_ZHY_53488_366days_allin.txt]

53488     53488     shanxi         113.5833       40.0333           80       174     2012      01        01        001              0.000000   -9999.000000       0.000000   -9999.000000   -9999.000000   -9999.000000       0.030300   -9999.000000
53488     53488     shanxi         113.5833       40.0333           80       174     2012      01        02        002              0.081250      -7.431488       0.000000       0.121317   -9999.000000   -9999.000000       0.051700       0.107000
53488     53488     shanxi         113.5833       40.0333           80       174     2012      01        03        003              0.000000      -9.778625       0.000000       0.119615   -9999.000000   -9999.000000   -9999.000000       0.496000
53488     53488     shanxi         113.5833       40.0333           80       174     2012      01        04        004              0.079958     -11.628723       0.000000       0.118345   -9999.000000   -9999.000000       0.037800   -9999.000000
53488     53488     shanxi         113.5833       40.0333           80       174     2012      01        05        005              0.079958     -11.030396       2.190957       0.117851   -9999.000000   -9999.000000       0.056200       0.214000
53488     53488     shanxi         113.5833       40.0333           80       174     2012      01        06        006              0.080208      -9.710663       0.000000       0.118167   -9999.000000   -9999.000000       0.025200       0.687000
53488     53488     shanxi         113.5833       40.0333           80       174     2012      01        07        007              0.080625      -8.936646       0.000000       0.119470   -9999.000000   -9999.000000       0.037500       0.093000
53488     53488     shanxi         113.5833       40.0333           80       174     2012      01        08        008              0.000000      -7.743713       0.000000       0.120270   -9999.000000   -9999.000000       0.052100       0.464000
53488     53488     shanxi         113.5833       40.0333           80       174     2012      01        09        009              0.080292      -7.910187       0.000000       0.121915   -9999.000000   -9999.000000   -9999.000000   -9999.000000
53488     53488     shanxi         113.5833       40.0333           80       174     2012      01        10        010              0.080000      -7.706818       0.000000       0.124004   -9999.000000   -9999.000000       0.033200       0.211000
53488     53488     shanxi         113.5833       40.0333           80       174     2012      01        11        011              0.079667      -9.286865       0.000000       0.120364   -9999.000000   -9999.000000       0.062500       0.512000
53488     53488     shanxi         113.5833       40.0333           80       174     2012      01        12        012              0.080042      -9.001099       0.000000       0.119017   -9999.000000   -9999.000000       0.037900       0.183000
53488     53488     shanxi         113.5833       40.0333           80       174     2012      01        13        013              0.080125      -7.213165       0.815015       0.129388   -9999.000000   -9999.000000       0.044300       0.137000
53488     53488     shanxi         113.5833       40.0333           80       174     2012      01        14        014              0.080292      -7.000305       0.000000       0.131483   -9999.000000   -9999.000000       0.053000       0.032000
53488     53488     shanxi         113.5833       40.0333           80       174     2012      01        15        015              0.081042      -6.984650       0.000000       0.131222   -9999.000000   -9999.000000       0.051000       0.390000
53488     53488     shanxi         113.5833       40.0333           80       174     2012      01        16        016              0.080833      -6.477142       0.000000       0.136124   -9999.000000   -9999.000000       0.041600       0.509000
53488     53488     shanxi         113.5833       40.0333           80       174     2012      01        17        017              0.000000      -6.921722       0.000000       0.133272   -9999.000000   -9999.000000       0.056400       0.584000
53488     53488     shanxi         113.5833       40.0333           80       174     2012      01        18        018              0.080458      -6.486938       0.000000       0.138851   -9999.000000   -9999.000000       0.032600       0.474000
53488     53488     shanxi         113.5833       40.0333           80       174     2012      01        19        019              0.081750      -6.126099       0.000000       0.136672   -9999.000000   -9999.000000       0.053200       0.436000
53488     53488     shanxi         113.5833       40.0333           80       174     2012      01        20        020              0.080542      -6.220581       0.000000       0.137585   -9999.000000   -9999.000000   -9999.000000       0.417000
53488     53488     shanxi         113.5833       40.0333           80       174     2012      01        21        021              0.079375     -11.776794       0.000000       0.123234   -9999.000000   -9999.000000       0.028000       0.518000
53488     53488     shanxi         113.5833       40.0333           80       174     2012      01        22        022              0.078250     -13.736053       0.000000       0.119340   -9999.000000   -9999.000000       0.055200       0.606000
53488     53488     shanxi         113.5833       40.0333           80       174     2012      01        23        023              0.077833     -13.842041       0.000000       0.118318   -9999.000000   -9999.000000       0.024800   -9999.000000
53488     53488     shanxi         113.5833       40.0333           80       174     2012      01        24        024              0.077750     -12.619446       0.000000       0.118526   -9999.000000   -9999.000000   -9999.000000       0.304000
53488     53488     shanxi         113.5833       40.0333           80       174     2012      01        25        025              0.078375     -12.270447       0.000000       0.118582   -9999.000000   -9999.000000       0.047300       0.552000
53488     53488     shanxi         113.5833       40.0333           80       174     2012      01        26        026              0.078958      -9.880157       0.000000       0.119216   -9999.000000   -9999.000000       0.056700       0.596000
53488     53488     shanxi         113.5833       40.0333           80       174     2012      01        27        027              0.079667      -8.208862       0.000000       0.125802   -9999.000000   -9999.000000       0.035400       0.731000
53488     53488     shanxi         113.5833       40.0333           80       174     2012      01        28        028              0.079833      -6.617554       0.000000       0.134736   -9999.000000   -9999.000000       0.055400   -9999.000000
53488     53488     shanxi         113.5833       40.0333           80       174     2012      01        29        029              0.079625      -7.795593       0.000000       0.132811   -9999.000000   -9999.000000       0.033000       0.238000
53488     53488     shanxi         113.5833       40.0333           80       174     2012      01        30        030              0.079792      -8.310242       0.528734       0.126435   -9999.000000   -9999.000000       0.039900       0.643000
53488     53488     shanxi         113.5833       40.0333           80       174     2012      01        31        031              0.079708      -6.388275       0.000000       0.135897   -9999.000000   -9999.000000       0.049000       0.157000
53488     53488     shanxi         113.5833       40.0333           80       174     2012      02        01        032              0.078667      -9.555908       0.000000       0.123920   -9999.000000   -9999.000000       0.049100       0.558000
53488     53488     shanxi         113.5833       40.0333           80       174     2012      02        02        033              0.078458     -11.590179       0.000000       0.119648   -9999.000000   -9999.000000       0.043300   -9999.000000
53488     53488     shanxi         113.5833       40.0333           80       174     2012      02        03        034              0.079000     -10.179840       0.000000       0.119247   -9999.000000   -9999.000000       0.059400       0.462000
53488     53488     shanxi         113.5833       40.0333           80       174     2012      02        04        035              0.079583      -8.705353       3.169703       0.125756   -9999.000000   -9999.000000       0.029700       0.535000
53488     53488     shanxi         113.5833       40.0333           80       174     2012      02        05        036              0.080333      -7.737305       0.000000       0.124945   -9999.000000   -9999.000000       0.052200       0.529000
53488     53488     shanxi         113.5833       40.0333           80       174     2012      02        06        037              0.079417      -5.642029       0.000000       0.141891   -9999.000000   -9999.000000   -9999.000000       0.653000
53488     53488     shanxi         113.5833       40.0333           80       174     2012      02        07        038              0.078667     -11.783173       0.000000       0.121984   -9999.000000   -9999.000000       0.044100   -9999.000000
53488     53488     shanxi         113.5833       40.0333           80       174     2012      02        08        039              0.078750     -11.311401       0.000000       0.119354   -9999.000000   -9999.000000       0.064300       0.292000
53488     53488     shanxi         113.5833       40.0333           80       174     2012      02        09        040              0.078958      -9.421661      12.845787       0.120703   -9999.000000   -9999.000000       0.037200       0.581000
53488     53488     shanxi         113.5833       40.0333           80       174     2012      02        10        041              0.079125      -9.087494       0.000000       0.122509   -9999.000000   -9999.000000       0.042800       0.155000
53488     53488     shanxi         113.5833       40.0333           80       174     2012      02        11        042              0.080130      -7.190002       0.954611       0.132158   -9999.000000   -9999.000000       0.060800       0.165000
53488     53488     shanxi         113.5833       40.0333           80       174     2012      02        12        043              0.080292      -5.288788       0.000000       0.147400   -9999.000000   -9999.000000   -9999.000000       0.307000
53488     53488     shanxi         113.5833       40.0333           80       174     2012      02        13        044              0.082458      -5.485077       0.000000       0.141060   -9999.000000   -9999.000000   -9999.000000       0.607000
53488     53488     shanxi         113.5833       40.0333           80       174     2012      02        14        045              0.082542      -2.113098       0.000000       0.173775   -9999.000000   -9999.000000       0.070600       0.676000
53488     53488     shanxi         113.5833       40.0333           80       174     2012      02        15        046              0.081333      -4.547516       0.000000       0.159716   -9999.000000   -9999.000000       0.045300       0.694000
53488     53488     shanxi         113.5833       40.0333           80       174     2012      02        16        047              0.080042      -5.936584       0.000000       0.150245   -9999.000000   -9999.000000       0.063300       0.230000
53488     53488     shanxi         113.5833       40.0333           80       174     2012      02        17        048              0.079792      -8.302032       0.000000       0.130650   -9999.000000   -9999.000000       0.062900       0.136000
53488     53488     shanxi         113.5833       40.0333           80       174     2012      02        18        049              0.079708      -8.619263       0.000000       0.127632   -9999.000000   -9999.000000       0.057100       0.508000
53488     53488     shanxi         113.5833       40.0333           80       174     2012      02        19        050              0.080375      -7.082306       0.000000       0.138156   -9999.000000   -9999.000000       0.057400       0.604000
53488     53488     shanxi         113.5833       40.0333           80       174     2012      02        20        051              0.082375      -4.774902       0.000000       0.154293   -9999.000000   -9999.000000       0.068600       0.653000
53488     53488     shanxi         113.5833       40.0333           80       174     2012      02        21        052              0.086250      -1.633087       0.038824       0.177163   -9999.000000   -9999.000000   -9999.000000   -9999.000000
53488     53488     shanxi         113.5833       40.0333           80       174     2012      02        22        053              0.086875       1.387756       0.000000       0.197212   -9999.000000   -9999.000000       0.064300       0.463000
53488     53488     shanxi         113.5833       40.0333           80       174     2012      02        23        054              0.087417      -0.757416       0.000000       0.185524       0.058000   -9999.000000   -9999.000000       0.689000
53488     53488     shanxi         113.5833       40.0333           80       174     2012      02        24        055              0.086667      -0.185150       0.000000       0.183223   -9999.000000   -9999.000000       0.042800       0.667000
53488     53488     shanxi         113.5833       40.0333           80       174     2012      02        25        056              0.084417      -3.140472       0.000000       0.170270   -9999.000000   -9999.000000       0.069500       0.596000
53488     53488     shanxi         113.5833       40.0333           80       174     2012      02        26        057              0.086500      -4.400513       0.000000       0.151913   -9999.000000   -9999.000000       0.043400   -9999.000000
53488     53488     shanxi         113.5833       40.0333           80       174     2012      02        27        058              0.087500      -2.415863       0.000000       0.172098   -9999.000000   -9999.000000   -9999.000000       0.675000
53488     53488     shanxi         113.5833       40.0333           80       174     2012      02        28        059              0.092000      -0.842712       1.161901       0.181086       0.062000       0.014000       0.059900       0.562000
53488     53488     shanxi         113.5833       40.0333           80       174     2012      02        29        060              0.000000   -9999.000000       0.000000   -9999.000000       0.067000   -9999.000000   -9999.000000   -9999.000000
53488     53488     shanxi         113.5833       40.0333           80       174     2012      03        01        061              0.094208       1.267517       0.000000       0.195626   -9999.000000   -9999.000000       0.049500       0.705000
53488     53488     shanxi         113.5833       40.0333           80       174     2012      03        02        062              0.094292       0.170502       0.000000       0.189061   -9999.000000       0.006600       0.067200   -9999.000000
53488     53488     shanxi         113.5833       40.0333           80       174     2012      03        03        063              0.096708       0.576538       0.000000       0.195621   -9999.000000   -9999.000000       0.045200       0.528000
53488     53488     shanxi         113.5833       40.0333           80       174     2012      03        04        064              0.098625       0.259979       0.000000       0.191210   -9999.000000   -9999.000000       0.057400       0.545000
53488     53488     shanxi         113.5833       40.0333           80       174     2012      03        05        065              0.091458       0.910645       0.000000       0.195869   -9999.000000   -9999.000000       0.063600       0.484000
53488     53488     shanxi         113.5833       40.0333           80       174     2012      03        06        066              0.089208      -2.401611       0.000000       0.173782       0.080000   -9999.000000       0.051700       0.617000
53488     53488     shanxi         113.5833       40.0333           80       174     2012      03        07        067              0.000000      -0.848083       0.000000       0.180041       0.072000       0.044600       0.054400   -9999.000000
53488     53488     shanxi         113.5833       40.0333           80       174     2012      03        08        068              0.091875      -1.493713       0.000000       0.177640   -9999.000000   -9999.000000       0.066300       0.412000
53488     53488     shanxi         113.5833       40.0333           80       174     2012      03        09        069              0.101250      -2.483521       0.000000       0.169023   -9999.000000   -9999.000000       0.044200       0.571000
53488     53488     shanxi         113.5833       40.0333           80       174     2012      03        10        070              0.097208       0.812836       0.000000       0.191473   -9999.000000       0.055700       0.059400       0.263000
53488     53488     shanxi         113.5833       40.0333           80       174     2012      03        11        071              0.089542      -3.534790       0.000000       0.167780       0.064000   -9999.000000   -9999.000000       0.612000
53488     53488     shanxi         113.5833       40.0333           80       174     2012      03        12        072              0.092917      -2.749634       0.202086       0.165394       0.070000       0.028100       0.043200       0.595000
53488     53488     shanxi         113.5833       40.0333           80       174     2012      03        13        073              0.102500       0.362091       0.168128       0.184393   -9999.000000   -9999.000000       0.066100       0.651000
53488     53488     shanxi         113.5833       40.0333           80       174     2012      03        14        074              0.115261       2.573517       0.000000       0.198105   -9999.000000   -9999.000000   -9999.000000       0.748000
53488     53488     shanxi         113.5833       40.0333           80       174     2012      03        15        075              0.124375       3.689270       0.000000       0.199306   -9999.000000       0.048400       0.059400       0.729000
53488     53488     shanxi         113.5833       40.0333           80       174     2012      03        16        076              0.127542       3.706940       0.000000       0.215134       0.072000   -9999.000000       0.065300       0.174000
53488     53488     shanxi         113.5833       40.0333           80       174     2012      03        17        077              0.129500       6.214417       0.000000       0.212185       0.065000       0.029300       0.060400       0.371000
53488     53488     shanxi         113.5833       40.0333           80       174     2012      03        18        078              0.131250       4.430573       0.000000       0.202244       0.066000   -9999.000000       0.043100       0.555000
53488     53488     shanxi         113.5833       40.0333           80       174     2012      03        19        079              0.132542       3.067841       0.000000       0.198738   -9999.000000   -9999.000000       0.072400       0.718000
53488     53488     shanxi         113.5833       40.0333           80       174     2012      03        20        080              0.130917       4.691437       0.129236       0.204526       0.060000       0.036700       0.056300       0.397000
53488     53488     shanxi         113.5833       40.0333           80       174     2012      03        21        081              0.131667       5.707489       0.044762       0.208630   -9999.000000   -9999.000000       0.094600   -9999.000000
53488     53488     shanxi         113.5833       40.0333           80       174     2012      03        22        082              0.133167       3.327240       0.000000       0.212540       0.087000   -9999.000000       0.095000       0.752000
53488     53488     shanxi         113.5833       40.0333           80       174     2012      03        23        083              0.128625       4.950043       0.783714       0.217382       0.075000   -9999.000000       0.054200       0.623000
53488     53488     shanxi         113.5833       40.0333           80       174     2012      03        24        084              0.128125       3.197723       0.000000       0.204180   -9999.000000   -9999.000000   -9999.000000       0.497000
53488     53488     shanxi         113.5833       40.0333           80       174     2012      03        25        085              0.000000       5.705200       0.000000       0.205650   -9999.000000   -9999.000000       0.072800       0.656000
53488     53488     shanxi         113.5833       40.0333           80       174     2012      03        26        086              0.135875       7.529388       1.325917       0.206470       0.061000   -9999.000000       0.054500   -9999.000000
53488     53488     shanxi         113.5833       40.0333           80       174     2012      03        27        087              0.136500       9.438507       0.000000       0.206265       0.067000   -9999.000000       0.063300       0.339000
53488     53488     shanxi         113.5833       40.0333           80       174     2012      03        28        088              0.136292      10.250458       0.000000       0.200345       0.069000       0.021100   -9999.000000       0.867000
53488     53488     shanxi         113.5833       40.0333           80       174     2012      03        29        089              0.135083      12.117950       0.000000       0.198169   -9999.000000       0.080200       0.038600       0.492000
53488     53488     shanxi         113.5833       40.0333           80       174     2012      03        30        090              0.133875       9.079102       0.000000       0.190198   -9999.000000       0.038400       0.068900       0.580000
53488     53488     shanxi         113.5833       40.0333           80       174     2012      03        31        091              0.134875       4.954346       0.000000       0.190677       0.054000   -9999.000000       0.053200   -9999.000000
53488     53488     shanxi         113.5833       40.0333           80       174     2012      04        01        092              0.134458       8.678589       0.000000       0.191597       0.064000   -9999.000000       0.054500       0.604000
53488     53488     shanxi         113.5833       40.0333           80       174     2012      04        02        093              0.130417       9.469574       0.000000       0.189534       0.066000       0.031100       0.071300       0.517000
53488     53488     shanxi         113.5833       40.0333           80       174     2012      04        03        094              0.131000       4.516815       0.000000       0.180561       0.060000       0.049900       0.067500       0.484000
53488     53488     shanxi         113.5833       40.0333           80       174     2012      04        04        095              0.132417       7.505249       0.000000       0.186891   -9999.000000       0.108600       0.051400       0.427000
53488     53488     shanxi         113.5833       40.0333           80       174     2012      04        05        096              0.132333       8.993317       0.000000       0.183686       0.059000   -9999.000000       0.078000   -9999.000000
53488     53488     shanxi         113.5833       40.0333           80       174     2012      04        06        097              0.132333       9.171783       0.759777       0.181359       0.068000   -9999.000000       0.053100       0.583000
53488     53488     shanxi         113.5833       40.0333           80       174     2012      04        07        098              0.131292      11.658661       0.000000       0.179016       0.063000       0.015200       0.071900       0.825000
53488     53488     shanxi         113.5833       40.0333           80       174     2012      04        08        099              0.130500      14.041138       0.000000       0.174582       0.062000   -9999.000000       0.068000       0.437000
53488     53488     shanxi         113.5833       40.0333           80       174     2012      04        09        100              0.130000      14.062012       0.000000       0.170532       0.069000   -9999.000000       0.058500       0.738000
53488     53488     shanxi         113.5833       40.0333           80       174     2012      04        10        101              0.128000      16.327393       0.262616       0.169060   -9999.000000   -9999.000000       0.084500       0.422000
53488     53488     shanxi         113.5833       40.0333           80       174     2012      04        11        102              0.126833      12.643280       0.308129       0.171809       0.058000       0.098200       0.040200       0.649000
53488     53488     shanxi         113.5833       40.0333           80       174     2012      04        12        103              0.127833       8.606506       0.000000       0.173802       0.063000   -9999.000000       0.062200       0.664000
53488     53488     shanxi         113.5833       40.0333           80       174     2012      04        13        104              0.128000      12.472137       0.000000       0.172441       0.060000   -9999.000000       0.071800       0.492000
53488     53488     shanxi         113.5833       40.0333           80       174     2012      04        14        105              0.127417      14.698120       0.000000       0.168685   -9999.000000   -9999.000000       0.078900       0.325000
53488     53488     shanxi         113.5833       40.0333           80       174     2012      04        15        106              0.125792      16.689453       0.000000       0.164897   -9999.000000       0.015900       0.045800       0.428000
53488     53488     shanxi         113.5833       40.0333           80       174     2012      04        16        107              0.125250      14.325958       0.000000       0.163265       0.050000   -9999.000000       0.083500       0.637000
53488     53488     shanxi         113.5833       40.0333           80       174     2012      04        17        108              0.124750      15.068237       0.000000       0.162509       0.061000   -9999.000000       0.060500       0.625000
53488     53488     shanxi         113.5833       40.0333           80       174     2012      04        18        109              0.122750      18.429504       2.889817       0.161044       0.075000   -9999.000000   -9999.000000       0.837000
53488     53488     shanxi         113.5833       40.0333           80       174     2012      04        19        110              0.123000      14.653595       0.000000       0.199676   -9999.000000   -9999.000000       0.073600   -9999.000000
53488     53488     shanxi         113.5833       40.0333           80       174     2012      04        20        111              0.122500      15.508636       0.278966       0.192384       0.086000   -9999.000000       0.094300       0.450000
53488     53488     shanxi         113.5833       40.0333           80       174     2012      04        21        112              0.122917      16.007629       0.000000       0.181628       0.056000   -9999.000000       0.062400       0.728000
53488     53488     shanxi         113.5833       40.0333           80       174     2012      04        22        113              0.123333      17.835022       0.000000       0.173667       0.058000       0.117000       0.086200       0.662000
53488     53488     shanxi         113.5833       40.0333           80       174     2012      04        23        114              0.124667      21.173706      20.275196       0.165587       0.064000   -9999.000000       0.063100       0.732000
53488     53488     shanxi         113.5833       40.0333           80       174     2012      04        24        115              0.152250      21.245056      10.188819       0.219961       0.128000       0.198500       0.127800   -9999.000000
53488     53488     shanxi         113.5833       40.0333           80       174     2012      04        25        116              0.000000      10.614594       0.000000       0.321549   -9999.000000       0.128700   -9999.000000       0.639000
53488     53488     shanxi         113.5833       40.0333           80       174     2012      04        26        117              0.147625      10.456543       0.000000       0.285612       0.067000   -9999.000000       0.060000       0.754000
53488     53488     shanxi         113.5833       40.0333           80       174     2012      04        27        118              0.144375      14.958496       0.000000       0.268052       0.060000   -9999.000000   -9999.000000       0.581000
53488     53488     shanxi         113.5833       40.0333           80       174     2012      04        28        119              0.142625      13.329315       0.000000       0.253560       0.058000   -9999.000000       0.057600       0.585000
53488     53488     shanxi         113.5833       40.0333           80       174     2012      04        29        120              0.141542      16.174500       0.000000       0.242827       0.064500   -9999.000000       0.071600   -9999.000000
53488     53488     shanxi         113.5833       40.0333           80       174     2012      04        30        121              0.138833      19.565552       2.075000       0.230741       0.070000       0.101500       0.086000       0.532000
53488     53488     shanxi         113.5833       40.0333           80       174     2012      05        01        122              0.137333      17.858337       1.294685       0.243895       0.076000   -9999.000000       0.090100       0.769000
53488     53488     shanxi         113.5833       40.0333           80       174     2012      05        02        123              0.135667      19.792175       0.000000       0.232484       0.061000   -9999.000000       0.053700       0.522000
53488     53488     shanxi         113.5833       40.0333           80       174     2012      05        03        124              0.133875      20.705566       0.746485       0.215154       0.056000       0.145200       0.083300       0.670000
53488     53488     shanxi         113.5833       40.0333           80       174     2012      05        04        125              0.131750      22.018494       0.000000       0.199852       0.058000   -9999.000000       0.058600   -9999.000000
53488     53488     shanxi         113.5833       40.0333           80       174     2012      05        05        126              0.129125      23.467499       0.000000       0.187378       0.061000   -9999.000000       0.064700       0.531000
53488     53488     shanxi         113.5833       40.0333           80       174     2012      05        06        127              0.126625      23.037079       0.000000       0.178854       0.062000   -9999.000000       0.070200       0.496000
53488     53488     shanxi         113.5833       40.0333           80       174     2012      05        07        128              0.123875      25.176727       0.161538       0.173221   -9999.000000   -9999.000000       0.081300       0.383000
53488     53488     shanxi         113.5833       40.0333           80       174     2012      05        08        129              0.121833      25.242310       0.000000       0.172262       0.053000       0.093400       0.071500       0.815000
53488     53488     shanxi         113.5833       40.0333           80       174     2012      05        09        130              0.120125      25.268127       0.467397       0.169032       0.092000       0.161400       0.102400       0.556000
53488     53488     shanxi         113.5833       40.0333           80       174     2012      05        10        131              0.122478      21.650726       5.264633       0.178068   -9999.000000   -9999.000000       0.077500       0.703000
53488     53488     shanxi         113.5833       40.0333           80       174     2012      05        11        132              0.151292      25.240784       9.372938       0.191735   -9999.000000   -9999.000000       0.178700       1.000000
53488     53488     shanxi         113.5833       40.0333           80       174     2012      05        12        133              0.184958      17.289032       0.000000       0.288205       0.092000       0.138500   -9999.000000       0.892000
53488     53488     shanxi         113.5833       40.0333           80       174     2012      05        13        134              0.172167      16.752319       0.000000       0.262656       0.075000       0.270500       0.090900       0.403000
53488     53488     shanxi         113.5833       40.0333           80       174     2012      05        14        135              0.162500      16.403473       0.147229       0.239599       0.066000   -9999.000000       0.105300       0.557000
53488     53488     shanxi         113.5833       40.0333           80       174     2012      05        15        136              0.157208      15.417114       0.218574       0.226054       0.069500       0.198900       0.069900       0.590000
53488     53488     shanxi         113.5833       40.0333           80       174     2012      05        16        137              0.152833      16.820648       0.000000       0.215860       0.081000   -9999.000000       0.075300       0.755000
53488     53488     shanxi         113.5833       40.0333           80       174     2012      05        17        138              0.151375      18.129333       0.000000       0.204158       0.065500   -9999.000000       0.082100       0.693000
53488     53488     shanxi         113.5833       40.0333           80       174     2012      05        18        139              0.148167      22.792145       0.440280       0.190007       0.069500       0.059500       0.097300   -9999.000000
53488     53488     shanxi         113.5833       40.0333           80       174     2012      05        19        140              0.145750      23.516693       0.078716       0.184641       0.065000   -9999.000000       0.089500       0.266000
53488     53488     shanxi         113.5833       40.0333           80       174     2012      05        20        141              0.142375      24.030151       1.952079       0.179647       0.079000   -9999.000000       0.105900       0.475000
53488     53488     shanxi         113.5833       40.0333           80       174     2012      05        21        142              0.144333      22.215363       2.866849       0.203378       0.173000       0.119200       0.130300       0.498000
53488     53488     shanxi         113.5833       40.0333           80       174     2012      05        22        143              0.154333      18.535217       0.000000       0.221399       0.095000   -9999.000000       0.092600       0.702000
53488     53488     shanxi         113.5833       40.0333           80       174     2012      05        23        144              0.153708      19.369476       0.000000       0.212908   -9999.000000       0.150400       0.083600   -9999.000000
53488     53488     shanxi         113.5833       40.0333           80       174     2012      05        24        145              0.150875      19.710785       0.000000       0.193680       0.072000   -9999.000000       0.082600       0.542000
53488     53488     shanxi         113.5833       40.0333           80       174     2012      05        25        146              0.000000      21.003265       0.235274       0.181150       0.082000       0.083200       0.082700       0.814000
53488     53488     shanxi         113.5833       40.0333           80       174     2012      05        26        147              0.146583      19.977966       0.000000       0.176064       0.079000       0.160200       0.095900       0.475000
53488     53488     shanxi         113.5833       40.0333           80       174     2012      05        27        148              0.145083      24.320343       0.000000       0.169048       0.078000   -9999.000000       0.066800       0.565000
53488     53488     shanxi         113.5833       40.0333           80       174     2012      05        28        149              0.142167      26.233368       2.869464       0.164101       0.072500   -9999.000000       0.080700   -9999.000000
53488     53488     shanxi         113.5833       40.0333           80       174     2012      05        29        150              0.142583      27.006531       1.158168       0.168420       0.121000   -9999.000000   -9999.000000       0.850000
53488     53488     shanxi         113.5833       40.0333           80       174     2012      05        30        151              0.145042      18.649323       0.000000       0.214534       0.077000   -9999.000000       0.075600   -9999.000000
53488     53488     shanxi         113.5833       40.0333           80       174     2012      05        31        152              0.183458      20.395447      18.011814       0.190754   -9999.000000       0.121400   -9999.000000   -9999.000000
53488     53488     shanxi         113.5833       40.0333           80       174     2012      06        01        153              0.195333      15.038513       0.153932       0.295471   -9999.000000   -9999.000000       0.118600       0.872000
53488     53488     shanxi         113.5833       40.0333           80       174     2012      06        02        154              0.185458      19.320923       0.512958       0.271838       0.101000       0.158400       0.083300   -9999.000000
53488     53488     shanxi         113.5833       40.0333           80       174     2012      06        03        155              0.182917      22.142059       1.190830       0.248577       0.128000       0.077400       0.111600       0.583000
53488     53488     shanxi         113.5833       40.0333           80       174     2012      06        04        156              0.181458      20.444000       0.000000       0.248269       0.085000   -9999.000000       0.186700       0.777000
53488     53488     shanxi         113.5833       40.0333           80       174     2012      06        05        157              0.175625      23.813873       0.000000       0.225257       0.086500       0.093400       0.139600       0.670000
53488     53488     shanxi         113.5833       40.0333           80       174     2012      06        06        158              0.163958      25.755554       1.157447       0.207531       0.107000   -9999.000000       0.207200       0.778000
53488     53488     shanxi         113.5833       40.0333           80       174     2012      06        07        159              0.209125      20.976410       1.748264       0.209550       0.087000   -9999.000000       0.141900       0.447000
53488     53488     shanxi         113.5833       40.0333           80       174     2012      06        08        160              0.207000      22.540314       0.130894       0.217360       0.083500       0.074800       0.153100       0.662000
53488     53488     shanxi         113.5833       40.0333           80       174     2012      06        09        161              0.189125      24.332336       0.971412       0.203458       0.079000   -9999.000000       0.156100       0.933000
53488     53488     shanxi         113.5833       40.0333           80       174     2012      06        10        162              0.180333      22.394836       0.000000       0.197839       0.065000       0.278300       0.140700       0.918000
53488     53488     shanxi         113.5833       40.0333           80       174     2012      06        11        163              0.000000      20.939728       0.000000       0.190598       0.086000   -9999.000000       0.155900       0.685000
53488     53488     shanxi         113.5833       40.0333           80       174     2012      06        12        164              0.168167      22.904053       0.000000       0.177827       0.095000   -9999.000000       0.149600       0.416000
53488     53488     shanxi         113.5833       40.0333           80       174     2012      06        13        165              0.162250      23.401947       0.482383       0.172459       0.082500       0.031400       0.116000       0.807000
53488     53488     shanxi         113.5833       40.0333           80       174     2012      06        14        166              0.154333      21.778290       0.323532       0.174189       0.088000   -9999.000000       0.146600       0.772000
53488     53488     shanxi         113.5833       40.0333           80       174     2012      06        15        167              0.154417      18.180939       0.000000       0.178502       0.088000       0.046000   -9999.000000       0.808000
53488     53488     shanxi         113.5833       40.0333           80       174     2012      06        16        168              0.156083      21.678192       6.397182       0.173563       0.092000   -9999.000000       0.102300   -9999.000000
53488     53488     shanxi         113.5833       40.0333           80       174     2012      06        17        169              0.155333      26.152313       0.000000       0.165666       0.092000   -9999.000000       0.146800       0.411000
53488     53488     shanxi         113.5833       40.0333           80       174     2012      06        18        170              0.152333      29.228760       0.102744       0.161387       0.085000       0.065400       0.098000       0.910000
53488     53488     shanxi         113.5833       40.0333           80       174     2012      06        19        171              0.146542      29.904968       2.611932       0.160252   -9999.000000   -9999.000000       0.146100       0.715000
53488     53488     shanxi         113.5833       40.0333           80       174     2012      06        20        172              0.145625      25.594238       0.482824       0.187917       0.108000       0.139400       0.123800       0.862000
53488     53488     shanxi         113.5833       40.0333           80       174     2012      06        21        173              0.146667      24.786713       0.225452       0.191878       0.117000   -9999.000000       0.154700   -9999.000000
53488     53488     shanxi         113.5833       40.0333           80       174     2012      06        22        174              0.148042      25.736633       8.484908       0.177394       0.140000   -9999.000000       0.148200       0.520000
53488     53488     shanxi         113.5833       40.0333           80       174     2012      06        23        175              0.158833      25.657623       7.376681       0.240359       0.128500       0.162500       0.206100       1.000000
53488     53488     shanxi         113.5833       40.0333           80       174     2012      06        24        176              0.181417      26.597412       0.998357       0.258443       0.147000   -9999.000000       0.139900       1.000000
53488     53488     shanxi         113.5833       40.0333           80       174     2012      06        25        177              0.180000      24.232758       8.957092       0.264010       0.112000   -9999.000000       0.140000       0.992000
53488     53488     shanxi         113.5833       40.0333           80       174     2012      06        26        178              0.220250      26.099304       6.493586       0.294821       0.133000       0.103400       0.204300   -9999.000000
53488     53488     shanxi         113.5833       40.0333           80       174     2012      06        27        179              0.223667      23.399170       8.209711       0.299559       0.167000   -9999.000000       0.207500       0.720000
53488     53488     shanxi         113.5833       40.0333           80       174     2012      06        28        180              0.239500      21.739655       4.756883       0.294320       0.184000       0.275800       0.225200       1.000000
53488     53488     shanxi         113.5833       40.0333           80       174     2012      06        29        181              0.219708      19.610535       0.375200       0.314256       0.147000       0.228900       0.140700       1.000000
53488     53488     shanxi         113.5833       40.0333           80       174     2012      06        30        182              0.206125      23.335815       0.000000       0.286967       0.097000       0.091100       0.126500   -9999.000000
53488     53488     shanxi         113.5833       40.0333           80       174     2012      07        01        183              0.195583      25.897919       0.000000       0.263020       0.095000       0.086500       0.138700   -9999.000000
53488     53488     shanxi         113.5833       40.0333           80       174     2012      07        02        184              0.187417      26.743530       0.000000       0.242348       0.121000   -9999.000000   -9999.000000       0.714000
53488     53488     shanxi         113.5833       40.0333           80       174     2012      07        03        185              0.180542      26.879944       0.000000       0.224524       0.134000       0.051100       0.120800       0.838000
53488     53488     shanxi         113.5833       40.0333           80       174     2012      07        04        186              0.172750      28.048889       0.377585       0.210235       0.102000   -9999.000000       0.167700       0.630000
53488     53488     shanxi         113.5833       40.0333           80       174     2012      07        05        187              0.169292      27.831818       5.472533       0.201588       0.101000   -9999.000000       0.126200       1.000000
53488     53488     shanxi         113.5833       40.0333           80       174     2012      07        06        188              0.175708      28.549530       0.459484       0.229709   -9999.000000       0.152600       0.140300       0.808000
53488     53488     shanxi         113.5833       40.0333           80       174     2012      07        07        189              0.176167      28.999146       0.571100       0.229279   -9999.000000       0.253700       0.158600       0.893000
53488     53488     shanxi         113.5833       40.0333           80       174     2012      07        08        190              0.192333      26.860229      11.581915       0.218674       0.184000       0.115900       0.220400       1.000000
53488     53488     shanxi         113.5833       40.0333           80       174     2012      07        09        191              0.202500      26.555420       0.633097       0.273986       0.138000       0.144900       0.133100       1.000000
53488     53488     shanxi         113.5833       40.0333           80       174     2012      07        10        192              0.210542      26.926422      10.550379       0.271596       0.135500   -9999.000000       0.184100       0.834000
53488     53488     shanxi         113.5833       40.0333           80       174     2012      07        11        193              0.214708      25.369141       2.135746       0.307316       0.111000       0.256800       0.115800       0.871000
53488     53488     shanxi         113.5833       40.0333           80       174     2012      07        12        194              0.205625      26.001160       0.265179       0.280298       0.144000       0.324200       0.149600       0.926000
53488     53488     shanxi         113.5833       40.0333           80       174     2012      07        13        195              0.190458      24.910889       0.697809       0.264668       0.152000   -9999.000000   -9999.000000       0.706000
53488     53488     shanxi         113.5833       40.0333           80       174     2012      07        14        196              0.177208      25.722137       7.886901       0.250809       0.169000       0.010700       0.129500       0.950000
53488     53488     shanxi         113.5833       40.0333           80       174     2012      07        15        197              0.169458      23.209747       0.000000       0.291191       0.122500       0.235300       0.145900   -9999.000000
53488     53488     shanxi         113.5833       40.0333           80       174     2012      07        16        198              0.156667      25.572998       0.000000       0.259529       0.092000       0.113900       0.125700       0.515000
53488     53488     shanxi         113.5833       40.0333           80       174     2012      07        17        199              0.144500      26.592743       0.000000       0.239073       0.107000   -9999.000000       0.143000       0.945000
53488     53488     shanxi         113.5833       40.0333           80       174     2012      07        18        200              0.136292      27.087189       0.062289       0.222187       0.129000   -9999.000000       0.160200       0.929000
53488     53488     shanxi         113.5833       40.0333           80       174     2012      07        19        201              0.128042      27.506134       0.167266       0.210242       0.136000       0.027700       0.184200       0.594000
53488     53488     shanxi         113.5833       40.0333           80       174     2012      07        20        202              0.121652      28.352966       0.566934       0.199076       0.114000   -9999.000000       0.147500   -9999.000000
53488     53488     shanxi         113.5833       40.0333           80       174     2012      07        21        203              0.244739      29.705536      33.951675       0.191553   -9999.000000       0.066000       0.277500       1.000000
53488     53488     shanxi         113.5833       40.0333           80       174     2012      07        22        204              0.216542      20.797729       0.282728       0.352792       0.215000   -9999.000000       0.233200       1.000000
53488     53488     shanxi         113.5833       40.0333           80       174     2012      07        23        205              0.198958      23.699677       0.000000       0.299183       0.167500   -9999.000000       0.142400       0.977000
53488     53488     shanxi         113.5833       40.0333           80       174     2012      07        24        206              0.188875      24.321747       1.112162       0.281905       0.185000       0.143100       0.131900       0.725000
53488     53488     shanxi         113.5833       40.0333           80       174     2012      07        25        207              0.185583      27.062592       3.551852       0.269835       0.218000   -9999.000000       0.157100   -9999.000000
53488     53488     shanxi         113.5833       40.0333           80       174     2012      07        26        208              0.210417      24.212677       4.020525       0.289492       0.219500       0.183900       0.161800       1.000000
53488     53488     shanxi         113.5833       40.0333           80       174     2012      07        27        209              0.197458      26.189117       3.627570       0.291694       0.195000       0.067800       0.165500       1.000000
53488     53488     shanxi         113.5833       40.0333           80       174     2012      07        28        210              0.232875      26.412781       3.450874       0.281519       0.188000   -9999.000000       0.149700       1.000000
53488     53488     shanxi         113.5833       40.0333           80       174     2012      07        29        211              0.205042      25.105133       0.176263       0.297227       0.178000       0.155400       0.133300       0.867000
53488     53488     shanxi         113.5833       40.0333           80       174     2012      07        30        212              0.249625      26.220734      30.481071       0.270569   -9999.000000   -9999.000000   -9999.000000   -9999.000000
53488     53488     shanxi         113.5833       40.0333           80       174     2012      07        31        213              0.246083      21.124084       0.602304       0.330932       0.228000   -9999.000000       0.140000       1.000000
53488     53488     shanxi         113.5833       40.0333           80       174     2012      08        01        214              0.220750      20.861786       0.265291       0.334640       0.233000       0.256000       0.175600       1.000000
53488     53488     shanxi         113.5833       40.0333           80       174     2012      08        02        215              0.206250      22.819061       0.287066       0.313887       0.216000       0.183900       0.138700       0.962000
53488     53488     shanxi         113.5833       40.0333           80       174     2012      08        03        216              0.191292      25.405914       0.151704       0.300674       0.211000       0.259600       0.129800       0.924000
53488     53488     shanxi         113.5833       40.0333           80       174     2012      08        04        217              0.176625      26.540405       0.000000       0.287827       0.203000   -9999.000000       0.137300       0.731000
53488     53488     shanxi         113.5833       40.0333           80       174     2012      08        05        218              0.162000      27.457245       0.000000       0.275533       0.158000   -9999.000000       0.145500       0.885000
53488     53488     shanxi         113.5833       40.0333           80       174     2012      08        06        219              0.150500      27.023682       1.681702       0.265931       0.172500       0.183300       0.115400       0.837000
53488     53488     shanxi         113.5833       40.0333           80       174     2012      08        07        220              0.158625      27.050903      31.625198       0.265486       0.163000   -9999.000000   -9999.000000       1.000000
53488     53488     shanxi         113.5833       40.0333           80       174     2012      08        08        221              0.175542      25.905975      11.254189       0.348307       0.172000       0.399800       0.129200       1.000000
53488     53488     shanxi         113.5833       40.0333           80       174     2012      08        09        222              0.174833      23.804108       0.839667       0.322174       0.173000   -9999.000000       0.133000       0.811000
53488     53488     shanxi         113.5833       40.0333           80       174     2012      08        10        223              0.168917      25.229980       0.374240       0.305179       0.155000   -9999.000000       0.123300       0.991000
53488     53488     shanxi         113.5833       40.0333           80       174     2012      08        11        224              0.200583      24.840546      15.560608       0.292858       0.231500       0.207300       0.146700       1.000000
53488     53488     shanxi         113.5833       40.0333           80       174     2012      08        12        225              0.213500      19.431274       0.000000       0.333123       0.176000   -9999.000000       0.133400       1.000000
53488     53488     shanxi         113.5833       40.0333           80       174     2012      08        13        226              0.196625      22.877533       0.885650       0.314955       0.154000       0.231900       0.121300   -9999.000000
53488     53488     shanxi         113.5833       40.0333           80       174     2012      08        14        227              0.220917      23.345490       7.874330       0.301669       0.228000   -9999.000000       0.116000       1.000000
53488     53488     shanxi         113.5833       40.0333           80       174     2012      08        15        228              0.214708      20.927338       0.000000       0.325406       0.212000       0.137200       0.117800       1.000000
53488     53488     shanxi         113.5833       40.0333           80       174     2012      08        16        229              0.199458      21.801086       0.044256       0.305996       0.157000       0.209600   -9999.000000       0.859000
53488     53488     shanxi         113.5833       40.0333           80       174     2012      08        17        230              0.187750      23.415985       0.620638       0.295197       0.149000   -9999.000000       0.087500       0.849000
53488     53488     shanxi         113.5833       40.0333           80       174     2012      08        18        231              0.179333      22.908691       0.086411       0.294288       0.170000   -9999.000000       0.124300   -9999.000000
53488     53488     shanxi         113.5833       40.0333           80       174     2012      08        19        232              0.174125      21.089813       0.137571       0.290079       0.152500       0.186300       0.085300       0.617000
53488     53488     shanxi         113.5833       40.0333           80       174     2012      08        20        233              0.164333      24.067291       0.303614       0.278840       0.164000       0.046100       0.121000       0.966000
53488     53488     shanxi         113.5833       40.0333           80       174     2012      08        21        234              0.154875      21.143585       0.000000       0.273128       0.144500       0.038000       0.129200       0.690000
53488     53488     shanxi         113.5833       40.0333           80       174     2012      08        22        235              0.148500      18.859375       0.000000       0.263362       0.143500       0.091100       0.132800   -9999.000000
53488     53488     shanxi         113.5833       40.0333           80       174     2012      08        23        236              0.142667      20.333221       0.000000       0.256654       0.129000   -9999.000000       0.115500   -9999.000000
53488     53488     shanxi         113.5833       40.0333           80       174     2012      08        24        237              0.137042      21.943329       0.000000       0.250235       0.116000       0.107500       0.152000       0.577000
53488     53488     shanxi         113.5833       40.0333           80       174     2012      08        25        238              0.000000      22.850006       0.486297       0.243099       0.163000   -9999.000000       0.123000       0.927000
53488     53488     shanxi         113.5833       40.0333           80       174     2012      08        26        239              0.126833      24.431458       1.711493       0.240210       0.182000       0.124000       0.137200       0.881000
53488     53488     shanxi         113.5833       40.0333           80       174     2012      08        27        240              0.122250      24.858185       2.299772       0.233865       0.165000   -9999.000000       0.139400       0.739000
53488     53488     shanxi         113.5833       40.0333           80       174     2012      08        28        241              0.119167      22.466766       0.330065       0.231783       0.146000       0.119100       0.104000   -9999.000000
53488     53488     shanxi         113.5833       40.0333           80       174     2012      08        29        242              0.117667      23.997070       0.000000       0.222103       0.137000       0.154500       0.146900       0.580000
53488     53488     shanxi         113.5833       40.0333           80       174     2012      08        30        243              0.115375      25.075378       1.964061       0.212207       0.169000   -9999.000000       0.141900       0.964000
53488     53488     shanxi         113.5833       40.0333           80       174     2012      08        31        244              0.112250      25.497040       0.301010       0.205262       0.170000       0.058000       0.122200       0.741000
53488     53488     shanxi         113.5833       40.0333           80       174     2012      09        01        245              0.214500      23.524109      55.253536       0.208266       0.225000       0.106400       0.176000       1.000000
53488     53488     shanxi         113.5833       40.0333           80       174     2012      09        02        246              0.231542      17.546600       0.000000       0.350240       0.230000   -9999.000000   -9999.000000       1.000000
53488     53488     shanxi         113.5833       40.0333           80       174     2012      09        03        247              0.212708      17.251648       0.000000       0.334119       0.196000       0.190200       0.128600       0.967000
53488     53488     shanxi         113.5833       40.0333           80       174     2012      09        04        248              0.202083      14.937073       0.000000       0.316203       0.133000       0.243400       0.163800       0.984000
53488     53488     shanxi         113.5833       40.0333           80       174     2012      09        05        249              0.194667      16.599396       0.000000       0.305858       0.181000   -9999.000000       0.124000       0.890000
53488     53488     shanxi         113.5833       40.0333           80       174     2012      09        06        250              0.189875      18.734161       0.150394       0.297677       0.172000       0.269400       0.135000       0.936000
53488     53488     shanxi         113.5833       40.0333           80       174     2012      09        07        251              0.186542      19.458435       0.547354       0.293566       0.148500       0.178900       0.141600       0.684000
53488     53488     shanxi         113.5833       40.0333           80       174     2012      09        08        252              0.182042      19.517029       0.000000       0.287221       0.134000       0.099500       0.135600       0.792000
53488     53488     shanxi         113.5833       40.0333           80       174     2012      09        09        253              0.177125      20.339935       0.390505       0.280179       0.133000   -9999.000000       0.110500       0.953000
53488     53488     shanxi         113.5833       40.0333           80       174     2012      09        10        254              0.173458      21.464752       0.112242       0.272905       0.170000   -9999.000000       0.122600       0.759000
53488     53488     shanxi         113.5833       40.0333           80       174     2012      09        11        255              0.171542      19.280579       0.110455       0.273487       0.134000       0.052400       0.094100   -9999.000000
53488     53488     shanxi         113.5833       40.0333           80       174     2012      09        12        256              0.166167      17.406250       0.280602       0.270035       0.111500   -9999.000000       0.111700       0.588000
53488     53488     shanxi         113.5833       40.0333           80       174     2012      09        13        257              0.164042      13.854492       0.649964       0.266850       0.130000       0.071500       0.130500       0.997000
53488     53488     shanxi         113.5833       40.0333           80       174     2012      09        14        258              0.164958      13.411438       0.000000       0.269717       0.115000   -9999.000000       0.084100       1.000000
53488     53488     shanxi         113.5833       40.0333           80       174     2012      09        15        259              0.164583      15.047638       0.000000       0.264502       0.141000       0.116000       0.124300       0.870000
53488     53488     shanxi         113.5833       40.0333           80       174     2012      09        16        260              0.162750      16.312073       0.000000       0.259105       0.142000       0.151900       0.079700   -9999.000000
53488     53488     shanxi         113.5833       40.0333           80       174     2012      09        17        261              0.159208      17.268219       0.000000       0.255212       0.121500   -9999.000000       0.087800       0.946000
53488     53488     shanxi         113.5833       40.0333           80       174     2012      09        18        262              0.158958      16.827667       1.646005       0.253688       0.119000       0.093700       0.097200       0.924000
53488     53488     shanxi         113.5833       40.0333           80       174     2012      09        19        263              0.156958      17.630493       0.137722       0.251244       0.117000   -9999.000000       0.104400       0.951000
53488     53488     shanxi         113.5833       40.0333           80       174     2012      09        20        264              0.155542      17.669281       2.054554       0.258282       0.107000       0.196400       0.084100       0.798000
53488     53488     shanxi         113.5833       40.0333           80       174     2012      09        21        265              0.152167      18.730652       0.227912       0.256618   -9999.000000       0.135800       0.116500   -9999.000000
53488     53488     shanxi         113.5833       40.0333           80       174     2012      09        22        266              0.153917      16.023651       0.034493       0.267539       0.123000       0.317600       0.087400       0.634000
53488     53488     shanxi         113.5833       40.0333           80       174     2012      09        23        267              0.152875      18.255432       2.962984       0.256512       0.096500       0.149300       0.115000       0.846000
53488     53488     shanxi         113.5833       40.0333           80       174     2012      09        24        268              0.151292      17.364075       4.746952       0.267932       0.110000   -9999.000000       0.115000       0.757000
53488     53488     shanxi         113.5833       40.0333           80       174     2012      09        25        269              0.203625      17.812134      10.778979       0.278517   -9999.000000       0.153700       0.126200       1.000000
53488     53488     shanxi         113.5833       40.0333           80       174     2012      09        26        270              0.203958      12.973877       0.812389       0.323524       0.154000       0.259300       0.119900   -9999.000000
53488     53488     shanxi         113.5833       40.0333           80       174     2012      09        27        271              0.196286      14.837250       0.848475       0.301031   -9999.000000       0.139000       0.149700       0.835000
53488     53488     shanxi         113.5833       40.0333           80       174     2012      09        28        272              0.180600      11.345459       0.000000       0.295321       0.118000   -9999.000000       0.104000       0.798000
53488     53488     shanxi         113.5833       40.0333           80       174     2012      09        29        273              0.177208      11.433441       0.000000       0.285189       0.123000   -9999.000000       0.121900       0.698000
53488     53488     shanxi         113.5833       40.0333           80       174     2012      09        30        274              0.172417      12.068329       0.000000       0.278516       0.109000   -9999.000000   -9999.000000       0.748000
53488     53488     shanxi         113.5833       40.0333           80       174     2012      10        01        275              0.168667      13.427368       0.000000       0.273389       0.097000       0.300000       0.070600       0.523000
53488     53488     shanxi         113.5833       40.0333           80       174     2012      10        02        276              0.165292      14.659943       0.000000       0.267932       0.106000   -9999.000000       0.109200       0.703000
53488     53488     shanxi         113.5833       40.0333           80       174     2012      10        03        277              0.161417      15.381714       0.000000       0.262895   -9999.000000       0.043300       0.077200       0.761000
53488     53488     shanxi         113.5833       40.0333           80       174     2012      10        04        278              0.155750      13.670288       3.571677       0.258254   -9999.000000       0.117800       0.104300       1.000000
53488     53488     shanxi         113.5833       40.0333           80       174     2012      10        05        279              0.157875       9.876892       0.129246       0.281916       0.143000       0.158300       0.127600       1.000000
53488     53488     shanxi         113.5833       40.0333           80       174     2012      10        06        280              0.159250      11.531616       0.000000       0.275614       0.117000       0.114000       0.115900       0.606000
53488     53488     shanxi         113.5833       40.0333           80       174     2012      10        07        281              0.157792      13.082977       0.000000       0.267780       0.115000   -9999.000000       0.082000       0.800000
53488     53488     shanxi         113.5833       40.0333           80       174     2012      10        08        282              0.156958      13.695160       2.161870       0.263963   -9999.000000       0.164300       0.122800       0.954000
53488     53488     shanxi         113.5833       40.0333           80       174     2012      10        09        283              0.155958      14.614960       0.000000       0.271145       0.106000       0.199700       0.089500       0.829000
53488     53488     shanxi         113.5833       40.0333           80       174     2012      10        10        284              0.156667       9.718170       0.000000       0.269346       0.110000       0.335800       0.112200   -9999.000000
53488     53488     shanxi         113.5833       40.0333           80       174     2012      10        11        285              0.156625      10.112640       0.053261       0.263957       0.088000       0.128400       0.100800       0.711000
53488     53488     shanxi         113.5833       40.0333           80       174     2012      10        12        286              0.155167      12.276672       0.000000       0.259083       0.075000   -9999.000000       0.084900       0.909000
53488     53488     shanxi         113.5833       40.0333           80       174     2012      10        13        287              0.152042      12.303070       0.000000       0.253386   -9999.000000       0.129500       0.092600       0.842000
53488     53488     shanxi         113.5833       40.0333           80       174     2012      10        14        288              0.150167       9.323059       1.385429       0.249329       0.085000       0.180800       0.110900       0.939000
53488     53488     shanxi         113.5833       40.0333           80       174     2012      10        15        289              0.161917      10.837036      23.882969       0.255564       0.088000   -9999.000000       0.082400   -9999.000000
53488     53488     shanxi         113.5833       40.0333           80       174     2012      10        16        290              0.206042      10.780365       0.209924       0.299180   -9999.000000   -9999.000000       0.162000       0.949000
53488     53488     shanxi         113.5833       40.0333           80       174     2012      10        17        291              0.189250       5.781494       0.000000       0.316112       0.129000       0.126600   -9999.000000       0.891000
53488     53488     shanxi         113.5833       40.0333           80       174     2012      10        18        292              0.183208       6.271179       0.636471       0.301687   -9999.000000   -9999.000000       0.083100       1.000000
53488     53488     shanxi         113.5833       40.0333           80       174     2012      10        19        293              0.180391       7.178070       0.000000       0.295563   -9999.000000       0.185400       0.110100       0.754000
53488     53488     shanxi         113.5833       40.0333           80       174     2012      10        20        294              0.178458       9.262360       0.606404       0.290920       0.088000   -9999.000000       0.083200   -9999.000000
53488     53488     shanxi         113.5833       40.0333           80       174     2012      10        21        295              0.203667      11.002899      14.078046       0.287497   -9999.000000       0.176300       0.099800       0.934000
53488     53488     shanxi         113.5833       40.0333           80       174     2012      10        22        296              0.204000       5.648438       0.300795       0.334193   -9999.000000       0.266300       0.133100       0.941000
53488     53488     shanxi         113.5833       40.0333           80       174     2012      10        23        297              0.195125       6.729034       0.000000       0.311881   -9999.000000       0.170500       0.104700       0.874000
53488     53488     shanxi         113.5833       40.0333           80       174     2012      10        24        298              0.190083       8.520630       0.000000       0.303472   -9999.000000       0.076600       0.076200       0.731000
53488     53488     shanxi         113.5833       40.0333           80       174     2012      10        25        299              0.000000       8.893127       0.000000       0.297768       0.087000   -9999.000000       0.098200   -9999.000000
53488     53488     shanxi         113.5833       40.0333           80       174     2012      10        26        300              0.182125       9.660278       0.076171       0.293827       0.094000       0.348500       0.081100       0.619000
53488     53488     shanxi         113.5833       40.0333           80       174     2012      10        27        301              0.178375       9.091156       4.213220       0.292024       0.092000       0.217000       0.095200       0.713000
53488     53488     shanxi         113.5833       40.0333           80       174     2012      10        28        302              0.000000       7.804535       0.000000       0.286797       0.077000       0.253300       0.094700       0.582000
53488     53488     shanxi         113.5833       40.0333           80       174     2012      10        29        303              0.170875       8.509033       0.300355       0.286278   -9999.000000       0.142800       0.058800       0.735000
53488     53488     shanxi         113.5833       40.0333           80       174     2012      10        30        304              0.165958       4.594910       0.238608       0.261556   -9999.000000   -9999.000000       0.078800       0.298000
53488     53488     shanxi         113.5833       40.0333           80       174     2012      10        31        305              0.164667       3.491394       0.000000       0.255934       0.079000   -9999.000000       0.041600       0.666000
53488     53488     shanxi         113.5833       40.0333           80       174     2012      11        01        306              0.164208       4.072266       0.000000       0.264105       0.079000   -9999.000000       0.064500       0.665000
53488     53488     shanxi         113.5833       40.0333           80       174     2012      11        02        307              0.164250       5.270172       0.345283       0.274762       0.082000   -9999.000000       0.080500       0.785000
53488     53488     shanxi         113.5833       40.0333           80       174     2012      11        03        308              0.172792       7.877350       0.429093       0.278480   -9999.000000   -9999.000000   -9999.000000       0.770000
53488     53488     shanxi         113.5833       40.0333           80       174     2012      11        04        309              0.163125       0.237732       0.000000       0.217758   -9999.000000   -9999.000000       0.045500       0.569000
53488     53488     shanxi         113.5833       40.0333           80       174     2012      11        05        310              0.159375      -3.171387       0.249588       0.149085   -9999.000000       0.290100       0.060400       0.608000
53488     53488     shanxi         113.5833       40.0333           80       174     2012      11        06        311              0.159167      -1.125092       0.051515       0.184044   -9999.000000       0.100800       0.059200       0.464000
53488     53488     shanxi         113.5833       40.0333           80       174     2012      11        07        312              0.159042       0.785950       0.000000       0.214191   -9999.000000   -9999.000000       0.067800       0.673000
53488     53488     shanxi         113.5833       40.0333           80       174     2012      11        08        313              0.160708       0.961639       0.000000       0.222185   -9999.000000       0.080200   -9999.000000   -9999.000000
53488     53488     shanxi         113.5833       40.0333           80       174     2012      11        09        314              0.165625       2.157257       0.221723       0.238272   -9999.000000       0.176700       0.068100       0.745000
53488     53488     shanxi         113.5833       40.0333           80       174     2012      11        10        315              0.189958       3.163879       0.418046       0.262124   -9999.000000       0.152800       0.039200       0.567000
53488     53488     shanxi         113.5833       40.0333           80       174     2012      11        11        316              0.153500      -1.396271       0.000000       0.199258   -9999.000000   -9999.000000       0.056300       0.335000
53488     53488     shanxi         113.5833       40.0333           80       174     2012      11        12        317              0.123083      -4.024750       0.000000       0.150905   -9999.000000   -9999.000000       0.031100       0.460000
53488     53488     shanxi         113.5833       40.0333           80       174     2012      11        13        318              0.000000      -3.112610       0.000000       0.161120   -9999.000000       0.066700       0.054400   -9999.000000
53488     53488     shanxi         113.5833       40.0333           80       174     2012      11        14        319              0.108696      -4.369019       0.000000       0.150637   -9999.000000       0.112600   -9999.000000       0.412000
53488     53488     shanxi         113.5833       40.0333           80       174     2012      11        15        320              0.115125      -2.757172       0.303499       0.164023   -9999.000000   -9999.000000       0.032300       0.352000
53488     53488     shanxi         113.5833       40.0333           80       174     2012      11        16        321              0.119542      -0.699554       0.000000       0.185387   -9999.000000   -9999.000000       0.049000       0.329000
53488     53488     shanxi         113.5833       40.0333           80       174     2012      11        17        322              0.000000      -3.235931       0.000000       0.165415   -9999.000000   -9999.000000       0.023700       0.408000
53488     53488     shanxi         113.5833       40.0333           80       174     2012      11        18        323              0.108875      -2.184753       0.000000       0.169952   -9999.000000   -9999.000000       0.045600   -9999.000000
53488     53488     shanxi         113.5833       40.0333           80       174     2012      11        19        324              0.107792      -1.772430       0.000000       0.181425   -9999.000000       0.043800       0.060100       0.527000
53488     53488     shanxi         113.5833       40.0333           80       174     2012      11        20        325              0.113833      -2.236176       0.000000       0.170136   -9999.000000       0.066600       0.058900       0.624000
53488     53488     shanxi         113.5833       40.0333           80       174     2012      11        21        326              0.124083      -0.742523       0.000000       0.184616   -9999.000000   -9999.000000       0.036200       0.857000
53488     53488     shanxi         113.5833       40.0333           80       174     2012      11        22        327              0.116958       0.561707       0.000000       0.206658   -9999.000000       0.043500       0.055700       0.379000
53488     53488     shanxi         113.5833       40.0333           80       174     2012      11        23        328              0.100792      -3.924774       0.000000       0.161852   -9999.000000       0.190500       0.039900   -9999.000000
53488     53488     shanxi         113.5833       40.0333           80       174     2012      11        24        329              0.101833      -4.773926       0.000000       0.144955   -9999.000000       0.035200       0.057700       0.139000
53488     53488     shanxi         113.5833       40.0333           80       174     2012      11        25        330              0.100750      -2.043671       0.000000       0.167625   -9999.000000       0.190000       0.055000       0.578000
53488     53488     shanxi         113.5833       40.0333           80       174     2012      11        26        331              0.096917      -3.767090       0.000000       0.153218   -9999.000000   -9999.000000   -9999.000000       0.234000
53488     53488     shanxi         113.5833       40.0333           80       174     2012      11        27        332              0.099875      -3.485168       0.118927       0.150785   -9999.000000   -9999.000000       0.042900       0.514000
53488     53488     shanxi         113.5833       40.0333           80       174     2012      11        28        333              0.094667      -2.538391       0.000000       0.169311   -9999.000000       0.112500       0.053100       0.259000
53488     53488     shanxi         113.5833       40.0333           80       174     2012      11        29        334              0.090625      -5.957001       0.000000       0.139861   -9999.000000       0.009100       0.030000       0.150000
53488     53488     shanxi         113.5833       40.0333           80       174     2012      11        30        335              0.089875      -5.912201       0.000000       0.138915   -9999.000000   -9999.000000       0.049900       0.374000
53488     53488     shanxi         113.5833       40.0333           80       174     2012      12        01        336              0.088208      -6.481598       0.000000       0.132256   -9999.000000   -9999.000000   -9999.000000       0.349000
53488     53488     shanxi         113.5833       40.0333           80       174     2012      12        02        337              0.089167      -5.500885       0.164382       0.132522   -9999.000000   -9999.000000       0.032400       0.079000
53488     53488     shanxi         113.5833       40.0333           80       174     2012      12        03        338              0.087542      -3.956085       0.000000       0.145781   -9999.000000   -9999.000000       0.047700       0.110000
53488     53488     shanxi         113.5833       40.0333           80       174     2012      12        04        339              0.086750      -7.495026       0.000000       0.131884   -9999.000000   -9999.000000       0.032400       0.364000
53488     53488     shanxi         113.5833       40.0333           80       174     2012      12        05        340              0.084542      -6.645844       0.000000       0.132535   -9999.000000   -9999.000000       0.033700       0.201000
53488     53488     shanxi         113.5833       40.0333           80       174     2012      12        06        341              0.084208      -9.498169       0.000000       0.128460   -9999.000000   -9999.000000       0.048600       0.008000
53488     53488     shanxi         113.5833       40.0333           80       174     2012      12        07        342              0.083042      -8.132385       0.000000       0.128354   -9999.000000   -9999.000000       0.048000   -9999.000000
53488     53488     shanxi         113.5833       40.0333           80       174     2012      12        08        343              0.081083     -10.521057       0.000000       0.126466   -9999.000000   -9999.000000       0.030500       0.207000
53488     53488     shanxi         113.5833       40.0333           80       174     2012      12        09        344              0.081250     -12.688202       0.000000       0.122299   -9999.000000   -9999.000000       0.049400       0.461000
53488     53488     shanxi         113.5833       40.0333           80       174     2012      12        10        345              0.082500     -10.262817       0.000000       0.122696   -9999.000000   -9999.000000       0.034200       0.184000
53488     53488     shanxi         113.5833       40.0333           80       174     2012      12        11        346              0.082875      -7.997955       0.000000       0.125051   -9999.000000   -9999.000000       0.050400       0.269000
53488     53488     shanxi         113.5833       40.0333           80       174     2012      12        12        347              0.082792      -7.686462       0.000000       0.124659   -9999.000000   -9999.000000       0.052800   -9999.000000
53488     53488     shanxi         113.5833       40.0333           80       174     2012      12        13        348              0.082833      -7.416107       0.360484       0.126402   -9999.000000   -9999.000000       0.036400       0.098000
53488     53488     shanxi         113.5833       40.0333           80       174     2012      12        14        349              0.085833      -7.024567       0.417839       0.124884   -9999.000000   -9999.000000       0.046400       0.435000
53488     53488     shanxi         113.5833       40.0333           80       174     2012      12        15        350              0.000000      -5.685730       0.000000       0.127616   -9999.000000   -9999.000000       0.050900       0.176000
53488     53488     shanxi         113.5833       40.0333           80       174     2012      12        16        351              0.089542      -3.304901       0.000000       0.151698   -9999.000000   -9999.000000       0.037300       0.272000
53488     53488     shanxi         113.5833       40.0333           80       174     2012      12        17        352              0.083500      -4.123444       0.000000       0.152997   -9999.000000       0.023700       0.044400   -9999.000000
53488     53488     shanxi         113.5833       40.0333           80       174     2012      12        18        353              0.081625      -9.917511       0.000000       0.127154   -9999.000000   -9999.000000   -9999.000000       0.155000
53488     53488     shanxi         113.5833       40.0333           80       174     2012      12        19        354              0.082875      -9.136688       0.000000       0.123896   -9999.000000   -9999.000000       0.021300       0.310000
53488     53488     shanxi         113.5833       40.0333           80       174     2012      12        20        355              0.000000      -7.152100       0.963927       0.127370   -9999.000000   -9999.000000       0.040500       0.512000
53488     53488     shanxi         113.5833       40.0333           80       174     2012      12        21        356              0.083083      -7.329620       0.000000       0.125379   -9999.000000   -9999.000000       0.027900       0.242000
53488     53488     shanxi         113.5833       40.0333           80       174     2012      12        22        357              0.080167     -10.254547       0.000000       0.124133   -9999.000000   -9999.000000       0.029400   -9999.000000
53488     53488     shanxi         113.5833       40.0333           80       174     2012      12        23        358              0.078375     -15.088318       0.000000       0.121582   -9999.000000   -9999.000000   -9999.000000       0.252000
53488     53488     shanxi         113.5833       40.0333           80       174     2012      12        24        359              0.077737     -16.232971       0.000000       0.116760   -9999.000000   -9999.000000       0.041500       0.176000
53488     53488     shanxi         113.5833       40.0333           80       174     2012      12        25        360              0.078500     -15.010071       0.000000       0.117500   -9999.000000   -9999.000000       0.027200       0.337000
53488     53488     shanxi         113.5833       40.0333           80       174     2012      12        26        361              0.000000     -13.655579       0.000000       0.117833   -9999.000000   -9999.000000       0.045100       0.521000
53488     53488     shanxi         113.5833       40.0333           80       174     2012      12        27        362              0.079700     -11.021362       0.000000       0.118672   -9999.000000   -9999.000000       0.018200       0.261000
53488     53488     shanxi         113.5833       40.0333           80       174     2012      12        28        363              0.080000      -8.639313       0.688273       0.120980   -9999.000000   -9999.000000       0.042100       0.455000
53488     53488     shanxi         113.5833       40.0333           80       174     2012      12        29        364              0.000000      -9.780670       0.000000       0.120224   -9999.000000   -9999.000000   -9999.000000       0.308000
53488     53488     shanxi         113.5833       40.0333           80       174     2012      12        30        365              0.000000     -13.132019       0.000000       0.119163   -9999.000000   -9999.000000       0.021200       0.543000
53488     53488     shanxi         113.5833       40.0333           80       174     2012      12        31        366              0.079800     -12.226532       0.000000       0.118767   -9999.000000   -9999.000000       0.043000   -9999.000000
