# Supplementary material for: Research on Fusing Multisatellite Soil Moisture Data Based on Bayesian Model Averaging
Source: Hindawi journal article supplement (doi:10.1155/2018/9310838), 2018-06-25
Supplement: f1 [file 9310838.f1.zip › 2012_sm00-10cm_daily_ZDB_ZHY_53490_366days_allin.txt]

53490     53490     shanxi         114.0644       40.4408           78       176     2012      01        01        001              0.000000   -9999.000000       0.000000   -9999.000000   -9999.000000   -9999.000000       0.043500   -9999.000000
53490     53490     shanxi         114.0644       40.4408           78       176     2012      01        02        002              0.012667      -9.316681       0.000000       0.092490   -9999.000000   -9999.000000       0.049100       0.044000
53490     53490     shanxi         114.0644       40.4408           78       176     2012      01        03        003              0.000000     -12.985016       0.000000       0.090523   -9999.000000   -9999.000000       0.048700       0.164000
53490     53490     shanxi         114.0644       40.4408           78       176     2012      01        04        004              0.011083     -15.072723       0.000000       0.089820   -9999.000000   -9999.000000       0.048800   -9999.000000
53490     53490     shanxi         114.0644       40.4408           78       176     2012      01        05        005              0.011333     -12.794586       0.000000       0.089584   -9999.000000   -9999.000000       0.054400       0.090000
53490     53490     shanxi         114.0644       40.4408           78       176     2012      01        06        006              0.011375     -11.997162       0.000000       0.089239   -9999.000000   -9999.000000       0.037600       0.108000
53490     53490     shanxi         114.0644       40.4408           78       176     2012      01        07        007              0.011583     -12.334198       0.000000       0.088779   -9999.000000   -9999.000000       0.044200       0.070000
53490     53490     shanxi         114.0644       40.4408           78       176     2012      01        08        008              0.000000     -11.367950       0.000000       0.088976   -9999.000000   -9999.000000       0.048800       0.181000
53490     53490     shanxi         114.0644       40.4408           78       176     2012      01        09        009              0.011875     -10.938324       0.000000       0.088986   -9999.000000   -9999.000000   -9999.000000   -9999.000000
53490     53490     shanxi         114.0644       40.4408           78       176     2012      01        10        010              0.011478     -10.463531       0.000000       0.088908   -9999.000000   -9999.000000       0.048500       0.067000
53490     53490     shanxi         114.0644       40.4408           78       176     2012      01        11        011              0.011250     -12.941132       0.000000       0.088314   -9999.000000   -9999.000000       0.053100       0.123000
53490     53490     shanxi         114.0644       40.4408           78       176     2012      01        12        012              0.012042     -11.224426       0.000000       0.088428   -9999.000000   -9999.000000       0.045200       0.109000
53490     53490     shanxi         114.0644       40.4408           78       176     2012      01        13        013              0.012000     -10.286957       0.000000       0.088427   -9999.000000   -9999.000000       0.046800       0.121000
53490     53490     shanxi         114.0644       40.4408           78       176     2012      01        14        014              0.012292     -10.517395       0.000000       0.087932   -9999.000000   -9999.000000       0.049100   -9999.000000
53490     53490     shanxi         114.0644       40.4408           78       176     2012      01        15        015              0.012417     -10.699249       0.000000       0.087778   -9999.000000   -9999.000000       0.048500       0.065000
53490     53490     shanxi         114.0644       40.4408           78       176     2012      01        16        016              0.011625     -10.671234       0.000000       0.087770   -9999.000000   -9999.000000       0.050600       0.106000
53490     53490     shanxi         114.0644       40.4408           78       176     2012      01        17        017              0.000000     -10.327423       0.000000       0.088102   -9999.000000   -9999.000000       0.055500       0.053000
53490     53490     shanxi         114.0644       40.4408           78       176     2012      01        18        018              0.012167     -10.433075       0.000000       0.088319   -9999.000000   -9999.000000       0.044400       0.095000
53490     53490     shanxi         114.0644       40.4408           78       176     2012      01        19        019              0.012625      -9.424713       0.000000       0.088901   -9999.000000   -9999.000000       0.054400       0.026000
53490     53490     shanxi         114.0644       40.4408           78       176     2012      01        20        020              0.011333     -10.439117       0.000000       0.087961   -9999.000000   -9999.000000       0.050000       0.085000
53490     53490     shanxi         114.0644       40.4408           78       176     2012      01        21        021              0.010417     -16.220367       0.000000       0.086487   -9999.000000   -9999.000000       0.048500       0.056000
53490     53490     shanxi         114.0644       40.4408           78       176     2012      01        22        022              0.010042     -16.752167       0.000000       0.085839   -9999.000000   -9999.000000       0.056700       0.073000
53490     53490     shanxi         114.0644       40.4408           78       176     2012      01        23        023              0.010208     -15.834015       0.000000       0.085927   -9999.000000   -9999.000000       0.043900       0.031000
53490     53490     shanxi         114.0644       40.4408           78       176     2012      01        24        024              0.010542     -14.904266       0.000000       0.086145   -9999.000000   -9999.000000   -9999.000000       0.080000
53490     53490     shanxi         114.0644       40.4408           78       176     2012      01        25        025              0.010792     -14.162079       0.000000       0.086258   -9999.000000   -9999.000000       0.056600       0.114000
53490     53490     shanxi         114.0644       40.4408           78       176     2012      01        26        026              0.011167     -11.865814       0.000000       0.086758   -9999.000000   -9999.000000       0.061800       0.039000
53490     53490     shanxi         114.0644       40.4408           78       176     2012      01        27        027              0.011458     -11.281281       0.000000       0.086513   -9999.000000   -9999.000000       0.056800       0.150000
53490     53490     shanxi         114.0644       40.4408           78       176     2012      01        28        028              0.011583     -10.100159       0.000000       0.086322   -9999.000000   -9999.000000       0.059300   -9999.000000
53490     53490     shanxi         114.0644       40.4408           78       176     2012      01        29        029              0.011542     -12.517853       0.000000       0.085817   -9999.000000   -9999.000000       0.050400       0.177000
53490     53490     shanxi         114.0644       40.4408           78       176     2012      01        30        030              0.011917     -12.698029       0.000000       0.085243   -9999.000000   -9999.000000       0.057300       0.147000
53490     53490     shanxi         114.0644       40.4408           78       176     2012      01        31        031              0.011125     -10.456787       0.000000       0.085548   -9999.000000   -9999.000000       0.058300       0.077000
53490     53490     shanxi         114.0644       40.4408           78       176     2012      02        01        032              0.010625     -14.492798       0.000000       0.085065   -9999.000000   -9999.000000       0.060500       0.222000
53490     53490     shanxi         114.0644       40.4408           78       176     2012      02        02        033              0.010625     -15.562256       0.000000       0.084498   -9999.000000   -9999.000000       0.060800   -9999.000000
53490     53490     shanxi         114.0644       40.4408           78       176     2012      02        03        034              0.011542     -13.259033       0.000000       0.084733   -9999.000000   -9999.000000       0.060300       0.078000
53490     53490     shanxi         114.0644       40.4408           78       176     2012      02        04        035              0.011583     -12.393707       0.000000       0.084947   -9999.000000   -9999.000000       0.049000       0.124000
53490     53490     shanxi         114.0644       40.4408           78       176     2012      02        05        036              0.012875     -10.508301       0.000000       0.085058   -9999.000000   -9999.000000       0.059800       0.059000
53490     53490     shanxi         114.0644       40.4408           78       176     2012      02        06        037              0.011208      -9.203796       0.000000       0.087337   -9999.000000   -9999.000000       0.055600       0.228000
53490     53490     shanxi         114.0644       40.4408           78       176     2012      02        07        038              0.010875     -16.127625       0.000000       0.083951   -9999.000000   -9999.000000       0.058900   -9999.000000
53490     53490     shanxi         114.0644       40.4408           78       176     2012      02        08        039              0.011167     -15.088165       0.000000       0.084120   -9999.000000   -9999.000000       0.063500       0.084000
53490     53490     shanxi         114.0644       40.4408           78       176     2012      02        09        040              0.011042     -12.086243       0.000000       0.084830   -9999.000000   -9999.000000       0.047500       0.151000
53490     53490     shanxi         114.0644       40.4408           78       176     2012      02        10        041              0.011500     -11.852142       0.000000       0.084664   -9999.000000   -9999.000000       0.053200       0.030000
53490     53490     shanxi         114.0644       40.4408           78       176     2012      02        11        042              0.012792     -10.201385       0.000000       0.084829   -9999.000000   -9999.000000       0.057200       0.169000
53490     53490     shanxi         114.0644       40.4408           78       176     2012      02        12        043              0.012000      -8.113922       0.000000       0.092586   -9999.000000   -9999.000000   -9999.000000   -9999.000000
53490     53490     shanxi         114.0644       40.4408           78       176     2012      02        13        044              0.014583      -7.313080       0.000000       0.095377   -9999.000000   -9999.000000   -9999.000000       0.113000
53490     53490     shanxi         114.0644       40.4408           78       176     2012      02        14        045              0.014875      -5.572266       0.129718       0.112393   -9999.000000   -9999.000000       0.066100       0.169000
53490     53490     shanxi         114.0644       40.4408           78       176     2012      02        15        046              0.013125      -9.345398       0.000000       0.097379   -9999.000000   -9999.000000       0.059000       0.132000
53490     53490     shanxi         114.0644       40.4408           78       176     2012      02        16        047              0.012167     -10.060730       0.000000       0.093925   -9999.000000   -9999.000000       0.060000       0.102000
53490     53490     shanxi         114.0644       40.4408           78       176     2012      02        17        048              0.011833     -12.345795       0.000000       0.090998   -9999.000000   -9999.000000       0.064800       0.033000
53490     53490     shanxi         114.0644       40.4408           78       176     2012      02        18        049              0.012500     -12.421936       3.630103       0.090885   -9999.000000   -9999.000000       0.062600       0.139000
53490     53490     shanxi         114.0644       40.4408           78       176     2012      02        19        050              0.012708     -10.416351       0.092493       0.091495   -9999.000000   -9999.000000       0.063000       0.150000
53490     53490     shanxi         114.0644       40.4408           78       176     2012      02        20        051              0.015875      -8.259064       0.000000       0.092498       0.081000   -9999.000000       0.068100       0.086000
53490     53490     shanxi         114.0644       40.4408           78       176     2012      02        21        052              0.019833      -4.990570       0.041341       0.125924       0.078000   -9999.000000   -9999.000000       0.182000
53490     53490     shanxi         114.0644       40.4408           78       176     2012      02        22        053              0.017708      -1.549164       0.000000       0.146542   -9999.000000       0.095700       0.063200       0.182000
53490     53490     shanxi         114.0644       40.4408           78       176     2012      02        23        054              0.020250      -5.302307       0.000000       0.129137       0.075000   -9999.000000       0.060800       0.003000
53490     53490     shanxi         114.0644       40.4408           78       176     2012      02        24        055              0.017833      -3.463287       0.000000       0.128876   -9999.000000   -9999.000000       0.057100       0.098000
53490     53490     shanxi         114.0644       40.4408           78       176     2012      02        25        056              0.015667      -7.882507       0.000000       0.107603   -9999.000000   -9999.000000       0.063300       0.189000
53490     53490     shanxi         114.0644       40.4408           78       176     2012      02        26        057              0.018625      -7.702515       0.000000       0.101636       0.064000   -9999.000000       0.052600   -9999.000000
53490     53490     shanxi         114.0644       40.4408           78       176     2012      02        27        058              0.018917      -6.258942       0.000000       0.118510   -9999.000000   -9999.000000   -9999.000000       0.090000
53490     53490     shanxi         114.0644       40.4408           78       176     2012      02        28        059              0.021375      -4.569244       0.000000       0.128636       0.078000       0.091800       0.061000       0.213000
53490     53490     shanxi         114.0644       40.4408           78       176     2012      02        29        060              0.000000   -9999.000000       0.000000   -9999.000000       0.080000       0.063800   -9999.000000   -9999.000000
53490     53490     shanxi         114.0644       40.4408           78       176     2012      03        01        061              0.023708      -2.052948       0.000000       0.143278   -9999.000000   -9999.000000       0.060100       0.273000
53490     53490     shanxi         114.0644       40.4408           78       176     2012      03        02        062              0.021792      -2.990997       0.113568       0.130907   -9999.000000       0.032000       0.068500   -9999.000000
53490     53490     shanxi         114.0644       40.4408           78       176     2012      03        03        063              0.022958      -2.660217       0.974007       0.133910   -9999.000000   -9999.000000       0.058700       0.237000
53490     53490     shanxi         114.0644       40.4408           78       176     2012      03        04        064              0.021167      -4.070526       0.000000       0.123915   -9999.000000   -9999.000000       0.060500       0.202000
53490     53490     shanxi         114.0644       40.4408           78       176     2012      03        05        065              0.015750      -3.604370       0.000000       0.125676   -9999.000000   -9999.000000       0.064300       0.107000
53490     53490     shanxi         114.0644       40.4408           78       176     2012      03        06        066              0.017667      -6.903503       0.000000       0.108176   -9999.000000       0.095900       0.059800       0.262000
53490     53490     shanxi         114.0644       40.4408           78       176     2012      03        07        067              0.000000      -5.210297       0.000000       0.111415   -9999.000000       0.055600       0.060600   -9999.000000
53490     53490     shanxi         114.0644       40.4408           78       176     2012      03        08        068              0.018833      -6.580963       0.000000       0.113116   -9999.000000   -9999.000000       0.066500       0.143000
53490     53490     shanxi         114.0644       40.4408           78       176     2012      03        09        069              0.023958      -6.634369       0.193385       0.111396   -9999.000000   -9999.000000       0.056600       0.211000
53490     53490     shanxi         114.0644       40.4408           78       176     2012      03        10        070              0.019583      -3.371979       0.000000       0.135298   -9999.000000   -9999.000000       0.062400       0.173000
53490     53490     shanxi         114.0644       40.4408           78       176     2012      03        11        071              0.019458      -9.394806       0.000000       0.098389       0.077000   -9999.000000   -9999.000000       0.265000
53490     53490     shanxi         114.0644       40.4408           78       176     2012      03        12        072              0.021792      -7.175690       0.376574       0.108259       0.082000   -9999.000000       0.059700   -9999.000000
53490     53490     shanxi         114.0644       40.4408           78       176     2012      03        13        073              0.025958      -3.341919       0.054663       0.133643       0.070000   -9999.000000       0.063900       0.191000
53490     53490     shanxi         114.0644       40.4408           78       176     2012      03        14        074              0.027913      -1.391602       0.349786       0.152617   -9999.000000   -9999.000000   -9999.000000       0.354000
53490     53490     shanxi         114.0644       40.4408           78       176     2012      03        15        075              0.034500       0.567291       0.000000       0.165038   -9999.000000       0.113400       0.067000       0.188000
53490     53490     shanxi         114.0644       40.4408           78       176     2012      03        16        076              0.040875       1.831818       0.000000       0.181457       0.092000   -9999.000000       0.069700       0.188000
53490     53490     shanxi         114.0644       40.4408           78       176     2012      03        17        077              0.039417       3.607910       0.000000       0.195238       0.081000       0.036400       0.068900       0.255000
53490     53490     shanxi         114.0644       40.4408           78       176     2012      03        18        078              0.039250       0.805542       0.000000       0.173102       0.075000   -9999.000000       0.059700       0.184000
53490     53490     shanxi         114.0644       40.4408           78       176     2012      03        19        079              0.042292      -0.555817       0.000000       0.155583   -9999.000000   -9999.000000       0.064000       0.298000
53490     53490     shanxi         114.0644       40.4408           78       176     2012      03        20        080              0.044167       0.864197       0.165688       0.166331       0.069000       0.046500       0.060900       0.356000
53490     53490     shanxi         114.0644       40.4408           78       176     2012      03        21        081              0.044708       2.417236       0.204353       0.179239       0.077000   -9999.000000       0.073400       0.263000
53490     53490     shanxi         114.0644       40.4408           78       176     2012      03        22        082              0.044750       2.268555       0.132022       0.187499       0.076000   -9999.000000       0.077100       0.294000
53490     53490     shanxi         114.0644       40.4408           78       176     2012      03        23        083              0.040708       2.136200       0.000000       0.186961   -9999.000000   -9999.000000       0.062900       0.120000
53490     53490     shanxi         114.0644       40.4408           78       176     2012      03        24        084              0.041500      -0.579010       0.000000       0.154729   -9999.000000   -9999.000000   -9999.000000       0.247000
53490     53490     shanxi         114.0644       40.4408           78       176     2012      03        25        085              0.000000       1.663208       0.000000       0.174858   -9999.000000       0.096700       0.068000       0.355000
53490     53490     shanxi         114.0644       40.4408           78       176     2012      03        26        086              0.043167       3.638611       0.000000       0.184942       0.073000   -9999.000000       0.061500   -9999.000000
53490     53490     shanxi         114.0644       40.4408           78       176     2012      03        27        087              0.042458       5.092682       0.000000       0.192919       0.076000   -9999.000000       0.067300       0.195000
53490     53490     shanxi         114.0644       40.4408           78       176     2012      03        28        088              0.044292       6.291443       0.407201       0.194287       0.075000   -9999.000000   -9999.000000       0.501000
53490     53490     shanxi         114.0644       40.4408           78       176     2012      03        29        089              0.051125       8.080933       0.000000       0.215969   -9999.000000   -9999.000000       0.062400       0.503000
53490     53490     shanxi         114.0644       40.4408           78       176     2012      03        30        090              0.048792       4.686188       0.000000       0.183264   -9999.000000       0.042400       0.074000       0.348000
53490     53490     shanxi         114.0644       40.4408           78       176     2012      03        31        091              0.050125       0.575897       1.545651       0.165404       0.074000   -9999.000000       0.062800   -9999.000000
53490     53490     shanxi         114.0644       40.4408           78       176     2012      04        01        092              0.049042       4.393829       0.000000       0.188652       0.071000   -9999.000000       0.065500       0.301000
53490     53490     shanxi         114.0644       40.4408           78       176     2012      04        02        093              0.044833       4.627045       0.228352       0.188933       0.082000   -9999.000000       0.068900       0.280000
53490     53490     shanxi         114.0644       40.4408           78       176     2012      04        03        094              0.046375       1.446411       0.000000       0.164656       0.065000       0.092400       0.069300       0.260000
53490     53490     shanxi         114.0644       40.4408           78       176     2012      04        04        095              0.046625       4.396820       0.000000       0.193556   -9999.000000       0.023000       0.064300       0.302000
53490     53490     shanxi         114.0644       40.4408           78       176     2012      04        05        096              0.045417       4.765961       0.000000       0.185183       0.075000       0.101900       0.070900   -9999.000000
53490     53490     shanxi         114.0644       40.4408           78       176     2012      04        06        097              0.045583       4.854004       0.000000       0.193228       0.081000   -9999.000000       0.061700       0.279000
53490     53490     shanxi         114.0644       40.4408           78       176     2012      04        07        098              0.043583       7.835022       0.000000       0.200922       0.076000       0.058900       0.067500       0.480000
53490     53490     shanxi         114.0644       40.4408           78       176     2012      04        08        099              0.041833       9.890472       0.000000       0.194862       0.068000   -9999.000000       0.064300       0.118000
53490     53490     shanxi         114.0644       40.4408           78       176     2012      04        09        100              0.040125      10.052704       0.000000       0.193943       0.074000   -9999.000000       0.066600       0.463000
53490     53490     shanxi         114.0644       40.4408           78       176     2012      04        10        101              0.037458      12.258209       2.149222       0.191695   -9999.000000       0.105400       0.071000   -9999.000000
53490     53490     shanxi         114.0644       40.4408           78       176     2012      04        11        102              0.037750       7.440735       0.000000       0.200235       0.068000   -9999.000000       0.067000       0.182000
53490     53490     shanxi         114.0644       40.4408           78       176     2012      04        12        103              0.037875       5.511108       0.000000       0.196985       0.070000   -9999.000000       0.061900       0.485000
53490     53490     shanxi         114.0644       40.4408           78       176     2012      04        13        104              0.037208       8.928192       0.000000       0.201154       0.064000   -9999.000000       0.066800       0.227000
53490     53490     shanxi         114.0644       40.4408           78       176     2012      04        14        105              0.035958      11.474182       0.000000       0.196626       0.073000   -9999.000000   -9999.000000       0.194000
53490     53490     shanxi         114.0644       40.4408           78       176     2012      04        15        106              0.033458      12.781464       0.000000       0.188733   -9999.000000       0.065800       0.060400       0.096000
53490     53490     shanxi         114.0644       40.4408           78       176     2012      04        16        107              0.032792       9.005066       0.000000       0.176998       0.066000   -9999.000000       0.067300       0.356000
53490     53490     shanxi         114.0644       40.4408           78       176     2012      04        17        108              0.031750      11.483582       0.000000       0.181651       0.073000       0.145000       0.058300       0.452000
53490     53490     shanxi         114.0644       40.4408           78       176     2012      04        18        109              0.036542      14.559509       1.110940       0.175253       0.073000   -9999.000000   -9999.000000       0.404000
53490     53490     shanxi         114.0644       40.4408           78       176     2012      04        19        110              0.042458      11.869568       0.000000       0.189090       0.073000       0.206800       0.065200       0.373000
53490     53490     shanxi         114.0644       40.4408           78       176     2012      04        20        111              0.042417      12.088013       0.200117       0.186514       0.087000   -9999.000000       0.084900       0.233000
53490     53490     shanxi         114.0644       40.4408           78       176     2012      04        21        112              0.043125      12.735718       0.000000       0.181254       0.071500   -9999.000000       0.064600       0.185000
53490     53490     shanxi         114.0644       40.4408           78       176     2012      04        22        113              0.043167      14.104736       0.259275       0.177114       0.070000       0.060800       0.073700       0.290000
53490     53490     shanxi         114.0644       40.4408           78       176     2012      04        23        114              0.042375      17.433044      15.567871       0.170286       0.073000   -9999.000000       0.067800       0.419000
53490     53490     shanxi         114.0644       40.4408           78       176     2012      04        24        115              0.047542      15.868835      11.349707       0.222914       0.126000   -9999.000000       0.090100   -9999.000000
53490     53490     shanxi         114.0644       40.4408           78       176     2012      04        25        116              0.000000       6.513733       0.000000       0.292578   -9999.000000       0.134200       0.072500       0.224000
53490     53490     shanxi         114.0644       40.4408           78       176     2012      04        26        117              0.046708       6.655151       0.142285       0.263243       0.070000   -9999.000000       0.066400       0.422000
53490     53490     shanxi         114.0644       40.4408           78       176     2012      04        27        118              0.045333      10.836578       0.000000       0.252486       0.069000   -9999.000000   -9999.000000       0.219000
53490     53490     shanxi         114.0644       40.4408           78       176     2012      04        28        119              0.043917       8.294678       0.000000       0.241170       0.066000       0.105800       0.071100       0.358000
53490     53490     shanxi         114.0644       40.4408           78       176     2012      04        29        120              0.043167      11.402740       0.000000       0.234801       0.068500       0.022600       0.062400   -9999.000000
53490     53490     shanxi         114.0644       40.4408           78       176     2012      04        30        121              0.039375      15.279144       0.000000       0.226323       0.073000       0.068600       0.065400       0.199000
53490     53490     shanxi         114.0644       40.4408           78       176     2012      05        01        122              0.038174      14.092590       0.067682       0.222956       0.087000   -9999.000000       0.085500       0.390000
53490     53490     shanxi         114.0644       40.4408           78       176     2012      05        02        123              0.036542      15.577728       0.000000       0.218980       0.067500   -9999.000000       0.063500       0.215000
53490     53490     shanxi         114.0644       40.4408           78       176     2012      05        03        124              0.033750      16.050934       0.000000       0.208981       0.068000   -9999.000000       0.068600       0.407000
53490     53490     shanxi         114.0644       40.4408           78       176     2012      05        04        125              0.030500      17.812897       0.000000       0.199293       0.061000   -9999.000000       0.060800   -9999.000000
53490     53490     shanxi         114.0644       40.4408           78       176     2012      05        05        126              0.027625      19.165955       0.000000       0.188944       0.071000       0.024800       0.057000       0.234000
53490     53490     shanxi         114.0644       40.4408           78       176     2012      05        06        127              0.025083      18.688629       0.000000       0.181653       0.069000   -9999.000000       0.059900       0.361000
53490     53490     shanxi         114.0644       40.4408           78       176     2012      05        07        128              0.023000      20.827057       0.378744       0.173898   -9999.000000   -9999.000000       0.067100       0.261000
53490     53490     shanxi         114.0644       40.4408           78       176     2012      05        08        129              0.021375      20.276947       0.000000       0.175084       0.067000       0.032000       0.066400       0.369000
53490     53490     shanxi         114.0644       40.4408           78       176     2012      05        09        130              0.019750      19.920746       0.038365       0.169456       0.084000   -9999.000000       0.078700   -9999.000000
53490     53490     shanxi         114.0644       40.4408           78       176     2012      05        10        131              0.030083      17.314453       7.267583       0.172111       0.074500   -9999.000000       0.062900       0.208000
53490     53490     shanxi         114.0644       40.4408           78       176     2012      05        11        132              0.201458      19.733826      11.545668       0.195520   -9999.000000       0.153300       0.151700       1.000000
53490     53490     shanxi         114.0644       40.4408           78       176     2012      05        12        133              0.156125      12.307220       0.000000       0.286564       0.147000       0.068100       0.130600       0.978000
53490     53490     shanxi         114.0644       40.4408           78       176     2012      05        13        134              0.121792      12.618378       0.000000       0.259613       0.104000       0.182100       0.091000       0.792000
53490     53490     shanxi         114.0644       40.4408           78       176     2012      05        14        135              0.106792      11.757965       0.000000       0.242232       0.086000       0.235100       0.091800       0.430000
53490     53490     shanxi         114.0644       40.4408           78       176     2012      05        15        136              0.097958      11.302643       0.000000       0.231867       0.083000       0.095200       0.073300       0.480000
53490     53490     shanxi         114.0644       40.4408           78       176     2012      05        16        137              0.092708      11.440521       0.000000       0.225633       0.089000       0.107700       0.071900       0.296000
53490     53490     shanxi         114.0644       40.4408           78       176     2012      05        17        138              0.090500      13.556122       0.000000       0.218616       0.079000       0.136900       0.073000       0.324000
53490     53490     shanxi         114.0644       40.4408           78       176     2012      05        18        139              0.086000      18.600708       0.417554       0.206024       0.076000       0.087800       0.085900       0.598000
53490     53490     shanxi         114.0644       40.4408           78       176     2012      05        19        140              0.083583      18.324677       1.401297       0.203325       0.067000   -9999.000000       0.113200       0.445000
53490     53490     shanxi         114.0644       40.4408           78       176     2012      05        20        141              0.082250      19.088379       0.059197       0.205181       0.079000   -9999.000000       0.085400       0.420000
53490     53490     shanxi         114.0644       40.4408           78       176     2012      05        21        142              0.098333      20.399628       1.800522       0.204871       0.170000       0.159600       0.095100       0.291000
53490     53490     shanxi         114.0644       40.4408           78       176     2012      05        22        143              0.102500      16.181152       0.000000       0.214118       0.109000   -9999.000000       0.071600       0.433000
53490     53490     shanxi         114.0644       40.4408           78       176     2012      05        23        144              0.089042      15.179260       0.131321       0.208143   -9999.000000       0.094900       0.066600   -9999.000000
53490     53490     shanxi         114.0644       40.4408           78       176     2012      05        24        145              0.083292      15.108002       0.000000       0.197043       0.088000   -9999.000000       0.067300       0.242000
53490     53490     shanxi         114.0644       40.4408           78       176     2012      05        25        146              0.000000      16.068512       0.051265       0.188382       0.096000       0.160700       0.070100       0.353000
53490     53490     shanxi         114.0644       40.4408           78       176     2012      05        26        147              0.075125      15.390228       0.000000       0.186705       0.096000       0.139300       0.067700       0.303000
53490     53490     shanxi         114.0644       40.4408           78       176     2012      05        27        148              0.072208      20.024231       0.000000       0.176700       0.086000       0.145700       0.059300       0.374000
53490     53490     shanxi         114.0644       40.4408           78       176     2012      05        28        149              0.068000      21.509155       2.643706       0.166959       0.084000       0.087300       0.061900   -9999.000000
53490     53490     shanxi         114.0644       40.4408           78       176     2012      05        29        150              0.066042      22.220978       2.694276       0.167020       0.157000       0.122600       0.095400       0.954000
53490     53490     shanxi         114.0644       40.4408           78       176     2012      05        30        151              0.067833      12.996735       0.000000       0.224366       0.090000       0.098300       0.068500   -9999.000000
53490     53490     shanxi         114.0644       40.4408           78       176     2012      05        31        152              0.090083      15.877228       7.295442       0.203198       0.162000   -9999.000000   -9999.000000   -9999.000000
53490     53490     shanxi         114.0644       40.4408           78       176     2012      06        01        153              0.101958      11.981842       0.122752       0.250463       0.153000   -9999.000000       0.080700       0.618000
53490     53490     shanxi         114.0644       40.4408           78       176     2012      06        02        154              0.089208      15.377319       2.076211       0.235736       0.126000       0.118100       0.065100   -9999.000000
53490     53490     shanxi         114.0644       40.4408           78       176     2012      06        03        155              0.081375      18.260315       0.905334       0.230253       0.140000       0.078400       0.079800       0.935000
53490     53490     shanxi         114.0644       40.4408           78       176     2012      06        04        156              0.077583      16.432831       0.000000       0.233574       0.093000       0.103700       0.088900       0.428000
53490     53490     shanxi         114.0644       40.4408           78       176     2012      06        05        157              0.072458      19.229034       0.248141       0.213881       0.102000       0.102800       0.079900       0.261000
53490     53490     shanxi         114.0644       40.4408           78       176     2012      06        06        158              0.065458      21.568909       4.096713       0.202774       0.140000   -9999.000000       0.126300       0.872000
53490     53490     shanxi         114.0644       40.4408           78       176     2012      06        07        159              0.063875      17.033936       0.000000       0.234920       0.109000   -9999.000000       0.080300   -9999.000000
53490     53490     shanxi         114.0644       40.4408           78       176     2012      06        08        160              0.058917      19.492828       1.377504       0.216614       0.107000       0.102900       0.080100       0.337000
53490     53490     shanxi         114.0644       40.4408           78       176     2012      06        09        161              0.052500      19.656036       1.202302       0.214320       0.124000   -9999.000000       0.095600       0.511000
53490     53490     shanxi         114.0644       40.4408           78       176     2012      06        10        162              0.052292      17.037628       0.000000       0.217993       0.082000       0.118900       0.079400       0.381000
53490     53490     shanxi         114.0644       40.4408           78       176     2012      06        11        163              0.000000      16.355255       0.063150       0.205426       0.118000   -9999.000000       0.079900       0.218000
53490     53490     shanxi         114.0644       40.4408           78       176     2012      06        12        164              0.043375      18.411072       0.807353       0.192101       0.135000   -9999.000000       0.074500       0.197000
53490     53490     shanxi         114.0644       40.4408           78       176     2012      06        13        165              0.038875      18.022766       2.644870       0.186317       0.133500       0.086700       0.066300       0.399000
53490     53490     shanxi         114.0644       40.4408           78       176     2012      06        14        166              0.036083      15.723969       0.437888       0.212220       0.147000   -9999.000000       0.085000       0.483000
53490     53490     shanxi         114.0644       40.4408           78       176     2012      06        15        167              0.035375      12.918274       1.069036       0.212201       0.114000       0.173900   -9999.000000       0.416000
53490     53490     shanxi         114.0644       40.4408           78       176     2012      06        16        168              0.032792      16.509033       0.000000       0.201919       0.117000   -9999.000000       0.067500       0.366000
53490     53490     shanxi         114.0644       40.4408           78       176     2012      06        17        169              0.028333      21.375702       0.000000       0.186386       0.116000   -9999.000000       0.075800       0.318000
53490     53490     shanxi         114.0644       40.4408           78       176     2012      06        18        170              0.024167      22.983246       0.040928       0.172868       0.096500   -9999.000000       0.061500       0.337000
53490     53490     shanxi         114.0644       40.4408           78       176     2012      06        19        171              0.021292      23.569855       3.182288       0.165804   -9999.000000   -9999.000000       0.086600       0.425000
53490     53490     shanxi         114.0644       40.4408           78       176     2012      06        20        172              0.022750      21.147583       3.146472       0.196505       0.160000   -9999.000000       0.076400       0.506000
53490     53490     shanxi         114.0644       40.4408           78       176     2012      06        21        173              0.030250      19.430450       9.123549       0.226635       0.144000   -9999.000000       0.115000   -9999.000000
53490     53490     shanxi         114.0644       40.4408           78       176     2012      06        22        174              0.042667      21.284668       0.996319       0.251152       0.152000   -9999.000000       0.083800       0.707000
53490     53490     shanxi         114.0644       40.4408           78       176     2012      06        23        175              0.045125      21.482208      10.163749       0.246624       0.107000       0.099500       0.104400       0.753000
53490     53490     shanxi         114.0644       40.4408           78       176     2012      06        24        176              0.075583      23.167297       5.372953       0.247855       0.206500   -9999.000000       0.092100       0.843000
53490     53490     shanxi         114.0644       40.4408           78       176     2012      06        25        177              0.060625      20.045990       2.915609       0.279351       0.151000   -9999.000000       0.104500       0.491000
53490     53490     shanxi         114.0644       40.4408           78       176     2012      06        26        178              0.050292      21.764038       4.236657       0.267797       0.209000       0.205300       0.142500   -9999.000000
53490     53490     shanxi         114.0644       40.4408           78       176     2012      06        27        179              0.051042      18.797821       5.082791       0.278406       0.210000   -9999.000000       0.125300       1.000000
53490     53490     shanxi         114.0644       40.4408           78       176     2012      06        28        180              0.075625      18.249603       6.640111       0.275021       0.206000       0.258200       0.146600       1.000000
53490     53490     shanxi         114.0644       40.4408           78       176     2012      06        29        181              0.081875      16.444458       0.195266       0.294210       0.191500   -9999.000000       0.133400       1.000000
53490     53490     shanxi         114.0644       40.4408           78       176     2012      06        30        182              0.071375      20.077362       0.063088       0.270199       0.125000       0.330700       0.084900   -9999.000000
53490     53490     shanxi         114.0644       40.4408           78       176     2012      07        01        183              0.062542      22.216858       0.000000       0.251842       0.122000       0.141500       0.082200   -9999.000000
53490     53490     shanxi         114.0644       40.4408           78       176     2012      07        02        184              0.055375      22.293335       0.000000       0.236042       0.147000       0.152300   -9999.000000       0.442000
53490     53490     shanxi         114.0644       40.4408           78       176     2012      07        03        185              0.049000      22.248383       0.000000       0.225039       0.153000       0.019800       0.097400       0.542000
53490     53490     shanxi         114.0644       40.4408           78       176     2012      07        04        186              0.055833      23.765137       1.858103       0.215700       0.142500   -9999.000000       0.101600       0.360000
53490     53490     shanxi         114.0644       40.4408           78       176     2012      07        05        187              0.098750      23.563416       5.011298       0.222419       0.121000       0.139600       0.086300       0.830000
53490     53490     shanxi         114.0644       40.4408           78       176     2012      07        06        188              0.095333      22.598663       1.372672       0.247857   -9999.000000   -9999.000000       0.105900   -9999.000000
53490     53490     shanxi         114.0644       40.4408           78       176     2012      07        07        189              0.078125      23.286041       3.183930       0.245451   -9999.000000   -9999.000000       0.126400       0.675000
53490     53490     shanxi         114.0644       40.4408           78       176     2012      07        08        190              0.108333      21.605469      16.501633       0.253454       0.229000       0.125000       0.141900       1.000000
53490     53490     shanxi         114.0644       40.4408           78       176     2012      07        09        191              0.122750      21.988708       0.445430       0.283742       0.183000       0.140900       0.129100       0.933000
53490     53490     shanxi         114.0644       40.4408           78       176     2012      07        10        192              0.100750      23.198212       1.270156       0.278188       0.176000       0.163700       0.140100       0.877000
53490     53490     shanxi         114.0644       40.4408           78       176     2012      07        11        193              0.089208      22.391296       0.331680       0.264540       0.147000       0.152000       0.107200       0.597000
53490     53490     shanxi         114.0644       40.4408           78       176     2012      07        12        194              0.079917      22.443359       1.497745       0.249425       0.156000   -9999.000000       0.122200       0.785000
53490     53490     shanxi         114.0644       40.4408           78       176     2012      07        13        195              0.075375      21.757507       0.161019       0.250839       0.169000   -9999.000000       0.113100       0.588000
53490     53490     shanxi         114.0644       40.4408           78       176     2012      07        14        196              0.069208      21.125336       1.739738       0.244840       0.189000       0.122700       0.112300       0.683000
53490     53490     shanxi         114.0644       40.4408           78       176     2012      07        15        197              0.067458      20.709320       0.000000       0.249647       0.156500   -9999.000000       0.117200       0.597000
53490     53490     shanxi         114.0644       40.4408           78       176     2012      07        16        198              0.062417      22.511108       0.188937       0.232401       0.131000   -9999.000000       0.104000       0.373000
53490     53490     shanxi         114.0644       40.4408           78       176     2012      07        17        199              0.079667      23.526123       0.000000       0.221761       0.130000   -9999.000000       0.099800       0.442000
53490     53490     shanxi         114.0644       40.4408           78       176     2012      07        18        200              0.090458      24.034546       0.138365       0.211157       0.152000       0.270600       0.106000       0.501000
53490     53490     shanxi         114.0644       40.4408           78       176     2012      07        19        201              0.084708      24.486603       0.000000       0.204827       0.154000       0.076600       0.123900       0.484000
53490     53490     shanxi         114.0644       40.4408           78       176     2012      07        20        202              0.078826      24.867096       1.361727       0.200332       0.141000   -9999.000000       0.102800   -9999.000000
53490     53490     shanxi         114.0644       40.4408           78       176     2012      07        21        203              0.186957      25.687775      32.376648       0.194901       0.297000       0.105100       0.166200       1.000000
53490     53490     shanxi         114.0644       40.4408           78       176     2012      07        22        204              0.157708      18.050781       0.000000       0.316268       0.287000   -9999.000000       0.139500       0.885000
53490     53490     shanxi         114.0644       40.4408           78       176     2012      07        23        205              0.137833      20.529083       0.071213       0.277211       0.190000       0.245100       0.136500       0.760000
53490     53490     shanxi         114.0644       40.4408           78       176     2012      07        24        206              0.129833      21.759491       8.046478       0.262136   -9999.000000   -9999.000000       0.129800       0.423000
53490     53490     shanxi         114.0644       40.4408           78       176     2012      07        25        207              0.141250      23.478424       7.922719       0.271664       0.284500   -9999.000000       0.145000   -9999.000000
53490     53490     shanxi         114.0644       40.4408           78       176     2012      07        26        208              0.146250      21.034210       2.312512       0.296907       0.256000       0.255900       0.155400       0.998000
53490     53490     shanxi         114.0644       40.4408           78       176     2012      07        27        209              0.134792      22.087372       4.235968       0.287047       0.245000   -9999.000000       0.165000       0.836000
53490     53490     shanxi         114.0644       40.4408           78       176     2012      07        28        210              0.165417      23.185638       4.473204       0.282497       0.244000   -9999.000000       0.146000       0.920000
53490     53490     shanxi         114.0644       40.4408           78       176     2012      07        29        211              0.144500      22.607086       0.000000       0.284469       0.200000   -9999.000000       0.146200       0.639000
53490     53490     shanxi         114.0644       40.4408           78       176     2012      07        30        212              0.190458      22.036926      62.553093       0.269245   -9999.000000   -9999.000000       0.148200   -9999.000000
53490     53490     shanxi         114.0644       40.4408           78       176     2012      07        31        213              0.208292      18.270935       0.660523       0.332860       0.296500   -9999.000000       0.174700       1.000000
53490     53490     shanxi         114.0644       40.4408           78       176     2012      08        01        214              0.179875      17.988770       2.167945       0.319468       0.338000       0.126300       0.179800       1.000000
53490     53490     shanxi         114.0644       40.4408           78       176     2012      08        02        215              0.162375      19.660828       0.000000       0.303036       0.312000   -9999.000000       0.172600       1.000000
53490     53490     shanxi         114.0644       40.4408           78       176     2012      08        03        216              0.150208      23.010742       1.952840       0.289557       0.208000       0.231000       0.155300       0.839000
53490     53490     shanxi         114.0644       40.4408           78       176     2012      08        04        217              0.142833      22.718262       0.000000       0.280451       0.212000   -9999.000000       0.140400   -9999.000000
53490     53490     shanxi         114.0644       40.4408           78       176     2012      08        05        218              0.135708      23.987579       1.210990       0.270311       0.190000       0.314700       0.147900       0.626000
53490     53490     shanxi         114.0644       40.4408           78       176     2012      08        06        219              0.131583      23.050629       0.606586       0.264945       0.212500       0.203700       0.140300       0.805000
53490     53490     shanxi         114.0644       40.4408           78       176     2012      08        07        220              0.149792      24.154663       4.254436       0.261314       0.207000   -9999.000000   -9999.000000       0.570000
53490     53490     shanxi         114.0644       40.4408           78       176     2012      08        08        221              0.150208      23.545563       0.477268       0.271768       0.227000   -9999.000000       0.134800       0.695000
53490     53490     shanxi         114.0644       40.4408           78       176     2012      08        09        222              0.137917      21.439331       0.000000       0.267996       0.195000   -9999.000000       0.125300       0.478000
53490     53490     shanxi         114.0644       40.4408           78       176     2012      08        10        223              0.128792      22.382507       0.000000       0.253809       0.202000   -9999.000000       0.126100       0.560000
53490     53490     shanxi         114.0644       40.4408           78       176     2012      08        11        224              0.133333      22.361267       4.657894       0.247413       0.271000   -9999.000000       0.155000       0.861000
53490     53490     shanxi         114.0644       40.4408           78       176     2012      08        12        225              0.133917      17.008331       0.274645       0.272683       0.199000   -9999.000000       0.137300       0.521000
53490     53490     shanxi         114.0644       40.4408           78       176     2012      08        13        226              0.124667      19.873260       0.348552       0.256490       0.201000       0.160600       0.142100       0.462000
53490     53490     shanxi         114.0644       40.4408           78       176     2012      08        14        227              0.158042      19.904633      10.526563       0.249124       0.289000   -9999.000000       0.178300       0.781000
53490     53490     shanxi         114.0644       40.4408           78       176     2012      08        15        228              0.152833      17.506104       0.000000       0.288316       0.243000       0.197700       0.166500       0.866000
53490     53490     shanxi         114.0644       40.4408           78       176     2012      08        16        229              0.139542      18.294708       0.027379       0.270853       0.211500       0.132400   -9999.000000       0.753000
53490     53490     shanxi         114.0644       40.4408           78       176     2012      08        17        230              0.131917      20.919495       0.487210       0.259749       0.217500       0.351000       0.139200       0.652000
53490     53490     shanxi         114.0644       40.4408           78       176     2012      08        18        231              0.125417      20.890533       0.108592       0.257491       0.195000   -9999.000000       0.150000   -9999.000000
53490     53490     shanxi         114.0644       40.4408           78       176     2012      08        19        232              0.124042      18.420105       0.051144       0.254766       0.180500       0.111600       0.129900       0.594000
53490     53490     shanxi         114.0644       40.4408           78       176     2012      08        20        233              0.118125      21.243225       0.000000       0.244656       0.193000       0.038300       0.132200       0.528000
53490     53490     shanxi         114.0644       40.4408           78       176     2012      08        21        234              0.113292      16.456177       0.000000       0.240465       0.181500       0.146500       0.135900       0.471000
53490     53490     shanxi         114.0644       40.4408           78       176     2012      08        22        235              0.110542      15.345367       0.000000       0.233576       0.182000   -9999.000000       0.151000   -9999.000000
53490     53490     shanxi         114.0644       40.4408           78       176     2012      08        23        236              0.107792      17.222229       0.000000       0.228146       0.196000       0.213400       0.136200   -9999.000000
53490     53490     shanxi         114.0644       40.4408           78       176     2012      08        24        237              0.104458      18.916473       0.000000       0.222715       0.164000       0.190000       0.150500       0.455000
53490     53490     shanxi         114.0644       40.4408           78       176     2012      08        25        238              0.000000      19.679810       1.481625       0.217934       0.194000   -9999.000000       0.134000       0.670000
53490     53490     shanxi         114.0644       40.4408           78       176     2012      08        26        239              0.098042      20.867371       8.094314       0.220664       0.190000       0.076800       0.144000       0.546000
53490     53490     shanxi         114.0644       40.4408           78       176     2012      08        27        240              0.139792      21.307556      15.417789       0.218369       0.205000   -9999.000000       0.117300       0.838000
53490     53490     shanxi         114.0644       40.4408           78       176     2012      08        28        241              0.148542      19.052124       0.334645       0.284622       0.192000   -9999.000000       0.121400   -9999.000000
53490     53490     shanxi         114.0644       40.4408           78       176     2012      08        29        242              0.130833      19.629852       0.000000       0.266367       0.175000   -9999.000000       0.121300       0.550000
53490     53490     shanxi         114.0644       40.4408           78       176     2012      08        30        243              0.121417      21.319794       0.000000       0.250150       0.163500   -9999.000000       0.122300       0.507000
53490     53490     shanxi         114.0644       40.4408           78       176     2012      08        31        244              0.113417      21.801270       0.719361       0.240467       0.201000       0.076600       0.119800       0.431000
53490     53490     shanxi         114.0644       40.4408           78       176     2012      09        01        245              0.190583      19.375946      46.327415       0.243809       0.232000       0.190200       0.141500       1.000000
53490     53490     shanxi         114.0644       40.4408           78       176     2012      09        02        246              0.196708      14.630219       5.087952       0.322733       0.270000   -9999.000000   -9999.000000   -9999.000000
53490     53490     shanxi         114.0644       40.4408           78       176     2012      09        03        247              0.166583      13.135651       0.867828       0.312899       0.257000       0.173300       0.145200       0.881000
53490     53490     shanxi         114.0644       40.4408           78       176     2012      09        04        248              0.152125      10.204102       0.000000       0.296815       0.193500   -9999.000000       0.149300       0.667000
53490     53490     shanxi         114.0644       40.4408           78       176     2012      09        05        249              0.141875      13.602234       0.000000       0.283594       0.185000   -9999.000000       0.124100       0.846000
53490     53490     shanxi         114.0644       40.4408           78       176     2012      09        06        250              0.134083      15.681488       0.000000       0.275383       0.197000       0.098800       0.118900       0.549000
53490     53490     shanxi         114.0644       40.4408           78       176     2012      09        07        251              0.127500      16.313171       0.000000       0.270218       0.175000   -9999.000000       0.122300       0.576000
53490     53490     shanxi         114.0644       40.4408           78       176     2012      09        08        252              0.120875      16.412842       0.000000       0.266125       0.158000   -9999.000000       0.121600       0.504000
53490     53490     shanxi         114.0644       40.4408           78       176     2012      09        09        253              0.114000      17.636536       0.000000       0.260375       0.157000   -9999.000000       0.111800       0.528000
53490     53490     shanxi         114.0644       40.4408           78       176     2012      09        10        254              0.109833      18.517944       0.989042       0.254877       0.177000       0.192600       0.115400       0.576000
53490     53490     shanxi         114.0644       40.4408           78       176     2012      09        11        255              0.106458      16.234009       0.827608       0.259088       0.154000       0.215000       0.101400       0.597000
53490     53490     shanxi         114.0644       40.4408           78       176     2012      09        12        256              0.100917      14.204712       0.000000       0.259348       0.137000   -9999.000000       0.100600       0.683000
53490     53490     shanxi         114.0644       40.4408           78       176     2012      09        13        257              0.097625      10.544617       1.524398       0.255528       0.170000       0.148400       0.117700       0.747000
53490     53490     shanxi         114.0644       40.4408           78       176     2012      09        14        258              0.094958       9.859009       0.171660       0.261575       0.147000   -9999.000000       0.101200       0.395000
53490     53490     shanxi         114.0644       40.4408           78       176     2012      09        15        259              0.091542      11.821869       0.000000       0.255043       0.148000       0.246000       0.105700       0.411000
53490     53490     shanxi         114.0644       40.4408           78       176     2012      09        16        260              0.087167      13.262177       0.578302       0.249758       0.142000       0.116500       0.102700   -9999.000000
53490     53490     shanxi         114.0644       40.4408           78       176     2012      09        17        261              0.084083      13.178955       0.000000       0.247056       0.145000   -9999.000000       0.096800       0.406000
53490     53490     shanxi         114.0644       40.4408           78       176     2012      09        18        262              0.081917      13.684418       2.860227       0.245169       0.130500       0.060200       0.099900       0.424000
53490     53490     shanxi         114.0644       40.4408           78       176     2012      09        19        263              0.078917      14.207397       0.245274       0.241733       0.130000   -9999.000000       0.112900       0.474000
53490     53490     shanxi         114.0644       40.4408           78       176     2012      09        20        264              0.077292      14.389435       0.092854       0.241786       0.125000   -9999.000000       0.101000       0.536000
53490     53490     shanxi         114.0644       40.4408           78       176     2012      09        21        265              0.075417      15.763245       1.037563       0.238945   -9999.000000   -9999.000000       0.110000   -9999.000000
53490     53490     shanxi         114.0644       40.4408           78       176     2012      09        22        266              0.075458      13.753265       0.000000       0.247748       0.130000   -9999.000000       0.095400       0.444000
53490     53490     shanxi         114.0644       40.4408           78       176     2012      09        23        267              0.073750      15.743195       0.322000       0.240958       0.118000       0.055300       0.107900       0.593000
53490     53490     shanxi         114.0644       40.4408           78       176     2012      09        24        268              0.074167      14.834717       5.794973       0.239348       0.134000       0.147100       0.100200       0.507000
53490     53490     shanxi         114.0644       40.4408           78       176     2012      09        25        269              0.156167      14.191956       8.097237       0.258961       0.212000   -9999.000000       0.116700       0.900000
53490     53490     shanxi         114.0644       40.4408           78       176     2012      09        26        270              0.152958      10.402435       5.403197       0.292540       0.179500   -9999.000000       0.127000   -9999.000000
53490     53490     shanxi         114.0644       40.4408           78       176     2012      09        27        271              0.158929      13.003632       0.513987       0.281922   -9999.000000   -9999.000000       0.150400       0.945000
53490     53490     shanxi         114.0644       40.4408           78       176     2012      09        28        272              0.129067       8.491241       0.246064       0.279762       0.186000   -9999.000000       0.122700       0.737000
53490     53490     shanxi         114.0644       40.4408           78       176     2012      09        29        273              0.119833       7.888855       0.000000       0.268067       0.161000   -9999.000000       0.122300       0.633000
53490     53490     shanxi         114.0644       40.4408           78       176     2012      09        30        274              0.110875       9.000336       0.000000       0.261265       0.144000   -9999.000000       0.112200       0.475000
53490     53490     shanxi         114.0644       40.4408           78       176     2012      10        01        275              0.102833      10.715881       0.000000       0.257416       0.112000       0.318800       0.087400   -9999.000000
53490     53490     shanxi         114.0644       40.4408           78       176     2012      10        02        276              0.095375      12.528839       0.069144       0.252880       0.120000   -9999.000000       0.102200       0.406000
53490     53490     shanxi         114.0644       40.4408           78       176     2012      10        03        277              0.088000      12.183075       0.400375       0.249031       0.134000       0.050900       0.082900       0.490000
53490     53490     shanxi         114.0644       40.4408           78       176     2012      10        04        278              0.085958      10.108795       0.334054       0.245792       0.132000       0.171800       0.094300       0.406000
53490     53490     shanxi         114.0644       40.4408           78       176     2012      10        05        279              0.085417       8.221130       0.035358       0.249786       0.132000   -9999.000000       0.101600       0.502000
53490     53490     shanxi         114.0644       40.4408           78       176     2012      10        06        280              0.082917       9.534912       0.000000       0.247003       0.132000       0.051900       0.101400       0.251000
53490     53490     shanxi         114.0644       40.4408           78       176     2012      10        07        281              0.080458      10.566040       0.000000       0.243876       0.117000       0.031100       0.089000       0.474000
53490     53490     shanxi         114.0644       40.4408           78       176     2012      10        08        282              0.080333      10.852264       1.516705       0.242536       0.150000   -9999.000000       0.101300       0.467000
53490     53490     shanxi         114.0644       40.4408           78       176     2012      10        09        283              0.080375      11.570557       0.062369       0.247583       0.129000       0.256200       0.090100       0.433000
53490     53490     shanxi         114.0644       40.4408           78       176     2012      10        10        284              0.079458       6.032501       0.000000       0.242352       0.130000   -9999.000000       0.087100       0.395000
53490     53490     shanxi         114.0644       40.4408           78       176     2012      10        11        285              0.077958       7.367767       0.154562       0.243982       0.108000       0.183800       0.085500       0.292000
53490     53490     shanxi         114.0644       40.4408           78       176     2012      10        12        286              0.076250       9.656433       0.000000       0.241856       0.094000       0.116000       0.082800       0.383000
53490     53490     shanxi         114.0644       40.4408           78       176     2012      10        13        287              0.074042       8.963745       0.000000       0.235375   -9999.000000   -9999.000000       0.085600       0.359000
53490     53490     shanxi         114.0644       40.4408           78       176     2012      10        14        288              0.073375       5.720428       0.231613       0.223373       0.109000   -9999.000000       0.091300       0.411000
53490     53490     shanxi         114.0644       40.4408           78       176     2012      10        15        289              0.081958       6.976837      14.410516       0.234919       0.098000   -9999.000000       0.080400   -9999.000000
53490     53490     shanxi         114.0644       40.4408           78       176     2012      10        16        290              0.125292       8.409363       1.889974       0.263821   -9999.000000   -9999.000000       0.135400       0.926000
53490     53490     shanxi         114.0644       40.4408           78       176     2012      10        17        291              0.110750       3.170288       0.000000       0.261447       0.168000       0.247400   -9999.000000       0.598000
53490     53490     shanxi         114.0644       40.4408           78       176     2012      10        18        292              0.103500       3.653625       1.182471       0.261099   -9999.000000   -9999.000000       0.081200       0.571000
53490     53490     shanxi         114.0644       40.4408           78       176     2012      10        19        293              0.097667       5.209869       0.000000       0.261841   -9999.000000       0.113300       0.090800       0.546000
53490     53490     shanxi         114.0644       40.4408           78       176     2012      10        20        294              0.092667       6.874939       0.630361       0.261263       0.114500   -9999.000000       0.078200   -9999.000000
53490     53490     shanxi         114.0644       40.4408           78       176     2012      10        21        295              0.138083       8.000061      14.222479       0.260270   -9999.000000   -9999.000000       0.097900       0.977000
53490     53490     shanxi         114.0644       40.4408           78       176     2012      10        22        296              0.138833       4.369507       0.044351       0.296864   -9999.000000   -9999.000000       0.140100       0.756000
53490     53490     shanxi         114.0644       40.4408           78       176     2012      10        23        297              0.124458       3.903900       0.371870       0.290272   -9999.000000   -9999.000000       0.097500       0.806000
53490     53490     shanxi         114.0644       40.4408           78       176     2012      10        24        298              0.114083       6.059509       0.000000       0.278005   -9999.000000       0.099000       0.081500       0.624000
53490     53490     shanxi         114.0644       40.4408           78       176     2012      10        25        299              0.000000       6.551910       0.000000       0.269481       0.123000   -9999.000000       0.087100   -9999.000000
53490     53490     shanxi         114.0644       40.4408           78       176     2012      10        26        300              0.103083       7.148621       0.026754       0.265839       0.128000   -9999.000000       0.084800       0.525000
53490     53490     shanxi         114.0644       40.4408           78       176     2012      10        27        301              0.098083       6.098145       0.000000       0.265695       0.113000   -9999.000000       0.086900       0.466000
53490     53490     shanxi         114.0644       40.4408           78       176     2012      10        28        302              0.000000       4.972473       0.362445       0.243804       0.096000   -9999.000000       0.085000       0.363000
53490     53490     shanxi         114.0644       40.4408           78       176     2012      10        29        303              0.088042       4.866089       0.270431       0.252066   -9999.000000       0.110300       0.063800       0.269000
53490     53490     shanxi         114.0644       40.4408           78       176     2012      10        30        304              0.085333       1.627716       1.804631       0.205207   -9999.000000       0.130300       0.066000   -9999.000000
53490     53490     shanxi         114.0644       40.4408           78       176     2012      10        31        305              0.084000       0.655121       0.000000       0.187734       0.097000   -9999.000000       0.068200       0.237000
53490     53490     shanxi         114.0644       40.4408           78       176     2012      11        01        306              0.083708       1.156189       0.000000       0.197796       0.096000       0.129900       0.066600       0.424000
53490     53490     shanxi         114.0644       40.4408           78       176     2012      11        02        307              0.082583       2.438477       1.068861       0.222775       0.096000   -9999.000000       0.073200       0.292000
53490     53490     shanxi         114.0644       40.4408           78       176     2012      11        03        308              0.089833       4.565979       3.284824       0.245436   -9999.000000   -9999.000000   -9999.000000       0.367000
53490     53490     shanxi         114.0644       40.4408           78       176     2012      11        04        309              0.081167      -0.748657       0.000000       0.183683   -9999.000000   -9999.000000       0.058400       0.320000
53490     53490     shanxi         114.0644       40.4408           78       176     2012      11        05        310              0.081542      -3.514832       0.203453       0.115244   -9999.000000   -9999.000000       0.053200       0.328000
53490     53490     shanxi         114.0644       40.4408           78       176     2012      11        06        311              0.095333      -3.270233       0.825960       0.120377       0.112000       0.151700       0.053100       0.311000
53490     53490     shanxi         114.0644       40.4408           78       176     2012      11        07        312              0.093917      -0.652283       0.248139       0.156900   -9999.000000   -9999.000000       0.052800       0.306000
53490     53490     shanxi         114.0644       40.4408           78       176     2012      11        08        313              0.095292      -1.371063       0.000000       0.150249   -9999.000000   -9999.000000   -9999.000000       0.348000
53490     53490     shanxi         114.0644       40.4408           78       176     2012      11        09        314              0.103542      -0.467499       1.784411       0.162158   -9999.000000       0.153500       0.049700       0.427000
53490     53490     shanxi         114.0644       40.4408           78       176     2012      11        10        315              0.129167       0.357025       1.213060       0.173908   -9999.000000   -9999.000000       0.041300       0.378000
53490     53490     shanxi         114.0644       40.4408           78       176     2012      11        11        316              0.116667      -2.625214       0.000000       0.123138   -9999.000000   -9999.000000       0.050600       0.277000
53490     53490     shanxi         114.0644       40.4408           78       176     2012      11        12        317              0.086750      -3.885437       0.950240       0.112742   -9999.000000   -9999.000000       0.036500       0.276000
53490     53490     shanxi         114.0644       40.4408           78       176     2012      11        13        318              0.000000      -3.733032       0.000000       0.115377   -9999.000000       0.149000       0.042100   -9999.000000
53490     53490     shanxi         114.0644       40.4408           78       176     2012      11        14        319              0.066042      -5.220123       0.000000       0.108287   -9999.000000       0.058500       0.042900       0.342000
53490     53490     shanxi         114.0644       40.4408           78       176     2012      11        15        320              0.068458      -4.960388       2.951112       0.111153   -9999.000000   -9999.000000       0.034700       0.313000
53490     53490     shanxi         114.0644       40.4408           78       176     2012      11        16        321              0.069250      -1.118195       0.000000       0.134542   -9999.000000   -9999.000000       0.036900       0.186000
53490     53490     shanxi         114.0644       40.4408           78       176     2012      11        17        322              0.000000      -3.024475       0.000000       0.117608   -9999.000000   -9999.000000       0.030300       0.305000
53490     53490     shanxi         114.0644       40.4408           78       176     2012      11        18        323              0.068375      -2.931122       0.000000       0.125577   -9999.000000   -9999.000000       0.040900   -9999.000000
53490     53490     shanxi         114.0644       40.4408           78       176     2012      11        19        324              0.065708      -3.855621       0.000000       0.123757   -9999.000000       0.132600       0.039300       0.347000
53490     53490     shanxi         114.0644       40.4408           78       176     2012      11        20        325              0.066167      -3.657715       0.000000       0.118852   -9999.000000   -9999.000000       0.039100       0.295000
53490     53490     shanxi         114.0644       40.4408           78       176     2012      11        21        326              0.072250      -2.858795       0.000000       0.124014   -9999.000000   -9999.000000       0.031200       0.366000
53490     53490     shanxi         114.0644       40.4408           78       176     2012      11        22        327              0.066750      -0.852081       0.000000       0.150842   -9999.000000   -9999.000000       0.032700       0.272000
53490     53490     shanxi         114.0644       40.4408           78       176     2012      11        23        328              0.062000      -6.980499       0.000000       0.106257   -9999.000000       0.097200       0.031500   -9999.000000
53490     53490     shanxi         114.0644       40.4408           78       176     2012      11        24        329              0.063833      -6.910156       0.000000       0.099377   -9999.000000       0.119200       0.033500       0.246000
53490     53490     shanxi         114.0644       40.4408           78       176     2012      11        25        330              0.063333      -4.191986       0.000000       0.107503   -9999.000000       0.136500       0.034800       0.220000
53490     53490     shanxi         114.0644       40.4408           78       176     2012      11        26        331              0.061500      -6.463654       0.000000       0.101579   -9999.000000   -9999.000000   -9999.000000       0.198000
53490     53490     shanxi         114.0644       40.4408           78       176     2012      11        27        332              0.063292      -5.935486       0.048434       0.099875   -9999.000000   -9999.000000       0.031500       0.254000
53490     53490     shanxi         114.0644       40.4408           78       176     2012      11        28        333              0.061083      -5.395630       0.000000       0.110400   -9999.000000       0.094900       0.033700   -9999.000000
53490     53490     shanxi         114.0644       40.4408           78       176     2012      11        29        334              0.060167      -9.258575       0.000000       0.097619   -9999.000000       0.026700       0.026800       0.169000
53490     53490     shanxi         114.0644       40.4408           78       176     2012      11        30        335              0.059833      -9.906586       0.000000       0.095440   -9999.000000   -9999.000000       0.032300       0.215000
53490     53490     shanxi         114.0644       40.4408           78       176     2012      12        01        336              0.059208      -9.998505       0.000000       0.095087   -9999.000000   -9999.000000   -9999.000000       0.162000
53490     53490     shanxi         114.0644       40.4408           78       176     2012      12        02        337              0.059667      -8.894440       0.052234       0.096122   -9999.000000   -9999.000000       0.026800       0.184000
53490     53490     shanxi         114.0644       40.4408           78       176     2012      12        03        338              0.059542      -7.032196       0.000000       0.097567   -9999.000000   -9999.000000       0.028700       0.173000
53490     53490     shanxi         114.0644       40.4408           78       176     2012      12        04        339              0.059208     -10.318512       0.000000       0.095665   -9999.000000   -9999.000000       0.026200       0.245000
53490     53490     shanxi         114.0644       40.4408           78       176     2012      12        05        340              0.057833      -9.751801       0.000000       0.095535   -9999.000000   -9999.000000       0.029700       0.139000
53490     53490     shanxi         114.0644       40.4408           78       176     2012      12        06        341              0.058417     -13.188599       0.000000       0.094357   -9999.000000   -9999.000000       0.028200       0.080000
53490     53490     shanxi         114.0644       40.4408           78       176     2012      12        07        342              0.057458     -11.238403       0.000000       0.094827   -9999.000000   -9999.000000       0.030000       0.076000
53490     53490     shanxi         114.0644       40.4408           78       176     2012      12        08        343              0.056167     -14.570404       0.000000       0.093164   -9999.000000   -9999.000000       0.025700       0.124000
53490     53490     shanxi         114.0644       40.4408           78       176     2012      12        09        344              0.056208     -16.556030       0.000000       0.090692   -9999.000000   -9999.000000       0.026800       0.212000
53490     53490     shanxi         114.0644       40.4408           78       176     2012      12        10        345              0.056958     -12.891022       0.000000       0.090900   -9999.000000   -9999.000000       0.027100       0.115000
53490     53490     shanxi         114.0644       40.4408           78       176     2012      12        11        346              0.057458     -11.736267       0.000000       0.091466   -9999.000000   -9999.000000       0.025400       0.136000
53490     53490     shanxi         114.0644       40.4408           78       176     2012      12        12        347              0.057125     -11.275970       0.000000       0.091612   -9999.000000   -9999.000000       0.024900   -9999.000000
53490     53490     shanxi         114.0644       40.4408           78       176     2012      12        13        348              0.058417     -10.951324       0.843096       0.091979   -9999.000000   -9999.000000       0.025300       0.153000
53490     53490     shanxi         114.0644       40.4408           78       176     2012      12        14        349              0.059783      -9.507050       0.210435       0.092499   -9999.000000   -9999.000000       0.025800       0.151000
53490     53490     shanxi         114.0644       40.4408           78       176     2012      12        15        350              0.000000      -8.114136       0.000000       0.094066   -9999.000000   -9999.000000       0.024400       0.156000
53490     53490     shanxi         114.0644       40.4408           78       176     2012      12        16        351              0.060042      -6.728668       0.000000       0.098652   -9999.000000   -9999.000000       0.023900       0.167000
53490     53490     shanxi         114.0644       40.4408           78       176     2012      12        17        352              0.057875      -8.058746       0.000000       0.095541   -9999.000000       0.108900       0.022100   -9999.000000
53490     53490     shanxi         114.0644       40.4408           78       176     2012      12        18        353              0.056750     -12.959412       0.000000       0.092919   -9999.000000   -9999.000000   -9999.000000       0.178000
53490     53490     shanxi         114.0644       40.4408           78       176     2012      12        19        354              0.057833     -11.342560       0.000000       0.092198   -9999.000000       0.040500       0.021900       0.184000
53490     53490     shanxi         114.0644       40.4408           78       176     2012      12        20        355              0.000000      -9.887054       0.652180       0.092494   -9999.000000   -9999.000000       0.022300       0.086000
53490     53490     shanxi         114.0644       40.4408           78       176     2012      12        21        356              0.057583      -9.498627       0.000000       0.092897   -9999.000000   -9999.000000       0.022500       0.140000
53490     53490     shanxi         114.0644       40.4408           78       176     2012      12        22        357              0.055958     -12.033234       0.000000       0.092656   -9999.000000   -9999.000000       0.024900   -9999.000000
53490     53490     shanxi         114.0644       40.4408           78       176     2012      12        23        358              0.055000     -15.315979       0.000000       0.091534   -9999.000000   -9999.000000   -9999.000000       0.123000
53490     53490     shanxi         114.0644       40.4408           78       176     2012      12        24        359              0.054667     -15.878143       0.000000       0.089156   -9999.000000   -9999.000000       0.024800       0.139000
53490     53490     shanxi         114.0644       40.4408           78       176     2012      12        25        360              0.055000     -15.690430       0.000000       0.089486   -9999.000000   -9999.000000       0.025600       0.084000
53490     53490     shanxi         114.0644       40.4408           78       176     2012      12        26        361              0.000000     -14.901520       0.000000       0.089341   -9999.000000   -9999.000000       0.024500       0.177000
53490     53490     shanxi         114.0644       40.4408           78       176     2012      12        27        362              0.057455     -11.914337       0.000000       0.089948   -9999.000000   -9999.000000       0.026800   -9999.000000
53490     53490     shanxi         114.0644       40.4408           78       176     2012      12        28        363              0.055000      -9.833771       1.131237       0.090507   -9999.000000   -9999.000000       0.024000       0.137000
53490     53490     shanxi         114.0644       40.4408           78       176     2012      12        29        364              0.000000     -10.695068       0.000000       0.090857   -9999.000000   -9999.000000   -9999.000000       0.016000
53490     53490     shanxi         114.0644       40.4408           78       176     2012      12        30        365              0.000000     -11.958496       0.000000       0.090747   -9999.000000   -9999.000000       0.023300       0.103000
53490     53490     shanxi         114.0644       40.4408           78       176     2012      12        31        366              0.055267     -11.563110       0.000000       0.090884   -9999.000000   -9999.000000       0.021800   -9999.000000
