# Supplementary material for: Research on Fusing Multisatellite Soil Moisture Data Based on Bayesian Model Averaging
Source: Hindawi journal article supplement (doi:10.1155/2018/9310838), 2018-06-25
Supplement: f1 [file 9310838.f1.zip › 2012_sm00-10cm_daily_ZDB_ZHY_53505_366days_allin.txt]

53505     53505     neimenggu      105.6667       37.8833           88       143     2012      01        01        001              0.000000   -9999.000000      10.028395   -9999.000000   -9999.000000   -9999.000000       0.060700   -9999.000000
53505     53505     neimenggu      105.6667       37.8833           88       143     2012      01        02        002              0.000000      -6.388031       0.000000       0.064585   -9999.000000   -9999.000000       0.066700       0.045000
53505     53505     neimenggu      105.6667       37.8833           88       143     2012      01        03        003              0.000000      -8.240601       8.064211       0.064780   -9999.000000   -9999.000000       0.065700       0.049000
53505     53505     neimenggu      105.6667       37.8833           88       143     2012      01        04        004              0.000000     -10.063324       0.280551       0.062985   -9999.000000   -9999.000000       0.065600       0.058000
53505     53505     neimenggu      105.6667       37.8833           88       143     2012      01        05        005              0.000000      -9.420258       0.000000       0.062739   -9999.000000   -9999.000000       0.062000       0.120000
53505     53505     neimenggu      105.6667       37.8833           88       143     2012      01        06        006              0.000000      -8.728119       0.000000       0.064364   -9999.000000   -9999.000000       0.060500       0.085000
53505     53505     neimenggu      105.6667       37.8833           88       143     2012      01        07        007              0.000000      -8.052185       0.000000       0.065391   -9999.000000   -9999.000000   -9999.000000   -9999.000000
53505     53505     neimenggu      105.6667       37.8833           88       143     2012      01        08        008              0.000000      -7.576202       0.000000       0.066745   -9999.000000   -9999.000000       0.067700       0.043000
53505     53505     neimenggu      105.6667       37.8833           88       143     2012      01        09        009              0.000000      -7.660919       0.000000       0.067025   -9999.000000   -9999.000000   -9999.000000       0.037000
53505     53505     neimenggu      105.6667       37.8833           88       143     2012      01        10        010              0.000000      -7.102295       0.000000       0.069337   -9999.000000   -9999.000000   -9999.000000       0.138000
53505     53505     neimenggu      105.6667       37.8833           88       143     2012      01        11        011              0.000000      -7.960876       0.000000       0.068146   -9999.000000   -9999.000000       0.063500       0.093000
53505     53505     neimenggu      105.6667       37.8833           88       143     2012      01        12        012              0.000000      -8.063568       0.773736       0.064763   -9999.000000   -9999.000000       0.061700   -9999.000000
53505     53505     neimenggu      105.6667       37.8833           88       143     2012      01        13        013              0.000000      -7.590027       0.000000       0.067439   -9999.000000   -9999.000000   -9999.000000       0.044000
53505     53505     neimenggu      105.6667       37.8833           88       143     2012      01        14        014              0.000000      -7.248840       0.000000       0.070424   -9999.000000   -9999.000000       0.062000       0.097000
53505     53505     neimenggu      105.6667       37.8833           88       143     2012      01        15        015              0.000000      -8.837585       0.000000       0.064534   -9999.000000   -9999.000000       0.062900       0.151000
53505     53505     neimenggu      105.6667       37.8833           88       143     2012      01        16        016              0.000000      -7.013336       0.000000       0.070587   -9999.000000   -9999.000000       0.055900       0.096000
53505     53505     neimenggu      105.6667       37.8833           88       143     2012      01        17        017              0.000000      -4.697296       0.000000       0.084865   -9999.000000   -9999.000000       0.061400   -9999.000000
53505     53505     neimenggu      105.6667       37.8833           88       143     2012      01        18        018              0.000000      -5.395111       0.000000       0.080258   -9999.000000   -9999.000000       0.059000       0.029000
53505     53505     neimenggu      105.6667       37.8833           88       143     2012      01        19        019              0.000000      -4.644562       0.000000       0.080554   -9999.000000       0.042100       0.053100       0.072000
53505     53505     neimenggu      105.6667       37.8833           88       143     2012      01        20        020              0.000000      -6.373108       0.000000       0.069680   -9999.000000   -9999.000000       0.044500       0.009000
53505     53505     neimenggu      105.6667       37.8833           88       143     2012      01        21        021              0.000000     -10.335327       0.000000       0.065568   -9999.000000   -9999.000000       0.042900   -9999.000000
53505     53505     neimenggu      105.6667       37.8833           88       143     2012      01        22        022              0.000000     -13.382019       0.000000       0.062658   -9999.000000   -9999.000000       0.042800   -9999.000000
53505     53505     neimenggu      105.6667       37.8833           88       143     2012      01        23        023              0.000000     -13.999023       0.000000       0.061499   -9999.000000   -9999.000000       0.041400       0.021000
53505     53505     neimenggu      105.6667       37.8833           88       143     2012      01        24        024              0.000000     -14.176483       0.000000       0.061228   -9999.000000   -9999.000000   -9999.000000       0.030000
53505     53505     neimenggu      105.6667       37.8833           88       143     2012      01        25        025              0.000000     -13.383911       0.000000       0.060940   -9999.000000   -9999.000000       0.043500       0.006000
53505     53505     neimenggu      105.6667       37.8833           88       143     2012      01        26        026              0.000000     -11.009979       0.000000       0.061259   -9999.000000   -9999.000000       0.040700       0.022000
53505     53505     neimenggu      105.6667       37.8833           88       143     2012      01        27        027              0.000000      -9.984589       0.000000       0.061591   -9999.000000   -9999.000000       0.039700   -9999.000000
53505     53505     neimenggu      105.6667       37.8833           88       143     2012      01        28        028              0.000000      -8.346954       0.000000       0.062133   -9999.000000   -9999.000000       0.041300       0.107000
53505     53505     neimenggu      105.6667       37.8833           88       143     2012      01        29        029              0.000000      -8.367645       0.000000       0.062366   -9999.000000   -9999.000000       0.039600       0.076000
53505     53505     neimenggu      105.6667       37.8833           88       143     2012      01        30        030              0.000000      -7.006012       0.000000       0.067457   -9999.000000   -9999.000000   -9999.000000       0.089000
53505     53505     neimenggu      105.6667       37.8833           88       143     2012      01        31        031              0.000000      -4.460144       0.000000       0.079799   -9999.000000   -9999.000000       0.044700       0.023000
53505     53505     neimenggu      105.6667       37.8833           88       143     2012      02        01        032              0.000000      -3.796051       0.000000       0.096688   -9999.000000   -9999.000000       0.046400       0.110000
53505     53505     neimenggu      105.6667       37.8833           88       143     2012      02        02        033              0.000000      -8.840485       0.000000       0.065375   -9999.000000   -9999.000000       0.048900       0.038000
53505     53505     neimenggu      105.6667       37.8833           88       143     2012      02        03        034              0.000000      -8.201355       0.000000       0.065457   -9999.000000   -9999.000000       0.047000       0.135000
53505     53505     neimenggu      105.6667       37.8833           88       143     2012      02        04        035              0.000000      -6.169830       0.000000       0.074256   -9999.000000   -9999.000000   -9999.000000       0.070000
53505     53505     neimenggu      105.6667       37.8833           88       143     2012      02        05        036              0.000000      -3.600555       0.000000       0.091139   -9999.000000   -9999.000000       0.053100   -9999.000000
53505     53505     neimenggu      105.6667       37.8833           88       143     2012      02        06        037              0.000000      -3.312836       0.000000       0.096708   -9999.000000   -9999.000000       0.053800       0.095000
53505     53505     neimenggu      105.6667       37.8833           88       143     2012      02        07        038              0.000000      -8.778046       0.000000       0.066123   -9999.000000   -9999.000000       0.056700       0.069000
53505     53505     neimenggu      105.6667       37.8833           88       143     2012      02        08        039              0.000000      -9.754272       0.000000       0.063011   -9999.000000   -9999.000000       0.058900       0.108000
53505     53505     neimenggu      105.6667       37.8833           88       143     2012      02        09        040              0.000000     -10.355743       0.000000       0.063150   -9999.000000   -9999.000000       0.055500       0.083000
53505     53505     neimenggu      105.6667       37.8833           88       143     2012      02        10        041              0.000000      -8.869568       0.000000       0.063609   -9999.000000   -9999.000000   -9999.000000   -9999.000000
53505     53505     neimenggu      105.6667       37.8833           88       143     2012      02        11        042              0.000000      -6.537140       0.000000       0.074775   -9999.000000   -9999.000000       0.059600       0.098000
53505     53505     neimenggu      105.6667       37.8833           88       143     2012      02        12        043              0.000000      -4.330566       0.000000       0.086216       0.094000   -9999.000000   -9999.000000       0.094000
53505     53505     neimenggu      105.6667       37.8833           88       143     2012      02        13        044              0.000000      -2.184998       0.000000       0.101988       0.090000   -9999.000000       0.059300       0.145000
53505     53505     neimenggu      105.6667       37.8833           88       143     2012      02        14        045              0.000000      -0.505890       0.000000       0.114155   -9999.000000   -9999.000000   -9999.000000       0.072000
53505     53505     neimenggu      105.6667       37.8833           88       143     2012      02        15        046              0.000000      -2.421539       0.000000       0.102099   -9999.000000   -9999.000000       0.060500   -9999.000000
53505     53505     neimenggu      105.6667       37.8833           88       143     2012      02        16        047              0.000000      -3.883606       0.000000       0.093916   -9999.000000   -9999.000000   -9999.000000       0.135000
53505     53505     neimenggu      105.6667       37.8833           88       143     2012      02        17        048              0.000000      -5.106201       0.000000       0.085733   -9999.000000   -9999.000000       0.064800       0.136000
53505     53505     neimenggu      105.6667       37.8833           88       143     2012      02        18        049              0.000000      -6.095245       0.632214       0.078725   -9999.000000   -9999.000000       0.065500       0.185000
53505     53505     neimenggu      105.6667       37.8833           88       143     2012      02        19        050              0.000000      -5.151886       0.000000       0.083347       0.089000   -9999.000000       0.063300       0.069000
53505     53505     neimenggu      105.6667       37.8833           88       143     2012      02        20        051              0.000000      -2.488037       0.000000       0.100468   -9999.000000   -9999.000000       0.059500   -9999.000000
53505     53505     neimenggu      105.6667       37.8833           88       143     2012      02        21        052              0.000000       0.082703       0.000000       0.116324       0.089000   -9999.000000   -9999.000000       0.051000
53505     53505     neimenggu      105.6667       37.8833           88       143     2012      02        22        053              0.000000       1.992096       0.000000       0.129201       0.083000   -9999.000000       0.064000       0.051000
53505     53505     neimenggu      105.6667       37.8833           88       143     2012      02        23        054              0.000000       1.246582       0.000000       0.127042   -9999.000000   -9999.000000       0.064100       0.170000
53505     53505     neimenggu      105.6667       37.8833           88       143     2012      02        24        055              0.000000       0.497894       0.000000       0.120599   -9999.000000   -9999.000000       0.068000       0.131000
53505     53505     neimenggu      105.6667       37.8833           88       143     2012      02        25        056              0.000000      -2.153351       0.000000       0.101805   -9999.000000   -9999.000000       0.072000   -9999.000000
53505     53505     neimenggu      105.6667       37.8833           88       143     2012      02        26        057              0.000000      -5.756165       0.000000       0.072866   -9999.000000   -9999.000000       0.063200       0.060000
53505     53505     neimenggu      105.6667       37.8833           88       143     2012      02        27        058              0.000000      -2.207764       0.000000       0.100807   -9999.000000   -9999.000000   -9999.000000       0.135000
53505     53505     neimenggu      105.6667       37.8833           88       143     2012      02        28        059              0.000000      -0.255585       0.578120       0.113828       0.090000   -9999.000000   -9999.000000       0.022000
53505     53505     neimenggu      105.6667       37.8833           88       143     2012      02        29        060              0.000000   -9999.000000       0.000000   -9999.000000       0.094000   -9999.000000   -9999.000000   -9999.000000
53505     53505     neimenggu      105.6667       37.8833           88       143     2012      03        01        061              0.000000       1.634857       0.000000       0.123853   -9999.000000   -9999.000000       0.063500       0.113000
53505     53505     neimenggu      105.6667       37.8833           88       143     2012      03        02        062              0.000000       2.181244       0.150037       0.129545   -9999.000000   -9999.000000       0.100300       0.220000
53505     53505     neimenggu      105.6667       37.8833           88       143     2012      03        03        063              0.000000       1.462555       0.300780       0.127075       0.091000   -9999.000000       0.065000       0.165000
53505     53505     neimenggu      105.6667       37.8833           88       143     2012      03        04        064              0.000000       1.651276       0.426597       0.133978   -9999.000000   -9999.000000       0.059400       0.092000
53505     53505     neimenggu      105.6667       37.8833           88       143     2012      03        05        065              0.000000       0.237030       0.512448       0.120300       0.087000   -9999.000000       0.062200   -9999.000000
53505     53505     neimenggu      105.6667       37.8833           88       143     2012      03        06        066              0.000000      -0.511566       0.000000       0.117914   -9999.000000   -9999.000000       0.063300       0.020000
53505     53505     neimenggu      105.6667       37.8833           88       143     2012      03        07        067              0.000000       0.648010       0.000000       0.120553   -9999.000000   -9999.000000       0.062000       0.043000
53505     53505     neimenggu      105.6667       37.8833           88       143     2012      03        08        068              0.000000       0.741394       0.000000       0.123767   -9999.000000   -9999.000000       0.064500       0.106000
53505     53505     neimenggu      105.6667       37.8833           88       143     2012      03        09        069              0.000000       0.116852       0.334340       0.118483       0.090000   -9999.000000   -9999.000000       0.040000
53505     53505     neimenggu      105.6667       37.8833           88       143     2012      03        10        070              0.000000       1.953735       0.000000       0.129101       0.085000   -9999.000000       0.066900   -9999.000000
53505     53505     neimenggu      105.6667       37.8833           88       143     2012      03        11        071              0.000000       0.969452       0.000000       0.124220       0.081000   -9999.000000       0.063400       0.116000
53505     53505     neimenggu      105.6667       37.8833           88       143     2012      03        12        072              0.000000       0.746582       0.093711       0.120331   -9999.000000   -9999.000000       0.064800       0.070000
53505     53505     neimenggu      105.6667       37.8833           88       143     2012      03        13        073              0.000000       2.663391       0.441498       0.129366       0.086000   -9999.000000       0.062500       0.138000
53505     53505     neimenggu      105.6667       37.8833           88       143     2012      03        14        074              0.000000       4.441498       0.049037       0.140034       0.084000   -9999.000000   -9999.000000       0.065000
53505     53505     neimenggu      105.6667       37.8833           88       143     2012      03        15        075              0.000000       6.405853       0.000000       0.158941       0.081000   -9999.000000   -9999.000000   -9999.000000
53505     53505     neimenggu      105.6667       37.8833           88       143     2012      03        16        076              0.000000       6.164032       0.700558       0.152506       0.088000   -9999.000000       0.066400       0.117000
53505     53505     neimenggu      105.6667       37.8833           88       143     2012      03        17        077              0.000000       6.265503       0.232453       0.149987   -9999.000000   -9999.000000       0.071800       0.102000
53505     53505     neimenggu      105.6667       37.8833           88       143     2012      03        18        078              0.000000       6.852509       0.025975       0.145000   -9999.000000   -9999.000000       0.064200       0.197000
53505     53505     neimenggu      105.6667       37.8833           88       143     2012      03        19        079              0.000000       2.055817       0.106138       0.128125       0.088000   -9999.000000       0.066100       0.057000
53505     53505     neimenggu      105.6667       37.8833           88       143     2012      03        20        080              0.000000       5.735657       0.256327       0.144118       0.085000   -9999.000000       0.063100   -9999.000000
53505     53505     neimenggu      105.6667       37.8833           88       143     2012      03        21        081              0.000000       5.762817       0.279110       0.151412       0.088000   -9999.000000       0.088900       0.038000
53505     53505     neimenggu      105.6667       37.8833           88       143     2012      03        22        082              0.000000       4.882568       1.522118       0.149670   -9999.000000   -9999.000000       0.067600       0.148000
53505     53505     neimenggu      105.6667       37.8833           88       143     2012      03        23        083              0.000000       4.203552       5.648445       0.144779   -9999.000000   -9999.000000       0.068400       0.111000
53505     53505     neimenggu      105.6667       37.8833           88       143     2012      03        24        084              0.000000       4.065216       0.511458       0.138952       0.089000   -9999.000000       0.066400       0.017000
53505     53505     neimenggu      105.6667       37.8833           88       143     2012      03        25        085              0.000000       6.139801       0.054811       0.144546       0.089000   -9999.000000       0.061600   -9999.000000
53505     53505     neimenggu      105.6667       37.8833           88       143     2012      03        26        086              0.000000       7.608826       0.034721       0.151559       0.079000   -9999.000000   -9999.000000       0.192000
53505     53505     neimenggu      105.6667       37.8833           88       143     2012      03        27        087              0.000000       8.885773       0.052022       0.151490   -9999.000000   -9999.000000       0.072400       0.201000
53505     53505     neimenggu      105.6667       37.8833           88       143     2012      03        28        088              0.000000      10.067078       0.599482       0.146512   -9999.000000   -9999.000000       0.067600       0.084000
53505     53505     neimenggu      105.6667       37.8833           88       143     2012      03        29        089              0.000000      10.571747       0.623579       0.141961       0.086000       0.028100       0.067900       0.043000
53505     53505     neimenggu      105.6667       37.8833           88       143     2012      03        30        090              0.000000       9.887848       0.024417       0.137356       0.082000   -9999.000000       0.066700       0.179000
53505     53505     neimenggu      105.6667       37.8833           88       143     2012      03        31        091              0.000000       6.487762       0.284279       0.132674       0.089000   -9999.000000       0.065100       0.071000
53505     53505     neimenggu      105.6667       37.8833           88       143     2012      04        01        092              0.000000      10.550049       0.069382       0.134763       0.090000   -9999.000000   -9999.000000       0.128000
53505     53505     neimenggu      105.6667       37.8833           88       143     2012      04        02        093              0.000000      11.221619       0.065744       0.134469   -9999.000000   -9999.000000       0.072800       0.066000
53505     53505     neimenggu      105.6667       37.8833           88       143     2012      04        03        094              0.000000       7.947266       0.164451       0.130840       0.092000   -9999.000000       0.069900   -9999.000000
53505     53505     neimenggu      105.6667       37.8833           88       143     2012      04        04        095              0.000000      10.254883       5.059217       0.130410       0.088000   -9999.000000       0.066600       0.157000
53505     53505     neimenggu      105.6667       37.8833           88       143     2012      04        05        096              0.000000      11.948730       0.634234       0.127155       0.083000   -9999.000000       0.065800       0.072000
53505     53505     neimenggu      105.6667       37.8833           88       143     2012      04        06        097              0.000000      10.630615       0.000000       0.124468       0.092000   -9999.000000       0.065000       0.188000
53505     53505     neimenggu      105.6667       37.8833           88       143     2012      04        07        098              0.000000      11.999298       0.000000       0.123166   -9999.000000   -9999.000000       0.072400       0.142000
53505     53505     neimenggu      105.6667       37.8833           88       143     2012      04        08        099              0.000000      13.340363       0.000000       0.120913   -9999.000000   -9999.000000       0.070800   -9999.000000
53505     53505     neimenggu      105.6667       37.8833           88       143     2012      04        09        100              0.000000      14.480927       0.753027       0.118242       0.087000   -9999.000000       0.135800       0.171000
53505     53505     neimenggu      105.6667       37.8833           88       143     2012      04        10        101              0.000000      12.707458       0.646966       0.125453       0.097000   -9999.000000       0.071600       0.050000
53505     53505     neimenggu      105.6667       37.8833           88       143     2012      04        11        102              0.000000      14.274261       4.291891       0.134143   -9999.000000       0.047700       0.137100       0.445000
53505     53505     neimenggu      105.6667       37.8833           88       143     2012      04        12        103              0.000000       3.457214       0.259219       0.180548   -9999.000000   -9999.000000   -9999.000000       0.085000
53505     53505     neimenggu      105.6667       37.8833           88       143     2012      04        13        104              0.000000       9.025879       0.700553       0.176398   -9999.000000   -9999.000000       0.084900   -9999.000000
53505     53505     neimenggu      105.6667       37.8833           88       143     2012      04        14        105              0.000000      12.335663       0.000000       0.164377       0.079000   -9999.000000       0.078200       0.167000
53505     53505     neimenggu      105.6667       37.8833           88       143     2012      04        15        106              0.000000      13.098877       0.000000       0.155566       0.071500   -9999.000000       0.075000       0.147000
53505     53505     neimenggu      105.6667       37.8833           88       143     2012      04        16        107              0.000000      13.933807       0.000000       0.147435       0.073000       0.013600       0.068600       0.135000
53505     53505     neimenggu      105.6667       37.8833           88       143     2012      04        17        108              0.000000      14.634155       0.000000       0.139725       0.075000   -9999.000000       0.066700       0.033000
53505     53505     neimenggu      105.6667       37.8833           88       143     2012      04        18        109              0.000000      12.651794       0.000000       0.136657       0.062000   -9999.000000   -9999.000000   -9999.000000
53505     53505     neimenggu      105.6667       37.8833           88       143     2012      04        19        110              0.000000      16.472992       0.061916       0.131078       0.071500   -9999.000000       0.070600       0.013000
53505     53505     neimenggu      105.6667       37.8833           88       143     2012      04        20        111              0.000000      15.179352       0.030569       0.125637       0.070000   -9999.000000       0.073200       0.115000
53505     53505     neimenggu      105.6667       37.8833           88       143     2012      04        21        112              0.000000      15.774750       0.221094       0.122657       0.079000   -9999.000000       0.065300       0.176000
53505     53505     neimenggu      105.6667       37.8833           88       143     2012      04        22        113              0.000000      17.898712       0.000000       0.119090       0.081000   -9999.000000   -9999.000000       0.049000
53505     53505     neimenggu      105.6667       37.8833           88       143     2012      04        23        114              0.000000      20.814362       0.105398       0.115783   -9999.000000   -9999.000000       0.065100   -9999.000000
53505     53505     neimenggu      105.6667       37.8833           88       143     2012      04        24        115              0.000000      16.940002       0.575781       0.112923   -9999.000000   -9999.000000       0.072400       0.168000
53505     53505     neimenggu      105.6667       37.8833           88       143     2012      04        25        116              0.000000      12.606110       0.553516       0.113329       0.079000   -9999.000000       0.065400       0.224000
53505     53505     neimenggu      105.6667       37.8833           88       143     2012      04        26        117              0.000000      13.832336       1.515918       0.113559       0.078000   -9999.000000       0.069800       0.123000
53505     53505     neimenggu      105.6667       37.8833           88       143     2012      04        27        118              0.000000      16.657928       2.246484       0.113201       0.081000   -9999.000000       0.065600       0.090000
53505     53505     neimenggu      105.6667       37.8833           88       143     2012      04        28        119              0.000000      18.150543       0.000000       0.110137       0.063000   -9999.000000       0.064500       0.208000
53505     53505     neimenggu      105.6667       37.8833           88       143     2012      04        29        120              0.000000      19.533600       0.000000       0.108010       0.065000   -9999.000000   -9999.000000       0.239000
53505     53505     neimenggu      105.6667       37.8833           88       143     2012      04        30        121              0.000000      21.799988       8.820166       0.106725       0.159500   -9999.000000       0.126700       0.170000
53505     53505     neimenggu      105.6667       37.8833           88       143     2012      05        01        122              0.000000      14.725739       0.000000       0.195748       0.084000   -9999.000000       0.079400       0.116000
53505     53505     neimenggu      105.6667       37.8833           88       143     2012      05        02        123              0.000000      19.542969       0.000000       0.179937       0.074000   -9999.000000       0.066000   -9999.000000
53505     53505     neimenggu      105.6667       37.8833           88       143     2012      05        03        124              0.000000      20.387085       1.274996       0.162244       0.120000   -9999.000000       0.107900       0.442000
53505     53505     neimenggu      105.6667       37.8833           88       143     2012      05        04        125              0.000000      17.038544       0.000000       0.166359       0.079000   -9999.000000       0.066900       0.206000
53505     53505     neimenggu      105.6667       37.8833           88       143     2012      05        05        126              0.000000      20.337494       0.000000       0.160132       0.075000   -9999.000000   -9999.000000       0.197000
53505     53505     neimenggu      105.6667       37.8833           88       143     2012      05        06        127              0.000000      22.113861       0.442469       0.144477       0.091500   -9999.000000       0.100100       0.473000
53505     53505     neimenggu      105.6667       37.8833           88       143     2012      05        07        128              0.000000      20.994263       0.032416       0.141852   -9999.000000   -9999.000000       0.088000   -9999.000000
53505     53505     neimenggu      105.6667       37.8833           88       143     2012      05        08        129              0.000000      21.257263       0.000000       0.138554       0.078000   -9999.000000       0.072700       0.177000
53505     53505     neimenggu      105.6667       37.8833           88       143     2012      05        09        130              0.000000      23.927124       0.000000       0.128450   -9999.000000   -9999.000000       0.068600       0.241000
53505     53505     neimenggu      105.6667       37.8833           88       143     2012      05        10        131              0.000000      25.697327       0.287810       0.119806       0.086500   -9999.000000       0.076400       0.243000
53505     53505     neimenggu      105.6667       37.8833           88       143     2012      05        11        132              0.000000      20.075256       0.115865       0.120819       0.079500       0.065400       0.091500       0.158000
53505     53505     neimenggu      105.6667       37.8833           88       143     2012      05        12        133              0.000000      16.560822       1.278156       0.122795       0.079000       0.093900       0.070400   -9999.000000
53505     53505     neimenggu      105.6667       37.8833           88       143     2012      05        13        134              0.000000      17.638245       0.111129       0.119388       0.079000   -9999.000000       0.075700       0.213000
53505     53505     neimenggu      105.6667       37.8833           88       143     2012      05        14        135              0.000000      14.596375       0.204585       0.117045   -9999.000000   -9999.000000       0.073600       0.171000
53505     53505     neimenggu      105.6667       37.8833           88       143     2012      05        15        136              0.000000      17.665009       0.242532       0.113369       0.072000   -9999.000000       0.071200       0.271000
53505     53505     neimenggu      105.6667       37.8833           88       143     2012      05        16        137              0.000000      19.892059       0.000000       0.110443       0.078500   -9999.000000   -9999.000000       0.184000
53505     53505     neimenggu      105.6667       37.8833           88       143     2012      05        17        138              0.000000      20.824005       0.000000       0.108158       0.086000   -9999.000000       0.077900   -9999.000000
53505     53505     neimenggu      105.6667       37.8833           88       143     2012      05        18        139              0.000000      23.159027       0.000000       0.106395       0.088000   -9999.000000       0.076400       0.135000
53505     53505     neimenggu      105.6667       37.8833           88       143     2012      05        19        140              0.000000      23.705658       0.000000       0.105084       0.076000   -9999.000000       0.068600       0.272000
53505     53505     neimenggu      105.6667       37.8833           88       143     2012      05        20        141              0.000000      23.796356       0.152908       0.104325   -9999.000000   -9999.000000       0.074500       0.311000
53505     53505     neimenggu      105.6667       37.8833           88       143     2012      05        21        142              0.000000      23.604126       1.747407       0.105349       0.092500       0.065300       0.072500       0.162000
53505     53505     neimenggu      105.6667       37.8833           88       143     2012      05        22        143              0.000000      17.235596       0.814282       0.130662       0.083500       0.045300       0.074800   -9999.000000
53505     53505     neimenggu      105.6667       37.8833           88       143     2012      05        23        144              0.000000      19.416473       2.440077       0.122791   -9999.000000   -9999.000000       0.090600       0.499000
53505     53505     neimenggu      105.6667       37.8833           88       143     2012      05        24        145              0.000000      15.807312       0.449701       0.148563       0.086000   -9999.000000       0.075600       0.205000
53505     53505     neimenggu      105.6667       37.8833           88       143     2012      05        25        146              0.000000      19.782593       0.652374       0.143039       0.078000   -9999.000000       0.069400       0.173000
53505     53505     neimenggu      105.6667       37.8833           88       143     2012      05        26        147              0.000000      21.324921       0.236512       0.128534       0.080500   -9999.000000       0.068700       0.171000
53505     53505     neimenggu      105.6667       37.8833           88       143     2012      05        27        148              0.000000      23.173767       0.000000       0.117694       0.083500   -9999.000000   -9999.000000       0.221000
53505     53505     neimenggu      105.6667       37.8833           88       143     2012      05        28        149              0.000000      26.394470       4.179139       0.110492       0.089000   -9999.000000   -9999.000000       0.245000
53505     53505     neimenggu      105.6667       37.8833           88       143     2012      05        29        150              0.000000      17.309723       2.134179       0.157676       0.083000   -9999.000000       0.069100       0.207000
53505     53505     neimenggu      105.6667       37.8833           88       143     2012      05        30        151              0.000000      20.522675       0.187503       0.151232       0.079000   -9999.000000       0.073800   -9999.000000
53505     53505     neimenggu      105.6667       37.8833           88       143     2012      05        31        152              0.000000      21.784637       0.153115       0.134513       0.080500   -9999.000000       0.069500   -9999.000000
53505     53505     neimenggu      105.6667       37.8833           88       143     2012      06        01        153              0.000000      23.309753       0.000000       0.124146       0.082000   -9999.000000       0.067100       0.270000
53505     53505     neimenggu      105.6667       37.8833           88       143     2012      06        02        154              0.000000      24.146118       0.000000       0.115520       0.091000   -9999.000000   -9999.000000       0.189000
53505     53505     neimenggu      105.6667       37.8833           88       143     2012      06        03        155              0.000000      25.239410       0.000000       0.110684       0.087000       0.119700   -9999.000000       0.266000
53505     53505     neimenggu      105.6667       37.8833           88       143     2012      06        04        156              0.000000      24.425598       0.000000       0.108871       0.079000   -9999.000000       0.069600       0.240000
53505     53505     neimenggu      105.6667       37.8833           88       143     2012      06        05        157              0.000000      26.053528       1.045918       0.106715       0.151000   -9999.000000       0.083200   -9999.000000
53505     53505     neimenggu      105.6667       37.8833           88       143     2012      06        06        158              0.000000      21.163422       0.329446       0.114200       0.095500   -9999.000000       0.075400       0.297000
53505     53505     neimenggu      105.6667       37.8833           88       143     2012      06        07        159              0.000000      19.935638       0.512632       0.129819       0.083000   -9999.000000       0.064100       0.115000
53505     53505     neimenggu      105.6667       37.8833           88       143     2012      06        08        160              0.000000      22.960052       1.319719       0.120636       0.085000   -9999.000000       0.073000       0.170000
53505     53505     neimenggu      105.6667       37.8833           88       143     2012      06        09        161              0.000000      23.563934       1.806101       0.113423       0.076000       0.103200       0.067900       0.209000
53505     53505     neimenggu      105.6667       37.8833           88       143     2012      06        10        162              0.000000      26.058655       2.585127       0.107288       0.073000   -9999.000000       0.073300   -9999.000000
53505     53505     neimenggu      105.6667       37.8833           88       143     2012      06        11        163              0.000000      23.359772       0.255953       0.104451       0.078500   -9999.000000       0.070300       0.230000
53505     53505     neimenggu      105.6667       37.8833           88       143     2012      06        12        164              0.000000      25.497162       0.871883       0.102822       0.077000   -9999.000000       0.066200       0.222000
53505     53505     neimenggu      105.6667       37.8833           88       143     2012      06        13        165              0.000000      26.891693       0.906435       0.102022       0.082000   -9999.000000   -9999.000000       0.262000
53505     53505     neimenggu      105.6667       37.8833           88       143     2012      06        14        166              0.000000      25.234131       0.365790       0.101225       0.076000       0.069700       0.075600       0.146000
53505     53505     neimenggu      105.6667       37.8833           88       143     2012      06        15        167              0.000000      23.207306       0.291189       0.101682       0.070000   -9999.000000       0.068300   -9999.000000
53505     53505     neimenggu      105.6667       37.8833           88       143     2012      06        16        168              0.000000      24.592529       0.000000       0.101295       0.078000   -9999.000000       0.077200       0.204000
53505     53505     neimenggu      105.6667       37.8833           88       143     2012      06        17        169              0.000000      26.675690       2.912962       0.100549       0.086500       0.232500       0.071000       0.266000
53505     53505     neimenggu      105.6667       37.8833           88       143     2012      06        18        170              0.000000      28.098053       0.864512       0.111428       0.067000   -9999.000000       0.059500       0.343000
53505     53505     neimenggu      105.6667       37.8833           88       143     2012      06        19        171              0.000000      26.552216       9.186707       0.137911       0.081000   -9999.000000   -9999.000000       0.215000
53505     53505     neimenggu      105.6667       37.8833           88       143     2012      06        20        172              0.000000      26.664154       0.421086       0.163114       0.082000   -9999.000000       0.073300   -9999.000000
53505     53505     neimenggu      105.6667       37.8833           88       143     2012      06        21        173              0.000000      26.269958       0.000000       0.187019       0.075500   -9999.000000       0.061700       0.201000
53505     53505     neimenggu      105.6667       37.8833           88       143     2012      06        22        174              0.000000      27.784119      12.869198       0.154165       0.089000       0.220700       0.052800       0.425000
53505     53505     neimenggu      105.6667       37.8833           88       143     2012      06        23        175              0.000000      26.492645       0.000000       0.237070       0.074000   -9999.000000       0.060600       0.193000
53505     53505     neimenggu      105.6667       37.8833           88       143     2012      06        24        176              0.000000      24.241760       0.000000       0.203008       0.087000   -9999.000000       0.057700       0.190000
53505     53505     neimenggu      105.6667       37.8833           88       143     2012      06        25        177              0.000000      26.970551       0.000000       0.174010       0.072000   -9999.000000       0.077800       0.123000
53505     53505     neimenggu      105.6667       37.8833           88       143     2012      06        26        178              0.000000      28.369171       4.019632       0.155098       0.076000   -9999.000000       0.116700       0.242000
53505     53505     neimenggu      105.6667       37.8833           88       143     2012      06        27        179              0.000000      27.120972      11.869816       0.161050       0.183000   -9999.000000       0.145300       0.827000
53505     53505     neimenggu      105.6667       37.8833           88       143     2012      06        28        180              0.000000      20.715790       5.963642       0.246980       0.136000   -9999.000000       0.127600       0.814000
53505     53505     neimenggu      105.6667       37.8833           88       143     2012      06        29        181              0.000000      21.500671       0.000000       0.237800       0.121000       0.057300       0.106200   -9999.000000
53505     53505     neimenggu      105.6667       37.8833           88       143     2012      06        30        182              0.000000      24.089844       0.000000       0.219412       0.100000   -9999.000000   -9999.000000   -9999.000000
53505     53505     neimenggu      105.6667       37.8833           88       143     2012      07        01        183              0.000000      25.964966       0.000000       0.196203       0.088000   -9999.000000       0.086400       0.356000
53505     53505     neimenggu      105.6667       37.8833           88       143     2012      07        02        184              0.000000      26.655609       0.000000       0.182184       0.076000       0.186300       0.071300       0.303000
53505     53505     neimenggu      105.6667       37.8833           88       143     2012      07        03        185              0.000000      28.401398       1.527848       0.168935       0.078000   -9999.000000       0.076300       0.246000
53505     53505     neimenggu      105.6667       37.8833           88       143     2012      07        04        186              0.000000      26.295807       1.505236       0.161995       0.073000       0.156400       0.066500   -9999.000000
53505     53505     neimenggu      105.6667       37.8833           88       143     2012      07        05        187              0.000000      26.516174       0.000000       0.166329       0.077000   -9999.000000       0.062300       0.142000
53505     53505     neimenggu      105.6667       37.8833           88       143     2012      07        06        188              0.000000      28.049286       0.785434       0.152614       0.098000   -9999.000000   -9999.000000       0.432000
53505     53505     neimenggu      105.6667       37.8833           88       143     2012      07        07        189              0.000000      23.798340       0.449381       0.154436   -9999.000000   -9999.000000       0.066900       0.273000
53505     53505     neimenggu      105.6667       37.8833           88       143     2012      07        08        190              0.000000      25.770691       0.962500       0.152716       0.077000   -9999.000000       0.068800       0.203000
53505     53505     neimenggu      105.6667       37.8833           88       143     2012      07        09        191              0.000000      25.263977       0.000000       0.162321       0.071000   -9999.000000       0.061200   -9999.000000
53505     53505     neimenggu      105.6667       37.8833           88       143     2012      07        10        192              0.000000      27.225220       0.355324       0.147814       0.076000   -9999.000000       0.061000       0.184000
53505     53505     neimenggu      105.6667       37.8833           88       143     2012      07        11        193              0.000000      28.879791       0.000000       0.139617       0.068000   -9999.000000       0.056800       0.375000
53505     53505     neimenggu      105.6667       37.8833           88       143     2012      07        12        194              0.000000      28.505402       0.050756       0.131465       0.067000   -9999.000000       0.067700       0.290000
53505     53505     neimenggu      105.6667       37.8833           88       143     2012      07        13        195              0.000000      29.028412       0.174088       0.124199       0.071000   -9999.000000       0.063300       0.243000
53505     53505     neimenggu      105.6667       37.8833           88       143     2012      07        14        196              0.000000      25.805267       0.167127       0.124967       0.079000   -9999.000000       0.064700   -9999.000000
53505     53505     neimenggu      105.6667       37.8833           88       143     2012      07        15        197              0.000000      28.012451       0.000000       0.122146       0.076000   -9999.000000       0.063000       0.292000
53505     53505     neimenggu      105.6667       37.8833           88       143     2012      07        16        198              0.000000      28.386108       0.000000       0.118416       0.068000   -9999.000000       0.064000       0.328000
53505     53505     neimenggu      105.6667       37.8833           88       143     2012      07        17        199              0.000000      29.735809       4.003984       0.115933       0.099000   -9999.000000   -9999.000000       0.312000
53505     53505     neimenggu      105.6667       37.8833           88       143     2012      07        18        200              0.000000      26.273376      11.198926       0.156469       0.119000   -9999.000000       0.108500       0.607000
53505     53505     neimenggu      105.6667       37.8833           88       143     2012      07        19        201              0.000000      24.006104       0.041718       0.225033       0.083500   -9999.000000       0.079800   -9999.000000
53505     53505     neimenggu      105.6667       37.8833           88       143     2012      07        20        202              0.082875      26.591888       7.248456       0.199364       0.070000       0.068800       0.064800       0.245000
53505     53505     neimenggu      105.6667       37.8833           88       143     2012      07        21        203              0.080208      26.340515       0.102277       0.208086       0.110000   -9999.000000       0.086700       0.485000
53505     53505     neimenggu      105.6667       37.8833           88       143     2012      07        22        204              0.058958      24.133850       0.500769       0.213208       0.090000   -9999.000000       0.063500       0.298000
53505     53505     neimenggu      105.6667       37.8833           88       143     2012      07        23        205              0.054083      26.358551       0.000000       0.188996       0.079000       0.238100   -9999.000000       0.234000
53505     53505     neimenggu      105.6667       37.8833           88       143     2012      07        24        206              0.050750      26.125122       4.645162       0.174264       0.092500   -9999.000000       0.095900       0.224000
53505     53505     neimenggu      105.6667       37.8833           88       143     2012      07        25        207              0.052167      24.279541       3.913969       0.198937       0.073000   -9999.000000       0.075100       0.253000
53505     53505     neimenggu      105.6667       37.8833           88       143     2012      07        26        208              0.051333      27.281708       0.145598       0.189635       0.076000   -9999.000000       0.068500       0.284000
53505     53505     neimenggu      105.6667       37.8833           88       143     2012      07        27        209              0.050417      28.639160       3.294699       0.175983       0.107000   -9999.000000       0.040600       0.721000
53505     53505     neimenggu      105.6667       37.8833           88       143     2012      07        28        210              0.050917      27.999268       0.000000       0.189360       0.079000       0.214600   -9999.000000   -9999.000000
53505     53505     neimenggu      105.6667       37.8833           88       143     2012      07        29        211              0.146583      28.836090      28.717665       0.177842       0.092000   -9999.000000       0.128400       0.254000
53505     53505     neimenggu      105.6667       37.8833           88       143     2012      07        30        212              0.202042      27.875122       0.707388       0.225372       0.137000   -9999.000000       0.121800       0.771000
53505     53505     neimenggu      105.6667       37.8833           88       143     2012      07        31        213              0.125042      21.093384       0.000000       0.257936       0.074000   -9999.000000       0.104300       0.642000
53505     53505     neimenggu      105.6667       37.8833           88       143     2012      08        01        214              0.105500      25.297516       0.000000       0.228933       0.079500       0.085800       0.076600       0.399000
53505     53505     neimenggu      105.6667       37.8833           88       143     2012      08        02        215              0.091875      27.012390       0.000000       0.211287       0.082000   -9999.000000       0.070700   -9999.000000
53505     53505     neimenggu      105.6667       37.8833           88       143     2012      08        03        216              0.082708      27.198822       0.000000       0.197780       0.067500   -9999.000000   -9999.000000       0.338000
53505     53505     neimenggu      105.6667       37.8833           88       143     2012      08        04        217              0.075792      27.848511       0.000000       0.188163       0.070500   -9999.000000       0.078600       0.456000
53505     53505     neimenggu      105.6667       37.8833           88       143     2012      08        05        218              0.068875      27.740967       0.000000       0.179834       0.068000   -9999.000000       0.081300       0.369000
53505     53505     neimenggu      105.6667       37.8833           88       143     2012      08        06        219              0.062833      27.617035       0.908838       0.172237       0.075000   -9999.000000       0.058400       0.361000
53505     53505     neimenggu      105.6667       37.8833           88       143     2012      08        07        220              0.057833      27.226746       0.000000       0.164639       0.072000   -9999.000000       0.064900   -9999.000000
53505     53505     neimenggu      105.6667       37.8833           88       143     2012      08        08        221              0.054708      25.748535       0.000000       0.159273       0.073000   -9999.000000       0.060600       0.312000
53505     53505     neimenggu      105.6667       37.8833           88       143     2012      08        09        222              0.051292      24.278961       0.000000       0.157212       0.071500   -9999.000000       0.071000       0.458000
53505     53505     neimenggu      105.6667       37.8833           88       143     2012      08        10        223              0.047750      26.392395       5.519329       0.150207       0.074000   -9999.000000       0.089000       0.325000
53505     53505     neimenggu      105.6667       37.8833           88       143     2012      08        11        224              0.046750      27.770325       0.873617       0.189843       0.077000   -9999.000000       0.072300       0.442000
53505     53505     neimenggu      105.6667       37.8833           88       143     2012      08        12        225              0.046250      23.229156       0.044396       0.197869       0.082000   -9999.000000       0.066600   -9999.000000
53505     53505     neimenggu      105.6667       37.8833           88       143     2012      08        13        226              0.046000      23.601776       0.523494       0.182752       0.079000   -9999.000000       0.074400       0.404000
53505     53505     neimenggu      105.6667       37.8833           88       143     2012      08        14        227              0.045000      23.066528       0.000000       0.182424       0.077000   -9999.000000   -9999.000000       0.407000
53505     53505     neimenggu      105.6667       37.8833           88       143     2012      08        15        228              0.043792      24.609711       0.000000       0.168566       0.074500   -9999.000000       0.077600       0.338000
53505     53505     neimenggu      105.6667       37.8833           88       143     2012      08        16        229              0.042458      25.362946       3.272759       0.156895       0.073000   -9999.000000       0.087200       0.264000
53505     53505     neimenggu      105.6667       37.8833           88       143     2012      08        17        230              0.050625      25.057739       4.073059       0.167375       0.085000   -9999.000000       0.111800   -9999.000000
53505     53505     neimenggu      105.6667       37.8833           88       143     2012      08        18        231              0.052750      24.689178       0.068303       0.204809       0.080000   -9999.000000       0.075000       0.328000
53505     53505     neimenggu      105.6667       37.8833           88       143     2012      08        19        232              0.049375      22.976166       0.000000       0.193765       0.074000   -9999.000000       0.069600       0.450000
53505     53505     neimenggu      105.6667       37.8833           88       143     2012      08        20        233              0.046042      24.536224       0.000000       0.174337       0.071000   -9999.000000   -9999.000000       0.317000
53505     53505     neimenggu      105.6667       37.8833           88       143     2012      08        21        234              0.044333      22.638702       0.000000       0.162624       0.076000   -9999.000000       0.084200   -9999.000000
53505     53505     neimenggu      105.6667       37.8833           88       143     2012      08        22        235              0.042958      21.708801       0.000000       0.153520       0.083000   -9999.000000       0.083500   -9999.000000
53505     53505     neimenggu      105.6667       37.8833           88       143     2012      08        23        236              0.041500      23.371765       0.000000       0.147466       0.077000   -9999.000000       0.076200       0.332000
53505     53505     neimenggu      105.6667       37.8833           88       143     2012      08        24        237              0.040292      24.752441       0.000000       0.141691   -9999.000000   -9999.000000       0.077700   -9999.000000
53505     53505     neimenggu      105.6667       37.8833           88       143     2012      08        25        238              0.000000      25.442627       3.289958       0.135780       0.088000   -9999.000000       0.078100       0.410000
53505     53505     neimenggu      105.6667       37.8833           88       143     2012      08        26        239              0.042958      21.639404       0.000000       0.178795       0.079000   -9999.000000       0.084900   -9999.000000
53505     53505     neimenggu      105.6667       37.8833           88       143     2012      08        27        240              0.042708      24.507751       0.000000       0.160155       0.077000   -9999.000000       0.074600       0.342000
53505     53505     neimenggu      105.6667       37.8833           88       143     2012      08        28        241              0.042792      24.948303       0.000000       0.147613       0.091000   -9999.000000       0.078300       0.342000
53505     53505     neimenggu      105.6667       37.8833           88       143     2012      08        29        242              0.043250      25.892181       0.000000       0.136514       0.074000   -9999.000000       0.075300       0.371000
53505     53505     neimenggu      105.6667       37.8833           88       143     2012      08        30        243              0.187875      25.917328      17.856039       0.128194       0.099000   -9999.000000       0.073300       0.787000
53505     53505     neimenggu      105.6667       37.8833           88       143     2012      08        31        244              0.217071      23.838226      20.243090       0.225622       0.080000   -9999.000000   -9999.000000   -9999.000000
53505     53505     neimenggu      105.6667       37.8833           88       143     2012      09        01        245              0.000000      21.073944       3.117829       0.260340       0.149000   -9999.000000       0.111300       0.689000
53505     53505     neimenggu      105.6667       37.8833           88       143     2012      09        02        246              0.158091      15.866119       0.000000       0.265881       0.109000   -9999.000000       0.095900       0.476000
53505     53505     neimenggu      105.6667       37.8833           88       143     2012      09        03        247              0.141958      19.315948       0.000000       0.235983       0.106000   -9999.000000       0.096100       0.449000
53505     53505     neimenggu      105.6667       37.8833           88       143     2012      09        04        248              0.126042      18.849670       0.000000       0.222496       0.099000   -9999.000000       0.085700       0.277000
53505     53505     neimenggu      105.6667       37.8833           88       143     2012      09        05        249              0.117750      19.132660       0.000000       0.213977       0.084000   -9999.000000       0.077700   -9999.000000
53505     53505     neimenggu      105.6667       37.8833           88       143     2012      09        06        250              0.112417      19.804657       0.000000       0.207793       0.082500   -9999.000000   -9999.000000       0.354000
53505     53505     neimenggu      105.6667       37.8833           88       143     2012      09        07        251              0.107333      21.688141       0.000000       0.199298       0.080000   -9999.000000       0.083200       0.389000
53505     53505     neimenggu      105.6667       37.8833           88       143     2012      09        08        252              0.103875      21.559875       0.000000       0.194112       0.087000   -9999.000000       0.087600       0.372000
53505     53505     neimenggu      105.6667       37.8833           88       143     2012      09        09        253              0.098750      22.406464       6.835584       0.188476       0.084000   -9999.000000       0.078100       0.247000
53505     53505     neimenggu      105.6667       37.8833           88       143     2012      09        10        254              0.105208      21.713531      10.651443       0.195277       0.117000   -9999.000000       0.089600   -9999.000000
53505     53505     neimenggu      105.6667       37.8833           88       143     2012      09        11        255              0.122857      20.548279       0.000000       0.253136       0.098000   -9999.000000       0.078900       0.334000
53505     53505     neimenggu      105.6667       37.8833           88       143     2012      09        12        256              0.111000      17.047180       0.270468       0.237954       0.075000   -9999.000000       0.087100       0.363000
53505     53505     neimenggu      105.6667       37.8833           88       143     2012      09        13        257              0.105167      14.495178       0.325817       0.224148       0.083000   -9999.000000       0.078400       0.362000
53505     53505     neimenggu      105.6667       37.8833           88       143     2012      09        14        258              0.099833      15.866638       0.000000       0.214174       0.087000   -9999.000000       0.077800       0.177000
53505     53505     neimenggu      105.6667       37.8833           88       143     2012      09        15        259              0.094625      16.947418       0.000000       0.207237       0.082000   -9999.000000       0.076900   -9999.000000
53505     53505     neimenggu      105.6667       37.8833           88       143     2012      09        16        260              0.092042      17.699371       0.167756       0.201670       0.082000   -9999.000000       0.071800       0.262000
53505     53505     neimenggu      105.6667       37.8833           88       143     2012      09        17        261              0.087708      17.955505       2.484899       0.198318       0.076000   -9999.000000   -9999.000000       0.464000
53505     53505     neimenggu      105.6667       37.8833           88       143     2012      09        18        262              0.082652      17.708923       0.000000       0.212716       0.081000   -9999.000000       0.073300       0.326000
53505     53505     neimenggu      105.6667       37.8833           88       143     2012      09        19        263              0.082375      18.398529       0.412087       0.200717       0.079000   -9999.000000       0.075200       0.232000
53505     53505     neimenggu      105.6667       37.8833           88       143     2012      09        20        264              0.078792      19.222565       0.037570       0.191273       0.087000       0.140800       0.074500       0.331000
53505     53505     neimenggu      105.6667       37.8833           88       143     2012      09        21        265              0.076083      16.109650       0.000000       0.192066   -9999.000000   -9999.000000       0.073000       0.304000
53505     53505     neimenggu      105.6667       37.8833           88       143     2012      09        22        266              0.074667      18.632843       0.000000       0.186731       0.078500   -9999.000000       0.070500       0.323000
53505     53505     neimenggu      105.6667       37.8833           88       143     2012      09        23        267              0.073458      19.756744       0.954035       0.181041       0.078000   -9999.000000   -9999.000000       0.362000
53505     53505     neimenggu      105.6667       37.8833           88       143     2012      09        24        268              0.083542      20.097198      11.191442       0.178897       0.129000       0.081000       0.109800   -9999.000000
53505     53505     neimenggu      105.6667       37.8833           88       143     2012      09        25        269              0.116667      14.764191       0.940609       0.228760       0.109000   -9999.000000       0.088400       0.566000
53505     53505     neimenggu      105.6667       37.8833           88       143     2012      09        26        270              0.108304      15.692078       0.000000       0.229797       0.087500   -9999.000000       0.077800       0.372000
53505     53505     neimenggu      105.6667       37.8833           88       143     2012      09        27        271              0.104455      16.742096       0.000000       0.213360       0.080500   -9999.000000       0.070800       0.249000
53505     53505     neimenggu      105.6667       37.8833           88       143     2012      09        28        272              0.097133      13.159241       0.000000       0.203325       0.073000   -9999.000000       0.073800       0.247000
53505     53505     neimenggu      105.6667       37.8833           88       143     2012      09        29        273              0.087773      12.051392       0.000000       0.198979       0.086000   -9999.000000       0.080300   -9999.000000
53505     53505     neimenggu      105.6667       37.8833           88       143     2012      09        30        274              0.082750      13.344696       0.000000       0.194539       0.082000   -9999.000000       0.076000       0.276000
53505     53505     neimenggu      105.6667       37.8833           88       143     2012      10        01        275              0.078526      14.817444       0.000000       0.190596       0.074000   -9999.000000       0.072100       0.347000
53505     53505     neimenggu      105.6667       37.8833           88       143     2012      10        02        276              0.074625      15.559967       0.000000       0.185593       0.076000   -9999.000000       0.069300       0.353000
53505     53505     neimenggu      105.6667       37.8833           88       143     2012      10        03        277              0.073583      14.397217       0.127988       0.183261       0.086000   -9999.000000       0.069000       0.500000
53505     53505     neimenggu      105.6667       37.8833           88       143     2012      10        04        278              0.071667      15.839325       0.000000       0.181381       0.075000   -9999.000000   -9999.000000   -9999.000000
53505     53505     neimenggu      105.6667       37.8833           88       143     2012      10        05        279              0.070083      13.972412       0.000000       0.178254       0.078000   -9999.000000       0.079100       0.268000
53505     53505     neimenggu      105.6667       37.8833           88       143     2012      10        06        280              0.068083      13.567566       0.000000       0.175383       0.078000   -9999.000000       0.078500       0.326000
53505     53505     neimenggu      105.6667       37.8833           88       143     2012      10        07        281              0.066583      14.302856       0.000000       0.174742       0.080000   -9999.000000       0.074300       0.305000
53505     53505     neimenggu      105.6667       37.8833           88       143     2012      10        08        282              0.065000      15.970337       0.852001       0.173170       0.079500   -9999.000000       0.077700       0.217000
53505     53505     neimenggu      105.6667       37.8833           88       143     2012      10        09        283              0.065571      12.165771       0.772552       0.182602       0.081000   -9999.000000       0.070600   -9999.000000
53505     53505     neimenggu      105.6667       37.8833           88       143     2012      10        10        284              0.065167      11.711212       0.000000       0.176910       0.090000   -9999.000000       0.076400       0.145000
53505     53505     neimenggu      105.6667       37.8833           88       143     2012      10        11        285              0.064083      13.044189       0.000000       0.172400   -9999.000000   -9999.000000       0.075900       0.315000
53505     53505     neimenggu      105.6667       37.8833           88       143     2012      10        12        286              0.063000      13.230255       0.796994       0.168722   -9999.000000   -9999.000000       0.072800       0.308000
53505     53505     neimenggu      105.6667       37.8833           88       143     2012      10        13        287              0.061875      12.887268       0.104204       0.165506       0.083000   -9999.000000       0.078300       0.137000
53505     53505     neimenggu      105.6667       37.8833           88       143     2012      10        14        288              0.060875      10.649902       0.000000       0.165083       0.086000   -9999.000000       0.073300   -9999.000000
53505     53505     neimenggu      105.6667       37.8833           88       143     2012      10        15        289              0.060875      11.343231       0.087497       0.166160       0.083000   -9999.000000   -9999.000000       0.295000
53505     53505     neimenggu      105.6667       37.8833           88       143     2012      10        16        290              0.060458      11.030731       5.935223       0.166670   -9999.000000   -9999.000000       0.081900       0.225000
53505     53505     neimenggu      105.6667       37.8833           88       143     2012      10        17        291              0.060625       7.427368       0.000000       0.175855   -9999.000000   -9999.000000       0.079600       0.160000
53505     53505     neimenggu      105.6667       37.8833           88       143     2012      10        18        292              0.060417       7.748596       0.000000       0.213677       0.088000   -9999.000000       0.082200       0.144000
53505     53505     neimenggu      105.6667       37.8833           88       143     2012      10        19        293              0.060208       9.556335       0.000000       0.195257       0.089000   -9999.000000       0.076900       0.244000
53505     53505     neimenggu      105.6667       37.8833           88       143     2012      10        20        294              0.059875      11.482391       0.040626       0.188164       0.085000   -9999.000000       0.074100       0.231000
53505     53505     neimenggu      105.6667       37.8833           88       143     2012      10        21        295              0.059875      12.941803       0.990100       0.183779       0.098000   -9999.000000   -9999.000000       0.438000
53505     53505     neimenggu      105.6667       37.8833           88       143     2012      10        22        296              0.060583       7.132416       0.000000       0.190034   -9999.000000   -9999.000000       0.081300       0.188000
53505     53505     neimenggu      105.6667       37.8833           88       143     2012      10        23        297              0.059917       8.169067       2.067145       0.183068   -9999.000000   -9999.000000       0.079500   -9999.000000
53505     53505     neimenggu      105.6667       37.8833           88       143     2012      10        24        298              0.060458       8.384644       0.000000       0.184839   -9999.000000   -9999.000000       0.073100       0.203000
53505     53505     neimenggu      105.6667       37.8833           88       143     2012      10        25        299              0.000000       8.625397       1.885063       0.192769       0.089000   -9999.000000       0.076300       0.211000
53505     53505     neimenggu      105.6667       37.8833           88       143     2012      10        26        300              0.059958       9.191711       0.000000       0.194207       0.092000   -9999.000000       0.073000       0.227000
53505     53505     neimenggu      105.6667       37.8833           88       143     2012      10        27        301              0.059625       9.666351       0.000000       0.196184   -9999.000000   -9999.000000       0.079500       0.176000
53505     53505     neimenggu      105.6667       37.8833           88       143     2012      10        28        302              0.000000       9.255219       1.251285       0.188996   -9999.000000   -9999.000000       0.078800   -9999.000000
53505     53505     neimenggu      105.6667       37.8833           88       143     2012      10        29        303              0.058917       9.595825       0.000000       0.185067       0.084000   -9999.000000       0.077400       0.254000
53505     53505     neimenggu      105.6667       37.8833           88       143     2012      10        30        304              0.059083       6.878723       2.067491       0.177777       0.089000   -9999.000000       0.074900       0.198000
53505     53505     neimenggu      105.6667       37.8833           88       143     2012      10        31        305              0.060208       5.794983       0.000000       0.176030       0.087000   -9999.000000       0.071900       0.244000
53505     53505     neimenggu      105.6667       37.8833           88       143     2012      11        01        306              0.060292       6.144196       0.000000       0.175323   -9999.000000   -9999.000000   -9999.000000       0.163000
53505     53505     neimenggu      105.6667       37.8833           88       143     2012      11        02        307              0.060250       7.437103       0.256938       0.176371   -9999.000000   -9999.000000       0.081500   -9999.000000
53505     53505     neimenggu      105.6667       37.8833           88       143     2012      11        03        308              0.059625       5.008514       0.000000       0.158170   -9999.000000   -9999.000000       0.075800       0.117000
53505     53505     neimenggu      105.6667       37.8833           88       143     2012      11        04        309              0.062792      -1.220795       0.000000       0.114972       0.091000       0.089100       0.083600       0.122000
53505     53505     neimenggu      105.6667       37.8833           88       143     2012      11        05        310              0.064417      -0.321411       0.000000       0.117479       0.087000       0.126400       0.083200   -9999.000000
53505     53505     neimenggu      105.6667       37.8833           88       143     2012      11        06        311              0.064417       1.093414       0.209532       0.134620       0.095000   -9999.000000       0.078700       0.097000
53505     53505     neimenggu      105.6667       37.8833           88       143     2012      11        07        312              0.064458       2.488129       0.000000       0.151559   -9999.000000   -9999.000000   -9999.000000   -9999.000000
53505     53505     neimenggu      105.6667       37.8833           88       143     2012      11        08        313              0.064583       2.554077       0.000000       0.144353   -9999.000000       0.087600       0.085800       0.062000
53505     53505     neimenggu      105.6667       37.8833           88       143     2012      11        09        314              0.064208       3.595612       0.024551       0.159783       0.090000       0.069900       0.078500       0.274000
53505     53505     neimenggu      105.6667       37.8833           88       143     2012      11        10        315              0.062875       2.774139       0.607253       0.150230       0.093000       0.109200       0.078100       0.244000
53505     53505     neimenggu      105.6667       37.8833           88       143     2012      11        11        316              0.063667      -1.114990       0.000000       0.115029       0.091000   -9999.000000       0.088400       0.083000
53505     53505     neimenggu      105.6667       37.8833           88       143     2012      11        12        317              0.064750       0.406158       0.072043       0.121937   -9999.000000   -9999.000000       0.080100   -9999.000000
53505     53505     neimenggu      105.6667       37.8833           88       143     2012      11        13        318              0.000000       1.396362       0.000000       0.137387   -9999.000000   -9999.000000       0.078300       0.040000
53505     53505     neimenggu      105.6667       37.8833           88       143     2012      11        14        319              0.065500       1.737061       0.000000       0.137540       0.096000   -9999.000000       0.079900       0.335000
53505     53505     neimenggu      105.6667       37.8833           88       143     2012      11        15        320              0.063875       2.553009       0.000000       0.151198       0.087000   -9999.000000       0.077600       0.115000
53505     53505     neimenggu      105.6667       37.8833           88       143     2012      11        16        321              0.063208       1.350647       0.000000       0.142284       0.092000   -9999.000000       0.087400       0.198000
53505     53505     neimenggu      105.6667       37.8833           88       143     2012      11        17        322              0.000000       2.210175       0.185141       0.140593       0.102000   -9999.000000       0.081200       0.167000
53505     53505     neimenggu      105.6667       37.8833           88       143     2012      11        18        323              0.064250       3.503723       0.216408       0.158665   -9999.000000       0.079300   -9999.000000       0.136000
53505     53505     neimenggu      105.6667       37.8833           88       143     2012      11        19        324              0.063250       2.466705       0.000000       0.144414       0.099000   -9999.000000       0.084300       0.183000
53505     53505     neimenggu      105.6667       37.8833           88       143     2012      11        20        325              0.060750       1.323334       0.000000       0.137509       0.095000   -9999.000000       0.077900       0.173000
53505     53505     neimenggu      105.6667       37.8833           88       143     2012      11        21        326              0.062458       1.579132       0.000000       0.137645       0.093000   -9999.000000       0.076600   -9999.000000
53505     53505     neimenggu      105.6667       37.8833           88       143     2012      11        22        327              0.059208       2.087463       0.000000       0.145605   -9999.000000   -9999.000000       0.078600       0.139000
53505     53505     neimenggu      105.6667       37.8833           88       143     2012      11        23        328              0.056500      -2.020782       0.000000       0.100792   -9999.000000   -9999.000000       0.078000       0.162000
53505     53505     neimenggu      105.6667       37.8833           88       143     2012      11        24        329              0.064125      -1.568542       0.000000       0.106309   -9999.000000   -9999.000000   -9999.000000       0.238000
53505     53505     neimenggu      105.6667       37.8833           88       143     2012      11        25        330              0.062042      -0.348877       0.000000       0.113729   -9999.000000   -9999.000000       0.077400       0.169000
53505     53505     neimenggu      105.6667       37.8833           88       143     2012      11        26        331              0.056417      -2.461609       2.722566       0.094797       0.095000   -9999.000000   -9999.000000   -9999.000000
53505     53505     neimenggu      105.6667       37.8833           88       143     2012      11        27        332              0.055167      -0.480835       1.330781       0.113936   -9999.000000   -9999.000000       0.081800       0.130000
53505     53505     neimenggu      105.6667       37.8833           88       143     2012      11        28        333              0.051625      -1.937469       0.000000       0.108862   -9999.000000   -9999.000000       0.077900       0.144000
53505     53505     neimenggu      105.6667       37.8833           88       143     2012      11        29        334              0.053833      -4.056305       2.787097       0.087158   -9999.000000   -9999.000000   -9999.000000       0.236000
53505     53505     neimenggu      105.6667       37.8833           88       143     2012      11        30        335              0.049375      -2.770142       0.000000       0.102958   -9999.000000   -9999.000000       0.083800       0.146000
53505     53505     neimenggu      105.6667       37.8833           88       143     2012      12        01        336              0.054875      -2.624023       0.338013       0.088635   -9999.000000   -9999.000000       0.077100   -9999.000000
53505     53505     neimenggu      105.6667       37.8833           88       143     2012      12        02        337              0.047167      -1.857666       0.000000       0.104464   -9999.000000   -9999.000000       0.081300       0.165000
53505     53505     neimenggu      105.6667       37.8833           88       143     2012      12        03        338              0.054667      -3.714203       2.935981       0.087994   -9999.000000   -9999.000000       0.081100       0.241000
53505     53505     neimenggu      105.6667       37.8833           88       143     2012      12        04        339              0.049542      -1.757782       0.000000       0.101981   -9999.000000   -9999.000000       0.077100       0.202000
53505     53505     neimenggu      105.6667       37.8833           88       143     2012      12        05        340              0.049333      -3.300446       0.238522       0.089204   -9999.000000       0.102900   -9999.000000       0.136000
53505     53505     neimenggu      105.6667       37.8833           88       143     2012      12        06        341              0.049917      -2.901245       0.843805       0.091306   -9999.000000   -9999.000000       0.079300   -9999.000000
53505     53505     neimenggu      105.6667       37.8833           88       143     2012      12        07        342              0.046708      -2.356812       0.000000       0.100193   -9999.000000   -9999.000000       0.079400       0.055000
53505     53505     neimenggu      105.6667       37.8833           88       143     2012      12        08        343              0.045333      -4.632233       0.000000       0.083562   -9999.000000   -9999.000000       0.075900       0.193000
53505     53505     neimenggu      105.6667       37.8833           88       143     2012      12        09        344              0.046375      -6.262238       0.394821       0.074007   -9999.000000   -9999.000000       0.082600       0.226000
53505     53505     neimenggu      105.6667       37.8833           88       143     2012      12        10        345              0.048833      -3.991821       0.623913       0.084280   -9999.000000   -9999.000000       0.073500       0.059000
53505     53505     neimenggu      105.6667       37.8833           88       143     2012      12        11        346              0.051083      -3.003296       0.000000       0.097249       0.097000   -9999.000000       0.079700   -9999.000000
53505     53505     neimenggu      105.6667       37.8833           88       143     2012      12        12        347              0.055000      -2.990112       0.000000       0.099619   -9999.000000   -9999.000000       0.083700       0.143000
53505     53505     neimenggu      105.6667       37.8833           88       143     2012      12        13        348              0.055583      -1.902100       0.498801       0.098390   -9999.000000   -9999.000000       0.079900       0.258000
53505     53505     neimenggu      105.6667       37.8833           88       143     2012      12        14        349              0.054783      -1.806091       0.000000       0.103608       0.099000   -9999.000000       0.077200       0.082000
53505     53505     neimenggu      105.6667       37.8833           88       143     2012      12        15        350              0.000000      -0.973114       0.000000       0.110479   -9999.000000   -9999.000000       0.080800       0.121000
53505     53505     neimenggu      105.6667       37.8833           88       143     2012      12        16        351              0.045333      -3.937134       0.000000       0.076722   -9999.000000   -9999.000000   -9999.000000       0.219000
53505     53505     neimenggu      105.6667       37.8833           88       143     2012      12        17        352              0.046292      -4.091217       0.000000       0.077834   -9999.000000   -9999.000000       0.078100       0.111000
53505     53505     neimenggu      105.6667       37.8833           88       143     2012      12        18        353              0.045958      -5.494751       0.000000       0.073034   -9999.000000   -9999.000000       0.077700       0.171000
53505     53505     neimenggu      105.6667       37.8833           88       143     2012      12        19        354              0.045375      -5.086151       0.000000       0.078937   -9999.000000   -9999.000000       0.071000       0.172000
53505     53505     neimenggu      105.6667       37.8833           88       143     2012      12        20        355              0.000000      -4.790161       0.000000       0.075183   -9999.000000   -9999.000000       0.073600   -9999.000000
53505     53505     neimenggu      105.6667       37.8833           88       143     2012      12        21        356              0.042667      -7.382812       0.000000       0.069283   -9999.000000   -9999.000000       0.074100       0.114000
53505     53505     neimenggu      105.6667       37.8833           88       143     2012      12        22        357              0.041263      -7.578003       0.000000       0.067232   -9999.000000   -9999.000000   -9999.000000       0.144000
53505     53505     neimenggu      105.6667       37.8833           88       143     2012      12        23        358              0.000000     -11.727295       0.000000       0.065025   -9999.000000   -9999.000000       0.081300       0.178000
53505     53505     neimenggu      105.6667       37.8833           88       143     2012      12        24        359              0.000000     -10.567596       0.000000       0.063073   -9999.000000   -9999.000000       0.073400       0.084000
53505     53505     neimenggu      105.6667       37.8833           88       143     2012      12        25        360              0.000000      -9.292419       0.000000       0.063302   -9999.000000   -9999.000000       0.078400   -9999.000000
53505     53505     neimenggu      105.6667       37.8833           88       143     2012      12        26        361              0.000000      -9.050568       0.000000       0.063367   -9999.000000   -9999.000000       0.074600       0.192000
53505     53505     neimenggu      105.6667       37.8833           88       143     2012      12        27        362              0.000000      -6.646179       0.000000       0.065958   -9999.000000   -9999.000000       0.075600       0.180000
53505     53505     neimenggu      105.6667       37.8833           88       143     2012      12        28        363              0.000000      -5.520721       0.000000       0.076420   -9999.000000   -9999.000000       0.073300       0.185000
53505     53505     neimenggu      105.6667       37.8833           88       143     2012      12        29        364              0.000000     -10.251404       0.000000       0.065995   -9999.000000   -9999.000000       0.072600       0.107000
53505     53505     neimenggu      105.6667       37.8833           88       143     2012      12        30        365              0.000000     -11.384796       0.000000       0.063166   -9999.000000   -9999.000000       0.076200   -9999.000000
53505     53505     neimenggu      105.6667       37.8833           88       143     2012      12        31        366              0.000000      -8.139099       0.000000       0.063476   -9999.000000   -9999.000000       0.077400       0.170000
