# Supplementary material for: Research on Fusing Multisatellite Soil Moisture Data Based on Bayesian Model Averaging
Source: Hindawi journal article supplement (doi:10.1155/2018/9310838), 2018-06-25
Supplement: f1 [file 9310838.f1.zip › 2012_sm00-10cm_daily_ZDB_ZHY_53513_366days_allin.txt]

53513     53513     neimenggu      107.3667       40.7333           77       149     2012      01        01        001              0.000000   -9999.000000       0.000000   -9999.000000   -9999.000000   -9999.000000       0.084100   -9999.000000
53513     53513     neimenggu      107.3667       40.7333           77       149     2012      01        02        002              0.000000      -7.210052       0.000000       0.167695   -9999.000000   -9999.000000       0.078900       0.143000
53513     53513     neimenggu      107.3667       40.7333           77       149     2012      01        03        003              0.000000      -9.109619       0.000000       0.164933   -9999.000000   -9999.000000       0.071900   -9999.000000
53513     53513     neimenggu      107.3667       40.7333           77       149     2012      01        04        004              0.000000     -10.877655       0.000000       0.162232   -9999.000000   -9999.000000       0.086200       0.141000
53513     53513     neimenggu      107.3667       40.7333           77       149     2012      01        05        005              0.000000     -10.999146       0.400460       0.161934   -9999.000000   -9999.000000       0.079300       0.061000
53513     53513     neimenggu      107.3667       40.7333           77       149     2012      01        06        006              0.000000     -11.163635       0.000000       0.162068   -9999.000000   -9999.000000       0.087100       0.060000
53513     53513     neimenggu      107.3667       40.7333           77       149     2012      01        07        007              0.000000     -10.678619       0.000000       0.162630   -9999.000000   -9999.000000       0.085300       0.080000
53513     53513     neimenggu      107.3667       40.7333           77       149     2012      01        08        008              0.000000     -10.004578       0.000000       0.163738   -9999.000000   -9999.000000       0.080100       0.012000
53513     53513     neimenggu      107.3667       40.7333           77       149     2012      01        09        009              0.000000     -10.064758       0.000000       0.163784   -9999.000000   -9999.000000   -9999.000000       0.085000
53513     53513     neimenggu      107.3667       40.7333           77       149     2012      01        10        010              0.000000      -9.075317       0.000000       0.166206   -9999.000000   -9999.000000       0.086800       0.009000
53513     53513     neimenggu      107.3667       40.7333           77       149     2012      01        11        011              0.000000      -9.132965       0.000000       0.166725   -9999.000000   -9999.000000       0.082500       0.150000
53513     53513     neimenggu      107.3667       40.7333           77       149     2012      01        12        012              0.000000      -9.849915       0.000000       0.164607   -9999.000000   -9999.000000       0.084600       0.094000
53513     53513     neimenggu      107.3667       40.7333           77       149     2012      01        13        013              0.000000      -9.229492       0.000000       0.165889   -9999.000000   -9999.000000   -9999.000000       0.022000
53513     53513     neimenggu      107.3667       40.7333           77       149     2012      01        14        014              0.000000      -8.674866       0.000000       0.167101   -9999.000000   -9999.000000       0.078800       0.109000
53513     53513     neimenggu      107.3667       40.7333           77       149     2012      01        15        015              0.000000      -7.819305       0.000000       0.168311   -9999.000000   -9999.000000       0.081200       0.108000
53513     53513     neimenggu      107.3667       40.7333           77       149     2012      01        16        016              0.000000      -7.738678       0.000000       0.171181   -9999.000000   -9999.000000       0.058400       0.132000
53513     53513     neimenggu      107.3667       40.7333           77       149     2012      01        17        017              0.000000      -7.357910       0.000000       0.172993   -9999.000000   -9999.000000       0.087600   -9999.000000
53513     53513     neimenggu      107.3667       40.7333           77       149     2012      01        18        018              0.000000      -6.774719       0.000000       0.176205   -9999.000000   -9999.000000       0.089900       0.082000
53513     53513     neimenggu      107.3667       40.7333           77       149     2012      01        19        019              0.000000      -7.569244       0.000000       0.170683   -9999.000000   -9999.000000       0.086600       0.162000
53513     53513     neimenggu      107.3667       40.7333           77       149     2012      01        20        020              0.000000      -9.104004       0.000000       0.166833   -9999.000000   -9999.000000       0.069700       0.072000
53513     53513     neimenggu      107.3667       40.7333           77       149     2012      01        21        021              0.000000     -12.323944       0.000000       0.163940   -9999.000000   -9999.000000       0.082900       0.100000
53513     53513     neimenggu      107.3667       40.7333           77       149     2012      01        22        022              0.000000     -13.538788       0.000000       0.160921   -9999.000000   -9999.000000       0.085200   -9999.000000
53513     53513     neimenggu      107.3667       40.7333           77       149     2012      01        23        023              0.000000     -13.344421       0.000000       0.159579   -9999.000000   -9999.000000       0.086900       0.080000
53513     53513     neimenggu      107.3667       40.7333           77       149     2012      01        24        024              0.000000     -11.895752       0.000000       0.159676   -9999.000000   -9999.000000   -9999.000000       0.121000
53513     53513     neimenggu      107.3667       40.7333           77       149     2012      01        25        025              0.000000     -10.507965       0.000000       0.160171   -9999.000000   -9999.000000       0.088400       0.126000
53513     53513     neimenggu      107.3667       40.7333           77       149     2012      01        26        026              0.000000      -8.317871       0.000000       0.164843   -9999.000000   -9999.000000       0.084000       0.048000
53513     53513     neimenggu      107.3667       40.7333           77       149     2012      01        27        027              0.000000      -7.988861       0.000000       0.166977   -9999.000000   -9999.000000       0.087500   -9999.000000
53513     53513     neimenggu      107.3667       40.7333           77       149     2012      01        28        028              0.000000      -7.254089       0.000000       0.170892   -9999.000000   -9999.000000       0.083400       0.137000
53513     53513     neimenggu      107.3667       40.7333           77       149     2012      01        29        029              0.000000      -8.743744       0.000000       0.168065   -9999.000000   -9999.000000       0.084300       0.068000
53513     53513     neimenggu      107.3667       40.7333           77       149     2012      01        30        030              0.000000      -8.691254       0.000000       0.168337   -9999.000000   -9999.000000   -9999.000000       0.155000
53513     53513     neimenggu      107.3667       40.7333           77       149     2012      01        31        031              0.000000      -7.146362       0.000000       0.174162   -9999.000000   -9999.000000       0.078300       0.110000
53513     53513     neimenggu      107.3667       40.7333           77       149     2012      02        01        032              0.000000      -9.456329       0.000000       0.167655   -9999.000000   -9999.000000       0.089600   -9999.000000
53513     53513     neimenggu      107.3667       40.7333           77       149     2012      02        02        033              0.000000     -11.036102       0.000000       0.161098   -9999.000000   -9999.000000       0.063800       0.119000
53513     53513     neimenggu      107.3667       40.7333           77       149     2012      02        03        034              0.000000     -10.095398       0.000000       0.161775   -9999.000000   -9999.000000       0.086000       0.217000
53513     53513     neimenggu      107.3667       40.7333           77       149     2012      02        04        035              0.000000      -8.367065       0.000000       0.167215   -9999.000000   -9999.000000       0.088600       0.078000
53513     53513     neimenggu      107.3667       40.7333           77       149     2012      02        05        036              0.000000      -7.779510       0.000000       0.170873   -9999.000000   -9999.000000       0.078700       0.015000
53513     53513     neimenggu      107.3667       40.7333           77       149     2012      02        06        037              0.000000      -7.564514       0.000000       0.172864   -9999.000000   -9999.000000       0.069300       0.020000
53513     53513     neimenggu      107.3667       40.7333           77       149     2012      02        07        038              0.000000     -10.917572       0.000000       0.162538   -9999.000000   -9999.000000       0.088600       0.074000
53513     53513     neimenggu      107.3667       40.7333           77       149     2012      02        08        039              0.000000     -10.340424       0.000000       0.162594   -9999.000000   -9999.000000       0.079100       0.117000
53513     53513     neimenggu      107.3667       40.7333           77       149     2012      02        09        040              0.000000      -9.095154       0.000000       0.164385   -9999.000000   -9999.000000       0.086200       0.145000
53513     53513     neimenggu      107.3667       40.7333           77       149     2012      02        10        041              0.000000      -8.332123       0.000000       0.170357   -9999.000000   -9999.000000       0.083800       0.081000
53513     53513     neimenggu      107.3667       40.7333           77       149     2012      02        11        042              0.000000      -7.638672       0.000000       0.171369   -9999.000000   -9999.000000       0.079600       0.086000
53513     53513     neimenggu      107.3667       40.7333           77       149     2012      02        12        043              0.000000      -6.114166       0.000000       0.176893   -9999.000000   -9999.000000   -9999.000000       0.015000
53513     53513     neimenggu      107.3667       40.7333           77       149     2012      02        13        044              0.000000      -4.510956       0.000000       0.182251       0.097000   -9999.000000   -9999.000000       0.308000
53513     53513     neimenggu      107.3667       40.7333           77       149     2012      02        14        045              0.000000      -3.043182       0.000000       0.187349       0.105000   -9999.000000   -9999.000000       0.218000
53513     53513     neimenggu      107.3667       40.7333           77       149     2012      02        15        046              0.000000      -4.737579       0.348067       0.182206   -9999.000000   -9999.000000       0.087100   -9999.000000
53513     53513     neimenggu      107.3667       40.7333           77       149     2012      02        16        047              0.000000      -6.022400       0.000000       0.178930   -9999.000000   -9999.000000   -9999.000000       0.056000
53513     53513     neimenggu      107.3667       40.7333           77       149     2012      02        17        048              0.000000      -6.522614       0.000000       0.176368   -9999.000000   -9999.000000       0.077400       0.019000
53513     53513     neimenggu      107.3667       40.7333           77       149     2012      02        18        049              0.000000      -7.078979       0.083247       0.174988   -9999.000000   -9999.000000       0.088600       0.132000
53513     53513     neimenggu      107.3667       40.7333           77       149     2012      02        19        050              0.000000      -6.523987       0.207241       0.175879       0.104000   -9999.000000       0.061400       0.087000
53513     53513     neimenggu      107.3667       40.7333           77       149     2012      02        20        051              0.000000      -4.691437       0.000000       0.180373   -9999.000000   -9999.000000       0.082700   -9999.000000
53513     53513     neimenggu      107.3667       40.7333           77       149     2012      02        21        052              0.000000      -2.291779       0.000000       0.185521   -9999.000000   -9999.000000   -9999.000000       0.118000
53513     53513     neimenggu      107.3667       40.7333           77       149     2012      02        22        053              0.000000      -0.636444       0.000000       0.188788       0.085000   -9999.000000       0.080500       0.040000
53513     53513     neimenggu      107.3667       40.7333           77       149     2012      02        23        054              0.000000      -1.706848       0.000000       0.187561       0.095000   -9999.000000       0.062000       0.016000
53513     53513     neimenggu      107.3667       40.7333           77       149     2012      02        24        055              0.000000      -0.892883       0.000000       0.187980   -9999.000000   -9999.000000       0.084800       0.151000
53513     53513     neimenggu      107.3667       40.7333           77       149     2012      02        25        056              0.000000      -3.836884       0.000000       0.182017   -9999.000000   -9999.000000       0.080500   -9999.000000
53513     53513     neimenggu      107.3667       40.7333           77       149     2012      02        26        057              0.000000      -6.109070       0.000000       0.175822   -9999.000000   -9999.000000       0.084300       0.173000
53513     53513     neimenggu      107.3667       40.7333           77       149     2012      02        27        058              0.000000      -3.436127       0.000000       0.180848       0.089000   -9999.000000   -9999.000000       0.058000
53513     53513     neimenggu      107.3667       40.7333           77       149     2012      02        28        059              0.000000      -1.005005       0.000000       0.185000       0.095000   -9999.000000   -9999.000000       0.084000
53513     53513     neimenggu      107.3667       40.7333           77       149     2012      02        29        060              0.000000   -9999.000000       0.000000   -9999.000000       0.094000   -9999.000000   -9999.000000   -9999.000000
53513     53513     neimenggu      107.3667       40.7333           77       149     2012      03        01        061              0.000000       0.923248       0.000000       0.186867       0.100000   -9999.000000   -9999.000000   -9999.000000
53513     53513     neimenggu      107.3667       40.7333           77       149     2012      03        02        062              0.000000       0.898560       0.000000       0.187021   -9999.000000   -9999.000000       0.088300       0.192000
53513     53513     neimenggu      107.3667       40.7333           77       149     2012      03        03        063              0.000000       1.705994       0.000000       0.189261       0.100000   -9999.000000       0.093300       0.176000
53513     53513     neimenggu      107.3667       40.7333           77       149     2012      03        04        064              0.000000       2.332886       0.000000       0.191756   -9999.000000   -9999.000000       0.081100       0.400000
53513     53513     neimenggu      107.3667       40.7333           77       149     2012      03        05        065              0.000000      -0.031189       0.000000       0.190564       0.095000   -9999.000000       0.072900       0.087000
53513     53513     neimenggu      107.3667       40.7333           77       149     2012      03        06        066              0.000000      -1.466156       0.391709       0.185904       0.099000   -9999.000000       0.081300       0.178000
53513     53513     neimenggu      107.3667       40.7333           77       149     2012      03        07        067              0.000000      -0.284088       0.000000       0.190048   -9999.000000   -9999.000000       0.063300       0.105000
53513     53513     neimenggu      107.3667       40.7333           77       149     2012      03        08        068              0.000000      -0.921722       0.000000       0.187235   -9999.000000   -9999.000000       0.080600       0.207000
53513     53513     neimenggu      107.3667       40.7333           77       149     2012      03        09        069              0.000000      -0.595001       0.000000       0.185200       0.088000   -9999.000000       0.086900       0.227000
53513     53513     neimenggu      107.3667       40.7333           77       149     2012      03        10        070              0.000000       1.068359       0.000000       0.185443       0.085000   -9999.000000       0.079400       0.005000
53513     53513     neimenggu      107.3667       40.7333           77       149     2012      03        11        071              0.000000      -2.413208       0.000000       0.179739       0.098000   -9999.000000       0.065700       0.073000
53513     53513     neimenggu      107.3667       40.7333           77       149     2012      03        12        072              0.000000      -2.362213       0.000000       0.178619   -9999.000000   -9999.000000       0.081500       0.116000
53513     53513     neimenggu      107.3667       40.7333           77       149     2012      03        13        073              0.000000       1.209015       0.000000       0.181768   -9999.000000   -9999.000000       0.083400       0.308000
53513     53513     neimenggu      107.3667       40.7333           77       149     2012      03        14        074              0.000000       3.398163       0.000000       0.182500       0.086000   -9999.000000   -9999.000000       0.287000
53513     53513     neimenggu      107.3667       40.7333           77       149     2012      03        15        075              0.000000       4.553833       0.197515       0.183438       0.094000   -9999.000000       0.096400   -9999.000000
53513     53513     neimenggu      107.3667       40.7333           77       149     2012      03        16        076              0.000000       3.593018       0.000000       0.183664       0.100000   -9999.000000       0.084500       0.230000
53513     53513     neimenggu      107.3667       40.7333           77       149     2012      03        17        077              0.000000       7.303558       0.000000       0.182834       0.095000   -9999.000000       0.087500       0.170000
53513     53513     neimenggu      107.3667       40.7333           77       149     2012      03        18        078              0.000000       3.118866       0.000000       0.180679   -9999.000000   -9999.000000       0.053800       0.246000
53513     53513     neimenggu      107.3667       40.7333           77       149     2012      03        19        079              0.000000       3.439484       0.000000       0.182161       0.092000   -9999.000000       0.092100       0.315000
53513     53513     neimenggu      107.3667       40.7333           77       149     2012      03        20        080              0.000000       6.109009       0.000000       0.182225       0.098000   -9999.000000       0.101900   -9999.000000
53513     53513     neimenggu      107.3667       40.7333           77       149     2012      03        21        081              0.000000       6.493652       0.000000       0.181998       0.089000   -9999.000000       0.096600       0.393000
53513     53513     neimenggu      107.3667       40.7333           77       149     2012      03        22        082              0.000000       6.420044       0.000000       0.182928       0.106000   -9999.000000       0.080900       0.251000
53513     53513     neimenggu      107.3667       40.7333           77       149     2012      03        23        083              0.000000       4.761078       0.225475       0.182147   -9999.000000   -9999.000000       0.089400       0.320000
53513     53513     neimenggu      107.3667       40.7333           77       149     2012      03        24        084              0.000000       5.818268       4.672215       0.180797       0.098000   -9999.000000       0.084100       0.275000
53513     53513     neimenggu      107.3667       40.7333           77       149     2012      03        25        085              0.000000       8.538544       0.148735       0.179605       0.097000   -9999.000000       0.101400   -9999.000000
53513     53513     neimenggu      107.3667       40.7333           77       149     2012      03        26        086              0.000000       9.232208       0.272074       0.179907       0.100000   -9999.000000       0.115000       0.484000
53513     53513     neimenggu      107.3667       40.7333           77       149     2012      03        27        087              0.000000      10.166870       0.251652       0.180146       0.110000   -9999.000000       0.101800       0.419000
53513     53513     neimenggu      107.3667       40.7333           77       149     2012      03        28        088              0.000000      11.312836       0.000000       0.179284   -9999.000000   -9999.000000       0.086400       0.442000
53513     53513     neimenggu      107.3667       40.7333           77       149     2012      03        29        089              0.000000       9.256500       0.000000       0.179233   -9999.000000   -9999.000000       0.094000       0.260000
53513     53513     neimenggu      107.3667       40.7333           77       149     2012      03        30        090              0.000000       7.483490       0.136305       0.178796       0.094000   -9999.000000       0.111300   -9999.000000
53513     53513     neimenggu      107.3667       40.7333           77       149     2012      03        31        091              0.000000       7.456207       0.000000       0.178282       0.099000   -9999.000000       0.112100       0.393000
53513     53513     neimenggu      107.3667       40.7333           77       149     2012      04        01        092              0.000000      10.197571       0.000000       0.177365       0.111000   -9999.000000       0.104400       0.379000
53513     53513     neimenggu      107.3667       40.7333           77       149     2012      04        02        093              0.000000      12.216522       0.000000       0.177117   -9999.000000   -9999.000000       0.091100       0.363000
53513     53513     neimenggu      107.3667       40.7333           77       149     2012      04        03        094              0.000000       8.334778       0.000000       0.177292   -9999.000000   -9999.000000       0.104200       0.298000
53513     53513     neimenggu      107.3667       40.7333           77       149     2012      04        04        095              0.000000      11.349884       0.000000       0.177035       0.092000   -9999.000000       0.062900       0.308000
53513     53513     neimenggu      107.3667       40.7333           77       149     2012      04        05        096              0.000000      11.665710       0.000000       0.176363       0.100000   -9999.000000       0.109600       0.230000
53513     53513     neimenggu      107.3667       40.7333           77       149     2012      04        06        097              0.000000      12.358551       0.000000       0.176323       0.104000   -9999.000000       0.106500       0.331000
53513     53513     neimenggu      107.3667       40.7333           77       149     2012      04        07        098              0.000000      14.480225       0.000000       0.175729       0.109000   -9999.000000       0.095800       0.306000
53513     53513     neimenggu      107.3667       40.7333           77       149     2012      04        08        099              0.000000      14.876160       0.000000       0.175456   -9999.000000   -9999.000000       0.086500       0.279000
53513     53513     neimenggu      107.3667       40.7333           77       149     2012      04        09        100              0.000000      14.894531       0.000000       0.175248       0.097000   -9999.000000       0.113200       0.291000
53513     53513     neimenggu      107.3667       40.7333           77       149     2012      04        10        101              0.000000      16.383759       0.000000       0.175358       0.088000   -9999.000000       0.091600       0.337000
53513     53513     neimenggu      107.3667       40.7333           77       149     2012      04        11        102              0.000000      10.125000       0.773687       0.176309       0.091000   -9999.000000       0.100300       0.329000
53513     53513     neimenggu      107.3667       40.7333           77       149     2012      04        12        103              0.000000       6.348053       0.000000       0.177364       0.109000   -9999.000000       0.096900       0.389000
53513     53513     neimenggu      107.3667       40.7333           77       149     2012      04        13        104              0.000000      13.508118       0.000000       0.176493   -9999.000000   -9999.000000       0.093800   -9999.000000
53513     53513     neimenggu      107.3667       40.7333           77       149     2012      04        14        105              0.000000      15.217957       0.000000       0.175259       0.087000   -9999.000000       0.078800       0.285000
53513     53513     neimenggu      107.3667       40.7333           77       149     2012      04        15        106              0.000000      16.521973       0.000000       0.174500       0.087000   -9999.000000       0.095400       0.167000
53513     53513     neimenggu      107.3667       40.7333           77       149     2012      04        16        107              0.000000      14.733948       0.000000       0.174418       0.093000   -9999.000000       0.103200       0.287000
53513     53513     neimenggu      107.3667       40.7333           77       149     2012      04        17        108              0.000000      17.075073       0.000000       0.173929       0.097000       0.071500       0.101000       0.414000
53513     53513     neimenggu      107.3667       40.7333           77       149     2012      04        18        109              0.000000      19.717438       0.000000       0.173410       0.093000   -9999.000000   -9999.000000   -9999.000000
53513     53513     neimenggu      107.3667       40.7333           77       149     2012      04        19        110              0.000000      19.170654       0.000000       0.173705   -9999.000000   -9999.000000       0.087400       0.313000
53513     53513     neimenggu      107.3667       40.7333           77       149     2012      04        20        111              0.000000      16.174530       0.202319       0.173638   -9999.000000   -9999.000000       0.096900       0.239000
53513     53513     neimenggu      107.3667       40.7333           77       149     2012      04        21        112              0.000000      14.196320       0.000000       0.176733       0.094000   -9999.000000       0.070700       0.264000
53513     53513     neimenggu      107.3667       40.7333           77       149     2012      04        22        113              0.000000      18.731262       0.000000       0.174781       0.104000       0.082100   -9999.000000       0.399000
53513     53513     neimenggu      107.3667       40.7333           77       149     2012      04        23        114              0.000000      21.855438       1.197656       0.172934   -9999.000000   -9999.000000       0.095900   -9999.000000
53513     53513     neimenggu      107.3667       40.7333           77       149     2012      04        24        115              0.000000      16.584076       0.000000       0.184253   -9999.000000   -9999.000000       0.090500       0.343000
53513     53513     neimenggu      107.3667       40.7333           77       149     2012      04        25        116              0.000000      13.005157       0.000000       0.177277       0.087000   -9999.000000       0.079700       0.223000
53513     53513     neimenggu      107.3667       40.7333           77       149     2012      04        26        117              0.000000      14.650574       0.000000       0.174731       0.093000   -9999.000000       0.093100       0.246000
53513     53513     neimenggu      107.3667       40.7333           77       149     2012      04        27        118              0.000000      18.285492       0.000000       0.173372       0.096000   -9999.000000       0.093400       0.182000
53513     53513     neimenggu      107.3667       40.7333           77       149     2012      04        28        119              0.000000      16.167633       0.000000       0.173119       0.104000   -9999.000000       0.103500   -9999.000000
53513     53513     neimenggu      107.3667       40.7333           77       149     2012      04        29        120              0.000000      19.824249       1.473307       0.172455       0.097000       0.090200       0.103300       0.346000
53513     53513     neimenggu      107.3667       40.7333           77       149     2012      04        30        121              0.000000      23.043915       2.441895       0.179852       0.079000   -9999.000000       0.096700       0.279000
53513     53513     neimenggu      107.3667       40.7333           77       149     2012      05        01        122              0.000000      17.122284       0.000000       0.209717       0.094000   -9999.000000       0.095000       0.238000
53513     53513     neimenggu      107.3667       40.7333           77       149     2012      05        02        123              0.000000      21.836212       0.000000       0.189302       0.092000   -9999.000000       0.103700       0.239000
53513     53513     neimenggu      107.3667       40.7333           77       149     2012      05        03        124              0.000000      22.909424       0.000000       0.179304       0.102500   -9999.000000       0.103400       0.237000
53513     53513     neimenggu      107.3667       40.7333           77       149     2012      05        04        125              0.000000      23.955780       0.000000       0.176657       0.103000   -9999.000000       0.109200       0.274000
53513     53513     neimenggu      107.3667       40.7333           77       149     2012      05        05        126              0.000000      26.123840       0.000000       0.174919       0.099000       0.093300   -9999.000000       0.373000
53513     53513     neimenggu      107.3667       40.7333           77       149     2012      05        06        127              0.000000      26.160431       0.000000       0.173667       0.096500   -9999.000000       0.104300       0.343000
53513     53513     neimenggu      107.3667       40.7333           77       149     2012      05        07        128              0.000000      27.851227       0.000000       0.173193   -9999.000000   -9999.000000       0.130800       0.368000
53513     53513     neimenggu      107.3667       40.7333           77       149     2012      05        08        129              0.000000      28.355774       0.000000       0.173437       0.095000   -9999.000000       0.122700       0.333000
53513     53513     neimenggu      107.3667       40.7333           77       149     2012      05        09        130              0.000000      27.851929       0.000000       0.173121   -9999.000000   -9999.000000       0.140600       0.401000
53513     53513     neimenggu      107.3667       40.7333           77       149     2012      05        10        131              0.000000      29.640686      14.719572       0.172110   -9999.000000   -9999.000000       0.285400       0.859000
53513     53513     neimenggu      107.3667       40.7333           77       149     2012      05        11        132              0.000000      18.415802       0.643174       0.289858   -9999.000000   -9999.000000       0.187900       0.710000
53513     53513     neimenggu      107.3667       40.7333           77       149     2012      05        12        133              0.000000      16.995422       0.000000       0.272725       0.107000   -9999.000000       0.164500   -9999.000000
53513     53513     neimenggu      107.3667       40.7333           77       149     2012      05        13        134              0.000000      17.578186       0.000000       0.239153       0.106000   -9999.000000       0.179400       0.517000
53513     53513     neimenggu      107.3667       40.7333           77       149     2012      05        14        135              0.000000      16.138763       0.000000       0.219129   -9999.000000   -9999.000000       0.169700       0.481000
53513     53513     neimenggu      107.3667       40.7333           77       149     2012      05        15        136              0.000000      17.344910       0.000000       0.204876   -9999.000000   -9999.000000       0.172300       0.589000
53513     53513     neimenggu      107.3667       40.7333           77       149     2012      05        16        137              0.000000      21.294647       0.000000       0.194601       0.093000   -9999.000000       0.155200       0.495000
53513     53513     neimenggu      107.3667       40.7333           77       149     2012      05        17        138              0.000000      22.463257       0.000000       0.189939       0.097000       0.215200       0.180800   -9999.000000
53513     53513     neimenggu      107.3667       40.7333           77       149     2012      05        18        139              0.000000      25.095612       0.000000       0.186626       0.090000   -9999.000000       0.169500       0.538000
53513     53513     neimenggu      107.3667       40.7333           77       149     2012      05        19        140              0.000000      27.803619       0.000000       0.184094       0.108000   -9999.000000       0.154400       0.513000
53513     53513     neimenggu      107.3667       40.7333           77       149     2012      05        20        141              0.000000      28.047302       0.768324       0.183234   -9999.000000   -9999.000000       0.161600       0.527000
53513     53513     neimenggu      107.3667       40.7333           77       149     2012      05        21        142              0.000000      29.045868       0.178168       0.184420   -9999.000000   -9999.000000       0.193800       0.518000
53513     53513     neimenggu      107.3667       40.7333           77       149     2012      05        22        143              0.000000      19.760742       0.000000       0.189686       0.115000   -9999.000000   -9999.000000   -9999.000000
53513     53513     neimenggu      107.3667       40.7333           77       149     2012      05        23        144              0.000000      20.280792       0.134790       0.181870   -9999.000000       0.130200       0.171400       0.541000
53513     53513     neimenggu      107.3667       40.7333           77       149     2012      05        24        145              0.000000      21.137268       0.000000       0.180376       0.133000   -9999.000000       0.175500       0.564000
53513     53513     neimenggu      107.3667       40.7333           77       149     2012      05        25        146              0.000000      23.817474       0.000000       0.179080   -9999.000000   -9999.000000       0.159500       0.493000
53513     53513     neimenggu      107.3667       40.7333           77       149     2012      05        26        147              0.000000      24.891693       0.000000       0.178264   -9999.000000   -9999.000000       0.161900       0.525000
53513     53513     neimenggu      107.3667       40.7333           77       149     2012      05        27        148              0.000000      26.590942       0.000000       0.176712       0.135500   -9999.000000       0.166700   -9999.000000
53513     53513     neimenggu      107.3667       40.7333           77       149     2012      05        28        149              0.000000      28.900116      20.702168       0.175777   -9999.000000       0.256600   -9999.000000       0.571000
53513     53513     neimenggu      107.3667       40.7333           77       149     2012      05        29        150              0.000000      18.873138       0.060600       0.299754       0.129000   -9999.000000       0.160400       0.666000
53513     53513     neimenggu      107.3667       40.7333           77       149     2012      05        30        151              0.000000      19.336548       0.104752       0.277826   -9999.000000   -9999.000000       0.186500   -9999.000000
53513     53513     neimenggu      107.3667       40.7333           77       149     2012      05        31        152              0.000000      21.897949       0.000000       0.246939   -9999.000000   -9999.000000       0.161400   -9999.000000
53513     53513     neimenggu      107.3667       40.7333           77       149     2012      06        01        153              0.000000      23.926483       0.000000       0.222497       0.161500   -9999.000000       0.163400       0.564000
53513     53513     neimenggu      107.3667       40.7333           77       149     2012      06        02        154              0.000000      24.386200       0.097853       0.206700       0.140000   -9999.000000       0.154500       0.641000
53513     53513     neimenggu      107.3667       40.7333           77       149     2012      06        03        155              0.000000      26.552734       0.000000       0.198984       0.145000   -9999.000000   -9999.000000       0.561000
53513     53513     neimenggu      107.3667       40.7333           77       149     2012      06        04        156              0.000000      26.809692       0.000000       0.193836       0.169000       0.169500       0.162900       0.536000
53513     53513     neimenggu      107.3667       40.7333           77       149     2012      06        05        157              0.000000      29.165649      12.725305       0.189942   -9999.000000   -9999.000000       0.122600       0.948000
53513     53513     neimenggu      107.3667       40.7333           77       149     2012      06        06        158              0.000000      26.733490       1.729720       0.253070   -9999.000000   -9999.000000       0.243400       0.946000
53513     53513     neimenggu      107.3667       40.7333           77       149     2012      06        07        159              0.000000      20.422943       0.223665       0.293980       0.200000       0.383400       0.206200       0.748000
53513     53513     neimenggu      107.3667       40.7333           77       149     2012      06        08        160              0.000000      20.737183       0.060439       0.267334       0.132000   -9999.000000       0.167000       0.572000
53513     53513     neimenggu      107.3667       40.7333           77       149     2012      06        09        161              0.000000      24.960480       0.000000       0.236653       0.149000   -9999.000000       0.143800       0.410000
53513     53513     neimenggu      107.3667       40.7333           77       149     2012      06        10        162              0.000000      22.116211       0.000000       0.215951       0.190000       0.073100       0.162800   -9999.000000
53513     53513     neimenggu      107.3667       40.7333           77       149     2012      06        11        163              0.000000      23.328857       0.000000       0.202414       0.174500   -9999.000000       0.166600       0.561000
53513     53513     neimenggu      107.3667       40.7333           77       149     2012      06        12        164              0.000000      26.214996       0.000000       0.194780       0.165500   -9999.000000       0.180000       0.436000
53513     53513     neimenggu      107.3667       40.7333           77       149     2012      06        13        165              0.000000      28.754456       0.191339       0.190908       0.151000   -9999.000000       0.165900       0.471000
53513     53513     neimenggu      107.3667       40.7333           77       149     2012      06        14        166              0.000000      23.901672       0.000000       0.190205       0.171000   -9999.000000       0.172900       0.440000
53513     53513     neimenggu      107.3667       40.7333           77       149     2012      06        15        167              0.000000      25.687592       0.000000       0.188330       0.182000       0.157700       0.137600   -9999.000000
53513     53513     neimenggu      107.3667       40.7333           77       149     2012      06        16        168              0.000000      27.230835       0.000000       0.185925       0.173000   -9999.000000       0.170400       0.539000
53513     53513     neimenggu      107.3667       40.7333           77       149     2012      06        17        169              0.000000      29.151093       0.000000       0.184146       0.148000   -9999.000000       0.157700       0.533000
53513     53513     neimenggu      107.3667       40.7333           77       149     2012      06        18        170              0.000000      31.414307       0.000000       0.182616       0.149000   -9999.000000       0.185600       0.508000
53513     53513     neimenggu      107.3667       40.7333           77       149     2012      06        19        171              0.000000      31.220642       0.391844       0.182062       0.145000   -9999.000000       0.190700       0.591000
53513     53513     neimenggu      107.3667       40.7333           77       149     2012      06        20        172              0.000000      28.986877       0.954484       0.185017       0.196000   -9999.000000       0.199200   -9999.000000
53513     53513     neimenggu      107.3667       40.7333           77       149     2012      06        21        173              0.000000      26.940704       0.000000       0.189416       0.187000   -9999.000000       0.176900       0.605000
53513     53513     neimenggu      107.3667       40.7333           77       149     2012      06        22        174              0.000000      31.142242       0.000000       0.182840       0.158500   -9999.000000       0.131400       0.667000
53513     53513     neimenggu      107.3667       40.7333           77       149     2012      06        23        175              0.000000      31.601685       6.320798       0.179834   -9999.000000       0.254400       0.227400       0.579000
53513     53513     neimenggu      107.3667       40.7333           77       149     2012      06        24        176              0.000000      23.630829       0.000000       0.245330       0.162000   -9999.000000       0.190400       0.680000
53513     53513     neimenggu      107.3667       40.7333           77       149     2012      06        25        177              0.000000      28.014801      44.367386       0.215679       0.160000   -9999.000000       0.331400   -9999.000000
53513     53513     neimenggu      107.3667       40.7333           77       149     2012      06        26        178              0.000000      29.364380      34.116726       0.287860   -9999.000000   -9999.000000       0.333200       1.000000
53513     53513     neimenggu      107.3667       40.7333           77       149     2012      06        27        179              0.000000      21.118927      50.926090       0.425735   -9999.000000       0.219100       0.432600       1.000000
53513     53513     neimenggu      107.3667       40.7333           77       149     2012      06        28        180              0.000000      21.012482       0.000000       0.406114       0.203000   -9999.000000       0.338000       0.794000
53513     53513     neimenggu      107.3667       40.7333           77       149     2012      06        29        181              0.000000      25.178040       0.000000       0.363231       0.139000   -9999.000000       0.320000   -9999.000000
53513     53513     neimenggu      107.3667       40.7333           77       149     2012      06        30        182              0.000000      24.844238       0.000000       0.342622       0.145000   -9999.000000       0.305000   -9999.000000
53513     53513     neimenggu      107.3667       40.7333           77       149     2012      07        01        183              0.000000      26.205170       0.000000       0.326480   -9999.000000   -9999.000000       0.273800       0.881000
53513     53513     neimenggu      107.3667       40.7333           77       149     2012      07        02        184              0.000000      26.967957       0.000000       0.315093       0.172000   -9999.000000       0.243800       0.815000
53513     53513     neimenggu      107.3667       40.7333           77       149     2012      07        03        185              0.000000      27.916473       1.490549       0.300187       0.195000       0.192300       0.316000       0.844000
53513     53513     neimenggu      107.3667       40.7333           77       149     2012      07        04        186              0.000000      23.921326       0.105096       0.305386       0.166000   -9999.000000       0.260600       0.798000
53513     53513     neimenggu      107.3667       40.7333           77       149     2012      07        05        187              0.000000      27.808777       0.000000       0.290014       0.164000       0.130600       0.266400       0.846000
53513     53513     neimenggu      107.3667       40.7333           77       149     2012      07        06        188              0.000000      28.858398       0.124961       0.270642   -9999.000000   -9999.000000       0.296000       0.765000
53513     53513     neimenggu      107.3667       40.7333           77       149     2012      07        07        189              0.000000      27.017822       0.000000       0.261779   -9999.000000   -9999.000000       0.243900       0.685000
53513     53513     neimenggu      107.3667       40.7333           77       149     2012      07        08        190              0.000000      28.406006       0.000000       0.248780       0.188500   -9999.000000       0.256400       0.818000
53513     53513     neimenggu      107.3667       40.7333           77       149     2012      07        09        191              0.000000      27.206696       0.101548       0.241550       0.212000   -9999.000000       0.210400   -9999.000000
53513     53513     neimenggu      107.3667       40.7333           77       149     2012      07        10        192              0.000000      26.702972       0.069326       0.234537       0.162000       0.141000       0.235300       0.701000
53513     53513     neimenggu      107.3667       40.7333           77       149     2012      07        11        193              0.000000      29.896332       0.000000       0.219584       0.200000   -9999.000000       0.246100       0.662000
53513     53513     neimenggu      107.3667       40.7333           77       149     2012      07        12        194              0.000000      30.499512       0.073916       0.209916       0.239000   -9999.000000       0.225000       0.666000
53513     53513     neimenggu      107.3667       40.7333           77       149     2012      07        13        195              0.000000      30.825500       2.392844       0.206343       0.201000   -9999.000000       0.206300       0.748000
53513     53513     neimenggu      107.3667       40.7333           77       149     2012      07        14        196              0.000000      28.814789       0.000000       0.207529       0.180500   -9999.000000       0.225800   -9999.000000
53513     53513     neimenggu      107.3667       40.7333           77       149     2012      07        15        197              0.000000      30.304901       0.000000       0.202721       0.148000       0.188100       0.219700       0.673000
53513     53513     neimenggu      107.3667       40.7333           77       149     2012      07        16        198              0.000000      31.060822       0.056496       0.200485       0.205500       0.119300       0.231300       0.630000
53513     53513     neimenggu      107.3667       40.7333           77       149     2012      07        17        199              0.000000      32.169098      16.133511       0.199092       0.362000   -9999.000000       0.354200       0.553000
53513     53513     neimenggu      107.3667       40.7333           77       149     2012      07        18        200              0.000000      24.175018       0.000000       0.321717       0.294000   -9999.000000       0.260400       0.798000
53513     53513     neimenggu      107.3667       40.7333           77       149     2012      07        19        201              0.000000      27.067200       0.669706       0.287715       0.238000   -9999.000000       0.238300   -9999.000000
53513     53513     neimenggu      107.3667       40.7333           77       149     2012      07        20        202              0.157500      26.725769       0.485145       0.271511       0.170000   -9999.000000       0.287700       0.726000
53513     53513     neimenggu      107.3667       40.7333           77       149     2012      07        21        203              0.155458      27.373749       0.000000       0.253610       0.199000       0.197700       0.230400       0.695000
53513     53513     neimenggu      107.3667       40.7333           77       149     2012      07        22        204              0.153375      26.201782       0.000000       0.233277       0.216000   -9999.000000       0.236500       0.720000
53513     53513     neimenggu      107.3667       40.7333           77       149     2012      07        23        205              0.151708      27.754730       0.711407       0.216498       0.228000       0.242600   -9999.000000       0.778000
53513     53513     neimenggu      107.3667       40.7333           77       149     2012      07        24        206              0.148625      29.933319       2.373166       0.206411       0.226000   -9999.000000       0.263300   -9999.000000
53513     53513     neimenggu      107.3667       40.7333           77       149     2012      07        25        207              0.148250      28.582001       0.000000       0.224498       0.184000   -9999.000000       0.253100       0.733000
53513     53513     neimenggu      107.3667       40.7333           77       149     2012      07        26        208              0.147667      28.366119       0.000000       0.215679       0.135000   -9999.000000       0.207400       0.721000
53513     53513     neimenggu      107.3667       40.7333           77       149     2012      07        27        209              0.215375      30.690552      39.034176       0.201058       0.212000   -9999.000000       0.309800       0.698000
53513     53513     neimenggu      107.3667       40.7333           77       149     2012      07        28        210              0.252708      25.057281       0.000000       0.376483       0.291000       0.139700       0.317500       1.000000
53513     53513     neimenggu      107.3667       40.7333           77       149     2012      07        29        211              0.223333      25.568054       0.520770       0.323770       0.233000   -9999.000000       0.284700       0.990000
53513     53513     neimenggu      107.3667       40.7333           77       149     2012      07        30        212              0.305875      26.992889      11.246150       0.294336       0.270000   -9999.000000       0.260900       1.000000
53513     53513     neimenggu      107.3667       40.7333           77       149     2012      07        31        213              0.262167      22.934998       0.000000       0.336474       0.151000   -9999.000000       0.304600       0.842000
53513     53513     neimenggu      107.3667       40.7333           77       149     2012      08        01        214              0.220542      26.248688       3.426227       0.302703       0.160000   -9999.000000       0.303300       0.963000
53513     53513     neimenggu      107.3667       40.7333           77       149     2012      08        02        215              0.197708      25.969482       0.000000       0.294235       0.242000   -9999.000000       0.294300       0.930000
53513     53513     neimenggu      107.3667       40.7333           77       149     2012      08        03        216              0.182375      27.932495       0.363328       0.274393       0.257000       0.098300       0.302200       0.854000
53513     53513     neimenggu      107.3667       40.7333           77       149     2012      08        04        217              0.173958      29.123199       0.000000       0.256530       0.182000   -9999.000000       0.254500       0.880000
53513     53513     neimenggu      107.3667       40.7333           77       149     2012      08        05        218              0.169583      29.271393       0.000000       0.240839       0.152000   -9999.000000       0.261200       0.833000
53513     53513     neimenggu      107.3667       40.7333           77       149     2012      08        06        219              0.165958      30.323425       0.126095       0.224828       0.182000   -9999.000000       0.286100       0.841000
53513     53513     neimenggu      107.3667       40.7333           77       149     2012      08        07        220              0.160375      29.743195       1.638492       0.217705       0.251000   -9999.000000       0.284000   -9999.000000
53513     53513     neimenggu      107.3667       40.7333           77       149     2012      08        08        221              0.161583      24.903809       0.000000       0.234228       0.236000       0.156600       0.282000       0.841000
53513     53513     neimenggu      107.3667       40.7333           77       149     2012      08        09        222              0.160500      28.412506       0.000000       0.216851       0.173000   -9999.000000       0.245900       0.767000
53513     53513     neimenggu      107.3667       40.7333           77       149     2012      08        10        223              0.195792      29.735626      26.729094       0.203726       0.287000       0.130600       0.319700       0.722000
53513     53513     neimenggu      107.3667       40.7333           77       149     2012      08        11        224              0.270208      25.772125       0.000000       0.306002       0.218000   -9999.000000       0.309600       1.000000
53513     53513     neimenggu      107.3667       40.7333           77       149     2012      08        12        225              0.246417      25.000702       0.000000       0.316847       0.212500   -9999.000000       0.251800   -9999.000000
53513     53513     neimenggu      107.3667       40.7333           77       149     2012      08        13        226              0.232652      26.195251       0.529199       0.290071       0.259000       0.333200       0.275900       0.939000
53513     53513     neimenggu      107.3667       40.7333           77       149     2012      08        14        227              0.223625      26.386078       0.000000       0.273929       0.234000       0.160100       0.288800       0.866000
53513     53513     neimenggu      107.3667       40.7333           77       149     2012      08        15        228              0.217750      24.707123       0.000000       0.257813       0.175000   -9999.000000       0.253600       0.820000
53513     53513     neimenggu      107.3667       40.7333           77       149     2012      08        16        229              0.207833      26.056183       0.091622       0.241902       0.177000   -9999.000000       0.228000       0.793000
53513     53513     neimenggu      107.3667       40.7333           77       149     2012      08        17        230              0.206208      23.767181       0.333136       0.239024       0.179000   -9999.000000       0.264100   -9999.000000
53513     53513     neimenggu      107.3667       40.7333           77       149     2012      08        18        231              0.201667      25.665009       0.000000       0.230962       0.217000   -9999.000000       0.268700       0.757000
53513     53513     neimenggu      107.3667       40.7333           77       149     2012      08        19        232              0.197042      26.018555       0.043030       0.218730       0.213000   -9999.000000       0.259500       0.773000
53513     53513     neimenggu      107.3667       40.7333           77       149     2012      08        20        233              0.191208      26.014374       1.094901       0.208233       0.132000       0.144000       0.261000       0.665000
53513     53513     neimenggu      107.3667       40.7333           77       149     2012      08        21        234              0.186917      21.798035       0.000000       0.203499       0.129000   -9999.000000       0.244100       0.670000
53513     53513     neimenggu      107.3667       40.7333           77       149     2012      08        22        235              0.184875      22.504944       0.000000       0.200407       0.122000   -9999.000000       0.254000   -9999.000000
53513     53513     neimenggu      107.3667       40.7333           77       149     2012      08        23        236              0.183625      24.233215       0.000000       0.198321       0.189000   -9999.000000       0.186000       0.691000
53513     53513     neimenggu      107.3667       40.7333           77       149     2012      08        24        237              0.180500      26.716034       2.532984       0.197011   -9999.000000   -9999.000000       0.251300   -9999.000000
53513     53513     neimenggu      107.3667       40.7333           77       149     2012      08        25        238              0.000000      27.554535       0.000000       0.202724       0.198000   -9999.000000       0.274200   -9999.000000
53513     53513     neimenggu      107.3667       40.7333           77       149     2012      08        26        239              0.175625      24.065216       0.000000       0.222631       0.170000       0.156700       0.253200       0.783000
53513     53513     neimenggu      107.3667       40.7333           77       149     2012      08        27        240              0.173833      26.280731       0.000000       0.204348       0.133000   -9999.000000       0.203400       0.690000
53513     53513     neimenggu      107.3667       40.7333           77       149     2012      08        28        241              0.170542      27.633942       0.000000       0.194353       0.151000       0.147000       0.211600       0.778000
53513     53513     neimenggu      107.3667       40.7333           77       149     2012      08        29        242              0.168833      27.779358       0.000000       0.190813       0.185000   -9999.000000       0.200000       0.888000
53513     53513     neimenggu      107.3667       40.7333           77       149     2012      08        30        243              0.165375      28.716675       0.000000       0.188901       0.211000   -9999.000000       0.221000       0.753000
53513     53513     neimenggu      107.3667       40.7333           77       149     2012      08        31        244              0.163833      27.670593      11.732068       0.188931       0.239500       0.224400       0.217900       0.640000
53513     53513     neimenggu      107.3667       40.7333           77       149     2012      09        01        245              0.191583      26.464233       5.372366       0.221865       0.245000   -9999.000000       0.266300       1.000000
53513     53513     neimenggu      107.3667       40.7333           77       149     2012      09        02        246              0.198583      18.353516       2.439734       0.312185       0.191000   -9999.000000       0.222800       0.784000
53513     53513     neimenggu      107.3667       40.7333           77       149     2012      09        03        247              0.197250      18.808319       0.309797       0.294801       0.167000   -9999.000000       0.237400       0.818000
53513     53513     neimenggu      107.3667       40.7333           77       149     2012      09        04        248              0.195250      19.006470       0.000000       0.270153   -9999.000000   -9999.000000       0.222000       0.793000
53513     53513     neimenggu      107.3667       40.7333           77       149     2012      09        05        249              0.193625      19.419006       0.000000       0.251725       0.140000   -9999.000000       0.222300   -9999.000000
53513     53513     neimenggu      107.3667       40.7333           77       149     2012      09        06        250              0.191417      21.015808       0.000000       0.236566       0.128000   -9999.000000       0.215200       0.821000
53513     53513     neimenggu      107.3667       40.7333           77       149     2012      09        07        251              0.189375      22.115997       0.000000       0.222274       0.143000       0.128500       0.197400       0.723000
53513     53513     neimenggu      107.3667       40.7333           77       149     2012      09        08        252              0.186958      22.298584       0.000000       0.212385       0.171000   -9999.000000       0.217200       0.635000
53513     53513     neimenggu      107.3667       40.7333           77       149     2012      09        09        253              0.184667      23.354462       0.264998       0.204758       0.211000   -9999.000000       0.163500       0.740000
53513     53513     neimenggu      107.3667       40.7333           77       149     2012      09        10        254              0.183500      24.109711       5.498025       0.204768   -9999.000000   -9999.000000       0.186500   -9999.000000
53513     53513     neimenggu      107.3667       40.7333           77       149     2012      09        11        255              0.180042      23.128632       0.161252       0.241746       0.187000       0.175000       0.222700       0.843000
53513     53513     neimenggu      107.3667       40.7333           77       149     2012      09        12        256              0.178625      16.807587       0.290959       0.253348       0.143000   -9999.000000       0.212800       0.635000
53513     53513     neimenggu      107.3667       40.7333           77       149     2012      09        13        257              0.178458      16.760345       0.000000       0.232907       0.145000   -9999.000000       0.172400       0.660000
53513     53513     neimenggu      107.3667       40.7333           77       149     2012      09        14        258              0.178208      18.361023       0.000000       0.217688       0.185000   -9999.000000       0.191700       0.615000
53513     53513     neimenggu      107.3667       40.7333           77       149     2012      09        15        259              0.177583      19.497620       8.266208       0.206894       0.205000   -9999.000000       0.186200   -9999.000000
53513     53513     neimenggu      107.3667       40.7333           77       149     2012      09        16        260              0.174917      20.133881       0.000000       0.240911       0.166000   -9999.000000       0.219600       0.885000
53513     53513     neimenggu      107.3667       40.7333           77       149     2012      09        17        261              0.173917      19.165283       0.000000       0.256964       0.152500   -9999.000000       0.192100       0.761000
53513     53513     neimenggu      107.3667       40.7333           77       149     2012      09        18        262              0.172417      19.172791       0.658617       0.241213       0.133000       0.260200       0.191700       0.478000
53513     53513     neimenggu      107.3667       40.7333           77       149     2012      09        19        263              0.171625      19.253601       0.000000       0.235879       0.160000   -9999.000000       0.170500       0.656000
53513     53513     neimenggu      107.3667       40.7333           77       149     2012      09        20        264              0.169870      19.983612       0.996792       0.222380       0.207000       0.202500       0.207100   -9999.000000
53513     53513     neimenggu      107.3667       40.7333           77       149     2012      09        21        265              0.170083      19.672455       0.000000       0.222876   -9999.000000   -9999.000000       0.196700       0.725000
53513     53513     neimenggu      107.3667       40.7333           77       149     2012      09        22        266              0.170625      19.557129       0.543068       0.221615       0.141000   -9999.000000       0.195600       0.721000
53513     53513     neimenggu      107.3667       40.7333           77       149     2012      09        23        267              0.172208      20.517822       0.316228       0.213168       0.123000   -9999.000000   -9999.000000       0.567000
53513     53513     neimenggu      107.3667       40.7333           77       149     2012      09        24        268              0.168083      22.025146       0.695292       0.206234       0.184000   -9999.000000       0.156900       0.502000
53513     53513     neimenggu      107.3667       40.7333           77       149     2012      09        25        269              0.167125      17.996643       0.076671       0.215245       0.182000   -9999.000000       0.168700       0.542000
53513     53513     neimenggu      107.3667       40.7333           77       149     2012      09        26        270              0.165042      17.502747       3.710146       0.205384   -9999.000000       0.107300       0.163200       0.669000
53513     53513     neimenggu      107.3667       40.7333           77       149     2012      09        27        271              0.165286      16.290649       0.000000       0.241502       0.129000   -9999.000000       0.172700       0.568000
53513     53513     neimenggu      107.3667       40.7333           77       149     2012      09        28        272              0.161533      12.886810       0.000000       0.229414       0.130000   -9999.000000       0.170100       0.511000
53513     53513     neimenggu      107.3667       40.7333           77       149     2012      09        29        273              0.161750      13.030731       0.000000       0.216828       0.140000   -9999.000000       0.161300       0.369000
53513     53513     neimenggu      107.3667       40.7333           77       149     2012      09        30        274              0.161292      14.053680       0.000000       0.207738       0.156000   -9999.000000       0.134300       0.410000
53513     53513     neimenggu      107.3667       40.7333           77       149     2012      10        01        275              0.160458      14.947327       0.000000       0.200708   -9999.000000   -9999.000000       0.144900       0.382000
53513     53513     neimenggu      107.3667       40.7333           77       149     2012      10        02        276              0.160000      16.653748       0.000000       0.195307       0.115000   -9999.000000       0.139200       0.485000
53513     53513     neimenggu      107.3667       40.7333           77       149     2012      10        03        277              0.159208      16.752747       1.337873       0.191620       0.133000   -9999.000000       0.149900       0.471000
53513     53513     neimenggu      107.3667       40.7333           77       149     2012      10        04        278              0.162167      16.932953       0.866415       0.195012       0.129000   -9999.000000       0.181000   -9999.000000
53513     53513     neimenggu      107.3667       40.7333           77       149     2012      10        05        279              0.165042      13.766022       0.000000       0.213257       0.126000   -9999.000000       0.160800       0.566000
53513     53513     neimenggu      107.3667       40.7333           77       149     2012      10        06        280              0.166958      14.537598       0.000000       0.205654   -9999.000000   -9999.000000       0.158600       0.514000
53513     53513     neimenggu      107.3667       40.7333           77       149     2012      10        07        281              0.167917      15.925934       0.000000       0.199138   -9999.000000   -9999.000000       0.172200       0.392000
53513     53513     neimenggu      107.3667       40.7333           77       149     2012      10        08        282              0.163000      17.372772       0.539331       0.194699       0.123000   -9999.000000       0.151100       0.527000
53513     53513     neimenggu      107.3667       40.7333           77       149     2012      10        09        283              0.162375      13.271790       0.000000       0.201136       0.104000   -9999.000000       0.145000   -9999.000000
53513     53513     neimenggu      107.3667       40.7333           77       149     2012      10        10        284              0.161708      12.970642       0.000000       0.195955       0.113000   -9999.000000   -9999.000000       0.412000
53513     53513     neimenggu      107.3667       40.7333           77       149     2012      10        11        285              0.161458      13.736542       0.000000       0.191988   -9999.000000   -9999.000000       0.139400       0.333000
53513     53513     neimenggu      107.3667       40.7333           77       149     2012      10        12        286              0.160167      15.108978       0.000000       0.188868   -9999.000000   -9999.000000       0.168700       0.452000
53513     53513     neimenggu      107.3667       40.7333           77       149     2012      10        13        287              0.158458      13.256348       0.000000       0.187351   -9999.000000   -9999.000000       0.127700       0.405000
53513     53513     neimenggu      107.3667       40.7333           77       149     2012      10        14        288              0.156250      11.412415       0.000000       0.187012   -9999.000000       0.273200       0.162500   -9999.000000
53513     53513     neimenggu      107.3667       40.7333           77       149     2012      10        15        289              0.156708      11.303955       0.214439       0.187947       0.086000   -9999.000000       0.148700       0.507000
53513     53513     neimenggu      107.3667       40.7333           77       149     2012      10        16        290              0.152917      12.939209       0.120265       0.188355   -9999.000000   -9999.000000       0.140500       0.512000
53513     53513     neimenggu      107.3667       40.7333           77       149     2012      10        17        291              0.151833       7.975555       0.082912       0.188393   -9999.000000   -9999.000000       0.122200       0.348000
53513     53513     neimenggu      107.3667       40.7333           77       149     2012      10        18        292              0.151292       8.736450       0.000000       0.188431   -9999.000000   -9999.000000       0.145000       0.402000
53513     53513     neimenggu      107.3667       40.7333           77       149     2012      10        19        293              0.151500       8.363953       0.000000       0.188199   -9999.000000       0.133700       0.154800   -9999.000000
53513     53513     neimenggu      107.3667       40.7333           77       149     2012      10        20        294              0.152000      10.138275       0.154680       0.188384   -9999.000000   -9999.000000       0.170400       0.432000
53513     53513     neimenggu      107.3667       40.7333           77       149     2012      10        21        295              0.150250      11.501770       0.000000       0.188187   -9999.000000       0.208700       0.167800       0.453000
53513     53513     neimenggu      107.3667       40.7333           77       149     2012      10        22        296              0.149167       8.411743       0.000000       0.188211   -9999.000000   -9999.000000       0.153000       0.489000
53513     53513     neimenggu      107.3667       40.7333           77       149     2012      10        23        297              0.148625       9.436646       0.000000       0.188246   -9999.000000   -9999.000000       0.177100       0.527000
53513     53513     neimenggu      107.3667       40.7333           77       149     2012      10        24        298              0.148500      10.019714       0.000000       0.187939   -9999.000000   -9999.000000       0.093900       0.498000
53513     53513     neimenggu      107.3667       40.7333           77       149     2012      10        25        299              0.000000      10.673126       0.000000       0.187051   -9999.000000   -9999.000000       0.161600       0.487000
53513     53513     neimenggu      107.3667       40.7333           77       149     2012      10        26        300              0.148208      11.141815       0.000000       0.187079   -9999.000000   -9999.000000       0.176000       0.615000
53513     53513     neimenggu      107.3667       40.7333           77       149     2012      10        27        301              0.146375      11.734894       0.000000       0.187411   -9999.000000   -9999.000000       0.157900       0.581000
53513     53513     neimenggu      107.3667       40.7333           77       149     2012      10        28        302              0.000000       9.603882       0.000000       0.187150   -9999.000000   -9999.000000       0.160600       0.429000
53513     53513     neimenggu      107.3667       40.7333           77       149     2012      10        29        303              0.143667       9.466339       0.520385       0.187781   -9999.000000   -9999.000000       0.133300       0.563000
53513     53513     neimenggu      107.3667       40.7333           77       149     2012      10        30        304              0.142542       5.380310       0.504302       0.187625   -9999.000000   -9999.000000       0.152400       0.554000
53513     53513     neimenggu      107.3667       40.7333           77       149     2012      10        31        305              0.142708       5.887177       0.095421       0.202153   -9999.000000       0.250600       0.178900       0.503000
53513     53513     neimenggu      107.3667       40.7333           77       149     2012      11        01        306              0.142917       7.213165       0.000000       0.198915   -9999.000000   -9999.000000       0.198600       0.636000
53513     53513     neimenggu      107.3667       40.7333           77       149     2012      11        02        307              0.142750       7.858063       0.036502       0.195939   -9999.000000   -9999.000000       0.142500   -9999.000000
53513     53513     neimenggu      107.3667       40.7333           77       149     2012      11        03        308              0.139667       6.428223       0.000000       0.193922   -9999.000000       0.274900       0.131600       0.335000
53513     53513     neimenggu      107.3667       40.7333           77       149     2012      11        04        309              0.138833       0.011261       0.420280       0.189887   -9999.000000   -9999.000000       0.149100       0.252000
53513     53513     neimenggu      107.3667       40.7333           77       149     2012      11        05        310              0.139167       0.674866       0.350054       0.192270   -9999.000000   -9999.000000       0.154100   -9999.000000
53513     53513     neimenggu      107.3667       40.7333           77       149     2012      11        06        311              0.139667       1.205292       0.000000       0.194342   -9999.000000       0.190800       0.175800       0.541000
53513     53513     neimenggu      107.3667       40.7333           77       149     2012      11        07        312              0.139917       3.093994       0.990395       0.196320   -9999.000000   -9999.000000       0.206100   -9999.000000
53513     53513     neimenggu      107.3667       40.7333           77       149     2012      11        08        313              0.139833       4.140228       0.000000       0.195256   -9999.000000       0.159900       0.165900       0.589000
53513     53513     neimenggu      107.3667       40.7333           77       149     2012      11        09        314              0.139208       3.526367       0.000000       0.195486   -9999.000000   -9999.000000       0.117800       0.604000
53513     53513     neimenggu      107.3667       40.7333           77       149     2012      11        10        315              0.137750       2.440247       0.192200       0.196209   -9999.000000   -9999.000000       0.084000       0.288000
53513     53513     neimenggu      107.3667       40.7333           77       149     2012      11        11        316              0.137583      -0.557953       0.000000       0.192135   -9999.000000   -9999.000000       0.128500       0.430000
53513     53513     neimenggu      107.3667       40.7333           77       149     2012      11        12        317              0.137542       0.331604       0.000000       0.192316   -9999.000000   -9999.000000       0.143900   -9999.000000
53513     53513     neimenggu      107.3667       40.7333           77       149     2012      11        13        318              0.000000       0.660034       0.000000       0.191059   -9999.000000   -9999.000000       0.116700       0.509000
53513     53513     neimenggu      107.3667       40.7333           77       149     2012      11        14        319              0.137333       0.223572       0.000000       0.191230   -9999.000000   -9999.000000       0.108500       0.417000
53513     53513     neimenggu      107.3667       40.7333           77       149     2012      11        15        320              0.136417       0.203735       0.150996       0.192544   -9999.000000   -9999.000000       0.119100       0.366000
53513     53513     neimenggu      107.3667       40.7333           77       149     2012      11        16        321              0.136667      -0.573273       0.000000       0.195194   -9999.000000   -9999.000000       0.112700       0.406000
53513     53513     neimenggu      107.3667       40.7333           77       149     2012      11        17        322              0.000000       0.680450       0.000000       0.196164   -9999.000000   -9999.000000       0.128900   -9999.000000
53513     53513     neimenggu      107.3667       40.7333           77       149     2012      11        18        323              0.137708       1.237457       0.000000       0.198531   -9999.000000       0.120200       0.130200       0.645000
53513     53513     neimenggu      107.3667       40.7333           77       149     2012      11        19        324              0.136917       1.526337       0.000000       0.196057   -9999.000000   -9999.000000       0.122500       0.541000
53513     53513     neimenggu      107.3667       40.7333           77       149     2012      11        20        325              0.137000       0.492065       0.000000       0.195446   -9999.000000   -9999.000000       0.109900       0.587000
53513     53513     neimenggu      107.3667       40.7333           77       149     2012      11        21        326              0.136917       0.061340       0.000000       0.195181   -9999.000000       0.192100       0.111600       0.530000
53513     53513     neimenggu      107.3667       40.7333           77       149     2012      11        22        327              0.136583       0.389709       0.000000       0.197560   -9999.000000   -9999.000000       0.120100       0.612000
53513     53513     neimenggu      107.3667       40.7333           77       149     2012      11        23        328              0.135792      -1.342041       0.000000       0.193062   -9999.000000   -9999.000000       0.116100       0.367000
53513     53513     neimenggu      107.3667       40.7333           77       149     2012      11        24        329              0.135792      -2.574066       0.000000       0.189612   -9999.000000   -9999.000000   -9999.000000       0.437000
53513     53513     neimenggu      107.3667       40.7333           77       149     2012      11        25        330              0.136083      -1.369354       0.000000       0.191823   -9999.000000   -9999.000000       0.102500       0.361000
53513     53513     neimenggu      107.3667       40.7333           77       149     2012      11        26        331              0.135917      -3.200928       0.330998       0.187779   -9999.000000   -9999.000000   -9999.000000       0.227000
53513     53513     neimenggu      107.3667       40.7333           77       149     2012      11        27        332              0.135417      -1.702179       0.116582       0.190750   -9999.000000   -9999.000000   -9999.000000       0.346000
53513     53513     neimenggu      107.3667       40.7333           77       149     2012      11        28        333              0.132583      -3.840332       0.000000       0.186742   -9999.000000   -9999.000000       0.102600       0.137000
53513     53513     neimenggu      107.3667       40.7333           77       149     2012      11        29        334              0.130958      -5.155090       0.000000       0.180845   -9999.000000   -9999.000000       0.102700       0.245000
53513     53513     neimenggu      107.3667       40.7333           77       149     2012      11        30        335              0.131667      -5.075500       0.000000       0.180489   -9999.000000   -9999.000000       0.104100       0.289000
53513     53513     neimenggu      107.3667       40.7333           77       149     2012      12        01        336              0.132750      -4.707001       0.199005       0.180387   -9999.000000   -9999.000000       0.077600   -9999.000000
53513     53513     neimenggu      107.3667       40.7333           77       149     2012      12        02        337              0.131917      -3.582001       0.000000       0.185555   -9999.000000   -9999.000000       0.099000       0.199000
53513     53513     neimenggu      107.3667       40.7333           77       149     2012      12        03        338              0.131500      -4.390167       0.000000       0.183918   -9999.000000   -9999.000000       0.091700       0.107000
53513     53513     neimenggu      107.3667       40.7333           77       149     2012      12        04        339              0.131167      -4.727234       0.000000       0.181656   -9999.000000   -9999.000000       0.097100       0.137000
53513     53513     neimenggu      107.3667       40.7333           77       149     2012      12        05        340              0.130125      -5.337982       0.000000       0.179418   -9999.000000   -9999.000000       0.098300       0.281000
53513     53513     neimenggu      107.3667       40.7333           77       149     2012      12        06        341              0.130125      -5.725189       0.000000       0.177378   -9999.000000   -9999.000000       0.090800   -9999.000000
53513     53513     neimenggu      107.3667       40.7333           77       149     2012      12        07        342              0.129208      -5.861938       0.000000       0.176675   -9999.000000   -9999.000000       0.093400       0.218000
53513     53513     neimenggu      107.3667       40.7333           77       149     2012      12        08        343              0.127500      -7.674011       0.000000       0.174129   -9999.000000   -9999.000000   -9999.000000       0.031000
53513     53513     neimenggu      107.3667       40.7333           77       149     2012      12        09        344              0.127750      -9.098938       0.000000       0.166480   -9999.000000   -9999.000000       0.086400       0.024000
53513     53513     neimenggu      107.3667       40.7333           77       149     2012      12        10        345              0.127750      -8.447998       0.000000       0.166868   -9999.000000   -9999.000000       0.088400       0.119000
53513     53513     neimenggu      107.3667       40.7333           77       149     2012      12        11        346              0.127583      -6.898102       0.000000       0.173052   -9999.000000   -9999.000000       0.083100   -9999.000000
53513     53513     neimenggu      107.3667       40.7333           77       149     2012      12        12        347              0.128083      -7.836395       0.000000       0.169542   -9999.000000   -9999.000000       0.077500       0.231000
53513     53513     neimenggu      107.3667       40.7333           77       149     2012      12        13        348              0.130083      -5.868866       0.000000       0.174238   -9999.000000   -9999.000000       0.092500       0.125000
53513     53513     neimenggu      107.3667       40.7333           77       149     2012      12        14        349              0.130333      -3.750214       0.000000       0.185619   -9999.000000   -9999.000000       0.063300       0.080000
53513     53513     neimenggu      107.3667       40.7333           77       149     2012      12        15        350              0.000000      -3.404999       0.000000       0.187296   -9999.000000   -9999.000000       0.094900       0.204000
53513     53513     neimenggu      107.3667       40.7333           77       149     2012      12        16        351              0.130500      -2.995209       0.000000       0.190876   -9999.000000   -9999.000000       0.091200   -9999.000000
53513     53513     neimenggu      107.3667       40.7333           77       149     2012      12        17        352              0.128583      -4.205292       0.000000       0.188545   -9999.000000   -9999.000000       0.091200       0.163000
53513     53513     neimenggu      107.3667       40.7333           77       149     2012      12        18        353              0.128250      -7.338959       0.000000       0.171822   -9999.000000   -9999.000000       0.073200       0.143000
53513     53513     neimenggu      107.3667       40.7333           77       149     2012      12        19        354              0.127667      -8.152863       0.000000       0.169015   -9999.000000   -9999.000000       0.090300       0.110000
53513     53513     neimenggu      107.3667       40.7333           77       149     2012      12        20        355              0.000000      -6.890045       0.000000       0.171057   -9999.000000   -9999.000000       0.084200       0.059000
53513     53513     neimenggu      107.3667       40.7333           77       149     2012      12        21        356              0.127583      -7.409698       0.000000       0.171270   -9999.000000   -9999.000000       0.077700       0.036000
53513     53513     neimenggu      107.3667       40.7333           77       149     2012      12        22        357              0.125542      -8.917175       0.000000       0.168147   -9999.000000   -9999.000000       0.082300       0.023000
53513     53513     neimenggu      107.3667       40.7333           77       149     2012      12        23        358              0.124000     -13.342773       0.000000       0.164183   -9999.000000   -9999.000000       0.089400       0.010000
53513     53513     neimenggu      107.3667       40.7333           77       149     2012      12        24        359              0.123700     -14.003754       0.000000       0.161881   -9999.000000   -9999.000000       0.090900       0.093000
53513     53513     neimenggu      107.3667       40.7333           77       149     2012      12        25        360              0.123875     -13.365570       0.000000       0.161594   -9999.000000   -9999.000000       0.026100       0.043000
53513     53513     neimenggu      107.3667       40.7333           77       149     2012      12        26        361              0.000000     -12.450470       0.000000       0.161943   -9999.000000   -9999.000000       0.088100       0.162000
53513     53513     neimenggu      107.3667       40.7333           77       149     2012      12        27        362              0.124818     -11.185913       0.000000       0.162770   -9999.000000   -9999.000000       0.091500       0.033000
53513     53513     neimenggu      107.3667       40.7333           77       149     2012      12        28        363              0.126000      -8.662811       0.000000       0.163815   -9999.000000   -9999.000000       0.083300       0.094000
53513     53513     neimenggu      107.3667       40.7333           77       149     2012      12        29        364              0.000000     -11.036591       0.000000       0.164148   -9999.000000   -9999.000000       0.074000       0.026000
53513     53513     neimenggu      107.3667       40.7333           77       149     2012      12        30        365              0.000000     -10.722321       0.000000       0.163412   -9999.000000   -9999.000000       0.091600   -9999.000000
53513     53513     neimenggu      107.3667       40.7333           77       149     2012      12        31        366              0.125000      -9.392090       0.000000       0.163411   -9999.000000   -9999.000000       0.074100       0.078000
