# Supplementary material for: Research on Fusing Multisatellite Soil Moisture Data Based on Bayesian Model Averaging
Source: Hindawi journal article supplement (doi:10.1155/2018/9310838), 2018-06-25
Supplement: f1 [file 9310838.f1.zip › 2012_sm00-10cm_daily_ZDB_ZHY_53553_366days_allin.txt]

53553     53553     neimenggu      111.2189       39.8542           81       165     2012      01        01        001              0.000000   -9999.000000       0.000000   -9999.000000   -9999.000000   -9999.000000       0.050100   -9999.000000
53553     53553     neimenggu      111.2189       39.8542           81       165     2012      01        02        002              0.000000      -7.127075       0.000000       0.109872   -9999.000000   -9999.000000       0.054000       0.133000
53553     53553     neimenggu      111.2189       39.8542           81       165     2012      01        03        003              0.000000      -9.376465       0.000000       0.105824   -9999.000000   -9999.000000       0.051800       0.070000
53553     53553     neimenggu      111.2189       39.8542           81       165     2012      01        04        004              0.000000     -11.548584       0.000000       0.104786   -9999.000000   -9999.000000       0.047600       0.140000
53553     53553     neimenggu      111.2189       39.8542           81       165     2012      01        05        005              0.000000     -11.238159       1.756725       0.104383   -9999.000000   -9999.000000       0.055600       0.115000
53553     53553     neimenggu      111.2189       39.8542           81       165     2012      01        06        006              0.000000     -11.302338       0.293779       0.105876   -9999.000000   -9999.000000       0.051400       0.208000
53553     53553     neimenggu      111.2189       39.8542           81       165     2012      01        07        007              0.000000      -9.184509       0.087576       0.105678   -9999.000000   -9999.000000       0.055800       0.336000
53553     53553     neimenggu      111.2189       39.8542           81       165     2012      01        08        008              0.000000      -8.387207       0.000000       0.107002   -9999.000000   -9999.000000       0.055600   -9999.000000
53553     53553     neimenggu      111.2189       39.8542           81       165     2012      01        09        009              0.000000      -8.629181       0.000000       0.107297   -9999.000000   -9999.000000   -9999.000000       0.069000
53553     53553     neimenggu      111.2189       39.8542           81       165     2012      01        10        010              0.000000      -7.998291       0.000000       0.108127   -9999.000000   -9999.000000       0.050000       0.315000
53553     53553     neimenggu      111.2189       39.8542           81       165     2012      01        11        011              0.000000      -8.690277       0.000000       0.106770   -9999.000000   -9999.000000       0.050000       0.198000
53553     53553     neimenggu      111.2189       39.8542           81       165     2012      01        12        012              0.000000      -8.857971       0.597426       0.105359   -9999.000000   -9999.000000       0.048800       0.287000
53553     53553     neimenggu      111.2189       39.8542           81       165     2012      01        13        013              0.000000      -8.568939       0.793265       0.107599   -9999.000000   -9999.000000       0.048500   -9999.000000
53553     53553     neimenggu      111.2189       39.8542           81       165     2012      01        14        014              0.000000      -8.017700       0.000000       0.108164   -9999.000000   -9999.000000   -9999.000000       0.035000
53553     53553     neimenggu      111.2189       39.8542           81       165     2012      01        15        015              0.000000      -7.145325       0.000000       0.112379   -9999.000000   -9999.000000       0.048800       0.095000
53553     53553     neimenggu      111.2189       39.8542           81       165     2012      01        16        016              0.000000      -6.662964       0.000000       0.121029   -9999.000000   -9999.000000       0.056000       0.253000
53553     53553     neimenggu      111.2189       39.8542           81       165     2012      01        17        017              0.000000      -6.104706       0.000000       0.126345   -9999.000000   -9999.000000       0.050400       0.301000
53553     53553     neimenggu      111.2189       39.8542           81       165     2012      01        18        018              0.000000      -6.588135       0.000000       0.124898   -9999.000000   -9999.000000       0.054100   -9999.000000
53553     53553     neimenggu      111.2189       39.8542           81       165     2012      01        19        019              0.000000      -5.613037       0.000000       0.124654   -9999.000000   -9999.000000       0.058800       0.248000
53553     53553     neimenggu      111.2189       39.8542           81       165     2012      01        20        020              0.000000      -6.065002       0.000000       0.121608   -9999.000000   -9999.000000       0.047400       0.184000
53553     53553     neimenggu      111.2189       39.8542           81       165     2012      01        21        021              0.000000     -10.446442       0.000000       0.110113   -9999.000000   -9999.000000       0.046600       0.248000
53553     53553     neimenggu      111.2189       39.8542           81       165     2012      01        22        022              0.000000     -12.586395       0.000000       0.105971   -9999.000000   -9999.000000       0.050000       0.130000
53553     53553     neimenggu      111.2189       39.8542           81       165     2012      01        23        023              0.000000     -12.967651       0.000000       0.104315   -9999.000000   -9999.000000       0.051800   -9999.000000
53553     53553     neimenggu      111.2189       39.8542           81       165     2012      01        24        024              0.000000     -12.013794       0.000000       0.104376   -9999.000000   -9999.000000   -9999.000000       0.292000
53553     53553     neimenggu      111.2189       39.8542           81       165     2012      01        25        025              0.000000     -10.530090       0.000000       0.104845   -9999.000000   -9999.000000       0.059300       0.146000
53553     53553     neimenggu      111.2189       39.8542           81       165     2012      01        26        026              0.000000      -9.035431       0.000000       0.105872   -9999.000000   -9999.000000       0.055200       0.268000
53553     53553     neimenggu      111.2189       39.8542           81       165     2012      01        27        027              0.000000      -7.717896       0.000000       0.112866   -9999.000000   -9999.000000       0.059500       0.164000
53553     53553     neimenggu      111.2189       39.8542           81       165     2012      01        28        028              0.000000      -6.624969       0.000000       0.123516   -9999.000000   -9999.000000       0.054900   -9999.000000
53553     53553     neimenggu      111.2189       39.8542           81       165     2012      01        29        029              0.000000      -8.218140       0.000000       0.112335   -9999.000000   -9999.000000       0.051700       0.280000
53553     53553     neimenggu      111.2189       39.8542           81       165     2012      01        30        030              0.000000      -7.571259       0.000000       0.117967   -9999.000000   -9999.000000       0.057500       0.414000
53553     53553     neimenggu      111.2189       39.8542           81       165     2012      01        31        031              0.000000      -6.045074       0.000000       0.126460   -9999.000000   -9999.000000   -9999.000000       0.264000
53553     53553     neimenggu      111.2189       39.8542           81       165     2012      02        01        032              0.000000      -7.588470       0.000000       0.121728   -9999.000000   -9999.000000       0.053500       0.244000
53553     53553     neimenggu      111.2189       39.8542           81       165     2012      02        02        033              0.000000     -11.005066       0.000000       0.106038   -9999.000000   -9999.000000       0.059400       0.317000
53553     53553     neimenggu      111.2189       39.8542           81       165     2012      02        03        034              0.000000     -10.029114       0.000000       0.105447   -9999.000000   -9999.000000       0.052300       0.065000
53553     53553     neimenggu      111.2189       39.8542           81       165     2012      02        04        035              0.000000      -8.604919       0.000000       0.111985   -9999.000000   -9999.000000       0.054100       0.345000
53553     53553     neimenggu      111.2189       39.8542           81       165     2012      02        05        036              0.000000      -6.593384       0.000000       0.119606   -9999.000000   -9999.000000       0.059000       0.330000
53553     53553     neimenggu      111.2189       39.8542           81       165     2012      02        06        037              0.000000      -5.182434       0.000000       0.133512   -9999.000000   -9999.000000       0.050200       0.229000
53553     53553     neimenggu      111.2189       39.8542           81       165     2012      02        07        038              0.000000     -10.923889       0.000000       0.107857   -9999.000000   -9999.000000       0.053200       0.288000
53553     53553     neimenggu      111.2189       39.8542           81       165     2012      02        08        039              0.000000     -10.882050       0.000000       0.105989   -9999.000000   -9999.000000       0.055100       0.140000
53553     53553     neimenggu      111.2189       39.8542           81       165     2012      02        09        040              0.000000      -9.468536       0.000000       0.107029   -9999.000000   -9999.000000       0.053100       0.373000
53553     53553     neimenggu      111.2189       39.8542           81       165     2012      02        10        041              0.000000      -9.079865       0.000000       0.110666   -9999.000000   -9999.000000       0.060000       0.338000
53553     53553     neimenggu      111.2189       39.8542           81       165     2012      02        11        042              0.000000      -7.296204       0.000000       0.119682   -9999.000000   -9999.000000       0.058100   -9999.000000
53553     53553     neimenggu      111.2189       39.8542           81       165     2012      02        12        043              0.000000      -4.713379       0.000000       0.135001   -9999.000000   -9999.000000   -9999.000000       0.237000
53553     53553     neimenggu      111.2189       39.8542           81       165     2012      02        13        044              0.000000      -3.569824       0.000000       0.137596       0.076000   -9999.000000   -9999.000000       0.208000
53553     53553     neimenggu      111.2189       39.8542           81       165     2012      02        14        045              0.000000      -2.558411       0.000000       0.159638       0.081000   -9999.000000   -9999.000000       0.299000
53553     53553     neimenggu      111.2189       39.8542           81       165     2012      02        15        046              0.000000      -3.214661       0.000000       0.158987   -9999.000000   -9999.000000       0.049700       0.266000
53553     53553     neimenggu      111.2189       39.8542           81       165     2012      02        16        047              0.000000      -5.429474       0.000000       0.139422   -9999.000000   -9999.000000       0.059300   -9999.000000
53553     53553     neimenggu      111.2189       39.8542           81       165     2012      02        17        048              0.000000      -7.750458       0.000000       0.117024   -9999.000000   -9999.000000   -9999.000000       0.185000
53553     53553     neimenggu      111.2189       39.8542           81       165     2012      02        18        049              0.000000      -7.919922       0.000000       0.116673       0.076000   -9999.000000       0.053800       0.313000
53553     53553     neimenggu      111.2189       39.8542           81       165     2012      02        19        050              0.000000      -6.732117       0.312707       0.126052       0.083000   -9999.000000       0.054600       0.462000
53553     53553     neimenggu      111.2189       39.8542           81       165     2012      02        20        051              0.000000      -3.970703       0.000000       0.145165       0.084000   -9999.000000       0.053400       0.281000
53553     53553     neimenggu      111.2189       39.8542           81       165     2012      02        21        052              0.000000      -0.652313       0.000000       0.175020   -9999.000000   -9999.000000   -9999.000000   -9999.000000
53553     53553     neimenggu      111.2189       39.8542           81       165     2012      02        22        053              0.000000       2.177124       0.000000       0.208042   -9999.000000   -9999.000000       0.058500       0.278000
53553     53553     neimenggu      111.2189       39.8542           81       165     2012      02        23        054              0.000000       0.526825       0.000000       0.189354       0.078000   -9999.000000       0.055300       0.228000
53553     53553     neimenggu      111.2189       39.8542           81       165     2012      02        24        055              0.000000       1.553162       4.956677       0.201897       0.084000   -9999.000000       0.051100       0.332000
53553     53553     neimenggu      111.2189       39.8542           81       165     2012      02        25        056              0.000000      -1.698334       0.000000       0.175260   -9999.000000   -9999.000000       0.056600       0.258000
53553     53553     neimenggu      111.2189       39.8542           81       165     2012      02        26        057              0.000000      -4.371246       0.000000       0.136273   -9999.000000   -9999.000000       0.052500   -9999.000000
53553     53553     neimenggu      111.2189       39.8542           81       165     2012      02        27        058              0.000000      -2.312988       0.000000       0.163930   -9999.000000   -9999.000000   -9999.000000       0.264000
53553     53553     neimenggu      111.2189       39.8542           81       165     2012      02        28        059              0.000000      -0.218445       0.000000       0.176834       0.084000       0.056100   -9999.000000       0.363000
53553     53553     neimenggu      111.2189       39.8542           81       165     2012      02        29        060              0.000000   -9999.000000       0.000000   -9999.000000       0.083000   -9999.000000   -9999.000000   -9999.000000
53553     53553     neimenggu      111.2189       39.8542           81       165     2012      03        01        061              0.000000       1.925476       0.000000       0.206308       0.082000   -9999.000000       0.050000       0.295000
53553     53553     neimenggu      111.2189       39.8542           81       165     2012      03        02        062              0.000000       1.626984       0.000000       0.198834   -9999.000000       0.059700       0.049900       0.278000
53553     53553     neimenggu      111.2189       39.8542           81       165     2012      03        03        063              0.000000       2.138367       0.031520       0.214690   -9999.000000   -9999.000000       0.056800       0.247000
53553     53553     neimenggu      111.2189       39.8542           81       165     2012      03        04        064              0.000000       1.298035       0.142804       0.206021       0.089000       0.136000       0.062800       0.426000
53553     53553     neimenggu      111.2189       39.8542           81       165     2012      03        05        065              0.000000       0.964020       0.533643       0.202471   -9999.000000   -9999.000000       0.059000       0.327000
53553     53553     neimenggu      111.2189       39.8542           81       165     2012      03        06        066              0.000000      -2.882629       0.000000       0.157853       0.091000   -9999.000000       0.053600       0.355000
53553     53553     neimenggu      111.2189       39.8542           81       165     2012      03        07        067              0.000000      -0.987915       0.000000       0.173103       0.086000       0.032100       0.058100       0.374000
53553     53553     neimenggu      111.2189       39.8542           81       165     2012      03        08        068              0.000000      -1.052460       0.091977       0.173332   -9999.000000   -9999.000000       0.057500       0.187000
53553     53553     neimenggu      111.2189       39.8542           81       165     2012      03        09        069              0.000000      -1.121216       0.000000       0.171170       0.079000   -9999.000000       0.061900       0.362000
53553     53553     neimenggu      111.2189       39.8542           81       165     2012      03        10        070              0.000000       0.944183       0.000000       0.192795       0.074000   -9999.000000       0.055000       0.324000
53553     53553     neimenggu      111.2189       39.8542           81       165     2012      03        11        071              0.000000      -1.659668       0.000000       0.172315       0.081000   -9999.000000       0.058000   -9999.000000
53553     53553     neimenggu      111.2189       39.8542           81       165     2012      03        12        072              0.000000      -1.248596       0.000000       0.168619       0.079000   -9999.000000       0.049700       0.300000
53553     53553     neimenggu      111.2189       39.8542           81       165     2012      03        13        073              0.000000       1.007568       0.000000       0.187393   -9999.000000   -9999.000000       0.053900       0.308000
53553     53553     neimenggu      111.2189       39.8542           81       165     2012      03        14        074              0.000000       2.595917       0.000000       0.198303   -9999.000000   -9999.000000   -9999.000000       0.353000
53553     53553     neimenggu      111.2189       39.8542           81       165     2012      03        15        075              0.000000       4.576508       2.777130       0.217833   -9999.000000   -9999.000000       0.091300       0.802000
53553     53553     neimenggu      111.2189       39.8542           81       165     2012      03        16        076              0.000000       2.361786       0.102345       0.242442       0.102000   -9999.000000   -9999.000000   -9999.000000
53553     53553     neimenggu      111.2189       39.8542           81       165     2012      03        17        077              0.000000       5.860229       0.209260       0.250462       0.090000       0.095300       0.057100       0.607000
53553     53553     neimenggu      111.2189       39.8542           81       165     2012      03        18        078              0.000000       5.065674       0.000000       0.232369   -9999.000000   -9999.000000       0.066800       0.339000
53553     53553     neimenggu      111.2189       39.8542           81       165     2012      03        19        079              0.000000       3.253021       0.125299       0.223833   -9999.000000   -9999.000000       0.064400       0.562000
53553     53553     neimenggu      111.2189       39.8542           81       165     2012      03        20        080              0.000000       4.986694       0.140531       0.234165       0.092000       0.030800       0.063800       0.375000
53553     53553     neimenggu      111.2189       39.8542           81       165     2012      03        21        081              0.000000       6.183685       0.068487       0.238830   -9999.000000   -9999.000000       0.089100   -9999.000000
53553     53553     neimenggu      111.2189       39.8542           81       165     2012      03        22        082              0.000000       2.837463       0.259449       0.237047   -9999.000000   -9999.000000       0.063500       0.718000
53553     53553     neimenggu      111.2189       39.8542           81       165     2012      03        23        083              0.000000       4.108215       0.650890       0.236306   -9999.000000   -9999.000000       0.058300       0.338000
53553     53553     neimenggu      111.2189       39.8542           81       165     2012      03        24        084              0.000000       3.688232       0.000000       0.223844   -9999.000000   -9999.000000   -9999.000000       0.496000
53553     53553     neimenggu      111.2189       39.8542           81       165     2012      03        25        085              0.000000       6.341095       0.463956       0.232723       0.085000   -9999.000000       0.060400       0.267000
53553     53553     neimenggu      111.2189       39.8542           81       165     2012      03        26        086              0.000000       7.831177       0.344946       0.237139       0.072000   -9999.000000       0.067900   -9999.000000
53553     53553     neimenggu      111.2189       39.8542           81       165     2012      03        27        087              0.000000       8.967987       0.121477       0.240129       0.079000   -9999.000000       0.066200       0.404000
53553     53553     neimenggu      111.2189       39.8542           81       165     2012      03        28        088              0.000000       9.693481       0.429709       0.239682       0.076000       0.041800       0.094100       0.762000
53553     53553     neimenggu      111.2189       39.8542           81       165     2012      03        29        089              0.000000      10.722656       0.000000       0.240306   -9999.000000       0.077200       0.061300       0.408000
53553     53553     neimenggu      111.2189       39.8542           81       165     2012      03        30        090              0.000000       8.621765       0.000000       0.226086       0.089000       0.036400       0.071600       0.197000
53553     53553     neimenggu      111.2189       39.8542           81       165     2012      03        31        091              0.000000       5.035187       0.073076       0.227093       0.082000   -9999.000000       0.065200       0.362000
53553     53553     neimenggu      111.2189       39.8542           81       165     2012      04        01        092              0.000000       8.496216       0.000000       0.232581       0.083000   -9999.000000       0.068800       0.341000
53553     53553     neimenggu      111.2189       39.8542           81       165     2012      04        02        093              0.000000       9.448303       0.101773       0.232443       0.078000       0.015200   -9999.000000       0.292000
53553     53553     neimenggu      111.2189       39.8542           81       165     2012      04        03        094              0.000000       5.965576       0.000000       0.212865   -9999.000000   -9999.000000       0.058900       0.344000
53553     53553     neimenggu      111.2189       39.8542           81       165     2012      04        04        095              0.000000       7.964630       0.000000       0.225279   -9999.000000       0.154600       0.071300   -9999.000000
53553     53553     neimenggu      111.2189       39.8542           81       165     2012      04        05        096              0.000000      10.018585       0.000000       0.223097       0.082000   -9999.000000       0.059800       0.327000
53553     53553     neimenggu      111.2189       39.8542           81       165     2012      04        06        097              0.000000      10.343933       0.000000       0.220084       0.086000   -9999.000000       0.062800       0.262000
53553     53553     neimenggu      111.2189       39.8542           81       165     2012      04        07        098              0.000000      12.472443       0.000000       0.215442       0.073000       0.092900       0.063600       0.481000
53553     53553     neimenggu      111.2189       39.8542           81       165     2012      04        08        099              0.000000      13.273071       0.000000       0.210693       0.071000   -9999.000000       0.078000       0.364000
53553     53553     neimenggu      111.2189       39.8542           81       165     2012      04        09        100              0.000000      14.584259       0.000000       0.205704       0.072000   -9999.000000       0.058900   -9999.000000
53553     53553     neimenggu      111.2189       39.8542           81       165     2012      04        10        101              0.000000      15.368195       0.000000       0.204525       0.073000   -9999.000000       0.068400       0.345000
53553     53553     neimenggu      111.2189       39.8542           81       165     2012      04        11        102              0.000000      13.452576       0.695292       0.202144   -9999.000000   -9999.000000       0.075800       0.399000
53553     53553     neimenggu      111.2189       39.8542           81       165     2012      04        12        103              0.000000       5.185089       0.000000       0.211758       0.078000       0.012100       0.064600       0.405000
53553     53553     neimenggu      111.2189       39.8542           81       165     2012      04        13        104              0.000000      12.095734       0.000000       0.212367       0.068000   -9999.000000       0.060400       0.432000
53553     53553     neimenggu      111.2189       39.8542           81       165     2012      04        14        105              0.000000      14.353668       0.000000       0.204688       0.061000       0.074600       0.059400   -9999.000000
53553     53553     neimenggu      111.2189       39.8542           81       165     2012      04        15        106              0.000000      15.045074       0.000000       0.198641       0.076000       0.041900       0.058500       0.300000
53553     53553     neimenggu      111.2189       39.8542           81       165     2012      04        16        107              0.000000      14.240906       0.000000       0.193789       0.065500   -9999.000000       0.068000       0.310000
53553     53553     neimenggu      111.2189       39.8542           81       165     2012      04        17        108              0.000000      15.095612       0.000000       0.189274       0.074000   -9999.000000       0.061600       0.384000
53553     53553     neimenggu      111.2189       39.8542           81       165     2012      04        18        109              0.000000      17.638824      19.349993       0.185872       0.072000   -9999.000000   -9999.000000       0.794000
53553     53553     neimenggu      111.2189       39.8542           81       165     2012      04        19        110              0.000000      14.050415       0.000000       0.300645       0.072000       0.087800   -9999.000000   -9999.000000
53553     53553     neimenggu      111.2189       39.8542           81       165     2012      04        20        111              0.000000      13.882965       0.461368       0.274722       0.082000       0.031200       0.087700       0.285000
53553     53553     neimenggu      111.2189       39.8542           81       165     2012      04        21        112              0.000000      15.165283       0.000000       0.260757       0.068500   -9999.000000       0.071400       0.416000
53553     53553     neimenggu      111.2189       39.8542           81       165     2012      04        22        113              0.000000      16.529266       0.000000       0.249103       0.074000   -9999.000000   -9999.000000       0.407000
53553     53553     neimenggu      111.2189       39.8542           81       165     2012      04        23        114              0.000000      19.911530      10.729444       0.236372       0.069000   -9999.000000       0.066200       1.000000
53553     53553     neimenggu      111.2189       39.8542           81       165     2012      04        24        115              0.000000      18.368317       0.000000       0.276215   -9999.000000   -9999.000000       0.076800   -9999.000000
53553     53553     neimenggu      111.2189       39.8542           81       165     2012      04        25        116              0.000000      12.706635       0.000000       0.272206   -9999.000000       0.105200       0.076900       0.255000
53553     53553     neimenggu      111.2189       39.8542           81       165     2012      04        26        117              0.000000      11.941101       0.000000       0.258020       0.067500   -9999.000000       0.065800       0.205000
53553     53553     neimenggu      111.2189       39.8542           81       165     2012      04        27        118              0.000000      15.888763       0.000000       0.246661       0.069000       0.178400   -9999.000000       0.466000
53553     53553     neimenggu      111.2189       39.8542           81       165     2012      04        28        119              0.000000      14.578827       0.580013       0.237956       0.071000   -9999.000000       0.062300       0.278000
53553     53553     neimenggu      111.2189       39.8542           81       165     2012      04        29        120              0.000000      17.841858       0.000000       0.229153       0.067000   -9999.000000       0.070900       0.256000
53553     53553     neimenggu      111.2189       39.8542           81       165     2012      04        30        121              0.000000      21.443726       9.110888       0.220911       0.108000       0.034000   -9999.000000       0.926000
53553     53553     neimenggu      111.2189       39.8542           81       165     2012      05        01        122              0.000000      18.929626       0.117337       0.256727       0.073500   -9999.000000       0.080100       0.346000
53553     53553     neimenggu      111.2189       39.8542           81       165     2012      05        02        123              0.000000      19.078583       0.000000       0.266139       0.067000       0.204200       0.069200       0.492000
53553     53553     neimenggu      111.2189       39.8542           81       165     2012      05        03        124              0.000000      20.129456       0.000000       0.246413       0.069000   -9999.000000       0.076600   -9999.000000
53553     53553     neimenggu      111.2189       39.8542           81       165     2012      05        04        125              0.000000      20.836060       0.000000       0.232017       0.061000   -9999.000000       0.064800       0.264000
53553     53553     neimenggu      111.2189       39.8542           81       165     2012      05        05        126              0.000000      22.482178       0.000000       0.218192       0.058000       0.089100       0.070000       0.349000
53553     53553     neimenggu      111.2189       39.8542           81       165     2012      05        06        127              0.000000      22.049164       0.000000       0.206236       0.066000   -9999.000000   -9999.000000       0.512000
53553     53553     neimenggu      111.2189       39.8542           81       165     2012      05        07        128              0.000000      24.142029       0.939536       0.196810   -9999.000000   -9999.000000       0.076600       0.413000
53553     53553     neimenggu      111.2189       39.8542           81       165     2012      05        08        129              0.000000      23.015320       0.142922       0.202640       0.072000       0.058000       0.080700   -9999.000000
53553     53553     neimenggu      111.2189       39.8542           81       165     2012      05        09        130              0.000000      24.563049       0.276076       0.195050       0.067000   -9999.000000       0.074300       0.335000
53553     53553     neimenggu      111.2189       39.8542           81       165     2012      05        10        131              0.000000      22.099701       7.439430       0.195097       0.127000   -9999.000000       0.069900       0.451000
53553     53553     neimenggu      111.2189       39.8542           81       165     2012      05        11        132              0.000000      23.807129       0.528671       0.220953       0.089000   -9999.000000       0.100500       0.849000
53553     53553     neimenggu      111.2189       39.8542           81       165     2012      05        12        133              0.000000      18.014435       0.000000       0.254188       0.066000   -9999.000000       0.078500       0.530000
53553     53553     neimenggu      111.2189       39.8542           81       165     2012      05        13        134              0.000000      17.075073       0.122524       0.231730       0.069000       0.162200       0.071300   -9999.000000
53553     53553     neimenggu      111.2189       39.8542           81       165     2012      05        14        135              0.000000      15.298798       0.000000       0.221104       0.064000   -9999.000000       0.077600       0.411000
53553     53553     neimenggu      111.2189       39.8542           81       165     2012      05        15        136              0.000000      15.698944       0.066216       0.212455       0.063000       0.200200       0.069900       0.332000
53553     53553     neimenggu      111.2189       39.8542           81       165     2012      05        16        137              0.000000      18.377625       0.000000       0.204098       0.059000   -9999.000000       0.073700       0.438000
53553     53553     neimenggu      111.2189       39.8542           81       165     2012      05        17        138              0.000000      18.983276       0.000000       0.195991       0.061500   -9999.000000       0.074000       0.364000
53553     53553     neimenggu      111.2189       39.8542           81       165     2012      05        18        139              0.000000      22.600372       1.154381       0.185575       0.062000       0.100000       0.086100   -9999.000000
53553     53553     neimenggu      111.2189       39.8542           81       165     2012      05        19        140              0.000000      21.393616       0.092344       0.193304       0.067000   -9999.000000       0.080300       0.427000
53553     53553     neimenggu      111.2189       39.8542           81       165     2012      05        20        141              0.000000      24.548523       0.000000       0.186925   -9999.000000   -9999.000000       0.078700       0.309000
53553     53553     neimenggu      111.2189       39.8542           81       165     2012      05        21        142              0.000000      26.794495       4.475266       0.175484       0.115000       0.174500       0.129100       0.507000
53553     53553     neimenggu      111.2189       39.8542           81       165     2012      05        22        143              0.000000      16.540802       0.237182       0.228731       0.070500   -9999.000000       0.082900       0.453000
53553     53553     neimenggu      111.2189       39.8542           81       165     2012      05        23        144              0.000000      18.897522       0.000000       0.217661   -9999.000000       0.181800   -9999.000000   -9999.000000
53553     53553     neimenggu      111.2189       39.8542           81       165     2012      05        24        145              0.000000      18.838348       0.065002       0.203183       0.069000   -9999.000000       0.073900       0.249000
53553     53553     neimenggu      111.2189       39.8542           81       165     2012      05        25        146              0.000000      20.641571       0.535128       0.192881       0.059000       0.085400       0.079700       0.468000
53553     53553     neimenggu      111.2189       39.8542           81       165     2012      05        26        147              0.000000      19.453461       0.024685       0.193214       0.060000       0.080900       0.072400       0.469000
53553     53553     neimenggu      111.2189       39.8542           81       165     2012      05        27        148              0.000000      23.269714       0.000000       0.182321       0.064500   -9999.000000       0.070300       0.259000
53553     53553     neimenggu      111.2189       39.8542           81       165     2012      05        28        149              0.000000      25.813538       7.261291       0.170810       0.089500       0.025700       0.073000       0.307000
53553     53553     neimenggu      111.2189       39.8542           81       165     2012      05        29        150              0.000000      25.023132       0.293057       0.199009       0.078000   -9999.000000       0.086400       0.381000
53553     53553     neimenggu      111.2189       39.8542           81       165     2012      05        30        151              0.000000      19.047546       0.016651       0.234890       0.064000   -9999.000000       0.079100   -9999.000000
53553     53553     neimenggu      111.2189       39.8542           81       165     2012      05        31        152              0.000000      20.563141       4.656895       0.211385       0.123000       0.046100   -9999.000000   -9999.000000
53553     53553     neimenggu      111.2189       39.8542           81       165     2012      06        01        153              0.000000      19.583405       0.059953       0.246179       0.083000   -9999.000000       0.080800   -9999.000000
53553     53553     neimenggu      111.2189       39.8542           81       165     2012      06        02        154              0.000000      21.802185       4.492630       0.225351       0.090000       0.173000       0.089900       0.378000
53553     53553     neimenggu      111.2189       39.8542           81       165     2012      06        03        155              0.000000      19.646545      11.631206       0.247471       0.107000   -9999.000000   -9999.000000       0.830000
53553     53553     neimenggu      111.2189       39.8542           81       165     2012      06        04        156              0.000000      20.850281       0.016214       0.301145       0.069000       0.164700       0.092200       0.610000
53553     53553     neimenggu      111.2189       39.8542           81       165     2012      06        05        157              0.000000      23.619110       0.281170       0.258294       0.075000       0.151200       0.093500       0.544000
53553     53553     neimenggu      111.2189       39.8542           81       165     2012      06        06        158              0.000000      24.872131       3.316072       0.241105       0.110000   -9999.000000       0.111800   -9999.000000
53553     53553     neimenggu      111.2189       39.8542           81       165     2012      06        07        159              0.000000      20.518555       0.000000       0.262383       0.089000   -9999.000000       0.105200       0.495000
53553     53553     neimenggu      111.2189       39.8542           81       165     2012      06        08        160              0.000000      19.706848       0.870895       0.250507       0.069000   -9999.000000       0.090000       0.560000
53553     53553     neimenggu      111.2189       39.8542           81       165     2012      06        09        161              0.000000      23.810791       2.638642       0.239960       0.060000   -9999.000000       0.090200       0.571000
53553     53553     neimenggu      111.2189       39.8542           81       165     2012      06        10        162              0.000000      21.408539       0.000000       0.250003       0.070000       0.130600       0.077300       0.531000
53553     53553     neimenggu      111.2189       39.8542           81       165     2012      06        11        163              0.000000      20.223877       0.000000       0.230383       0.067000   -9999.000000       0.086400   -9999.000000
53553     53553     neimenggu      111.2189       39.8542           81       165     2012      06        12        164              0.000000      22.048645       0.000000       0.215561       0.067000       0.078900       0.083400       0.416000
53553     53553     neimenggu      111.2189       39.8542           81       165     2012      06        13        165              0.000000      24.166687       0.000000       0.202856       0.067500       0.054800       0.085000       0.368000
53553     53553     neimenggu      111.2189       39.8542           81       165     2012      06        14        166              0.000000      21.532288       0.000000       0.197206       0.073000   -9999.000000       0.087200       0.545000
53553     53553     neimenggu      111.2189       39.8542           81       165     2012      06        15        167              0.000000      21.014557       0.015338       0.194438       0.068500       0.038200       0.089800       0.474000
53553     53553     neimenggu      111.2189       39.8542           81       165     2012      06        16        168              0.000000      23.195160       0.000000       0.187482       0.064000   -9999.000000       0.085800   -9999.000000
53553     53553     neimenggu      111.2189       39.8542           81       165     2012      06        17        169              0.000000      25.990082       0.000000       0.177983       0.068500   -9999.000000       0.086700       0.443000
53553     53553     neimenggu      111.2189       39.8542           81       165     2012      06        18        170              0.000000      28.631195       0.060443       0.169564       0.065000   -9999.000000       0.076000       0.350000
53553     53553     neimenggu      111.2189       39.8542           81       165     2012      06        19        171              0.000000      29.553955       0.674691       0.164933       0.078000   -9999.000000       0.086800       0.546000
53553     53553     neimenggu      111.2189       39.8542           81       165     2012      06        20        172              0.000000      26.051483       1.504390       0.171540       0.073000   -9999.000000   -9999.000000       0.762000
53553     53553     neimenggu      111.2189       39.8542           81       165     2012      06        21        173              0.000000      25.858856       1.003013       0.187388       0.080000   -9999.000000       0.087900   -9999.000000
53553     53553     neimenggu      111.2189       39.8542           81       165     2012      06        22        174              0.000000      27.203156       6.184621       0.188770       0.109000       0.138500       0.122500       1.000000
53553     53553     neimenggu      111.2189       39.8542           81       165     2012      06        23        175              0.000000      27.008606      17.359705       0.223259       0.108500       0.233100       0.069800       1.000000
53553     53553     neimenggu      111.2189       39.8542           81       165     2012      06        24        176              0.000000      25.408295       0.865194       0.305811       0.116000       0.280400       0.116400       0.847000
53553     53553     neimenggu      111.2189       39.8542           81       165     2012      06        25        177              0.000000      23.403778       4.168334       0.282267       0.090000   -9999.000000       0.102400       1.000000
53553     53553     neimenggu      111.2189       39.8542           81       165     2012      06        26        178              0.000000      24.900879       4.082661       0.276314       0.118000   -9999.000000       0.154000       1.000000
53553     53553     neimenggu      111.2189       39.8542           81       165     2012      06        27        179              0.000000      23.362122      10.760192       0.287426       0.135000   -9999.000000       0.170800       1.000000
53553     53553     neimenggu      111.2189       39.8542           81       165     2012      06        28        180              0.000000      22.294434       1.697361       0.302848       0.141500       0.205900       0.146500       1.000000
53553     53553     neimenggu      111.2189       39.8542           81       165     2012      06        29        181              0.000000      19.308807       0.000000       0.306673       0.111000       0.392600       0.126700       1.000000
53553     53553     neimenggu      111.2189       39.8542           81       165     2012      06        30        182              0.000000      23.583832       0.000000       0.283854       0.079000       0.104700       0.101200   -9999.000000
53553     53553     neimenggu      111.2189       39.8542           81       165     2012      07        01        183              0.000000      26.151947       0.000000       0.264769       0.079000       0.066100       0.097700       0.545000
53553     53553     neimenggu      111.2189       39.8542           81       165     2012      07        02        184              0.000000      26.974548       0.000000       0.250756       0.078000   -9999.000000       0.097300       0.496000
53553     53553     neimenggu      111.2189       39.8542           81       165     2012      07        03        185              0.000000      26.767334       1.553759       0.235946       0.088500       0.052700       0.104400       0.565000
53553     53553     neimenggu      111.2189       39.8542           81       165     2012      07        04        186              0.000000      25.553253       6.617323       0.241897       0.085500   -9999.000000       0.118100       0.863000
53553     53553     neimenggu      111.2189       39.8542           81       165     2012      07        05        187              0.000000      26.534393       0.281867       0.262697       0.067000   -9999.000000       0.100100   -9999.000000
53553     53553     neimenggu      111.2189       39.8542           81       165     2012      07        06        188              0.000000      26.667511       0.226476       0.258756       0.073000       0.062200       0.097600       0.550000
53553     53553     neimenggu      111.2189       39.8542           81       165     2012      07        07        189              0.000000      28.632568       0.309765       0.239880   -9999.000000   -9999.000000   -9999.000000       0.643000
53553     53553     neimenggu      111.2189       39.8542           81       165     2012      07        08        190              0.000000      25.391815       3.461353       0.240210       0.109000       0.090200       0.107500       0.693000
53553     53553     neimenggu      111.2189       39.8542           81       165     2012      07        09        191              0.000000      24.091736       0.147897       0.257176       0.089500   -9999.000000       0.107600       0.800000
53553     53553     neimenggu      111.2189       39.8542           81       165     2012      07        10        192              0.000000      25.776276       0.297498       0.246561       0.079000   -9999.000000       0.098700   -9999.000000
53553     53553     neimenggu      111.2189       39.8542           81       165     2012      07        11        193              0.000000      27.587006       0.000000       0.231114       0.075000       0.027900       0.087600       0.513000
53553     53553     neimenggu      111.2189       39.8542           81       165     2012      07        12        194              0.000000      27.968506       0.000000       0.213362       0.076000   -9999.000000       0.091700       0.494000
53553     53553     neimenggu      111.2189       39.8542           81       165     2012      07        13        195              0.000000      27.128662       2.099185       0.204361       0.073000   -9999.000000       0.094500       0.579000
53553     53553     neimenggu      111.2189       39.8542           81       165     2012      07        14        196              0.000000      27.567322       0.864073       0.206614       0.091000   -9999.000000       0.104400       0.673000
53553     53553     neimenggu      111.2189       39.8542           81       165     2012      07        15        197              0.000000      25.081909       0.424232       0.224642       0.080000   -9999.000000       0.099100   -9999.000000
53553     53553     neimenggu      111.2189       39.8542           81       165     2012      07        16        198              0.000000      27.145172       0.000000       0.214516       0.080000   -9999.000000       0.096600       0.535000
53553     53553     neimenggu      111.2189       39.8542           81       165     2012      07        17        199              0.000000      28.260925       0.000000       0.198319       0.077500   -9999.000000       0.099500       0.435000
53553     53553     neimenggu      111.2189       39.8542           81       165     2012      07        18        200              0.000000      27.647369       0.000000       0.186959       0.075000       0.060300       0.096300       0.520000
53553     53553     neimenggu      111.2189       39.8542           81       165     2012      07        19        201              0.118000      27.515167       0.131872       0.181821       0.080000       0.029500       0.097800       0.403000
53553     53553     neimenggu      111.2189       39.8542           81       165     2012      07        20        202              0.147188      27.909271      57.484318       0.177545       0.072000   -9999.000000       0.075100   -9999.000000
53553     53553     neimenggu      111.2189       39.8542           81       165     2012      07        21        203              0.276083      29.235291      35.686577       0.238023       0.159000       0.267500       0.150300       1.000000
53553     53553     neimenggu      111.2189       39.8542           81       165     2012      07        22        204              0.240625      20.782074       0.000000       0.369978       0.133000   -9999.000000       0.138600       1.000000
53553     53553     neimenggu      111.2189       39.8542           81       165     2012      07        23        205              0.229583      23.871033       0.062267       0.328143       0.110000   -9999.000000       0.138600       0.860000
53553     53553     neimenggu      111.2189       39.8542           81       165     2012      07        24        206              0.225333      24.320465      17.400427       0.313258   -9999.000000       0.116200   -9999.000000       0.699000
53553     53553     neimenggu      111.2189       39.8542           81       165     2012      07        25        207              0.257542      25.592285       8.079944       0.317076       0.146000   -9999.000000       0.165300       1.000000
53553     53553     neimenggu      111.2189       39.8542           81       165     2012      07        26        208              0.240792      25.121063       0.610715       0.346119       0.121000       0.249400       0.137800       1.000000
53553     53553     neimenggu      111.2189       39.8542           81       165     2012      07        27        209              0.228500      27.018494       3.345125       0.320102       0.129000   -9999.000000       0.148600       0.886000
53553     53553     neimenggu      111.2189       39.8542           81       165     2012      07        28        210              0.229042      24.581268       3.714816       0.317534       0.122000   -9999.000000       0.114600       1.000000
53553     53553     neimenggu      111.2189       39.8542           81       165     2012      07        29        211              0.226250      25.544830       0.409552       0.318944       0.107000       0.197600       0.132800   -9999.000000
53553     53553     neimenggu      111.2189       39.8542           81       165     2012      07        30        212              0.249375      25.851868      19.785528       0.303269       0.133500   -9999.000000       0.173600       1.000000
53553     53553     neimenggu      111.2189       39.8542           81       165     2012      07        31        213              0.257583      21.168427       0.000000       0.342555       0.122500   -9999.000000       0.150600       1.000000
53553     53553     neimenggu      111.2189       39.8542           81       165     2012      08        01        214              0.243042      24.440277       3.605746       0.324854       0.120000   -9999.000000       0.156300       1.000000
53553     53553     neimenggu      111.2189       39.8542           81       165     2012      08        02        215              0.237750      24.462921       2.865855       0.318247       0.118500   -9999.000000       0.132900       0.904000
53553     53553     neimenggu      111.2189       39.8542           81       165     2012      08        03        216              0.231750      25.931793       1.016175       0.313363       0.116000       0.157900       0.137100   -9999.000000
53553     53553     neimenggu      111.2189       39.8542           81       165     2012      08        04        217              0.227750      26.850983       0.132976       0.301373       0.107000   -9999.000000   -9999.000000       0.713000
53553     53553     neimenggu      111.2189       39.8542           81       165     2012      08        05        218              0.223458      27.554199       1.100572       0.290691       0.098000       0.316400       0.120000       0.621000
53553     53553     neimenggu      111.2189       39.8542           81       165     2012      08        06        219              0.223708      27.276703      25.462458       0.285995       0.098000       0.044200       0.114800       0.772000
53553     53553     neimenggu      111.2189       39.8542           81       165     2012      08        07        220              0.238458      24.014282       4.303441       0.347879       0.133000   -9999.000000       0.146800       1.000000
53553     53553     neimenggu      111.2189       39.8542           81       165     2012      08        08        221              0.231083      24.401581       0.000000       0.330620       0.110000       0.099400       0.137000   -9999.000000
53553     53553     neimenggu      111.2189       39.8542           81       165     2012      08        09        222              0.224542      24.838104       0.000000       0.309691       0.099000   -9999.000000       0.127700       0.766000
53553     53553     neimenggu      111.2189       39.8542           81       165     2012      08        10        223              0.218500      25.323975       2.136113       0.295625       0.092500   -9999.000000       0.124000       0.712000
53553     53553     neimenggu      111.2189       39.8542           81       165     2012      08        11        224              0.270083      24.900055      32.249104       0.292002       0.146000   -9999.000000       0.153600       1.000000
53553     53553     neimenggu      111.2189       39.8542           81       165     2012      08        12        225              0.251083      19.422089       0.000000       0.363165       0.124000       0.438100       0.150400       1.000000
53553     53553     neimenggu      111.2189       39.8542           81       165     2012      08        13        226              0.240261      23.559845       2.378036       0.325879       0.109000       0.340400       0.152300   -9999.000000
53553     53553     neimenggu      111.2189       39.8542           81       165     2012      08        14        227              0.237708      23.894623       0.091821       0.316089       0.121000   -9999.000000       0.158700       0.969000
53553     53553     neimenggu      111.2189       39.8542           81       165     2012      08        15        228              0.231083      22.304443       0.000000       0.311669       0.107500   -9999.000000       0.142700       0.746000
53553     53553     neimenggu      111.2189       39.8542           81       165     2012      08        16        229              0.226958      23.346710       0.039176       0.299748       0.104000       0.089200       0.139800       0.745000
53553     53553     neimenggu      111.2189       39.8542           81       165     2012      08        17        230              0.220708      24.584930      11.963462       0.293291       0.118000       0.178200       0.169100       0.948000
53553     53553     neimenggu      111.2189       39.8542           81       165     2012      08        18        231              0.229875      22.602692       0.255827       0.315531       0.132000   -9999.000000       0.170500   -9999.000000
53553     53553     neimenggu      111.2189       39.8542           81       165     2012      08        19        232              0.227458      22.500458       4.720426       0.318630       0.112000   -9999.000000       0.145000       0.806000
53553     53553     neimenggu      111.2189       39.8542           81       165     2012      08        20        233              0.224958      24.301727       0.000000       0.306849       0.110000       0.077800       0.153400       0.790000
53553     53553     neimenggu      111.2189       39.8542           81       165     2012      08        21        234              0.218083      20.841003       0.000000       0.304217       0.105000   -9999.000000   -9999.000000       0.787000
53553     53553     neimenggu      111.2189       39.8542           81       165     2012      08        22        235              0.215750      19.070618       0.000000       0.291286       0.094000   -9999.000000       0.124500   -9999.000000
53553     53553     neimenggu      111.2189       39.8542           81       165     2012      08        23        236              0.213792      20.437958       0.000000       0.283928       0.098000   -9999.000000       0.139200       0.518000
53553     53553     neimenggu      111.2189       39.8542           81       165     2012      08        24        237              0.212250      21.941833       0.000000       0.277646       0.100000       0.114700       0.119800       0.722000
53553     53553     neimenggu      111.2189       39.8542           81       165     2012      08        25        238              0.000000      22.543243       0.000000       0.271572       0.101000   -9999.000000       0.141100       0.756000
53553     53553     neimenggu      111.2189       39.8542           81       165     2012      08        26        239              0.213083      23.758728       3.414882       0.266665       0.106500       0.013700       0.135800       0.806000
53553     53553     neimenggu      111.2189       39.8542           81       165     2012      08        27        240              0.239000      24.384186      23.275009       0.275605       0.115500       0.166300       0.150200   -9999.000000
53553     53553     neimenggu      111.2189       39.8542           81       165     2012      08        28        241              0.237917      23.242096       0.000000       0.362035       0.102000   -9999.000000       0.121000       0.798000
53553     53553     neimenggu      111.2189       39.8542           81       165     2012      08        29        242              0.224375      23.035858       0.000000       0.313921       0.101000       0.025900       0.127000       0.607000
53553     53553     neimenggu      111.2189       39.8542           81       165     2012      08        30        243              0.218167      24.057556       1.097760       0.293584       0.102000   -9999.000000       0.120900       0.825000
53553     53553     neimenggu      111.2189       39.8542           81       165     2012      08        31        244              0.210125      23.914520      10.165780       0.285567       0.111000   -9999.000000       0.142500       0.670000
53553     53553     neimenggu      111.2189       39.8542           81       165     2012      09        01        245              0.278792      21.297211      34.618870       0.304659       0.141000   -9999.000000       0.171500   -9999.000000
53553     53553     neimenggu      111.2189       39.8542           81       165     2012      09        02        246              0.250250      15.281158       1.126761       0.369566       0.151000       0.119300       0.153200       1.000000
53553     53553     neimenggu      111.2189       39.8542           81       165     2012      09        03        247              0.237833      18.002655       0.166584       0.333522       0.134000       0.125600       0.134700       0.923000
53553     53553     neimenggu      111.2189       39.8542           81       165     2012      09        04        248              0.231542      16.193146       0.000000       0.320122       0.121000       0.255000       0.131200       0.877000
53553     53553     neimenggu      111.2189       39.8542           81       165     2012      09        05        249              0.229333      16.923279       0.000000       0.309625       0.111000       0.229700       0.120100       0.758000
53553     53553     neimenggu      111.2189       39.8542           81       165     2012      09        06        250              0.227625      18.745148       1.490112       0.302224       0.108500   -9999.000000       0.125000   -9999.000000
53553     53553     neimenggu      111.2189       39.8542           81       165     2012      09        07        251              0.225250      20.019684       0.000000       0.296073       0.107000   -9999.000000   -9999.000000       0.677000
53553     53553     neimenggu      111.2189       39.8542           81       165     2012      09        08        252              0.224333      19.622589       0.000000       0.291865       0.103000       0.083300       0.111500       0.712000
53553     53553     neimenggu      111.2189       39.8542           81       165     2012      09        09        253              0.223375      20.552063       0.000000       0.286723       0.101000   -9999.000000       0.120900       0.684000
53553     53553     neimenggu      111.2189       39.8542           81       165     2012      09        10        254              0.217667      21.094604       6.390480       0.280683       0.123000   -9999.000000       0.119600       0.959000
53553     53553     neimenggu      111.2189       39.8542           81       165     2012      09        11        255              0.220917      16.365631       0.000000       0.306651       0.113500       0.106100       0.093400   -9999.000000
53553     53553     neimenggu      111.2189       39.8542           81       165     2012      09        12        256              0.212833      15.787109       0.222784       0.295493       0.098000   -9999.000000       0.094100       0.599000
53553     53553     neimenggu      111.2189       39.8542           81       165     2012      09        13        257              0.211417      13.568939       0.132540       0.289245       0.102000   -9999.000000       0.093700       0.560000
53553     53553     neimenggu      111.2189       39.8542           81       165     2012      09        14        258              0.211625      14.187164       0.000000       0.285933       0.093000   -9999.000000       0.086300       0.636000
53553     53553     neimenggu      111.2189       39.8542           81       165     2012      09        15        259              0.212458      15.538116       0.902216       0.281733       0.096000   -9999.000000       0.093700       0.465000
53553     53553     neimenggu      111.2189       39.8542           81       165     2012      09        16        260              0.211875      17.135681       0.095204       0.279497       0.090000       0.052800       0.094500   -9999.000000
53553     53553     neimenggu      111.2189       39.8542           81       165     2012      09        17        261              0.212000      16.698639       0.101331       0.279722       0.100000   -9999.000000       0.095500       0.485000
53553     53553     neimenggu      111.2189       39.8542           81       165     2012      09        18        262              0.212750      17.370880       0.172376       0.276705       0.099000       0.188900       0.094700       0.509000
53553     53553     neimenggu      111.2189       39.8542           81       165     2012      09        19        263              0.210667      18.224670       0.000000       0.272719       0.099000   -9999.000000       0.092100       0.603000
53553     53553     neimenggu      111.2189       39.8542           81       165     2012      09        20        264              0.210435      18.203308       6.156844       0.267974       0.111000   -9999.000000       0.113100       0.451000
53553     53553     neimenggu      111.2189       39.8542           81       165     2012      09        21        265              0.229417      18.459290       0.249331       0.278532   -9999.000000       0.136800       0.107300       1.000000
53553     53553     neimenggu      111.2189       39.8542           81       165     2012      09        22        266              0.222583      16.290314       0.000000       0.293038       0.096500   -9999.000000       0.100400       0.834000
53553     53553     neimenggu      111.2189       39.8542           81       165     2012      09        23        267              0.218250      17.412872       0.000000       0.282928       0.090000       0.142300       0.100800       0.720000
53553     53553     neimenggu      111.2189       39.8542           81       165     2012      09        24        268              0.239792      18.983582      22.042868       0.275250       0.096000   -9999.000000   -9999.000000       1.000000
53553     53553     neimenggu      111.2189       39.8542           81       165     2012      09        25        269              0.260667      17.266296       1.838333       0.316793       0.146000   -9999.000000       0.125700   -9999.000000
53553     53553     neimenggu      111.2189       39.8542           81       165     2012      09        26        270              0.241833      13.908295       0.000000       0.328277       0.123000       0.186100       0.137400       0.965000
53553     53553     neimenggu      111.2189       39.8542           81       165     2012      09        27        271              0.234286      15.782928       0.000000       0.309084   -9999.000000       0.555200       0.116500       0.675000
53553     53553     neimenggu      111.2189       39.8542           81       165     2012      09        28        272              0.221400      11.959473       0.000000       0.299614       0.098000   -9999.000000       0.113300       0.779000
53553     53553     neimenggu      111.2189       39.8542           81       165     2012      09        29        273              0.219917      11.985931       0.000000       0.294192       0.099000   -9999.000000       0.117800       0.686000
53553     53553     neimenggu      111.2189       39.8542           81       165     2012      09        30        274              0.217917      12.641022       0.000000       0.289607       0.093000       0.464700       0.105300   -9999.000000
53553     53553     neimenggu      111.2189       39.8542           81       165     2012      10        01        275              0.216833      13.543488       0.000000       0.285771       0.091000       0.172600       0.090200       0.645000
53553     53553     neimenggu      111.2189       39.8542           81       165     2012      10        02        276              0.215167      14.795166       0.000000       0.281701       0.082000   -9999.000000       0.094600       0.477000
53553     53553     neimenggu      111.2189       39.8542           81       165     2012      10        03        277              0.213042      14.696411       2.722265       0.277501       0.088000       0.032000       0.094100       0.616000
53553     53553     neimenggu      111.2189       39.8542           81       165     2012      10        04        278              0.250250      14.609192       5.746923       0.278696       0.128000   -9999.000000       0.140500       0.979000
53553     53553     neimenggu      111.2189       39.8542           81       165     2012      10        05        279              0.236625      10.224915       0.000000       0.311583       0.130000       0.268500   -9999.000000   -9999.000000
53553     53553     neimenggu      111.2189       39.8542           81       165     2012      10        06        280              0.227000      12.056152       0.000000       0.295705       0.107000       0.112600       0.113200       0.840000
53553     53553     neimenggu      111.2189       39.8542           81       165     2012      10        07        281              0.219750      13.704041       0.000000       0.288774       0.100000   -9999.000000       0.117000       0.706000
53553     53553     neimenggu      111.2189       39.8542           81       165     2012      10        08        282              0.218083      13.364441       2.093235       0.287131   -9999.000000   -9999.000000       0.115100       0.751000
53553     53553     neimenggu      111.2189       39.8542           81       165     2012      10        09        283              0.213625      13.437988       0.000000       0.292002       0.103000       0.230800       0.115000       0.605000
53553     53553     neimenggu      111.2189       39.8542           81       165     2012      10        10        284              0.210500      10.432465       0.000000       0.286223       0.098000   -9999.000000       0.121100   -9999.000000
53553     53553     neimenggu      111.2189       39.8542           81       165     2012      10        11        285              0.210000      11.236786       0.068554       0.282537       0.087000       0.159000   -9999.000000       0.530000
53553     53553     neimenggu      111.2189       39.8542           81       165     2012      10        12        286              0.207833      12.822479       0.059582       0.278475   -9999.000000   -9999.000000       0.105500       0.551000
53553     53553     neimenggu      111.2189       39.8542           81       165     2012      10        13        287              0.204917      12.135529       0.119195       0.274616       0.084000   -9999.000000       0.110300       0.518000
53553     53553     neimenggu      111.2189       39.8542           81       165     2012      10        14        288              0.205542      10.010925       0.049516       0.272408       0.089000       0.152400       0.105400       0.512000
53553     53553     neimenggu      111.2189       39.8542           81       165     2012      10        15        289              0.216292      12.499603       8.240053       0.273371       0.090000   -9999.000000       0.105500   -9999.000000
53553     53553     neimenggu      111.2189       39.8542           81       165     2012      10        16        290              0.224750      11.705353       0.061614       0.296054       0.122000   -9999.000000       0.153100       0.776000
53553     53553     neimenggu      111.2189       39.8542           81       165     2012      10        17        291              0.210958       5.902557       0.063825       0.295185       0.115000   -9999.000000       0.116100       0.627000
53553     53553     neimenggu      111.2189       39.8542           81       165     2012      10        18        292              0.206542       6.974762       0.308154       0.288085   -9999.000000   -9999.000000       0.108000       0.663000
53553     53553     neimenggu      111.2189       39.8542           81       165     2012      10        19        293              0.207083       7.029297       0.062655       0.285123       0.103000       0.179900       0.112900       0.585000
53553     53553     neimenggu      111.2189       39.8542           81       165     2012      10        20        294              0.208417       9.930237       5.516886       0.282574       0.096000   -9999.000000       0.103400       0.598000
53553     53553     neimenggu      111.2189       39.8542           81       165     2012      10        21        295              0.245708      11.813324       7.260850       0.288999   -9999.000000       0.176600       0.156400       1.000000
53553     53553     neimenggu      111.2189       39.8542           81       165     2012      10        22        296              0.230167       5.340424       0.619665       0.323105   -9999.000000   -9999.000000   -9999.000000       0.763000
53553     53553     neimenggu      111.2189       39.8542           81       165     2012      10        23        297              0.222167       7.058350       0.000000       0.305719   -9999.000000   -9999.000000       0.110400       0.785000
53553     53553     neimenggu      111.2189       39.8542           81       165     2012      10        24        298              0.218333       8.304596       0.064339       0.298378   -9999.000000       0.205100       0.107300   -9999.000000
53553     53553     neimenggu      111.2189       39.8542           81       165     2012      10        25        299              0.000000       8.987122       0.064335       0.293573       0.104000   -9999.000000       0.099300       0.677000
53553     53553     neimenggu      111.2189       39.8542           81       165     2012      10        26        300              0.214167       9.773926       0.439925       0.290341       0.108000   -9999.000000       0.111100       0.901000
53553     53553     neimenggu      111.2189       39.8542           81       165     2012      10        27        301              0.215708       7.619324       0.000000       0.292110       0.105000       0.117900       0.125400       0.860000
53553     53553     neimenggu      111.2189       39.8542           81       165     2012      10        28        302              0.000000       7.591370       0.066274       0.290373   -9999.000000   -9999.000000       0.109700       0.787000
53553     53553     neimenggu      111.2189       39.8542           81       165     2012      10        29        303              0.209250       9.162598       0.000000       0.287982   -9999.000000       0.274700       0.075700   -9999.000000
53553     53553     neimenggu      111.2189       39.8542           81       165     2012      10        30        304              0.204500       5.542267       0.181111       0.273491       0.103000   -9999.000000       0.088400       0.459000
53553     53553     neimenggu      111.2189       39.8542           81       165     2012      10        31        305              0.204375       4.349457       0.000000       0.273861       0.095000       0.091000       0.091600       0.439000
53553     53553     neimenggu      111.2189       39.8542           81       165     2012      11        01        306              0.205083       5.497864       0.000000       0.278283       0.095000       0.162800       0.101000       0.538000
53553     53553     neimenggu      111.2189       39.8542           81       165     2012      11        02        307              0.206958       6.481323       0.493390       0.281161       0.089000   -9999.000000       0.095400       0.447000
53553     53553     neimenggu      111.2189       39.8542           81       165     2012      11        03        308              0.205500       7.913696       0.267981       0.277285   -9999.000000   -9999.000000       0.068500   -9999.000000
53553     53553     neimenggu      111.2189       39.8542           81       165     2012      11        04        309              0.184625      -1.493652       0.000000       0.192582   -9999.000000   -9999.000000       0.061300       0.466000
53553     53553     neimenggu      111.2189       39.8542           81       165     2012      11        05        310              0.174208      -2.847260       0.000000       0.143168   -9999.000000       0.087000       0.052900       0.315000
53553     53553     neimenggu      111.2189       39.8542           81       165     2012      11        06        311              0.182750      -1.227417       0.000000       0.168071       0.118000       0.029100       0.073500       0.610000
53553     53553     neimenggu      111.2189       39.8542           81       165     2012      11        07        312              0.195208       0.606781       0.081262       0.201232       0.120000   -9999.000000       0.080300       0.535000
53553     53553     neimenggu      111.2189       39.8542           81       165     2012      11        08        313              0.197750       1.220612       0.000000       0.218059   -9999.000000       0.081100   -9999.000000   -9999.000000
53553     53553     neimenggu      111.2189       39.8542           81       165     2012      11        09        314              0.205667       2.803375       0.376592       0.256161   -9999.000000   -9999.000000       0.059600       0.614000
53553     53553     neimenggu      111.2189       39.8542           81       165     2012      11        10        315              0.216000       1.955109       0.534977       0.259842   -9999.000000       0.163700       0.043400       0.592000
53553     53553     neimenggu      111.2189       39.8542           81       165     2012      11        11        316              0.207458      -2.155975       0.097247       0.174191   -9999.000000       0.116200       0.049700       0.426000
53553     53553     neimenggu      111.2189       39.8542           81       165     2012      11        12        317              0.197125      -3.438019       0.101503       0.135833   -9999.000000       0.116000       0.044400       0.582000
53553     53553     neimenggu      111.2189       39.8542           81       165     2012      11        13        318              0.000000      -2.976837       0.000000       0.144950   -9999.000000   -9999.000000       0.045700   -9999.000000
53553     53553     neimenggu      111.2189       39.8542           81       165     2012      11        14        319              0.171750      -3.249207       0.000000       0.140141   -9999.000000       0.031100       0.043500       0.554000
53553     53553     neimenggu      111.2189       39.8542           81       165     2012      11        15        320              0.172625      -1.283295       0.000000       0.168091   -9999.000000   -9999.000000       0.040500       0.515000
53553     53553     neimenggu      111.2189       39.8542           81       165     2012      11        16        321              0.185250      -1.362213       0.000000       0.165686   -9999.000000       0.044900       0.039700       0.574000
53553     53553     neimenggu      111.2189       39.8542           81       165     2012      11        17        322              0.000000      -2.479004       0.000000       0.145339   -9999.000000       0.170100       0.052900       0.522000
53553     53553     neimenggu      111.2189       39.8542           81       165     2012      11        18        323              0.174292      -0.667603       0.000000       0.173431   -9999.000000       0.152200       0.050900       0.612000
53553     53553     neimenggu      111.2189       39.8542           81       165     2012      11        19        324              0.150125      -1.223633       0.000000       0.179421   -9999.000000       0.048300       0.046100       0.396000
53553     53553     neimenggu      111.2189       39.8542           81       165     2012      11        20        325              0.153125      -1.403473       0.000000       0.166481   -9999.000000   -9999.000000       0.039700       0.437000
53553     53553     neimenggu      111.2189       39.8542           81       165     2012      11        21        326              0.167708       0.193359       0.000000       0.190568       0.102000       0.023700       0.035600       0.620000
53553     53553     neimenggu      111.2189       39.8542           81       165     2012      11        22        327              0.153333       0.832184       0.000000       0.209609   -9999.000000   -9999.000000       0.037400   -9999.000000
53553     53553     neimenggu      111.2189       39.8542           81       165     2012      11        23        328              0.117870      -2.026550       0.000000       0.163048   -9999.000000       0.110600       0.039800       0.528000
53553     53553     neimenggu      111.2189       39.8542           81       165     2012      11        24        329              0.115500      -3.034058       0.000000       0.140800   -9999.000000       0.032600       0.045000       0.336000
53553     53553     neimenggu      111.2189       39.8542           81       165     2012      11        25        330              0.110625      -1.110626       0.000000       0.164065   -9999.000000       0.098800   -9999.000000       0.459000
53553     53553     neimenggu      111.2189       39.8542           81       165     2012      11        26        331              0.107292      -3.352051       0.000000       0.141845   -9999.000000   -9999.000000   -9999.000000       0.415000
53553     53553     neimenggu      111.2189       39.8542           81       165     2012      11        27        332              0.106083      -2.163879       0.000000       0.148622   -9999.000000       0.017300       0.036300   -9999.000000
53553     53553     neimenggu      111.2189       39.8542           81       165     2012      11        28        333              0.100542      -2.948059       0.000000       0.151689   -9999.000000       0.174300       0.040700       0.258000
53553     53553     neimenggu      111.2189       39.8542           81       165     2012      11        29        334              0.097583      -5.609619       0.000000       0.124211   -9999.000000   -9999.000000       0.038200       0.316000
53553     53553     neimenggu      111.2189       39.8542           81       165     2012      11        30        335              0.099375      -4.897430       0.000000       0.129384   -9999.000000   -9999.000000       0.040400       0.368000
53553     53553     neimenggu      111.2189       39.8542           81       165     2012      12        01        336              0.102125      -3.663116       0.000000       0.133002   -9999.000000   -9999.000000       0.035700       0.131000
53553     53553     neimenggu      111.2189       39.8542           81       165     2012      12        02        337              0.101250      -2.238892       0.000000       0.150727   -9999.000000   -9999.000000       0.032600   -9999.000000
53553     53553     neimenggu      111.2189       39.8542           81       165     2012      12        03        338              0.095083      -3.585022       0.000000       0.139500   -9999.000000       0.156400       0.035900       0.203000
53553     53553     neimenggu      111.2189       39.8542           81       165     2012      12        04        339              0.095000      -5.442535       0.000000       0.121850   -9999.000000   -9999.000000       0.040800       0.184000
53553     53553     neimenggu      111.2189       39.8542           81       165     2012      12        05        340              0.090750      -5.330170       0.000000       0.126672   -9999.000000   -9999.000000       0.042900       0.244000
53553     53553     neimenggu      111.2189       39.8542           81       165     2012      12        06        341              0.091917      -7.470947       0.000000       0.114388   -9999.000000   -9999.000000   -9999.000000       0.298000
53553     53553     neimenggu      111.2189       39.8542           81       165     2012      12        07        342              0.089292      -6.650909       0.000000       0.115417   -9999.000000   -9999.000000       0.032500   -9999.000000
53553     53553     neimenggu      111.2189       39.8542           81       165     2012      12        08        343              0.085458      -9.353333       0.000000       0.112091   -9999.000000   -9999.000000       0.037200       0.211000
53553     53553     neimenggu      111.2189       39.8542           81       165     2012      12        09        344              0.087542     -10.452637       0.000000       0.108434   -9999.000000   -9999.000000       0.032900       0.318000
53553     53553     neimenggu      111.2189       39.8542           81       165     2012      12        10        345              0.088583      -7.674652       0.000000       0.109437   -9999.000000   -9999.000000       0.037800       0.289000
53553     53553     neimenggu      111.2189       39.8542           81       165     2012      12        11        346              0.090208      -6.826202       0.000000       0.115811   -9999.000000   -9999.000000       0.042100       0.301000
53553     53553     neimenggu      111.2189       39.8542           81       165     2012      12        12        347              0.091917      -4.966980       0.000000       0.121351   -9999.000000   -9999.000000       0.037700   -9999.000000
53553     53553     neimenggu      111.2189       39.8542           81       165     2012      12        13        348              0.095333      -3.599457       0.000000       0.138450   -9999.000000   -9999.000000       0.032300       0.248000
53553     53553     neimenggu      111.2189       39.8542           81       165     2012      12        14        349              0.101833      -3.139008       0.000000       0.130656   -9999.000000   -9999.000000       0.032500       0.263000
53553     53553     neimenggu      111.2189       39.8542           81       165     2012      12        15        350              0.000000      -2.218079       0.000000       0.141728   -9999.000000   -9999.000000       0.039700       0.225000
53553     53553     neimenggu      111.2189       39.8542           81       165     2012      12        16        351              0.101958      -1.580200       0.000000       0.158240   -9999.000000       0.115400       0.036900       0.288000
53553     53553     neimenggu      111.2189       39.8542           81       165     2012      12        17        352              0.092167      -3.317566       0.000000       0.145990   -9999.000000       0.083900       0.034900       0.261000
53553     53553     neimenggu      111.2189       39.8542           81       165     2012      12        18        353              0.090417      -7.931488       0.000000       0.113799   -9999.000000   -9999.000000       0.033000       0.115000
53553     53553     neimenggu      111.2189       39.8542           81       165     2012      12        19        354              0.091375      -7.281097       0.000000       0.111464   -9999.000000   -9999.000000       0.034500       0.200000
53553     53553     neimenggu      111.2189       39.8542           81       165     2012      12        20        355              0.000000      -5.337982       0.000000       0.122477   -9999.000000   -9999.000000       0.028700       0.223000
53553     53553     neimenggu      111.2189       39.8542           81       165     2012      12        21        356              0.092667      -6.467255       0.000000       0.115722   -9999.000000   -9999.000000       0.032200   -9999.000000
53553     53553     neimenggu      111.2189       39.8542           81       165     2012      12        22        357              0.088250      -9.269257       0.000000       0.111756   -9999.000000   -9999.000000       0.029800       0.297000
53553     53553     neimenggu      111.2189       39.8542           81       165     2012      12        23        358              0.084333     -14.408997       0.000000       0.107228   -9999.000000   -9999.000000   -9999.000000       0.178000
53553     53553     neimenggu      111.2189       39.8542           81       165     2012      12        24        359              0.083800     -15.038239       0.000000       0.104448   -9999.000000   -9999.000000       0.030400       0.268000
53553     53553     neimenggu      111.2189       39.8542           81       165     2012      12        25        360              0.084042     -13.734711       0.000000       0.104748   -9999.000000   -9999.000000       0.029900       0.136000
53553     53553     neimenggu      111.2189       39.8542           81       165     2012      12        26        361              0.000000     -12.302063       0.000000       0.105245   -9999.000000   -9999.000000       0.030300   -9999.000000
53553     53553     neimenggu      111.2189       39.8542           81       165     2012      12        27        362              0.087091      -9.290802       0.000000       0.106446   -9999.000000   -9999.000000       0.036800       0.209000
53553     53553     neimenggu      111.2189       39.8542           81       165     2012      12        28        363              0.000000      -6.846802       0.000000       0.109691   -9999.000000   -9999.000000       0.036600       0.083000
53553     53553     neimenggu      111.2189       39.8542           81       165     2012      12        29        364              0.000000      -9.327698       0.000000       0.106946   -9999.000000   -9999.000000       0.033200       0.292000
53553     53553     neimenggu      111.2189       39.8542           81       165     2012      12        30        365              0.000000     -12.274963       0.000000       0.105590   -9999.000000   -9999.000000       0.030400       0.315000
53553     53553     neimenggu      111.2189       39.8542           81       165     2012      12        31        366              0.085400     -10.155670       0.000000       0.105838   -9999.000000   -9999.000000       0.036400   -9999.000000
