# Supplementary material for: Research on Fusing Multisatellite Soil Moisture Data Based on Bayesian Model Averaging
Source: Hindawi journal article supplement (doi:10.1155/2018/9310838), 2018-06-25
Supplement: f1 [file 9310838.f1.zip › 2012_sm00-10cm_daily_ZDB_ZHY_53565_366days_allin.txt]

53565     53565     shanxi         111.4600       39.4283           82       166     2012      01        01        001              0.000000   -9999.000000       0.000000   -9999.000000   -9999.000000   -9999.000000       0.043500   -9999.000000
53565     53565     shanxi         111.4600       39.4283           82       166     2012      01        02        002              0.015625      -6.277283       0.000000       0.121494   -9999.000000   -9999.000000       0.050500       0.020000
53565     53565     shanxi         111.4600       39.4283           82       166     2012      01        03        003              0.000000      -8.733490       0.000000       0.116473   -9999.000000   -9999.000000       0.054600       0.025000
53565     53565     shanxi         111.4600       39.4283           82       166     2012      01        04        004              0.012792     -10.947266       0.000000       0.113797   -9999.000000   -9999.000000       0.044700       0.008000
53565     53565     shanxi         111.4600       39.4283           82       166     2012      01        05        005              0.013250     -10.842804      14.977095       0.113290   -9999.000000   -9999.000000       0.053800       0.044000
53565     53565     shanxi         111.4600       39.4283           82       166     2012      01        06        006              0.013917      -9.548187       0.000000       0.114110   -9999.000000   -9999.000000       0.046600       0.014000
53565     53565     shanxi         111.4600       39.4283           82       166     2012      01        07        007              0.015417      -7.910858       0.000000       0.116753   -9999.000000   -9999.000000       0.053500       0.075000
53565     53565     shanxi         111.4600       39.4283           82       166     2012      01        08        008              0.000000      -7.083435       0.000000       0.122483   -9999.000000   -9999.000000       0.049000       0.027000
53565     53565     shanxi         111.4600       39.4283           82       166     2012      01        09        009              0.014125      -7.924408       0.000000       0.119602   -9999.000000   -9999.000000   -9999.000000       0.111000
53565     53565     shanxi         111.4600       39.4283           82       166     2012      01        10        010              0.013792      -7.829651       0.000000       0.119370   -9999.000000   -9999.000000       0.047100       0.101000
53565     53565     shanxi         111.4600       39.4283           82       166     2012      01        11        011              0.013435      -8.383728       0.000000       0.117733   -9999.000000   -9999.000000       0.055200       0.038000
53565     53565     shanxi         111.4600       39.4283           82       166     2012      01        12        012              0.013917      -8.566101       0.174578       0.115802   -9999.000000   -9999.000000       0.046000       0.054000
53565     53565     shanxi         111.4600       39.4283           82       166     2012      01        13        013              0.014042      -7.877014       0.620263       0.119800   -9999.000000   -9999.000000       0.050000   -9999.000000
53565     53565     shanxi         111.4600       39.4283           82       166     2012      01        14        014              0.015208      -7.699768       0.000000       0.121812   -9999.000000   -9999.000000   -9999.000000       0.205000
53565     53565     shanxi         111.4600       39.4283           82       166     2012      01        15        015              0.015708      -6.467407       0.000000       0.126821   -9999.000000   -9999.000000       0.047300       0.159000
53565     53565     shanxi         111.4600       39.4283           82       166     2012      01        16        016              0.015667      -6.056366       0.000000       0.132113   -9999.000000   -9999.000000       0.053700       0.100000
53565     53565     shanxi         111.4600       39.4283           82       166     2012      01        17        017              0.000000      -5.720337       0.000000       0.133983   -9999.000000   -9999.000000       0.044300       0.052000
53565     53565     shanxi         111.4600       39.4283           82       166     2012      01        18        018              0.016083      -5.991180       0.000000       0.134868   -9999.000000   -9999.000000       0.046300   -9999.000000
53565     53565     shanxi         111.4600       39.4283           82       166     2012      01        19        019              0.017083      -4.540863       0.000000       0.139661   -9999.000000       0.088700       0.052400       0.045000
53565     53565     shanxi         111.4600       39.4283           82       166     2012      01        20        020              0.016917      -4.394379       0.000000       0.140559   -9999.000000   -9999.000000       0.046100       0.067000
53565     53565     shanxi         111.4600       39.4283           82       166     2012      01        21        021              0.015042      -9.091064       0.000000       0.119645   -9999.000000   -9999.000000       0.042400   -9999.000000
53565     53565     shanxi         111.4600       39.4283           82       166     2012      01        22        022              0.012458     -11.961243       0.000000       0.114185   -9999.000000   -9999.000000       0.048000       0.007000
53565     53565     shanxi         111.4600       39.4283           82       166     2012      01        23        023              0.012042     -12.956665       0.000000       0.111535   -9999.000000   -9999.000000       0.041600   -9999.000000
53565     53565     shanxi         111.4600       39.4283           82       166     2012      01        24        024              0.012000     -12.347015       0.000000       0.111500   -9999.000000   -9999.000000   -9999.000000       0.027000
53565     53565     shanxi         111.4600       39.4283           82       166     2012      01        25        025              0.012292     -10.956299       0.000000       0.112043   -9999.000000   -9999.000000       0.051000       0.174000
53565     53565     shanxi         111.4600       39.4283           82       166     2012      01        26        026              0.012917      -9.205963       0.000000       0.112985   -9999.000000   -9999.000000       0.047800       0.012000
53565     53565     shanxi         111.4600       39.4283           82       166     2012      01        27        027              0.013667      -7.644135       0.000000       0.121111   -9999.000000   -9999.000000       0.048400       0.095000
53565     53565     shanxi         111.4600       39.4283           82       166     2012      01        28        028              0.014000      -6.071747       0.000000       0.132566   -9999.000000   -9999.000000       0.051800   -9999.000000
53565     53565     shanxi         111.4600       39.4283           82       166     2012      01        29        029              0.013750      -7.070892       0.000000       0.128238   -9999.000000   -9999.000000       0.044500       0.081000
53565     53565     shanxi         111.4600       39.4283           82       166     2012      01        30        030              0.014625      -6.955353       0.000000       0.129615   -9999.000000   -9999.000000       0.050400       0.034000
53565     53565     shanxi         111.4600       39.4283           82       166     2012      01        31        031              0.014708      -5.126617       0.000000       0.136779   -9999.000000   -9999.000000   -9999.000000       0.119000
53565     53565     shanxi         111.4600       39.4283           82       166     2012      02        01        032              0.012958      -6.326111       0.000000       0.138565   -9999.000000   -9999.000000       0.045900       0.042000
53565     53565     shanxi         111.4600       39.4283           82       166     2012      02        02        033              0.012625     -10.309357       0.000000       0.114681   -9999.000000   -9999.000000       0.055400       0.036000
53565     53565     shanxi         111.4600       39.4283           82       166     2012      02        03        034              0.013250      -9.680145       0.000000       0.113962   -9999.000000   -9999.000000       0.044900       0.083000
53565     53565     shanxi         111.4600       39.4283           82       166     2012      02        04        035              0.014958      -7.766632       0.000000       0.127073   -9999.000000   -9999.000000       0.047300       0.026000
53565     53565     shanxi         111.4600       39.4283           82       166     2012      02        05        036              0.016000      -5.638672       0.000000       0.133231   -9999.000000   -9999.000000       0.051600       0.259000
53565     53565     shanxi         111.4600       39.4283           82       166     2012      02        06        037              0.013875      -4.337982       0.000000       0.147157   -9999.000000   -9999.000000       0.056300       0.031000
53565     53565     shanxi         111.4600       39.4283           82       166     2012      02        07        038              0.012708      -9.496918       0.000000       0.118047   -9999.000000   -9999.000000       0.048300       0.012000
53565     53565     shanxi         111.4600       39.4283           82       166     2012      02        08        039              0.012875      -9.627747       0.000000       0.115268   -9999.000000   -9999.000000       0.057100       0.098000
53565     53565     shanxi         111.4600       39.4283           82       166     2012      02        09        040              0.013000      -8.799896       0.000000       0.118352   -9999.000000   -9999.000000       0.046400       0.044000
53565     53565     shanxi         111.4600       39.4283           82       166     2012      02        10        041              0.013583      -8.669830       1.078981       0.119092   -9999.000000   -9999.000000       0.055000       0.067000
53565     53565     shanxi         111.4600       39.4283           82       166     2012      02        11        042              0.015458      -7.049652       0.000000       0.129075   -9999.000000   -9999.000000       0.053200   -9999.000000
53565     53565     shanxi         111.4600       39.4283           82       166     2012      02        12        043              0.016250      -4.528107       0.000000       0.147655   -9999.000000   -9999.000000   -9999.000000       0.062000
53565     53565     shanxi         111.4600       39.4283           82       166     2012      02        13        044              0.018083      -3.975372       0.000000       0.142828       0.069000   -9999.000000   -9999.000000       0.009000
53565     53565     shanxi         111.4600       39.4283           82       166     2012      02        14        045              0.019083      -2.049377       0.000000       0.167183       0.072000   -9999.000000       0.056700       0.078000
53565     53565     shanxi         111.4600       39.4283           82       166     2012      02        15        046              0.017042      -2.706879       0.000000       0.166756   -9999.000000   -9999.000000       0.046700       0.073000
53565     53565     shanxi         111.4600       39.4283           82       166     2012      02        16        047              0.014958      -4.582092       0.000000       0.153831   -9999.000000   -9999.000000       0.055600   -9999.000000
53565     53565     shanxi         111.4600       39.4283           82       166     2012      02        17        048              0.014333      -6.579865       0.000000       0.136427   -9999.000000   -9999.000000   -9999.000000       0.192000
53565     53565     shanxi         111.4600       39.4283           82       166     2012      02        18        049              0.014333      -7.243622       0.054255       0.131106       0.069000   -9999.000000       0.049700       0.040000
53565     53565     shanxi         111.4600       39.4283           82       166     2012      02        19        050              0.016000      -6.789093       0.108947       0.133351       0.074000   -9999.000000       0.062300       0.165000
53565     53565     shanxi         111.4600       39.4283           82       166     2012      02        20        051              0.019708      -3.836670       0.000000       0.153353       0.075000   -9999.000000       0.048400       0.094000
53565     53565     shanxi         111.4600       39.4283           82       166     2012      02        21        052              0.026917      -0.529785       0.000000       0.178116   -9999.000000       0.018000   -9999.000000   -9999.000000
53565     53565     shanxi         111.4600       39.4283           82       166     2012      02        22        053              0.029417       2.172485       0.000000       0.201940   -9999.000000   -9999.000000       0.055400       0.137000
53565     53565     shanxi         111.4600       39.4283           82       166     2012      02        23        054              0.031000       1.134277       0.000000       0.192056       0.068000       0.023700       0.058800       0.119000
53565     53565     shanxi         111.4600       39.4283           82       166     2012      02        24        055              0.027917       2.245850       0.786035       0.204787   -9999.000000   -9999.000000       0.049700       0.246000
53565     53565     shanxi         111.4600       39.4283           82       166     2012      02        25        056              0.022500      -0.924316       0.000000       0.186087   -9999.000000   -9999.000000       0.055000       0.080000
53565     53565     shanxi         111.4600       39.4283           82       166     2012      02        26        057              0.021125      -3.164093       0.000000       0.154619   -9999.000000   -9999.000000       0.050500   -9999.000000
53565     53565     shanxi         111.4600       39.4283           82       166     2012      02        27        058              0.024167      -1.736145       0.000000       0.171358   -9999.000000   -9999.000000   -9999.000000       0.279000
53565     53565     shanxi         111.4600       39.4283           82       166     2012      02        28        059              0.030125       0.144653       0.000000       0.183353       0.072000       0.082000   -9999.000000       0.119000
53565     53565     shanxi         111.4600       39.4283           82       166     2012      02        29        060              0.000000   -9999.000000       0.000000   -9999.000000       0.073000   -9999.000000   -9999.000000   -9999.000000
53565     53565     shanxi         111.4600       39.4283           82       166     2012      03        01        061              0.039125       2.261078      17.285572       0.205199       0.074000   -9999.000000       0.055800       0.140000
53565     53565     shanxi         111.4600       39.4283           82       166     2012      03        02        062              0.045208       2.206543       0.000000       0.204281   -9999.000000       0.029600       0.047500       0.110000
53565     53565     shanxi         111.4600       39.4283           82       166     2012      03        03        063              0.050000       2.743958       0.090140       0.217619   -9999.000000   -9999.000000       0.050100       0.123000
53565     53565     shanxi         111.4600       39.4283           82       166     2012      03        04        064              0.046417       1.916901       0.000000       0.210117       0.077000       0.111300       0.057900       0.187000
53565     53565     shanxi         111.4600       39.4283           82       166     2012      03        05        065              0.038667       1.898865       2.363554       0.210078       0.084000   -9999.000000   -9999.000000       0.197000
53565     53565     shanxi         111.4600       39.4283           82       166     2012      03        06        066              0.029167      -1.918701       0.000000       0.181847       0.085000   -9999.000000       0.051600       0.162000
53565     53565     shanxi         111.4600       39.4283           82       166     2012      03        07        067              0.000000      -0.351074       0.000000       0.184867       0.082000       0.058100       0.060700       0.242000
53565     53565     shanxi         111.4600       39.4283           82       166     2012      03        08        068              0.031208       0.007935       0.309355       0.185290   -9999.000000   -9999.000000       0.055900       0.056000
53565     53565     shanxi         111.4600       39.4283           82       166     2012      03        09        069              0.032875       0.127869       0.000000       0.185636       0.071000       0.110900       0.060400       0.262000
53565     53565     shanxi         111.4600       39.4283           82       166     2012      03        10        070              0.032125       1.799225       0.000000       0.200445       0.066000       0.034800       0.057800       0.189000
53565     53565     shanxi         111.4600       39.4283           82       166     2012      03        11        071              0.031333      -0.452026       0.000000       0.182054       0.074000   -9999.000000       0.055200   -9999.000000
53565     53565     shanxi         111.4600       39.4283           82       166     2012      03        12        072              0.036833      -0.048462       0.000000       0.180205       0.069000       0.035000       0.051900       0.166000
53565     53565     shanxi         111.4600       39.4283           82       166     2012      03        13        073              0.044792       1.599762       0.000000       0.190634   -9999.000000   -9999.000000       0.057700       0.054000
53565     53565     shanxi         111.4600       39.4283           82       166     2012      03        14        074              0.074667       3.019531       0.566776       0.199518   -9999.000000   -9999.000000   -9999.000000       0.204000
53565     53565     shanxi         111.4600       39.4283           82       166     2012      03        15        075              0.086333       5.179321       3.898003       0.214653   -9999.000000   -9999.000000       0.083000       0.691000
53565     53565     shanxi         111.4600       39.4283           82       166     2012      03        16        076              0.117875       2.985138       0.000000       0.245341       0.085000   -9999.000000   -9999.000000   -9999.000000
53565     53565     shanxi         111.4600       39.4283           82       166     2012      03        17        077              0.111583       6.466125       0.025246       0.252118       0.074000       0.075000       0.057900       0.462000
53565     53565     shanxi         111.4600       39.4283           82       166     2012      03        18        078              0.103667       6.234772       0.000000       0.237997   -9999.000000   -9999.000000       0.065500       0.268000
53565     53565     shanxi         111.4600       39.4283           82       166     2012      03        19        079              0.106208       4.201691       0.426280       0.229976   -9999.000000   -9999.000000       0.061800       0.508000
53565     53565     shanxi         111.4600       39.4283           82       166     2012      03        20        080              0.106167       5.527710       0.100293       0.236370       0.072000       0.025200       0.060100       0.206000
53565     53565     shanxi         111.4600       39.4283           82       166     2012      03        21        081              0.104167       6.960510       0.287796       0.239012       0.083000   -9999.000000       0.079800   -9999.000000
53565     53565     shanxi         111.4600       39.4283           82       166     2012      03        22        082              0.109167       3.473938       0.358039       0.237115       0.106000   -9999.000000       0.069400       0.726000
53565     53565     shanxi         111.4600       39.4283           82       166     2012      03        23        083              0.102417       4.494873       0.634287       0.239328       0.087000   -9999.000000       0.056000       0.208000
53565     53565     shanxi         111.4600       39.4283           82       166     2012      03        24        084              0.097792       4.142761       0.000000       0.228137   -9999.000000   -9999.000000   -9999.000000       0.333000
53565     53565     shanxi         111.4600       39.4283           82       166     2012      03        25        085              0.000000       6.877167       0.021216       0.231788       0.069000       0.179300       0.060400       0.208000
53565     53565     shanxi         111.4600       39.4283           82       166     2012      03        26        086              0.097708       8.333588       0.190255       0.231854       0.061000   -9999.000000       0.060000   -9999.000000
53565     53565     shanxi         111.4600       39.4283           82       166     2012      03        27        087              0.097333       9.570557       0.308281       0.230709       0.069000       0.039500       0.065600       0.355000
53565     53565     shanxi         111.4600       39.4283           82       166     2012      03        28        088              0.098583      10.057037       1.233135       0.225667       0.087500       0.029600       0.089700       0.717000
53565     53565     shanxi         111.4600       39.4283           82       166     2012      03        29        089              0.101292      11.588440       0.000000       0.237243   -9999.000000       0.124900       0.058100       0.653000
53565     53565     shanxi         111.4600       39.4283           82       166     2012      03        30        090              0.095500       9.612457       0.000000       0.228044       0.071000       0.014400       0.065300       0.312000
53565     53565     shanxi         111.4600       39.4283           82       166     2012      03        31        091              0.094750       5.910919       0.515892       0.221432       0.067000   -9999.000000       0.059100       0.251000
53565     53565     shanxi         111.4600       39.4283           82       166     2012      04        01        092              0.093583       9.158264       0.000000       0.223682       0.069000   -9999.000000       0.066700       0.215000
53565     53565     shanxi         111.4600       39.4283           82       166     2012      04        02        093              0.088000      10.849213       0.183461       0.220550       0.070000       0.091700   -9999.000000       0.142000
53565     53565     shanxi         111.4600       39.4283           82       166     2012      04        03        094              0.086542       6.207306       0.000000       0.205611   -9999.000000   -9999.000000       0.058400       0.214000
53565     53565     shanxi         111.4600       39.4283           82       166     2012      04        04        095              0.087708       8.756012       0.000000       0.214381   -9999.000000       0.029700       0.066900       0.156000
53565     53565     shanxi         111.4600       39.4283           82       166     2012      04        05        096              0.086042      10.563110       0.000000       0.208880       0.062000   -9999.000000       0.053800       0.138000
53565     53565     shanxi         111.4600       39.4283           82       166     2012      04        06        097              0.085500      11.016357       0.000000       0.204647       0.069000   -9999.000000       0.056200       0.076000
53565     53565     shanxi         111.4600       39.4283           82       166     2012      04        07        098              0.084875      12.635468       0.000000       0.198864       0.061000   -9999.000000       0.063100       0.210000
53565     53565     shanxi         111.4600       39.4283           82       166     2012      04        08        099              0.084167      13.738037       0.000000       0.193236       0.061000   -9999.000000       0.071800       0.173000
53565     53565     shanxi         111.4600       39.4283           82       166     2012      04        09        100              0.082792      15.113800       0.300047       0.186962       0.063000       0.086300       0.058900   -9999.000000
53565     53565     shanxi         111.4600       39.4283           82       166     2012      04        10        101              0.080042      16.047302       0.135881       0.184564       0.058500   -9999.000000       0.066100       0.107000
53565     53565     shanxi         111.4600       39.4283           82       166     2012      04        11        102              0.076417      14.360840       1.369145       0.182649   -9999.000000   -9999.000000       0.080700       0.599000
53565     53565     shanxi         111.4600       39.4283           82       166     2012      04        12        103              0.082750       6.309845       0.556981       0.202099       0.071000       0.020700       0.065000       0.454000
53565     53565     shanxi         111.4600       39.4283           82       166     2012      04        13        104              0.084833      12.265045       0.000000       0.209715       0.064000   -9999.000000       0.059700       0.133000
53565     53565     shanxi         111.4600       39.4283           82       166     2012      04        14        105              0.083792      14.615936       0.000000       0.196387   -9999.000000   -9999.000000       0.058800   -9999.000000
53565     53565     shanxi         111.4600       39.4283           82       166     2012      04        15        106              0.081875      15.725586       0.000000       0.186198       0.058000       0.047900       0.055400       0.103000
53565     53565     shanxi         111.4600       39.4283           82       166     2012      04        16        107              0.080542      15.312866       0.000000       0.178889       0.056000   -9999.000000       0.066100       0.055000
53565     53565     shanxi         111.4600       39.4283           82       166     2012      04        17        108              0.079458      15.755981       0.000000       0.173410       0.058000   -9999.000000       0.055700       0.217000
53565     53565     shanxi         111.4600       39.4283           82       166     2012      04        18        109              0.078042      18.443817       1.514003       0.169800       0.063000   -9999.000000   -9999.000000       0.652000
53565     53565     shanxi         111.4600       39.4283           82       166     2012      04        19        110              0.079958      15.626007       0.000000       0.187741       0.065000       0.021800   -9999.000000   -9999.000000
53565     53565     shanxi         111.4600       39.4283           82       166     2012      04        20        111              0.079750      15.937897       0.459708       0.185656       0.077000   -9999.000000       0.082200       0.119000
53565     53565     shanxi         111.4600       39.4283           82       166     2012      04        21        112              0.079917      16.975372       0.000000       0.181093       0.057000   -9999.000000       0.070000       0.110000
53565     53565     shanxi         111.4600       39.4283           82       166     2012      04        22        113              0.079167      18.202301       0.000000       0.175671       0.061000       0.088100   -9999.000000       0.153000
53565     53565     shanxi         111.4600       39.4283           82       166     2012      04        23        114              0.081958      21.520721       8.836523       0.166532       0.065000   -9999.000000       0.056700       1.000000
53565     53565     shanxi         111.4600       39.4283           82       166     2012      04        24        115              0.091000      21.454010       0.148177       0.221153   -9999.000000   -9999.000000       0.077600   -9999.000000
53565     53565     shanxi         111.4600       39.4283           82       166     2012      04        25        116              0.000000      14.069336       0.000000       0.237309   -9999.000000       0.153300       0.077200       0.165000
53565     53565     shanxi         111.4600       39.4283           82       166     2012      04        26        117              0.085417      12.677216       0.000000       0.219116       0.060000   -9999.000000       0.060600       0.138000
53565     53565     shanxi         111.4600       39.4283           82       166     2012      04        27        118              0.081875      17.230591       0.000000       0.204474       0.056000   -9999.000000   -9999.000000       0.219000
53565     53565     shanxi         111.4600       39.4283           82       166     2012      04        28        119              0.080083      16.325104       0.000000       0.192442       0.060000   -9999.000000       0.060000       0.137000
53565     53565     shanxi         111.4600       39.4283           82       166     2012      04        29        120              0.079000      19.623138       0.000000       0.181093       0.058000   -9999.000000       0.065900       0.051000
53565     53565     shanxi         111.4600       39.4283           82       166     2012      04        30        121              0.076500      22.839325       6.328808       0.172168       0.097000   -9999.000000   -9999.000000       0.910000
53565     53565     shanxi         111.4600       39.4283           82       166     2012      05        01        122              0.079000      21.079132       0.325219       0.208753       0.076500   -9999.000000       0.081500       0.184000
53565     53565     shanxi         111.4600       39.4283           82       166     2012      05        02        123              0.081458      19.403381       0.000000       0.231087       0.059500       0.134700       0.070300       0.195000
53565     53565     shanxi         111.4600       39.4283           82       166     2012      05        03        124              0.079000      21.298828       0.000000       0.206208       0.059000   -9999.000000       0.073500       0.175000
53565     53565     shanxi         111.4600       39.4283           82       166     2012      05        04        125              0.074708      22.996765       0.086876       0.187550       0.058000   -9999.000000       0.060600       0.058000
53565     53565     shanxi         111.4600       39.4283           82       166     2012      05        05        126              0.069375      24.301849       0.000000       0.174722       0.052000       0.237600       0.067100       0.111000
53565     53565     shanxi         111.4600       39.4283           82       166     2012      05        06        127              0.062958      23.901459       0.000000       0.165757       0.054500   -9999.000000   -9999.000000       0.181000
53565     53565     shanxi         111.4600       39.4283           82       166     2012      05        07        128              0.057565      25.873260       0.765352       0.161026   -9999.000000   -9999.000000       0.081500       0.255000
53565     53565     shanxi         111.4600       39.4283           82       166     2012      05        08        129              0.052913      25.054382       0.129859       0.167727       0.059000       0.109500       0.085300   -9999.000000
53565     53565     shanxi         111.4600       39.4283           82       166     2012      05        09        130              0.047478      26.265594       0.185850       0.164227       0.068000   -9999.000000       0.065100       0.084000
53565     53565     shanxi         111.4600       39.4283           82       166     2012      05        10        131              0.048227      23.482208       7.750998       0.163626       0.101000   -9999.000000       0.072900       0.098000
53565     53565     shanxi         111.4600       39.4283           82       166     2012      05        11        132              0.068750      25.571625       0.516781       0.195527       0.098000   -9999.000000       0.110300       0.789000
53565     53565     shanxi         111.4600       39.4283           82       166     2012      05        12        133              0.068708      18.700104       0.000000       0.241630       0.063500       0.224900       0.088000       0.150000
53565     53565     shanxi         111.4600       39.4283           82       166     2012      05        13        134              0.061958      18.281403       0.000000       0.213220       0.061000       0.250100       0.075300   -9999.000000
53565     53565     shanxi         111.4600       39.4283           82       166     2012      05        14        135              0.057500      16.751709       0.000000       0.198166       0.057000   -9999.000000       0.084500       0.113000
53565     53565     shanxi         111.4600       39.4283           82       166     2012      05        15        136              0.054417      17.178741       0.079720       0.186639       0.058000   -9999.000000       0.071300       0.103000
53565     53565     shanxi         111.4600       39.4283           82       166     2012      05        16        137              0.049833      19.906403       0.000000       0.176778       0.053000   -9999.000000       0.075400       0.092000
53565     53565     shanxi         111.4600       39.4283           82       166     2012      05        17        138              0.045875      20.370972       0.000000       0.169390       0.054500   -9999.000000       0.076000       0.189000
53565     53565     shanxi         111.4600       39.4283           82       166     2012      05        18        139              0.041870      23.866974       0.389542       0.162664       0.058000       0.026600       0.088700   -9999.000000
53565     53565     shanxi         111.4600       39.4283           82       166     2012      05        19        140              0.039000      24.357697       0.075384       0.163483       0.059000       0.134900       0.078200       0.170000
53565     53565     shanxi         111.4600       39.4283           82       166     2012      05        20        141              0.035500      26.728088       0.000000       0.160088   -9999.000000       0.107100       0.081400       0.281000
53565     53565     shanxi         111.4600       39.4283           82       166     2012      05        21        142              0.040696      28.249725       5.098243       0.156558       0.100000       0.199200       0.126300       0.199000
53565     53565     shanxi         111.4600       39.4283           82       166     2012      05        22        143              0.063292      17.652405       0.000000       0.217975       0.064000   -9999.000000       0.083500       0.168000
53565     53565     shanxi         111.4600       39.4283           82       166     2012      05        23        144              0.062353      19.930542       0.000000       0.206019   -9999.000000       0.173200   -9999.000000   -9999.000000
53565     53565     shanxi         111.4600       39.4283           82       166     2012      05        24        145              0.057625      19.740082       0.000000       0.187321       0.063000   -9999.000000       0.078900       0.171000
53565     53565     shanxi         111.4600       39.4283           82       166     2012      05        25        146              0.000000      21.867310       0.502917       0.174426       0.056500       0.022600       0.090000       0.209000
53565     53565     shanxi         111.4600       39.4283           82       166     2012      05        26        147              0.046375      20.306976       0.000000       0.174018       0.053000       0.018800       0.073400       0.227000
53565     53565     shanxi         111.4600       39.4283           82       166     2012      05        27        148              0.040625      24.344299       0.000000       0.164999       0.057000   -9999.000000       0.074100       0.117000
53565     53565     shanxi         111.4600       39.4283           82       166     2012      05        28        149              0.040792      27.106171      12.204323       0.157407       0.054000       0.061200       0.077800       0.064000
53565     53565     shanxi         111.4600       39.4283           82       166     2012      05        29        150              0.068375      26.594604       0.144500       0.203029       0.068000   -9999.000000       0.100700       0.379000
53565     53565     shanxi         111.4600       39.4283           82       166     2012      05        30        151              0.066542      19.563507       0.000000       0.252539       0.058000   -9999.000000       0.081700   -9999.000000
53565     53565     shanxi         111.4600       39.4283           82       166     2012      05        31        152              0.153042      21.231262      11.668801       0.219818       0.117000       0.112300   -9999.000000   -9999.000000
53565     53565     shanxi         111.4600       39.4283           82       166     2012      06        01        153              0.153083      20.019897       0.000000       0.277338       0.088000   -9999.000000       0.096600       0.565000
53565     53565     shanxi         111.4600       39.4283           82       166     2012      06        02        154              0.124375      21.750427       1.439177       0.254244       0.071000       0.280700       0.089100       0.336000
53565     53565     shanxi         111.4600       39.4283           82       166     2012      06        03        155              0.151500      21.069763       8.216036       0.247585       0.104000   -9999.000000       0.120900       0.800000
53565     53565     shanxi         111.4600       39.4283           82       166     2012      06        04        156              0.128750      21.457977       0.000000       0.286463       0.065000       0.201100       0.105100       0.479000
53565     53565     shanxi         111.4600       39.4283           82       166     2012      06        05        157              0.109125      24.168152       1.367637       0.247132       0.073000       0.114800       0.115200       0.363000
53565     53565     shanxi         111.4600       39.4283           82       166     2012      06        06        158              0.104167      25.981964       5.788041       0.230451       0.103000   -9999.000000       0.141100   -9999.000000
53565     53565     shanxi         111.4600       39.4283           82       166     2012      06        07        159              0.103167      20.640350       0.725691       0.273390       0.094000   -9999.000000       0.127100       0.788000
53565     53565     shanxi         111.4600       39.4283           82       166     2012      06        08        160              0.096667      20.500824       0.499800       0.257530       0.057000       0.269400       0.104300       0.319000
53565     53565     shanxi         111.4600       39.4283           82       166     2012      06        09        161              0.081583      24.198151       1.605968       0.240168   -9999.000000   -9999.000000   -9999.000000       0.497000
53565     53565     shanxi         111.4600       39.4283           82       166     2012      06        10        162              0.070167      22.194336       0.000000       0.241245       0.064500       0.129800       0.097500       0.326000
53565     53565     shanxi         111.4600       39.4283           82       166     2012      06        11        163              0.000000      21.164734       0.000000       0.222302       0.067000   -9999.000000       0.099300   -9999.000000
53565     53565     shanxi         111.4600       39.4283           82       166     2012      06        12        164              0.047500      22.919830       0.000000       0.206562       0.062500       0.044000       0.090600       0.259000
53565     53565     shanxi         111.4600       39.4283           82       166     2012      06        13        165              0.040708      24.830597       0.121722       0.193954       0.064500       0.052900       0.090100       0.223000
53565     53565     shanxi         111.4600       39.4283           82       166     2012      06        14        166              0.037208      22.900055       0.000000       0.187635       0.066000   -9999.000000       0.093100       0.235000
53565     53565     shanxi         111.4600       39.4283           82       166     2012      06        15        167              0.035250      21.616577       0.000000       0.184569       0.062000       0.099900       0.097200       0.362000
53565     53565     shanxi         111.4600       39.4283           82       166     2012      06        16        168              0.033583      23.922729       0.000000       0.177934       0.060000   -9999.000000       0.093000   -9999.000000
53565     53565     shanxi         111.4600       39.4283           82       166     2012      06        17        169              0.030667      26.727997       0.000000       0.169768       0.064500       0.130600       0.101600       0.265000
53565     53565     shanxi         111.4600       39.4283           82       166     2012      06        18        170              0.027875      29.313324       0.029925       0.164104       0.062500       0.042000       0.089400       0.322000
53565     53565     shanxi         111.4600       39.4283           82       166     2012      06        19        171              0.025667      29.896088       2.016850       0.161652       0.069000   -9999.000000       0.092600       0.287000
53565     53565     shanxi         111.4600       39.4283           82       166     2012      06        20        172              0.031375      27.610535       1.582502       0.177352       0.068000       0.247300   -9999.000000       0.811000
53565     53565     shanxi         111.4600       39.4283           82       166     2012      06        21        173              0.036208      27.363129       0.612626       0.190975       0.076000   -9999.000000       0.101400   -9999.000000
53565     53565     shanxi         111.4600       39.4283           82       166     2012      06        22        174              0.035375      28.029449       3.071754       0.185436       0.098000   -9999.000000       0.133900       0.290000
53565     53565     shanxi         111.4600       39.4283           82       166     2012      06        23        175              0.052417      28.348602      10.713711       0.197771       0.089000       0.232600       0.063800       0.863000
53565     53565     shanxi         111.4600       39.4283           82       166     2012      06        24        176              0.091750      26.817322       1.003915       0.256684       0.098000   -9999.000000       0.117700       1.000000
53565     53565     shanxi         111.4600       39.4283           82       166     2012      06        25        177              0.091250      24.272125       1.953402       0.254902       0.084000       0.140500       0.114100       0.930000
53565     53565     shanxi         111.4600       39.4283           82       166     2012      06        26        178              0.097000      26.308746       2.631187       0.240059       0.109000   -9999.000000       0.160700       0.691000
53565     53565     shanxi         111.4600       39.4283           82       166     2012      06        27        179              0.095500      24.644562      10.480818       0.251117       0.116000   -9999.000000       0.165200       1.000000
53565     53565     shanxi         111.4600       39.4283           82       166     2012      06        28        180              0.146875      23.437286       2.816666       0.272179       0.130000       0.318200       0.160100       0.913000
53565     53565     shanxi         111.4600       39.4283           82       166     2012      06        29        181              0.132500      19.796936       0.000000       0.292159       0.105000   -9999.000000       0.134300       1.000000
53565     53565     shanxi         111.4600       39.4283           82       166     2012      06        30        182              0.115458      24.312073       0.000000       0.267300       0.074000       0.162800       0.110200   -9999.000000
53565     53565     shanxi         111.4600       39.4283           82       166     2012      07        01        183              0.104500      26.890778       0.000000       0.241893       0.075000       0.093400       0.102400       0.499000
53565     53565     shanxi         111.4600       39.4283           82       166     2012      07        02        184              0.097250      28.066437       0.000000       0.224545       0.075000   -9999.000000       0.106200       0.306000
53565     53565     shanxi         111.4600       39.4283           82       166     2012      07        03        185              0.096125      28.231781       4.023866       0.206178       0.082500       0.112200       0.131700       0.353000
53565     53565     shanxi         111.4600       39.4283           82       166     2012      07        04        186              0.098250      26.749176       2.981294       0.231958       0.081500   -9999.000000       0.141200       0.648000
53565     53565     shanxi         111.4600       39.4283           82       166     2012      07        05        187              0.092375      27.602692       0.043485       0.237875       0.074000   -9999.000000       0.106600   -9999.000000
53565     53565     shanxi         111.4600       39.4283           82       166     2012      07        06        188              0.088000      28.359497       0.000000       0.223651       0.075000   -9999.000000       0.103800       0.375000
53565     53565     shanxi         111.4600       39.4283           82       166     2012      07        07        189              0.080750      30.038605       0.193719       0.203822   -9999.000000   -9999.000000   -9999.000000       0.314000
53565     53565     shanxi         111.4600       39.4283           82       166     2012      07        08        190              0.113042      27.586975       9.031916       0.196371       0.103000       0.209500       0.136900       0.376000
53565     53565     shanxi         111.4600       39.4283           82       166     2012      07        09        191              0.134417      25.315948       0.940277       0.256537       0.091500   -9999.000000       0.110000       0.684000
53565     53565     shanxi         111.4600       39.4283           82       166     2012      07        10        192              0.119042      26.873627       0.313074       0.252995   -9999.000000   -9999.000000       0.094600   -9999.000000
53565     53565     shanxi         111.4600       39.4283           82       166     2012      07        11        193              0.108375      28.069275       0.000000       0.229328       0.073000       0.096100       0.083500       0.355000
53565     53565     shanxi         111.4600       39.4283           82       166     2012      07        12        194              0.100167      28.665405       0.000000       0.207332       0.079000   -9999.000000       0.084600       0.311000
53565     53565     shanxi         111.4600       39.4283           82       166     2012      07        13        195              0.096542      27.980469       1.464703       0.194648   -9999.000000       0.078400       0.098000       0.400000
53565     53565     shanxi         111.4600       39.4283           82       166     2012      07        14        196              0.101167      28.861359       3.600554       0.191854       0.094000   -9999.000000       0.101400       0.748000
53565     53565     shanxi         111.4600       39.4283           82       166     2012      07        15        197              0.112042      25.570618       0.315708       0.224172       0.085500   -9999.000000       0.097300   -9999.000000
53565     53565     shanxi         111.4600       39.4283           82       166     2012      07        16        198              0.104917      26.675476       0.498924       0.215956       0.075000       0.186600       0.103300       0.457000
53565     53565     shanxi         111.4600       39.4283           82       166     2012      07        17        199              0.120750      28.275116       0.095685       0.196242       0.076000   -9999.000000       0.108800       0.360000
53565     53565     shanxi         111.4600       39.4283           82       166     2012      07        18        200              0.132500      28.243073       1.615010       0.183636       0.079000   -9999.000000       0.103200       0.390000
53565     53565     shanxi         111.4600       39.4283           82       166     2012      07        19        201              0.127542      27.862457       0.352923       0.193859       0.080000       0.008400       0.106000       0.319000
53565     53565     shanxi         111.4600       39.4283           82       166     2012      07        20        202              0.133391      28.364655      54.129700       0.181371       0.074000   -9999.000000       0.087300   -9999.000000
53565     53565     shanxi         111.4600       39.4283           82       166     2012      07        21        203              0.265478      29.952332      69.792015       0.234169   -9999.000000       0.418300       0.153800       1.000000
53565     53565     shanxi         111.4600       39.4283           82       166     2012      07        22        204              0.224250      21.147766       0.199715       0.389811       0.134000   -9999.000000       0.151100       0.942000
53565     53565     shanxi         111.4600       39.4283           82       166     2012      07        23        205              0.205000      23.994568       0.351545       0.339298       0.116000   -9999.000000       0.148600       1.000000
53565     53565     shanxi         111.4600       39.4283           82       166     2012      07        24        206              0.194375      24.588989       3.211461       0.325619       0.125000       0.139000   -9999.000000       0.709000
53565     53565     shanxi         111.4600       39.4283           82       166     2012      07        25        207              0.206167      25.880859       7.861352       0.321328       0.149500   -9999.000000       0.165100       1.000000
53565     53565     shanxi         111.4600       39.4283           82       166     2012      07        26        208              0.197583      24.910919       2.864576       0.336889       0.121000       0.338100       0.150600       0.970000
53565     53565     shanxi         111.4600       39.4283           82       166     2012      07        27        209              0.200583      27.045471       3.667777       0.322208       0.138000   -9999.000000       0.152500       0.915000
53565     53565     shanxi         111.4600       39.4283           82       166     2012      07        28        210              0.218125      24.955597       8.984959       0.322517       0.130000   -9999.000000       0.111500       1.000000
53565     53565     shanxi         111.4600       39.4283           82       166     2012      07        29        211              0.205125      25.054413       0.000000       0.332763       0.118000       0.152600       0.140700       0.924000
53565     53565     shanxi         111.4600       39.4283           82       166     2012      07        30        212              0.232292      25.901093      17.430124       0.315720       0.134500   -9999.000000       0.172000       0.868000
53565     53565     shanxi         111.4600       39.4283           82       166     2012      07        31        213              0.227625      21.804077       0.216708       0.345644       0.131500   -9999.000000       0.150000       1.000000
53565     53565     shanxi         111.4600       39.4283           82       166     2012      08        01        214              0.210167      24.162567       1.613216       0.331047       0.137000   -9999.000000       0.151400       0.989000
53565     53565     shanxi         111.4600       39.4283           82       166     2012      08        02        215              0.201000      25.300079       0.226903       0.320572       0.116000   -9999.000000       0.131700       0.783000
53565     53565     shanxi         111.4600       39.4283           82       166     2012      08        03        216              0.187000      26.922607       0.218333       0.309884       0.119000       0.240500       0.124900   -9999.000000
53565     53565     shanxi         111.4600       39.4283           82       166     2012      08        04        217              0.179917      27.310333       0.113317       0.300681       0.110000   -9999.000000       0.122300       0.654000
53565     53565     shanxi         111.4600       39.4283           82       166     2012      08        05        218              0.174875      27.632141       0.000000       0.292224       0.102500       0.246000       0.121700       0.558000
53565     53565     shanxi         111.4600       39.4283           82       166     2012      08        06        219              0.168208      27.639038       1.183304       0.283863       0.127000       0.023300       0.140500       0.585000
53565     53565     shanxi         111.4600       39.4283           82       166     2012      08        07        220              0.163875      26.297760       2.523719       0.285620       0.133000   -9999.000000       0.120000       0.901000
53565     53565     shanxi         111.4600       39.4283           82       166     2012      08        08        221              0.161042      26.098907       0.000000       0.293984       0.109000       0.228700       0.125600   -9999.000000
53565     53565     shanxi         111.4600       39.4283           82       166     2012      08        09        222              0.156625      25.136597       0.224564       0.282149       0.106000   -9999.000000       0.125700       0.572000
53565     53565     shanxi         111.4600       39.4283           82       166     2012      08        10        223              0.151667      25.981689       0.293051       0.270202       0.096000   -9999.000000   -9999.000000       0.511000
53565     53565     shanxi         111.4600       39.4283           82       166     2012      08        11        224              0.215292      26.029724      31.894075       0.264021       0.141000       0.065300       0.153300       1.000000
53565     53565     shanxi         111.4600       39.4283           82       166     2012      08        12        225              0.212292      20.425385       0.000000       0.353804       0.122000   -9999.000000       0.152500       0.914000
53565     53565     shanxi         111.4600       39.4283           82       166     2012      08        13        226              0.192458      24.190582       1.620518       0.319110       0.109000   -9999.000000       0.131300   -9999.000000
53565     53565     shanxi         111.4600       39.4283           82       166     2012      08        14        227              0.190500      24.729919       0.617804       0.308237       0.132000   -9999.000000       0.144500       0.938000
53565     53565     shanxi         111.4600       39.4283           82       166     2012      08        15        228              0.178708      22.423309       0.000000       0.307819       0.118000   -9999.000000       0.132000       0.667000
53565     53565     shanxi         111.4600       39.4283           82       166     2012      08        16        229              0.167000      23.973267       0.136189       0.294867       0.111000   -9999.000000       0.135600       0.756000
53565     53565     shanxi         111.4600       39.4283           82       166     2012      08        17        230              0.163167      25.041840       8.741421       0.288007       0.135000       0.517400       0.142500       0.829000
53565     53565     shanxi         111.4600       39.4283           82       166     2012      08        18        231              0.188750      22.661102       0.084281       0.305377       0.146000   -9999.000000       0.152400   -9999.000000
53565     53565     shanxi         111.4600       39.4283           82       166     2012      08        19        232              0.176833      22.411896       4.638389       0.311121       0.119000   -9999.000000       0.126500       0.839000
53565     53565     shanxi         111.4600       39.4283           82       166     2012      08        20        233              0.172458      24.453522       0.000000       0.299031       0.117000       0.230600       0.153100       0.781000
53565     53565     shanxi         111.4600       39.4283           82       166     2012      08        21        234              0.160542      22.124512       0.000000       0.300247       0.104000       0.197900   -9999.000000       0.854000
53565     53565     shanxi         111.4600       39.4283           82       166     2012      08        22        235              0.152292      19.790588       0.000000       0.286417       0.084000       0.285000       0.132600   -9999.000000
53565     53565     shanxi         111.4600       39.4283           82       166     2012      08        23        236              0.145417      20.468597       0.000000       0.278703       0.098000       0.121200       0.144100       0.490000
53565     53565     shanxi         111.4600       39.4283           82       166     2012      08        24        237              0.138652      22.184570       0.000000       0.272461       0.099000   -9999.000000       0.120300       0.658000
53565     53565     shanxi         111.4600       39.4283           82       166     2012      08        25        238              0.000000      23.065552       2.105621       0.265965       0.122000   -9999.000000       0.128800       0.570000
53565     53565     shanxi         111.4600       39.4283           82       166     2012      08        26        239              0.125125      24.146454       0.620149       0.260907       0.106500       0.145300       0.132400       0.568000
53565     53565     shanxi         111.4600       39.4283           82       166     2012      08        27        240              0.118250      24.724884       2.122291       0.256121       0.112000   -9999.000000       0.144000       0.740000
53565     53565     shanxi         111.4600       39.4283           82       166     2012      08        28        241              0.111750      24.104218       0.000000       0.260643       0.105000       0.057900       0.112500       0.504000
53565     53565     shanxi         111.4600       39.4283           82       166     2012      08        29        242              0.103250      24.358276       0.000000       0.252626       0.096000   -9999.000000       0.122100       0.428000
53565     53565     shanxi         111.4600       39.4283           82       166     2012      08        30        243              0.096292      25.058533       0.071490       0.242837       0.105000   -9999.000000       0.108400       0.578000
53565     53565     shanxi         111.4600       39.4283           82       166     2012      08        31        244              0.093583      24.793976       6.375586       0.236653       0.113000       0.034400       0.132100       0.641000
53565     53565     shanxi         111.4600       39.4283           82       166     2012      09        01        245              0.188792      22.091949      25.352335       0.260325       0.134000       0.200500       0.145900   -9999.000000
53565     53565     shanxi         111.4600       39.4283           82       166     2012      09        02        246              0.205083      16.704254       0.290931       0.344356       0.143000   -9999.000000       0.140100       0.954000
53565     53565     shanxi         111.4600       39.4283           82       166     2012      09        03        247              0.185250      18.414337       0.157855       0.312009       0.129000       0.192700       0.127600       0.762000
53565     53565     shanxi         111.4600       39.4283           82       166     2012      09        04        248              0.169458      17.159058       0.000000       0.299219       0.118000   -9999.000000       0.132600       0.828000
53565     53565     shanxi         111.4600       39.4283           82       166     2012      09        05        249              0.158208      17.506500       0.000000       0.289278       0.119000       0.345600       0.110300       0.559000
53565     53565     shanxi         111.4600       39.4283           82       166     2012      09        06        250              0.149167      19.721405       0.203173       0.281840       0.108500   -9999.000000       0.121600   -9999.000000
53565     53565     shanxi         111.4600       39.4283           82       166     2012      09        07        251              0.142167      20.209900       0.000000       0.277754       0.106500   -9999.000000   -9999.000000       0.591000
53565     53565     shanxi         111.4600       39.4283           82       166     2012      09        08        252              0.134333      20.345947       0.000000       0.272649       0.102000       0.062200       0.107500       0.519000
53565     53565     shanxi         111.4600       39.4283           82       166     2012      09        09        253              0.126292      21.200256       0.000000       0.266399       0.100500       0.081400       0.115700       0.532000
53565     53565     shanxi         111.4600       39.4283           82       166     2012      09        10        254              0.119375      21.842987       2.285217       0.259187       0.116000       0.076400       0.123200       0.790000
53565     53565     shanxi         111.4600       39.4283           82       166     2012      09        11        255              0.117500      17.835938       0.092144       0.273618       0.096000   -9999.000000       0.104800   -9999.000000
53565     53565     shanxi         111.4600       39.4283           82       166     2012      09        12        256              0.113708      17.144501       0.066454       0.268610       0.091000   -9999.000000       0.108000       0.450000
53565     53565     shanxi         111.4600       39.4283           82       166     2012      09        13        257              0.111583      14.064484       0.218449       0.264077       0.094000       0.250000       0.119500       0.594000
53565     53565     shanxi         111.4600       39.4283           82       166     2012      09        14        258              0.111250      14.449036       0.000000       0.263431       0.089000   -9999.000000       0.099300       0.539000
53565     53565     shanxi         111.4600       39.4283           82       166     2012      09        15        259              0.109167      16.250061       0.358883       0.257954   -9999.000000   -9999.000000       0.117700       0.354000
53565     53565     shanxi         111.4600       39.4283           82       166     2012      09        16        260              0.105708      17.848022       0.903842       0.253367       0.097000       0.142000       0.108200   -9999.000000
53565     53565     shanxi         111.4600       39.4283           82       166     2012      09        17        261              0.103542      17.613678       0.130271       0.257843       0.098500   -9999.000000       0.097600       0.501000
53565     53565     shanxi         111.4600       39.4283           82       166     2012      09        18        262              0.100375      18.288727       0.497870       0.253590       0.084000       0.042000       0.093300       0.418000
53565     53565     shanxi         111.4600       39.4283           82       166     2012      09        19        263              0.098417      18.622223       0.000000       0.248641       0.098000   -9999.000000       0.093500       0.393000
53565     53565     shanxi         111.4600       39.4283           82       166     2012      09        20        264              0.095542      18.766724       6.966317       0.242863       0.094000   -9999.000000       0.112700       0.314000
53565     53565     shanxi         111.4600       39.4283           82       166     2012      09        21        265              0.108625      18.989777       0.320323       0.258423   -9999.000000       0.304000       0.111600       0.896000
53565     53565     shanxi         111.4600       39.4283           82       166     2012      09        22        266              0.118333      16.374969       0.000000       0.281139       0.089000   -9999.000000       0.106200       0.594000
53565     53565     shanxi         111.4600       39.4283           82       166     2012      09        23        267              0.117125      17.804626       0.000000       0.267756       0.086500       0.219300       0.104800       0.478000
53565     53565     shanxi         111.4600       39.4283           82       166     2012      09        24        268              0.118500      19.485199      13.041931       0.258336       0.094000   -9999.000000   -9999.000000       0.827000
53565     53565     shanxi         111.4600       39.4283           82       166     2012      09        25        269              0.210333      18.068176       2.950964       0.285202       0.133000   -9999.000000       0.121600       0.953000
53565     53565     shanxi         111.4600       39.4283           82       166     2012      09        26        270              0.193917      13.669037       0.000000       0.312748       0.121000       0.212400       0.135700       0.891000
53565     53565     shanxi         111.4600       39.4283           82       166     2012      09        27        271              0.182429      16.683655       0.293129       0.292287   -9999.000000       0.254100       0.113900       0.586000
53565     53565     shanxi         111.4600       39.4283           82       166     2012      09        28        272              0.163133      12.877075       0.000000       0.282777       0.087000   -9999.000000       0.109900       0.645000
53565     53565     shanxi         111.4600       39.4283           82       166     2012      09        29        273              0.157625      12.397858       0.000000       0.277327       0.091000   -9999.000000       0.114100       0.423000
53565     53565     shanxi         111.4600       39.4283           82       166     2012      09        30        274              0.150500      12.992493       0.000000       0.272380       0.088000   -9999.000000       0.117100   -9999.000000
53565     53565     shanxi         111.4600       39.4283           82       166     2012      10        01        275              0.144333      13.874756       0.000000       0.268175       0.084000   -9999.000000       0.083800       0.431000
53565     53565     shanxi         111.4600       39.4283           82       166     2012      10        02        276              0.138875      15.016449       0.000000       0.263480       0.081000   -9999.000000       0.090800       0.361000
53565     53565     shanxi         111.4600       39.4283           82       166     2012      10        03        277              0.134167      15.639282       1.655161       0.259592       0.077000   -9999.000000       0.081200       0.436000
53565     53565     shanxi         111.4600       39.4283           82       166     2012      10        04        278              0.133208      15.088531       6.583094       0.258730       0.125000   -9999.000000       0.122300       0.841000
53565     53565     shanxi         111.4600       39.4283           82       166     2012      10        05        279              0.137958      10.867371       0.118961       0.299480       0.116000       0.356000   -9999.000000   -9999.000000
53565     53565     shanxi         111.4600       39.4283           82       166     2012      10        06        280              0.135708      12.470428       0.000000       0.282009       0.096500       0.166900       0.098900       0.607000
53565     53565     shanxi         111.4600       39.4283           82       166     2012      10        07        281              0.131625      14.186401       0.000000       0.274127       0.095000   -9999.000000       0.111400       0.485000
53565     53565     shanxi         111.4600       39.4283           82       166     2012      10        08        282              0.131792      13.998383       2.630818       0.271824   -9999.000000   -9999.000000       0.118800       0.490000
53565     53565     shanxi         111.4600       39.4283           82       166     2012      10        09        283              0.135333      14.031525       0.000000       0.280891       0.090000       0.202700       0.096300       0.532000
53565     53565     shanxi         111.4600       39.4283           82       166     2012      10        10        284              0.131875      11.094116       0.000000       0.274828       0.092000   -9999.000000       0.104300   -9999.000000
53565     53565     shanxi         111.4600       39.4283           82       166     2012      10        11        285              0.128958      11.989044       0.000000       0.269463       0.080000       0.295000   -9999.000000       0.440000
53565     53565     shanxi         111.4600       39.4283           82       166     2012      10        12        286              0.125500      13.340027       0.000000       0.264663   -9999.000000   -9999.000000       0.087800       0.418000
53565     53565     shanxi         111.4600       39.4283           82       166     2012      10        13        287              0.121958      13.073547       0.000000       0.260374       0.077000   -9999.000000       0.099200       0.405000
53565     53565     shanxi         111.4600       39.4283           82       166     2012      10        14        288              0.119708      11.243805       0.000000       0.257635       0.075500       0.057900       0.089300       0.341000
53565     53565     shanxi         111.4600       39.4283           82       166     2012      10        15        289              0.123042      13.002808       7.402639       0.258349       0.073000       0.075300       0.090600   -9999.000000
53565     53565     shanxi         111.4600       39.4283           82       166     2012      10        16        290              0.151083      12.117035       3.363111       0.279322       0.121000       0.069100       0.130500       0.842000
53565     53565     shanxi         111.4600       39.4283           82       166     2012      10        17        291              0.145042       6.721954       1.589216       0.286485       0.110000   -9999.000000       0.101500       0.612000
53565     53565     shanxi         111.4600       39.4283           82       166     2012      10        18        292              0.140750       7.573547       0.000000       0.276015   -9999.000000   -9999.000000       0.093800       0.751000
53565     53565     shanxi         111.4600       39.4283           82       166     2012      10        19        293              0.137833       7.288025       0.000000       0.272539       0.092000       0.144100       0.106100       0.427000
53565     53565     shanxi         111.4600       39.4283           82       166     2012      10        20        294              0.134917      10.229736       2.287367       0.269362       0.089000   -9999.000000       0.088300       0.485000
53565     53565     shanxi         111.4600       39.4283           82       166     2012      10        21        295              0.197542      12.410675       8.424263       0.270542   -9999.000000       0.178100       0.123000       0.856000
53565     53565     shanxi         111.4600       39.4283           82       166     2012      10        22        296              0.197042       5.713470       0.390310       0.309020   -9999.000000       0.093700   -9999.000000       0.727000
53565     53565     shanxi         111.4600       39.4283           82       166     2012      10        23        297              0.185625       7.569855       0.108127       0.292792   -9999.000000   -9999.000000       0.096800       0.738000
53565     53565     shanxi         111.4600       39.4283           82       166     2012      10        24        298              0.177125       8.552917       0.000000       0.286799   -9999.000000       0.138700       0.100700       0.652000
53565     53565     shanxi         111.4600       39.4283           82       166     2012      10        25        299              0.000000       9.465302       0.000000       0.281527       0.087000       0.159700       0.086200       0.596000
53565     53565     shanxi         111.4600       39.4283           82       166     2012      10        26        300              0.162458      10.169189       0.300173       0.277703       0.096000       0.431900       0.091200       0.681000
53565     53565     shanxi         111.4600       39.4283           82       166     2012      10        27        301              0.159417       8.196472       0.000000       0.279002       0.096000       0.320100       0.104400       0.658000
53565     53565     shanxi         111.4600       39.4283           82       166     2012      10        28        302              0.000000       7.364319       0.000000       0.278084   -9999.000000   -9999.000000   -9999.000000       0.532000
53565     53565     shanxi         111.4600       39.4283           82       166     2012      10        29        303              0.150125      10.007202       0.285081       0.275573   -9999.000000   -9999.000000       0.067800   -9999.000000
53565     53565     shanxi         111.4600       39.4283           82       166     2012      10        30        304              0.144792       6.017365       0.000000       0.263233       0.086000   -9999.000000       0.080400       0.279000
53565     53565     shanxi         111.4600       39.4283           82       166     2012      10        31        305              0.141333       4.730530       0.036535       0.262459       0.079000   -9999.000000       0.074900       0.316000
53565     53565     shanxi         111.4600       39.4283           82       166     2012      11        01        306              0.140000       5.792999       0.000000       0.266871       0.085000       0.090500       0.083100       0.394000
53565     53565     shanxi         111.4600       39.4283           82       166     2012      11        02        307              0.139500       6.815887       0.621199       0.268668       0.079000   -9999.000000       0.082300       0.352000
53565     53565     shanxi         111.4600       39.4283           82       166     2012      11        03        308              0.150167       8.601379       0.726232       0.267145   -9999.000000   -9999.000000       0.063700   -9999.000000
53565     53565     shanxi         111.4600       39.4283           82       166     2012      11        04        309              0.160167      -1.034180       4.658842       0.197056   -9999.000000   -9999.000000       0.052500       0.536000
53565     53565     shanxi         111.4600       39.4283           82       166     2012      11        05        310              0.163333      -2.818909       0.544607       0.150581   -9999.000000       0.223300       0.052700       0.502000
53565     53565     shanxi         111.4600       39.4283           82       166     2012      11        06        311              0.171000      -1.382660       0.337187       0.169332       0.108000       0.078800       0.068400       0.576000
53565     53565     shanxi         111.4600       39.4283           82       166     2012      11        07        312              0.175167       0.587982       0.000000       0.201792   -9999.000000   -9999.000000       0.073500       0.487000
53565     53565     shanxi         111.4600       39.4283           82       166     2012      11        08        313              0.185417       1.295197       0.000000       0.217804   -9999.000000       0.065500   -9999.000000   -9999.000000
53565     53565     shanxi         111.4600       39.4283           82       166     2012      11        09        314              0.215292       2.980469       0.049554       0.248171       0.084000       0.047900       0.057000       0.633000
53565     53565     shanxi         111.4600       39.4283           82       166     2012      11        10        315              0.216625       3.076813       2.357658       0.260282   -9999.000000       0.183800       0.047300       0.437000
53565     53565     shanxi         111.4600       39.4283           82       166     2012      11        11        316              0.204625      -1.250946       0.073073       0.193484   -9999.000000       0.110800       0.045100       0.474000
53565     53565     shanxi         111.4600       39.4283           82       166     2012      11        12        317              0.195542      -2.809387       0.000000       0.149562   -9999.000000       0.149800       0.046100       0.423000
53565     53565     shanxi         111.4600       39.4283           82       166     2012      11        13        318              0.000000      -1.906097       0.000000       0.165253   -9999.000000   -9999.000000       0.042800   -9999.000000
53565     53565     shanxi         111.4600       39.4283           82       166     2012      11        14        319              0.177500      -2.572937       0.000000       0.156078   -9999.000000       0.088300       0.046000       0.486000
53565     53565     shanxi         111.4600       39.4283           82       166     2012      11        15        320              0.171818      -0.597656       0.000000       0.182237   -9999.000000   -9999.000000       0.040600       0.412000
53565     53565     shanxi         111.4600       39.4283           82       166     2012      11        16        321              0.171522      -0.624207       0.000000       0.183848   -9999.000000       0.054300       0.041000       0.353000
53565     53565     shanxi         111.4600       39.4283           82       166     2012      11        17        322              0.000000      -1.764099       0.000000       0.161426       0.091000   -9999.000000       0.054500       0.456000
53565     53565     shanxi         111.4600       39.4283           82       166     2012      11        18        323              0.163917       0.076385       0.000000       0.190547   -9999.000000       0.155200       0.048700       0.606000
53565     53565     shanxi         111.4600       39.4283           82       166     2012      11        19        324              0.152609      -0.346344       0.000000       0.191294   -9999.000000       0.079300       0.048100       0.331000
53565     53565     shanxi         111.4600       39.4283           82       166     2012      11        20        325              0.151000      -0.348267       0.000000       0.186097   -9999.000000   -9999.000000       0.047500       0.396000
53565     53565     shanxi         111.4600       39.4283           82       166     2012      11        21        326              0.185458       0.935333       0.000000       0.206531   -9999.000000   -9999.000000       0.039900       0.487000
53565     53565     shanxi         111.4600       39.4283           82       166     2012      11        22        327              0.188708       1.614838       0.000000       0.224040   -9999.000000   -9999.000000       0.034000       0.436000
53565     53565     shanxi         111.4600       39.4283           82       166     2012      11        23        328              0.160167      -1.319641       0.000000       0.178162   -9999.000000       0.220800       0.039700       0.497000
53565     53565     shanxi         111.4600       39.4283           82       166     2012      11        24        329              0.132625      -2.045502       0.000000       0.158695   -9999.000000       0.050600       0.039000       0.292000
53565     53565     shanxi         111.4600       39.4283           82       166     2012      11        25        330              0.109583      -0.452667       0.000000       0.180668   -9999.000000       0.154800   -9999.000000       0.477000
53565     53565     shanxi         111.4600       39.4283           82       166     2012      11        26        331              0.082167      -2.412079       0.000000       0.159007   -9999.000000       0.051100   -9999.000000       0.356000
53565     53565     shanxi         111.4600       39.4283           82       166     2012      11        27        332              0.077042      -1.599976       0.000000       0.161292   -9999.000000       0.032900       0.037200   -9999.000000
53565     53565     shanxi         111.4600       39.4283           82       166     2012      11        28        333              0.070042      -2.112366       0.000000       0.168316   -9999.000000       0.170600       0.039300       0.297000
53565     53565     shanxi         111.4600       39.4283           82       166     2012      11        29        334              0.066708      -4.342651       0.000000       0.141870   -9999.000000       0.036400       0.039800       0.220000
53565     53565     shanxi         111.4600       39.4283           82       166     2012      11        30        335              0.066542      -3.965698       0.000000       0.144950   -9999.000000       0.201100       0.039300       0.273000
53565     53565     shanxi         111.4600       39.4283           82       166     2012      12        01        336              0.068750      -2.860718       0.000000       0.148953   -9999.000000   -9999.000000       0.040400       0.196000
53565     53565     shanxi         111.4600       39.4283           82       166     2012      12        02        337              0.067292      -2.102661       0.000000       0.156778   -9999.000000       0.062600       0.035900   -9999.000000
53565     53565     shanxi         111.4600       39.4283           82       166     2012      12        03        338              0.062958      -3.052399       0.000000       0.153127   -9999.000000       0.193300       0.039100       0.276000
53565     53565     shanxi         111.4600       39.4283           82       166     2012      12        04        339              0.063083      -4.777832       0.000000       0.135081   -9999.000000       0.045600       0.036600       0.228000
53565     53565     shanxi         111.4600       39.4283           82       166     2012      12        05        340              0.060250      -4.606964       0.000000       0.139146   -9999.000000   -9999.000000       0.039700       0.257000
53565     53565     shanxi         111.4600       39.4283           82       166     2012      12        06        341              0.060208      -6.684082       0.000000       0.124035   -9999.000000       0.048700   -9999.000000       0.184000
53565     53565     shanxi         111.4600       39.4283           82       166     2012      12        07        342              0.059750      -5.873871       0.000000       0.124523   -9999.000000   -9999.000000       0.034000   -9999.000000
53565     53565     shanxi         111.4600       39.4283           82       166     2012      12        08        343              0.057750      -8.703888       0.000000       0.120930   -9999.000000   -9999.000000       0.035800       0.177000
53565     53565     shanxi         111.4600       39.4283           82       166     2012      12        09        344              0.057792     -10.191803       0.000000       0.116462   -9999.000000   -9999.000000       0.029400       0.111000
53565     53565     shanxi         111.4600       39.4283           82       166     2012      12        10        345              0.058833      -6.891113       0.000000       0.118444   -9999.000000   -9999.000000       0.034800       0.161000
53565     53565     shanxi         111.4600       39.4283           82       166     2012      12        11        346              0.059167      -6.239563       0.000000       0.127212   -9999.000000       0.305400       0.038900       0.193000
53565     53565     shanxi         111.4600       39.4283           82       166     2012      12        12        347              0.060500      -4.400177       0.000000       0.136405   -9999.000000       0.082200   -9999.000000   -9999.000000
53565     53565     shanxi         111.4600       39.4283           82       166     2012      12        13        348              0.062250      -3.219727       0.000000       0.149237   -9999.000000   -9999.000000       0.034700       0.140000
53565     53565     shanxi         111.4600       39.4283           82       166     2012      12        14        349              0.064826      -3.095825       0.000000       0.139853   -9999.000000   -9999.000000       0.035300       0.125000
53565     53565     shanxi         111.4600       39.4283           82       166     2012      12        15        350              0.000000      -2.355621       0.000000       0.149638   -9999.000000       0.000500       0.041800       0.277000
53565     53565     shanxi         111.4600       39.4283           82       166     2012      12        16        351              0.068625      -1.286041       0.000000       0.169198   -9999.000000   -9999.000000       0.036000       0.179000
53565     53565     shanxi         111.4600       39.4283           82       166     2012      12        17        352              0.063333      -2.739929       0.000000       0.157559   -9999.000000       0.219900       0.029500       0.247000
53565     53565     shanxi         111.4600       39.4283           82       166     2012      12        18        353              0.060417      -7.726776       0.000000       0.122715   -9999.000000   -9999.000000       0.037600       0.188000
53565     53565     shanxi         111.4600       39.4283           82       166     2012      12        19        354              0.060458      -6.714417       0.000000       0.119987   -9999.000000   -9999.000000       0.033500       0.120000
53565     53565     shanxi         111.4600       39.4283           82       166     2012      12        20        355              0.000000      -5.102966       0.000000       0.132597   -9999.000000   -9999.000000       0.027200       0.131000
53565     53565     shanxi         111.4600       39.4283           82       166     2012      12        21        356              0.063167      -5.642029       0.000000       0.126101   -9999.000000   -9999.000000       0.030800       0.139000
53565     53565     shanxi         111.4600       39.4283           82       166     2012      12        22        357              0.060958      -8.636017       0.000000       0.120217   -9999.000000   -9999.000000       0.030300       0.065000
53565     53565     shanxi         111.4600       39.4283           82       166     2012      12        23        358              0.059708     -13.715302       0.000000       0.115281   -9999.000000   -9999.000000   -9999.000000       0.061000
53565     53565     shanxi         111.4600       39.4283           82       166     2012      12        24        359              0.059056     -14.713165       0.000000       0.111869   -9999.000000   -9999.000000       0.029500       0.105000
53565     53565     shanxi         111.4600       39.4283           82       166     2012      12        25        360              0.058833     -13.249664       0.000000       0.112311   -9999.000000   -9999.000000       0.029200       0.123000
53565     53565     shanxi         111.4600       39.4283           82       166     2012      12        26        361              0.000000     -11.456421       0.000000       0.112990   -9999.000000   -9999.000000       0.034200   -9999.000000
53565     53565     shanxi         111.4600       39.4283           82       166     2012      12        27        362              0.059583      -8.184479       0.000000       0.114507   -9999.000000   -9999.000000       0.034000       0.129000
53565     53565     shanxi         111.4600       39.4283           82       166     2012      12        28        363              0.060000      -6.120392       0.000000       0.121269   -9999.000000   -9999.000000       0.031900       0.109000
53565     53565     shanxi         111.4600       39.4283           82       166     2012      12        29        364              0.000000      -8.909180       0.000000       0.116472   -9999.000000   -9999.000000       0.033800       0.141000
53565     53565     shanxi         111.4600       39.4283           82       166     2012      12        30        365              0.000000     -11.967712       0.000000       0.114571   -9999.000000   -9999.000000       0.029000       0.103000
53565     53565     shanxi         111.4600       39.4283           82       166     2012      12        31        366              0.058800      -9.903503       0.000000       0.114602   -9999.000000   -9999.000000       0.032700   -9999.000000
