# Supplementary material for: Research on Fusing Multisatellite Soil Moisture Data Based on Bayesian Model Averaging
Source: Hindawi journal article supplement (doi:10.1155/2018/9310838), 2018-06-25
Supplement: f1 [file 9310838.f1.zip › 2012_sm00-10cm_daily_ZDB_ZHY_53574_366days_allin.txt]

53574     53574     shanxi         112.2850       39.5494           82       169     2012      01        01        001              0.000000   -9999.000000      29.919085   -9999.000000   -9999.000000   -9999.000000       0.033900   -9999.000000
53574     53574     shanxi         112.2850       39.5494           82       169     2012      01        02        002              0.004958      -7.366608       3.835040       0.094169   -9999.000000   -9999.000000       0.039200       0.002000
53574     53574     shanxi         112.2850       39.5494           82       169     2012      01        03        003              0.000000     -11.190918       0.000000       0.091764   -9999.000000   -9999.000000   -9999.000000       0.044000
53574     53574     shanxi         112.2850       39.5494           82       169     2012      01        04        004              0.004417     -13.881653       0.000000       0.090669   -9999.000000   -9999.000000       0.038600   -9999.000000
53574     53574     shanxi         112.2850       39.5494           82       169     2012      01        05        005              0.004500     -12.687347       6.887420       0.090513   -9999.000000   -9999.000000       0.045500       0.092000
53574     53574     shanxi         112.2850       39.5494           82       169     2012      01        06        006              0.004458     -10.889618       0.000000       0.091092   -9999.000000   -9999.000000       0.036100       0.063000
53574     53574     shanxi         112.2850       39.5494           82       169     2012      01        07        007              0.004792      -9.150024       0.138504       0.092294   -9999.000000   -9999.000000       0.037900       0.031000
53574     53574     shanxi         112.2850       39.5494           82       169     2012      01        08        008              0.000000      -7.941925       0.336247       0.095107   -9999.000000   -9999.000000       0.040100       0.040000
53574     53574     shanxi         112.2850       39.5494           82       169     2012      01        09        009              0.004667      -9.056915       0.000000       0.092016   -9999.000000   -9999.000000   -9999.000000       0.058000
53574     53574     shanxi         112.2850       39.5494           82       169     2012      01        10        010              0.004542      -9.344116       0.000000       0.091817   -9999.000000   -9999.000000       0.040500       0.017000
53574     53574     shanxi         112.2850       39.5494           82       169     2012      01        11        011              0.004375     -10.999939       0.165917       0.090689   -9999.000000   -9999.000000       0.046100       0.024000
53574     53574     shanxi         112.2850       39.5494           82       169     2012      01        12        012              0.004542      -9.701416       0.160275       0.090698   -9999.000000   -9999.000000       0.035700       0.055000
53574     53574     shanxi         112.2850       39.5494           82       169     2012      01        13        013              0.004667      -9.697174       0.173008       0.091545   -9999.000000   -9999.000000       0.042200       0.048000
53574     53574     shanxi         112.2850       39.5494           82       169     2012      01        14        014              0.004833      -9.608917       0.000000       0.091883   -9999.000000   -9999.000000   -9999.000000       0.071000
53574     53574     shanxi         112.2850       39.5494           82       169     2012      01        15        015              0.005000      -7.778046       0.000000       0.096047   -9999.000000   -9999.000000       0.043000       0.068000
53574     53574     shanxi         112.2850       39.5494           82       169     2012      01        16        016              0.004917      -7.592590       0.126419       0.101956   -9999.000000   -9999.000000       0.044600       0.033000
53574     53574     shanxi         112.2850       39.5494           82       169     2012      01        17        017              0.000000      -7.112183       0.000000       0.101747   -9999.000000   -9999.000000       0.033700       0.228000
53574     53574     shanxi         112.2850       39.5494           82       169     2012      01        18        018              0.004833      -8.179596       0.000000       0.101296   -9999.000000   -9999.000000       0.037000   -9999.000000
53574     53574     shanxi         112.2850       39.5494           82       169     2012      01        19        019              0.005167      -6.638702       0.165787       0.107418   -9999.000000   -9999.000000       0.042300       0.076000
53574     53574     shanxi         112.2850       39.5494           82       169     2012      01        20        020              0.005000      -6.595642       0.000000       0.106040   -9999.000000   -9999.000000   -9999.000000   -9999.000000
53574     53574     shanxi         112.2850       39.5494           82       169     2012      01        21        021              0.004917     -13.056396       0.206661       0.094764   -9999.000000   -9999.000000       0.033500       0.035000
53574     53574     shanxi         112.2850       39.5494           82       169     2012      01        22        022              0.004417     -16.361847       0.000000       0.091219   -9999.000000   -9999.000000       0.039800       0.091000
53574     53574     shanxi         112.2850       39.5494           82       169     2012      01        23        023              0.004000     -16.739105       0.000000       0.089918   -9999.000000   -9999.000000       0.028700   -9999.000000
53574     53574     shanxi         112.2850       39.5494           82       169     2012      01        24        024              0.004000     -16.019714       0.000000       0.090189   -9999.000000   -9999.000000   -9999.000000       0.013000
53574     53574     shanxi         112.2850       39.5494           82       169     2012      01        25        025              0.004083     -14.758453       0.000000       0.090525   -9999.000000   -9999.000000       0.033700       0.020000
53574     53574     shanxi         112.2850       39.5494           82       169     2012      01        26        026              0.004333     -12.379211       0.000000       0.091271   -9999.000000   -9999.000000       0.035800       0.052000
53574     53574     shanxi         112.2850       39.5494           82       169     2012      01        27        027              0.004333     -10.675446       0.000000       0.091595   -9999.000000   -9999.000000       0.033700       0.132000
53574     53574     shanxi         112.2850       39.5494           82       169     2012      01        28        028              0.004458      -8.826965       0.000000       0.093459   -9999.000000   -9999.000000       0.037000   -9999.000000
53574     53574     shanxi         112.2850       39.5494           82       169     2012      01        29        029              0.004333     -10.409637       0.000000       0.091544   -9999.000000   -9999.000000       0.029600       0.103000
53574     53574     shanxi         112.2850       39.5494           82       169     2012      01        30        030              0.004375     -10.274567       0.156640       0.091027   -9999.000000   -9999.000000       0.037600       0.092000
53574     53574     shanxi         112.2850       39.5494           82       169     2012      01        31        031              0.004625      -7.676514       0.200086       0.093005   -9999.000000   -9999.000000   -9999.000000       0.231000
53574     53574     shanxi         112.2850       39.5494           82       169     2012      02        01        032              0.004250      -9.117706       0.000000       0.101542   -9999.000000   -9999.000000       0.036700       0.107000
53574     53574     shanxi         112.2850       39.5494           82       169     2012      02        02        033              0.004042     -13.715485       0.000000       0.091637   -9999.000000   -9999.000000       0.040600   -9999.000000
53574     53574     shanxi         112.2850       39.5494           82       169     2012      02        03        034              0.004375     -11.561981       0.000000       0.091277   -9999.000000   -9999.000000       0.030400       0.125000
53574     53574     shanxi         112.2850       39.5494           82       169     2012      02        04        035              0.004667     -10.942810       0.064455       0.091643   -9999.000000   -9999.000000       0.034100       0.120000
53574     53574     shanxi         112.2850       39.5494           82       169     2012      02        05        036              0.004833      -7.191498       0.000000       0.098270   -9999.000000   -9999.000000       0.037800       0.142000
53574     53574     shanxi         112.2850       39.5494           82       169     2012      02        06        037              0.004458      -6.848572       0.000000       0.102718   -9999.000000   -9999.000000       0.042500       0.179000
53574     53574     shanxi         112.2850       39.5494           82       169     2012      02        07        038              0.004167     -13.097107       1.799289       0.092389   -9999.000000   -9999.000000       0.035900       0.042000
53574     53574     shanxi         112.2850       39.5494           82       169     2012      02        08        039              0.004208     -12.907959       0.000000       0.091209   -9999.000000   -9999.000000       0.043100       0.087000
53574     53574     shanxi         112.2850       39.5494           82       169     2012      02        09        040              0.004292     -11.732117       0.101267       0.091474   -9999.000000   -9999.000000       0.035300       0.133000
53574     53574     shanxi         112.2850       39.5494           82       169     2012      02        10        041              0.004417     -11.692413       0.000000       0.091336   -9999.000000   -9999.000000       0.040000       0.239000
53574     53574     shanxi         112.2850       39.5494           82       169     2012      02        11        042              0.004667      -9.395935       0.000000       0.093009   -9999.000000   -9999.000000       0.039600       0.065000
53574     53574     shanxi         112.2850       39.5494           82       169     2012      02        12        043              0.004833      -6.318451       0.000000       0.113219   -9999.000000   -9999.000000   -9999.000000       0.137000
53574     53574     shanxi         112.2850       39.5494           82       169     2012      02        13        044              0.005417      -5.765076       0.086900       0.107164   -9999.000000   -9999.000000   -9999.000000       0.002000
53574     53574     shanxi         112.2850       39.5494           82       169     2012      02        14        045              0.005292      -3.660126       0.000000       0.134243   -9999.000000   -9999.000000       0.045900       0.107000
53574     53574     shanxi         112.2850       39.5494           82       169     2012      02        15        046              0.004917      -5.539032       0.582670       0.127283   -9999.000000   -9999.000000       0.035900       0.162000
53574     53574     shanxi         112.2850       39.5494           82       169     2012      02        16        047              0.004625      -7.442719       0.000000       0.109205   -9999.000000   -9999.000000       0.042200   -9999.000000
53574     53574     shanxi         112.2850       39.5494           82       169     2012      02        17        048              0.004542     -10.051544       0.000000       0.095842   -9999.000000   -9999.000000   -9999.000000       0.030000
53574     53574     shanxi         112.2850       39.5494           82       169     2012      02        18        049              0.004542     -10.709778       0.000000       0.094394   -9999.000000   -9999.000000       0.041100       0.116000
53574     53574     shanxi         112.2850       39.5494           82       169     2012      02        19        050              0.004667      -9.836426       0.198817       0.095802   -9999.000000   -9999.000000       0.048200       0.128000
53574     53574     shanxi         112.2850       39.5494           82       169     2012      02        20        051              0.005250      -6.186584       0.205349       0.114074       0.074000   -9999.000000       0.037600       0.240000
53574     53574     shanxi         112.2850       39.5494           82       169     2012      02        21        052              0.006042      -2.778137       0.000000       0.147614   -9999.000000       0.007400   -9999.000000   -9999.000000
53574     53574     shanxi         112.2850       39.5494           82       169     2012      02        22        053              0.006667       1.087769       0.146153       0.173769   -9999.000000       0.164600       0.043100       0.173000
53574     53574     shanxi         112.2850       39.5494           82       169     2012      02        23        054              0.006417      -1.488220       0.201779       0.162527       0.065000       0.002900       0.046800       0.145000
53574     53574     shanxi         112.2850       39.5494           82       169     2012      02        24        055              0.006708      -0.110718       1.021603       0.160274   -9999.000000   -9999.000000       0.037400       0.130000
53574     53574     shanxi         112.2850       39.5494           82       169     2012      02        25        056              0.005625      -4.186096       0.000000       0.136298   -9999.000000   -9999.000000       0.043900       0.143000
53574     53574     shanxi         112.2850       39.5494           82       169     2012      02        26        057              0.006208      -6.529846       0.000000       0.104655   -9999.000000   -9999.000000       0.040300   -9999.000000
53574     53574     shanxi         112.2850       39.5494           82       169     2012      02        27        058              0.006667      -4.013397       0.195857       0.138567   -9999.000000   -9999.000000   -9999.000000       0.298000
53574     53574     shanxi         112.2850       39.5494           82       169     2012      02        28        059              0.007000      -1.932007       0.165070       0.150280       0.073000       0.056600       0.048200       0.256000
53574     53574     shanxi         112.2850       39.5494           82       169     2012      02        29        060              0.000000   -9999.000000       0.000000   -9999.000000       0.069000   -9999.000000   -9999.000000   -9999.000000
53574     53574     shanxi         112.2850       39.5494           82       169     2012      03        01        061              0.008000       0.698364       0.103933       0.171584   -9999.000000   -9999.000000       0.043300       0.166000
53574     53574     shanxi         112.2850       39.5494           82       169     2012      03        02        062              0.008417      -1.000519       0.197611       0.156320       0.086000   -9999.000000       0.048100   -9999.000000
53574     53574     shanxi         112.2850       39.5494           82       169     2012      03        03        063              0.008917       0.449249       0.000000       0.170100   -9999.000000   -9999.000000       0.045100       0.164000
53574     53574     shanxi         112.2850       39.5494           82       169     2012      03        04        064              0.010125      -0.553925       0.000000       0.162487       0.075000   -9999.000000       0.052000       0.138000
53574     53574     shanxi         112.2850       39.5494           82       169     2012      03        05        065              0.009708       0.382446       0.000000       0.170613   -9999.000000   -9999.000000   -9999.000000       0.235000
53574     53574     shanxi         112.2850       39.5494           82       169     2012      03        06        066              0.008583      -4.930878       0.184267       0.132488       0.084000   -9999.000000       0.042300       0.126000
53574     53574     shanxi         112.2850       39.5494           82       169     2012      03        07        067              0.000000      -4.185944       0.488014       0.126026       0.075000       0.001700       0.047200       0.205000
53574     53574     shanxi         112.2850       39.5494           82       169     2012      03        08        068              0.008250      -3.481049       0.000000       0.139412   -9999.000000   -9999.000000       0.042000       0.088000
53574     53574     shanxi         112.2850       39.5494           82       169     2012      03        09        069              0.009250      -2.901489       0.000000       0.142225   -9999.000000   -9999.000000       0.049000       0.324000
53574     53574     shanxi         112.2850       39.5494           82       169     2012      03        10        070              0.009125      -0.903900       0.000000       0.160915       0.072000   -9999.000000       0.046600       0.203000
53574     53574     shanxi         112.2850       39.5494           82       169     2012      03        11        071              0.008542      -5.026825       0.000000       0.131983       0.077000       0.154500       0.049100       0.084000
53574     53574     shanxi         112.2850       39.5494           82       169     2012      03        12        072              0.008958      -2.962769       0.000000       0.142782       0.073000       0.052700       0.041500       0.099000
53574     53574     shanxi         112.2850       39.5494           82       169     2012      03        13        073              0.009500      -1.191193       0.000000       0.153675   -9999.000000       0.190100       0.047500       0.246000
53574     53574     shanxi         112.2850       39.5494           82       169     2012      03        14        074              0.010957       0.099030       0.300809       0.166751   -9999.000000   -9999.000000   -9999.000000       0.220000
53574     53574     shanxi         112.2850       39.5494           82       169     2012      03        15        075              0.011958       3.052338       0.525045       0.188186   -9999.000000       0.132600       0.057300       0.484000
53574     53574     shanxi         112.2850       39.5494           82       169     2012      03        16        076              0.017292       2.050964       0.000000       0.205003       0.091000   -9999.000000       0.065300   -9999.000000
53574     53574     shanxi         112.2850       39.5494           82       169     2012      03        17        077              0.021625       3.965576       0.128960       0.206518       0.089000       0.058900       0.048900       0.501000
53574     53574     shanxi         112.2850       39.5494           82       169     2012      03        18        078              0.023042       3.898529       0.185130       0.199253   -9999.000000   -9999.000000       0.050700       0.324000
53574     53574     shanxi         112.2850       39.5494           82       169     2012      03        19        079              0.028375       2.012665       0.000000       0.186947   -9999.000000   -9999.000000       0.052600       0.436000
53574     53574     shanxi         112.2850       39.5494           82       169     2012      03        20        080              0.048417       2.455994       0.158044       0.195709       0.078000       0.003700       0.061000       0.465000
53574     53574     shanxi         112.2850       39.5494           82       169     2012      03        21        081              0.043000       4.538330       0.035832       0.207682   -9999.000000   -9999.000000       0.066200   -9999.000000
53574     53574     shanxi         112.2850       39.5494           82       169     2012      03        22        082              0.048083       1.806702       0.156111       0.203465   -9999.000000   -9999.000000   -9999.000000       0.551000
53574     53574     shanxi         112.2850       39.5494           82       169     2012      03        23        083              0.051792       2.433289       0.122690       0.203904   -9999.000000   -9999.000000       0.049100       0.293000
53574     53574     shanxi         112.2850       39.5494           82       169     2012      03        24        084              0.067167       0.759460       0.347678       0.174258   -9999.000000   -9999.000000   -9999.000000       0.418000
53574     53574     shanxi         112.2850       39.5494           82       169     2012      03        25        085              0.000000       3.928955       0.224802       0.197907       0.080000   -9999.000000       0.062000       0.381000
53574     53574     shanxi         112.2850       39.5494           82       169     2012      03        26        086              0.074667       5.525665       0.185522       0.203581       0.072000   -9999.000000       0.059900   -9999.000000
53574     53574     shanxi         112.2850       39.5494           82       169     2012      03        27        087              0.073792       6.304718       0.163231       0.208788       0.077000   -9999.000000       0.066600       0.382000
53574     53574     shanxi         112.2850       39.5494           82       169     2012      03        28        088              0.071875       7.154419       0.510476       0.208026       0.080000       0.045300       0.085100       0.733000
53574     53574     shanxi         112.2850       39.5494           82       169     2012      03        29        089              0.070917       9.452545       0.000000       0.223467   -9999.000000   -9999.000000       0.042900       0.657000
53574     53574     shanxi         112.2850       39.5494           82       169     2012      03        30        090              0.068625       6.828430       0.000000       0.203702   -9999.000000       0.013000       0.053800       0.344000
53574     53574     shanxi         112.2850       39.5494           82       169     2012      03        31        091              0.067875       3.070129       0.589070       0.203782       0.064000   -9999.000000       0.054300   -9999.000000
53574     53574     shanxi         112.2850       39.5494           82       169     2012      04        01        092              0.066250       6.261261       0.116465       0.205914       0.076000   -9999.000000       0.064700       0.329000
53574     53574     shanxi         112.2850       39.5494           82       169     2012      04        02        093              0.064375       8.289856       0.183451       0.215968       0.084000       0.041900       0.063200       0.301000
53574     53574     shanxi         112.2850       39.5494           82       169     2012      04        03        094              0.062583       3.160309       0.177401       0.186031   -9999.000000   -9999.000000       0.053300       0.334000
53574     53574     shanxi         112.2850       39.5494           82       169     2012      04        04        095              0.063250       5.298981       0.304306       0.205424   -9999.000000       0.064600       0.050000       0.290000
53574     53574     shanxi         112.2850       39.5494           82       169     2012      04        05        096              0.061875       7.240814       0.000000       0.205532       0.064000   -9999.000000       0.056200       0.230000
53574     53574     shanxi         112.2850       39.5494           82       169     2012      04        06        097              0.061125       7.245087       0.723816       0.209807       0.068000   -9999.000000       0.049900       0.279000
53574     53574     shanxi         112.2850       39.5494           82       169     2012      04        07        098              0.060167       8.957214       0.749359       0.209564       0.067000       0.020600       0.056500       0.378000
53574     53574     shanxi         112.2850       39.5494           82       169     2012      04        08        099              0.059208      10.114441       0.000000       0.203465   -9999.000000   -9999.000000   -9999.000000       0.396000
53574     53574     shanxi         112.2850       39.5494           82       169     2012      04        09        100              0.058250      11.585480       0.208711       0.201332       0.071000   -9999.000000       0.051100       0.121000
53574     53574     shanxi         112.2850       39.5494           82       169     2012      04        10        101              0.056500      12.700287       0.119057       0.200293   -9999.000000   -9999.000000       0.055200       0.127000
53574     53574     shanxi         112.2850       39.5494           82       169     2012      04        11        102              0.054417      10.089935       0.093264       0.199041       0.056000   -9999.000000       0.057200       0.407000
53574     53574     shanxi         112.2850       39.5494           82       169     2012      04        12        103              0.053833       4.300293       0.160840       0.192655       0.071000       0.098000       0.052200       0.514000
53574     53574     shanxi         112.2850       39.5494           82       169     2012      04        13        104              0.053667       8.155579       0.000000       0.203235       0.058000   -9999.000000       0.054700       0.357000
53574     53574     shanxi         112.2850       39.5494           82       169     2012      04        14        105              0.053167      11.379364       0.238742       0.198320   -9999.000000   -9999.000000       0.050200   -9999.000000
53574     53574     shanxi         112.2850       39.5494           82       169     2012      04        15        106              0.052250      12.705933       0.295693       0.194543       0.063000       0.049900       0.045400       0.175000
53574     53574     shanxi         112.2850       39.5494           82       169     2012      04        16        107              0.051208      11.496460       0.000000       0.187230       0.061500   -9999.000000       0.055900       0.333000
53574     53574     shanxi         112.2850       39.5494           82       169     2012      04        17        108              0.050500      12.305969       0.000000       0.186511       0.060000   -9999.000000       0.046900       0.241000
53574     53574     shanxi         112.2850       39.5494           82       169     2012      04        18        109              0.049667      15.323669       2.408838       0.182180       0.060000   -9999.000000   -9999.000000       0.440000
53574     53574     shanxi         112.2850       39.5494           82       169     2012      04        19        110              0.047958      12.865143       0.000000       0.207597       0.064000   -9999.000000       0.052900   -9999.000000
53574     53574     shanxi         112.2850       39.5494           82       169     2012      04        20        111              0.046500      12.316925       2.958175       0.203767       0.079000       0.027600       0.068700       0.113000
53574     53574     shanxi         112.2850       39.5494           82       169     2012      04        21        112              0.046625      12.840179       0.000000       0.213716       0.061000   -9999.000000       0.058700       0.361000
53574     53574     shanxi         112.2850       39.5494           82       169     2012      04        22        113              0.046375      13.855713       0.000000       0.215689       0.061000       0.060400       0.057700       0.256000
53574     53574     shanxi         112.2850       39.5494           82       169     2012      04        23        114              0.048458      17.594421      21.441650       0.199597       0.065000   -9999.000000       0.047600       0.826000
53574     53574     shanxi         112.2850       39.5494           82       169     2012      04        24        115              0.068458      18.056702       1.123738       0.249258   -9999.000000   -9999.000000       0.092300   -9999.000000
53574     53574     shanxi         112.2850       39.5494           82       169     2012      04        25        116              0.000000       9.471863       0.000000       0.281528   -9999.000000       0.091800   -9999.000000       0.363000
53574     53574     shanxi         112.2850       39.5494           82       169     2012      04        26        117              0.066583       8.283020       0.000000       0.260572       0.065500   -9999.000000       0.049500       0.554000
53574     53574     shanxi         112.2850       39.5494           82       169     2012      04        27        118              0.065083      13.305267       0.000000       0.246707       0.055000       0.046300   -9999.000000       0.207000
53574     53574     shanxi         112.2850       39.5494           82       169     2012      04        28        119              0.063792      11.367767       0.000000       0.236814       0.061000   -9999.000000       0.049000       0.299000
53574     53574     shanxi         112.2850       39.5494           82       169     2012      04        29        120              0.063292      14.656433       0.000000       0.227834       0.066500   -9999.000000       0.050900   -9999.000000
53574     53574     shanxi         112.2850       39.5494           82       169     2012      04        30        121              0.061833      18.003601       5.140479       0.220004       0.090000       0.281300       0.075600       0.157000
53574     53574     shanxi         112.2850       39.5494           82       169     2012      05        01        122              0.061333      16.614471       6.060618       0.245389       0.091000   -9999.000000       0.086900       0.650000
53574     53574     shanxi         112.2850       39.5494           82       169     2012      05        02        123              0.063000      14.912537       0.000000       0.272213       0.066500   -9999.000000       0.064600       0.361000
53574     53574     shanxi         112.2850       39.5494           82       169     2012      05        03        124              0.062458      16.812378       0.779037       0.249990       0.060000       0.106900       0.063700       0.258000
53574     53574     shanxi         112.2850       39.5494           82       169     2012      05        04        125              0.061833      18.128448       0.000000       0.235058       0.058000   -9999.000000       0.051800       0.125000
53574     53574     shanxi         112.2850       39.5494           82       169     2012      05        05        126              0.060750      19.269562       1.806167       0.222390       0.064000   -9999.000000       0.054200       0.259000
53574     53574     shanxi         112.2850       39.5494           82       169     2012      05        06        127              0.059792      19.073181       2.193317       0.211436       0.065000   -9999.000000   -9999.000000       0.304000
53574     53574     shanxi         112.2850       39.5494           82       169     2012      05        07        128              0.057542      21.252960       0.588747       0.200875   -9999.000000   -9999.000000       0.064900       0.459000
53574     53574     shanxi         112.2850       39.5494           82       169     2012      05        08        129              0.056583      20.335785       3.064578       0.202447       0.054000       0.111500       0.064200       0.190000
53574     53574     shanxi         112.2850       39.5494           82       169     2012      05        09        130              0.053250      21.831116       0.429900       0.200164       0.075000   -9999.000000       0.064600       0.359000
53574     53574     shanxi         112.2850       39.5494           82       169     2012      05        10        131              0.053667      18.196198       4.106362       0.227607   -9999.000000       0.168300       0.057000       0.269000
53574     53574     shanxi         112.2850       39.5494           82       169     2012      05        11        132              0.050000      21.964722       1.139006       0.224386       0.124000   -9999.000000       0.097700       0.787000
53574     53574     shanxi         112.2850       39.5494           82       169     2012      05        12        133              0.048542      15.833344       0.000000       0.246254       0.073000   -9999.000000       0.067400       0.313000
53574     53574     shanxi         112.2850       39.5494           82       169     2012      05        13        134              0.047167      14.179810       0.000000       0.227587       0.064000       0.135300       0.057300   -9999.000000
53574     53574     shanxi         112.2850       39.5494           82       169     2012      05        14        135              0.046208      12.932617       0.187704       0.216842       0.064000   -9999.000000       0.071700       0.138000
53574     53574     shanxi         112.2850       39.5494           82       169     2012      05        15        136              0.045167      12.899963       0.261520       0.209471   -9999.000000       0.059000       0.060400       0.228000
53574     53574     shanxi         112.2850       39.5494           82       169     2012      05        16        137              0.044667      15.231964       0.109219       0.201785       0.067000   -9999.000000       0.060600       0.308000
53574     53574     shanxi         112.2850       39.5494           82       169     2012      05        17        138              0.043792      15.631287       0.000000       0.195634       0.064000   -9999.000000       0.064000       0.167000
53574     53574     shanxi         112.2850       39.5494           82       169     2012      05        18        139              0.040833      19.412811       0.000000       0.185672       0.062000       0.104700       0.067800   -9999.000000
53574     53574     shanxi         112.2850       39.5494           82       169     2012      05        19        140              0.036583      21.445282       0.208730       0.177508   -9999.000000   -9999.000000       0.065300       0.178000
53574     53574     shanxi         112.2850       39.5494           82       169     2012      05        20        141              0.033458      21.851318       0.000000       0.174608       0.065000       0.052600       0.069100       0.268000
53574     53574     shanxi         112.2850       39.5494           82       169     2012      05        21        142              0.028708      22.053223       4.373549       0.171590       0.129000       0.155800       0.096500       0.192000
53574     53574     shanxi         112.2850       39.5494           82       169     2012      05        22        143              0.028042      14.736023       0.845120       0.217540       0.079000   -9999.000000       0.064700       0.258000
53574     53574     shanxi         112.2850       39.5494           82       169     2012      05        23        144              0.027583      15.941040       0.083289       0.210862   -9999.000000   -9999.000000   -9999.000000   -9999.000000
53574     53574     shanxi         112.2850       39.5494           82       169     2012      05        24        145              0.027250      16.430298       1.555949       0.198105       0.066000   -9999.000000       0.061700       0.194000
53574     53574     shanxi         112.2850       39.5494           82       169     2012      05        25        146              0.000000      17.758575       0.173922       0.187767       0.074000   -9999.000000       0.070200       0.212000
53574     53574     shanxi         112.2850       39.5494           82       169     2012      05        26        147              0.027500      15.970398       0.616760       0.185443       0.068000       0.046600       0.052800       0.181000
53574     53574     shanxi         112.2850       39.5494           82       169     2012      05        27        148              0.027708      20.185333       0.000000       0.174929       0.069000   -9999.000000       0.055400       0.353000
53574     53574     shanxi         112.2850       39.5494           82       169     2012      05        28        149              0.027583      21.612488      15.194962       0.166019       0.066000       0.137600       0.058600   -9999.000000
53574     53574     shanxi         112.2850       39.5494           82       169     2012      05        29        150              0.033625      22.983063       0.722772       0.203241       0.099000   -9999.000000       0.092600       0.647000
53574     53574     shanxi         112.2850       39.5494           82       169     2012      05        30        151              0.036333      15.722107       1.021089       0.263149       0.071000   -9999.000000       0.061900   -9999.000000
53574     53574     shanxi         112.2850       39.5494           82       169     2012      05        31        152              0.055250      17.088715      22.719086       0.234885       0.169000       0.214000   -9999.000000   -9999.000000
53574     53574     shanxi         112.2850       39.5494           82       169     2012      06        01        153              0.072792      15.062897       0.000000       0.313195       0.154000       0.175000       0.094000       0.622000
53574     53574     shanxi         112.2850       39.5494           82       169     2012      06        02        154              0.066208      17.109406       0.238442       0.272655       0.101500       0.308800       0.088900       0.422000
53574     53574     shanxi         112.2850       39.5494           82       169     2012      06        03        155              0.071000      17.912079       8.444420       0.259325       0.153000   -9999.000000       0.117200       0.915000
53574     53574     shanxi         112.2850       39.5494           82       169     2012      06        04        156              0.067833      17.987457       0.000000       0.288460       0.095000   -9999.000000       0.102900       0.407000
53574     53574     shanxi         112.2850       39.5494           82       169     2012      06        05        157              0.061333      20.421814       3.261695       0.257983       0.098000       0.190000       0.099900       0.390000
53574     53574     shanxi         112.2850       39.5494           82       169     2012      06        06        158              0.053375      21.446167       4.686056       0.249655       0.149000   -9999.000000       0.136900       0.915000
53574     53574     shanxi         112.2850       39.5494           82       169     2012      06        07        159              0.048875      17.203491       1.952117       0.279913       0.139000   -9999.000000       0.131600       0.563000
53574     53574     shanxi         112.2850       39.5494           82       169     2012      06        08        160              0.046208      16.675873       0.236977       0.270988       0.091500   -9999.000000       0.099700       0.488000
53574     53574     shanxi         112.2850       39.5494           82       169     2012      06        09        161              0.041125      20.054230       4.983240       0.255691   -9999.000000   -9999.000000   -9999.000000       0.447000
53574     53574     shanxi         112.2850       39.5494           82       169     2012      06        10        162              0.037125      18.018616       0.086605       0.268515       0.088500       0.200900       0.089900       0.371000
53574     53574     shanxi         112.2850       39.5494           82       169     2012      06        11        163              0.000000      16.605377       0.196855       0.252880       0.102000   -9999.000000       0.093600   -9999.000000
53574     53574     shanxi         112.2850       39.5494           82       169     2012      06        12        164              0.029417      17.881226       0.000000       0.239268       0.090000   -9999.000000       0.082200       0.221000
53574     53574     shanxi         112.2850       39.5494           82       169     2012      06        13        165              0.024609      19.254150       0.096541       0.229981       0.088000   -9999.000000       0.082300       0.188000
53574     53574     shanxi         112.2850       39.5494           82       169     2012      06        14        166              0.020917      18.414490       0.051644       0.224043       0.088000   -9999.000000       0.085900       0.389000
53574     53574     shanxi         112.2850       39.5494           82       169     2012      06        15        167              0.018083      16.353699       0.000000       0.221789       0.087000       0.032000       0.094200       0.256000
53574     53574     shanxi         112.2850       39.5494           82       169     2012      06        16        168              0.015292      18.555267       0.084264       0.215164       0.092000       0.164400       0.081600   -9999.000000
53574     53574     shanxi         112.2850       39.5494           82       169     2012      06        17        169              0.012250      21.567200       0.475285       0.204221       0.094000   -9999.000000       0.094500       0.256000
53574     53574     shanxi         112.2850       39.5494           82       169     2012      06        18        170              0.010583      24.164917       0.081858       0.192345       0.090000       0.120600       0.066800       0.309000
53574     53574     shanxi         112.2850       39.5494           82       169     2012      06        19        171              0.008500      24.212708       0.263077       0.185620       0.102000   -9999.000000       0.069600       0.375000
53574     53574     shanxi         112.2850       39.5494           82       169     2012      06        20        172              0.008000      23.597595       1.959944       0.182039       0.091000       0.022800       0.066200       0.609000
53574     53574     shanxi         112.2850       39.5494           82       169     2012      06        21        173              0.008000      22.094452       0.830679       0.199351       0.147000   -9999.000000       0.089700   -9999.000000
53574     53574     shanxi         112.2850       39.5494           82       169     2012      06        22        174              0.008000      22.876923      10.331116       0.204742       0.172000   -9999.000000       0.104100       0.425000
53574     53574     shanxi         112.2850       39.5494           82       169     2012      06        23        175              0.008458      23.623535       8.717256       0.246116       0.136500       0.246100       0.111600       0.979000
53574     53574     shanxi         112.2850       39.5494           82       169     2012      06        24        176              0.010917      23.087738       0.629443       0.271792       0.147000   -9999.000000       0.085300       0.969000
53574     53574     shanxi         112.2850       39.5494           82       169     2012      06        25        177              0.011833      21.494354       0.058209       0.261978   -9999.000000   -9999.000000       0.118800       0.536000
53574     53574     shanxi         112.2850       39.5494           82       169     2012      06        26        178              0.011875      22.840363       3.080156       0.244907       0.153000   -9999.000000   -9999.000000   -9999.000000
53574     53574     shanxi         112.2850       39.5494           82       169     2012      06        27        179              0.015208      21.525726      15.777925       0.253373   -9999.000000   -9999.000000       0.146200       0.908000
53574     53574     shanxi         112.2850       39.5494           82       169     2012      06        28        180              0.083958      20.063812       6.157885       0.275448       0.187500       0.189800       0.136200       1.000000
53574     53574     shanxi         112.2850       39.5494           82       169     2012      06        29        181              0.083000      17.433777       0.145171       0.302982       0.162500       0.224900       0.141600       1.000000
53574     53574     shanxi         112.2850       39.5494           82       169     2012      06        30        182              0.068250      20.950989       0.000000       0.276280       0.117000   -9999.000000       0.106000   -9999.000000
53574     53574     shanxi         112.2850       39.5494           82       169     2012      07        01        183              0.053792      23.247192       0.000000       0.256729       0.124000       0.050000       0.095500       0.409000
53574     53574     shanxi         112.2850       39.5494           82       169     2012      07        02        184              0.038958      24.050812       0.000000       0.242807       0.137000   -9999.000000       0.104700       0.370000
53574     53574     shanxi         112.2850       39.5494           82       169     2012      07        03        185              0.026833      23.915405       7.743042       0.230301       0.138500       0.032100       0.112000       0.780000
53574     53574     shanxi         112.2850       39.5494           82       169     2012      07        04        186              0.058083      24.194550       5.430912       0.247504       0.137000   -9999.000000       0.132100       0.816000
53574     53574     shanxi         112.2850       39.5494           82       169     2012      07        05        187              0.074708      23.098419       0.265541       0.274938       0.126000   -9999.000000       0.097500   -9999.000000
53574     53574     shanxi         112.2850       39.5494           82       169     2012      07        06        188              0.055792      25.166168       0.850607       0.255460   -9999.000000       0.173600       0.095900       0.308000
53574     53574     shanxi         112.2850       39.5494           82       169     2012      07        07        189              0.045542      25.955109       0.520732       0.238112   -9999.000000   -9999.000000       0.098900       0.335000
53574     53574     shanxi         112.2850       39.5494           82       169     2012      07        08        190              0.037917      23.242218       8.183842       0.235382       0.169000       0.028000       0.126200       0.467000
53574     53574     shanxi         112.2850       39.5494           82       169     2012      07        09        191              0.033000      22.408051       0.283307       0.265569       0.146000   -9999.000000       0.091500       0.656000
53574     53574     shanxi         112.2850       39.5494           82       169     2012      07        10        192              0.024792      23.835632       0.315248       0.258055       0.129000   -9999.000000       0.093100   -9999.000000
53574     53574     shanxi         112.2850       39.5494           82       169     2012      07        11        193              0.018333      24.326965       0.000000       0.241673       0.127000       0.179900       0.072100       0.485000
53574     53574     shanxi         112.2850       39.5494           82       169     2012      07        12        194              0.014292      24.362885       0.000000       0.226467       0.146000   -9999.000000       0.074800       0.396000
53574     53574     shanxi         112.2850       39.5494           82       169     2012      07        13        195              0.011792      23.257904       4.009589       0.218558       0.149000       0.043700   -9999.000000       0.448000
53574     53574     shanxi         112.2850       39.5494           82       169     2012      07        14        196              0.011000      23.563629      14.532744       0.234839       0.176000   -9999.000000       0.090700       0.917000
53574     53574     shanxi         112.2850       39.5494           82       169     2012      07        15        197              0.010417      20.980743       0.610992       0.289383       0.138000   -9999.000000       0.088800   -9999.000000
53574     53574     shanxi         112.2850       39.5494           82       169     2012      07        16        198              0.009417      22.183441       0.068409       0.265249       0.128000       0.080600       0.096000       0.677000
53574     53574     shanxi         112.2850       39.5494           82       169     2012      07        17        199              0.057583      22.904907       0.129917       0.246851       0.121000   -9999.000000       0.097100       0.405000
53574     53574     shanxi         112.2850       39.5494           82       169     2012      07        18        200              0.092750      23.528595       0.000000       0.234252       0.137000   -9999.000000       0.098900       0.390000
53574     53574     shanxi         112.2850       39.5494           82       169     2012      07        19        201              0.092083      23.078430       0.000000       0.228013       0.142000   -9999.000000       0.102600       0.613000
53574     53574     shanxi         112.2850       39.5494           82       169     2012      07        20        202              0.091609      23.654541      20.997271       0.219239       0.112000   -9999.000000       0.076600   -9999.000000
53574     53574     shanxi         112.2850       39.5494           82       169     2012      07        21        203              0.246391      25.333466      81.300545       0.236497   -9999.000000       0.141800       0.143900       1.000000
53574     53574     shanxi         112.2850       39.5494           82       169     2012      07        22        204              0.196375      18.663971       0.238813       0.351834       0.245000       0.259700       0.155900       0.918000
53574     53574     shanxi         112.2850       39.5494           82       169     2012      07        23        205              0.179417      21.030060       0.691874       0.302054       0.225000   -9999.000000       0.159000       0.966000
53574     53574     shanxi         112.2850       39.5494           82       169     2012      07        24        206              0.172542      21.609741       5.433360       0.289482       0.231000       0.318700   -9999.000000       0.875000
53574     53574     shanxi         112.2850       39.5494           82       169     2012      07        25        207              0.183208      23.143188       9.406273       0.290042       0.257500   -9999.000000       0.157200   -9999.000000
53574     53574     shanxi         112.2850       39.5494           82       169     2012      07        26        208              0.185458      21.701965       1.359808       0.311429       0.228500       0.408900       0.145000       0.948000
53574     53574     shanxi         112.2850       39.5494           82       169     2012      07        27        209              0.180333      24.263855       7.879135       0.292046       0.241000   -9999.000000       0.146800       0.894000
53574     53574     shanxi         112.2850       39.5494           82       169     2012      07        28        210              0.180375      22.787842       0.413206       0.293302       0.230500   -9999.000000       0.153500       0.884000
53574     53574     shanxi         112.2850       39.5494           82       169     2012      07        29        211              0.167417      23.199554       0.000000       0.290659       0.213000       0.089200       0.138400       0.817000
53574     53574     shanxi         112.2850       39.5494           82       169     2012      07        30        212              0.178458      23.666351      22.818069       0.273565   -9999.000000   -9999.000000       0.150000       0.874000
53574     53574     shanxi         112.2850       39.5494           82       169     2012      07        31        213              0.219583      19.486572       0.736830       0.308230       0.235000       0.122800       0.140900       0.969000
53574     53574     shanxi         112.2850       39.5494           82       169     2012      08        01        214              0.197125      20.440979       0.131931       0.307670       0.241000   -9999.000000       0.150800       0.830000
53574     53574     shanxi         112.2850       39.5494           82       169     2012      08        02        215              0.182208      22.456055       1.796322       0.289085       0.193000   -9999.000000       0.141600       0.941000
53574     53574     shanxi         112.2850       39.5494           82       169     2012      08        03        216              0.172292      23.844543       1.462968       0.284120       0.216000       0.169800       0.144000   -9999.000000
53574     53574     shanxi         112.2850       39.5494           82       169     2012      08        04        217              0.163792      24.560883       0.000000       0.278087       0.198000   -9999.000000       0.133600       0.789000
53574     53574     shanxi         112.2850       39.5494           82       169     2012      08        05        218              0.157000      24.987152       0.000000       0.266376       0.178000       0.157400       0.126900       0.591000
53574     53574     shanxi         112.2850       39.5494           82       169     2012      08        06        219              0.152083      24.362274      15.865463       0.258177       0.182000       0.056700       0.143600       0.694000
53574     53574     shanxi         112.2850       39.5494           82       169     2012      08        07        220              0.196125      23.483887      11.099134       0.296154       0.198000   -9999.000000   -9999.000000       1.000000
53574     53574     shanxi         112.2850       39.5494           82       169     2012      08        08        221              0.203875      23.777588       7.040316       0.306200       0.213000       0.142000       0.151700   -9999.000000
53574     53574     shanxi         112.2850       39.5494           82       169     2012      08        09        222              0.183833      22.256592       0.000000       0.287773       0.198000   -9999.000000       0.138300       0.792000
53574     53574     shanxi         112.2850       39.5494           82       169     2012      08        10        223              0.171042      22.742096       0.319686       0.272478       0.145000   -9999.000000   -9999.000000       0.664000
53574     53574     shanxi         112.2850       39.5494           82       169     2012      08        11        224              0.216750      22.329620      34.915001       0.264471       0.239000       0.150400       0.144900       0.892000
53574     53574     shanxi         112.2850       39.5494           82       169     2012      08        12        225              0.207500      17.579742       0.000000       0.332595       0.204000   -9999.000000       0.154400       0.917000
53574     53574     shanxi         112.2850       39.5494           82       169     2012      08        13        226              0.191583      21.200928       1.576083       0.297926       0.186000       0.265100       0.118800   -9999.000000
53574     53574     shanxi         112.2850       39.5494           82       169     2012      08        14        227              0.189792      21.427002       3.793450       0.286597       0.210000   -9999.000000       0.120900       0.901000
53574     53574     shanxi         112.2850       39.5494           82       169     2012      08        15        228              0.179875      19.464478       0.000000       0.294206       0.209000   -9999.000000       0.123700       0.797000
53574     53574     shanxi         112.2850       39.5494           82       169     2012      08        16        229              0.170125      20.602661       0.450539       0.279288       0.170500       0.212700       0.115700       0.844000
53574     53574     shanxi         112.2850       39.5494           82       169     2012      08        17        230              0.167458      21.783295       0.713111       0.271675       0.179000   -9999.000000       0.100000       0.859000
53574     53574     shanxi         112.2850       39.5494           82       169     2012      08        18        231              0.165917      20.532379       1.642233       0.275374   -9999.000000   -9999.000000       0.116600   -9999.000000
53574     53574     shanxi         112.2850       39.5494           82       169     2012      08        19        232              0.160333      20.017059       3.441811       0.275855       0.182000       0.179700       0.104300       0.714000
53574     53574     shanxi         112.2850       39.5494           82       169     2012      08        20        233              0.155292      21.960449       0.297365       0.266577       0.181000       0.254800       0.153900       0.722000
53574     53574     shanxi         112.2850       39.5494           82       169     2012      08        21        234              0.149833      19.269623       0.000000       0.271737       0.151000       0.172000       0.135600       0.681000
53574     53574     shanxi         112.2850       39.5494           82       169     2012      08        22        235              0.144250      16.553040       0.000000       0.259181       0.142500       0.094200       0.133700   -9999.000000
53574     53574     shanxi         112.2850       39.5494           82       169     2012      08        23        236              0.138708      18.009308       0.000000       0.253006       0.146000       0.106100       0.130400   -9999.000000
53574     53574     shanxi         112.2850       39.5494           82       169     2012      08        24        237              0.132500      19.459076       0.000000       0.247934       0.135000   -9999.000000       0.138900       0.545000
53574     53574     shanxi         112.2850       39.5494           82       169     2012      08        25        238              0.000000      20.438354       1.123782       0.243381       0.164000       0.133200       0.120000       0.557000
53574     53574     shanxi         112.2850       39.5494           82       169     2012      08        26        239              0.121750      20.864746       0.614651       0.241424       0.137000       0.097400       0.134500       0.604000
53574     53574     shanxi         112.2850       39.5494           82       169     2012      08        27        240              0.118333      21.284882      12.255103       0.243122       0.172000       0.268000   -9999.000000       0.808000
53574     53574     shanxi         112.2850       39.5494           82       169     2012      08        28        241              0.114958      19.729156       1.980683       0.287587       0.134000   -9999.000000       0.104200       0.789000
53574     53574     shanxi         112.2850       39.5494           82       169     2012      08        29        242              0.110167      20.956512       0.000000       0.269730       0.143000   -9999.000000       0.109400       0.458000
53574     53574     shanxi         112.2850       39.5494           82       169     2012      08        30        243              0.106292      21.653931       0.000000       0.257299       0.154000   -9999.000000       0.095200       0.550000
53574     53574     shanxi         112.2850       39.5494           82       169     2012      08        31        244              0.104583      21.373749       1.060108       0.250558       0.158000       0.064500       0.097800       0.578000
53574     53574     shanxi         112.2850       39.5494           82       169     2012      09        01        245              0.153333      20.799408      30.838280       0.253298       0.193000   -9999.000000       0.120500       0.899000
53574     53574     shanxi         112.2850       39.5494           82       169     2012      09        02        246              0.182333      15.612183       0.000000       0.324593       0.192000   -9999.000000       0.127000       0.938000
53574     53574     shanxi         112.2850       39.5494           82       169     2012      09        03        247              0.171000      15.686737       0.620758       0.294607       0.177000   -9999.000000       0.121800       0.836000
53574     53574     shanxi         112.2850       39.5494           82       169     2012      09        04        248              0.160583      14.165588       0.000000       0.282740       0.168000   -9999.000000       0.138100       0.801000
53574     53574     shanxi         112.2850       39.5494           82       169     2012      09        05        249              0.151375      15.023621       0.000000       0.273910       0.166000   -9999.000000       0.118800       0.558000
53574     53574     shanxi         112.2850       39.5494           82       169     2012      09        06        250              0.146708      17.400848       1.879564       0.267832       0.184000   -9999.000000       0.133400   -9999.000000
53574     53574     shanxi         112.2850       39.5494           82       169     2012      09        07        251              0.141375      16.653259       0.000000       0.274263       0.145500   -9999.000000       0.131300       0.693000
53574     53574     shanxi         112.2850       39.5494           82       169     2012      09        08        252              0.134667      17.382172       0.000000       0.266194       0.138000   -9999.000000       0.121900       0.553000
53574     53574     shanxi         112.2850       39.5494           82       169     2012      09        09        253              0.127917      18.205048       0.000000       0.260202       0.144000   -9999.000000       0.123400       0.663000
53574     53574     shanxi         112.2850       39.5494           82       169     2012      09        10        254              0.123542      18.906555       0.504812       0.253996       0.161000   -9999.000000       0.101500       0.554000
53574     53574     shanxi         112.2850       39.5494           82       169     2012      09        11        255              0.120375      16.318329       0.075097       0.257189       0.140000   -9999.000000       0.081300   -9999.000000
53574     53574     shanxi         112.2850       39.5494           82       169     2012      09        12        256              0.117333      14.380829       0.071850       0.255479       0.123000   -9999.000000       0.086300       0.425000
53574     53574     shanxi         112.2850       39.5494           82       169     2012      09        13        257              0.115292      11.052216       1.350518       0.254492       0.131000       0.106400   -9999.000000       0.587000
53574     53574     shanxi         112.2850       39.5494           82       169     2012      09        14        258              0.113333      11.523529       0.974787       0.260026       0.124000   -9999.000000       0.081100       0.602000
53574     53574     shanxi         112.2850       39.5494           82       169     2012      09        15        259              0.111000      13.179199       0.439199       0.255003       0.134000   -9999.000000       0.093700       0.390000
53574     53574     shanxi         112.2850       39.5494           82       169     2012      09        16        260              0.110458      14.141998       1.454260       0.251322       0.130000       0.042500       0.080700   -9999.000000
53574     53574     shanxi         112.2850       39.5494           82       169     2012      09        17        261              0.108667      14.355286       0.632253       0.251162       0.122000   -9999.000000       0.074600       0.495000
53574     53574     shanxi         112.2850       39.5494           82       169     2012      09        18        262              0.108000      14.791626       0.076745       0.253616       0.133000       0.144900       0.083800       0.608000
53574     53574     shanxi         112.2850       39.5494           82       169     2012      09        19        263              0.106667      14.580566       0.484446       0.252473       0.110000   -9999.000000       0.077200       0.510000
53574     53574     shanxi         112.2850       39.5494           82       169     2012      09        20        264              0.105792      15.420746       2.976199       0.248402       0.108000   -9999.000000       0.082900       0.495000
53574     53574     shanxi         112.2850       39.5494           82       169     2012      09        21        265              0.104667      16.211578       1.961054       0.253499   -9999.000000       0.118000       0.087100   -9999.000000
53574     53574     shanxi         112.2850       39.5494           82       169     2012      09        22        266              0.104958      13.245697       0.000000       0.272488       0.128000       0.274200       0.086000       0.556000
53574     53574     shanxi         112.2850       39.5494           82       169     2012      09        23        267              0.104958      15.375366       0.185472       0.260228       0.110500       0.027800       0.084000       0.714000
53574     53574     shanxi         112.2850       39.5494           82       169     2012      09        24        268              0.104833      16.065033       8.022181       0.255105   -9999.000000   -9999.000000   -9999.000000       0.796000
53574     53574     shanxi         112.2850       39.5494           82       169     2012      09        25        269              0.106875      15.174561      10.720889       0.272442       0.156000       0.264900       0.100000       0.813000
53574     53574     shanxi         112.2850       39.5494           82       169     2012      09        26        270              0.110667      10.354492       0.111641       0.307670       0.165000       0.226200       0.115200       0.845000
53574     53574     shanxi         112.2850       39.5494           82       169     2012      09        27        271              0.112857      14.256134       0.065431       0.282730   -9999.000000   -9999.000000       0.098200       0.643000
53574     53574     shanxi         112.2850       39.5494           82       169     2012      09        28        272              0.113400       9.511078       0.000000       0.274945       0.121000   -9999.000000       0.091600       0.500000
53574     53574     shanxi         112.2850       39.5494           82       169     2012      09        29        273              0.114000       9.489807       1.696950       0.269982       0.116000   -9999.000000       0.097400       0.480000
53574     53574     shanxi         112.2850       39.5494           82       169     2012      09        30        274              0.114333      10.294800       0.215405       0.265878       0.109000   -9999.000000       0.095400       0.283000
53574     53574     shanxi         112.2850       39.5494           82       169     2012      10        01        275              0.114208      10.900208       0.507955       0.262709       0.107000       0.139700       0.067400       0.371000
53574     53574     shanxi         112.2850       39.5494           82       169     2012      10        02        276              0.113875      12.216248       0.536763       0.260899       0.113000       0.101600       0.078500       0.466000
53574     53574     shanxi         112.2850       39.5494           82       169     2012      10        03        277              0.113750      12.829437       0.267465       0.259839       0.100500   -9999.000000       0.067600       0.500000
53574     53574     shanxi         112.2850       39.5494           82       169     2012      10        04        278              0.113000      12.039520      14.340189       0.257966   -9999.000000   -9999.000000       0.091500       0.832000
53574     53574     shanxi         112.2850       39.5494           82       169     2012      10        05        279              0.113000       8.176117       8.495646       0.300642       0.137000   -9999.000000       0.098300   -9999.000000
53574     53574     shanxi         112.2850       39.5494           82       169     2012      10        06        280              0.113000       8.859741       1.986696       0.303097       0.123000       0.223600       0.083800       0.649000
53574     53574     shanxi         112.2850       39.5494           82       169     2012      10        07        281              0.113000      11.139435       1.571166       0.291097       0.124000   -9999.000000       0.076100       0.494000
53574     53574     shanxi         112.2850       39.5494           82       169     2012      10        08        282              0.113000      10.896149       3.336864       0.286979       0.129000       0.246300       0.085800       0.544000
53574     53574     shanxi         112.2850       39.5494           82       169     2012      10        09        283              0.113083      11.999054       0.136797       0.283679       0.121000       0.041400       0.074200       0.587000
53574     53574     shanxi         112.2850       39.5494           82       169     2012      10        10        284              0.112917       7.323578       0.148822       0.280897       0.121000   -9999.000000       0.078600   -9999.000000
53574     53574     shanxi         112.2850       39.5494           82       169     2012      10        11        285              0.112750       8.359375       0.000000       0.274433       0.094000       0.175400   -9999.000000       0.447000
53574     53574     shanxi         112.2850       39.5494           82       169     2012      10        12        286              0.112667      10.002747       0.000000       0.269358   -9999.000000   -9999.000000       0.066200       0.454000
53574     53574     shanxi         112.2850       39.5494           82       169     2012      10        13        287              0.110042       9.744690       0.000000       0.265524       0.104000   -9999.000000       0.076200       0.385000
53574     53574     shanxi         112.2850       39.5494           82       169     2012      10        14        288              0.109583       8.627869       0.000000       0.263312       0.096000       0.195100       0.062400       0.368000
53574     53574     shanxi         112.2850       39.5494           82       169     2012      10        15        289              0.110125       9.464844       1.710569       0.262968       0.104000   -9999.000000       0.070900   -9999.000000
53574     53574     shanxi         112.2850       39.5494           82       169     2012      10        16        290              0.112500       8.579712       0.564506       0.268234       0.151000   -9999.000000       0.113900       0.846000
53574     53574     shanxi         112.2850       39.5494           82       169     2012      10        17        291              0.114167       4.007416       0.000000       0.247948       0.132000   -9999.000000       0.083500       0.538000
53574     53574     shanxi         112.2850       39.5494           82       169     2012      10        18        292              0.115542       4.242706       0.000000       0.252361   -9999.000000       0.429300       0.069900       0.699000
53574     53574     shanxi         112.2850       39.5494           82       169     2012      10        19        293              0.117167       5.219513       0.000000       0.258919   -9999.000000       0.148800       0.088000       0.554000
53574     53574     shanxi         112.2850       39.5494           82       169     2012      10        20        294              0.117833       7.693573       0.252190       0.260212       0.108000   -9999.000000       0.074600   -9999.000000
53574     53574     shanxi         112.2850       39.5494           82       169     2012      10        21        295              0.120083      10.252014       0.945440       0.259665   -9999.000000   -9999.000000       0.091000       0.761000
53574     53574     shanxi         112.2850       39.5494           82       169     2012      10        22        296              0.125375       3.729248       0.352925       0.258990   -9999.000000   -9999.000000       0.101400       0.742000
53574     53574     shanxi         112.2850       39.5494           82       169     2012      10        23        297              0.127917       4.949738       0.000000       0.261635   -9999.000000   -9999.000000       0.075500       0.629000
53574     53574     shanxi         112.2850       39.5494           82       169     2012      10        24        298              0.128875       6.551880       0.000000       0.260965   -9999.000000       0.140900       0.069200       0.583000
53574     53574     shanxi         112.2850       39.5494           82       169     2012      10        25        299              0.000000       6.765350       0.000000       0.257995       0.102000   -9999.000000       0.076300       0.533000
53574     53574     shanxi         112.2850       39.5494           82       169     2012      10        26        300              0.126000       7.883636       0.301996       0.257843       0.095000   -9999.000000       0.067300       0.545000
53574     53574     shanxi         112.2850       39.5494           82       169     2012      10        27        301              0.126500       6.437500       0.000000       0.259950       0.108000   -9999.000000       0.076300       0.573000
53574     53574     shanxi         112.2850       39.5494           82       169     2012      10        28        302              0.000000       5.518951       0.000000       0.254792       0.102500   -9999.000000   -9999.000000       0.606000
53574     53574     shanxi         112.2850       39.5494           82       169     2012      10        29        303              0.125667       8.018768       0.144538       0.258625   -9999.000000       0.196500       0.052200   -9999.000000
53574     53574     shanxi         112.2850       39.5494           82       169     2012      10        30        304              0.124500       3.818024       0.000000       0.220888       0.092000   -9999.000000       0.059500       0.210000
53574     53574     shanxi         112.2850       39.5494           82       169     2012      10        31        305              0.123667       1.725922       0.000000       0.211405       0.085000   -9999.000000       0.055600       0.212000
53574     53574     shanxi         112.2850       39.5494           82       169     2012      11        01        306              0.123417       2.755585       0.000000       0.227208       0.088000       0.078500       0.057100       0.342000
53574     53574     shanxi         112.2850       39.5494           82       169     2012      11        02        307              0.123000       3.980286       0.034111       0.246458       0.085000   -9999.000000       0.063400       0.428000
53574     53574     shanxi         112.2850       39.5494           82       169     2012      11        03        308              0.122833       6.337311       0.000000       0.250548   -9999.000000   -9999.000000       0.053400   -9999.000000
53574     53574     shanxi         112.2850       39.5494           82       169     2012      11        04        309              0.120167      -2.468964       0.000000       0.163608   -9999.000000   -9999.000000       0.044700       0.246000
53574     53574     shanxi         112.2850       39.5494           82       169     2012      11        05        310              0.119250      -4.608734       0.396584       0.109478       0.101000       0.064800       0.045400       0.355000
53574     53574     shanxi         112.2850       39.5494           82       169     2012      11        06        311              0.119500      -0.991394       0.796638       0.159591       0.110000       0.052300       0.057000       0.481000
53574     53574     shanxi         112.2850       39.5494           82       169     2012      11        07        312              0.119750       0.750366       0.000000       0.183692   -9999.000000       0.103500       0.056200       0.381000
53574     53574     shanxi         112.2850       39.5494           82       169     2012      11        08        313              0.118917       0.045593       0.000000       0.176475   -9999.000000   -9999.000000   -9999.000000   -9999.000000
53574     53574     shanxi         112.2850       39.5494           82       169     2012      11        09        314              0.119250       1.348572       0.468977       0.195396   -9999.000000       0.037900       0.058000       0.364000
53574     53574     shanxi         112.2850       39.5494           82       169     2012      11        10        315              0.119583       1.798981       0.000000       0.217861   -9999.000000       0.235000       0.051200       0.376000
53574     53574     shanxi         112.2850       39.5494           82       169     2012      11        11        316              0.112083      -3.522003       0.000000       0.132029   -9999.000000   -9999.000000       0.035200       0.252000
53574     53574     shanxi         112.2850       39.5494           82       169     2012      11        12        317              0.102083      -5.627472       0.000000       0.106391   -9999.000000   -9999.000000       0.039900       0.374000
53574     53574     shanxi         112.2850       39.5494           82       169     2012      11        13        318              0.000000      -4.269104       0.000000       0.120311   -9999.000000   -9999.000000       0.040500   -9999.000000
53574     53574     shanxi         112.2850       39.5494           82       169     2012      11        14        319              0.092667      -5.494781       0.000000       0.109634   -9999.000000   -9999.000000   -9999.000000       0.265000
53574     53574     shanxi         112.2850       39.5494           82       169     2012      11        15        320              0.092583      -2.180817       0.257972       0.143867   -9999.000000   -9999.000000       0.039100       0.275000
53574     53574     shanxi         112.2850       39.5494           82       169     2012      11        16        321              0.092333      -1.887726       0.000000       0.141509   -9999.000000   -9999.000000       0.039200       0.191000
53574     53574     shanxi         112.2850       39.5494           82       169     2012      11        17        322              0.000000      -3.533508       0.000000       0.119721   -9999.000000   -9999.000000       0.044900       0.400000
53574     53574     shanxi         112.2850       39.5494           82       169     2012      11        18        323              0.093292      -0.430145       0.000000       0.162120   -9999.000000   -9999.000000       0.042600   -9999.000000
53574     53574     shanxi         112.2850       39.5494           82       169     2012      11        19        324              0.091583      -2.349304       0.000000       0.149348   -9999.000000       0.054000       0.041300       0.290000
53574     53574     shanxi         112.2850       39.5494           82       169     2012      11        20        325              0.092125      -1.967407       0.000000       0.146625   -9999.000000   -9999.000000       0.046500       0.299000
53574     53574     shanxi         112.2850       39.5494           82       169     2012      11        21        326              0.094708       0.023346       0.000000       0.169221       0.100000   -9999.000000       0.038300       0.378000
53574     53574     shanxi         112.2850       39.5494           82       169     2012      11        22        327              0.094458       0.720764       0.000000       0.187043   -9999.000000   -9999.000000       0.036300       0.322000
53574     53574     shanxi         112.2850       39.5494           82       169     2012      11        23        328              0.089750      -4.074677       0.000000       0.124303   -9999.000000       0.185700       0.036600       0.331000
53574     53574     shanxi         112.2850       39.5494           82       169     2012      11        24        329              0.088833      -5.505829       0.000000       0.105717   -9999.000000       0.063300       0.041400       0.333000
53574     53574     shanxi         112.2850       39.5494           82       169     2012      11        25        330              0.089083      -2.289703       0.000000       0.130403   -9999.000000   -9999.000000   -9999.000000       0.463000
53574     53574     shanxi         112.2850       39.5494           82       169     2012      11        26        331              0.088417      -5.369080       0.000000       0.112569   -9999.000000   -9999.000000   -9999.000000       0.326000
53574     53574     shanxi         112.2850       39.5494           82       169     2012      11        27        332              0.088500      -4.397308       0.000000       0.108336   -9999.000000   -9999.000000       0.038000   -9999.000000
53574     53574     shanxi         112.2850       39.5494           82       169     2012      11        28        333              0.087500      -4.677490       0.000000       0.120414   -9999.000000       0.261900       0.033900       0.193000
53574     53574     shanxi         112.2850       39.5494           82       169     2012      11        29        334              0.086667      -7.453796       0.000000       0.101575   -9999.000000       0.049800       0.037900       0.160000
53574     53574     shanxi         112.2850       39.5494           82       169     2012      11        30        335              0.086250      -7.004028       0.000000       0.103830   -9999.000000   -9999.000000       0.036900       0.087000
53574     53574     shanxi         112.2850       39.5494           82       169     2012      12        01        336              0.086583      -5.679688       0.000000       0.107595   -9999.000000   -9999.000000       0.038000       0.190000
53574     53574     shanxi         112.2850       39.5494           82       169     2012      12        02        337              0.086833      -4.753235       0.000000       0.109117   -9999.000000   -9999.000000       0.034000   -9999.000000
53574     53574     shanxi         112.2850       39.5494           82       169     2012      12        03        338              0.086167      -5.183197       0.000000       0.115130   -9999.000000   -9999.000000       0.041200       0.035000
53574     53574     shanxi         112.2850       39.5494           82       169     2012      12        04        339              0.086000      -8.091156       0.000000       0.100440   -9999.000000   -9999.000000       0.036700       0.015000
53574     53574     shanxi         112.2850       39.5494           82       169     2012      12        05        340              0.086000      -7.703308       0.000000       0.100458   -9999.000000   -9999.000000       0.034600       0.033000
53574     53574     shanxi         112.2850       39.5494           82       169     2012      12        06        341              0.086000     -10.744537       0.000000       0.098285   -9999.000000   -9999.000000       0.034800       0.148000
53574     53574     shanxi         112.2850       39.5494           82       169     2012      12        07        342              0.086000      -9.088593       0.000000       0.098581   -9999.000000   -9999.000000       0.038100   -9999.000000
53574     53574     shanxi         112.2850       39.5494           82       169     2012      12        08        343              0.086000     -12.535370       0.000000       0.096581   -9999.000000   -9999.000000       0.036000       0.024000
53574     53574     shanxi         112.2850       39.5494           82       169     2012      12        09        344              0.086000     -15.129944       0.000000       0.093334   -9999.000000   -9999.000000       0.038200       0.077000
53574     53574     shanxi         112.2850       39.5494           82       169     2012      12        10        345              0.086000     -10.071808       0.000000       0.094275   -9999.000000   -9999.000000       0.031400       0.011000
53574     53574     shanxi         112.2850       39.5494           82       169     2012      12        11        346              0.086000      -9.511108       0.000000       0.095068   -9999.000000   -9999.000000       0.031100       0.417000
53574     53574     shanxi         112.2850       39.5494           82       169     2012      12        12        347              0.086000      -8.233063       0.000000       0.095257   -9999.000000   -9999.000000   -9999.000000   -9999.000000
53574     53574     shanxi         112.2850       39.5494           82       169     2012      12        13        348              0.086000      -6.705231       0.000000       0.103996   -9999.000000   -9999.000000       0.032900       0.159000
53574     53574     shanxi         112.2850       39.5494           82       169     2012      12        14        349              0.086000      -6.074310       0.000000       0.100580   -9999.000000   -9999.000000       0.030900       0.080000
53574     53574     shanxi         112.2850       39.5494           82       169     2012      12        15        350              0.000000      -4.624634       0.000000       0.103237   -9999.000000   -9999.000000       0.031100       0.085000
53574     53574     shanxi         112.2850       39.5494           82       169     2012      12        16        351              0.087250      -3.826263       0.000000       0.115362   -9999.000000   -9999.000000       0.033300       0.195000
53574     53574     shanxi         112.2850       39.5494           82       169     2012      12        17        352              0.086000      -5.278473       0.000000       0.108381   -9999.000000       0.048600       0.028300   -9999.000000
53574     53574     shanxi         112.2850       39.5494           82       169     2012      12        18        353              0.086000     -10.728058       0.000000       0.096923   -9999.000000   -9999.000000       0.027800       0.078000
53574     53574     shanxi         112.2850       39.5494           82       169     2012      12        19        354              0.086000      -8.992859       0.000000       0.095544   -9999.000000   -9999.000000       0.030200       0.304000
53574     53574     shanxi         112.2850       39.5494           82       169     2012      12        20        355              0.000000      -7.103973       0.000000       0.100716   -9999.000000   -9999.000000       0.026200       0.076000
53574     53574     shanxi         112.2850       39.5494           82       169     2012      12        21        356              0.086000      -7.352112       0.302753       0.097656   -9999.000000   -9999.000000       0.026600       0.149000
53574     53574     shanxi         112.2850       39.5494           82       169     2012      12        22        357              0.086000     -10.632935       0.000000       0.096512   -9999.000000   -9999.000000       0.028800       0.082000
53574     53574     shanxi         112.2850       39.5494           82       169     2012      12        23        358              0.085833     -17.005463       0.000000       0.093054   -9999.000000   -9999.000000   -9999.000000       0.121000
53574     53574     shanxi         112.2850       39.5494           82       169     2012      12        24        359              0.085714     -17.457428       0.000000       0.090182   -9999.000000   -9999.000000       0.031400       0.083000
53574     53574     shanxi         112.2850       39.5494           82       169     2012      12        25        360              0.085792     -16.464172       0.000000       0.090502   -9999.000000   -9999.000000       0.026200       0.136000
53574     53574     shanxi         112.2850       39.5494           82       169     2012      12        26        361              0.000000     -13.370361       0.000000       0.091017   -9999.000000   -9999.000000       0.031400   -9999.000000
53574     53574     shanxi         112.2850       39.5494           82       169     2012      12        27        362              0.086000     -10.237488       0.000000       0.091950   -9999.000000   -9999.000000       0.028300       0.023000
53574     53574     shanxi         112.2850       39.5494           82       169     2012      12        28        363              0.086000      -7.886993       0.204498       0.094829   -9999.000000   -9999.000000       0.024300       0.113000
53574     53574     shanxi         112.2850       39.5494           82       169     2012      12        29        364              0.000000     -11.246002       0.153558       0.092583   -9999.000000   -9999.000000   -9999.000000       0.030000
53574     53574     shanxi         112.2850       39.5494           82       169     2012      12        30        365              0.000000     -15.101929       0.000000       0.091299   -9999.000000   -9999.000000       0.027500       0.262000
53574     53574     shanxi         112.2850       39.5494           82       169     2012      12        31        366              0.086000     -13.039673       0.000000       0.091626   -9999.000000   -9999.000000       0.025900   -9999.000000
