# Supplementary material for: Research on Fusing Multisatellite Soil Moisture Data Based on Bayesian Model Averaging
Source: Hindawi journal article supplement (doi:10.1155/2018/9310838), 2018-06-25
Supplement: f1 [file 9310838.f1.zip › 2012_sm00-10cm_daily_ZDB_ZHY_53578_366days_allin.txt]

53578     53578     shanxi         112.4333       39.3667           83       170     2012      01        01        001              0.000000   -9999.000000       0.000000   -9999.000000   -9999.000000   -9999.000000       0.021800   -9999.000000
53578     53578     shanxi         112.4333       39.3667           83       170     2012      01        02        002              0.018875      -5.987823       0.000000       0.121974   -9999.000000   -9999.000000       0.032600       0.137000
53578     53578     shanxi         112.4333       39.3667           83       170     2012      01        03        003              0.000000      -8.956665       0.000000       0.114661   -9999.000000   -9999.000000   -9999.000000       0.105000
53578     53578     shanxi         112.4333       39.3667           83       170     2012      01        04        004              0.015250     -11.373291       0.000000       0.111766   -9999.000000   -9999.000000       0.027500   -9999.000000
53578     53578     shanxi         112.4333       39.3667           83       170     2012      01        05        005              0.015458     -10.685242       0.000000       0.109969   -9999.000000   -9999.000000       0.034300       0.549000
53578     53578     shanxi         112.4333       39.3667           83       170     2012      01        06        006              0.015958      -9.495209       0.000000       0.112676   -9999.000000   -9999.000000       0.027300       0.413000
53578     53578     shanxi         112.4333       39.3667           83       170     2012      01        07        007              0.017458      -8.755249       0.000000       0.111200   -9999.000000   -9999.000000       0.030600       0.527000
53578     53578     shanxi         112.4333       39.3667           83       170     2012      01        08        008              0.000000      -6.575378       0.000000       0.120752   -9999.000000   -9999.000000       0.032000       0.064000
53578     53578     shanxi         112.4333       39.3667           83       170     2012      01        09        009              0.017417      -6.935211       0.000000       0.123355   -9999.000000   -9999.000000   -9999.000000       0.372000
53578     53578     shanxi         112.4333       39.3667           83       170     2012      01        10        010              0.016609      -7.122589       0.000000       0.124132   -9999.000000   -9999.000000       0.028100       0.301000
53578     53578     shanxi         112.4333       39.3667           83       170     2012      01        11        011              0.015958      -8.692291       0.332070       0.118316   -9999.000000   -9999.000000       0.039100       0.404000
53578     53578     shanxi         112.4333       39.3667           83       170     2012      01        12        012              0.016667      -8.930115       0.000000       0.113968   -9999.000000   -9999.000000       0.025700       0.498000
53578     53578     shanxi         112.4333       39.3667           83       170     2012      01        13        013              0.017375      -7.429779       0.954536       0.122752   -9999.000000   -9999.000000       0.035100       0.127000
53578     53578     shanxi         112.4333       39.3667           83       170     2012      01        14        014              0.018375      -6.734467       0.000000       0.127340   -9999.000000   -9999.000000       0.038700       0.397000
53578     53578     shanxi         112.4333       39.3667           83       170     2012      01        15        015              0.018875      -6.166779       0.000000       0.127975   -9999.000000   -9999.000000       0.035100       0.211000
53578     53578     shanxi         112.4333       39.3667           83       170     2012      01        16        016              0.018542      -5.931122       0.398670       0.134605   -9999.000000   -9999.000000       0.035600       0.555000
53578     53578     shanxi         112.4333       39.3667           83       170     2012      01        17        017              0.000000      -5.386261       0.000000       0.130343   -9999.000000   -9999.000000       0.037200       0.376000
53578     53578     shanxi         112.4333       39.3667           83       170     2012      01        18        018              0.018083      -5.886047       0.000000       0.137933   -9999.000000   -9999.000000       0.026400   -9999.000000
53578     53578     shanxi         112.4333       39.3667           83       170     2012      01        19        019              0.021917      -5.771240       0.333186       0.131187   -9999.000000   -9999.000000       0.036000       0.512000
53578     53578     shanxi         112.4333       39.3667           83       170     2012      01        20        020              0.022000      -4.376556       0.000000       0.138116   -9999.000000   -9999.000000   -9999.000000       0.177000
53578     53578     shanxi         112.4333       39.3667           83       170     2012      01        21        021              0.020708     -10.769409       0.671113       0.115650   -9999.000000   -9999.000000       0.020000       0.617000
53578     53578     shanxi         112.4333       39.3667           83       170     2012      01        22        022              0.018042     -15.658661       0.000000       0.109129   -9999.000000   -9999.000000       0.028800       0.200000
53578     53578     shanxi         112.4333       39.3667           83       170     2012      01        23        023              0.017125     -15.101898       0.000000       0.106603   -9999.000000   -9999.000000       0.023100   -9999.000000
53578     53578     shanxi         112.4333       39.3667           83       170     2012      01        24        024              0.016708     -14.270416       0.000000       0.106913   -9999.000000   -9999.000000   -9999.000000       0.592000
53578     53578     shanxi         112.4333       39.3667           83       170     2012      01        25        025              0.016792     -13.260437       0.000000       0.107353   -9999.000000   -9999.000000       0.026900       0.285000
53578     53578     shanxi         112.4333       39.3667           83       170     2012      01        26        026              0.017125     -10.392456       0.000000       0.108262   -9999.000000   -9999.000000       0.030700       0.601000
53578     53578     shanxi         112.4333       39.3667           83       170     2012      01        27        027              0.017917      -8.222900       0.000000       0.114456   -9999.000000   -9999.000000       0.028700       0.322000
53578     53578     shanxi         112.4333       39.3667           83       170     2012      01        28        028              0.018042      -6.250580       0.000000       0.128607   -9999.000000   -9999.000000       0.031500   -9999.000000
53578     53578     shanxi         112.4333       39.3667           83       170     2012      01        29        029              0.017417      -7.405487       0.000000       0.126834   -9999.000000   -9999.000000       0.024300       0.728000
53578     53578     shanxi         112.4333       39.3667           83       170     2012      01        30        030              0.018458      -7.930878       0.131871       0.119017   -9999.000000   -9999.000000       0.034800       0.310000
53578     53578     shanxi         112.4333       39.3667           83       170     2012      01        31        031              0.018250      -5.245331       0.174590       0.131779   -9999.000000   -9999.000000   -9999.000000       0.525000
53578     53578     shanxi         112.4333       39.3667           83       170     2012      02        01        032              0.015667      -7.607208       0.000000       0.127793   -9999.000000   -9999.000000       0.031800       0.238000
53578     53578     shanxi         112.4333       39.3667           83       170     2012      02        02        033              0.015208     -11.072968       0.000000       0.110937   -9999.000000   -9999.000000       0.036200   -9999.000000
53578     53578     shanxi         112.4333       39.3667           83       170     2012      02        03        034              0.016500      -9.757111       0.000000       0.111515   -9999.000000   -9999.000000       0.021300       0.277000
53578     53578     shanxi         112.4333       39.3667           83       170     2012      02        04        035              0.016625      -8.241150       0.337849       0.121964   -9999.000000   -9999.000000       0.029200       0.335000
53578     53578     shanxi         112.4333       39.3667           83       170     2012      02        05        036              0.021125      -6.557434       0.000000       0.122311   -9999.000000   -9999.000000       0.032900       0.154000
53578     53578     shanxi         112.4333       39.3667           83       170     2012      02        06        037              0.017583      -4.598083       0.000000       0.140970   -9999.000000   -9999.000000   -9999.000000       0.131000
53578     53578     shanxi         112.4333       39.3667           83       170     2012      02        07        038              0.015750     -10.646637       0.000000       0.114193   -9999.000000   -9999.000000       0.028800       0.442000
53578     53578     shanxi         112.4333       39.3667           83       170     2012      02        08        039              0.015917     -10.580841       0.000000       0.110795   -9999.000000   -9999.000000       0.039700       0.258000
53578     53578     shanxi         112.4333       39.3667           83       170     2012      02        09        040              0.015458      -9.369324       0.346414       0.112142   -9999.000000   -9999.000000       0.030700       0.637000
53578     53578     shanxi         112.4333       39.3667           83       170     2012      02        10        041              0.017042      -9.384064       0.000000       0.113241   -9999.000000   -9999.000000       0.030100       0.291000
53578     53578     shanxi         112.4333       39.3667           83       170     2012      02        11        042              0.018583      -7.252777       0.000000       0.125563   -9999.000000   -9999.000000       0.034300       0.410000
53578     53578     shanxi         112.4333       39.3667           83       170     2012      02        12        043              0.017917      -5.180969       0.000000       0.142467   -9999.000000   -9999.000000   -9999.000000       0.238000
53578     53578     shanxi         112.4333       39.3667           83       170     2012      02        13        044              0.023667      -5.145721       0.151277       0.130977   -9999.000000   -9999.000000   -9999.000000       0.213000
53578     53578     shanxi         112.4333       39.3667           83       170     2012      02        14        045              0.023500      -1.352539       0.000000       0.172749   -9999.000000   -9999.000000       0.041600       0.463000
53578     53578     shanxi         112.4333       39.3667           83       170     2012      02        15        046              0.021167      -3.496613       0.000000       0.158994   -9999.000000   -9999.000000       0.030900       0.237000
53578     53578     shanxi         112.4333       39.3667           83       170     2012      02        16        047              0.018958      -5.196899       0.000000       0.146965   -9999.000000   -9999.000000       0.036700   -9999.000000
53578     53578     shanxi         112.4333       39.3667           83       170     2012      02        17        048              0.018250      -7.540619       0.000000       0.124769   -9999.000000   -9999.000000   -9999.000000       0.625000
53578     53578     shanxi         112.4333       39.3667           83       170     2012      02        18        049              0.017833      -8.159790       0.000000       0.121096   -9999.000000   -9999.000000       0.032700       0.610000
53578     53578     shanxi         112.4333       39.3667           83       170     2012      02        19        050              0.019875      -7.557678       0.286363       0.128883   -9999.000000   -9999.000000       0.041400       0.551000
53578     53578     shanxi         112.4333       39.3667           83       170     2012      02        20        051              0.023458      -4.130402       0.644406       0.151461       0.079000   -9999.000000       0.030300       0.782000
53578     53578     shanxi         112.4333       39.3667           83       170     2012      02        21        052              0.029042      -1.164917       0.000000       0.174680   -9999.000000       0.076200   -9999.000000   -9999.000000
53578     53578     shanxi         112.4333       39.3667           83       170     2012      02        22        053              0.036208       2.010406       0.000000       0.199303   -9999.000000   -9999.000000       0.042100       0.956000
53578     53578     shanxi         112.4333       39.3667           83       170     2012      02        23        054              0.036750       0.743378       0.653139       0.190527       0.064000   -9999.000000   -9999.000000       0.371000
53578     53578     shanxi         112.4333       39.3667           83       170     2012      02        24        055              0.035917       0.492279       0.000000       0.184768   -9999.000000   -9999.000000       0.024500       0.586000
53578     53578     shanxi         112.4333       39.3667           83       170     2012      02        25        056              0.027417      -2.422424       0.000000       0.167626   -9999.000000   -9999.000000       0.040300       0.252000
53578     53578     shanxi         112.4333       39.3667           83       170     2012      02        26        057              0.028125      -5.491913       0.000000       0.128720   -9999.000000   -9999.000000       0.035300   -9999.000000
53578     53578     shanxi         112.4333       39.3667           83       170     2012      02        27        058              0.031375      -2.693085       0.655675       0.162688   -9999.000000   -9999.000000   -9999.000000       0.578000
53578     53578     shanxi         112.4333       39.3667           83       170     2012      02        28        059              0.035167      -0.534912       0.654638       0.178941       0.068000       0.049900       0.044000       0.383000
53578     53578     shanxi         112.4333       39.3667           83       170     2012      02        29        060              0.000000   -9999.000000       0.000000   -9999.000000       0.072000   -9999.000000   -9999.000000   -9999.000000
53578     53578     shanxi         112.4333       39.3667           83       170     2012      03        01        061              0.043417       0.908569       0.000000       0.190498   -9999.000000   -9999.000000       0.033700       0.310000
53578     53578     shanxi         112.4333       39.3667           83       170     2012      03        02        062              0.046667      -0.258575       0.623171       0.179389       0.089000   -9999.000000       0.043800   -9999.000000
53578     53578     shanxi         112.4333       39.3667           83       170     2012      03        03        063              0.050917       1.053650       0.000000       0.194701   -9999.000000   -9999.000000       0.037300       0.706000
53578     53578     shanxi         112.4333       39.3667           83       170     2012      03        04        064              0.055792       0.390228       0.000000       0.189368       0.075000   -9999.000000       0.044000       0.728000
53578     53578     shanxi         112.4333       39.3667           83       170     2012      03        05        065              0.074250       1.599060       0.000000       0.200521   -9999.000000   -9999.000000   -9999.000000       0.621000
53578     53578     shanxi         112.4333       39.3667           83       170     2012      03        06        066              0.060292      -1.302490       0.615536       0.177513       0.086000   -9999.000000       0.033300       0.092000
53578     53578     shanxi         112.4333       39.3667           83       170     2012      03        07        067              0.000000      -0.820618       0.000000       0.174977       0.088000   -9999.000000       0.042800       0.617000
53578     53578     shanxi         112.4333       39.3667           83       170     2012      03        08        068              0.049083      -0.499207       0.000000       0.177951   -9999.000000   -9999.000000       0.033100       0.304000
53578     53578     shanxi         112.4333       39.3667           83       170     2012      03        09        069              0.054417      -1.821991       0.000000       0.167091   -9999.000000   -9999.000000       0.042100       0.479000
53578     53578     shanxi         112.4333       39.3667           83       170     2012      03        10        070              0.063292       1.006744       0.000000       0.189840       0.068000       0.073900       0.043800       0.393000
53578     53578     shanxi         112.4333       39.3667           83       170     2012      03        11        071              0.046708      -1.796661       0.000000       0.171512       0.077000   -9999.000000       0.042100       0.386000
53578     53578     shanxi         112.4333       39.3667           83       170     2012      03        12        072              0.051417      -1.730621       0.000000       0.165513       0.086000       0.054300       0.025300       0.630000
53578     53578     shanxi         112.4333       39.3667           83       170     2012      03        13        073              0.066625       0.748016       0.000000       0.182392   -9999.000000   -9999.000000       0.041700       0.278000
53578     53578     shanxi         112.4333       39.3667           83       170     2012      03        14        074              0.077391       2.065399       0.283797       0.191056   -9999.000000   -9999.000000   -9999.000000       0.406000
53578     53578     shanxi         112.4333       39.3667           83       170     2012      03        15        075              0.069750       3.457520       0.573795       0.199633   -9999.000000       0.025700       0.050800       0.516000
53578     53578     shanxi         112.4333       39.3667           83       170     2012      03        16        076              0.103625       2.730774       0.000000       0.217028       0.089000   -9999.000000       0.050000   -9999.000000
53578     53578     shanxi         112.4333       39.3667           83       170     2012      03        17        077              0.106875       5.648254       0.613627       0.216909       0.089000       0.034600       0.042500       0.681000
53578     53578     shanxi         112.4333       39.3667           83       170     2012      03        18        078              0.104667       5.908417       0.556295       0.218034   -9999.000000   -9999.000000       0.037500       0.617000
53578     53578     shanxi         112.4333       39.3667           83       170     2012      03        19        079              0.104583       2.786163       0.000000       0.205402   -9999.000000   -9999.000000       0.046900       0.676000
53578     53578     shanxi         112.4333       39.3667           83       170     2012      03        20        080              0.103000       3.430054       0.139618       0.215428       0.075000       0.027000       0.052000       0.430000
53578     53578     shanxi         112.4333       39.3667           83       170     2012      03        21        081              0.097042       4.470032       0.101643       0.217639   -9999.000000   -9999.000000       0.065800   -9999.000000
53578     53578     shanxi         112.4333       39.3667           83       170     2012      03        22        082              0.103333       2.457275       1.744048       0.217833   -9999.000000   -9999.000000   -9999.000000       0.962000
53578     53578     shanxi         112.4333       39.3667           83       170     2012      03        23        083              0.106417       3.281494       0.174175       0.223992   -9999.000000   -9999.000000       0.035500       0.512000
53578     53578     shanxi         112.4333       39.3667           83       170     2012      03        24        084              0.106208       2.682343       0.316966       0.210775   -9999.000000   -9999.000000   -9999.000000       0.776000
53578     53578     shanxi         112.4333       39.3667           83       170     2012      03        25        085              0.000000       5.662933       1.469700       0.216385       0.084000   -9999.000000       0.048400       0.466000
53578     53578     shanxi         112.4333       39.3667           83       170     2012      03        26        086              0.108625       7.110199       0.279448       0.219839       0.079000   -9999.000000       0.054400   -9999.000000
53578     53578     shanxi         112.4333       39.3667           83       170     2012      03        27        087              0.110792       8.606201       0.729737       0.224014       0.084000   -9999.000000       0.058600       0.884000
53578     53578     shanxi         112.4333       39.3667           83       170     2012      03        28        088              0.111208       9.393768       0.292015       0.216976       0.092000       0.035500       0.071800       0.519000
53578     53578     shanxi         112.4333       39.3667           83       170     2012      03        29        089              0.110875      11.489166       0.000000       0.221199   -9999.000000   -9999.000000       0.032800       0.731000
53578     53578     shanxi         112.4333       39.3667           83       170     2012      03        30        090              0.107000       9.087219       0.131393       0.211036   -9999.000000       0.069900       0.050600       0.580000
53578     53578     shanxi         112.4333       39.3667           83       170     2012      03        31        091              0.106917       5.224121       0.300056       0.214528       0.072000   -9999.000000       0.048400   -9999.000000
53578     53578     shanxi         112.4333       39.3667           83       170     2012      04        01        092              0.106417       8.618683       0.000000       0.213308       0.081000   -9999.000000       0.056200       0.847000
53578     53578     shanxi         112.4333       39.3667           83       170     2012      04        02        093              0.103250      10.071198       0.532881       0.214036       0.093000       0.054700       0.057000       0.514000
53578     53578     shanxi         112.4333       39.3667           83       170     2012      04        03        094              0.101583       4.209412       0.547753       0.195155   -9999.000000   -9999.000000       0.046100       0.443000
53578     53578     shanxi         112.4333       39.3667           83       170     2012      04        04        095              0.102917       7.476837       0.311317       0.208076   -9999.000000       0.033000       0.042300       0.474000
53578     53578     shanxi         112.4333       39.3667           83       170     2012      04        05        096              0.103042       9.464691       0.000000       0.206939       0.065000   -9999.000000       0.052400       0.509000
53578     53578     shanxi         112.4333       39.3667           83       170     2012      04        06        097              0.102958       9.724701       0.000000       0.206471       0.076000   -9999.000000       0.044300       0.575000
53578     53578     shanxi         112.4333       39.3667           83       170     2012      04        07        098              0.103708      11.497192       0.000000       0.201266       0.076000       0.066200       0.049800       0.476000
53578     53578     shanxi         112.4333       39.3667           83       170     2012      04        08        099              0.103833      12.938812       0.000000       0.195459       0.070000   -9999.000000   -9999.000000       0.466000
53578     53578     shanxi         112.4333       39.3667           83       170     2012      04        09        100              0.103708      13.556641       0.310861       0.190111       0.074000       0.057200       0.041800       0.347000
53578     53578     shanxi         112.4333       39.3667           83       170     2012      04        10        101              0.102375      15.053986       0.654180       0.191080       0.076000   -9999.000000       0.050900       0.571000
53578     53578     shanxi         112.4333       39.3667           83       170     2012      04        11        102              0.098667      12.260071       0.307033       0.192093       0.063000   -9999.000000       0.059700       0.626000
53578     53578     shanxi         112.4333       39.3667           83       170     2012      04        12        103              0.099917       6.375153       0.880952       0.194573       0.077000       0.135500       0.047000       0.801000
53578     53578     shanxi         112.4333       39.3667           83       170     2012      04        13        104              0.101458      11.196869       0.000000       0.198192       0.068000   -9999.000000       0.048900       0.551000
53578     53578     shanxi         112.4333       39.3667           83       170     2012      04        14        105              0.102292      13.889465       0.194006       0.191270   -9999.000000   -9999.000000       0.051500   -9999.000000
53578     53578     shanxi         112.4333       39.3667           83       170     2012      04        15        106              0.101792      15.422760       0.264248       0.184522       0.065000       0.048400       0.034700       0.684000
53578     53578     shanxi         112.4333       39.3667           83       170     2012      04        16        107              0.101167      14.330780       0.000000       0.179287       0.059000   -9999.000000       0.050100       0.444000
53578     53578     shanxi         112.4333       39.3667           83       170     2012      04        17        108              0.102333      14.344696       0.000000       0.175828       0.064000   -9999.000000       0.040700       0.764000
53578     53578     shanxi         112.4333       39.3667           83       170     2012      04        18        109              0.101042      17.553986       5.350116       0.172832       0.074000   -9999.000000   -9999.000000       0.492000
53578     53578     shanxi         112.4333       39.3667           83       170     2012      04        19        110              0.100500      14.813965       0.000000       0.223109   -9999.000000   -9999.000000       0.049100   -9999.000000
53578     53578     shanxi         112.4333       39.3667           83       170     2012      04        20        111              0.101125      14.262787       1.789171       0.220731       0.087000       0.039300       0.060200       0.689000
53578     53578     shanxi         112.4333       39.3667           83       170     2012      04        21        112              0.102042      14.917908       0.000000       0.219188       0.063500   -9999.000000       0.043400       0.636000
53578     53578     shanxi         112.4333       39.3667           83       170     2012      04        22        113              0.102250      16.117676       0.000000       0.214599       0.059000       0.103900       0.050300       0.578000
53578     53578     shanxi         112.4333       39.3667           83       170     2012      04        23        114              0.115208      19.586304      32.736084       0.198079       0.071000   -9999.000000       0.042500       0.620000
53578     53578     shanxi         112.4333       39.3667           83       170     2012      04        24        115              0.171625      21.091309       3.227735       0.258016   -9999.000000   -9999.000000       0.091800   -9999.000000
53578     53578     shanxi         112.4333       39.3667           83       170     2012      04        25        116              0.000000      10.937134       0.000000       0.315662   -9999.000000       0.075600   -9999.000000       0.833000
53578     53578     shanxi         112.4333       39.3667           83       170     2012      04        26        117              0.149417       9.876648       0.000000       0.288244       0.072000   -9999.000000       0.040700       0.539000
53578     53578     shanxi         112.4333       39.3667           83       170     2012      04        27        118              0.143000      15.114105       0.000000       0.272358       0.072000       0.017700   -9999.000000       0.575000
53578     53578     shanxi         112.4333       39.3667           83       170     2012      04        28        119              0.139458      13.769501       0.000000       0.260737       0.067000   -9999.000000       0.043700       0.539000
53578     53578     shanxi         112.4333       39.3667           83       170     2012      04        29        120              0.136708      16.435333       0.000000       0.250945       0.071000       0.137500       0.046200   -9999.000000
53578     53578     shanxi         112.4333       39.3667           83       170     2012      04        30        121              0.133167      19.586884       1.954224       0.241609       0.081000       0.065700       0.050900       0.720000
53578     53578     shanxi         112.4333       39.3667           83       170     2012      05        01        122              0.126792      19.352753       0.384680       0.245820       0.077500   -9999.000000       0.072600       0.600000
53578     53578     shanxi         112.4333       39.3667           83       170     2012      05        02        123              0.125667      17.805664       0.579343       0.248969       0.070000   -9999.000000       0.047100       0.609000
53578     53578     shanxi         112.4333       39.3667           83       170     2012      05        03        124              0.122792      19.432770       0.665442       0.236413       0.072000   -9999.000000       0.054800       0.434000
53578     53578     shanxi         112.4333       39.3667           83       170     2012      05        04        125              0.121083      20.733612       0.000000       0.225369       0.065000   -9999.000000       0.042800       0.427000
53578     53578     shanxi         112.4333       39.3667           83       170     2012      05        05        126              0.118125      21.797333       0.000000       0.213360       0.066000   -9999.000000       0.047900       0.528000
53578     53578     shanxi         112.4333       39.3667           83       170     2012      05        06        127              0.115917      21.474854       0.225861       0.201696       0.068000   -9999.000000   -9999.000000       0.740000
53578     53578     shanxi         112.4333       39.3667           83       170     2012      05        07        128              0.113875      23.827026       0.195229       0.194046   -9999.000000   -9999.000000       0.059600       0.644000
53578     53578     shanxi         112.4333       39.3667           83       170     2012      05        08        129              0.111333      23.519745       0.861753       0.191867       0.062000       0.125000       0.058200       0.372000
53578     53578     shanxi         112.4333       39.3667           83       170     2012      05        09        130              0.105417      23.909698       1.925453       0.188994       0.107000   -9999.000000       0.073100       1.000000
53578     53578     shanxi         112.4333       39.3667           83       170     2012      05        10        131              0.108783      19.827606       1.898644       0.223106       0.085000       0.115500       0.050700       0.534000
53578     53578     shanxi         112.4333       39.3667           83       170     2012      05        11        132              0.104125      24.027802       1.583624       0.211160       0.134000   -9999.000000       0.086500       0.826000
53578     53578     shanxi         112.4333       39.3667           83       170     2012      05        12        133              0.105417      17.694427       0.000000       0.240006       0.079000   -9999.000000   -9999.000000       0.482000
53578     53578     shanxi         112.4333       39.3667           83       170     2012      05        13        134              0.105000      16.705109       0.511627       0.219959       0.080000       0.173900       0.041600   -9999.000000
53578     53578     shanxi         112.4333       39.3667           83       170     2012      05        14        135              0.104042      16.221436       0.000000       0.207051       0.073000       0.037600       0.056800       0.373000
53578     53578     shanxi         112.4333       39.3667           83       170     2012      05        15        136              0.103375      15.790100       0.029858       0.198366   -9999.000000   -9999.000000       0.045200       0.361000
53578     53578     shanxi         112.4333       39.3667           83       170     2012      05        16        137              0.102542      18.013062       0.000000       0.190570       0.071000   -9999.000000       0.046800       0.682000
53578     53578     shanxi         112.4333       39.3667           83       170     2012      05        17        138              0.102792      18.447174       0.000000       0.183973       0.067000   -9999.000000       0.050500       0.474000
53578     53578     shanxi         112.4333       39.3667           83       170     2012      05        18        139              0.102667      22.248779       0.000000       0.175607       0.068500       0.046600       0.051900   -9999.000000
53578     53578     shanxi         112.4333       39.3667           83       170     2012      05        19        140              0.099792      24.262054       0.204830       0.170147       0.072000   -9999.000000       0.047700       0.691000
53578     53578     shanxi         112.4333       39.3667           83       170     2012      05        20        141              0.096958      24.217407       2.499282       0.167786       0.069000   -9999.000000       0.055600       0.631000
53578     53578     shanxi         112.4333       39.3667           83       170     2012      05        21        142              0.089375      23.987427       3.877335       0.186439       0.144000       0.085200       0.077300       0.519000
53578     53578     shanxi         112.4333       39.3667           83       170     2012      05        22        143              0.097958      16.659515       0.000000       0.229393       0.086000   -9999.000000       0.053200       0.347000
53578     53578     shanxi         112.4333       39.3667           83       170     2012      05        23        144              0.100667      18.475037       0.322672       0.216509   -9999.000000       0.046800   -9999.000000   -9999.000000
53578     53578     shanxi         112.4333       39.3667           83       170     2012      05        24        145              0.101833      18.247040       0.000000       0.201432       0.075000   -9999.000000       0.048400       0.693000
53578     53578     shanxi         112.4333       39.3667           83       170     2012      05        25        146              0.000000      20.194946       0.066570       0.189590       0.095000   -9999.000000       0.060000       0.586000
53578     53578     shanxi         112.4333       39.3667           83       170     2012      05        26        147              0.100292      18.680878       0.220004       0.184051       0.078000       0.028100       0.040800       0.865000
53578     53578     shanxi         112.4333       39.3667           83       170     2012      05        27        148              0.100000      22.998108       0.183079       0.174219       0.080000   -9999.000000       0.046800       0.649000
53578     53578     shanxi         112.4333       39.3667           83       170     2012      05        28        149              0.101708      24.875275      14.572324       0.166080       0.072000       0.054600       0.048900   -9999.000000
53578     53578     shanxi         112.4333       39.3667           83       170     2012      05        29        150              0.147417      25.612701       0.137825       0.200771       0.118000   -9999.000000   -9999.000000       1.000000
53578     53578     shanxi         112.4333       39.3667           83       170     2012      05        30        151              0.137375      18.572876       0.000000       0.264861       0.084000   -9999.000000       0.042900   -9999.000000
53578     53578     shanxi         112.4333       39.3667           83       170     2012      05        31        152              0.195458      19.041595      28.476320       0.235418   -9999.000000   -9999.000000   -9999.000000   -9999.000000
53578     53578     shanxi         112.4333       39.3667           83       170     2012      06        01        153              0.205417      17.323120       0.000000       0.319408   -9999.000000   -9999.000000       0.093700       0.822000
53578     53578     shanxi         112.4333       39.3667           83       170     2012      06        02        154              0.184542      19.256805       0.259455       0.293068       0.131000       0.130500       0.089200       0.962000
53578     53578     shanxi         112.4333       39.3667           83       170     2012      06        03        155              0.186875      19.957520       5.168660       0.277205       0.190000   -9999.000000       0.104600       0.990000
53578     53578     shanxi         112.4333       39.3667           83       170     2012      06        04        156              0.183208      19.636322       0.196739       0.291935       0.126000   -9999.000000       0.107400       0.738000
53578     53578     shanxi         112.4333       39.3667           83       170     2012      06        05        157              0.173583      22.377930       1.234284       0.267550       0.116000       0.141500       0.080400       0.530000
53578     53578     shanxi         112.4333       39.3667           83       170     2012      06        06        158              0.167167      23.890045       6.778545       0.256017       0.129000   -9999.000000       0.123100       0.980000
53578     53578     shanxi         112.4333       39.3667           83       170     2012      06        07        159              0.173417      18.579315       2.978787       0.290796       0.132000   -9999.000000       0.105000       1.000000
53578     53578     shanxi         112.4333       39.3667           83       170     2012      06        08        160              0.171583      18.994232       0.115298       0.288551       0.099500       0.150600       0.088800       0.701000
53578     53578     shanxi         112.4333       39.3667           83       170     2012      06        09        161              0.160250      21.914520       2.176893       0.269709       0.102000   -9999.000000   -9999.000000       0.684000
53578     53578     shanxi         112.4333       39.3667           83       170     2012      06        10        162              0.156958      20.274780      20.688076       0.269020       0.094500       0.152100       0.071200       0.623000
53578     53578     shanxi         112.4333       39.3667           83       170     2012      06        11        163              0.000000      19.096466       0.923585       0.254184       0.116000   -9999.000000       0.074200   -9999.000000
53578     53578     shanxi         112.4333       39.3667           83       170     2012      06        12        164              0.145958      20.604340       0.000000       0.240627       0.105500   -9999.000000       0.060900       0.833000
53578     53578     shanxi         112.4333       39.3667           83       170     2012      06        13        165              0.140333      21.701385       0.231706       0.231242       0.107000   -9999.000000       0.061400       0.529000
53578     53578     shanxi         112.4333       39.3667           83       170     2012      06        14        166              0.134708      20.902679       0.975081       0.224358       0.109000   -9999.000000       0.066300       0.742000
53578     53578     shanxi         112.4333       39.3667           83       170     2012      06        15        167              0.133625      18.810974       0.931191       0.225687       0.110000       0.011100       0.072700       0.410000
53578     53578     shanxi         112.4333       39.3667           83       170     2012      06        16        168              0.132667      20.779175       0.192723       0.223677       0.110000   -9999.000000       0.047500   -9999.000000
53578     53578     shanxi         112.4333       39.3667           83       170     2012      06        17        169              0.131333      23.555267       0.000000       0.209919       0.104000   -9999.000000       0.071500       0.848000
53578     53578     shanxi         112.4333       39.3667           83       170     2012      06        18        170              0.126667      26.659973       5.502256       0.194877       0.110000       0.026400       0.067200       0.838000
53578     53578     shanxi         112.4333       39.3667           83       170     2012      06        19        171              0.120042      26.560242       0.683481       0.221015   -9999.000000   -9999.000000       0.076400       0.845000
53578     53578     shanxi         112.4333       39.3667           83       170     2012      06        20        172              0.115708      23.488586       3.645143       0.226775       0.124000       0.050500       0.070100       1.000000
53578     53578     shanxi         112.4333       39.3667           83       170     2012      06        21        173              0.113250      23.665009       1.748034       0.242258       0.162000   -9999.000000       0.093000   -9999.000000
53578     53578     shanxi         112.4333       39.3667           83       170     2012      06        22        174              0.119750      23.975006       8.329582       0.243222       0.181000   -9999.000000       0.096300       1.000000
53578     53578     shanxi         112.4333       39.3667           83       170     2012      06        23        175              0.156875      23.634216       3.931526       0.272734       0.187000       0.202600       0.113300       1.000000
53578     53578     shanxi         112.4333       39.3667           83       170     2012      06        24        176              0.173083      24.079254       1.919197       0.271281       0.184000       0.204600       0.077700       1.000000
53578     53578     shanxi         112.4333       39.3667           83       170     2012      06        25        177              0.164125      22.917480       1.664686       0.267591       0.122000   -9999.000000       0.095100       0.867000
53578     53578     shanxi         112.4333       39.3667           83       170     2012      06        26        178              0.153917      24.344696       0.943711       0.251954       0.144500       0.096200   -9999.000000   -9999.000000
53578     53578     shanxi         112.4333       39.3667           83       170     2012      06        27        179              0.149750      24.175995       9.662193       0.244919   -9999.000000   -9999.000000       0.120700       1.000000
53578     53578     shanxi         112.4333       39.3667           83       170     2012      06        28        180              0.220417      21.286377       8.785148       0.264459       0.210000       0.163300       0.113000       1.000000
53578     53578     shanxi         112.4333       39.3667           83       170     2012      06        29        181              0.215000      19.010864       0.172982       0.306951       0.186000       0.357900       0.117600       1.000000
53578     53578     shanxi         112.4333       39.3667           83       170     2012      06        30        182              0.192000      22.690186       3.382305       0.287182       0.139000   -9999.000000       0.084500   -9999.000000
53578     53578     shanxi         112.4333       39.3667           83       170     2012      07        01        183              0.174833      24.905609       0.271014       0.263410       0.145500       0.056200       0.078600       0.886000
53578     53578     shanxi         112.4333       39.3667           83       170     2012      07        02        184              0.159125      26.159119       0.000000       0.247604       0.166000   -9999.000000       0.084600       0.593000
53578     53578     shanxi         112.4333       39.3667           83       170     2012      07        03        185              0.146458      25.665161       9.014513       0.232942       0.147500       0.092900       0.087900       1.000000
53578     53578     shanxi         112.4333       39.3667           83       170     2012      07        04        186              0.142083      24.685791       3.916463       0.269049       0.147500   -9999.000000       0.109900       0.975000
53578     53578     shanxi         112.4333       39.3667           83       170     2012      07        05        187              0.137417      24.183228      13.555289       0.274797       0.153000   -9999.000000       0.076400       0.611000
53578     53578     shanxi         112.4333       39.3667           83       170     2012      07        06        188              0.126542      26.936951       0.264467       0.257881   -9999.000000       0.369200       0.077700       0.902000
53578     53578     shanxi         112.4333       39.3667           83       170     2012      07        07        189              0.113875      27.829010       0.503284       0.240538   -9999.000000   -9999.000000       0.080400       0.579000
53578     53578     shanxi         112.4333       39.3667           83       170     2012      07        08        190              0.104087      25.218048       2.319310       0.235530       0.182000   -9999.000000       0.094000       0.919000
53578     53578     shanxi         112.4333       39.3667           83       170     2012      07        09        191              0.096417      24.774689       0.857787       0.243237       0.158000   -9999.000000       0.078400       0.666000
53578     53578     shanxi         112.4333       39.3667           83       170     2012      07        10        192              0.083625      25.658783       0.854077       0.236183       0.152000   -9999.000000       0.091300   -9999.000000
53578     53578     shanxi         112.4333       39.3667           83       170     2012      07        11        193              0.072000      26.525116       0.000000       0.224848       0.156000       0.023400       0.064800       0.729000
53578     53578     shanxi         112.4333       39.3667           83       170     2012      07        12        194              0.062000      27.119812       0.000000       0.208797       0.175000   -9999.000000       0.070700       0.833000
53578     53578     shanxi         112.4333       39.3667           83       170     2012      07        13        195              0.055458      25.573242       2.015221       0.200186       0.171000       0.188100   -9999.000000       1.000000
53578     53578     shanxi         112.4333       39.3667           83       170     2012      07        14        196              0.123125      25.695770      17.703459       0.212951       0.183000   -9999.000000       0.077200       0.836000
53578     53578     shanxi         112.4333       39.3667           83       170     2012      07        15        197              0.154833      22.404083       0.076207       0.330395       0.162000   -9999.000000       0.082600   -9999.000000
53578     53578     shanxi         112.4333       39.3667           83       170     2012      07        16        198              0.132708      24.430145       0.415454       0.273453       0.157000       0.255800       0.081500       1.000000
53578     53578     shanxi         112.4333       39.3667           83       170     2012      07        17        199              0.111083      24.789093       3.026593       0.250907       0.157000   -9999.000000       0.085100       0.700000
53578     53578     shanxi         112.4333       39.3667           83       170     2012      07        18        200              0.094125      25.118835       0.000000       0.248700       0.153000   -9999.000000       0.092000       0.772000
53578     53578     shanxi         112.4333       39.3667           83       170     2012      07        19        201              0.076625      24.851501       0.000000       0.240680       0.149000   -9999.000000       0.093300       0.593000
53578     53578     shanxi         112.4333       39.3667           83       170     2012      07        20        202              0.061652      25.631561      16.566309       0.225795       0.141000   -9999.000000       0.073600   -9999.000000
53578     53578     shanxi         112.4333       39.3667           83       170     2012      07        21        203              0.258174      27.406128     103.323151       0.239814   -9999.000000       0.310300       0.132100       1.000000
53578     53578     shanxi         112.4333       39.3667           83       170     2012      07        22        204              0.231083      20.207184       0.236607       0.383688       0.256000   -9999.000000       0.135200       1.000000
53578     53578     shanxi         112.4333       39.3667           83       170     2012      07        23        205              0.216167      22.693512       0.116976       0.329235       0.236000   -9999.000000       0.117000       1.000000
53578     53578     shanxi         112.4333       39.3667           83       170     2012      07        24        206              0.204500      22.914612       1.406576       0.316498       0.226000       0.221900   -9999.000000       0.854000
53578     53578     shanxi         112.4333       39.3667           83       170     2012      07        25        207              0.219917      24.570496       6.676926       0.308612       0.245000   -9999.000000       0.101100   -9999.000000
53578     53578     shanxi         112.4333       39.3667           83       170     2012      07        26        208              0.214625      23.171021       1.618680       0.324862       0.227500       0.323100       0.100200       1.000000
53578     53578     shanxi         112.4333       39.3667           83       170     2012      07        27        209              0.209917      25.158722       9.530132       0.312336   -9999.000000   -9999.000000       0.112000       1.000000
53578     53578     shanxi         112.4333       39.3667           83       170     2012      07        28        210              0.213958      24.139801       2.639354       0.315217       0.230500   -9999.000000       0.105200       1.000000
53578     53578     shanxi         112.4333       39.3667           83       170     2012      07        29        211              0.195542      25.248352       0.000000       0.314705       0.224000       0.169500       0.091500       0.802000
53578     53578     shanxi         112.4333       39.3667           83       170     2012      07        30        212              0.209625      25.377045      22.409409       0.296993       0.266000   -9999.000000   -9999.000000       1.000000
53578     53578     shanxi         112.4333       39.3667           83       170     2012      07        31        213              0.231750      20.812775       2.280663       0.333886       0.247000       0.379000       0.101600       1.000000
53578     53578     shanxi         112.4333       39.3667           83       170     2012      08        01        214              0.217458      20.967316       0.051138       0.332637       0.288000   -9999.000000       0.119600       0.921000
53578     53578     shanxi         112.4333       39.3667           83       170     2012      08        02        215              0.205167      23.151764       0.407621       0.313966       0.240000   -9999.000000       0.114900       0.849000
53578     53578     shanxi         112.4333       39.3667           83       170     2012      08        03        216              0.192750      25.061981       0.152890       0.302729       0.251000       0.225400       0.100500       0.862000
53578     53578     shanxi         112.4333       39.3667           83       170     2012      08        04        217              0.180583      26.053497       0.000000       0.292667       0.238000   -9999.000000       0.102100       0.943000
53578     53578     shanxi         112.4333       39.3667           83       170     2012      08        05        218              0.168500      26.329865       0.000000       0.283719       0.197500   -9999.000000       0.098500       0.644000
53578     53578     shanxi         112.4333       39.3667           83       170     2012      08        06        219              0.158583      25.625183      11.801099       0.276493       0.185000       0.109300       0.099000       0.766000
53578     53578     shanxi         112.4333       39.3667           83       170     2012      08        07        220              0.167875      25.605133      17.283880       0.302582       0.214000   -9999.000000   -9999.000000       1.000000
53578     53578     shanxi         112.4333       39.3667           83       170     2012      08        08        221              0.189042      25.439667       1.053134       0.335623       0.227500       0.225200       0.105400   -9999.000000
53578     53578     shanxi         112.4333       39.3667           83       170     2012      08        09        222              0.177083      23.288818       0.000000       0.315773       0.228000   -9999.000000       0.108800       1.000000
53578     53578     shanxi         112.4333       39.3667           83       170     2012      08        10        223              0.163083      24.523438       0.211586       0.296531       0.187500   -9999.000000   -9999.000000       0.773000
53578     53578     shanxi         112.4333       39.3667           83       170     2012      08        11        224              0.208292      24.047913      27.134409       0.286155       0.279000       0.093800       0.105300       0.982000
53578     53578     shanxi         112.4333       39.3667           83       170     2012      08        12        225              0.220083      19.345276       0.000000       0.341197       0.238000   -9999.000000       0.116300       0.984000
53578     53578     shanxi         112.4333       39.3667           83       170     2012      08        13        226              0.202750      22.534668       1.117359       0.318889       0.233000       0.278900       0.093600   -9999.000000
53578     53578     shanxi         112.4333       39.3667           83       170     2012      08        14        227              0.198000      23.131775       1.815288       0.306042       0.243000   -9999.000000       0.102500       1.000000
53578     53578     shanxi         112.4333       39.3667           83       170     2012      08        15        228              0.184792      21.265289       0.000000       0.307219       0.223000   -9999.000000       0.102500       0.936000
53578     53578     shanxi         112.4333       39.3667           83       170     2012      08        16        229              0.172042      21.628906       0.582422       0.294374       0.199000       0.157000       0.104600       1.000000
53578     53578     shanxi         112.4333       39.3667           83       170     2012      08        17        230              0.163250      23.353912       0.383621       0.287855   -9999.000000   -9999.000000       0.080300       0.925000
53578     53578     shanxi         112.4333       39.3667           83       170     2012      08        18        231              0.157417      21.947327       0.306367       0.288566   -9999.000000   -9999.000000       0.104200   -9999.000000
53578     53578     shanxi         112.4333       39.3667           83       170     2012      08        19        232              0.150000      20.841888       0.603434       0.285940       0.201000       0.171300       0.085200       1.000000
53578     53578     shanxi         112.4333       39.3667           83       170     2012      08        20        233              0.140750      23.541199       0.392444       0.276829       0.205000       0.365800       0.104300       0.961000
53578     53578     shanxi         112.4333       39.3667           83       170     2012      08        21        234              0.128750      21.687683       0.400786       0.274172       0.171500       0.112100       0.100500       0.939000
53578     53578     shanxi         112.4333       39.3667           83       170     2012      08        22        235              0.118417      18.584686       0.000000       0.264842       0.171500       0.081800       0.095400   -9999.000000
53578     53578     shanxi         112.4333       39.3667           83       170     2012      08        23        236              0.108500      19.919891       4.630494       0.259482       0.176000   -9999.000000       0.086900   -9999.000000
53578     53578     shanxi         112.4333       39.3667           83       170     2012      08        24        237              0.097750      20.598877       0.000000       0.254459       0.158000       0.078400       0.104500       0.911000
53578     53578     shanxi         112.4333       39.3667           83       170     2012      08        25        238              0.000000      21.776123       3.445362       0.249361       0.208000       0.063600       0.086300       0.735000
53578     53578     shanxi         112.4333       39.3667           83       170     2012      08        26        239              0.076792      22.608307       8.814343       0.245194       0.188000       0.126800       0.094500       0.938000
53578     53578     shanxi         112.4333       39.3667           83       170     2012      08        27        240              0.070083      23.637207       5.680030       0.240740       0.207000   -9999.000000   -9999.000000       1.000000
53578     53578     shanxi         112.4333       39.3667           83       170     2012      08        28        241              0.066708      20.931335       0.086066       0.272062       0.145000   -9999.000000       0.071800       1.000000
53578     53578     shanxi         112.4333       39.3667           83       170     2012      08        29        242              0.060708      22.562927       0.000000       0.261336       0.177000   -9999.000000       0.085000       0.735000
53578     53578     shanxi         112.4333       39.3667           83       170     2012      08        30        243              0.054208      23.264099       0.000000       0.249649       0.187000   -9999.000000       0.068200       0.737000
53578     53578     shanxi         112.4333       39.3667           83       170     2012      08        31        244              0.051167      23.454559       0.489607       0.241719       0.184000       0.173100       0.075000       0.625000
53578     53578     shanxi         112.4333       39.3667           83       170     2012      09        01        245              0.133542      22.716705      29.758125       0.242827       0.230000   -9999.000000       0.093100       1.000000
53578     53578     shanxi         112.4333       39.3667           83       170     2012      09        02        246              0.173000      17.433533       0.000000       0.333144       0.211500   -9999.000000       0.096900       1.000000
53578     53578     shanxi         112.4333       39.3667           83       170     2012      09        03        247              0.153667      17.553864       0.895973       0.306909       0.193000   -9999.000000       0.086800       0.924000
53578     53578     shanxi         112.4333       39.3667           83       170     2012      09        04        248              0.141042      15.284241       0.000000       0.295446       0.166000   -9999.000000       0.114000       0.921000
53578     53578     shanxi         112.4333       39.3667           83       170     2012      09        05        249              0.130500      16.273682       0.000000       0.285207       0.171000   -9999.000000       0.097100       0.874000
53578     53578     shanxi         112.4333       39.3667           83       170     2012      09        06        250              0.128958      18.641937       1.539589       0.278561       0.171500   -9999.000000       0.102400   -9999.000000
53578     53578     shanxi         112.4333       39.3667           83       170     2012      09        07        251              0.140833      17.707153       0.000000       0.283422       0.170500   -9999.000000       0.111600       0.874000
53578     53578     shanxi         112.4333       39.3667           83       170     2012      09        08        252              0.135750      18.596405       0.000000       0.276545       0.162000   -9999.000000       0.101100       0.711000
53578     53578     shanxi         112.4333       39.3667           83       170     2012      09        09        253              0.128458      19.355652       0.000000       0.269673       0.162000   -9999.000000       0.089200       0.839000
53578     53578     shanxi         112.4333       39.3667           83       170     2012      09        10        254              0.121792      20.461609       0.068975       0.262603       0.194000   -9999.000000       0.083600       0.912000
53578     53578     shanxi         112.4333       39.3667           83       170     2012      09        11        255              0.115458      18.554016       0.798646       0.262185       0.147000   -9999.000000       0.065000   -9999.000000
53578     53578     shanxi         112.4333       39.3667           83       170     2012      09        12        256              0.107958      17.025940       0.024200       0.259506       0.132500       0.083800       0.074100       0.913000
53578     53578     shanxi         112.4333       39.3667           83       170     2012      09        13        257              0.104292      12.729950       0.371586       0.259161       0.152000       0.040000   -9999.000000       0.726000
53578     53578     shanxi         112.4333       39.3667           83       170     2012      09        14        258              0.101583      13.587524       0.669510       0.260015       0.142000   -9999.000000       0.059200       0.913000
53578     53578     shanxi         112.4333       39.3667           83       170     2012      09        15        259              0.098708      14.660706       0.000000       0.255761       0.146000   -9999.000000       0.077500       0.582000
53578     53578     shanxi         112.4333       39.3667           83       170     2012      09        16        260              0.095875      16.081329       0.374196       0.251754       0.154000       0.071400       0.064500   -9999.000000
53578     53578     shanxi         112.4333       39.3667           83       170     2012      09        17        261              0.092250      16.782318       0.108989       0.250207       0.131000   -9999.000000       0.066500       0.883000
53578     53578     shanxi         112.4333       39.3667           83       170     2012      09        18        262              0.088625      16.575378       1.096336       0.250803       0.154000       0.136200       0.080600       1.000000
53578     53578     shanxi         112.4333       39.3667           83       170     2012      09        19        263              0.086000      16.522278       0.187933       0.256941   -9999.000000   -9999.000000       0.075400       0.799000
53578     53578     shanxi         112.4333       39.3667           83       170     2012      09        20        264              0.083625      16.794098       4.199836       0.251458       0.147500   -9999.000000       0.067400       0.779000
53578     53578     shanxi         112.4333       39.3667           83       170     2012      09        21        265              0.119125      17.939911       5.898578       0.260661   -9999.000000       0.152800       0.084500   -9999.000000
53578     53578     shanxi         112.4333       39.3667           83       170     2012      09        22        266              0.132917      14.319305       0.000000       0.297602       0.140000   -9999.000000       0.079700       1.000000
53578     53578     shanxi         112.4333       39.3667           83       170     2012      09        23        267              0.128417      16.685364       0.292004       0.278736       0.127500   -9999.000000       0.081500       0.954000
53578     53578     shanxi         112.4333       39.3667           83       170     2012      09        24        268              0.122667      17.566437       0.828859       0.270205       0.126000   -9999.000000   -9999.000000       1.000000
53578     53578     shanxi         112.4333       39.3667           83       170     2012      09        25        269              0.171542      17.667023      13.676025       0.268610       0.179000   -9999.000000       0.085600       1.000000
53578     53578     shanxi         112.4333       39.3667           83       170     2012      09        26        270              0.171333      11.770264       0.185876       0.319043       0.173000       0.191300       0.098400       1.000000
53578     53578     shanxi         112.4333       39.3667           83       170     2012      09        27        271              0.162143      15.245087       0.000000       0.293626   -9999.000000   -9999.000000       0.094200       0.845000
53578     53578     shanxi         112.4333       39.3667           83       170     2012      09        28        272              0.145667      12.204529       0.000000       0.283611       0.131000   -9999.000000       0.081000       0.779000
53578     53578     shanxi         112.4333       39.3667           83       170     2012      09        29        273              0.139750      11.383881       6.913271       0.277864       0.137000   -9999.000000       0.088700       0.754000
53578     53578     shanxi         112.4333       39.3667           83       170     2012      09        30        274              0.133167      11.901367       1.531533       0.277915       0.137000       0.131800   -9999.000000       0.523000
53578     53578     shanxi         112.4333       39.3667           83       170     2012      10        01        275              0.130042      12.082825       0.307477       0.296664       0.107000       0.128700       0.055900       0.770000
53578     53578     shanxi         112.4333       39.3667           83       170     2012      10        02        276              0.126875      13.472626       0.486108       0.282033       0.115000   -9999.000000       0.075000       0.711000
53578     53578     shanxi         112.4333       39.3667           83       170     2012      10        03        277              0.123625      14.582306       0.000000       0.276028       0.109000   -9999.000000       0.060900       0.814000
53578     53578     shanxi         112.4333       39.3667           83       170     2012      10        04        278              0.115625      14.005951      15.551369       0.271118   -9999.000000       0.075400       0.080800       0.892000
53578     53578     shanxi         112.4333       39.3667           83       170     2012      10        05        279              0.117208       9.637665      14.153503       0.310681       0.129000   -9999.000000       0.092000   -9999.000000
53578     53578     shanxi         112.4333       39.3667           83       170     2012      10        06        280              0.119333      10.291138      12.377397       0.329507       0.137000       0.157300       0.074400       0.994000
53578     53578     shanxi         112.4333       39.3667           83       170     2012      10        07        281              0.116625      12.036163       9.220900       0.328362       0.126000   -9999.000000       0.060800       0.699000
53578     53578     shanxi         112.4333       39.3667           83       170     2012      10        08        282              0.114792      12.273682       0.295395       0.326087       0.140000   -9999.000000       0.076000       0.999000
53578     53578     shanxi         112.4333       39.3667           83       170     2012      10        09        283              0.111000      13.661591       0.000000       0.308309       0.119000       0.118900       0.060400       0.661000
53578     53578     shanxi         112.4333       39.3667           83       170     2012      10        10        284              0.107000       9.428284       0.705243       0.299450       0.125000       0.170800       0.070300   -9999.000000
53578     53578     shanxi         112.4333       39.3667           83       170     2012      10        11        285              0.105917       9.741241       0.000000       0.297007       0.099000       0.113700   -9999.000000       1.000000
53578     53578     shanxi         112.4333       39.3667           83       170     2012      10        12        286              0.104625      11.701965       0.000000       0.291378   -9999.000000   -9999.000000       0.055000       0.580000
53578     53578     shanxi         112.4333       39.3667           83       170     2012      10        13        287              0.101083      11.691467       0.000000       0.286980   -9999.000000   -9999.000000       0.069500       0.755000
53578     53578     shanxi         112.4333       39.3667           83       170     2012      10        14        288              0.098000       9.871948       0.000000       0.283841       0.092500   -9999.000000       0.053300       0.655000
53578     53578     shanxi         112.4333       39.3667           83       170     2012      10        15        289              0.096583      10.205078       0.631109       0.282864       0.114500   -9999.000000       0.068300   -9999.000000
53578     53578     shanxi         112.4333       39.3667           83       170     2012      10        16        290              0.093875       9.839691       1.997617       0.285537       0.160000   -9999.000000       0.101900       1.000000
53578     53578     shanxi         112.4333       39.3667           83       170     2012      10        17        291              0.093875       5.935944       0.000000       0.275854       0.138000       0.053200       0.080000       0.733000
53578     53578     shanxi         112.4333       39.3667           83       170     2012      10        18        292              0.093125       5.809387       0.000000       0.274672   -9999.000000   -9999.000000       0.055400       0.809000
53578     53578     shanxi         112.4333       39.3667           83       170     2012      10        19        293              0.094000       6.442017       0.000000       0.275750   -9999.000000       0.236100       0.080700       0.650000
53578     53578     shanxi         112.4333       39.3667           83       170     2012      10        20        294              0.094333       8.848846       0.629444       0.276207       0.106500   -9999.000000       0.066500   -9999.000000
53578     53578     shanxi         112.4333       39.3667           83       170     2012      10        21        295              0.090708      10.665466       0.468588       0.275556   -9999.000000   -9999.000000       0.084400       1.000000
53578     53578     shanxi         112.4333       39.3667           83       170     2012      10        22        296              0.089708       5.437256       0.000000       0.279805   -9999.000000       0.027400       0.085800       0.803000
53578     53578     shanxi         112.4333       39.3667           83       170     2012      10        23        297              0.089167       6.473602       0.000000       0.275613   -9999.000000   -9999.000000       0.072500       0.687000
53578     53578     shanxi         112.4333       39.3667           83       170     2012      10        24        298              0.088875       8.218994       0.000000       0.274557   -9999.000000   -9999.000000       0.054700       0.644000
53578     53578     shanxi         112.4333       39.3667           83       170     2012      10        25        299              0.000000       8.667786       0.000000       0.272426       0.097000   -9999.000000       0.070000       0.749000
53578     53578     shanxi         112.4333       39.3667           83       170     2012      10        26        300              0.085958       9.390533       0.599222       0.271076       0.105000   -9999.000000       0.060400       0.443000
53578     53578     shanxi         112.4333       39.3667           83       170     2012      10        27        301              0.085667       7.738281       0.000000       0.272212       0.105000   -9999.000000       0.066800       0.637000
53578     53578     shanxi         112.4333       39.3667           83       170     2012      10        28        302              0.000000       7.573822       0.000000       0.270133       0.099000   -9999.000000   -9999.000000       0.543000
53578     53578     shanxi         112.4333       39.3667           83       170     2012      10        29        303              0.083292       8.991669       0.473283       0.270437   -9999.000000       0.128600       0.042800       0.216000
53578     53578     shanxi         112.4333       39.3667           83       170     2012      10        30        304              0.080583       5.507324       0.000000       0.249680       0.092000   -9999.000000       0.057000       0.171000
53578     53578     shanxi         112.4333       39.3667           83       170     2012      10        31        305              0.079583       3.572296       0.000000       0.246556       0.090000   -9999.000000       0.049500       0.401000
53578     53578     shanxi         112.4333       39.3667           83       170     2012      11        01        306              0.079083       4.436859       0.000000       0.254895       0.091000   -9999.000000       0.049300       0.753000
53578     53578     shanxi         112.4333       39.3667           83       170     2012      11        02        307              0.078833       5.834198       0.243152       0.264062       0.094000   -9999.000000       0.057900       0.323000
53578     53578     shanxi         112.4333       39.3667           83       170     2012      11        03        308              0.075292       7.763947       1.050709       0.266534   -9999.000000   -9999.000000       0.051400   -9999.000000
53578     53578     shanxi         112.4333       39.3667           83       170     2012      11        04        309              0.073917       0.374817       0.000000       0.205536   -9999.000000   -9999.000000       0.037400       0.485000
53578     53578     shanxi         112.4333       39.3667           83       170     2012      11        05        310              0.074333      -1.678589       0.534510       0.155352       0.104000   -9999.000000       0.047500       0.273000
53578     53578     shanxi         112.4333       39.3667           83       170     2012      11        06        311              0.073542       0.332031       0.334918       0.195808       0.113000       0.059100       0.051300       0.681000
53578     53578     shanxi         112.4333       39.3667           83       170     2012      11        07        312              0.073500       2.278931       0.917768       0.228914   -9999.000000   -9999.000000       0.057600       0.260000
53578     53578     shanxi         112.4333       39.3667           83       170     2012      11        08        313              0.072708       1.940063       0.000000       0.224030   -9999.000000   -9999.000000   -9999.000000   -9999.000000
53578     53578     shanxi         112.4333       39.3667           83       170     2012      11        09        314              0.074125       2.502441       0.270856       0.226563   -9999.000000       0.153400       0.056000       0.749000
53578     53578     shanxi         112.4333       39.3667           83       170     2012      11        10        315              0.072167       3.122955       0.048946       0.254756   -9999.000000       0.076700       0.042200       0.272000
53578     53578     shanxi         112.4333       39.3667           83       170     2012      11        11        316              0.063125      -0.851715       0.000000       0.192154   -9999.000000   -9999.000000       0.049500       0.568000
53578     53578     shanxi         112.4333       39.3667           83       170     2012      11        12        317              0.059000      -2.589630       0.000000       0.152577   -9999.000000   -9999.000000       0.045500       0.257000
53578     53578     shanxi         112.4333       39.3667           83       170     2012      11        13        318              0.000000      -1.464935       0.491036       0.171600   -9999.000000   -9999.000000       0.047900   -9999.000000
53578     53578     shanxi         112.4333       39.3667           83       170     2012      11        14        319              0.047826      -2.436218       0.000000       0.161737   -9999.000000       0.044400   -9999.000000       0.912000
53578     53578     shanxi         112.4333       39.3667           83       170     2012      11        15        320              0.049208      -1.110199       0.351330       0.175661   -9999.000000   -9999.000000       0.038900       0.431000
53578     53578     shanxi         112.4333       39.3667           83       170     2012      11        16        321              0.059542      -0.339478       0.000000       0.183000   -9999.000000       0.032500       0.047700       0.627000
53578     53578     shanxi         112.4333       39.3667           83       170     2012      11        17        322              0.000000      -1.639832       0.000000       0.167993       0.099000   -9999.000000       0.045000       0.465000
53578     53578     shanxi         112.4333       39.3667           83       170     2012      11        18        323              0.064542       0.253296       0.000000       0.188388   -9999.000000   -9999.000000       0.046500   -9999.000000
53578     53578     shanxi         112.4333       39.3667           83       170     2012      11        19        324              0.058417      -0.393494       0.000000       0.189154   -9999.000000       0.063500       0.051700       0.654000
53578     53578     shanxi         112.4333       39.3667           83       170     2012      11        20        325              0.061208      -0.086273       0.000000       0.187999   -9999.000000   -9999.000000       0.047900       0.498000
53578     53578     shanxi         112.4333       39.3667           83       170     2012      11        21        326              0.071375       0.581696       0.000000       0.196370       0.101000   -9999.000000       0.043900       0.687000
53578     53578     shanxi         112.4333       39.3667           83       170     2012      11        22        327              0.072542       2.029083       0.000000       0.229512   -9999.000000   -9999.000000       0.047600       0.106000
53578     53578     shanxi         112.4333       39.3667           83       170     2012      11        23        328              0.049167      -1.347382       0.000000       0.181722   -9999.000000       0.032500       0.040800       0.699000
53578     53578     shanxi         112.4333       39.3667           83       170     2012      11        24        329              0.040625      -3.406189       0.000000       0.148295   -9999.000000   -9999.000000       0.050800       0.295000
53578     53578     shanxi         112.4333       39.3667           83       170     2012      11        25        330              0.041833      -0.502014       0.000000       0.177969   -9999.000000   -9999.000000   -9999.000000       0.946000
53578     53578     shanxi         112.4333       39.3667           83       170     2012      11        26        331              0.035125      -2.848572       0.000000       0.152868   -9999.000000   -9999.000000   -9999.000000       0.749000
53578     53578     shanxi         112.4333       39.3667           83       170     2012      11        27        332              0.045958      -2.016144       0.000000       0.154717   -9999.000000   -9999.000000       0.049800       0.324000
53578     53578     shanxi         112.4333       39.3667           83       170     2012      11        28        333              0.031667      -1.849487       0.000000       0.170464   -9999.000000       0.132200       0.028700       0.446000
53578     53578     shanxi         112.4333       39.3667           83       170     2012      11        29        334              0.024667      -5.011780       0.000000       0.134796   -9999.000000       0.074800       0.041300       0.297000
53578     53578     shanxi         112.4333       39.3667           83       170     2012      11        30        335              0.021542      -4.095642       0.000000       0.145370   -9999.000000   -9999.000000       0.045200       0.465000
53578     53578     shanxi         112.4333       39.3667           83       170     2012      12        01        336              0.022458      -4.951874       0.000000       0.132511   -9999.000000   -9999.000000   -9999.000000       0.109000
53578     53578     shanxi         112.4333       39.3667           83       170     2012      12        02        337              0.024708      -3.245972       0.000000       0.141433   -9999.000000       0.042000       0.029000   -9999.000000
53578     53578     shanxi         112.4333       39.3667           83       170     2012      12        03        338              0.021042      -2.538147       0.000000       0.160776   -9999.000000   -9999.000000       0.043600       0.530000
53578     53578     shanxi         112.4333       39.3667           83       170     2012      12        04        339              0.020708      -6.096466       0.000000       0.124591   -9999.000000   -9999.000000       0.034900       0.202000
53578     53578     shanxi         112.4333       39.3667           83       170     2012      12        05        340              0.016625      -4.969604       0.000000       0.131437   -9999.000000   -9999.000000       0.041500       0.546000
53578     53578     shanxi         112.4333       39.3667           83       170     2012      12        06        341              0.016333      -8.452942       0.000000       0.118515   -9999.000000   -9999.000000       0.043300       0.103000
53578     53578     shanxi         112.4333       39.3667           83       170     2012      12        07        342              0.014667      -6.591003       0.000000       0.119144   -9999.000000   -9999.000000       0.039400   -9999.000000
53578     53578     shanxi         112.4333       39.3667           83       170     2012      12        08        343              0.055545      -8.985718       0.000000       0.116675   -9999.000000   -9999.000000       0.032800       0.480000
53578     53578     shanxi         112.4333       39.3667           83       170     2012      12        09        344              0.074125     -11.866058       0.000000       0.112812   -9999.000000   -9999.000000       0.046200       0.070000
53578     53578     shanxi         112.4333       39.3667           83       170     2012      12        10        345              0.018583      -8.023132       0.000000       0.114302   -9999.000000   -9999.000000       0.034600       0.481000
53578     53578     shanxi         112.4333       39.3667           83       170     2012      12        11        346              0.012875      -7.000397       0.000000       0.122327   -9999.000000   -9999.000000       0.040400       0.140000
53578     53578     shanxi         112.4333       39.3667           83       170     2012      12        12        347              0.013000      -7.598938       0.000000       0.115838   -9999.000000   -9999.000000   -9999.000000   -9999.000000
53578     53578     shanxi         112.4333       39.3667           83       170     2012      12        13        348              0.014375      -6.808441       0.197997       0.123929   -9999.000000   -9999.000000       0.031900       0.653000
53578     53578     shanxi         112.4333       39.3667           83       170     2012      12        14        349              0.017208      -6.436188       0.000000       0.117318   -9999.000000   -9999.000000       0.038600       0.123000
53578     53578     shanxi         112.4333       39.3667           83       170     2012      12        15        350              0.000000      -4.654785       0.000000       0.123300   -9999.000000   -9999.000000       0.031600       0.227000
53578     53578     shanxi         112.4333       39.3667           83       170     2012      12        16        351              0.021167      -2.915192       0.000000       0.143301   -9999.000000   -9999.000000       0.036900       0.579000
53578     53578     shanxi         112.4333       39.3667           83       170     2012      12        17        352              0.015667      -2.969879       0.000000       0.148276   -9999.000000       0.109600       0.035800   -9999.000000
53578     53578     shanxi         112.4333       39.3667           83       170     2012      12        18        353              0.012833      -8.011353       0.000000       0.120327   -9999.000000   -9999.000000       0.039600       0.608000
53578     53578     shanxi         112.4333       39.3667           83       170     2012      12        19        354              0.012625      -8.057098       0.000000       0.113785   -9999.000000   -9999.000000       0.027300       0.576000
53578     53578     shanxi         112.4333       39.3667           83       170     2012      12        20        355              0.000000      -6.688141       0.068541       0.119337   -9999.000000   -9999.000000       0.042200       0.461000
53578     53578     shanxi         112.4333       39.3667           83       170     2012      12        21        356              0.013875      -6.371490       0.054705       0.116890   -9999.000000   -9999.000000       0.031900       0.045000
53578     53578     shanxi         112.4333       39.3667           83       170     2012      12        22        357              0.011208      -8.340942       0.000000       0.116036   -9999.000000   -9999.000000       0.038400       0.137000
53578     53578     shanxi         112.4333       39.3667           83       170     2012      12        23        358              0.009167     -13.797241       0.000000       0.112124   -9999.000000   -9999.000000   -9999.000000       0.220000
53578     53578     shanxi         112.4333       39.3667           83       170     2012      12        24        359              0.009000     -15.079620       0.000000       0.108143   -9999.000000   -9999.000000       0.042100       0.292000
53578     53578     shanxi         112.4333       39.3667           83       170     2012      12        25        360              0.010000     -13.004822       0.000000       0.108714   -9999.000000   -9999.000000       0.033900       0.159000
53578     53578     shanxi         112.4333       39.3667           83       170     2012      12        26        361              0.000000     -10.963837       0.000000       0.109142   -9999.000000   -9999.000000       0.044600       0.206000
53578     53578     shanxi         112.4333       39.3667           83       170     2012      12        27        362              0.010909      -8.783905       0.000000       0.111682   -9999.000000   -9999.000000       0.032300       0.326000
53578     53578     shanxi         112.4333       39.3667           83       170     2012      12        28        363              0.011000      -7.292114       0.545556       0.115837   -9999.000000   -9999.000000       0.034000       0.027000
53578     53578     shanxi         112.4333       39.3667           83       170     2012      12        29        364              0.000000      -9.120422       0.000000       0.113190   -9999.000000   -9999.000000   -9999.000000       0.522000
53578     53578     shanxi         112.4333       39.3667           83       170     2012      12        30        365              0.000000     -12.483124       0.000000       0.111149   -9999.000000   -9999.000000       0.025700       0.102000
53578     53578     shanxi         112.4333       39.3667           83       170     2012      12        31        366              0.011800     -11.044037       0.000000       0.111026   -9999.000000   -9999.000000       0.036200   -9999.000000
