# Supplementary material for: Research on Fusing Multisatellite Soil Moisture Data Based on Bayesian Model Averaging
Source: Hindawi journal article supplement (doi:10.1155/2018/9310838), 2018-06-25
Supplement: f1 [file 9310838.f1.zip › 2012_sm00-10cm_daily_ZDB_ZHY_53582_366days_allin.txt]

53582     53582     shanxi         113.6656       39.7117           81       175     2012      01        01        001              0.000000   -9999.000000       0.000000   -9999.000000   -9999.000000   -9999.000000       0.029300   -9999.000000
53582     53582     shanxi         113.6656       39.7117           81       175     2012      01        02        002              0.053125      -7.309296       0.000000       0.106079   -9999.000000   -9999.000000       0.037600       0.184000
53582     53582     shanxi         113.6656       39.7117           81       175     2012      01        03        003              0.000000     -10.048767       0.000000       0.102169   -9999.000000   -9999.000000       0.039600       0.104000
53582     53582     shanxi         113.6656       39.7117           81       175     2012      01        04        004              0.047333     -11.897156       0.000000       0.101015   -9999.000000   -9999.000000       0.035800   -9999.000000
53582     53582     shanxi         113.6656       39.7117           81       175     2012      01        05        005              0.048000     -11.416992       0.000000       0.100421   -9999.000000   -9999.000000       0.046900       0.070000
53582     53582     shanxi         113.6656       39.7117           81       175     2012      01        06        006              0.047792     -10.033264       0.000000       0.101756   -9999.000000   -9999.000000       0.028500       0.208000
53582     53582     shanxi         113.6656       39.7117           81       175     2012      01        07        007              0.052000      -9.655396       0.000000       0.101339   -9999.000000   -9999.000000       0.035500       0.144000
53582     53582     shanxi         113.6656       39.7117           81       175     2012      01        08        008              0.000000      -7.631927       0.000000       0.104875   -9999.000000   -9999.000000       0.037700       0.109000
53582     53582     shanxi         113.6656       39.7117           81       175     2012      01        09        009              0.050167      -8.259552       0.000000       0.104562   -9999.000000   -9999.000000   -9999.000000   -9999.000000
53582     53582     shanxi         113.6656       39.7117           81       175     2012      01        10        010              0.048167      -8.129150       0.000000       0.105535   -9999.000000   -9999.000000       0.032600       0.173000
53582     53582     shanxi         113.6656       39.7117           81       175     2012      01        11        011              0.047125      -9.904144       0.000000       0.102023   -9999.000000   -9999.000000       0.045700       0.104000
53582     53582     shanxi         113.6656       39.7117           81       175     2012      01        12        012              0.048000      -9.443573       0.000000       0.101102   -9999.000000   -9999.000000       0.033300       0.141000
53582     53582     shanxi         113.6656       39.7117           81       175     2012      01        13        013              0.048958      -7.813843       0.069148       0.108309   -9999.000000   -9999.000000       0.034600       0.021000
53582     53582     shanxi         113.6656       39.7117           81       175     2012      01        14        014              0.050250      -7.902252       0.000000       0.110189   -9999.000000   -9999.000000       0.040800       0.430000
53582     53582     shanxi         113.6656       39.7117           81       175     2012      01        15        015              0.051542      -7.270905       0.000000       0.112552   -9999.000000   -9999.000000       0.040900       0.047000
53582     53582     shanxi         113.6656       39.7117           81       175     2012      01        16        016              0.051917      -6.830444       0.000000       0.114522   -9999.000000   -9999.000000       0.035700       0.009000
53582     53582     shanxi         113.6656       39.7117           81       175     2012      01        17        017              0.000000      -6.911346       0.000000       0.113865   -9999.000000   -9999.000000       0.045600       0.084000
53582     53582     shanxi         113.6656       39.7117           81       175     2012      01        18        018              0.051500      -7.176331       0.000000       0.115870   -9999.000000   -9999.000000       0.028600       0.423000
53582     53582     shanxi         113.6656       39.7117           81       175     2012      01        19        019              0.055458      -6.632324       0.000000       0.113974   -9999.000000   -9999.000000       0.036900       0.114000
53582     53582     shanxi         113.6656       39.7117           81       175     2012      01        20        020              0.054708      -5.711365       0.000000       0.119131   -9999.000000   -9999.000000   -9999.000000       0.108000
53582     53582     shanxi         113.6656       39.7117           81       175     2012      01        21        021              0.051417     -11.835693       0.000000       0.105316   -9999.000000   -9999.000000       0.028000       0.077000
53582     53582     shanxi         113.6656       39.7117           81       175     2012      01        22        022              0.046958     -15.689667       0.000000       0.100487   -9999.000000   -9999.000000       0.038900       0.017000
53582     53582     shanxi         113.6656       39.7117           81       175     2012      01        23        023              0.045500     -15.314972       0.000000       0.099216   -9999.000000   -9999.000000       0.024400   -9999.000000
53582     53582     shanxi         113.6656       39.7117           81       175     2012      01        24        024              0.044708     -14.315002       0.000000       0.099623   -9999.000000   -9999.000000   -9999.000000       0.061000
53582     53582     shanxi         113.6656       39.7117           81       175     2012      01        25        025              0.045292     -13.225098       0.000000       0.099979   -9999.000000   -9999.000000       0.035200       0.128000
53582     53582     shanxi         113.6656       39.7117           81       175     2012      01        26        026              0.046333     -10.752350       0.000000       0.100630   -9999.000000   -9999.000000       0.039900       0.206000
53582     53582     shanxi         113.6656       39.7117           81       175     2012      01        27        027              0.047500      -8.996460       0.000000       0.105827   -9999.000000   -9999.000000       0.026800       0.016000
53582     53582     shanxi         113.6656       39.7117           81       175     2012      01        28        028              0.048875      -7.607086       0.000000       0.110908   -9999.000000   -9999.000000       0.039700   -9999.000000
53582     53582     shanxi         113.6656       39.7117           81       175     2012      01        29        029              0.047917      -8.408478       0.000000       0.110144   -9999.000000   -9999.000000       0.030100       0.227000
53582     53582     shanxi         113.6656       39.7117           81       175     2012      01        30        030              0.048583      -9.097839       0.000000       0.104826   -9999.000000   -9999.000000       0.034300       0.151000
53582     53582     shanxi         113.6656       39.7117           81       175     2012      01        31        031              0.049625      -6.876892       0.000000       0.112434   -9999.000000   -9999.000000       0.037300       0.516000
53582     53582     shanxi         113.6656       39.7117           81       175     2012      02        01        032              0.046083      -9.643768       0.000000       0.107215   -9999.000000   -9999.000000       0.040800       0.048000
53582     53582     shanxi         113.6656       39.7117           81       175     2012      02        02        033              0.045292     -12.345795       0.000000       0.100012   -9999.000000   -9999.000000       0.037500   -9999.000000
53582     53582     shanxi         113.6656       39.7117           81       175     2012      02        03        034              0.045875     -11.202148       0.000000       0.099731   -9999.000000   -9999.000000       0.043300       0.142000
53582     53582     shanxi         113.6656       39.7117           81       175     2012      02        04        035              0.047875      -9.564606       0.000000       0.105078   -9999.000000   -9999.000000       0.029300       0.045000
53582     53582     shanxi         113.6656       39.7117           81       175     2012      02        05        036              0.051917      -7.889099       0.000000       0.107643   -9999.000000   -9999.000000       0.038000       0.250000
53582     53582     shanxi         113.6656       39.7117           81       175     2012      02        06        037              0.048917      -5.571503       0.000000       0.121060   -9999.000000   -9999.000000   -9999.000000       0.096000
53582     53582     shanxi         113.6656       39.7117           81       175     2012      02        07        038              0.046000     -12.333679       0.000000       0.103937   -9999.000000   -9999.000000       0.037100   -9999.000000
53582     53582     shanxi         113.6656       39.7117           81       175     2012      02        08        039              0.046250     -11.873596       0.000000       0.100671   -9999.000000   -9999.000000       0.048900       0.146000
53582     53582     shanxi         113.6656       39.7117           81       175     2012      02        09        040              0.046458      -9.980072       0.000000       0.101916   -9999.000000   -9999.000000       0.034700       0.019000
53582     53582     shanxi         113.6656       39.7117           81       175     2012      02        10        041              0.046792      -9.806580       0.000000       0.102812   -9999.000000   -9999.000000       0.035300       0.032000
53582     53582     shanxi         113.6656       39.7117           81       175     2012      02        11        042              0.049042      -8.108032       0.000000       0.109440   -9999.000000   -9999.000000       0.040300       0.268000
53582     53582     shanxi         113.6656       39.7117           81       175     2012      02        12        043              0.050250      -5.911285       0.000000       0.122788   -9999.000000   -9999.000000   -9999.000000   -9999.000000
53582     53582     shanxi         113.6656       39.7117           81       175     2012      02        13        044              0.056750      -6.124969       0.000000       0.118214       0.077000   -9999.000000   -9999.000000       0.001000
53582     53582     shanxi         113.6656       39.7117           81       175     2012      02        14        045              0.057333      -1.855072       0.000000       0.144956   -9999.000000   -9999.000000       0.048300       0.052000
53582     53582     shanxi         113.6656       39.7117           81       175     2012      02        15        046              0.054000      -4.907288       0.000000       0.132967   -9999.000000   -9999.000000       0.037500       0.061000
53582     53582     shanxi         113.6656       39.7117           81       175     2012      02        16        047              0.050417      -6.431702       0.000000       0.124274   -9999.000000   -9999.000000       0.042600       0.046000
53582     53582     shanxi         113.6656       39.7117           81       175     2012      02        17        048              0.049042      -9.119812       0.000000       0.107502   -9999.000000   -9999.000000       0.043700       0.151000
53582     53582     shanxi         113.6656       39.7117           81       175     2012      02        18        049              0.048917      -9.369751       0.000000       0.106231   -9999.000000   -9999.000000       0.042600       0.121000
53582     53582     shanxi         113.6656       39.7117           81       175     2012      02        19        050              0.050208      -7.729309       0.000000       0.113919   -9999.000000   -9999.000000       0.041000       0.087000
53582     53582     shanxi         113.6656       39.7117           81       175     2012      02        20        051              0.056208      -5.576324       0.000000       0.125127       0.083000   -9999.000000       0.051500       0.160000
53582     53582     shanxi         113.6656       39.7117           81       175     2012      02        21        052              0.063958      -1.603058       0.000000       0.145217   -9999.000000   -9999.000000   -9999.000000   -9999.000000
53582     53582     shanxi         113.6656       39.7117           81       175     2012      02        22        053              0.067292       1.273346       0.000000       0.158003   -9999.000000   -9999.000000       0.046100       0.290000
53582     53582     shanxi         113.6656       39.7117           81       175     2012      02        23        054              0.066708      -1.204559       0.000000       0.148893       0.067000   -9999.000000   -9999.000000       0.146000
53582     53582     shanxi         113.6656       39.7117           81       175     2012      02        24        055              0.067875      -0.668549       0.000000       0.146488       0.084000   -9999.000000       0.039600       0.676000
53582     53582     shanxi         113.6656       39.7117           81       175     2012      02        25        056              0.061958      -3.768341       0.000000       0.135974   -9999.000000       0.094300       0.049000       0.105000
53582     53582     shanxi         113.6656       39.7117           81       175     2012      02        26        057              0.064417      -5.387909       0.000000       0.120634   -9999.000000   -9999.000000       0.039100   -9999.000000
53582     53582     shanxi         113.6656       39.7117           81       175     2012      02        27        058              0.066167      -2.986542       0.000000       0.138735   -9999.000000   -9999.000000   -9999.000000       0.403000
53582     53582     shanxi         113.6656       39.7117           81       175     2012      02        28        059              0.071917      -0.906677       0.000000       0.145805       0.071000   -9999.000000       0.043000       0.024000
53582     53582     shanxi         113.6656       39.7117           81       175     2012      02        29        060              0.000000   -9999.000000       0.000000   -9999.000000       0.073000   -9999.000000   -9999.000000   -9999.000000
53582     53582     shanxi         113.6656       39.7117           81       175     2012      03        01        061              0.081333       1.242126       0.000000       0.155854   -9999.000000   -9999.000000       0.041000       0.340000
53582     53582     shanxi         113.6656       39.7117           81       175     2012      03        02        062              0.084250      -0.489105       0.000000       0.148626       0.092000   -9999.000000       0.052900   -9999.000000
53582     53582     shanxi         113.6656       39.7117           81       175     2012      03        03        063              0.085208       0.325562       0.000000       0.154196   -9999.000000   -9999.000000       0.039700       0.408000
53582     53582     shanxi         113.6656       39.7117           81       175     2012      03        04        064              0.085500      -0.251221       0.000000       0.151047   -9999.000000   -9999.000000       0.043500       0.231000
53582     53582     shanxi         113.6656       39.7117           81       175     2012      03        05        065              0.084708       0.748352       0.000000       0.154185   -9999.000000       0.059700       0.053500       0.343000
53582     53582     shanxi         113.6656       39.7117           81       175     2012      03        06        066              0.076917      -2.828400       0.000000       0.141103       0.086000       0.166200       0.047900       0.146000
53582     53582     shanxi         113.6656       39.7117           81       175     2012      03        07        067              0.000000      -1.343414       0.000000       0.144008       0.083000       0.007300       0.047500   -9999.000000
53582     53582     shanxi         113.6656       39.7117           81       175     2012      03        08        068              0.076000      -1.472015       0.000000       0.144163   -9999.000000   -9999.000000       0.053500       0.123000
53582     53582     shanxi         113.6656       39.7117           81       175     2012      03        09        069              0.079625      -2.431732       0.000000       0.138333   -9999.000000   -9999.000000       0.043500       0.049000
53582     53582     shanxi         113.6656       39.7117           81       175     2012      03        10        070              0.081542       0.868927       0.000000       0.153355       0.068000       0.009200       0.047300       0.347000
53582     53582     shanxi         113.6656       39.7117           81       175     2012      03        11        071              0.073583      -3.790771       0.000000       0.136312       0.073000       0.092900   -9999.000000       0.108000
53582     53582     shanxi         113.6656       39.7117           81       175     2012      03        12        072              0.074583      -3.737274       0.000000       0.131847       0.075000   -9999.000000       0.038800   -9999.000000
53582     53582     shanxi         113.6656       39.7117           81       175     2012      03        13        073              0.079125      -0.059967       0.000000       0.145634   -9999.000000   -9999.000000       0.047400       0.159000
53582     53582     shanxi         113.6656       39.7117           81       175     2012      03        14        074              0.087130       2.100677       0.000000       0.153244   -9999.000000   -9999.000000   -9999.000000       0.285000
53582     53582     shanxi         113.6656       39.7117           81       175     2012      03        15        075              0.095083       3.705505       0.000000       0.156117       0.064000       0.005600       0.048600       0.270000
53582     53582     shanxi         113.6656       39.7117           81       175     2012      03        16        076              0.116833       3.908691       0.062003       0.165327       0.076000   -9999.000000       0.051000       0.338000
53582     53582     shanxi         113.6656       39.7117           81       175     2012      03        17        077              0.135167       5.871643       0.000000       0.161094       0.078000       0.039000       0.051800       0.288000
53582     53582     shanxi         113.6656       39.7117           81       175     2012      03        18        078              0.144917       5.116821       0.000000       0.158120       0.080000   -9999.000000       0.040000       0.051000
53582     53582     shanxi         113.6656       39.7117           81       175     2012      03        19        079              0.167000       2.912445       0.000000       0.153359   -9999.000000   -9999.000000       0.052000       0.296000
53582     53582     shanxi         113.6656       39.7117           81       175     2012      03        20        080              0.173167       4.073517       0.146833       0.156444       0.067000       0.155300       0.045700       0.265000
53582     53582     shanxi         113.6656       39.7117           81       175     2012      03        21        081              0.156417       4.845032       0.109954       0.158158   -9999.000000   -9999.000000       0.072500   -9999.000000
53582     53582     shanxi         113.6656       39.7117           81       175     2012      03        22        082              0.159500       2.999451       0.207359       0.158998   -9999.000000   -9999.000000       0.070100       0.581000
53582     53582     shanxi         113.6656       39.7117           81       175     2012      03        23        083              0.154583       4.211426       0.000000       0.166308   -9999.000000       0.142300       0.043500       0.123000
53582     53582     shanxi         113.6656       39.7117           81       175     2012      03        24        084              0.151125       2.391663       0.000000       0.155808   -9999.000000   -9999.000000   -9999.000000       0.752000
53582     53582     shanxi         113.6656       39.7117           81       175     2012      03        25        085              0.000000       5.241547       0.000000       0.156335   -9999.000000       0.031900       0.052900       0.253000
53582     53582     shanxi         113.6656       39.7117           81       175     2012      03        26        086              0.162208       7.046082       0.000000       0.156709       0.071000   -9999.000000       0.052000   -9999.000000
53582     53582     shanxi         113.6656       39.7117           81       175     2012      03        27        087              0.165500       9.301025       0.336144       0.156809       0.075000   -9999.000000       0.055400       0.449000
53582     53582     shanxi         113.6656       39.7117           81       175     2012      03        28        088              0.166833       9.902008       0.000000       0.152271       0.084000       0.003700   -9999.000000       0.300000
53582     53582     shanxi         113.6656       39.7117           81       175     2012      03        29        089              0.168417      12.188873       0.000000       0.152318   -9999.000000       0.217600       0.045600       0.712000
53582     53582     shanxi         113.6656       39.7117           81       175     2012      03        30        090              0.161750       8.769623       0.000000       0.147192   -9999.000000       0.025900       0.059100       0.193000
53582     53582     shanxi         113.6656       39.7117           81       175     2012      03        31        091              0.163167       4.873749       0.000000       0.148006       0.061000   -9999.000000       0.049700   -9999.000000
53582     53582     shanxi         113.6656       39.7117           81       175     2012      04        01        092              0.164750       8.273621       0.000000       0.147752       0.076000       0.025700       0.052000       0.360000
53582     53582     shanxi         113.6656       39.7117           81       175     2012      04        02        093              0.158792       9.366058       0.000000       0.146840       0.081000       0.014100       0.058300       0.128000
53582     53582     shanxi         113.6656       39.7117           81       175     2012      04        03        094              0.153250       4.039001       0.000000       0.141354       0.068000   -9999.000000       0.063100       0.376000
53582     53582     shanxi         113.6656       39.7117           81       175     2012      04        04        095              0.154625       7.582336       0.000000       0.145947   -9999.000000       0.025600       0.049100       0.142000
53582     53582     shanxi         113.6656       39.7117           81       175     2012      04        05        096              0.155167       8.828674       0.000000       0.143908       0.062000   -9999.000000       0.064600   -9999.000000
53582     53582     shanxi         113.6656       39.7117           81       175     2012      04        06        097              0.156333       8.770721       0.161344       0.143829       0.074000   -9999.000000       0.050500       0.367000
53582     53582     shanxi         113.6656       39.7117           81       175     2012      04        07        098              0.167125      11.292084       0.000000       0.143902       0.073000       0.067500       0.057200       0.284000
53582     53582     shanxi         113.6656       39.7117           81       175     2012      04        08        099              0.167750      13.647644       0.000000       0.141632       0.067000   -9999.000000       0.058300       0.277000
53582     53582     shanxi         113.6656       39.7117           81       175     2012      04        09        100              0.168083      13.930817       0.000000       0.139254       0.072000       0.176100       0.053700       0.406000
53582     53582     shanxi         113.6656       39.7117           81       175     2012      04        10        101              0.167083      17.113129       0.344540       0.138222       0.077000       0.086400       0.066400   -9999.000000
53582     53582     shanxi         113.6656       39.7117           81       175     2012      04        11        102              0.161750      12.619476       0.000000       0.143170       0.066000   -9999.000000       0.065500       0.131000
53582     53582     shanxi         113.6656       39.7117           81       175     2012      04        12        103              0.163583       8.410614       0.000000       0.143740       0.075000   -9999.000000       0.052600       0.376000
53582     53582     shanxi         113.6656       39.7117           81       175     2012      04        13        104              0.164083      11.945007       0.000000       0.141917       0.066000   -9999.000000       0.058500       0.334000
53582     53582     shanxi         113.6656       39.7117           81       175     2012      04        14        105              0.168417      14.169983       0.000000       0.139265       0.068000   -9999.000000   -9999.000000       0.356000
53582     53582     shanxi         113.6656       39.7117           81       175     2012      04        15        106              0.170750      16.145172       0.000000       0.136958   -9999.000000       0.048000       0.044100       0.269000
53582     53582     shanxi         113.6656       39.7117           81       175     2012      04        16        107              0.173833      14.569275       0.000000       0.135911       0.058000   -9999.000000       0.066100       0.153000
53582     53582     shanxi         113.6656       39.7117           81       175     2012      04        17        108              0.175250      14.278351       0.000000       0.135591       0.069000       0.154200       0.053600       0.328000
53582     53582     shanxi         113.6656       39.7117           81       175     2012      04        18        109              0.174000      17.873962       1.148179       0.134798       0.082000   -9999.000000   -9999.000000       0.727000
53582     53582     shanxi         113.6656       39.7117           81       175     2012      04        19        110              0.175500      14.400360       0.000000       0.150398       0.073000       0.133200       0.063300   -9999.000000
53582     53582     shanxi         113.6656       39.7117           81       175     2012      04        20        111              0.178500      15.761658       0.874316       0.149398   -9999.000000       0.062000       0.078800       0.351000
53582     53582     shanxi         113.6656       39.7117           81       175     2012      04        21        112              0.182167      16.195709       0.000000       0.146284       0.068500   -9999.000000       0.057200       0.146000
53582     53582     shanxi         113.6656       39.7117           81       175     2012      04        22        113              0.186000      17.399261       0.000000       0.149358       0.072500       0.070200       0.068900       0.385000
53582     53582     shanxi         113.6656       39.7117           81       175     2012      04        23        114              0.191000      21.191284      18.569042       0.140357       0.076000   -9999.000000       0.052000       0.366000
53582     53582     shanxi         113.6656       39.7117           81       175     2012      04        24        115              0.199167      21.888733       9.735841       0.190463       0.131000       0.248800       0.100400   -9999.000000
53582     53582     shanxi         113.6656       39.7117           81       175     2012      04        25        116              0.000000      10.612701       0.000000       0.296889   -9999.000000       0.287600       0.072000       0.389000
53582     53582     shanxi         113.6656       39.7117           81       175     2012      04        26        117              0.183333       9.942505       0.000000       0.259088       0.075000   -9999.000000       0.054100       0.278000
53582     53582     shanxi         113.6656       39.7117           81       175     2012      04        27        118              0.182000      15.045380       0.000000       0.240087       0.069000       0.242000   -9999.000000       0.389000
53582     53582     shanxi         113.6656       39.7117           81       175     2012      04        28        119              0.180750      13.629883       0.000000       0.224037       0.071000   -9999.000000       0.048100       0.364000
53582     53582     shanxi         113.6656       39.7117           81       175     2012      04        29        120              0.181917      16.628021       0.000000       0.210177       0.068500       0.093300       0.051300   -9999.000000
53582     53582     shanxi         113.6656       39.7117           81       175     2012      04        30        121              0.180917      20.148865       0.152344       0.195710       0.074000       0.021700       0.065300       0.313000
53582     53582     shanxi         113.6656       39.7117           81       175     2012      05        01        122              0.178000      20.033813       0.090405       0.186646       0.080000   -9999.000000       0.080300       0.344000
53582     53582     shanxi         113.6656       39.7117           81       175     2012      05        02        123              0.178333      20.268860       0.000000       0.177884       0.068000   -9999.000000       0.055700       0.431000
53582     53582     shanxi         113.6656       39.7117           81       175     2012      05        03        124              0.177750      21.366455       0.147679       0.167166       0.072000       0.133200       0.070800       0.266000
53582     53582     shanxi         113.6656       39.7117           81       175     2012      05        04        125              0.176417      23.170471       0.000000       0.158449       0.072000   -9999.000000       0.057700   -9999.000000
53582     53582     shanxi         113.6656       39.7117           81       175     2012      05        05        126              0.173917      24.552643       0.000000       0.151712       0.067000   -9999.000000       0.056000       0.386000
53582     53582     shanxi         113.6656       39.7117           81       175     2012      05        06        127              0.172583      23.785431       0.000000       0.147571       0.069000   -9999.000000       0.060800       0.257000
53582     53582     shanxi         113.6656       39.7117           81       175     2012      05        07        128              0.171417      25.767456       0.214821       0.144894   -9999.000000       0.215400       0.067900       0.150000
53582     53582     shanxi         113.6656       39.7117           81       175     2012      05        08        129              0.171583      25.519867       1.327288       0.144997       0.065000       0.055700       0.057900       0.307000
53582     53582     shanxi         113.6656       39.7117           81       175     2012      05        09        130              0.164250      25.639160       2.732695       0.143136       0.102000       0.226200       0.083600   -9999.000000
53582     53582     shanxi         113.6656       39.7117           81       175     2012      05        10        131              0.174083      20.596436       1.373598       0.181066   -9999.000000       0.313300       0.064400       0.133000
53582     53582     shanxi         113.6656       39.7117           81       175     2012      05        11        132              0.187833      25.120667       8.122726       0.165965       0.154000   -9999.000000       0.130600       0.870000
53582     53582     shanxi         113.6656       39.7117           81       175     2012      05        12        133              0.197750      17.159027       0.000000       0.237419       0.116000   -9999.000000   -9999.000000       0.477000
53582     53582     shanxi         113.6656       39.7117           81       175     2012      05        13        134              0.189083      16.787903       0.000000       0.226519       0.083500       0.326900       0.076300       0.600000
53582     53582     shanxi         113.6656       39.7117           81       175     2012      05        14        135              0.183833      16.532501       0.000000       0.201854       0.078000   -9999.000000       0.088700       0.306000
53582     53582     shanxi         113.6656       39.7117           81       175     2012      05        15        136              0.180583      15.645477       0.629102       0.186106       0.076500       0.356000       0.065500       0.177000
53582     53582     shanxi         113.6656       39.7117           81       175     2012      05        16        137              0.179083      17.059784       0.000000       0.179593       0.075000       0.188800       0.064600       0.321000
53582     53582     shanxi         113.6656       39.7117           81       175     2012      05        17        138              0.183667      18.523926       0.000000       0.168059       0.076000   -9999.000000       0.068400       0.283000
53582     53582     shanxi         113.6656       39.7117           81       175     2012      05        18        139              0.183917      23.560455       0.000000       0.155652       0.079500       0.053800       0.081900   -9999.000000
53582     53582     shanxi         113.6656       39.7117           81       175     2012      05        19        140              0.180917      25.010895       1.614591       0.148143       0.079000   -9999.000000       0.079500       0.363000
53582     53582     shanxi         113.6656       39.7117           81       175     2012      05        20        141              0.175333      24.462433       3.152071       0.160297   -9999.000000   -9999.000000       0.098000       0.654000
53582     53582     shanxi         113.6656       39.7117           81       175     2012      05        21        142              0.174417      20.771912       2.488153       0.200785       0.162000       0.371100       0.127100       0.516000
53582     53582     shanxi         113.6656       39.7117           81       175     2012      05        22        143              0.176000      18.179230       0.000000       0.204158       0.095000   -9999.000000       0.092300       0.464000
53582     53582     shanxi         113.6656       39.7117           81       175     2012      05        23        144              0.177417      19.163605       0.000000       0.193720   -9999.000000       0.267300       0.083200   -9999.000000
53582     53582     shanxi         113.6656       39.7117           81       175     2012      05        24        145              0.178917      19.403687       0.000000       0.172787       0.076000   -9999.000000       0.087400       0.421000
53582     53582     shanxi         113.6656       39.7117           81       175     2012      05        25        146              0.000000      20.798126       0.000000       0.159129       0.089000       0.088900       0.086300       0.204000
53582     53582     shanxi         113.6656       39.7117           81       175     2012      05        26        147              0.180583      19.829437       0.000000       0.152537       0.082000       0.159900       0.094100       0.573000
53582     53582     shanxi         113.6656       39.7117           81       175     2012      05        27        148              0.178000      24.299652       0.000000       0.145267       0.084000   -9999.000000       0.074200       0.229000
53582     53582     shanxi         113.6656       39.7117           81       175     2012      05        28        149              0.172500      26.318542       3.016397       0.140160       0.076000       0.027600       0.079100   -9999.000000
53582     53582     shanxi         113.6656       39.7117           81       175     2012      05        29        150              0.181083      27.163086       4.480522       0.145061       0.101000   -9999.000000   -9999.000000       0.848000
53582     53582     shanxi         113.6656       39.7117           81       175     2012      05        30        151              0.183333      17.962799       0.000000       0.223491       0.089000   -9999.000000       0.079600   -9999.000000
53582     53582     shanxi         113.6656       39.7117           81       175     2012      05        31        152              0.187500      20.162933      20.749985       0.188600   -9999.000000       0.093200   -9999.000000   -9999.000000
53582     53582     shanxi         113.6656       39.7117           81       175     2012      06        01        153              0.210333      15.073029       0.954844       0.276752       0.139000   -9999.000000       0.126300       0.658000
53582     53582     shanxi         113.6656       39.7117           81       175     2012      06        02        154              0.205333      18.795410       0.735909       0.270608       0.103500       0.136000       0.088800   -9999.000000
53582     53582     shanxi         113.6656       39.7117           81       175     2012      06        03        155              0.196667      21.948853       1.632796       0.240288       0.142000   -9999.000000       0.117200       0.512000
53582     53582     shanxi         113.6656       39.7117           81       175     2012      06        04        156              0.200417      19.513855       0.000000       0.245893       0.107000       0.137400       0.138600       0.447000
53582     53582     shanxi         113.6656       39.7117           81       175     2012      06        05        157              0.195000      23.075470       0.000000       0.219737       0.093000       0.046100       0.113100       0.526000
53582     53582     shanxi         113.6656       39.7117           81       175     2012      06        06        158              0.178083      25.537140       0.427626       0.199369       0.099000   -9999.000000       0.136900       0.415000
53582     53582     shanxi         113.6656       39.7117           81       175     2012      06        07        159              0.170333      21.947083       1.606786       0.194221       0.093000   -9999.000000       0.111000   -9999.000000
53582     53582     shanxi         113.6656       39.7117           81       175     2012      06        08        160              0.160667      23.393799       0.040898       0.187819       0.087000       0.024600       0.109400       0.231000
53582     53582     shanxi         113.6656       39.7117           81       175     2012      06        09        161              0.146458      24.553070       1.576048       0.175890   -9999.000000   -9999.000000       0.113700       0.577000
53582     53582     shanxi         113.6656       39.7117           81       175     2012      06        10        162              0.138652      22.868774       0.000000       0.177815       0.080000       0.172900       0.108300       0.413000
53582     53582     shanxi         113.6656       39.7117           81       175     2012      06        11        163              0.000000      20.734772       0.000000       0.173735       0.091000   -9999.000000       0.097200       0.436000
53582     53582     shanxi         113.6656       39.7117           81       175     2012      06        12        164              0.125750      22.977600       0.000000       0.158948       0.092000   -9999.000000       0.114300       0.331000
53582     53582     shanxi         113.6656       39.7117           81       175     2012      06        13        165              0.120125      23.460907       0.135818       0.152169       0.093000       0.038500       0.092300       0.336000
53582     53582     shanxi         113.6656       39.7117           81       175     2012      06        14        166              0.112167      22.363098       0.861660       0.150435       0.095000   -9999.000000       0.101300       0.398000
53582     53582     shanxi         113.6656       39.7117           81       175     2012      06        15        167              0.110542      18.154510       0.000000       0.161701       0.101000       0.031700   -9999.000000       0.458000
53582     53582     shanxi         113.6656       39.7117           81       175     2012      06        16        168              0.111000      21.460724       0.000000       0.155068       0.092000   -9999.000000       0.091300   -9999.000000
53582     53582     shanxi         113.6656       39.7117           81       175     2012      06        17        169              0.109500      26.133575       0.000000       0.145509       0.099000   -9999.000000       0.104000       0.409000
53582     53582     shanxi         113.6656       39.7117           81       175     2012      06        18        170              0.107167      29.613373       1.045157       0.139792       0.085000       0.027000       0.074500       0.416000
53582     53582     shanxi         113.6656       39.7117           81       175     2012      06        19        171              0.102875      29.295105       4.100986       0.147396       0.095000   -9999.000000       0.095200       0.587000
53582     53582     shanxi         113.6656       39.7117           81       175     2012      06        20        172              0.101000      25.373810       0.355588       0.185054       0.106000       0.123900       0.081600       0.514000
53582     53582     shanxi         113.6656       39.7117           81       175     2012      06        21        173              0.100375      25.239471       0.255585       0.179774       0.114000   -9999.000000       0.107600   -9999.000000
53582     53582     shanxi         113.6656       39.7117           81       175     2012      06        22        174              0.100000      25.928009       1.537515       0.160425       0.130000   -9999.000000       0.105700       0.420000
53582     53582     shanxi         113.6656       39.7117           81       175     2012      06        23        175              0.103625      26.712494       6.120471       0.163453       0.128500       0.150400       0.138700       0.458000
53582     53582     shanxi         113.6656       39.7117           81       175     2012      06        24        176              0.133167      27.684662       0.996170       0.192331       0.150000   -9999.000000       0.112000       1.000000
53582     53582     shanxi         113.6656       39.7117           81       175     2012      06        25        177              0.141250      23.643951       0.480839       0.217965       0.125000   -9999.000000       0.100800       0.720000
53582     53582     shanxi         113.6656       39.7117           81       175     2012      06        26        178              0.133125      26.674011       0.898728       0.190115       0.127500       0.163400       0.129100   -9999.000000
53582     53582     shanxi         113.6656       39.7117           81       175     2012      06        27        179              0.125917      24.541260       5.762762       0.185875   -9999.000000   -9999.000000       0.163300       0.541000
53582     53582     shanxi         113.6656       39.7117           81       175     2012      06        28        180              0.139917      23.264862       5.689316       0.191793   -9999.000000       0.305800       0.164700       0.956000
53582     53582     shanxi         113.6656       39.7117           81       175     2012      06        29        181              0.197167      20.381317       0.044037       0.250713       0.150000   -9999.000000       0.144300       1.000000
53582     53582     shanxi         113.6656       39.7117           81       175     2012      06        30        182              0.177583      23.443512       0.000000       0.228957       0.111000       0.070600       0.102300   -9999.000000
53582     53582     shanxi         113.6656       39.7117           81       175     2012      07        01        183              0.149250      26.652496       0.000000       0.198686       0.109000       0.137200       0.101000   -9999.000000
53582     53582     shanxi         113.6656       39.7117           81       175     2012      07        02        184              0.131875      28.247559       0.000000       0.177159       0.133000   -9999.000000   -9999.000000       0.494000
53582     53582     shanxi         113.6656       39.7117           81       175     2012      07        03        185              0.123500      28.482605       0.000000       0.161462       0.121000       0.085600       0.098200       0.478000
53582     53582     shanxi         113.6656       39.7117           81       175     2012      07        04        186              0.118917      29.915894       0.218589       0.151853       0.117500   -9999.000000       0.116200       0.466000
53582     53582     shanxi         113.6656       39.7117           81       175     2012      07        05        187              0.115708      28.788788       2.480042       0.147571       0.127000       0.150700       0.095400       0.771000
53582     53582     shanxi         113.6656       39.7117           81       175     2012      07        06        188              0.111792      29.218140       0.362853       0.162575   -9999.000000       0.163200       0.115300       0.827000
53582     53582     shanxi         113.6656       39.7117           81       175     2012      07        07        189              0.108250      29.158112       0.266583       0.164727   -9999.000000   -9999.000000       0.120000       0.653000
53582     53582     shanxi         113.6656       39.7117           81       175     2012      07        08        190              0.106125      25.869385       2.560955       0.154558       0.159000       0.125200       0.171800       0.685000
53582     53582     shanxi         113.6656       39.7117           81       175     2012      07        09        191              0.107375      26.959717       0.157373       0.166191       0.146000       0.140700       0.119700       0.763000
53582     53582     shanxi         113.6656       39.7117           81       175     2012      07        10        192              0.106167      27.624481       5.202644       0.166364       0.143000   -9999.000000       0.158100       1.000000
53582     53582     shanxi         113.6656       39.7117           81       175     2012      07        11        193              0.104583      25.872437       1.548071       0.199904       0.142000       0.216200       0.098300       0.904000
53582     53582     shanxi         113.6656       39.7117           81       175     2012      07        12        194              0.107250      27.229767       0.319554       0.193796       0.147500   -9999.000000       0.114000       0.510000
53582     53582     shanxi         113.6656       39.7117           81       175     2012      07        13        195              0.114958      25.992188       0.624028       0.178590       0.152000   -9999.000000   -9999.000000       0.493000
53582     53582     shanxi         113.6656       39.7117           81       175     2012      07        14        196              0.150958      26.796539       4.489978       0.166535       0.168000       0.035300       0.115200       0.826000
53582     53582     shanxi         113.6656       39.7117           81       175     2012      07        15        197              0.183333      22.751129       0.000000       0.202443       0.143500   -9999.000000       0.117100   -9999.000000
53582     53582     shanxi         113.6656       39.7117           81       175     2012      07        16        198              0.179583      26.810425       0.000000       0.175277       0.124000       0.029200       0.087200       0.703000
53582     53582     shanxi         113.6656       39.7117           81       175     2012      07        17        199              0.193958      28.125732       0.000000       0.156451       0.128000   -9999.000000       0.090400       0.420000
53582     53582     shanxi         113.6656       39.7117           81       175     2012      07        18        200              0.201958      28.168243       0.000000       0.145534       0.136000   -9999.000000       0.094200       0.927000
53582     53582     shanxi         113.6656       39.7117           81       175     2012      07        19        201              0.197542      29.180115       0.254199       0.139718       0.141000       0.139100   -9999.000000       0.425000
53582     53582     shanxi         113.6656       39.7117           81       175     2012      07        20        202              0.195522      29.612457       1.860600       0.137353       0.120500       0.053500       0.088700   -9999.000000
53582     53582     shanxi         113.6656       39.7117           81       175     2012      07        21        203              0.297174      30.837280      47.041187       0.138684   -9999.000000       0.071100       0.153700       1.000000
53582     53582     shanxi         113.6656       39.7117           81       175     2012      07        22        204              0.266042      20.764252       0.000000       0.327178       0.256000   -9999.000000       0.137700       0.986000
53582     53582     shanxi         113.6656       39.7117           81       175     2012      07        23        205              0.253750      23.451721       0.000000       0.274750       0.200500   -9999.000000       0.124600       1.000000
53582     53582     shanxi         113.6656       39.7117           81       175     2012      07        24        206              0.252292      24.343658       0.692781       0.252905       0.207000       0.242800       0.113300       0.768000
53582     53582     shanxi         113.6656       39.7117           81       175     2012      07        25        207              0.245167      26.800537       2.254676       0.239305       0.243500   -9999.000000       0.129300   -9999.000000
53582     53582     shanxi         113.6656       39.7117           81       175     2012      07        26        208              0.254667      23.934265       2.005796       0.245986       0.219000       0.253000       0.124000       0.976000
53582     53582     shanxi         113.6656       39.7117           81       175     2012      07        27        209              0.251250      26.347839       7.893493       0.242743       0.200000       0.150600       0.113600       0.793000
53582     53582     shanxi         113.6656       39.7117           81       175     2012      07        28        210              0.269375      26.351715       1.116061       0.242653       0.198000   -9999.000000       0.126900       1.000000
53582     53582     shanxi         113.6656       39.7117           81       175     2012      07        29        211              0.263333      25.564209       0.000000       0.259997       0.191000       0.202000       0.110000       0.788000
53582     53582     shanxi         113.6656       39.7117           81       175     2012      07        30        212              0.276875      26.538483      22.939692       0.230585   -9999.000000   -9999.000000   -9999.000000   -9999.000000
53582     53582     shanxi         113.6656       39.7117           81       175     2012      07        31        213              0.278583      21.124725       0.694039       0.289556       0.251000   -9999.000000       0.138200       1.000000
53582     53582     shanxi         113.6656       39.7117           81       175     2012      08        01        214              0.266250      20.660919       0.239750       0.288512       0.292000       0.297500       0.147600       0.937000
53582     53582     shanxi         113.6656       39.7117           81       175     2012      08        02        215              0.261250      22.858002       9.404414       0.267269       0.246000   -9999.000000       0.131600       1.000000
53582     53582     shanxi         113.6656       39.7117           81       175     2012      08        03        216              0.256125      25.853638       0.000000       0.248794       0.229000       0.139200       0.119700       0.799000
53582     53582     shanxi         113.6656       39.7117           81       175     2012      08        04        217              0.250167      26.779541       0.000000       0.232458       0.196000   -9999.000000       0.116300       0.942000
53582     53582     shanxi         113.6656       39.7117           81       175     2012      08        05        218              0.243250      27.649719       0.000000       0.218670       0.178000   -9999.000000       0.126800       0.637000
53582     53582     shanxi         113.6656       39.7117           81       175     2012      08        06        219              0.237958      27.503754       0.823991       0.207654       0.187000       0.149400       0.109000       0.841000
53582     53582     shanxi         113.6656       39.7117           81       175     2012      08        07        220              0.232208      27.849182       4.636817       0.204617       0.184000   -9999.000000   -9999.000000       0.921000
53582     53582     shanxi         113.6656       39.7117           81       175     2012      08        08        221              0.221625      27.403717       0.092460       0.227513       0.202000       0.175200       0.120000       0.948000
53582     53582     shanxi         113.6656       39.7117           81       175     2012      08        09        222              0.220875      24.709015       1.517597       0.227700       0.184000   -9999.000000       0.114000       1.000000
53582     53582     shanxi         113.6656       39.7117           81       175     2012      08        10        223              0.211667      26.207855       0.878870       0.218930       0.180000       0.236900       0.106700       0.569000
53582     53582     shanxi         113.6656       39.7117           81       175     2012      08        11        224              0.225250      26.116699      16.318216       0.199012       0.255000       0.080700       0.130800       1.000000
53582     53582     shanxi         113.6656       39.7117           81       175     2012      08        12        225              0.260458      20.284332       0.000000       0.272624       0.221000   -9999.000000       0.125500       0.821000
53582     53582     shanxi         113.6656       39.7117           81       175     2012      08        13        226              0.249000      23.291718       0.223890       0.260507       0.211000       0.174600       0.121800   -9999.000000
53582     53582     shanxi         113.6656       39.7117           81       175     2012      08        14        227              0.244167      23.590363       7.003689       0.240348       0.241000   -9999.000000       0.118000       1.000000
53582     53582     shanxi         113.6656       39.7117           81       175     2012      08        15        228              0.245000      21.324036       0.000000       0.269622       0.231000       0.218300       0.118800       0.723000
53582     53582     shanxi         113.6656       39.7117           81       175     2012      08        16        229              0.239500      21.914124       0.089516       0.247566       0.180500       0.240200   -9999.000000       0.868000
53582     53582     shanxi         113.6656       39.7117           81       175     2012      08        17        230              0.231792      24.055725       0.369379       0.231258       0.201000   -9999.000000       0.104300       0.661000
53582     53582     shanxi         113.6656       39.7117           81       175     2012      08        18        231              0.220208      23.528625       0.000000       0.225463       0.203000   -9999.000000       0.122000   -9999.000000
53582     53582     shanxi         113.6656       39.7117           81       175     2012      08        19        232              0.215917      21.600952       1.995978       0.217886       0.176000       0.256200       0.099200       0.682000
53582     53582     shanxi         113.6656       39.7117           81       175     2012      08        20        233              0.206833      24.897278       1.446898       0.205472       0.175000       0.148200       0.109400       0.628000
53582     53582     shanxi         113.6656       39.7117           81       175     2012      08        21        234              0.198667      22.444122       0.000000       0.209315       0.168500       0.094100       0.109200       0.905000
53582     53582     shanxi         113.6656       39.7117           81       175     2012      08        22        235              0.189875      20.194000       0.000000       0.194339       0.175000       0.275100       0.125000   -9999.000000
53582     53582     shanxi         113.6656       39.7117           81       175     2012      08        23        236              0.183333      21.288422       0.000000       0.185665       0.186000   -9999.000000       0.104300   -9999.000000
53582     53582     shanxi         113.6656       39.7117           81       175     2012      08        24        237              0.176583      22.990784       0.000000       0.178742       0.165000       0.071900       0.122700       0.638000
53582     53582     shanxi         113.6656       39.7117           81       175     2012      08        25        238              0.000000      24.014435       0.000000       0.171516       0.189000       0.161000       0.108100       0.800000
53582     53582     shanxi         113.6656       39.7117           81       175     2012      08        26        239              0.166042      25.279419       0.000000       0.165737       0.217000       0.094100       0.116600       0.797000
53582     53582     shanxi         113.6656       39.7117           81       175     2012      08        27        240              0.165083      25.155853       2.044219       0.161532       0.206000   -9999.000000       0.107400       0.598000
53582     53582     shanxi         113.6656       39.7117           81       175     2012      08        28        241              0.171500      23.474182       0.270653       0.176300       0.187000   -9999.000000       0.102600   -9999.000000
53582     53582     shanxi         113.6656       39.7117           81       175     2012      08        29        242              0.171583      24.208374       0.000000       0.170764       0.180000       0.141900       0.105800       0.569000
53582     53582     shanxi         113.6656       39.7117           81       175     2012      08        30        243              0.169417      25.753418       0.000000       0.159826       0.167000   -9999.000000       0.113800       0.582000
53582     53582     shanxi         113.6656       39.7117           81       175     2012      08        31        244              0.165000      26.680023       0.460047       0.153067       0.207000       0.215200       0.106000       0.577000
53582     53582     shanxi         113.6656       39.7117           81       175     2012      09        01        245              0.236000      24.208191      40.241199       0.156654       0.237000       0.083500       0.128200       1.000000
53582     53582     shanxi         113.6656       39.7117           81       175     2012      09        02        246              0.257792      18.195160       0.000000       0.299904       0.234500       0.293800   -9999.000000   -9999.000000
53582     53582     shanxi         113.6656       39.7117           81       175     2012      09        03        247              0.245625      17.055481       0.120785       0.290878       0.223000       0.362600       0.134700       0.831000
53582     53582     shanxi         113.6656       39.7117           81       175     2012      09        04        248              0.238750      15.499298       0.053843       0.269759       0.184000   -9999.000000       0.156400       0.775000
53582     53582     shanxi         113.6656       39.7117           81       175     2012      09        05        249              0.231250      16.831970       0.000000       0.256481       0.201000       0.364500       0.128700       0.646000
53582     53582     shanxi         113.6656       39.7117           81       175     2012      09        06        250              0.221458      19.349335       0.615768       0.245268       0.199000   -9999.000000       0.133700       0.836000
53582     53582     shanxi         113.6656       39.7117           81       175     2012      09        07        251              0.217500      19.330505       0.000000       0.241107       0.176000   -9999.000000       0.134600       0.765000
53582     53582     shanxi         113.6656       39.7117           81       175     2012      09        08        252              0.205125      19.676636       1.708153       0.232697       0.168000       0.202800       0.133400       0.537000
53582     53582     shanxi         113.6656       39.7117           81       175     2012      09        09        253              0.194667      20.695709       0.000000       0.222479       0.174000   -9999.000000       0.118200       0.632000
53582     53582     shanxi         113.6656       39.7117           81       175     2012      09        10        254              0.184292      22.155792       0.078298       0.212198       0.195000   -9999.000000       0.106600       0.504000
53582     53582     shanxi         113.6656       39.7117           81       175     2012      09        11        255              0.177958      20.309601       0.132824       0.207522       0.152000       0.190000       0.091600   -9999.000000
53582     53582     shanxi         113.6656       39.7117           81       175     2012      09        12        256              0.170792      18.321716       0.063549       0.204696       0.124500   -9999.000000       0.096500       0.605000
53582     53582     shanxi         113.6656       39.7117           81       175     2012      09        13        257              0.169542      14.202820       1.962331       0.202038       0.131000       0.137200       0.108200       0.778000
53582     53582     shanxi         113.6656       39.7117           81       175     2012      09        14        258              0.172083      13.789948       0.110058       0.218186       0.140000   -9999.000000       0.091000       0.918000
53582     53582     shanxi         113.6656       39.7117           81       175     2012      09        15        259              0.169917      15.296661       0.072207       0.212869       0.146000       0.091900       0.105900       0.514000
53582     53582     shanxi         113.6656       39.7117           81       175     2012      09        16        260              0.168500      16.455017       0.000000       0.204122       0.137000       0.129300       0.101500   -9999.000000
53582     53582     shanxi         113.6656       39.7117           81       175     2012      09        17        261              0.165958      17.621094       0.369556       0.196424       0.137500   -9999.000000       0.083900       0.594000
53582     53582     shanxi         113.6656       39.7117           81       175     2012      09        18        262              0.163792      16.885284       0.237103       0.192933       0.135500       0.100400       0.092500       0.405000
53582     53582     shanxi         113.6656       39.7117           81       175     2012      09        19        263              0.161375      18.096924       0.233240       0.188488       0.143000   -9999.000000   -9999.000000       1.000000
53582     53582     shanxi         113.6656       39.7117           81       175     2012      09        20        264              0.161292      18.074829       1.224397       0.186988       0.137000       0.237400       0.089600       0.647000
53582     53582     shanxi         113.6656       39.7117           81       175     2012      09        21        265              0.157250      19.523102       0.987896       0.185636   -9999.000000       0.238100       0.100800   -9999.000000
53582     53582     shanxi         113.6656       39.7117           81       175     2012      09        22        266              0.160458      16.154999       0.000000       0.203862       0.131000   -9999.000000       0.086600       0.544000
53582     53582     shanxi         113.6656       39.7117           81       175     2012      09        23        267              0.159417      18.502991       0.236217       0.197030       0.107000       0.174500       0.091300       0.484000
53582     53582     shanxi         113.6656       39.7117           81       175     2012      09        24        268              0.158625      18.615845       2.988026       0.189101       0.123000       0.279300       0.096600       0.652000
53582     53582     shanxi         113.6656       39.7117           81       175     2012      09        25        269              0.175208      18.411469      17.304966       0.206306   -9999.000000   -9999.000000       0.114400       0.900000
53582     53582     shanxi         113.6656       39.7117           81       175     2012      09        26        270              0.195792      12.900421       0.800663       0.281407       0.150500       0.249500       0.111900   -9999.000000
53582     53582     shanxi         113.6656       39.7117           81       175     2012      09        27        271              0.192714      14.150177       0.212230       0.279090   -9999.000000   -9999.000000       0.129100       0.762000
53582     53582     shanxi         113.6656       39.7117           81       175     2012      09        28        272              0.188733      11.457001       0.179551       0.259787       0.124000   -9999.000000       0.101500       0.542000
53582     53582     shanxi         113.6656       39.7117           81       175     2012      09        29        273              0.187250      11.115417       0.000000       0.247058       0.135000   -9999.000000       0.114800       0.660000
53582     53582     shanxi         113.6656       39.7117           81       175     2012      09        30        274              0.184917      11.802002       0.000000       0.237736       0.131000   -9999.000000   -9999.000000       0.429000
53582     53582     shanxi         113.6656       39.7117           81       175     2012      10        01        275              0.183348      13.125519       0.000000       0.230382       0.087000   -9999.000000       0.080900   -9999.000000
53582     53582     shanxi         113.6656       39.7117           81       175     2012      10        02        276              0.181583      14.600189       0.957102       0.222638       0.105000   -9999.000000       0.095900       0.441000
53582     53582     shanxi         113.6656       39.7117           81       175     2012      10        03        277              0.177125      15.593018       0.000000       0.216580       0.104000       0.058400       0.079600       0.515000
53582     53582     shanxi         113.6656       39.7117           81       175     2012      10        04        278              0.171333      13.751190       1.142598       0.210245       0.121000       0.097000       0.097300       0.857000
53582     53582     shanxi         113.6656       39.7117           81       175     2012      10        05        279              0.175625      10.469635       0.185676       0.222194       0.137000   -9999.000000       0.102900       0.753000
53582     53582     shanxi         113.6656       39.7117           81       175     2012      10        06        280              0.177958      11.588226       0.000000       0.220599       0.121000       0.151100       0.102800       0.642000
53582     53582     shanxi         113.6656       39.7117           81       175     2012      10        07        281              0.177292      13.734955       0.924162       0.213079       0.112000       0.290600       0.082800       0.430000
53582     53582     shanxi         113.6656       39.7117           81       175     2012      10        08        282              0.179250      13.950104       2.220552       0.208261       0.137000   -9999.000000       0.110000       0.733000
53582     53582     shanxi         113.6656       39.7117           81       175     2012      10        09        283              0.184000      15.234314       0.000000       0.217415       0.111000       0.375300       0.091300       0.568000
53582     53582     shanxi         113.6656       39.7117           81       175     2012      10        10        284              0.184042       9.522064       0.000000       0.221132       0.121000   -9999.000000       0.092700   -9999.000000
53582     53582     shanxi         113.6656       39.7117           81       175     2012      10        11        285              0.185667      10.378937       0.000000       0.213137       0.100000       0.167200       0.089900       0.646000
53582     53582     shanxi         113.6656       39.7117           81       175     2012      10        12        286              0.186917      12.609589       0.000000       0.206487       0.095000       0.137700       0.084200       0.378000
53582     53582     shanxi         113.6656       39.7117           81       175     2012      10        13        287              0.184417      12.959808       0.000000       0.200041   -9999.000000   -9999.000000       0.083100       0.843000
53582     53582     shanxi         113.6656       39.7117           81       175     2012      10        14        288              0.180708      10.231262       0.086230       0.195462       0.096500       0.215300       0.100300       0.423000
53582     53582     shanxi         113.6656       39.7117           81       175     2012      10        15        289              0.179125      11.512329       6.840629       0.194307       0.096000   -9999.000000       0.082400   -9999.000000
53582     53582     shanxi         113.6656       39.7117           81       175     2012      10        16        290              0.212208      10.196869       0.158638       0.220642       0.163000   -9999.000000       0.132800       0.957000
53582     53582     shanxi         113.6656       39.7117           81       175     2012      10        17        291              0.206333       6.100159       0.000000       0.242500       0.133000       0.228700   -9999.000000       0.606000
53582     53582     shanxi         113.6656       39.7117           81       175     2012      10        18        292              0.201333       6.485779       0.000000       0.230891   -9999.000000   -9999.000000       0.082900       0.950000
53582     53582     shanxi         113.6656       39.7117           81       175     2012      10        19        293              0.201667       7.317902       0.000000       0.225161   -9999.000000       0.212800       0.094600       0.556000
53582     53582     shanxi         113.6656       39.7117           81       175     2012      10        20        294              0.210458       9.414551       0.594958       0.219266       0.101500   -9999.000000       0.083100   -9999.000000
53582     53582     shanxi         113.6656       39.7117           81       175     2012      10        21        295              0.215542      11.438843       6.619651       0.214559   -9999.000000       0.248500       0.093700       0.543000
53582     53582     shanxi         113.6656       39.7117           81       175     2012      10        22        296              0.222292       5.658356       0.000000       0.259602   -9999.000000       0.234100       0.106800       0.642000
53582     53582     shanxi         113.6656       39.7117           81       175     2012      10        23        297              0.219917       6.670013       2.218456       0.245402   -9999.000000   -9999.000000       0.095000       0.851000
53582     53582     shanxi         113.6656       39.7117           81       175     2012      10        24        298              0.217792       8.473816       0.000000       0.236303   -9999.000000       0.187000       0.076600       0.482000
53582     53582     shanxi         113.6656       39.7117           81       175     2012      10        25        299              0.000000       9.153168       0.000000       0.229633       0.097000   -9999.000000       0.092200   -9999.000000
53582     53582     shanxi         113.6656       39.7117           81       175     2012      10        26        300              0.216750      10.333405       0.000000       0.224650       0.105000       0.181700       0.078900       0.549000
53582     53582     shanxi         113.6656       39.7117           81       175     2012      10        27        301              0.211667       9.559845       0.000000       0.222470       0.102000       0.382800       0.086000       0.426000
53582     53582     shanxi         113.6656       39.7117           81       175     2012      10        28        302              0.000000       8.010101       0.000000       0.218910       0.089000   -9999.000000       0.084200       0.527000
53582     53582     shanxi         113.6656       39.7117           81       175     2012      10        29        303              0.206000       9.010895       0.000000       0.216184   -9999.000000       0.180600       0.062000       0.276000
53582     53582     shanxi         113.6656       39.7117           81       175     2012      10        30        304              0.199167       4.741241       0.122165       0.195066   -9999.000000   -9999.000000       0.064900   -9999.000000
53582     53582     shanxi         113.6656       39.7117           81       175     2012      10        31        305              0.197375       3.445343       0.000000       0.191981       0.088000   -9999.000000       0.072400       0.208000
53582     53582     shanxi         113.6656       39.7117           81       175     2012      11        01        306              0.196625       4.061829       0.000000       0.197762       0.091000       0.150400       0.063400       0.401000
53582     53582     shanxi         113.6656       39.7117           81       175     2012      11        02        307              0.205958       5.508392       0.189226       0.205404       0.095000   -9999.000000       0.069800       0.573000
53582     53582     shanxi         113.6656       39.7117           81       175     2012      11        03        308              0.202667       8.294098       0.065603       0.205990   -9999.000000   -9999.000000   -9999.000000       0.540000
53582     53582     shanxi         113.6656       39.7117           81       175     2012      11        04        309              0.210417       0.081970       0.000000       0.167678   -9999.000000   -9999.000000       0.052200       0.407000
53582     53582     shanxi         113.6656       39.7117           81       175     2012      11        05        310              0.221792      -3.253357       0.000000       0.129341   -9999.000000       0.231800       0.053100       0.404000
53582     53582     shanxi         113.6656       39.7117           81       175     2012      11        06        311              0.221417      -2.295746       0.000000       0.140949   -9999.000000       0.147700       0.055600       0.389000
53582     53582     shanxi         113.6656       39.7117           81       175     2012      11        07        312              0.214333      -0.426453       0.000000       0.156670   -9999.000000   -9999.000000       0.057100       0.453000
53582     53582     shanxi         113.6656       39.7117           81       175     2012      11        08        313              0.214750       0.195465       0.000000       0.165342       0.103000   -9999.000000   -9999.000000   -9999.000000
53582     53582     shanxi         113.6656       39.7117           81       175     2012      11        09        314              0.242042       1.300659       0.000000       0.173597   -9999.000000       0.076300       0.068000       0.579000
53582     53582     shanxi         113.6656       39.7117           81       175     2012      11        10        315              0.249583       2.721802       0.000000       0.196721   -9999.000000       0.117500       0.033600       0.386000
53582     53582     shanxi         113.6656       39.7117           81       175     2012      11        11        316              0.224583      -1.791931       0.000000       0.154988   -9999.000000       0.100400       0.044000       0.894000
53582     53582     shanxi         113.6656       39.7117           81       175     2012      11        12        317              0.199875      -3.716095       0.000000       0.129906   -9999.000000   -9999.000000       0.034400       0.273000
53582     53582     shanxi         113.6656       39.7117           81       175     2012      11        13        318              0.000000      -2.619232       0.000000       0.139550   -9999.000000       0.118500       0.041700   -9999.000000
53582     53582     shanxi         113.6656       39.7117           81       175     2012      11        14        319              0.134083      -3.995026       0.000000       0.130456   -9999.000000       0.070700   -9999.000000       0.546000
53582     53582     shanxi         113.6656       39.7117           81       175     2012      11        15        320              0.139417      -2.270691       0.000000       0.142772   -9999.000000   -9999.000000       0.037000       0.254000
53582     53582     shanxi         113.6656       39.7117           81       175     2012      11        16        321              0.164708      -0.418610       0.000000       0.155503   -9999.000000   -9999.000000       0.038200       0.529000
53582     53582     shanxi         113.6656       39.7117           81       175     2012      11        17        322              0.000000      -3.018280       0.000000       0.138937   -9999.000000   -9999.000000       0.031900       0.299000
53582     53582     shanxi         113.6656       39.7117           81       175     2012      11        18        323              0.148500      -1.180908       0.000000       0.150414   -9999.000000   -9999.000000       0.042200   -9999.000000
53582     53582     shanxi         113.6656       39.7117           81       175     2012      11        19        324              0.136042      -1.031921       0.000000       0.154769   -9999.000000       0.034100       0.044300       0.399000
53582     53582     shanxi         113.6656       39.7117           81       175     2012      11        20        325              0.137792      -1.350922       0.000000       0.148951   -9999.000000   -9999.000000       0.046700       0.253000
53582     53582     shanxi         113.6656       39.7117           81       175     2012      11        21        326              0.150000      -0.175751       0.000000       0.156861   -9999.000000   -9999.000000       0.035500       0.594000
53582     53582     shanxi         113.6656       39.7117           81       175     2012      11        22        327              0.164167       1.149414       0.000000       0.169470   -9999.000000   -9999.000000       0.044400       0.146000
53582     53582     shanxi         113.6656       39.7117           81       175     2012      11        23        328              0.126083      -3.337433       0.000000       0.138397   -9999.000000       0.138200       0.037700   -9999.000000
53582     53582     shanxi         113.6656       39.7117           81       175     2012      11        24        329              0.120708      -4.376740       0.000000       0.125379   -9999.000000       0.094000       0.040100       0.296000
53582     53582     shanxi         113.6656       39.7117           81       175     2012      11        25        330              0.117333      -1.885376       0.000000       0.143019   -9999.000000   -9999.000000       0.042200       0.048000
53582     53582     shanxi         113.6656       39.7117           81       175     2012      11        26        331              0.106708      -3.553894       0.000000       0.132683   -9999.000000   -9999.000000   -9999.000000       0.366000
53582     53582     shanxi         113.6656       39.7117           81       175     2012      11        27        332              0.108542      -3.587372       0.388311       0.128175   -9999.000000       0.086700       0.037700       0.243000
53582     53582     shanxi         113.6656       39.7117           81       175     2012      11        28        333              0.102250      -1.982941       0.000000       0.146761   -9999.000000       0.181700       0.046900       0.502000
53582     53582     shanxi         113.6656       39.7117           81       175     2012      11        29        334              0.098333      -5.911682       0.000000       0.119017   -9999.000000       0.050800       0.030500       0.152000
53582     53582     shanxi         113.6656       39.7117           81       175     2012      11        30        335              0.097167      -5.332428       0.000000       0.121969   -9999.000000   -9999.000000       0.038500       0.044000
53582     53582     shanxi         113.6656       39.7117           81       175     2012      12        01        336              0.096042      -6.015808       0.000000       0.116378   -9999.000000       0.053400   -9999.000000       0.131000
53582     53582     shanxi         113.6656       39.7117           81       175     2012      12        02        337              0.101292      -5.871826       0.000000       0.113221   -9999.000000   -9999.000000       0.033400       0.204000
53582     53582     shanxi         113.6656       39.7117           81       175     2012      12        03        338              0.096333      -3.874268       0.000000       0.126065   -9999.000000       0.209400       0.041400       0.187000
53582     53582     shanxi         113.6656       39.7117           81       175     2012      12        04        339              0.097083      -7.610962       0.000000       0.112819   -9999.000000   -9999.000000       0.032500       0.021000
53582     53582     shanxi         113.6656       39.7117           81       175     2012      12        05        340              0.090583      -6.616760       0.000000       0.113648   -9999.000000   -9999.000000       0.032300       0.189000
53582     53582     shanxi         113.6656       39.7117           81       175     2012      12        06        341              0.091625      -9.732910       0.000000       0.108747   -9999.000000       0.153300       0.037500       0.088000
53582     53582     shanxi         113.6656       39.7117           81       175     2012      12        07        342              0.091000      -8.256989       0.000000       0.108758   -9999.000000   -9999.000000       0.040800   -9999.000000
53582     53582     shanxi         113.6656       39.7117           81       175     2012      12        08        343              0.083792     -10.518280       0.000000       0.107357   -9999.000000   -9999.000000       0.033900       0.017000
53582     53582     shanxi         113.6656       39.7117           81       175     2012      12        09        344              0.084750     -13.074707       0.000000       0.103711   -9999.000000   -9999.000000       0.041600       0.021000
53582     53582     shanxi         113.6656       39.7117           81       175     2012      12        10        345              0.087042      -9.916351       0.000000       0.103549   -9999.000000   -9999.000000       0.029100       0.372000
53582     53582     shanxi         113.6656       39.7117           81       175     2012      12        11        346              0.087542      -8.263458       0.000000       0.106883   -9999.000000   -9999.000000       0.033300   -9999.000000
53582     53582     shanxi         113.6656       39.7117           81       175     2012      12        12        347              0.087417      -7.771912       0.000000       0.106614   -9999.000000   -9999.000000       0.036800   -9999.000000
53582     53582     shanxi         113.6656       39.7117           81       175     2012      12        13        348              0.089167      -7.574982       0.000000       0.107959   -9999.000000   -9999.000000       0.031900       0.098000
53582     53582     shanxi         113.6656       39.7117           81       175     2012      12        14        349              0.096500      -7.598358       0.000000       0.106453   -9999.000000   -9999.000000       0.031000       0.082000
53582     53582     shanxi         113.6656       39.7117           81       175     2012      12        15        350              0.000000      -5.880981       0.000000       0.109869   -9999.000000   -9999.000000       0.040200       0.200000
53582     53582     shanxi         113.6656       39.7117           81       175     2012      12        16        351              0.105833      -3.406433       0.000000       0.130601   -9999.000000   -9999.000000       0.030100   -9999.000000
53582     53582     shanxi         113.6656       39.7117           81       175     2012      12        17        352              0.091583      -3.758453       0.000000       0.131325   -9999.000000       0.026000       0.029900   -9999.000000
53582     53582     shanxi         113.6656       39.7117           81       175     2012      12        18        353              0.086458      -9.323669       0.000000       0.108609   -9999.000000   -9999.000000   -9999.000000       0.038000
53582     53582     shanxi         113.6656       39.7117           81       175     2012      12        19        354              0.088917      -8.984894       0.000000       0.105317   -9999.000000       0.028300       0.025400   -9999.000000
53582     53582     shanxi         113.6656       39.7117           81       175     2012      12        20        355              0.000000      -7.300629       0.000000       0.110015   -9999.000000   -9999.000000       0.037200       0.264000
53582     53582     shanxi         113.6656       39.7117           81       175     2012      12        21        356              0.090125      -7.528564       0.000000       0.107489   -9999.000000   -9999.000000       0.026900       0.068000
53582     53582     shanxi         113.6656       39.7117           81       175     2012      12        22        357              0.085208      -9.640350       0.000000       0.106784   -9999.000000   -9999.000000       0.027200   -9999.000000
53582     53582     shanxi         113.6656       39.7117           81       175     2012      12        23        358              0.080500     -14.378784       0.000000       0.104003   -9999.000000   -9999.000000   -9999.000000       0.068000
53582     53582     shanxi         113.6656       39.7117           81       175     2012      12        24        359              0.079250     -16.401520       0.000000       0.099278   -9999.000000   -9999.000000       0.035600       0.024000
53582     53582     shanxi         113.6656       39.7117           81       175     2012      12        25        360              0.081125     -13.957855       0.000000       0.099949   -9999.000000   -9999.000000       0.029500       0.067000
53582     53582     shanxi         113.6656       39.7117           81       175     2012      12        26        361              0.000000     -12.673645       0.000000       0.100255   -9999.000000   -9999.000000       0.038900       0.030000
53582     53582     shanxi         113.6656       39.7117           81       175     2012      12        27        362              0.085385     -10.461151       0.000000       0.100840   -9999.000000   -9999.000000       0.026500   -9999.000000
53582     53582     shanxi         113.6656       39.7117           81       175     2012      12        28        363              0.083000      -8.356415       0.000000       0.104485   -9999.000000   -9999.000000       0.029000       0.028000
53582     53582     shanxi         113.6656       39.7117           81       175     2012      12        29        364              0.000000      -9.807678       0.000000       0.102313   -9999.000000   -9999.000000   -9999.000000       0.647000
53582     53582     shanxi         113.6656       39.7117           81       175     2012      12        30        365              0.000000     -13.344971       0.000000       0.101701   -9999.000000   -9999.000000       0.025700       0.015000
53582     53582     shanxi         113.6656       39.7117           81       175     2012      12        31        366              0.085800     -12.325806       0.000000       0.101485   -9999.000000   -9999.000000       0.036400   -9999.000000
