# Supplementary material for: Research on Fusing Multisatellite Soil Moisture Data Based on Bayesian Model Averaging
Source: Hindawi journal article supplement (doi:10.1155/2018/9310838), 2018-06-25
Supplement: f1 [file 9310838.f1.zip › 2012_sm00-10cm_daily_ZDB_ZHY_53584_366days_allin.txt]

53584     53584     shanxi         113.1667       39.5667           82       173     2012      01        01        001              0.000000   -9999.000000       2.191242   -9999.000000   -9999.000000   -9999.000000       0.032900   -9999.000000
53584     53584     shanxi         113.1667       39.5667           82       173     2012      01        02        002              0.073125      -5.916046       0.391553       0.134492   -9999.000000   -9999.000000       0.041200       0.173000
53584     53584     shanxi         113.1667       39.5667           82       173     2012      01        03        003              0.000000      -7.573029       0.000000       0.130222   -9999.000000   -9999.000000   -9999.000000       0.032000
53584     53584     shanxi         113.1667       39.5667           82       173     2012      01        04        004              0.070542     -10.016479       0.000000       0.125817   -9999.000000   -9999.000000       0.035200   -9999.000000
53584     53584     shanxi         113.1667       39.5667           82       173     2012      01        05        005              0.070375      -9.809418       0.740000       0.124403   -9999.000000   -9999.000000       0.047200       0.038000
53584     53584     shanxi         113.1667       39.5667           82       173     2012      01        06        006              0.069750      -8.790558       0.000000       0.127061   -9999.000000   -9999.000000       0.032500       0.061000
53584     53584     shanxi         113.1667       39.5667           82       173     2012      01        07        007              0.071750      -8.621552       0.111432       0.126133   -9999.000000   -9999.000000       0.035600       0.054000
53584     53584     shanxi         113.1667       39.5667           82       173     2012      01        08        008              0.000000      -6.701569       0.000000       0.130580   -9999.000000   -9999.000000       0.043600       0.072000
53584     53584     shanxi         113.1667       39.5667           82       173     2012      01        09        009              0.071625      -6.382629       0.332272       0.140159   -9999.000000   -9999.000000   -9999.000000   -9999.000000
53584     53584     shanxi         113.1667       39.5667           82       173     2012      01        10        010              0.071667      -5.993927       0.000000       0.142150   -9999.000000   -9999.000000       0.026900       0.009000
53584     53584     shanxi         113.1667       39.5667           82       173     2012      01        11        011              0.070875      -7.320679       0.000000       0.138201   -9999.000000   -9999.000000       0.045800       0.141000
53584     53584     shanxi         113.1667       39.5667           82       173     2012      01        12        012              0.071375      -7.694641       0.137202       0.129981   -9999.000000   -9999.000000       0.036200       0.125000
53584     53584     shanxi         113.1667       39.5667           82       173     2012      01        13        013              0.071417      -6.144714       0.213140       0.143236   -9999.000000   -9999.000000       0.043000       0.104000
53584     53584     shanxi         113.1667       39.5667           82       173     2012      01        14        014              0.071625      -6.033783       0.000000       0.144509   -9999.000000   -9999.000000       0.040800       0.120000
53584     53584     shanxi         113.1667       39.5667           82       173     2012      01        15        015              0.072125      -5.621765       0.000000       0.143411   -9999.000000   -9999.000000       0.040300       0.119000
53584     53584     shanxi         113.1667       39.5667           82       173     2012      01        16        016              0.071958      -5.359680       0.000000       0.147580   -9999.000000   -9999.000000       0.036600       0.020000
53584     53584     shanxi         113.1667       39.5667           82       173     2012      01        17        017              0.000000      -5.352814       0.000000       0.143974   -9999.000000   -9999.000000       0.045600       0.093000
53584     53584     shanxi         113.1667       39.5667           82       173     2012      01        18        018              0.071500      -5.038086       0.677805       0.155042   -9999.000000   -9999.000000       0.030800       0.079000
53584     53584     shanxi         113.1667       39.5667           82       173     2012      01        19        019              0.073625      -5.311340       0.000000       0.144772   -9999.000000   -9999.000000       0.042100       0.073000
53584     53584     shanxi         113.1667       39.5667           82       173     2012      01        20        020              0.072667      -4.442566       0.000000       0.152618   -9999.000000   -9999.000000   -9999.000000       0.088000
53584     53584     shanxi         113.1667       39.5667           82       173     2012      01        21        021              0.071000     -10.135895       0.000000       0.129718   -9999.000000   -9999.000000       0.025200       0.012000
53584     53584     shanxi         113.1667       39.5667           82       173     2012      01        22        022              0.069708     -14.213470       0.000000       0.123086   -9999.000000   -9999.000000       0.038500       0.007000
53584     53584     shanxi         113.1667       39.5667           82       173     2012      01        23        023              0.069583     -13.551849       0.000000       0.120091   -9999.000000   -9999.000000       0.027300   -9999.000000
53584     53584     shanxi         113.1667       39.5667           82       173     2012      01        24        024              0.069833     -11.997803       0.000000       0.120787   -9999.000000   -9999.000000   -9999.000000       0.137000
53584     53584     shanxi         113.1667       39.5667           82       173     2012      01        25        025              0.070250     -11.154022       0.000000       0.121321   -9999.000000   -9999.000000       0.038500       0.012000
53584     53584     shanxi         113.1667       39.5667           82       173     2012      01        26        026              0.070917      -8.820618       0.000000       0.123495   -9999.000000   -9999.000000       0.041300       0.057000
53584     53584     shanxi         113.1667       39.5667           82       173     2012      01        27        027              0.071125      -7.234650       0.000000       0.138102   -9999.000000   -9999.000000       0.029300       0.029000
53584     53584     shanxi         113.1667       39.5667           82       173     2012      01        28        028              0.071917      -5.688751       0.128854       0.146250   -9999.000000   -9999.000000       0.043700   -9999.000000
53584     53584     shanxi         113.1667       39.5667           82       173     2012      01        29        029              0.071167      -5.970551       0.000000       0.147643   -9999.000000   -9999.000000       0.034700       0.028000
53584     53584     shanxi         113.1667       39.5667           82       173     2012      01        30        030              0.071875      -7.230103       0.140570       0.136796   -9999.000000   -9999.000000       0.045100       0.078000
53584     53584     shanxi         113.1667       39.5667           82       173     2012      01        31        031              0.071458      -4.798065       0.000000       0.149105   -9999.000000   -9999.000000       0.040800       0.041000
53584     53584     shanxi         113.1667       39.5667           82       173     2012      02        01        032              0.070250      -7.314880       0.000000       0.139761   -9999.000000   -9999.000000       0.041200       0.188000
53584     53584     shanxi         113.1667       39.5667           82       173     2012      02        02        033              0.070125      -9.458923       1.649981       0.125276   -9999.000000   -9999.000000       0.041100   -9999.000000
53584     53584     shanxi         113.1667       39.5667           82       173     2012      02        03        034              0.070625      -8.944305       0.085487       0.125912   -9999.000000   -9999.000000       0.048500       0.220000
53584     53584     shanxi         113.1667       39.5667           82       173     2012      02        04        035              0.070833      -7.175415       0.121563       0.140096   -9999.000000   -9999.000000       0.037200       0.043000
53584     53584     shanxi         113.1667       39.5667           82       173     2012      02        05        036              0.073333      -6.264801       0.000000       0.138943   -9999.000000   -9999.000000       0.042800       0.018000
53584     53584     shanxi         113.1667       39.5667           82       173     2012      02        06        037              0.071375      -3.534729       0.000000       0.163117   -9999.000000   -9999.000000   -9999.000000       0.023000
53584     53584     shanxi         113.1667       39.5667           82       173     2012      02        07        038              0.070417      -9.007263       0.350098       0.129274   -9999.000000   -9999.000000       0.036700   -9999.000000
53584     53584     shanxi         113.1667       39.5667           82       173     2012      02        08        039              0.070708      -9.178131       0.000000       0.125739   -9999.000000   -9999.000000       0.050400       0.081000
53584     53584     shanxi         113.1667       39.5667           82       173     2012      02        09        040              0.070750      -7.752991       0.120006       0.131654   -9999.000000   -9999.000000       0.039800       0.014000
53584     53584     shanxi         113.1667       39.5667           82       173     2012      02        10        041              0.071417      -7.398468       0.000000       0.136458   -9999.000000   -9999.000000       0.036700       0.157000
53584     53584     shanxi         113.1667       39.5667           82       173     2012      02        11        042              0.071826      -5.999146       0.101939       0.144603   -9999.000000   -9999.000000       0.046600       0.099000
53584     53584     shanxi         113.1667       39.5667           82       173     2012      02        12        043              0.071792      -4.723053       0.000000       0.157332   -9999.000000   -9999.000000   -9999.000000       0.045000
53584     53584     shanxi         113.1667       39.5667           82       173     2012      02        13        044              0.075083      -4.901489       0.086968       0.146385       0.072000   -9999.000000   -9999.000000       0.099000
53584     53584     shanxi         113.1667       39.5667           82       173     2012      02        14        045              0.075000      -0.682587       0.100594       0.183380   -9999.000000       0.193300       0.049400       0.097000
53584     53584     shanxi         113.1667       39.5667           82       173     2012      02        15        046              0.073625      -3.052734       0.093999       0.170281   -9999.000000   -9999.000000       0.037700       0.081000
53584     53584     shanxi         113.1667       39.5667           82       173     2012      02        16        047              0.072458      -4.187653       0.000000       0.164282   -9999.000000   -9999.000000       0.045500       0.008000
53584     53584     shanxi         113.1667       39.5667           82       173     2012      02        17        048              0.072125      -6.339966       0.000000       0.143575   -9999.000000   -9999.000000       0.042300       0.044000
53584     53584     shanxi         113.1667       39.5667           82       173     2012      02        18        049              0.072250      -6.564880       0.000000       0.143095   -9999.000000   -9999.000000       0.042600   -9999.000000
53584     53584     shanxi         113.1667       39.5667           82       173     2012      02        19        050              0.073042      -5.691162       0.198665       0.149406       0.079000   -9999.000000       0.042400       0.100000
53584     53584     shanxi         113.1667       39.5667           82       173     2012      02        20        051              0.075208      -3.471954       0.165710       0.164404       0.083000   -9999.000000       0.052400       0.180000
53584     53584     shanxi         113.1667       39.5667           82       173     2012      02        21        052              0.079000      -0.441742       0.090235       0.183784   -9999.000000       0.027000   -9999.000000   -9999.000000
53584     53584     shanxi         113.1667       39.5667           82       173     2012      02        22        053              0.082417       2.206818       0.000000       0.201462   -9999.000000   -9999.000000       0.047100       0.148000
53584     53584     shanxi         113.1667       39.5667           82       173     2012      02        23        054              0.080125       0.969635       0.117645       0.193055       0.069000       0.051800   -9999.000000       0.041000
53584     53584     shanxi         113.1667       39.5667           82       173     2012      02        24        055              0.078375       0.668732       0.742532       0.190160       0.086000   -9999.000000       0.038700       0.091000
53584     53584     shanxi         113.1667       39.5667           82       173     2012      02        25        056              0.075833      -1.583954       0.172356       0.179860   -9999.000000       0.093500       0.048000       0.150000
53584     53584     shanxi         113.1667       39.5667           82       173     2012      02        26        057              0.077833      -3.755859       0.532389       0.155766       0.067000       0.035000       0.043500   -9999.000000
53584     53584     shanxi         113.1667       39.5667           82       173     2012      02        27        058              0.080667      -1.334106       0.111293       0.177862   -9999.000000   -9999.000000   -9999.000000       0.222000
53584     53584     shanxi         113.1667       39.5667           82       173     2012      02        28        059              0.084042       0.629181       0.302518       0.189267       0.071000       0.049000       0.048000       0.035000
53584     53584     shanxi         113.1667       39.5667           82       173     2012      02        29        060              0.000000   -9999.000000       0.287053   -9999.000000       0.074000   -9999.000000   -9999.000000   -9999.000000
53584     53584     shanxi         113.1667       39.5667           82       173     2012      03        01        061              0.084292       1.989441       0.114073       0.197423   -9999.000000   -9999.000000       0.039400       0.126000
53584     53584     shanxi         113.1667       39.5667           82       173     2012      03        02        062              0.085833       0.814636       0.000000       0.195662       0.088000   -9999.000000       0.051100   -9999.000000
53584     53584     shanxi         113.1667       39.5667           82       173     2012      03        03        063              0.085083       1.575470       0.155066       0.202441   -9999.000000   -9999.000000       0.041000       0.382000
53584     53584     shanxi         113.1667       39.5667           82       173     2012      03        04        064              0.091417       1.170929       0.000000       0.199116       0.086000       0.029000       0.047900       0.106000
53584     53584     shanxi         113.1667       39.5667           82       173     2012      03        05        065              0.089500       2.165100       0.261881       0.204653       0.093000       0.050600       0.048500       0.367000
53584     53584     shanxi         113.1667       39.5667           82       173     2012      03        06        066              0.086500      -0.055969       0.231768       0.186782       0.086000   -9999.000000       0.045400       0.044000
53584     53584     shanxi         113.1667       39.5667           82       173     2012      03        07        067              0.000000       0.740204       0.000000       0.189345       0.084000       0.030100       0.049700   -9999.000000
53584     53584     shanxi         113.1667       39.5667           82       173     2012      03        08        068              0.082083       0.329193       0.000000       0.185952   -9999.000000   -9999.000000       0.051000       0.037000
53584     53584     shanxi         113.1667       39.5667           82       173     2012      03        09        069              0.086500      -0.884888       0.000000       0.178032   -9999.000000   -9999.000000       0.044600       0.071000
53584     53584     shanxi         113.1667       39.5667           82       173     2012      03        10        070              0.085292       1.852936       0.000000       0.195203       0.070000       0.127800       0.049400       0.058000
53584     53584     shanxi         113.1667       39.5667           82       173     2012      03        11        071              0.081208      -1.307587       0.000000       0.177225       0.075000       0.163400   -9999.000000       0.029000
53584     53584     shanxi         113.1667       39.5667           82       173     2012      03        12        072              0.086083      -1.208221       0.165430       0.174240       0.078000       0.043500       0.036600       0.045000
53584     53584     shanxi         113.1667       39.5667           82       173     2012      03        13        073              0.093750       1.723328       0.000000       0.187934   -9999.000000   -9999.000000       0.048900       0.002000
53584     53584     shanxi         113.1667       39.5667           82       173     2012      03        14        074              0.098652       3.490173       0.308491       0.197889   -9999.000000       0.145100   -9999.000000       0.164000
53584     53584     shanxi         113.1667       39.5667           82       173     2012      03        15        075              0.101542       4.162720       0.000000       0.198475   -9999.000000       0.068700       0.050800       0.204000
53584     53584     shanxi         113.1667       39.5667           82       173     2012      03        16        076              0.106625       4.000519       0.000000       0.212708       0.081000   -9999.000000       0.056200       0.202000
53584     53584     shanxi         113.1667       39.5667           82       173     2012      03        17        077              0.106292       7.317108       0.164746       0.211661       0.077000   -9999.000000       0.048200       0.134000
53584     53584     shanxi         113.1667       39.5667           82       173     2012      03        18        078              0.105000       6.418243       0.112261       0.204386       0.074000       0.055200       0.042800       0.059000
53584     53584     shanxi         113.1667       39.5667           82       173     2012      03        19        079              0.105042       3.597717       0.000000       0.198206   -9999.000000   -9999.000000       0.059800       0.282000
53584     53584     shanxi         113.1667       39.5667           82       173     2012      03        20        080              0.104083       5.444183       0.000000       0.209174       0.074000       0.062900       0.051400       0.244000
53584     53584     shanxi         113.1667       39.5667           82       173     2012      03        21        081              0.103000       5.937164       0.000000       0.208279   -9999.000000   -9999.000000       0.083900   -9999.000000
53584     53584     shanxi         113.1667       39.5667           82       173     2012      03        22        082              0.107208       3.413391       0.189414       0.209020   -9999.000000       0.064300   -9999.000000       0.586000
53584     53584     shanxi         113.1667       39.5667           82       173     2012      03        23        083              0.108417       5.255646       0.060435       0.215859   -9999.000000       0.123900       0.047700       0.128000
53584     53584     shanxi         113.1667       39.5667           82       173     2012      03        24        084              0.108708       4.449646       0.057499       0.205531   -9999.000000   -9999.000000   -9999.000000       0.205000
53584     53584     shanxi         113.1667       39.5667           82       173     2012      03        25        085              0.000000       7.234436       0.301166       0.202937   -9999.000000       0.107000       0.046800       0.260000
53584     53584     shanxi         113.1667       39.5667           82       173     2012      03        26        086              0.108417       8.508942       0.375580       0.201786       0.071000   -9999.000000       0.058200   -9999.000000
53584     53584     shanxi         113.1667       39.5667           82       173     2012      03        27        087              0.107917      10.198181       0.000000       0.201350       0.077000   -9999.000000       0.061900       0.280000
53584     53584     shanxi         113.1667       39.5667           82       173     2012      03        28        088              0.107333      10.773315       0.000000       0.195387       0.084000       0.276800   -9999.000000       0.268000
53584     53584     shanxi         113.1667       39.5667           82       173     2012      03        29        089              0.106250      12.741669       0.468319       0.190556   -9999.000000   -9999.000000       0.040600       0.254000
53584     53584     shanxi         113.1667       39.5667           82       173     2012      03        30        090              0.103250      10.286652       0.133989       0.186241   -9999.000000       0.317900       0.058500       0.319000
53584     53584     shanxi         113.1667       39.5667           82       173     2012      03        31        091              0.102917       6.359924       0.709717       0.186563       0.070000   -9999.000000       0.056000   -9999.000000
53584     53584     shanxi         113.1667       39.5667           82       173     2012      04        01        092              0.102625       9.531250       0.000000       0.185139       0.078000   -9999.000000       0.057500       0.369000
53584     53584     shanxi         113.1667       39.5667           82       173     2012      04        02        093              0.099875      11.110870       0.000000       0.181796       0.087000       0.212800       0.060900       0.197000
53584     53584     shanxi         113.1667       39.5667           82       173     2012      04        03        094              0.099833       5.288574       0.117469       0.177812   -9999.000000   -9999.000000       0.056600       0.188000
53584     53584     shanxi         113.1667       39.5667           82       173     2012      04        04        095              0.099750       9.256866       0.129801       0.181030   -9999.000000       0.037800       0.051300       0.210000
53584     53584     shanxi         113.1667       39.5667           82       173     2012      04        05        096              0.098833      10.964264       0.071007       0.177838       0.067000   -9999.000000       0.061300   -9999.000000
53584     53584     shanxi         113.1667       39.5667           82       173     2012      04        06        097              0.098667      10.682129       0.027515       0.175060       0.076000       0.253800       0.049900       0.285000
53584     53584     shanxi         113.1667       39.5667           82       173     2012      04        07        098              0.097750      13.081848       0.165579       0.171919       0.074000       0.037600       0.059200       0.301000
53584     53584     shanxi         113.1667       39.5667           82       173     2012      04        08        099              0.096208      14.768921       0.000000       0.168633       0.072000   -9999.000000   -9999.000000       0.174000
53584     53584     shanxi         113.1667       39.5667           82       173     2012      04        09        100              0.095458      14.875183       0.000000       0.166344       0.075000       0.177100       0.051700       0.172000
53584     53584     shanxi         113.1667       39.5667           82       173     2012      04        10        101              0.092917      17.164490       0.742632       0.164894   -9999.000000       0.105600       0.067200       0.065000
53584     53584     shanxi         113.1667       39.5667           82       173     2012      04        11        102              0.091333      13.376617       0.094279       0.173874       0.069000   -9999.000000       0.053900       0.112000
53584     53584     shanxi         113.1667       39.5667           82       173     2012      04        12        103              0.091375       8.436157       0.212381       0.175117       0.074000       0.095500       0.054200       0.308000
53584     53584     shanxi         113.1667       39.5667           82       173     2012      04        13        104              0.090875      12.997589       0.000000       0.173516       0.069000   -9999.000000       0.060300       0.272000
53584     53584     shanxi         113.1667       39.5667           82       173     2012      04        14        105              0.089792      15.439880       0.477433       0.168363       0.069000   -9999.000000       0.060100       0.126000
53584     53584     shanxi         113.1667       39.5667           82       173     2012      04        15        106              0.087667      17.139038       0.000000       0.163702   -9999.000000       0.112100       0.039900       0.191000
53584     53584     shanxi         113.1667       39.5667           82       173     2012      04        16        107              0.085917      15.890259       0.000000       0.161545       0.067000   -9999.000000       0.063400       0.138000
53584     53584     shanxi         113.1667       39.5667           82       173     2012      04        17        108              0.084875      15.701233       0.000000       0.160621       0.066000       0.143300       0.050500       0.268000
53584     53584     shanxi         113.1667       39.5667           82       173     2012      04        18        109              0.083333      18.947235      10.893026       0.159486       0.060000   -9999.000000   -9999.000000       0.650000
53584     53584     shanxi         113.1667       39.5667           82       173     2012      04        19        110              0.083667      15.341522       0.000000       0.251768       0.074000   -9999.000000       0.061100   -9999.000000
53584     53584     shanxi         113.1667       39.5667           82       173     2012      04        20        111              0.083750      15.820740       0.242773       0.243903   -9999.000000       0.150700       0.071300       0.194000
53584     53584     shanxi         113.1667       39.5667           82       173     2012      04        21        112              0.083667      16.703522       0.000000       0.225290       0.068500   -9999.000000       0.055600       0.225000
53584     53584     shanxi         113.1667       39.5667           82       173     2012      04        22        113              0.083625      17.786957       0.000000       0.210844       0.070000       0.039100       0.065300       0.286000
53584     53584     shanxi         113.1667       39.5667           82       173     2012      04        23        114              0.084708      21.286682      27.068848       0.192853       0.070000   -9999.000000       0.053800       0.436000
53584     53584     shanxi         113.1667       39.5667           82       173     2012      04        24        115              0.120958      22.286652       5.572070       0.245146       0.127000       0.156200       0.126200   -9999.000000
53584     53584     shanxi         113.1667       39.5667           82       173     2012      04        25        116              0.000000      12.166992       0.000000       0.324886   -9999.000000       0.204800   -9999.000000       0.422000
53584     53584     shanxi         113.1667       39.5667           82       173     2012      04        26        117              0.117583      11.666748       0.000000       0.291437       0.075500       0.357500       0.053200       0.277000
53584     53584     shanxi         113.1667       39.5667           82       173     2012      04        27        118              0.110833      16.226379       0.000000       0.272655       0.071000       0.144400   -9999.000000       0.244000
53584     53584     shanxi         113.1667       39.5667           82       173     2012      04        28        119              0.105750      14.917877       0.000000       0.258626       0.073000       0.089300       0.051100       0.303000
53584     53584     shanxi         113.1667       39.5667           82       173     2012      04        29        120              0.102167      17.417786       0.000000       0.247098       0.067500       0.134400       0.050600   -9999.000000
53584     53584     shanxi         113.1667       39.5667           82       173     2012      04        30        121              0.098417      20.517212       0.484668       0.234881       0.076000       0.094600       0.057200       0.359000
53584     53584     shanxi         113.1667       39.5667           82       173     2012      05        01        122              0.095208      20.799164       0.000000       0.229701       0.074500   -9999.000000       0.065500       0.296000
53584     53584     shanxi         113.1667       39.5667           82       173     2012      05        02        123              0.092458      21.015594       1.013837       0.220491       0.065000   -9999.000000       0.048400       0.208000
53584     53584     shanxi         113.1667       39.5667           82       173     2012      05        03        124              0.089875      21.504608       0.110667       0.207182       0.074000       0.117800       0.062800       0.265000
53584     53584     shanxi         113.1667       39.5667           82       173     2012      05        04        125              0.087625      22.951874       0.698938       0.195499       0.065000   -9999.000000       0.051200   -9999.000000
53584     53584     shanxi         113.1667       39.5667           82       173     2012      05        05        126              0.084708      24.471527       0.480922       0.185526       0.061000       0.080000       0.053200       0.300000
53584     53584     shanxi         113.1667       39.5667           82       173     2012      05        06        127              0.082875      23.582184       1.273761       0.178516       0.065000   -9999.000000       0.054500       0.360000
53584     53584     shanxi         113.1667       39.5667           82       173     2012      05        07        128              0.081125      26.070129       2.739580       0.174405   -9999.000000       0.046700       0.059800       0.222000
53584     53584     shanxi         113.1667       39.5667           82       173     2012      05        08        129              0.081125      25.028381       1.304324       0.201490       0.065000       0.087500       0.047900       0.200000
53584     53584     shanxi         113.1667       39.5667           82       173     2012      05        09        130              0.080042      25.256592       3.217405       0.199079       0.107000   -9999.000000       0.081100       0.874000
53584     53584     shanxi         113.1667       39.5667           82       173     2012      05        10        131              0.081913      20.542358       0.348687       0.236413       0.077000       0.398800       0.056500       0.183000
53584     53584     shanxi         113.1667       39.5667           82       173     2012      05        11        132              0.083333      25.537292       4.054636       0.210417       0.136000   -9999.000000       0.106900       0.712000
53584     53584     shanxi         113.1667       39.5667           82       173     2012      05        12        133              0.088042      18.330109       0.380277       0.247384       0.085500   -9999.000000   -9999.000000       0.467000
53584     53584     shanxi         113.1667       39.5667           82       173     2012      05        13        134              0.088792      18.099304       0.119740       0.228597       0.075500       0.257200       0.054200       0.169000
53584     53584     shanxi         113.1667       39.5667           82       173     2012      05        14        135              0.088667      17.781311       0.000000       0.208859       0.070000   -9999.000000       0.068300       0.170000
53584     53584     shanxi         113.1667       39.5667           82       173     2012      05        15        136              0.088583      17.307251       0.023745       0.195724       0.067000       0.100300       0.052300       0.166000
53584     53584     shanxi         113.1667       39.5667           82       173     2012      05        16        137              0.087792      18.855164       0.000000       0.186876       0.068000       0.040900       0.051400       0.342000
53584     53584     shanxi         113.1667       39.5667           82       173     2012      05        17        138              0.087625      19.972107       0.088558       0.179499       0.064500       0.316400       0.057700       0.441000
53584     53584     shanxi         113.1667       39.5667           82       173     2012      05        18        139              0.086167      24.185150       0.124836       0.171960       0.064500       0.095000       0.066500   -9999.000000
53584     53584     shanxi         113.1667       39.5667           82       173     2012      05        19        140              0.085042      25.529327       0.785826       0.168176       0.076000   -9999.000000       0.057800       0.263000
53584     53584     shanxi         113.1667       39.5667           82       173     2012      05        20        141              0.082583      26.053314       1.861227       0.166846       0.072000   -9999.000000       0.079200       0.309000
53584     53584     shanxi         113.1667       39.5667           82       173     2012      05        21        142              0.081667      22.764343       2.967944       0.190976       0.150000       0.140000       0.094600       0.356000
53584     53584     shanxi         113.1667       39.5667           82       173     2012      05        22        143              0.082583      19.554718       0.718077       0.212320       0.087000   -9999.000000       0.059900       0.433000
53584     53584     shanxi         113.1667       39.5667           82       173     2012      05        23        144              0.082833      20.547546       0.087754       0.205643   -9999.000000       0.199400       0.056800   -9999.000000
53584     53584     shanxi         113.1667       39.5667           82       173     2012      05        24        145              0.083792      20.261658       0.000000       0.186678       0.071000   -9999.000000       0.060300       0.300000
53584     53584     shanxi         113.1667       39.5667           82       173     2012      05        25        146              0.000000      21.804596       0.361638       0.175425       0.084000       0.269700       0.059400       0.305000
53584     53584     shanxi         113.1667       39.5667           82       173     2012      05        26        147              0.084042      20.746582       0.000000       0.174542       0.076000       0.140400       0.065500       0.302000
53584     53584     shanxi         113.1667       39.5667           82       173     2012      05        27        148              0.083875      24.815430       0.226725       0.167360       0.067000   -9999.000000       0.048400       0.337000
53584     53584     shanxi         113.1667       39.5667           82       173     2012      05        28        149              0.082958      26.839508       3.427009       0.161906       0.074500       0.138600       0.058300   -9999.000000
53584     53584     shanxi         113.1667       39.5667           82       173     2012      05        29        150              0.080458      28.194305       1.225869       0.167705       0.110000   -9999.000000   -9999.000000       0.635000
53584     53584     shanxi         113.1667       39.5667           82       173     2012      05        30        151              0.081167      20.507416       0.000000       0.213949       0.080000   -9999.000000       0.053700   -9999.000000
53584     53584     shanxi         113.1667       39.5667           82       173     2012      05        31        152              0.146375      21.116821      24.823891       0.187715   -9999.000000       0.075300   -9999.000000   -9999.000000
53584     53584     shanxi         113.1667       39.5667           82       173     2012      06        01        153              0.192292      17.201202       3.202866       0.310255   -9999.000000   -9999.000000       0.104200       0.750000
53584     53584     shanxi         113.1667       39.5667           82       173     2012      06        02        154              0.177542      19.982300       0.123012       0.301501       0.097500       0.202200       0.084400   -9999.000000
53584     53584     shanxi         113.1667       39.5667           82       173     2012      06        03        155              0.191708      21.854309       7.045003       0.273082       0.132000       0.056600       0.109700       0.428000
53584     53584     shanxi         113.1667       39.5667           82       173     2012      06        04        156              0.178083      20.198792       0.000000       0.301161       0.101000       0.190700       0.094200       0.472000
53584     53584     shanxi         113.1667       39.5667           82       173     2012      06        05        157              0.160542      23.819611       0.000000       0.268121       0.091000       0.069600       0.071500       0.417000
53584     53584     shanxi         113.1667       39.5667           82       173     2012      06        06        158              0.156958      25.591217       1.267508       0.247091       0.100000   -9999.000000       0.097600       0.507000
53584     53584     shanxi         113.1667       39.5667           82       173     2012      06        07        159              0.149958      20.853424       2.368246       0.255006       0.091500   -9999.000000       0.083200       0.354000
53584     53584     shanxi         113.1667       39.5667           82       173     2012      06        08        160              0.137250      22.027802       0.229821       0.241892       0.082500       0.171400       0.073700       0.326000
53584     53584     shanxi         113.1667       39.5667           82       173     2012      06        09        161              0.120792      24.416412       1.004135       0.225627       0.085000   -9999.000000       0.076400       0.457000
53584     53584     shanxi         113.1667       39.5667           82       173     2012      06        10        162              0.108667      22.200806       0.000000       0.222739       0.073000       0.141100       0.066500       0.593000
53584     53584     shanxi         113.1667       39.5667           82       173     2012      06        11        163              0.000000      21.404968       0.247413       0.211406       0.091000   -9999.000000       0.071500       0.317000
53584     53584     shanxi         113.1667       39.5667           82       173     2012      06        12        164              0.094375      22.929688       0.000000       0.196567       0.085000       0.073500       0.070400       0.281000
53584     53584     shanxi         113.1667       39.5667           82       173     2012      06        13        165              0.090417      23.760193       0.270600       0.189284       0.086500       0.022400       0.059100       0.321000
53584     53584     shanxi         113.1667       39.5667           82       173     2012      06        14        166              0.086958      23.333008       0.594815       0.183911       0.092000   -9999.000000       0.067300       0.472000
53584     53584     shanxi         113.1667       39.5667           82       173     2012      06        15        167              0.086000      20.516815       0.000000       0.190210       0.098000   -9999.000000   -9999.000000       0.448000
53584     53584     shanxi         113.1667       39.5667           82       173     2012      06        16        168              0.085500      23.127380       0.459912       0.182788       0.086000   -9999.000000       0.056000   -9999.000000
53584     53584     shanxi         113.1667       39.5667           82       173     2012      06        17        169              0.084333      26.589783       0.266046       0.173785       0.088000   -9999.000000       0.068600       0.370000
53584     53584     shanxi         113.1667       39.5667           82       173     2012      06        18        170              0.082500      29.683075       1.154796       0.168678       0.081000       0.114400       0.054700       0.471000
53584     53584     shanxi         113.1667       39.5667           82       173     2012      06        19        171              0.080500      30.417236       1.368611       0.166330       0.078000   -9999.000000       0.069600       0.526000
53584     53584     shanxi         113.1667       39.5667           82       173     2012      06        20        172              0.079458      26.886505       2.010961       0.180939       0.107000       0.134800       0.061900       0.615000
53584     53584     shanxi         113.1667       39.5667           82       173     2012      06        21        173              0.078167      26.739471       2.068577       0.178102       0.120000   -9999.000000       0.089000   -9999.000000
53584     53584     shanxi         113.1667       39.5667           82       173     2012      06        22        174              0.077708      26.571167       3.647224       0.188272       0.144000   -9999.000000       0.085500       0.491000
53584     53584     shanxi         113.1667       39.5667           82       173     2012      06        23        175              0.078208      26.598877       6.737401       0.215595       0.123000       0.215400       0.107700       0.541000
53584     53584     shanxi         113.1667       39.5667           82       173     2012      06        24        176              0.078917      27.418304       1.143662       0.245338       0.138000   -9999.000000       0.075000       0.894000
53584     53584     shanxi         113.1667       39.5667           82       173     2012      06        25        177              0.080500      24.384888       0.000000       0.253876       0.117000   -9999.000000       0.085000       0.535000
53584     53584     shanxi         113.1667       39.5667           82       173     2012      06        26        178              0.081125      27.272064       0.561213       0.222672       0.116500       0.100900   -9999.000000   -9999.000000
53584     53584     shanxi         113.1667       39.5667           82       173     2012      06        27        179              0.082083      26.845093      15.125147       0.206708   -9999.000000   -9999.000000       0.127400       0.539000
53584     53584     shanxi         113.1667       39.5667           82       173     2012      06        28        180              0.167292      24.211212      12.221045       0.232754       0.186000       0.259000       0.123300       1.000000
53584     53584     shanxi         113.1667       39.5667           82       173     2012      06        29        181              0.184458      21.001587       0.319700       0.322112       0.136000   -9999.000000       0.096400       1.000000
53584     53584     shanxi         113.1667       39.5667           82       173     2012      06        30        182              0.163125      24.262146       0.408205       0.298227       0.100000       0.239500       0.074400   -9999.000000
53584     53584     shanxi         113.1667       39.5667           82       173     2012      07        01        183              0.139500      26.281219       0.000000       0.269597       0.102000       0.229200       0.071500   -9999.000000
53584     53584     shanxi         113.1667       39.5667           82       173     2012      07        02        184              0.113167      27.588745       0.360219       0.246722       0.130000   -9999.000000   -9999.000000       0.541000
53584     53584     shanxi         113.1667       39.5667           82       173     2012      07        03        185              0.099417      27.153717       0.828492       0.228028       0.125000       0.212300       0.066600       0.611000
53584     53584     shanxi         113.1667       39.5667           82       173     2012      07        04        186              0.093458      28.020538       0.744322       0.220346       0.111000   -9999.000000       0.078900       0.514000
53584     53584     shanxi         113.1667       39.5667           82       173     2012      07        05        187              0.127375      27.344025       2.898300       0.212455       0.104000   -9999.000000       0.059500       0.654000
53584     53584     shanxi         113.1667       39.5667           82       173     2012      07        06        188              0.149333      28.790100       0.000000       0.224632   -9999.000000       0.299800       0.066600       0.563000
53584     53584     shanxi         113.1667       39.5667           82       173     2012      07        07        189              0.124292      29.931702       0.000000       0.210566   -9999.000000   -9999.000000       0.071000       0.470000
53584     53584     shanxi         113.1667       39.5667           82       173     2012      07        08        190              0.109043      27.546143       9.168685       0.197748       0.151000       0.123000       0.089700       0.845000
53584     53584     shanxi         113.1667       39.5667           82       173     2012      07        09        191              0.122917      27.409698       4.464735       0.244968       0.125000       0.279000       0.105200       0.947000
53584     53584     shanxi         113.1667       39.5667           82       173     2012      07        10        192              0.144500      27.433563       1.153550       0.271833       0.122000       0.302300       0.130200       0.885000
53584     53584     shanxi         113.1667       39.5667           82       173     2012      07        11        193              0.118875      26.800232       0.558258       0.259434       0.117000       0.264900       0.083300       0.726000
53584     53584     shanxi         113.1667       39.5667           82       173     2012      07        12        194              0.102500      27.947021       1.090824       0.236322       0.151000   -9999.000000       0.104600       0.769000
53584     53584     shanxi         113.1667       39.5667           82       173     2012      07        13        195              0.096583      25.829803       3.180756       0.233482       0.155000       0.302800   -9999.000000       0.630000
53584     53584     shanxi         113.1667       39.5667           82       173     2012      07        14        196              0.093083      27.482819       6.662785       0.231760       0.166500       0.094400       0.096900       0.764000
53584     53584     shanxi         113.1667       39.5667           82       173     2012      07        15        197              0.092167      23.640015       0.363615       0.277923       0.133000   -9999.000000       0.103100   -9999.000000
53584     53584     shanxi         113.1667       39.5667           82       173     2012      07        16        198              0.090375      27.071594       0.878665       0.242282       0.119000       0.153100       0.085100       0.623000
53584     53584     shanxi         113.1667       39.5667           82       173     2012      07        17        199              0.088417      27.246002       0.000000       0.227492       0.128000   -9999.000000       0.082200       0.513000
53584     53584     shanxi         113.1667       39.5667           82       173     2012      07        18        200              0.086833      27.504425       0.000000       0.208829       0.139000   -9999.000000       0.090200       0.516000
53584     53584     shanxi         113.1667       39.5667           82       173     2012      07        19        201              0.085292      28.203583       0.000000       0.196672       0.135000       0.212400       0.098800       0.536000
53584     53584     shanxi         113.1667       39.5667           82       173     2012      07        20        202              0.083826      28.704041       3.574878       0.187004       0.113000   -9999.000000       0.087000   -9999.000000
53584     53584     shanxi         113.1667       39.5667           82       173     2012      07        21        203              0.227000      30.593048      96.942482       0.187344   -9999.000000       0.256100       0.147100       1.000000
53584     53584     shanxi         113.1667       39.5667           82       173     2012      07        22        204              0.212250      21.455139       0.000000       0.402036       0.217000   -9999.000000       0.140200       0.911000
53584     53584     shanxi         113.1667       39.5667           82       173     2012      07        23        205              0.195750      24.262421       0.319673       0.343814       0.173500   -9999.000000       0.141900       0.898000
53584     53584     shanxi         113.1667       39.5667           82       173     2012      07        24        206              0.182125      24.325958       1.097584       0.328271       0.178000       0.278300       0.114000       0.747000
53584     53584     shanxi         113.1667       39.5667           82       173     2012      07        25        207              0.193958      26.520782       6.634975       0.318688       0.196000   -9999.000000       0.138500   -9999.000000
53584     53584     shanxi         113.1667       39.5667           82       173     2012      07        26        208              0.184042      24.715698       0.693915       0.333210       0.195500       0.336000       0.122200       0.972000
53584     53584     shanxi         113.1667       39.5667           82       173     2012      07        27        209              0.172708      26.699615       6.435054       0.317667       0.202000       0.253200       0.134700       0.815000
53584     53584     shanxi         113.1667       39.5667           82       173     2012      07        28        210              0.171500      26.455963       0.326350       0.315309       0.189000   -9999.000000       0.116100       1.000000
53584     53584     shanxi         113.1667       39.5667           82       173     2012      07        29        211              0.157208      26.692078       0.420322       0.318314       0.180000       0.291500       0.113200       0.706000
53584     53584     shanxi         113.1667       39.5667           82       173     2012      07        30        212              0.212583      26.866455      53.975529       0.301079       0.219000   -9999.000000   -9999.000000   -9999.000000
53584     53584     shanxi         113.1667       39.5667           82       173     2012      07        31        213              0.229708      21.547791       2.663322       0.377270       0.211000       0.172100       0.146900       1.000000
53584     53584     shanxi         113.1667       39.5667           82       173     2012      08        01        214              0.211000      21.880920       1.725255       0.359800       0.247000       0.273700       0.159600       0.868000
53584     53584     shanxi         113.1667       39.5667           82       173     2012      08        02        215              0.197292      23.536163       1.107483       0.339360       0.226000   -9999.000000       0.146200       0.977000
53584     53584     shanxi         113.1667       39.5667           82       173     2012      08        03        216              0.183250      26.222809       3.729462       0.326681       0.226000       0.266900       0.132100       0.727000
53584     53584     shanxi         113.1667       39.5667           82       173     2012      08        04        217              0.169500      27.161957       0.000000       0.316099       0.206000   -9999.000000       0.128200       0.800000
53584     53584     shanxi         113.1667       39.5667           82       173     2012      08        05        218              0.156042      27.488708       0.000000       0.306839       0.172000   -9999.000000       0.131100       0.625000
53584     53584     shanxi         113.1667       39.5667           82       173     2012      08        06        219              0.141500      27.260132       1.174381       0.298770       0.193500       0.242300       0.122300       0.636000
53584     53584     shanxi         113.1667       39.5667           82       173     2012      08        07        220              0.129083      27.510437       0.887613       0.291334       0.188000   -9999.000000   -9999.000000       0.833000
53584     53584     shanxi         113.1667       39.5667           82       173     2012      08        08        221              0.118083      27.675873       4.809825       0.288056       0.192000       0.117100       0.119200       0.660000
53584     53584     shanxi         113.1667       39.5667           82       173     2012      08        09        222              0.107792      25.151489       0.250559       0.285319       0.183000   -9999.000000       0.123000       0.681000
53584     53584     shanxi         113.1667       39.5667           82       173     2012      08        10        223              0.098708      26.539673       0.148705       0.274810       0.159000       0.284900       0.119000       0.519000
53584     53584     shanxi         113.1667       39.5667           82       173     2012      08        11        224              0.104667      25.769806      12.311356       0.268005       0.272000       0.081800       0.150500       0.740000
53584     53584     shanxi         113.1667       39.5667           82       173     2012      08        12        225              0.148792      20.649780       0.312798       0.314564       0.213000       0.187000       0.144100       0.842000
53584     53584     shanxi         113.1667       39.5667           82       173     2012      08        13        226              0.139458      24.180420       0.800346       0.302841       0.200000       0.211800       0.136300   -9999.000000
53584     53584     shanxi         113.1667       39.5667           82       173     2012      08        14        227              0.141750      24.420990       4.251820       0.291361       0.223000   -9999.000000       0.141300       0.968000
53584     53584     shanxi         113.1667       39.5667           82       173     2012      08        15        228              0.146708      22.368500       0.000000       0.306887       0.203000       0.385500       0.133800       0.859000
53584     53584     shanxi         113.1667       39.5667           82       173     2012      08        16        229              0.134375      22.932434       0.254350       0.290621       0.166500       0.232300   -9999.000000       0.809000
53584     53584     shanxi         113.1667       39.5667           82       173     2012      08        17        230              0.121333      24.348633       0.512618       0.280859       0.191000       0.328000       0.119600       0.762000
53584     53584     shanxi         113.1667       39.5667           82       173     2012      08        18        231              0.112833      23.711273       0.155961       0.278683       0.185000   -9999.000000       0.144900   -9999.000000
53584     53584     shanxi         113.1667       39.5667           82       173     2012      08        19        232              0.103417      22.020172       3.357835       0.276240       0.156000       0.212700       0.111100       0.670000
53584     53584     shanxi         113.1667       39.5667           82       173     2012      08        20        233              0.097083      24.735107       0.640323       0.269799       0.175000       0.204200       0.124200       0.645000
53584     53584     shanxi         113.1667       39.5667           82       173     2012      08        21        234              0.092750      22.338318       0.000000       0.282662       0.141500       0.187500       0.123000       0.627000
53584     53584     shanxi         113.1667       39.5667           82       173     2012      08        22        235              0.088833      20.122345       0.000000       0.264920       0.144000       0.392700       0.132300   -9999.000000
53584     53584     shanxi         113.1667       39.5667           82       173     2012      08        23        236              0.086125      20.984680       0.000000       0.256358       0.153000   -9999.000000       0.117400   -9999.000000
53584     53584     shanxi         113.1667       39.5667           82       173     2012      08        24        237              0.084042      22.087280       0.000000       0.249599       0.148000       0.166300       0.141600       0.622000
53584     53584     shanxi         113.1667       39.5667           82       173     2012      08        25        238              0.000000      23.297058       3.230069       0.241889       0.196000       0.165700       0.118500       0.686000
53584     53584     shanxi         113.1667       39.5667           82       173     2012      08        26        239              0.081417      24.571259       0.624478       0.235016       0.184000       0.102200       0.126500       0.648000
53584     53584     shanxi         113.1667       39.5667           82       173     2012      08        27        240              0.080500      25.094360       1.418146       0.229631       0.194000   -9999.000000   -9999.000000       0.697000
53584     53584     shanxi         113.1667       39.5667           82       173     2012      08        28        241              0.080000      23.059784       0.000000       0.232499       0.167000       0.103200       0.103900   -9999.000000
53584     53584     shanxi         113.1667       39.5667           82       173     2012      08        29        242              0.079500      24.552338       0.000000       0.223942       0.164000       0.213800       0.120300       0.576000
53584     53584     shanxi         113.1667       39.5667           82       173     2012      08        30        243              0.078167      25.513367       0.156744       0.213245       0.182000   -9999.000000       0.117700       0.660000
53584     53584     shanxi         113.1667       39.5667           82       173     2012      08        31        244              0.076667      25.681915       0.274659       0.206451       0.180000       0.044300       0.103600       0.557000
53584     53584     shanxi         113.1667       39.5667           82       173     2012      09        01        245              0.139417      24.732697      38.451305       0.205570       0.221000       0.000900       0.144200       1.000000
53584     53584     shanxi         113.1667       39.5667           82       173     2012      09        02        246              0.183042      18.657928       0.434509       0.335928       0.217000       0.209800   -9999.000000       0.950000
53584     53584     shanxi         113.1667       39.5667           82       173     2012      09        03        247              0.166333      18.525909       0.246902       0.322997       0.204000       0.300200       0.114400       0.758000
53584     53584     shanxi         113.1667       39.5667           82       173     2012      09        04        248              0.156375      16.053558       0.000000       0.305778       0.134000       0.431200       0.138400       0.703000
53584     53584     shanxi         113.1667       39.5667           82       173     2012      09        05        249              0.147417      17.362640       0.000000       0.294581       0.185000       0.160200       0.112000       0.759000
53584     53584     shanxi         113.1667       39.5667           82       173     2012      09        06        250              0.179292      19.726868      17.071012       0.286190       0.170000       0.224700       0.119700       0.970000
53584     53584     shanxi         113.1667       39.5667           82       173     2012      09        07        251              0.194792      19.298462       0.087114       0.323587       0.156000   -9999.000000       0.138200       0.753000
53584     53584     shanxi         113.1667       39.5667           82       173     2012      09        08        252              0.178917      19.838470       0.000000       0.316414       0.146000       0.218000       0.123900       0.708000
53584     53584     shanxi         113.1667       39.5667           82       173     2012      09        09        253              0.167750      20.759491       0.000000       0.302332       0.141000   -9999.000000       0.109000       0.740000
53584     53584     shanxi         113.1667       39.5667           82       173     2012      09        10        254              0.158000      21.600952       0.097755       0.291942       0.190000   -9999.000000       0.118700       0.803000
53584     53584     shanxi         113.1667       39.5667           82       173     2012      09        11        255              0.149292      20.322784       0.257079       0.288157       0.137000       0.210100       0.100000   -9999.000000
53584     53584     shanxi         113.1667       39.5667           82       173     2012      09        12        256              0.139458      18.342194       0.000000       0.283529       0.131000       0.210000       0.109400       0.482000
53584     53584     shanxi         113.1667       39.5667           82       173     2012      09        13        257              0.132167      14.317352       0.404292       0.279921       0.130000       0.183500   -9999.000000       0.693000
53584     53584     shanxi         113.1667       39.5667           82       173     2012      09        14        258              0.130000      14.795837       0.000000       0.279112       0.127000   -9999.000000       0.091100       0.749000
53584     53584     shanxi         113.1667       39.5667           82       173     2012      09        15        259              0.127792      15.889923       0.000000       0.273829       0.147000       0.101700       0.112300       0.602000
53584     53584     shanxi         113.1667       39.5667           82       173     2012      09        16        260              0.125167      17.162018       0.000000       0.268568       0.148000       0.258000       0.092100   -9999.000000
53584     53584     shanxi         113.1667       39.5667           82       173     2012      09        17        261              0.121667      18.078094       0.000000       0.264608       0.126000   -9999.000000       0.084300       0.527000
53584     53584     shanxi         113.1667       39.5667           82       173     2012      09        18        262              0.119167      17.826935       0.274664       0.262274       0.124000       0.118800       0.090800       0.566000
53584     53584     shanxi         113.1667       39.5667           82       173     2012      09        19        263              0.117208      18.598358       0.486019       0.258582       0.130000   -9999.000000       0.096700       0.597000
53584     53584     shanxi         113.1667       39.5667           82       173     2012      09        20        264              0.115208      18.599182       2.314425       0.256025       0.120000   -9999.000000       0.085800       0.584000
53584     53584     shanxi         113.1667       39.5667           82       173     2012      09        21        265              0.119042      19.295624       1.670727       0.258051   -9999.000000       0.236600       0.111100   -9999.000000
53584     53584     shanxi         113.1667       39.5667           82       173     2012      09        22        266              0.126130      16.445404       0.000000       0.280423       0.114000       0.395200       0.094800       0.673000
53584     53584     shanxi         113.1667       39.5667           82       173     2012      09        23        267              0.124625      18.969635       0.397372       0.266500       0.106500       0.143200       0.096400       0.583000
53584     53584     shanxi         113.1667       39.5667           82       173     2012      09        24        268              0.121542      18.672974       0.534824       0.260781       0.113000       0.125900       0.090000       0.548000
53584     53584     shanxi         113.1667       39.5667           82       173     2012      09        25        269              0.167750      19.258606      10.962097       0.258262   -9999.000000   -9999.000000       0.107200       0.923000
53584     53584     shanxi         113.1667       39.5667           82       173     2012      09        26        270              0.173167      13.632629       0.688168       0.313807       0.147000       0.311800       0.105300   -9999.000000
53584     53584     shanxi         113.1667       39.5667           82       173     2012      09        27        271              0.165714      15.425018       0.184659       0.295468   -9999.000000   -9999.000000       0.120500       0.731000
53584     53584     shanxi         113.1667       39.5667           82       173     2012      09        28        272              0.153600      12.988190       0.000000       0.284486       0.110000   -9999.000000       0.092800       0.525000
53584     53584     shanxi         113.1667       39.5667           82       173     2012      09        29        273              0.149500      12.694519       0.000000       0.277205       0.114000   -9999.000000       0.104800       0.672000
53584     53584     shanxi         113.1667       39.5667           82       173     2012      09        30        274              0.144000      13.360443       0.000000       0.271866       0.113000   -9999.000000   -9999.000000       0.395000
53584     53584     shanxi         113.1667       39.5667           82       173     2012      10        01        275              0.139292      14.300720       0.234782       0.267184       0.092000   -9999.000000       0.073500       0.379000
53584     53584     shanxi         113.1667       39.5667           82       173     2012      10        02        276              0.135042      15.198822       0.000000       0.263257       0.104000   -9999.000000       0.089800       0.497000
53584     53584     shanxi         113.1667       39.5667           82       173     2012      10        03        277              0.130292      16.387451       0.000000       0.258691       0.097000       0.066600       0.079500       0.689000
53584     53584     shanxi         113.1667       39.5667           82       173     2012      10        04        278              0.129292      14.982178       0.204458       0.253960       0.119000       0.126300       0.091200       0.888000
53584     53584     shanxi         113.1667       39.5667           82       173     2012      10        05        279              0.138708      11.333099       0.000000       0.257880       0.133000       0.331300       0.099300       0.573000
53584     53584     shanxi         113.1667       39.5667           82       173     2012      10        06        280              0.136167      12.672394       0.000000       0.257268       0.117000       0.140700       0.096200       0.617000
53584     53584     shanxi         113.1667       39.5667           82       173     2012      10        07        281              0.132083      14.293030       0.716913       0.252842       0.108000   -9999.000000       0.080000       0.548000
53584     53584     shanxi         113.1667       39.5667           82       173     2012      10        08        282              0.129250      14.568726       0.529591       0.251238       0.132000       0.444100       0.099900       0.534000
53584     53584     shanxi         113.1667       39.5667           82       173     2012      10        09        283              0.124167      16.109528       0.000000       0.248597       0.106000       0.236500       0.077500       0.523000
53584     53584     shanxi         113.1667       39.5667           82       173     2012      10        10        284              0.121208      11.513580       0.000000       0.245054       0.112500   -9999.000000       0.087400   -9999.000000
53584     53584     shanxi         113.1667       39.5667           82       173     2012      10        11        285              0.119042      11.588470       0.000000       0.243114       0.089000       0.265400       0.084000       0.432000
53584     53584     shanxi         113.1667       39.5667           82       173     2012      10        12        286              0.116583      13.521606       0.000000       0.240125       0.083000       0.048500       0.079200       0.399000
53584     53584     shanxi         113.1667       39.5667           82       173     2012      10        13        287              0.113250      13.964874       0.000000       0.235860       0.092000       0.159400       0.079000       0.454000
53584     53584     shanxi         113.1667       39.5667           82       173     2012      10        14        288              0.110708      11.293823       0.000000       0.233570       0.088000   -9999.000000       0.089900       0.503000
53584     53584     shanxi         113.1667       39.5667           82       173     2012      10        15        289              0.116000      11.500000       0.371482       0.234339       0.090000   -9999.000000       0.075800   -9999.000000
53584     53584     shanxi         113.1667       39.5667           82       173     2012      10        16        290              0.165625      11.324463       0.000000       0.239468       0.147000   -9999.000000       0.121400       0.871000
53584     53584     shanxi         113.1667       39.5667           82       173     2012      10        17        291              0.154625       7.892181       0.000000       0.238348       0.122000   -9999.000000   -9999.000000       0.598000
53584     53584     shanxi         113.1667       39.5667           82       173     2012      10        18        292              0.149250       7.998779       0.000000       0.235487   -9999.000000       0.318600       0.072700       0.638000
53584     53584     shanxi         113.1667       39.5667           82       173     2012      10        19        293              0.144167       8.503082       0.000000       0.235133   -9999.000000       0.188500       0.088200       0.502000
53584     53584     shanxi         113.1667       39.5667           82       173     2012      10        20        294              0.140958      10.603424       0.000000       0.233367       0.097500   -9999.000000       0.080900   -9999.000000
53584     53584     shanxi         113.1667       39.5667           82       173     2012      10        21        295              0.167458      12.196259       0.237217       0.232219   -9999.000000       0.098700       0.093500       0.684000
53584     53584     shanxi         113.1667       39.5667           82       173     2012      10        22        296              0.172375       7.039612       0.000000       0.237162   -9999.000000       0.325800       0.105300       0.688000
53584     53584     shanxi         113.1667       39.5667           82       173     2012      10        23        297              0.164458       8.409058       0.000000       0.235083   -9999.000000   -9999.000000       0.083800       0.699000
53584     53584     shanxi         113.1667       39.5667           82       173     2012      10        24        298              0.158250      10.071381       0.000000       0.232999   -9999.000000       0.316900       0.070900       0.514000
53584     53584     shanxi         113.1667       39.5667           82       173     2012      10        25        299              0.000000      10.700592       0.000000       0.230657       0.086000   -9999.000000       0.084400   -9999.000000
53584     53584     shanxi         113.1667       39.5667           82       173     2012      10        26        300              0.148583      10.966095       0.000000       0.229092       0.093500       0.195100       0.081800       0.495000
53584     53584     shanxi         113.1667       39.5667           82       173     2012      10        27        301              0.144833       9.802368       0.000000       0.230691       0.091000       0.250600       0.089100       0.436000
53584     53584     shanxi         113.1667       39.5667           82       173     2012      10        28        302              0.000000       9.299377       0.000000       0.230306       0.077000   -9999.000000   -9999.000000       0.415000
53584     53584     shanxi         113.1667       39.5667           82       173     2012      10        29        303              0.137625      10.093750       0.580997       0.229500   -9999.000000       0.294800       0.064000       0.279000
53584     53584     shanxi         113.1667       39.5667           82       173     2012      10        30        304              0.133333       6.098206       0.220757       0.221647   -9999.000000   -9999.000000       0.073700       0.283000
53584     53584     shanxi         113.1667       39.5667           82       173     2012      10        31        305              0.131250       5.023682       0.000000       0.221486       0.080000   -9999.000000       0.059600       0.300000
53584     53584     shanxi         113.1667       39.5667           82       173     2012      11        01        306              0.130333       5.737732       0.000000       0.225397       0.083000       0.301400       0.068500       0.329000
53584     53584     shanxi         113.1667       39.5667           82       173     2012      11        02        307              0.129125       6.974487       0.000000       0.227944       0.084000   -9999.000000       0.076500       0.505000
53584     53584     shanxi         113.1667       39.5667           82       173     2012      11        03        308              0.132917       8.952484       0.000000       0.227267   -9999.000000   -9999.000000   -9999.000000       0.490000
53584     53584     shanxi         113.1667       39.5667           82       173     2012      11        04        309              0.153125       1.599243       0.000000       0.199725   -9999.000000   -9999.000000       0.048500       0.374000
53584     53584     shanxi         113.1667       39.5667           82       173     2012      11        05        310              0.174083      -1.340790       0.000000       0.173834   -9999.000000   -9999.000000       0.060700       0.368000
53584     53584     shanxi         113.1667       39.5667           82       173     2012      11        06        311              0.181625      -0.947083       0.000000       0.179229       0.106000       0.078400       0.065400       0.490000
53584     53584     shanxi         113.1667       39.5667           82       173     2012      11        07        312              0.186042       0.648621       0.872607       0.195449   -9999.000000   -9999.000000       0.074400       0.370000
53584     53584     shanxi         113.1667       39.5667           82       173     2012      11        08        313              0.184750       1.906036       0.000000       0.210280   -9999.000000   -9999.000000   -9999.000000   -9999.000000
53584     53584     shanxi         113.1667       39.5667           82       173     2012      11        09        314              0.184792       2.658417       1.300374       0.213503   -9999.000000       0.149300       0.077500       0.554000
53584     53584     shanxi         113.1667       39.5667           82       173     2012      11        10        315              0.182042       4.039734       0.000000       0.233737   -9999.000000       0.181100       0.044400       0.315000
53584     53584     shanxi         113.1667       39.5667           82       173     2012      11        11        316              0.155875       0.277985       0.000000       0.198814   -9999.000000       0.096200       0.054800       0.405000
53584     53584     shanxi         113.1667       39.5667           82       173     2012      11        12        317              0.138750      -1.092346       0.000000       0.177793   -9999.000000   -9999.000000       0.049200       0.256000
53584     53584     shanxi         113.1667       39.5667           82       173     2012      11        13        318              0.000000      -0.327362       0.000000       0.185450   -9999.000000       0.097200       0.058600   -9999.000000
53584     53584     shanxi         113.1667       39.5667           82       173     2012      11        14        319              0.104292      -1.042603       0.000000       0.179232   -9999.000000       0.069100   -9999.000000       0.325000
53584     53584     shanxi         113.1667       39.5667           82       173     2012      11        15        320              0.109708      -0.454651       2.161853       0.182426   -9999.000000   -9999.000000       0.045900       0.292000
53584     53584     shanxi         113.1667       39.5667           82       173     2012      11        16        321              0.140375       0.535278       0.000000       0.193595   -9999.000000   -9999.000000       0.050700       0.166000
53584     53584     shanxi         113.1667       39.5667           82       173     2012      11        17        322              0.000000      -1.273834       0.000000       0.180305       0.092000   -9999.000000       0.050700       0.222000
53584     53584     shanxi         113.1667       39.5667           82       173     2012      11        18        323              0.138708      -0.690704       0.000000       0.180459   -9999.000000       0.185400       0.058800   -9999.000000
53584     53584     shanxi         113.1667       39.5667           82       173     2012      11        19        324              0.131042       0.225098       0.000000       0.192117   -9999.000000       0.096100       0.059600       0.362000
53584     53584     shanxi         113.1667       39.5667           82       173     2012      11        20        325              0.132667       0.062103       0.000000       0.190012   -9999.000000   -9999.000000       0.058300       0.283000
53584     53584     shanxi         113.1667       39.5667           82       173     2012      11        21        326              0.154792       0.889374       0.000000       0.200402   -9999.000000   -9999.000000       0.048200       0.556000
53584     53584     shanxi         113.1667       39.5667           82       173     2012      11        22        327              0.160333       2.562683       0.000000       0.223402   -9999.000000   -9999.000000       0.059600       0.300000
53584     53584     shanxi         113.1667       39.5667           82       173     2012      11        23        328              0.105917      -0.830963       0.000000       0.188973   -9999.000000       0.138200       0.050800   -9999.000000
53584     53584     shanxi         113.1667       39.5667           82       173     2012      11        24        329              0.094750      -1.905884       0.000000       0.171684   -9999.000000       0.086700       0.063000       0.235000
53584     53584     shanxi         113.1667       39.5667           82       173     2012      11        25        330              0.093000       0.025574       0.000000       0.186649   -9999.000000   -9999.000000       0.060000       0.226000
53584     53584     shanxi         113.1667       39.5667           82       173     2012      11        26        331              0.088917      -1.478790       0.224944       0.176599   -9999.000000   -9999.000000   -9999.000000       0.204000
53584     53584     shanxi         113.1667       39.5667           82       173     2012      11        27        332              0.090542      -1.503296       0.000000       0.171836   -9999.000000       0.137200       0.051700       0.077000
53584     53584     shanxi         113.1667       39.5667           82       173     2012      11        28        333              0.086917      -0.442902       0.000000       0.186904   -9999.000000       0.158600       0.057200       0.068000
53584     53584     shanxi         113.1667       39.5667           82       173     2012      11        29        334              0.085625      -3.540710       0.000000       0.157214   -9999.000000       0.058500       0.044700       0.014000
53584     53584     shanxi         113.1667       39.5667           82       173     2012      11        30        335              0.084583      -3.235535       0.000000       0.160084   -9999.000000   -9999.000000       0.056400       0.012000
53584     53584     shanxi         113.1667       39.5667           82       173     2012      12        01        336              0.084292      -4.485107       0.000000       0.147946   -9999.000000       0.153300   -9999.000000       0.110000
53584     53584     shanxi         113.1667       39.5667           82       173     2012      12        02        337              0.085917      -3.428314       0.000000       0.149855   -9999.000000       0.093900       0.045900       0.093000
53584     53584     shanxi         113.1667       39.5667           82       173     2012      12        03        338              0.083708      -2.281769       0.000000       0.162963   -9999.000000       0.169800       0.060900       0.010000
53584     53584     shanxi         113.1667       39.5667           82       173     2012      12        04        339              0.083333      -5.252319       0.000000       0.144509   -9999.000000   -9999.000000       0.051300       0.069000
53584     53584     shanxi         113.1667       39.5667           82       173     2012      12        05        340              0.081833      -4.470642       0.000000       0.147091   -9999.000000   -9999.000000       0.046400       0.012000
53584     53584     shanxi         113.1667       39.5667           82       173     2012      12        06        341              0.082167      -7.475250       0.000000       0.132951   -9999.000000       0.145500       0.054600       0.025000
53584     53584     shanxi         113.1667       39.5667           82       173     2012      12        07        342              0.081625      -5.856567       0.000000       0.132969   -9999.000000   -9999.000000       0.053600   -9999.000000
53584     53584     shanxi         113.1667       39.5667           82       173     2012      12        08        343              0.079792      -7.747009       0.000000       0.132573   -9999.000000   -9999.000000       0.047300       0.040000
53584     53584     shanxi         113.1667       39.5667           82       173     2012      12        09        344              0.080125     -10.256134       0.000000       0.127818   -9999.000000   -9999.000000       0.057800       0.153000
53584     53584     shanxi         113.1667       39.5667           82       173     2012      12        10        345              0.080292      -7.916321       0.000000       0.127447   -9999.000000   -9999.000000       0.046300       0.140000
53584     53584     shanxi         113.1667       39.5667           82       173     2012      12        11        346              0.080292      -6.946960       0.000000       0.133305   -9999.000000   -9999.000000       0.052200       0.060000
53584     53584     shanxi         113.1667       39.5667           82       173     2012      12        12        347              0.080250      -6.923828       0.000000       0.131564   -9999.000000   -9999.000000   -9999.000000   -9999.000000
53584     53584     shanxi         113.1667       39.5667           82       173     2012      12        13        348              0.080667      -6.631378       0.000000       0.136389   -9999.000000   -9999.000000       0.046400       0.002000
53584     53584     shanxi         113.1667       39.5667           82       173     2012      12        14        349              0.082500      -6.745575       0.000000       0.130686   -9999.000000   -9999.000000       0.047900       0.055000
53584     53584     shanxi         113.1667       39.5667           82       173     2012      12        15        350              0.000000      -4.644928       0.000000       0.137997   -9999.000000   -9999.000000       0.050800       0.040000
53584     53584     shanxi         113.1667       39.5667           82       173     2012      12        16        351              0.084167      -2.601685       0.000000       0.160244   -9999.000000   -9999.000000       0.047700       0.152000
53584     53584     shanxi         113.1667       39.5667           82       173     2012      12        17        352              0.081292      -2.583954       0.000000       0.165572   -9999.000000       0.062400       0.047100   -9999.000000
53584     53584     shanxi         113.1667       39.5667           82       173     2012      12        18        353              0.080458      -7.095520       0.000000       0.138360   -9999.000000   -9999.000000   -9999.000000       0.043000
53584     53584     shanxi         113.1667       39.5667           82       173     2012      12        19        354              0.080917      -7.714447       0.000000       0.127926   -9999.000000   -9999.000000       0.036500       0.021000
53584     53584     shanxi         113.1667       39.5667           82       173     2012      12        20        355              0.000000      -6.356842       0.000000       0.135231   -9999.000000   -9999.000000       0.048600       0.024000
53584     53584     shanxi         113.1667       39.5667           82       173     2012      12        21        356              0.081083      -6.623016       0.000000       0.131744   -9999.000000       0.118800       0.039100       0.056000
53584     53584     shanxi         113.1667       39.5667           82       173     2012      12        22        357              0.078917      -7.650635       0.000000       0.131306   -9999.000000   -9999.000000       0.039400   -9999.000000
53584     53584     shanxi         113.1667       39.5667           82       173     2012      12        23        358              0.076583     -11.956818       0.000000       0.127137   -9999.000000   -9999.000000   -9999.000000       0.072000
53584     53584     shanxi         113.1667       39.5667           82       173     2012      12        24        359              0.076200     -13.991852       0.000000       0.121534   -9999.000000   -9999.000000       0.048900       0.072000
53584     53584     shanxi         113.1667       39.5667           82       173     2012      12        25        360              0.000000     -12.046143       0.000000       0.122200   -9999.000000   -9999.000000       0.044200       0.219000
53584     53584     shanxi         113.1667       39.5667           82       173     2012      12        26        361              0.000000     -10.897644       0.000000       0.122841   -9999.000000   -9999.000000       0.053500       0.141000
53584     53584     shanxi         113.1667       39.5667           82       173     2012      12        27        362              0.080333      -8.783875       0.000000       0.124879   -9999.000000   -9999.000000       0.036500       0.153000
53584     53584     shanxi         113.1667       39.5667           82       173     2012      12        28        363              0.000000      -7.384552       0.000000       0.128048   -9999.000000   -9999.000000       0.040000       0.104000
53584     53584     shanxi         113.1667       39.5667           82       173     2012      12        29        364              0.000000      -8.420715       0.000000       0.125638   -9999.000000   -9999.000000   -9999.000000       0.116000
53584     53584     shanxi         113.1667       39.5667           82       173     2012      12        30        365              0.000000     -11.375000       0.000000       0.124855   -9999.000000   -9999.000000       0.038000       0.048000
53584     53584     shanxi         113.1667       39.5667           82       173     2012      12        31        366              0.079600     -10.313751       0.000000       0.124768   -9999.000000   -9999.000000       0.048100   -9999.000000
