# Supplementary material for: Research on Fusing Multisatellite Soil Moisture Data Based on Bayesian Model Averaging
Source: Hindawi journal article supplement (doi:10.1155/2018/9310838), 2018-06-25
Supplement: f1 [file 9310838.f1.zip › 2012_sm00-10cm_daily_ZDB_ZHY_53585_366days_allin.txt]

53585     53585     shanxi         113.2500       39.1667           83       173     2012      01        01        001              0.000000   -9999.000000       0.000000   -9999.000000   -9999.000000   -9999.000000       0.031300   -9999.000000
53585     53585     shanxi         113.2500       39.1667           83       173     2012      01        02        002              0.083333      -6.812775       0.396845       0.114460   -9999.000000   -9999.000000       0.037100       0.122000
53585     53585     shanxi         113.2500       39.1667           83       173     2012      01        03        003              0.000000      -9.664520       0.000000       0.108710   -9999.000000   -9999.000000   -9999.000000       0.096000
53585     53585     shanxi         113.2500       39.1667           83       173     2012      01        04        004              0.080542     -11.921844       0.000000       0.105892   -9999.000000   -9999.000000       0.036100   -9999.000000
53585     53585     shanxi         113.2500       39.1667           83       173     2012      01        05        005              0.080292     -10.935150       0.000000       0.104861   -9999.000000   -9999.000000       0.043100       0.005000
53585     53585     shanxi         113.2500       39.1667           83       173     2012      01        06        006              0.080500      -9.873413       0.000000       0.107127   -9999.000000   -9999.000000       0.036600       0.005000
53585     53585     shanxi         113.2500       39.1667           83       173     2012      01        07        007              0.080917      -9.358154       0.273149       0.106200   -9999.000000   -9999.000000       0.037000       0.075000
53585     53585     shanxi         113.2500       39.1667           83       173     2012      01        08        008              0.000000      -7.309357       0.000000       0.111990   -9999.000000   -9999.000000       0.035700       0.013000
53585     53585     shanxi         113.2500       39.1667           83       173     2012      01        09        009              0.081292      -7.313721       0.000000       0.115226   -9999.000000   -9999.000000   -9999.000000   -9999.000000
53585     53585     shanxi         113.2500       39.1667           83       173     2012      01        10        010              0.081125      -6.927979       0.000000       0.117239   -9999.000000   -9999.000000       0.028600       0.045000
53585     53585     shanxi         113.2500       39.1667           83       173     2012      01        11        011              0.080625      -8.699524       0.000000       0.111934   -9999.000000   -9999.000000       0.045200   -9999.000000
53585     53585     shanxi         113.2500       39.1667           83       173     2012      01        12        012              0.080792      -8.684906       0.000000       0.109394   -9999.000000   -9999.000000       0.035400       0.059000
53585     53585     shanxi         113.2500       39.1667           83       173     2012      01        13        013              0.081292      -7.335449       0.000000       0.117603   -9999.000000   -9999.000000       0.034200       0.068000
53585     53585     shanxi         113.2500       39.1667           83       173     2012      01        14        014              0.082500      -6.980469       0.000000       0.119828   -9999.000000   -9999.000000       0.038000       0.029000
53585     53585     shanxi         113.2500       39.1667           83       173     2012      01        15        015              0.082333      -6.347382       0.000000       0.119955   -9999.000000   -9999.000000       0.039900       0.026000
53585     53585     shanxi         113.2500       39.1667           83       173     2012      01        16        016              0.081750      -6.465179       0.000000       0.121124   -9999.000000   -9999.000000       0.036900       0.001000
53585     53585     shanxi         113.2500       39.1667           83       173     2012      01        17        017              0.000000      -6.554749       0.000000       0.118919   -9999.000000   -9999.000000       0.040100       0.135000
53585     53585     shanxi         113.2500       39.1667           83       173     2012      01        18        018              0.081958      -6.443878       1.171475       0.128244   -9999.000000   -9999.000000       0.034700       0.034000
53585     53585     shanxi         113.2500       39.1667           83       173     2012      01        19        019              0.083250      -6.536285       0.000000       0.118796   -9999.000000   -9999.000000       0.036900       0.038000
53585     53585     shanxi         113.2500       39.1667           83       173     2012      01        20        020              0.083583      -5.354523       0.000000       0.127330   -9999.000000   -9999.000000   -9999.000000   -9999.000000
53585     53585     shanxi         113.2500       39.1667           83       173     2012      01        21        021              0.082042     -11.080200       0.000000       0.109314   -9999.000000   -9999.000000       0.029100       0.018000
53585     53585     shanxi         113.2500       39.1667           83       173     2012      01        22        022              0.080208     -15.403931       0.000000       0.103802   -9999.000000   -9999.000000       0.033400       0.063000
53585     53585     shanxi         113.2500       39.1667           83       173     2012      01        23        023              0.079500     -14.743073       0.000000       0.101761   -9999.000000   -9999.000000       0.026700   -9999.000000
53585     53585     shanxi         113.2500       39.1667           83       173     2012      01        24        024              0.079208     -13.396973       0.000000       0.102357   -9999.000000   -9999.000000   -9999.000000       0.033000
53585     53585     shanxi         113.2500       39.1667           83       173     2012      01        25        025              0.079208     -12.142181       0.000000       0.102926   -9999.000000   -9999.000000       0.028500       0.114000
53585     53585     shanxi         113.2500       39.1667           83       173     2012      01        26        026              0.079917     -10.022064       0.000000       0.103846   -9999.000000   -9999.000000       0.037500       0.042000
53585     53585     shanxi         113.2500       39.1667           83       173     2012      01        27        027              0.080833      -8.432831       0.000000       0.110747   -9999.000000   -9999.000000       0.027800       0.088000
53585     53585     shanxi         113.2500       39.1667           83       173     2012      01        28        028              0.081583      -6.689240       0.000000       0.121149   -9999.000000   -9999.000000       0.034800   -9999.000000
53585     53585     shanxi         113.2500       39.1667           83       173     2012      01        29        029              0.081708      -7.280914       0.000000       0.120783   -9999.000000   -9999.000000       0.031200   -9999.000000
53585     53585     shanxi         113.2500       39.1667           83       173     2012      01        30        030              0.081667      -8.293182       0.000000       0.112966   -9999.000000   -9999.000000       0.036000       0.082000
53585     53585     shanxi         113.2500       39.1667           83       173     2012      01        31        031              0.081958      -5.802002       0.000000       0.122402   -9999.000000   -9999.000000       0.035600       0.118000
53585     53585     shanxi         113.2500       39.1667           83       173     2012      02        01        032              0.080708      -8.306274       0.768097       0.116415   -9999.000000   -9999.000000       0.037400       0.168000
53585     53585     shanxi         113.2500       39.1667           83       173     2012      02        02        033              0.080167     -11.469604       0.000000       0.104679   -9999.000000   -9999.000000       0.038900   -9999.000000
53585     53585     shanxi         113.2500       39.1667           83       173     2012      02        03        034              0.080875     -10.231689       0.144432       0.105481   -9999.000000   -9999.000000       0.040000       0.092000
53585     53585     shanxi         113.2500       39.1667           83       173     2012      02        04        035              0.081125      -8.421478       0.000000       0.115279   -9999.000000   -9999.000000       0.035600       0.043000
53585     53585     shanxi         113.2500       39.1667           83       173     2012      02        05        036              0.082708      -7.393036       0.000000       0.112409   -9999.000000   -9999.000000       0.038300       0.142000
53585     53585     shanxi         113.2500       39.1667           83       173     2012      02        06        037              0.081458      -4.833160       0.000000       0.132395   -9999.000000   -9999.000000   -9999.000000       0.129000
53585     53585     shanxi         113.2500       39.1667           83       173     2012      02        07        038              0.080458     -11.277710       0.000000       0.107547   -9999.000000   -9999.000000       0.039800   -9999.000000
53585     53585     shanxi         113.2500       39.1667           83       173     2012      02        08        039              0.080708     -11.185425       0.169626       0.105105   -9999.000000   -9999.000000       0.046000       0.006000
53585     53585     shanxi         113.2500       39.1667           83       173     2012      02        09        040              0.080333      -9.457520       0.000000       0.108264   -9999.000000   -9999.000000       0.041400       0.093000
53585     53585     shanxi         113.2500       39.1667           83       173     2012      02        10        041              0.080917      -9.414490       0.000000       0.110161   -9999.000000   -9999.000000       0.040800       0.001000
53585     53585     shanxi         113.2500       39.1667           83       173     2012      02        11        042              0.081875      -7.582062       0.000000       0.116843   -9999.000000   -9999.000000       0.042800       0.042000
53585     53585     shanxi         113.2500       39.1667           83       173     2012      02        12        043              0.081750      -5.503387       0.000000       0.131142   -9999.000000   -9999.000000   -9999.000000       0.030000
53585     53585     shanxi         113.2500       39.1667           83       173     2012      02        13        044              0.083583      -5.807526       0.164692       0.121353       0.070000   -9999.000000   -9999.000000       0.056000
53585     53585     shanxi         113.2500       39.1667           83       173     2012      02        14        045              0.084667      -1.739929       0.435550       0.153795   -9999.000000   -9999.000000       0.050100       0.076000
53585     53585     shanxi         113.2500       39.1667           83       173     2012      02        15        046              0.084083      -4.332397       0.103153       0.142040   -9999.000000   -9999.000000       0.041400       0.202000
53585     53585     shanxi         113.2500       39.1667           83       173     2012      02        16        047              0.082750      -5.797485       0.152028       0.134631   -9999.000000   -9999.000000       0.044100       0.063000
53585     53585     shanxi         113.2500       39.1667           83       173     2012      02        17        048              0.082083      -8.491608       0.000000       0.115584   -9999.000000   -9999.000000       0.042700       0.016000
53585     53585     shanxi         113.2500       39.1667           83       173     2012      02        18        049              0.082042      -8.957794       0.000000       0.113348   -9999.000000   -9999.000000       0.045000       0.075000
53585     53585     shanxi         113.2500       39.1667           83       173     2012      02        19        050              0.082542      -7.219940       0.142652       0.121322       0.075000   -9999.000000       0.046700       0.085000
53585     53585     shanxi         113.2500       39.1667           83       173     2012      02        20        051              0.084333      -4.510956       0.197814       0.137385       0.077000   -9999.000000       0.047400       0.220000
53585     53585     shanxi         113.2500       39.1667           83       173     2012      02        21        052              0.086333      -1.221344       0.271163       0.157056   -9999.000000       0.061300   -9999.000000   -9999.000000
53585     53585     shanxi         113.2500       39.1667           83       173     2012      02        22        053              0.088250       2.039001       0.000000       0.181336   -9999.000000   -9999.000000       0.048600       0.117000
53585     53585     shanxi         113.2500       39.1667           83       173     2012      02        23        054              0.088917       0.270172       0.262158       0.169981       0.065000       0.027500   -9999.000000       0.083000
53585     53585     shanxi         113.2500       39.1667           83       173     2012      02        24        055              0.089208       0.071533       0.000000       0.164476   -9999.000000   -9999.000000       0.042000       0.171000
53585     53585     shanxi         113.2500       39.1667           83       173     2012      02        25        056              0.087583      -3.382111       0.212468       0.147065   -9999.000000       0.045600       0.046500       0.116000
53585     53585     shanxi         113.2500       39.1667           83       173     2012      02        26        057              0.088208      -5.769775       0.000000       0.122345   -9999.000000       0.051600       0.047800   -9999.000000
53585     53585     shanxi         113.2500       39.1667           83       173     2012      02        27        058              0.089042      -2.867676       0.262173       0.147664   -9999.000000   -9999.000000   -9999.000000       0.093000
53585     53585     shanxi         113.2500       39.1667           83       173     2012      02        28        059              0.090458      -0.110443       0.000000       0.164779       0.070000       0.034400       0.048700       0.166000
53585     53585     shanxi         113.2500       39.1667           83       173     2012      02        29        060              0.000000   -9999.000000       0.000000   -9999.000000       0.076000   -9999.000000   -9999.000000   -9999.000000
53585     53585     shanxi         113.2500       39.1667           83       173     2012      03        01        061              0.097042       1.153229       0.255118       0.173161   -9999.000000   -9999.000000       0.044000       0.198000
53585     53585     shanxi         113.2500       39.1667           83       173     2012      03        02        062              0.096458      -0.431244       0.000000       0.163256   -9999.000000   -9999.000000       0.049000   -9999.000000
53585     53585     shanxi         113.2500       39.1667           83       173     2012      03        03        063              0.093667       0.283142       0.211284       0.170489   -9999.000000   -9999.000000       0.049000       0.150000
53585     53585     shanxi         113.2500       39.1667           83       173     2012      03        04        064              0.095000      -0.805939       0.000000       0.161893       0.077000       0.129800       0.051100       0.186000
53585     53585     shanxi         113.2500       39.1667           83       173     2012      03        05        065              0.095375       0.783539       0.351410       0.172042   -9999.000000       0.066300       0.051800       0.271000
53585     53585     shanxi         113.2500       39.1667           83       173     2012      03        06        066              0.096000      -1.887482       0.000000       0.156978       0.077000   -9999.000000       0.048900       0.195000
53585     53585     shanxi         113.2500       39.1667           83       173     2012      03        07        067              0.000000      -0.865082       0.000000       0.159108       0.080000       0.085400       0.049400   -9999.000000
53585     53585     shanxi         113.2500       39.1667           83       173     2012      03        08        068              0.097167      -0.928528       0.000000       0.158926   -9999.000000   -9999.000000       0.054100       0.109000
53585     53585     shanxi         113.2500       39.1667           83       173     2012      03        09        069              0.102792      -2.013367       0.000000       0.151414   -9999.000000   -9999.000000       0.053700       0.211000
53585     53585     shanxi         113.2500       39.1667           83       173     2012      03        10        070              0.112750       1.160736       0.000000       0.170756       0.069000       0.020400       0.048800       0.254000
53585     53585     shanxi         113.2500       39.1667           83       173     2012      03        11        071              0.104792      -2.621613       0.000000       0.152084       0.073000       0.421400   -9999.000000       0.128000
53585     53585     shanxi         113.2500       39.1667           83       173     2012      03        12        072              0.112875      -2.089600       0.268112       0.148916       0.078000       0.019200       0.044300       0.060000
53585     53585     shanxi         113.2500       39.1667           83       173     2012      03        13        073              0.121125       0.811249       0.000000       0.163010   -9999.000000   -9999.000000       0.048700       0.146000
53585     53585     shanxi         113.2500       39.1667           83       173     2012      03        14        074              0.136826       2.344788       0.000000       0.171080   -9999.000000       0.127600   -9999.000000       0.246000
53585     53585     shanxi         113.2500       39.1667           83       173     2012      03        15        075              0.141625       3.661407       0.000000       0.177954   -9999.000000       0.115000       0.058100       0.340000
53585     53585     shanxi         113.2500       39.1667           83       173     2012      03        16        076              0.149375       3.220001       0.378253       0.187639       0.079000   -9999.000000       0.057200       0.191000
53585     53585     shanxi         113.2500       39.1667           83       173     2012      03        17        077              0.150250       6.303375       0.000000       0.188613       0.082000       0.121600       0.055000       0.267000
53585     53585     shanxi         113.2500       39.1667           83       173     2012      03        18        078              0.151167       5.759857       0.224157       0.182814       0.079000       0.011600       0.049000       0.231000
53585     53585     shanxi         113.2500       39.1667           83       173     2012      03        19        079              0.151000       2.681274       0.000000       0.175668   -9999.000000   -9999.000000       0.059500       0.340000
53585     53585     shanxi         113.2500       39.1667           83       173     2012      03        20        080              0.153000       3.708862       0.168646       0.182858       0.078000       0.088900       0.060600       0.429000
53585     53585     shanxi         113.2500       39.1667           83       173     2012      03        21        081              0.151417       4.701965       0.000000       0.188190   -9999.000000   -9999.000000       0.075500   -9999.000000
53585     53585     shanxi         113.2500       39.1667           83       173     2012      03        22        082              0.160417       2.718475       0.728621       0.185045   -9999.000000   -9999.000000   -9999.000000       0.459000
53585     53585     shanxi         113.2500       39.1667           83       173     2012      03        23        083              0.160583       3.192200       0.220348       0.189182   -9999.000000       0.090000       0.050300       0.262000
53585     53585     shanxi         113.2500       39.1667           83       173     2012      03        24        084              0.157583       2.335571       0.219969       0.177597   -9999.000000   -9999.000000   -9999.000000       0.396000
53585     53585     shanxi         113.2500       39.1667           83       173     2012      03        25        085              0.000000       5.698151       0.000000       0.184431   -9999.000000       0.084700       0.056000       0.482000
53585     53585     shanxi         113.2500       39.1667           83       173     2012      03        26        086              0.156208       7.246002       0.401460       0.186338       0.074000   -9999.000000       0.058200   -9999.000000
53585     53585     shanxi         113.2500       39.1667           83       173     2012      03        27        087              0.155625       9.049133       0.000000       0.185173       0.078000   -9999.000000       0.063200       0.299000
53585     53585     shanxi         113.2500       39.1667           83       173     2012      03        28        088              0.154750       9.459167       0.190328       0.179533       0.083000   -9999.000000   -9999.000000       0.543000
53585     53585     shanxi         113.2500       39.1667           83       173     2012      03        29        089              0.154333      11.807404       0.000000       0.178190   -9999.000000   -9999.000000       0.047900       0.345000
53585     53585     shanxi         113.2500       39.1667           83       173     2012      03        30        090              0.151750       9.060822       0.000000       0.169496   -9999.000000       0.009800       0.058400       0.379000
53585     53585     shanxi         113.2500       39.1667           83       173     2012      03        31        091              0.151042       5.505524       0.239222       0.172254       0.070000   -9999.000000       0.057100   -9999.000000
53585     53585     shanxi         113.2500       39.1667           83       173     2012      04        01        092              0.149458       9.142334       0.000000       0.169673       0.078000   -9999.000000       0.057900       0.356000
53585     53585     shanxi         113.2500       39.1667           83       173     2012      04        02        093              0.146708      10.436707       0.000000       0.166767       0.087000       0.088600       0.059900       0.289000
53585     53585     shanxi         113.2500       39.1667           83       173     2012      04        03        094              0.146375       3.496552       0.187230       0.158130   -9999.000000       0.146300       0.058100       0.355000
53585     53585     shanxi         113.2500       39.1667           83       173     2012      04        04        095              0.146500       8.000427       0.435618       0.165899   -9999.000000       0.138500       0.051200       0.481000
53585     53585     shanxi         113.2500       39.1667           83       173     2012      04        05        096              0.146000       9.536346       0.000000       0.166804       0.070000   -9999.000000       0.059600   -9999.000000
53585     53585     shanxi         113.2500       39.1667           83       173     2012      04        06        097              0.145458       9.480164       0.217561       0.165742       0.074000   -9999.000000       0.054800       0.321000
53585     53585     shanxi         113.2500       39.1667           83       173     2012      04        07        098              0.144792      11.592133       0.187724       0.162553       0.072000       0.054600       0.059000       0.489000
53585     53585     shanxi         113.2500       39.1667           83       173     2012      04        08        099              0.144542      13.518585       0.000000       0.159053       0.071000   -9999.000000   -9999.000000       0.297000
53585     53585     shanxi         113.2500       39.1667           83       173     2012      04        09        100              0.144000      14.270020       0.000000       0.154707       0.077000       0.141400       0.054700       0.443000
53585     53585     shanxi         113.2500       39.1667           83       173     2012      04        10        101              0.141917      16.351868       0.470352       0.151685   -9999.000000       0.101600       0.066100       0.143000
53585     53585     shanxi         113.2500       39.1667           83       173     2012      04        11        102              0.140167      12.236450       0.223234       0.156356       0.066000   -9999.000000       0.059900       0.340000
53585     53585     shanxi         113.2500       39.1667           83       173     2012      04        12        103              0.140375       7.322845       0.000000       0.157941       0.072000       0.105500       0.055700       0.458000
53585     53585     shanxi         113.2500       39.1667           83       173     2012      04        13        104              0.140000      11.858673       0.000000       0.159480       0.068000   -9999.000000       0.059800       0.480000
53585     53585     shanxi         113.2500       39.1667           83       173     2012      04        14        105              0.139792      14.121338       0.000000       0.154131       0.074000   -9999.000000       0.061800       0.396000
53585     53585     shanxi         113.2500       39.1667           83       173     2012      04        15        106              0.138708      16.154724       0.000000       0.149126   -9999.000000       0.191800       0.048600       0.256000
53585     53585     shanxi         113.2500       39.1667           83       173     2012      04        16        107              0.137833      14.572418       0.000000       0.146800       0.066000   -9999.000000       0.062800       0.249000
53585     53585     shanxi         113.2500       39.1667           83       173     2012      04        17        108              0.137083      14.391449       0.000000       0.145720       0.064000   -9999.000000       0.054300       0.534000
53585     53585     shanxi         113.2500       39.1667           83       173     2012      04        18        109              0.136292      17.391022       5.757279       0.144496       0.073000   -9999.000000   -9999.000000       0.827000
53585     53585     shanxi         113.2500       39.1667           83       173     2012      04        19        110              0.140417      14.312256       0.000000       0.199680       0.077000       0.073300       0.063600   -9999.000000
53585     53585     shanxi         113.2500       39.1667           83       173     2012      04        20        111              0.141208      14.991760       0.062891       0.202074   -9999.000000       0.107100       0.076300       0.371000
53585     53585     shanxi         113.2500       39.1667           83       173     2012      04        21        112              0.141208      15.627136       0.000000       0.185623       0.070000   -9999.000000       0.059300       0.424000
53585     53585     shanxi         113.2500       39.1667           83       173     2012      04        22        113              0.140792      16.802063       0.113525       0.173583       0.068000       0.231900       0.068200       0.444000
53585     53585     shanxi         113.2500       39.1667           83       173     2012      04        23        114              0.148625      21.051697      18.303955       0.161532       0.073000   -9999.000000       0.054300       0.514000
53585     53585     shanxi         113.2500       39.1667           83       173     2012      04        24        115              0.217042      21.670166       3.365380       0.206922   -9999.000000       0.164500       0.119000   -9999.000000
53585     53585     shanxi         113.2500       39.1667           83       173     2012      04        25        116              0.000000      10.536926       0.000000       0.284168   -9999.000000       0.234400   -9999.000000       0.573000
53585     53585     shanxi         113.2500       39.1667           83       173     2012      04        26        117              0.191833      10.174469       0.000000       0.254375       0.078500   -9999.000000       0.059600       0.520000
53585     53585     shanxi         113.2500       39.1667           83       173     2012      04        27        118              0.183125      15.830627       0.000000       0.235047       0.072500       0.248000   -9999.000000       0.475000
53585     53585     shanxi         113.2500       39.1667           83       173     2012      04        28        119              0.177042      14.340485       0.000000       0.219242       0.071000       0.235400       0.053400       0.476000
53585     53585     shanxi         113.2500       39.1667           83       173     2012      04        29        120              0.172083      17.043793       0.000000       0.206914       0.068000       0.137700       0.054500   -9999.000000
53585     53585     shanxi         113.2500       39.1667           83       173     2012      04        30        121              0.168000      20.170929       0.000000       0.194690       0.071000       0.186100       0.055100       0.383000
53585     53585     shanxi         113.2500       39.1667           83       173     2012      05        01        122              0.163292      21.254425       0.000000       0.183438       0.069500   -9999.000000       0.069700       0.446000
53585     53585     shanxi         113.2500       39.1667           83       173     2012      05        02        123              0.161583      19.550110       0.000000       0.177605       0.064500   -9999.000000       0.051100       0.506000
53585     53585     shanxi         113.2500       39.1667           83       173     2012      05        03        124              0.159042      20.777618       0.000000       0.169259       0.069000   -9999.000000       0.059300       0.474000
53585     53585     shanxi         113.2500       39.1667           83       173     2012      05        04        125              0.156375      22.623840       0.339720       0.161294       0.071000   -9999.000000       0.049000   -9999.000000
53585     53585     shanxi         113.2500       39.1667           83       173     2012      05        05        126              0.153500      23.811005       0.000000       0.156779       0.068000       0.047600       0.051800       0.332000
53585     53585     shanxi         113.2500       39.1667           83       173     2012      05        06        127              0.150208      22.636139       0.486867       0.152606       0.065000   -9999.000000       0.050400       0.431000
53585     53585     shanxi         113.2500       39.1667           83       173     2012      05        07        128              0.148333      25.077271       0.349037       0.152000   -9999.000000       0.175000       0.054900       0.348000
53585     53585     shanxi         113.2500       39.1667           83       173     2012      05        08        129              0.146208      25.621613       2.331147       0.152175       0.065000       0.037400       0.045800       0.267000
53585     53585     shanxi         113.2500       39.1667           83       173     2012      05        09        130              0.141208      24.864227       5.085650       0.174210       0.107000       0.228600       0.074700       0.919000
53585     53585     shanxi         113.2500       39.1667           83       173     2012      05        10        131              0.143826      19.199951       0.231601       0.233330       0.075000       0.230800       0.050400       0.370000
53585     53585     shanxi         113.2500       39.1667           83       173     2012      05        11        132              0.146542      24.424255       4.939433       0.200275       0.130000   -9999.000000       0.096000       0.820000
53585     53585     shanxi         113.2500       39.1667           83       173     2012      05        12        133              0.153083      16.863159       0.000000       0.236985       0.087000       0.165700   -9999.000000       0.433000
53585     53585     shanxi         113.2500       39.1667           83       173     2012      05        13        134              0.149375      16.419983       0.000000       0.218606       0.082500       0.113300       0.053900       0.361000
53585     53585     shanxi         113.2500       39.1667           83       173     2012      05        14        135              0.145917      16.482941       0.000000       0.198313       0.068000   -9999.000000       0.060500       0.249000
53585     53585     shanxi         113.2500       39.1667           83       173     2012      05        15        136              0.143333      15.920441       0.097872       0.184618       0.054000       0.115400       0.050200       0.316000
53585     53585     shanxi         113.2500       39.1667           83       173     2012      05        16        137              0.142042      17.470215       0.000000       0.174851       0.075000       0.080000       0.049100       0.407000
53585     53585     shanxi         113.2500       39.1667           83       173     2012      05        17        138              0.140583      18.543121       0.000000       0.166398       0.068500   -9999.000000       0.050500       0.433000
53585     53585     shanxi         113.2500       39.1667           83       173     2012      05        18        139              0.138750      22.994690       0.137220       0.157394       0.066500       0.119200       0.056600   -9999.000000
53585     53585     shanxi         113.2500       39.1667           83       173     2012      05        19        140              0.137042      24.421692       0.141912       0.152734       0.067000   -9999.000000       0.052700       0.228000
53585     53585     shanxi         113.2500       39.1667           83       173     2012      05        20        141              0.132458      24.797058       0.817855       0.149832       0.059000   -9999.000000       0.062200       0.378000
53585     53585     shanxi         113.2500       39.1667           83       173     2012      05        21        142              0.129375      21.675507       2.250955       0.160447       0.142000   -9999.000000       0.081300       0.414000
53585     53585     shanxi         113.2500       39.1667           83       173     2012      05        22        143              0.129542      17.736084       0.231833       0.182807       0.098000   -9999.000000       0.056000       0.375000
53585     53585     shanxi         113.2500       39.1667           83       173     2012      05        23        144              0.128375      18.861176       0.141098       0.180139   -9999.000000       0.061200       0.051900   -9999.000000
53585     53585     shanxi         113.2500       39.1667           83       173     2012      05        24        145              0.129125      18.858704       0.000000       0.164338       0.084000   -9999.000000       0.055200       0.288000
53585     53585     shanxi         113.2500       39.1667           83       173     2012      05        25        146              0.000000      21.081238       0.417584       0.154183       0.074000   -9999.000000       0.057100       0.355000
53585     53585     shanxi         113.2500       39.1667           83       173     2012      05        26        147              0.127333      18.917572       0.000000       0.154448       0.080000       0.063400       0.055600       0.389000
53585     53585     shanxi         113.2500       39.1667           83       173     2012      05        27        148              0.127125      23.626434       0.000000       0.147443       0.079000   -9999.000000       0.046100       0.321000
53585     53585     shanxi         113.2500       39.1667           83       173     2012      05        28        149              0.125375      25.356659       4.547302       0.142811       0.076500       0.094300       0.049200   -9999.000000
53585     53585     shanxi         113.2500       39.1667           83       173     2012      05        29        150              0.125583      26.567657       1.749515       0.150730       0.104000   -9999.000000   -9999.000000       0.711000
53585     53585     shanxi         113.2500       39.1667           83       173     2012      05        30        151              0.128208      18.447601       0.000000       0.215039       0.082000   -9999.000000       0.051300   -9999.000000
53585     53585     shanxi         113.2500       39.1667           83       173     2012      05        31        152              0.177417      19.936707      28.509670       0.182295   -9999.000000       0.264000   -9999.000000   -9999.000000
53585     53585     shanxi         113.2500       39.1667           83       173     2012      06        01        153              0.203125      16.893768       3.076350       0.301665   -9999.000000   -9999.000000       0.099000       0.922000
53585     53585     shanxi         113.2500       39.1667           83       173     2012      06        02        154              0.188292      18.622070       0.800730       0.289624       0.123500       0.247600       0.069900   -9999.000000
53585     53585     shanxi         113.2500       39.1667           83       173     2012      06        03        155              0.183458      20.621338       6.495555       0.265833       0.180500       0.066100       0.099100       0.553000
53585     53585     shanxi         113.2500       39.1667           83       173     2012      06        04        156              0.177750      19.046448       0.000000       0.285552       0.121000       0.216500       0.110500       0.553000
53585     53585     shanxi         113.2500       39.1667           83       173     2012      06        05        157              0.170875      22.633575       0.986034       0.254603       0.106500   -9999.000000       0.083300       0.583000
53585     53585     shanxi         113.2500       39.1667           83       173     2012      06        06        158              0.162333      24.138794       5.374045       0.236096       0.106000   -9999.000000       0.102200       0.583000
53585     53585     shanxi         113.2500       39.1667           83       173     2012      06        07        159              0.158167      18.864441       0.961525       0.269131       0.104500   -9999.000000       0.089300       0.545000
53585     53585     shanxi         113.2500       39.1667           83       173     2012      06        08        160              0.155750      19.888763       0.000000       0.251701       0.091500       0.094000       0.079800       0.394000
53585     53585     shanxi         113.2500       39.1667           83       173     2012      06        09        161              0.150708      22.452728       0.778065       0.234418       0.100000   -9999.000000       0.082900       0.547000
53585     53585     shanxi         113.2500       39.1667           83       173     2012      06        10        162              0.145167      20.832184       0.000000       0.227041       0.082000       0.064500       0.077600       0.465000
53585     53585     shanxi         113.2500       39.1667           83       173     2012      06        11        163              0.000000      19.802734       0.156710       0.212805       0.121000   -9999.000000       0.075100       0.333000
53585     53585     shanxi         113.2500       39.1667           83       173     2012      06        12        164              0.136167      21.256073       0.000000       0.198644       0.110000   -9999.000000       0.074200       0.328000
53585     53585     shanxi         113.2500       39.1667           83       173     2012      06        13        165              0.131250      22.210602       0.131428       0.188705       0.112500       0.111400       0.065100       0.355000
53585     53585     shanxi         113.2500       39.1667           83       173     2012      06        14        166              0.126000      21.737793       0.618061       0.181376       0.115000   -9999.000000       0.066800       0.517000
53585     53585     shanxi         113.2500       39.1667           83       173     2012      06        15        167              0.122708      18.503632       0.000000       0.186466       0.117000       0.224000   -9999.000000       0.432000
53585     53585     shanxi         113.2500       39.1667           83       173     2012      06        16        168              0.118958      20.526337       0.000000       0.179095       0.099000   -9999.000000       0.065400   -9999.000000
53585     53585     shanxi         113.2500       39.1667           83       173     2012      06        17        169              0.115875      24.876465       0.000000       0.166936       0.101000       0.249000       0.071000       0.370000
53585     53585     shanxi         113.2500       39.1667           83       173     2012      06        18        170              0.112167      27.996979       1.565390       0.157268       0.111000       0.180200       0.061500       0.481000
53585     53585     shanxi         113.2500       39.1667           83       173     2012      06        19        171              0.107833      28.270538       1.830678       0.153603       0.087000   -9999.000000       0.068800       0.582000
53585     53585     shanxi         113.2500       39.1667           83       173     2012      06        20        172              0.105958      24.612915       0.000000       0.172806       0.110000       0.212000       0.063100       0.549000
53585     53585     shanxi         113.2500       39.1667           83       173     2012      06        21        173              0.106292      24.712067       0.243054       0.170547       0.154000   -9999.000000       0.082800   -9999.000000
53585     53585     shanxi         113.2500       39.1667           83       173     2012      06        22        174              0.106833      25.002594       3.067564       0.162989       0.159000   -9999.000000       0.080600       0.475000
53585     53585     shanxi         113.2500       39.1667           83       173     2012      06        23        175              0.110125      25.508942       9.622424       0.183323       0.127000       0.262700       0.103200       0.452000
53585     53585     shanxi         113.2500       39.1667           83       173     2012      06        24        176              0.140583      25.630219       0.889479       0.232674       0.166000   -9999.000000       0.078200       0.978000
53585     53585     shanxi         113.2500       39.1667           83       173     2012      06        25        177              0.142250      22.649689       0.000000       0.247569       0.150000   -9999.000000       0.106400       0.574000
53585     53585     shanxi         113.2500       39.1667           83       173     2012      06        26        178              0.136542      25.362030       0.612138       0.219072       0.136500       0.142200   -9999.000000   -9999.000000
53585     53585     shanxi         113.2500       39.1667           83       173     2012      06        27        179              0.130875      24.677216       9.276590       0.207174   -9999.000000   -9999.000000       0.157400       0.525000
53585     53585     shanxi         113.2500       39.1667           83       173     2012      06        28        180              0.218792      22.390137      19.255322       0.219189       0.232000       0.304200       0.161800       1.000000
53585     53585     shanxi         113.2500       39.1667           83       173     2012      06        29        181              0.233667      19.349152       0.114153       0.301920       0.178500   -9999.000000       0.142500       1.000000
53585     53585     shanxi         113.2500       39.1667           83       173     2012      06        30        182              0.207708      22.203827       0.000000       0.289544       0.136000   -9999.000000       0.107500   -9999.000000
53585     53585     shanxi         113.2500       39.1667           83       173     2012      07        01        183              0.192833      24.868683       0.000000       0.259684       0.142000       0.233400       0.100100   -9999.000000
53585     53585     shanxi         113.2500       39.1667           83       173     2012      07        02        184              0.181083      26.124298       0.000000       0.239694       0.166000   -9999.000000   -9999.000000       0.425000
53585     53585     shanxi         113.2500       39.1667           83       173     2012      07        03        185              0.170708      25.240784       0.961325       0.221205       0.161000       0.134400       0.102500       0.699000
53585     53585     shanxi         113.2500       39.1667           83       173     2012      07        04        186              0.163667      25.958435       0.984738       0.215183       0.134500   -9999.000000       0.109200       0.710000
53585     53585     shanxi         113.2500       39.1667           83       173     2012      07        05        187              0.158583      25.464813       1.089678       0.207328       0.138000   -9999.000000       0.096800       0.483000
53585     53585     shanxi         113.2500       39.1667           83       173     2012      07        06        188              0.152625      27.647095       0.847343       0.202823   -9999.000000       0.403800       0.100900       0.617000
53585     53585     shanxi         113.2500       39.1667           83       173     2012      07        07        189              0.144792      28.964325       0.373505       0.189431   -9999.000000   -9999.000000       0.097800       0.430000
53585     53585     shanxi         113.2500       39.1667           83       173     2012      07        08        190              0.140609      26.023987       3.288505       0.182445       0.180000   -9999.000000       0.129000       0.870000
53585     53585     shanxi         113.2500       39.1667           83       173     2012      07        09        191              0.138167      25.759491       3.024469       0.200538       0.151500       0.091300       0.156700       0.766000
53585     53585     shanxi         113.2500       39.1667           83       173     2012      07        10        192              0.140958      25.272552       1.563447       0.224528       0.151500       0.364400       0.176000       0.801000
53585     53585     shanxi         113.2500       39.1667           83       173     2012      07        11        193              0.146250      25.983917       0.174622       0.223033       0.154000       0.186000       0.129600       0.606000
53585     53585     shanxi         113.2500       39.1667           83       173     2012      07        12        194              0.141750      27.038116       0.674293       0.198472       0.157000   -9999.000000       0.132800       0.480000
53585     53585     shanxi         113.2500       39.1667           83       173     2012      07        13        195              0.135625      25.161194       0.518313       0.190645       0.180000       0.261000   -9999.000000       0.597000
53585     53585     shanxi         113.2500       39.1667           83       173     2012      07        14        196              0.171375      25.741791       5.529147       0.184001       0.203500       0.143000       0.150100       0.777000
53585     53585     shanxi         113.2500       39.1667           83       173     2012      07        15        197              0.176783      22.125610       0.154060       0.235371       0.151500   -9999.000000       0.150100   -9999.000000
53585     53585     shanxi         113.2500       39.1667           83       173     2012      07        16        198              0.163333      25.564484       0.000000       0.204661       0.152000       0.193100       0.122000       0.517000
53585     53585     shanxi         113.2500       39.1667           83       173     2012      07        17        199              0.152917      26.152313       0.000000       0.184558       0.154000   -9999.000000       0.123600       0.416000
53585     53585     shanxi         113.2500       39.1667           83       173     2012      07        18        200              0.144042      26.432281       0.000000       0.169442       0.155000   -9999.000000       0.124300       0.498000
53585     53585     shanxi         113.2500       39.1667           83       173     2012      07        19        201              0.137583      27.127350       0.060394       0.160643       0.158000       0.069300       0.140600       0.488000
53585     53585     shanxi         113.2500       39.1667           83       173     2012      07        20        202              0.130913      27.489105       2.682597       0.154159       0.142500   -9999.000000       0.131800   -9999.000000
53585     53585     shanxi         113.2500       39.1667           83       173     2012      07        21        203              0.236609      29.346222      82.606064       0.157179   -9999.000000       0.144700       0.189300       1.000000
53585     53585     shanxi         113.2500       39.1667           83       173     2012      07        22        204              0.228750      20.533722       0.143299       0.359642       0.283000   -9999.000000       0.181600       0.986000
53585     53585     shanxi         113.2500       39.1667           83       173     2012      07        23        205              0.209667      22.421600       0.080095       0.311909       0.242000       0.163700       0.188100       0.983000
53585     53585     shanxi         113.2500       39.1667           83       173     2012      07        24        206              0.198792      23.251038       0.351489       0.296075       0.227000       0.292700       0.168800       0.888000
53585     53585     shanxi         113.2500       39.1667           83       173     2012      07        25        207              0.202875      25.221954       1.402156       0.284388       0.260500   -9999.000000       0.189400   -9999.000000
53585     53585     shanxi         113.2500       39.1667           83       173     2012      07        26        208              0.212625      23.597992       1.241557       0.287196       0.235500       0.226600       0.178900       0.827000
53585     53585     shanxi         113.2500       39.1667           83       173     2012      07        27        209              0.212542      25.402588       7.495585       0.280819       0.254000       0.186600       0.177800       0.819000
53585     53585     shanxi         113.2500       39.1667           83       173     2012      07        28        210              0.214292      24.669586       0.600707       0.283329       0.233000   -9999.000000       0.176200       1.000000
53585     53585     shanxi         113.2500       39.1667           83       173     2012      07        29        211              0.204333      25.294617       0.000000       0.291221       0.221000       0.208400       0.160400       0.855000
53585     53585     shanxi         113.2500       39.1667           83       173     2012      07        30        212              0.255542      25.661285      48.474594       0.271086       0.270000   -9999.000000   -9999.000000   -9999.000000
53585     53585     shanxi         113.2500       39.1667           83       173     2012      07        31        213              0.243667      20.282593       1.200513       0.348039       0.276000       0.292900       0.198500       1.000000
53585     53585     shanxi         113.2500       39.1667           83       173     2012      08        01        214              0.221917      20.576813       0.134457       0.326199       0.296000       0.325700       0.206400       0.955000
53585     53585     shanxi         113.2500       39.1667           83       173     2012      08        02        215              0.209667      22.353088       0.294700       0.307768       0.275000       0.320400       0.193500       0.912000
53585     53585     shanxi         113.2500       39.1667           83       173     2012      08        03        216              0.198792      24.837982       0.248675       0.295515       0.254000       0.229900       0.177500       0.837000
53585     53585     shanxi         113.2500       39.1667           83       173     2012      08        04        217              0.189625      25.828979       0.224824       0.285809       0.245000   -9999.000000       0.163400       0.816000
53585     53585     shanxi         113.2500       39.1667           83       173     2012      08        05        218              0.181708      26.037842       0.000000       0.276580       0.215000   -9999.000000       0.176800       0.746000
53585     53585     shanxi         113.2500       39.1667           83       173     2012      08        06        219              0.174792      25.412415       0.606389       0.269181       0.236000       0.104600       0.148800       0.699000
53585     53585     shanxi         113.2500       39.1667           83       173     2012      08        07        220              0.168792      26.170074       0.307991       0.262374       0.237000   -9999.000000   -9999.000000       0.828000
53585     53585     shanxi         113.2500       39.1667           83       173     2012      08        08        221              0.162875      26.707245       0.722588       0.256389       0.222000       0.175600       0.154400       0.683000
53585     53585     shanxi         113.2500       39.1667           83       173     2012      08        09        222              0.157958      23.633514       0.000000       0.257144       0.229000   -9999.000000       0.146700       0.670000
53585     53585     shanxi         113.2500       39.1667           83       173     2012      08        10        223              0.151708      25.007629       0.073252       0.244969       0.204000   -9999.000000       0.141200       0.553000
53585     53585     shanxi         113.2500       39.1667           83       173     2012      08        11        224              0.190333      24.743652      19.705257       0.236419       0.302000       0.327000       0.178000       0.672000
53585     53585     shanxi         113.2500       39.1667           83       173     2012      08        12        225              0.214208      19.923553       0.000000       0.304913       0.257000       0.187900       0.174000       0.889000
53585     53585     shanxi         113.2500       39.1667           83       173     2012      08        13        226              0.202875      22.091217       0.056464       0.291070       0.260000       0.064100       0.191300   -9999.000000
53585     53585     shanxi         113.2500       39.1667           83       173     2012      08        14        227              0.202458      23.000916       3.925903       0.275757       0.263000   -9999.000000       0.199200       0.922000
53585     53585     shanxi         113.2500       39.1667           83       173     2012      08        15        228              0.195583      20.592102       0.000000       0.285950       0.248000       0.281800       0.190400       0.843000
53585     53585     shanxi         113.2500       39.1667           83       173     2012      08        16        229              0.187875      21.150818       0.000000       0.272017       0.202500       0.169800   -9999.000000       0.892000
53585     53585     shanxi         113.2500       39.1667           83       173     2012      08        17        230              0.183750      23.080231       0.545531       0.261982   -9999.000000       0.161800       0.179500       0.780000
53585     53585     shanxi         113.2500       39.1667           83       173     2012      08        18        231              0.183250      21.827423       0.416735       0.259775       0.262000       0.083800       0.212000   -9999.000000
53585     53585     shanxi         113.2500       39.1667           83       173     2012      08        19        232              0.178958      20.365875       0.787884       0.258333       0.199000       0.159900       0.169700       0.733000
53585     53585     shanxi         113.2500       39.1667           83       173     2012      08        20        233              0.171333      23.444946       0.295104       0.247944       0.196000       0.146300       0.157700       0.601000
53585     53585     shanxi         113.2500       39.1667           83       173     2012      08        21        234              0.163583      21.912567       0.000000       0.244080       0.194500       0.064500       0.153700       0.654000
53585     53585     shanxi         113.2500       39.1667           83       173     2012      08        22        235              0.157333      18.860138       0.000000       0.232937       0.192000   -9999.000000       0.167100   -9999.000000
53585     53585     shanxi         113.2500       39.1667           83       173     2012      08        23        236              0.152542      20.076508       0.000000       0.225990       0.181000   -9999.000000       0.154700   -9999.000000
53585     53585     shanxi         113.2500       39.1667           83       173     2012      08        24        237              0.147083      21.086761       0.000000       0.220126       0.179000       0.024000       0.168900       0.642000
53585     53585     shanxi         113.2500       39.1667           83       173     2012      08        25        238              0.000000      22.267639       0.000000       0.212900       0.244000   -9999.000000       0.154400       0.552000
53585     53585     shanxi         113.2500       39.1667           83       173     2012      08        26        239              0.139000      23.174835       2.519422       0.206478       0.218000       0.073300       0.159500       0.624000
53585     53585     shanxi         113.2500       39.1667           83       173     2012      08        27        240              0.135083      23.558350       2.101663       0.201095       0.232000   -9999.000000   -9999.000000       0.953000
53585     53585     shanxi         113.2500       39.1667           83       173     2012      08        28        241              0.131417      21.613617       0.000000       0.218517       0.225000       0.199600       0.170800   -9999.000000
53585     53585     shanxi         113.2500       39.1667           83       173     2012      08        29        242              0.127333      22.766357       0.420833       0.210459       0.209000       0.119400       0.178400       0.701000
53585     53585     shanxi         113.2500       39.1667           83       173     2012      08        30        243              0.123625      24.147369       0.000000       0.197011       0.227000   -9999.000000       0.175400       0.595000
53585     53585     shanxi         113.2500       39.1667           83       173     2012      08        31        244              0.120625      24.292999       0.074789       0.188031       0.230000       0.068100       0.164400       0.606000
53585     53585     shanxi         113.2500       39.1667           83       173     2012      09        01        245              0.168875      22.933502      35.024582       0.186099       0.230000       0.070900       0.196000       1.000000
53585     53585     shanxi         113.2500       39.1667           83       173     2012      09        02        246              0.209208      17.513611       0.000000       0.314771       0.239500       0.346500   -9999.000000       0.936000
53585     53585     shanxi         113.2500       39.1667           83       173     2012      09        03        247              0.198542      16.874603       0.000000       0.296589       0.241000       0.234400       0.184400       0.849000
53585     53585     shanxi         113.2500       39.1667           83       173     2012      09        04        248              0.191292      14.650818       0.000000       0.279524       0.169000       0.317000       0.202700       0.725000
53585     53585     shanxi         113.2500       39.1667           83       173     2012      09        05        249              0.185167      15.914368       0.000000       0.267986       0.196000       0.215100       0.173900       0.696000
53585     53585     shanxi         113.2500       39.1667           83       173     2012      09        06        250              0.179833      18.443268      11.037064       0.259958       0.203500       0.472600       0.183100       0.833000
53585     53585     shanxi         113.2500       39.1667           83       173     2012      09        07        251              0.178500      17.391571       0.000000       0.289049       0.187000   -9999.000000       0.192300       0.806000
53585     53585     shanxi         113.2500       39.1667           83       173     2012      09        08        252              0.173667      18.589661       0.000000       0.281495       0.184000       0.169000       0.184400       0.567000
53585     53585     shanxi         113.2500       39.1667           83       173     2012      09        09        253              0.169000      19.197205       0.000000       0.268229       0.179000   -9999.000000       0.174100       0.829000
53585     53585     shanxi         113.2500       39.1667           83       173     2012      09        10        254              0.164792      20.668701       0.000000       0.258231       0.212000   -9999.000000       0.171200       0.663000
53585     53585     shanxi         113.2500       39.1667           83       173     2012      09        11        255              0.161458      19.372681       0.000000       0.254152       0.153000       0.116600       0.152400   -9999.000000
53585     53585     shanxi         113.2500       39.1667           83       173     2012      09        12        256              0.156542      17.391235       0.000000       0.249009       0.153500       0.305800       0.157600       0.507000
53585     53585     shanxi         113.2500       39.1667           83       173     2012      09        13        257              0.153583      12.921936       1.201997       0.246120       0.147000       0.034600   -9999.000000       0.696000
53585     53585     shanxi         113.2500       39.1667           83       173     2012      09        14        258              0.152833      13.436371       0.000000       0.249768       0.155000   -9999.000000       0.151900       0.755000
53585     53585     shanxi         113.2500       39.1667           83       173     2012      09        15        259              0.150958      14.382568       0.000000       0.244756       0.166000       0.225000       0.166000       0.512000
53585     53585     shanxi         113.2500       39.1667           83       173     2012      09        16        260              0.148708      15.679749       0.000000       0.238972       0.158000       0.031800       0.147600   -9999.000000
53585     53585     shanxi         113.2500       39.1667           83       173     2012      09        17        261              0.146417      16.829559       0.000000       0.233870       0.151000       0.220200       0.138400       0.546000
53585     53585     shanxi         113.2500       39.1667           83       173     2012      09        18        262              0.144833      16.665283       0.559442       0.230917       0.150500       0.252800       0.139300       0.498000
53585     53585     shanxi         113.2500       39.1667           83       173     2012      09        19        263              0.148583      17.160431       0.262063       0.228029       0.149000   -9999.000000       0.152300       0.705000
53585     53585     shanxi         113.2500       39.1667           83       173     2012      09        20        264              0.148542      17.145691       2.328098       0.228948       0.144000       0.219100       0.142900       0.543000
53585     53585     shanxi         113.2500       39.1667           83       173     2012      09        21        265              0.190458      18.159729       4.428220       0.229970   -9999.000000       0.231600       0.177800   -9999.000000
53585     53585     shanxi         113.2500       39.1667           83       173     2012      09        22        266              0.188542      14.742401       0.000000       0.269939       0.143000   -9999.000000       0.153100       0.765000
53585     53585     shanxi         113.2500       39.1667           83       173     2012      09        23        267              0.181667      17.243378       0.224154       0.249610       0.123500       0.427400       0.153600       0.616000
53585     53585     shanxi         113.2500       39.1667           83       173     2012      09        24        268              0.176042      17.511627       0.459374       0.240579       0.134000       0.274900       0.122400       0.659000
53585     53585     shanxi         113.2500       39.1667           83       173     2012      09        25        269              0.207375      17.839874      11.769698       0.237652   -9999.000000   -9999.000000       0.144300       0.904000
53585     53585     shanxi         113.2500       39.1667           83       173     2012      09        26        270              0.206000      12.194733       1.226238       0.295393       0.164000       0.186900       0.141600   -9999.000000
53585     53585     shanxi         113.2500       39.1667           83       173     2012      09        27        271              0.199000      14.915894       0.318784       0.276873   -9999.000000   -9999.000000       0.146900       0.728000
53585     53585     shanxi         113.2500       39.1667           83       173     2012      09        28        272              0.189667      11.596924       0.000000       0.263297       0.144000   -9999.000000       0.130800       0.629000
53585     53585     shanxi         113.2500       39.1667           83       173     2012      09        29        273              0.185458      10.929047       0.000000       0.255760       0.150500   -9999.000000       0.137400       0.726000
53585     53585     shanxi         113.2500       39.1667           83       173     2012      09        30        274              0.180958      11.584595       0.000000       0.249924       0.131000   -9999.000000   -9999.000000       0.534000
53585     53585     shanxi         113.2500       39.1667           83       173     2012      10        01        275              0.177000      12.677338       0.176927       0.244774       0.103000       0.232500       0.096700       0.521000
53585     53585     shanxi         113.2500       39.1667           83       173     2012      10        02        276              0.173125      13.669037       0.000000       0.239679       0.101000   -9999.000000       0.107200       0.457000
53585     53585     shanxi         113.2500       39.1667           83       173     2012      10        03        277              0.169750      14.807587       0.000000       0.235145       0.110000       0.053100       0.099300       0.506000
53585     53585     shanxi         113.2500       39.1667           83       173     2012      10        04        278              0.164875      13.421783       0.317170       0.230426       0.121500   -9999.000000       0.113200       0.829000
53585     53585     shanxi         113.2500       39.1667           83       173     2012      10        05        279              0.163500      10.241180      18.795160       0.234713       0.140000       0.138900       0.120700       0.425000
53585     53585     shanxi         113.2500       39.1667           83       173     2012      10        06        280              0.162708      10.873413       0.000000       0.234314       0.127000       0.276800       0.112800       0.566000
53585     53585     shanxi         113.2500       39.1667           83       173     2012      10        07        281              0.160083      13.104370      19.636936       0.229846       0.116000   -9999.000000       0.100700       0.435000
53585     53585     shanxi         113.2500       39.1667           83       173     2012      10        08        282              0.158583      13.461304       0.766976       0.227420       0.131000       0.164200       0.108200       0.658000
53585     53585     shanxi         113.2500       39.1667           83       173     2012      10        09        283              0.159417      14.576843       0.000000       0.227425       0.109000       0.390700       0.093700       0.606000
53585     53585     shanxi         113.2500       39.1667           83       173     2012      10        10        284              0.157500       9.652100       0.000000       0.224522       0.127000   -9999.000000       0.098800   -9999.000000
53585     53585     shanxi         113.2500       39.1667           83       173     2012      10        11        285              0.156083      10.458679       0.000000       0.221713       0.100000       0.023900       0.095600       0.513000
53585     53585     shanxi         113.2500       39.1667           83       173     2012      10        12        286              0.154417      12.361572       0.000000       0.218290       0.096000       0.145000       0.090800       0.524000
53585     53585     shanxi         113.2500       39.1667           83       173     2012      10        13        287              0.152167      12.770630       0.000000       0.213901       0.101000       0.145400       0.091200       0.580000
53585     53585     shanxi         113.2500       39.1667           83       173     2012      10        14        288              0.148917      10.501129       0.000000       0.211180       0.093000       0.074600       0.097600       0.532000
53585     53585     shanxi         113.2500       39.1667           83       173     2012      10        15        289              0.148167      10.546509       0.157177       0.211407       0.109500   -9999.000000       0.089800   -9999.000000
53585     53585     shanxi         113.2500       39.1667           83       173     2012      10        16        290              0.176792       9.369415       0.000000       0.216459       0.144000   -9999.000000       0.127000       0.842000
53585     53585     shanxi         113.2500       39.1667           83       173     2012      10        17        291              0.169667       6.264008       0.944723       0.210113       0.124000       0.135200   -9999.000000       0.697000
53585     53585     shanxi         113.2500       39.1667           83       173     2012      10        18        292              0.165583       6.405090       0.000000       0.208606   -9999.000000       0.293300       0.091600       0.750000
53585     53585     shanxi         113.2500       39.1667           83       173     2012      10        19        293              0.163542       7.017151       0.000000       0.209574       0.108000       0.153500       0.097400       0.608000
53585     53585     shanxi         113.2500       39.1667           83       173     2012      10        20        294              0.161542       9.140503       0.000000       0.210407       0.103500   -9999.000000       0.092300   -9999.000000
53585     53585     shanxi         113.2500       39.1667           83       173     2012      10        21        295              0.167958      11.164856       0.632701       0.209137   -9999.000000   -9999.000000       0.100500       0.634000
53585     53585     shanxi         113.2500       39.1667           83       173     2012      10        22        296              0.171783       5.657104       0.000000       0.214598   -9999.000000       0.186400       0.107900       0.738000
53585     53585     shanxi         113.2500       39.1667           83       173     2012      10        23        297              0.167792       6.937897       0.000000       0.213072   -9999.000000   -9999.000000       0.095900       0.867000
53585     53585     shanxi         113.2500       39.1667           83       173     2012      10        24        298              0.166250       8.685455       0.000000       0.211864   -9999.000000       0.384100       0.083600       0.551000
53585     53585     shanxi         113.2500       39.1667           83       173     2012      10        25        299              0.000000       9.279968       0.000000       0.208777       0.096000   -9999.000000       0.087800   -9999.000000
53585     53585     shanxi         113.2500       39.1667           83       173     2012      10        26        300              0.160917       9.895050       0.135727       0.206928       0.098500       0.186400       0.082500       0.539000
53585     53585     shanxi         113.2500       39.1667           83       173     2012      10        27        301              0.159167       8.560730       0.000000       0.208096       0.097000       0.390000       0.088300       0.538000
53585     53585     shanxi         113.2500       39.1667           83       173     2012      10        28        302              0.000000       7.633545       0.000000       0.205922       0.092000   -9999.000000   -9999.000000       0.617000
53585     53585     shanxi         113.2500       39.1667           83       173     2012      10        29        303              0.154417       8.820129       0.041913       0.207476   -9999.000000       0.248400       0.068800       0.324000
53585     53585     shanxi         113.2500       39.1667           83       173     2012      10        30        304              0.151792       4.230621       0.000000       0.189480   -9999.000000   -9999.000000       0.072100       0.357000
53585     53585     shanxi         113.2500       39.1667           83       173     2012      10        31        305              0.149375       3.543671       0.000000       0.188968       0.090000       0.244500       0.067500       0.326000
53585     53585     shanxi         113.2500       39.1667           83       173     2012      11        01        306              0.148417       4.169312       0.000000       0.194618       0.088000       0.149900       0.071000       0.414000
53585     53585     shanxi         113.2500       39.1667           83       173     2012      11        02        307              0.146833       5.880280       0.204735       0.202689       0.089000   -9999.000000       0.075600       0.529000
53585     53585     shanxi         113.2500       39.1667           83       173     2012      11        03        308              0.152500       8.086243       0.462748       0.204963   -9999.000000   -9999.000000   -9999.000000       0.455000
53585     53585     shanxi         113.2500       39.1667           83       173     2012      11        04        309              0.158458      -0.150879       0.416220       0.168562   -9999.000000   -9999.000000       0.059500       0.459000
53585     53585     shanxi         113.2500       39.1667           83       173     2012      11        05        310              0.164042      -2.817291       0.000000       0.138530   -9999.000000       0.240300       0.054600       0.495000
53585     53585     shanxi         113.2500       39.1667           83       173     2012      11        06        311              0.162625      -1.992157       0.000000       0.148836       0.105000       0.105400       0.066400       0.515000
53585     53585     shanxi         113.2500       39.1667           83       173     2012      11        07        312              0.161417      -0.300232       0.245004       0.161232   -9999.000000   -9999.000000       0.069300       0.569000
53585     53585     shanxi         113.2500       39.1667           83       173     2012      11        08        313              0.159000       0.275909       0.325177       0.171681   -9999.000000   -9999.000000   -9999.000000   -9999.000000
53585     53585     shanxi         113.2500       39.1667           83       173     2012      11        09        314              0.158000       0.772064       0.977487       0.174374   -9999.000000       0.093600       0.068500       0.552000
53585     53585     shanxi         113.2500       39.1667           83       173     2012      11        10        315              0.162333       2.124329       0.078878       0.194285   -9999.000000       0.194300       0.044900       0.438000
53585     53585     shanxi         113.2500       39.1667           83       173     2012      11        11        316              0.161125      -1.943420       0.000000       0.156271   -9999.000000       0.051500       0.045400       0.527000
53585     53585     shanxi         113.2500       39.1667           83       173     2012      11        12        317              0.155792      -2.966888       0.000000       0.138304   -9999.000000   -9999.000000       0.047400       0.338000
53585     53585     shanxi         113.2500       39.1667           83       173     2012      11        13        318              0.000000      -1.831421       0.758900       0.150275   -9999.000000       0.117600       0.052200   -9999.000000
53585     53585     shanxi         113.2500       39.1667           83       173     2012      11        14        319              0.141304      -2.733521       0.846074       0.143517   -9999.000000       0.095400   -9999.000000       0.464000
53585     53585     shanxi         113.2500       39.1667           83       173     2012      11        15        320              0.144667      -1.507935       0.000000       0.152684   -9999.000000   -9999.000000       0.046600       0.369000
53585     53585     shanxi         113.2500       39.1667           83       173     2012      11        16        321              0.154000      -0.569305       0.000000       0.160650   -9999.000000   -9999.000000       0.049900       0.417000
53585     53585     shanxi         113.2500       39.1667           83       173     2012      11        17        322              0.000000      -2.331207       0.000000       0.146669       0.096000   -9999.000000       0.048500       0.474000
53585     53585     shanxi         113.2500       39.1667           83       173     2012      11        18        323              0.151750      -1.015381       0.000000       0.156264   -9999.000000   -9999.000000       0.057500   -9999.000000
53585     53585     shanxi         113.2500       39.1667           83       173     2012      11        19        324              0.148583      -0.172272       0.000000       0.166892   -9999.000000       0.023700       0.054200       0.508000
53585     53585     shanxi         113.2500       39.1667           83       173     2012      11        20        325              0.146333      -0.461700       0.000000       0.162888   -9999.000000   -9999.000000       0.054000       0.366000
53585     53585     shanxi         113.2500       39.1667           83       173     2012      11        21        326              0.148292      -0.111328       0.000000       0.166096   -9999.000000   -9999.000000       0.051100       0.684000
53585     53585     shanxi         113.2500       39.1667           83       173     2012      11        22        327              0.151583       1.485565       0.000000       0.185052   -9999.000000   -9999.000000       0.052600       0.266000
53585     53585     shanxi         113.2500       39.1667           83       173     2012      11        23        328              0.130375      -2.772736       0.000000       0.149500   -9999.000000       0.172800       0.053200   -9999.000000
53585     53585     shanxi         113.2500       39.1667           83       173     2012      11        24        329              0.103708      -3.661499       0.000000       0.135946   -9999.000000       0.086900       0.053300       0.269000
53585     53585     shanxi         113.2500       39.1667           83       173     2012      11        25        330              0.102792      -1.147949       0.000000       0.154364   -9999.000000   -9999.000000       0.049800       0.228000
53585     53585     shanxi         113.2500       39.1667           83       173     2012      11        26        331              0.097458      -3.216583       0.340436       0.141076   -9999.000000   -9999.000000   -9999.000000       0.257000
53585     53585     shanxi         113.2500       39.1667           83       173     2012      11        27        332              0.097500      -2.811066       0.000000       0.139218   -9999.000000   -9999.000000       0.049300       0.210000
53585     53585     shanxi         113.2500       39.1667           83       173     2012      11        28        333              0.094458      -1.644836       0.000000       0.156448   -9999.000000       0.155400       0.050300       0.283000
53585     53585     shanxi         113.2500       39.1667           83       173     2012      11        29        334              0.091125      -5.493652       0.000000       0.126153   -9999.000000       0.058900       0.047900       0.245000
53585     53585     shanxi         113.2500       39.1667           83       173     2012      11        30        335              0.091042      -4.799896       0.000000       0.131979   -9999.000000   -9999.000000       0.048900       0.083000
53585     53585     shanxi         113.2500       39.1667           83       173     2012      12        01        336              0.090167      -5.261505       0.000000       0.124293   -9999.000000       0.089800   -9999.000000       0.246000
53585     53585     shanxi         113.2500       39.1667           83       173     2012      12        02        337              0.090000      -4.610565       0.000000       0.123316   -9999.000000   -9999.000000       0.045900       0.206000
53585     53585     shanxi         113.2500       39.1667           83       173     2012      12        03        338              0.089583      -3.706970       0.000000       0.135347   -9999.000000       0.211900       0.057300       0.112000
53585     53585     shanxi         113.2500       39.1667           83       173     2012      12        04        339              0.089217      -7.023926       0.000000       0.118464   -9999.000000       0.106800       0.048900       0.102000
53585     53585     shanxi         113.2500       39.1667           83       173     2012      12        05        340              0.087833      -5.901276       0.000000       0.121508   -9999.000000   -9999.000000       0.045500       0.080000
53585     53585     shanxi         113.2500       39.1667           83       173     2012      12        06        341              0.085917      -9.496887       0.000000       0.110887   -9999.000000       0.099600       0.047200       0.089000
53585     53585     shanxi         113.2500       39.1667           83       173     2012      12        07        342              0.086500      -7.572540       0.000000       0.112053   -9999.000000   -9999.000000       0.051200   -9999.000000
53585     53585     shanxi         113.2500       39.1667           83       173     2012      12        08        343              0.085042      -9.751801       0.000000       0.110817   -9999.000000   -9999.000000       0.045900       0.070000
53585     53585     shanxi         113.2500       39.1667           83       173     2012      12        09        344              0.084958     -11.910828       0.000000       0.107005   -9999.000000   -9999.000000       0.049600       0.134000
53585     53585     shanxi         113.2500       39.1667           83       173     2012      12        10        345              0.085542      -8.658234       0.000000       0.107818   -9999.000000   -9999.000000       0.040200       0.220000
53585     53585     shanxi         113.2500       39.1667           83       173     2012      12        11        346              0.085500      -8.058228       0.000000       0.112497   -9999.000000   -9999.000000       0.046600       0.151000
53585     53585     shanxi         113.2500       39.1667           83       173     2012      12        12        347              0.085208      -7.867981       0.000000       0.109912   -9999.000000   -9999.000000   -9999.000000   -9999.000000
53585     53585     shanxi         113.2500       39.1667           83       173     2012      12        13        348              0.085667      -7.426758       0.000000       0.114386   -9999.000000   -9999.000000       0.042500       0.066000
53585     53585     shanxi         113.2500       39.1667           83       173     2012      12        14        349              0.086417      -7.279419       0.000000       0.110218   -9999.000000   -9999.000000       0.041200       0.125000
53585     53585     shanxi         113.2500       39.1667           83       173     2012      12        15        350              0.000000      -5.528137       0.000000       0.116848   -9999.000000   -9999.000000       0.044300       0.183000
53585     53585     shanxi         113.2500       39.1667           83       173     2012      12        16        351              0.087250      -4.005157       0.000000       0.129859   -9999.000000   -9999.000000       0.044500       0.257000
53585     53585     shanxi         113.2500       39.1667           83       173     2012      12        17        352              0.086125      -3.689850       0.000000       0.133354   -9999.000000       0.049700       0.041700   -9999.000000
53585     53585     shanxi         113.2500       39.1667           83       173     2012      12        18        353              0.084875      -8.029694       0.000000       0.114346   -9999.000000   -9999.000000   -9999.000000       0.099000
53585     53585     shanxi         113.2500       39.1667           83       173     2012      12        19        354              0.085000      -8.330566       0.000000       0.108526   -9999.000000   -9999.000000       0.038500       0.073000
53585     53585     shanxi         113.2500       39.1667           83       173     2012      12        20        355              0.000000      -7.287476       0.000000       0.114025   -9999.000000   -9999.000000       0.047600       0.186000
53585     53585     shanxi         113.2500       39.1667           83       173     2012      12        21        356              0.085458      -7.291840       0.000000       0.111432   -9999.000000   -9999.000000       0.044300       0.128000
53585     53585     shanxi         113.2500       39.1667           83       173     2012      12        22        357              0.084000      -8.562622       0.000000       0.111053   -9999.000000   -9999.000000       0.042200   -9999.000000
53585     53585     shanxi         113.2500       39.1667           83       173     2012      12        23        358              0.081583     -13.305328       0.000000       0.107517   -9999.000000   -9999.000000   -9999.000000       0.002000
53585     53585     shanxi         113.2500       39.1667           83       173     2012      12        24        359              0.080905     -15.256378       0.000000       0.102903   -9999.000000   -9999.000000       0.041900       0.038000
53585     53585     shanxi         113.2500       39.1667           83       173     2012      12        25        360              0.081083     -12.902588       0.000000       0.103445   -9999.000000   -9999.000000       0.040000       0.151000
53585     53585     shanxi         113.2500       39.1667           83       173     2012      12        26        361              0.000000     -11.421906       0.000000       0.103713   -9999.000000   -9999.000000       0.044700       0.132000
53585     53585     shanxi         113.2500       39.1667           83       173     2012      12        27        362              0.081833      -9.473663       0.000000       0.105601   -9999.000000   -9999.000000       0.039500       0.087000
53585     53585     shanxi         113.2500       39.1667           83       173     2012      12        28        363              0.081000      -8.325409       0.000000       0.107753   -9999.000000   -9999.000000       0.038600       0.031000
53585     53585     shanxi         113.2500       39.1667           83       173     2012      12        29        364              0.000000      -9.734344       0.000000       0.106458   -9999.000000   -9999.000000   -9999.000000       0.087000
53585     53585     shanxi         113.2500       39.1667           83       173     2012      12        30        365              0.000000     -12.846497       0.000000       0.105676   -9999.000000   -9999.000000       0.036900       0.083000
53585     53585     shanxi         113.2500       39.1667           83       173     2012      12        31        366              0.081000     -11.157349       0.000000       0.105806   -9999.000000   -9999.000000       0.041200   -9999.000000
