# Supplementary material for: Research on Fusing Multisatellite Soil Moisture Data Based on Bayesian Model Averaging
Source: Hindawi journal article supplement (doi:10.1155/2018/9310838), 2018-06-25
Supplement: f1 [file 9310838.f1.zip › 2012_sm00-10cm_daily_ZDB_ZHY_53644_366days_allin.txt]

53644     53644     neimenggu      108.8344       38.5947           86       155     2012      01        01        001              0.000000   -9999.000000       0.000000   -9999.000000   -9999.000000   -9999.000000       0.017000   -9999.000000
53644     53644     neimenggu      108.8344       38.5947           86       155     2012      01        02        002              0.000000      -7.525665       0.000000       0.076145   -9999.000000   -9999.000000   -9999.000000       0.262000
53644     53644     neimenggu      108.8344       38.5947           86       155     2012      01        03        003              0.000000     -10.200989       0.000000       0.074831   -9999.000000   -9999.000000       0.010000   -9999.000000
53644     53644     neimenggu      108.8344       38.5947           86       155     2012      01        04        004              0.000000     -12.394257       0.000000       0.073826   -9999.000000   -9999.000000       0.013500       0.259000
53644     53644     neimenggu      108.8344       38.5947           86       155     2012      01        05        005              0.000000     -12.096680       0.000000       0.073022   -9999.000000   -9999.000000       0.011800       0.356000
53644     53644     neimenggu      108.8344       38.5947           86       155     2012      01        06        006              0.000000     -10.591125       0.000000       0.073306   -9999.000000   -9999.000000       0.013900       0.230000
53644     53644     neimenggu      108.8344       38.5947           86       155     2012      01        07        007              0.000000      -8.376099       0.000000       0.074226   -9999.000000   -9999.000000       0.017400       0.236000
53644     53644     neimenggu      108.8344       38.5947           86       155     2012      01        08        008              0.000000      -7.600372       0.000000       0.077681   -9999.000000   -9999.000000   -9999.000000   -9999.000000
53644     53644     neimenggu      108.8344       38.5947           86       155     2012      01        09        009              0.000000      -8.171661       0.000000       0.075074   -9999.000000   -9999.000000   -9999.000000       0.224000
53644     53644     neimenggu      108.8344       38.5947           86       155     2012      01        10        010              0.000000      -8.301025       0.000000       0.074865   -9999.000000   -9999.000000       0.010000       0.368000
53644     53644     neimenggu      108.8344       38.5947           86       155     2012      01        11        011              0.000000      -8.877716       0.000000       0.074070   -9999.000000   -9999.000000       0.014400       0.302000
53644     53644     neimenggu      108.8344       38.5947           86       155     2012      01        12        012              0.000000      -9.191742       0.000000       0.073588   -9999.000000   -9999.000000       0.015900       0.205000
53644     53644     neimenggu      108.8344       38.5947           86       155     2012      01        13        013              0.000000      -8.432159       0.000000       0.074956   -9999.000000   -9999.000000       0.012500   -9999.000000
53644     53644     neimenggu      108.8344       38.5947           86       155     2012      01        14        014              0.000000      -8.136841       0.000000       0.073979   -9999.000000   -9999.000000       0.010000       0.268000
53644     53644     neimenggu      108.8344       38.5947           86       155     2012      01        15        015              0.000000      -8.097992       0.000000       0.074067   -9999.000000   -9999.000000       0.010000       0.229000
53644     53644     neimenggu      108.8344       38.5947           86       155     2012      01        16        016              0.000000      -7.102264       0.000000       0.075803   -9999.000000   -9999.000000       0.010000       0.255000
53644     53644     neimenggu      108.8344       38.5947           86       155     2012      01        17        017              0.000000      -6.045685       0.000000       0.083502   -9999.000000   -9999.000000       0.010000       0.186000
53644     53644     neimenggu      108.8344       38.5947           86       155     2012      01        18        018              0.000000      -6.365875       0.000000       0.083147   -9999.000000   -9999.000000       0.012700       0.232000
53644     53644     neimenggu      108.8344       38.5947           86       155     2012      01        19        019              0.000000      -5.249207       0.000000       0.087431   -9999.000000   -9999.000000   -9999.000000       0.375000
53644     53644     neimenggu      108.8344       38.5947           86       155     2012      01        20        020              0.000000      -5.795685       0.000000       0.085579   -9999.000000   -9999.000000       0.010000       0.246000
53644     53644     neimenggu      108.8344       38.5947           86       155     2012      01        21        021              0.000000      -8.945129       0.000000       0.077692   -9999.000000   -9999.000000       0.010000       0.150000
53644     53644     neimenggu      108.8344       38.5947           86       155     2012      01        22        022              0.000000     -12.126038       0.000000       0.074720   -9999.000000   -9999.000000       0.010000   -9999.000000
53644     53644     neimenggu      108.8344       38.5947           86       155     2012      01        23        023              0.000000     -12.980988       0.000000       0.073435   -9999.000000   -9999.000000       0.010000       0.261000
53644     53644     neimenggu      108.8344       38.5947           86       155     2012      01        24        024              0.000000     -12.808167       0.000000       0.073113   -9999.000000   -9999.000000   -9999.000000       0.291000
53644     53644     neimenggu      108.8344       38.5947           86       155     2012      01        25        025              0.000000     -12.520081       0.000000       0.072899   -9999.000000   -9999.000000   -9999.000000       0.256000
53644     53644     neimenggu      108.8344       38.5947           86       155     2012      01        26        026              0.000000     -10.045502       0.000000       0.073397   -9999.000000   -9999.000000       0.010000       0.239000
53644     53644     neimenggu      108.8344       38.5947           86       155     2012      01        27        027              0.000000      -8.471771       0.000000       0.074954   -9999.000000   -9999.000000       0.010000   -9999.000000
53644     53644     neimenggu      108.8344       38.5947           86       155     2012      01        28        028              0.000000      -6.778351       0.000000       0.078871   -9999.000000   -9999.000000       0.013500       0.302000
53644     53644     neimenggu      108.8344       38.5947           86       155     2012      01        29        029              0.000000      -7.241119       0.000000       0.078162   -9999.000000   -9999.000000       0.016700       0.316000
53644     53644     neimenggu      108.8344       38.5947           86       155     2012      01        30        030              0.000000      -6.527435       0.000000       0.081013   -9999.000000   -9999.000000       0.020400       0.312000
53644     53644     neimenggu      108.8344       38.5947           86       155     2012      01        31        031              0.000000      -4.763000       0.000000       0.092008   -9999.000000   -9999.000000       0.010000       0.248000
53644     53644     neimenggu      108.8344       38.5947           86       155     2012      02        01        032              0.000000      -5.354095       0.000000       0.104826   -9999.000000   -9999.000000       0.010300   -9999.000000
53644     53644     neimenggu      108.8344       38.5947           86       155     2012      02        02        033              0.000000     -10.003326       0.000000       0.076084   -9999.000000   -9999.000000       0.019500       0.294000
53644     53644     neimenggu      108.8344       38.5947           86       155     2012      02        03        034              0.000000      -9.018219       0.000000       0.075308   -9999.000000   -9999.000000       0.015600       0.349000
53644     53644     neimenggu      108.8344       38.5947           86       155     2012      02        04        035              0.000000      -6.425385       0.000000       0.084371   -9999.000000   -9999.000000       0.027800       0.253000
53644     53644     neimenggu      108.8344       38.5947           86       155     2012      02        05        036              0.000000      -4.676361       0.000000       0.094683   -9999.000000   -9999.000000   -9999.000000       0.293000
53644     53644     neimenggu      108.8344       38.5947           86       155     2012      02        06        037              0.000000      -4.968231       0.000000       0.099002   -9999.000000   -9999.000000       0.013500   -9999.000000
53644     53644     neimenggu      108.8344       38.5947           86       155     2012      02        07        038              0.000000     -11.772980       0.000000       0.075677   -9999.000000   -9999.000000       0.019100       0.271000
53644     53644     neimenggu      108.8344       38.5947           86       155     2012      02        08        039              0.000000     -10.851776       0.000000       0.073428   -9999.000000   -9999.000000       0.021800       0.282000
53644     53644     neimenggu      108.8344       38.5947           86       155     2012      02        09        040              0.000000     -10.195984       0.000000       0.073613   -9999.000000   -9999.000000       0.027900       0.192000
53644     53644     neimenggu      108.8344       38.5947           86       155     2012      02        10        041              0.000000      -8.901062       0.000000       0.074346   -9999.000000   -9999.000000       0.033600       0.186000
53644     53644     neimenggu      108.8344       38.5947           86       155     2012      02        11        042              0.000000      -7.340088       0.000000       0.079318   -9999.000000   -9999.000000       0.033900   -9999.000000
53644     53644     neimenggu      108.8344       38.5947           86       155     2012      02        12        043              0.000000      -4.311127       0.000000       0.097586   -9999.000000   -9999.000000   -9999.000000       0.245000
53644     53644     neimenggu      108.8344       38.5947           86       155     2012      02        13        044              0.000000      -2.871429       0.000000       0.108244   -9999.000000   -9999.000000   -9999.000000       0.312000
53644     53644     neimenggu      108.8344       38.5947           86       155     2012      02        14        045              0.000000      -1.685822       0.000000       0.123809   -9999.000000       0.336700   -9999.000000       0.152000
53644     53644     neimenggu      108.8344       38.5947           86       155     2012      02        15        046              0.000000      -2.230591       0.000000       0.121483   -9999.000000   -9999.000000       0.048100       0.124000
53644     53644     neimenggu      108.8344       38.5947           86       155     2012      02        16        047              0.000000      -4.571075       0.000000       0.106125   -9999.000000   -9999.000000       0.023600       0.268000
53644     53644     neimenggu      108.8344       38.5947           86       155     2012      02        17        048              0.000000      -6.235077       0.000000       0.091763   -9999.000000   -9999.000000       0.037300       0.286000
53644     53644     neimenggu      108.8344       38.5947           86       155     2012      02        18        049              0.000000      -7.080841      10.736901       0.087412   -9999.000000   -9999.000000       0.026400       0.211000
53644     53644     neimenggu      108.8344       38.5947           86       155     2012      02        19        050              0.000000      -5.870880       0.000000       0.091913   -9999.000000   -9999.000000       0.034300       0.152000
53644     53644     neimenggu      108.8344       38.5947           86       155     2012      02        20        051              0.000000      -2.380493       0.000000       0.117397   -9999.000000   -9999.000000       0.076300   -9999.000000
53644     53644     neimenggu      108.8344       38.5947           86       155     2012      02        21        052              0.000000       0.233368       0.455488       0.139274   -9999.000000   -9999.000000   -9999.000000       0.436000
53644     53644     neimenggu      108.8344       38.5947           86       155     2012      02        22        053              0.000000       2.119110       0.484028       0.160447       0.079000   -9999.000000   -9999.000000       0.333000
53644     53644     neimenggu      108.8344       38.5947           86       155     2012      02        23        054              0.000000       1.038879       0.000000       0.151118       0.073000   -9999.000000       0.062300       0.314000
53644     53644     neimenggu      108.8344       38.5947           86       155     2012      02        24        055              0.000000       1.162842       0.000000       0.154421   -9999.000000       0.112500       0.049000       0.121000
53644     53644     neimenggu      108.8344       38.5947           86       155     2012      02        25        056              0.000000      -2.122742       0.000000       0.121835   -9999.000000   -9999.000000       0.071000   -9999.000000
53644     53644     neimenggu      108.8344       38.5947           86       155     2012      02        26        057              0.000000      -5.380829       0.000000       0.087357   -9999.000000   -9999.000000       0.077600       0.135000
53644     53644     neimenggu      108.8344       38.5947           86       155     2012      02        27        058              0.000000      -1.616119       0.000000       0.124583       0.085000   -9999.000000   -9999.000000       0.204000
53644     53644     neimenggu      108.8344       38.5947           86       155     2012      02        28        059              0.000000       0.611694       0.265291       0.142887       0.083000   -9999.000000   -9999.000000       0.280000
53644     53644     neimenggu      108.8344       38.5947           86       155     2012      02        29        060              0.000000   -9999.000000       0.000000   -9999.000000       0.088000   -9999.000000   -9999.000000   -9999.000000
53644     53644     neimenggu      108.8344       38.5947           86       155     2012      03        01        061              0.000000       1.641632       0.000000       0.154754       0.088000   -9999.000000       0.041500   -9999.000000
53644     53644     neimenggu      108.8344       38.5947           86       155     2012      03        02        062              0.000000       2.332153       0.000000       0.160897   -9999.000000   -9999.000000       0.059400       0.232000
53644     53644     neimenggu      108.8344       38.5947           86       155     2012      03        03        063              0.000000       0.669434       0.000000       0.152791   -9999.000000   -9999.000000       0.066500       0.340000
53644     53644     neimenggu      108.8344       38.5947           86       155     2012      03        04        064              0.000000       0.182129       0.000000       0.144738   -9999.000000   -9999.000000   -9999.000000       0.350000
53644     53644     neimenggu      108.8344       38.5947           86       155     2012      03        05        065              0.000000       0.092712       0.000000       0.146400       0.106000   -9999.000000       0.038800       0.114000
53644     53644     neimenggu      108.8344       38.5947           86       155     2012      03        06        066              0.000000      -2.226440       0.000000       0.121986       0.089000   -9999.000000       0.063100   -9999.000000
53644     53644     neimenggu      108.8344       38.5947           86       155     2012      03        07        067              0.000000       0.039612       0.000000       0.138800   -9999.000000       0.033900       0.053000       0.408000
53644     53644     neimenggu      108.8344       38.5947           86       155     2012      03        08        068              0.000000       0.718872       0.000000       0.143880   -9999.000000   -9999.000000       0.081500       0.202000
53644     53644     neimenggu      108.8344       38.5947           86       155     2012      03        09        069              0.000000       0.491272       0.000000       0.141407       0.071000   -9999.000000       0.095900       0.423000
53644     53644     neimenggu      108.8344       38.5947           86       155     2012      03        10        070              0.000000       1.720703       0.000000       0.154700       0.087000   -9999.000000   -9999.000000       0.101000
53644     53644     neimenggu      108.8344       38.5947           86       155     2012      03        11        071              0.000000       0.116486       0.000000       0.140265       0.071000   -9999.000000       0.054400   -9999.000000
53644     53644     neimenggu      108.8344       38.5947           86       155     2012      03        12        072              0.000000       1.341675       0.000000       0.147593   -9999.000000       0.034000       0.065200       0.182000
53644     53644     neimenggu      108.8344       38.5947           86       155     2012      03        13        073              0.000000       2.528351       0.234529       0.157847   -9999.000000   -9999.000000       0.076500       0.185000
53644     53644     neimenggu      108.8344       38.5947           86       155     2012      03        14        074              0.000000       3.961395       0.000000       0.164570       0.080000   -9999.000000   -9999.000000       0.197000
53644     53644     neimenggu      108.8344       38.5947           86       155     2012      03        15        075              0.000000       5.349731       0.000000       0.182717       0.079000   -9999.000000       0.092500       0.141000
53644     53644     neimenggu      108.8344       38.5947           86       155     2012      03        16        076              0.000000       3.339020       0.000000       0.179938       0.067000   -9999.000000       0.055400       0.370000
53644     53644     neimenggu      108.8344       38.5947           86       155     2012      03        17        077              0.000000       6.270081       1.263404       0.185551       0.072000       0.113200       0.045300       0.257000
53644     53644     neimenggu      108.8344       38.5947           86       155     2012      03        18        078              0.000000       6.102875       0.000000       0.174922   -9999.000000   -9999.000000       0.057600       0.238000
53644     53644     neimenggu      108.8344       38.5947           86       155     2012      03        19        079              0.000000       2.955902       3.778765       0.176152       0.075000   -9999.000000       0.067800       0.187000
53644     53644     neimenggu      108.8344       38.5947           86       155     2012      03        20        080              0.000000       5.664307       0.000000       0.189141       0.079000   -9999.000000       0.088000   -9999.000000
53644     53644     neimenggu      108.8344       38.5947           86       155     2012      03        21        081              0.000000       4.898163       0.000000       0.219924   -9999.000000   -9999.000000   -9999.000000       0.582000
53644     53644     neimenggu      108.8344       38.5947           86       155     2012      03        22        082              0.000000       2.804596       0.000000       0.202947       0.096000       0.150500       0.063200       0.301000
53644     53644     neimenggu      108.8344       38.5947           86       155     2012      03        23        083              0.000000       3.914398       5.350838       0.191890   -9999.000000   -9999.000000       0.050100       0.283000
53644     53644     neimenggu      108.8344       38.5947           86       155     2012      03        24        084              0.000000       4.354797       0.939031       0.190028   -9999.000000   -9999.000000       0.077800       0.042000
53644     53644     neimenggu      108.8344       38.5947           86       155     2012      03        25        085              0.000000       5.418091       1.092126       0.221104       0.070000       0.029800       0.091700   -9999.000000
53644     53644     neimenggu      108.8344       38.5947           86       155     2012      03        26        086              0.000000       6.999542       0.000000       0.210260       0.076000   -9999.000000       0.091200       0.243000
53644     53644     neimenggu      108.8344       38.5947           86       155     2012      03        27        087              0.000000       8.500061       0.000000       0.211748       0.063000       0.024100   -9999.000000       0.155000
53644     53644     neimenggu      108.8344       38.5947           86       155     2012      03        28        088              0.000000       9.408752      11.027479       0.211269   -9999.000000   -9999.000000       0.093800       0.277000
53644     53644     neimenggu      108.8344       38.5947           86       155     2012      03        29        089              0.000000       7.048096       0.000000       0.262238   -9999.000000   -9999.000000       0.068500       0.232000
53644     53644     neimenggu      108.8344       38.5947           86       155     2012      03        30        090              0.000000       8.345520       0.951235       0.235803       0.064000       0.068700       0.100200   -9999.000000
53644     53644     neimenggu      108.8344       38.5947           86       155     2012      03        31        091              0.000000       5.522919       0.177150       0.221345       0.081000   -9999.000000       0.085800       0.275000
53644     53644     neimenggu      108.8344       38.5947           86       155     2012      04        01        092              0.000000       9.084106       0.328013       0.229737       0.078000   -9999.000000       0.105000       0.199000
53644     53644     neimenggu      108.8344       38.5947           86       155     2012      04        02        093              0.000000       8.887726       0.176191       0.227852   -9999.000000   -9999.000000       0.095400       0.277000
53644     53644     neimenggu      108.8344       38.5947           86       155     2012      04        03        094              0.000000       6.348541       0.141359       0.207716   -9999.000000       0.220400       0.067100       0.107000
53644     53644     neimenggu      108.8344       38.5947           86       155     2012      04        04        095              0.000000       8.099518       0.000000       0.216455       0.073000       0.068600       0.061300   -9999.000000
53644     53644     neimenggu      108.8344       38.5947           86       155     2012      04        05        096              0.000000       9.936981       0.000000       0.212586       0.085000   -9999.000000       0.084300       0.167000
53644     53644     neimenggu      108.8344       38.5947           86       155     2012      04        06        097              0.000000       9.202209       0.000000       0.209573       0.087000       0.076700       0.099400       0.145000
53644     53644     neimenggu      108.8344       38.5947           86       155     2012      04        07        098              0.000000      11.187256       0.000000       0.205483       0.076500       0.084100   -9999.000000       0.212000
53644     53644     neimenggu      108.8344       38.5947           86       155     2012      04        08        099              0.000000      12.453064       0.000000       0.201232       0.071000   -9999.000000       0.071200       0.102000
53644     53644     neimenggu      108.8344       38.5947           86       155     2012      04        09        100              0.000000      13.938324       0.000000       0.196857       0.072500       0.084300       0.091000   -9999.000000
53644     53644     neimenggu      108.8344       38.5947           86       155     2012      04        10        101              0.000000      13.996765       0.023771       0.195634       0.074500   -9999.000000       0.071400       0.216000
53644     53644     neimenggu      108.8344       38.5947           86       155     2012      04        11        102              0.000000      12.272858       0.479817       0.193717   -9999.000000   -9999.000000       0.090500       0.412000
53644     53644     neimenggu      108.8344       38.5947           86       155     2012      04        12        103              0.000000       3.098083       0.941739       0.181366       0.117000   -9999.000000       0.138600       0.223000
53644     53644     neimenggu      108.8344       38.5947           86       155     2012      04        13        104              0.000000       7.625244       0.085056       0.206494   -9999.000000   -9999.000000   -9999.000000       0.161000
53644     53644     neimenggu      108.8344       38.5947           86       155     2012      04        14        105              0.000000      12.060791       0.000000       0.201327       0.053000   -9999.000000       0.058800       0.285000
53644     53644     neimenggu      108.8344       38.5947           86       155     2012      04        15        106              0.000000      13.288300       0.000000       0.194859       0.069000   -9999.000000       0.058300       0.268000
53644     53644     neimenggu      108.8344       38.5947           86       155     2012      04        16        107              0.000000      14.056213       0.000000       0.188238       0.064000       0.090200       0.092800       0.236000
53644     53644     neimenggu      108.8344       38.5947           86       155     2012      04        17        108              0.000000      14.554504       0.000000       0.182864       0.082000       0.110600       0.106800       0.162000
53644     53644     neimenggu      108.8344       38.5947           86       155     2012      04        18        109              0.000000      14.798767       0.199027       0.181409       0.062000   -9999.000000   -9999.000000   -9999.000000
53644     53644     neimenggu      108.8344       38.5947           86       155     2012      04        19        110              0.000000      15.156189       0.000000       0.177794       0.062000       0.002500       0.058800       0.286000
53644     53644     neimenggu      108.8344       38.5947           86       155     2012      04        20        111              0.000000      14.257538       0.000000       0.173193       0.057000   -9999.000000       0.067900       0.204000
53644     53644     neimenggu      108.8344       38.5947           86       155     2012      04        21        112              0.000000      15.207489       0.107054       0.170004       0.054000   -9999.000000       0.081600       0.258000
53644     53644     neimenggu      108.8344       38.5947           86       155     2012      04        22        113              0.000000      16.513702       0.000000       0.165439       0.080000       0.060900   -9999.000000       0.150000
53644     53644     neimenggu      108.8344       38.5947           86       155     2012      04        23        114              0.000000      19.466461       8.960988       0.159631       0.064000   -9999.000000       0.103400   -9999.000000
53644     53644     neimenggu      108.8344       38.5947           86       155     2012      04        24        115              0.000000      18.431305       0.000000       0.184833       0.062000   -9999.000000   -9999.000000       0.142000
53644     53644     neimenggu      108.8344       38.5947           86       155     2012      04        25        116              0.000000      12.366516       0.000000       0.221277       0.064500   -9999.000000       0.059500       0.126000
53644     53644     neimenggu      108.8344       38.5947           86       155     2012      04        26        117              0.000000      11.987610       0.000000       0.203544       0.065000   -9999.000000       0.062900       0.272000
53644     53644     neimenggu      108.8344       38.5947           86       155     2012      04        27        118              0.000000      15.608826       0.000000       0.192669       0.057000       0.128500       0.101100       0.133000
53644     53644     neimenggu      108.8344       38.5947           86       155     2012      04        28        119              0.000000      16.298737       0.000000       0.183993       0.061000   -9999.000000       0.083700   -9999.000000
53644     53644     neimenggu      108.8344       38.5947           86       155     2012      04        29        120              0.000000      18.186859       0.000000       0.177486       0.053000   -9999.000000       0.091400       0.139000
53644     53644     neimenggu      108.8344       38.5947           86       155     2012      04        30        121              0.000000      21.375610      20.448071       0.170162       0.111500       0.108800   -9999.000000       0.783000
53644     53644     neimenggu      108.8344       38.5947           86       155     2012      05        01        122              0.000000      18.315033       2.093686       0.238768       0.100500   -9999.000000       0.094900       0.449000
53644     53644     neimenggu      108.8344       38.5947           86       155     2012      05        02        123              0.000000      16.584564       0.000000       0.263155       0.084000   -9999.000000       0.089300       0.335000
53644     53644     neimenggu      108.8344       38.5947           86       155     2012      05        03        124              0.000000      19.042084       0.000000       0.240707       0.079000   -9999.000000       0.104200   -9999.000000
53644     53644     neimenggu      108.8344       38.5947           86       155     2012      05        04        125              0.000000      19.816803       0.000000       0.228762       0.062000   -9999.000000       0.104600       0.378000
53644     53644     neimenggu      108.8344       38.5947           86       155     2012      05        05        126              0.000000      21.421600       0.000000       0.217369       0.070000       0.090500       0.066600       0.262000
53644     53644     neimenggu      108.8344       38.5947           86       155     2012      05        06        127              0.000000      21.753265       0.000000       0.206186       0.060000   -9999.000000       0.055300       0.271000
53644     53644     neimenggu      108.8344       38.5947           86       155     2012      05        07        128              0.000000      21.781494       0.238287       0.199149   -9999.000000       0.103800       0.061200       0.170000
53644     53644     neimenggu      108.8344       38.5947           86       155     2012      05        08        129              0.080000      21.805420       1.717499       0.197773       0.054000   -9999.000000       0.093500   -9999.000000
53644     53644     neimenggu      108.8344       38.5947           86       155     2012      05        09        130              0.000000      22.262909       1.423845       0.203073   -9999.000000   -9999.000000       0.086200       0.463000
53644     53644     neimenggu      108.8344       38.5947           86       155     2012      05        10        131              0.000000      22.695557      12.803844       0.209714       0.129000   -9999.000000       0.093400       0.654000
53644     53644     neimenggu      108.8344       38.5947           86       155     2012      05        11        132              0.000000      22.153595       0.000000       0.244116       0.074500   -9999.000000   -9999.000000       0.206000
53644     53644     neimenggu      108.8344       38.5947           86       155     2012      05        12        133              0.000000      18.076080       0.000000       0.243139       0.068000   -9999.000000       0.065400       0.174000
53644     53644     neimenggu      108.8344       38.5947           86       155     2012      05        13        134              0.000000      16.496246       0.000000       0.225796       0.064000       0.155900       0.091400       0.251000
53644     53644     neimenggu      108.8344       38.5947           86       155     2012      05        14        135              0.000000      13.955353       0.000000       0.218132       0.061000   -9999.000000       0.090900       0.282000
53644     53644     neimenggu      108.8344       38.5947           86       155     2012      05        15        136              0.000000      15.822266       0.000000       0.208440       0.055000       0.064200       0.088800       0.331000
53644     53644     neimenggu      108.8344       38.5947           86       155     2012      05        16        137              0.000000      17.822205       0.000000       0.199639       0.058500   -9999.000000       0.109400       0.139000
53644     53644     neimenggu      108.8344       38.5947           86       155     2012      05        17        138              0.000000      18.235901       0.000000       0.192111       0.048500   -9999.000000       0.091700   -9999.000000
53644     53644     neimenggu      108.8344       38.5947           86       155     2012      05        18        139              0.000000      20.826935       0.230285       0.184314       0.059000   -9999.000000       0.070800       0.353000
53644     53644     neimenggu      108.8344       38.5947           86       155     2012      05        19        140              0.000000      22.352844       0.000000       0.178019       0.072000   -9999.000000       0.086900       0.272000
53644     53644     neimenggu      108.8344       38.5947           86       155     2012      05        20        141              0.000000      24.071045       6.735415       0.170819   -9999.000000   -9999.000000       0.096900       0.292000
53644     53644     neimenggu      108.8344       38.5947           86       155     2012      05        21        142              0.000000      23.572296       3.430705       0.185953       0.114000   -9999.000000       0.205700       0.475000
53644     53644     neimenggu      108.8344       38.5947           86       155     2012      05        22        143              0.000000      14.946869       0.000000       0.244040       0.074000   -9999.000000       0.094400   -9999.000000
53644     53644     neimenggu      108.8344       38.5947           86       155     2012      05        23        144              0.000000      17.839447       0.000000       0.218660   -9999.000000       0.220700       0.093500       0.311000
53644     53644     neimenggu      108.8344       38.5947           86       155     2012      05        24        145              0.000000      16.266968       0.000000       0.210291       0.063000   -9999.000000       0.065100       0.270000
53644     53644     neimenggu      108.8344       38.5947           86       155     2012      05        25        146              0.000000      19.346710       0.041301       0.200839       0.054000       0.101900       0.074000       0.363000
53644     53644     neimenggu      108.8344       38.5947           86       155     2012      05        26        147              0.000000      20.153320       0.000000       0.192259       0.068000   -9999.000000       0.069600       0.229000
53644     53644     neimenggu      108.8344       38.5947           86       155     2012      05        27        148              0.000000      22.028046       0.000000       0.182515       0.068500   -9999.000000       0.092900   -9999.000000
53644     53644     neimenggu      108.8344       38.5947           86       155     2012      05        28        149              0.000000      23.834747      29.414293       0.172626       0.060000   -9999.000000   -9999.000000       0.338000
53644     53644     neimenggu      108.8344       38.5947           86       155     2012      05        29        150              0.000000      20.543732       0.000000       0.255949       0.073000   -9999.000000       0.087100       0.403000
53644     53644     neimenggu      108.8344       38.5947           86       155     2012      05        30        151              0.000000      18.579193       0.000000       0.262500       0.062000   -9999.000000       0.076600   -9999.000000
53644     53644     neimenggu      108.8344       38.5947           86       155     2012      05        31        152              0.000000      19.357941       0.587362       0.242271       0.079000   -9999.000000       0.091700   -9999.000000
53644     53644     neimenggu      108.8344       38.5947           86       155     2012      06        01        153              0.000000      21.451843       0.000000       0.234350       0.060000   -9999.000000       0.082400   -9999.000000
53644     53644     neimenggu      108.8344       38.5947           86       155     2012      06        02        154              0.000000      21.606567      11.942526       0.221884       0.084500       0.150100       0.083700       0.647000
53644     53644     neimenggu      108.8344       38.5947           86       155     2012      06        03        155              0.000000      19.929291       0.000000       0.271599       0.072000   -9999.000000   -9999.000000       0.397000
53644     53644     neimenggu      108.8344       38.5947           86       155     2012      06        04        156              0.000000      22.066742       0.000000       0.248145       0.059000   -9999.000000       0.080400       0.394000
53644     53644     neimenggu      108.8344       38.5947           86       155     2012      06        05        157              0.000000      23.293732       0.701393       0.230949       0.072000       0.170400       0.102400       0.330000
53644     53644     neimenggu      108.8344       38.5947           86       155     2012      06        06        158              0.000000      21.902496       0.571820       0.225735       0.067000   -9999.000000       0.099900   -9999.000000
53644     53644     neimenggu      108.8344       38.5947           86       155     2012      06        07        159              0.000000      20.983612       4.320557       0.224065       0.069500       0.133600       0.119900       0.580000
53644     53644     neimenggu      108.8344       38.5947           86       155     2012      06        08        160              0.000000      20.196381       0.000000       0.245544       0.062000   -9999.000000   -9999.000000       0.317000
53644     53644     neimenggu      108.8344       38.5947           86       155     2012      06        09        161              0.000000      21.804382       0.000000       0.227715       0.055000   -9999.000000       0.091500       0.283000
53644     53644     neimenggu      108.8344       38.5947           86       155     2012      06        10        162              0.000000      23.043854       0.000000       0.212500       0.060000       0.039500       0.065700       0.202000
53644     53644     neimenggu      108.8344       38.5947           86       155     2012      06        11        163              0.000000      20.373627       0.000000       0.201845       0.063000   -9999.000000       0.108200       0.272000
53644     53644     neimenggu      108.8344       38.5947           86       155     2012      06        12        164              0.000000      21.873322       0.000000       0.192797       0.056000       0.020700       0.096900       0.300000
53644     53644     neimenggu      108.8344       38.5947           86       155     2012      06        13        165              0.000000      23.684174       0.000000       0.183300       0.052000   -9999.000000       0.092500       0.440000
53644     53644     neimenggu      108.8344       38.5947           86       155     2012      06        14        166              0.000000      21.931946       0.000000       0.177323       0.059000       0.196700   -9999.000000       0.232000
53644     53644     neimenggu      108.8344       38.5947           86       155     2012      06        15        167              0.000000      21.793945       0.000000       0.173309       0.055000       0.101200       0.093000   -9999.000000
53644     53644     neimenggu      108.8344       38.5947           86       155     2012      06        16        168              0.000000      22.757965       0.000000       0.167515       0.060000       0.061400       0.072000       0.355000
53644     53644     neimenggu      108.8344       38.5947           86       155     2012      06        17        169              0.000000      24.480774       0.000000       0.160627       0.062500   -9999.000000       0.099200       0.364000
53644     53644     neimenggu      108.8344       38.5947           86       155     2012      06        18        170              0.000000      26.166138       0.263822       0.153285       0.056000   -9999.000000       0.103300       0.406000
53644     53644     neimenggu      108.8344       38.5947           86       155     2012      06        19        171              0.000000      26.233734       8.226079       0.149079       0.069000       0.193500       0.088000       0.410000
53644     53644     neimenggu      108.8344       38.5947           86       155     2012      06        20        172              0.000000      24.003479       8.074531       0.207408   -9999.000000   -9999.000000       0.135400   -9999.000000
53644     53644     neimenggu      108.8344       38.5947           86       155     2012      06        21        173              0.000000      24.555420       0.238289       0.235234       0.067000   -9999.000000       0.074400       0.624000
53644     53644     neimenggu      108.8344       38.5947           86       155     2012      06        22        174              0.000000      24.780731       7.879159       0.229704       0.072000       0.085300       0.103400       0.494000
53644     53644     neimenggu      108.8344       38.5947           86       155     2012      06        23        175              0.000000      24.630646       7.462416       0.248661       0.077000       0.207600       0.092500       0.477000
53644     53644     neimenggu      108.8344       38.5947           86       155     2012      06        24        176              0.000000      23.745148       0.865594       0.256276       0.075000   -9999.000000       0.095100       0.426000
53644     53644     neimenggu      108.8344       38.5947           86       155     2012      06        25        177              0.000000      24.661896       1.274585       0.238641       0.076500       0.346900   -9999.000000   -9999.000000
53644     53644     neimenggu      108.8344       38.5947           86       155     2012      06        26        178              0.000000      25.206604       0.179445       0.229911       0.056000   -9999.000000       0.089400       0.478000
53644     53644     neimenggu      108.8344       38.5947           86       155     2012      06        27        179              0.000000      24.398529      42.109180       0.219340       0.131000   -9999.000000       0.163700       0.938000
53644     53644     neimenggu      108.8344       38.5947           86       155     2012      06        28        180              0.000000      20.307465       6.436193       0.308553       0.118500       0.207600       0.161900       0.706000
53644     53644     neimenggu      108.8344       38.5947           86       155     2012      06        29        181              0.000000      22.318085       0.000000       0.293622       0.073000       0.095700       0.127200   -9999.000000
53644     53644     neimenggu      108.8344       38.5947           86       155     2012      06        30        182              0.000000      23.291504       0.000000       0.270210       0.064000       0.144300       0.118600   -9999.000000
53644     53644     neimenggu      108.8344       38.5947           86       155     2012      07        01        183              0.000000      25.001678       0.000000       0.252545       0.066000   -9999.000000   -9999.000000       0.498000
53644     53644     neimenggu      108.8344       38.5947           86       155     2012      07        02        184              0.000000      25.938995       0.000000       0.241204       0.069000       0.204000       0.092600       0.564000
53644     53644     neimenggu      108.8344       38.5947           86       155     2012      07        03        185              0.000000      27.037506       0.368682       0.229693       0.074000       0.090600       0.140400       0.417000
53644     53644     neimenggu      108.8344       38.5947           86       155     2012      07        04        186              0.000000      24.892487       0.461393       0.227303       0.063000   -9999.000000       0.106900       0.497000
53644     53644     neimenggu      108.8344       38.5947           86       155     2012      07        05        187              0.000000      25.577667       0.000000       0.222643       0.057000   -9999.000000       0.105600   -9999.000000
53644     53644     neimenggu      108.8344       38.5947           86       155     2012      07        06        188              0.000000      26.870819       2.137381       0.212731       0.064000   -9999.000000       0.103100       0.292000
53644     53644     neimenggu      108.8344       38.5947           86       155     2012      07        07        189              0.000000      26.462189       0.852534       0.210812   -9999.000000   -9999.000000       0.117100       0.462000
53644     53644     neimenggu      108.8344       38.5947           86       155     2012      07        08        190              0.000000      23.937988       1.656727       0.228554       0.059500       0.157700       0.073100       0.401000
53644     53644     neimenggu      108.8344       38.5947           86       155     2012      07        09        191              0.000000      24.578613       0.000000       0.229892       0.059500   -9999.000000       0.097700       0.233000
53644     53644     neimenggu      108.8344       38.5947           86       155     2012      07        10        192              0.000000      25.468567       0.036337       0.217746       0.073000   -9999.000000       0.104000       0.386000
53644     53644     neimenggu      108.8344       38.5947           86       155     2012      07        11        193              0.000000      26.376099       0.000000       0.203604       0.060500       0.232300       0.112000       0.311000
53644     53644     neimenggu      108.8344       38.5947           86       155     2012      07        12        194              0.000000      26.828705       0.000000       0.191826       0.056000   -9999.000000   -9999.000000       0.521000
53644     53644     neimenggu      108.8344       38.5947           86       155     2012      07        13        195              0.000000      27.251617       0.000000       0.182482       0.063000   -9999.000000       0.093300       0.327000
53644     53644     neimenggu      108.8344       38.5947           86       155     2012      07        14        196              0.000000      26.718414       0.730728       0.176912       0.063000   -9999.000000       0.096400   -9999.000000
53644     53644     neimenggu      108.8344       38.5947           86       155     2012      07        15        197              0.000000      25.859192       0.000000       0.179587       0.039000   -9999.000000       0.101400       0.389000
53644     53644     neimenggu      108.8344       38.5947           86       155     2012      07        16        198              0.000000      26.192413       0.000000       0.178072       0.058000   -9999.000000       0.092100       0.388000
53644     53644     neimenggu      108.8344       38.5947           86       155     2012      07        17        199              0.000000      26.851349       0.107445       0.172159       0.052000   -9999.000000       0.111000       0.432000
53644     53644     neimenggu      108.8344       38.5947           86       155     2012      07        18        200              0.000000      26.673676      19.909216       0.168689       0.073000       0.034400   -9999.000000       0.698000
53644     53644     neimenggu      108.8344       38.5947           86       155     2012      07        19        201              0.000000      24.611816       0.000000       0.281855       0.066000   -9999.000000       0.073100   -9999.000000
53644     53644     neimenggu      108.8344       38.5947           86       155     2012      07        20        202              0.086000      25.976257      31.632235       0.245489       0.050000       0.178900       0.172600       0.527000
53644     53644     neimenggu      108.8344       38.5947           86       155     2012      07        21        203              0.129958      25.238312       1.642575       0.265426       0.138000       0.280600       0.159400       0.649000
53644     53644     neimenggu      108.8344       38.5947           86       155     2012      07        22        204              0.103792      21.694977       0.000000       0.291298       0.083000       0.140400       0.122000       0.636000
53644     53644     neimenggu      108.8344       38.5947           86       155     2012      07        23        205              0.095500      23.743561       0.000000       0.260961       0.076000   -9999.000000       0.114400       0.362000
53644     53644     neimenggu      108.8344       38.5947           86       155     2012      07        24        206              0.149458      24.498657      65.902557       0.248186       0.065000   -9999.000000       0.186100   -9999.000000
53644     53644     neimenggu      108.8344       38.5947           86       155     2012      07        25        207              0.137667      24.678131       0.822203       0.289168       0.102000       0.209600       0.129600       0.793000
53644     53644     neimenggu      108.8344       38.5947           86       155     2012      07        26        208              0.112333      26.068817       3.126968       0.300343       0.079000       0.188800       0.123500       0.656000
53644     53644     neimenggu      108.8344       38.5947           86       155     2012      07        27        209              0.165417      27.116882      76.705803       0.283312       0.077000       0.280300       0.082300       0.521000
53644     53644     neimenggu      108.8344       38.5947           86       155     2012      07        28        210              0.126333      23.380249       0.000000       0.351129       0.091000   -9999.000000       0.146700       0.645000
53644     53644     neimenggu      108.8344       38.5947           86       155     2012      07        29        211              0.117208      26.707611      20.251099       0.293351       0.077000   -9999.000000   -9999.000000   -9999.000000
53644     53644     neimenggu      108.8344       38.5947           86       155     2012      07        30        212              0.146375      26.723694       6.168182       0.286638       0.138000   -9999.000000       0.174700       0.886000
53644     53644     neimenggu      108.8344       38.5947           86       155     2012      07        31        213              0.115500      20.506714       0.000000       0.305514       0.088000       0.240800       0.131300       0.613000
53644     53644     neimenggu      108.8344       38.5947           86       155     2012      08        01        214              0.104833      25.165710       0.000000       0.276796       0.080000   -9999.000000       0.136700       0.691000
53644     53644     neimenggu      108.8344       38.5947           86       155     2012      08        02        215              0.098292      26.331238       0.000000       0.264177       0.068000   -9999.000000       0.089100       0.417000
53644     53644     neimenggu      108.8344       38.5947           86       155     2012      08        03        216              0.092292      26.561401       0.000000       0.253260       0.079000       0.131600       0.124400   -9999.000000
53644     53644     neimenggu      108.8344       38.5947           86       155     2012      08        04        217              0.086167      26.617859       0.000000       0.246190       0.072500       0.069400       0.108700       0.452000
53644     53644     neimenggu      108.8344       38.5947           86       155     2012      08        05        218              0.080625      26.409088       0.000000       0.239430       0.069000       0.072400       0.091700       0.559000
53644     53644     neimenggu      108.8344       38.5947           86       155     2012      08        06        219              0.076000      26.402161       0.591032       0.234312       0.075000   -9999.000000       0.095500       0.487000
53644     53644     neimenggu      108.8344       38.5947           86       155     2012      08        07        220              0.072000      26.908691       0.000000       0.231995       0.082500       0.145200       0.113000       0.377000
53644     53644     neimenggu      108.8344       38.5947           86       155     2012      08        08        221              0.068000      26.646973       0.000000       0.224338       0.054000       0.231600       0.121000       0.429000
53644     53644     neimenggu      108.8344       38.5947           86       155     2012      08        09        222              0.065000      24.597137       0.000000       0.218201       0.076000   -9999.000000   -9999.000000       0.488000
53644     53644     neimenggu      108.8344       38.5947           86       155     2012      08        10        223              0.062208      25.954346       0.000000       0.210756       0.075000       0.148500       0.081100       0.492000
53644     53644     neimenggu      108.8344       38.5947           86       155     2012      08        11        224              0.058375      26.132202       0.133746       0.206085       0.074000   -9999.000000       0.079200       0.443000
53644     53644     neimenggu      108.8344       38.5947           86       155     2012      08        12        225              0.057167      22.936584       0.000000       0.209467       0.077000   -9999.000000       0.080700   -9999.000000
53644     53644     neimenggu      108.8344       38.5947           86       155     2012      08        13        226              0.056087      24.480560       6.638967       0.204184       0.142000       0.258600       0.120200       0.405000
53644     53644     neimenggu      108.8344       38.5947           86       155     2012      08        14        227              0.062833      23.767273       0.031438       0.224217       0.082000   -9999.000000       0.136200       0.430000
53644     53644     neimenggu      108.8344       38.5947           86       155     2012      08        15        228              0.063458      23.381805       0.000000       0.234523       0.071000       0.063700   -9999.000000       0.542000
53644     53644     neimenggu      108.8344       38.5947           86       155     2012      08        16        229              0.082292      24.247406      26.004564       0.220140       0.087500   -9999.000000       0.135900       0.890000
53644     53644     neimenggu      108.8344       38.5947           86       155     2012      08        17        230              0.131042      25.606201      12.035668       0.299559       0.109000   -9999.000000       0.185000   -9999.000000
53644     53644     neimenggu      108.8344       38.5947           86       155     2012      08        18        231              0.106750      22.478485       0.000000       0.302463       0.066500       0.312100       0.135500       0.738000
53644     53644     neimenggu      108.8344       38.5947           86       155     2012      08        19        232              0.097000      22.416779       0.000000       0.268616       0.092000   -9999.000000       0.106900       0.556000
53644     53644     neimenggu      108.8344       38.5947           86       155     2012      08        20        233              0.089792      23.886475       0.000000       0.254240       0.067500   -9999.000000       0.115700       0.572000
53644     53644     neimenggu      108.8344       38.5947           86       155     2012      08        21        234              0.083542      21.066711       0.000000       0.243469       0.073500       0.097100       0.115200   -9999.000000
53644     53644     neimenggu      108.8344       38.5947           86       155     2012      08        22        235              0.078458      19.594604       0.000000       0.235755       0.076000   -9999.000000       0.103300   -9999.000000
53644     53644     neimenggu      108.8344       38.5947           86       155     2012      08        23        236              0.073750      20.940338       0.000000       0.230078       0.069000       0.075600       0.090900       0.500000
53644     53644     neimenggu      108.8344       38.5947           86       155     2012      08        24        237              0.070875      22.155212       0.000000       0.226529   -9999.000000   -9999.000000       0.126600   -9999.000000
53644     53644     neimenggu      108.8344       38.5947           86       155     2012      08        25        238              0.000000      23.002197      14.523437       0.221530       0.111000       0.266100       0.124000   -9999.000000
53644     53644     neimenggu      108.8344       38.5947           86       155     2012      08        26        239              0.116000      23.132111       0.000000       0.261040       0.082000       0.108800   -9999.000000       0.443000
53644     53644     neimenggu      108.8344       38.5947           86       155     2012      08        27        240              0.101833      23.258514       0.660643       0.258110   -9999.000000   -9999.000000       0.069700   -9999.000000
53644     53644     neimenggu      108.8344       38.5947           86       155     2012      08        28        241              0.094750      22.856934       0.000000       0.246713       0.086000       0.050900       0.088200       0.677000
53644     53644     neimenggu      108.8344       38.5947           86       155     2012      08        29        242              0.089542      23.829315       0.000000       0.236061       0.072000   -9999.000000       0.075700       0.558000
53644     53644     neimenggu      108.8344       38.5947           86       155     2012      08        30        243              0.083625      23.867981       3.021163       0.226834       0.088000       0.254400       0.092800       0.469000
53644     53644     neimenggu      108.8344       38.5947           86       155     2012      08        31        244              0.097333      23.566132      15.073049       0.230324       0.099000       0.240300       0.103300       0.454000
53644     53644     neimenggu      108.8344       38.5947           86       155     2012      09        01        245              0.144500      20.784637      17.260199       0.267964       0.117500       0.156500   -9999.000000   -9999.000000
53644     53644     neimenggu      108.8344       38.5947           86       155     2012      09        02        246              0.111625      14.261536       0.366458       0.307467       0.097000   -9999.000000       0.095900       0.584000
53644     53644     neimenggu      108.8344       38.5947           86       155     2012      09        03        247              0.101792      18.497589       0.000000       0.274275       0.091000       0.233400       0.071700       0.497000
53644     53644     neimenggu      108.8344       38.5947           86       155     2012      09        04        248              0.095708      17.297638       0.913289       0.261940       0.112000   -9999.000000       0.104200       0.413000
53644     53644     neimenggu      108.8344       38.5947           86       155     2012      09        05        249              0.092583      18.460632       0.101641       0.256511       0.091000       0.227100       0.103900       0.423000
53644     53644     neimenggu      108.8344       38.5947           86       155     2012      09        06        250              0.089500      19.589081       0.058064       0.251929       0.082500   -9999.000000       0.109900       0.509000
53644     53644     neimenggu      108.8344       38.5947           86       155     2012      09        07        251              0.085500      20.338562       0.190673       0.245298       0.072000   -9999.000000       0.082800       0.453000
53644     53644     neimenggu      108.8344       38.5947           86       155     2012      09        08        252              0.082875      19.286591       3.118235       0.241098       0.075000       0.030600       0.070900       0.500000
53644     53644     neimenggu      108.8344       38.5947           86       155     2012      09        09        253              0.080333      21.465424       0.186000       0.236308       0.086000       0.074400       0.080800       0.443000
53644     53644     neimenggu      108.8344       38.5947           86       155     2012      09        10        254              0.078750      21.291992      17.375727       0.231646       0.119000       0.219600       0.126700   -9999.000000
53644     53644     neimenggu      108.8344       38.5947           86       155     2012      09        11        255              0.079458      17.307343       6.033708       0.289666       0.079000   -9999.000000       0.131600       0.754000
53644     53644     neimenggu      108.8344       38.5947           86       155     2012      09        12        256              0.077042      15.926636       0.000000       0.284250       0.082000       0.220700   -9999.000000       0.356000
53644     53644     neimenggu      108.8344       38.5947           86       155     2012      09        13        257              0.075500      12.954590       0.000000       0.264632       0.089000       0.182500       0.080600       0.550000
53644     53644     neimenggu      108.8344       38.5947           86       155     2012      09        14        258              0.074417      14.303314       0.000000       0.255739       0.068500   -9999.000000       0.092700       0.372000
53644     53644     neimenggu      108.8344       38.5947           86       155     2012      09        15        259              0.072708      16.351532       0.354189       0.248663       0.095000       0.131600       0.065300   -9999.000000
53644     53644     neimenggu      108.8344       38.5947           86       155     2012      09        16        260              0.070583      16.449921       0.295993       0.245528       0.080500   -9999.000000       0.090300       0.472000
53644     53644     neimenggu      108.8344       38.5947           86       155     2012      09        17        261              0.107792      15.500275       7.204711       0.246523       0.091000   -9999.000000       0.143400       0.691000
53644     53644     neimenggu      108.8344       38.5947           86       155     2012      09        18        262              0.118250      15.850311       0.020448       0.269143       0.078000       0.423800   -9999.000000       0.686000
53644     53644     neimenggu      108.8344       38.5947           86       155     2012      09        19        263              0.103375      17.425995       0.000000       0.256652       0.074000   -9999.000000       0.066400       0.415000
53644     53644     neimenggu      108.8344       38.5947           86       155     2012      09        20        264              0.096083      18.258331       3.807466       0.246859       0.125000       0.127400       0.111400   -9999.000000
53644     53644     neimenggu      108.8344       38.5947           86       155     2012      09        21        265              0.096500      17.223022       0.039260       0.255330   -9999.000000       0.242000       0.085500       0.729000
53644     53644     neimenggu      108.8344       38.5947           86       155     2012      09        22        266              0.092917      17.115234       0.000000       0.253286       0.075500       0.230400       0.101600       0.531000
53644     53644     neimenggu      108.8344       38.5947           86       155     2012      09        23        267              0.088333      18.000946       0.000000       0.244054       0.061000       0.215300       0.088500       0.536000
53644     53644     neimenggu      108.8344       38.5947           86       155     2012      09        24        268              0.134667      18.612549      38.829521       0.238139       0.144000       0.124500       0.129900       0.938000
53644     53644     neimenggu      108.8344       38.5947           86       155     2012      09        25        269              0.127167      14.729889       0.171853       0.313209   -9999.000000   -9999.000000       0.090400   -9999.000000
53644     53644     neimenggu      108.8344       38.5947           86       155     2012      09        26        270              0.108500      14.350067       0.000000       0.291733       0.099000       0.279700       0.094400       0.759000
53644     53644     neimenggu      108.8344       38.5947           86       155     2012      09        27        271              0.100643      15.482330       0.000000       0.273096       0.079000       0.436800       0.105000       0.490000
53644     53644     neimenggu      108.8344       38.5947           86       155     2012      09        28        272              0.093267      11.855988       0.000000       0.263046       0.083000   -9999.000000       0.098100       0.498000
53644     53644     neimenggu      108.8344       38.5947           86       155     2012      09        29        273              0.090875      11.512482       0.000000       0.257363       0.079000   -9999.000000   -9999.000000       0.385000
53644     53644     neimenggu      108.8344       38.5947           86       155     2012      09        30        274              0.088208      12.385193       0.641612       0.252381       0.077000   -9999.000000       0.085000   -9999.000000
53644     53644     neimenggu      108.8344       38.5947           86       155     2012      10        01        275              0.086333      13.654053       0.000000       0.248014       0.079000   -9999.000000       0.074500       0.418000
53644     53644     neimenggu      108.8344       38.5947           86       155     2012      10        02        276              0.083583      15.641998       0.000000       0.244687       0.067000   -9999.000000       0.078500       0.443000
53644     53644     neimenggu      108.8344       38.5947           86       155     2012      10        03        277              0.081458      15.119324       4.459355       0.240267       0.078000       0.083000       0.067300       0.356000
53644     53644     neimenggu      108.8344       38.5947           86       155     2012      10        04        278              0.086292      14.738190       3.864118       0.245100       0.094000   -9999.000000       0.129600       0.519000
53644     53644     neimenggu      108.8344       38.5947           86       155     2012      10        05        279              0.107167      12.557709       0.057911       0.267156       0.075000   -9999.000000       0.091000       0.764000
53644     53644     neimenggu      108.8344       38.5947           86       155     2012      10        06        280              0.101500      12.634003       0.000000       0.258174       0.076000       0.199700       0.063900       0.558000
53644     53644     neimenggu      108.8344       38.5947           86       155     2012      10        07        281              0.095208      14.055695       0.000000       0.250563       0.087000   -9999.000000       0.084600       0.496000
53644     53644     neimenggu      108.8344       38.5947           86       155     2012      10        08        282              0.094750      12.277863       1.866042       0.249057       0.090000       0.200700       0.110500       0.694000
53644     53644     neimenggu      108.8344       38.5947           86       155     2012      10        09        283              0.096417      12.122314       0.025150       0.253936       0.078000   -9999.000000       0.100200   -9999.000000
53644     53644     neimenggu      108.8344       38.5947           86       155     2012      10        10        284              0.093417      10.670441       0.074243       0.247868       0.090000   -9999.000000   -9999.000000       0.466000
53644     53644     neimenggu      108.8344       38.5947           86       155     2012      10        11        285              0.090542      11.912811       0.000000       0.243729       0.088000       0.085800       0.055500       0.417000
53644     53644     neimenggu      108.8344       38.5947           86       155     2012      10        12        286              0.087417      12.394806       5.821052       0.239101   -9999.000000   -9999.000000       0.056600       0.553000
53644     53644     neimenggu      108.8344       38.5947           86       155     2012      10        13        287              0.084167      12.249481       0.827603       0.235736       0.068500   -9999.000000       0.060800       0.416000
53644     53644     neimenggu      108.8344       38.5947           86       155     2012      10        14        288              0.082167      11.626587       0.133736       0.237700       0.069500   -9999.000000       0.113100   -9999.000000
53644     53644     neimenggu      108.8344       38.5947           86       155     2012      10        15        289              0.109917      11.983154       2.435099       0.237805       0.083000   -9999.000000       0.093300       0.687000
53644     53644     neimenggu      108.8344       38.5947           86       155     2012      10        16        290              0.117000      10.327209       1.903353       0.246528       0.081000   -9999.000000   -9999.000000       0.502000
53644     53644     neimenggu      108.8344       38.5947           86       155     2012      10        17        291              0.103333       6.479889       4.641542       0.241919   -9999.000000   -9999.000000       0.069300       0.654000
53644     53644     neimenggu      108.8344       38.5947           86       155     2012      10        18        292              0.096792       7.605072       0.000000       0.247736   -9999.000000       0.089600       0.095700       0.446000
53644     53644     neimenggu      108.8344       38.5947           86       155     2012      10        19        293              0.093792       7.644226       0.000000       0.242789       0.081000       0.106600       0.094200   -9999.000000
53644     53644     neimenggu      108.8344       38.5947           86       155     2012      10        20        294              0.092208      10.517487       0.093557       0.239740       0.067000       0.245300       0.092600       0.575000
53644     53644     neimenggu      108.8344       38.5947           86       155     2012      10        21        295              0.088000      12.730347       2.258281       0.237661       0.083000       0.115800       0.113800       0.401000
53644     53644     neimenggu      108.8344       38.5947           86       155     2012      10        22        296              0.086208       5.964020       0.657638       0.249062   -9999.000000   -9999.000000       0.098300       0.531000
53644     53644     neimenggu      108.8344       38.5947           86       155     2012      10        23        297              0.084667       6.799927       0.000000       0.241647   -9999.000000       0.084100       0.059200       0.385000
53644     53644     neimenggu      108.8344       38.5947           86       155     2012      10        24        298              0.083208       7.875397       0.000000       0.239351   -9999.000000       0.118300       0.087200   -9999.000000
53644     53644     neimenggu      108.8344       38.5947           86       155     2012      10        25        299              0.000000       8.350372       0.197284       0.236231       0.084500   -9999.000000       0.089600       0.504000
53644     53644     neimenggu      108.8344       38.5947           86       155     2012      10        26        300              0.080875       9.309723       0.503708       0.235428       0.097000   -9999.000000       0.116700       0.570000
53644     53644     neimenggu      108.8344       38.5947           86       155     2012      10        27        301              0.080500       7.420532       0.065112       0.240792       0.092000   -9999.000000   -9999.000000       0.628000
53644     53644     neimenggu      108.8344       38.5947           86       155     2012      10        28        302              0.000000       8.923279       0.000000       0.237203   -9999.000000   -9999.000000       0.069100       0.397000
53644     53644     neimenggu      108.8344       38.5947           86       155     2012      10        29        303              0.078292       9.928772       1.017793       0.235400   -9999.000000       0.157100       0.055500   -9999.000000
53644     53644     neimenggu      108.8344       38.5947           86       155     2012      10        30        304              0.076917       5.370117       0.000000       0.220814       0.080000   -9999.000000       0.057600       0.336000
53644     53644     neimenggu      108.8344       38.5947           86       155     2012      10        31        305              0.076542       4.497620       0.000000       0.223667       0.072000   -9999.000000       0.097700       0.312000
53644     53644     neimenggu      108.8344       38.5947           86       155     2012      11        01        306              0.076125       5.535950       0.000000       0.224622       0.079000       0.155700       0.103200       0.336000
53644     53644     neimenggu      108.8344       38.5947           86       155     2012      11        02        307              0.075833       6.325165       0.131128       0.230095   -9999.000000   -9999.000000   -9999.000000       0.738000
53644     53644     neimenggu      108.8344       38.5947           86       155     2012      11        03        308              0.072208       7.067078       0.000000       0.222927   -9999.000000       0.068500       0.053500       0.553000
53644     53644     neimenggu      108.8344       38.5947           86       155     2012      11        04        309              0.068542      -0.863495       0.050628       0.155620   -9999.000000   -9999.000000       0.066500       0.253000
53644     53644     neimenggu      108.8344       38.5947           86       155     2012      11        05        310              0.068333      -1.690613       0.000000       0.125981       0.087000   -9999.000000       0.082500   -9999.000000
53644     53644     neimenggu      108.8344       38.5947           86       155     2012      11        06        311              0.071542       0.096649       0.000000       0.147390       0.085000   -9999.000000       0.100400       0.220000
53644     53644     neimenggu      108.8344       38.5947           86       155     2012      11        07        312              0.072583       2.047638       0.052282       0.185172       0.079000       0.167500       0.090400   -9999.000000
53644     53644     neimenggu      108.8344       38.5947           86       155     2012      11        08        313              0.072792       2.311554       0.000000       0.192825   -9999.000000       0.060100       0.090400       0.427000
53644     53644     neimenggu      108.8344       38.5947           86       155     2012      11        09        314              0.073458       3.840607       0.415086       0.217172   -9999.000000   -9999.000000       0.061800       0.444000
53644     53644     neimenggu      108.8344       38.5947           86       155     2012      11        10        315              0.070292       3.428650       0.071276       0.214449   -9999.000000       0.203600       0.069400       0.437000
53644     53644     neimenggu      108.8344       38.5947           86       155     2012      11        11        316              0.066250      -1.107330       0.036087       0.145153       0.066000   -9999.000000       0.077500       0.102000
53644     53644     neimenggu      108.8344       38.5947           86       155     2012      11        12        317              0.068125      -0.549561       0.000000       0.137663       0.072000   -9999.000000       0.102700   -9999.000000
53644     53644     neimenggu      108.8344       38.5947           86       155     2012      11        13        318              0.000000      -0.020935       0.000000       0.151761   -9999.000000   -9999.000000   -9999.000000       0.325000
53644     53644     neimenggu      108.8344       38.5947           86       155     2012      11        14        319              0.069042       0.344940       0.000000       0.153273   -9999.000000   -9999.000000       0.054300       0.218000
53644     53644     neimenggu      108.8344       38.5947           86       155     2012      11        15        320              0.071000       1.718506       0.432995       0.179570   -9999.000000   -9999.000000       0.063100       0.285000
53644     53644     neimenggu      108.8344       38.5947           86       155     2012      11        16        321              0.072792      -0.794525       0.000000       0.144564       0.091000       0.086300       0.081500       0.168000
53644     53644     neimenggu      108.8344       38.5947           86       155     2012      11        17        322              0.000000      -0.245148       0.000000       0.145944       0.079000       0.071900       0.085200   -9999.000000
53644     53644     neimenggu      108.8344       38.5947           86       155     2012      11        18        323              0.078083       1.339050       0.000000       0.174686   -9999.000000   -9999.000000       0.105600       0.453000
53644     53644     neimenggu      108.8344       38.5947           86       155     2012      11        19        324              0.076458       1.571930       0.000000       0.177031   -9999.000000       0.103900   -9999.000000       0.302000
53644     53644     neimenggu      108.8344       38.5947           86       155     2012      11        20        325              0.080042       1.720490       0.000000       0.187080       0.096000   -9999.000000       0.062600       0.488000
53644     53644     neimenggu      108.8344       38.5947           86       155     2012      11        21        326              0.080625       2.027374       0.000000       0.199131       0.094000       0.053200       0.083400       0.350000
53644     53644     neimenggu      108.8344       38.5947           86       155     2012      11        22        327              0.078083       2.886108       0.000000       0.203383   -9999.000000   -9999.000000       0.086700   -9999.000000
53644     53644     neimenggu      108.8344       38.5947           86       155     2012      11        23        328              0.062208      -0.656281       0.000000       0.150922       0.084000   -9999.000000       0.091900       0.296000
53644     53644     neimenggu      108.8344       38.5947           86       155     2012      11        24        329              0.055250      -1.268097       0.057899       0.132003   -9999.000000   -9999.000000       0.071000       0.254000
53644     53644     neimenggu      108.8344       38.5947           86       155     2012      11        25        330              0.055750       0.247589       0.000000       0.149766   -9999.000000       0.109600       0.067900       0.182000
53644     53644     neimenggu      108.8344       38.5947           86       155     2012      11        26        331              0.050500      -2.319550       3.129421       0.114151       0.078000   -9999.000000   -9999.000000       0.039000
53644     53644     neimenggu      108.8344       38.5947           86       155     2012      11        27        332              0.050125      -1.032318       3.587453       0.133095   -9999.000000   -9999.000000       0.079300   -9999.000000
53644     53644     neimenggu      108.8344       38.5947           86       155     2012      11        28        333              0.046708      -0.061951       0.000000       0.147648   -9999.000000   -9999.000000       0.081400       0.100000
53644     53644     neimenggu      108.8344       38.5947           86       155     2012      11        29        334              0.046792      -3.686066       0.000000       0.102455   -9999.000000   -9999.000000       0.089000       0.021000
53644     53644     neimenggu      108.8344       38.5947           86       155     2012      11        30        335              0.048167      -2.390076       0.000000       0.122322   -9999.000000   -9999.000000   -9999.000000       0.034000
53644     53644     neimenggu      108.8344       38.5947           86       155     2012      12        01        336              0.049167      -1.257172       0.000000       0.122373       0.071000   -9999.000000       0.055200       0.013000
53644     53644     neimenggu      108.8344       38.5947           86       155     2012      12        02        337              0.047000      -1.333038       0.000000       0.133656   -9999.000000   -9999.000000       0.065300       0.089000
53644     53644     neimenggu      108.8344       38.5947           86       155     2012      12        03        338              0.046167      -3.286835       0.000000       0.110478   -9999.000000   -9999.000000       0.060300       0.032000
53644     53644     neimenggu      108.8344       38.5947           86       155     2012      12        04        339              0.046417      -3.367950       0.000000       0.105640   -9999.000000   -9999.000000       0.079100       0.352000
53644     53644     neimenggu      108.8344       38.5947           86       155     2012      12        05        340              0.045292      -3.577332       0.000000       0.106365   -9999.000000   -9999.000000       0.083000       0.023000
53644     53644     neimenggu      108.8344       38.5947           86       155     2012      12        06        341              0.046042      -4.529053       0.000000       0.093801   -9999.000000   -9999.000000       0.062300   -9999.000000
53644     53644     neimenggu      108.8344       38.5947           86       155     2012      12        07        342              0.044917      -4.421814       0.000000       0.099896   -9999.000000   -9999.000000       0.052200       0.169000
53644     53644     neimenggu      108.8344       38.5947           86       155     2012      12        08        343              0.044458      -6.518036       0.000000       0.089349   -9999.000000   -9999.000000       0.056800       0.087000
53644     53644     neimenggu      108.8344       38.5947           86       155     2012      12        09        344              0.044542      -6.235046       0.000000       0.086019   -9999.000000   -9999.000000       0.085900       0.169000
53644     53644     neimenggu      108.8344       38.5947           86       155     2012      12        10        345              0.044708      -4.291901       0.000000       0.096931   -9999.000000   -9999.000000       0.081700       0.001000
53644     53644     neimenggu      108.8344       38.5947           86       155     2012      12        11        346              0.044750      -3.788116       0.000000       0.105204   -9999.000000   -9999.000000   -9999.000000   -9999.000000
53644     53644     neimenggu      108.8344       38.5947           86       155     2012      12        12        347              0.045000      -2.989044       0.000000       0.110907       0.076000   -9999.000000       0.053800       0.028000
53644     53644     neimenggu      108.8344       38.5947           86       155     2012      12        13        348              0.045583      -2.053894       0.101541       0.117290   -9999.000000       0.173500       0.057800       0.106000
53644     53644     neimenggu      108.8344       38.5947           86       155     2012      12        14        349              0.046792      -2.635162       0.000000       0.102539       0.086000   -9999.000000       0.055300       0.154000
53644     53644     neimenggu      108.8344       38.5947           86       155     2012      12        15        350              0.000000      -1.337433       0.000000       0.126598   -9999.000000   -9999.000000       0.063000       0.089000
53644     53644     neimenggu      108.8344       38.5947           86       155     2012      12        16        351              0.046917      -2.596741       0.000000       0.101395   -9999.000000       0.176800       0.091600   -9999.000000
53644     53644     neimenggu      108.8344       38.5947           86       155     2012      12        17        352              0.044792      -4.277924       0.210538       0.094174   -9999.000000   -9999.000000   -9999.000000       0.030000
53644     53644     neimenggu      108.8344       38.5947           86       155     2012      12        18        353              0.044542      -6.235657       0.000000       0.088104   -9999.000000   -9999.000000       0.058700       0.024000
53644     53644     neimenggu      108.8344       38.5947           86       155     2012      12        19        354              0.044792      -5.769562       0.000000       0.085395   -9999.000000   -9999.000000       0.046700       0.084000
53644     53644     neimenggu      108.8344       38.5947           86       155     2012      12        20        355              0.000000      -5.085052       0.195044       0.085571   -9999.000000   -9999.000000       0.055100   -9999.000000
53644     53644     neimenggu      108.8344       38.5947           86       155     2012      12        21        356              0.045000      -6.682861       0.000000       0.081833   -9999.000000   -9999.000000       0.046000   -9999.000000
53644     53644     neimenggu      108.8344       38.5947           86       155     2012      12        22        357              0.044542      -8.741791       0.000000       0.078884   -9999.000000   -9999.000000       0.077700       0.098000
53644     53644     neimenggu      108.8344       38.5947           86       155     2012      12        23        358              0.043833     -12.952301       0.000000       0.076040   -9999.000000   -9999.000000       0.073600   -9999.000000
53644     53644     neimenggu      108.8344       38.5947           86       155     2012      12        24        359              0.044000     -12.992706       0.000000       0.073207   -9999.000000   -9999.000000       0.042000       0.005000
53644     53644     neimenggu      108.8344       38.5947           86       155     2012      12        25        360              0.043917     -11.187439       0.000000       0.073631   -9999.000000   -9999.000000       0.054400       0.069000
53644     53644     neimenggu      108.8344       38.5947           86       155     2012      12        26        361              0.000000      -9.262146       0.000000       0.073981   -9999.000000   -9999.000000       0.068900   -9999.000000
53644     53644     neimenggu      108.8344       38.5947           86       155     2012      12        27        362              0.044300      -6.664856       0.000000       0.080765   -9999.000000   -9999.000000       0.087100       0.077000
53644     53644     neimenggu      108.8344       38.5947           86       155     2012      12        28        363              0.000000      -5.288269       0.000000       0.090742   -9999.000000   -9999.000000   -9999.000000       0.014000
53644     53644     neimenggu      108.8344       38.5947           86       155     2012      12        29        364              0.000000      -9.395477       0.000000       0.078664   -9999.000000   -9999.000000       0.051200       0.027000
53644     53644     neimenggu      108.8344       38.5947           86       155     2012      12        30        365              0.000000     -11.535797       0.000000       0.075333   -9999.000000   -9999.000000       0.086600       0.003000
53644     53644     neimenggu      108.8344       38.5947           86       155     2012      12        31        366              0.043600      -9.182648       0.000000       0.074959   -9999.000000   -9999.000000       0.093200       0.066000
