# Supplementary material for: Research on Fusing Multisatellite Soil Moisture Data Based on Bayesian Model Averaging
Source: Hindawi journal article supplement (doi:10.1155/2018/9310838), 2018-06-25
Supplement: f1 [file 9310838.f1.zip › 2012_sm00-10cm_daily_ZDB_ZHY_53662_366days_allin.txt]

53662     53662     shanxi         111.5717       38.7083           85       166     2012      01        01        001              0.000000   -9999.000000       0.000000   -9999.000000   -9999.000000   -9999.000000       0.022600   -9999.000000
53662     53662     shanxi         111.5717       38.7083           85       166     2012      01        02        002              0.018625      -7.032135       0.000000       0.120633   -9999.000000   -9999.000000       0.025700       0.062000
53662     53662     shanxi         111.5717       38.7083           85       166     2012      01        03        003              0.000000     -11.017670       0.000000       0.112071   -9999.000000   -9999.000000       0.032800       0.012000
53662     53662     shanxi         111.5717       38.7083           85       166     2012      01        04        004              0.016833     -13.223785       0.000000       0.109587   -9999.000000   -9999.000000       0.018100       0.014000
53662     53662     shanxi         111.5717       38.7083           85       166     2012      01        05        005              0.016792     -12.308472       0.000000       0.109373   -9999.000000   -9999.000000       0.028600       0.060000
53662     53662     shanxi         111.5717       38.7083           85       166     2012      01        06        006              0.017083     -10.871033       0.000000       0.110050   -9999.000000   -9999.000000       0.021600       0.029000
53662     53662     shanxi         111.5717       38.7083           85       166     2012      01        07        007              0.018625      -8.756653       0.000000       0.112568   -9999.000000   -9999.000000       0.026100       0.054000
53662     53662     shanxi         111.5717       38.7083           85       166     2012      01        08        008              0.000000      -7.064392       0.000000       0.119339   -9999.000000   -9999.000000       0.024900   -9999.000000
53662     53662     shanxi         111.5717       38.7083           85       166     2012      01        09        009              0.017458      -8.569458       0.000000       0.116887   -9999.000000   -9999.000000   -9999.000000       0.005000
53662     53662     shanxi         111.5717       38.7083           85       166     2012      01        10        010              0.017125      -8.768555       0.000000       0.115720   -9999.000000   -9999.000000       0.035000       0.028000
53662     53662     shanxi         111.5717       38.7083           85       166     2012      01        11        011              0.016739      -9.822601       0.000000       0.112776   -9999.000000   -9999.000000       0.041200       0.055000
53662     53662     shanxi         111.5717       38.7083           85       166     2012      01        12        012              0.016833      -9.735291       0.000000       0.112417   -9999.000000   -9999.000000       0.023400       0.082000
53662     53662     shanxi         111.5717       38.7083           85       166     2012      01        13        013              0.017208      -8.670685       0.000000       0.118646   -9999.000000   -9999.000000       0.027700   -9999.000000
53662     53662     shanxi         111.5717       38.7083           85       166     2012      01        14        014              0.017750      -8.227325       0.000000       0.119858   -9999.000000   -9999.000000   -9999.000000       0.003000
53662     53662     shanxi         111.5717       38.7083           85       166     2012      01        15        015              0.018208      -7.451843       0.000000       0.120024   -9999.000000   -9999.000000       0.031300       0.036000
53662     53662     shanxi         111.5717       38.7083           85       166     2012      01        16        016              0.018542      -6.659302       0.000000       0.128534   -9999.000000   -9999.000000       0.031000       0.068000
53662     53662     shanxi         111.5717       38.7083           85       166     2012      01        17        017              0.000000      -6.873566       0.000000       0.124063   -9999.000000   -9999.000000       0.021400       0.090000
53662     53662     shanxi         111.5717       38.7083           85       166     2012      01        18        018              0.018375      -6.837738       0.000000       0.130227   -9999.000000   -9999.000000       0.023200   -9999.000000
53662     53662     shanxi         111.5717       38.7083           85       166     2012      01        19        019              0.020792      -5.590973       0.000000       0.134312   -9999.000000   -9999.000000       0.028300       0.065000
53662     53662     shanxi         111.5717       38.7083           85       166     2012      01        20        020              0.020000      -4.575012       0.000000       0.140727   -9999.000000   -9999.000000       0.028100   -9999.000000
53662     53662     shanxi         111.5717       38.7083           85       166     2012      01        21        021              0.018167      -9.292053       0.000000       0.117624   -9999.000000   -9999.000000       0.015900   -9999.000000
53662     53662     shanxi         111.5717       38.7083           85       166     2012      01        22        022              0.016875     -13.484161       0.000000       0.111356   -9999.000000   -9999.000000       0.021000       0.015000
53662     53662     shanxi         111.5717       38.7083           85       166     2012      01        23        023              0.016500     -14.454926       0.000000       0.108032   -9999.000000   -9999.000000       0.019200   -9999.000000
53662     53662     shanxi         111.5717       38.7083           85       166     2012      01        24        024              0.016375     -14.163147       0.000000       0.107564   -9999.000000   -9999.000000   -9999.000000       0.048000
53662     53662     shanxi         111.5717       38.7083           85       166     2012      01        25        025              0.016333     -12.545929       0.000000       0.108034   -9999.000000   -9999.000000       0.022200       0.037000
53662     53662     shanxi         111.5717       38.7083           85       166     2012      01        26        026              0.016542     -10.739105       0.000000       0.108810   -9999.000000   -9999.000000       0.025700       0.044000
53662     53662     shanxi         111.5717       38.7083           85       166     2012      01        27        027              0.016917      -8.946472       0.000000       0.115250   -9999.000000   -9999.000000       0.032300       0.061000
53662     53662     shanxi         111.5717       38.7083           85       166     2012      01        28        028              0.017250      -6.771454       0.000000       0.130816   -9999.000000   -9999.000000       0.024600   -9999.000000
53662     53662     shanxi         111.5717       38.7083           85       166     2012      01        29        029              0.017208      -7.567902       0.000000       0.128325   -9999.000000   -9999.000000       0.021200       0.049000
53662     53662     shanxi         111.5717       38.7083           85       166     2012      01        30        030              0.017333      -7.997681       0.000000       0.123490   -9999.000000   -9999.000000       0.025400       0.036000
53662     53662     shanxi         111.5717       38.7083           85       166     2012      01        31        031              0.018083      -5.879486       0.000000       0.132257   -9999.000000   -9999.000000   -9999.000000       0.012000
53662     53662     shanxi         111.5717       38.7083           85       166     2012      02        01        032              0.016917      -6.627991       0.000000       0.142283   -9999.000000   -9999.000000       0.025600       0.025000
53662     53662     shanxi         111.5717       38.7083           85       166     2012      02        02        033              0.016417     -11.893250       0.000000       0.110884   -9999.000000   -9999.000000       0.031200       0.012000
53662     53662     shanxi         111.5717       38.7083           85       166     2012      02        03        034              0.016792     -10.575195       0.000000       0.111541   -9999.000000   -9999.000000       0.024200       0.020000
53662     53662     shanxi         111.5717       38.7083           85       166     2012      02        04        035              0.017792      -8.711212       0.000000       0.121312   -9999.000000   -9999.000000       0.027400       0.062000
53662     53662     shanxi         111.5717       38.7083           85       166     2012      02        05        036              0.020083      -5.580353       0.000000       0.129879   -9999.000000   -9999.000000       0.025900       0.111000
53662     53662     shanxi         111.5717       38.7083           85       166     2012      02        06        037              0.017250      -5.119293       0.000000       0.146720   -9999.000000   -9999.000000       0.037700       0.060000
53662     53662     shanxi         111.5717       38.7083           85       166     2012      02        07        038              0.016125     -11.844269       0.000000       0.113179   -9999.000000   -9999.000000       0.030700   -9999.000000
53662     53662     shanxi         111.5717       38.7083           85       166     2012      02        08        039              0.016167     -12.123566       0.000000       0.108975   -9999.000000   -9999.000000       0.039800       0.015000
53662     53662     shanxi         111.5717       38.7083           85       166     2012      02        09        040              0.016250     -10.798492       0.000000       0.110643   -9999.000000   -9999.000000       0.029300       0.098000
53662     53662     shanxi         111.5717       38.7083           85       166     2012      02        10        041              0.017167     -10.758087       0.000000       0.110427   -9999.000000   -9999.000000       0.029500       0.071000
53662     53662     shanxi         111.5717       38.7083           85       166     2012      02        11        042              0.019083      -8.509521       0.000000       0.122732   -9999.000000   -9999.000000   -9999.000000   -9999.000000
53662     53662     shanxi         111.5717       38.7083           85       166     2012      02        12        043              0.020167      -5.441193       0.000000       0.142433   -9999.000000   -9999.000000   -9999.000000       0.031000
53662     53662     shanxi         111.5717       38.7083           85       166     2012      02        13        044              0.023625      -5.627075       0.000000       0.131446       0.066000   -9999.000000   -9999.000000       0.034000
53662     53662     shanxi         111.5717       38.7083           85       166     2012      02        14        045              0.023167      -2.295685       0.000000       0.171080       0.068000   -9999.000000       0.040300       0.149000
53662     53662     shanxi         111.5717       38.7083           85       166     2012      02        15        046              0.020417      -3.551941       0.000000       0.162280   -9999.000000   -9999.000000       0.034500       0.089000
53662     53662     shanxi         111.5717       38.7083           85       166     2012      02        16        047              0.019500      -5.960327       0.000000       0.145384   -9999.000000   -9999.000000       0.035100   -9999.000000
53662     53662     shanxi         111.5717       38.7083           85       166     2012      02        17        048              0.018750      -8.122986       0.000000       0.122743   -9999.000000   -9999.000000   -9999.000000       0.038000
53662     53662     shanxi         111.5717       38.7083           85       166     2012      02        18        049              0.018833      -9.494080      12.188515       0.117676   -9999.000000   -9999.000000       0.035000       0.070000
53662     53662     shanxi         111.5717       38.7083           85       166     2012      02        19        050              0.020167      -8.668396       0.000000       0.124535       0.068000   -9999.000000       0.046000       0.121000
53662     53662     shanxi         111.5717       38.7083           85       166     2012      02        20        051              0.024042      -4.588898       0.000000       0.151905       0.075000   -9999.000000       0.039100       0.151000
53662     53662     shanxi         111.5717       38.7083           85       166     2012      02        21        052              0.032292      -1.009796       0.000000       0.182777   -9999.000000       0.089800   -9999.000000   -9999.000000
53662     53662     shanxi         111.5717       38.7083           85       166     2012      02        22        053              0.041458       2.233185       0.000000       0.216205   -9999.000000   -9999.000000       0.043600       0.166000
53662     53662     shanxi         111.5717       38.7083           85       166     2012      02        23        054              0.034125       1.329468       0.000000       0.206951       0.069000       0.039300       0.048800       0.164000
53662     53662     shanxi         111.5717       38.7083           85       166     2012      02        24        055              0.032042       1.536987       0.000000       0.214314   -9999.000000   -9999.000000       0.038500       0.168000
53662     53662     shanxi         111.5717       38.7083           85       166     2012      02        25        056              0.026917      -2.117035       0.000000       0.179263   -9999.000000   -9999.000000       0.037700       0.074000
53662     53662     shanxi         111.5717       38.7083           85       166     2012      02        26        057              0.028583      -5.175323       0.000000       0.134425   -9999.000000   -9999.000000       0.042300   -9999.000000
53662     53662     shanxi         111.5717       38.7083           85       166     2012      02        27        058              0.033083      -2.829987       0.000000       0.170693   -9999.000000   -9999.000000   -9999.000000       0.060000
53662     53662     shanxi         111.5717       38.7083           85       166     2012      02        28        059              0.036750      -0.043152       0.000000       0.191630       0.071000       0.153700   -9999.000000       0.164000
53662     53662     shanxi         111.5717       38.7083           85       166     2012      02        29        060              0.000000   -9999.000000       0.000000   -9999.000000       0.074000   -9999.000000   -9999.000000   -9999.000000
53662     53662     shanxi         111.5717       38.7083           85       166     2012      03        01        061              0.049958       1.222229       0.000000       0.204568       0.078000   -9999.000000       0.050800       0.154000
53662     53662     shanxi         111.5717       38.7083           85       166     2012      03        02        062              0.064167       1.064575       0.000000       0.208957   -9999.000000   -9999.000000       0.051400       0.264000
53662     53662     shanxi         111.5717       38.7083           85       166     2012      03        03        063              0.052375       2.388214       0.053241       0.226466   -9999.000000   -9999.000000       0.050800       0.172000
53662     53662     shanxi         111.5717       38.7083           85       166     2012      03        04        064              0.046792       0.914703       0.000000       0.212008       0.077000       0.090200       0.058100       0.340000
53662     53662     shanxi         111.5717       38.7083           85       166     2012      03        05        065              0.044208       1.854828       0.101054       0.224072       0.075000   -9999.000000   -9999.000000       0.267000
53662     53662     shanxi         111.5717       38.7083           85       166     2012      03        06        066              0.042417      -2.640198       0.000000       0.177013       0.086000       0.258300       0.047200       0.113000
53662     53662     shanxi         111.5717       38.7083           85       166     2012      03        07        067              0.000000      -1.469452       0.000000       0.179494       0.080000       0.053400       0.053100       0.425000
53662     53662     shanxi         111.5717       38.7083           85       166     2012      03        08        068              0.039000      -0.198151       0.000000       0.188814   -9999.000000   -9999.000000       0.050900       0.147000
53662     53662     shanxi         111.5717       38.7083           85       166     2012      03        09        069              0.055875      -0.435394       0.000000       0.188518       0.085000   -9999.000000       0.053400       0.269000
53662     53662     shanxi         111.5717       38.7083           85       166     2012      03        10        070              0.053000       1.307831       0.000000       0.209633       0.070000   -9999.000000       0.049300       0.174000
53662     53662     shanxi         111.5717       38.7083           85       166     2012      03        11        071              0.047750      -1.272675       0.000000       0.185880       0.070000   -9999.000000       0.052900   -9999.000000
53662     53662     shanxi         111.5717       38.7083           85       166     2012      03        12        072              0.057833       0.311615       0.000000       0.189807       0.072000       0.109800       0.047500       0.234000
53662     53662     shanxi         111.5717       38.7083           85       166     2012      03        13        073              0.066042       1.298401       1.906370       0.198942   -9999.000000   -9999.000000       0.054000       0.115000
53662     53662     shanxi         111.5717       38.7083           85       166     2012      03        14        074              0.095174       2.800598       0.000000       0.209550   -9999.000000   -9999.000000   -9999.000000       0.398000
53662     53662     shanxi         111.5717       38.7083           85       166     2012      03        15        075              0.102583       5.465729       0.086144       0.244465   -9999.000000   -9999.000000       0.063500       0.509000
53662     53662     shanxi         111.5717       38.7083           85       166     2012      03        16        076              0.107875       2.912689       0.000000       0.249355       0.077000   -9999.000000   -9999.000000   -9999.000000
53662     53662     shanxi         111.5717       38.7083           85       166     2012      03        17        077              0.102083       5.985992       0.518194       0.243948       0.074000   -9999.000000       0.052400       0.357000
53662     53662     shanxi         111.5717       38.7083           85       166     2012      03        18        078              0.096042       5.918213       0.000000       0.241074   -9999.000000   -9999.000000       0.062000       0.388000
53662     53662     shanxi         111.5717       38.7083           85       166     2012      03        19        079              0.096833       3.850800       0.202293       0.241286   -9999.000000   -9999.000000       0.051100       0.429000
53662     53662     shanxi         111.5717       38.7083           85       166     2012      03        20        080              0.100292       4.172729       0.000000       0.249592       0.068000       0.031600       0.055100       0.384000
53662     53662     shanxi         111.5717       38.7083           85       166     2012      03        21        081              0.096583       6.382294       0.047852       0.254847       0.075000   -9999.000000       0.064000   -9999.000000
53662     53662     shanxi         111.5717       38.7083           85       166     2012      03        22        082              0.104833       2.726227       0.591679       0.246820       0.097000   -9999.000000   -9999.000000       0.602000
53662     53662     shanxi         111.5717       38.7083           85       166     2012      03        23        083              0.097083       2.788849       0.000000       0.244496   -9999.000000   -9999.000000       0.047200       0.314000
53662     53662     shanxi         111.5717       38.7083           85       166     2012      03        24        084              0.093875       2.734589       0.000000       0.218784   -9999.000000   -9999.000000   -9999.000000       0.456000
53662     53662     shanxi         111.5717       38.7083           85       166     2012      03        25        085              0.000000       5.806305       0.000000       0.234826       0.066000   -9999.000000       0.052400       0.288000
53662     53662     shanxi         111.5717       38.7083           85       166     2012      03        26        086              0.095500       7.191742       0.233559       0.239040       0.061000   -9999.000000       0.065400   -9999.000000
53662     53662     shanxi         111.5717       38.7083           85       166     2012      03        27        087              0.094250       8.337891       0.235731       0.243154       0.066000   -9999.000000       0.062800       0.344000
53662     53662     shanxi         111.5717       38.7083           85       166     2012      03        28        088              0.100667       9.059357       1.271973       0.244700       0.090500       0.051900       0.081500       0.629000
53662     53662     shanxi         111.5717       38.7083           85       166     2012      03        29        089              0.108875      11.411682       0.000000       0.255999   -9999.000000   -9999.000000       0.052100       0.378000
53662     53662     shanxi         111.5717       38.7083           85       166     2012      03        30        090              0.098667       9.018097       0.000000       0.242924       0.068000       0.031100       0.057700       0.237000
53662     53662     shanxi         111.5717       38.7083           85       166     2012      03        31        091              0.096583       5.192596       0.000000       0.240653       0.059000   -9999.000000       0.052000       0.388000
53662     53662     shanxi         111.5717       38.7083           85       166     2012      04        01        092              0.095833       8.884064       1.702423       0.246008       0.070000   -9999.000000       0.061200       0.492000
53662     53662     shanxi         111.5717       38.7083           85       166     2012      04        02        093              0.087083      10.550079       0.165740       0.243368       0.074000       0.014600   -9999.000000       0.283000
53662     53662     shanxi         111.5717       38.7083           85       166     2012      04        03        094              0.087167       4.244263       0.000000       0.218386   -9999.000000   -9999.000000       0.052600       0.290000
53662     53662     shanxi         111.5717       38.7083           85       166     2012      04        04        095              0.089417       6.998444       0.000000       0.228412   -9999.000000       0.142800       0.058200   -9999.000000
53662     53662     shanxi         111.5717       38.7083           85       166     2012      04        05        096              0.087583       9.155609       0.000000       0.231751       0.058000   -9999.000000       0.045400       0.206000
53662     53662     shanxi         111.5717       38.7083           85       166     2012      04        06        097              0.087458       8.911896       0.000000       0.230118       0.067000   -9999.000000       0.046600       0.297000
53662     53662     shanxi         111.5717       38.7083           85       166     2012      04        07        098              0.086250      10.472107       0.000000       0.229617       0.064000       0.005200       0.053900       0.295000
53662     53662     shanxi         111.5717       38.7083           85       166     2012      04        08        099              0.085458      11.847229       0.000000       0.226992       0.069000   -9999.000000       0.060300       0.279000
53662     53662     shanxi         111.5717       38.7083           85       166     2012      04        09        100              0.084125      14.079590       0.054669       0.222209       0.071000   -9999.000000       0.047200   -9999.000000
53662     53662     shanxi         111.5717       38.7083           85       166     2012      04        10        101              0.080708      15.130646       0.472124       0.219084       0.075000   -9999.000000       0.061300       0.174000
53662     53662     shanxi         111.5717       38.7083           85       166     2012      04        11        102              0.079458      12.268250       2.404914       0.225080       0.061000   -9999.000000       0.057600       0.392000
53662     53662     shanxi         111.5717       38.7083           85       166     2012      04        12        103              0.088500       6.053009       3.157452       0.239402       0.070000       0.007600       0.061900       0.692000
53662     53662     shanxi         111.5717       38.7083           85       166     2012      04        13        104              0.086625      10.374939       1.759333       0.265195       0.064000   -9999.000000       0.055200       0.416000
53662     53662     shanxi         111.5717       38.7083           85       166     2012      04        14        105              0.085542      12.216461       0.700825       0.246062       0.068000       0.045200       0.049900   -9999.000000
53662     53662     shanxi         111.5717       38.7083           85       166     2012      04        15        106              0.083375      13.684082       0.000000       0.235709       0.055000   -9999.000000       0.048600       0.278000
53662     53662     shanxi         111.5717       38.7083           85       166     2012      04        16        107              0.081250      13.589996       0.786967       0.227745       0.055500   -9999.000000       0.060000       0.410000
53662     53662     shanxi         111.5717       38.7083           85       166     2012      04        17        108              0.080042      13.713074       0.000000       0.221676       0.054000       0.212300       0.048600       0.366000
53662     53662     shanxi         111.5717       38.7083           85       166     2012      04        18        109              0.078542      16.211639       5.182428       0.217220       0.059000   -9999.000000   -9999.000000       0.384000
53662     53662     shanxi         111.5717       38.7083           85       166     2012      04        19        110              0.077208      14.877228       0.000000       0.252888       0.063000   -9999.000000   -9999.000000   -9999.000000
53662     53662     shanxi         111.5717       38.7083           85       166     2012      04        20        111              0.075750      13.760071       0.368753       0.242966       0.066000   -9999.000000       0.054900       0.168000
53662     53662     shanxi         111.5717       38.7083           85       166     2012      04        21        112              0.075458      15.010162       0.000000       0.235491       0.055500   -9999.000000       0.060800       0.198000
53662     53662     shanxi         111.5717       38.7083           85       166     2012      04        22        113              0.075417      16.307495       0.000000       0.225545       0.059000   -9999.000000   -9999.000000       0.251000
53662     53662     shanxi         111.5717       38.7083           85       166     2012      04        23        114              0.089583      19.850647      36.325050       0.213689       0.060000   -9999.000000       0.046800       0.907000
53662     53662     shanxi         111.5717       38.7083           85       166     2012      04        24        115              0.120708      20.581451       0.154557       0.290403   -9999.000000   -9999.000000       0.081500   -9999.000000
53662     53662     shanxi         111.5717       38.7083           85       166     2012      04        25        116              0.000000      10.733490       0.000000       0.313929   -9999.000000       0.132600       0.067700       0.479000
53662     53662     shanxi         111.5717       38.7083           85       166     2012      04        26        117              0.087417       9.498444       0.000000       0.294596       0.062000   -9999.000000       0.054700       0.425000
53662     53662     shanxi         111.5717       38.7083           85       166     2012      04        27        118              0.085458      14.788300       0.000000       0.281987       0.057000       0.102800   -9999.000000       0.313000
53662     53662     shanxi         111.5717       38.7083           85       166     2012      04        28        119              0.084958      14.171875       0.000000       0.272022       0.056000   -9999.000000       0.048800       0.329000
53662     53662     shanxi         111.5717       38.7083           85       166     2012      04        29        120              0.085208      17.420776       0.000000       0.262859       0.065000       0.282400       0.053700       0.189000
53662     53662     shanxi         111.5717       38.7083           85       166     2012      04        30        121              0.082875      20.044067      17.208252       0.253858       0.087000       0.004600   -9999.000000       0.940000
53662     53662     shanxi         111.5717       38.7083           85       166     2012      05        01        122              0.079625      19.216827       1.467505       0.295887       0.092000   -9999.000000       0.088200       0.664000
53662     53662     shanxi         111.5717       38.7083           85       166     2012      05        02        123              0.081292      14.308624       0.000000       0.309354       0.064500       0.203600       0.064800       0.361000
53662     53662     shanxi         111.5717       38.7083           85       166     2012      05        03        124              0.081542      18.583405       0.157655       0.289452       0.057000   -9999.000000       0.070100   -9999.000000
53662     53662     shanxi         111.5717       38.7083           85       166     2012      05        04        125              0.081750      19.879425       0.000000       0.276966       0.057000   -9999.000000       0.053400       0.257000
53662     53662     shanxi         111.5717       38.7083           85       166     2012      05        05        126              0.081375      20.466919       0.000000       0.264974       0.064000   -9999.000000       0.056700       0.209000
53662     53662     shanxi         111.5717       38.7083           85       166     2012      05        06        127              0.080042      20.176483       0.000000       0.254558       0.057000   -9999.000000   -9999.000000       0.297000
53662     53662     shanxi         111.5717       38.7083           85       166     2012      05        07        128              0.079125      21.307404       0.956405       0.247100   -9999.000000   -9999.000000       0.061500       0.469000
53662     53662     shanxi         111.5717       38.7083           85       166     2012      05        08        129              0.079833      21.699188       4.125019       0.250232       0.056000       0.022300       0.081100   -9999.000000
53662     53662     shanxi         111.5717       38.7083           85       166     2012      05        09        130              0.090125      23.356354      13.047387       0.247605       0.067000   -9999.000000       0.050900       0.911000
53662     53662     shanxi         111.5717       38.7083           85       166     2012      05        10        131              0.110250      19.764923       8.237201       0.310155   -9999.000000   -9999.000000       0.066300       0.629000
53662     53662     shanxi         111.5717       38.7083           85       166     2012      05        11        132              0.126083      22.367157       0.655148       0.299172       0.108000   -9999.000000       0.094500       0.898000
53662     53662     shanxi         111.5717       38.7083           85       166     2012      05        12        133              0.115583      16.714417       0.000000       0.305541       0.064500   -9999.000000       0.073800       0.402000
53662     53662     shanxi         111.5717       38.7083           85       166     2012      05        13        134              0.107208      15.019653       0.000000       0.285486       0.069000       0.252000       0.059600   -9999.000000
53662     53662     shanxi         111.5717       38.7083           85       166     2012      05        14        135              0.101833      14.164490       0.284224       0.276525       0.062000   -9999.000000       0.091600       0.235000
53662     53662     shanxi         111.5717       38.7083           85       166     2012      05        15        136              0.098917      14.211731       0.000000       0.270147       0.074000       0.183300       0.072700       0.175000
53662     53662     shanxi         111.5717       38.7083           85       166     2012      05        16        137              0.096833      16.363007       0.000000       0.261883       0.067000   -9999.000000       0.075300       0.231000
53662     53662     shanxi         111.5717       38.7083           85       166     2012      05        17        138              0.097042      16.605896       0.000000       0.254358       0.061500   -9999.000000       0.074500       0.185000
53662     53662     shanxi         111.5717       38.7083           85       166     2012      05        18        139              0.097375      19.435333       0.200071       0.244542       0.066000   -9999.000000       0.079600   -9999.000000
53662     53662     shanxi         111.5717       38.7083           85       166     2012      05        19        140              0.096542      21.811249       0.045224       0.237408       0.064000   -9999.000000       0.077100       0.185000
53662     53662     shanxi         111.5717       38.7083           85       166     2012      05        20        141              0.092875      24.421814       0.265869       0.228584   -9999.000000       0.127300       0.082500       0.292000
53662     53662     shanxi         111.5717       38.7083           85       166     2012      05        21        142              0.086083      24.523468       3.003447       0.219929       0.111000   -9999.000000       0.129800       0.265000
53662     53662     shanxi         111.5717       38.7083           85       166     2012      05        22        143              0.086542      15.255676       0.000000       0.252076       0.071500   -9999.000000       0.093800       0.197000
53662     53662     shanxi         111.5717       38.7083           85       166     2012      05        23        144              0.085958      17.611023       0.509570       0.242650   -9999.000000   -9999.000000   -9999.000000   -9999.000000
53662     53662     shanxi         111.5717       38.7083           85       166     2012      05        24        145              0.086625      17.021576       0.000000       0.236586       0.075000   -9999.000000       0.096400       0.144000
53662     53662     shanxi         111.5717       38.7083           85       166     2012      05        25        146              0.000000      18.713745       0.030715       0.228994       0.074000   -9999.000000       0.105400       0.238000
53662     53662     shanxi         111.5717       38.7083           85       166     2012      05        26        147              0.085875      19.124817       0.050299       0.223935       0.069000       0.070800       0.082000       0.253000
53662     53662     shanxi         111.5717       38.7083           85       166     2012      05        27        148              0.085833      21.798096       0.000000       0.212807       0.066000   -9999.000000       0.086300       0.161000
53662     53662     shanxi         111.5717       38.7083           85       166     2012      05        28        149              0.087125      23.525543      16.671793       0.203046       0.064000       0.044400       0.090800       0.134000
53662     53662     shanxi         111.5717       38.7083           85       166     2012      05        29        150              0.110250      23.930969       0.317756       0.239304       0.078000   -9999.000000       0.123600       0.515000
53662     53662     shanxi         111.5717       38.7083           85       166     2012      05        30        151              0.103917      17.767120       0.342902       0.284498       0.064000   -9999.000000       0.104500   -9999.000000
53662     53662     shanxi         111.5717       38.7083           85       166     2012      05        31        152              0.108125      19.786469      19.759993       0.260120       0.146000   -9999.000000   -9999.000000   -9999.000000
53662     53662     shanxi         111.5717       38.7083           85       166     2012      06        01        153              0.113667      19.318726       0.934029       0.315370       0.113000   -9999.000000       0.121000   -9999.000000
53662     53662     shanxi         111.5717       38.7083           85       166     2012      06        02        154              0.109250      18.797150       6.283354       0.301015       0.080000       0.218900       0.106600       0.680000
53662     53662     shanxi         111.5717       38.7083           85       166     2012      06        03        155              0.119583      20.550934       4.943147       0.297188   -9999.000000   -9999.000000   -9999.000000       0.829000
53662     53662     shanxi         111.5717       38.7083           85       166     2012      06        04        156              0.115208      18.362518       0.285650       0.313232       0.079000   -9999.000000       0.102700       0.756000
53662     53662     shanxi         111.5717       38.7083           85       166     2012      06        05        157              0.109042      21.372772       2.795736       0.287349   -9999.000000       0.028300       0.106200       0.344000
53662     53662     shanxi         111.5717       38.7083           85       166     2012      06        06        158              0.100917      22.178986       2.303695       0.280520       0.098000   -9999.000000       0.128500   -9999.000000
53662     53662     shanxi         111.5717       38.7083           85       166     2012      06        07        159              0.097875      17.694275       2.644348       0.295870       0.107000   -9999.000000       0.104000       0.727000
53662     53662     shanxi         111.5717       38.7083           85       166     2012      06        08        160              0.098250      18.358734       0.000000       0.294854       0.080000   -9999.000000       0.096200       0.458000
53662     53662     shanxi         111.5717       38.7083           85       166     2012      06        09        161              0.097375      21.076782       2.643223       0.282515       0.071000   -9999.000000   -9999.000000       0.405000
53662     53662     shanxi         111.5717       38.7083           85       166     2012      06        10        162              0.093458      20.501221       0.000000       0.282513       0.082000       0.106800       0.085200       0.242000
53662     53662     shanxi         111.5717       38.7083           85       166     2012      06        11        163              0.000000      18.197754       0.000000       0.268615       0.095000   -9999.000000       0.123800   -9999.000000
53662     53662     shanxi         111.5717       38.7083           85       166     2012      06        12        164              0.090167      19.224548       0.000000       0.257368       0.075000       0.032100       0.113200       0.221000
53662     53662     shanxi         111.5717       38.7083           85       166     2012      06        13        165              0.087917      21.173920       0.000000       0.248476       0.071500       0.083000       0.119100       0.219000
53662     53662     shanxi         111.5717       38.7083           85       166     2012      06        14        166              0.083958      20.767700       0.000000       0.241922       0.080000   -9999.000000       0.115100       0.275000
53662     53662     shanxi         111.5717       38.7083           85       166     2012      06        15        167              0.083542      18.759644       0.000000       0.238753       0.079500       0.151200       0.133700       0.232000
53662     53662     shanxi         111.5717       38.7083           85       166     2012      06        16        168              0.083833      20.158020       0.000000       0.232448       0.082000   -9999.000000       0.121700   -9999.000000
53662     53662     shanxi         111.5717       38.7083           85       166     2012      06        17        169              0.083292      22.933838       0.000000       0.222520       0.079000   -9999.000000       0.130000       0.278000
53662     53662     shanxi         111.5717       38.7083           85       166     2012      06        18        170              0.080125      25.306549       0.513495       0.211957       0.076000       0.030800       0.077600       0.416000
53662     53662     shanxi         111.5717       38.7083           85       166     2012      06        19        171              0.077708      25.028198       0.384584       0.211371       0.090000   -9999.000000       0.085000       0.278000
53662     53662     shanxi         111.5717       38.7083           85       166     2012      06        20        172              0.076125      24.017853       0.394297       0.211155       0.074000       0.158100   -9999.000000       0.268000
53662     53662     shanxi         111.5717       38.7083           85       166     2012      06        21        173              0.075750      24.615906       9.807734       0.207991       0.122000   -9999.000000       0.112100   -9999.000000
53662     53662     shanxi         111.5717       38.7083           85       166     2012      06        22        174              0.082875      24.045013       0.203302       0.246948   -9999.000000   -9999.000000       0.105500       0.622000
53662     53662     shanxi         111.5717       38.7083           85       166     2012      06        23        175              0.081292      25.527222       4.675388       0.254071       0.103000       0.189200       0.077400       0.768000
53662     53662     shanxi         111.5717       38.7083           85       166     2012      06        24        176              0.079792      25.118805       2.788839       0.256005       0.102000   -9999.000000       0.077300       0.684000
53662     53662     shanxi         111.5717       38.7083           85       166     2012      06        25        177              0.078792      22.683807       7.116013       0.265708       0.101000       0.290600       0.136700       0.655000
53662     53662     shanxi         111.5717       38.7083           85       166     2012      06        26        178              0.076083      23.973816       3.145464       0.280276       0.126000   -9999.000000   -9999.000000       0.805000
53662     53662     shanxi         111.5717       38.7083           85       166     2012      06        27        179              0.072667      23.162506      10.074785       0.284213       0.126000   -9999.000000       0.179200       0.858000
53662     53662     shanxi         111.5717       38.7083           85       166     2012      06        28        180              0.118125      21.148895      23.960836       0.293185       0.159000       0.413700       0.179500       0.910000
53662     53662     shanxi         111.5717       38.7083           85       166     2012      06        29        181              0.151458      18.827850       0.066363       0.335766       0.128500   -9999.000000       0.165000       1.000000
53662     53662     shanxi         111.5717       38.7083           85       166     2012      06        30        182              0.128458      21.545349       0.000000       0.323403       0.094000       0.264800       0.136200   -9999.000000
53662     53662     shanxi         111.5717       38.7083           85       166     2012      07        01        183              0.117083      24.052551       0.000000       0.300908       0.099500       0.341400       0.125000       0.545000
53662     53662     shanxi         111.5717       38.7083           85       166     2012      07        02        184              0.108625      24.889923       0.000000       0.288038       0.100000   -9999.000000       0.116600       0.356000
53662     53662     shanxi         111.5717       38.7083           85       166     2012      07        03        185              0.100042      24.999847       1.586710       0.275371       0.098000       0.219000       0.122500       0.456000
53662     53662     shanxi         111.5717       38.7083           85       166     2012      07        04        186              0.092750      24.412476       1.120678       0.274982       0.099000   -9999.000000       0.138900       0.396000
53662     53662     shanxi         111.5717       38.7083           85       166     2012      07        05        187              0.086458      25.130219       0.085366       0.270155       0.095000   -9999.000000       0.101500   -9999.000000
53662     53662     shanxi         111.5717       38.7083           85       166     2012      07        06        188              0.077625      26.435822       0.332364       0.258687   -9999.000000       0.103600       0.107200       0.378000
53662     53662     shanxi         111.5717       38.7083           85       166     2012      07        07        189              0.070208      26.725311       0.000000       0.250659   -9999.000000   -9999.000000   -9999.000000       0.303000
53662     53662     shanxi         111.5717       38.7083           85       166     2012      07        08        190              0.084583      24.221985       9.244677       0.248996       0.122000       0.404200       0.135300       0.381000
53662     53662     shanxi         111.5717       38.7083           85       166     2012      07        09        191              0.106125      22.569244       2.670801       0.288792       0.107000   -9999.000000       0.129200       0.716000
53662     53662     shanxi         111.5717       38.7083           85       166     2012      07        10        192              0.107542      24.180267       9.809800       0.288879       0.092000   -9999.000000       0.118300   -9999.000000
53662     53662     shanxi         111.5717       38.7083           85       166     2012      07        11        193              0.103917      24.494110       0.000000       0.311583       0.094000       0.183100       0.099300       0.585000
53662     53662     shanxi         111.5717       38.7083           85       166     2012      07        12        194              0.095167      24.806152       0.000000       0.283828       0.101000       0.178300       0.096000       0.388000
53662     53662     shanxi         111.5717       38.7083           85       166     2012      07        13        195              0.087208      25.325165       2.327616       0.269034       0.093000       0.213600       0.109800       0.387000
53662     53662     shanxi         111.5717       38.7083           85       166     2012      07        14        196              0.153583      25.741364      34.392254       0.262826       0.108000   -9999.000000       0.118100       0.929000
53662     53662     shanxi         111.5717       38.7083           85       166     2012      07        15        197              0.157917      22.857056       1.764883       0.351197       0.093000   -9999.000000       0.121800   -9999.000000
53662     53662     shanxi         111.5717       38.7083           85       166     2012      07        16        198              0.132375      23.259369       0.000000       0.324132       0.086000       0.268100       0.115800       0.728000
53662     53662     shanxi         111.5717       38.7083           85       166     2012      07        17        199              0.131333      23.951172       0.000000       0.303373       0.092000   -9999.000000       0.117400       0.480000
53662     53662     shanxi         111.5717       38.7083           85       166     2012      07        18        200              0.133375      23.226318       0.249307       0.291467       0.093000       0.134300       0.109000       0.492000
53662     53662     shanxi         111.5717       38.7083           85       166     2012      07        19        201              0.126583      23.677826       0.000000       0.285901       0.085000       0.080900       0.115400       0.348000
53662     53662     shanxi         111.5717       38.7083           85       166     2012      07        20        202              0.120913      24.224884      14.456762       0.276702       0.078000       0.346900       0.119800   -9999.000000
53662     53662     shanxi         111.5717       38.7083           85       166     2012      07        21        203              0.198826      25.525360      53.308292       0.291556       0.209000   -9999.000000       0.161000       0.954000
53662     53662     shanxi         111.5717       38.7083           85       166     2012      07        22        204              0.171917      19.772003       0.929055       0.380713       0.163000   -9999.000000       0.141300       0.827000
53662     53662     shanxi         111.5717       38.7083           85       166     2012      07        23        205              0.152750      21.762695       0.184577       0.336224       0.154000   -9999.000000       0.169300       0.754000
53662     53662     shanxi         111.5717       38.7083           85       166     2012      07        24        206              0.143167      21.930664       1.356269       0.324715       0.148000       0.258400   -9999.000000       0.802000
53662     53662     shanxi         111.5717       38.7083           85       166     2012      07        25        207              0.165375      23.119629      10.697052       0.319048       0.163500       0.266900       0.189900       1.000000
53662     53662     shanxi         111.5717       38.7083           85       166     2012      07        26        208              0.187958      22.839874      16.452229       0.340899       0.150000   -9999.000000       0.160600       0.936000
53662     53662     shanxi         111.5717       38.7083           85       166     2012      07        27        209              0.221667      25.404449      32.807831       0.344722   -9999.000000   -9999.000000       0.174300       0.918000
53662     53662     shanxi         111.5717       38.7083           85       166     2012      07        28        210              0.200083      22.387817       3.944771       0.366020       0.159000   -9999.000000       0.179200       1.000000
53662     53662     shanxi         111.5717       38.7083           85       166     2012      07        29        211              0.171833      23.772552       0.000000       0.355036       0.145000       0.204900       0.179800   -9999.000000
53662     53662     shanxi         111.5717       38.7083           85       166     2012      07        30        212              0.203625      24.516449      41.994770       0.334038       0.168000   -9999.000000       0.229800       0.991000
53662     53662     shanxi         111.5717       38.7083           85       166     2012      07        31        213              0.196125      20.372925       0.042670       0.380033       0.167500       0.391100       0.187400       0.884000
53662     53662     shanxi         111.5717       38.7083           85       166     2012      08        01        214              0.173458      21.754700       0.490451       0.348839       0.199000   -9999.000000       0.216100       0.964000
53662     53662     shanxi         111.5717       38.7083           85       166     2012      08        02        215              0.156500      23.990601       0.000000       0.334231       0.178000   -9999.000000       0.179700       0.801000
53662     53662     shanxi         111.5717       38.7083           85       166     2012      08        03        216              0.143917      25.220673       0.727213       0.323010       0.171000       0.183300       0.173900   -9999.000000
53662     53662     shanxi         111.5717       38.7083           85       166     2012      08        04        217              0.133625      25.458649       0.743523       0.316042       0.155000   -9999.000000   -9999.000000       0.732000
53662     53662     shanxi         111.5717       38.7083           85       166     2012      08        05        218              0.126000      25.115326       0.000000       0.309896       0.131500       0.141100       0.176200       0.592000
53662     53662     shanxi         111.5717       38.7083           85       166     2012      08        06        219              0.122750      25.200714       1.980237       0.301966       0.137000       0.236500       0.170600       0.627000
53662     53662     shanxi         111.5717       38.7083           85       166     2012      08        07        220              0.123958      24.672241       5.378987       0.304541       0.127000   -9999.000000       0.146200       0.563000
53662     53662     shanxi         111.5717       38.7083           85       166     2012      08        08        221              0.158458      26.315796       0.366004       0.302374       0.158000   -9999.000000       0.163000   -9999.000000
53662     53662     shanxi         111.5717       38.7083           85       166     2012      08        09        222              0.142167      23.071320       0.000000       0.307930       0.154000   -9999.000000       0.160500       0.643000
53662     53662     shanxi         111.5717       38.7083           85       166     2012      08        10        223              0.129500      23.705566       0.497054       0.293295       0.128000   -9999.000000   -9999.000000       0.472000
53662     53662     shanxi         111.5717       38.7083           85       166     2012      08        11        224              0.143667      23.840607       8.862296       0.287316       0.164500       0.016300       0.177500       0.511000
53662     53662     shanxi         111.5717       38.7083           85       166     2012      08        12        225              0.156708      20.938446       1.436923       0.314719       0.146000   -9999.000000       0.178600       0.662000
53662     53662     shanxi         111.5717       38.7083           85       166     2012      08        13        226              0.144000      22.311462       6.766117       0.302812       0.139000   -9999.000000       0.168400   -9999.000000
53662     53662     shanxi         111.5717       38.7083           85       166     2012      08        14        227              0.156750      22.506287       3.894220       0.303944       0.183000   -9999.000000       0.197100       0.943000
53662     53662     shanxi         111.5717       38.7083           85       166     2012      08        15        228              0.148250      21.342163       0.000000       0.321194       0.153000   -9999.000000       0.181700       0.684000
53662     53662     shanxi         111.5717       38.7083           85       166     2012      08        16        229              0.137208      22.708801       0.135705       0.302669       0.123000       0.131900       0.192600       0.669000
53662     53662     shanxi         111.5717       38.7083           85       166     2012      08        17        230              0.132917      23.801361       7.174773       0.293642   -9999.000000       0.340300       0.173200       0.847000
53662     53662     shanxi         111.5717       38.7083           85       166     2012      08        18        231              0.144250      21.079437       4.018970       0.318092       0.199000       0.326800       0.213200   -9999.000000
53662     53662     shanxi         111.5717       38.7083           85       166     2012      08        19        232              0.141750      21.196289       0.652501       0.318846       0.155000   -9999.000000       0.171500       0.695000
53662     53662     shanxi         111.5717       38.7083           85       166     2012      08        20        233              0.132708      22.914825       0.289501       0.301598       0.146000       0.154000       0.182300       0.584000
53662     53662     shanxi         111.5717       38.7083           85       166     2012      08        21        234              0.125375      21.238831       0.000000       0.294888       0.145000       0.150000   -9999.000000       0.647000
53662     53662     shanxi         111.5717       38.7083           85       166     2012      08        22        235              0.120083      17.839386       0.000000       0.287131       0.133000   -9999.000000       0.168200   -9999.000000
53662     53662     shanxi         111.5717       38.7083           85       166     2012      08        23        236              0.115417      18.932861       0.000000       0.282057       0.145000       0.059900       0.193700       0.415000
53662     53662     shanxi         111.5717       38.7083           85       166     2012      08        24        237              0.110208      19.954102       0.000000       0.276513       0.169000       0.145600       0.188400       0.481000
53662     53662     shanxi         111.5717       38.7083           85       166     2012      08        25        238              0.000000      20.816559       3.229156       0.270517       0.166000   -9999.000000       0.165000       0.644000
53662     53662     shanxi         111.5717       38.7083           85       166     2012      08        26        239              0.103667      22.099915       1.686192       0.280415       0.158000   -9999.000000       0.165400       0.546000
53662     53662     shanxi         111.5717       38.7083           85       166     2012      08        27        240              0.101167      21.638306       1.486262       0.286167       0.147000   -9999.000000   -9999.000000   -9999.000000
53662     53662     shanxi         111.5717       38.7083           85       166     2012      08        28        241              0.097375      22.014496       0.000000       0.283080       0.140000   -9999.000000       0.153900       0.577000
53662     53662     shanxi         111.5717       38.7083           85       166     2012      08        29        242              0.092917      22.161896       0.000000       0.275305       0.140000       0.027600       0.172600       0.395000
53662     53662     shanxi         111.5717       38.7083           85       166     2012      08        30        243              0.088667      22.776459       0.000000       0.267211       0.151000   -9999.000000       0.145200       0.528000
53662     53662     shanxi         111.5717       38.7083           85       166     2012      08        31        244              0.086917      21.893982       4.521916       0.261406       0.140000   -9999.000000       0.160300       0.522000
53662     53662     shanxi         111.5717       38.7083           85       166     2012      09        01        245              0.171958      20.698181      38.301590       0.275386       0.173000   -9999.000000       0.189800   -9999.000000
53662     53662     shanxi         111.5717       38.7083           85       166     2012      09        02        246              0.175583      15.997986       0.070526       0.363892       0.197000       0.164800       0.182400       0.921000
53662     53662     shanxi         111.5717       38.7083           85       166     2012      09        03        247              0.158542      17.005585       0.193163       0.327893       0.175000       0.118700       0.174500       0.745000
53662     53662     shanxi         111.5717       38.7083           85       166     2012      09        04        248              0.148208      15.951172       0.140826       0.316388       0.160000       0.217200       0.168600       0.787000
53662     53662     shanxi         111.5717       38.7083           85       166     2012      09        05        249              0.139792      16.709625       0.000000       0.308025       0.158000       0.100100       0.152800       0.611000
53662     53662     shanxi         111.5717       38.7083           85       166     2012      09        06        250              0.134125      18.979828       3.852145       0.302772       0.161000   -9999.000000       0.169100   -9999.000000
53662     53662     shanxi         111.5717       38.7083           85       166     2012      09        07        251              0.131667      17.161316       0.089552       0.312002       0.147000   -9999.000000   -9999.000000       0.758000
53662     53662     shanxi         111.5717       38.7083           85       166     2012      09        08        252              0.126833      18.624481       0.000000       0.303740       0.139000   -9999.000000       0.157200       0.609000
53662     53662     shanxi         111.5717       38.7083           85       166     2012      09        09        253              0.122500      18.636383       0.000000       0.297307       0.142000   -9999.000000       0.159900       0.630000
53662     53662     shanxi         111.5717       38.7083           85       166     2012      09        10        254              0.118333      19.413513       2.339704       0.290150       0.167000       0.161100       0.119300       0.774000
53662     53662     shanxi         111.5717       38.7083           85       166     2012      09        11        255              0.117250      16.347137       0.065185       0.299184       0.141500   -9999.000000       0.104100   -9999.000000
53662     53662     shanxi         111.5717       38.7083           85       166     2012      09        12        256              0.113667      15.983765       0.000000       0.293477       0.128000   -9999.000000       0.110500       0.496000
53662     53662     shanxi         111.5717       38.7083           85       166     2012      09        13        257              0.112583      11.342957       2.820524       0.290711       0.127000   -9999.000000       0.128200       0.669000
53662     53662     shanxi         111.5717       38.7083           85       166     2012      09        14        258              0.112667      12.882751       0.000000       0.298989       0.126000   -9999.000000       0.099300       0.647000
53662     53662     shanxi         111.5717       38.7083           85       166     2012      09        15        259              0.111522      14.461121       0.000000       0.292320       0.141000       0.090800       0.117500       0.378000
53662     53662     shanxi         111.5717       38.7083           85       166     2012      09        16        260              0.109958      15.438568       0.000000       0.287970       0.138000   -9999.000000       0.104900   -9999.000000
53662     53662     shanxi         111.5717       38.7083           85       166     2012      09        17        261              0.110125      15.408875       0.851411       0.286154       0.126500   -9999.000000       0.160400       0.419000
53662     53662     shanxi         111.5717       38.7083           85       166     2012      09        18        262              0.111958      16.286896       0.565725       0.287191       0.126000   -9999.000000       0.159000       0.370000
53662     53662     shanxi         111.5717       38.7083           85       166     2012      09        19        263              0.112542      16.569824       0.854542       0.284462       0.129000   -9999.000000       0.159300       0.436000
53662     53662     shanxi         111.5717       38.7083           85       166     2012      09        20        264              0.111667      17.020721       6.940063       0.281015       0.125000   -9999.000000       0.196400       0.353000
53662     53662     shanxi         111.5717       38.7083           85       166     2012      09        21        265              0.120417      17.165985       4.545268       0.288394   -9999.000000   -9999.000000       0.199800       0.852000
53662     53662     shanxi         111.5717       38.7083           85       166     2012      09        22        266              0.129167      13.128510       0.000000       0.318379       0.132000   -9999.000000       0.174200       0.663000
53662     53662     shanxi         111.5717       38.7083           85       166     2012      09        23        267              0.127000      16.404236       0.144755       0.300577       0.121500       0.229000       0.171900       0.562000
53662     53662     shanxi         111.5717       38.7083           85       166     2012      09        24        268              0.123167      17.418823      10.400024       0.294053       0.124000   -9999.000000   -9999.000000       0.770000
53662     53662     shanxi         111.5717       38.7083           85       166     2012      09        25        269              0.147625      17.127075      13.526663       0.305808   -9999.000000   -9999.000000       0.175600   -9999.000000
53662     53662     shanxi         111.5717       38.7083           85       166     2012      09        26        270              0.152583      11.347931       0.000000       0.344787       0.159000       0.156200       0.180200       0.865000
53662     53662     shanxi         111.5717       38.7083           85       166     2012      09        27        271              0.146000      15.550842       0.000000       0.319427   -9999.000000   -9999.000000       0.160500       0.626000
53662     53662     shanxi         111.5717       38.7083           85       166     2012      09        28        272              0.136867      11.415131       0.000000       0.310340       0.118000   -9999.000000       0.152000       0.665000
53662     53662     shanxi         111.5717       38.7083           85       166     2012      09        29        273              0.133375      10.521515       0.000000       0.305813       0.130000   -9999.000000       0.163700       0.467000
53662     53662     shanxi         111.5717       38.7083           85       166     2012      09        30        274              0.130333      11.160614       0.000000       0.301836       0.128000       0.350900       0.172300   -9999.000000
53662     53662     shanxi         111.5717       38.7083           85       166     2012      10        01        275              0.127417      11.852570       0.000000       0.298345       0.119000   -9999.000000       0.116300       0.449000
53662     53662     shanxi         111.5717       38.7083           85       166     2012      10        02        276              0.125292      13.444427       0.000000       0.295139       0.104000   -9999.000000       0.140400       0.473000
53662     53662     shanxi         111.5717       38.7083           85       166     2012      10        03        277              0.123417      14.329956       0.000000       0.292801       0.100000   -9999.000000       0.116600       0.583000
53662     53662     shanxi         111.5717       38.7083           85       166     2012      10        04        278              0.121000      13.799683       2.846306       0.289513       0.134000       0.129400       0.149600       0.732000
53662     53662     shanxi         111.5717       38.7083           85       166     2012      10        05        279              0.121417       9.976349       0.050056       0.303678       0.127000       0.111800   -9999.000000   -9999.000000
53662     53662     shanxi         111.5717       38.7083           85       166     2012      10        06        280              0.121583      10.173004       0.000000       0.297336       0.106000       0.143500       0.128000       0.484000
53662     53662     shanxi         111.5717       38.7083           85       166     2012      10        07        281              0.120583      12.338470       0.000000       0.292519       0.110000   -9999.000000       0.129300       0.476000
53662     53662     shanxi         111.5717       38.7083           85       166     2012      10        08        282              0.119875      12.567169       3.083600       0.291543       0.109000   -9999.000000       0.120400       0.449000
53662     53662     shanxi         111.5717       38.7083           85       166     2012      10        09        283              0.116875      13.532257       0.041406       0.299361       0.092000       0.107000       0.096500       0.378000
53662     53662     shanxi         111.5717       38.7083           85       166     2012      10        10        284              0.115917       9.582458       0.302068       0.295143       0.105000       0.167500       0.104600   -9999.000000
53662     53662     shanxi         111.5717       38.7083           85       166     2012      10        11        285              0.115458      10.581970       0.000000       0.292400       0.087000       0.125500   -9999.000000       0.376000
53662     53662     shanxi         111.5717       38.7083           85       166     2012      10        12        286              0.114000      11.934998       0.000000       0.288678       0.090000   -9999.000000       0.092000       0.439000
53662     53662     shanxi         111.5717       38.7083           85       166     2012      10        13        287              0.112917      11.811798       0.000000       0.286171       0.092000   -9999.000000       0.106100       0.353000
53662     53662     shanxi         111.5717       38.7083           85       166     2012      10        14        288              0.111500      11.430389       0.000000       0.284278       0.088500       0.054300       0.092200       0.401000
53662     53662     shanxi         111.5717       38.7083           85       166     2012      10        15        289              0.112833      12.732880      22.448547       0.283636       0.094000   -9999.000000       0.096300   -9999.000000
53662     53662     shanxi         111.5717       38.7083           85       166     2012      10        16        290              0.146125      11.135101       2.289611       0.318642       0.120000       0.166000       0.143800       0.798000
53662     53662     shanxi         111.5717       38.7083           85       166     2012      10        17        291              0.138875       5.855438       0.778312       0.323918       0.112000   -9999.000000       0.123500       0.626000
53662     53662     shanxi         111.5717       38.7083           85       166     2012      10        18        292              0.134708       5.552063       0.019349       0.314871   -9999.000000   -9999.000000       0.105700       0.623000
53662     53662     shanxi         111.5717       38.7083           85       166     2012      10        19        293              0.132750       6.061829       0.000000       0.308599       0.106000   -9999.000000       0.123700       0.517000
53662     53662     shanxi         111.5717       38.7083           85       166     2012      10        20        294              0.130875       8.230499       1.033866       0.307609       0.098000   -9999.000000       0.100200       0.628000
53662     53662     shanxi         111.5717       38.7083           85       166     2012      10        21        295              0.141875      11.396545      17.530651       0.306338   -9999.000000       0.054500       0.118900       0.823000
53662     53662     shanxi         111.5717       38.7083           85       166     2012      10        22        296              0.146042       4.814056       1.349735       0.342720   -9999.000000       0.134800   -9999.000000       0.662000
53662     53662     shanxi         111.5717       38.7083           85       166     2012      10        23        297              0.141583       5.695618       0.836592       0.326347   -9999.000000   -9999.000000       0.099900       0.755000
53662     53662     shanxi         111.5717       38.7083           85       166     2012      10        24        298              0.139292       6.723846       0.087967       0.319021   -9999.000000       0.207400       0.102700   -9999.000000
53662     53662     shanxi         111.5717       38.7083           85       166     2012      10        25        299              0.000000       7.611694       0.000000       0.314432       0.094000   -9999.000000       0.088400       0.614000
53662     53662     shanxi         111.5717       38.7083           85       166     2012      10        26        300              0.134167       8.600159       0.251991       0.311091       0.109000   -9999.000000       0.091500       0.547000
53662     53662     shanxi         111.5717       38.7083           85       166     2012      10        27        301              0.132125       6.416260       0.076066       0.310142       0.098000   -9999.000000       0.100500       0.642000
53662     53662     shanxi         111.5717       38.7083           85       166     2012      10        28        302              0.000000       7.344513       0.259246       0.307300       0.101000   -9999.000000   -9999.000000       0.555000
53662     53662     shanxi         111.5717       38.7083           85       166     2012      10        29        303              0.127250       9.048737       0.044792       0.304952   -9999.000000       0.134900       0.063900   -9999.000000
53662     53662     shanxi         111.5717       38.7083           85       166     2012      10        30        304              0.124125       5.472656       0.076332       0.283421       0.088000   -9999.000000       0.083000       0.349000
53662     53662     shanxi         111.5717       38.7083           85       166     2012      10        31        305              0.122417       3.379822       0.000000       0.270988       0.078000   -9999.000000       0.070000       0.321000
53662     53662     shanxi         111.5717       38.7083           85       166     2012      11        01        306              0.121417       3.892517       0.000000       0.276226       0.084000       0.037200       0.081900       0.438000
53662     53662     shanxi         111.5717       38.7083           85       166     2012      11        02        307              0.121167       4.628510       2.204440       0.289214       0.085000   -9999.000000       0.080800       0.418000
53662     53662     shanxi         111.5717       38.7083           85       166     2012      11        03        308              0.128708       7.356628       0.894645       0.295329   -9999.000000   -9999.000000       0.064700   -9999.000000
53662     53662     shanxi         111.5717       38.7083           85       166     2012      11        04        309              0.134500      -1.945984       1.742088       0.204719   -9999.000000       0.071600       0.061100       0.534000
53662     53662     shanxi         111.5717       38.7083           85       166     2012      11        05        310              0.135000      -3.650146       2.299116       0.133695   -9999.000000   -9999.000000       0.054700       0.570000
53662     53662     shanxi         111.5717       38.7083           85       166     2012      11        06        311              0.137958      -2.162933       1.806677       0.162221       0.104000       0.043600       0.064600       0.548000
53662     53662     shanxi         111.5717       38.7083           85       166     2012      11        07        312              0.135375       0.205353       0.296555       0.211713   -9999.000000   -9999.000000       0.064300       0.552000
53662     53662     shanxi         111.5717       38.7083           85       166     2012      11        08        313              0.132458      -0.086426       0.362980       0.207509   -9999.000000       0.051800   -9999.000000   -9999.000000
53662     53662     shanxi         111.5717       38.7083           85       166     2012      11        09        314              0.140417       1.451050       5.787934       0.240737       0.100000   -9999.000000       0.063300       0.672000
53662     53662     shanxi         111.5717       38.7083           85       166     2012      11        10        315              0.144958       2.069122       0.000000       0.274242   -9999.000000       0.211300       0.050500       0.479000
53662     53662     shanxi         111.5717       38.7083           85       166     2012      11        11        316              0.136917      -1.927948       0.000000       0.186223   -9999.000000       0.142400       0.053500       0.443000
53662     53662     shanxi         111.5717       38.7083           85       166     2012      11        12        317              0.126542      -2.923706       0.000000       0.154168   -9999.000000   -9999.000000       0.051200       0.418000
53662     53662     shanxi         111.5717       38.7083           85       166     2012      11        13        318              0.000000      -2.584259       0.000000       0.165906   -9999.000000   -9999.000000       0.043800   -9999.000000
53662     53662     shanxi         111.5717       38.7083           85       166     2012      11        14        319              0.090750      -2.618256       0.000000       0.160905   -9999.000000   -9999.000000       0.052200       0.434000
53662     53662     shanxi         111.5717       38.7083           85       166     2012      11        15        320              0.089500      -0.222839       0.000000       0.196372   -9999.000000   -9999.000000       0.045700       0.329000
53662     53662     shanxi         111.5717       38.7083           85       166     2012      11        16        321              0.087792      -1.213409       0.000000       0.175515   -9999.000000       0.056700       0.045500       0.391000
53662     53662     shanxi         111.5717       38.7083           85       166     2012      11        17        322              0.000000      -2.126556       0.000000       0.167825       0.105000   -9999.000000       0.056700       0.482000
53662     53662     shanxi         111.5717       38.7083           85       166     2012      11        18        323              0.068167       0.069611       0.000000       0.200639   -9999.000000   -9999.000000       0.050600       0.576000
53662     53662     shanxi         111.5717       38.7083           85       166     2012      11        19        324              0.060375      -0.694122       0.000000       0.195312   -9999.000000   -9999.000000       0.045500       0.418000
53662     53662     shanxi         111.5717       38.7083           85       166     2012      11        20        325              0.063458      -0.289337       0.000000       0.196206   -9999.000000   -9999.000000       0.055500       0.418000
53662     53662     shanxi         111.5717       38.7083           85       166     2012      11        21        326              0.079083       0.984741       0.000000       0.221787       0.104000   -9999.000000       0.049600       0.559000
53662     53662     shanxi         111.5717       38.7083           85       166     2012      11        22        327              0.087917       1.825226       0.000000       0.247709   -9999.000000   -9999.000000       0.038800   -9999.000000
53662     53662     shanxi         111.5717       38.7083           85       166     2012      11        23        328              0.060208      -1.927246       0.000000       0.172505   -9999.000000       0.258500       0.043100       0.519000
53662     53662     shanxi         111.5717       38.7083           85       166     2012      11        24        329              0.054708      -3.267242       0.000000       0.152978   -9999.000000       0.034000       0.041600       0.376000
53662     53662     shanxi         111.5717       38.7083           85       166     2012      11        25        330              0.052542      -0.968536       0.000000       0.180993   -9999.000000       0.163800   -9999.000000       0.386000
53662     53662     shanxi         111.5717       38.7083           85       166     2012      11        26        331              0.049000      -2.990417       0.000000       0.156212   -9999.000000   -9999.000000   -9999.000000       0.311000
53662     53662     shanxi         111.5717       38.7083           85       166     2012      11        27        332              0.048583      -2.448578       0.000000       0.156207   -9999.000000   -9999.000000       0.042100   -9999.000000
53662     53662     shanxi         111.5717       38.7083           85       166     2012      11        28        333              0.045500      -2.373627       0.000000       0.171349   -9999.000000   -9999.000000       0.041600       0.268000
53662     53662     shanxi         111.5717       38.7083           85       166     2012      11        29        334              0.044250      -5.502747       0.000000       0.135540   -9999.000000       0.048200       0.044100       0.236000
53662     53662     shanxi         111.5717       38.7083           85       166     2012      11        30        335              0.046458      -4.403351       0.000000       0.145749   -9999.000000   -9999.000000       0.041700       0.268000
53662     53662     shanxi         111.5717       38.7083           85       166     2012      12        01        336              0.047708      -2.357880       0.000000       0.157502   -9999.000000   -9999.000000       0.047400       0.207000
53662     53662     shanxi         111.5717       38.7083           85       166     2012      12        02        337              0.046042      -2.810089       0.000000       0.154753   -9999.000000       0.039700       0.039600   -9999.000000
53662     53662     shanxi         111.5717       38.7083           85       166     2012      12        03        338              0.043500      -3.303101       0.000000       0.151353   -9999.000000       0.169000       0.044900       0.160000
53662     53662     shanxi         111.5717       38.7083           85       166     2012      12        04        339              0.044958      -5.680695       0.000000       0.130524   -9999.000000       0.029500       0.041700       0.161000
53662     53662     shanxi         111.5717       38.7083           85       166     2012      12        05        340              0.043792      -4.525116       0.000000       0.135597   -9999.000000   -9999.000000       0.036200       0.192000
53662     53662     shanxi         111.5717       38.7083           85       166     2012      12        06        341              0.044125      -7.690948       0.000000       0.120798   -9999.000000   -9999.000000   -9999.000000       0.112000
53662     53662     shanxi         111.5717       38.7083           85       166     2012      12        07        342              0.044667      -6.998993       0.000000       0.119656   -9999.000000   -9999.000000       0.035900   -9999.000000
53662     53662     shanxi         111.5717       38.7083           85       166     2012      12        08        343              0.042833      -9.807434       0.000000       0.115344   -9999.000000   -9999.000000       0.039800       0.107000
53662     53662     shanxi         111.5717       38.7083           85       166     2012      12        09        344              0.042375     -12.336182       0.000000       0.110185   -9999.000000   -9999.000000       0.038800       0.136000
53662     53662     shanxi         111.5717       38.7083           85       166     2012      12        10        345              0.042792      -7.583588       0.115702       0.113675   -9999.000000   -9999.000000       0.033300       0.163000
53662     53662     shanxi         111.5717       38.7083           85       166     2012      12        11        346              0.043292      -6.886627       0.050852       0.123067   -9999.000000   -9999.000000       0.034700       0.147000
53662     53662     shanxi         111.5717       38.7083           85       166     2012      12        12        347              0.045792      -4.466034       0.000000       0.134546   -9999.000000   -9999.000000   -9999.000000   -9999.000000
53662     53662     shanxi         111.5717       38.7083           85       166     2012      12        13        348              0.046792      -2.846924       0.168403       0.156249   -9999.000000   -9999.000000       0.035400       0.171000
53662     53662     shanxi         111.5717       38.7083           85       166     2012      12        14        349              0.047833      -2.564026       0.000000       0.146320   -9999.000000   -9999.000000       0.039500       0.154000
53662     53662     shanxi         111.5717       38.7083           85       166     2012      12        15        350              0.000000      -2.748688       0.000000       0.151500   -9999.000000       0.069900       0.038200       0.235000
53662     53662     shanxi         111.5717       38.7083           85       166     2012      12        16        351              0.049583      -1.255127       0.000000       0.170762   -9999.000000   -9999.000000       0.034500       0.218000
53662     53662     shanxi         111.5717       38.7083           85       166     2012      12        17        352              0.044000      -2.620819       0.000000       0.156421   -9999.000000       0.049800       0.030100       0.194000
53662     53662     shanxi         111.5717       38.7083           85       166     2012      12        18        353              0.041696      -7.930695       0.000000       0.121665   -9999.000000   -9999.000000       0.039300       0.093000
53662     53662     shanxi         111.5717       38.7083           85       166     2012      12        19        354              0.043375      -6.320038       0.000000       0.122066   -9999.000000   -9999.000000       0.036100       0.129000
53662     53662     shanxi         111.5717       38.7083           85       166     2012      12        20        355              0.000000      -4.454834       0.000000       0.133359   -9999.000000   -9999.000000       0.032400       0.119000
53662     53662     shanxi         111.5717       38.7083           85       166     2012      12        21        356              0.044958      -5.277069       0.000000       0.123863   -9999.000000   -9999.000000       0.032200   -9999.000000
53662     53662     shanxi         111.5717       38.7083           85       166     2012      12        22        357              0.041750      -8.864563       0.000000       0.118284   -9999.000000   -9999.000000       0.028400       0.052000
53662     53662     shanxi         111.5717       38.7083           85       166     2012      12        23        358              0.039958     -14.051514       0.000000       0.111942   -9999.000000   -9999.000000   -9999.000000       0.058000
53662     53662     shanxi         111.5717       38.7083           85       166     2012      12        24        359              0.039625     -14.190063       0.000000       0.108881   -9999.000000   -9999.000000       0.033900       0.139000
53662     53662     shanxi         111.5717       38.7083           85       166     2012      12        25        360              0.039708     -12.535004       0.000000       0.109459   -9999.000000   -9999.000000       0.031400       0.116000
53662     53662     shanxi         111.5717       38.7083           85       166     2012      12        26        361              0.000000     -10.934021       0.000000       0.109949   -9999.000000   -9999.000000       0.032000   -9999.000000
53662     53662     shanxi         111.5717       38.7083           85       166     2012      12        27        362              0.039727      -8.109283       0.000000       0.114657   -9999.000000   -9999.000000       0.033800       0.121000
53662     53662     shanxi         111.5717       38.7083           85       166     2012      12        28        363              0.000000      -6.500946       0.000000       0.122746   -9999.000000   -9999.000000       0.027300       0.041000
53662     53662     shanxi         111.5717       38.7083           85       166     2012      12        29        364              0.000000      -9.433655       0.000000       0.114661   -9999.000000   -9999.000000       0.032600       0.072000
53662     53662     shanxi         111.5717       38.7083           85       166     2012      12        30        365              0.000000     -13.365540       0.000000       0.111185   -9999.000000   -9999.000000       0.028200       0.078000
53662     53662     shanxi         111.5717       38.7083           85       166     2012      12        31        366              0.040000     -11.080200       0.000000       0.110974   -9999.000000   -9999.000000       0.032200   -9999.000000
