# Supplementary material for: Research on Fusing Multisatellite Soil Moisture Data Based on Bayesian Model Averaging
Source: Hindawi journal article supplement (doi:10.1155/2018/9310838), 2018-06-25
Supplement: f1 [file 9310838.f1.zip › 2012_sm00-10cm_daily_ZDB_ZHY_53663_366days_allin.txt]

53663     53663     shanxi         111.8167       38.9167           84       167     2012      01        01        001              0.000000   -9999.000000       0.000000   -9999.000000   -9999.000000   -9999.000000       0.024700   -9999.000000
53663     53663     shanxi         111.8167       38.9167           84       167     2012      01        02        002              0.064250      -6.842468       0.000000       0.121585   -9999.000000   -9999.000000       0.031500       0.064000
53663     53663     shanxi         111.8167       38.9167           84       167     2012      01        03        003              0.000000     -10.599396       0.000000       0.113940   -9999.000000   -9999.000000       0.041700       0.015000
53663     53663     shanxi         111.8167       38.9167           84       167     2012      01        04        004              0.061458     -13.003876       0.000000       0.111641   -9999.000000   -9999.000000       0.027800       0.045000
53663     53663     shanxi         111.8167       38.9167           84       167     2012      01        05        005              0.061500     -12.328033       0.000000       0.111152   -9999.000000   -9999.000000       0.039300       0.015000
53663     53663     shanxi         111.8167       38.9167           84       167     2012      01        06        006              0.061708     -10.677826       0.000000       0.112205   -9999.000000   -9999.000000       0.027200       0.049000
53663     53663     shanxi         111.8167       38.9167           84       167     2012      01        07        007              0.063913      -8.476715       0.000000       0.115628   -9999.000000   -9999.000000       0.033700       0.091000
53663     53663     shanxi         111.8167       38.9167           84       167     2012      01        08        008              0.000000      -6.860535       0.000000       0.126060   -9999.000000   -9999.000000       0.029900       0.090000
53663     53663     shanxi         111.8167       38.9167           84       167     2012      01        09        009              0.062875      -8.602661       0.000000       0.120084   -9999.000000   -9999.000000   -9999.000000       0.033000
53663     53663     shanxi         111.8167       38.9167           84       167     2012      01        10        010              0.062208      -8.737152       0.000000       0.118980   -9999.000000   -9999.000000       0.028700       0.071000
53663     53663     shanxi         111.8167       38.9167           84       167     2012      01        11        011              0.061957      -9.885376       0.000000       0.115070   -9999.000000   -9999.000000       0.040300       0.051000
53663     53663     shanxi         111.8167       38.9167           84       167     2012      01        12        012              0.062167      -9.900848       0.000000       0.114828   -9999.000000   -9999.000000       0.032800       0.104000
53663     53663     shanxi         111.8167       38.9167           84       167     2012      01        13        013              0.062250      -9.141510       0.000000       0.118654   -9999.000000   -9999.000000       0.036800   -9999.000000
53663     53663     shanxi         111.8167       38.9167           84       167     2012      01        14        014              0.062958      -8.558105       0.000000       0.119995   -9999.000000   -9999.000000   -9999.000000       0.008000
53663     53663     shanxi         111.8167       38.9167           84       167     2012      01        15        015              0.062958      -7.059998       0.000000       0.126725   -9999.000000   -9999.000000       0.037000       0.038000
53663     53663     shanxi         111.8167       38.9167           84       167     2012      01        16        016              0.063208      -6.308380       0.000000       0.132679   -9999.000000   -9999.000000       0.037100       0.035000
53663     53663     shanxi         111.8167       38.9167           84       167     2012      01        17        017              0.000000      -6.060822       0.000000       0.130542   -9999.000000   -9999.000000       0.028500       0.074000
53663     53663     shanxi         111.8167       38.9167           84       167     2012      01        18        018              0.063583      -6.479675       0.000000       0.134097   -9999.000000   -9999.000000       0.030200   -9999.000000
53663     53663     shanxi         111.8167       38.9167           84       167     2012      01        19        019              0.065250      -5.640350       0.000000       0.135525   -9999.000000   -9999.000000       0.035000       0.012000
53663     53663     shanxi         111.8167       38.9167           84       167     2012      01        20        020              0.064333      -4.242065       0.000000       0.143486   -9999.000000   -9999.000000       0.035400   -9999.000000
53663     53663     shanxi         111.8167       38.9167           84       167     2012      01        21        021              0.063125      -9.797119       0.000000       0.119314   -9999.000000   -9999.000000       0.027400   -9999.000000
53663     53663     shanxi         111.8167       38.9167           84       167     2012      01        22        022              0.061500     -13.332458       0.000000       0.113395   -9999.000000   -9999.000000       0.032600       0.034000
53663     53663     shanxi         111.8167       38.9167           84       167     2012      01        23        023              0.061000     -15.053802       0.000000       0.110007   -9999.000000   -9999.000000       0.023000   -9999.000000
53663     53663     shanxi         111.8167       38.9167           84       167     2012      01        24        024              0.060917     -14.337494       0.000000       0.110135   -9999.000000   -9999.000000   -9999.000000       0.102000
53663     53663     shanxi         111.8167       38.9167           84       167     2012      01        25        025              0.061000     -12.947144       0.000000       0.110665   -9999.000000   -9999.000000       0.030500       0.003000
53663     53663     shanxi         111.8167       38.9167           84       167     2012      01        26        026              0.061417     -10.811890       0.000000       0.111281   -9999.000000   -9999.000000       0.031100       0.032000
53663     53663     shanxi         111.8167       38.9167           84       167     2012      01        27        027              0.062000      -8.644592       0.000000       0.116259   -9999.000000   -9999.000000       0.035300       0.041000
53663     53663     shanxi         111.8167       38.9167           84       167     2012      01        28        028              0.062250      -6.661072       0.000000       0.131684   -9999.000000   -9999.000000       0.031600   -9999.000000
53663     53663     shanxi         111.8167       38.9167           84       167     2012      01        29        029              0.062125      -7.907074       0.000000       0.125341   -9999.000000   -9999.000000       0.025900       0.042000
53663     53663     shanxi         111.8167       38.9167           84       167     2012      01        30        030              0.062625      -7.567291       0.000000       0.123466   -9999.000000   -9999.000000       0.031900       0.011000
53663     53663     shanxi         111.8167       38.9167           84       167     2012      01        31        031              0.063250      -5.567596       0.000000       0.134209   -9999.000000   -9999.000000   -9999.000000       0.107000
53663     53663     shanxi         111.8167       38.9167           84       167     2012      02        01        032              0.061250      -6.736359       0.000000       0.141155   -9999.000000   -9999.000000       0.033900       0.024000
53663     53663     shanxi         111.8167       38.9167           84       167     2012      02        02        033              0.060833     -12.095581       0.000000       0.112847   -9999.000000   -9999.000000       0.041600   -9999.000000
53663     53663     shanxi         111.8167       38.9167           84       167     2012      02        03        034              0.061208     -11.191132       0.000000       0.111486   -9999.000000   -9999.000000       0.028900       0.126000
53663     53663     shanxi         111.8167       38.9167           84       167     2012      02        04        035              0.062292      -9.236481       0.000000       0.118343   -9999.000000   -9999.000000       0.033900       0.059000
53663     53663     shanxi         111.8167       38.9167           84       167     2012      02        05        036              0.063625      -5.987122       0.000000       0.131697   -9999.000000   -9999.000000       0.037500       0.182000
53663     53663     shanxi         111.8167       38.9167           84       167     2012      02        06        037              0.061208      -5.291931       0.000000       0.140745   -9999.000000   -9999.000000       0.044800       0.020000
53663     53663     shanxi         111.8167       38.9167           84       167     2012      02        07        038              0.060375     -11.501007       0.000000       0.115463   -9999.000000   -9999.000000       0.038300       0.029000
53663     53663     shanxi         111.8167       38.9167           84       167     2012      02        08        039              0.060375     -11.926849       0.000000       0.111675   -9999.000000   -9999.000000       0.039600       0.054000
53663     53663     shanxi         111.8167       38.9167           84       167     2012      02        09        040              0.060417     -11.159454       0.000000       0.111569   -9999.000000   -9999.000000       0.034600       0.044000
53663     53663     shanxi         111.8167       38.9167           84       167     2012      02        10        041              0.060917     -10.868256       0.000000       0.111849   -9999.000000   -9999.000000       0.038000       0.087000
53663     53663     shanxi         111.8167       38.9167           84       167     2012      02        11        042              0.061750      -8.571136       0.000000       0.122637   -9999.000000   -9999.000000       0.039500   -9999.000000
53663     53663     shanxi         111.8167       38.9167           84       167     2012      02        12        043              0.062250      -5.334961       0.000000       0.140914   -9999.000000   -9999.000000   -9999.000000       0.002000
53663     53663     shanxi         111.8167       38.9167           84       167     2012      02        13        044              0.065708      -5.308655       0.000000       0.135596       0.069000   -9999.000000   -9999.000000       0.024000
53663     53663     shanxi         111.8167       38.9167           84       167     2012      02        14        045              0.066333      -2.335175       0.000000       0.166937   -9999.000000       0.184500       0.047500       0.090000
53663     53663     shanxi         111.8167       38.9167           84       167     2012      02        15        046              0.064042      -3.630737       0.000000       0.162931   -9999.000000   -9999.000000       0.038300       0.126000
53663     53663     shanxi         111.8167       38.9167           84       167     2012      02        16        047              0.061875      -6.029175       0.000000       0.143482   -9999.000000   -9999.000000       0.040500   -9999.000000
53663     53663     shanxi         111.8167       38.9167           84       167     2012      02        17        048              0.061125      -8.596283       0.000000       0.121553   -9999.000000   -9999.000000   -9999.000000       0.002000
53663     53663     shanxi         111.8167       38.9167           84       167     2012      02        18        049              0.061083      -9.878296       2.384537       0.115798   -9999.000000   -9999.000000       0.043800       0.076000
53663     53663     shanxi         111.8167       38.9167           84       167     2012      02        19        050              0.062292      -8.983734       0.290787       0.119356       0.070000   -9999.000000       0.051200       0.062000
53663     53663     shanxi         111.8167       38.9167           84       167     2012      02        20        051              0.065625      -4.686035       0.000000       0.150499       0.076000   -9999.000000       0.042200       0.182000
53663     53663     shanxi         111.8167       38.9167           84       167     2012      02        21        052              0.069500      -1.022552       0.000000       0.176102   -9999.000000   -9999.000000   -9999.000000   -9999.000000
53663     53663     shanxi         111.8167       38.9167           84       167     2012      02        22        053              0.071292       2.088104       0.000000       0.199419   -9999.000000   -9999.000000       0.048500       0.184000
53663     53663     shanxi         111.8167       38.9167           84       167     2012      02        23        054              0.070917       0.811249       0.000000       0.190287       0.066000       0.015200       0.051500       0.193000
53663     53663     shanxi         111.8167       38.9167           84       167     2012      02        24        055              0.070917       1.944885       0.000000       0.201915   -9999.000000   -9999.000000       0.037200       0.072000
53663     53663     shanxi         111.8167       38.9167           84       167     2012      02        25        056              0.069667      -2.124817       0.000000       0.175422   -9999.000000   -9999.000000       0.043900       0.037000
53663     53663     shanxi         111.8167       38.9167           84       167     2012      02        26        057              0.068792      -5.574890       0.000000       0.135082   -9999.000000       0.061800       0.045600   -9999.000000
53663     53663     shanxi         111.8167       38.9167           84       167     2012      02        27        058              0.069167      -3.173431       0.000000       0.161483   -9999.000000   -9999.000000   -9999.000000       0.166000
53663     53663     shanxi         111.8167       38.9167           84       167     2012      02        28        059              0.071625      -0.054382       0.000000       0.182928       0.072000       0.029200       0.057100       0.161000
53663     53663     shanxi         111.8167       38.9167           84       167     2012      02        29        060              0.000000   -9999.000000       0.000000   -9999.000000       0.072000   -9999.000000   -9999.000000   -9999.000000
53663     53663     shanxi         111.8167       38.9167           84       167     2012      03        01        061              0.076250       1.445557       0.000000       0.194151       0.082000   -9999.000000       0.049600       0.078000
53663     53663     shanxi         111.8167       38.9167           84       167     2012      03        02        062              0.083000       1.097076       0.000000       0.195844   -9999.000000   -9999.000000       0.051300   -9999.000000
53663     53663     shanxi         111.8167       38.9167           84       167     2012      03        03        063              0.088125       2.781738       0.000000       0.212185   -9999.000000   -9999.000000       0.052600       0.146000
53663     53663     shanxi         111.8167       38.9167           84       167     2012      03        04        064              0.087000       1.418213       0.000000       0.203545       0.073000       0.132400       0.060000       0.275000
53663     53663     shanxi         111.8167       38.9167           84       167     2012      03        05        065              0.085792       1.870239       0.000000       0.208080       0.078000   -9999.000000   -9999.000000       0.180000
53663     53663     shanxi         111.8167       38.9167           84       167     2012      03        06        066              0.077458      -2.426727       0.000000       0.172212       0.086000       0.379100       0.046000       0.139000
53663     53663     shanxi         111.8167       38.9167           84       167     2012      03        07        067              0.000000      -1.286926       0.000000       0.173723       0.082000       0.103400       0.053800       0.274000
53663     53663     shanxi         111.8167       38.9167           84       167     2012      03        08        068              0.076583      -0.226379       0.000000       0.179775   -9999.000000   -9999.000000       0.051600       0.201000
53663     53663     shanxi         111.8167       38.9167           84       167     2012      03        09        069              0.078542      -0.294739       0.000000       0.180511       0.079000   -9999.000000       0.055400       0.242000
53663     53663     shanxi         111.8167       38.9167           84       167     2012      03        10        070              0.078875       1.295685       0.000000       0.194023       0.068000       0.040800       0.053500       0.141000
53663     53663     shanxi         111.8167       38.9167           84       167     2012      03        11        071              0.077625      -0.998871       0.000000       0.176818       0.074000   -9999.000000       0.053500   -9999.000000
53663     53663     shanxi         111.8167       38.9167           84       167     2012      03        12        072              0.080667      -0.183990       0.000000       0.176708       0.074000       0.040200       0.048800       0.144000
53663     53663     shanxi         111.8167       38.9167           84       167     2012      03        13        073              0.084792       0.975006       0.000000       0.184453   -9999.000000   -9999.000000       0.051800       0.067000
53663     53663     shanxi         111.8167       38.9167           84       167     2012      03        14        074              0.100043       2.585907       0.237512       0.193464   -9999.000000   -9999.000000   -9999.000000       0.277000
53663     53663     shanxi         111.8167       38.9167           84       167     2012      03        15        075              0.101167       5.385193       0.218131       0.210821       0.088000       0.079100       0.068300       0.377000
53663     53663     shanxi         111.8167       38.9167           84       167     2012      03        16        076              0.146833       2.855072       0.000000       0.218243       0.082000   -9999.000000   -9999.000000   -9999.000000
53663     53663     shanxi         111.8167       38.9167           84       167     2012      03        17        077              0.153458       6.070251       0.405905       0.219694       0.074000       0.115000       0.052600       0.333000
53663     53663     shanxi         111.8167       38.9167           84       167     2012      03        18        078              0.149167       6.005829       0.000000       0.213259   -9999.000000   -9999.000000       0.061000       0.300000
53663     53663     shanxi         111.8167       38.9167           84       167     2012      03        19        079              0.151750       3.737793       0.134071       0.212529   -9999.000000   -9999.000000       0.058700       0.383000
53663     53663     shanxi         111.8167       38.9167           84       167     2012      03        20        080              0.156250       4.406891       1.371421       0.219650       0.074000       0.086900       0.062500       0.282000
53663     53663     shanxi         111.8167       38.9167           84       167     2012      03        21        081              0.145333       5.603302       0.480401       0.220292       0.083000   -9999.000000       0.073800   -9999.000000
53663     53663     shanxi         111.8167       38.9167           84       167     2012      03        22        082              0.156500       2.600342       1.029038       0.214795       0.095000   -9999.000000   -9999.000000       0.672000
53663     53663     shanxi         111.8167       38.9167           84       167     2012      03        23        083              0.150708       3.109863       0.000000       0.223636       0.098000   -9999.000000       0.054200       0.246000
53663     53663     shanxi         111.8167       38.9167           84       167     2012      03        24        084              0.141458       2.603699       0.000000       0.203266   -9999.000000   -9999.000000   -9999.000000       0.397000
53663     53663     shanxi         111.8167       38.9167           84       167     2012      03        25        085              0.000000       5.974335       0.451366       0.212209       0.073000   -9999.000000       0.061000       0.144000
53663     53663     shanxi         111.8167       38.9167           84       167     2012      03        26        086              0.140625       7.311951       0.456788       0.211496       0.065000   -9999.000000       0.063300   -9999.000000
53663     53663     shanxi         111.8167       38.9167           84       167     2012      03        27        087              0.141708       8.425964       0.529982       0.215253       0.072000   -9999.000000       0.067800       0.351000
53663     53663     shanxi         111.8167       38.9167           84       167     2012      03        28        088              0.142750       9.399475       1.126489       0.212309       0.092500       0.042800       0.082900       0.456000
53663     53663     shanxi         111.8167       38.9167           84       167     2012      03        29        089              0.145083      12.222473       0.000000       0.219832   -9999.000000   -9999.000000       0.055300       0.654000
53663     53663     shanxi         111.8167       38.9167           84       167     2012      03        30        090              0.140000       8.604401       0.000000       0.212989       0.072000       0.053000       0.062200       0.130000
53663     53663     shanxi         111.8167       38.9167           84       167     2012      03        31        091              0.139250       5.041412       0.000000       0.209781       0.066000   -9999.000000       0.057000       0.236000
53663     53663     shanxi         111.8167       38.9167           84       167     2012      04        01        092              0.139000       8.503052       0.131254       0.208921       0.072000   -9999.000000       0.066400       0.273000
53663     53663     shanxi         111.8167       38.9167           84       167     2012      04        02        093              0.134083      10.604797       0.463369       0.205334       0.076000       0.137300   -9999.000000       0.194000
53663     53663     shanxi         111.8167       38.9167           84       167     2012      04        03        094              0.130958       4.185577       0.000000       0.189561   -9999.000000   -9999.000000       0.051600       0.153000
53663     53663     shanxi         111.8167       38.9167           84       167     2012      04        04        095              0.134792       6.930206       0.029872       0.198471   -9999.000000       0.064900       0.058600       0.139000
53663     53663     shanxi         111.8167       38.9167           84       167     2012      04        05        096              0.133958       9.011932       0.000000       0.196880       0.060000   -9999.000000       0.049000       0.167000
53663     53663     shanxi         111.8167       38.9167           84       167     2012      04        06        097              0.133792       9.207123       0.504444       0.194331       0.067000   -9999.000000       0.049000       0.186000
53663     53663     shanxi         111.8167       38.9167           84       167     2012      04        07        098              0.132583      10.754913       0.000000       0.191256       0.063000       0.095000       0.059300       0.274000
53663     53663     shanxi         111.8167       38.9167           84       167     2012      04        08        099              0.131500      12.098816       0.000000       0.185959   -9999.000000   -9999.000000   -9999.000000       0.201000
53663     53663     shanxi         111.8167       38.9167           84       167     2012      04        09        100              0.130125      14.099426       0.135457       0.180322       0.071000       0.107000       0.053900   -9999.000000
53663     53663     shanxi         111.8167       38.9167           84       167     2012      04        10        101              0.128083      15.130432       0.812096       0.177774       0.069000   -9999.000000       0.061700       0.148000
53663     53663     shanxi         111.8167       38.9167           84       167     2012      04        11        102              0.126000      12.928223       0.141810       0.177785       0.056000   -9999.000000       0.065700       0.393000
53663     53663     shanxi         111.8167       38.9167           84       167     2012      04        12        103              0.132750       6.028961       1.101658       0.182895       0.073000       0.115400       0.063200       0.659000
53663     53663     shanxi         111.8167       38.9167           84       167     2012      04        13        104              0.134625      10.831726       0.000000       0.198299       0.065000   -9999.000000       0.060000       0.160000
53663     53663     shanxi         111.8167       38.9167           84       167     2012      04        14        105              0.133792      13.242279       0.000000       0.187498       0.065000       0.090900       0.051500   -9999.000000
53663     53663     shanxi         111.8167       38.9167           84       167     2012      04        15        106              0.131833      14.527405       0.000000       0.178371       0.059000   -9999.000000       0.047600       0.134000
53663     53663     shanxi         111.8167       38.9167           84       167     2012      04        16        107              0.129625      14.483185       0.000000       0.172174       0.055500   -9999.000000       0.059100       0.146000
53663     53663     shanxi         111.8167       38.9167           84       167     2012      04        17        108              0.127792      14.462250       0.000000       0.167947       0.057000       0.032000       0.051200       0.261000
53663     53663     shanxi         111.8167       38.9167           84       167     2012      04        18        109              0.126417      16.950958       2.590506       0.165217       0.058000   -9999.000000   -9999.000000       0.492000
53663     53663     shanxi         111.8167       38.9167           84       167     2012      04        19        110              0.125333      15.074921       0.000000       0.196261       0.065000   -9999.000000   -9999.000000   -9999.000000
53663     53663     shanxi         111.8167       38.9167           84       167     2012      04        20        111              0.123875      13.846130       0.483834       0.193898       0.073000   -9999.000000       0.061800       0.189000
53663     53663     shanxi         111.8167       38.9167           84       167     2012      04        21        112              0.123542      15.173004       0.000000       0.186953       0.057500   -9999.000000       0.061500       0.251000
53663     53663     shanxi         111.8167       38.9167           84       167     2012      04        22        113              0.122625      16.743469       0.000000       0.179371       0.057000       0.057800   -9999.000000       0.169000
53663     53663     shanxi         111.8167       38.9167           84       167     2012      04        23        114              0.135542      20.045898      32.788670       0.167889       0.060000   -9999.000000       0.050900       0.967000
53663     53663     shanxi         111.8167       38.9167           84       167     2012      04        24        115              0.178250      21.375641       0.106934       0.260673   -9999.000000   -9999.000000       0.099400   -9999.000000
53663     53663     shanxi         111.8167       38.9167           84       167     2012      04        25        116              0.000000      11.189056       0.000000       0.302398   -9999.000000       0.172800       0.073000       0.446000
53663     53663     shanxi         111.8167       38.9167           84       167     2012      04        26        117              0.154625       9.909790       0.000000       0.278717       0.063500   -9999.000000       0.057900       0.235000
53663     53663     shanxi         111.8167       38.9167           84       167     2012      04        27        118              0.148208      14.853027       0.000000       0.262237       0.058000       0.196500   -9999.000000       0.216000
53663     53663     shanxi         111.8167       38.9167           84       167     2012      04        28        119              0.144500      14.322906       0.000000       0.250629       0.061000   -9999.000000       0.050600       0.148000
53663     53663     shanxi         111.8167       38.9167           84       167     2012      04        29        120              0.142458      17.829803       0.000000       0.239171       0.067000   -9999.000000       0.058500       0.163000
53663     53663     shanxi         111.8167       38.9167           84       167     2012      04        30        121              0.140625      20.674622       9.625489       0.227761       0.082000       0.197000       0.064800       0.844000
53663     53663     shanxi         111.8167       38.9167           84       167     2012      05        01        122              0.143500      19.834839       3.348715       0.260051   -9999.000000   -9999.000000       0.088000       0.701000
53663     53663     shanxi         111.8167       38.9167           84       167     2012      05        02        123              0.149375      15.101837       0.000000       0.290061       0.060500       0.185100       0.069500       0.320000
53663     53663     shanxi         111.8167       38.9167           84       167     2012      05        03        124              0.145333      18.954437       0.000000       0.264918       0.061000       0.081000       0.069300       0.198000
53663     53663     shanxi         111.8167       38.9167           84       167     2012      05        04        125              0.142083      20.500488       0.000000       0.246927       0.057500   -9999.000000       0.053800       0.201000
53663     53663     shanxi         111.8167       38.9167           84       167     2012      05        05        126              0.138708      21.297516       0.000000       0.231010       0.058000       0.143200       0.056000       0.184000
53663     53663     shanxi         111.8167       38.9167           84       167     2012      05        06        127              0.135333      21.072113       0.000000       0.217201       0.057500   -9999.000000   -9999.000000       0.263000
53663     53663     shanxi         111.8167       38.9167           84       167     2012      05        07        128              0.132542      22.580322       2.268992       0.206102   -9999.000000   -9999.000000       0.060700       0.564000
53663     53663     shanxi         111.8167       38.9167           84       167     2012      05        08        129              0.131500      22.245636       1.587478       0.221816       0.057000       0.101900       0.069400   -9999.000000
53663     53663     shanxi         111.8167       38.9167           84       167     2012      05        09        130              0.155042      23.749786       3.508987       0.211614   -9999.000000   -9999.000000       0.056100       0.863000
53663     53663     shanxi         111.8167       38.9167           84       167     2012      05        10        131              0.164826      20.517914       3.426353       0.247299   -9999.000000   -9999.000000       0.056400       0.451000
53663     53663     shanxi         111.8167       38.9167           84       167     2012      05        11        132              0.161500      23.350830       1.007804       0.237424       0.113000   -9999.000000       0.092100       0.916000
53663     53663     shanxi         111.8167       38.9167           84       167     2012      05        12        133              0.154333      16.903473       0.000000       0.255993       0.071000   -9999.000000       0.063700       0.226000
53663     53663     shanxi         111.8167       38.9167           84       167     2012      05        13        134              0.146333      16.055573       0.000000       0.234114       0.066000       0.378800       0.052000   -9999.000000
53663     53663     shanxi         111.8167       38.9167           84       167     2012      05        14        135              0.142208      15.022308       0.424286       0.221758       0.066000       0.224800       0.073200       0.263000
53663     53663     shanxi         111.8167       38.9167           84       167     2012      05        15        136              0.139292      14.686340       0.000000       0.215694       0.069000       0.123300       0.058200       0.222000
53663     53663     shanxi         111.8167       38.9167           84       167     2012      05        16        137              0.136542      17.455231       0.000000       0.205545       0.063000   -9999.000000       0.064900       0.213000
53663     53663     shanxi         111.8167       38.9167           84       167     2012      05        17        138              0.134250      17.548615       0.000000       0.197103       0.060000   -9999.000000       0.061800       0.227000
53663     53663     shanxi         111.8167       38.9167           84       167     2012      05        18        139              0.131625      21.180573       0.031380       0.186574       0.056000       0.159800       0.066300   -9999.000000
53663     53663     shanxi         111.8167       38.9167           84       167     2012      05        19        140              0.130625      23.458649       0.000000       0.178892       0.064000   -9999.000000       0.065400       0.153000
53663     53663     shanxi         111.8167       38.9167           84       167     2012      05        20        141              0.126583      25.374634       0.876136       0.172991   -9999.000000   -9999.000000       0.066400       0.268000
53663     53663     shanxi         111.8167       38.9167           84       167     2012      05        21        142              0.121042      25.376465       2.794673       0.169905       0.101000   -9999.000000       0.102300       0.283000
53663     53663     shanxi         111.8167       38.9167           84       167     2012      05        22        143              0.122375      16.155640       0.000000       0.206103       0.069000   -9999.000000       0.070900       0.232000
53663     53663     shanxi         111.8167       38.9167           84       167     2012      05        23        144              0.121125      17.999481       0.103019       0.201888   -9999.000000       0.142100   -9999.000000   -9999.000000
53663     53663     shanxi         111.8167       38.9167           84       167     2012      05        24        145              0.121000      17.818420       0.000000       0.189617       0.064000   -9999.000000       0.070400       0.226000
53663     53663     shanxi         111.8167       38.9167           84       167     2012      05        25        146              0.000000      20.086243       0.033367       0.180174       0.070000       0.195000       0.076500       0.211000
53663     53663     shanxi         111.8167       38.9167           84       167     2012      05        26        147              0.118875      19.597931       0.000000       0.175323       0.060000       0.061700       0.059000       0.179000
53663     53663     shanxi         111.8167       38.9167           84       167     2012      05        27        148              0.116833      23.172272       0.000000       0.167554       0.060000   -9999.000000       0.060700       0.181000
53663     53663     shanxi         111.8167       38.9167           84       167     2012      05        28        149              0.124333      25.284119      11.274314       0.161870       0.066000   -9999.000000       0.065200       0.075000
53663     53663     shanxi         111.8167       38.9167           84       167     2012      05        29        150              0.165333      25.370056       1.066984       0.198395       0.072000   -9999.000000       0.094700       0.655000
53663     53663     shanxi         111.8167       38.9167           84       167     2012      05        30        151              0.151667      18.340851       0.406814       0.258342       0.068000   -9999.000000       0.072900   -9999.000000
53663     53663     shanxi         111.8167       38.9167           84       167     2012      05        31        152              0.185583      20.075592      14.033509       0.229349   -9999.000000       0.172700   -9999.000000   -9999.000000
53663     53663     shanxi         111.8167       38.9167           84       167     2012      06        01        153              0.186625      18.695496       6.273717       0.283395       0.116000   -9999.000000       0.096900       0.793000
53663     53663     shanxi         111.8167       38.9167           84       167     2012      06        02        154              0.170292      19.837402       0.511147       0.269691       0.103000       0.196900       0.085400       0.453000
53663     53663     shanxi         111.8167       38.9167           84       167     2012      06        03        155              0.173875      21.293579       6.561168       0.249802       0.132000   -9999.000000       0.121600       0.904000
53663     53663     shanxi         111.8167       38.9167           84       167     2012      06        04        156              0.167417      19.273499       0.000000       0.283374       0.084000       0.238900       0.100300       0.611000
53663     53663     shanxi         111.8167       38.9167           84       167     2012      06        05        157              0.159958      22.737793       0.751595       0.248991       0.090000       0.159000       0.113700       0.268000
53663     53663     shanxi         111.8167       38.9167           84       167     2012      06        06        158              0.151083      23.866577       2.807878       0.233830       0.101000   -9999.000000       0.116700   -9999.000000
53663     53663     shanxi         111.8167       38.9167           84       167     2012      06        07        159              0.149500      18.699432       0.246630       0.256695       0.107500       0.325800       0.101800       0.665000
53663     53663     shanxi         111.8167       38.9167           84       167     2012      06        08        160              0.150292      19.329376       0.000000       0.247965       0.086000   -9999.000000       0.088100       0.350000
53663     53663     shanxi         111.8167       38.9167           84       167     2012      06        09        161              0.145083      22.454620       3.558594       0.232004       0.076000   -9999.000000   -9999.000000       0.441000
53663     53663     shanxi         111.8167       38.9167           84       167     2012      06        10        162              0.141833      21.257782       0.000000       0.245018       0.080000       0.281400       0.085100       0.235000
53663     53663     shanxi         111.8167       38.9167           84       167     2012      06        11        163              0.000000      19.157745       0.000000       0.228726       0.074000   -9999.000000       0.093900   -9999.000000
53663     53663     shanxi         111.8167       38.9167           84       167     2012      06        12        164              0.135667      20.785706       0.000000       0.211725       0.074000       0.169400       0.084900       0.284000
53663     53663     shanxi         111.8167       38.9167           84       167     2012      06        13        165              0.131875      22.750458       0.000000       0.199508       0.070000       0.036900       0.080800       0.298000
53663     53663     shanxi         111.8167       38.9167           84       167     2012      06        14        166              0.129458      21.659393       0.000000       0.192198       0.078000   -9999.000000       0.086300       0.297000
53663     53663     shanxi         111.8167       38.9167           84       167     2012      06        15        167              0.128125      19.536285       1.862872       0.189208       0.076000       0.056200       0.097400       0.292000
53663     53663     shanxi         111.8167       38.9167           84       167     2012      06        16        168              0.128292      21.558411       0.000000       0.183672       0.068000   -9999.000000       0.083900   -9999.000000
53663     53663     shanxi         111.8167       38.9167           84       167     2012      06        17        169              0.126875      24.446930       0.000000       0.175393       0.074000   -9999.000000       0.093600       0.291000
53663     53663     shanxi         111.8167       38.9167           84       167     2012      06        18        170              0.124042      27.326874       1.534743       0.168405       0.062000       0.031400       0.077900       0.443000
53663     53663     shanxi         111.8167       38.9167           84       167     2012      06        19        171              0.124333      26.388367       0.367173       0.181665       0.081000       0.143600       0.087200       0.424000
53663     53663     shanxi         111.8167       38.9167           84       167     2012      06        20        172              0.130500      24.698425       0.909545       0.179396       0.073000       0.068800   -9999.000000       0.571000
53663     53663     shanxi         111.8167       38.9167           84       167     2012      06        21        173              0.128958      25.675476       2.503465       0.179453       0.107000   -9999.000000       0.095300   -9999.000000
53663     53663     shanxi         111.8167       38.9167           84       167     2012      06        22        174              0.131792      24.870605       1.255425       0.193176       0.110000   -9999.000000       0.104600       0.396000
53663     53663     shanxi         111.8167       38.9167           84       167     2012      06        23        175              0.133292      27.059052       6.703302       0.196965       0.104000       0.268500       0.112200       0.907000
53663     53663     shanxi         111.8167       38.9167           84       167     2012      06        24        176              0.146708      24.635315       1.919168       0.230241       0.106000   -9999.000000       0.082600       0.949000
53663     53663     shanxi         111.8167       38.9167           84       167     2012      06        25        177              0.144417      23.491791       5.347790       0.240131   -9999.000000       0.274700       0.124200       0.933000
53663     53663     shanxi         111.8167       38.9167           84       167     2012      06        26        178              0.139958      23.762878       3.658163       0.254620       0.105000   -9999.000000   -9999.000000       0.899000
53663     53663     shanxi         111.8167       38.9167           84       167     2012      06        27        179              0.135125      23.238831       6.526172       0.265087   -9999.000000   -9999.000000       0.149200       0.986000
53663     53663     shanxi         111.8167       38.9167           84       167     2012      06        28        180              0.181917      22.222412      10.180263       0.263462       0.168000       0.506400       0.129400       0.966000
53663     53663     shanxi         111.8167       38.9167           84       167     2012      06        29        181              0.206250      19.335907       0.311117       0.299710       0.122500       0.269900       0.132000       1.000000
53663     53663     shanxi         111.8167       38.9167           84       167     2012      06        30        182              0.184417      22.425049       0.000000       0.283367       0.092000   -9999.000000       0.111700   -9999.000000
53663     53663     shanxi         111.8167       38.9167           84       167     2012      07        01        183              0.172375      24.916656       0.000000       0.255751       0.094500       0.159300       0.099100       0.606000
53663     53663     shanxi         111.8167       38.9167           84       167     2012      07        02        184              0.162958      26.279449       0.175100       0.238495       0.104000   -9999.000000       0.103000       0.389000
53663     53663     shanxi         111.8167       38.9167           84       167     2012      07        03        185              0.155125      26.269012       0.420154       0.222142       0.102000       0.143200       0.115200       0.513000
53663     53663     shanxi         111.8167       38.9167           84       167     2012      07        04        186              0.177375      26.050537      11.326548       0.213703       0.103000   -9999.000000       0.127400       0.614000
53663     53663     shanxi         111.8167       38.9167           84       167     2012      07        05        187              0.193292      26.134613       1.089773       0.255186       0.096000   -9999.000000       0.098600   -9999.000000
53663     53663     shanxi         111.8167       38.9167           84       167     2012      07        06        188              0.172583      26.594940       0.614868       0.265296   -9999.000000       0.076300       0.101100       0.543000
53663     53663     shanxi         111.8167       38.9167           84       167     2012      07        07        189              0.159417      27.239807       0.065699       0.243621   -9999.000000   -9999.000000   -9999.000000       0.432000
53663     53663     shanxi         111.8167       38.9167           84       167     2012      07        08        190              0.165913      24.927582       6.005488       0.234213       0.117000       0.137200       0.126200       0.505000
53663     53663     shanxi         111.8167       38.9167           84       167     2012      07        09        191              0.168833      23.425995       4.020453       0.263271       0.115000   -9999.000000       0.129200       0.902000
53663     53663     shanxi         111.8167       38.9167           84       167     2012      07        10        192              0.158542      24.651154       2.188755       0.275527       0.103000   -9999.000000       0.116700   -9999.000000
53663     53663     shanxi         111.8167       38.9167           84       167     2012      07        11        193              0.147458      24.988373       0.000000       0.266531       0.099000       0.165000       0.104700       0.613000
53663     53663     shanxi         111.8167       38.9167           84       167     2012      07        12        194              0.136043      25.712219       0.000000       0.242115       0.099000   -9999.000000       0.104200       0.439000
53663     53663     shanxi         111.8167       38.9167           84       167     2012      07        13        195              0.125667      26.158173       4.939285       0.224765   -9999.000000       0.355900       0.119100       0.468000
53663     53663     shanxi         111.8167       38.9167           84       167     2012      07        14        196              0.120625      25.940247      12.151218       0.226463       0.114000   -9999.000000       0.129500       1.000000
53663     53663     shanxi         111.8167       38.9167           84       167     2012      07        15        197              0.118417      22.742096       0.363772       0.294754       0.101000   -9999.000000       0.127100   -9999.000000
53663     53663     shanxi         111.8167       38.9167           84       167     2012      07        16        198              0.115375      24.191986       0.158563       0.270645       0.092000   -9999.000000       0.112000       0.649000
53663     53663     shanxi         111.8167       38.9167           84       167     2012      07        17        199              0.107333      24.842316       0.260781       0.249917       0.091000       0.127300       0.117300       0.478000
53663     53663     shanxi         111.8167       38.9167           84       167     2012      07        18        200              0.100708      24.638580       0.117113       0.237258       0.101000       0.138500       0.112400       0.477000
53663     53663     shanxi         111.8167       38.9167           84       167     2012      07        19        201              0.095208      25.493011       0.179830       0.225662       0.086000       0.141400       0.108500       0.480000
53663     53663     shanxi         111.8167       38.9167           84       167     2012      07        20        202              0.091435      25.803070      12.445296       0.215307       0.078000       0.158500       0.105200   -9999.000000
53663     53663     shanxi         111.8167       38.9167           84       167     2012      07        21        203              0.240522      27.201447      61.480743       0.232509   -9999.000000       0.117100       0.141600       1.000000
53663     53663     shanxi         111.8167       38.9167           84       167     2012      07        22        204              0.204000      20.072388       1.030117       0.379589       0.180000   -9999.000000       0.157200       0.912000
53663     53663     shanxi         111.8167       38.9167           84       167     2012      07        23        205              0.188958      22.116211       0.170630       0.334334       0.147000   -9999.000000       0.156000       1.000000
53663     53663     shanxi         111.8167       38.9167           84       167     2012      07        24        206              0.182208      22.552368       1.419622       0.318505       0.149000       0.196400   -9999.000000       0.884000
53663     53663     shanxi         111.8167       38.9167           84       167     2012      07        25        207              0.204917      24.281128       7.719547       0.310869       0.180000   -9999.000000       0.161500       1.000000
53663     53663     shanxi         111.8167       38.9167           84       167     2012      07        26        208              0.225500      22.875916       3.681211       0.328809       0.155000       0.207300       0.144600       0.900000
53663     53663     shanxi         111.8167       38.9167           84       167     2012      07        27        209              0.235208      25.675018      18.259924       0.316270       0.202000   -9999.000000       0.155300       0.930000
53663     53663     shanxi         111.8167       38.9167           84       167     2012      07        28        210              0.230292      23.290222       7.237273       0.332016       0.167500       0.232100       0.156600       1.000000
53663     53663     shanxi         111.8167       38.9167           84       167     2012      07        29        211              0.206250      23.862885       0.359026       0.343079       0.149000       0.437900       0.145300       0.957000
53663     53663     shanxi         111.8167       38.9167           84       167     2012      07        30        212              0.247625      24.944489      22.978123       0.321331   -9999.000000   -9999.000000       0.184600       1.000000
53663     53663     shanxi         111.8167       38.9167           84       167     2012      07        31        213              0.226958      20.858124       0.264848       0.356260       0.167000   -9999.000000       0.169100       1.000000
53663     53663     shanxi         111.8167       38.9167           84       167     2012      08        01        214              0.208625      22.339691       0.425409       0.335693       0.211000   -9999.000000       0.180600       1.000000
53663     53663     shanxi         111.8167       38.9167           84       167     2012      08        02        215              0.194042      24.289520       0.000000       0.321673       0.184000   -9999.000000       0.150700       0.843000
53663     53663     shanxi         111.8167       38.9167           84       167     2012      08        03        216              0.181208      25.440796       5.013307       0.309752       0.173000       0.211800       0.149200   -9999.000000
53663     53663     shanxi         111.8167       38.9167           84       167     2012      08        04        217              0.170917      25.715179       0.386853       0.300155       0.148000       0.193200       0.136300       0.763000
53663     53663     shanxi         111.8167       38.9167           84       167     2012      08        05        218              0.162667      25.708771       0.238283       0.291034       0.141500       0.094500       0.149500       0.618000
53663     53663     shanxi         111.8167       38.9167           84       167     2012      08        06        219              0.160083      25.706238       4.872915       0.284002       0.155000       0.026800       0.155600       0.727000
53663     53663     shanxi         111.8167       38.9167           84       167     2012      08        07        220              0.163667      24.815308       2.631432       0.298465       0.145000   -9999.000000       0.136500       0.747000
53663     53663     shanxi         111.8167       38.9167           84       167     2012      08        08        221              0.204667      25.934296       0.478448       0.294850       0.156000       0.168200       0.149500   -9999.000000
53663     53663     shanxi         111.8167       38.9167           84       167     2012      08        09        222              0.183292      23.525665       0.181770       0.289628       0.144000   -9999.000000       0.149100       0.691000
53663     53663     shanxi         111.8167       38.9167           84       167     2012      08        10        223              0.169708      24.418549       0.743525       0.275482       0.135500   -9999.000000   -9999.000000       0.619000
53663     53663     shanxi         111.8167       38.9167           84       167     2012      08        11        224              0.188208      24.379120       8.573276       0.269366       0.189000       0.129500       0.170700       0.652000
53663     53663     shanxi         111.8167       38.9167           84       167     2012      08        12        225              0.189417      20.523773       0.000000       0.304890       0.159000       0.373900       0.172400       0.769000
53663     53663     shanxi         111.8167       38.9167           84       167     2012      08        13        226              0.176833      22.685883       2.890370       0.289599       0.161000       0.186300       0.152800   -9999.000000
53663     53663     shanxi         111.8167       38.9167           84       167     2012      08        14        227              0.195375      23.555481       2.587413       0.285563       0.186000   -9999.000000       0.172400       0.988000
53663     53663     shanxi         111.8167       38.9167           84       167     2012      08        15        228              0.180375      21.745880       0.000000       0.296964       0.156000   -9999.000000       0.163500       0.668000
53663     53663     shanxi         111.8167       38.9167           84       167     2012      08        16        229              0.168625      22.672333       0.115152       0.279385       0.143000       0.249800       0.171900       0.769000
53663     53663     shanxi         111.8167       38.9167           84       167     2012      08        17        230              0.185375      24.442841       2.884725       0.269472   -9999.000000   -9999.000000       0.162400       0.794000
53663     53663     shanxi         111.8167       38.9167           84       167     2012      08        18        231              0.183417      21.900513       3.150306       0.282369       0.200000   -9999.000000       0.183200   -9999.000000
53663     53663     shanxi         111.8167       38.9167           84       167     2012      08        19        232              0.173333      21.314545       1.222232       0.291989       0.157000   -9999.000000       0.151400       0.739000
53663     53663     shanxi         111.8167       38.9167           84       167     2012      08        20        233              0.163958      23.191193       0.645885       0.273972       0.140000   -9999.000000       0.171100       0.703000
53663     53663     shanxi         111.8167       38.9167           84       167     2012      08        21        234              0.155583      21.533081       0.000000       0.270390       0.139000       0.242800   -9999.000000       0.778000
53663     53663     shanxi         111.8167       38.9167           84       167     2012      08        22        235              0.152292      18.443634       0.000000       0.258807       0.133500       0.318100       0.155600   -9999.000000
53663     53663     shanxi         111.8167       38.9167           84       167     2012      08        23        236              0.151125      19.442413       0.000000       0.251464       0.150000       0.135400       0.149400       0.442000
53663     53663     shanxi         111.8167       38.9167           84       167     2012      08        24        237              0.153375      20.775665       0.000000       0.244580       0.141000       0.194600       0.160800       0.569000
53663     53663     shanxi         111.8167       38.9167           84       167     2012      08        25        238              0.000000      21.800201       1.678342       0.237064       0.175000   -9999.000000       0.134300       0.559000
53663     53663     shanxi         111.8167       38.9167           84       167     2012      08        26        239              0.213083      22.744873       1.446287       0.242919       0.141500       0.149300       0.145700       0.833000
53663     53663     shanxi         111.8167       38.9167           84       167     2012      08        27        240              0.213833      22.512329       0.419144       0.246882       0.168000       0.269700   -9999.000000       0.664000
53663     53663     shanxi         111.8167       38.9167           84       167     2012      08        28        241              0.197208      21.935150       0.645108       0.241951       0.147000   -9999.000000       0.139800       0.746000
53663     53663     shanxi         111.8167       38.9167           84       167     2012      08        29        242              0.185000      22.977997       0.000000       0.231783       0.134000       0.303200       0.152900       0.579000
53663     53663     shanxi         111.8167       38.9167           84       167     2012      08        30        243              0.174500      23.602264       0.000000       0.221606       0.146000   -9999.000000       0.131200       0.650000
53663     53663     shanxi         111.8167       38.9167           84       167     2012      08        31        244              0.166708      23.237366       0.925184       0.214203       0.150000       0.062300       0.138800       0.645000
53663     53663     shanxi         111.8167       38.9167           84       167     2012      09        01        245              0.237083      21.718689      22.108767       0.218170       0.161000   -9999.000000       0.163800   -9999.000000
53663     53663     shanxi         111.8167       38.9167           84       167     2012      09        02        246              0.222625      16.981720       0.260375       0.321532       0.186000   -9999.000000       0.173400       1.000000
53663     53663     shanxi         111.8167       38.9167           84       167     2012      09        03        247              0.204917      17.403076       1.026284       0.293792       0.164000       0.264000       0.153800       0.810000
53663     53663     shanxi         111.8167       38.9167           84       167     2012      09        04        248              0.193458      15.864594       0.112202       0.285214   -9999.000000       0.243800       0.155700       0.850000
53663     53663     shanxi         111.8167       38.9167           84       167     2012      09        05        249              0.185208      16.630188       0.000000       0.273554       0.134000       0.412900       0.131100       0.790000
53663     53663     shanxi         111.8167       38.9167           84       167     2012      09        06        250              0.186958      19.480682       5.128239       0.265148       0.144000   -9999.000000       0.149300   -9999.000000
53663     53663     shanxi         111.8167       38.9167           84       167     2012      09        07        251              0.186958      17.518707       0.330672       0.286183       0.137000       0.171000   -9999.000000       0.773000
53663     53663     shanxi         111.8167       38.9167           84       167     2012      09        08        252              0.179083      18.836365       0.000000       0.276060       0.128000       0.279400       0.132600       0.634000
53663     53663     shanxi         111.8167       38.9167           84       167     2012      09        09        253              0.172417      19.594818       0.000000       0.264955       0.131000       0.144800       0.143000       0.667000
53663     53663     shanxi         111.8167       38.9167           84       167     2012      09        10        254              0.165375      20.540253       1.107099       0.255008       0.147000       0.222900       0.110200       0.807000
53663     53663     shanxi         111.8167       38.9167           84       167     2012      09        11        255              0.165042      17.402069       0.128883       0.260412       0.120000       0.050100       0.097600   -9999.000000
53663     53663     shanxi         111.8167       38.9167           84       167     2012      09        12        256              0.159917      16.450409       0.686581       0.257338       0.104000   -9999.000000       0.102300       0.561000
53663     53663     shanxi         111.8167       38.9167           84       167     2012      09        13        257              0.159083      12.187531       1.078598       0.253413   -9999.000000       0.377800       0.115800       0.731000
53663     53663     shanxi         111.8167       38.9167           84       167     2012      09        14        258              0.161083      13.136230       0.000000       0.257914       0.125000   -9999.000000       0.098100       0.763000
53663     53663     shanxi         111.8167       38.9167           84       167     2012      09        15        259              0.161958      14.900604       0.400119       0.251800       0.129000   -9999.000000       0.105900       0.404000
53663     53663     shanxi         111.8167       38.9167           84       167     2012      09        16        260              0.160333      15.940521       0.089096       0.246656       0.115000       0.189000       0.095600   -9999.000000
53663     53663     shanxi         111.8167       38.9167           84       167     2012      09        17        261              0.160375      16.012756       0.795283       0.244686       0.117500   -9999.000000       0.106600       0.581000
53663     53663     shanxi         111.8167       38.9167           84       167     2012      09        18        262              0.158333      16.740906       0.063091       0.241059       0.117000       0.069300       0.109400       0.431000
53663     53663     shanxi         111.8167       38.9167           84       167     2012      09        19        263              0.159417      16.589661       0.000000       0.238152       0.121000   -9999.000000       0.103500       0.478000
53663     53663     shanxi         111.8167       38.9167           84       167     2012      09        20        264              0.157667      17.569427       3.421664       0.232165       0.119000   -9999.000000       0.110100       0.513000
53663     53663     shanxi         111.8167       38.9167           84       167     2012      09        21        265              0.191042      17.987366       3.768073       0.238940   -9999.000000       0.287000       0.123200       0.897000
53663     53663     shanxi         111.8167       38.9167           84       167     2012      09        22        266              0.189875      13.987427       0.000000       0.280918       0.119000       0.171400       0.118100       0.735000
53663     53663     shanxi         111.8167       38.9167           84       167     2012      09        23        267              0.181167      16.851868       0.259781       0.261499       0.106500       0.255100       0.116200       0.719000
53663     53663     shanxi         111.8167       38.9167           84       167     2012      09        24        268              0.173833      17.924408       6.734340       0.253687       0.115000   -9999.000000   -9999.000000       0.893000
53663     53663     shanxi         111.8167       38.9167           84       167     2012      09        25        269              0.211708      17.929230       8.394220       0.264853   -9999.000000   -9999.000000       0.134400       0.850000
53663     53663     shanxi         111.8167       38.9167           84       167     2012      09        26        270              0.205917      11.857147       0.000000       0.310779       0.138000       0.260100       0.136700       0.949000
53663     53663     shanxi         111.8167       38.9167           84       167     2012      09        27        271              0.196143      15.613556       0.000000       0.284821   -9999.000000   -9999.000000       0.123400       0.741000
53663     53663     shanxi         111.8167       38.9167           84       167     2012      09        28        272              0.180467      11.855438       0.145788       0.274483       0.110000   -9999.000000       0.120600       0.760000
53663     53663     shanxi         111.8167       38.9167           84       167     2012      09        29        273              0.176375      10.741669       0.509934       0.270188       0.118000   -9999.000000       0.129500       0.527000
53663     53663     shanxi         111.8167       38.9167           84       167     2012      09        30        274              0.172000      11.390381       0.324546       0.266588       0.116000       0.124800       0.129400   -9999.000000
53663     53663     shanxi         111.8167       38.9167           84       167     2012      10        01        275              0.169125      12.024353       0.088788       0.263406       0.100000   -9999.000000       0.091900       0.504000
53663     53663     shanxi         111.8167       38.9167           84       167     2012      10        02        276              0.165542      13.594421       0.000000       0.258129       0.099000       0.167200       0.098900       0.481000
53663     53663     shanxi         111.8167       38.9167           84       167     2012      10        03        277              0.161792      14.579102       0.000000       0.253735       0.093000       0.235800       0.085200       0.562000
53663     53663     shanxi         111.8167       38.9167           84       167     2012      10        04        278              0.158000      14.248291       1.009533       0.249155       0.129000       0.055700       0.105300       0.624000
53663     53663     shanxi         111.8167       38.9167           84       167     2012      10        05        279              0.159083      10.212036       0.353474       0.259822       0.114000       0.229500   -9999.000000   -9999.000000
53663     53663     shanxi         111.8167       38.9167           84       167     2012      10        06        280              0.159625      10.224396       0.000000       0.259214       0.111000       0.096800       0.093400       0.591000
53663     53663     shanxi         111.8167       38.9167           84       167     2012      10        07        281              0.158000      12.823456       0.000000       0.252937       0.111000   -9999.000000       0.091800       0.490000
53663     53663     shanxi         111.8167       38.9167           84       167     2012      10        08        282              0.157667      13.167725       1.398057       0.250886       0.112000   -9999.000000       0.092100       0.506000
53663     53663     shanxi         111.8167       38.9167           84       167     2012      10        09        283              0.158417      13.557190       0.000000       0.255853       0.099000       0.126400       0.080400       0.399000
53663     53663     shanxi         111.8167       38.9167           84       167     2012      10        10        284              0.156917       9.714752       0.962417       0.252174       0.108000   -9999.000000       0.089800   -9999.000000
53663     53663     shanxi         111.8167       38.9167           84       167     2012      10        11        285              0.155542      10.477905       0.000000       0.254608       0.087000       0.020500   -9999.000000       0.418000
53663     53663     shanxi         111.8167       38.9167           84       167     2012      10        12        286              0.153667      11.897125       0.000000       0.247479       0.087000   -9999.000000       0.077800       0.365000
53663     53663     shanxi         111.8167       38.9167           84       167     2012      10        13        287              0.151500      11.782196       0.000000       0.242467       0.091000   -9999.000000       0.088200       0.387000
53663     53663     shanxi         111.8167       38.9167           84       167     2012      10        14        288              0.150792      11.427216       0.000000       0.239795       0.091000       0.170100       0.075500       0.332000
53663     53663     shanxi         111.8167       38.9167           84       167     2012      10        15        289              0.154250      12.909729      14.937702       0.239273       0.076000       0.391100       0.081100   -9999.000000
53663     53663     shanxi         111.8167       38.9167           84       167     2012      10        16        290              0.199833      11.250977       0.243736       0.277172       0.130000       0.203300       0.127300       0.919000
53663     53663     shanxi         111.8167       38.9167           84       167     2012      10        17        291              0.184542       5.679688       2.093907       0.285652       0.115000   -9999.000000       0.101300       0.612000
53663     53663     shanxi         111.8167       38.9167           84       167     2012      10        18        292              0.178000       5.382599       0.374583       0.285782   -9999.000000   -9999.000000       0.085000       0.868000
53663     53663     shanxi         111.8167       38.9167           84       167     2012      10        19        293              0.174292       6.026001       0.413038       0.279322       0.102000       0.236600       0.098700       0.497000
53663     53663     shanxi         111.8167       38.9167           84       167     2012      10        20        294              0.171750       8.345032       0.608061       0.277531       0.096500   -9999.000000       0.085000       0.562000
53663     53663     shanxi         111.8167       38.9167           84       167     2012      10        21        295              0.197875      11.374084      14.458256       0.276576   -9999.000000       0.246100       0.093900       0.827000
53663     53663     shanxi         111.8167       38.9167           84       167     2012      10        22        296              0.200208       4.520386       0.967973       0.323639   -9999.000000       0.192000   -9999.000000       0.682000
53663     53663     shanxi         111.8167       38.9167           84       167     2012      10        23        297              0.192667       5.858643       0.746613       0.304264   -9999.000000   -9999.000000       0.084300       0.771000
53663     53663     shanxi         111.8167       38.9167           84       167     2012      10        24        298              0.185333       6.625610       0.112912       0.297971   -9999.000000   -9999.000000       0.090300       0.525000
53663     53663     shanxi         111.8167       38.9167           84       167     2012      10        25        299              0.000000       7.518250       0.000000       0.291368       0.091000   -9999.000000       0.080700       0.609000
53663     53663     shanxi         111.8167       38.9167           84       167     2012      10        26        300              0.176167       8.676361       0.381670       0.287422       0.110000   -9999.000000       0.082600       0.549000
53663     53663     shanxi         111.8167       38.9167           84       167     2012      10        27        301              0.173708       6.735016       0.000000       0.287710       0.102000   -9999.000000       0.091600       0.594000
53663     53663     shanxi         111.8167       38.9167           84       167     2012      10        28        302              0.000000       6.671417       0.000000       0.284098       0.095000   -9999.000000   -9999.000000       0.678000
53663     53663     shanxi         111.8167       38.9167           84       167     2012      10        29        303              0.168208       9.199402       1.526542       0.281914   -9999.000000       0.129800       0.063500   -9999.000000
53663     53663     shanxi         111.8167       38.9167           84       167     2012      10        30        304              0.163875       5.164093       0.137238       0.256895       0.087000   -9999.000000       0.073400       0.307000
53663     53663     shanxi         111.8167       38.9167           84       167     2012      10        31        305              0.161792       3.017822       1.051749       0.246048       0.086000   -9999.000000       0.065700       0.305000
53663     53663     shanxi         111.8167       38.9167           84       167     2012      11        01        306              0.161542       3.727386       0.000000       0.250473       0.086000       0.171700       0.076400       0.406000
53663     53663     shanxi         111.8167       38.9167           84       167     2012      11        02        307              0.161833       4.692413       0.941678       0.263409       0.082000   -9999.000000       0.074100       0.409000
53663     53663     shanxi         111.8167       38.9167           84       167     2012      11        03        308              0.162375       7.675140       0.585792       0.272358   -9999.000000   -9999.000000       0.063100   -9999.000000
53663     53663     shanxi         111.8167       38.9167           84       167     2012      11        04        309              0.165917      -1.541351       0.519362       0.197396   -9999.000000   -9999.000000       0.054000       0.502000
53663     53663     shanxi         111.8167       38.9167           84       167     2012      11        05        310              0.172458      -3.477295       1.569299       0.141676       0.095000       0.070400       0.044800       0.457000
53663     53663     shanxi         111.8167       38.9167           84       167     2012      11        06        311              0.185500      -1.552948       0.351208       0.175377       0.103000       0.070300       0.060300       0.547000
53663     53663     shanxi         111.8167       38.9167           84       167     2012      11        07        312              0.182583       0.423218       0.000000       0.202680   -9999.000000       0.149400       0.058100       0.451000
53663     53663     shanxi         111.8167       38.9167           84       167     2012      11        08        313              0.185750       0.307587       0.000000       0.204051   -9999.000000       0.047300   -9999.000000   -9999.000000
53663     53663     shanxi         111.8167       38.9167           84       167     2012      11        09        314              0.196000       1.849548       0.144544       0.230737   -9999.000000   -9999.000000       0.058100       0.728000
53663     53663     shanxi         111.8167       38.9167           84       167     2012      11        10        315              0.195708       2.729279       2.078545       0.259299   -9999.000000       0.161200       0.045800       0.449000
53663     53663     shanxi         111.8167       38.9167           84       167     2012      11        11        316              0.172292      -2.144501       0.148029       0.183721   -9999.000000       0.065400       0.045000       0.402000
53663     53663     shanxi         111.8167       38.9167           84       167     2012      11        12        317              0.145375      -3.798370       0.000000       0.144709   -9999.000000   -9999.000000       0.044800       0.321000
53663     53663     shanxi         111.8167       38.9167           84       167     2012      11        13        318              0.000000      -2.941559       0.000000       0.157983   -9999.000000   -9999.000000       0.043000   -9999.000000
53663     53663     shanxi         111.8167       38.9167           84       167     2012      11        14        319              0.109042      -3.190369       0.000000       0.152795   -9999.000000       0.066600       0.048700       0.473000
53663     53663     shanxi         111.8167       38.9167           84       167     2012      11        15        320              0.113167      -0.480347       0.000000       0.185358   -9999.000000   -9999.000000       0.046100       0.306000
53663     53663     shanxi         111.8167       38.9167           84       167     2012      11        16        321              0.120417      -1.134460       0.000000       0.176417   -9999.000000       0.062200       0.042400       0.429000
53663     53663     shanxi         111.8167       38.9167           84       167     2012      11        17        322              0.000000      -2.997772       0.000000       0.154056       0.103000   -9999.000000       0.056900       0.383000
53663     53663     shanxi         111.8167       38.9167           84       167     2012      11        18        323              0.100833      -0.371826       0.000000       0.186930   -9999.000000       0.191600       0.050400       0.531000
53663     53663     shanxi         111.8167       38.9167           84       167     2012      11        19        324              0.092167      -1.045929       0.000000       0.184928   -9999.000000       0.037700       0.047400       0.360000
53663     53663     shanxi         111.8167       38.9167           84       167     2012      11        20        325              0.096333      -0.737000       0.000000       0.183302   -9999.000000   -9999.000000       0.051500       0.391000
53663     53663     shanxi         111.8167       38.9167           84       167     2012      11        21        326              0.160708       0.752014       0.000000       0.203081       0.099000   -9999.000000       0.047000       0.573000
53663     53663     shanxi         111.8167       38.9167           84       167     2012      11        22        327              0.164542       1.443329       0.000000       0.221058   -9999.000000   -9999.000000       0.031800       0.410000
53663     53663     shanxi         111.8167       38.9167           84       167     2012      11        23        328              0.097250      -2.107483       0.000000       0.164792   -9999.000000       0.147400       0.041400       0.357000
53663     53663     shanxi         111.8167       38.9167           84       167     2012      11        24        329              0.089083      -3.652130       0.000000       0.146820   -9999.000000       0.059500       0.044400       0.272000
53663     53663     shanxi         111.8167       38.9167           84       167     2012      11        25        330              0.085208      -1.107758       0.000000       0.174811   -9999.000000       0.146600   -9999.000000       0.410000
53663     53663     shanxi         111.8167       38.9167           84       167     2012      11        26        331              0.081333      -3.222565       0.000000       0.152817   -9999.000000       0.052100   -9999.000000       0.407000
53663     53663     shanxi         111.8167       38.9167           84       167     2012      11        27        332              0.081583      -3.025665       0.000000       0.149319   -9999.000000   -9999.000000       0.041400   -9999.000000
53663     53663     shanxi         111.8167       38.9167           84       167     2012      11        28        333              0.078292      -2.717255       0.000000       0.164617   -9999.000000       0.138700       0.041700       0.254000
53663     53663     shanxi         111.8167       38.9167           84       167     2012      11        29        334              0.078083      -6.142548       0.000000       0.130671   -9999.000000       0.032400       0.043200       0.227000
53663     53663     shanxi         111.8167       38.9167           84       167     2012      11        30        335              0.079083      -5.107422       0.000000       0.138456   -9999.000000   -9999.000000       0.042900       0.248000
53663     53663     shanxi         111.8167       38.9167           84       167     2012      12        01        336              0.079708      -2.921173       0.000000       0.151282   -9999.000000   -9999.000000       0.043000       0.265000
53663     53663     shanxi         111.8167       38.9167           84       167     2012      12        02        337              0.078542      -3.016479       0.000000       0.151093   -9999.000000       0.078300       0.040000   -9999.000000
53663     53663     shanxi         111.8167       38.9167           84       167     2012      12        03        338              0.076417      -3.437012       0.000000       0.150899   -9999.000000       0.143800       0.043500       0.146000
53663     53663     shanxi         111.8167       38.9167           84       167     2012      12        04        339              0.077708      -6.095001       0.000000       0.126511   -9999.000000       0.078600       0.042600       0.116000
53663     53663     shanxi         111.8167       38.9167           84       167     2012      12        05        340              0.076458      -5.116852       0.000000       0.133449   -9999.000000   -9999.000000       0.040400       0.152000
53663     53663     shanxi         111.8167       38.9167           84       167     2012      12        06        341              0.076625      -8.718536       0.000000       0.120721   -9999.000000   -9999.000000   -9999.000000       0.147000
53663     53663     shanxi         111.8167       38.9167           84       167     2012      12        07        342              0.076958      -7.528076       0.000000       0.120065   -9999.000000       0.028000       0.040700   -9999.000000
53663     53663     shanxi         111.8167       38.9167           84       167     2012      12        08        343              0.075250     -10.942841       0.000000       0.116892   -9999.000000   -9999.000000       0.040200       0.158000
53663     53663     shanxi         111.8167       38.9167           84       167     2012      12        09        344              0.075208     -14.017548       0.000000       0.111554   -9999.000000   -9999.000000       0.035900       0.152000
53663     53663     shanxi         111.8167       38.9167           84       167     2012      12        10        345              0.075750      -9.038330       0.000000       0.112782   -9999.000000   -9999.000000       0.034300       0.187000
53663     53663     shanxi         111.8167       38.9167           84       167     2012      12        11        346              0.075417      -7.885040       0.000000       0.117063   -9999.000000       0.156400       0.033100       0.141000
53663     53663     shanxi         111.8167       38.9167           84       167     2012      12        12        347              0.075958      -5.414581       0.000000       0.127177   -9999.000000       0.050000   -9999.000000   -9999.000000
53663     53663     shanxi         111.8167       38.9167           84       167     2012      12        13        348              0.077458      -3.787842       0.000000       0.146833   -9999.000000   -9999.000000       0.038100       0.104000
53663     53663     shanxi         111.8167       38.9167           84       167     2012      12        14        349              0.079458      -3.060150       0.000000       0.142519   -9999.000000   -9999.000000       0.033100       0.097000
53663     53663     shanxi         111.8167       38.9167           84       167     2012      12        15        350              0.000000      -2.861755       0.000000       0.150209   -9999.000000       0.004400       0.038000       0.213000
53663     53663     shanxi         111.8167       38.9167           84       167     2012      12        16        351              0.080750      -1.428650       0.000000       0.169360   -9999.000000   -9999.000000       0.038500       0.170000
53663     53663     shanxi         111.8167       38.9167           84       167     2012      12        17        352              0.077708      -2.752563       0.000000       0.155571   -9999.000000       0.071900       0.031900       0.210000
53663     53663     shanxi         111.8167       38.9167           84       167     2012      12        18        353              0.075750      -8.323761       0.000000       0.121815   -9999.000000   -9999.000000       0.041900       0.158000
53663     53663     shanxi         111.8167       38.9167           84       167     2012      12        19        354              0.076125      -6.960236       0.000000       0.118320   -9999.000000   -9999.000000       0.039600       0.116000
53663     53663     shanxi         111.8167       38.9167           84       167     2012      12        20        355              0.000000      -5.009094       0.000000       0.130098   -9999.000000       0.137000       0.035500       0.124000
53663     53663     shanxi         111.8167       38.9167           84       167     2012      12        21        356              0.077917      -5.368500       0.000000       0.124091   -9999.000000       0.174500       0.032100       0.185000
53663     53663     shanxi         111.8167       38.9167           84       167     2012      12        22        357              0.075458      -9.195343       0.000000       0.119772   -9999.000000   -9999.000000       0.029900       0.064000
53663     53663     shanxi         111.8167       38.9167           84       167     2012      12        23        358              0.073958     -14.795837       0.000000       0.113852   -9999.000000   -9999.000000   -9999.000000       0.134000
53663     53663     shanxi         111.8167       38.9167           84       167     2012      12        24        359              0.073222     -16.261536       0.000000       0.110340   -9999.000000   -9999.000000       0.030700       0.142000
53663     53663     shanxi         111.8167       38.9167           84       167     2012      12        25        360              0.073625     -14.310486       0.000000       0.110450   -9999.000000   -9999.000000       0.029100       0.232000
53663     53663     shanxi         111.8167       38.9167           84       167     2012      12        26        361              0.000000     -12.168762       0.000000       0.111096   -9999.000000   -9999.000000       0.031100   -9999.000000
53663     53663     shanxi         111.8167       38.9167           84       167     2012      12        27        362              0.074600      -9.199310       0.000000       0.112789   -9999.000000   -9999.000000       0.032500       0.149000
53663     53663     shanxi         111.8167       38.9167           84       167     2012      12        28        363              0.000000      -7.266327       0.000000       0.117804   -9999.000000   -9999.000000       0.027800       0.123000
53663     53663     shanxi         111.8167       38.9167           84       167     2012      12        29        364              0.000000      -9.910095       0.000000       0.113713   -9999.000000   -9999.000000       0.028900       0.063000
53663     53663     shanxi         111.8167       38.9167           84       167     2012      12        30        365              0.000000     -14.255096       0.000000       0.111733   -9999.000000   -9999.000000       0.027100       0.066000
53663     53663     shanxi         111.8167       38.9167           84       167     2012      12        31        366              0.073800     -12.148163       0.000000       0.111820   -9999.000000   -9999.000000       0.027000   -9999.000000
