# Supplementary material for: Research on Fusing Multisatellite Soil Moisture Data Based on Bayesian Model Averaging
Source: Hindawi journal article supplement (doi:10.1155/2018/9310838), 2018-06-25
Supplement: f1 [file 9310838.f1.zip › 2012_sm00-10cm_daily_ZDB_ZHY_53665_366days_allin.txt]

53665     53665     shanxi         111.6333       38.2667           87       167     2012      01        01        001              0.000000   -9999.000000       0.000000   -9999.000000   -9999.000000   -9999.000000       0.026200   -9999.000000
53665     53665     shanxi         111.6333       38.2667           87       167     2012      01        02        002              0.110875      -5.878937       0.000000       0.125986   -9999.000000   -9999.000000       0.023200       0.047000
53665     53665     shanxi         111.6333       38.2667           87       167     2012      01        03        003              0.000000      -9.153564       0.000000       0.117231   -9999.000000   -9999.000000   -9999.000000       0.089000
53665     53665     shanxi         111.6333       38.2667           87       167     2012      01        04        004              0.108667     -11.783051       0.000000       0.114061   -9999.000000   -9999.000000       0.026700   -9999.000000
53665     53665     shanxi         111.6333       38.2667           87       167     2012      01        05        005              0.108500     -11.136078       0.000000       0.112853   -9999.000000   -9999.000000       0.022500       0.042000
53665     53665     shanxi         111.6333       38.2667           87       167     2012      01        06        006              0.108583      -9.768219       0.000000       0.113781   -9999.000000   -9999.000000       0.031800       0.020000
53665     53665     shanxi         111.6333       38.2667           87       167     2012      01        07        007              0.109625      -8.296478       0.000000       0.115942   -9999.000000   -9999.000000       0.026500       0.065000
53665     53665     shanxi         111.6333       38.2667           87       167     2012      01        08        008              0.000000      -6.649963       0.000000       0.119012   -9999.000000   -9999.000000       0.026700       0.021000
53665     53665     shanxi         111.6333       38.2667           87       167     2012      01        09        009              0.109250      -7.077698       0.000000       0.125001   -9999.000000   -9999.000000   -9999.000000       0.028000
53665     53665     shanxi         111.6333       38.2667           87       167     2012      01        10        010              0.108958      -7.783051       0.000000       0.122662   -9999.000000   -9999.000000       0.028800       0.036000
53665     53665     shanxi         111.6333       38.2667           87       167     2012      01        11        011              0.108583      -8.745575       0.000000       0.118883   -9999.000000   -9999.000000       0.023600       0.032000
53665     53665     shanxi         111.6333       38.2667           87       167     2012      01        12        012              0.108583      -9.166595       0.000000       0.116897   -9999.000000   -9999.000000       0.030600       0.053000
53665     53665     shanxi         111.6333       38.2667           87       167     2012      01        13        013              0.108750      -8.084473       0.000000       0.122346   -9999.000000   -9999.000000       0.025000   -9999.000000
53665     53665     shanxi         111.6333       38.2667           87       167     2012      01        14        014              0.108750      -7.437012       0.000000       0.122264   -9999.000000   -9999.000000   -9999.000000       0.074000
53665     53665     shanxi         111.6333       38.2667           87       167     2012      01        15        015              0.108750      -7.262512       0.000000       0.121829   -9999.000000   -9999.000000       0.029300       0.047000
53665     53665     shanxi         111.6333       38.2667           87       167     2012      01        16        016              0.108667      -6.541779       0.000000       0.128742   -9999.000000   -9999.000000       0.021900       0.018000
53665     53665     shanxi         111.6333       38.2667           87       167     2012      01        17        017              0.000000      -7.265808       0.000000       0.122151   -9999.000000   -9999.000000       0.028200       0.111000
53665     53665     shanxi         111.6333       38.2667           87       167     2012      01        18        018              0.109000      -6.489594       0.000000       0.130328   -9999.000000   -9999.000000       0.028700   -9999.000000
53665     53665     shanxi         111.6333       38.2667           87       167     2012      01        19        019              0.109792      -6.201538       0.000000       0.131009   -9999.000000   -9999.000000       0.027800       0.055000
53665     53665     shanxi         111.6333       38.2667           87       167     2012      01        20        020              0.110792      -4.393707       0.000000       0.139723   -9999.000000   -9999.000000   -9999.000000       0.021000
53665     53665     shanxi         111.6333       38.2667           87       167     2012      01        21        021              0.110667      -6.964355       0.000000       0.125243   -9999.000000   -9999.000000       0.021500       0.022000
53665     53665     shanxi         111.6333       38.2667           87       167     2012      01        22        022              0.109250     -11.938995       0.000000       0.115382   -9999.000000   -9999.000000       0.015900       0.079000
53665     53665     shanxi         111.6333       38.2667           87       167     2012      01        23        023              0.108333     -14.233948       0.000000       0.110599   -9999.000000   -9999.000000       0.025800   -9999.000000
53665     53665     shanxi         111.6333       38.2667           87       167     2012      01        24        024              0.108000     -13.680664       0.000000       0.110160   -9999.000000   -9999.000000   -9999.000000       0.033000
53665     53665     shanxi         111.6333       38.2667           87       167     2012      01        25        025              0.108083     -12.562134       0.000000       0.110898   -9999.000000   -9999.000000       0.024200       0.032000
53665     53665     shanxi         111.6333       38.2667           87       167     2012      01        26        026              0.108250     -10.966187       0.000000       0.111497   -9999.000000   -9999.000000       0.029400       0.031000
53665     53665     shanxi         111.6333       38.2667           87       167     2012      01        27        027              0.108667      -9.240723       0.000000       0.117487   -9999.000000   -9999.000000       0.027300       0.010000
53665     53665     shanxi         111.6333       38.2667           87       167     2012      01        28        028              0.108958      -7.101654       0.000000       0.127440   -9999.000000   -9999.000000       0.021500   -9999.000000
53665     53665     shanxi         111.6333       38.2667           87       167     2012      01        29        029              0.109292      -6.801086       0.000000       0.130517   -9999.000000   -9999.000000       0.030300       0.027000
53665     53665     shanxi         111.6333       38.2667           87       167     2012      01        30        030              0.109333      -6.888885       0.000000       0.131354   -9999.000000   -9999.000000       0.028500       0.080000
53665     53665     shanxi         111.6333       38.2667           87       167     2012      01        31        031              0.109917      -6.030365       0.000000       0.134343   -9999.000000   -9999.000000   -9999.000000       0.061000
53665     53665     shanxi         111.6333       38.2667           87       167     2012      02        01        032              0.109125      -4.000702       0.000000       0.154558   -9999.000000   -9999.000000       0.028700       0.056000
53665     53665     shanxi         111.6333       38.2667           87       167     2012      02        02        033              0.108333      -9.669464       0.000000       0.120134   -9999.000000   -9999.000000       0.023600   -9999.000000
53665     53665     shanxi         111.6333       38.2667           87       167     2012      02        03        034              0.108500      -9.434479       0.000000       0.118234   -9999.000000   -9999.000000       0.030700       0.017000
53665     53665     shanxi         111.6333       38.2667           87       167     2012      02        04        035              0.109333      -7.421387       0.000000       0.127403   -9999.000000   -9999.000000       0.034500       0.085000
53665     53665     shanxi         111.6333       38.2667           87       167     2012      02        05        036              0.110125      -6.020355       0.000000       0.128878   -9999.000000   -9999.000000       0.028300       0.091000
53665     53665     shanxi         111.6333       38.2667           87       167     2012      02        06        037              0.109542      -3.785889       0.000000       0.149817   -9999.000000   -9999.000000   -9999.000000       0.046000
53665     53665     shanxi         111.6333       38.2667           87       167     2012      02        07        038              0.108500     -10.482086       0.000000       0.118763   -9999.000000   -9999.000000       0.031900       0.002000
53665     53665     shanxi         111.6333       38.2667           87       167     2012      02        08        039              0.108500     -10.939697       0.000000       0.113879   -9999.000000   -9999.000000       0.029600       0.057000
53665     53665     shanxi         111.6333       38.2667           87       167     2012      02        09        040              0.108583     -10.013092       0.000000       0.114755   -9999.000000   -9999.000000       0.038300       0.009000
53665     53665     shanxi         111.6333       38.2667           87       167     2012      02        10        041              0.108708      -9.750885       0.000000       0.115626   -9999.000000   -9999.000000       0.034100       0.022000
53665     53665     shanxi         111.6333       38.2667           87       167     2012      02        11        042              0.109583      -7.793884       0.000000       0.128069   -9999.000000   -9999.000000       0.033700   -9999.000000
53665     53665     shanxi         111.6333       38.2667           87       167     2012      02        12        043              0.109667      -4.231506       0.000000       0.145086   -9999.000000   -9999.000000   -9999.000000       0.040000
53665     53665     shanxi         111.6333       38.2667           87       167     2012      02        13        044              0.110792      -5.534943       0.000000       0.131719   -9999.000000   -9999.000000   -9999.000000       0.057000
53665     53665     shanxi         111.6333       38.2667           87       167     2012      02        14        045              0.111417      -2.448608       0.000000       0.166761   -9999.000000   -9999.000000       0.033400       0.213000
53665     53665     shanxi         111.6333       38.2667           87       167     2012      02        15        046              0.110875      -3.101288       0.000000       0.164304   -9999.000000   -9999.000000       0.042000       0.148000
53665     53665     shanxi         111.6333       38.2667           87       167     2012      02        16        047              0.109625      -4.985443       0.000000       0.147501   -9999.000000   -9999.000000       0.036600   -9999.000000
53665     53665     shanxi         111.6333       38.2667           87       167     2012      02        17        048              0.109333      -7.204529       0.000000       0.127847   -9999.000000   -9999.000000   -9999.000000       0.048000
53665     53665     shanxi         111.6333       38.2667           87       167     2012      02        18        049              0.109125      -8.672241       3.444092       0.121188   -9999.000000   -9999.000000       0.041600       0.068000
53665     53665     shanxi         111.6333       38.2667           87       167     2012      02        19        050              0.109375      -8.245331       0.000000       0.127701       0.079000   -9999.000000       0.037600       0.108000
53665     53665     shanxi         111.6333       38.2667           87       167     2012      02        20        051              0.110792      -4.472137       0.000000       0.151112       0.092000   -9999.000000       0.048800       0.174000
53665     53665     shanxi         111.6333       38.2667           87       167     2012      02        21        052              0.112625      -1.221588       0.000000       0.178709   -9999.000000       0.051200   -9999.000000   -9999.000000
53665     53665     shanxi         111.6333       38.2667           87       167     2012      02        22        053              0.114583       1.259491       0.000000       0.201098   -9999.000000   -9999.000000       0.047300       0.278000
53665     53665     shanxi         111.6333       38.2667           87       167     2012      02        23        054              0.115542       1.531616       0.000000       0.202795   -9999.000000   -9999.000000       0.043100       0.218000
53665     53665     shanxi         111.6333       38.2667           87       167     2012      02        24        055              0.116750       0.623016       0.000000       0.196552   -9999.000000   -9999.000000       0.040900       0.165000
53665     53665     shanxi         111.6333       38.2667           87       167     2012      02        25        056              0.116000      -1.204987       0.000000       0.181766   -9999.000000   -9999.000000       0.038000       0.079000
53665     53665     shanxi         111.6333       38.2667           87       167     2012      02        26        057              0.116375      -2.999695       0.000000       0.153646   -9999.000000       0.044500       0.049600   -9999.000000
53665     53665     shanxi         111.6333       38.2667           87       167     2012      02        27        058              0.115833      -2.341583       0.000000       0.169564   -9999.000000   -9999.000000   -9999.000000       0.110000
53665     53665     shanxi         111.6333       38.2667           87       167     2012      02        28        059              0.116750      -0.062866       0.000000       0.186836       0.077000       0.063000   -9999.000000       0.306000
53665     53665     shanxi         111.6333       38.2667           87       167     2012      02        29        060              0.000000   -9999.000000       0.000000   -9999.000000       0.090000   -9999.000000   -9999.000000   -9999.000000
53665     53665     shanxi         111.6333       38.2667           87       167     2012      03        01        061              0.120500       0.631866       0.000000       0.195678       0.097000   -9999.000000       0.048500       0.122000
53665     53665     shanxi         111.6333       38.2667           87       167     2012      03        02        062              0.123417       1.121399       0.000000       0.205992   -9999.000000   -9999.000000       0.045600   -9999.000000
53665     53665     shanxi         111.6333       38.2667           87       167     2012      03        03        063              0.127417       1.910065       0.000000       0.213962   -9999.000000   -9999.000000       0.053900       0.186000
53665     53665     shanxi         111.6333       38.2667           87       167     2012      03        04        064              0.131208      -0.316071       0.000000       0.186568   -9999.000000       0.115800       0.057700       0.322000
53665     53665     shanxi         111.6333       38.2667           87       167     2012      03        05        065              0.141333       0.732635       0.079590       0.200206       0.093000   -9999.000000   -9999.000000       0.262000
53665     53665     shanxi         111.6333       38.2667           87       167     2012      03        06        066              0.139833      -1.335144       0.298645       0.182131       0.097000   -9999.000000       0.049400       0.065000
53665     53665     shanxi         111.6333       38.2667           87       167     2012      03        07        067              0.000000      -1.268677       0.000000       0.178070       0.100000       0.069500       0.044900       0.257000
53665     53665     shanxi         111.6333       38.2667           87       167     2012      03        08        068              0.137042       0.908020       0.000000       0.193322   -9999.000000   -9999.000000       0.057700       0.217000
53665     53665     shanxi         111.6333       38.2667           87       167     2012      03        09        069              0.144583       0.179688       0.000000       0.192748       0.103000   -9999.000000       0.063800       0.387000
53665     53665     shanxi         111.6333       38.2667           87       167     2012      03        10        070              0.153000       1.046082       0.061219       0.200211       0.081000   -9999.000000       0.049400       0.245000
53665     53665     shanxi         111.6333       38.2667           87       167     2012      03        11        071              0.145958      -0.280884       0.000000       0.188973       0.087000   -9999.000000       0.046000   -9999.000000
53665     53665     shanxi         111.6333       38.2667           87       167     2012      03        12        072              0.154375       0.651459       0.000000       0.188377       0.088000   -9999.000000       0.048900       0.379000
53665     53665     shanxi         111.6333       38.2667           87       167     2012      03        13        073              0.163167       1.228241       0.000000       0.196399   -9999.000000   -9999.000000       0.046600       0.252000
53665     53665     shanxi         111.6333       38.2667           87       167     2012      03        14        074              0.138652       2.624664       0.000000       0.202426   -9999.000000   -9999.000000   -9999.000000       0.433000
53665     53665     shanxi         111.6333       38.2667           87       167     2012      03        15        075              0.126125       5.104828       0.000000       0.226893   -9999.000000   -9999.000000       0.062100       0.495000
53665     53665     shanxi         111.6333       38.2667           87       167     2012      03        16        076              0.176792       2.169434       0.000000       0.222777       0.086000   -9999.000000   -9999.000000   -9999.000000
53665     53665     shanxi         111.6333       38.2667           87       167     2012      03        17        077              0.187333       5.413177       0.000000       0.229506       0.090000   -9999.000000       0.052100       0.642000
53665     53665     shanxi         111.6333       38.2667           87       167     2012      03        18        078              0.206417       6.740692       0.000000       0.235587   -9999.000000   -9999.000000       0.055800       0.539000
53665     53665     shanxi         111.6333       38.2667           87       167     2012      03        19        079              0.206000       4.703644       0.000000       0.234666   -9999.000000   -9999.000000       0.054000       0.555000
53665     53665     shanxi         111.6333       38.2667           87       167     2012      03        20        080              0.206625       3.401764       0.000000       0.231534       0.086000   -9999.000000       0.066300       0.409000
53665     53665     shanxi         111.6333       38.2667           87       167     2012      03        21        081              0.203542       6.451782       0.000000       0.238192       0.096000   -9999.000000       0.069800   -9999.000000
53665     53665     shanxi         111.6333       38.2667           87       167     2012      03        22        082              0.201583       2.841248       0.377832       0.230751       0.116000   -9999.000000   -9999.000000       0.666000
53665     53665     shanxi         111.6333       38.2667           87       167     2012      03        23        083              0.201750       3.117950       0.000000       0.227961   -9999.000000   -9999.000000       0.051900       0.378000
53665     53665     shanxi         111.6333       38.2667           87       167     2012      03        24        084              0.200000       2.384705       0.000000       0.210102   -9999.000000   -9999.000000   -9999.000000       0.521000
53665     53665     shanxi         111.6333       38.2667           87       167     2012      03        25        085              0.000000       5.641663       0.000000       0.219243       0.084000       0.086200       0.064800       0.327000
53665     53665     shanxi         111.6333       38.2667           87       167     2012      03        26        086              0.198500       7.003571       0.250895       0.223031       0.077000   -9999.000000       0.073200   -9999.000000
53665     53665     shanxi         111.6333       38.2667           87       167     2012      03        27        087              0.199250       8.020721       0.000000       0.224256       0.080000   -9999.000000       0.067600       0.440000
53665     53665     shanxi         111.6333       38.2667           87       167     2012      03        28        088              0.199125       9.010040       0.520628       0.227095       0.092000       0.094600       0.074100       0.625000
53665     53665     shanxi         111.6333       38.2667           87       167     2012      03        29        089              0.200333      10.866913       0.000000       0.232766   -9999.000000   -9999.000000       0.055200       0.738000
53665     53665     shanxi         111.6333       38.2667           87       167     2012      03        30        090              0.199875       9.495972       0.257172       0.224684       0.083000       0.030500       0.057900       0.304000
53665     53665     shanxi         111.6333       38.2667           87       167     2012      03        31        091              0.198500       5.362854       0.000000       0.223059       0.073000   -9999.000000       0.063100   -9999.000000
53665     53665     shanxi         111.6333       38.2667           87       167     2012      04        01        092              0.197125       8.475006       0.000000       0.222877       0.083000   -9999.000000       0.068800       0.535000
53665     53665     shanxi         111.6333       38.2667           87       167     2012      04        02        093              0.196625      11.038177       0.033274       0.224424       0.086000       0.033200   -9999.000000       0.390000
53665     53665     shanxi         111.6333       38.2667           87       167     2012      04        03        094              0.196000       4.794617       0.000000       0.209430   -9999.000000       0.409800       0.059100       0.503000
53665     53665     shanxi         111.6333       38.2667           87       167     2012      04        04        095              0.196292       7.447418       0.000000       0.212269   -9999.000000       0.040200       0.057000       0.279000
53665     53665     shanxi         111.6333       38.2667           87       167     2012      04        05        096              0.196292       9.741241       0.000000       0.215322       0.075000   -9999.000000       0.058000       0.528000
53665     53665     shanxi         111.6333       38.2667           87       167     2012      04        06        097              0.195625       9.920563       0.016262       0.212743       0.079000   -9999.000000       0.056600       0.472000
53665     53665     shanxi         111.6333       38.2667           87       167     2012      04        07        098              0.194917      10.468658       0.000000       0.207005       0.077000       0.129500       0.063000       0.608000
53665     53665     shanxi         111.6333       38.2667           87       167     2012      04        08        099              0.196917      11.926636       0.000000       0.205553       0.091000   -9999.000000   -9999.000000       0.469000
53665     53665     shanxi         111.6333       38.2667           87       167     2012      04        09        100              0.198250      13.692078       0.000000       0.201319       0.098000   -9999.000000       0.060200   -9999.000000
53665     53665     shanxi         111.6333       38.2667           87       167     2012      04        10        101              0.197500      14.763245       1.621810       0.198272       0.095000   -9999.000000       0.064300       0.519000
53665     53665     shanxi         111.6333       38.2667           87       167     2012      04        11        102              0.196125      12.059357       0.699902       0.217646       0.081000   -9999.000000       0.069100       0.790000
53665     53665     shanxi         111.6333       38.2667           87       167     2012      04        12        103              0.197583       8.209412       0.038674       0.220150       0.090000   -9999.000000       0.067800       0.762000
53665     53665     shanxi         111.6333       38.2667           87       167     2012      04        13        104              0.197500       9.663452       0.000000       0.221974       0.087500   -9999.000000       0.066900       0.444000
53665     53665     shanxi         111.6333       38.2667           87       167     2012      04        14        105              0.196250      12.489044       0.000000       0.213051       0.093000   -9999.000000       0.056100   -9999.000000
53665     53665     shanxi         111.6333       38.2667           87       167     2012      04        15        106              0.195250      13.637543       0.000000       0.205665       0.077500       0.079900       0.058800       0.514000
53665     53665     shanxi         111.6333       38.2667           87       167     2012      04        16        107              0.193708      14.681732       0.000000       0.198272       0.072500   -9999.000000       0.064200       0.532000
53665     53665     shanxi         111.6333       38.2667           87       167     2012      04        17        108              0.191042      13.792725       0.000000       0.192375       0.074000       0.019200       0.061500       0.464000
53665     53665     shanxi         111.6333       38.2667           87       167     2012      04        18        109              0.191000      16.146667       2.976188       0.189067       0.081000   -9999.000000   -9999.000000       0.472000
53665     53665     shanxi         111.6333       38.2667           87       167     2012      04        19        110              0.189333      15.797546       0.000000       0.213412       0.091000   -9999.000000   -9999.000000   -9999.000000
53665     53665     shanxi         111.6333       38.2667           87       167     2012      04        20        111              0.188500      13.623108       0.594678       0.214083   -9999.000000   -9999.000000       0.065200       0.494000
53665     53665     shanxi         111.6333       38.2667           87       167     2012      04        21        112              0.188667      14.823944       0.000000       0.209188       0.073000   -9999.000000       0.063200       0.398000
53665     53665     shanxi         111.6333       38.2667           87       167     2012      04        22        113              0.188042      15.879303       0.000000       0.202368       0.069000   -9999.000000   -9999.000000       0.501000
53665     53665     shanxi         111.6333       38.2667           87       167     2012      04        23        114              0.196417      18.713470      26.248659       0.190397       0.076000   -9999.000000       0.060300       0.232000
53665     53665     shanxi         111.6333       38.2667           87       167     2012      04        24        115              0.225667      21.129669       0.557129       0.249748   -9999.000000   -9999.000000       0.097300   -9999.000000
53665     53665     shanxi         111.6333       38.2667           87       167     2012      04        25        116              0.000000      11.223389       0.000000       0.297818   -9999.000000   -9999.000000   -9999.000000       0.531000
53665     53665     shanxi         111.6333       38.2667           87       167     2012      04        26        117              0.204167       9.979248       0.327539       0.271957       0.085500   -9999.000000       0.062900       0.398000
53665     53665     shanxi         111.6333       38.2667           87       167     2012      04        27        118              0.200708      15.298370       0.000000       0.258717       0.071000   -9999.000000   -9999.000000       0.500000
53665     53665     shanxi         111.6333       38.2667           87       167     2012      04        28        119              0.198833      15.254120       0.000000       0.247053       0.072000   -9999.000000       0.063700       0.394000
53665     53665     shanxi         111.6333       38.2667           87       167     2012      04        29        120              0.198375      17.654449       0.000000       0.238187       0.087000       0.191900       0.066500   -9999.000000
53665     53665     shanxi         111.6333       38.2667           87       167     2012      04        30        121              0.197750      20.050354       0.118408       0.227388       0.095000       0.168300   -9999.000000       0.473000
53665     53665     shanxi         111.6333       38.2667           87       167     2012      05        01        122              0.193750      21.268494       2.617667       0.219262       0.105000   -9999.000000       0.086900       0.462000
53665     53665     shanxi         111.6333       38.2667           87       167     2012      05        02        123              0.192708      15.865295       0.000000       0.245229       0.084500   -9999.000000       0.072200       0.478000
53665     53665     shanxi         111.6333       38.2667           87       167     2012      05        03        124              0.191292      20.441681       0.068262       0.229115       0.081000       0.149000       0.073400       0.220000
53665     53665     shanxi         111.6333       38.2667           87       167     2012      05        04        125              0.190125      20.686493       0.000000       0.217182       0.087000   -9999.000000       0.067500       0.222000
53665     53665     shanxi         111.6333       38.2667           87       167     2012      05        05        126              0.191083      21.123718       0.000000       0.206948       0.090000   -9999.000000       0.070200       0.388000
53665     53665     shanxi         111.6333       38.2667           87       167     2012      05        06        127              0.192375      21.803131       0.000000       0.196167       0.084000   -9999.000000   -9999.000000       0.348000
53665     53665     shanxi         111.6333       38.2667           87       167     2012      05        07        128              0.192625      23.274200       0.000000       0.189361   -9999.000000   -9999.000000       0.056400       0.382000
53665     53665     shanxi         111.6333       38.2667           87       167     2012      05        08        129              0.192833      21.681915       0.346530       0.189540       0.065000       0.027200       0.052800   -9999.000000
53665     53665     shanxi         111.6333       38.2667           87       167     2012      05        09        130              0.193042      23.883118       5.322585       0.188208       0.077000   -9999.000000       0.067700       0.815000
53665     53665     shanxi         111.6333       38.2667           87       167     2012      05        10        131              0.193708      19.712677       2.497695       0.245982   -9999.000000   -9999.000000       0.061300       0.487000
53665     53665     shanxi         111.6333       38.2667           87       167     2012      05        11        132              0.190667      23.167572       1.275527       0.228309       0.155000   -9999.000000       0.078200       0.870000
53665     53665     shanxi         111.6333       38.2667           87       167     2012      05        12        133              0.186167      17.137970       0.000000       0.250937       0.109500       0.186200       0.064300       0.325000
53665     53665     shanxi         111.6333       38.2667           87       167     2012      05        13        134              0.182208      15.446411       0.000000       0.228447       0.097000   -9999.000000       0.060000   -9999.000000
53665     53665     shanxi         111.6333       38.2667           87       167     2012      05        14        135              0.179792      15.391266       0.000000       0.218005       0.090000   -9999.000000       0.092300       0.385000
53665     53665     shanxi         111.6333       38.2667           87       167     2012      05        15        136              0.180333      15.558716       0.000000       0.208817       0.121000   -9999.000000       0.084600       0.351000
53665     53665     shanxi         111.6333       38.2667           87       167     2012      05        16        137              0.180042      17.407806       0.000000       0.200181       0.116000   -9999.000000       0.089000       0.315000
53665     53665     shanxi         111.6333       38.2667           87       167     2012      05        17        138              0.179833      17.506653       0.000000       0.193047       0.101500   -9999.000000       0.088500       0.294000
53665     53665     shanxi         111.6333       38.2667           87       167     2012      05        18        139              0.180750      20.612427       0.471475       0.184622       0.107500       0.171900       0.088600   -9999.000000
53665     53665     shanxi         111.6333       38.2667           87       167     2012      05        19        140              0.183542      23.647461       0.284963       0.182243       0.091000   -9999.000000       0.086400       0.368000
53665     53665     shanxi         111.6333       38.2667           87       167     2012      05        20        141              0.182458      24.195007       0.794115       0.181620   -9999.000000   -9999.000000       0.084300       0.334000
53665     53665     shanxi         111.6333       38.2667           87       167     2012      05        21        142              0.175958      23.867371       2.638021       0.180654       0.205000   -9999.000000       0.139600       0.317000
53665     53665     shanxi         111.6333       38.2667           87       167     2012      05        22        143              0.175375      15.558960       0.000000       0.220395       0.144500   -9999.000000       0.115300       0.253000
53665     53665     shanxi         111.6333       38.2667           87       167     2012      05        23        144              0.175458      18.409149       0.101299       0.209851   -9999.000000       0.169400   -9999.000000   -9999.000000
53665     53665     shanxi         111.6333       38.2667           87       167     2012      05        24        145              0.175542      18.597137       0.000000       0.198346   -9999.000000   -9999.000000       0.116600       0.247000
53665     53665     shanxi         111.6333       38.2667           87       167     2012      05        25        146              0.000000      19.491821       0.220558       0.189025       0.119000   -9999.000000       0.118200       0.315000
53665     53665     shanxi         111.6333       38.2667           87       167     2012      05        26        147              0.174208      19.675781       0.086007       0.184084       0.153000       0.076800       0.104300       0.222000
53665     53665     shanxi         111.6333       38.2667           87       167     2012      05        27        148              0.173708      22.151367       0.000000       0.176823       0.140500   -9999.000000       0.103900       0.189000
53665     53665     shanxi         111.6333       38.2667           87       167     2012      05        28        149              0.172333      23.539215      11.312343       0.170253       0.112000   -9999.000000       0.107900   -9999.000000
53665     53665     shanxi         111.6333       38.2667           87       167     2012      05        29        150              0.173000      23.588593       0.438349       0.200526       0.145000   -9999.000000       0.126800       0.370000
53665     53665     shanxi         111.6333       38.2667           87       167     2012      05        30        151              0.174667      19.164368       2.408708       0.255491       0.138000   -9999.000000       0.123000   -9999.000000
53665     53665     shanxi         111.6333       38.2667           87       167     2012      05        31        152              0.180958      20.202209      12.864809       0.237515       0.251000       0.261200   -9999.000000   -9999.000000
53665     53665     shanxi         111.6333       38.2667           87       167     2012      06        01        153              0.194417      18.268768       0.191734       0.287485       0.225000   -9999.000000       0.140100       0.538000
53665     53665     shanxi         111.6333       38.2667           87       167     2012      06        02        154              0.186958      19.518494       4.281716       0.273524       0.195500   -9999.000000       0.124800       0.470000
53665     53665     shanxi         111.6333       38.2667           87       167     2012      06        03        155              0.195500      20.153625       4.690447       0.268960       0.243000   -9999.000000   -9999.000000       0.881000
53665     53665     shanxi         111.6333       38.2667           87       167     2012      06        04        156              0.196833      18.516937       0.062307       0.290806       0.149000   -9999.000000       0.145500       0.671000
53665     53665     shanxi         111.6333       38.2667           87       167     2012      06        05        157              0.190333      21.373077       0.153709       0.262538       0.194000       0.233300       0.147000       0.377000
53665     53665     shanxi         111.6333       38.2667           87       167     2012      06        06        158              0.185500      22.064545       1.861018       0.248934       0.210000   -9999.000000       0.146000   -9999.000000
53665     53665     shanxi         111.6333       38.2667           87       167     2012      06        07        159              0.182083      19.549713       5.528925       0.258605       0.215500       0.204000       0.139200       0.273000
53665     53665     shanxi         111.6333       38.2667           87       167     2012      06        08        160              0.183917      18.717285       0.000000       0.274097       0.188000   -9999.000000       0.134100       0.350000
53665     53665     shanxi         111.6333       38.2667           87       167     2012      06        09        161              0.183333      20.825226       0.117316       0.263877       0.147000   -9999.000000   -9999.000000       0.415000
53665     53665     shanxi         111.6333       38.2667           87       167     2012      06        10        162              0.178417      22.664459       0.000000       0.245861       0.190000       0.134200       0.127100       0.277000
53665     53665     shanxi         111.6333       38.2667           87       167     2012      06        11        163              0.000000      19.807159       0.000000       0.232229       0.205000   -9999.000000       0.137100   -9999.000000
53665     53665     shanxi         111.6333       38.2667           87       167     2012      06        12        164              0.171125      20.775421       0.000000       0.220047       0.179500   -9999.000000       0.129400       0.290000
53665     53665     shanxi         111.6333       38.2667           87       167     2012      06        13        165              0.167667      22.127655       0.019033       0.209767       0.170500       0.100400       0.127800       0.280000
53665     53665     shanxi         111.6333       38.2667           87       167     2012      06        14        166              0.163083      22.635254       0.000000       0.201631       0.168000   -9999.000000       0.132000       0.298000
53665     53665     shanxi         111.6333       38.2667           87       167     2012      06        15        167              0.159708      20.235016       0.000000       0.197876       0.187000       0.026200       0.135600       0.347000
53665     53665     shanxi         111.6333       38.2667           87       167     2012      06        16        168              0.156292      21.508881       0.000000       0.192637       0.204000   -9999.000000       0.137500   -9999.000000
53665     53665     shanxi         111.6333       38.2667           87       167     2012      06        17        169              0.152208      23.661285       0.000000       0.184978       0.188000   -9999.000000       0.137800       0.351000
53665     53665     shanxi         111.6333       38.2667           87       167     2012      06        18        170              0.148250      25.895844       0.000000       0.177916       0.170000       0.096800       0.152400       0.359000
53665     53665     shanxi         111.6333       38.2667           87       167     2012      06        19        171              0.144333      27.357727       9.345840       0.173177   -9999.000000   -9999.000000       0.162100       0.321000
53665     53665     shanxi         111.6333       38.2667           87       167     2012      06        20        172              0.145833      22.783295       0.026193       0.247066       0.183000   -9999.000000   -9999.000000       0.261000
53665     53665     shanxi         111.6333       38.2667           87       167     2012      06        21        173              0.145833      23.486633       3.185351       0.232841       0.225000   -9999.000000       0.180600   -9999.000000
53665     53665     shanxi         111.6333       38.2667           87       167     2012      06        22        174              0.144208      24.452454       2.930390       0.227753       0.252000   -9999.000000       0.176400       0.669000
53665     53665     shanxi         111.6333       38.2667           87       167     2012      06        23        175              0.147500      25.588348      16.216982       0.242890       0.280000       0.085800       0.194900       0.604000
53665     53665     shanxi         111.6333       38.2667           87       167     2012      06        24        176              0.184125      23.926300       3.747428       0.290686       0.260000       0.225200       0.194700       0.897000
53665     53665     shanxi         111.6333       38.2667           87       167     2012      06        25        177              0.189375      21.712036       0.522796       0.295091       0.199000   -9999.000000       0.171300       0.581000
53665     53665     shanxi         111.6333       38.2667           87       167     2012      06        26        178              0.183125      23.280975       0.240491       0.274244       0.241000   -9999.000000   -9999.000000   -9999.000000
53665     53665     shanxi         111.6333       38.2667           87       167     2012      06        27        179              0.186125      22.319733      14.713218       0.263772   -9999.000000       0.211500       0.201400       0.991000
53665     53665     shanxi         111.6333       38.2667           87       167     2012      06        28        180              0.253875      19.273315      38.262730       0.296253       0.352000       0.204400       0.184900       1.000000
53665     53665     shanxi         111.6333       38.2667           87       167     2012      06        29        181              0.235750      18.301117       0.153146       0.356554       0.292000   -9999.000000       0.212200       0.962000
53665     53665     shanxi         111.6333       38.2667           87       167     2012      06        30        182              0.216375      20.884125       0.000000       0.336381       0.218000   -9999.000000       0.172000   -9999.000000
53665     53665     shanxi         111.6333       38.2667           87       167     2012      07        01        183              0.205333      23.291290       0.217242       0.312530       0.204500       0.194400       0.160000       0.767000
53665     53665     shanxi         111.6333       38.2667           87       167     2012      07        02        184              0.195458      24.616425       0.000000       0.299706       0.231000   -9999.000000       0.171200       0.516000
53665     53665     shanxi         111.6333       38.2667           87       167     2012      07        03        185              0.184917      25.149597       6.869642       0.287666       0.199000       0.082900       0.191200       0.562000
53665     53665     shanxi         111.6333       38.2667           87       167     2012      07        04        186              0.181583      24.400818       1.792153       0.300496       0.211500   -9999.000000       0.190700       0.566000
53665     53665     shanxi         111.6333       38.2667           87       167     2012      07        05        187              0.178875      23.282532       0.060472       0.298968       0.187000   -9999.000000       0.166800   -9999.000000
53665     53665     shanxi         111.6333       38.2667           87       167     2012      07        06        188              0.173583      25.025360       0.250996       0.285804   -9999.000000       0.101900       0.177400       0.645000
53665     53665     shanxi         111.6333       38.2667           87       167     2012      07        07        189              0.170875      25.245453       0.034121       0.278489   -9999.000000   -9999.000000   -9999.000000       0.542000
53665     53665     shanxi         111.6333       38.2667           87       167     2012      07        08        190              0.174083      23.770782       9.495455       0.274752       0.286000   -9999.000000       0.195400       0.602000
53665     53665     shanxi         111.6333       38.2667           87       167     2012      07        09        191              0.202667      22.953003       4.726572       0.305673       0.239500   -9999.000000       0.160600       0.917000
53665     53665     shanxi         111.6333       38.2667           87       167     2012      07        10        192              0.207250      22.111908       0.291945       0.312303       0.188000   -9999.000000       0.161200   -9999.000000
53665     53665     shanxi         111.6333       38.2667           87       167     2012      07        11        193              0.195000      24.159363       0.000000       0.293062       0.189000       0.218900       0.142900       0.665000
53665     53665     shanxi         111.6333       38.2667           87       167     2012      07        12        194              0.185583      24.503510       0.000000       0.278983       0.233000   -9999.000000       0.135500       0.535000
53665     53665     shanxi         111.6333       38.2667           87       167     2012      07        13        195              0.181375      25.274353       3.050352       0.268873       0.261000   -9999.000000   -9999.000000       0.482000
53665     53665     shanxi         111.6333       38.2667           87       167     2012      07        14        196              0.181292      23.620026      10.807412       0.275740       0.184000   -9999.000000       0.162700       0.857000
53665     53665     shanxi         111.6333       38.2667           87       167     2012      07        15        197              0.182167      22.598145       0.922154       0.308642       0.237000   -9999.000000       0.156600   -9999.000000
53665     53665     shanxi         111.6333       38.2667           87       167     2012      07        16        198              0.180167      22.917511       0.059113       0.298103       0.190000       0.323600       0.188000       0.759000
53665     53665     shanxi         111.6333       38.2667           87       167     2012      07        17        199              0.175458      23.507172       0.000000       0.281768       0.225500   -9999.000000       0.183100       0.518000
53665     53665     shanxi         111.6333       38.2667           87       167     2012      07        18        200              0.169625      23.123047       0.000000       0.270710       0.229000   -9999.000000       0.183800       0.535000
53665     53665     shanxi         111.6333       38.2667           87       167     2012      07        19        201              0.164375      23.749359       0.000000       0.263732       0.193500       0.124200       0.181300       0.471000
53665     53665     shanxi         111.6333       38.2667           87       167     2012      07        20        202              0.159391      24.620575       5.822072       0.255223       0.152000       0.266700       0.194200   -9999.000000
53665     53665     shanxi         111.6333       38.2667           87       167     2012      07        21        203              0.188739      25.701050      28.326944       0.263622   -9999.000000       0.137100       0.206200       0.920000
53665     53665     shanxi         111.6333       38.2667           87       167     2012      07        22        204              0.205875      20.892517       0.000000       0.348338       0.289000   -9999.000000       0.200100       0.656000
53665     53665     shanxi         111.6333       38.2667           87       167     2012      07        23        205              0.195958      22.290985       0.251083       0.309521       0.287000   -9999.000000       0.219900       0.765000
53665     53665     shanxi         111.6333       38.2667           87       167     2012      07        24        206              0.189750      22.938385       2.338393       0.298828       0.286000       0.129900   -9999.000000       0.779000
53665     53665     shanxi         111.6333       38.2667           87       167     2012      07        25        207              0.187500      22.967163       0.792622       0.300244       0.292000   -9999.000000       0.226300   -9999.000000
53665     53665     shanxi         111.6333       38.2667           87       167     2012      07        26        208              0.190500      23.365906      44.167843       0.297986       0.263000   -9999.000000       0.166600       0.889000
53665     53665     shanxi         111.6333       38.2667           87       167     2012      07        27        209              0.258458      24.633087      44.987053       0.347819       0.313000   -9999.000000       0.256700       0.913000
53665     53665     shanxi         111.6333       38.2667           87       167     2012      07        28        210              0.255583      22.382111       1.045303       0.392346       0.308000   -9999.000000       0.252600       0.935000
53665     53665     shanxi         111.6333       38.2667           87       167     2012      07        29        211              0.233708      24.413239       0.000000       0.348368       0.290000       0.338700       0.230400       0.853000
53665     53665     shanxi         111.6333       38.2667           87       167     2012      07        30        212              0.269125      25.051910      41.439819       0.327431       0.330000   -9999.000000       0.231700       0.954000
53665     53665     shanxi         111.6333       38.2667           87       167     2012      07        31        213              0.267083      21.334259      11.681137       0.373662       0.309000   -9999.000000       0.224700       0.966000
53665     53665     shanxi         111.6333       38.2667           87       167     2012      08        01        214              0.251125      20.910278       0.188151       0.363405       0.411000   -9999.000000       0.216500       0.955000
53665     53665     shanxi         111.6333       38.2667           87       167     2012      08        02        215              0.241625      22.850922       0.000000       0.338908       0.368000       0.153300       0.215500       0.779000
53665     53665     shanxi         111.6333       38.2667           87       167     2012      08        03        216              0.233083      24.487335       0.000000       0.326479       0.389000   -9999.000000       0.210300   -9999.000000
53665     53665     shanxi         111.6333       38.2667           87       167     2012      08        04        217              0.225292      24.719452       0.000000       0.317099       0.332000   -9999.000000   -9999.000000       0.816000
53665     53665     shanxi         111.6333       38.2667           87       167     2012      08        05        218              0.217833      24.994507       0.326497       0.308836       0.315000   -9999.000000       0.205200       0.699000
53665     53665     shanxi         111.6333       38.2667           87       167     2012      08        06        219              0.214750      22.934570       0.323845       0.306911       0.306000   -9999.000000       0.196400       0.691000
53665     53665     shanxi         111.6333       38.2667           87       167     2012      08        07        220              0.211500      23.791016       0.333553       0.303823       0.273000   -9999.000000       0.182700       0.603000
53665     53665     shanxi         111.6333       38.2667           87       167     2012      08        08        221              0.207667      25.710724       3.412274       0.298853       0.373000       0.149700       0.195700   -9999.000000
53665     53665     shanxi         111.6333       38.2667           87       167     2012      08        09        222              0.205042      24.182709       0.000000       0.306423       0.335000   -9999.000000       0.185600       0.666000
53665     53665     shanxi         111.6333       38.2667           87       167     2012      08        10        223              0.198750      23.845673       0.000000       0.292127       0.280500   -9999.000000   -9999.000000       0.549000
53665     53665     shanxi         111.6333       38.2667           87       167     2012      08        11        224              0.195000      22.947357       4.502672       0.284626       0.302000       0.117400       0.201400       0.495000
53665     53665     shanxi         111.6333       38.2667           87       167     2012      08        12        225              0.194625      21.333801       0.126749       0.300745       0.299000       0.227600       0.196800       0.565000
53665     53665     shanxi         111.6333       38.2667           87       167     2012      08        13        226              0.192250      22.801666       0.909318       0.295483       0.286000       0.164000       0.194400   -9999.000000
53665     53665     shanxi         111.6333       38.2667           87       167     2012      08        14        227              0.195417      21.669128       6.907905       0.291321       0.357000   -9999.000000       0.208000       0.946000
53665     53665     shanxi         111.6333       38.2667           87       167     2012      08        15        228              0.201083      20.716187       0.000000       0.314596       0.311500   -9999.000000       0.189100       0.694000
53665     53665     shanxi         111.6333       38.2667           87       167     2012      08        16        229              0.198750      22.909821       0.625825       0.295055       0.213000       0.156500       0.190000       0.670000
53665     53665     shanxi         111.6333       38.2667           87       167     2012      08        17        230              0.201750      22.660736      12.794079       0.289298       0.393000   -9999.000000       0.184900       0.899000
53665     53665     shanxi         111.6333       38.2667           87       167     2012      08        18        231              0.222917      20.158661       4.523084       0.318422       0.369000   -9999.000000       0.205100   -9999.000000
53665     53665     shanxi         111.6333       38.2667           87       167     2012      08        19        232              0.221042      19.810608       0.000000       0.327702       0.331000   -9999.000000       0.201900       0.708000
53665     53665     shanxi         111.6333       38.2667           87       167     2012      08        20        233              0.213250      21.927460       0.386129       0.306454       0.328000       0.232500       0.209300       0.667000
53665     53665     shanxi         111.6333       38.2667           87       167     2012      08        21        234              0.204667      21.128448       0.000000       0.298908       0.290000   -9999.000000   -9999.000000       0.602000
53665     53665     shanxi         111.6333       38.2667           87       167     2012      08        22        235              0.196417      17.996124       0.000000       0.289522       0.271000   -9999.000000       0.212100   -9999.000000
53665     53665     shanxi         111.6333       38.2667           87       167     2012      08        23        236              0.191292      18.866882       0.000000       0.284079       0.267000   -9999.000000       0.208600   -9999.000000
53665     53665     shanxi         111.6333       38.2667           87       167     2012      08        24        237              0.185750      19.305450       0.000000       0.278908       0.207000   -9999.000000       0.212400       0.536000
53665     53665     shanxi         111.6333       38.2667           87       167     2012      08        25        238              0.000000      19.949036       0.000000       0.273580       0.347000       0.059300       0.206800       0.546000
53665     53665     shanxi         111.6333       38.2667           87       167     2012      08        26        239              0.177792      21.254089       0.000000       0.271016       0.326000       0.163600       0.212100       0.586000
53665     53665     shanxi         111.6333       38.2667           87       167     2012      08        27        240              0.151667      21.507172       1.729873       0.269373       0.282000   -9999.000000   -9999.000000       0.355000
53665     53665     shanxi         111.6333       38.2667           87       167     2012      08        28        241              0.149917      21.474670       0.180449       0.269541       0.285000   -9999.000000       0.165500       0.377000
53665     53665     shanxi         111.6333       38.2667           87       167     2012      08        29        242              0.150375      21.855255       0.000000       0.262667       0.281000       0.052600       0.171300       0.403000
53665     53665     shanxi         111.6333       38.2667           87       167     2012      08        30        243              0.149125      22.191803       0.000000       0.255202       0.298000   -9999.000000       0.163000       0.570000
53665     53665     shanxi         111.6333       38.2667           87       167     2012      08        31        244              0.147417      21.645111       6.682444       0.251456       0.318000   -9999.000000       0.166200       0.497000
53665     53665     shanxi         111.6333       38.2667           87       167     2012      09        01        245              0.198500      20.525696      36.459778       0.265665       0.347000   -9999.000000       0.194600   -9999.000000
53665     53665     shanxi         111.6333       38.2667           87       167     2012      09        02        246              0.189000      16.563812       0.057254       0.360712       0.374000   -9999.000000       0.189100       0.886000
53665     53665     shanxi         111.6333       38.2667           87       167     2012      09        03        247              0.179208      16.712036       0.000000       0.323806       0.308000       0.222800       0.223900       0.666000
53665     53665     shanxi         111.6333       38.2667           87       167     2012      09        04        248              0.174917      15.870880       5.765892       0.311518       0.333000   -9999.000000       0.214400       0.747000
53665     53665     shanxi         111.6333       38.2667           87       167     2012      09        05        249              0.171875      17.220123       3.671244       0.308498       0.305000   -9999.000000       0.216600       0.648000
53665     53665     shanxi         111.6333       38.2667           87       167     2012      09        06        250              0.183375      18.229614       4.439245       0.320821       0.302000   -9999.000000       0.215700   -9999.000000
53665     53665     shanxi         111.6333       38.2667           87       167     2012      09        07        251              0.189250      16.606140       0.000000       0.324952       0.285500       0.282800   -9999.000000       0.911000
53665     53665     shanxi         111.6333       38.2667           87       167     2012      09        08        252              0.184542      18.477112       0.000000       0.310870       0.275000       0.297400       0.219000       0.721000
53665     53665     shanxi         111.6333       38.2667           87       167     2012      09        09        253              0.180333      18.599609       0.000000       0.302208       0.275000   -9999.000000       0.208800       0.742000
53665     53665     shanxi         111.6333       38.2667           87       167     2012      09        10        254              0.176500      19.062195       1.637838       0.295032       0.327000   -9999.000000       0.142800       0.758000
53665     53665     shanxi         111.6333       38.2667           87       167     2012      09        11        255              0.175500      16.866089       0.000000       0.299894       0.263000   -9999.000000       0.135200   -9999.000000
53665     53665     shanxi         111.6333       38.2667           87       167     2012      09        12        256              0.171625      16.864532       0.000000       0.293414       0.241500   -9999.000000       0.140500       0.444000
53665     53665     shanxi         111.6333       38.2667           87       167     2012      09        13        257              0.169875      11.638214       1.873914       0.290578       0.217000   -9999.000000   -9999.000000       0.599000
53665     53665     shanxi         111.6333       38.2667           87       167     2012      09        14        258              0.169417      13.035980       0.000000       0.294580       0.219000   -9999.000000       0.131000       0.609000
53665     53665     shanxi         111.6333       38.2667           87       167     2012      09        15        259              0.168708      14.143402       0.833635       0.289236       0.270000   -9999.000000       0.136200       0.363000
53665     53665     shanxi         111.6333       38.2667           87       167     2012      09        16        260              0.167708      15.545258       0.000000       0.286343       0.256000       0.084800       0.136500   -9999.000000
53665     53665     shanxi         111.6333       38.2667           87       167     2012      09        17        261              0.167292      15.468964       1.562728       0.283773       0.225500       0.218400       0.118800       0.580000
53665     53665     shanxi         111.6333       38.2667           87       167     2012      09        18        262              0.166292      16.047211       0.463472       0.287705       0.250000       0.067000       0.128500       0.659000
53665     53665     shanxi         111.6333       38.2667           87       167     2012      09        19        263              0.165542      15.457184       0.154284       0.286248       0.212000   -9999.000000       0.122800       0.617000
53665     53665     shanxi         111.6333       38.2667           87       167     2012      09        20        264              0.164125      16.080841       5.882292       0.281173       0.208000       0.219100       0.144300       0.458000
53665     53665     shanxi         111.6333       38.2667           87       167     2012      09        21        265              0.181750      17.191193       4.643335       0.287241   -9999.000000       0.150900       0.135600   -9999.000000
53665     53665     shanxi         111.6333       38.2667           87       167     2012      09        22        266              0.187375      13.564270       0.000000       0.315559       0.240500       0.132100       0.142400       0.800000
53665     53665     shanxi         111.6333       38.2667           87       167     2012      09        23        267              0.182917      16.312439       0.000000       0.298205       0.199500   -9999.000000       0.138500       0.622000
53665     53665     shanxi         111.6333       38.2667           87       167     2012      09        24        268              0.178667      17.602203       1.366454       0.290847       0.201000   -9999.000000   -9999.000000       0.641000
53665     53665     shanxi         111.6333       38.2667           87       167     2012      09        25        269              0.212042      16.573517      21.519537       0.291079   -9999.000000   -9999.000000       0.160500       0.859000
53665     53665     shanxi         111.6333       38.2667           87       167     2012      09        26        270              0.204696      12.193695       0.000000       0.345518       0.242000       0.233500       0.160900       0.879000
53665     53665     shanxi         111.6333       38.2667           87       167     2012      09        27        271              0.195571      14.678497       0.000000       0.317984   -9999.000000   -9999.000000       0.167600       0.676000
53665     53665     shanxi         111.6333       38.2667           87       167     2012      09        28        272              0.186733      12.184418       0.000000       0.307472       0.205000   -9999.000000       0.160900       0.644000
53665     53665     shanxi         111.6333       38.2667           87       167     2012      09        29        273              0.183625      10.895142       0.000000       0.301957       0.232000   -9999.000000       0.159200       0.498000
53665     53665     shanxi         111.6333       38.2667           87       167     2012      09        30        274              0.181000      11.283295       0.000000       0.297657       0.220000       0.108600   -9999.000000   -9999.000000
53665     53665     shanxi         111.6333       38.2667           87       167     2012      10        01        275              0.179125      11.585266       0.000000       0.293987       0.189000   -9999.000000       0.109100       0.506000
53665     53665     shanxi         111.6333       38.2667           87       167     2012      10        02        276              0.177708      13.076843       0.213629       0.290914       0.187000   -9999.000000       0.117000       0.617000
53665     53665     shanxi         111.6333       38.2667           87       167     2012      10        03        277              0.178833      14.030029       0.000000       0.290092       0.169500   -9999.000000       0.111000       0.579000
53665     53665     shanxi         111.6333       38.2667           87       167     2012      10        04        278              0.174250      14.163605       2.588155       0.285744       0.201000       0.145600       0.131800       0.667000
53665     53665     shanxi         111.6333       38.2667           87       167     2012      10        05        279              0.174042      10.191071       0.000000       0.297866       0.184000       0.100500   -9999.000000   -9999.000000
53665     53665     shanxi         111.6333       38.2667           87       167     2012      10        06        280              0.179417      10.501678       0.192655       0.291213       0.191000   -9999.000000       0.118200       0.470000
53665     53665     shanxi         111.6333       38.2667           87       167     2012      10        07        281              0.180875      12.411896       0.000000       0.287167       0.201000   -9999.000000       0.117700       0.487000
53665     53665     shanxi         111.6333       38.2667           87       167     2012      10        08        282              0.180250      12.395660       0.458394       0.286663       0.218000   -9999.000000       0.109200       0.538000
53665     53665     shanxi         111.6333       38.2667           87       167     2012      10        09        283              0.178125      13.499420       0.122372       0.286627       0.160000       0.273700       0.104400       0.420000
53665     53665     shanxi         111.6333       38.2667           87       167     2012      10        10        284              0.181542      10.161407       0.000000       0.282495       0.176000   -9999.000000       0.105400   -9999.000000
53665     53665     shanxi         111.6333       38.2667           87       167     2012      10        11        285              0.181375      10.366425       0.000000       0.280224       0.128000   -9999.000000   -9999.000000       0.425000
53665     53665     shanxi         111.6333       38.2667           87       167     2012      10        12        286              0.180792      11.360840       0.000000       0.278033       0.132000   -9999.000000       0.105700       0.552000
53665     53665     shanxi         111.6333       38.2667           87       167     2012      10        13        287              0.179625      11.426575       0.000000       0.275868       0.134000   -9999.000000       0.106100       0.475000
53665     53665     shanxi         111.6333       38.2667           87       167     2012      10        14        288              0.178708      11.904663       0.000000       0.274513       0.128000       0.148100       0.101200       0.457000
53665     53665     shanxi         111.6333       38.2667           87       167     2012      10        15        289              0.178000      12.472748       8.026594       0.274422   -9999.000000       0.228600       0.098900   -9999.000000
53665     53665     shanxi         111.6333       38.2667           87       167     2012      10        16        290              0.182042       9.925598       3.288035       0.295468       0.169000   -9999.000000       0.121100       0.689000
53665     53665     shanxi         111.6333       38.2667           87       167     2012      10        17        291              0.182167       6.691162       2.822965       0.299252       0.146000   -9999.000000       0.103900       0.592000
53665     53665     shanxi         111.6333       38.2667           87       167     2012      10        18        292              0.181750       6.173492       0.699081       0.296709   -9999.000000       0.302200       0.103500       0.747000
53665     53665     shanxi         111.6333       38.2667           87       167     2012      10        19        293              0.182167       6.241943       0.000000       0.288282       0.147000       0.158100       0.106000       0.516000
53665     53665     shanxi         111.6333       38.2667           87       167     2012      10        20        294              0.183750       8.316467       0.093482       0.288234       0.131000   -9999.000000       0.104100   -9999.000000
53665     53665     shanxi         111.6333       38.2667           87       167     2012      10        21        295              0.185000      10.855316       2.458708       0.286483   -9999.000000   -9999.000000       0.113000       0.703000
53665     53665     shanxi         111.6333       38.2667           87       167     2012      10        22        296              0.182583       5.169830       1.033279       0.294290   -9999.000000       0.258200   -9999.000000       0.490000
53665     53665     shanxi         111.6333       38.2667           87       167     2012      10        23        297              0.181792       5.712769       0.057430       0.285203   -9999.000000       0.320500       0.093800       0.578000
53665     53665     shanxi         111.6333       38.2667           87       167     2012      10        24        298              0.181792       6.737976       0.439687       0.286367   -9999.000000       0.149600       0.091400       0.344000
53665     53665     shanxi         111.6333       38.2667           87       167     2012      10        25        299              0.000000       7.646759       0.000000       0.284100       0.131000   -9999.000000       0.093000       0.576000
53665     53665     shanxi         111.6333       38.2667           87       167     2012      10        26        300              0.179500       8.446594       0.054741       0.283182       0.161000   -9999.000000       0.092900       0.499000
53665     53665     shanxi         111.6333       38.2667           87       167     2012      10        27        301              0.177792       6.547150       0.104542       0.284103       0.142000       0.407100       0.096600       0.583000
53665     53665     shanxi         111.6333       38.2667           87       167     2012      10        28        302              0.000000       7.305328       0.108544       0.280452       0.143000   -9999.000000   -9999.000000       0.491000
53665     53665     shanxi         111.6333       38.2667           87       167     2012      10        29        303              0.178083       8.599213       0.012902       0.280929   -9999.000000   -9999.000000       0.074500   -9999.000000
53665     53665     shanxi         111.6333       38.2667           87       167     2012      10        30        304              0.177792       6.291779       0.160551       0.263829       0.119000   -9999.000000       0.077300       0.406000
53665     53665     shanxi         111.6333       38.2667           87       167     2012      10        31        305              0.178083       4.123901       0.000000       0.266065       0.109000   -9999.000000       0.080400       0.424000
53665     53665     shanxi         111.6333       38.2667           87       167     2012      11        01        306              0.177125       4.795319       0.000000       0.261486       0.111000       0.171200       0.078900       0.404000
53665     53665     shanxi         111.6333       38.2667           87       167     2012      11        02        307              0.175667       5.214600       0.166685       0.266259       0.114000   -9999.000000       0.084500       0.454000
53665     53665     shanxi         111.6333       38.2667           87       167     2012      11        03        308              0.172750       7.238770       0.341004       0.272291   -9999.000000   -9999.000000       0.072300   -9999.000000
53665     53665     shanxi         111.6333       38.2667           87       167     2012      11        04        309              0.162167      -0.314056       1.619710       0.205007   -9999.000000   -9999.000000       0.068900       0.333000
53665     53665     shanxi         111.6333       38.2667           87       167     2012      11        05        310              0.158042      -2.731415       1.581332       0.149708       0.136000       0.100900       0.057700       0.344000
53665     53665     shanxi         111.6333       38.2667           87       167     2012      11        06        311              0.165083       0.017517       0.170542       0.195049       0.145000       0.051700       0.074000       0.457000
53665     53665     shanxi         111.6333       38.2667           87       167     2012      11        07        312              0.166917       1.978424       0.347615       0.227311       0.146000   -9999.000000       0.075100       0.260000
53665     53665     shanxi         111.6333       38.2667           87       167     2012      11        08        313              0.165500       0.792023       0.952783       0.213018   -9999.000000   -9999.000000   -9999.000000   -9999.000000
53665     53665     shanxi         111.6333       38.2667           87       167     2012      11        09        314              0.166542       2.242676       0.365556       0.237564       0.140000       0.073100       0.071700       0.443000
53665     53665     shanxi         111.6333       38.2667           87       167     2012      11        10        315              0.168583       1.873260       0.061413       0.249822   -9999.000000   -9999.000000       0.052100       0.343000
53665     53665     shanxi         111.6333       38.2667           87       167     2012      11        11        316              0.162583      -1.100677       0.000000       0.191836   -9999.000000       0.088300       0.062600       0.228000
53665     53665     shanxi         111.6333       38.2667           87       167     2012      11        12        317              0.149292      -2.338135       0.000000       0.161147   -9999.000000   -9999.000000       0.061400       0.242000
53665     53665     shanxi         111.6333       38.2667           87       167     2012      11        13        318              0.000000      -1.064270       0.000000       0.179912   -9999.000000   -9999.000000       0.058100   -9999.000000
53665     53665     shanxi         111.6333       38.2667           87       167     2012      11        14        319              0.125375      -1.517151       0.000000       0.175597   -9999.000000   -9999.000000   -9999.000000       0.342000
53665     53665     shanxi         111.6333       38.2667           87       167     2012      11        15        320              0.125000       0.228851       0.000000       0.196721   -9999.000000   -9999.000000       0.051100       0.271000
53665     53665     shanxi         111.6333       38.2667           87       167     2012      11        16        321              0.124083      -0.603546       0.000000       0.181152   -9999.000000       0.056000       0.052100       0.252000
53665     53665     shanxi         111.6333       38.2667           87       167     2012      11        17        322              0.000000      -1.287170       0.000000       0.178806       0.135000   -9999.000000       0.066300       0.242000
53665     53665     shanxi         111.6333       38.2667           87       167     2012      11        18        323              0.122708       0.434235       0.251408       0.199630       0.130000   -9999.000000       0.056200   -9999.000000
53665     53665     shanxi         111.6333       38.2667           87       167     2012      11        19        324              0.121625       0.311798       0.444557       0.204281   -9999.000000   -9999.000000       0.062400       0.194000
53665     53665     shanxi         111.6333       38.2667           87       167     2012      11        20        325              0.126375       0.708252       0.000000       0.204872   -9999.000000   -9999.000000       0.064100   -9999.000000
53665     53665     shanxi         111.6333       38.2667           87       167     2012      11        21        326              0.146583       1.390778       0.000000       0.225401       0.130000   -9999.000000       0.060900       0.362000
53665     53665     shanxi         111.6333       38.2667           87       167     2012      11        22        327              0.151333       2.593567       0.000000       0.240706   -9999.000000   -9999.000000       0.051600   -9999.000000
53665     53665     shanxi         111.6333       38.2667           87       167     2012      11        23        328              0.132125      -0.511383       0.000000       0.198077   -9999.000000       0.240800       0.058700       0.251000
53665     53665     shanxi         111.6333       38.2667           87       167     2012      11        24        329              0.121000      -2.948578       0.000000       0.162990   -9999.000000   -9999.000000       0.053800       0.231000
53665     53665     shanxi         111.6333       38.2667           87       167     2012      11        25        330              0.122833      -0.574219       0.000000       0.182469   -9999.000000   -9999.000000   -9999.000000       0.108000
53665     53665     shanxi         111.6333       38.2667           87       167     2012      11        26        331              0.119500      -2.155579       0.000000       0.165187   -9999.000000   -9999.000000   -9999.000000       0.101000
53665     53665     shanxi         111.6333       38.2667           87       167     2012      11        27        332              0.118625      -2.810822       0.000000       0.161808   -9999.000000   -9999.000000       0.052600   -9999.000000
53665     53665     shanxi         111.6333       38.2667           87       167     2012      11        28        333              0.117042      -1.584045       0.000000       0.176800   -9999.000000   -9999.000000       0.055900       0.144000
53665     53665     shanxi         111.6333       38.2667           87       167     2012      11        29        334              0.115000      -4.497711       0.321189       0.144774   -9999.000000   -9999.000000       0.055600       0.058000
53665     53665     shanxi         111.6333       38.2667           87       167     2012      11        30        335              0.114750      -3.731110       0.901867       0.155498   -9999.000000   -9999.000000       0.052600       0.179000
53665     53665     shanxi         111.6333       38.2667           87       167     2012      12        01        336              0.114958      -1.841431       0.000000       0.165051   -9999.000000   -9999.000000       0.051600       0.112000
53665     53665     shanxi         111.6333       38.2667           87       167     2012      12        02        337              0.114208      -3.342651       0.000000       0.153240   -9999.000000       0.100900       0.055500   -9999.000000
53665     53665     shanxi         111.6333       38.2667           87       167     2012      12        03        338              0.113375      -3.045258       0.000000       0.151625   -9999.000000       0.304200       0.052000       0.090000
53665     53665     shanxi         111.6333       38.2667           87       167     2012      12        04        339              0.114292      -5.653137       0.000000       0.134463   -9999.000000       0.064900       0.054100       0.066000
53665     53665     shanxi         111.6333       38.2667           87       167     2012      12        05        340              0.112708      -3.544525       0.000000       0.148812   -9999.000000   -9999.000000       0.049700       0.018000
53665     53665     shanxi         111.6333       38.2667           87       167     2012      12        06        341              0.112333      -7.074707       0.000000       0.125792   -9999.000000   -9999.000000   -9999.000000       0.010000
53665     53665     shanxi         111.6333       38.2667           87       167     2012      12        07        342              0.111833      -5.056183       0.217224       0.132303   -9999.000000   -9999.000000       0.050800   -9999.000000
53665     53665     shanxi         111.6333       38.2667           87       167     2012      12        08        343              0.110000      -7.276550       0.000000       0.125939   -9999.000000   -9999.000000       0.051000       0.043000
53665     53665     shanxi         111.6333       38.2667           87       167     2012      12        09        344              0.110250      -9.199371       0.000000       0.117166   -9999.000000   -9999.000000       0.048000       0.054000
53665     53665     shanxi         111.6333       38.2667           87       167     2012      12        10        345              0.110125      -5.501648       0.000000       0.134362   -9999.000000   -9999.000000       0.050500       0.045000
53665     53665     shanxi         111.6333       38.2667           87       167     2012      12        11        346              0.109500      -5.077026       0.048264       0.142654   -9999.000000       0.086700       0.047300       0.015000
53665     53665     shanxi         111.6333       38.2667           87       167     2012      12        12        347              0.109125      -4.964844       0.200963       0.136844   -9999.000000   -9999.000000   -9999.000000   -9999.000000
53665     53665     shanxi         111.6333       38.2667           87       167     2012      12        13        348              0.110208      -4.684662       0.090876       0.138092   -9999.000000   -9999.000000       0.049800       0.028000
53665     53665     shanxi         111.6333       38.2667           87       167     2012      12        14        349              0.111583      -4.510101       0.000000       0.128163   -9999.000000   -9999.000000       0.045500       0.044000
53665     53665     shanxi         111.6333       38.2667           87       167     2012      12        15        350              0.000000      -3.641724       0.000000       0.141999   -9999.000000       0.103300       0.053500       0.014000
53665     53665     shanxi         111.6333       38.2667           87       167     2012      12        16        351              0.113917      -2.778564       0.000000       0.145206   -9999.000000   -9999.000000       0.048600       0.093000
53665     53665     shanxi         111.6333       38.2667           87       167     2012      12        17        352              0.111958      -2.585022       0.000000       0.151954   -9999.000000       0.067500       0.040200   -9999.000000
53665     53665     shanxi         111.6333       38.2667           87       167     2012      12        18        353              0.110000      -6.034882       0.000000       0.135837   -9999.000000   -9999.000000       0.040800       0.013000
53665     53665     shanxi         111.6333       38.2667           87       167     2012      12        19        354              0.109500      -6.801025       0.000000       0.122768   -9999.000000   -9999.000000       0.046200       0.007000
53665     53665     shanxi         111.6333       38.2667           87       167     2012      12        20        355              0.000000      -6.268097       0.000000       0.120070   -9999.000000   -9999.000000       0.038500       0.033000
53665     53665     shanxi         111.6333       38.2667           87       167     2012      12        21        356              0.111000      -5.903778       0.000000       0.121358   -9999.000000   -9999.000000       0.041200       0.003000
53665     53665     shanxi         111.6333       38.2667           87       167     2012      12        22        357              0.110542      -8.154938       0.000000       0.119753   -9999.000000   -9999.000000       0.036900       0.017000
53665     53665     shanxi         111.6333       38.2667           87       167     2012      12        23        358              0.108583     -13.006012       0.000000       0.115366   -9999.000000   -9999.000000   -9999.000000       0.033000
53665     53665     shanxi         111.6333       38.2667           87       167     2012      12        24        359              0.108095     -14.126099       0.000000       0.111804   -9999.000000   -9999.000000       0.039000       0.071000
53665     53665     shanxi         111.6333       38.2667           87       167     2012      12        25        360              0.108000     -11.028320       0.000000       0.112327   -9999.000000   -9999.000000       0.037800       0.011000
53665     53665     shanxi         111.6333       38.2667           87       167     2012      12        26        361              0.000000      -9.323212       0.000000       0.113173   -9999.000000   -9999.000000       0.037900   -9999.000000
53665     53665     shanxi         111.6333       38.2667           87       167     2012      12        27        362              0.108000      -8.305817       0.000000       0.116105   -9999.000000   -9999.000000       0.044600       0.046000
53665     53665     shanxi         111.6333       38.2667           87       167     2012      12        28        363              0.108000      -7.068298       0.000000       0.118692   -9999.000000   -9999.000000       0.034900       0.031000
53665     53665     shanxi         111.6333       38.2667           87       167     2012      12        29        364              0.000000      -8.396698       0.000000       0.115498   -9999.000000   -9999.000000   -9999.000000       0.034000
53665     53665     shanxi         111.6333       38.2667           87       167     2012      12        30        365              0.000000     -11.816711       0.000000       0.113728   -9999.000000   -9999.000000       0.039900       0.091000
53665     53665     shanxi         111.6333       38.2667           87       167     2012      12        31        366              0.108000      -9.868988       0.000000       0.114018   -9999.000000   -9999.000000       0.031100   -9999.000000
