# Supplementary material for: Research on Fusing Multisatellite Soil Moisture Data Based on Bayesian Model Averaging
Source: Hindawi journal article supplement (doi:10.1155/2018/9310838), 2018-06-25
Supplement: f1 [file 9310838.f1.zip › 2012_sm00-10cm_daily_ZDB_ZHY_53666_366days_allin.txt]

53666     53666     shanxi         111.9019       38.3400           87       168     2012      01        01        001              0.000000   -9999.000000       0.000000   -9999.000000   -9999.000000   -9999.000000       0.024600   -9999.000000
53666     53666     shanxi         111.9019       38.3400           87       168     2012      01        02        002              0.048333      -5.754761       0.000000       0.156001   -9999.000000   -9999.000000       0.019300       0.039000
53666     53666     shanxi         111.9019       38.3400           87       168     2012      01        03        003              0.000000      -8.202972       0.000000       0.146569   -9999.000000   -9999.000000   -9999.000000       0.058000
53666     53666     shanxi         111.9019       38.3400           87       168     2012      01        04        004              0.045000     -11.156189       0.000000       0.141929   -9999.000000   -9999.000000       0.022600   -9999.000000
53666     53666     shanxi         111.9019       38.3400           87       168     2012      01        05        005              0.044792     -10.890778       0.000000       0.139554   -9999.000000   -9999.000000       0.018400       0.063000
53666     53666     shanxi         111.9019       38.3400           87       168     2012      01        06        006              0.045417      -9.204346       0.000000       0.143202   -9999.000000   -9999.000000       0.027300       0.055000
53666     53666     shanxi         111.9019       38.3400           87       168     2012      01        07        007              0.046609      -7.989807       0.000000       0.145342   -9999.000000   -9999.000000       0.025200       0.040000
53666     53666     shanxi         111.9019       38.3400           87       168     2012      01        08        008              0.000000      -6.578064       0.000000       0.147452   -9999.000000   -9999.000000       0.023700       0.012000
53666     53666     shanxi         111.9019       38.3400           87       168     2012      01        09        009              0.045609      -6.796967       0.000000       0.155733   -9999.000000   -9999.000000   -9999.000000       0.011000
53666     53666     shanxi         111.9019       38.3400           87       168     2012      01        10        010              0.045167      -7.458954       0.000000       0.152243   -9999.000000   -9999.000000       0.024500       0.038000
53666     53666     shanxi         111.9019       38.3400           87       168     2012      01        11        011              0.044458      -8.237061       0.000000       0.148527   -9999.000000   -9999.000000       0.025600       0.035000
53666     53666     shanxi         111.9019       38.3400           87       168     2012      01        12        012              0.044667      -8.800385       0.000000       0.145726   -9999.000000   -9999.000000       0.028000       0.011000
53666     53666     shanxi         111.9019       38.3400           87       168     2012      01        13        013              0.045083      -7.454254       0.000000       0.154701   -9999.000000   -9999.000000       0.024900   -9999.000000
53666     53666     shanxi         111.9019       38.3400           87       168     2012      01        14        014              0.045292      -6.770081       0.000000       0.154963   -9999.000000   -9999.000000   -9999.000000       0.024000
53666     53666     shanxi         111.9019       38.3400           87       168     2012      01        15        015              0.045583      -6.679718       0.000000       0.153183   -9999.000000   -9999.000000       0.027400       0.037000
53666     53666     shanxi         111.9019       38.3400           87       168     2012      01        16        016              0.045500      -6.156860       0.000000       0.160143   -9999.000000   -9999.000000       0.021200       0.007000
53666     53666     shanxi         111.9019       38.3400           87       168     2012      01        17        017              0.000000      -7.024628       0.000000       0.150829   -9999.000000   -9999.000000       0.029700       0.087000
53666     53666     shanxi         111.9019       38.3400           87       168     2012      01        18        018              0.046625      -5.868835       0.000000       0.161766   -9999.000000   -9999.000000       0.028400   -9999.000000
53666     53666     shanxi         111.9019       38.3400           87       168     2012      01        19        019              0.048917      -5.569672       0.000000       0.163546   -9999.000000   -9999.000000       0.023900       0.005000
53666     53666     shanxi         111.9019       38.3400           87       168     2012      01        20        020              0.049917      -3.435791       0.000000       0.174969   -9999.000000   -9999.000000   -9999.000000       0.024000
53666     53666     shanxi         111.9019       38.3400           87       168     2012      01        21        021              0.047750      -6.595581       0.000000       0.154225   -9999.000000   -9999.000000       0.021500       0.016000
53666     53666     shanxi         111.9019       38.3400           87       168     2012      01        22        022              0.044958     -10.831482       0.000000       0.143721   -9999.000000   -9999.000000       0.014900       0.036000
53666     53666     shanxi         111.9019       38.3400           87       168     2012      01        23        023              0.043833     -12.793549       0.000000       0.138202   -9999.000000   -9999.000000       0.024000   -9999.000000
53666     53666     shanxi         111.9019       38.3400           87       168     2012      01        24        024              0.042917     -12.559235       0.000000       0.137491   -9999.000000   -9999.000000   -9999.000000       0.060000
53666     53666     shanxi         111.9019       38.3400           87       168     2012      01        25        025              0.042917     -11.946259       0.000000       0.137967   -9999.000000   -9999.000000       0.022100       0.015000
53666     53666     shanxi         111.9019       38.3400           87       168     2012      01        26        026              0.043708     -10.183716       0.000000       0.139828   -9999.000000   -9999.000000       0.027600       0.020000
53666     53666     shanxi         111.9019       38.3400           87       168     2012      01        27        027              0.044958      -8.388336       0.000000       0.150322   -9999.000000   -9999.000000       0.026200       0.013000
53666     53666     shanxi         111.9019       38.3400           87       168     2012      01        28        028              0.046292      -6.167908       0.000000       0.162269   -9999.000000   -9999.000000       0.020300   -9999.000000
53666     53666     shanxi         111.9019       38.3400           87       168     2012      01        29        029              0.046792      -5.700043       0.000000       0.165780   -9999.000000   -9999.000000       0.028200       0.038000
53666     53666     shanxi         111.9019       38.3400           87       168     2012      01        30        030              0.046417      -5.982269       0.000000       0.165285   -9999.000000   -9999.000000       0.026700       0.030000
53666     53666     shanxi         111.9019       38.3400           87       168     2012      01        31        031              0.048417      -5.738159       0.000000       0.165717   -9999.000000   -9999.000000   -9999.000000       0.047000
53666     53666     shanxi         111.9019       38.3400           87       168     2012      02        01        032              0.045292      -3.498444       0.000000       0.183196   -9999.000000   -9999.000000       0.028600       0.046000
53666     53666     shanxi         111.9019       38.3400           87       168     2012      02        02        033              0.043917      -8.694977       0.000000       0.150857   -9999.000000   -9999.000000       0.023800   -9999.000000
53666     53666     shanxi         111.9019       38.3400           87       168     2012      02        03        034              0.045125      -8.483582       0.000000       0.149339   -9999.000000   -9999.000000       0.029800       0.020000
53666     53666     shanxi         111.9019       38.3400           87       168     2012      02        04        035              0.047000      -6.584045       0.000000       0.160799   -9999.000000   -9999.000000       0.033600       0.035000
53666     53666     shanxi         111.9019       38.3400           87       168     2012      02        05        036              0.049375      -5.550903       0.000000       0.162208   -9999.000000   -9999.000000       0.030400       0.056000
53666     53666     shanxi         111.9019       38.3400           87       168     2012      02        06        037              0.045750      -2.958313       0.000000       0.182471   -9999.000000   -9999.000000   -9999.000000       0.014000
53666     53666     shanxi         111.9019       38.3400           87       168     2012      02        07        038              0.043292      -8.981873       0.000000       0.150051   -9999.000000   -9999.000000       0.032500       0.023000
53666     53666     shanxi         111.9019       38.3400           87       168     2012      02        08        039              0.043125      -9.819885       0.000000       0.141859   -9999.000000   -9999.000000       0.029500       0.063000
53666     53666     shanxi         111.9019       38.3400           87       168     2012      02        09        040              0.043500      -8.878845       0.000000       0.144976   -9999.000000   -9999.000000       0.035900       0.039000
53666     53666     shanxi         111.9019       38.3400           87       168     2012      02        10        041              0.044708      -8.759399       0.000000       0.145447   -9999.000000   -9999.000000       0.034900       0.037000
53666     53666     shanxi         111.9019       38.3400           87       168     2012      02        11        042              0.047458      -7.127747       0.000000       0.158983   -9999.000000   -9999.000000       0.035500   -9999.000000
53666     53666     shanxi         111.9019       38.3400           87       168     2012      02        12        043              0.047000      -3.784607       0.000000       0.175715   -9999.000000   -9999.000000   -9999.000000       0.002000
53666     53666     shanxi         111.9019       38.3400           87       168     2012      02        13        044              0.051083      -5.255188       0.000000       0.161024       0.088000   -9999.000000   -9999.000000       0.060000
53666     53666     shanxi         111.9019       38.3400           87       168     2012      02        14        045              0.052208      -1.874359       0.000000       0.193266   -9999.000000   -9999.000000       0.033800       0.197000
53666     53666     shanxi         111.9019       38.3400           87       168     2012      02        15        046              0.049875      -2.348511       0.000000       0.191537   -9999.000000   -9999.000000       0.040000       0.095000
53666     53666     shanxi         111.9019       38.3400           87       168     2012      02        16        047              0.047500      -4.225342       0.000000       0.179802   -9999.000000   -9999.000000       0.035200   -9999.000000
53666     53666     shanxi         111.9019       38.3400           87       168     2012      02        17        048              0.045625      -6.266693       0.000000       0.160017   -9999.000000   -9999.000000   -9999.000000       0.001000
53666     53666     shanxi         111.9019       38.3400           87       168     2012      02        18        049              0.045917      -7.753754       1.150331       0.152530   -9999.000000   -9999.000000       0.038100       0.032000
53666     53666     shanxi         111.9019       38.3400           87       168     2012      02        19        050              0.047750      -7.600433       0.000000       0.160717       0.086000   -9999.000000       0.036200       0.165000
53666     53666     shanxi         111.9019       38.3400           87       168     2012      02        20        051              0.052125      -4.102448       0.000000       0.179363       0.091000   -9999.000000       0.044300       0.120000
53666     53666     shanxi         111.9019       38.3400           87       168     2012      02        21        052              0.059250      -0.756439       0.000000       0.199910   -9999.000000       0.051000   -9999.000000   -9999.000000
53666     53666     shanxi         111.9019       38.3400           87       168     2012      02        22        053              0.067375       1.323792       0.000000       0.213865   -9999.000000   -9999.000000       0.049100       0.222000
53666     53666     shanxi         111.9019       38.3400           87       168     2012      02        23        054              0.069875       1.907349       0.000000       0.216086       0.076000       0.070200   -9999.000000       0.150000
53666     53666     shanxi         111.9019       38.3400           87       168     2012      02        24        055              0.070625       1.035583       0.000000       0.212914   -9999.000000   -9999.000000       0.041100       0.183000
53666     53666     shanxi         111.9019       38.3400           87       168     2012      02        25        056              0.061750      -0.469147       0.000000       0.205280   -9999.000000   -9999.000000       0.039400       0.046000
53666     53666     shanxi         111.9019       38.3400           87       168     2012      02        26        057              0.063750      -2.244293       0.000000       0.186578   -9999.000000   -9999.000000       0.044700   -9999.000000
53666     53666     shanxi         111.9019       38.3400           87       168     2012      02        27        058              0.067917      -1.581268       0.000000       0.195427   -9999.000000   -9999.000000   -9999.000000       0.126000
53666     53666     shanxi         111.9019       38.3400           87       168     2012      02        28        059              0.072625       0.397797       0.000000       0.204763       0.080000       0.074800   -9999.000000       0.123000
53666     53666     shanxi         111.9019       38.3400           87       168     2012      02        29        060              0.000000   -9999.000000       0.000000   -9999.000000       0.092000   -9999.000000   -9999.000000   -9999.000000
53666     53666     shanxi         111.9019       38.3400           87       168     2012      03        01        061              0.092833       1.139496       0.000000       0.210940       0.090000   -9999.000000       0.046900       0.187000
53666     53666     shanxi         111.9019       38.3400           87       168     2012      03        02        062              0.112917       1.358917       0.000000       0.218631   -9999.000000   -9999.000000       0.044500   -9999.000000
53666     53666     shanxi         111.9019       38.3400           87       168     2012      03        03        063              0.111208       2.228119       0.000000       0.225330   -9999.000000   -9999.000000       0.052500       0.086000
53666     53666     shanxi         111.9019       38.3400           87       168     2012      03        04        064              0.116000      -0.024017       0.000000       0.206924       0.096000       0.054300       0.054300       0.311000
53666     53666     shanxi         111.9019       38.3400           87       168     2012      03        05        065              0.124625       1.355316       0.411231       0.217414       0.104000   -9999.000000   -9999.000000       0.198000
53666     53666     shanxi         111.9019       38.3400           87       168     2012      03        06        066              0.106917      -0.504150       0.274630       0.203509       0.106000   -9999.000000       0.047000       0.024000
53666     53666     shanxi         111.9019       38.3400           87       168     2012      03        07        067              0.000000      -0.333527       0.000000       0.203204       0.102000       0.041200       0.045300       0.248000
53666     53666     shanxi         111.9019       38.3400           87       168     2012      03        08        068              0.118458       1.662018       0.000000       0.210755   -9999.000000   -9999.000000       0.053000       0.181000
53666     53666     shanxi         111.9019       38.3400           87       168     2012      03        09        069              0.139042       1.077118       0.000000       0.210646       0.112000   -9999.000000       0.061900       0.392000
53666     53666     shanxi         111.9019       38.3400           87       168     2012      03        10        070              0.128167       1.797974       0.000000       0.215195       0.095000       0.069200       0.053300       0.207000
53666     53666     shanxi         111.9019       38.3400           87       168     2012      03        11        071              0.112667       0.595581       0.000000       0.206396       0.098000   -9999.000000       0.048800   -9999.000000
53666     53666     shanxi         111.9019       38.3400           87       168     2012      03        12        072              0.124833       1.286316       0.000000       0.204049       0.097000   -9999.000000       0.048200       0.288000
53666     53666     shanxi         111.9019       38.3400           87       168     2012      03        13        073              0.132125       1.987396       0.086317       0.208109   -9999.000000   -9999.000000       0.047300       0.156000
53666     53666     shanxi         111.9019       38.3400           87       168     2012      03        14        074              0.153500       3.228546       0.000000       0.210359   -9999.000000   -9999.000000   -9999.000000       0.317000
53666     53666     shanxi         111.9019       38.3400           87       168     2012      03        15        075              0.147875       5.537048       0.000000       0.221342   -9999.000000   -9999.000000       0.060000       0.395000
53666     53666     shanxi         111.9019       38.3400           87       168     2012      03        16        076              0.170292       2.517029       0.000000       0.221640       0.098000   -9999.000000   -9999.000000   -9999.000000
53666     53666     shanxi         111.9019       38.3400           87       168     2012      03        17        077              0.177250       6.115082       0.021318       0.224779       0.094000   -9999.000000       0.052900       0.553000
53666     53666     shanxi         111.9019       38.3400           87       168     2012      03        18        078              0.177625       7.543304       0.000000       0.227362   -9999.000000   -9999.000000       0.055300       0.435000
53666     53666     shanxi         111.9019       38.3400           87       168     2012      03        19        079              0.177250       5.384216       0.000000       0.225621   -9999.000000   -9999.000000       0.056600       0.581000
53666     53666     shanxi         111.9019       38.3400           87       168     2012      03        20        080              0.178750       3.819946       0.000000       0.225091       0.100000       0.075700       0.067300       0.324000
53666     53666     shanxi         111.9019       38.3400           87       168     2012      03        21        081              0.172917       6.900665       0.000000       0.225956       0.101000   -9999.000000       0.071200   -9999.000000
53666     53666     shanxi         111.9019       38.3400           87       168     2012      03        22        082              0.182583       3.197266       1.471069       0.224120       0.120000   -9999.000000   -9999.000000       0.651000
53666     53666     shanxi         111.9019       38.3400           87       168     2012      03        23        083              0.174083       3.891632       0.000000       0.224416   -9999.000000   -9999.000000       0.054100       0.365000
53666     53666     shanxi         111.9019       38.3400           87       168     2012      03        24        084              0.168625       3.009247       0.561735       0.212388   -9999.000000   -9999.000000   -9999.000000       0.527000
53666     53666     shanxi         111.9019       38.3400           87       168     2012      03        25        085              0.000000       6.436005       0.000000       0.214196       0.099000   -9999.000000       0.063600       0.302000
53666     53666     shanxi         111.9019       38.3400           87       168     2012      03        26        086              0.170708       7.638702       0.893953       0.212060       0.090000   -9999.000000       0.066700   -9999.000000
53666     53666     shanxi         111.9019       38.3400           87       168     2012      03        27        087              0.172583       8.772369       1.167301       0.209650       0.093000   -9999.000000       0.072200       0.514000
53666     53666     shanxi         111.9019       38.3400           87       168     2012      03        28        088              0.173875      10.282257       0.120889       0.207490       0.097000       0.089800       0.072300       0.483000
53666     53666     shanxi         111.9019       38.3400           87       168     2012      03        29        089              0.174667      11.897217       0.000000       0.206183   -9999.000000   -9999.000000       0.056600       0.670000
53666     53666     shanxi         111.9019       38.3400           87       168     2012      03        30        090              0.169042      10.859222       0.348460       0.203198   -9999.000000   -9999.000000       0.060500       0.314000
53666     53666     shanxi         111.9019       38.3400           87       168     2012      03        31        091              0.169500       6.261871       0.000000       0.202023       0.086000   -9999.000000       0.063500   -9999.000000
53666     53666     shanxi         111.9019       38.3400           87       168     2012      04        01        092              0.171125       9.187927       0.000000       0.202444       0.095000   -9999.000000       0.070600       0.401000
53666     53666     shanxi         111.9019       38.3400           87       168     2012      04        02        093              0.165375      12.007874       0.036905       0.199085       0.093000       0.184800   -9999.000000       0.308000
53666     53666     shanxi         111.9019       38.3400           87       168     2012      04        03        094              0.165333       5.585297       0.000000       0.195609   -9999.000000   -9999.000000       0.056900       0.347000
53666     53666     shanxi         111.9019       38.3400           87       168     2012      04        04        095              0.166292       8.614868       0.334238       0.194880   -9999.000000   -9999.000000       0.053600       0.261000
53666     53666     shanxi         111.9019       38.3400           87       168     2012      04        05        096              0.166333      11.019684       0.309999       0.192930       0.088000   -9999.000000       0.058200       0.370000
53666     53666     shanxi         111.9019       38.3400           87       168     2012      04        06        097              0.166667      11.058350       0.058608       0.190298       0.092000       0.119900       0.054500       0.285000
53666     53666     shanxi         111.9019       38.3400           87       168     2012      04        07        098              0.167667      11.675659       0.000000       0.187318       0.091000       0.200500       0.063300       0.475000
53666     53666     shanxi         111.9019       38.3400           87       168     2012      04        08        099              0.168583      12.990662       0.000000       0.185203       0.086000   -9999.000000   -9999.000000       0.307000
53666     53666     shanxi         111.9019       38.3400           87       168     2012      04        09        100              0.168500      15.072876       0.000000       0.182601       0.092000       0.261500       0.058200   -9999.000000
53666     53666     shanxi         111.9019       38.3400           87       168     2012      04        10        101              0.166208      15.991760       0.628147       0.181409       0.097000   -9999.000000       0.063100       0.322000
53666     53666     shanxi         111.9019       38.3400           87       168     2012      04        11        102              0.173000      13.299866       0.633050       0.191126       0.084000   -9999.000000       0.068600       0.800000
53666     53666     shanxi         111.9019       38.3400           87       168     2012      04        12        103              0.180917       9.768738       0.027251       0.198233       0.101000       0.104600       0.070200       0.732000
53666     53666     shanxi         111.9019       38.3400           87       168     2012      04        13        104              0.178000      11.018097       0.000000       0.198089       0.086500   -9999.000000       0.065700       0.338000
53666     53666     shanxi         111.9019       38.3400           87       168     2012      04        14        105              0.176292      13.218018       0.000000       0.190459       0.085000       0.055200       0.064600   -9999.000000
53666     53666     shanxi         111.9019       38.3400           87       168     2012      04        15        106              0.174542      14.533569       0.000000       0.184753       0.082500       0.085500       0.055400       0.396000
53666     53666     shanxi         111.9019       38.3400           87       168     2012      04        16        107              0.172167      15.781525       0.000000       0.180615       0.076500   -9999.000000       0.061300       0.273000
53666     53666     shanxi         111.9019       38.3400           87       168     2012      04        17        108              0.171375      14.946533       0.000000       0.177815       0.083000       0.046600       0.055400       0.505000
53666     53666     shanxi         111.9019       38.3400           87       168     2012      04        18        109              0.171250      17.123413       4.218393       0.176930       0.080000   -9999.000000   -9999.000000       0.313000
53666     53666     shanxi         111.9019       38.3400           87       168     2012      04        19        110              0.167875      16.180634       0.000000       0.217193       0.085000   -9999.000000   -9999.000000   -9999.000000
53666     53666     shanxi         111.9019       38.3400           87       168     2012      04        20        111              0.167083      14.546326       1.392993       0.216054   -9999.000000       0.158800       0.063900       0.321000
53666     53666     shanxi         111.9019       38.3400           87       168     2012      04        21        112              0.169042      15.114777       0.000000       0.208967       0.075500       0.365200       0.062000       0.326000
53666     53666     shanxi         111.9019       38.3400           87       168     2012      04        22        113              0.169750      16.202057       0.000000       0.206979       0.082000       0.111300       0.063200       0.380000
53666     53666     shanxi         111.9019       38.3400           87       168     2012      04        23        114              0.183125      19.288025      18.565945       0.189775       0.080000   -9999.000000       0.054500       0.246000
53666     53666     shanxi         111.9019       38.3400           87       168     2012      04        24        115              0.235667      22.499176       1.210986       0.237824   -9999.000000   -9999.000000       0.096300   -9999.000000
53666     53666     shanxi         111.9019       38.3400           87       168     2012      04        25        116              0.000000      12.109253       0.000000       0.301617   -9999.000000       0.330300   -9999.000000       0.601000
53666     53666     shanxi         111.9019       38.3400           87       168     2012      04        26        117              0.201833      10.923615       0.000000       0.271535       0.086000   -9999.000000       0.062100       0.370000
53666     53666     shanxi         111.9019       38.3400           87       168     2012      04        27        118              0.196500      16.187042       0.000000       0.252668       0.080000       0.280200   -9999.000000       0.437000
53666     53666     shanxi         111.9019       38.3400           87       168     2012      04        28        119              0.193000      16.264160       0.000000       0.236649       0.076000   -9999.000000       0.056300       0.254000
53666     53666     shanxi         111.9019       38.3400           87       168     2012      04        29        120              0.191125      18.454346       0.000000       0.222359       0.083000       0.370900       0.061500   -9999.000000
53666     53666     shanxi         111.9019       38.3400           87       168     2012      04        30        121              0.190250      21.045593       0.125065       0.208804       0.087000       0.073300   -9999.000000       0.254000
53666     53666     shanxi         111.9019       38.3400           87       168     2012      05        01        122              0.182875      22.827118       0.661223       0.199553       0.096000   -9999.000000       0.076600       0.317000
53666     53666     shanxi         111.9019       38.3400           87       168     2012      05        02        123              0.184250      17.609467       0.000000       0.207159       0.084000       0.118100       0.062500       0.398000
53666     53666     shanxi         111.9019       38.3400           87       168     2012      05        03        124              0.181333      21.790222       0.059796       0.197293       0.082000       0.216300       0.065700       0.183000
53666     53666     shanxi         111.9019       38.3400           87       168     2012      05        04        125              0.179875      22.166199       0.225946       0.189408       0.084500   -9999.000000       0.057300       0.154000
53666     53666     shanxi         111.9019       38.3400           87       168     2012      05        05        126              0.177708      22.816223       0.000000       0.184666       0.081000   -9999.000000       0.061700       0.209000
53666     53666     shanxi         111.9019       38.3400           87       168     2012      05        06        127              0.176417      23.494049       0.000000       0.180247       0.083500   -9999.000000   -9999.000000       0.446000
53666     53666     shanxi         111.9019       38.3400           87       168     2012      05        07        128              0.174375      24.917145       0.210745       0.178281   -9999.000000       0.088700       0.068300       0.288000
53666     53666     shanxi         111.9019       38.3400           87       168     2012      05        08        129              0.175458      23.327789       0.581768       0.180126       0.080000       0.050600       0.062700   -9999.000000
53666     53666     shanxi         111.9019       38.3400           87       168     2012      05        09        130              0.184542      24.691345       6.053438       0.182412       0.084000       0.300000       0.081200       0.867000
53666     53666     shanxi         111.9019       38.3400           87       168     2012      05        10        131              0.185750      20.111847       1.397588       0.254111       0.091000       0.092200       0.068600       0.311000
53666     53666     shanxi         111.9019       38.3400           87       168     2012      05        11        132              0.180875      23.859192       1.966122       0.224674       0.133000   -9999.000000       0.090100       0.854000
53666     53666     shanxi         111.9019       38.3400           87       168     2012      05        12        133              0.176583      17.523285       0.000000       0.251855       0.102000   -9999.000000   -9999.000000       0.232000
53666     53666     shanxi         111.9019       38.3400           87       168     2012      05        13        134              0.172708      16.244019       0.000000       0.223902       0.095000   -9999.000000       0.068000   -9999.000000
53666     53666     shanxi         111.9019       38.3400           87       168     2012      05        14        135              0.170500      16.161407       0.000000       0.208086       0.098000   -9999.000000       0.077500       0.192000
53666     53666     shanxi         111.9019       38.3400           87       168     2012      05        15        136              0.169333      16.441498       0.000000       0.196371       0.099000       0.122100       0.068500       0.180000
53666     53666     shanxi         111.9019       38.3400           87       168     2012      05        16        137              0.168333      18.330414       0.000000       0.187952       0.095000   -9999.000000       0.076000       0.359000
53666     53666     shanxi         111.9019       38.3400           87       168     2012      05        17        138              0.170417      18.890289       0.000000       0.182587       0.094500   -9999.000000       0.073800       0.182000
53666     53666     shanxi         111.9019       38.3400           87       168     2012      05        18        139              0.172125      22.189423       0.184321       0.178178       0.108000   -9999.000000       0.077300   -9999.000000
53666     53666     shanxi         111.9019       38.3400           87       168     2012      05        19        140              0.172292      25.181519       0.069808       0.176681       0.101000   -9999.000000       0.074900       0.230000
53666     53666     shanxi         111.9019       38.3400           87       168     2012      05        20        141              0.171167      25.649750       0.823215       0.175752   -9999.000000       0.136800       0.073100       0.261000
53666     53666     shanxi         111.9019       38.3400           87       168     2012      05        21        142              0.162958      25.209351       2.234292       0.177144       0.173000       0.061200       0.091600       0.339000
53666     53666     shanxi         111.9019       38.3400           87       168     2012      05        22        143              0.167125      16.684113       0.000000       0.210913       0.129000   -9999.000000       0.077500       0.119000
53666     53666     shanxi         111.9019       38.3400           87       168     2012      05        23        144              0.166500      19.409790       0.040704       0.201023   -9999.000000   -9999.000000   -9999.000000   -9999.000000
53666     53666     shanxi         111.9019       38.3400           87       168     2012      05        24        145              0.167750      19.552856       0.000000       0.186129       0.134000   -9999.000000       0.077700       0.228000
53666     53666     shanxi         111.9019       38.3400           87       168     2012      05        25        146              0.000000      20.897766       0.215572       0.178479       0.116000       0.153100       0.081200       0.196000
53666     53666     shanxi         111.9019       38.3400           87       168     2012      05        26        147              0.167583      20.844421       0.115826       0.176753       0.126000       0.036400       0.070200       0.252000
53666     53666     shanxi         111.9019       38.3400           87       168     2012      05        27        148              0.168167      23.638489       0.000000       0.173017       0.137500       0.198200       0.071800       0.179000
53666     53666     shanxi         111.9019       38.3400           87       168     2012      05        28        149              0.171458      25.353149      10.085335       0.170147       0.117000       0.072000       0.073800   -9999.000000
53666     53666     shanxi         111.9019       38.3400           87       168     2012      05        29        150              0.206625      25.219849       1.091086       0.202283       0.150000   -9999.000000   -9999.000000       0.259000
53666     53666     shanxi         111.9019       38.3400           87       168     2012      05        30        151              0.194583      20.201202       1.280668       0.262801       0.124000   -9999.000000       0.083900   -9999.000000
53666     53666     shanxi         111.9019       38.3400           87       168     2012      05        31        152              0.225292      20.886078      19.066692       0.230063       0.190000   -9999.000000   -9999.000000   -9999.000000
53666     53666     shanxi         111.9019       38.3400           87       168     2012      06        01        153              0.233583      18.544250       0.333152       0.324436       0.185000   -9999.000000       0.098300       0.599000
53666     53666     shanxi         111.9019       38.3400           87       168     2012      06        02        154              0.213542      19.082947       2.984112       0.301044       0.172500       0.125300       0.090900       0.616000
53666     53666     shanxi         111.9019       38.3400           87       168     2012      06        03        155              0.210542      20.393311       4.383511       0.283626       0.222000   -9999.000000       0.112500       0.870000
53666     53666     shanxi         111.9019       38.3400           87       168     2012      06        04        156              0.207875      19.030426       0.000000       0.303487       0.147000   -9999.000000       0.117000       0.650000
53666     53666     shanxi         111.9019       38.3400           87       168     2012      06        05        157              0.200542      21.910095       0.213175       0.271466       0.163000   -9999.000000       0.109400       0.310000
53666     53666     shanxi         111.9019       38.3400           87       168     2012      06        06        158              0.194458      22.666473       1.396140       0.253284       0.178000   -9999.000000       0.109700   -9999.000000
53666     53666     shanxi         111.9019       38.3400           87       168     2012      06        07        159              0.189917      20.830139       3.945961       0.257734       0.176000       0.116700       0.109100       0.354000
53666     53666     shanxi         111.9019       38.3400           87       168     2012      06        08        160              0.195250      19.627441       0.000000       0.271739       0.172500       0.137000       0.106100       0.294000
53666     53666     shanxi         111.9019       38.3400           87       168     2012      06        09        161              0.193333      21.846588       0.165143       0.257053       0.148000   -9999.000000   -9999.000000       0.326000
53666     53666     shanxi         111.9019       38.3400           87       168     2012      06        10        162              0.185833      23.256866       0.000000       0.236270       0.136000   -9999.000000       0.099800       0.212000
53666     53666     shanxi         111.9019       38.3400           87       168     2012      06        11        163              0.000000      20.699066       0.000000       0.219400       0.160000   -9999.000000       0.111200   -9999.000000
53666     53666     shanxi         111.9019       38.3400           87       168     2012      06        12        164              0.179000      21.912262       0.000000       0.205869       0.162000   -9999.000000       0.102900       0.263000
53666     53666     shanxi         111.9019       38.3400           87       168     2012      06        13        165              0.177458      23.328003       0.028349       0.196650       0.159000       0.105600       0.103300       0.239000
53666     53666     shanxi         111.9019       38.3400           87       168     2012      06        14        166              0.173792      24.075897       0.067521       0.190596       0.170000   -9999.000000       0.107500       0.332000
53666     53666     shanxi         111.9019       38.3400           87       168     2012      06        15        167              0.173000      21.736115       0.000000       0.188282       0.184000   -9999.000000       0.110500       0.207000
53666     53666     shanxi         111.9019       38.3400           87       168     2012      06        16        168              0.172625      22.987518       0.000000       0.185285       0.166000   -9999.000000       0.107700   -9999.000000
53666     53666     shanxi         111.9019       38.3400           87       168     2012      06        17        169              0.171667      25.211853       0.000000       0.181082       0.159000       0.046200       0.111200       0.280000
53666     53666     shanxi         111.9019       38.3400           87       168     2012      06        18        170              0.169750      27.499512       0.000000       0.177915       0.180000   -9999.000000       0.100500       0.308000
53666     53666     shanxi         111.9019       38.3400           87       168     2012      06        19        171              0.164333      28.481415       2.752242       0.176253   -9999.000000   -9999.000000       0.120800       0.320000
53666     53666     shanxi         111.9019       38.3400           87       168     2012      06        20        172              0.163417      23.783997       0.040816       0.205456       0.172000       0.235500   -9999.000000       0.243000
53666     53666     shanxi         111.9019       38.3400           87       168     2012      06        21        173              0.163292      24.437592       4.050305       0.197375   -9999.000000   -9999.000000       0.129000   -9999.000000
53666     53666     shanxi         111.9019       38.3400           87       168     2012      06        22        174              0.165458      25.655396       3.500485       0.206855       0.229000       0.249400       0.122500       0.608000
53666     53666     shanxi         111.9019       38.3400           87       168     2012      06        23        175              0.175333      26.084900      11.697911       0.243951       0.227000       0.139500       0.131700       0.515000
53666     53666     shanxi         111.9019       38.3400           87       168     2012      06        24        176              0.198208      24.940826       1.837551       0.273117       0.226000   -9999.000000       0.130300       0.956000
53666     53666     shanxi         111.9019       38.3400           87       168     2012      06        25        177              0.189833      22.075500       0.244003       0.287626       0.201000       0.225100       0.131400       0.518000
53666     53666     shanxi         111.9019       38.3400           87       168     2012      06        26        178              0.178958      24.188721       0.351865       0.262808       0.207000       0.129000   -9999.000000   -9999.000000
53666     53666     shanxi         111.9019       38.3400           87       168     2012      06        27        179              0.181583      23.126312      10.641477       0.251483       0.220000   -9999.000000       0.144500       0.900000
53666     53666     shanxi         111.9019       38.3400           87       168     2012      06        28        180              0.284583      20.451569      37.768318       0.281680       0.277000       0.197800       0.133300       1.000000
53666     53666     shanxi         111.9019       38.3400           87       168     2012      06        29        181              0.262542      18.943420       0.664349       0.364671       0.227500   -9999.000000       0.152000       1.000000
53666     53666     shanxi         111.9019       38.3400           87       168     2012      06        30        182              0.233333      21.361786       0.000000       0.347100       0.206000       0.382000       0.131000   -9999.000000
53666     53666     shanxi         111.9019       38.3400           87       168     2012      07        01        183              0.215417      23.828705       0.460259       0.319130       0.184000       0.202400       0.120900       0.850000
53666     53666     shanxi         111.9019       38.3400           87       168     2012      07        02        184              0.200708      25.229797       0.000000       0.303668       0.198000       0.327000       0.115200       0.372000
53666     53666     shanxi         111.9019       38.3400           87       168     2012      07        03        185              0.202500      25.667786       9.276112       0.287587       0.193500   -9999.000000       0.131000       0.566000
53666     53666     shanxi         111.9019       38.3400           87       168     2012      07        04        186              0.217292      24.480225       2.259955       0.309157       0.187000   -9999.000000       0.130400       0.684000
53666     53666     shanxi         111.9019       38.3400           87       168     2012      07        05        187              0.203750      23.026398       0.343471       0.313280       0.179000       0.058000       0.112100   -9999.000000
53666     53666     shanxi         111.9019       38.3400           87       168     2012      07        06        188              0.188583      25.352783       0.354972       0.298069   -9999.000000       0.149200       0.119300       0.704000
53666     53666     shanxi         111.9019       38.3400           87       168     2012      07        07        189              0.178792      26.212769       0.117431       0.283435   -9999.000000   -9999.000000   -9999.000000       0.464000
53666     53666     shanxi         111.9019       38.3400           87       168     2012      07        08        190              0.185667      24.487762       7.130105       0.277421       0.235000   -9999.000000       0.131200       0.551000
53666     53666     shanxi         111.9019       38.3400           87       168     2012      07        09        191              0.232750      23.688171       6.268652       0.303797       0.215000   -9999.000000       0.103000       0.957000
53666     53666     shanxi         111.9019       38.3400           87       168     2012      07        10        192              0.232375      22.573273       0.568228       0.321994       0.177000   -9999.000000       0.098700   -9999.000000
53666     53666     shanxi         111.9019       38.3400           87       168     2012      07        11        193              0.207375      24.448486       0.579854       0.301645       0.190000       0.225600       0.091000       0.681000
53666     53666     shanxi         111.9019       38.3400           87       168     2012      07        12        194              0.199833      25.048645       0.077570       0.282740       0.216000   -9999.000000       0.088600       0.431000
53666     53666     shanxi         111.9019       38.3400           87       168     2012      07        13        195              0.223583      25.962250       6.471928       0.268319       0.218000       0.229100   -9999.000000       0.501000
53666     53666     shanxi         111.9019       38.3400           87       168     2012      07        14        196              0.254500      23.550629       5.149683       0.300213       0.194000       0.061300       0.101500       0.753000
53666     53666     shanxi         111.9019       38.3400           87       168     2012      07        15        197              0.254500      22.745422       2.145440       0.304204       0.223500   -9999.000000       0.097200   -9999.000000
53666     53666     shanxi         111.9019       38.3400           87       168     2012      07        16        198              0.229125      23.003845       0.050982       0.307871       0.208000       0.171400       0.124200       0.897000
53666     53666     shanxi         111.9019       38.3400           87       168     2012      07        17        199              0.197542      23.753754       0.000000       0.287880       0.203000   -9999.000000       0.120400       0.475000
53666     53666     shanxi         111.9019       38.3400           87       168     2012      07        18        200              0.178292      23.700531       0.000000       0.272521       0.206000       0.244300       0.122300       0.560000
53666     53666     shanxi         111.9019       38.3400           87       168     2012      07        19        201              0.173250      24.061615       0.000000       0.262212       0.199000       0.156000       0.118800       0.338000
53666     53666     shanxi         111.9019       38.3400           87       168     2012      07        20        202              0.172087      25.230194       9.763846       0.249371       0.160000       0.341000       0.133400   -9999.000000
53666     53666     shanxi         111.9019       38.3400           87       168     2012      07        21        203              0.244391      26.483582      22.225374       0.264112   -9999.000000       0.495800       0.136500       1.000000
53666     53666     shanxi         111.9019       38.3400           87       168     2012      07        22        204              0.215083      21.786591       0.000000       0.358828       0.263000   -9999.000000       0.134100       0.628000
53666     53666     shanxi         111.9019       38.3400           87       168     2012      07        23        205              0.197167      22.928802       0.118661       0.319359       0.246000   -9999.000000       0.154500       0.811000
53666     53666     shanxi         111.9019       38.3400           87       168     2012      07        24        206              0.191167      23.281586       2.160342       0.305969       0.260000       0.217000   -9999.000000       0.791000
53666     53666     shanxi         111.9019       38.3400           87       168     2012      07        25        207              0.188250      23.890930       0.322160       0.306366       0.244000   -9999.000000       0.153300   -9999.000000
53666     53666     shanxi         111.9019       38.3400           87       168     2012      07        26        208              0.215458      24.361359      19.645529       0.301360       0.265000       0.281900       0.123600       0.976000
53666     53666     shanxi         111.9019       38.3400           87       168     2012      07        27        209              0.252542      25.118500      23.291557       0.346440       0.256000   -9999.000000       0.170800       0.961000
53666     53666     shanxi         111.9019       38.3400           87       168     2012      07        28        210              0.243958      23.278778       1.763172       0.367732       0.182000       0.167700       0.172100       0.987000
53666     53666     shanxi         111.9019       38.3400           87       168     2012      07        29        211              0.215458      25.274750       0.000000       0.356167       0.253000   -9999.000000       0.161200       0.786000
53666     53666     shanxi         111.9019       38.3400           87       168     2012      07        30        212              0.248583      25.415405      40.814484       0.332353       0.266000   -9999.000000   -9999.000000       0.961000
53666     53666     shanxi         111.9019       38.3400           87       168     2012      07        31        213              0.246458      21.643402       4.561532       0.382799       0.279000       0.357900       0.181500       0.970000
53666     53666     shanxi         111.9019       38.3400           87       168     2012      08        01        214              0.230042      20.681183       0.789553       0.374543       0.304000   -9999.000000       0.180400       0.976000
53666     53666     shanxi         111.9019       38.3400           87       168     2012      08        02        215              0.217583      23.218018       0.000000       0.354873       0.308000       0.153700       0.183000       0.819000
53666     53666     shanxi         111.9019       38.3400           87       168     2012      08        03        216              0.204500      24.492523       0.000000       0.342095       0.301000       0.179300       0.180900   -9999.000000
53666     53666     shanxi         111.9019       38.3400           87       168     2012      08        04        217              0.192913      24.721924       0.000000       0.331960       0.278000   -9999.000000       0.166400       0.773000
53666     53666     shanxi         111.9019       38.3400           87       168     2012      08        05        218              0.184833      25.216522       0.331382       0.322560       0.279000   -9999.000000       0.172300       0.676000
53666     53666     shanxi         111.9019       38.3400           87       168     2012      08        06        219              0.187250      23.534821       0.187348       0.320632       0.274000       0.194000       0.172200       0.694000
53666     53666     shanxi         111.9019       38.3400           87       168     2012      08        07        220              0.187000      24.643188       0.206854       0.314985       0.259000   -9999.000000       0.167300       0.543000
53666     53666     shanxi         111.9019       38.3400           87       168     2012      08        08        221              0.183125      26.353912       0.987219       0.307887       0.310000       0.459800       0.170500   -9999.000000
53666     53666     shanxi         111.9019       38.3400           87       168     2012      08        09        222              0.181000      24.527618       0.254519       0.305905       0.286000   -9999.000000       0.170400       0.559000
53666     53666     shanxi         111.9019       38.3400           87       168     2012      08        10        223              0.176625      24.339233       0.000000       0.294272       0.251500   -9999.000000   -9999.000000       0.529000
53666     53666     shanxi         111.9019       38.3400           87       168     2012      08        11        224              0.188125      23.721985       5.355681       0.285949       0.276500       0.080500       0.180700       0.539000
53666     53666     shanxi         111.9019       38.3400           87       168     2012      08        12        225              0.200083      22.016022       0.214471       0.308262       0.273000       0.288200       0.176500       0.578000
53666     53666     shanxi         111.9019       38.3400           87       168     2012      08        13        226              0.189125      22.739319       0.641251       0.305482       0.251000   -9999.000000       0.168600   -9999.000000
53666     53666     shanxi         111.9019       38.3400           87       168     2012      08        14        227              0.205042      22.160370       5.264633       0.300303       0.307000   -9999.000000       0.182300       0.983000
53666     53666     shanxi         111.9019       38.3400           87       168     2012      08        15        228              0.198792      21.129761       0.000000       0.321341       0.288000       0.202200       0.170500       0.646000
53666     53666     shanxi         111.9019       38.3400           87       168     2012      08        16        229              0.187917      23.116180       0.330663       0.300690       0.250500       0.197000       0.164100       0.674000
53666     53666     shanxi         111.9019       38.3400           87       168     2012      08        17        230              0.190792      23.214783       7.102255       0.292842       0.316000   -9999.000000       0.163200       0.933000
53666     53666     shanxi         111.9019       38.3400           87       168     2012      08        18        231              0.206000      20.714569       3.693012       0.320613       0.305000       0.297700       0.175800   -9999.000000
53666     53666     shanxi         111.9019       38.3400           87       168     2012      08        19        232              0.198625      20.339233       0.000000       0.327675       0.281000   -9999.000000       0.168400       0.837000
53666     53666     shanxi         111.9019       38.3400           87       168     2012      08        20        233              0.187125      22.423889       0.257097       0.306776       0.282000       0.143400       0.173200       0.592000
53666     53666     shanxi         111.9019       38.3400           87       168     2012      08        21        234              0.176833      21.793488       0.000000       0.297540       0.242500       0.115700   -9999.000000       0.608000
53666     53666     shanxi         111.9019       38.3400           87       168     2012      08        22        235              0.170917      18.716705       0.000000       0.286802       0.238000       0.264100       0.167900   -9999.000000
53666     53666     shanxi         111.9019       38.3400           87       168     2012      08        23        236              0.167083      19.450165       0.000000       0.279453       0.226000       0.111900       0.169900   -9999.000000
53666     53666     shanxi         111.9019       38.3400           87       168     2012      08        24        237              0.164250      19.697876       0.000000       0.272500       0.211000       0.084800       0.174200       0.476000
53666     53666     shanxi         111.9019       38.3400           87       168     2012      08        25        238              0.000000      20.694031       0.000000       0.264947       0.274000       0.317900       0.163800       0.459000
53666     53666     shanxi         111.9019       38.3400           87       168     2012      08        26        239              0.160875      21.777313       0.000000       0.260191       0.245500       0.252400       0.171000       0.529000
53666     53666     shanxi         111.9019       38.3400           87       168     2012      08        27        240              0.158917      22.445892       1.950575       0.256051       0.250000   -9999.000000   -9999.000000       0.369000
53666     53666     shanxi         111.9019       38.3400           87       168     2012      08        28        241              0.156000      22.269318       0.277141       0.256693   -9999.000000   -9999.000000       0.151900       0.349000
53666     53666     shanxi         111.9019       38.3400           87       168     2012      08        29        242              0.152167      22.572876       0.000000       0.248853       0.242000       0.144900       0.159100       0.330000
53666     53666     shanxi         111.9019       38.3400           87       168     2012      08        30        243              0.147667      23.186981       0.000000       0.237740       0.235000       0.254200       0.144000       0.549000
53666     53666     shanxi         111.9019       38.3400           87       168     2012      08        31        244              0.146208      22.761932       5.593329       0.230899       0.261000       0.021600       0.147100       0.422000
53666     53666     shanxi         111.9019       38.3400           87       168     2012      09        01        245              0.260750      21.624725      43.463882       0.242037       0.274000   -9999.000000       0.169300   -9999.000000
53666     53666     shanxi         111.9019       38.3400           87       168     2012      09        02        246              0.226958      17.363373       0.000000       0.380979       0.302000       0.174200       0.174300       0.949000
53666     53666     shanxi         111.9019       38.3400           87       168     2012      09        03        247              0.207958      17.482025       0.059162       0.342739       0.273000       0.198200       0.163400       0.732000
53666     53666     shanxi         111.9019       38.3400           87       168     2012      09        04        248              0.196833      16.535980       1.365930       0.328307       0.280000       0.285800       0.162400       0.797000
53666     53666     shanxi         111.9019       38.3400           87       168     2012      09        05        249              0.190000      17.349609       4.403119       0.319805       0.258000       0.320600       0.162600       0.605000
53666     53666     shanxi         111.9019       38.3400           87       168     2012      09        06        250              0.189417      18.584717       2.790185       0.326623       0.258500   -9999.000000       0.163400   -9999.000000
53666     53666     shanxi         111.9019       38.3400           87       168     2012      09        07        251              0.187333      16.996399       0.000000       0.332021       0.247500       0.112800   -9999.000000       0.904000
53666     53666     shanxi         111.9019       38.3400           87       168     2012      09        08        252              0.180042      18.699677       0.000000       0.319591       0.254000       0.222100       0.158900       0.643000
53666     53666     shanxi         111.9019       38.3400           87       168     2012      09        09        253              0.173250      18.689514       0.000000       0.310240       0.238000   -9999.000000       0.157400       0.664000
53666     53666     shanxi         111.9019       38.3400           87       168     2012      09        10        254              0.168542      19.537567       0.652414       0.302043       0.258000       0.224700       0.123200       0.623000
53666     53666     shanxi         111.9019       38.3400           87       168     2012      09        11        255              0.165625      17.737976       0.000000       0.302625       0.223000       0.367800       0.113800   -9999.000000
53666     53666     shanxi         111.9019       38.3400           87       168     2012      09        12        256              0.157125      17.776276       0.099412       0.296838       0.213000       0.228300       0.119000       0.464000
53666     53666     shanxi         111.9019       38.3400           87       168     2012      09        13        257              0.155375      12.402466       1.076015       0.293988       0.217000       0.206400   -9999.000000       0.497000
53666     53666     shanxi         111.9019       38.3400           87       168     2012      09        14        258              0.154958      13.267853       0.000000       0.296452       0.202000   -9999.000000       0.115500       0.550000
53666     53666     shanxi         111.9019       38.3400           87       168     2012      09        15        259              0.154042      14.768860       2.474384       0.290810       0.220000       0.126800       0.122200       0.306000
53666     53666     shanxi         111.9019       38.3400           87       168     2012      09        16        260              0.152792      15.890656       0.000000       0.286313       0.206000       0.189100       0.112700   -9999.000000
53666     53666     shanxi         111.9019       38.3400           87       168     2012      09        17        261              0.150792      16.070587       0.751679       0.282924       0.207000       0.361400       0.091400       0.433000
53666     53666     shanxi         111.9019       38.3400           87       168     2012      09        18        262              0.149333      16.774872       0.889991       0.282446       0.210000       0.089200       0.099000       0.536000
53666     53666     shanxi         111.9019       38.3400           87       168     2012      09        19        263              0.149125      16.047028       0.742843       0.284707       0.208000   -9999.000000       0.093700       0.583000
53666     53666     shanxi         111.9019       38.3400           87       168     2012      09        20        264              0.149042      16.600616       5.607277       0.277898       0.200000       0.150500       0.101400       0.370000
53666     53666     shanxi         111.9019       38.3400           87       168     2012      09        21        265              0.185833      17.730103       5.478063       0.284315   -9999.000000       0.259900       0.103400   -9999.000000
53666     53666     shanxi         111.9019       38.3400           87       168     2012      09        22        266              0.183917      14.372314       0.000000       0.325482       0.206000       0.302200       0.102100       0.684000
53666     53666     shanxi         111.9019       38.3400           87       168     2012      09        23        267              0.174958      16.865234       0.000000       0.305426       0.193500       0.344000       0.099400       0.596000
53666     53666     shanxi         111.9019       38.3400           87       168     2012      09        24        268              0.167458      18.083313       0.631702       0.295768       0.188000   -9999.000000   -9999.000000       0.470000
53666     53666     shanxi         111.9019       38.3400           87       168     2012      09        25        269              0.226667      17.704254      22.938206       0.292451   -9999.000000       0.126300       0.126700       0.827000
53666     53666     shanxi         111.9019       38.3400           87       168     2012      09        26        270              0.217375      12.635620       0.000000       0.360215       0.205000   -9999.000000       0.123800       0.884000
53666     53666     shanxi         111.9019       38.3400           87       168     2012      09        27        271              0.204714      14.854523       0.000000       0.332089   -9999.000000   -9999.000000       0.123000       0.590000
53666     53666     shanxi         111.9019       38.3400           87       168     2012      09        28        272              0.183733      12.547943       0.000000       0.320058       0.203000   -9999.000000       0.118800       0.665000
53666     53666     shanxi         111.9019       38.3400           87       168     2012      09        29        273              0.178375      11.443359       0.000000       0.313391       0.224000   -9999.000000       0.126800       0.404000
53666     53666     shanxi         111.9019       38.3400           87       168     2012      09        30        274              0.173250      11.675903       0.000000       0.308151       0.202000   -9999.000000   -9999.000000   -9999.000000
53666     53666     shanxi         111.9019       38.3400           87       168     2012      10        01        275              0.169167      12.127960       0.000000       0.303641       0.155000       0.165000       0.094700       0.463000
53666     53666     shanxi         111.9019       38.3400           87       168     2012      10        02        276              0.165625      13.115936       0.092850       0.299126       0.153000       0.293400       0.099300       0.445000
53666     53666     shanxi         111.9019       38.3400           87       168     2012      10        03        277              0.162000      14.288452       0.000000       0.296725       0.151500   -9999.000000       0.091900       0.512000
53666     53666     shanxi         111.9019       38.3400           87       168     2012      10        04        278              0.155792      14.350739       0.694902       0.291798       0.167000       0.077200       0.105200       0.527000
53666     53666     shanxi         111.9019       38.3400           87       168     2012      10        05        279              0.154583      10.782349       0.000000       0.297017       0.181000       0.209500   -9999.000000   -9999.000000
53666     53666     shanxi         111.9019       38.3400           87       168     2012      10        06        280              0.153125      11.208435       0.761914       0.292693       0.169000       0.308900       0.099200       0.492000
53666     53666     shanxi         111.9019       38.3400           87       168     2012      10        07        281              0.151625      12.725891       0.000000       0.288283       0.171000   -9999.000000       0.097800       0.393000
53666     53666     shanxi         111.9019       38.3400           87       168     2012      10        08        282              0.151000      13.056427       0.467735       0.287293       0.170000   -9999.000000       0.091200       0.526000
53666     53666     shanxi         111.9019       38.3400           87       168     2012      10        09        283              0.146333      14.366730       0.000000       0.286795       0.153000       0.163000       0.081600       0.245000
53666     53666     shanxi         111.9019       38.3400           87       168     2012      10        10        284              0.144000      10.676483       0.000000       0.282254       0.164000   -9999.000000       0.089700   -9999.000000
53666     53666     shanxi         111.9019       38.3400           87       168     2012      10        11        285              0.143375      10.528687       0.000000       0.279006       0.123000       0.195400   -9999.000000       0.448000
53666     53666     shanxi         111.9019       38.3400           87       168     2012      10        12        286              0.142292      11.589844       0.000000       0.276139       0.112000   -9999.000000       0.083700       0.379000
53666     53666     shanxi         111.9019       38.3400           87       168     2012      10        13        287              0.140875      11.789337       0.000000       0.272947       0.112000       0.278400       0.086800       0.385000
53666     53666     shanxi         111.9019       38.3400           87       168     2012      10        14        288              0.140708      12.013519       0.000000       0.270579       0.121500       0.046200       0.081300       0.310000
53666     53666     shanxi         111.9019       38.3400           87       168     2012      10        15        289              0.147833      12.478790      10.017558       0.269857   -9999.000000       0.396600       0.088300   -9999.000000
53666     53666     shanxi         111.9019       38.3400           87       168     2012      10        16        290              0.179292       9.576874       3.047314       0.304043       0.158000       0.277400       0.110800       0.842000
53666     53666     shanxi         111.9019       38.3400           87       168     2012      10        17        291              0.166958       6.887207       1.037624       0.309614       0.135000       0.192700       0.092800       0.468000
53666     53666     shanxi         111.9019       38.3400           87       168     2012      10        18        292              0.159625       6.144836       0.000000       0.305692   -9999.000000   -9999.000000       0.091000       0.707000
53666     53666     shanxi         111.9019       38.3400           87       168     2012      10        19        293              0.156792       6.550232       0.000000       0.297751       0.148000       0.045900       0.095100       0.374000
53666     53666     shanxi         111.9019       38.3400           87       168     2012      10        20        294              0.155667       8.473236       0.100686       0.294978       0.121500   -9999.000000       0.088600   -9999.000000
53666     53666     shanxi         111.9019       38.3400           87       168     2012      10        21        295              0.153250      10.685425       3.050610       0.291892       0.159000       0.144500       0.097500       0.697000
53666     53666     shanxi         111.9019       38.3400           87       168     2012      10        22        296              0.151750       5.559601       0.000000       0.308421   -9999.000000       0.197700   -9999.000000       0.465000
53666     53666     shanxi         111.9019       38.3400           87       168     2012      10        23        297              0.149042       5.920624       0.000000       0.293732   -9999.000000   -9999.000000       0.083500       0.464000
53666     53666     shanxi         111.9019       38.3400           87       168     2012      10        24        298              0.148792       6.682098       0.000000       0.294122   -9999.000000   -9999.000000       0.080100       0.294000
53666     53666     shanxi         111.9019       38.3400           87       168     2012      10        25        299              0.000000       7.949341       0.000000       0.291152       0.123000   -9999.000000       0.081700       0.412000
53666     53666     shanxi         111.9019       38.3400           87       168     2012      10        26        300              0.144000       8.668304       0.034416       0.288595       0.140000   -9999.000000       0.082700       0.372000
53666     53666     shanxi         111.9019       38.3400           87       168     2012      10        27        301              0.143500       6.801483       0.000000       0.289081       0.127000       0.194800       0.084800       0.526000
53666     53666     shanxi         111.9019       38.3400           87       168     2012      10        28        302              0.000000       7.710876       0.000000       0.284823       0.117000   -9999.000000   -9999.000000       0.359000
53666     53666     shanxi         111.9019       38.3400           87       168     2012      10        29        303              0.140250       8.841553       0.000000       0.284086   -9999.000000       0.201700       0.065900   -9999.000000
53666     53666     shanxi         111.9019       38.3400           87       168     2012      10        30        304              0.136292       6.594147       0.000000       0.270454       0.122000   -9999.000000       0.069000       0.246000
53666     53666     shanxi         111.9019       38.3400           87       168     2012      10        31        305              0.135583       4.358521       0.000000       0.271653       0.112000       0.186700       0.066800       0.259000
53666     53666     shanxi         111.9019       38.3400           87       168     2012      11        01        306              0.135125       5.014648       0.000000       0.265951       0.110000       0.133100       0.072000       0.406000
53666     53666     shanxi         111.9019       38.3400           87       168     2012      11        02        307              0.135875       5.390167       0.039599       0.267888       0.109000   -9999.000000       0.074400       0.305000
53666     53666     shanxi         111.9019       38.3400           87       168     2012      11        03        308              0.134000       7.448944       0.522329       0.274507   -9999.000000   -9999.000000       0.062600   -9999.000000
53666     53666     shanxi         111.9019       38.3400           87       168     2012      11        04        309              0.110125       0.512634       0.000000       0.227348   -9999.000000       0.003100       0.059800       0.407000
53666     53666     shanxi         111.9019       38.3400           87       168     2012      11        05        310              0.119833      -2.032471       0.000000       0.186244       0.140000       0.160800       0.058800       0.348000
53666     53666     shanxi         111.9019       38.3400           87       168     2012      11        06        311              0.135083       0.887604       0.053977       0.223696       0.139000       0.051600       0.070800       0.485000
53666     53666     shanxi         111.9019       38.3400           87       168     2012      11        07        312              0.135333       2.904602       0.353714       0.245832       0.127000   -9999.000000       0.074200       0.268000
53666     53666     shanxi         111.9019       38.3400           87       168     2012      11        08        313              0.131625       1.619202       0.000000       0.236485   -9999.000000   -9999.000000   -9999.000000   -9999.000000
53666     53666     shanxi         111.9019       38.3400           87       168     2012      11        09        314              0.132833       2.909332       0.726592       0.251577   -9999.000000       0.153800       0.067500       0.369000
53666     53666     shanxi         111.9019       38.3400           87       168     2012      11        10        315              0.130333       2.140778       0.085612       0.262414   -9999.000000       0.158700       0.054500       0.298000
53666     53666     shanxi         111.9019       38.3400           87       168     2012      11        11        316              0.101625      -0.386963       0.176551       0.220643   -9999.000000       0.131500       0.057900       0.259000
53666     53666     shanxi         111.9019       38.3400           87       168     2012      11        12        317              0.091375      -1.839203       0.000000       0.193574   -9999.000000   -9999.000000       0.057000       0.181000
53666     53666     shanxi         111.9019       38.3400           87       168     2012      11        13        318              0.000000      -0.514740       1.366588       0.208060       0.115000   -9999.000000       0.056200   -9999.000000
53666     53666     shanxi         111.9019       38.3400           87       168     2012      11        14        319              0.081208      -1.005035       0.000000       0.203906   -9999.000000   -9999.000000   -9999.000000       0.321000
53666     53666     shanxi         111.9019       38.3400           87       168     2012      11        15        320              0.078958       0.401093       0.000000       0.215496   -9999.000000   -9999.000000       0.052000       0.156000
53666     53666     shanxi         111.9019       38.3400           87       168     2012      11        16        321              0.075750      -0.471893       0.000000       0.202448       0.112000       0.075200       0.052900       0.201000
53666     53666     shanxi         111.9019       38.3400           87       168     2012      11        17        322              0.000000      -1.095947       0.000000       0.203785       0.131000   -9999.000000       0.062200       0.180000
53666     53666     shanxi         111.9019       38.3400           87       168     2012      11        18        323              0.080167       0.486450       0.457308       0.216051       0.129000   -9999.000000       0.060100   -9999.000000
53666     53666     shanxi         111.9019       38.3400           87       168     2012      11        19        324              0.080583       0.490723       0.000000       0.221150   -9999.000000   -9999.000000       0.063100       0.143000
53666     53666     shanxi         111.9019       38.3400           87       168     2012      11        20        325              0.087500       0.670380       0.000000       0.219836   -9999.000000   -9999.000000       0.061600       0.332000
53666     53666     shanxi         111.9019       38.3400           87       168     2012      11        21        326              0.113083       1.478546       0.000000       0.235925       0.120000   -9999.000000       0.060300       0.230000
53666     53666     shanxi         111.9019       38.3400           87       168     2012      11        22        327              0.109583       2.799988       0.000000       0.246944   -9999.000000   -9999.000000       0.054100       0.109000
53666     53666     shanxi         111.9019       38.3400           87       168     2012      11        23        328              0.081292      -0.323975       0.000000       0.216918   -9999.000000       0.094700       0.055800       0.217000
53666     53666     shanxi         111.9019       38.3400           87       168     2012      11        24        329              0.068125      -2.690704       0.000000       0.190381   -9999.000000   -9999.000000       0.059300       0.086000
53666     53666     shanxi         111.9019       38.3400           87       168     2012      11        25        330              0.066542      -0.654053       0.000000       0.202363   -9999.000000       0.316400   -9999.000000       0.115000
53666     53666     shanxi         111.9019       38.3400           87       168     2012      11        26        331              0.057417      -1.990631       0.000000       0.190494   -9999.000000   -9999.000000   -9999.000000       0.069000
53666     53666     shanxi         111.9019       38.3400           87       168     2012      11        27        332              0.055917      -2.757294       0.000000       0.188377       0.100000   -9999.000000       0.051200   -9999.000000
53666     53666     shanxi         111.9019       38.3400           87       168     2012      11        28        333              0.050333      -1.435303       0.000000       0.197718   -9999.000000   -9999.000000       0.052700       0.066000
53666     53666     shanxi         111.9019       38.3400           87       168     2012      11        29        334              0.045750      -4.152740       0.059436       0.173584   -9999.000000   -9999.000000       0.052800       0.041000
53666     53666     shanxi         111.9019       38.3400           87       168     2012      11        30        335              0.045667      -3.830841       1.026445       0.180337   -9999.000000   -9999.000000       0.051500       0.133000
53666     53666     shanxi         111.9019       38.3400           87       168     2012      12        01        336              0.045208      -2.215698       0.000000       0.185756   -9999.000000       0.267200   -9999.000000       0.147000
53666     53666     shanxi         111.9019       38.3400           87       168     2012      12        02        337              0.042417      -3.548615       0.000000       0.174851   -9999.000000       0.103100       0.050600   -9999.000000
53666     53666     shanxi         111.9019       38.3400           87       168     2012      12        03        338              0.039042      -2.963348       0.000000       0.175854   -9999.000000       0.174700       0.053500       0.002000
53666     53666     shanxi         111.9019       38.3400           87       168     2012      12        04        339              0.038833      -5.706329       0.000000       0.162022   -9999.000000       0.097600       0.053100       0.006000
53666     53666     shanxi         111.9019       38.3400           87       168     2012      12        05        340              0.034625      -3.220306       0.000000       0.177686   -9999.000000   -9999.000000       0.052400       0.008000
53666     53666     shanxi         111.9019       38.3400           87       168     2012      12        06        341              0.034167      -7.070862       0.000000       0.152622   -9999.000000   -9999.000000   -9999.000000       0.024000
53666     53666     shanxi         111.9019       38.3400           87       168     2012      12        07        342              0.032583      -4.658875       0.952272       0.161632   -9999.000000   -9999.000000       0.050400   -9999.000000
53666     53666     shanxi         111.9019       38.3400           87       168     2012      12        08        343              0.028167      -6.713440       0.000000       0.153730   -9999.000000   -9999.000000       0.051100       0.002000
53666     53666     shanxi         111.9019       38.3400           87       168     2012      12        09        344              0.029250      -8.913727       0.422437       0.144128       0.104000   -9999.000000       0.052300       0.017000
53666     53666     shanxi         111.9019       38.3400           87       168     2012      12        10        345              0.030708      -5.518127       0.260124       0.161827   -9999.000000   -9999.000000       0.048600       0.046000
53666     53666     shanxi         111.9019       38.3400           87       168     2012      12        11        346              0.029792      -4.850372       0.017467       0.172256   -9999.000000   -9999.000000       0.050200   -9999.000000
53666     53666     shanxi         111.9019       38.3400           87       168     2012      12        12        347              0.029167      -5.413177       0.341168       0.163512   -9999.000000   -9999.000000   -9999.000000   -9999.000000
53666     53666     shanxi         111.9019       38.3400           87       168     2012      12        13        348              0.030250      -5.546814       0.619727       0.160789   -9999.000000   -9999.000000       0.052300       0.044000
53666     53666     shanxi         111.9019       38.3400           87       168     2012      12        14        349              0.034125      -5.226593       0.000000       0.152857   -9999.000000   -9999.000000       0.046500       0.015000
53666     53666     shanxi         111.9019       38.3400           87       168     2012      12        15        350              0.000000      -3.624359       0.000000       0.168147   -9999.000000       0.115800       0.052800       0.038000
53666     53666     shanxi         111.9019       38.3400           87       168     2012      12        16        351              0.037958      -2.621429       0.000000       0.175460   -9999.000000   -9999.000000       0.050800       0.018000
53666     53666     shanxi         111.9019       38.3400           87       168     2012      12        17        352              0.033625      -2.695923       0.000000       0.181043   -9999.000000       0.018700       0.040700   -9999.000000
53666     53666     shanxi         111.9019       38.3400           87       168     2012      12        18        353              0.030083      -6.325378       0.000000       0.163639   -9999.000000   -9999.000000       0.039700       0.032000
53666     53666     shanxi         111.9019       38.3400           87       168     2012      12        19        354              0.029208      -7.339294       0.000000       0.147390   -9999.000000   -9999.000000       0.045900       0.002000
53666     53666     shanxi         111.9019       38.3400           87       168     2012      12        20        355              0.000000      -6.737762       0.000000       0.145706   -9999.000000       0.109400       0.040400       0.028000
53666     53666     shanxi         111.9019       38.3400           87       168     2012      12        21        356              0.030708      -6.280609       0.000000       0.146726   -9999.000000       0.414200       0.042100       0.022000
53666     53666     shanxi         111.9019       38.3400           87       168     2012      12        22        357              0.028083      -8.125702       0.000000       0.146348   -9999.000000   -9999.000000       0.037800       0.051000
53666     53666     shanxi         111.9019       38.3400           87       168     2012      12        23        358              0.025583     -12.408508       0.000000       0.142055   -9999.000000   -9999.000000   -9999.000000       0.012000
53666     53666     shanxi         111.9019       38.3400           87       168     2012      12        24        359              0.024571     -14.093872       0.000000       0.138122   -9999.000000   -9999.000000       0.043000       0.036000
53666     53666     shanxi         111.9019       38.3400           87       168     2012      12        25        360              0.024792     -10.848297       0.000000       0.138600   -9999.000000   -9999.000000       0.044600       0.021000
53666     53666     shanxi         111.9019       38.3400           87       168     2012      12        26        361              0.000000      -9.045044       0.000000       0.139562   -9999.000000   -9999.000000       0.042100   -9999.000000
53666     53666     shanxi         111.9019       38.3400           87       168     2012      12        27        362              0.025364      -8.254517       0.000000       0.144007   -9999.000000   -9999.000000       0.044900       0.001000
53666     53666     shanxi         111.9019       38.3400           87       168     2012      12        28        363              0.025000      -7.336975       0.000000       0.146479   -9999.000000   -9999.000000       0.043100       0.035000
53666     53666     shanxi         111.9019       38.3400           87       168     2012      12        29        364              0.000000      -8.107391       0.000000       0.142873   -9999.000000   -9999.000000   -9999.000000       0.038000
53666     53666     shanxi         111.9019       38.3400           87       168     2012      12        30        365              0.000000     -11.580139       0.000000       0.141041   -9999.000000   -9999.000000       0.041100   -9999.000000
53666     53666     shanxi         111.9019       38.3400           87       168     2012      12        31        366              0.023600     -10.136688       0.000000       0.140480   -9999.000000   -9999.000000       0.035300   -9999.000000
