# Supplementary material for: Research on Fusing Multisatellite Soil Moisture Data Based on Bayesian Model Averaging
Source: Hindawi journal article supplement (doi:10.1155/2018/9310838), 2018-06-25
Supplement: f1 [file 9310838.f1.zip › 2012_sm00-10cm_daily_ZDB_ZHY_53669_366days_allin.txt]

53669     53669     shanxi         111.8167       38.0667           88       167     2012      01        01        001              0.000000   -9999.000000       0.000000   -9999.000000   -9999.000000   -9999.000000       0.024900   -9999.000000
53669     53669     shanxi         111.8167       38.0667           88       167     2012      01        02        002              0.020417      -5.140198       0.000000       0.141534   -9999.000000   -9999.000000       0.020400       0.125000
53669     53669     shanxi         111.8167       38.0667           88       167     2012      01        03        003              0.000000      -8.073364       0.000000       0.130702   -9999.000000   -9999.000000   -9999.000000       0.068000
53669     53669     shanxi         111.8167       38.0667           88       167     2012      01        04        004              0.017458     -10.947968       0.000000       0.124663   -9999.000000   -9999.000000       0.026300   -9999.000000
53669     53669     shanxi         111.8167       38.0667           88       167     2012      01        05        005              0.017458      -9.912262       0.000000       0.123455   -9999.000000   -9999.000000       0.022200       0.062000
53669     53669     shanxi         111.8167       38.0667           88       167     2012      01        06        006              0.017542      -8.234131       0.000000       0.127199   -9999.000000   -9999.000000       0.028500       0.063000
53669     53669     shanxi         111.8167       38.0667           88       167     2012      01        07        007              0.018583      -7.223907       0.000000       0.129561   -9999.000000   -9999.000000       0.023900       0.052000
53669     53669     shanxi         111.8167       38.0667           88       167     2012      01        08        008              0.000000      -5.818909       0.000000       0.132594   -9999.000000   -9999.000000       0.023000       0.025000
53669     53669     shanxi         111.8167       38.0667           88       167     2012      01        09        009              0.018833      -5.748718       0.000000       0.142565   -9999.000000   -9999.000000   -9999.000000       0.058000
53669     53669     shanxi         111.8167       38.0667           88       167     2012      01        10        010              0.018625      -5.850830       0.000000       0.141258   -9999.000000   -9999.000000       0.025400       0.047000
53669     53669     shanxi         111.8167       38.0667           88       167     2012      01        11        011              0.017958      -7.115295       0.000000       0.137284   -9999.000000   -9999.000000       0.023700       0.114000
53669     53669     shanxi         111.8167       38.0667           88       167     2012      01        12        012              0.018042      -7.719604       0.000000       0.133018   -9999.000000   -9999.000000       0.028500       0.046000
53669     53669     shanxi         111.8167       38.0667           88       167     2012      01        13        013              0.018375      -6.388031       0.000000       0.140872   -9999.000000   -9999.000000       0.023500   -9999.000000
53669     53669     shanxi         111.8167       38.0667           88       167     2012      01        14        014              0.018708      -6.027283       0.000000       0.141039   -9999.000000   -9999.000000   -9999.000000       0.113000
53669     53669     shanxi         111.8167       38.0667           88       167     2012      01        15        015              0.018917      -6.066956       0.000000       0.139874   -9999.000000   -9999.000000       0.028200       0.094000
53669     53669     shanxi         111.8167       38.0667           88       167     2012      01        16        016              0.017917      -5.707489       0.000000       0.143371   -9999.000000   -9999.000000       0.021300       0.109000
53669     53669     shanxi         111.8167       38.0667           88       167     2012      01        17        017              0.000000      -5.976196       0.000000       0.139035   -9999.000000   -9999.000000       0.026600       0.094000
53669     53669     shanxi         111.8167       38.0667           88       167     2012      01        18        018              0.019167      -5.072784       0.000000       0.149047   -9999.000000   -9999.000000       0.025900   -9999.000000
53669     53669     shanxi         111.8167       38.0667           88       167     2012      01        19        019              0.020333      -4.933014       0.000000       0.148309   -9999.000000   -9999.000000       0.022700       0.109000
53669     53669     shanxi         111.8167       38.0667           88       167     2012      01        20        020              0.020583      -3.531403       0.000000       0.155340   -9999.000000   -9999.000000   -9999.000000       0.071000
53669     53669     shanxi         111.8167       38.0667           88       167     2012      01        21        021              0.018875      -5.610748       0.000000       0.140159   -9999.000000   -9999.000000       0.021400       0.002000
53669     53669     shanxi         111.8167       38.0667           88       167     2012      01        22        022              0.016958      -9.785736       0.000000       0.127796   -9999.000000   -9999.000000       0.016200       0.044000
53669     53669     shanxi         111.8167       38.0667           88       167     2012      01        23        023              0.016333     -11.752472       0.000000       0.122429   -9999.000000   -9999.000000       0.024300   -9999.000000
53669     53669     shanxi         111.8167       38.0667           88       167     2012      01        24        024              0.016292     -11.386230       0.000000       0.122123   -9999.000000   -9999.000000   -9999.000000       0.083000
53669     53669     shanxi         111.8167       38.0667           88       167     2012      01        25        025              0.016917     -11.120056       0.000000       0.122381   -9999.000000   -9999.000000       0.022200       0.060000
53669     53669     shanxi         111.8167       38.0667           88       167     2012      01        26        026              0.017917      -9.094086       0.000000       0.124859   -9999.000000   -9999.000000       0.029000       0.126000
53669     53669     shanxi         111.8167       38.0667           88       167     2012      01        27        027              0.018542      -6.833527       0.000000       0.138164   -9999.000000   -9999.000000       0.027400       0.060000
53669     53669     shanxi         111.8167       38.0667           88       167     2012      01        28        028              0.019042      -4.943512       0.000000       0.147849   -9999.000000   -9999.000000       0.021700   -9999.000000
53669     53669     shanxi         111.8167       38.0667           88       167     2012      01        29        029              0.019417      -4.854950       0.000000       0.153282   -9999.000000   -9999.000000       0.028400       0.065000
53669     53669     shanxi         111.8167       38.0667           88       167     2012      01        30        030              0.019833      -4.993164       0.000000       0.152633   -9999.000000   -9999.000000       0.024100       0.065000
53669     53669     shanxi         111.8167       38.0667           88       167     2012      01        31        031              0.021208      -4.154388       0.000000       0.155000   -9999.000000   -9999.000000   -9999.000000       0.159000
53669     53669     shanxi         111.8167       38.0667           88       167     2012      02        01        032              0.019167      -2.146210       0.000000       0.175439   -9999.000000   -9999.000000       0.028300       0.025000
53669     53669     shanxi         111.8167       38.0667           88       167     2012      02        02        033              0.018333      -7.773590       0.000000       0.137043   -9999.000000   -9999.000000       0.023100   -9999.000000
53669     53669     shanxi         111.8167       38.0667           88       167     2012      02        03        034              0.019292      -7.609680       0.000000       0.135248   -9999.000000   -9999.000000       0.031000       0.001000
53669     53669     shanxi         111.8167       38.0667           88       167     2012      02        04        035              0.020667      -5.506287       0.000000       0.147948   -9999.000000   -9999.000000       0.031000       0.075000
53669     53669     shanxi         111.8167       38.0667           88       167     2012      02        05        036              0.022333      -4.015411       0.000000       0.153495   -9999.000000   -9999.000000       0.025600       0.080000
53669     53669     shanxi         111.8167       38.0667           88       167     2012      02        06        037              0.019458      -2.387024       0.000000       0.167463   -9999.000000   -9999.000000   -9999.000000       0.003000
53669     53669     shanxi         111.8167       38.0667           88       167     2012      02        07        038              0.018125      -8.986786       0.000000       0.132137   -9999.000000   -9999.000000       0.030200       0.051000
53669     53669     shanxi         111.8167       38.0667           88       167     2012      02        08        039              0.018000      -9.672546       0.000000       0.124191   -9999.000000   -9999.000000       0.031700       0.080000
53669     53669     shanxi         111.8167       38.0667           88       167     2012      02        09        040              0.018083      -8.713470       0.000000       0.126639   -9999.000000   -9999.000000       0.032800       0.131000
53669     53669     shanxi         111.8167       38.0667           88       167     2012      02        10        041              0.018875      -8.353363       0.000000       0.128248   -9999.000000   -9999.000000       0.028200       0.095000
53669     53669     shanxi         111.8167       38.0667           88       167     2012      02        11        042              0.021250      -6.578552       0.000000       0.142615   -9999.000000   -9999.000000   -9999.000000   -9999.000000
53669     53669     shanxi         111.8167       38.0667           88       167     2012      02        12        043              0.020500      -3.366547       0.000000       0.158865   -9999.000000   -9999.000000   -9999.000000       0.138000
53669     53669     shanxi         111.8167       38.0667           88       167     2012      02        13        044              0.022875      -4.730316       0.000000       0.144468   -9999.000000   -9999.000000   -9999.000000       0.108000
53669     53669     shanxi         111.8167       38.0667           88       167     2012      02        14        045              0.023417      -1.511475       0.000000       0.176789   -9999.000000   -9999.000000       0.033900       0.217000
53669     53669     shanxi         111.8167       38.0667           88       167     2012      02        15        046              0.022958      -1.799683       0.000000       0.175702   -9999.000000   -9999.000000       0.037700       0.126000
53669     53669     shanxi         111.8167       38.0667           88       167     2012      02        16        047              0.021625      -3.764893       0.000000       0.164844   -9999.000000   -9999.000000       0.029200   -9999.000000
53669     53669     shanxi         111.8167       38.0667           88       167     2012      02        17        048              0.020458      -6.097717       0.000000       0.141721   -9999.000000   -9999.000000   -9999.000000       0.153000
53669     53669     shanxi         111.8167       38.0667           88       167     2012      02        18        049              0.020417      -7.794678       0.000000       0.133809   -9999.000000   -9999.000000       0.038800       0.103000
53669     53669     shanxi         111.8167       38.0667           88       167     2012      02        19        050              0.022042      -6.994843       0.000000       0.142956   -9999.000000   -9999.000000       0.034800       0.175000
53669     53669     shanxi         111.8167       38.0667           88       167     2012      02        20        051              0.025333      -3.443146       0.000000       0.162815       0.096000   -9999.000000       0.041800       0.188000
53669     53669     shanxi         111.8167       38.0667           88       167     2012      02        21        052              0.031792      -0.212524       0.000000       0.185311   -9999.000000       0.002300   -9999.000000   -9999.000000
53669     53669     shanxi         111.8167       38.0667           88       167     2012      02        22        053              0.046792       1.715088       0.000000       0.197671   -9999.000000   -9999.000000       0.042200       0.370000
53669     53669     shanxi         111.8167       38.0667           88       167     2012      02        23        054              0.042875       2.323334       0.000000       0.203120       0.084000   -9999.000000       0.037800       0.267000
53669     53669     shanxi         111.8167       38.0667           88       167     2012      02        24        055              0.045042       0.948975       0.000000       0.194784   -9999.000000   -9999.000000       0.037500       0.272000
53669     53669     shanxi         111.8167       38.0667           88       167     2012      02        25        056              0.032917      -0.366089       0.000000       0.188293   -9999.000000   -9999.000000       0.034600       0.096000
53669     53669     shanxi         111.8167       38.0667           88       167     2012      02        26        057              0.035333      -2.291626       0.000000       0.164549   -9999.000000       0.061800       0.043700   -9999.000000
53669     53669     shanxi         111.8167       38.0667           88       167     2012      02        27        058              0.043333      -1.460632       0.000000       0.176585   -9999.000000   -9999.000000   -9999.000000       0.096000
53669     53669     shanxi         111.8167       38.0667           88       167     2012      02        28        059              0.042125       0.509796       0.000000       0.188363       0.082000       0.041200   -9999.000000       0.306000
53669     53669     shanxi         111.8167       38.0667           88       167     2012      02        29        060              0.000000   -9999.000000       0.000000   -9999.000000       0.090000   -9999.000000   -9999.000000   -9999.000000
53669     53669     shanxi         111.8167       38.0667           88       167     2012      03        01        061              0.064792       0.946594       0.000000       0.193190   -9999.000000   -9999.000000       0.045200       0.133000
53669     53669     shanxi         111.8167       38.0667           88       167     2012      03        02        062              0.079708       1.478363       0.000000       0.203638   -9999.000000   -9999.000000       0.036600   -9999.000000
53669     53669     shanxi         111.8167       38.0667           88       167     2012      03        03        063              0.072375       1.845276       0.000000       0.206031   -9999.000000   -9999.000000       0.042200       0.196000
53669     53669     shanxi         111.8167       38.0667           88       167     2012      03        04        064              0.065833      -0.092957       0.000000       0.188495       0.104000       0.082200       0.043900       0.249000
53669     53669     shanxi         111.8167       38.0667           88       167     2012      03        05        065              0.068208       0.866852       0.348529       0.197055       0.099000   -9999.000000   -9999.000000       0.216000
53669     53669     shanxi         111.8167       38.0667           88       167     2012      03        06        066              0.058625      -0.813751       0.380688       0.184740       0.102000   -9999.000000       0.042700       0.037000
53669     53669     shanxi         111.8167       38.0667           88       167     2012      03        07        067              0.000000      -0.761200       0.000000       0.183339       0.103000       0.122800       0.041200       0.291000
53669     53669     shanxi         111.8167       38.0667           88       167     2012      03        08        068              0.069125       1.738434       0.000000       0.195820   -9999.000000   -9999.000000       0.049300       0.244000
53669     53669     shanxi         111.8167       38.0667           88       167     2012      03        09        069              0.068667       0.760681       0.000000       0.195480       0.108000   -9999.000000       0.053900       0.479000
53669     53669     shanxi         111.8167       38.0667           88       167     2012      03        10        070              0.062083       1.597351       1.278261       0.198519       0.087000       0.059900       0.045800       0.233000
53669     53669     shanxi         111.8167       38.0667           88       167     2012      03        11        071              0.062792       0.854126       0.000000       0.192460       0.089000   -9999.000000       0.042200   -9999.000000
53669     53669     shanxi         111.8167       38.0667           88       167     2012      03        12        072              0.071250       2.010712       0.000000       0.194100       0.087000   -9999.000000       0.046500       0.404000
53669     53669     shanxi         111.8167       38.0667           88       167     2012      03        13        073              0.071625       2.353943       0.000000       0.198337   -9999.000000   -9999.000000       0.048000       0.325000
53669     53669     shanxi         111.8167       38.0667           88       167     2012      03        14        074              0.076250       3.702606       0.000000       0.201754   -9999.000000   -9999.000000   -9999.000000       0.375000
53669     53669     shanxi         111.8167       38.0667           88       167     2012      03        15        075              0.078958       5.578156       0.000000       0.213644   -9999.000000       0.198900       0.054000       0.503000
53669     53669     shanxi         111.8167       38.0667           88       167     2012      03        16        076              0.081583       2.644653       0.000000       0.211834       0.094000   -9999.000000   -9999.000000   -9999.000000
53669     53669     shanxi         111.8167       38.0667           88       167     2012      03        17        077              0.082458       6.437286       0.243554       0.217861       0.086000       0.053800       0.048900       0.580000
53669     53669     shanxi         111.8167       38.0667           88       167     2012      03        18        078              0.081292       7.808105       0.000000       0.220312   -9999.000000   -9999.000000       0.050900       0.610000
53669     53669     shanxi         111.8167       38.0667           88       167     2012      03        19        079              0.079708       5.398224       0.000000       0.219005   -9999.000000   -9999.000000       0.054100       0.614000
53669     53669     shanxi         111.8167       38.0667           88       167     2012      03        20        080              0.081250       3.567444       0.000000       0.213399       0.087000   -9999.000000       0.058500       0.470000
53669     53669     shanxi         111.8167       38.0667           88       167     2012      03        21        081              0.078250       6.395050       0.000000       0.216616   -9999.000000   -9999.000000       0.059700   -9999.000000
53669     53669     shanxi         111.8167       38.0667           88       167     2012      03        22        082              0.082417       2.959259       0.360090       0.214776       0.117000   -9999.000000   -9999.000000       0.724000
53669     53669     shanxi         111.8167       38.0667           88       167     2012      03        23        083              0.086875       3.564697       0.000000       0.215535   -9999.000000   -9999.000000       0.050700       0.424000
53669     53669     shanxi         111.8167       38.0667           88       167     2012      03        24        084              0.086792       2.821198       0.000000       0.203759   -9999.000000   -9999.000000   -9999.000000       0.568000
53669     53669     shanxi         111.8167       38.0667           88       167     2012      03        25        085              0.000000       6.456055       0.000000       0.209778       0.085000       0.082100       0.058500       0.457000
53669     53669     shanxi         111.8167       38.0667           88       167     2012      03        26        086              0.089125       7.937347       0.087259       0.210371       0.074000   -9999.000000       0.060300   -9999.000000
53669     53669     shanxi         111.8167       38.0667           88       167     2012      03        27        087              0.088792       9.103363       0.000000       0.208470       0.080000   -9999.000000       0.058900       0.527000
53669     53669     shanxi         111.8167       38.0667           88       167     2012      03        28        088              0.087833       9.902496       0.041984       0.204667       0.090000       0.063400       0.066400       0.537000
53669     53669     shanxi         111.8167       38.0667           88       167     2012      03        29        089              0.086792      11.432770       0.000000       0.205105   -9999.000000   -9999.000000       0.054300       0.627000
53669     53669     shanxi         111.8167       38.0667           88       167     2012      03        30        090              0.082458      10.591461       0.426997       0.200961       0.088000   -9999.000000       0.054000       0.322000
53669     53669     shanxi         111.8167       38.0667           88       167     2012      03        31        091              0.082667       6.500793       0.000000       0.200045       0.073000   -9999.000000       0.053100   -9999.000000
53669     53669     shanxi         111.8167       38.0667           88       167     2012      04        01        092              0.082417       9.279419       0.000000       0.200526       0.090000   -9999.000000       0.058000       0.695000
53669     53669     shanxi         111.8167       38.0667           88       167     2012      04        02        093              0.077500      11.868225       0.136818       0.196750       0.085000       0.242700   -9999.000000       0.376000
53669     53669     shanxi         111.8167       38.0667           88       167     2012      04        03        094              0.077708       5.606567       0.000000       0.190386   -9999.000000   -9999.000000       0.052000       0.488000
53669     53669     shanxi         111.8167       38.0667           88       167     2012      04        04        095              0.078333       8.797424       0.000000       0.195957   -9999.000000   -9999.000000       0.050200       0.296000
53669     53669     shanxi         111.8167       38.0667           88       167     2012      04        05        096              0.077917      11.294006       0.000000       0.190782       0.083000   -9999.000000       0.058100       0.392000
53669     53669     shanxi         111.8167       38.0667           88       167     2012      04        06        097              0.076750      11.064606       1.631053       0.187026       0.081000       0.088200       0.050100       0.593000
53669     53669     shanxi         111.8167       38.0667           88       167     2012      04        07        098              0.076125      11.766113       0.000000       0.183760       0.082000   -9999.000000       0.053400       0.511000
53669     53669     shanxi         111.8167       38.0667           88       167     2012      04        08        099              0.075458      13.403107       0.000000       0.180422   -9999.000000   -9999.000000   -9999.000000       0.546000
53669     53669     shanxi         111.8167       38.0667           88       167     2012      04        09        100              0.074917      14.764557       0.000000       0.176945       0.103000       0.055100       0.055300   -9999.000000
53669     53669     shanxi         111.8167       38.0667           88       167     2012      04        10        101              0.071000      15.935974       0.773094       0.175623       0.096000   -9999.000000       0.062200       0.313000
53669     53669     shanxi         111.8167       38.0667           88       167     2012      04        11        102              0.068667      13.064697       0.459023       0.187291       0.089000       0.220000       0.064700       0.880000
53669     53669     shanxi         111.8167       38.0667           88       167     2012      04        12        103              0.070750       9.445129       0.498861       0.194045       0.087000   -9999.000000       0.064600       0.810000
53669     53669     shanxi         111.8167       38.0667           88       167     2012      04        13        104              0.075750      10.274689       6.363956       0.194498       0.071000   -9999.000000       0.059000       0.511000
53669     53669     shanxi         111.8167       38.0667           88       167     2012      04        14        105              0.077375      13.080841       1.069981       0.187178       0.097000   -9999.000000       0.062600   -9999.000000
53669     53669     shanxi         111.8167       38.0667           88       167     2012      04        15        106              0.078958      14.019348       0.000000       0.181809       0.081500       0.067600       0.052300       0.413000
53669     53669     shanxi         111.8167       38.0667           88       167     2012      04        16        107              0.078750      15.638763       0.107086       0.176041       0.075500   -9999.000000       0.062100       0.553000
53669     53669     shanxi         111.8167       38.0667           88       167     2012      04        17        108              0.078208      14.954346       0.000000       0.172433       0.078000       0.059300       0.050700       0.440000
53669     53669     shanxi         111.8167       38.0667           88       167     2012      04        18        109              0.076542      16.974060       2.686282       0.170597       0.074000   -9999.000000   -9999.000000       0.575000
53669     53669     shanxi         111.8167       38.0667           88       167     2012      04        19        110              0.074375      16.168457       0.200293       0.196521       0.092000   -9999.000000   -9999.000000   -9999.000000
53669     53669     shanxi         111.8167       38.0667           88       167     2012      04        20        111              0.071875      14.382904       2.703275       0.198972   -9999.000000       0.136300       0.062400       0.324000
53669     53669     shanxi         111.8167       38.0667           88       167     2012      04        21        112              0.072958      14.095215       0.000000       0.213345       0.076000   -9999.000000       0.057600       0.601000
53669     53669     shanxi         111.8167       38.0667           88       167     2012      04        22        113              0.072667      16.106567       0.257969       0.204701       0.073000   -9999.000000   -9999.000000       0.357000
53669     53669     shanxi         111.8167       38.0667           88       167     2012      04        23        114              0.092792      18.690216      16.567432       0.187914       0.076000   -9999.000000       0.051100       0.353000
53669     53669     shanxi         111.8167       38.0667           88       167     2012      04        24        115              0.177250      21.527344       2.825293       0.228028   -9999.000000       0.237000       0.080500   -9999.000000
53669     53669     shanxi         111.8167       38.0667           88       167     2012      04        25        116              0.000000      11.588562       0.000000       0.287915   -9999.000000   -9999.000000   -9999.000000       0.703000
53669     53669     shanxi         111.8167       38.0667           88       167     2012      04        26        117              0.131875      10.946442       0.145937       0.257764       0.085500   -9999.000000       0.055100       0.542000
53669     53669     shanxi         111.8167       38.0667           88       167     2012      04        27        118              0.123500      16.167572       0.000000       0.239425       0.076000       0.142900   -9999.000000       0.410000
53669     53669     shanxi         111.8167       38.0667           88       167     2012      04        28        119              0.118208      16.039032       0.474740       0.224503       0.076000   -9999.000000       0.054600       0.509000
53669     53669     shanxi         111.8167       38.0667           88       167     2012      04        29        120              0.114875      18.870514       0.000000       0.213017       0.088000       0.185000       0.053900   -9999.000000
53669     53669     shanxi         111.8167       38.0667           88       167     2012      04        30        121              0.111917      20.479248       0.000000       0.200560       0.093000       0.141400   -9999.000000       0.565000
53669     53669     shanxi         111.8167       38.0667           88       167     2012      05        01        122              0.105125      22.028839       1.049707       0.191486       0.110000   -9999.000000       0.066500       0.438000
53669     53669     shanxi         111.8167       38.0667           88       167     2012      05        02        123              0.105083      16.806488       0.000000       0.205095       0.094000       0.110500       0.058000       0.436000
53669     53669     shanxi         111.8167       38.0667           88       167     2012      05        03        124              0.102125      21.285767       0.000000       0.194190       0.083000   -9999.000000       0.060100       0.226000
53669     53669     shanxi         111.8167       38.0667           88       167     2012      05        04        125              0.100167      21.430298       0.000000       0.184793       0.090500   -9999.000000       0.052500       0.329000
53669     53669     shanxi         111.8167       38.0667           88       167     2012      05        05        126              0.096333      23.026093       1.555208       0.177868       0.091000   -9999.000000       0.052700       0.513000
53669     53669     shanxi         111.8167       38.0667           88       167     2012      05        06        127              0.093292      23.125824       0.000000       0.172813       0.085000   -9999.000000   -9999.000000       0.471000
53669     53669     shanxi         111.8167       38.0667           88       167     2012      05        07        128              0.089000      24.684662       0.170805       0.170119   -9999.000000   -9999.000000       0.052000       0.379000
53669     53669     shanxi         111.8167       38.0667           88       167     2012      05        08        129              0.087292      22.844269       0.302967       0.170971       0.071000       0.174400       0.050300   -9999.000000
53669     53669     shanxi         111.8167       38.0667           88       167     2012      05        09        130              0.079833      24.940582       4.873333       0.171975       0.082000   -9999.000000       0.062400       0.972000
53669     53669     shanxi         111.8167       38.0667           88       167     2012      05        10        131              0.083292      20.284943       1.036906       0.229912       0.103000   -9999.000000       0.053900       0.505000
53669     53669     shanxi         111.8167       38.0667           88       167     2012      05        11        132              0.078250      23.565460       0.672106       0.205004       0.166000   -9999.000000       0.063800       0.625000
53669     53669     shanxi         111.8167       38.0667           88       167     2012      05        12        133              0.076667      17.564453       0.000000       0.215665       0.122000       0.107400   -9999.000000       0.342000
53669     53669     shanxi         111.8167       38.0667           88       167     2012      05        13        134              0.075458      15.653137       0.000000       0.199575       0.107000   -9999.000000       0.050900   -9999.000000
53669     53669     shanxi         111.8167       38.0667           88       167     2012      05        14        135              0.073833      15.726685       0.000000       0.189542       0.098000   -9999.000000       0.068300       0.259000
53669     53669     shanxi         111.8167       38.0667           88       167     2012      05        15        136              0.073083      15.970886       0.000000       0.182012       0.135000       0.112700       0.056500       0.357000
53669     53669     shanxi         111.8167       38.0667           88       167     2012      05        16        137              0.071042      18.216522       0.000000       0.176442       0.127000   -9999.000000       0.057200       0.324000
53669     53669     shanxi         111.8167       38.0667           88       167     2012      05        17        138              0.069292      18.542084       0.000000       0.172226       0.114000       0.199700       0.062800       0.373000
53669     53669     shanxi         111.8167       38.0667           88       167     2012      05        18        139              0.066667      21.836029       0.540348       0.168168       0.104000   -9999.000000       0.063400   -9999.000000
53669     53669     shanxi         111.8167       38.0667           88       167     2012      05        19        140              0.063542      24.230225       0.074424       0.169808       0.086000   -9999.000000       0.065200       0.333000
53669     53669     shanxi         111.8167       38.0667           88       167     2012      05        20        141              0.059333      24.668396       0.084489       0.168561   -9999.000000       0.134200       0.058900       0.337000
53669     53669     shanxi         111.8167       38.0667           88       167     2012      05        21        142              0.052208      24.773895       1.424023       0.166331       0.241000   -9999.000000       0.084000       0.391000
53669     53669     shanxi         111.8167       38.0667           88       167     2012      05        22        143              0.054333      16.162720       0.000000       0.188829       0.172500   -9999.000000       0.067500       0.254000
53669     53669     shanxi         111.8167       38.0667           88       167     2012      05        23        144              0.054125      19.231567       0.050954       0.182379   -9999.000000   -9999.000000   -9999.000000   -9999.000000
53669     53669     shanxi         111.8167       38.0667           88       167     2012      05        24        145              0.053917      19.959961       0.000000       0.172086       0.131000   -9999.000000       0.068700       0.361000
53669     53669     shanxi         111.8167       38.0667           88       167     2012      05        25        146              0.000000      21.046417       0.092212       0.166898       0.141000   -9999.000000       0.078700       0.415000
53669     53669     shanxi         111.8167       38.0667           88       167     2012      05        26        147              0.050375      20.641327       0.344821       0.166030       0.176000       0.170200       0.064400       0.321000
53669     53669     shanxi         111.8167       38.0667           88       167     2012      05        27        148              0.049125      22.727264       0.000000       0.166459       0.166000   -9999.000000       0.065300       0.297000
53669     53669     shanxi         111.8167       38.0667           88       167     2012      05        28        149              0.046500      23.915344      11.406017       0.162656       0.146000   -9999.000000       0.064800   -9999.000000
53669     53669     shanxi         111.8167       38.0667           88       167     2012      05        29        150              0.046417      24.097076       0.000000       0.193825       0.170000   -9999.000000       0.077500       0.464000
53669     53669     shanxi         111.8167       38.0667           88       167     2012      05        30        151              0.051292      19.546997       0.464185       0.251359       0.144000       0.132500       0.074200   -9999.000000
53669     53669     shanxi         111.8167       38.0667           88       167     2012      05        31        152              0.100875      20.735016      17.662743       0.219034       0.282000       0.177600   -9999.000000   -9999.000000
53669     53669     shanxi         111.8167       38.0667           88       167     2012      06        01        153              0.145833      19.706909       0.219464       0.293863       0.237000   -9999.000000       0.084000       0.595000
53669     53669     shanxi         111.8167       38.0667           88       167     2012      06        02        154              0.123542      20.025177       2.990811       0.277659       0.196500       0.194500       0.073900       0.517000
53669     53669     shanxi         111.8167       38.0667           88       167     2012      06        03        155              0.130250      20.501038       6.869184       0.262356       0.237000   -9999.000000   -9999.000000       0.798000
53669     53669     shanxi         111.8167       38.0667           88       167     2012      06        04        156              0.129542      18.716156       0.000000       0.295093       0.154000       0.168200       0.108500       0.684000
53669     53669     shanxi         111.8167       38.0667           88       167     2012      06        05        157              0.117042      21.412720       0.513516       0.262578   -9999.000000       0.171900       0.102400       0.400000
53669     53669     shanxi         111.8167       38.0667           88       167     2012      06        06        158              0.104583      22.431458       1.651418       0.246699       0.233000   -9999.000000       0.105700   -9999.000000
53669     53669     shanxi         111.8167       38.0667           88       167     2012      06        07        159              0.094833      19.468445       5.336979       0.254427       0.220500       0.245000       0.097400       0.392000
53669     53669     shanxi         111.8167       38.0667           88       167     2012      06        08        160              0.093917      18.788208       0.000000       0.268823       0.205500   -9999.000000       0.093800       0.435000
53669     53669     shanxi         111.8167       38.0667           88       167     2012      06        09        161              0.091042      20.742523       0.229706       0.260102       0.155000   -9999.000000   -9999.000000       0.431000
53669     53669     shanxi         111.8167       38.0667           88       167     2012      06        10        162              0.082667      22.949249       0.000000       0.238147       0.203000   -9999.000000       0.094800       0.369000
53669     53669     shanxi         111.8167       38.0667           88       167     2012      06        11        163              0.000000      20.057190       0.000000       0.222124       0.211000   -9999.000000       0.099400   -9999.000000
53669     53669     shanxi         111.8167       38.0667           88       167     2012      06        12        164              0.069833      21.289795       0.000000       0.207371       0.187000   -9999.000000       0.088400       0.305000
53669     53669     shanxi         111.8167       38.0667           88       167     2012      06        13        165              0.064917      22.826904       0.000000       0.195659       0.184000       0.207500       0.085800       0.344000
53669     53669     shanxi         111.8167       38.0667           88       167     2012      06        14        166              0.059208      23.716034       0.000000       0.187035       0.170000   -9999.000000       0.084000       0.399000
53669     53669     shanxi         111.8167       38.0667           88       167     2012      06        15        167              0.056167      21.293427       0.000000       0.183460       0.178000   -9999.000000       0.092000       0.350000
53669     53669     shanxi         111.8167       38.0667           88       167     2012      06        16        168              0.054042      22.252991       0.000000       0.179813       0.212000   -9999.000000       0.087200   -9999.000000
53669     53669     shanxi         111.8167       38.0667           88       167     2012      06        17        169              0.051417      24.606201       0.000000       0.174895       0.200000   -9999.000000       0.093600       0.330000
53669     53669     shanxi         111.8167       38.0667           88       167     2012      06        18        170              0.048250      26.878571       0.000000       0.170711       0.163000       0.125800       0.089800       0.480000
53669     53669     shanxi         111.8167       38.0667           88       167     2012      06        19        171              0.042958      27.689911       3.476753       0.168266   -9999.000000   -9999.000000       0.091900       0.405000
53669     53669     shanxi         111.8167       38.0667           88       167     2012      06        20        172              0.041583      23.325714       0.362282       0.208143       0.143000       0.127200   -9999.000000       0.339000
53669     53669     shanxi         111.8167       38.0667           88       167     2012      06        21        173              0.040458      23.712311       0.295058       0.197124       0.255000   -9999.000000       0.107800   -9999.000000
53669     53669     shanxi         111.8167       38.0667           88       167     2012      06        22        174              0.048833      25.252991       8.967965       0.184107       0.253000   -9999.000000       0.105700       0.902000
53669     53669     shanxi         111.8167       38.0667           88       167     2012      06        23        175              0.107000      26.331329      14.459944       0.233945       0.281000       0.152900       0.117500       0.657000
53669     53669     shanxi         111.8167       38.0667           88       167     2012      06        24        176              0.155292      23.994904       2.061310       0.289013       0.297000   -9999.000000       0.116700       0.943000
53669     53669     shanxi         111.8167       38.0667           88       167     2012      06        25        177              0.133833      21.605988       0.000000       0.286313       0.211000       0.180400       0.100400       0.672000
53669     53669     shanxi         111.8167       38.0667           88       167     2012      06        26        178              0.118042      23.462555       0.125607       0.263102       0.256000   -9999.000000   -9999.000000   -9999.000000
53669     53669     shanxi         111.8167       38.0667           88       167     2012      06        27        179              0.112333      22.984009      15.664965       0.250270       0.271000   -9999.000000       0.132700       1.000000
53669     53669     shanxi         111.8167       38.0667           88       167     2012      06        28        180              0.178167      19.579468      38.671570       0.291060       0.386000   -9999.000000       0.108600   -9999.000000
53669     53669     shanxi         111.8167       38.0667           88       167     2012      06        29        181              0.188000      18.538971       0.920236       0.347991       0.299500   -9999.000000       0.120600       1.000000
53669     53669     shanxi         111.8167       38.0667           88       167     2012      06        30        182              0.153792      20.857544       0.000000       0.329194       0.237000   -9999.000000       0.103500   -9999.000000
53669     53669     shanxi         111.8167       38.0667           88       167     2012      07        01        183              0.131708      23.701447       0.000000       0.303406       0.198500       0.218600       0.096200       0.726000
53669     53669     shanxi         111.8167       38.0667           88       167     2012      07        02        184              0.112000      25.308960       0.000000       0.289403       0.247000   -9999.000000       0.106400       0.586000
53669     53669     shanxi         111.8167       38.0667           88       167     2012      07        03        185              0.093042      26.193207       0.965063       0.275973       0.220500   -9999.000000       0.121000       0.592000
53669     53669     shanxi         111.8167       38.0667           88       167     2012      07        04        186              0.085833      24.981537       2.277658       0.270172       0.230000   -9999.000000       0.124700       0.543000
53669     53669     shanxi         111.8167       38.0667           88       167     2012      07        05        187              0.083833      23.187653       0.000000       0.280211       0.203000   -9999.000000       0.097800   -9999.000000
53669     53669     shanxi         111.8167       38.0667           88       167     2012      07        06        188              0.077583      25.756775       1.887988       0.264524   -9999.000000       0.165900       0.099900       0.466000
53669     53669     shanxi         111.8167       38.0667           88       167     2012      07        07        189              0.071875      25.212433       0.122506       0.267667   -9999.000000   -9999.000000   -9999.000000       0.632000
53669     53669     shanxi         111.8167       38.0667           88       167     2012      07        08        190              0.067250      24.047821       9.618876       0.260441       0.317000       0.095100       0.121500       0.584000
53669     53669     shanxi         111.8167       38.0667           88       167     2012      07        09        191              0.119417      22.814209       7.292720       0.294564       0.257000   -9999.000000       0.120500       0.941000
53669     53669     shanxi         111.8167       38.0667           88       167     2012      07        10        192              0.144958      21.382233       2.809842       0.312417       0.201000   -9999.000000       0.110000   -9999.000000
53669     53669     shanxi         111.8167       38.0667           88       167     2012      07        11        193              0.123417      24.527283       0.000000       0.295911       0.187000       0.281900       0.104400       0.667000
53669     53669     shanxi         111.8167       38.0667           88       167     2012      07        12        194              0.104958      25.307159       0.000000       0.277091       0.239000   -9999.000000       0.100400       0.569000
53669     53669     shanxi         111.8167       38.0667           88       167     2012      07        13        195              0.094958      25.464935      11.196404       0.262872   -9999.000000       0.187500   -9999.000000       0.543000
53669     53669     shanxi         111.8167       38.0667           88       167     2012      07        14        196              0.093083      23.703003       3.862548       0.299229       0.234500   -9999.000000       0.118400       0.947000
53669     53669     shanxi         111.8167       38.0667           88       167     2012      07        15        197              0.093625      22.727966       0.171454       0.303350       0.234500   -9999.000000       0.116600   -9999.000000
53669     53669     shanxi         111.8167       38.0667           88       167     2012      07        16        198              0.093667      23.164215       0.000000       0.286407       0.198000       0.159200       0.113600       0.712000
53669     53669     shanxi         111.8167       38.0667           88       167     2012      07        17        199              0.132167      23.656006       0.000000       0.272275       0.203000   -9999.000000       0.109200       0.501000
53669     53669     shanxi         111.8167       38.0667           88       167     2012      07        18        200              0.159167      23.507568       0.000000       0.259937       0.238000   -9999.000000       0.111700       0.484000
53669     53669     shanxi         111.8167       38.0667           88       167     2012      07        19        201              0.157333      23.997498       0.000000       0.252075       0.200000       0.115400       0.113300       0.489000
53669     53669     shanxi         111.8167       38.0667           88       167     2012      07        20        202              0.155174      24.891571       6.236141       0.243189       0.199000   -9999.000000       0.117600   -9999.000000
53669     53669     shanxi         111.8167       38.0667           88       167     2012      07        21        203              0.231913      25.927429      20.655699       0.255007   -9999.000000       0.028300       0.130300       0.968000
53669     53669     shanxi         111.8167       38.0667           88       167     2012      07        22        204              0.229417      21.179749       0.000000       0.331325       0.288000   -9999.000000       0.124400       0.657000
53669     53669     shanxi         111.8167       38.0667           88       167     2012      07        23        205              0.211250      22.317841       0.290396       0.295078       0.298000   -9999.000000       0.129600       0.669000
53669     53669     shanxi         111.8167       38.0667           88       167     2012      07        24        206              0.202417      22.915222       2.254443       0.283740       0.310000       0.112000   -9999.000000       0.831000
53669     53669     shanxi         111.8167       38.0667           88       167     2012      07        25        207              0.198833      23.282349       0.739805       0.286894       0.299500       0.270200       0.135800   -9999.000000
53669     53669     shanxi         111.8167       38.0667           88       167     2012      07        26        208              0.254375      24.063293      34.523643       0.282272       0.310000       0.069500       0.097700       0.972000
53669     53669     shanxi         111.8167       38.0667           88       167     2012      07        27        209              0.271167      25.232697      27.415529       0.334874       0.355000   -9999.000000       0.144100   -9999.000000
53669     53669     shanxi         111.8167       38.0667           88       167     2012      07        28        210              0.265917      23.139374       2.290212       0.353683       0.322000   -9999.000000       0.150400       0.879000
53669     53669     shanxi         111.8167       38.0667           88       167     2012      07        29        211              0.233375      25.060913       0.000000       0.333969       0.277000       0.142700       0.136000   -9999.000000
53669     53669     shanxi         111.8167       38.0667           88       167     2012      07        30        212              0.282167      25.635712      54.971088       0.311787       0.320000   -9999.000000   -9999.000000       0.931000
53669     53669     shanxi         111.8167       38.0667           88       167     2012      07        31        213              0.270708      21.740295       2.248796       0.365362       0.335000       0.097100       0.164700       0.977000
53669     53669     shanxi         111.8167       38.0667           88       167     2012      08        01        214              0.242167      21.017365       0.000000       0.342977       0.444000   -9999.000000       0.167100       0.990000
53669     53669     shanxi         111.8167       38.0667           88       167     2012      08        02        215              0.225917      23.500305       0.157662       0.325527       0.362000   -9999.000000       0.166300       0.812000
53669     53669     shanxi         111.8167       38.0667           88       167     2012      08        03        216              0.212667      25.108978       0.000000       0.314914       0.364000   -9999.000000       0.154700   -9999.000000
53669     53669     shanxi         111.8167       38.0667           88       167     2012      08        04        217              0.203625      24.971252       0.000000       0.306099       0.384000   -9999.000000   -9999.000000       0.835000
53669     53669     shanxi         111.8167       38.0667           88       167     2012      08        05        218              0.194375      25.525940       0.657859       0.298318       0.387000   -9999.000000       0.162000       0.802000
53669     53669     shanxi         111.8167       38.0667           88       167     2012      08        06        219              0.191417      23.364441       1.216042       0.300370       0.275000   -9999.000000       0.153600       0.725000
53669     53669     shanxi         111.8167       38.0667           88       167     2012      08        07        220              0.188083      24.185547       3.618136       0.299742       0.298000   -9999.000000       0.140600       0.736000
53669     53669     shanxi         111.8167       38.0667           88       167     2012      08        08        221              0.182708      26.012329       2.642388       0.301918       0.394000       0.040600       0.149800   -9999.000000
53669     53669     shanxi         111.8167       38.0667           88       167     2012      08        09        222              0.177167      24.796997       0.000000       0.303723       0.344000   -9999.000000       0.144600       0.650000
53669     53669     shanxi         111.8167       38.0667           88       167     2012      08        10        223              0.170792      24.159332       0.000000       0.289751       0.303000   -9999.000000   -9999.000000       0.577000
53669     53669     shanxi         111.8167       38.0667           88       167     2012      08        11        224              0.165333      23.580475       0.603228       0.280061       0.293500       0.207200       0.166400       0.576000
53669     53669     shanxi         111.8167       38.0667           88       167     2012      08        12        225              0.161667      22.573761       0.058392       0.283596       0.305000   -9999.000000       0.158500       0.686000
53669     53669     shanxi         111.8167       38.0667           88       167     2012      08        13        226              0.159708      23.059875       0.409959       0.282991       0.262000       0.048200       0.159600   -9999.000000
53669     53669     shanxi         111.8167       38.0667           88       167     2012      08        14        227              0.159083      22.350128       6.541890       0.279622       0.330000   -9999.000000       0.185200       1.000000
53669     53669     shanxi         111.8167       38.0667           88       167     2012      08        15        228              0.166667      20.917419       0.000000       0.305573       0.319500   -9999.000000       0.161500       0.698000
53669     53669     shanxi         111.8167       38.0667           88       167     2012      08        16        229              0.165625      23.284576       3.565731       0.284390       0.219000       0.343200       0.171600       0.610000
53669     53669     shanxi         111.8167       38.0667           88       167     2012      08        17        230              0.189625      23.406036       8.928901       0.281836   -9999.000000   -9999.000000       0.174400       0.989000
53669     53669     shanxi         111.8167       38.0667           88       167     2012      08        18        231              0.225167      20.504852       3.930564       0.319073   -9999.000000       0.172200       0.181000   -9999.000000
53669     53669     shanxi         111.8167       38.0667           88       167     2012      08        19        232              0.215292      20.461060       0.000000       0.314601       0.339000   -9999.000000       0.168300       0.748000
53669     53669     shanxi         111.8167       38.0667           88       167     2012      08        20        233              0.202458      22.777283       0.842907       0.295404       0.314000       0.337100       0.169100       0.701000
53669     53669     shanxi         111.8167       38.0667           88       167     2012      08        21        234              0.189500      22.026154       0.000000       0.289106       0.314500       0.213300   -9999.000000       0.635000
53669     53669     shanxi         111.8167       38.0667           88       167     2012      08        22        235              0.181000      18.655029       0.000000       0.278298       0.322000       0.185400       0.170400   -9999.000000
53669     53669     shanxi         111.8167       38.0667           88       167     2012      08        23        236              0.173667      19.328949       0.000000       0.272015       0.303000   -9999.000000       0.171500   -9999.000000
53669     53669     shanxi         111.8167       38.0667           88       167     2012      08        24        237              0.167708      19.629608       0.000000       0.266852   -9999.000000       0.150100       0.185800       0.515000
53669     53669     shanxi         111.8167       38.0667           88       167     2012      08        25        238              0.000000      20.578583       0.000000       0.261479       0.350000   -9999.000000       0.165400       0.516000
53669     53669     shanxi         111.8167       38.0667           88       167     2012      08        26        239              0.157208      21.420776       0.519055       0.258848       0.352000       0.017300       0.167600       0.652000
53669     53669     shanxi         111.8167       38.0667           88       167     2012      08        27        240              0.153500      21.249023       3.028150       0.260065       0.306500   -9999.000000   -9999.000000   -9999.000000
53669     53669     shanxi         111.8167       38.0667           88       167     2012      08        28        241              0.150208      21.545105       0.392905       0.272831       0.270000   -9999.000000       0.147700       0.452000
53669     53669     shanxi         111.8167       38.0667           88       167     2012      08        29        242              0.145792      22.158508       0.299462       0.263429       0.284000       0.214600       0.156900       0.487000
53669     53669     shanxi         111.8167       38.0667           88       167     2012      08        30        243              0.141708      22.620575       0.000000       0.251649       0.316000       0.260800       0.139300       0.603000
53669     53669     shanxi         111.8167       38.0667           88       167     2012      08        31        244              0.138208      21.944489       8.647518       0.245115       0.331000       0.029800       0.143600       0.498000
53669     53669     shanxi         111.8167       38.0667           88       167     2012      09        01        245              0.232583      20.150513      29.966452       0.265360       0.402000   -9999.000000       0.161900   -9999.000000
53669     53669     shanxi         111.8167       38.0667           88       167     2012      09        02        246              0.240542      17.020935       0.000000       0.349582       0.415000       0.275700       0.160300       0.963000
53669     53669     shanxi         111.8167       38.0667           88       167     2012      09        03        247              0.221458      17.299011       0.000000       0.313710       0.368000   -9999.000000       0.147600       0.677000
53669     53669     shanxi         111.8167       38.0667           88       167     2012      09        04        248              0.210375      16.696777       5.671268       0.300919   -9999.000000   -9999.000000       0.149800       0.736000
53669     53669     shanxi         111.8167       38.0667           88       167     2012      09        05        249              0.216083      18.268494       9.769246       0.301093   -9999.000000       0.183100       0.153400       0.670000
53669     53669     shanxi         111.8167       38.0667           88       167     2012      09        06        250              0.252417      18.241119       7.100398       0.320202       0.404000   -9999.000000       0.146100   -9999.000000
53669     53669     shanxi         111.8167       38.0667           88       167     2012      09        07        251              0.239417      16.707031       0.087094       0.329018       0.368500   -9999.000000   -9999.000000       0.937000
53669     53669     shanxi         111.8167       38.0667           88       167     2012      09        08        252              0.223500      18.730011       0.271634       0.309943       0.355000       0.396400       0.156600       0.746000
53669     53669     shanxi         111.8167       38.0667           88       167     2012      09        09        253              0.210208      18.814819       0.074815       0.300125       0.375000   -9999.000000       0.145600       0.718000
53669     53669     shanxi         111.8167       38.0667           88       167     2012      09        10        254              0.201417      19.011658       1.257116       0.291862       0.425000   -9999.000000       0.121200       0.782000
53669     53669     shanxi         111.8167       38.0667           88       167     2012      09        11        255              0.195792      17.394592       0.000000       0.294257       0.275000       0.147500       0.108900   -9999.000000
53669     53669     shanxi         111.8167       38.0667           88       167     2012      09        12        256              0.186500      17.456635       0.043879       0.287842       0.264500   -9999.000000       0.109900       0.539000
53669     53669     shanxi         111.8167       38.0667           88       167     2012      09        13        257              0.182542      12.493683       0.244259       0.284442       0.254000   -9999.000000   -9999.000000       0.478000
53669     53669     shanxi         111.8167       38.0667           88       167     2012      09        14        258              0.180417      13.643982       0.000000       0.282863       0.222000   -9999.000000       0.114500       0.555000
53669     53669     shanxi         111.8167       38.0667           88       167     2012      09        15        259              0.177458      14.850372       0.000000       0.279039       0.265000   -9999.000000       0.113500       0.437000
53669     53669     shanxi         111.8167       38.0667           88       167     2012      09        16        260              0.174583      15.461060       0.000000       0.276460       0.281000       0.158800       0.106200   -9999.000000
53669     53669     shanxi         111.8167       38.0667           88       167     2012      09        17        261              0.171583      15.223022       1.434499       0.274848       0.243000   -9999.000000       0.089100       0.543000
53669     53669     shanxi         111.8167       38.0667           88       167     2012      09        18        262              0.177875      16.287537       1.967335       0.279456       0.260500       0.018000       0.094900       0.655000
53669     53669     shanxi         111.8167       38.0667           88       167     2012      09        19        263              0.195625      15.620819       0.446520       0.284743       0.217000   -9999.000000       0.094200       0.660000
53669     53669     shanxi         111.8167       38.0667           88       167     2012      09        20        264              0.193708      16.442719       4.914884       0.279244       0.253000       0.132600       0.106100       0.496000
53669     53669     shanxi         111.8167       38.0667           88       167     2012      09        21        265              0.214167      17.097076       4.164568       0.283046   -9999.000000       0.252500       0.103200   -9999.000000
53669     53669     shanxi         111.8167       38.0667           88       167     2012      09        22        266              0.210417      13.931671       0.000000       0.309027       0.247500   -9999.000000       0.100500       0.711000
53669     53669     shanxi         111.8167       38.0667           88       167     2012      09        23        267              0.202833      16.743103       0.000000       0.291533       0.214000       0.166400       0.100100   -9999.000000
53669     53669     shanxi         111.8167       38.0667           88       167     2012      09        24        268              0.195208      17.235962       2.138503       0.284264       0.220000   -9999.000000   -9999.000000       0.620000
53669     53669     shanxi         111.8167       38.0667           88       167     2012      09        25        269              0.258042      17.139954      21.397781       0.286139   -9999.000000       0.220100       0.109500       0.808000
53669     53669     shanxi         111.8167       38.0667           88       167     2012      09        26        270              0.245083      12.769592       0.000000       0.339966       0.263000       0.354800       0.111300       0.900000
53669     53669     shanxi         111.8167       38.0667           88       167     2012      09        27        271              0.231143      15.385712       0.000000       0.312161   -9999.000000   -9999.000000       0.105100       0.690000
53669     53669     shanxi         111.8167       38.0667           88       167     2012      09        28        272              0.206933      12.641785       0.000000       0.300458       0.224000   -9999.000000       0.105200       0.713000
53669     53669     shanxi         111.8167       38.0667           88       167     2012      09        29        273              0.201917      11.241943       0.000000       0.294476       0.253000   -9999.000000       0.106900       0.426000
53669     53669     shanxi         111.8167       38.0667           88       167     2012      09        30        274              0.195750      11.530975       0.000000       0.290030       0.228000   -9999.000000   -9999.000000   -9999.000000
53669     53669     shanxi         111.8167       38.0667           88       167     2012      10        01        275              0.191167      12.400269       0.000000       0.286332       0.198000   -9999.000000       0.076400       0.515000
53669     53669     shanxi         111.8167       38.0667           88       167     2012      10        02        276              0.187375      13.547791       0.389609       0.282912       0.206000   -9999.000000       0.080400       0.647000
53669     53669     shanxi         111.8167       38.0667           88       167     2012      10        03        277              0.183792      14.685364       0.000000       0.283280       0.176000   -9999.000000       0.077100       0.591000
53669     53669     shanxi         111.8167       38.0667           88       167     2012      10        04        278              0.176500      14.665527       0.908381       0.278198       0.210000       0.206400       0.084600       0.567000
53669     53669     shanxi         111.8167       38.0667           88       167     2012      10        05        279              0.175250      10.837067       0.000000       0.284410       0.197000       0.022900   -9999.000000   -9999.000000
53669     53669     shanxi         111.8167       38.0667           88       167     2012      10        06        280              0.173875      11.229309       0.077556       0.279658       0.200000   -9999.000000       0.082900       0.533000
53669     53669     shanxi         111.8167       38.0667           88       167     2012      10        07        281              0.171458      12.755341       0.000000       0.276566       0.206000   -9999.000000       0.079300       0.572000
53669     53669     shanxi         111.8167       38.0667           88       167     2012      10        08        282              0.169875      12.470215       0.207077       0.276701       0.209000       0.193700       0.078900       0.521000
53669     53669     shanxi         111.8167       38.0667           88       167     2012      10        09        283              0.165333      13.699646       0.000000       0.276218       0.187000       0.240100       0.070800       0.436000
53669     53669     shanxi         111.8167       38.0667           88       167     2012      10        10        284              0.162875      10.206818       0.118380       0.271546       0.184000   -9999.000000       0.073800   -9999.000000
53669     53669     shanxi         111.8167       38.0667           88       167     2012      10        11        285              0.161125      10.775269       0.000000       0.269180       0.126000       0.213300   -9999.000000       0.502000
53669     53669     shanxi         111.8167       38.0667           88       167     2012      10        12        286              0.159375      12.295319       0.000000       0.267231       0.144000   -9999.000000       0.071400       0.599000
53669     53669     shanxi         111.8167       38.0667           88       167     2012      10        13        287              0.157000      12.272308       0.000000       0.264761       0.131000       0.175300       0.077900       0.525000
53669     53669     shanxi         111.8167       38.0667           88       167     2012      10        14        288              0.154875      12.099548       0.000000       0.262686       0.138000       0.206600       0.073500       0.424000
53669     53669     shanxi         111.8167       38.0667           88       167     2012      10        15        289              0.152333      12.706726       1.430683       0.262817       0.149500   -9999.000000       0.073900   -9999.000000
53669     53669     shanxi         111.8167       38.0667           88       167     2012      10        16        290              0.148958      10.337433       4.617052       0.272659       0.165000       0.221900       0.083900       0.566000
53669     53669     shanxi         111.8167       38.0667           88       167     2012      10        17        291              0.148417       6.987274       0.000000       0.268861       0.140000   -9999.000000       0.077100       0.436000
53669     53669     shanxi         111.8167       38.0667           88       167     2012      10        18        292              0.148417       6.807709       0.115888       0.266872   -9999.000000   -9999.000000       0.078800       0.568000
53669     53669     shanxi         111.8167       38.0667           88       167     2012      10        19        293              0.149750       7.207184       9.654184       0.266860       0.150000   -9999.000000       0.078700       0.380000
53669     53669     shanxi         111.8167       38.0667           88       167     2012      10        20        294              0.150542       9.166656       0.669890       0.265214       0.137500   -9999.000000       0.071900   -9999.000000
53669     53669     shanxi         111.8167       38.0667           88       167     2012      10        21        295              0.147167      11.316132       1.422171       0.264627       0.178000   -9999.000000       0.077900       0.672000
53669     53669     shanxi         111.8167       38.0667           88       167     2012      10        22        296              0.147083       5.555237       0.000000       0.276571   -9999.000000       0.262900   -9999.000000   -9999.000000
53669     53669     shanxi         111.8167       38.0667           88       167     2012      10        23        297              0.147375       5.895416       0.000000       0.268955   -9999.000000       0.227400       0.076300       0.549000
53669     53669     shanxi         111.8167       38.0667           88       167     2012      10        24        298              0.149750       7.446014       0.000000       0.268880   -9999.000000       0.036600       0.071500       0.288000
53669     53669     shanxi         111.8167       38.0667           88       167     2012      10        25        299              0.000000       8.284241       0.000000       0.265994       0.138500   -9999.000000       0.075800       0.367000
53669     53669     shanxi         111.8167       38.0667           88       167     2012      10        26        300              0.147333       8.879486       0.000000       0.264621       0.170000       0.118900       0.069100       0.533000
53669     53669     shanxi         111.8167       38.0667           88       167     2012      10        27        301              0.148000       6.694122       0.000000       0.266085       0.148000       0.140200       0.071600       0.526000
53669     53669     shanxi         111.8167       38.0667           88       167     2012      10        28        302              0.000000       7.806244       0.000000       0.263417       0.144000   -9999.000000   -9999.000000       0.458000
53669     53669     shanxi         111.8167       38.0667           88       167     2012      10        29        303              0.145917       9.165253       0.000000       0.263060   -9999.000000       0.204000       0.058800   -9999.000000
53669     53669     shanxi         111.8167       38.0667           88       167     2012      10        30        304              0.143250       6.732483       0.000000       0.250481       0.122000   -9999.000000       0.068300       0.290000
53669     53669     shanxi         111.8167       38.0667           88       167     2012      10        31        305              0.143000       4.630249       0.000000       0.251926       0.120000       0.194200       0.061000       0.361000
53669     53669     shanxi         111.8167       38.0667           88       167     2012      11        01        306              0.142583       5.184845       0.000000       0.249762       0.116000       0.144600       0.063500       0.463000
53669     53669     shanxi         111.8167       38.0667           88       167     2012      11        02        307              0.142583       5.887451       0.152585       0.252736       0.127000   -9999.000000       0.066000       0.504000
53669     53669     shanxi         111.8167       38.0667           88       167     2012      11        03        308              0.137917       7.655396       0.330363       0.255620   -9999.000000   -9999.000000       0.056300   -9999.000000
53669     53669     shanxi         111.8167       38.0667           88       167     2012      11        04        309              0.116917      -0.206635       0.000000       0.202575   -9999.000000   -9999.000000       0.055100       0.415000
53669     53669     shanxi         111.8167       38.0667           88       167     2012      11        05        310              0.125417      -2.211761       0.000000       0.164272       0.138000   -9999.000000       0.053200       0.328000
53669     53669     shanxi         111.8167       38.0667           88       167     2012      11        06        311              0.135958       0.998749       0.000000       0.205449       0.150000       0.071900       0.063900       0.491000
53669     53669     shanxi         111.8167       38.0667           88       167     2012      11        07        312              0.138583       3.078552       0.219709       0.232236   -9999.000000   -9999.000000       0.063100       0.350000
53669     53669     shanxi         111.8167       38.0667           88       167     2012      11        08        313              0.136833       2.223511       0.000000       0.223636   -9999.000000       0.046100   -9999.000000   -9999.000000
53669     53669     shanxi         111.8167       38.0667           88       167     2012      11        09        314              0.139750       3.069855       0.295538       0.234467       0.142000       0.075700       0.061600       0.368000
53669     53669     shanxi         111.8167       38.0667           88       167     2012      11        10        315              0.135250       2.443939       0.277598       0.246066   -9999.000000       0.222000       0.048700       0.327000
53669     53669     shanxi         111.8167       38.0667           88       167     2012      11        11        316              0.111375      -0.728210       0.475009       0.194278   -9999.000000       0.096000       0.051500       0.321000
53669     53669     shanxi         111.8167       38.0667           88       167     2012      11        12        317              0.111000      -1.508240       0.000000       0.173786   -9999.000000   -9999.000000       0.054700       0.161000
53669     53669     shanxi         111.8167       38.0667           88       167     2012      11        13        318              0.000000      -0.637024       0.000000       0.188693   -9999.000000   -9999.000000       0.051700   -9999.000000
53669     53669     shanxi         111.8167       38.0667           88       167     2012      11        14        319              0.117625      -0.726807       0.000000       0.185834   -9999.000000       0.033500   -9999.000000       0.296000
53669     53669     shanxi         111.8167       38.0667           88       167     2012      11        15        320              0.104833       0.869446       0.182121       0.202906   -9999.000000   -9999.000000       0.050100       0.227000
53669     53669     shanxi         111.8167       38.0667           88       167     2012      11        16        321              0.106750      -0.374786       0.000000       0.189312   -9999.000000       0.103500       0.050700       0.193000
53669     53669     shanxi         111.8167       38.0667           88       167     2012      11        17        322              0.000000      -0.658386       0.000000       0.187825       0.146000   -9999.000000       0.060700       0.364000
53669     53669     shanxi         111.8167       38.0667           88       167     2012      11        18        323              0.118083       1.354919       0.721190       0.208273       0.141000   -9999.000000       0.054100   -9999.000000
53669     53669     shanxi         111.8167       38.0667           88       167     2012      11        19        324              0.118000       0.936066       0.000000       0.208147   -9999.000000       0.034900       0.061600       0.257000
53669     53669     shanxi         111.8167       38.0667           88       167     2012      11        20        325              0.121833       1.325562       0.000000       0.208493   -9999.000000   -9999.000000       0.060400   -9999.000000
53669     53669     shanxi         111.8167       38.0667           88       167     2012      11        21        326              0.138000       1.659821       0.000000       0.225774       0.129000   -9999.000000       0.061000       0.279000
53669     53669     shanxi         111.8167       38.0667           88       167     2012      11        22        327              0.133500       2.869049       0.000000       0.235456   -9999.000000   -9999.000000       0.056200   -9999.000000
53669     53669     shanxi         111.8167       38.0667           88       167     2012      11        23        328              0.108542      -0.286957       0.000000       0.197881   -9999.000000       0.212400       0.053600       0.153000
53669     53669     shanxi         111.8167       38.0667           88       167     2012      11        24        329              0.103625      -2.523041       0.000000       0.169209   -9999.000000       0.071200       0.050400       0.234000
53669     53669     shanxi         111.8167       38.0667           88       167     2012      11        25        330              0.101625      -0.257996       0.000000       0.186088   -9999.000000   -9999.000000   -9999.000000       0.192000
53669     53669     shanxi         111.8167       38.0667           88       167     2012      11        26        331              0.098250      -2.092590       0.000000       0.170303   -9999.000000   -9999.000000   -9999.000000       0.144000
53669     53669     shanxi         111.8167       38.0667           88       167     2012      11        27        332              0.099208      -2.123138       0.000000       0.169157   -9999.000000   -9999.000000       0.046100   -9999.000000
53669     53669     shanxi         111.8167       38.0667           88       167     2012      11        28        333              0.095167      -1.357208       0.000000       0.181190   -9999.000000   -9999.000000       0.049700       0.063000
53669     53669     shanxi         111.8167       38.0667           88       167     2012      11        29        334              0.093167      -3.736664       0.000000       0.156569   -9999.000000       0.014500       0.049800       0.122000
53669     53669     shanxi         111.8167       38.0667           88       167     2012      11        30        335              0.094250      -3.088104       0.036206       0.164266   -9999.000000   -9999.000000       0.047000       0.151000
53669     53669     shanxi         111.8167       38.0667           88       167     2012      12        01        336              0.093625      -1.468842       0.000000       0.173424   -9999.000000   -9999.000000       0.047600       0.137000
53669     53669     shanxi         111.8167       38.0667           88       167     2012      12        02        337              0.092208      -2.811951       0.000000       0.161723   -9999.000000       0.148300       0.044600   -9999.000000
53669     53669     shanxi         111.8167       38.0667           88       167     2012      12        03        338              0.090125      -2.817596       0.000000       0.161427   -9999.000000       0.185500       0.047500       0.046000
53669     53669     shanxi         111.8167       38.0667           88       167     2012      12        04        339              0.091125      -5.167847       0.000000       0.141532   -9999.000000       0.190000       0.047700       0.019000
53669     53669     shanxi         111.8167       38.0667           88       167     2012      12        05        340              0.088708      -3.199524       0.000000       0.160979   -9999.000000   -9999.000000       0.041800       0.104000
53669     53669     shanxi         111.8167       38.0667           88       167     2012      12        06        341              0.089708      -6.798035       0.000000       0.134299   -9999.000000   -9999.000000   -9999.000000       0.005000
53669     53669     shanxi         111.8167       38.0667           88       167     2012      12        07        342              0.088417      -4.697479       0.092626       0.142967   -9999.000000   -9999.000000       0.046400   -9999.000000
53669     53669     shanxi         111.8167       38.0667           88       167     2012      12        08        343              0.086208      -6.781830       0.000000       0.134331   -9999.000000   -9999.000000       0.045700       0.051000
53669     53669     shanxi         111.8167       38.0667           88       167     2012      12        09        344              0.087167      -8.700256       0.699139       0.127699   -9999.000000   -9999.000000       0.048000       0.044000
53669     53669     shanxi         111.8167       38.0667           88       167     2012      12        10        345              0.087833      -4.868988       0.083074       0.147731   -9999.000000   -9999.000000       0.046300       0.108000
53669     53669     shanxi         111.8167       38.0667           88       167     2012      12        11        346              0.087167      -4.682373       0.307869       0.154628   -9999.000000   -9999.000000       0.043900       0.027000
53669     53669     shanxi         111.8167       38.0667           88       167     2012      12        12        347              0.086458      -5.027191       0.179048       0.145937   -9999.000000   -9999.000000   -9999.000000   -9999.000000
53669     53669     shanxi         111.8167       38.0667           88       167     2012      12        13        348              0.087167      -4.727997       0.000000       0.146064   -9999.000000   -9999.000000       0.050400       0.037000
53669     53669     shanxi         111.8167       38.0667           88       167     2012      12        14        349              0.088870      -4.597992       0.000000       0.136219   -9999.000000   -9999.000000       0.044600       0.079000
53669     53669     shanxi         111.8167       38.0667           88       167     2012      12        15        350              0.000000      -3.600433       0.000000       0.150406   -9999.000000       0.018000       0.047700       0.071000
53669     53669     shanxi         111.8167       38.0667           88       167     2012      12        16        351              0.091542      -3.105133       0.000000       0.148409   -9999.000000       0.175600       0.044300       0.109000
53669     53669     shanxi         111.8167       38.0667           88       167     2012      12        17        352              0.088458      -2.839386       0.000000       0.159987   -9999.000000       0.038400       0.041100   -9999.000000
53669     53669     shanxi         111.8167       38.0667           88       167     2012      12        18        353              0.086583      -5.832611       0.000000       0.146871   -9999.000000   -9999.000000       0.039400       0.039000
53669     53669     shanxi         111.8167       38.0667           88       167     2012      12        19        354              0.085875      -6.469299       0.000000       0.135796   -9999.000000   -9999.000000       0.044000   -9999.000000
53669     53669     shanxi         111.8167       38.0667           88       167     2012      12        20        355              0.000000      -6.119110       0.000000       0.129654   -9999.000000       0.119000       0.038600       0.017000
53669     53669     shanxi         111.8167       38.0667           88       167     2012      12        21        356              0.086917      -5.907227       0.000000       0.130475   -9999.000000   -9999.000000       0.038500   -9999.000000
53669     53669     shanxi         111.8167       38.0667           88       167     2012      12        22        357              0.085333      -7.235077       0.000000       0.130606   -9999.000000   -9999.000000       0.032700       0.032000
53669     53669     shanxi         111.8167       38.0667           88       167     2012      12        23        358              0.083833     -12.250641       0.000000       0.125461   -9999.000000   -9999.000000   -9999.000000       0.018000
53669     53669     shanxi         111.8167       38.0667           88       167     2012      12        24        359              0.083737     -13.098480       0.000000       0.121350   -9999.000000   -9999.000000       0.044000       0.016000
53669     53669     shanxi         111.8167       38.0667           88       167     2012      12        25        360              0.084500      -9.674652       0.000000       0.122321   -9999.000000   -9999.000000       0.036200       0.051000
53669     53669     shanxi         111.8167       38.0667           88       167     2012      12        26        361              0.000000      -8.144836       0.000000       0.123014   -9999.000000   -9999.000000       0.039500   -9999.000000
53669     53669     shanxi         111.8167       38.0667           88       167     2012      12        27        362              0.084769      -7.229980       0.000000       0.128876   -9999.000000   -9999.000000       0.043000       0.037000
53669     53669     shanxi         111.8167       38.0667           88       167     2012      12        28        363              0.085000      -6.692444       0.000000       0.131064   -9999.000000   -9999.000000       0.037100       0.035000
53669     53669     shanxi         111.8167       38.0667           88       167     2012      12        29        364              0.000000      -8.279053       0.000000       0.127030   -9999.000000   -9999.000000   -9999.000000       0.041000
53669     53669     shanxi         111.8167       38.0667           88       167     2012      12        30        365              0.000000     -11.451538       0.000000       0.124316   -9999.000000   -9999.000000       0.037900       0.058000
53669     53669     shanxi         111.8167       38.0667           88       167     2012      12        31        366              0.084533      -9.545227       0.000000       0.124452   -9999.000000   -9999.000000       0.038300   -9999.000000
