# Supplementary material for: Research on Fusing Multisatellite Soil Moisture Data Based on Bayesian Model Averaging
Source: Hindawi journal article supplement (doi:10.1155/2018/9310838), 2018-06-25
Supplement: f1 [file 9310838.f1.zip › 2012_sm00-10cm_daily_ZDB_ZHY_53673_366days_allin.txt]

53673     53673     shanxi         112.7197       38.7661           85       171     2012      01        01        001              0.000000   -9999.000000       0.000000   -9999.000000   -9999.000000   -9999.000000       0.024800   -9999.000000
53673     53673     shanxi         112.7197       38.7661           85       171     2012      01        02        002              0.053292      -6.669281       0.000000       0.133034   -9999.000000   -9999.000000       0.021400       0.056000
53673     53673     shanxi         112.7197       38.7661           85       171     2012      01        03        003              0.000000      -7.256989       0.000000       0.134012   -9999.000000   -9999.000000   -9999.000000       0.073000
53673     53673     shanxi         112.7197       38.7661           85       171     2012      01        04        004              0.048458      -8.850250       0.000000       0.130479   -9999.000000   -9999.000000       0.025200   -9999.000000
53673     53673     shanxi         112.7197       38.7661           85       171     2012      01        05        005              0.046667      -9.249023       0.000000       0.129925   -9999.000000   -9999.000000       0.022000       0.121000
53673     53673     shanxi         112.7197       38.7661           85       171     2012      01        06        006              0.046125      -8.584442       0.000000       0.130668   -9999.000000   -9999.000000       0.021600       0.053000
53673     53673     shanxi         112.7197       38.7661           85       171     2012      01        07        007              0.047750      -7.815033       0.000000       0.131722   -9999.000000   -9999.000000       0.027200       0.141000
53673     53673     shanxi         112.7197       38.7661           85       171     2012      01        08        008              0.000000      -7.054474       0.000000       0.131942   -9999.000000   -9999.000000       0.021900       0.058000
53673     53673     shanxi         112.7197       38.7661           85       171     2012      01        09        009              0.047792      -6.297791       0.000000       0.142827   -9999.000000   -9999.000000   -9999.000000   -9999.000000
53673     53673     shanxi         112.7197       38.7661           85       171     2012      01        10        010              0.048167      -5.519257       0.000000       0.147211   -9999.000000   -9999.000000       0.025000       0.172000
53673     53673     shanxi         112.7197       38.7661           85       171     2012      01        11        011              0.046708      -5.611298       0.000000       0.148482   -9999.000000   -9999.000000       0.024200       0.078000
53673     53673     shanxi         112.7197       38.7661           85       171     2012      01        12        012              0.046000      -7.137421       0.000000       0.140607   -9999.000000   -9999.000000       0.027700       0.083000
53673     53673     shanxi         112.7197       38.7661           85       171     2012      01        13        013              0.046125      -5.946594       0.000000       0.144118   -9999.000000   -9999.000000       0.025400       0.108000
53673     53673     shanxi         112.7197       38.7661           85       171     2012      01        14        014              0.047167      -5.016113       0.000000       0.152970   -9999.000000   -9999.000000       0.027600       0.093000
53673     53673     shanxi         112.7197       38.7661           85       171     2012      01        15        015              0.047042      -4.443085       0.000000       0.154964   -9999.000000   -9999.000000       0.029200       0.058000
53673     53673     shanxi         112.7197       38.7661           85       171     2012      01        16        016              0.046958      -4.701843       0.000000       0.155837   -9999.000000   -9999.000000       0.030900       0.081000
53673     53673     shanxi         112.7197       38.7661           85       171     2012      01        17        017              0.000000      -5.676239       0.000000       0.147102   -9999.000000   -9999.000000       0.024900       0.089000
53673     53673     shanxi         112.7197       38.7661           85       171     2012      01        18        018              0.048000      -5.375397       0.000000       0.150746   -9999.000000   -9999.000000       0.030500   -9999.000000
53673     53673     shanxi         112.7197       38.7661           85       171     2012      01        19        019              0.049208      -4.379211       0.000000       0.156111   -9999.000000   -9999.000000       0.027700       0.192000
53673     53673     shanxi         112.7197       38.7661           85       171     2012      01        20        020              0.050000      -3.077271       0.000000       0.166421   -9999.000000   -9999.000000   -9999.000000       0.083000
53673     53673     shanxi         112.7197       38.7661           85       171     2012      01        21        021              0.049292      -7.959778       0.000000       0.139507   -9999.000000   -9999.000000       0.023500       0.046000
53673     53673     shanxi         112.7197       38.7661           85       171     2012      01        22        022              0.046500     -10.537659       0.000000       0.133227   -9999.000000   -9999.000000       0.022700       0.057000
53673     53673     shanxi         112.7197       38.7661           85       171     2012      01        23        023              0.045000     -10.341064       0.000000       0.130854   -9999.000000   -9999.000000       0.023000   -9999.000000
53673     53673     shanxi         112.7197       38.7661           85       171     2012      01        24        024              0.044652      -9.552521       0.000000       0.130457   -9999.000000   -9999.000000   -9999.000000       0.076000
53673     53673     shanxi         112.7197       38.7661           85       171     2012      01        25        025              0.044000      -9.765717       0.000000       0.130512   -9999.000000   -9999.000000       0.024500       0.120000
53673     53673     shanxi         112.7197       38.7661           85       171     2012      01        26        026              0.044167      -8.524658       0.000000       0.133450   -9999.000000   -9999.000000       0.026200       0.066000
53673     53673     shanxi         112.7197       38.7661           85       171     2012      01        27        027              0.044667      -6.531555       0.000000       0.142166   -9999.000000   -9999.000000       0.029500       0.044000
53673     53673     shanxi         112.7197       38.7661           85       171     2012      01        28        028              0.046000      -4.921234       0.000000       0.154793   -9999.000000   -9999.000000       0.025300   -9999.000000
53673     53673     shanxi         112.7197       38.7661           85       171     2012      01        29        029              0.046833      -4.371155       0.000000       0.157780   -9999.000000   -9999.000000       0.033300       0.106000
53673     53673     shanxi         112.7197       38.7661           85       171     2012      01        30        030              0.046250      -4.705383       0.000000       0.159838   -9999.000000   -9999.000000       0.032300       0.159000
53673     53673     shanxi         112.7197       38.7661           85       171     2012      01        31        031              0.046750      -4.277008       0.000000       0.159974   -9999.000000   -9999.000000   -9999.000000       0.131000
53673     53673     shanxi         112.7197       38.7661           85       171     2012      02        01        032              0.044708      -4.396545       0.000000       0.163758   -9999.000000   -9999.000000       0.035400       0.075000
53673     53673     shanxi         112.7197       38.7661           85       171     2012      02        02        033              0.042875      -7.440796       0.000000       0.139116   -9999.000000   -9999.000000       0.038300   -9999.000000
53673     53673     shanxi         112.7197       38.7661           85       171     2012      02        03        034              0.043375      -6.872955       0.000000       0.142890   -9999.000000   -9999.000000       0.034100       0.125000
53673     53673     shanxi         112.7197       38.7661           85       171     2012      02        04        035              0.044375      -5.175842       0.000000       0.153518   -9999.000000   -9999.000000       0.037700       0.158000
53673     53673     shanxi         112.7197       38.7661           85       171     2012      02        05        036              0.046208      -5.160095       0.000000       0.149919   -9999.000000   -9999.000000       0.036300       0.077000
53673     53673     shanxi         112.7197       38.7661           85       171     2012      02        06        037              0.044500      -2.495544       8.158578       0.174017   -9999.000000   -9999.000000   -9999.000000       0.100000
53673     53673     shanxi         112.7197       38.7661           85       171     2012      02        07        038              0.042667      -7.837524       0.000000       0.140071   -9999.000000   -9999.000000       0.038800   -9999.000000
53673     53673     shanxi         112.7197       38.7661           85       171     2012      02        08        039              0.042208      -7.929810       0.000000       0.134469   -9999.000000   -9999.000000       0.033700       0.121000
53673     53673     shanxi         112.7197       38.7661           85       171     2012      02        09        040              0.043125      -6.589050       0.000000       0.142444   -9999.000000   -9999.000000       0.040800       0.109000
53673     53673     shanxi         112.7197       38.7661           85       171     2012      02        10        041              0.043458      -6.466827       0.000000       0.142170   -9999.000000   -9999.000000       0.041100       0.142000
53673     53673     shanxi         112.7197       38.7661           85       171     2012      02        11        042              0.044792      -5.296631       0.000000       0.157414   -9999.000000   -9999.000000       0.034000       0.032000
53673     53673     shanxi         112.7197       38.7661           85       171     2012      02        12        043              0.045958      -3.487335       0.000000       0.168506   -9999.000000   -9999.000000   -9999.000000       0.101000
53673     53673     shanxi         112.7197       38.7661           85       171     2012      02        13        044              0.050458      -4.498322       0.022726       0.154977       0.078000   -9999.000000   -9999.000000       0.112000
53673     53673     shanxi         112.7197       38.7661           85       171     2012      02        14        045              0.054083      -1.163147       0.000000       0.187605   -9999.000000   -9999.000000       0.042700       0.122000
53673     53673     shanxi         112.7197       38.7661           85       171     2012      02        15        046              0.051083      -1.626068       0.000000       0.185855   -9999.000000   -9999.000000       0.044300       0.181000
53673     53673     shanxi         112.7197       38.7661           85       171     2012      02        16        047              0.045875      -2.787018       0.000000       0.178742   -9999.000000   -9999.000000       0.036300   -9999.000000
53673     53673     shanxi         112.7197       38.7661           85       171     2012      02        17        048              0.044708      -4.439240       0.000000       0.162616   -9999.000000   -9999.000000   -9999.000000       0.130000
53673     53673     shanxi         112.7197       38.7661           85       171     2012      02        18        049              0.044667      -5.198517       2.653143       0.154318   -9999.000000   -9999.000000       0.042800       0.132000
53673     53673     shanxi         112.7197       38.7661           85       171     2012      02        19        050              0.044958      -3.948059       0.097374       0.169702   -9999.000000   -9999.000000       0.042200       0.097000
53673     53673     shanxi         112.7197       38.7661           85       171     2012      02        20        051              0.048833      -3.165924       0.000000       0.178078       0.084000   -9999.000000       0.043400       0.189000
53673     53673     shanxi         112.7197       38.7661           85       171     2012      02        21        052              0.052583      -0.171204       0.000000       0.196387   -9999.000000   -9999.000000   -9999.000000   -9999.000000
53673     53673     shanxi         112.7197       38.7661           85       171     2012      02        22        053              0.058667       1.419403       0.000000       0.209962   -9999.000000   -9999.000000       0.049200       0.186000
53673     53673     shanxi         112.7197       38.7661           85       171     2012      02        23        054              0.059458       1.844879       0.000000       0.212163       0.071000       0.061200   -9999.000000       0.224000
53673     53673     shanxi         112.7197       38.7661           85       171     2012      02        24        055              0.062000       1.018311       0.000000       0.207218   -9999.000000   -9999.000000       0.037300       0.142000
53673     53673     shanxi         112.7197       38.7661           85       171     2012      02        25        056              0.055458      -0.998596       0.000000       0.195502   -9999.000000   -9999.000000       0.040300       0.146000
53673     53673     shanxi         112.7197       38.7661           85       171     2012      02        26        057              0.056583      -2.949677       0.000000       0.171301   -9999.000000       0.034800       0.043900   -9999.000000
53673     53673     shanxi         112.7197       38.7661           85       171     2012      02        27        058              0.058833      -0.497925       0.000000       0.192358   -9999.000000       0.345000   -9999.000000       0.209000
53673     53673     shanxi         112.7197       38.7661           85       171     2012      02        28        059              0.062750       0.792419       0.000000       0.200358       0.076000       0.063900       0.045700       0.167000
53673     53673     shanxi         112.7197       38.7661           85       171     2012      02        29        060              0.000000   -9999.000000       0.000000   -9999.000000       0.086000   -9999.000000   -9999.000000   -9999.000000
53673     53673     shanxi         112.7197       38.7661           85       171     2012      03        01        061              0.077417       1.631866       0.000000       0.209517   -9999.000000   -9999.000000       0.043300       0.251000
53673     53673     shanxi         112.7197       38.7661           85       171     2012      03        02        062              0.083750       1.110077       0.000000       0.213717   -9999.000000   -9999.000000       0.042000   -9999.000000
53673     53673     shanxi         112.7197       38.7661           85       171     2012      03        03        063              0.083708       0.635437       0.000000       0.211329   -9999.000000   -9999.000000       0.045600       0.187000
53673     53673     shanxi         112.7197       38.7661           85       171     2012      03        04        064              0.089583      -0.445007       0.000000       0.196868       0.084000   -9999.000000       0.049200       0.230000
53673     53673     shanxi         112.7197       38.7661           85       171     2012      03        05        065              0.103583       0.688446       0.000000       0.206741       0.093000       0.059600   -9999.000000       0.255000
53673     53673     shanxi         112.7197       38.7661           85       171     2012      03        06        066              0.099458       0.289764       1.146559       0.202360       0.100000   -9999.000000       0.049200       0.116000
53673     53673     shanxi         112.7197       38.7661           85       171     2012      03        07        067              0.000000       1.374268       0.000000       0.213157       0.098000       0.092300       0.042000   -9999.000000
53673     53673     shanxi         112.7197       38.7661           85       171     2012      03        08        068              0.101125       1.399780       0.000000       0.209745   -9999.000000   -9999.000000       0.051800       0.240000
53673     53673     shanxi         112.7197       38.7661           85       171     2012      03        09        069              0.112292       0.758606       0.000000       0.203803   -9999.000000   -9999.000000       0.056500       0.333000
53673     53673     shanxi         112.7197       38.7661           85       171     2012      03        10        070              0.132625       2.512421       0.000000       0.221438       0.087000       0.042800       0.052200       0.185000
53673     53673     shanxi         112.7197       38.7661           85       171     2012      03        11        071              0.108208       0.513336       0.000000       0.202012       0.096000   -9999.000000   -9999.000000       0.073000
53673     53673     shanxi         112.7197       38.7661           85       171     2012      03        12        072              0.118583       0.593109       0.000000       0.196320       0.096000       0.074900       0.048300       0.217000
53673     53673     shanxi         112.7197       38.7661           85       171     2012      03        13        073              0.131917       2.712738       0.000000       0.209850   -9999.000000   -9999.000000       0.051300       0.297000
53673     53673     shanxi         112.7197       38.7661           85       171     2012      03        14        074              0.147542       4.454376       0.000000       0.219158   -9999.000000   -9999.000000   -9999.000000       0.351000
53673     53673     shanxi         112.7197       38.7661           85       171     2012      03        15        075              0.145083       5.155518       0.000000       0.221496   -9999.000000       0.179100       0.059700       0.429000
53673     53673     shanxi         112.7197       38.7661           85       171     2012      03        16        076              0.169417       3.006012       0.209403       0.225700       0.101000   -9999.000000       0.060200   -9999.000000
53673     53673     shanxi         112.7197       38.7661           85       171     2012      03        17        077              0.166292       6.699158       0.000000       0.235078       0.094000       0.094600       0.053900       0.350000
53673     53673     shanxi         112.7197       38.7661           85       171     2012      03        18        078              0.165542       7.597656       0.000000       0.234878   -9999.000000   -9999.000000       0.052700       0.403000
53673     53673     shanxi         112.7197       38.7661           85       171     2012      03        19        079              0.164250       5.110931       0.000000       0.226764   -9999.000000   -9999.000000       0.051600       0.417000
53673     53673     shanxi         112.7197       38.7661           85       171     2012      03        20        080              0.174792       3.177094       0.000000       0.225654       0.098000   -9999.000000       0.064200       0.472000
53673     53673     shanxi         112.7197       38.7661           85       171     2012      03        21        081              0.166417       5.848694       0.000000       0.233931   -9999.000000   -9999.000000       0.065100   -9999.000000
53673     53673     shanxi         112.7197       38.7661           85       171     2012      03        22        082              0.206208       3.322815       0.000000       0.234136   -9999.000000   -9999.000000   -9999.000000       0.752000
53673     53673     shanxi         112.7197       38.7661           85       171     2012      03        23        083              0.192792       3.576080       0.000000       0.233890   -9999.000000   -9999.000000       0.047000       0.411000
53673     53673     shanxi         112.7197       38.7661           85       171     2012      03        24        084              0.177792       3.413330       0.000000       0.223605   -9999.000000   -9999.000000   -9999.000000       0.471000
53673     53673     shanxi         112.7197       38.7661           85       171     2012      03        25        085              0.000000       7.268524       1.525522       0.230729       0.095000       0.195800       0.062700       0.373000
53673     53673     shanxi         112.7197       38.7661           85       171     2012      03        26        086              0.170792       8.612091       0.000000       0.229104       0.087000   -9999.000000       0.067900   -9999.000000
53673     53673     shanxi         112.7197       38.7661           85       171     2012      03        27        087              0.170625      10.077057       0.391964       0.226739       0.095000   -9999.000000       0.067400       0.529000
53673     53673     shanxi         112.7197       38.7661           85       171     2012      03        28        088              0.169875      11.167114       0.092799       0.220346       0.099000       0.014200       0.070200       0.681000
53673     53673     shanxi         112.7197       38.7661           85       171     2012      03        29        089              0.170708      12.087860       0.149320       0.217284   -9999.000000   -9999.000000       0.052600       0.485000
53673     53673     shanxi         112.7197       38.7661           85       171     2012      03        30        090              0.163417      11.305328       0.000000       0.212561   -9999.000000       0.144300       0.055600       0.335000
53673     53673     shanxi         112.7197       38.7661           85       171     2012      03        31        091              0.163958       7.371887       0.000000       0.211076       0.078000   -9999.000000       0.062500   -9999.000000
53673     53673     shanxi         112.7197       38.7661           85       171     2012      04        01        092              0.161875      10.412140       0.000000       0.207115       0.091000   -9999.000000       0.068400       0.444000
53673     53673     shanxi         112.7197       38.7661           85       171     2012      04        02        093              0.156417      10.251007       0.016526       0.205637       0.103000       0.174900       0.059400       0.411000
53673     53673     shanxi         112.7197       38.7661           85       171     2012      04        03        094              0.158250       5.600250       0.000000       0.203557   -9999.000000   -9999.000000       0.057300       0.359000
53673     53673     shanxi         112.7197       38.7661           85       171     2012      04        04        095              0.160500      10.068146       0.000000       0.203993   -9999.000000       0.130100       0.055000       0.361000
53673     53673     shanxi         112.7197       38.7661           85       171     2012      04        05        096              0.160417      11.910767       0.000000       0.198810       0.082000   -9999.000000       0.058400   -9999.000000
53673     53673     shanxi         112.7197       38.7661           85       171     2012      04        06        097              0.159667      12.035492       0.000000       0.194717       0.092000   -9999.000000       0.055500       0.471000
53673     53673     shanxi         112.7197       38.7661           85       171     2012      04        07        098              0.160458      13.294220       0.000000       0.190161       0.090000       0.014100       0.061000       0.494000
53673     53673     shanxi         112.7197       38.7661           85       171     2012      04        08        099              0.161000      15.393860       0.000000       0.185326       0.087500   -9999.000000   -9999.000000       0.475000
53673     53673     shanxi         112.7197       38.7661           85       171     2012      04        09        100              0.160875      16.161804       0.000000       0.181343       0.090000       0.095900       0.052500       0.380000
53673     53673     shanxi         112.7197       38.7661           85       171     2012      04        10        101              0.158250      17.466248       0.085564       0.179730       0.095000   -9999.000000       0.056500       0.413000
53673     53673     shanxi         112.7197       38.7661           85       171     2012      04        11        102              0.153208      14.643494       1.194223       0.181725       0.081000   -9999.000000       0.060900       0.410000
53673     53673     shanxi         112.7197       38.7661           85       171     2012      04        12        103              0.155750       9.428741       0.016289       0.191645       0.094000   -9999.000000       0.059200       0.448000
53673     53673     shanxi         112.7197       38.7661           85       171     2012      04        13        104              0.155208      13.118317       0.000000       0.199369       0.084000   -9999.000000       0.060500       0.512000
53673     53673     shanxi         112.7197       38.7661           85       171     2012      04        14        105              0.155958      15.805359       0.000000       0.189466       0.087000   -9999.000000       0.056000   -9999.000000
53673     53673     shanxi         112.7197       38.7661           85       171     2012      04        15        106              0.155708      17.377930       0.000000       0.182016   -9999.000000   -9999.000000       0.050500       0.450000
53673     53673     shanxi         112.7197       38.7661           85       171     2012      04        16        107              0.154208      16.968750       0.000000       0.177415       0.078500   -9999.000000       0.061400       0.574000
53673     53673     shanxi         112.7197       38.7661           85       171     2012      04        17        108              0.154167      16.373199       0.000000       0.174766       0.079000   -9999.000000       0.053500       0.570000
53673     53673     shanxi         112.7197       38.7661           85       171     2012      04        18        109              0.154208      17.900085       5.882052       0.173496       0.084000   -9999.000000   -9999.000000       0.651000
53673     53673     shanxi         112.7197       38.7661           85       171     2012      04        19        110              0.154292      16.348969       0.000000       0.229850       0.088000   -9999.000000       0.060700   -9999.000000
53673     53673     shanxi         112.7197       38.7661           85       171     2012      04        20        111              0.153833      16.617645       0.179004       0.227753       0.094000       0.189100       0.062800       0.502000
53673     53673     shanxi         112.7197       38.7661           85       171     2012      04        21        112              0.155167      17.508759       0.000000       0.210108       0.078000   -9999.000000       0.058100       0.519000
53673     53673     shanxi         112.7197       38.7661           85       171     2012      04        22        113              0.155417      18.019592       0.000000       0.198954       0.079000       0.152500       0.063700       0.566000
53673     53673     shanxi         112.7197       38.7661           85       171     2012      04        23        114              0.163792      20.822754      13.390308       0.188456       0.082000   -9999.000000       0.054400       0.514000
53673     53673     shanxi         112.7197       38.7661           85       171     2012      04        24        115              0.204833      21.883789       1.577954       0.225343   -9999.000000       0.450900       0.102100   -9999.000000
53673     53673     shanxi         112.7197       38.7661           85       171     2012      04        25        116              0.000000      12.415497       0.000000       0.284562   -9999.000000       0.140300   -9999.000000       0.676000
53673     53673     shanxi         112.7197       38.7661           85       171     2012      04        26        117              0.184792      11.624298       0.000000       0.256660       0.095500   -9999.000000       0.062400       0.624000
53673     53673     shanxi         112.7197       38.7661           85       171     2012      04        27        118              0.229542      17.252289       0.000000       0.237972       0.087500       0.202600   -9999.000000       0.440000
53673     53673     shanxi         112.7197       38.7661           85       171     2012      04        28        119              0.268375      17.044830       0.000000       0.222528       0.084000   -9999.000000       0.055000       0.479000
53673     53673     shanxi         112.7197       38.7661           85       171     2012      04        29        120              0.231917      18.246368       0.000000       0.211048       0.076000       0.260400       0.054700   -9999.000000
53673     53673     shanxi         112.7197       38.7661           85       171     2012      04        30        121              0.203917      20.098602       0.137598       0.200923       0.083000       0.247400       0.060200       0.474000
53673     53673     shanxi         112.7197       38.7661           85       171     2012      05        01        122              0.186083      22.403107       0.509981       0.193384       0.096500   -9999.000000       0.068800       0.633000
53673     53673     shanxi         112.7197       38.7661           85       171     2012      05        02        123              0.179208      19.250397       0.179252       0.199015       0.084000       0.186900       0.055900       0.480000
53673     53673     shanxi         112.7197       38.7661           85       171     2012      05        03        124              0.174000      21.847809       0.000000       0.190333       0.087000   -9999.000000       0.063100       0.405000
53673     53673     shanxi         112.7197       38.7661           85       171     2012      05        04        125              0.170333      23.566467       0.000000       0.181091       0.081000   -9999.000000       0.054100   -9999.000000
53673     53673     shanxi         112.7197       38.7661           85       171     2012      05        05        126              0.166583      24.635132       0.000000       0.175158       0.083000   -9999.000000       0.056600       0.480000
53673     53673     shanxi         112.7197       38.7661           85       171     2012      05        06        127              0.163875      23.734833       0.000000       0.171754       0.085000   -9999.000000   -9999.000000       0.516000
53673     53673     shanxi         112.7197       38.7661           85       171     2012      05        07        128              0.162208      25.528107       0.129262       0.170190   -9999.000000   -9999.000000       0.064600       0.531000
53673     53673     shanxi         112.7197       38.7661           85       171     2012      05        08        129              0.160958      26.067993       1.131294       0.171027       0.079000       0.041300       0.061100       0.312000
53673     53673     shanxi         112.7197       38.7661           85       171     2012      05        09        130              0.186375      26.556000       8.071095       0.174504       0.118000   -9999.000000       0.091400       1.000000
53673     53673     shanxi         112.7197       38.7661           85       171     2012      05        10        131              0.182250      18.621399       0.206929       0.269920   -9999.000000   -9999.000000       0.065400       0.616000
53673     53673     shanxi         112.7197       38.7661           85       171     2012      05        11        132              0.224375      23.570099       5.651853       0.234569       0.160000   -9999.000000       0.089900       0.787000
53673     53673     shanxi         112.7197       38.7661           85       171     2012      05        12        133              0.201500      17.254913       0.000000       0.273917       0.110500   -9999.000000   -9999.000000       0.473000
53673     53673     shanxi         112.7197       38.7661           85       171     2012      05        13        134              0.180375      16.720612       0.084870       0.245355       0.105000       0.216400       0.062800   -9999.000000
53673     53673     shanxi         112.7197       38.7661           85       171     2012      05        14        135              0.167667      17.680664       0.000000       0.226161       0.095000   -9999.000000       0.062600       0.401000
53673     53673     shanxi         112.7197       38.7661           85       171     2012      05        15        136              0.160250      17.467407       0.045897       0.211047       0.105000   -9999.000000       0.060700       0.447000
53673     53673     shanxi         112.7197       38.7661           85       171     2012      05        16        137              0.152208      19.377991       0.000000       0.199032       0.094000   -9999.000000       0.059000       0.382000
53673     53673     shanxi         112.7197       38.7661           85       171     2012      05        17        138              0.146625      19.756378       0.000000       0.189501       0.093000   -9999.000000       0.059300       0.522000
53673     53673     shanxi         112.7197       38.7661           85       171     2012      05        18        139              0.139375      23.234039       0.000000       0.180262       0.095000       0.171900       0.065500   -9999.000000
53673     53673     shanxi         112.7197       38.7661           85       171     2012      05        19        140              0.128875      25.193604       1.232280       0.175406       0.088000   -9999.000000       0.069700       0.392000
53673     53673     shanxi         112.7197       38.7661           85       171     2012      05        20        141              0.119250      25.905243       0.337622       0.184146       0.068000   -9999.000000       0.066300       0.473000
53673     53673     shanxi         112.7197       38.7661           85       171     2012      05        21        142              0.223625      23.565857       3.879600       0.188738       0.211000       0.078000       0.089400       0.411000
53673     53673     shanxi         112.7197       38.7661           85       171     2012      05        22        143              0.218208      17.420013       0.000000       0.225939       0.134500   -9999.000000       0.068200       0.371000
53673     53673     shanxi         112.7197       38.7661           85       171     2012      05        23        144              0.188250      19.818237       0.000000       0.217420   -9999.000000       0.094700   -9999.000000   -9999.000000
53673     53673     shanxi         112.7197       38.7661           85       171     2012      05        24        145              0.169375      19.740387       0.000000       0.198225       0.112000   -9999.000000       0.065500       0.428000
53673     53673     shanxi         112.7197       38.7661           85       171     2012      05        25        146              0.000000      21.944153       0.616615       0.184709       0.102000   -9999.000000       0.067900       0.480000
53673     53673     shanxi         112.7197       38.7661           85       171     2012      05        26        147              0.144625      20.630066       0.000000       0.185711       0.123000       0.036300       0.066200       0.374000
53673     53673     shanxi         112.7197       38.7661           85       171     2012      05        27        148              0.131750      24.230957       0.113722       0.174548       0.118000   -9999.000000       0.056800       0.410000
53673     53673     shanxi         112.7197       38.7661           85       171     2012      05        28        149              0.118417      26.348999       4.824253       0.168091       0.113000       0.143500       0.060800   -9999.000000
53673     53673     shanxi         112.7197       38.7661           85       171     2012      05        29        150              0.110375      26.899872       0.257441       0.178645       0.148000   -9999.000000   -9999.000000       0.631000
53673     53673     shanxi         112.7197       38.7661           85       171     2012      05        30        151              0.103792      21.282410       2.113066       0.218218       0.117000   -9999.000000       0.065500   -9999.000000
53673     53673     shanxi         112.7197       38.7661           85       171     2012      05        31        152              0.171125      21.052521      32.996281       0.193420       0.244000   -9999.000000   -9999.000000   -9999.000000
53673     53673     shanxi         112.7197       38.7661           85       171     2012      06        01        153              0.228875      16.833221       0.462562       0.313841       0.221000   -9999.000000       0.103400       1.000000
53673     53673     shanxi         112.7197       38.7661           85       171     2012      06        02        154              0.217208      19.236847       6.490988       0.304127   -9999.000000   -9999.000000       0.088900   -9999.000000
53673     53673     shanxi         112.7197       38.7661           85       171     2012      06        03        155              0.249375      20.364136       9.159886       0.296202       0.285000   -9999.000000       0.105800       1.000000
53673     53673     shanxi         112.7197       38.7661           85       171     2012      06        04        156              0.225000      19.235535       0.599447       0.325757       0.183000       0.250000       0.110100       0.718000
53673     53673     shanxi         112.7197       38.7661           85       171     2012      06        05        157              0.204333      22.339844       0.143793       0.293156       0.170000       0.284600       0.088700       0.526000
53673     53673     shanxi         112.7197       38.7661           85       171     2012      06        06        158              0.188958      23.763092       0.382568       0.276429       0.177000   -9999.000000       0.102500       0.453000
53673     53673     shanxi         112.7197       38.7661           85       171     2012      06        07        159              0.182542      20.700592       0.908377       0.274093       0.177000       0.157200       0.094900       0.526000
53673     53673     shanxi         112.7197       38.7661           85       171     2012      06        08        160              0.174583      20.447998       0.105511       0.272635       0.148000       0.103400       0.080800       0.558000
53673     53673     shanxi         112.7197       38.7661           85       171     2012      06        09        161              0.168250      23.157227       3.597034       0.258463   -9999.000000   -9999.000000   -9999.000000       0.538000
53673     53673     shanxi         112.7197       38.7661           85       171     2012      06        10        162              0.161000      21.943329       0.000000       0.271490       0.143500   -9999.000000       0.081300       0.479000
53673     53673     shanxi         112.7197       38.7661           85       171     2012      06        11        163              0.000000      20.556671      19.764046       0.251793       0.175000   -9999.000000       0.090900   -9999.000000
53673     53673     shanxi         112.7197       38.7661           85       171     2012      06        12        164              0.132292      22.195038       0.000000       0.235596       0.161000   -9999.000000       0.085000       0.483000
53673     53673     shanxi         112.7197       38.7661           85       171     2012      06        13        165              0.121833      23.354309       0.000000       0.223032       0.160000   -9999.000000       0.085700       0.518000
53673     53673     shanxi         112.7197       38.7661           85       171     2012      06        14        166              0.111458      22.771454       0.092738       0.214036       0.156000   -9999.000000       0.086700       0.496000
53673     53673     shanxi         112.7197       38.7661           85       171     2012      06        15        167              0.104417      20.792328       0.051580       0.209882       0.167000       0.147200   -9999.000000       0.505000
53673     53673     shanxi         112.7197       38.7661           85       171     2012      06        16        168              0.099750      22.534027       0.000000       0.203596       0.154000   -9999.000000       0.086100   -9999.000000
53673     53673     shanxi         112.7197       38.7661           85       171     2012      06        17        169              0.095583      25.273712       0.000000       0.192947       0.159000       0.155900       0.091600       0.503000
53673     53673     shanxi         112.7197       38.7661           85       171     2012      06        18        170              0.096792      27.643311       0.896600       0.184216       0.166000       0.127300       0.084900       0.559000
53673     53673     shanxi         112.7197       38.7661           85       171     2012      06        19        171              0.090458      28.393250       1.907609       0.187658   -9999.000000   -9999.000000       0.101500       0.533000
53673     53673     shanxi         112.7197       38.7661           85       171     2012      06        20        172              0.089792      24.631622       0.190671       0.208627       0.155000   -9999.000000       0.085400       0.514000
53673     53673     shanxi         112.7197       38.7661           85       171     2012      06        21        173              0.089167      23.184143       0.754393       0.207760       0.191000   -9999.000000       0.097800   -9999.000000
53673     53673     shanxi         112.7197       38.7661           85       171     2012      06        22        174              0.093208      23.410675       8.466086       0.206109       0.200000   -9999.000000       0.110400       0.623000
53673     53673     shanxi         112.7197       38.7661           85       171     2012      06        23        175              0.091083      24.794098       8.727577       0.251873       0.220000       0.255700       0.114100       0.729000
53673     53673     shanxi         112.7197       38.7661           85       171     2012      06        24        176              0.142625      24.129272      17.831127       0.283797       0.222500   -9999.000000       0.104300       0.864000
53673     53673     shanxi         112.7197       38.7661           85       171     2012      06        25        177              0.184292      21.985077       0.703809       0.326950       0.204000       0.315000       0.151700       0.820000
53673     53673     shanxi         112.7197       38.7661           85       171     2012      06        26        178              0.160875      23.479553       0.756325       0.303211       0.203500       0.451900   -9999.000000   -9999.000000
53673     53673     shanxi         112.7197       38.7661           85       171     2012      06        27        179              0.149875      23.871918       9.442352       0.284020       0.242000   -9999.000000       0.182400       0.743000
53673     53673     shanxi         112.7197       38.7661           85       171     2012      06        28        180              0.254792      20.319763      43.469597       0.296494       0.282000       0.354700       0.179600       1.000000
53673     53673     shanxi         112.7197       38.7661           85       171     2012      06        29        181              0.248917      18.565155       0.100432       0.361649       0.241000   -9999.000000       0.173800       1.000000
53673     53673     shanxi         112.7197       38.7661           85       171     2012      06        30        182              0.216542      22.303741       0.214061       0.346053       0.198000   -9999.000000       0.150900   -9999.000000
53673     53673     shanxi         112.7197       38.7661           85       171     2012      07        01        183              0.194833      24.672607       0.000000       0.321484       0.183000       0.116100       0.135200   -9999.000000
53673     53673     shanxi         112.7197       38.7661           85       171     2012      07        02        184              0.174917      25.654968       0.000000       0.307921       0.213000       0.369800       0.155700       0.759000
53673     53673     shanxi         112.7197       38.7661           85       171     2012      07        03        185              0.161500      25.105255       6.826486       0.295509       0.217000       0.215000       0.179600       0.960000
53673     53673     shanxi         112.7197       38.7661           85       171     2012      07        04        186              0.164500      23.827179       2.588714       0.309525       0.193000   -9999.000000       0.175400       0.777000
53673     53673     shanxi         112.7197       38.7661           85       171     2012      07        05        187              0.158875      23.720886       0.031279       0.307577       0.211000       0.242100       0.156900       0.716000
53673     53673     shanxi         112.7197       38.7661           85       171     2012      07        06        188              0.149333      25.860077       0.362233       0.297406   -9999.000000       0.122100       0.145600       0.612000
53673     53673     shanxi         112.7197       38.7661           85       171     2012      07        07        189              0.142917      26.671753       0.197154       0.287771   -9999.000000   -9999.000000       0.151100       0.677000
53673     53673     shanxi         112.7197       38.7661           85       171     2012      07        08        190              0.140333      24.568665       0.777394       0.283736       0.241000       0.106100       0.169700       0.674000
53673     53673     shanxi         112.7197       38.7661           85       171     2012      07        09        191              0.141208      24.386078       2.112810       0.281789       0.234000   -9999.000000       0.199800       0.659000
53673     53673     shanxi         112.7197       38.7661           85       171     2012      07        10        192              0.141792      23.642487       0.923390       0.290671   -9999.000000   -9999.000000       0.194900   -9999.000000
53673     53673     shanxi         112.7197       38.7661           85       171     2012      07        11        193              0.135792      24.524933       0.272000       0.282254       0.198000       0.226700       0.175700       0.615000
53673     53673     shanxi         112.7197       38.7661           85       171     2012      07        12        194              0.128708      25.964752       0.000000       0.268194       0.205000   -9999.000000       0.176400       0.614000
53673     53673     shanxi         112.7197       38.7661           85       171     2012      07        13        195              0.185667      25.787659       8.851991       0.258114       0.242000       0.139500   -9999.000000       0.631000
53673     53673     shanxi         112.7197       38.7661           85       171     2012      07        14        196              0.210417      23.830383       1.305345       0.295315       0.247000   -9999.000000       0.196200       0.716000
53673     53673     shanxi         112.7197       38.7661           85       171     2012      07        15        197              0.196667      21.677917       0.216864       0.293237       0.205500   -9999.000000       0.190100   -9999.000000
53673     53673     shanxi         112.7197       38.7661           85       171     2012      07        16        198              0.179292      24.835907       0.000000       0.276936       0.194000       0.383000       0.209600       0.554000
53673     53673     shanxi         112.7197       38.7661           85       171     2012      07        17        199              0.155208      24.734161       0.436520       0.262933       0.192000   -9999.000000       0.208200       0.510000
53673     53673     shanxi         112.7197       38.7661           85       171     2012      07        18        200              0.140542      25.040985       0.000000       0.253707       0.202000   -9999.000000       0.209800       0.568000
53673     53673     shanxi         112.7197       38.7661           85       171     2012      07        19        201              0.132208      25.225159       0.000000       0.246522       0.200000       0.132900       0.221400       0.501000
53673     53673     shanxi         112.7197       38.7661           85       171     2012      07        20        202              0.127261      26.303925       9.553769       0.234760       0.166000   -9999.000000       0.233400   -9999.000000
53673     53673     shanxi         112.7197       38.7661           85       171     2012      07        21        203              0.242348      27.250885      33.199726       0.251842   -9999.000000       0.502200       0.271100       1.000000
53673     53673     shanxi         112.7197       38.7661           85       171     2012      07        22        204              0.217000      21.464478       0.320071       0.359095       0.281000   -9999.000000       0.254400       0.874000
53673     53673     shanxi         112.7197       38.7661           85       171     2012      07        23        205              0.198833      23.133789       0.013523       0.317397       0.261000   -9999.000000       0.175200       0.829000
53673     53673     shanxi         112.7197       38.7661           85       171     2012      07        24        206              0.189875      23.924652       2.039804       0.303824       0.274000       0.320700   -9999.000000       0.702000
53673     53673     shanxi         112.7197       38.7661           85       171     2012      07        25        207              0.215583      24.339630       0.859460       0.298420       0.280000   -9999.000000       0.181400   -9999.000000
53673     53673     shanxi         112.7197       38.7661           85       171     2012      07        26        208              0.211667      23.540924       1.442930       0.303490       0.285500   -9999.000000       0.183400       0.892000
53673     53673     shanxi         112.7197       38.7661           85       171     2012      07        27        209              0.204391      24.436737       3.850174       0.299581   -9999.000000   -9999.000000       0.193600       0.818000
53673     53673     shanxi         112.7197       38.7661           85       171     2012      07        28        210              0.196833      23.348572       1.670832       0.300443       0.265000   -9999.000000       0.173500       0.876000
53673     53673     shanxi         112.7197       38.7661           85       171     2012      07        29        211              0.178875      25.533112       0.000000       0.305165       0.254000       0.226200       0.164600       0.539000
53673     53673     shanxi         112.7197       38.7661           85       171     2012      07        30        212              0.257500      26.427704      71.165718       0.286840   -9999.000000   -9999.000000   -9999.000000   -9999.000000
53673     53673     shanxi         112.7197       38.7661           85       171     2012      07        31        213              0.246875      20.989441       4.392774       0.384707       0.302000   -9999.000000       0.265800       0.998000
53673     53673     shanxi         112.7197       38.7661           85       171     2012      08        01        214              0.219833      20.504059       1.005403       0.360741       0.318000   -9999.000000       0.282300       0.903000
53673     53673     shanxi         112.7197       38.7661           85       171     2012      08        02        215              0.204250      22.905029       0.085766       0.343774       0.278000   -9999.000000       0.260400       0.792000
53673     53673     shanxi         112.7197       38.7661           85       171     2012      08        03        216              0.189625      24.679840       0.000000       0.330718       0.282000       0.300800       0.243100       0.822000
53673     53673     shanxi         112.7197       38.7661           85       171     2012      08        04        217              0.173792      25.118256       0.000000       0.321282       0.259000   -9999.000000       0.232000       0.949000
53673     53673     shanxi         112.7197       38.7661           85       171     2012      08        05        218              0.162083      25.793182       0.242055       0.312948       0.237500   -9999.000000       0.245900       0.653000
53673     53673     shanxi         112.7197       38.7661           85       171     2012      08        06        219              0.151250      24.478912       0.342383       0.308621       0.248500       0.112800       0.196000       0.711000
53673     53673     shanxi         112.7197       38.7661           85       171     2012      08        07        220              0.181000      25.837311      12.924813       0.304153       0.224000   -9999.000000   -9999.000000       0.793000
53673     53673     shanxi         112.7197       38.7661           85       171     2012      08        08        221              0.209000      26.255737       5.327030       0.336213       0.250000       0.111800       0.200200   -9999.000000
53673     53673     shanxi         112.7197       38.7661           85       171     2012      08        09        222              0.179542      24.055023       0.000000       0.332241       0.247000   -9999.000000       0.182900       0.763000
53673     53673     shanxi         112.7197       38.7661           85       171     2012      08        10        223              0.153333      25.131134       0.000000       0.312035       0.229000   -9999.000000   -9999.000000       0.599000
53673     53673     shanxi         112.7197       38.7661           85       171     2012      08        11        224              0.172125      24.200531      15.073447       0.302163       0.261000       0.293600       0.217900       0.673000
53673     53673     shanxi         112.7197       38.7661           85       171     2012      08        12        225              0.189833      20.718475       0.780817       0.336331       0.293000   -9999.000000       0.213700       0.748000
53673     53673     shanxi         112.7197       38.7661           85       171     2012      08        13        226              0.172833      23.226593       1.069353       0.325352       0.267000       0.302000       0.257900   -9999.000000
53673     53673     shanxi         112.7197       38.7661           85       171     2012      08        14        227              0.176174      22.829163       4.658438       0.314961       0.273000   -9999.000000       0.268800       1.000000
53673     53673     shanxi         112.7197       38.7661           85       171     2012      08        15        228              0.158500      20.271759       0.000000       0.326269       0.259000   -9999.000000       0.242800       0.749000
53673     53673     shanxi         112.7197       38.7661           85       171     2012      08        16        229              0.138792      21.768524       1.977145       0.309635       0.226500       0.104600   -9999.000000       0.746000
53673     53673     shanxi         112.7197       38.7661           85       171     2012      08        17        230              0.134000      23.138031       6.027457       0.303431   -9999.000000   -9999.000000       0.246800       0.882000
53673     53673     shanxi         112.7197       38.7661           85       171     2012      08        18        231              0.137000      20.374847       0.700464       0.323648       0.289000       0.128100       0.267500   -9999.000000
53673     53673     shanxi         112.7197       38.7661           85       171     2012      08        19        232              0.128875      20.689941       0.000000       0.315509       0.240000       0.155500       0.233900       0.832000
53673     53673     shanxi         112.7197       38.7661           85       171     2012      08        20        233              0.118500      22.978302       1.077176       0.303632       0.245000   -9999.000000       0.235200       0.743000
53673     53673     shanxi         112.7197       38.7661           85       171     2012      08        21        234              0.104667      22.066040       0.000000       0.301104       0.226500       0.285600       0.219000       0.695000
53673     53673     shanxi         112.7197       38.7661           85       171     2012      08        22        235              0.096250      19.029541       0.000000       0.290532       0.231000   -9999.000000       0.228000   -9999.000000
53673     53673     shanxi         112.7197       38.7661           85       171     2012      08        23        236              0.092417      19.758789       0.657083       0.284949       0.226000   -9999.000000       0.224700   -9999.000000
53673     53673     shanxi         112.7197       38.7661           85       171     2012      08        24        237              0.089542      20.285522       0.000000       0.280547       0.198000       0.150400       0.238400       0.657000
53673     53673     shanxi         112.7197       38.7661           85       171     2012      08        25        238              0.000000      21.561127       0.000000       0.275765       0.273000   -9999.000000       0.218800       0.634000
53673     53673     shanxi         112.7197       38.7661           85       171     2012      08        26        239              0.082083      22.424652       0.231190       0.271683       0.245000       0.101800       0.220100       0.529000
53673     53673     shanxi         112.7197       38.7661           85       171     2012      08        27        240              0.079708      23.329468      11.171772       0.267615       0.241000   -9999.000000   -9999.000000       0.837000
53673     53673     shanxi         112.7197       38.7661           85       171     2012      08        28        241              0.078167      21.688263       0.507585       0.311633       0.231000       0.179300       0.209100   -9999.000000
53673     53673     shanxi         112.7197       38.7661           85       171     2012      08        29        242              0.076625      22.457153       0.000000       0.298159       0.228000       0.148000       0.214100       0.513000
53673     53673     shanxi         112.7197       38.7661           85       171     2012      08        30        243              0.075042      23.284546       0.000000       0.283192       0.253000   -9999.000000       0.195000       0.614000
53673     53673     shanxi         112.7197       38.7661           85       171     2012      08        31        244              0.073875      23.454437       0.564593       0.274854       0.244000       0.148500       0.197100       0.595000
53673     53673     shanxi         112.7197       38.7661           85       171     2012      09        01        245              0.198208      22.450470      37.986931       0.275448       0.262000   -9999.000000       0.245200       0.986000
53673     53673     shanxi         112.7197       38.7661           85       171     2012      09        02        246              0.215583      18.029297       0.000000       0.361511       0.281500       0.283500       0.249800       0.924000
53673     53673     shanxi         112.7197       38.7661           85       171     2012      09        03        247              0.187917      17.787048       0.883088       0.330655       0.260000       0.278800       0.207700       0.730000
53673     53673     shanxi         112.7197       38.7661           85       171     2012      09        04        248              0.164833      16.129089       0.000000       0.319888       0.210500       0.334700       0.218700       0.789000
53673     53673     shanxi         112.7197       38.7661           85       171     2012      09        05        249              0.150583      17.015625       0.663814       0.309859       0.242000       0.235700       0.200600       0.679000
53673     53673     shanxi         112.7197       38.7661           85       171     2012      09        06        250              0.145583      19.100159       3.646353       0.305066       0.232500   -9999.000000       0.208500   -9999.000000
53673     53673     shanxi         112.7197       38.7661           85       171     2012      09        07        251              0.136583      17.307739       0.000000       0.315927       0.230000   -9999.000000       0.207000       0.766000
53673     53673     shanxi         112.7197       38.7661           85       171     2012      09        08        252              0.121042      18.976379       0.000000       0.306459       0.232000       0.267200       0.204900       0.678000
53673     53673     shanxi         112.7197       38.7661           85       171     2012      09        09        253              0.107250      19.478302       0.000000       0.298475       0.213000   -9999.000000       0.198100       0.726000
53673     53673     shanxi         112.7197       38.7661           85       171     2012      09        10        254              0.099833      20.201843       0.045725       0.291893       0.232000   -9999.000000       0.185500       0.604000
53673     53673     shanxi         112.7197       38.7661           85       171     2012      09        11        255              0.093208      19.077728       0.033569       0.290117       0.200000       0.130800       0.173400   -9999.000000
53673     53673     shanxi         112.7197       38.7661           85       171     2012      09        12        256              0.083125      18.255463       0.041775       0.285834       0.202500   -9999.000000       0.179200       0.534000
53673     53673     shanxi         112.7197       38.7661           85       171     2012      09        13        257              0.077875      13.565063       1.994941       0.283734       0.201000       0.393200   -9999.000000       0.684000
53673     53673     shanxi         112.7197       38.7661           85       171     2012      09        14        258              0.074292      14.081818       0.000000       0.290107       0.193000   -9999.000000       0.174300       0.709000
53673     53673     shanxi         112.7197       38.7661           85       171     2012      09        15        259              0.072875      15.252319       0.000000       0.284797       0.202000       0.348300       0.186000       0.520000
53673     53673     shanxi         112.7197       38.7661           85       171     2012      09        16        260              0.071583      16.504639       0.000000       0.279883       0.214000       0.368800       0.173300   -9999.000000
53673     53673     shanxi         112.7197       38.7661           85       171     2012      09        17        261              0.070208      17.102020       1.319352       0.276518       0.190000   -9999.000000       0.157700       0.510000
53673     53673     shanxi         112.7197       38.7661           85       171     2012      09        18        262              0.068958      16.810883       0.646805       0.275283       0.198000       0.145300       0.162500       0.566000
53673     53673     shanxi         112.7197       38.7661           85       171     2012      09        19        263              0.067667      16.985291       0.066042       0.276197       0.188000   -9999.000000       0.168300       0.694000
53673     53673     shanxi         112.7197       38.7661           85       171     2012      09        20        264              0.067792      17.423218       5.981664       0.273019       0.180000   -9999.000000       0.160800       0.485000
53673     53673     shanxi         112.7197       38.7661           85       171     2012      09        21        265              0.142042      18.239960      20.803514       0.278547   -9999.000000       0.106500       0.184500   -9999.000000
53673     53673     shanxi         112.7197       38.7661           85       171     2012      09        22        266              0.159875      14.274506       0.000000       0.347559       0.189000   -9999.000000       0.184600       0.899000
53673     53673     shanxi         112.7197       38.7661           85       171     2012      09        23        267              0.145500      16.972992       0.042628       0.317987       0.185500   -9999.000000       0.184600       0.692000
53673     53673     shanxi         112.7197       38.7661           85       171     2012      09        24        268              0.138167      18.225922       2.872291       0.307631       0.192000   -9999.000000   -9999.000000       0.726000
53673     53673     shanxi         112.7197       38.7661           85       171     2012      09        25        269              0.212783      17.378723      20.610067       0.310375   -9999.000000   -9999.000000       0.159500       0.861000
53673     53673     shanxi         112.7197       38.7661           85       171     2012      09        26        270              0.202750      12.793579       1.204347       0.353856       0.212000       0.185700       0.160100   -9999.000000
53673     53673     shanxi         112.7197       38.7661           85       171     2012      09        27        271              0.186286      15.143494       0.000000       0.327470       0.223000   -9999.000000       0.155600       0.843000
53673     53673     shanxi         112.7197       38.7661           85       171     2012      09        28        272              0.156867      13.337311       0.000000       0.316400       0.196000   -9999.000000       0.146900       0.683000
53673     53673     shanxi         112.7197       38.7661           85       171     2012      09        29        273              0.146875      12.541779       0.392491       0.310448       0.200500   -9999.000000       0.156700       0.631000
53673     53673     shanxi         112.7197       38.7661           85       171     2012      09        30        274              0.138333      12.542786       0.054422       0.306624       0.187000       0.176300   -9999.000000       0.538000
53673     53673     shanxi         112.7197       38.7661           85       171     2012      10        01        275              0.130667      13.311218       0.000000       0.303674       0.136500       0.147400       0.112500       0.686000
53673     53673     shanxi         112.7197       38.7661           85       171     2012      10        02        276              0.125708      14.148468       0.000000       0.299774       0.146000   -9999.000000       0.119000       0.610000
53673     53673     shanxi         112.7197       38.7661           85       171     2012      10        03        277              0.119042      14.774872       0.000000       0.297628       0.149000       0.163000       0.117900       0.722000
53673     53673     shanxi         112.7197       38.7661           85       171     2012      10        04        278              0.114625      14.889679       1.057459       0.293902       0.162000       0.097000       0.127500       0.636000
53673     53673     shanxi         112.7197       38.7661           85       171     2012      10        05        279              0.110042      11.428467       1.180022       0.298531       0.175000       0.360000       0.129500   -9999.000000
53673     53673     shanxi         112.7197       38.7661           85       171     2012      10        06        280              0.105958      11.532715       0.954988       0.300415       0.161000   -9999.000000       0.119300       0.626000
53673     53673     shanxi         112.7197       38.7661           85       171     2012      10        07        281              0.104958      13.403778       1.003242       0.298331       0.152000   -9999.000000       0.115000       0.647000
53673     53673     shanxi         112.7197       38.7661           85       171     2012      10        08        282              0.105083      13.475372       0.679245       0.297344       0.163000   -9999.000000       0.110500       0.652000
53673     53673     shanxi         112.7197       38.7661           85       171     2012      10        09        283              0.103667      14.805908       0.000000       0.295330       0.154500       0.055500       0.101200       0.520000
53673     53673     shanxi         112.7197       38.7661           85       171     2012      10        10        284              0.100917      11.485809       0.000000       0.290469       0.153000   -9999.000000       0.106100   -9999.000000
53673     53673     shanxi         112.7197       38.7661           85       171     2012      10        11        285              0.100435      11.041901       0.000000       0.288082       0.122000   -9999.000000   -9999.000000       0.569000
53673     53673     shanxi         112.7197       38.7661           85       171     2012      10        12        286              0.100458      12.324005       0.000000       0.286485       0.122000   -9999.000000       0.098200       0.598000
53673     53673     shanxi         112.7197       38.7661           85       171     2012      10        13        287              0.099625      13.122070       0.000000       0.284282       0.124000   -9999.000000       0.097600       0.608000
53673     53673     shanxi         112.7197       38.7661           85       171     2012      10        14        288              0.099958      11.932404       0.000000       0.281851       0.118500       0.172900       0.098600       0.492000
53673     53673     shanxi         112.7197       38.7661           85       171     2012      10        15        289              0.109125      11.975372       7.501050       0.281355       0.133000       0.177200       0.101200   -9999.000000
53673     53673     shanxi         112.7197       38.7661           85       171     2012      10        16        290              0.158458       8.297180       3.212142       0.304299       0.175000   -9999.000000       0.125200       0.857000
53673     53673     shanxi         112.7197       38.7661           85       171     2012      10        17        291              0.150250       7.370270       0.140635       0.304322       0.157000       0.081800   -9999.000000       0.654000
53673     53673     shanxi         112.7197       38.7661           85       171     2012      10        18        292              0.162250       7.450958       0.000000       0.295730   -9999.000000   -9999.000000       0.097900       0.689000
53673     53673     shanxi         112.7197       38.7661           85       171     2012      10        19        293              0.159917       7.518311       0.000000       0.292883   -9999.000000       0.131900       0.103100       0.503000
53673     53673     shanxi         112.7197       38.7661           85       171     2012      10        20        294              0.158250       9.209045       0.126476       0.290212       0.133000   -9999.000000       0.099900   -9999.000000
53673     53673     shanxi         112.7197       38.7661           85       171     2012      10        21        295              0.162250      10.962189       2.475773       0.288514       0.149000   -9999.000000       0.112300       0.728000
53673     53673     shanxi         112.7197       38.7661           85       171     2012      10        22        296              0.161083       6.650818       0.000000       0.300371   -9999.000000       0.206500       0.090900       0.595000
53673     53673     shanxi         112.7197       38.7661           85       171     2012      10        23        297              0.157875       7.195465       0.000000       0.292410   -9999.000000   -9999.000000       0.089900       0.664000
53673     53673     shanxi         112.7197       38.7661           85       171     2012      10        24        298              0.155292       8.145264       0.000000       0.290148   -9999.000000       0.119600       0.082400       0.440000
53673     53673     shanxi         112.7197       38.7661           85       171     2012      10        25        299              0.000000       9.332001       0.664113       0.288171       0.118500   -9999.000000       0.085900   -9999.000000
53673     53673     shanxi         112.7197       38.7661           85       171     2012      10        26        300              0.153458       9.865021       0.033321       0.289406       0.124000       0.371100       0.083500       0.494000
53673     53673     shanxi         112.7197       38.7661           85       171     2012      10        27        301              0.150083       8.319366       0.000000       0.288662       0.126000       0.131400       0.089800       0.482000
53673     53673     shanxi         112.7197       38.7661           85       171     2012      10        28        302              0.000000       9.227539       0.000000       0.285709       0.112500   -9999.000000   -9999.000000       0.513000
53673     53673     shanxi         112.7197       38.7661           85       171     2012      10        29        303              0.143417       9.134613       0.000000       0.284003   -9999.000000       0.414800       0.067900       0.299000
53673     53673     shanxi         112.7197       38.7661           85       171     2012      10        30        304              0.136500       6.569397       0.000000       0.276838       0.120000   -9999.000000       0.068200       0.393000
53673     53673     shanxi         112.7197       38.7661           85       171     2012      10        31        305              0.134375       5.418579       0.000000       0.277469       0.113000   -9999.000000       0.071200       0.372000
53673     53673     shanxi         112.7197       38.7661           85       171     2012      11        01        306              0.131708       6.146576       0.000000       0.277156       0.108000       0.146700       0.073000       0.515000
53673     53673     shanxi         112.7197       38.7661           85       171     2012      11        02        307              0.132625       6.446655       0.000000       0.278504       0.109000   -9999.000000       0.076000       0.468000
53673     53673     shanxi         112.7197       38.7661           85       171     2012      11        03        308              0.186458       7.447723       0.292285       0.278713   -9999.000000   -9999.000000       0.064800   -9999.000000
53673     53673     shanxi         112.7197       38.7661           85       171     2012      11        04        309              0.163167       1.983612       0.000000       0.234720   -9999.000000   -9999.000000       0.065900       0.407000
53673     53673     shanxi         112.7197       38.7661           85       171     2012      11        05        310              0.146917      -0.934296       0.000000       0.190524       0.125000   -9999.000000       0.057700       0.427000
53673     53673     shanxi         112.7197       38.7661           85       171     2012      11        06        311              0.137708       1.361969       0.033583       0.232027       0.135000       0.111200       0.072200       0.531000
53673     53673     shanxi         112.7197       38.7661           85       171     2012      11        07        312              0.144000       3.074677       0.275754       0.257460       0.127000   -9999.000000       0.070900       0.384000
53673     53673     shanxi         112.7197       38.7661           85       171     2012      11        08        313              0.143875       3.418915       0.000000       0.257814   -9999.000000   -9999.000000   -9999.000000   -9999.000000
53673     53673     shanxi         112.7197       38.7661           85       171     2012      11        09        314              0.156792       3.418091       0.469355       0.259247   -9999.000000   -9999.000000       0.075200       0.456000
53673     53673     shanxi         112.7197       38.7661           85       171     2012      11        10        315              0.190375       2.682068       0.241106       0.268341   -9999.000000       0.178500       0.061200       0.450000
53673     53673     shanxi         112.7197       38.7661           85       171     2012      11        11        316              0.150250       0.328217       0.000000       0.222835   -9999.000000       0.035900       0.062600       0.347000
53673     53673     shanxi         112.7197       38.7661           85       171     2012      11        12        317              0.114792      -0.844971       0.093816       0.194832   -9999.000000   -9999.000000       0.065200       0.241000
53673     53673     shanxi         112.7197       38.7661           85       171     2012      11        13        318              0.000000       0.321655       0.000000       0.214845   -9999.000000       0.124400       0.063200   -9999.000000
53673     53673     shanxi         112.7197       38.7661           85       171     2012      11        14        319              0.069292      -0.263794       0.000000       0.205356   -9999.000000       0.103800   -9999.000000       0.406000
53673     53673     shanxi         112.7197       38.7661           85       171     2012      11        15        320              0.073458       0.603729       0.239257       0.214056   -9999.000000   -9999.000000       0.058000       0.243000
53673     53673     shanxi         112.7197       38.7661           85       171     2012      11        16        321              0.081792       0.413757       0.000000       0.215754   -9999.000000       0.102500       0.060100       0.361000
53673     53673     shanxi         112.7197       38.7661           85       171     2012      11        17        322              0.000000       0.298065       0.000000       0.213234       0.124000   -9999.000000       0.065300       0.226000
53673     53673     shanxi         112.7197       38.7661           85       171     2012      11        18        323              0.081875       0.863525       0.000000       0.218707       0.124000   -9999.000000       0.071000   -9999.000000
53673     53673     shanxi         112.7197       38.7661           85       171     2012      11        19        324              0.073208       1.576721       0.000000       0.231016   -9999.000000       0.027800       0.061100       0.391000
53673     53673     shanxi         112.7197       38.7661           85       171     2012      11        20        325              0.074250       1.146545       0.000000       0.221940   -9999.000000   -9999.000000       0.065100       0.294000
53673     53673     shanxi         112.7197       38.7661           85       171     2012      11        21        326              0.081917       1.189545       0.000000       0.226058       0.109000   -9999.000000       0.059100       0.340000
53673     53673     shanxi         112.7197       38.7661           85       171     2012      11        22        327              0.086417       2.182312       0.000000       0.244461   -9999.000000   -9999.000000       0.053100       0.106000
53673     53673     shanxi         112.7197       38.7661           85       171     2012      11        23        328              0.062333      -0.199493       0.000000       0.212806   -9999.000000       0.290100       0.060600   -9999.000000
53673     53673     shanxi         112.7197       38.7661           85       171     2012      11        24        329              0.053583      -1.573822       0.000000       0.189734       0.092000       0.067900       0.061700       0.149000
53673     53673     shanxi         112.7197       38.7661           85       171     2012      11        25        330              0.058042      -0.703522       0.000000       0.192469   -9999.000000   -9999.000000   -9999.000000       0.168000
53673     53673     shanxi         112.7197       38.7661           85       171     2012      11        26        331              0.050542      -1.516052       0.000000       0.184845   -9999.000000   -9999.000000   -9999.000000       0.157000
53673     53673     shanxi         112.7197       38.7661           85       171     2012      11        27        332              0.050500      -1.642456       0.000000       0.184802       0.094000       0.059600       0.054200       0.088000
53673     53673     shanxi         112.7197       38.7661           85       171     2012      11        28        333              0.046917      -0.680054       0.000000       0.197105   -9999.000000       0.222800       0.054300       0.128000
53673     53673     shanxi         112.7197       38.7661           85       171     2012      11        29        334              0.043625      -3.368439       0.000000       0.168333   -9999.000000       0.031400       0.052800       0.081000
53673     53673     shanxi         112.7197       38.7661           85       171     2012      11        30        335              0.043417      -3.357819       0.000000       0.167466   -9999.000000   -9999.000000       0.054100       0.153000
53673     53673     shanxi         112.7197       38.7661           85       171     2012      12        01        336              0.045458      -2.515686       0.000000       0.173087   -9999.000000       0.212100   -9999.000000       0.111000
53673     53673     shanxi         112.7197       38.7661           85       171     2012      12        02        337              0.046667      -3.908325       0.000000       0.153197   -9999.000000   -9999.000000       0.049300   -9999.000000
53673     53673     shanxi         112.7197       38.7661           85       171     2012      12        03        338              0.043125      -3.344666       0.000000       0.156800   -9999.000000   -9999.000000       0.055600       0.155000
53673     53673     shanxi         112.7197       38.7661           85       171     2012      12        04        339              0.042875      -4.335297       0.000000       0.158021   -9999.000000       0.069600       0.055000       0.129000
53673     53673     shanxi         112.7197       38.7661           85       171     2012      12        05        340              0.041250      -3.191406       0.000000       0.163116   -9999.000000   -9999.000000       0.054700       0.098000
53673     53673     shanxi         112.7197       38.7661           85       171     2012      12        06        341              0.041292      -6.288483       0.000000       0.143140   -9999.000000       0.347900       0.054900       0.050000
53673     53673     shanxi         112.7197       38.7661           85       171     2012      12        07        342              0.041958      -5.258057       0.092698       0.141258   -9999.000000   -9999.000000       0.049700   -9999.000000
53673     53673     shanxi         112.7197       38.7661           85       171     2012      12        08        343              0.039125      -6.177216       0.000000       0.145865   -9999.000000   -9999.000000       0.051600       0.111000
53673     53673     shanxi         112.7197       38.7661           85       171     2012      12        09        344              0.038958      -8.377655       0.000000       0.135501   -9999.000000   -9999.000000       0.051500       0.022000
53673     53673     shanxi         112.7197       38.7661           85       171     2012      12        10        345              0.039375      -5.901703       0.000000       0.143430   -9999.000000   -9999.000000       0.046700       0.136000
53673     53673     shanxi         112.7197       38.7661           85       171     2012      12        11        346              0.039208      -5.130646       0.000000       0.152619   -9999.000000   -9999.000000       0.049000       0.049000
53673     53673     shanxi         112.7197       38.7661           85       171     2012      12        12        347              0.039000      -5.707367       0.000000       0.144747   -9999.000000   -9999.000000   -9999.000000   -9999.000000
53673     53673     shanxi         112.7197       38.7661           85       171     2012      12        13        348              0.040292      -6.405060       0.117466       0.141153   -9999.000000   -9999.000000       0.046400       0.105000
53673     53673     shanxi         112.7197       38.7661           85       171     2012      12        14        349              0.043958      -6.209015       0.000000       0.138200   -9999.000000   -9999.000000       0.046500       0.004000
53673     53673     shanxi         112.7197       38.7661           85       171     2012      12        15        350              0.000000      -5.169525       0.000000       0.148629   -9999.000000   -9999.000000       0.044700       0.105000
53673     53673     shanxi         112.7197       38.7661           85       171     2012      12        16        351              0.048333      -4.158356       0.000000       0.150113   -9999.000000   -9999.000000       0.048300       0.030000
53673     53673     shanxi         112.7197       38.7661           85       171     2012      12        17        352              0.045625      -3.425507       0.000000       0.158233   -9999.000000       0.083100       0.044000   -9999.000000
53673     53673     shanxi         112.7197       38.7661           85       171     2012      12        18        353              0.043583      -5.855682       0.000000       0.146889   -9999.000000   -9999.000000       0.049200       0.055000
53673     53673     shanxi         112.7197       38.7661           85       171     2012      12        19        354              0.042750      -6.796204       0.000000       0.138487   -9999.000000   -9999.000000       0.046200       0.017000
53673     53673     shanxi         112.7197       38.7661           85       171     2012      12        20        355              0.000000      -6.243591       0.153925       0.138499   -9999.000000       0.054400       0.044500       0.022000
53673     53673     shanxi         112.7197       38.7661           85       171     2012      12        21        356              0.044917      -6.294098       0.114504       0.138266   -9999.000000   -9999.000000       0.044800   -9999.000000
53673     53673     shanxi         112.7197       38.7661           85       171     2012      12        22        357              0.042000      -6.642151       0.058855       0.139200   -9999.000000   -9999.000000       0.046600   -9999.000000
53673     53673     shanxi         112.7197       38.7661           85       171     2012      12        23        358              0.039000     -10.899353       0.000000       0.133557   -9999.000000   -9999.000000   -9999.000000       0.007000
53673     53673     shanxi         112.7197       38.7661           85       171     2012      12        24        359              0.037889     -13.650970       0.000000       0.128008   -9999.000000   -9999.000000       0.047900       0.041000
53673     53673     shanxi         112.7197       38.7661           85       171     2012      12        25        360              0.038333     -10.870728       0.000000       0.128509   -9999.000000   -9999.000000       0.047800       0.054000
53673     53673     shanxi         112.7197       38.7661           85       171     2012      12        26        361              0.000000      -9.424103       0.000000       0.129530   -9999.000000   -9999.000000       0.050100   -9999.000000
53673     53673     shanxi         112.7197       38.7661           85       171     2012      12        27        362              0.038091      -8.475006       0.000000       0.130408   -9999.000000   -9999.000000       0.047400       0.094000
53673     53673     shanxi         112.7197       38.7661           85       171     2012      12        28        363              0.000000      -8.175110       0.073282       0.130458   -9999.000000   -9999.000000       0.043800       0.038000
53673     53673     shanxi         112.7197       38.7661           85       171     2012      12        29        364              0.000000      -8.358032       0.026826       0.130805   -9999.000000   -9999.000000   -9999.000000       0.030000
53673     53673     shanxi         112.7197       38.7661           85       171     2012      12        30        365              0.000000     -10.615601       0.000000       0.130242   -9999.000000   -9999.000000       0.044800       0.075000
53673     53673     shanxi         112.7197       38.7661           85       171     2012      12        31        366              0.039000      -8.991028       0.053568       0.130173   -9999.000000   -9999.000000       0.041200   -9999.000000
