# Supplementary material for: Research on Fusing Multisatellite Soil Moisture Data Based on Bayesian Model Averaging
Source: Hindawi journal article supplement (doi:10.1155/2018/9310838), 2018-06-25
Supplement: f1 [file 9310838.f1.zip › 2012_sm00-10cm_daily_ZDB_ZHY_53681_366days_allin.txt]

53681     53681     shanxi         113.3644       38.8381           85       173     2012      01        01        001              0.000000   -9999.000000       0.000000   -9999.000000   -9999.000000   -9999.000000       0.030700   -9999.000000
53681     53681     shanxi         113.3644       38.8381           85       173     2012      01        02        002              0.158250      -8.577362       4.502072       0.125873   -9999.000000   -9999.000000       0.030400       0.198000
53681     53681     shanxi         113.3644       38.8381           85       173     2012      01        03        003              0.000000      -9.322327       0.000000       0.125618   -9999.000000   -9999.000000   -9999.000000       0.084000
53681     53681     shanxi         113.3644       38.8381           85       173     2012      01        04        004              0.157250     -11.214691       0.000000       0.123940   -9999.000000   -9999.000000       0.030300   -9999.000000
53681     53681     shanxi         113.3644       38.8381           85       173     2012      01        05        005              0.157250     -10.946838       0.000000       0.123221   -9999.000000   -9999.000000       0.029600       0.158000
53681     53681     shanxi         113.3644       38.8381           85       173     2012      01        06        006              0.157208     -10.562561       0.000000       0.123556   -9999.000000   -9999.000000       0.032100       0.025000
53681     53681     shanxi         113.3644       38.8381           85       173     2012      01        07        007              0.157458      -9.505768       2.160528       0.124873   -9999.000000   -9999.000000       0.036800       0.207000
53681     53681     shanxi         113.3644       38.8381           85       173     2012      01        08        008              0.000000      -9.047729       0.000000       0.124811   -9999.000000   -9999.000000       0.032000       0.153000
53681     53681     shanxi         113.3644       38.8381           85       173     2012      01        09        009              0.157542      -8.367828       0.000000       0.126825   -9999.000000   -9999.000000   -9999.000000   -9999.000000
53681     53681     shanxi         113.3644       38.8381           85       173     2012      01        10        010              0.157833      -7.951202       0.031587       0.128094   -9999.000000   -9999.000000       0.029700       0.045000
53681     53681     shanxi         113.3644       38.8381           85       173     2012      01        11        011              0.156833      -8.463501       0.000000       0.129046   -9999.000000   -9999.000000       0.032400       0.015000
53681     53681     shanxi         113.3644       38.8381           85       173     2012      01        12        012              0.157375      -9.812408       0.000000       0.124679   -9999.000000   -9999.000000       0.038300       0.107000
53681     53681     shanxi         113.3644       38.8381           85       173     2012      01        13        013              0.157500      -8.999237       0.000000       0.126160   -9999.000000   -9999.000000       0.037000       0.020000
53681     53681     shanxi         113.3644       38.8381           85       173     2012      01        14        014              0.158000      -7.992645       0.000000       0.129395   -9999.000000   -9999.000000       0.036600       0.125000
53681     53681     shanxi         113.3644       38.8381           85       173     2012      01        15        015              0.157708      -6.831207       0.000000       0.132371   -9999.000000   -9999.000000       0.036800       0.052000
53681     53681     shanxi         113.3644       38.8381           85       173     2012      01        16        016              0.157125      -7.613770       0.000000       0.131938   -9999.000000   -9999.000000       0.035400       0.065000
53681     53681     shanxi         113.3644       38.8381           85       173     2012      01        17        017              0.000000      -8.421112       0.000000       0.129408   -9999.000000   -9999.000000       0.031300       0.096000
53681     53681     shanxi         113.3644       38.8381           85       173     2012      01        18        018              0.157792      -8.459747       0.000000       0.129692   -9999.000000   -9999.000000       0.037100   -9999.000000
53681     53681     shanxi         113.3644       38.8381           85       173     2012      01        19        019              0.159167      -7.642059       0.113337       0.131394   -9999.000000   -9999.000000       0.036900       0.055000
53681     53681     shanxi         113.3644       38.8381           85       173     2012      01        20        020              0.158750      -6.115753       0.097006       0.135610   -9999.000000   -9999.000000   -9999.000000   -9999.000000
53681     53681     shanxi         113.3644       38.8381           85       173     2012      01        21        021              0.158000      -8.830841       0.411828       0.127524   -9999.000000   -9999.000000       0.029500       0.014000
53681     53681     shanxi         113.3644       38.8381           85       173     2012      01        22        022              0.156583     -12.475494       0.000000       0.124472   -9999.000000   -9999.000000       0.026400       0.038000
53681     53681     shanxi         113.3644       38.8381           85       173     2012      01        23        023              0.156333     -13.714172       0.000000       0.121879   -9999.000000   -9999.000000       0.035900   -9999.000000
53681     53681     shanxi         113.3644       38.8381           85       173     2012      01        24        024              0.155833     -12.611023       0.000000       0.121912   -9999.000000   -9999.000000   -9999.000000       0.113000
53681     53681     shanxi         113.3644       38.8381           85       173     2012      01        25        025              0.155667     -12.591736       0.000000       0.122023   -9999.000000   -9999.000000       0.032500       0.037000
53681     53681     shanxi         113.3644       38.8381           85       173     2012      01        26        026              0.156625     -10.830780       0.000000       0.122925   -9999.000000   -9999.000000       0.034600       0.012000
53681     53681     shanxi         113.3644       38.8381           85       173     2012      01        27        027              0.157250      -8.696075       0.000000       0.127791   -9999.000000   -9999.000000       0.032900       0.042000
53681     53681     shanxi         113.3644       38.8381           85       173     2012      01        28        028              0.158000      -7.246735       0.000000       0.135703   -9999.000000   -9999.000000       0.032800   -9999.000000
53681     53681     shanxi         113.3644       38.8381           85       173     2012      01        29        029              0.158083      -6.584991       0.000000       0.137243   -9999.000000   -9999.000000       0.037500       0.097000
53681     53681     shanxi         113.3644       38.8381           85       173     2012      01        30        030              0.158125      -7.303406       0.000000       0.136996   -9999.000000   -9999.000000       0.037300       0.002000
53681     53681     shanxi         113.3644       38.8381           85       173     2012      01        31        031              0.158792      -6.640808       0.000000       0.138036   -9999.000000   -9999.000000       0.034900       0.213000
53681     53681     shanxi         113.3644       38.8381           85       173     2012      02        01        032              0.156708      -5.248932       0.000000       0.155996   -9999.000000   -9999.000000       0.038000       0.025000
53681     53681     shanxi         113.3644       38.8381           85       173     2012      02        02        033              0.156750      -9.657349       0.000000       0.131149   -9999.000000   -9999.000000       0.038200   -9999.000000
53681     53681     shanxi         113.3644       38.8381           85       173     2012      02        03        034              0.157333      -8.867676       0.000000       0.129828   -9999.000000   -9999.000000       0.033400       0.152000
53681     53681     shanxi         113.3644       38.8381           85       173     2012      02        04        035              0.157292      -7.315338       0.000000       0.135885   -9999.000000   -9999.000000       0.041200       0.008000
53681     53681     shanxi         113.3644       38.8381           85       173     2012      02        05        036              0.159167      -7.160950       0.000000       0.135283   -9999.000000   -9999.000000       0.042600       0.148000
53681     53681     shanxi         113.3644       38.8381           85       173     2012      02        06        037              0.157500      -4.661621       4.237974       0.152611   -9999.000000   -9999.000000   -9999.000000       0.161000
53681     53681     shanxi         113.3644       38.8381           85       173     2012      02        07        038              0.156875     -10.078247       0.000000       0.131672   -9999.000000   -9999.000000       0.039600   -9999.000000
53681     53681     shanxi         113.3644       38.8381           85       173     2012      02        08        039              0.157292     -10.074585       0.000000       0.127275   -9999.000000   -9999.000000       0.038100       0.051000
53681     53681     shanxi         113.3644       38.8381           85       173     2012      02        09        040              0.156500      -8.955627       0.000000       0.130456   -9999.000000   -9999.000000       0.044200       0.022000
53681     53681     shanxi         113.3644       38.8381           85       173     2012      02        10        041              0.157542      -9.157471       0.000000       0.128207   -9999.000000   -9999.000000       0.044300       0.121000
53681     53681     shanxi         113.3644       38.8381           85       173     2012      02        11        042              0.158208      -7.607880       0.000000       0.137681   -9999.000000   -9999.000000       0.043300       0.116000
53681     53681     shanxi         113.3644       38.8381           85       173     2012      02        12        043              0.157333      -5.608337       0.000000       0.147938   -9999.000000   -9999.000000   -9999.000000       0.045000
53681     53681     shanxi         113.3644       38.8381           85       173     2012      02        13        044              0.161083      -6.674438       0.000000       0.136608       0.081000   -9999.000000   -9999.000000       0.040000
53681     53681     shanxi         113.3644       38.8381           85       173     2012      02        14        045              0.161000      -3.419495       0.000000       0.164075       0.088000   -9999.000000       0.043700       0.087000
53681     53681     shanxi         113.3644       38.8381           85       173     2012      02        15        046              0.159125      -3.575836       0.000000       0.166674   -9999.000000   -9999.000000       0.045300       0.168000
53681     53681     shanxi         113.3644       38.8381           85       173     2012      02        16        047              0.158917      -5.469147       0.000000       0.153052   -9999.000000   -9999.000000       0.045000       0.130000
53681     53681     shanxi         113.3644       38.8381           85       173     2012      02        17        048              0.158917      -6.889679       0.000000       0.141165   -9999.000000   -9999.000000       0.041900       0.074000
53681     53681     shanxi         113.3644       38.8381           85       173     2012      02        18        049              0.159250      -7.868469       3.684462       0.136875   -9999.000000   -9999.000000       0.045100       0.097000
53681     53681     shanxi         113.3644       38.8381           85       173     2012      02        19        050              0.159833      -6.983246       0.059569       0.144450       0.081000   -9999.000000       0.048700       0.099000
53681     53681     shanxi         113.3644       38.8381           85       173     2012      02        20        051              0.163250      -5.771973       0.000000       0.151311       0.086000   -9999.000000       0.047100       0.074000
53681     53681     shanxi         113.3644       38.8381           85       173     2012      02        21        052              0.167250      -2.205017       0.000000       0.177078   -9999.000000       0.042000   -9999.000000   -9999.000000
53681     53681     shanxi         113.3644       38.8381           85       173     2012      02        22        053              0.169667      -0.587616       0.000000       0.189476   -9999.000000   -9999.000000       0.057400       0.363000
53681     53681     shanxi         113.3644       38.8381           85       173     2012      02        23        054              0.168958       0.060547       0.757379       0.195245   -9999.000000       0.055200   -9999.000000       0.027000
53681     53681     shanxi         113.3644       38.8381           85       173     2012      02        24        055              0.165292      -0.877380       0.000000       0.185875   -9999.000000   -9999.000000       0.043200       0.194000
53681     53681     shanxi         113.3644       38.8381           85       173     2012      02        25        056              0.163333      -2.557922       0.000000       0.176113   -9999.000000   -9999.000000       0.045800       0.092000
53681     53681     shanxi         113.3644       38.8381           85       173     2012      02        26        057              0.167250      -4.160583       0.000000       0.156772   -9999.000000   -9999.000000       0.050200   -9999.000000
53681     53681     shanxi         113.3644       38.8381           85       173     2012      02        27        058              0.169042      -2.367828       0.000000       0.176870   -9999.000000   -9999.000000   -9999.000000       0.279000
53681     53681     shanxi         113.3644       38.8381           85       173     2012      02        28        059              0.172292      -1.392487       0.000000       0.181635       0.079000       0.084200       0.049900       0.045000
53681     53681     shanxi         113.3644       38.8381           85       173     2012      02        29        060              0.000000   -9999.000000       0.000000   -9999.000000       0.088000   -9999.000000   -9999.000000   -9999.000000
53681     53681     shanxi         113.3644       38.8381           85       173     2012      03        01        061              0.174417      -0.516479       0.050508       0.188185   -9999.000000   -9999.000000       0.044500       0.134000
53681     53681     shanxi         113.3644       38.8381           85       173     2012      03        02        062              0.177125      -0.304932       0.215786       0.191738       0.084000   -9999.000000       0.043900   -9999.000000
53681     53681     shanxi         113.3644       38.8381           85       173     2012      03        03        063              0.169792      -1.519958       0.378507       0.177005   -9999.000000   -9999.000000       0.046000       0.184000
53681     53681     shanxi         113.3644       38.8381           85       173     2012      03        04        064              0.173208      -3.090393       0.000000       0.160980       0.087000   -9999.000000       0.048200       0.065000
53681     53681     shanxi         113.3644       38.8381           85       173     2012      03        05        065              0.174833      -1.274384       0.352418       0.178949       0.090000       0.033100   -9999.000000       0.391000
53681     53681     shanxi         113.3644       38.8381           85       173     2012      03        06        066              0.179708      -2.224731       0.941230       0.177206       0.095000   -9999.000000       0.054400       0.127000
53681     53681     shanxi         113.3644       38.8381           85       173     2012      03        07        067              0.000000      -0.817749       0.000000       0.188779       0.096000       0.003400       0.054500   -9999.000000
53681     53681     shanxi         113.3644       38.8381           85       173     2012      03        08        068              0.175292      -0.420654       0.000000       0.190423   -9999.000000   -9999.000000       0.053900       0.046000
53681     53681     shanxi         113.3644       38.8381           85       173     2012      03        09        069              0.188167      -1.210358       0.521227       0.184937   -9999.000000   -9999.000000       0.063600       0.167000
53681     53681     shanxi         113.3644       38.8381           85       173     2012      03        10        070              0.207125       0.862305       0.000000       0.199357       0.082000       0.035300       0.064000       0.255000
53681     53681     shanxi         113.3644       38.8381           85       173     2012      03        11        071              0.188542      -1.745941       0.000000       0.183745       0.090000   -9999.000000   -9999.000000       0.226000
53681     53681     shanxi         113.3644       38.8381           85       173     2012      03        12        072              0.195708      -0.854340       0.000000       0.183101       0.091000       0.052800       0.050000       0.351000
53681     53681     shanxi         113.3644       38.8381           85       173     2012      03        13        073              0.202458       0.808411       0.000000       0.196542   -9999.000000   -9999.000000       0.055900       0.098000
53681     53681     shanxi         113.3644       38.8381           85       173     2012      03        14        074              0.212000       2.293793       0.000000       0.205009   -9999.000000   -9999.000000   -9999.000000       0.224000
53681     53681     shanxi         113.3644       38.8381           85       173     2012      03        15        075              0.198292       3.137970       0.496911       0.211817   -9999.000000       0.064000       0.066700       0.281000
53681     53681     shanxi         113.3644       38.8381           85       173     2012      03        16        076              0.232208       1.815918       0.170973       0.212011       0.091000   -9999.000000       0.070700       0.418000
53681     53681     shanxi         113.3644       38.8381           85       173     2012      03        17        077              0.236167       4.255676       0.000000       0.223990       0.094000       0.065700       0.058400       0.573000
53681     53681     shanxi         113.3644       38.8381           85       173     2012      03        18        078              0.237125       5.662079       0.082227       0.232001       0.098000   -9999.000000       0.055200       0.368000
53681     53681     shanxi         113.3644       38.8381           85       173     2012      03        19        079              0.237292       2.891663       0.103519       0.212086   -9999.000000   -9999.000000       0.062500       0.469000
53681     53681     shanxi         113.3644       38.8381           85       173     2012      03        20        080              0.239208       1.375244       0.000000       0.206304       0.092000       0.202700       0.075300       0.382000
53681     53681     shanxi         113.3644       38.8381           85       173     2012      03        21        081              0.235792       3.743591       0.277914       0.224085       0.101000   -9999.000000       0.078400   -9999.000000
53681     53681     shanxi         113.3644       38.8381           85       173     2012      03        22        082              0.254958       1.605774       0.535713       0.217369       0.113000   -9999.000000   -9999.000000       0.664000
53681     53681     shanxi         113.3644       38.8381           85       173     2012      03        23        083              0.243875       1.811401       1.039401       0.219495       0.100000   -9999.000000       0.061200       0.241000
53681     53681     shanxi         113.3644       38.8381           85       173     2012      03        24        084              0.230917       1.223907       0.078614       0.203774   -9999.000000   -9999.000000   -9999.000000       0.612000
53681     53681     shanxi         113.3644       38.8381           85       173     2012      03        25        085              0.000000       4.896912       0.141453       0.222270   -9999.000000       0.064900       0.063700       0.380000
53681     53681     shanxi         113.3644       38.8381           85       173     2012      03        26        086              0.210875       6.371735       0.000000       0.226281       0.087000   -9999.000000       0.071700   -9999.000000
53681     53681     shanxi         113.3644       38.8381           85       173     2012      03        27        087              0.206542       7.405701       0.000000       0.230789       0.092000   -9999.000000       0.081000       0.702000
53681     53681     shanxi         113.3644       38.8381           85       173     2012      03        28        088              0.208042       8.479584       0.259874       0.229558       0.097000       0.047400   -9999.000000       0.484000
53681     53681     shanxi         113.3644       38.8381           85       173     2012      03        29        089              0.220458       9.899445       0.116731       0.234925   -9999.000000   -9999.000000       0.062400       0.821000
53681     53681     shanxi         113.3644       38.8381           85       173     2012      03        30        090              0.218500       9.000092       0.116381       0.224944   -9999.000000       0.326100       0.067400       0.376000
53681     53681     shanxi         113.3644       38.8381           85       173     2012      03        31        091              0.219750       5.365845       0.000000       0.229168       0.082000   -9999.000000       0.069100   -9999.000000
53681     53681     shanxi         113.3644       38.8381           85       173     2012      04        01        092              0.219958       8.720642       0.000000       0.222370       0.090000   -9999.000000       0.081500       0.683000
53681     53681     shanxi         113.3644       38.8381           85       173     2012      04        02        093              0.216917       8.161011       0.000000       0.222664       0.096000       0.074800       0.082000       0.344000
53681     53681     shanxi         113.3644       38.8381           85       173     2012      04        03        094              0.216458       3.481720       0.000000       0.207798   -9999.000000   -9999.000000       0.073500       0.577000
53681     53681     shanxi         113.3644       38.8381           85       173     2012      04        04        095              0.217625       6.910553       0.000000       0.215448   -9999.000000       0.101100       0.065300       0.413000
53681     53681     shanxi         113.3644       38.8381           85       173     2012      04        05        096              0.217375       9.222229       0.000000       0.216394       0.079000   -9999.000000       0.078800   -9999.000000
53681     53681     shanxi         113.3644       38.8381           85       173     2012      04        06        097              0.216708       9.343231       0.000000       0.214511       0.089000   -9999.000000       0.070700       0.277000
53681     53681     shanxi         113.3644       38.8381           85       173     2012      04        07        098              0.216375       9.916870       0.000000       0.209267       0.090000       0.201400       0.078700       0.440000
53681     53681     shanxi         113.3644       38.8381           85       173     2012      04        08        099              0.215875      12.518860       0.000000       0.206107       0.076000   -9999.000000   -9999.000000       0.445000
53681     53681     shanxi         113.3644       38.8381           85       173     2012      04        09        100              0.214333      13.798279       0.000000       0.201026       0.075000       0.018600       0.067300       0.397000
53681     53681     shanxi         113.3644       38.8381           85       173     2012      04        10        101              0.212375      14.709808       0.257475       0.198726       0.088000       0.083400       0.078800       0.566000
53681     53681     shanxi         113.3644       38.8381           85       173     2012      04        11        102              0.211542      11.534637       0.201503       0.202528       0.081000   -9999.000000       0.075100       0.377000
53681     53681     shanxi         113.3644       38.8381           85       173     2012      04        12        103              0.211917       7.605408       0.000000       0.202902       0.092000       0.061500       0.071300       0.458000
53681     53681     shanxi         113.3644       38.8381           85       173     2012      04        13        104              0.210750      10.441650       0.000000       0.204797       0.082000   -9999.000000       0.077400       0.631000
53681     53681     shanxi         113.3644       38.8381           85       173     2012      04        14        105              0.209583      12.776154       0.000000       0.199343       0.076000   -9999.000000   -9999.000000   -9999.000000
53681     53681     shanxi         113.3644       38.8381           85       173     2012      04        15        106              0.208083      14.645752       0.000000       0.193198       0.069000       0.103300       0.062800       0.614000
53681     53681     shanxi         113.3644       38.8381           85       173     2012      04        16        107              0.205708      14.700043       0.000000       0.188384       0.074000   -9999.000000       0.077300       0.431000
53681     53681     shanxi         113.3644       38.8381           85       173     2012      04        17        108              0.204500      13.435516       0.000000       0.185960       0.083000       0.079100       0.072400       0.779000
53681     53681     shanxi         113.3644       38.8381           85       173     2012      04        18        109              0.203375      15.097046       4.296481       0.184156       0.099000   -9999.000000   -9999.000000       0.626000
53681     53681     shanxi         113.3644       38.8381           85       173     2012      04        19        110              0.203833      14.149902       0.000000       0.221923       0.075000   -9999.000000       0.082400   -9999.000000
53681     53681     shanxi         113.3644       38.8381           85       173     2012      04        20        111              0.203958      14.128723       0.165186       0.222592       0.083000       0.128600       0.080000       0.673000
53681     53681     shanxi         113.3644       38.8381           85       173     2012      04        21        112              0.203083      14.795715       0.000000       0.209841       0.079500   -9999.000000       0.073800       0.327000
53681     53681     shanxi         113.3644       38.8381           85       173     2012      04        22        113              0.202087      15.738617       1.062158       0.202088       0.088000       0.262100       0.081800       0.666000
53681     53681     shanxi         113.3644       38.8381           85       173     2012      04        23        114              0.201000      17.657715       9.832911       0.205448       0.090000   -9999.000000       0.078300       0.420000
53681     53681     shanxi         113.3644       38.8381           85       173     2012      04        24        115              0.248917      19.581177      12.468018       0.217662   -9999.000000   -9999.000000       0.120400   -9999.000000
53681     53681     shanxi         113.3644       38.8381           85       173     2012      04        25        116              0.000000       8.782318       0.000000       0.312132   -9999.000000       0.234200   -9999.000000       0.852000
53681     53681     shanxi         113.3644       38.8381           85       173     2012      04        26        117              0.221333       8.526642       0.000000       0.276160       0.090000   -9999.000000       0.080700       0.395000
53681     53681     shanxi         113.3644       38.8381           85       173     2012      04        27        118              0.214542      15.154144       0.000000       0.258660       0.089500       0.268500   -9999.000000       0.779000
53681     53681     shanxi         113.3644       38.8381           85       173     2012      04        28        119              0.210333      14.485596       0.000000       0.244001       0.086000       0.291800       0.071700       0.389000
53681     53681     shanxi         113.3644       38.8381           85       173     2012      04        29        120              0.207417      15.303802       0.000000       0.235158       0.079000   -9999.000000       0.075400   -9999.000000
53681     53681     shanxi         113.3644       38.8381           85       173     2012      04        30        121              0.204500      17.050720       0.000000       0.225981       0.078000       0.145400       0.080500       0.705000
53681     53681     shanxi         113.3644       38.8381           85       173     2012      05        01        122              0.201000      19.451080       0.126456       0.216509       0.090500   -9999.000000       0.093000       0.463000
53681     53681     shanxi         113.3644       38.8381           85       173     2012      05        02        123              0.199333      16.544189       0.000000       0.216122       0.082000   -9999.000000       0.073100       0.786000
53681     53681     shanxi         113.3644       38.8381           85       173     2012      05        03        124              0.195958      19.608490       0.348029       0.206756       0.090000       0.158400       0.083800       0.515000
53681     53681     shanxi         113.3644       38.8381           85       173     2012      05        04        125              0.193250      19.958496       0.000000       0.199961       0.087000   -9999.000000       0.073100   -9999.000000
53681     53681     shanxi         113.3644       38.8381           85       173     2012      05        05        126              0.189542      21.536591       0.000000       0.191146       0.077000   -9999.000000       0.079500       0.241000
53681     53681     shanxi         113.3644       38.8381           85       173     2012      05        06        127              0.186292      21.242798       0.000000       0.184053       0.075000   -9999.000000       0.078600       0.464000
53681     53681     shanxi         113.3644       38.8381           85       173     2012      05        07        128              0.183000      22.261536       0.039030       0.180354   -9999.000000   -9999.000000       0.096900       0.460000
53681     53681     shanxi         113.3644       38.8381           85       173     2012      05        08        129              0.179875      22.599243       0.323050       0.179676       0.077000       0.216700       0.096800       0.396000
53681     53681     shanxi         113.3644       38.8381           85       173     2012      05        09        130              0.194208      22.932373       6.830776       0.178604       0.139000   -9999.000000       0.133600       0.936000
53681     53681     shanxi         113.3644       38.8381           85       173     2012      05        10        131              0.197000      16.436066       0.281844       0.258749       0.088000   -9999.000000       0.109700       0.427000
53681     53681     shanxi         113.3644       38.8381           85       173     2012      05        11        132              0.225458      21.178162       7.828104       0.234751       0.135000   -9999.000000       0.153400       0.846000
53681     53681     shanxi         113.3644       38.8381           85       173     2012      05        12        133              0.222333      15.236053       0.000000       0.278335       0.111000       0.229200   -9999.000000       0.474000
53681     53681     shanxi         113.3644       38.8381           85       173     2012      05        13        134              0.209083      14.207916       0.000000       0.256820       0.113000       0.157900       0.098900   -9999.000000
53681     53681     shanxi         113.3644       38.8381           85       173     2012      05        14        135              0.200958      14.967529       0.000000       0.240348       0.106000   -9999.000000       0.129200       0.496000
53681     53681     shanxi         113.3644       38.8381           85       173     2012      05        15        136              0.193458      14.813263       0.000000       0.226240       0.098500       0.148900       0.120400       0.288000
53681     53681     shanxi         113.3644       38.8381           85       173     2012      05        16        137              0.186958      16.348267       0.000000       0.214786       0.093000       0.158200       0.113800       0.643000
53681     53681     shanxi         113.3644       38.8381           85       173     2012      05        17        138              0.180833      17.115479       0.000000       0.205056       0.095500   -9999.000000       0.122800       0.390000
53681     53681     shanxi         113.3644       38.8381           85       173     2012      05        18        139              0.173750      20.624542       0.000000       0.194495       0.100500       0.262400       0.127500   -9999.000000
53681     53681     shanxi         113.3644       38.8381           85       173     2012      05        19        140              0.167625      22.801117       3.452807       0.187164       0.097000   -9999.000000       0.128600       0.522000
53681     53681     shanxi         113.3644       38.8381           85       173     2012      05        20        141              0.163500      22.065643       0.061507       0.211227       0.081000   -9999.000000       0.132500       0.366000
53681     53681     shanxi         113.3644       38.8381           85       173     2012      05        21        142              0.162000      19.415314       3.954468       0.217225       0.172000       0.241500       0.181800       0.540000
53681     53681     shanxi         113.3644       38.8381           85       173     2012      05        22        143              0.163250      14.936737       0.000000       0.242548       0.123000   -9999.000000       0.154000       0.448000
53681     53681     shanxi         113.3644       38.8381           85       173     2012      05        23        144              0.162792      17.150726       0.000000       0.234319   -9999.000000   -9999.000000       0.148800   -9999.000000
53681     53681     shanxi         113.3644       38.8381           85       173     2012      05        24        145              0.162042      16.032684       0.000000       0.219753       0.119000   -9999.000000       0.143700       0.537000
53681     53681     shanxi         113.3644       38.8381           85       173     2012      05        25        146              0.000000      18.988098       0.185090       0.205639   -9999.000000   -9999.000000       0.148600       0.325000
53681     53681     shanxi         113.3644       38.8381           85       173     2012      05        26        147              0.157542      17.331360       0.000000       0.200927       0.108000       0.233400       0.145200       0.581000
53681     53681     shanxi         113.3644       38.8381           85       173     2012      05        27        148              0.154583      20.808411       0.000000       0.189157       0.110000   -9999.000000       0.130000       0.407000
53681     53681     shanxi         113.3644       38.8381           85       173     2012      05        28        149              0.152417      21.778534       4.076491       0.180666       0.110000       0.080700       0.140900   -9999.000000
53681     53681     shanxi         113.3644       38.8381           85       173     2012      05        29        150              0.153500      23.454468       1.387816       0.183648       0.106000   -9999.000000   -9999.000000       0.854000
53681     53681     shanxi         113.3644       38.8381           85       173     2012      05        30        151              0.154167      18.103271       3.169335       0.233853       0.118000       0.273700       0.135800   -9999.000000
53681     53681     shanxi         113.3644       38.8381           85       173     2012      05        31        152              0.205042      18.749664      27.564905       0.207176       0.176000   -9999.000000   -9999.000000   -9999.000000
53681     53681     shanxi         113.3644       38.8381           85       173     2012      06        01        153              0.234500      15.201202       0.180522       0.309668       0.164000   -9999.000000       0.202500       0.826000
53681     53681     shanxi         113.3644       38.8381           85       173     2012      06        02        154              0.230333      17.228180       7.216645       0.296410       0.170000       0.225400       0.160600   -9999.000000
53681     53681     shanxi         113.3644       38.8381           85       173     2012      06        03        155              0.252750      18.607605       5.139889       0.286670       0.235000       0.300500       0.214900       0.952000
53681     53681     shanxi         113.3644       38.8381           85       173     2012      06        04        156              0.230333      17.241333       0.000000       0.308723       0.182000   -9999.000000       0.305100       0.596000
53681     53681     shanxi         113.3644       38.8381           85       173     2012      06        05        157              0.217833      19.957733       0.121874       0.281871       0.142500       0.167300       0.244600       0.441000
53681     53681     shanxi         113.3644       38.8381           85       173     2012      06        06        158              0.208917      21.427216       0.436554       0.266817       0.143000   -9999.000000       0.263300       0.477000
53681     53681     shanxi         113.3644       38.8381           85       173     2012      06        07        159              0.212125      19.103485       0.961569       0.263661       0.146000       0.137200       0.243400       0.510000
53681     53681     shanxi         113.3644       38.8381           85       173     2012      06        08        160              0.208500      18.471863       0.000000       0.263560       0.138000       0.185600       0.240900       0.327000
53681     53681     shanxi         113.3644       38.8381           85       173     2012      06        09        161              0.201917      20.488098       1.158748       0.251619       0.115000   -9999.000000   -9999.000000       0.555000
53681     53681     shanxi         113.3644       38.8381           85       173     2012      06        10        162              0.197875      20.086304       0.000000       0.249282       0.122000       0.099800       0.232200       0.352000
53681     53681     shanxi         113.3644       38.8381           85       173     2012      06        11        163              0.000000      18.264038       0.000000       0.235824       0.148000   -9999.000000       0.213900   -9999.000000
53681     53681     shanxi         113.3644       38.8381           85       173     2012      06        12        164              0.189542      19.616028       0.000000       0.222490       0.150000   -9999.000000       0.221000       0.403000
53681     53681     shanxi         113.3644       38.8381           85       173     2012      06        13        165              0.185917      20.638123       0.072744       0.214449       0.142500       0.198100       0.194000       0.301000
53681     53681     shanxi         113.3644       38.8381           85       173     2012      06        14        166              0.182583      20.579315       0.000000       0.208592       0.158000   -9999.000000       0.200200       0.451000
53681     53681     shanxi         113.3644       38.8381           85       173     2012      06        15        167              0.180417      17.850403       0.000000       0.206244       0.169000       0.127700   -9999.000000       0.439000
53681     53681     shanxi         113.3644       38.8381           85       173     2012      06        16        168              0.178292      19.592712       0.000000       0.201669       0.144000   -9999.000000       0.192600   -9999.000000
53681     53681     shanxi         113.3644       38.8381           85       173     2012      06        17        169              0.174833      22.624664       0.000000       0.193354       0.142000   -9999.000000       0.209800       0.474000
53681     53681     shanxi         113.3644       38.8381           85       173     2012      06        18        170              0.171542      24.908142       0.916516       0.185597       0.150000       0.066100       0.194200       0.441000
53681     53681     shanxi         113.3644       38.8381           85       173     2012      06        19        171              0.169917      24.398895       1.383247       0.192298       0.192000   -9999.000000       0.204900       0.575000
53681     53681     shanxi         113.3644       38.8381           85       173     2012      06        20        172              0.168250      22.667389       0.000000       0.200897       0.175000       0.246000       0.202000       0.443000
53681     53681     shanxi         113.3644       38.8381           85       173     2012      06        21        173              0.166958      21.418915       0.318829       0.199314       0.164000   -9999.000000       0.212400   -9999.000000
53681     53681     shanxi         113.3644       38.8381           85       173     2012      06        22        174              0.169208      22.370026       9.597029       0.193143       0.179000   -9999.000000       0.216900       0.576000
53681     53681     shanxi         113.3644       38.8381           85       173     2012      06        23        175              0.191292      23.139984      19.415199       0.245029       0.150000       0.203900       0.241600       0.643000
53681     53681     shanxi         113.3644       38.8381           85       173     2012      06        24        176              0.234917      22.163025       5.841764       0.300753       0.218000   -9999.000000       0.224300       1.000000
53681     53681     shanxi         113.3644       38.8381           85       173     2012      06        25        177              0.222000      19.186066       0.727360       0.314355       0.202000       0.247700       0.272300       0.832000
53681     53681     shanxi         113.3644       38.8381           85       173     2012      06        26        178              0.207417      21.262787       0.361359       0.290769       0.175000       0.157800   -9999.000000   -9999.000000
53681     53681     shanxi         113.3644       38.8381           85       173     2012      06        27        179              0.202167      21.177399       8.100466       0.276688       0.210000   -9999.000000       0.299900       0.706000
53681     53681     shanxi         113.3644       38.8381           85       173     2012      06        28        180              0.289750      18.313110      49.648113       0.287842       0.262000       0.343100       0.290800       1.000000
53681     53681     shanxi         113.3644       38.8381           85       173     2012      06        29        181              0.276625      16.383087       0.305973       0.355910       0.209500   -9999.000000       0.319100       1.000000
53681     53681     shanxi         113.3644       38.8381           85       173     2012      06        30        182              0.241875      19.478333       0.000000       0.339382       0.194000       0.226400       0.261000   -9999.000000
53681     53681     shanxi         113.3644       38.8381           85       173     2012      07        01        183              0.227375      22.198334       0.000000       0.315740       0.187000       0.240500       0.258400   -9999.000000
53681     53681     shanxi         113.3644       38.8381           85       173     2012      07        02        184              0.217250      23.496643       0.000000       0.304087       0.216000   -9999.000000   -9999.000000       0.585000
53681     53681     shanxi         113.3644       38.8381           85       173     2012      07        03        185              0.209708      22.809082       2.056830       0.293455       0.191000   -9999.000000       0.252100       0.678000
53681     53681     shanxi         113.3644       38.8381           85       173     2012      07        04        186              0.203667      22.330383       1.471895       0.293695       0.215500   -9999.000000       0.261200       0.565000
53681     53681     shanxi         113.3644       38.8381           85       173     2012      07        05        187              0.197750      21.893372       0.000000       0.288896       0.202000       0.318500       0.246200       0.478000
53681     53681     shanxi         113.3644       38.8381           85       173     2012      07        06        188              0.190833      23.408295       0.169009       0.281815   -9999.000000       0.076300       0.247200       0.529000
53681     53681     shanxi         113.3644       38.8381           85       173     2012      07        07        189              0.184667      24.633148       0.089653       0.274224   -9999.000000   -9999.000000       0.251000       0.416000
53681     53681     shanxi         113.3644       38.8381           85       173     2012      07        08        190              0.181304      22.025055       1.357119       0.273215       0.237000       0.147500       0.273500       0.823000
53681     53681     shanxi         113.3644       38.8381           85       173     2012      07        09        191              0.189500      22.072571       6.291506       0.276019       0.241000       0.114200       0.252700       0.943000
53681     53681     shanxi         113.3644       38.8381           85       173     2012      07        10        192              0.194167      21.061523       2.065325       0.302185       0.229000   -9999.000000       0.251300   -9999.000000
53681     53681     shanxi         113.3644       38.8381           85       173     2012      07        11        193              0.187417      22.275757       0.000000       0.293091       0.207000       0.226900       0.216600       0.669000
53681     53681     shanxi         113.3644       38.8381           85       173     2012      07        12        194              0.180000      22.888397       0.000000       0.278053       0.197000   -9999.000000       0.223300       0.373000
53681     53681     shanxi         113.3644       38.8381           85       173     2012      07        13        195              0.230125      23.808411      13.549115       0.267403       0.220000       0.328300   -9999.000000       0.600000
53681     53681     shanxi         113.3644       38.8381           85       173     2012      07        14        196              0.262792      20.998627      14.351025       0.309323       0.234500       0.021000       0.238100       0.843000
53681     53681     shanxi         113.3644       38.8381           85       173     2012      07        15        197              0.242833      18.857239       0.106697       0.332896       0.196000   -9999.000000       0.242000   -9999.000000
53681     53681     shanxi         113.3644       38.8381           85       173     2012      07        16        198              0.225792      21.006104       0.000000       0.307335       0.198000       0.322800       0.204800       0.785000
53681     53681     shanxi         113.3644       38.8381           85       173     2012      07        17        199              0.211958      21.696686       0.000000       0.294826       0.206000   -9999.000000       0.206100       0.483000
53681     53681     shanxi         113.3644       38.8381           85       173     2012      07        18        200              0.204042      21.146576       0.000000       0.287211       0.187000   -9999.000000       0.204100       0.630000
53681     53681     shanxi         113.3644       38.8381           85       173     2012      07        19        201              0.195958      21.891602       0.000000       0.281988       0.192000       0.128400       0.212900       0.466000
53681     53681     shanxi         113.3644       38.8381           85       173     2012      07        20        202              0.188478      23.011169       6.464000       0.274667       0.181000   -9999.000000       0.216300   -9999.000000
53681     53681     shanxi         113.3644       38.8381           85       173     2012      07        21        203              0.310435      23.878265      43.007881       0.278897   -9999.000000       0.142500       0.250100       1.000000
53681     53681     shanxi         113.3644       38.8381           85       173     2012      07        22        204              0.263708      19.428528       0.000000       0.365325       0.298000   -9999.000000       0.235900       0.853000
53681     53681     shanxi         113.3644       38.8381           85       173     2012      07        23        205              0.244833      20.648773       0.028347       0.323846       0.274000   -9999.000000       0.136100       0.906000
53681     53681     shanxi         113.3644       38.8381           85       173     2012      07        24        206              0.237167      21.319824       7.124037       0.312124       0.261000       0.125200       0.122000       0.718000
53681     53681     shanxi         113.3644       38.8381           85       173     2012      07        25        207              0.277500      22.117798       1.228598       0.310742       0.310000   -9999.000000       0.138600   -9999.000000
53681     53681     shanxi         113.3644       38.8381           85       173     2012      07        26        208              0.259000      21.038849       1.532302       0.322466       0.304000       0.135500       0.136100       0.949000
53681     53681     shanxi         113.3644       38.8381           85       173     2012      07        27        209              0.251250      22.417786       1.395611       0.312819   -9999.000000   -9999.000000       0.134900       0.671000
53681     53681     shanxi         113.3644       38.8381           85       173     2012      07        28        210              0.246792      21.627075       3.445278       0.309706       0.262000   -9999.000000       0.127100       0.954000
53681     53681     shanxi         113.3644       38.8381           85       173     2012      07        29        211              0.232250      22.458160       0.000000       0.313856       0.259000       0.148200       0.124800       0.673000
53681     53681     shanxi         113.3644       38.8381           85       173     2012      07        30        212              0.323792      24.024475     107.489182       0.299838   -9999.000000   -9999.000000   -9999.000000   -9999.000000
53681     53681     shanxi         113.3644       38.8381           85       173     2012      07        31        213              0.312208      19.158813       6.814171       0.422796       0.337500       0.280000       0.162400       0.991000
53681     53681     shanxi         113.3644       38.8381           85       173     2012      08        01        214              0.289292      18.594910       0.000000       0.352832       0.333000       0.240400       0.172200       0.952000
53681     53681     shanxi         113.3644       38.8381           85       173     2012      08        02        215              0.285042      20.228668       0.618563       0.331753       0.327000       0.592600       0.165800       0.855000
53681     53681     shanxi         113.3644       38.8381           85       173     2012      08        03        216              0.272875      22.329712       0.000000       0.323001       0.283000       0.241800       0.155800       0.883000
53681     53681     shanxi         113.3644       38.8381           85       173     2012      08        04        217              0.260458      23.301300       0.993311       0.314986       0.247000   -9999.000000       0.152200       0.921000
53681     53681     shanxi         113.3644       38.8381           85       173     2012      08        05        218              0.253792      23.230011       0.000000       0.309208       0.251500   -9999.000000       0.162100       0.644000
53681     53681     shanxi         113.3644       38.8381           85       173     2012      08        06        219              0.247458      22.353699       0.000000       0.305251       0.276000       0.150500       0.145200       0.661000
53681     53681     shanxi         113.3644       38.8381           85       173     2012      08        07        220              0.240125      23.508087       0.142274       0.300712       0.269000   -9999.000000   -9999.000000       0.655000
53681     53681     shanxi         113.3644       38.8381           85       173     2012      08        08        221              0.263000      24.738068       3.246837       0.296498       0.245500       0.205200       0.150600   -9999.000000
53681     53681     shanxi         113.3644       38.8381           85       173     2012      08        09        222              0.255542      22.649261       0.000000       0.304071       0.233000   -9999.000000       0.151000       0.713000
53681     53681     shanxi         113.3644       38.8381           85       173     2012      08        10        223              0.238625      22.998596       0.000000       0.294793       0.231500   -9999.000000   -9999.000000       0.527000
53681     53681     shanxi         113.3644       38.8381           85       173     2012      08        11        224              0.288042      22.440094      25.656000       0.287668       0.309500       0.200200       0.168900       0.723000
53681     53681     shanxi         113.3644       38.8381           85       173     2012      08        12        225              0.295375      19.624908       0.594617       0.335773       0.303000   -9999.000000       0.165200       0.952000
53681     53681     shanxi         113.3644       38.8381           85       173     2012      08        13        226              0.271708      20.785187       0.000000       0.325319       0.298000       0.232800       0.185500   -9999.000000
53681     53681     shanxi         113.3644       38.8381           85       173     2012      08        14        227              0.279167      20.546051       5.293373       0.313397       0.300000   -9999.000000       0.187400       1.000000
53681     53681     shanxi         113.3644       38.8381           85       173     2012      08        15        228              0.263167      18.395630       0.000000       0.322520       0.282000   -9999.000000       0.177600       0.681000
53681     53681     shanxi         113.3644       38.8381           85       173     2012      08        16        229              0.250542      20.599030       0.558203       0.307270       0.252500       0.251100   -9999.000000       0.842000
53681     53681     shanxi         113.3644       38.8381           85       173     2012      08        17        230              0.251417      20.963104       3.339099       0.301267       0.284000   -9999.000000       0.175700       0.929000
53681     53681     shanxi         113.3644       38.8381           85       173     2012      08        18        231              0.259208      18.574829       1.511026       0.311341       0.301000       0.142500       0.189900   -9999.000000
53681     53681     shanxi         113.3644       38.8381           85       173     2012      08        19        232              0.247000      18.377411       0.000000       0.311094       0.259000       0.168400       0.164200       0.865000
53681     53681     shanxi         113.3644       38.8381           85       173     2012      08        20        233              0.237167      20.981812       0.000000       0.300399       0.245000       0.149300       0.180900       0.584000
53681     53681     shanxi         113.3644       38.8381           85       173     2012      08        21        234              0.228000      20.630646       0.000000       0.294543       0.289500       0.155000       0.177300       0.755000
53681     53681     shanxi         113.3644       38.8381           85       173     2012      08        22        235              0.219208      17.281067       0.000000       0.287364       0.293500   -9999.000000       0.185200   -9999.000000
53681     53681     shanxi         113.3644       38.8381           85       173     2012      08        23        236              0.212625      17.868652       0.000000       0.283896       0.315000   -9999.000000       0.175500   -9999.000000
53681     53681     shanxi         113.3644       38.8381           85       173     2012      08        24        237              0.205292      18.661652       0.000000       0.281301       0.275000       0.156100       0.182400       0.635000
53681     53681     shanxi         113.3644       38.8381           85       173     2012      08        25        238              0.000000      19.330994       0.000000       0.277756       0.316000   -9999.000000       0.171600       0.535000
53681     53681     shanxi         113.3644       38.8381           85       173     2012      08        26        239              0.194792      20.390045       0.419656       0.275865       0.273000       0.163100       0.177200       0.646000
53681     53681     shanxi         113.3644       38.8381           85       173     2012      08        27        240              0.227250      20.951538       7.963985       0.275297       0.304000   -9999.000000   -9999.000000       0.914000
53681     53681     shanxi         113.3644       38.8381           85       173     2012      08        28        241              0.243042      20.093079       0.146302       0.298035       0.305000       0.392400       0.206500   -9999.000000
53681     53681     shanxi         113.3644       38.8381           85       173     2012      08        29        242              0.230250      20.327545       0.000000       0.292290       0.296000       0.232100       0.214300       0.507000
53681     53681     shanxi         113.3644       38.8381           85       173     2012      08        30        243              0.219417      21.599091       0.000000       0.281736       0.292000       0.315800       0.208700       0.553000
53681     53681     shanxi         113.3644       38.8381           85       173     2012      08        31        244              0.212625      21.791687       0.457957       0.276821       0.302000       0.174500       0.205900       0.537000
53681     53681     shanxi         113.3644       38.8381           85       173     2012      09        01        245              0.296625      20.464325      28.656645       0.278600       0.261000   -9999.000000       0.238900       1.000000
53681     53681     shanxi         113.3644       38.8381           85       173     2012      09        02        246              0.284125      16.812622       0.036703       0.340859       0.289500       0.209100   -9999.000000       0.807000
53681     53681     shanxi         113.3644       38.8381           85       173     2012      09        03        247              0.264042      15.968842       0.000000       0.318989       0.259000       0.146200       0.226800       0.620000
53681     53681     shanxi         113.3644       38.8381           85       173     2012      09        04        248              0.253042      14.821533       0.000000       0.306489       0.226500   -9999.000000       0.235400       0.538000
53681     53681     shanxi         113.3644       38.8381           85       173     2012      09        05        249              0.244708      15.206146       0.974520       0.299188       0.243000       0.133900       0.213600       0.593000
53681     53681     shanxi         113.3644       38.8381           85       173     2012      09        06        250              0.262000      17.467987       1.375522       0.295969       0.250500       0.169000       0.244600   -9999.000000
53681     53681     shanxi         113.3644       38.8381           85       173     2012      09        07        251              0.254667      15.534149       0.382553       0.303329       0.238000       0.390100       0.227900       0.760000
53681     53681     shanxi         113.3644       38.8381           85       173     2012      09        08        252              0.244458      17.442535       0.000000       0.296003       0.229000       0.152100       0.223600       0.535000
53681     53681     shanxi         113.3644       38.8381           85       173     2012      09        09        253              0.235417      17.483978       0.000000       0.291312       0.242000   -9999.000000       0.212500       0.722000
53681     53681     shanxi         113.3644       38.8381           85       173     2012      09        10        254              0.234417      18.452820       1.134998       0.285239       0.227000   -9999.000000       0.184800       0.654000
53681     53681     shanxi         113.3644       38.8381           85       173     2012      09        11        255              0.239292      17.916962       0.089542       0.286306       0.192000       0.033200       0.176500   -9999.000000
53681     53681     shanxi         113.3644       38.8381           85       173     2012      09        12        256              0.232125      16.746490       0.018604       0.284211       0.204500   -9999.000000       0.179500       0.428000
53681     53681     shanxi         113.3644       38.8381           85       173     2012      09        13        257              0.227833      11.387726       0.625168       0.281165       0.201500       0.059900   -9999.000000       0.577000
53681     53681     shanxi         113.3644       38.8381           85       173     2012      09        14        258              0.223833      11.933929       0.000000       0.282253       0.205000   -9999.000000       0.172000       0.601000
53681     53681     shanxi         113.3644       38.8381           85       173     2012      09        15        259              0.219375      13.295441       0.000000       0.279174       0.195000   -9999.000000       0.182900       0.411000
53681     53681     shanxi         113.3644       38.8381           85       173     2012      09        16        260              0.215958      14.149170       0.000000       0.276664       0.204000       0.196000       0.165700   -9999.000000
53681     53681     shanxi         113.3644       38.8381           85       173     2012      09        17        261              0.213125      14.988312       0.000000       0.274346       0.190000   -9999.000000       0.138800       0.565000
53681     53681     shanxi         113.3644       38.8381           85       173     2012      09        18        262              0.211458      14.564819       1.255643       0.273702       0.182000   -9999.000000       0.147900       0.521000
53681     53681     shanxi         113.3644       38.8381           85       173     2012      09        19        263              0.227958      14.604797       2.002626       0.277092       0.201000   -9999.000000       0.156000       0.744000
53681     53681     shanxi         113.3644       38.8381           85       173     2012      09        20        264              0.227625      14.951996       3.361668       0.286203       0.192000   -9999.000000       0.135200       0.454000
53681     53681     shanxi         113.3644       38.8381           85       173     2012      09        21        265              0.300000      15.958832      15.993231       0.286682   -9999.000000       0.069200       0.164000   -9999.000000
53681     53681     shanxi         113.3644       38.8381           85       173     2012      09        22        266              0.279167      12.488068       0.000000       0.332649       0.190000   -9999.000000       0.153700       0.906000
53681     53681     shanxi         113.3644       38.8381           85       173     2012      09        23        267              0.268958      14.909576       0.337971       0.307874       0.180500       0.176000       0.161600       0.606000
53681     53681     shanxi         113.3644       38.8381           85       173     2012      09        24        268              0.264875      15.801208       1.180079       0.300464       0.202000       0.254900       0.192700       0.772000
53681     53681     shanxi         113.3644       38.8381           85       173     2012      09        25        269              0.298042      14.824371      15.754538       0.300399   -9999.000000   -9999.000000       0.197800       0.925000
53681     53681     shanxi         113.3644       38.8381           85       173     2012      09        26        270              0.280833      11.959717       0.000000       0.336188       0.202000       0.162200       0.198400   -9999.000000
53681     53681     shanxi         113.3644       38.8381           85       173     2012      09        27        271              0.269500      13.515778       0.000000       0.313945       0.203000   -9999.000000       0.206200       0.593000
53681     53681     shanxi         113.3644       38.8381           85       173     2012      09        28        272              0.257000      11.327942       0.000000       0.304418       0.195500   -9999.000000       0.185600       0.517000
53681     53681     shanxi         113.3644       38.8381           85       173     2012      09        29        273              0.252792       9.860199       0.000000       0.298966       0.208000   -9999.000000       0.202600       0.493000
53681     53681     shanxi         113.3644       38.8381           85       173     2012      09        30        274              0.248500      10.007355       0.000000       0.295287       0.200000   -9999.000000   -9999.000000       0.368000
53681     53681     shanxi         113.3644       38.8381           85       173     2012      10        01        275              0.245500      11.176666       0.000000       0.293142       0.142500       0.202300       0.131300       0.565000
53681     53681     shanxi         113.3644       38.8381           85       173     2012      10        02        276              0.243042      12.024475       0.000000       0.290211       0.138000   -9999.000000       0.138300       0.409000
53681     53681     shanxi         113.3644       38.8381           85       173     2012      10        03        277              0.239792      12.975494       0.000000       0.287943       0.138000       0.201000       0.142400       0.517000
53681     53681     shanxi         113.3644       38.8381           85       173     2012      10        04        278              0.239625      12.690674       0.532079       0.284841       0.159500       0.209900       0.146900       0.541000
53681     53681     shanxi         113.3644       38.8381           85       173     2012      10        05        279              0.239875      10.217987       0.744140       0.288589       0.181000       0.280500       0.138900   -9999.000000
53681     53681     shanxi         113.3644       38.8381           85       173     2012      10        06        280              0.238625       9.084808       0.665138       0.290654       0.175000       0.202500       0.141800       0.550000
53681     53681     shanxi         113.3644       38.8381           85       173     2012      10        07        281              0.237417      11.210602       0.130858       0.288532       0.143000   -9999.000000       0.133400       0.444000
53681     53681     shanxi         113.3644       38.8381           85       173     2012      10        08        282              0.236667      11.366699       0.964764       0.287839       0.152000   -9999.000000       0.131600       0.733000
53681     53681     shanxi         113.3644       38.8381           85       173     2012      10        09        283              0.234083      12.712189       0.000000       0.288268       0.151500       0.144300       0.124500       0.437000
53681     53681     shanxi         113.3644       38.8381           85       173     2012      10        10        284              0.231458       8.869415       0.000000       0.284482       0.166500   -9999.000000       0.133800   -9999.000000
53681     53681     shanxi         113.3644       38.8381           85       173     2012      10        11        285              0.229583       8.906952       0.000000       0.282433       0.132000       0.046100       0.124500       0.585000
53681     53681     shanxi         113.3644       38.8381           85       173     2012      10        12        286              0.228000      10.345551       0.000000       0.281028       0.121000       0.141000       0.121000       0.425000
53681     53681     shanxi         113.3644       38.8381           85       173     2012      10        13        287              0.226042      11.117157       0.000000       0.279111       0.115000       0.213300       0.124500       0.646000
53681     53681     shanxi         113.3644       38.8381           85       173     2012      10        14        288              0.224875      10.878296       0.000000       0.277725       0.120000       0.127200       0.125600       0.420000
53681     53681     shanxi         113.3644       38.8381           85       173     2012      10        15        289              0.254000      10.412384       5.143721       0.278022       0.134500   -9999.000000       0.130100   -9999.000000
53681     53681     shanxi         113.3644       38.8381           85       173     2012      10        16        290              0.280958       6.499786       0.701999       0.297772       0.177000   -9999.000000       0.165400       0.852000
53681     53681     shanxi         113.3644       38.8381           85       173     2012      10        17        291              0.266125       5.131653       0.456925       0.286887       0.151000       0.241900   -9999.000000       0.487000
53681     53681     shanxi         113.3644       38.8381           85       173     2012      10        18        292              0.258458       5.181274       0.000000       0.280395   -9999.000000       0.403700       0.134100       0.768000
53681     53681     shanxi         113.3644       38.8381           85       173     2012      10        19        293              0.253708       5.568756       0.000000       0.282982       0.117000       0.390400       0.140000       0.459000
53681     53681     shanxi         113.3644       38.8381           85       173     2012      10        20        294              0.249833       6.971527       0.000000       0.283884       0.131000   -9999.000000       0.138500   -9999.000000
53681     53681     shanxi         113.3644       38.8381           85       173     2012      10        21        295              0.263958       8.934753       3.172024       0.284582   -9999.000000   -9999.000000       0.147200       0.754000
53681     53681     shanxi         113.3644       38.8381           85       173     2012      10        22        296              0.260250       4.446411       0.058358       0.297910   -9999.000000       0.368200       0.124500       0.516000
53681     53681     shanxi         113.3644       38.8381           85       173     2012      10        23        297              0.254792       5.211578       0.000000       0.282548   -9999.000000   -9999.000000       0.120900       0.795000
53681     53681     shanxi         113.3644       38.8381           85       173     2012      10        24        298              0.251042       5.833740       0.000000       0.285442   -9999.000000       0.190700       0.107700       0.622000
53681     53681     shanxi         113.3644       38.8381           85       173     2012      10        25        299              0.000000       7.378113       0.184480       0.285462       0.113000   -9999.000000       0.108600   -9999.000000
53681     53681     shanxi         113.3644       38.8381           85       173     2012      10        26        300              0.246000       7.981842       0.027240       0.284506       0.119000       0.348400       0.113200       0.395000
53681     53681     shanxi         113.3644       38.8381           85       173     2012      10        27        301              0.244042       6.560455       0.000000       0.284790       0.124000       0.080300       0.118200       0.433000
53681     53681     shanxi         113.3644       38.8381           85       173     2012      10        28        302              0.000000       7.119019       0.000000       0.282037       0.104000   -9999.000000   -9999.000000       0.484000
53681     53681     shanxi         113.3644       38.8381           85       173     2012      10        29        303              0.238875       7.206024       0.000000       0.281401   -9999.000000       0.190000       0.087100       0.353000
53681     53681     shanxi         113.3644       38.8381           85       173     2012      10        30        304              0.236167       4.480377       0.000000       0.252710   -9999.000000   -9999.000000       0.098200       0.348000
53681     53681     shanxi         113.3644       38.8381           85       173     2012      10        31        305              0.233833       2.999451       0.000000       0.255078       0.109000   -9999.000000       0.089400       0.262000
53681     53681     shanxi         113.3644       38.8381           85       173     2012      11        01        306              0.232042       3.958923       0.000000       0.260290       0.110000       0.171800       0.091700       0.427000
53681     53681     shanxi         113.3644       38.8381           85       173     2012      11        02        307              0.231792       4.153564       0.348768       0.263569       0.109000   -9999.000000       0.099500       0.380000
53681     53681     shanxi         113.3644       38.8381           85       173     2012      11        03        308              0.245917       5.369019       0.537637       0.275093   -9999.000000   -9999.000000   -9999.000000   -9999.000000
53681     53681     shanxi         113.3644       38.8381           85       173     2012      11        04        309              0.232042      -0.222168       0.000000       0.215222   -9999.000000   -9999.000000       0.080500       0.357000
53681     53681     shanxi         113.3644       38.8381           85       173     2012      11        05        310              0.235708      -2.425110       0.000000       0.156868       0.129000   -9999.000000       0.071900       0.231000
53681     53681     shanxi         113.3644       38.8381           85       173     2012      11        06        311              0.239792       0.054626       0.000000       0.200495       0.127000       0.132900       0.088000       0.650000
53681     53681     shanxi         113.3644       38.8381           85       173     2012      11        07        312              0.239417       1.408295       0.000000       0.222736       0.131000   -9999.000000       0.087800       0.380000
53681     53681     shanxi         113.3644       38.8381           85       173     2012      11        08        313              0.237000       1.012299       0.000000       0.222561       0.111000   -9999.000000   -9999.000000   -9999.000000
53681     53681     shanxi         113.3644       38.8381           85       173     2012      11        09        314              0.237833       1.697784       1.267706       0.226057   -9999.000000       0.255200       0.083200       0.536000
53681     53681     shanxi         113.3644       38.8381           85       173     2012      11        10        315              0.237833       1.226257       0.593742       0.231624   -9999.000000       0.226600       0.064500       0.316000
53681     53681     shanxi         113.3644       38.8381           85       173     2012      11        11        316              0.221583      -1.604126       0.192201       0.182751   -9999.000000       0.030900       0.068100       0.426000
53681     53681     shanxi         113.3644       38.8381           85       173     2012      11        12        317              0.217208      -2.485779       0.199043       0.163706       0.112000   -9999.000000       0.062700       0.326000
53681     53681     shanxi         113.3644       38.8381           85       173     2012      11        13        318              0.000000      -1.443817       0.000000       0.181268   -9999.000000   -9999.000000       0.067800   -9999.000000
53681     53681     shanxi         113.3644       38.8381           85       173     2012      11        14        319              0.209696      -2.422058       0.000000       0.167961   -9999.000000       0.037300   -9999.000000       0.543000
53681     53681     shanxi         113.3644       38.8381           85       173     2012      11        15        320              0.205708      -0.824432       0.554170       0.190830   -9999.000000   -9999.000000       0.059600       0.169000
53681     53681     shanxi         113.3644       38.8381           85       173     2012      11        16        321              0.205875      -1.147247       0.000000       0.180362   -9999.000000   -9999.000000       0.057100       0.423000
53681     53681     shanxi         113.3644       38.8381           85       173     2012      11        17        322              0.000000      -1.949646       0.000000       0.175344       0.117000   -9999.000000       0.072100       0.361000
53681     53681     shanxi         113.3644       38.8381           85       173     2012      11        18        323              0.198458      -0.904724       0.000000       0.188266       0.118000   -9999.000000       0.071800   -9999.000000
53681     53681     shanxi         113.3644       38.8381           85       173     2012      11        19        324              0.202917      -0.527679       0.244889       0.195143   -9999.000000       0.081100       0.067800       0.456000
53681     53681     shanxi         113.3644       38.8381           85       173     2012      11        20        325              0.202125      -0.932404       0.000000       0.190098   -9999.000000   -9999.000000       0.063500       0.260000
53681     53681     shanxi         113.3644       38.8381           85       173     2012      11        21        326              0.209542      -0.698853       0.000000       0.189329       0.111000   -9999.000000       0.057400       0.387000
53681     53681     shanxi         113.3644       38.8381           85       173     2012      11        22        327              0.213542       0.058838       0.000000       0.201111   -9999.000000   -9999.000000       0.060000       0.268000
53681     53681     shanxi         113.3644       38.8381           85       173     2012      11        23        328              0.181167      -3.049438       0.000000       0.167358   -9999.000000       0.240800       0.063300   -9999.000000
53681     53681     shanxi         113.3644       38.8381           85       173     2012      11        24        329              0.173583      -4.295685       0.000000       0.155368   -9999.000000       0.030100       0.066900       0.067000
53681     53681     shanxi         113.3644       38.8381           85       173     2012      11        25        330              0.170208      -3.009491       0.000000       0.161417   -9999.000000   -9999.000000       0.059800       0.096000
53681     53681     shanxi         113.3644       38.8381           85       173     2012      11        26        331              0.167125      -3.877106       0.000000       0.154226   -9999.000000   -9999.000000   -9999.000000       0.073000
53681     53681     shanxi         113.3644       38.8381           85       173     2012      11        27        332              0.168583      -4.240662       0.419492       0.153791       0.094000       0.073400       0.054600       0.162000
53681     53681     shanxi         113.3644       38.8381           85       173     2012      11        28        333              0.164417      -2.669006       0.000000       0.169947   -9999.000000   -9999.000000       0.055600       0.177000
53681     53681     shanxi         113.3644       38.8381           85       173     2012      11        29        334              0.162167      -5.856506       0.000000       0.145789   -9999.000000       0.140300       0.056700       0.002000
53681     53681     shanxi         113.3644       38.8381           85       173     2012      11        30        335              0.162250      -5.689575       0.000000       0.144573   -9999.000000   -9999.000000       0.057800       0.070000
53681     53681     shanxi         113.3644       38.8381           85       173     2012      12        01        336              0.159542      -4.056915       0.136512       0.154613   -9999.000000   -9999.000000   -9999.000000       0.036000
53681     53681     shanxi         113.3644       38.8381           85       173     2012      12        02        337              0.160125      -7.321167       0.000000       0.136353   -9999.000000   -9999.000000       0.052300   -9999.000000
53681     53681     shanxi         113.3644       38.8381           85       173     2012      12        03        338              0.159000      -6.722809       0.000000       0.135867   -9999.000000   -9999.000000       0.056900       0.050000
53681     53681     shanxi         113.3644       38.8381           85       173     2012      12        04        339              0.161083      -7.972717       0.033413       0.135903   -9999.000000       0.124400       0.056900       0.101000
53681     53681     shanxi         113.3644       38.8381           85       173     2012      12        05        340              0.158167      -5.643494       0.132170       0.140201   -9999.000000   -9999.000000       0.051200       0.076000
53681     53681     shanxi         113.3644       38.8381           85       173     2012      12        06        341              0.157750      -9.824371       0.155593       0.131358   -9999.000000       0.275800       0.058000       0.027000
53681     53681     shanxi         113.3644       38.8381           85       173     2012      12        07        342              0.158458      -8.422394       0.289291       0.130479   -9999.000000   -9999.000000       0.052200   -9999.000000
53681     53681     shanxi         113.3644       38.8381           85       173     2012      12        08        343              0.156833      -8.785858       1.156254       0.131796   -9999.000000   -9999.000000       0.052100       0.076000
53681     53681     shanxi         113.3644       38.8381           85       173     2012      12        09        344              0.157792     -10.674805       0.000000       0.128358   -9999.000000   -9999.000000       0.053900       0.009000
53681     53681     shanxi         113.3644       38.8381           85       173     2012      12        10        345              0.158000      -8.358002       0.000000       0.129109   -9999.000000   -9999.000000       0.048900       0.176000
53681     53681     shanxi         113.3644       38.8381           85       173     2012      12        11        346              0.157208      -7.982147       0.037618       0.132821   -9999.000000   -9999.000000       0.055200       0.035000
53681     53681     shanxi         113.3644       38.8381           85       173     2012      12        12        347              0.156833      -7.931488       0.000000       0.131298   -9999.000000   -9999.000000   -9999.000000   -9999.000000
53681     53681     shanxi         113.3644       38.8381           85       173     2012      12        13        348              0.157583      -8.273926       0.210161       0.129475   -9999.000000   -9999.000000       0.050700       0.044000
53681     53681     shanxi         113.3644       38.8381           85       173     2012      12        14        349              0.160792      -7.559296       0.000000       0.130092   -9999.000000   -9999.000000       0.048200       0.012000
53681     53681     shanxi         113.3644       38.8381           85       173     2012      12        15        350              0.000000      -7.061157       0.000000       0.133020   -9999.000000   -9999.000000       0.051000       0.115000
53681     53681     shanxi         113.3644       38.8381           85       173     2012      12        16        351              0.162667      -6.226685       0.000000       0.134224   -9999.000000   -9999.000000       0.050500       0.089000
53681     53681     shanxi         113.3644       38.8381           85       173     2012      12        17        352              0.158875      -5.394592       0.000000       0.137302   -9999.000000       0.167500       0.048700   -9999.000000
53681     53681     shanxi         113.3644       38.8381           85       173     2012      12        18        353              0.157000      -7.301025       0.000000       0.133914   -9999.000000   -9999.000000   -9999.000000       0.054000
53681     53681     shanxi         113.3644       38.8381           85       173     2012      12        19        354              0.156833      -8.390900       0.000000       0.128765   -9999.000000   -9999.000000       0.046700   -9999.000000
53681     53681     shanxi         113.3644       38.8381           85       173     2012      12        20        355              0.000000      -8.008026       0.137727       0.129265   -9999.000000   -9999.000000       0.045800       0.046000
53681     53681     shanxi         113.3644       38.8381           85       173     2012      12        21        356              0.158375      -7.631714       0.000000       0.129707   -9999.000000       0.211400       0.044000       0.045000
53681     53681     shanxi         113.3644       38.8381           85       173     2012      12        22        357              0.156375      -8.398926       0.000000       0.129823   -9999.000000   -9999.000000       0.045100   -9999.000000
53681     53681     shanxi         113.3644       38.8381           85       173     2012      12        23        358              0.155167     -13.180115       0.000000       0.126115   -9999.000000   -9999.000000   -9999.000000       0.051000
53681     53681     shanxi         113.3644       38.8381           85       173     2012      12        24        359              0.154778     -16.111115       0.000000       0.122606   -9999.000000   -9999.000000       0.047100       0.061000
53681     53681     shanxi         113.3644       38.8381           85       173     2012      12        25        360              0.155333     -12.844421       0.000000       0.122622   -9999.000000   -9999.000000       0.045400       0.002000
53681     53681     shanxi         113.3644       38.8381           85       173     2012      12        26        361              0.000000     -11.357422       0.000000       0.123182   -9999.000000   -9999.000000       0.043100       0.010000
53681     53681     shanxi         113.3644       38.8381           85       173     2012      12        27        362              0.155273     -11.360352       0.000000       0.123026   -9999.000000   -9999.000000       0.047700       0.044000
53681     53681     shanxi         113.3644       38.8381           85       173     2012      12        28        363              0.000000     -10.210114       0.175620       0.123731   -9999.000000   -9999.000000       0.047300       0.040000
53681     53681     shanxi         113.3644       38.8381           85       173     2012      12        29        364              0.000000     -10.518646       0.000000       0.124425   -9999.000000   -9999.000000   -9999.000000       0.012000
53681     53681     shanxi         113.3644       38.8381           85       173     2012      12        30        365              0.000000     -12.671875       0.000000       0.123991   -9999.000000   -9999.000000       0.043200       0.041000
53681     53681     shanxi         113.3644       38.8381           85       173     2012      12        31        366              0.156000     -11.017853       0.000000       0.123783   -9999.000000   -9999.000000       0.043800   -9999.000000
