# Supplementary material for: Research on Fusing Multisatellite Soil Moisture Data Based on Bayesian Model Averaging
Source: Hindawi journal article supplement (doi:10.1155/2018/9310838), 2018-06-25
Supplement: f1 [file 9310838.f1.zip › 2012_sm00-10cm_daily_ZDB_ZHY_53725_366days_allin.txt]

53725     53725     shaanxi        107.9667       37.9667           88       152     2012      01        01        001              0.000000   -9999.000000       0.000000   -9999.000000   -9999.000000       0.061200       0.014800   -9999.000000
53725     53725     shaanxi        107.9667       37.9667           88       152     2012      01        02        002              0.073958      -9.398743       0.000000       0.067033   -9999.000000   -9999.000000   -9999.000000       0.216000
53725     53725     shaanxi        107.9667       37.9667           88       152     2012      01        03        003              0.000000     -12.021423       0.000000       0.066446   -9999.000000   -9999.000000       0.010000   -9999.000000
53725     53725     shaanxi        107.9667       37.9667           88       152     2012      01        04        004              0.069478     -14.515625       0.000000       0.064497   -9999.000000   -9999.000000       0.011700       0.319000
53725     53725     shaanxi        107.9667       37.9667           88       152     2012      01        05        005              0.070583     -12.785767       0.000000       0.064290   -9999.000000   -9999.000000       0.016400       0.303000
53725     53725     shaanxi        107.9667       37.9667           88       152     2012      01        06        006              0.073375     -11.845032       0.000000       0.064621   -9999.000000   -9999.000000       0.014200       0.327000
53725     53725     shaanxi        107.9667       37.9667           88       152     2012      01        07        007              0.073167      -9.665619       0.000000       0.065219   -9999.000000   -9999.000000       0.014000       0.207000
53725     53725     shaanxi        107.9667       37.9667           88       152     2012      01        08        008              0.000000      -9.840179       0.000000       0.065661   -9999.000000   -9999.000000       0.010000   -9999.000000
53725     53725     shaanxi        107.9667       37.9667           88       152     2012      01        09        009              0.072208     -10.153870       0.000000       0.065032   -9999.000000   -9999.000000   -9999.000000       0.281000
53725     53725     shaanxi        107.9667       37.9667           88       152     2012      01        10        010              0.070583     -10.358887       0.000000       0.065043   -9999.000000   -9999.000000       0.012600       0.301000
53725     53725     shaanxi        107.9667       37.9667           88       152     2012      01        11        011              0.070667     -10.934265       0.000000       0.064868   -9999.000000   -9999.000000       0.012600       0.205000
53725     53725     shaanxi        107.9667       37.9667           88       152     2012      01        12        012              0.071375     -10.216797       0.000000       0.064851   -9999.000000   -9999.000000       0.012200       0.174000
53725     53725     shaanxi        107.9667       37.9667           88       152     2012      01        13        013              0.071208     -10.392059       0.000000       0.065067   -9999.000000   -9999.000000   -9999.000000       0.209000
53725     53725     shaanxi        107.9667       37.9667           88       152     2012      01        14        014              0.070583      -9.789337       0.000000       0.065129   -9999.000000   -9999.000000       0.010000       0.291000
53725     53725     shaanxi        107.9667       37.9667           88       152     2012      01        15        015              0.073417      -9.446838       0.000000       0.065270   -9999.000000   -9999.000000       0.010300   -9999.000000
53725     53725     shaanxi        107.9667       37.9667           88       152     2012      01        16        016              0.076375      -8.648163       0.000000       0.065548   -9999.000000   -9999.000000       0.010700       0.241000
53725     53725     shaanxi        107.9667       37.9667           88       152     2012      01        17        017              0.000000      -7.756744       0.000000       0.067816   -9999.000000   -9999.000000       0.013100   -9999.000000
53725     53725     shaanxi        107.9667       37.9667           88       152     2012      01        18        018              0.077750      -7.253296       0.000000       0.067989   -9999.000000   -9999.000000       0.013900       0.285000
53725     53725     shaanxi        107.9667       37.9667           88       152     2012      01        19        019              0.076875      -5.851105       0.000000       0.072870   -9999.000000   -9999.000000   -9999.000000       0.284000
53725     53725     shaanxi        107.9667       37.9667           88       152     2012      01        20        020              0.075667      -6.375092       0.000000       0.070011   -9999.000000   -9999.000000       0.010000       0.223000
53725     53725     shaanxi        107.9667       37.9667           88       152     2012      01        21        021              0.073500      -9.632385       0.000000       0.067775   -9999.000000   -9999.000000       0.010000       0.186000
53725     53725     shaanxi        107.9667       37.9667           88       152     2012      01        22        022              0.071500     -13.399353       0.000000       0.065714   -9999.000000   -9999.000000       0.010000   -9999.000000
53725     53725     shaanxi        107.9667       37.9667           88       152     2012      01        23        023              0.069208     -14.543610       0.000000       0.064920   -9999.000000   -9999.000000       0.010000       0.246000
53725     53725     shaanxi        107.9667       37.9667           88       152     2012      01        24        024              0.068167     -14.818237       0.000000       0.064111   -9999.000000   -9999.000000   -9999.000000       0.255000
53725     53725     shaanxi        107.9667       37.9667           88       152     2012      01        25        025              0.068667     -14.465057       0.000000       0.064047   -9999.000000   -9999.000000       0.010000       0.327000
53725     53725     shaanxi        107.9667       37.9667           88       152     2012      01        26        026              0.068958     -12.006378       0.000000       0.064491   -9999.000000   -9999.000000       0.010000       0.191000
53725     53725     shaanxi        107.9667       37.9667           88       152     2012      01        27        027              0.069792     -11.007874       0.000000       0.064902   -9999.000000   -9999.000000       0.010000   -9999.000000
53725     53725     shaanxi        107.9667       37.9667           88       152     2012      01        28        028              0.071375      -9.220184       0.000000       0.064951   -9999.000000   -9999.000000       0.010200       0.306000
53725     53725     shaanxi        107.9667       37.9667           88       152     2012      01        29        029              0.073292      -9.451630       0.000000       0.065120   -9999.000000   -9999.000000       0.010200       0.285000
53725     53725     shaanxi        107.9667       37.9667           88       152     2012      01        30        030              0.080083      -8.607147       0.000000       0.065395   -9999.000000   -9999.000000   -9999.000000       0.345000
53725     53725     shaanxi        107.9667       37.9667           88       152     2012      01        31        031              0.084458      -6.263062       0.000000       0.072121   -9999.000000   -9999.000000       0.010000       0.245000
53725     53725     shaanxi        107.9667       37.9667           88       152     2012      02        01        032              0.074292      -6.054871       0.000000       0.086315   -9999.000000   -9999.000000       0.011400   -9999.000000
53725     53725     shaanxi        107.9667       37.9667           88       152     2012      02        02        033              0.073083     -10.641144       0.000000       0.067414   -9999.000000   -9999.000000       0.010600       0.323000
53725     53725     shaanxi        107.9667       37.9667           88       152     2012      02        03        034              0.076917      -9.637543       0.000000       0.066021   -9999.000000   -9999.000000       0.017700       0.304000
53725     53725     shaanxi        107.9667       37.9667           88       152     2012      02        04        035              0.085708      -7.361176       0.000000       0.068531   -9999.000000       0.136500       0.020800       0.360000
53725     53725     shaanxi        107.9667       37.9667           88       152     2012      02        05        036              0.084042      -4.845581       0.000000       0.085259   -9999.000000   -9999.000000   -9999.000000       0.221000
53725     53725     shaanxi        107.9667       37.9667           88       152     2012      02        06        037              0.072708      -5.095459       0.000000       0.087342   -9999.000000   -9999.000000       0.011700   -9999.000000
53725     53725     shaanxi        107.9667       37.9667           88       152     2012      02        07        038              0.069458     -12.135651       0.000000       0.067344   -9999.000000   -9999.000000       0.015700       0.257000
53725     53725     shaanxi        107.9667       37.9667           88       152     2012      02        08        039              0.067625     -11.908051       0.000000       0.064692   -9999.000000   -9999.000000       0.015700       0.216000
53725     53725     shaanxi        107.9667       37.9667           88       152     2012      02        09        040              0.068625     -11.772736       0.000000       0.064938   -9999.000000   -9999.000000       0.018700       0.160000
53725     53725     shaanxi        107.9667       37.9667           88       152     2012      02        10        041              0.073083     -10.433899       0.000000       0.065163   -9999.000000   -9999.000000       0.020300       0.151000
53725     53725     shaanxi        107.9667       37.9667           88       152     2012      02        11        042              0.078917      -8.281128       0.000000       0.065638   -9999.000000   -9999.000000       0.020700   -9999.000000
53725     53725     shaanxi        107.9667       37.9667           88       152     2012      02        12        043              0.082667      -5.141174       0.000000       0.081572   -9999.000000   -9999.000000   -9999.000000       0.294000
53725     53725     shaanxi        107.9667       37.9667           88       152     2012      02        13        044              0.083750      -3.505585       0.000000       0.094117   -9999.000000   -9999.000000   -9999.000000   -9999.000000
53725     53725     shaanxi        107.9667       37.9667           88       152     2012      02        14        045              0.084250      -2.370056       0.000000       0.113639   -9999.000000       0.136200   -9999.000000       0.222000
53725     53725     shaanxi        107.9667       37.9667           88       152     2012      02        15        046              0.084333      -3.056244       0.000000       0.105146   -9999.000000   -9999.000000       0.036900   -9999.000000
53725     53725     shaanxi        107.9667       37.9667           88       152     2012      02        16        047              0.078458      -4.987640       0.000000       0.092936   -9999.000000   -9999.000000   -9999.000000       0.283000
53725     53725     shaanxi        107.9667       37.9667           88       152     2012      02        17        048              0.075375      -6.617645       0.000000       0.080632   -9999.000000   -9999.000000       0.035200       0.245000
53725     53725     shaanxi        107.9667       37.9667           88       152     2012      02        18        049              0.077542      -7.470184       1.000777       0.073863   -9999.000000   -9999.000000       0.038000       0.290000
53725     53725     shaanxi        107.9667       37.9667           88       152     2012      02        19        050              0.085750      -5.837677       0.000000       0.082787       0.093000       0.250100       0.036400       0.175000
53725     53725     shaanxi        107.9667       37.9667           88       152     2012      02        20        051              0.095708      -2.385651       0.000000       0.114138   -9999.000000   -9999.000000       0.067000   -9999.000000
53725     53725     shaanxi        107.9667       37.9667           88       152     2012      02        21        052              0.121875      -0.028381       1.067138       0.135152   -9999.000000   -9999.000000   -9999.000000       0.529000
53725     53725     shaanxi        107.9667       37.9667           88       152     2012      02        22        053              0.140250       1.838593       0.000000       0.158682       0.104000   -9999.000000   -9999.000000       0.309000
53725     53725     shaanxi        107.9667       37.9667           88       152     2012      02        23        054              0.123500       1.124084       0.000000       0.149459       0.100000   -9999.000000       0.056000       0.462000
53725     53725     shaanxi        107.9667       37.9667           88       152     2012      02        24        055              0.090792       1.117371       0.000000       0.153184   -9999.000000   -9999.000000       0.056100       0.104000
53725     53725     shaanxi        107.9667       37.9667           88       152     2012      02        25        056              0.078833      -2.313171       0.000000       0.108879   -9999.000000   -9999.000000       0.053500   -9999.000000
53725     53725     shaanxi        107.9667       37.9667           88       152     2012      02        26        057              0.089750      -5.553772       0.000000       0.076582   -9999.000000   -9999.000000       0.056400       0.175000
53725     53725     shaanxi        107.9667       37.9667           88       152     2012      02        27        058              0.111625      -2.075043       0.000000       0.116034       0.095000   -9999.000000   -9999.000000       0.270000
53725     53725     shaanxi        107.9667       37.9667           88       152     2012      02        28        059              0.130542       0.638702       0.116647       0.141431       0.089000   -9999.000000   -9999.000000       0.370000
53725     53725     shaanxi        107.9667       37.9667           88       152     2012      02        29        060              0.000000   -9999.000000       0.000000   -9999.000000       0.088000   -9999.000000   -9999.000000   -9999.000000
53725     53725     shaanxi        107.9667       37.9667           88       152     2012      03        01        061              0.149792       1.617889       0.000000       0.154437       0.097000       0.036500       0.056600   -9999.000000
53725     53725     shaanxi        107.9667       37.9667           88       152     2012      03        02        062              0.148917       1.868073       0.000000       0.158582       0.087000   -9999.000000       0.062900       0.356000
53725     53725     shaanxi        107.9667       37.9667           88       152     2012      03        03        063              0.145792       1.027557       0.000000       0.152874   -9999.000000   -9999.000000       0.085400       0.384000
53725     53725     shaanxi        107.9667       37.9667           88       152     2012      03        04        064              0.146125       0.649628       0.000000       0.150419   -9999.000000   -9999.000000   -9999.000000       0.574000
53725     53725     shaanxi        107.9667       37.9667           88       152     2012      03        05        065              0.139875       0.769135       0.000000       0.156615       0.114000   -9999.000000       0.056400       0.157000
53725     53725     shaanxi        107.9667       37.9667           88       152     2012      03        06        066              0.123333      -0.348877       0.063593       0.135393       0.106000   -9999.000000       0.058900   -9999.000000
53725     53725     shaanxi        107.9667       37.9667           88       152     2012      03        07        067              0.000000       0.446289       0.000000       0.141333   -9999.000000   -9999.000000       0.065000       0.283000
53725     53725     shaanxi        107.9667       37.9667           88       152     2012      03        08        068              0.137750       0.953186       0.000000       0.147223   -9999.000000   -9999.000000       0.064400       0.178000
53725     53725     shaanxi        107.9667       37.9667           88       152     2012      03        09        069              0.138792       0.538330       0.000000       0.144455       0.090000   -9999.000000       0.061500       0.101000
53725     53725     shaanxi        107.9667       37.9667           88       152     2012      03        10        070              0.136125       1.272980       0.000000       0.151712       0.083000   -9999.000000   -9999.000000       0.100000
53725     53725     shaanxi        107.9667       37.9667           88       152     2012      03        11        071              0.143375       0.617523       0.000000       0.144186       0.086000   -9999.000000       0.049700   -9999.000000
53725     53725     shaanxi        107.9667       37.9667           88       152     2012      03        12        072              0.148125       1.055206       1.783152       0.146499   -9999.000000       0.090700       0.056700       0.226000
53725     53725     shaanxi        107.9667       37.9667           88       152     2012      03        13        073              0.146125       1.928772       0.128447       0.153243   -9999.000000   -9999.000000       0.058000   -9999.000000
53725     53725     shaanxi        107.9667       37.9667           88       152     2012      03        14        074              0.154792       3.149628       0.000000       0.163082       0.083000   -9999.000000   -9999.000000       0.286000
53725     53725     shaanxi        107.9667       37.9667           88       152     2012      03        15        075              0.159542       4.836670       0.000000       0.186555       0.080000   -9999.000000       0.065400   -9999.000000
53725     53725     shaanxi        107.9667       37.9667           88       152     2012      03        16        076              0.159333       4.199951       0.000000       0.186238       0.087000   -9999.000000       0.060900       0.229000
53725     53725     shaanxi        107.9667       37.9667           88       152     2012      03        17        077              0.157917       5.572723       0.397081       0.191108   -9999.000000   -9999.000000       0.058800       0.268000
53725     53725     shaanxi        107.9667       37.9667           88       152     2012      03        18        078              0.155083       5.836975       0.000000       0.179635   -9999.000000   -9999.000000       0.063400       0.214000
53725     53725     shaanxi        107.9667       37.9667           88       152     2012      03        19        079              0.154667       1.795563       0.179050       0.162162       0.088000       0.052200       0.068700       0.240000
53725     53725     shaanxi        107.9667       37.9667           88       152     2012      03        20        080              0.154167       4.449860       0.000000       0.175800       0.085000   -9999.000000       0.068900   -9999.000000
53725     53725     shaanxi        107.9667       37.9667           88       152     2012      03        21        081              0.153417       4.561615       0.000000       0.191676       0.083000       0.263100   -9999.000000       0.263000
53725     53725     shaanxi        107.9667       37.9667           88       152     2012      03        22        082              0.154292       3.144379       1.862752       0.189224       0.116000       0.046300       0.064000       0.340000
53725     53725     shaanxi        107.9667       37.9667           88       152     2012      03        23        083              0.153042       3.004425       0.648263       0.177707   -9999.000000   -9999.000000       0.066600       0.250000
53725     53725     shaanxi        107.9667       37.9667           88       152     2012      03        24        084              0.152542       3.035767       0.571105       0.158164       0.086000   -9999.000000       0.063700       0.094000
53725     53725     shaanxi        107.9667       37.9667           88       152     2012      03        25        085              0.000000       4.817780       1.036090       0.163537       0.087000   -9999.000000       0.065000   -9999.000000
53725     53725     shaanxi        107.9667       37.9667           88       152     2012      03        26        086              0.151625       5.778717       0.000000       0.171037       0.077000   -9999.000000       0.068000       0.239000
53725     53725     shaanxi        107.9667       37.9667           88       152     2012      03        27        087              0.149833       6.854401       0.000000       0.181083       0.084000       0.116400   -9999.000000       0.288000
53725     53725     shaanxi        107.9667       37.9667           88       152     2012      03        28        088              0.147167       8.511017       3.667891       0.191425   -9999.000000   -9999.000000       0.105800       0.213000
53725     53725     shaanxi        107.9667       37.9667           88       152     2012      03        29        089              0.148000       5.725098       0.000000       0.220962   -9999.000000   -9999.000000       0.079700       0.328000
53725     53725     shaanxi        107.9667       37.9667           88       152     2012      03        30        090              0.146125       8.262665       0.625430       0.203870       0.084000   -9999.000000       0.077700   -9999.000000
53725     53725     shaanxi        107.9667       37.9667           88       152     2012      03        31        091              0.144125       5.155334       0.241169       0.186058       0.081000   -9999.000000       0.074000       0.264000
53725     53725     shaanxi        107.9667       37.9667           88       152     2012      04        01        092              0.140125       8.202698       0.105403       0.199568       0.082000       0.074400   -9999.000000       0.277000
53725     53725     shaanxi        107.9667       37.9667           88       152     2012      04        02        093              0.136625       8.208801       0.293338       0.201357   -9999.000000   -9999.000000       0.074900       0.327000
53725     53725     shaanxi        107.9667       37.9667           88       152     2012      04        03        094              0.135250       6.145935       0.000000       0.181279   -9999.000000   -9999.000000       0.074100       0.127000
53725     53725     shaanxi        107.9667       37.9667           88       152     2012      04        04        095              0.131042       7.262695       0.000000       0.186983       0.085000       0.037800       0.077400   -9999.000000
53725     53725     shaanxi        107.9667       37.9667           88       152     2012      04        05        096              0.126083       9.360382       0.000000       0.189876       0.080000   -9999.000000       0.072500       0.218000
53725     53725     shaanxi        107.9667       37.9667           88       152     2012      04        06        097              0.120958       8.311157       0.000000       0.187478       0.089000       0.040600       0.069200       0.222000
53725     53725     shaanxi        107.9667       37.9667           88       152     2012      04        07        098              0.114708       9.433319       0.000000       0.188268       0.081000   -9999.000000   -9999.000000       0.123000
53725     53725     shaanxi        107.9667       37.9667           88       152     2012      04        08        099              0.107375      10.836273       0.000000       0.186691       0.078000   -9999.000000       0.071400       0.136000
53725     53725     shaanxi        107.9667       37.9667           88       152     2012      04        09        100              0.099750      13.317200       0.393378       0.184468       0.089500   -9999.000000       0.093700       0.128000
53725     53725     shaanxi        107.9667       37.9667           88       152     2012      04        10        101              0.094750      12.077362       3.315864       0.189636       0.090000   -9999.000000       0.122900       0.610000
53725     53725     shaanxi        107.9667       37.9667           88       152     2012      04        11        102              0.095625      10.979523       5.388016       0.210798   -9999.000000       0.231700       0.088800       0.443000
53725     53725     shaanxi        107.9667       37.9667           88       152     2012      04        12        103              0.134292       2.267761       2.290833       0.197012       0.134000   -9999.000000       0.121300       0.353000
53725     53725     shaanxi        107.9667       37.9667           88       152     2012      04        13        104              0.136417       5.525909       0.057006       0.218030   -9999.000000   -9999.000000       0.091500   -9999.000000
53725     53725     shaanxi        107.9667       37.9667           88       152     2012      04        14        105              0.125625      10.431061       0.000000       0.216299       0.080500   -9999.000000       0.080700       0.390000
53725     53725     shaanxi        107.9667       37.9667           88       152     2012      04        15        106              0.113625      11.454254       0.000000       0.209001       0.077500   -9999.000000       0.080600       0.296000
53725     53725     shaanxi        107.9667       37.9667           88       152     2012      04        16        107              0.103667      12.904480       0.000000       0.202996       0.071000   -9999.000000       0.072600       0.232000
53725     53725     shaanxi        107.9667       37.9667           88       152     2012      04        17        108              0.095458      13.640076       1.067134       0.198943       0.077000   -9999.000000       0.077900       0.257000
53725     53725     shaanxi        107.9667       37.9667           88       152     2012      04        18        109              0.090208      12.643585       0.000000       0.198168       0.080000   -9999.000000   -9999.000000   -9999.000000
53725     53725     shaanxi        107.9667       37.9667           88       152     2012      04        19        110              0.084792      13.757111       2.819265       0.194497       0.077000       0.158600       0.067500       0.150000
53725     53725     shaanxi        107.9667       37.9667           88       152     2012      04        20        111              0.081000      13.406006       0.366668       0.191083       0.072500   -9999.000000       0.071200       0.277000
53725     53725     shaanxi        107.9667       37.9667           88       152     2012      04        21        112              0.077000      13.884338       0.000000       0.187984       0.068000   -9999.000000       0.073800       0.254000
53725     53725     shaanxi        107.9667       37.9667           88       152     2012      04        22        113              0.074125      15.756104       0.000000       0.184482       0.078000       0.055400   -9999.000000       0.259000
53725     53725     shaanxi        107.9667       37.9667           88       152     2012      04        23        114              0.069958      18.874054       5.715186       0.179340       0.077000   -9999.000000       0.071000   -9999.000000
53725     53725     shaanxi        107.9667       37.9667           88       152     2012      04        24        115              0.065875      16.539246       0.000000       0.196963       0.073000       0.150400   -9999.000000       0.139000
53725     53725     shaanxi        107.9667       37.9667           88       152     2012      04        25        116              0.000000      11.381256       0.000000       0.209071       0.075000   -9999.000000       0.075600       0.198000
53725     53725     shaanxi        107.9667       37.9667           88       152     2012      04        26        117              0.062542      11.291412       0.237370       0.196546       0.070500   -9999.000000       0.079700       0.228000
53725     53725     shaanxi        107.9667       37.9667           88       152     2012      04        27        118              0.060208      14.707458       0.000000       0.188920       0.082000   -9999.000000       0.071000       0.177000
53725     53725     shaanxi        107.9667       37.9667           88       152     2012      04        28        119              0.059042      15.521057       0.000000       0.183635       0.074500   -9999.000000       0.072600   -9999.000000
53725     53725     shaanxi        107.9667       37.9667           88       152     2012      04        29        120              0.058792      17.976196       0.000000       0.179238       0.070000       0.084600       0.073000       0.154000
53725     53725     shaanxi        107.9667       37.9667           88       152     2012      04        30        121              0.118333      20.349640       9.871997       0.174686       0.122000   -9999.000000       0.154500       0.713000
53725     53725     shaanxi        107.9667       37.9667           88       152     2012      05        01        122              0.180625      16.686218       0.315175       0.227623       0.131000   -9999.000000       0.112600       0.620000
53725     53725     shaanxi        107.9667       37.9667           88       152     2012      05        02        123              0.159125      15.387360       0.000000       0.223336       0.073000       0.175800       0.093600       0.367000
53725     53725     shaanxi        107.9667       37.9667           88       152     2012      05        03        124              0.147917      17.233490       0.437516       0.211155       0.087000   -9999.000000       0.090300   -9999.000000
53725     53725     shaanxi        107.9667       37.9667           88       152     2012      05        04        125              0.133083      16.921753       0.000000       0.209218       0.077000   -9999.000000       0.071600       0.337000
53725     53725     shaanxi        107.9667       37.9667           88       152     2012      05        05        126              0.110750      19.587036       0.000000       0.199266       0.075000   -9999.000000   -9999.000000       0.333000
53725     53725     shaanxi        107.9667       37.9667           88       152     2012      05        06        127              0.095542      20.760376       0.259939       0.190868       0.078000   -9999.000000       0.074100       0.218000
53725     53725     shaanxi        107.9667       37.9667           88       152     2012      05        07        128              0.089417      19.958405       0.000000       0.187571   -9999.000000       0.299000       0.081000       0.213000
53725     53725     shaanxi        107.9667       37.9667           88       152     2012      05        08        129              0.084583      20.677826       0.160058       0.186200       0.077000   -9999.000000       0.085300       0.154000
53725     53725     shaanxi        107.9667       37.9667           88       152     2012      05        09        130              0.080042      21.604431       0.458093       0.184002   -9999.000000   -9999.000000       0.080800       0.334000
53725     53725     shaanxi        107.9667       37.9667           88       152     2012      05        10        131              0.076542      22.723022       2.336668       0.183157       0.110000   -9999.000000       0.071600   -9999.000000
53725     53725     shaanxi        107.9667       37.9667           88       152     2012      05        11        132              0.071542      21.111511       0.000000       0.195083       0.076500   -9999.000000   -9999.000000       0.239000
53725     53725     shaanxi        107.9667       37.9667           88       152     2012      05        12        133              0.067208      17.409790       0.000000       0.190111       0.074000       0.185100       0.080300   -9999.000000
53725     53725     shaanxi        107.9667       37.9667           88       152     2012      05        13        134              0.062042      16.265289       0.000000       0.182378       0.077000   -9999.000000       0.084700       0.162000
53725     53725     shaanxi        107.9667       37.9667           88       152     2012      05        14        135              0.060833      12.828979       0.000000       0.180991       0.074000       0.596300       0.078800       0.217000
53725     53725     shaanxi        107.9667       37.9667           88       152     2012      05        15        136              0.059500      15.363129       0.000000       0.176226       0.070000   -9999.000000       0.075800       0.252000
53725     53725     shaanxi        107.9667       37.9667           88       152     2012      05        16        137              0.057667      16.780548       0.000000       0.171238       0.073500       0.147900       0.075100       0.156000
53725     53725     shaanxi        107.9667       37.9667           88       152     2012      05        17        138              0.057208      17.272705       0.000000       0.167317       0.073500       0.141500       0.081500   -9999.000000
53725     53725     shaanxi        107.9667       37.9667           88       152     2012      05        18        139              0.056083      20.371979       0.170079       0.162978       0.068000   -9999.000000       0.080900       0.182000
53725     53725     shaanxi        107.9667       37.9667           88       152     2012      05        19        140              0.055500      21.746582       0.000000       0.160816       0.077000   -9999.000000       0.080700       0.319000
53725     53725     shaanxi        107.9667       37.9667           88       152     2012      05        20        141              0.055625      23.144684       1.887680       0.156514   -9999.000000   -9999.000000       0.075400       0.220000
53725     53725     shaanxi        107.9667       37.9667           88       152     2012      05        21        142              0.071542      22.847687       1.298730       0.161783       0.148000   -9999.000000       0.148700       0.420000
53725     53725     shaanxi        107.9667       37.9667           88       152     2012      05        22        143              0.080083      14.396057       0.798034       0.194170       0.080000   -9999.000000   -9999.000000   -9999.000000
53725     53725     shaanxi        107.9667       37.9667           88       152     2012      05        23        144              0.078083      17.782990       0.165164       0.179583   -9999.000000       0.089100       0.082000       0.214000
53725     53725     shaanxi        107.9667       37.9667           88       152     2012      05        24        145              0.080958      14.927246       0.000000       0.179058       0.076000   -9999.000000       0.082100       0.191000
53725     53725     shaanxi        107.9667       37.9667           88       152     2012      05        25        146              0.000000      17.912628       0.000000       0.174157       0.077000       0.135400       0.081200       0.225000
53725     53725     shaanxi        107.9667       37.9667           88       152     2012      05        26        147              0.074542      18.888123       0.000000       0.168522       0.070000   -9999.000000       0.071400       0.204000
53725     53725     shaanxi        107.9667       37.9667           88       152     2012      05        27        148              0.070958      21.348785       0.000000       0.161252       0.074000       0.447300       0.076000   -9999.000000
53725     53725     shaanxi        107.9667       37.9667           88       152     2012      05        28        149              0.123167      23.780792      15.361201       0.153974       0.083000       0.053200   -9999.000000       0.261000
53725     53725     shaanxi        107.9667       37.9667           88       152     2012      05        29        150              0.161833      18.937439       0.000000       0.223882       0.087000   -9999.000000       0.087000       0.283000
53725     53725     shaanxi        107.9667       37.9667           88       152     2012      05        30        151              0.132792      18.703064       0.000000       0.220508       0.084000       0.155600       0.083800   -9999.000000
53725     53725     shaanxi        107.9667       37.9667           88       152     2012      05        31        152              0.104083      19.589569       4.898390       0.204171       0.103000   -9999.000000       0.082900   -9999.000000
53725     53725     shaanxi        107.9667       37.9667           88       152     2012      06        01        153              0.088292      20.512512       1.138640       0.221455       0.073000   -9999.000000       0.072500   -9999.000000
53725     53725     shaanxi        107.9667       37.9667           88       152     2012      06        02        154              0.157500      21.464935       0.914081       0.205357       0.088500       0.254900       0.095700       0.595000
53725     53725     shaanxi        107.9667       37.9667           88       152     2012      06        03        155              0.186000      18.892242       0.000000       0.207200       0.075000   -9999.000000   -9999.000000       0.356000
53725     53725     shaanxi        107.9667       37.9667           88       152     2012      06        04        156              0.161667      22.080597       0.325589       0.198846       0.076000       0.155800       0.077300       0.237000
53725     53725     shaanxi        107.9667       37.9667           88       152     2012      06        05        157              0.141792      23.005646       1.311594       0.189431       0.098000   -9999.000000       0.102600       0.429000
53725     53725     shaanxi        107.9667       37.9667           88       152     2012      06        06        158              0.132417      20.004852       1.176440       0.197798       0.076500   -9999.000000       0.071800       0.526000
53725     53725     shaanxi        107.9667       37.9667           88       152     2012      06        07        159              0.109125      20.447937       3.423415       0.194069       0.071500   -9999.000000       0.077600       0.415000
53725     53725     shaanxi        107.9667       37.9667           88       152     2012      06        08        160              0.091792      19.695099       5.198319       0.212355       0.068000   -9999.000000   -9999.000000       0.307000
53725     53725     shaanxi        107.9667       37.9667           88       152     2012      06        09        161              0.082792      20.882507       0.000000       0.198771       0.078000       0.107200       0.074800       0.191000
53725     53725     shaanxi        107.9667       37.9667           88       152     2012      06        10        162              0.073875      23.084503      10.343345       0.185333       0.067000   -9999.000000       0.078800   -9999.000000
53725     53725     shaanxi        107.9667       37.9667           88       152     2012      06        11        163              0.000000      20.132080       0.000000       0.177303       0.074500       0.177000       0.071600       0.194000
53725     53725     shaanxi        107.9667       37.9667           88       152     2012      06        12        164              0.062292      21.308472       0.000000       0.171310       0.074500       0.187500       0.077800       0.273000
53725     53725     shaanxi        107.9667       37.9667           88       152     2012      06        13        165              0.057583      23.299622       0.000000       0.164246       0.075000   -9999.000000       0.072900       0.314000
53725     53725     shaanxi        107.9667       37.9667           88       152     2012      06        14        166              0.053958      22.077362       0.000000       0.159521       0.081000   -9999.000000   -9999.000000       0.221000
53725     53725     shaanxi        107.9667       37.9667           88       152     2012      06        15        167              0.052208      20.924408       0.000000       0.158699       0.068000   -9999.000000       0.075900   -9999.000000
53725     53725     shaanxi        107.9667       37.9667           88       152     2012      06        16        168              0.050833      21.786743       0.000000       0.156073       0.070000   -9999.000000       0.078800       0.149000
53725     53725     shaanxi        107.9667       37.9667           88       152     2012      06        17        169              0.049958      23.806396       0.000000       0.151626       0.074500   -9999.000000       0.076300       0.299000
53725     53725     shaanxi        107.9667       37.9667           88       152     2012      06        18        170              0.074500      25.675873       0.212579       0.146885       0.079000   -9999.000000       0.085100       0.202000
53725     53725     shaanxi        107.9667       37.9667           88       152     2012      06        19        171              0.092083      23.424286       1.567581       0.146530       0.086000   -9999.000000       0.076200       0.171000
53725     53725     shaanxi        107.9667       37.9667           88       152     2012      06        20        172              0.083208      23.597565       0.000000       0.162670       0.094000   -9999.000000       0.081000   -9999.000000
53725     53725     shaanxi        107.9667       37.9667           88       152     2012      06        21        173              0.079833      25.275940       1.409735       0.158332       0.076000   -9999.000000       0.072300       0.197000
53725     53725     shaanxi        107.9667       37.9667           88       152     2012      06        22        174              0.076792      25.246857       2.519532       0.165375       0.083500       0.124600       0.088800       0.346000
53725     53725     shaanxi        107.9667       37.9667           88       152     2012      06        23        175              0.076250      25.083649       6.735161       0.175685   -9999.000000   -9999.000000       0.097400       0.235000
53725     53725     shaanxi        107.9667       37.9667           88       152     2012      06        24        176              0.077958      23.865265       0.055801       0.216721       0.067000       0.317800       0.075700       0.370000
53725     53725     shaanxi        107.9667       37.9667           88       152     2012      06        25        177              0.147625      25.353302       0.176050       0.195230       0.091000   -9999.000000   -9999.000000   -9999.000000
53725     53725     shaanxi        107.9667       37.9667           88       152     2012      06        26        178              0.149375      25.542786       0.266323       0.181247       0.080000   -9999.000000       0.081900       0.213000
53725     53725     shaanxi        107.9667       37.9667           88       152     2012      06        27        179              0.220000      24.554108      42.101574       0.175213       0.166000   -9999.000000       0.147100       0.798000
53725     53725     shaanxi        107.9667       37.9667           88       152     2012      06        28        180              0.222250      19.731323      15.438810       0.298490       0.155500   -9999.000000       0.132600       0.591000
53725     53725     shaanxi        107.9667       37.9667           88       152     2012      06        29        181              0.210667      22.240540       0.076530       0.288224       0.113000   -9999.000000       0.109000   -9999.000000
53725     53725     shaanxi        107.9667       37.9667           88       152     2012      06        30        182              0.191250      23.011139       0.000000       0.266120       0.098000       0.313000       0.088100   -9999.000000
53725     53725     shaanxi        107.9667       37.9667           88       152     2012      07        01        183              0.176208      23.918304       0.000000       0.247369       0.085000   -9999.000000   -9999.000000       0.429000
53725     53725     shaanxi        107.9667       37.9667           88       152     2012      07        02        184              0.157875      24.563934       0.000000       0.238489       0.086000       0.117900       0.086900       0.381000
53725     53725     shaanxi        107.9667       37.9667           88       152     2012      07        03        185              0.137833      25.888153       0.915382       0.229982       0.098500       0.135000       0.111600       0.318000
53725     53725     shaanxi        107.9667       37.9667           88       152     2012      07        04        186              0.119917      24.119873       3.084976       0.229593       0.077000   -9999.000000       0.108600       0.445000
53725     53725     shaanxi        107.9667       37.9667           88       152     2012      07        05        187              0.102792      23.414062       0.000000       0.238930       0.085000   -9999.000000       0.078800       0.283000
53725     53725     shaanxi        107.9667       37.9667           88       152     2012      07        06        188              0.102125      25.674133       2.298805       0.224950       0.101000   -9999.000000   -9999.000000       0.371000
53725     53725     shaanxi        107.9667       37.9667           88       152     2012      07        07        189              0.125125      24.274719       0.096310       0.226414   -9999.000000   -9999.000000       0.084400       0.414000
53725     53725     shaanxi        107.9667       37.9667           88       152     2012      07        08        190              0.117125      22.971252       0.267070       0.228523       0.083500   -9999.000000       0.079000       0.339000
53725     53725     shaanxi        107.9667       37.9667           88       152     2012      07        09        191              0.102833      22.559875       0.000000       0.224489       0.072000   -9999.000000       0.079700   -9999.000000
53725     53725     shaanxi        107.9667       37.9667           88       152     2012      07        10        192              0.091417      23.764709       0.042751       0.217771       0.080000       0.149100       0.075200       0.235000
53725     53725     shaanxi        107.9667       37.9667           88       152     2012      07        11        193              0.084083      24.989014       0.000000       0.208940       0.076000   -9999.000000       0.075700       0.292000
53725     53725     shaanxi        107.9667       37.9667           88       152     2012      07        12        194              0.080042      25.303833       0.000000       0.202122       0.075000   -9999.000000   -9999.000000       0.319000
53725     53725     shaanxi        107.9667       37.9667           88       152     2012      07        13        195              0.124292      25.693420       0.429226       0.196117       0.077000   -9999.000000       0.080700       0.346000
53725     53725     shaanxi        107.9667       37.9667           88       152     2012      07        14        196              0.132083      24.727356       0.127697       0.197470       0.078500       0.159400       0.078700   -9999.000000
53725     53725     shaanxi        107.9667       37.9667           88       152     2012      07        15        197              0.107542      24.671661       0.000000       0.195542       0.069000   -9999.000000       0.075600       0.246000
53725     53725     shaanxi        107.9667       37.9667           88       152     2012      07        16        198              0.092792      25.731995       0.000000       0.191320       0.080000   -9999.000000       0.077900       0.399000
53725     53725     shaanxi        107.9667       37.9667           88       152     2012      07        17        199              0.085667      26.668274       2.953297       0.187218       0.086000   -9999.000000       0.068200       0.249000
53725     53725     shaanxi        107.9667       37.9667           88       152     2012      07        18        200              0.081208      25.545990       0.435781       0.204257       0.094000       0.193100       0.109200       0.399000
53725     53725     shaanxi        107.9667       37.9667           88       152     2012      07        19        201              0.078458      24.271301       0.598007       0.204761       0.085000   -9999.000000       0.085700   -9999.000000
53725     53725     shaanxi        107.9667       37.9667           88       152     2012      07        20        202              0.097522      25.921143      26.552507       0.200280       0.084000       0.462400       0.169900       0.273000
53725     53725     shaanxi        107.9667       37.9667           88       152     2012      07        21        203              0.193261      24.716766       1.687484       0.237060       0.175000       0.212300       0.143100       0.599000
53725     53725     shaanxi        107.9667       37.9667           88       152     2012      07        22        204              0.169875      21.059784       0.000000       0.269214       0.110000   -9999.000000       0.097600       0.578000
53725     53725     shaanxi        107.9667       37.9667           88       152     2012      07        23        205              0.148833      23.537170       0.000000       0.240971       0.103000       0.236300   -9999.000000       0.394000
53725     53725     shaanxi        107.9667       37.9667           88       152     2012      07        24        206              0.157583      23.952576      19.124891       0.229999       0.087000   -9999.000000       0.154500   -9999.000000
53725     53725     shaanxi        107.9667       37.9667           88       152     2012      07        25        207              0.194917      24.960785       0.055437       0.254966       0.119500       0.166400       0.111200       0.715000
53725     53725     shaanxi        107.9667       37.9667           88       152     2012      07        26        208              0.173625      25.923492       1.265463       0.261481       0.094000       0.271700       0.101800       0.540000
53725     53725     shaanxi        107.9667       37.9667           88       152     2012      07        27        209              0.179042      27.028748      27.815186       0.247650       0.100000       0.315600       0.084800       0.449000
53725     53725     shaanxi        107.9667       37.9667           88       152     2012      07        28        210              0.196083      24.729767       0.938465       0.294513       0.118000       0.420200       0.116400       0.542000
53725     53725     shaanxi        107.9667       37.9667           88       152     2012      07        29        211              0.171750      26.773010       5.823098       0.270699       0.101000   -9999.000000   -9999.000000   -9999.000000
53725     53725     shaanxi        107.9667       37.9667           88       152     2012      07        30        212              0.156917      26.848755       3.944192       0.261301       0.139500   -9999.000000       0.123900       0.668000
53725     53725     shaanxi        107.9667       37.9667           88       152     2012      07        31        213              0.138750      19.977142       1.130860       0.274622       0.094000       0.231800       0.106700       0.516000
53725     53725     shaanxi        107.9667       37.9667           88       152     2012      08        01        214              0.114083      24.546295       0.000000       0.254436       0.090000   -9999.000000       0.098600       0.439000
53725     53725     shaanxi        107.9667       37.9667           88       152     2012      08        02        215              0.099042      25.222046      21.040607       0.244544       0.100000   -9999.000000       0.089400       0.306000
53725     53725     shaanxi        107.9667       37.9667           88       152     2012      08        03        216              0.091792      25.904114       0.000000       0.235981       0.095000   -9999.000000       0.087800       0.340000
53725     53725     shaanxi        107.9667       37.9667           88       152     2012      08        04        217              0.086208      26.677399       0.000000       0.231341       0.088500   -9999.000000       0.095200       0.411000
53725     53725     shaanxi        107.9667       37.9667           88       152     2012      08        05        218              0.081500      25.933441       0.000000       0.226480       0.087500   -9999.000000       0.091400       0.353000
53725     53725     shaanxi        107.9667       37.9667           88       152     2012      08        06        219              0.078167      25.864349       1.039998       0.222689       0.096000       0.088400       0.093000       0.394000
53725     53725     shaanxi        107.9667       37.9667           88       152     2012      08        07        220              0.073792      26.280029       0.000000       0.221316       0.093000   -9999.000000       0.081700   -9999.000000
53725     53725     shaanxi        107.9667       37.9667           88       152     2012      08        08        221              0.069750      25.352753       0.000000       0.215351       0.086000       0.284200       0.083900       0.244000
53725     53725     shaanxi        107.9667       37.9667           88       152     2012      08        09        222              0.068458      24.105103       0.000000       0.211458       0.088500   -9999.000000   -9999.000000       0.436000
53725     53725     shaanxi        107.9667       37.9667           88       152     2012      08        10        223              0.066542      25.695129       0.000000       0.205830       0.083500       0.250100       0.086000       0.317000
53725     53725     shaanxi        107.9667       37.9667           88       152     2012      08        11        224              0.063875      26.925049       0.461807       0.202481       0.080000   -9999.000000       0.093600       0.513000
53725     53725     shaanxi        107.9667       37.9667           88       152     2012      08        12        225              0.063792      23.268890       0.000000       0.207627       0.102000       0.152900       0.087500   -9999.000000
53725     53725     shaanxi        107.9667       37.9667           88       152     2012      08        13        226              0.074125      23.931427       3.717774       0.201855       0.146000       0.061800       0.112800       0.264000
53725     53725     shaanxi        107.9667       37.9667           88       152     2012      08        14        227              0.095792      22.938568       0.303372       0.217117       0.100000   -9999.000000       0.101400       0.423000
53725     53725     shaanxi        107.9667       37.9667           88       152     2012      08        15        228              0.088167      22.762909       0.000000       0.214718       0.094000       0.122300   -9999.000000       0.370000
53725     53725     shaanxi        107.9667       37.9667           88       152     2012      08        16        229              0.081375      23.954956       1.866231       0.204265       0.089000   -9999.000000       0.147900       0.509000
53725     53725     shaanxi        107.9667       37.9667           88       152     2012      08        17        230              0.135042      25.574463       3.467575       0.207710       0.163000   -9999.000000       0.171100   -9999.000000
53725     53725     shaanxi        107.9667       37.9667           88       152     2012      08        18        231              0.136750      22.298492       0.088376       0.230228       0.121000       0.196200       0.117300       0.548000
53725     53725     shaanxi        107.9667       37.9667           88       152     2012      08        19        232              0.113542      21.198181       0.000000       0.216772       0.110000   -9999.000000       0.101500       0.464000
53725     53725     shaanxi        107.9667       37.9667           88       152     2012      08        20        233              0.093708      23.489960       0.000000       0.207060       0.098500       0.178000       0.095700       0.350000
53725     53725     shaanxi        107.9667       37.9667           88       152     2012      08        21        234              0.082333      21.306305       0.000000       0.199901       0.091500   -9999.000000       0.102300   -9999.000000
53725     53725     shaanxi        107.9667       37.9667           88       152     2012      08        22        235              0.076208      19.684662       0.000000       0.195081       0.094000   -9999.000000       0.099700   -9999.000000
53725     53725     shaanxi        107.9667       37.9667           88       152     2012      08        23        236              0.072208      21.540314       0.000000       0.192054       0.103000       0.128600       0.106000       0.315000
53725     53725     shaanxi        107.9667       37.9667           88       152     2012      08        24        237              0.069000      22.533112       0.000000       0.190259   -9999.000000   -9999.000000       0.092000   -9999.000000
53725     53725     shaanxi        107.9667       37.9667           88       152     2012      08        25        238              0.000000      23.166840       0.000000       0.186824       0.108000   -9999.000000       0.096800   -9999.000000
53725     53725     shaanxi        107.9667       37.9667           88       152     2012      08        26        239              0.079167      22.097076       0.000000       0.186230       0.095500   -9999.000000   -9999.000000       0.271000
53725     53725     shaanxi        107.9667       37.9667           88       152     2012      08        27        240              0.075333      23.483795       7.266159       0.183534       0.082000   -9999.000000       0.085900   -9999.000000
53725     53725     shaanxi        107.9667       37.9667           88       152     2012      08        28        241              0.071667      22.493378       0.000000       0.231749       0.101000       0.340200       0.087700       0.343000
53725     53725     shaanxi        107.9667       37.9667           88       152     2012      08        29        242              0.067792      23.551758       0.000000       0.208121       0.095000   -9999.000000       0.082800       0.433000
53725     53725     shaanxi        107.9667       37.9667           88       152     2012      08        30        243              0.096042      23.819977      17.659058       0.195021   -9999.000000   -9999.000000       0.083100       0.534000
53725     53725     shaanxi        107.9667       37.9667           88       152     2012      08        31        244              0.212167      23.367859      25.679316       0.227404       0.155500   -9999.000000       0.130300       0.537000
53725     53725     shaanxi        107.9667       37.9667           88       152     2012      09        01        245              0.224125      20.312866      14.722466       0.284255       0.172500   -9999.000000   -9999.000000       0.930000
53725     53725     shaanxi        107.9667       37.9667           88       152     2012      09        02        246              0.203208      13.939575       0.000000       0.300266       0.142000   -9999.000000       0.107500       0.583000
53725     53725     shaanxi        107.9667       37.9667           88       152     2012      09        03        247              0.193750      17.869385       0.000000       0.265651       0.120500   -9999.000000       0.110200   -9999.000000
53725     53725     shaanxi        107.9667       37.9667           88       152     2012      09        04        248              0.188125      17.236176       0.289142       0.254308       0.128000       0.130800       0.098200       0.412000
53725     53725     shaanxi        107.9667       37.9667           88       152     2012      09        05        249              0.183875      17.833801       4.347173       0.248731       0.102000       0.420900       0.097600   -9999.000000
53725     53725     shaanxi        107.9667       37.9667           88       152     2012      09        06        250              0.176333      18.988129       0.386962       0.251767       0.108500       0.215400   -9999.000000       0.365000
53725     53725     shaanxi        107.9667       37.9667           88       152     2012      09        07        251              0.171833      19.448669       0.045299       0.250273       0.096000       0.192400       0.091900       0.414000
53725     53725     shaanxi        107.9667       37.9667           88       152     2012      09        08        252              0.168500      19.059296       0.000000       0.241001       0.105000   -9999.000000       0.083000       0.362000
53725     53725     shaanxi        107.9667       37.9667           88       152     2012      09        09        253              0.160083      20.939484       0.000000       0.235837       0.105000   -9999.000000       0.099000       0.396000
53725     53725     shaanxi        107.9667       37.9667           88       152     2012      09        10        254              0.158667      20.981812      10.757139       0.231282       0.149000       0.237400       0.123200   -9999.000000
53725     53725     shaanxi        107.9667       37.9667           88       152     2012      09        11        255              0.165708      18.069641       2.542360       0.258839       0.127500   -9999.000000       0.116400       0.625000
53725     53725     shaanxi        107.9667       37.9667           88       152     2012      09        12        256              0.156292      15.277496       0.066003       0.263399       0.098000       0.261400   -9999.000000       0.388000
53725     53725     shaanxi        107.9667       37.9667           88       152     2012      09        13        257              0.147667      12.045959       0.000000       0.247836       0.100000   -9999.000000       0.082600       0.408000
53725     53725     shaanxi        107.9667       37.9667           88       152     2012      09        14        258              0.136542      13.917267       0.000000       0.240784       0.098000   -9999.000000       0.086900       0.307000
53725     53725     shaanxi        107.9667       37.9667           88       152     2012      09        15        259              0.124875      15.713959       0.000000       0.235336       0.098000       0.117800       0.077900   -9999.000000
53725     53725     shaanxi        107.9667       37.9667           88       152     2012      09        16        260              0.117042      15.977509       0.000000       0.232651       0.094000   -9999.000000       0.083700       0.318000
53725     53725     shaanxi        107.9667       37.9667           88       152     2012      09        17        261              0.110167      14.929504       1.857534       0.231958       0.103000   -9999.000000       0.113100       0.536000
53725     53725     shaanxi        107.9667       37.9667           88       152     2012      09        18        262              0.103542      15.152313       0.188429       0.238311       0.088000       0.182300       0.083900       0.406000
53725     53725     shaanxi        107.9667       37.9667           88       152     2012      09        19        263              0.097292      16.307129       0.000000       0.231546       0.096000   -9999.000000       0.082900       0.322000
53725     53725     shaanxi        107.9667       37.9667           88       152     2012      09        20        264              0.119667      17.850128       2.144990       0.226245       0.132000       0.043200       0.119900   -9999.000000
53725     53725     shaanxi        107.9667       37.9667           88       152     2012      09        21        265              0.131875      15.341431       1.136881       0.236738   -9999.000000   -9999.000000       0.086000       0.628000
53725     53725     shaanxi        107.9667       37.9667           88       152     2012      09        22        266              0.121958      16.457672       0.000000       0.229913       0.086500       0.171500       0.082200       0.445000
53725     53725     shaanxi        107.9667       37.9667           88       152     2012      09        23        267              0.111125      17.781219       0.000000       0.224290       0.075000       0.155600   -9999.000000       0.300000
53725     53725     shaanxi        107.9667       37.9667           88       152     2012      09        24        268              0.179750      18.551025      17.428940       0.220550   -9999.000000   -9999.000000       0.131100       0.905000
53725     53725     shaanxi        107.9667       37.9667           88       152     2012      09        25        269              0.209083      13.921661       0.205473       0.270267       0.134000   -9999.000000       0.110600   -9999.000000
53725     53725     shaanxi        107.9667       37.9667           88       152     2012      09        26        270              0.191708      13.290924       0.047705       0.260751       0.119000   -9999.000000       0.108100       0.542000
53725     53725     shaanxi        107.9667       37.9667           88       152     2012      09        27        271              0.182000      14.679016       0.000000       0.245646       0.105000   -9999.000000       0.095000       0.418000
53725     53725     shaanxi        107.9667       37.9667           88       152     2012      09        28        272              0.168067      11.549347       1.033013       0.238164       0.098000   -9999.000000       0.089100       0.264000
53725     53725     shaanxi        107.9667       37.9667           88       152     2012      09        29        273              0.162417      10.299530       0.053922       0.239801       0.098000   -9999.000000   -9999.000000       0.270000
53725     53725     shaanxi        107.9667       37.9667           88       152     2012      09        30        274              0.154042      11.418854       0.000000       0.234460       0.100500   -9999.000000       0.087700       0.323000
53725     53725     shaanxi        107.9667       37.9667           88       152     2012      10        01        275              0.144333      13.327850       0.000000       0.230588       0.087000   -9999.000000       0.072100       0.350000
53725     53725     shaanxi        107.9667       37.9667           88       152     2012      10        02        276              0.134000      15.167023       0.637088       0.227841       0.085000   -9999.000000       0.073300   -9999.000000
53725     53725     shaanxi        107.9667       37.9667           88       152     2012      10        03        277              0.126000      13.919891       2.527052       0.224939       0.095000       0.229600       0.070200       0.350000
53725     53725     shaanxi        107.9667       37.9667           88       152     2012      10        04        278              0.143000      15.048462       0.560382       0.227690       0.088000   -9999.000000       0.083400   -9999.000000
53725     53725     shaanxi        107.9667       37.9667           88       152     2012      10        05        279              0.135833      12.497223       0.000000       0.235379       0.092000       0.187900       0.074500       0.393000
53725     53725     shaanxi        107.9667       37.9667           88       152     2012      10        06        280              0.126917      12.637115       0.000000       0.227551       0.104000       0.117100       0.078200       0.340000
53725     53725     shaanxi        107.9667       37.9667           88       152     2012      10        07        281              0.119375      14.181946       0.194876       0.224560       0.090000   -9999.000000       0.074800       0.298000
53725     53725     shaanxi        107.9667       37.9667           88       152     2012      10        08        282              0.152708      13.058868       4.657547       0.223906       0.090000       0.166100       0.115300       0.735000
53725     53725     shaanxi        107.9667       37.9667           88       152     2012      10        09        283              0.169542      11.846191       0.055643       0.242089       0.096000   -9999.000000       0.097800   -9999.000000
53725     53725     shaanxi        107.9667       37.9667           88       152     2012      10        10        284              0.158875      10.440826       0.915170       0.233043       0.094000   -9999.000000   -9999.000000       0.348000
53725     53725     shaanxi        107.9667       37.9667           88       152     2012      10        11        285              0.148042      11.488708       0.000000       0.232654       0.091000       0.192100       0.081800       0.400000
53725     53725     shaanxi        107.9667       37.9667           88       152     2012      10        12        286              0.135167      11.454773       0.000000       0.225658       0.087000       0.309800       0.085500       0.361000
53725     53725     shaanxi        107.9667       37.9667           88       152     2012      10        13        287              0.124875      10.866974       0.000000       0.222247       0.088000       0.167000       0.078800       0.326000
53725     53725     shaanxi        107.9667       37.9667           88       152     2012      10        14        288              0.117292      11.009918       0.000000       0.221070       0.086000   -9999.000000       0.081500   -9999.000000
53725     53725     shaanxi        107.9667       37.9667           88       152     2012      10        15        289              0.138250      11.108063       0.982320       0.221294       0.077000   -9999.000000       0.086600       0.221000
53725     53725     shaanxi        107.9667       37.9667           88       152     2012      10        16        290              0.166458      10.467377       0.218535       0.225038       0.117000   -9999.000000   -9999.000000       0.298000
53725     53725     shaanxi        107.9667       37.9667           88       152     2012      10        17        291              0.156500       6.239166       1.222351       0.213262   -9999.000000   -9999.000000       0.080600       0.380000
53725     53725     shaanxi        107.9667       37.9667           88       152     2012      10        18        292              0.150000       7.294220       0.000000       0.225180   -9999.000000   -9999.000000       0.090100       0.244000
53725     53725     shaanxi        107.9667       37.9667           88       152     2012      10        19        293              0.143250       6.696625       0.000000       0.222635       0.088000   -9999.000000       0.078200   -9999.000000
53725     53725     shaanxi        107.9667       37.9667           88       152     2012      10        20        294              0.135125       9.968292       0.057955       0.220439       0.081000   -9999.000000       0.079400       0.281000
53725     53725     shaanxi        107.9667       37.9667           88       152     2012      10        21        295              0.173625      12.389221       1.523917       0.219052       0.142000       0.203500       0.111300       0.365000
53725     53725     shaanxi        107.9667       37.9667           88       152     2012      10        22        296              0.169500       5.536407       0.310463       0.221693   -9999.000000   -9999.000000       0.078100       0.324000
53725     53725     shaanxi        107.9667       37.9667           88       152     2012      10        23        297              0.160375       5.984772       0.058207       0.220347   -9999.000000       0.413500       0.077800       0.254000
53725     53725     shaanxi        107.9667       37.9667           88       152     2012      10        24        298              0.150833       6.879242       0.000000       0.218103   -9999.000000   -9999.000000       0.082000   -9999.000000
53725     53725     shaanxi        107.9667       37.9667           88       152     2012      10        25        299              0.000000       6.945129       0.104216       0.214609       0.088000   -9999.000000       0.072800       0.261000
53725     53725     shaanxi        107.9667       37.9667           88       152     2012      10        26        300              0.135500       8.418182       0.304382       0.217665       0.089000       0.135400       0.076000       0.301000
53725     53725     shaanxi        107.9667       37.9667           88       152     2012      10        27        301              0.128000       7.660583       0.000000       0.218465       0.094000   -9999.000000   -9999.000000       0.241000
53725     53725     shaanxi        107.9667       37.9667           88       152     2012      10        28        302              0.000000       8.533234       0.000000       0.217168       0.089000   -9999.000000       0.073400       0.219000
53725     53725     shaanxi        107.9667       37.9667           88       152     2012      10        29        303              0.115167       8.998596       0.377931       0.216413       0.090000       0.230400       0.074400       0.190000
53725     53725     shaanxi        107.9667       37.9667           88       152     2012      10        30        304              0.110417       5.159485       0.000000       0.196639       0.088000   -9999.000000       0.069600       0.241000
53725     53725     shaanxi        107.9667       37.9667           88       152     2012      10        31        305              0.108250       3.940887       0.827331       0.191498       0.081000       0.144100       0.071900   -9999.000000
53725     53725     shaanxi        107.9667       37.9667           88       152     2012      11        01        306              0.106792       4.052002       0.000000       0.189601       0.091000   -9999.000000       0.067700       0.247000
53725     53725     shaanxi        107.9667       37.9667           88       152     2012      11        02        307              0.106250       4.790955       0.110308       0.204067   -9999.000000       0.089400   -9999.000000   -9999.000000
53725     53725     shaanxi        107.9667       37.9667           88       152     2012      11        03        308              0.099750       6.079010       0.000000       0.203289   -9999.000000       0.203200       0.069400       0.252000
53725     53725     shaanxi        107.9667       37.9667           88       152     2012      11        04        309              0.096333      -1.123779       0.000000       0.139799       0.092000   -9999.000000       0.072800       0.114000
53725     53725     shaanxi        107.9667       37.9667           88       152     2012      11        05        310              0.100625      -1.515228       0.000000       0.121588       0.092000   -9999.000000       0.072500   -9999.000000
53725     53725     shaanxi        107.9667       37.9667           88       152     2012      11        06        311              0.104417       0.144531       0.000000       0.137826       0.097000       0.058600       0.073100       0.157000
53725     53725     shaanxi        107.9667       37.9667           88       152     2012      11        07        312              0.104792       1.468048       9.532516       0.162242   -9999.000000   -9999.000000   -9999.000000   -9999.000000
53725     53725     shaanxi        107.9667       37.9667           88       152     2012      11        08        313              0.104417       1.973236       0.000000       0.181580   -9999.000000   -9999.000000       0.073100       0.165000
53725     53725     shaanxi        107.9667       37.9667           88       152     2012      11        09        314              0.102000       2.977081       0.116524       0.221495       0.093000   -9999.000000       0.062500       0.266000
53725     53725     shaanxi        107.9667       37.9667           88       152     2012      11        10        315              0.098875       2.808838       1.326191       0.204075       0.118000       0.154900       0.070600       0.325000
53725     53725     shaanxi        107.9667       37.9667           88       152     2012      11        11        316              0.099292      -1.382599       0.000000       0.133966       0.096000   -9999.000000       0.071300       0.096000
53725     53725     shaanxi        107.9667       37.9667           88       152     2012      11        12        317              0.101375      -0.892029       0.000000       0.125383       0.099000   -9999.000000       0.069300   -9999.000000
53725     53725     shaanxi        107.9667       37.9667           88       152     2012      11        13        318              0.000000      -0.461426       0.000000       0.135461   -9999.000000       0.094000   -9999.000000       0.132000
53725     53725     shaanxi        107.9667       37.9667           88       152     2012      11        14        319              0.106708       0.269226       0.000000       0.143162       0.093000   -9999.000000       0.070600       0.218000
53725     53725     shaanxi        107.9667       37.9667           88       152     2012      11        15        320              0.109833       1.323456       3.463099       0.162961   -9999.000000   -9999.000000       0.053400       0.260000
53725     53725     shaanxi        107.9667       37.9667           88       152     2012      11        16        321              0.123333      -2.094910       0.000000       0.118785       0.115000       0.051800       0.068100       0.200000
53725     53725     shaanxi        107.9667       37.9667           88       152     2012      11        17        322              0.000000      -0.942200       0.000000       0.126318       0.132000       0.127600       0.092700   -9999.000000
53725     53725     shaanxi        107.9667       37.9667           88       152     2012      11        18        323              0.152542       0.715271       0.202267       0.153076   -9999.000000       0.123500       0.080100       0.337000
53725     53725     shaanxi        107.9667       37.9667           88       152     2012      11        19        324              0.153708       0.285431       0.000000       0.145358   -9999.000000   -9999.000000       0.077400       0.257000
53725     53725     shaanxi        107.9667       37.9667           88       152     2012      11        20        325              0.159625       0.986908       0.000000       0.159196       0.107000   -9999.000000       0.067600       0.361000
53725     53725     shaanxi        107.9667       37.9667           88       152     2012      11        21        326              0.157375       1.006256       0.000000       0.168642       0.099000   -9999.000000       0.074700       0.280000
53725     53725     shaanxi        107.9667       37.9667           88       152     2012      11        22        327              0.150250       1.795898       0.000000       0.177948   -9999.000000   -9999.000000       0.071500   -9999.000000
53725     53725     shaanxi        107.9667       37.9667           88       152     2012      11        23        328              0.135500      -1.499176       0.000000       0.122260       0.099000       0.103900       0.067100       0.134000
53725     53725     shaanxi        107.9667       37.9667           88       152     2012      11        24        329              0.136167      -1.909851       0.039790       0.116426   -9999.000000   -9999.000000   -9999.000000       0.215000
53725     53725     shaanxi        107.9667       37.9667           88       152     2012      11        25        330              0.130875      -0.298828       0.000000       0.133848   -9999.000000       0.164700       0.068300       0.167000
53725     53725     shaanxi        107.9667       37.9667           88       152     2012      11        26        331              0.116625      -2.992676       1.476703       0.103525       0.091000   -9999.000000   -9999.000000       0.069000
53725     53725     shaanxi        107.9667       37.9667           88       152     2012      11        27        332              0.112375      -1.934235       0.000000       0.116620       0.087000   -9999.000000       0.070600       0.106000
53725     53725     shaanxi        107.9667       37.9667           88       152     2012      11        28        333              0.089042      -2.833405       0.000000       0.117827   -9999.000000       0.180200       0.068400       0.064000
53725     53725     shaanxi        107.9667       37.9667           88       152     2012      11        29        334              0.092625      -4.374634       0.000000       0.088917   -9999.000000   -9999.000000       0.063800       0.210000
53725     53725     shaanxi        107.9667       37.9667           88       152     2012      11        30        335              0.087792      -3.091370       0.000000       0.102863   -9999.000000   -9999.000000   -9999.000000       0.104000
53725     53725     shaanxi        107.9667       37.9667           88       152     2012      12        01        336              0.096542      -2.020264       0.000000       0.102706       0.086000       0.130300       0.066700   -9999.000000
53725     53725     shaanxi        107.9667       37.9667           88       152     2012      12        02        337              0.088708      -1.498932       0.000000       0.119235   -9999.000000   -9999.000000       0.070100       0.078000
53725     53725     shaanxi        107.9667       37.9667           88       152     2012      12        03        338              0.086833      -3.702515       0.000000       0.098548       0.090000       0.165100       0.068700       0.015000
53725     53725     shaanxi        107.9667       37.9667           88       152     2012      12        04        339              0.084167      -3.937683       0.000000       0.092913   -9999.000000   -9999.000000       0.066300       0.190000
53725     53725     shaanxi        107.9667       37.9667           88       152     2012      12        05        340              0.080542      -4.479828       0.000000       0.092354   -9999.000000       0.090200       0.063500       0.093000
53725     53725     shaanxi        107.9667       37.9667           88       152     2012      12        06        341              0.078875      -4.477814       0.000000       0.086918   -9999.000000   -9999.000000       0.067200   -9999.000000
53725     53725     shaanxi        107.9667       37.9667           88       152     2012      12        07        342              0.071292      -4.212036       0.000000       0.092260   -9999.000000   -9999.000000       0.068300       0.014000
53725     53725     shaanxi        107.9667       37.9667           88       152     2012      12        08        343              0.068625      -6.261719       0.000000       0.083649   -9999.000000       0.061300       0.073000       0.013000
53725     53725     shaanxi        107.9667       37.9667           88       152     2012      12        09        344              0.072500      -6.265503       0.000000       0.078030       0.094000   -9999.000000       0.066200       0.145000
53725     53725     shaanxi        107.9667       37.9667           88       152     2012      12        10        345              0.073583      -5.070221       0.000000       0.088678   -9999.000000       0.090000       0.065800       0.084000
53725     53725     shaanxi        107.9667       37.9667           88       152     2012      12        11        346              0.076083      -4.945618       0.000000       0.089804   -9999.000000   -9999.000000   -9999.000000   -9999.000000
53725     53725     shaanxi        107.9667       37.9667           88       152     2012      12        12        347              0.085417      -3.751038       0.000000       0.098528       0.089000   -9999.000000       0.069700       0.132000
53725     53725     shaanxi        107.9667       37.9667           88       152     2012      12        13        348              0.093125      -2.140442       0.000000       0.104396   -9999.000000   -9999.000000       0.069200       0.144000
53725     53725     shaanxi        107.9667       37.9667           88       152     2012      12        14        349              0.092333      -1.947052       0.000000       0.102159       0.089000   -9999.000000       0.064100       0.209000
53725     53725     shaanxi        107.9667       37.9667           88       152     2012      12        15        350              0.000000      -1.368195       0.000000       0.124327   -9999.000000       0.103200       0.068600       0.053000
53725     53725     shaanxi        107.9667       37.9667           88       152     2012      12        16        351              0.079208      -3.264740       0.000000       0.088170   -9999.000000       0.176500       0.068900   -9999.000000
53725     53725     shaanxi        107.9667       37.9667           88       152     2012      12        17        352              0.073958      -5.080017       0.000000       0.078268   -9999.000000   -9999.000000   -9999.000000       0.055000
53725     53725     shaanxi        107.9667       37.9667           88       152     2012      12        18        353              0.070292      -6.644836       0.000000       0.073736   -9999.000000       0.107700       0.066100       0.010000
53725     53725     shaanxi        107.9667       37.9667           88       152     2012      12        19        354              0.072917      -5.439850       0.000000       0.080736   -9999.000000   -9999.000000       0.062000       0.078000
53725     53725     shaanxi        107.9667       37.9667           88       152     2012      12        20        355              0.000000      -4.897919       0.288979       0.078497   -9999.000000   -9999.000000   -9999.000000       0.009000
53725     53725     shaanxi        107.9667       37.9667           88       152     2012      12        21        356              0.065833      -7.154572       0.000000       0.073937   -9999.000000   -9999.000000       0.053600   -9999.000000
53725     53725     shaanxi        107.9667       37.9667           88       152     2012      12        22        357              0.058333      -8.615112       0.000000       0.071045   -9999.000000       0.162100   -9999.000000       0.026000
53725     53725     shaanxi        107.9667       37.9667           88       152     2012      12        23        358              0.054375     -12.725403       0.000000       0.068083   -9999.000000   -9999.000000       0.061700       0.009000
53725     53725     shaanxi        107.9667       37.9667           88       152     2012      12        24        359              0.051882     -11.909698       0.000000       0.066142   -9999.000000   -9999.000000       0.065600       0.021000
53725     53725     shaanxi        107.9667       37.9667           88       152     2012      12        25        360              0.055792     -10.054352       0.000000       0.066600   -9999.000000   -9999.000000       0.070400       0.023000
53725     53725     shaanxi        107.9667       37.9667           88       152     2012      12        26        361              0.000000      -8.594025       0.000000       0.067226   -9999.000000       0.141500       0.068000       0.060000
53725     53725     shaanxi        107.9667       37.9667           88       152     2012      12        27        362              0.066182      -6.028259       0.000000       0.075958   -9999.000000   -9999.000000       0.066600       0.073000
53725     53725     shaanxi        107.9667       37.9667           88       152     2012      12        28        363              0.000000      -5.026855       0.000000       0.086650   -9999.000000   -9999.000000   -9999.000000   -9999.000000
53725     53725     shaanxi        107.9667       37.9667           88       152     2012      12        29        364              0.000000     -10.049774       0.000000       0.070607   -9999.000000   -9999.000000       0.064500       0.011000
53725     53725     shaanxi        107.9667       37.9667           88       152     2012      12        30        365              0.000000     -12.151855       0.000000       0.066277   -9999.000000   -9999.000000       0.073800   -9999.000000
53725     53725     shaanxi        107.9667       37.9667           88       152     2012      12        31        366              0.055200     -10.187836       0.000000       0.066405   -9999.000000   -9999.000000       0.066700       0.093000
