# Supplementary material for: Research on Fusing Multisatellite Soil Moisture Data Based on Bayesian Model Averaging
Source: Hindawi journal article supplement (doi:10.1155/2018/9310838), 2018-06-25
Supplement: f1 [file 9310838.f1.zip › 2012_sm00-10cm_daily_ZDB_ZHY_53735_366days_allin.txt]

53735     53735     shaanxi        108.8000       37.6167           90       155     2012      01        01        001              0.000000   -9999.000000       0.000000   -9999.000000   -9999.000000   -9999.000000       0.033900   -9999.000000
53735     53735     shaanxi        108.8000       37.6167           90       155     2012      01        02        002              0.008500      -5.959198       0.000000       0.136042   -9999.000000   -9999.000000   -9999.000000       0.202000
53735     53735     shaanxi        108.8000       37.6167           90       155     2012      01        03        003              0.000000      -9.178162       0.000000       0.125013   -9999.000000   -9999.000000       0.036100   -9999.000000
53735     53735     shaanxi        108.8000       37.6167           90       155     2012      01        04        004              0.007130     -11.666107       0.000000       0.120636   -9999.000000   -9999.000000       0.036400       0.256000
53735     53735     shaanxi        108.8000       37.6167           90       155     2012      01        05        005              0.007458      -9.940430       0.000000       0.119629   -9999.000000   -9999.000000       0.038100       0.211000
53735     53735     shaanxi        108.8000       37.6167           90       155     2012      01        06        006              0.008500      -8.675507       0.000000       0.123094   -9999.000000   -9999.000000       0.036900       0.360000
53735     53735     shaanxi        108.8000       37.6167           90       155     2012      01        07        007              0.008958      -6.258179       0.000000       0.131078   -9999.000000   -9999.000000       0.035300       0.162000
53735     53735     shaanxi        108.8000       37.6167           90       155     2012      01        08        008              0.000000      -7.223846       0.000000       0.127393   -9999.000000   -9999.000000   -9999.000000   -9999.000000
53735     53735     shaanxi        108.8000       37.6167           90       155     2012      01        09        009              0.008125      -6.992065       0.000000       0.132954   -9999.000000   -9999.000000   -9999.000000       0.279000
53735     53735     shaanxi        108.8000       37.6167           90       155     2012      01        10        010              0.007750      -7.198761       0.000000       0.132570   -9999.000000   -9999.000000       0.037400       0.180000
53735     53735     shaanxi        108.8000       37.6167           90       155     2012      01        11        011              0.007875      -8.364777       0.000000       0.125866   -9999.000000   -9999.000000       0.036700       0.270000
53735     53735     shaanxi        108.8000       37.6167           90       155     2012      01        12        012              0.007792      -7.365723       0.000000       0.127858   -9999.000000   -9999.000000       0.039200       0.111000
53735     53735     shaanxi        108.8000       37.6167           90       155     2012      01        13        013              0.007917      -7.767792       0.000000       0.127573   -9999.000000   -9999.000000       0.040600   -9999.000000
53735     53735     shaanxi        108.8000       37.6167           90       155     2012      01        14        014              0.008292      -7.111542       0.000000       0.128188   -9999.000000   -9999.000000       0.037000       0.154000
53735     53735     shaanxi        108.8000       37.6167           90       155     2012      01        15        015              0.008667      -6.949615       0.000000       0.128079   -9999.000000   -9999.000000       0.032600       0.204000
53735     53735     shaanxi        108.8000       37.6167           90       155     2012      01        16        016              0.009208      -5.014374       0.000000       0.143487   -9999.000000   -9999.000000       0.035800       0.158000
53735     53735     shaanxi        108.8000       37.6167           90       155     2012      01        17        017              0.000000      -4.797272       0.000000       0.147580   -9999.000000       0.200300       0.035200       0.101000
53735     53735     shaanxi        108.8000       37.6167           90       155     2012      01        18        018              0.009333      -4.978699       0.000000       0.144151   -9999.000000   -9999.000000       0.035800       0.150000
53735     53735     shaanxi        108.8000       37.6167           90       155     2012      01        19        019              0.009792      -3.842651       0.000000       0.154646   -9999.000000   -9999.000000   -9999.000000       0.093000
53735     53735     shaanxi        108.8000       37.6167           90       155     2012      01        20        020              0.009542      -4.289185       0.000000       0.146684   -9999.000000   -9999.000000       0.034700   -9999.000000
53735     53735     shaanxi        108.8000       37.6167           90       155     2012      01        21        021              0.008625      -8.036987       0.000000       0.128305   -9999.000000   -9999.000000       0.031300       0.056000
53735     53735     shaanxi        108.8000       37.6167           90       155     2012      01        22        022              0.007833     -12.001617       0.000000       0.122504   -9999.000000   -9999.000000       0.028500   -9999.000000
53735     53735     shaanxi        108.8000       37.6167           90       155     2012      01        23        023              0.007417     -13.370361       0.000000       0.119660   -9999.000000   -9999.000000       0.031900       0.121000
53735     53735     shaanxi        108.8000       37.6167           90       155     2012      01        24        024              0.007208     -12.961639       0.000000       0.118138   -9999.000000   -9999.000000   -9999.000000       0.090000
53735     53735     shaanxi        108.8000       37.6167           90       155     2012      01        25        025              0.007250     -12.738190       0.000000       0.118309   -9999.000000   -9999.000000   -9999.000000       0.184000
53735     53735     shaanxi        108.8000       37.6167           90       155     2012      01        26        026              0.007458     -10.366913       0.000000       0.118816   -9999.000000   -9999.000000       0.030100       0.134000
53735     53735     shaanxi        108.8000       37.6167           90       155     2012      01        27        027              0.008417      -9.100128       0.000000       0.119498   -9999.000000       0.094500       0.030700   -9999.000000
53735     53735     shaanxi        108.8000       37.6167           90       155     2012      01        28        028              0.008458      -6.965607       0.000000       0.129337   -9999.000000   -9999.000000       0.029400       0.198000
53735     53735     shaanxi        108.8000       37.6167           90       155     2012      01        29        029              0.009000      -7.195465       0.000000       0.127022   -9999.000000   -9999.000000       0.033900       0.153000
53735     53735     shaanxi        108.8000       37.6167           90       155     2012      01        30        030              0.009333      -6.326996       0.000000       0.136398   -9999.000000       0.048200   -9999.000000       0.334000
53735     53735     shaanxi        108.8000       37.6167           90       155     2012      01        31        031              0.010208      -3.118134       0.000000       0.155553   -9999.000000       0.034000       0.040300       0.192000
53735     53735     shaanxi        108.8000       37.6167           90       155     2012      02        01        032              0.008292      -2.824432       0.000000       0.177014   -9999.000000       0.069800       0.029700   -9999.000000
53735     53735     shaanxi        108.8000       37.6167           90       155     2012      02        02        033              0.007750      -8.444702       0.000000       0.125563   -9999.000000   -9999.000000       0.039500       0.214000
53735     53735     shaanxi        108.8000       37.6167           90       155     2012      02        03        034              0.008875      -7.406189       0.000000       0.125536   -9999.000000   -9999.000000       0.039800       0.154000
53735     53735     shaanxi        108.8000       37.6167           90       155     2012      02        04        035              0.010083      -4.918457       0.000000       0.143897   -9999.000000   -9999.000000       0.044300       0.341000
53735     53735     shaanxi        108.8000       37.6167           90       155     2012      02        05        036              0.010417      -2.141418       0.000000       0.174137   -9999.000000   -9999.000000   -9999.000000       0.195000
53735     53735     shaanxi        108.8000       37.6167           90       155     2012      02        06        037              0.008208      -2.560669       0.000000       0.174768   -9999.000000   -9999.000000       0.045300   -9999.000000
53735     53735     shaanxi        108.8000       37.6167           90       155     2012      02        07        038              0.007250     -10.154724       0.000000       0.124645   -9999.000000   -9999.000000       0.046400       0.165000
53735     53735     shaanxi        108.8000       37.6167           90       155     2012      02        08        039              0.007000     -10.586212       0.000000       0.119200   -9999.000000   -9999.000000       0.040200       0.196000
53735     53735     shaanxi        108.8000       37.6167           90       155     2012      02        09        040              0.007333     -10.674500       0.000000       0.119588   -9999.000000   -9999.000000       0.043800       0.181000
53735     53735     shaanxi        108.8000       37.6167           90       155     2012      02        10        041              0.008083      -9.313141       0.000000       0.120225   -9999.000000   -9999.000000       0.045400       0.089000
53735     53735     shaanxi        108.8000       37.6167           90       155     2012      02        11        042              0.009542      -6.329132       0.000000       0.134817   -9999.000000   -9999.000000   -9999.000000   -9999.000000
53735     53735     shaanxi        108.8000       37.6167           90       155     2012      02        12        043              0.010542      -2.721863       0.000000       0.164590   -9999.000000   -9999.000000   -9999.000000       0.180000
53735     53735     shaanxi        108.8000       37.6167           90       155     2012      02        13        044              0.010792      -2.970886       0.000000       0.157979   -9999.000000   -9999.000000   -9999.000000       0.182000
53735     53735     shaanxi        108.8000       37.6167           90       155     2012      02        14        045              0.010833      -2.033600       0.000000       0.175486   -9999.000000   -9999.000000   -9999.000000       0.147000
53735     53735     shaanxi        108.8000       37.6167           90       155     2012      02        15        046              0.010958      -2.385498       0.000000       0.174936   -9999.000000   -9999.000000       0.053100       0.129000
53735     53735     shaanxi        108.8000       37.6167           90       155     2012      02        16        047              0.009667      -3.704010       0.000000       0.168511   -9999.000000   -9999.000000   -9999.000000   -9999.000000
53735     53735     shaanxi        108.8000       37.6167           90       155     2012      02        17        048              0.008958      -6.315918       0.000000       0.141691   -9999.000000   -9999.000000       0.051600       0.131000
53735     53735     shaanxi        108.8000       37.6167           90       155     2012      02        18        049              0.009125      -7.371979       4.186799       0.133858       0.067000   -9999.000000       0.043600   -9999.000000
53735     53735     shaanxi        108.8000       37.6167           90       155     2012      02        19        050              0.010875      -5.653320       0.000000       0.144206       0.078000   -9999.000000       0.057200       0.170000
53735     53735     shaanxi        108.8000       37.6167           90       155     2012      02        20        051              0.013583      -1.347412       0.000000       0.179942   -9999.000000   -9999.000000       0.065300   -9999.000000
53735     53735     shaanxi        108.8000       37.6167           90       155     2012      02        21        052              0.019542       0.879395       0.000000       0.203009   -9999.000000   -9999.000000   -9999.000000       0.343000
53735     53735     shaanxi        108.8000       37.6167           90       155     2012      02        22        053              0.032292       2.992371       0.000000       0.229265       0.084000   -9999.000000   -9999.000000       0.225000
53735     53735     shaanxi        108.8000       37.6167           90       155     2012      02        23        054              0.034208       1.753754       0.000000       0.215274       0.075000       0.043400       0.060400       0.463000
53735     53735     shaanxi        108.8000       37.6167           90       155     2012      02        24        055              0.032167       1.654053       0.000000       0.220042   -9999.000000   -9999.000000       0.062500       0.142000
53735     53735     shaanxi        108.8000       37.6167           90       155     2012      02        25        056              0.015792      -1.164276       0.000000       0.187305   -9999.000000   -9999.000000       0.054800   -9999.000000
53735     53735     shaanxi        108.8000       37.6167           90       155     2012      02        26        057              0.015042      -4.125458       0.431648       0.144141   -9999.000000   -9999.000000       0.064500       0.186000
53735     53735     shaanxi        108.8000       37.6167           90       155     2012      02        27        058              0.024625      -1.145752       0.308677       0.181335       0.081000   -9999.000000   -9999.000000       0.264000
53735     53735     shaanxi        108.8000       37.6167           90       155     2012      02        28        059              0.038500       1.567596       0.000000       0.210330       0.079000       0.067100   -9999.000000       0.396000
53735     53735     shaanxi        108.8000       37.6167           90       155     2012      02        29        060              0.000000   -9999.000000       0.000000   -9999.000000       0.083000   -9999.000000   -9999.000000   -9999.000000
53735     53735     shaanxi        108.8000       37.6167           90       155     2012      03        01        061              0.064250       2.108002       0.000000       0.216893       0.078000       0.084700       0.063300   -9999.000000
53735     53735     shaanxi        108.8000       37.6167           90       155     2012      03        02        062              0.061667       2.318634       0.000000       0.224102       0.072000   -9999.000000       0.063600       0.328000
53735     53735     shaanxi        108.8000       37.6167           90       155     2012      03        03        063              0.060750       1.082520       0.000000       0.215609   -9999.000000   -9999.000000       0.082500       0.327000
53735     53735     shaanxi        108.8000       37.6167           90       155     2012      03        04        064              0.063833       0.857697       0.000000       0.212066       0.094500       0.260500   -9999.000000       0.509000
53735     53735     shaanxi        108.8000       37.6167           90       155     2012      03        05        065              0.063042       1.338867       0.053865       0.219970       0.096000   -9999.000000       0.060500       0.168000
53735     53735     shaanxi        108.8000       37.6167           90       155     2012      03        06        066              0.039417      -0.535065       0.030343       0.193894       0.085000   -9999.000000       0.049600   -9999.000000
53735     53735     shaanxi        108.8000       37.6167           90       155     2012      03        07        067              0.000000      -0.375305       0.000000       0.190635   -9999.000000   -9999.000000       0.065800       0.330000
53735     53735     shaanxi        108.8000       37.6167           90       155     2012      03        08        068              0.057583       1.432770       0.000000       0.207075   -9999.000000   -9999.000000       0.069600       0.243000
53735     53735     shaanxi        108.8000       37.6167           90       155     2012      03        09        069              0.062667       0.930847       0.000000       0.204654       0.086000       0.118800       0.075200       0.342000
53735     53735     shaanxi        108.8000       37.6167           90       155     2012      03        10        070              0.060792       1.570435       0.000000       0.211357       0.078000   -9999.000000   -9999.000000       0.099000
53735     53735     shaanxi        108.8000       37.6167           90       155     2012      03        11        071              0.058708       1.434235       0.000000       0.205238       0.078000   -9999.000000       0.059400   -9999.000000
53735     53735     shaanxi        108.8000       37.6167           90       155     2012      03        12        072              0.062708       1.979950       0.220853       0.210386   -9999.000000       0.084500       0.064600       0.176000
53735     53735     shaanxi        108.8000       37.6167           90       155     2012      03        13        073              0.061583       2.947693       0.199803       0.213678   -9999.000000   -9999.000000       0.061100       0.208000
53735     53735     shaanxi        108.8000       37.6167           90       155     2012      03        14        074              0.061667       4.042664       0.000000       0.220340       0.070000       0.144500   -9999.000000       0.295000
53735     53735     shaanxi        108.8000       37.6167           90       155     2012      03        15        075              0.061750       5.899872       0.000000       0.245108       0.085000   -9999.000000       0.072400       0.212000
53735     53735     shaanxi        108.8000       37.6167           90       155     2012      03        16        076              0.061667       4.925720       0.000000       0.246698       0.075000   -9999.000000       0.071000   -9999.000000
53735     53735     shaanxi        108.8000       37.6167           90       155     2012      03        17        077              0.061042       6.842285       0.104317       0.248589       0.069000       0.225700       0.055400       0.299000
53735     53735     shaanxi        108.8000       37.6167           90       155     2012      03        18        078              0.059667       6.629608       0.000000       0.232639   -9999.000000   -9999.000000       0.069800   -9999.000000
53735     53735     shaanxi        108.8000       37.6167           90       155     2012      03        19        079              0.059417       3.465149       0.158000       0.226738       0.075000   -9999.000000       0.070000       0.260000
53735     53735     shaanxi        108.8000       37.6167           90       155     2012      03        20        080              0.058792       4.904083       0.000000       0.229465       0.071500       0.045600       0.071800   -9999.000000
53735     53735     shaanxi        108.8000       37.6167           90       155     2012      03        21        081              0.058000       6.213654       0.000000       0.242798       0.092000   -9999.000000   -9999.000000       0.269000
53735     53735     shaanxi        108.8000       37.6167           90       155     2012      03        22        082              0.066000       2.972015       0.000000       0.236475   -9999.000000       0.210400       0.069600       0.363000
53735     53735     shaanxi        108.8000       37.6167           90       155     2012      03        23        083              0.065292       2.673126       0.204873       0.226499   -9999.000000   -9999.000000       0.061300       0.381000
53735     53735     shaanxi        108.8000       37.6167           90       155     2012      03        24        084              0.062917       3.852448       0.370800       0.216174   -9999.000000   -9999.000000       0.052900       0.226000
53735     53735     shaanxi        108.8000       37.6167           90       155     2012      03        25        085              0.000000       6.011780       0.210288       0.220756       0.072000       0.035500       0.068900   -9999.000000
53735     53735     shaanxi        108.8000       37.6167           90       155     2012      03        26        086              0.061417       6.937225       0.000000       0.224899       0.063000   -9999.000000       0.072400       0.297000
53735     53735     shaanxi        108.8000       37.6167           90       155     2012      03        27        087              0.060208       7.990997       0.000000       0.225213       0.070000   -9999.000000   -9999.000000       0.258000
53735     53735     shaanxi        108.8000       37.6167           90       155     2012      03        28        088              0.058333       9.790192       0.000000       0.230228   -9999.000000   -9999.000000       0.101600       0.400000
53735     53735     shaanxi        108.8000       37.6167           90       155     2012      03        29        089              0.057625       8.121185       0.000000       0.233782   -9999.000000   -9999.000000       0.075700       0.268000
53735     53735     shaanxi        108.8000       37.6167           90       155     2012      03        30        090              0.056333       9.258606       0.303634       0.225899       0.061000       0.187900       0.065600   -9999.000000
53735     53735     shaanxi        108.8000       37.6167           90       155     2012      03        31        091              0.055667       5.926727       0.286984       0.219214       0.065000   -9999.000000       0.072000       0.270000
53735     53735     shaanxi        108.8000       37.6167           90       155     2012      04        01        092              0.054125      10.640320       0.359257       0.221212       0.070000       0.044000       0.070300       0.206000
53735     53735     shaanxi        108.8000       37.6167           90       155     2012      04        02        093              0.052417      10.431458       0.254397       0.219073   -9999.000000   -9999.000000       0.076500       0.373000
53735     53735     shaanxi        108.8000       37.6167           90       155     2012      04        03        094              0.051625       6.102570       0.000000       0.204242   -9999.000000       0.029200       0.057300       0.111000
53735     53735     shaanxi        108.8000       37.6167           90       155     2012      04        04        095              0.050625       8.259918       0.423277       0.210879       0.070000       0.075100       0.074700   -9999.000000
53735     53735     shaanxi        108.8000       37.6167           90       155     2012      04        05        096              0.049167      10.600128       0.000000       0.208561       0.070000   -9999.000000       0.068700       0.237000
53735     53735     shaanxi        108.8000       37.6167           90       155     2012      04        06        097              0.047542       9.733185       0.713401       0.205680       0.073000   -9999.000000       0.066000       0.214000
53735     53735     shaanxi        108.8000       37.6167           90       155     2012      04        07        098              0.046167      10.315643       0.196854       0.202937       0.067000   -9999.000000   -9999.000000       0.293000
53735     53735     shaanxi        108.8000       37.6167           90       155     2012      04        08        099              0.044333      11.946533       0.000000       0.199252       0.064000   -9999.000000       0.073600       0.162000
53735     53735     shaanxi        108.8000       37.6167           90       155     2012      04        09        100              0.041667      15.030701       0.281881       0.193980       0.069000       0.110700       0.069900   -9999.000000
53735     53735     shaanxi        108.8000       37.6167           90       155     2012      04        10        101              0.039292      13.677582       0.074606       0.194634       0.069500   -9999.000000       0.090800       0.153000
53735     53735     shaanxi        108.8000       37.6167           90       155     2012      04        11        102              0.037458      12.920502       0.224189       0.195244   -9999.000000   -9999.000000       0.102600       0.338000
53735     53735     shaanxi        108.8000       37.6167           90       155     2012      04        12        103              0.042417       4.639099       1.234256       0.196614       0.082000   -9999.000000       0.081800       0.246000
53735     53735     shaanxi        108.8000       37.6167           90       155     2012      04        13        104              0.043667       8.588898       0.334268       0.219057       0.068000   -9999.000000   -9999.000000       0.170000
53735     53735     shaanxi        108.8000       37.6167           90       155     2012      04        14        105              0.041750      12.214996       0.222613       0.209634       0.062000   -9999.000000       0.067600       0.171000
53735     53735     shaanxi        108.8000       37.6167           90       155     2012      04        15        106              0.039375      13.201935       0.000000       0.204019       0.059500   -9999.000000       0.076500       0.150000
53735     53735     shaanxi        108.8000       37.6167           90       155     2012      04        16        107              0.036458      14.192444       0.000000       0.195384       0.057000   -9999.000000       0.065900   -9999.000000
53735     53735     shaanxi        108.8000       37.6167           90       155     2012      04        17        108              0.032958      15.208801       0.000000       0.188415       0.065000       0.014900       0.079600       0.246000
53735     53735     shaanxi        108.8000       37.6167           90       155     2012      04        18        109              0.030083      14.032440       0.000000       0.187370       0.062000   -9999.000000   -9999.000000   -9999.000000
53735     53735     shaanxi        108.8000       37.6167           90       155     2012      04        19        110              0.026500      16.062927       0.000000       0.183656       0.059000       0.051100       0.077800       0.263000
53735     53735     shaanxi        108.8000       37.6167           90       155     2012      04        20        111              0.023583      14.239990       0.000000       0.181482       0.056000   -9999.000000       0.057200       0.163000
53735     53735     shaanxi        108.8000       37.6167           90       155     2012      04        21        112              0.019875      15.899750       0.000000       0.178321       0.057500   -9999.000000       0.076800       0.361000
53735     53735     shaanxi        108.8000       37.6167           90       155     2012      04        22        113              0.016958      17.731598       0.000000       0.173527       0.065000       0.060800   -9999.000000       0.257000
53735     53735     shaanxi        108.8000       37.6167           90       155     2012      04        23        114              0.014375      21.530060      12.903810       0.168931       0.099000   -9999.000000       0.079600   -9999.000000
53735     53735     shaanxi        108.8000       37.6167           90       155     2012      04        24        115              0.012292      18.553284       0.000000       0.227424       0.065000   -9999.000000   -9999.000000       0.354000
53735     53735     shaanxi        108.8000       37.6167           90       155     2012      04        25        116              0.000000      12.360931       0.000000       0.263015       0.064500   -9999.000000       0.078500       0.204000
53735     53735     shaanxi        108.8000       37.6167           90       155     2012      04        26        117              0.010208      12.267761       0.000000       0.239962       0.059000   -9999.000000       0.084400       0.424000
53735     53735     shaanxi        108.8000       37.6167           90       155     2012      04        27        118              0.009458      15.806213       0.000000       0.225038       0.068000       0.161500       0.068300       0.234000
53735     53735     shaanxi        108.8000       37.6167           90       155     2012      04        28        119              0.008708      17.074860       0.000000       0.212389       0.061000   -9999.000000       0.078300   -9999.000000
53735     53735     shaanxi        108.8000       37.6167           90       155     2012      04        29        120              0.008417      19.128113       0.000000       0.202543       0.058000   -9999.000000       0.075500       0.348000
53735     53735     shaanxi        108.8000       37.6167           90       155     2012      04        30        121              0.036292      22.166595       2.735059       0.192285       0.098500       0.019000   -9999.000000       0.825000
53735     53735     shaanxi        108.8000       37.6167           90       155     2012      05        01        122              0.108250      19.673798       2.056856       0.209922       0.141000       0.392400       0.122000       0.885000
53735     53735     shaanxi        108.8000       37.6167           90       155     2012      05        02        123              0.093417      14.463043       0.000000       0.248182       0.078000       0.207400       0.109200       0.451000
53735     53735     shaanxi        108.8000       37.6167           90       155     2012      05        03        124              0.082375      18.059174       0.419618       0.230619       0.069000   -9999.000000       0.076700   -9999.000000
53735     53735     shaanxi        108.8000       37.6167           90       155     2012      05        04        125              0.072792      18.700623       0.000000       0.223666       0.067000   -9999.000000       0.072500       0.506000
53735     53735     shaanxi        108.8000       37.6167           90       155     2012      05        05        126              0.063042      20.798309       0.000000       0.209319       0.064000   -9999.000000   -9999.000000       0.376000
53735     53735     shaanxi        108.8000       37.6167           90       155     2012      05        06        127              0.054083      22.020599       1.391145       0.194731       0.073500   -9999.000000       0.097000       0.448000
53735     53735     shaanxi        108.8000       37.6167           90       155     2012      05        07        128              0.048958      20.890167       0.000000       0.200672   -9999.000000       0.074800       0.079700       0.328000
53735     53735     shaanxi        108.8000       37.6167           90       155     2012      05        08        129              0.042833      21.388092       0.324169       0.203096       0.052000   -9999.000000       0.100500   -9999.000000
53735     53735     shaanxi        108.8000       37.6167           90       155     2012      05        09        130              0.034875      23.139343       0.068006       0.193976   -9999.000000   -9999.000000       0.074500       0.330000
53735     53735     shaanxi        108.8000       37.6167           90       155     2012      05        10        131              0.033333      24.222870       5.233253       0.185571       0.110000   -9999.000000       0.078900       0.576000
53735     53735     shaanxi        108.8000       37.6167           90       155     2012      05        11        132              0.051708      23.336884       0.080129       0.209631       0.066500   -9999.000000   -9999.000000       0.340000
53735     53735     shaanxi        108.8000       37.6167           90       155     2012      05        12        133              0.043000      18.088348       0.000000       0.227002       0.061000       0.089200       0.081200       0.254000
53735     53735     shaanxi        108.8000       37.6167           90       155     2012      05        13        134              0.034375      17.433807       0.000000       0.207546       0.065000   -9999.000000       0.090500       0.259000
53735     53735     shaanxi        108.8000       37.6167           90       155     2012      05        14        135              0.027542      13.827972       0.000000       0.200550       0.070000   -9999.000000       0.076700       0.257000
53735     53735     shaanxi        108.8000       37.6167           90       155     2012      05        15        136              0.020750      16.696869       0.000000       0.190718       0.059000       0.074500       0.080000   -9999.000000
53735     53735     shaanxi        108.8000       37.6167           90       155     2012      05        16        137              0.015583      18.245270       0.000000       0.181715       0.062500       0.132100       0.082300       0.339000
53735     53735     shaanxi        108.8000       37.6167           90       155     2012      05        17        138              0.012583      18.278015       0.000000       0.175801       0.062000       0.057900   -9999.000000   -9999.000000
53735     53735     shaanxi        108.8000       37.6167           90       155     2012      05        18        139              0.011458      22.130890       2.903039       0.170975       0.068000       0.079200       0.101100       0.323000
53735     53735     shaanxi        108.8000       37.6167           90       155     2012      05        19        140              0.012750      23.243469       0.000000       0.190278       0.057000       0.266900       0.088300       0.305000
53735     53735     shaanxi        108.8000       37.6167           90       155     2012      05        20        141              0.011708      24.802185       3.096212       0.192770   -9999.000000   -9999.000000       0.082000       0.411000
53735     53735     shaanxi        108.8000       37.6167           90       155     2012      05        21        142              0.022333      23.742218       4.398504       0.193515       0.117000   -9999.000000       0.151800       0.770000
53735     53735     shaanxi        108.8000       37.6167           90       155     2012      05        22        143              0.034333      14.175507       0.000000       0.257200       0.074500       0.215900   -9999.000000   -9999.000000
53735     53735     shaanxi        108.8000       37.6167           90       155     2012      05        23        144              0.029625      17.678162       0.328447       0.232036   -9999.000000       0.164000       0.098500       0.460000
53735     53735     shaanxi        108.8000       37.6167           90       155     2012      05        24        145              0.024542      15.045502       0.000000       0.225861       0.064000       0.195200       0.079100       0.336000
53735     53735     shaanxi        108.8000       37.6167           90       155     2012      05        25        146              0.000000      18.709167       0.028941       0.214120       0.068000       0.147400       0.091200       0.490000
53735     53735     shaanxi        108.8000       37.6167           90       155     2012      05        26        147              0.015750      20.172089       0.203193       0.202557       0.068000   -9999.000000       0.076700       0.369000
53735     53735     shaanxi        108.8000       37.6167           90       155     2012      05        27        148              0.013792      22.203094       0.000000       0.190674       0.060000   -9999.000000       0.082200   -9999.000000
53735     53735     shaanxi        108.8000       37.6167           90       155     2012      05        28        149              0.012083      24.687988       7.129013       0.181104       0.066000       0.160500   -9999.000000       0.462000
53735     53735     shaanxi        108.8000       37.6167           90       155     2012      05        29        150              0.011583      20.630646       0.000000       0.224466       0.072000   -9999.000000       0.094400       0.390000
53735     53735     shaanxi        108.8000       37.6167           90       155     2012      05        30        151              0.011417      19.409760       0.000000       0.235115       0.071000       0.257500       0.089700   -9999.000000
53735     53735     shaanxi        108.8000       37.6167           90       155     2012      05        31        152              0.010958      21.181458       2.555975       0.214002       0.082000   -9999.000000       0.079100   -9999.000000
53735     53735     shaanxi        108.8000       37.6167           90       155     2012      06        01        153              0.011583      22.061493       1.855289       0.222678       0.065000   -9999.000000       0.079900   -9999.000000
53735     53735     shaanxi        108.8000       37.6167           90       155     2012      06        02        154              0.016333      23.087921      18.951674       0.227584       0.073000       0.211900       0.094400       0.455000
53735     53735     shaanxi        108.8000       37.6167           90       155     2012      06        03        155              0.028875      19.983459       0.084977       0.314070       0.063000   -9999.000000   -9999.000000       0.453000
53735     53735     shaanxi        108.8000       37.6167           90       155     2012      06        04        156              0.026042      22.062073       0.675340       0.282743       0.064000       0.212800       0.088800       0.609000
53735     53735     shaanxi        108.8000       37.6167           90       155     2012      06        05        157              0.020292      23.049835       0.384242       0.260843       0.085000       0.068700       0.126200       0.300000
53735     53735     shaanxi        108.8000       37.6167           90       155     2012      06        06        158              0.016958      21.538055       0.301828       0.249340       0.073500   -9999.000000       0.093400   -9999.000000
53735     53735     shaanxi        108.8000       37.6167           90       155     2012      06        07        159              0.016625      19.272003       2.882594       0.249523       0.065000       0.019300       0.118800       0.705000
53735     53735     shaanxi        108.8000       37.6167           90       155     2012      06        08        160              0.018875      19.553131       0.000000       0.260419       0.065000   -9999.000000   -9999.000000       0.393000
53735     53735     shaanxi        108.8000       37.6167           90       155     2012      06        09        161              0.018208      20.611115       3.696896       0.246835       0.060000       0.095400       0.091500       0.450000
53735     53735     shaanxi        108.8000       37.6167           90       155     2012      06        10        162              0.014250      23.513611      10.449821       0.227941       0.057000       0.009600       0.081200       0.289000
53735     53735     shaanxi        108.8000       37.6167           90       155     2012      06        11        163              0.000000      20.356506       0.000000       0.238975       0.056000   -9999.000000       0.103000       0.330000
53735     53735     shaanxi        108.8000       37.6167           90       155     2012      06        12        164              0.010833      20.634064       0.000000       0.271260       0.063000       0.240100       0.096300       0.367000
53735     53735     shaanxi        108.8000       37.6167           90       155     2012      06        13        165              0.009958      22.882568       0.115573       0.242118       0.066000   -9999.000000       0.094500   -9999.000000
53735     53735     shaanxi        108.8000       37.6167           90       155     2012      06        14        166              0.009333      22.742859       0.000000       0.224163       0.065000   -9999.000000   -9999.000000       0.457000
53735     53735     shaanxi        108.8000       37.6167           90       155     2012      06        15        167              0.008875      21.047791       1.530569       0.214032       0.059000       0.032700       0.094600   -9999.000000
53735     53735     shaanxi        108.8000       37.6167           90       155     2012      06        16        168              0.008708      21.846375       0.000000       0.204569       0.059000   -9999.000000       0.102800       0.380000
53735     53735     shaanxi        108.8000       37.6167           90       155     2012      06        17        169              0.008125      24.964630       0.000000       0.193976       0.059000       0.129000       0.096100       0.412000
53735     53735     shaanxi        108.8000       37.6167           90       155     2012      06        18        170              0.007292      26.806488       1.069600       0.184121       0.063500   -9999.000000       0.088800       0.489000
53735     53735     shaanxi        108.8000       37.6167           90       155     2012      06        19        171              0.007125      24.066650       3.139561       0.192520       0.072000       0.197400       0.082700       0.414000
53735     53735     shaanxi        108.8000       37.6167           90       155     2012      06        20        172              0.006958      24.021332       0.733324       0.221774       0.058000       0.131500       0.097200   -9999.000000
53735     53735     shaanxi        108.8000       37.6167           90       155     2012      06        21        173              0.006500      25.657257       2.021000       0.207582       0.079000   -9999.000000       0.080500       0.488000
53735     53735     shaanxi        108.8000       37.6167           90       155     2012      06        22        174              0.006708      24.305908       0.559308       0.215228       0.068000       0.267400       0.108200       0.459000
53735     53735     shaanxi        108.8000       37.6167           90       155     2012      06        23        175              0.006583      26.900482       2.111463       0.199206       0.079500       0.039800       0.090600       0.588000
53735     53735     shaanxi        108.8000       37.6167           90       155     2012      06        24        176              0.007292      25.469238       0.000000       0.212638       0.082000       0.364600       0.087000       0.512000
53735     53735     shaanxi        108.8000       37.6167           90       155     2012      06        25        177              0.007458      27.424683       1.390000       0.201408       0.076000       0.193100   -9999.000000   -9999.000000
53735     53735     shaanxi        108.8000       37.6167           90       155     2012      06        26        178              0.007292      26.392792       3.885938       0.199600       0.074000   -9999.000000       0.110700       0.526000
53735     53735     shaanxi        108.8000       37.6167           90       155     2012      06        27        179              0.044750      23.794037      22.072226       0.234860       0.126000       0.364800       0.169900       1.000000
53735     53735     shaanxi        108.8000       37.6167           90       155     2012      06        28        180              0.118917      19.848907      29.205816       0.314786       0.137000       0.163100       0.182800       0.793000
53735     53735     shaanxi        108.8000       37.6167           90       155     2012      06        29        181              0.110292      20.382538       0.109797       0.350114       0.119000       0.170900       0.150000   -9999.000000
53735     53735     shaanxi        108.8000       37.6167           90       155     2012      06        30        182              0.085875      22.834991       0.000000       0.328339       0.086000       0.450300       0.113700   -9999.000000
53735     53735     shaanxi        108.8000       37.6167           90       155     2012      07        01        183              0.072500      23.964050       0.000000       0.304597       0.080000   -9999.000000   -9999.000000       0.658000
53735     53735     shaanxi        108.8000       37.6167           90       155     2012      07        02        184              0.062125      24.779022       0.000000       0.291493       0.078000   -9999.000000       0.126100       0.500000
53735     53735     shaanxi        108.8000       37.6167           90       155     2012      07        03        185              0.053750      25.562378       0.810574       0.279401       0.087000       0.125600       0.158900       0.569000
53735     53735     shaanxi        108.8000       37.6167           90       155     2012      07        04        186              0.064500      23.305939       3.195387       0.278487       0.060000   -9999.000000       0.129000       0.949000
53735     53735     shaanxi        108.8000       37.6167           90       155     2012      07        05        187              0.070333      23.806610       1.685133       0.284040       0.071000       0.248900       0.127500   -9999.000000
53735     53735     shaanxi        108.8000       37.6167           90       155     2012      07        06        188              0.060083      25.447845       0.802659       0.280553   -9999.000000   -9999.000000       0.116600       0.478000
53735     53735     shaanxi        108.8000       37.6167           90       155     2012      07        07        189              0.054792      24.576660       0.454950       0.270816   -9999.000000       0.105600       0.140400       0.582000
53735     53735     shaanxi        108.8000       37.6167           90       155     2012      07        08        190              0.051500      22.991272       0.653593       0.273071       0.071000       0.130900       0.118000       0.586000
53735     53735     shaanxi        108.8000       37.6167           90       155     2012      07        09        191              0.047833      22.218475       0.037869       0.272256       0.069500   -9999.000000       0.106800       0.439000
53735     53735     shaanxi        108.8000       37.6167           90       155     2012      07        10        192              0.041375      24.546875       0.000000       0.261037       0.066000       0.127000       0.093700       0.456000
53735     53735     shaanxi        108.8000       37.6167           90       155     2012      07        11        193              0.033083      25.498657       0.000000       0.245656       0.073000   -9999.000000       0.097300       0.480000
53735     53735     shaanxi        108.8000       37.6167           90       155     2012      07        12        194              0.026000      25.492096       0.000000       0.235665       0.068000   -9999.000000   -9999.000000   -9999.000000
53735     53735     shaanxi        108.8000       37.6167           90       155     2012      07        13        195              0.021375      25.918854       0.186240       0.224462       0.071500       0.145300       0.107600       0.535000
53735     53735     shaanxi        108.8000       37.6167           90       155     2012      07        14        196              0.018167      25.745270       0.114411       0.218544       0.072000       0.118300       0.111500   -9999.000000
53735     53735     shaanxi        108.8000       37.6167           90       155     2012      07        15        197              0.016208      25.684174       0.345288       0.215041       0.058000   -9999.000000       0.095500       0.526000
53735     53735     shaanxi        108.8000       37.6167           90       155     2012      07        16        198              0.014708      26.582092       0.000000       0.212984       0.071000       0.032800       0.076500       0.471000
53735     53735     shaanxi        108.8000       37.6167           90       155     2012      07        17        199              0.013458      26.367767       0.885871       0.207678       0.073000       0.143100       0.074600       0.475000
53735     53735     shaanxi        108.8000       37.6167           90       155     2012      07        18        200              0.012292      25.962585       0.232309       0.209319       0.070000       0.117700   -9999.000000       0.516000
53735     53735     shaanxi        108.8000       37.6167           90       155     2012      07        19        201              0.011208      25.873108       8.938491       0.208041       0.067500   -9999.000000       0.072400   -9999.000000
53735     53735     shaanxi        108.8000       37.6167           90       155     2012      07        20        202              0.037391      26.008301      39.909954       0.200447       0.072000   -9999.000000       0.115900       0.462000
53735     53735     shaanxi        108.8000       37.6167           90       155     2012      07        21        203              0.138783      23.433350       7.562582       0.293072       0.158000       0.254200       0.127600       0.972000
53735     53735     shaanxi        108.8000       37.6167           90       155     2012      07        22        204              0.100417      19.965454       3.463072       0.345391       0.118000   -9999.000000       0.102200       0.849000
53735     53735     shaanxi        108.8000       37.6167           90       155     2012      07        23        205              0.081958      22.743530       0.255416       0.324644       0.110000       0.440400   -9999.000000       0.696000
53735     53735     shaanxi        108.8000       37.6167           90       155     2012      07        24        206              0.072333      23.048584      23.759996       0.307660   -9999.000000   -9999.000000       0.164700   -9999.000000
53735     53735     shaanxi        108.8000       37.6167           90       155     2012      07        25        207              0.106500      22.583649       1.978821       0.328513       0.132000       0.211100       0.132500       0.958000
53735     53735     shaanxi        108.8000       37.6167           90       155     2012      07        26        208              0.088500      24.649475       3.402562       0.341806       0.114000       0.285800       0.139800       0.938000
53735     53735     shaanxi        108.8000       37.6167           90       155     2012      07        27        209              0.102750      25.468628      19.565983       0.328566       0.108000       0.156400       0.132900       0.773000
53735     53735     shaanxi        108.8000       37.6167           90       155     2012      07        28        210              0.144958      25.156281       1.680659       0.341238       0.134000       0.415500       0.145200       0.901000
53735     53735     shaanxi        108.8000       37.6167           90       155     2012      07        29        211              0.118250      26.122986      12.363074       0.339888       0.129000       0.146800   -9999.000000   -9999.000000
53735     53735     shaanxi        108.8000       37.6167           90       155     2012      07        30        212              0.145208      26.572052       6.701851       0.339188       0.143500   -9999.000000       0.173400       1.000000
53735     53735     shaanxi        108.8000       37.6167           90       155     2012      07        31        213              0.111250      20.719666       0.229376       0.349579       0.102000       0.314400       0.147000       0.805000
53735     53735     shaanxi        108.8000       37.6167           90       155     2012      08        01        214              0.094708      23.993988       0.211190       0.328727       0.101000   -9999.000000       0.134100       0.858000
53735     53735     shaanxi        108.8000       37.6167           90       155     2012      08        02        215              0.080292      23.639954       0.000000       0.318774       0.112000       0.039800       0.124100       0.562000
53735     53735     shaanxi        108.8000       37.6167           90       155     2012      08        03        216              0.071167      25.206146       0.000000       0.308056       0.110000       0.093800       0.120200   -9999.000000
53735     53735     shaanxi        108.8000       37.6167           90       155     2012      08        04        217              0.065417      25.777374       0.000000       0.301774       0.087000   -9999.000000   -9999.000000       0.516000
53735     53735     shaanxi        108.8000       37.6167           90       155     2012      08        05        218              0.060000      25.167450       0.093490       0.294343       0.090500   -9999.000000       0.110500       0.570000
53735     53735     shaanxi        108.8000       37.6167           90       155     2012      08        06        219              0.055167      25.171356       0.000000       0.290313       0.089000   -9999.000000       0.128600       0.596000
53735     53735     shaanxi        108.8000       37.6167           90       155     2012      08        07        220              0.049167      25.675598       0.162864       0.284342       0.082000   -9999.000000       0.118100       0.406000
53735     53735     shaanxi        108.8000       37.6167           90       155     2012      08        08        221              0.042583      25.926392       0.000000       0.277054       0.089000       0.088100       0.115900       0.464000
53735     53735     shaanxi        108.8000       37.6167           90       155     2012      08        09        222              0.037125      24.840179       0.000000       0.270689       0.085500   -9999.000000   -9999.000000       0.494000
53735     53735     shaanxi        108.8000       37.6167           90       155     2012      08        10        223              0.031875      25.565460       0.000000       0.265223       0.085500       0.127300       0.116000   -9999.000000
53735     53735     shaanxi        108.8000       37.6167           90       155     2012      08        11        224              0.027667      26.254456       0.097291       0.258106       0.084000   -9999.000000       0.109600       0.559000
53735     53735     shaanxi        108.8000       37.6167           90       155     2012      08        12        225              0.025250      23.983582       0.848778       0.258987       0.089000   -9999.000000       0.124400   -9999.000000
53735     53735     shaanxi        108.8000       37.6167           90       155     2012      08        13        226              0.022917      23.956055       2.864950       0.257413   -9999.000000       0.067300       0.132900       0.466000
53735     53735     shaanxi        108.8000       37.6167           90       155     2012      08        14        227              0.021333      22.753754       0.129455       0.267815       0.109000   -9999.000000       0.129300       0.548000
53735     53735     shaanxi        108.8000       37.6167           90       155     2012      08        15        228              0.020000      22.169769       0.000000       0.269039       0.092000       0.166000   -9999.000000       0.640000
53735     53735     shaanxi        108.8000       37.6167           90       155     2012      08        16        229              0.018292      24.173920       0.909724       0.255201       0.101500       0.029400       0.147800       0.566000
53735     53735     shaanxi        108.8000       37.6167           90       155     2012      08        17        230              0.098000      25.104797      20.204090       0.254128   -9999.000000   -9999.000000       0.173200   -9999.000000
53735     53735     shaanxi        108.8000       37.6167           90       155     2012      08        18        231              0.103708      21.351929       0.296195       0.332092       0.151000       0.289600       0.168100       0.889000
53735     53735     shaanxi        108.8000       37.6167           90       155     2012      08        19        232              0.086750      20.814484       1.699043       0.306645       0.121000   -9999.000000       0.146400       0.721000
53735     53735     shaanxi        108.8000       37.6167           90       155     2012      08        20        233              0.073875      23.079346       0.152036       0.291387       0.099500       0.075400       0.137100       0.686000
53735     53735     shaanxi        108.8000       37.6167           90       155     2012      08        21        234              0.064208      21.198944       0.000000       0.280670       0.093000       0.055100       0.145100   -9999.000000
53735     53735     shaanxi        108.8000       37.6167           90       155     2012      08        22        235              0.055875      18.755981       0.000000       0.271889       0.089000   -9999.000000       0.118300   -9999.000000
53735     53735     shaanxi        108.8000       37.6167           90       155     2012      08        23        236              0.048208      20.630005       0.000000       0.265301       0.092000       0.038300       0.140700       0.564000
53735     53735     shaanxi        108.8000       37.6167           90       155     2012      08        24        237              0.041417      21.797699       0.000000       0.261345   -9999.000000   -9999.000000       0.126100   -9999.000000
53735     53735     shaanxi        108.8000       37.6167           90       155     2012      08        25        238              0.000000      22.576691       0.344081       0.255276       0.114000   -9999.000000       0.150100   -9999.000000
53735     53735     shaanxi        108.8000       37.6167           90       155     2012      08        26        239              0.029958      22.388824       0.000000       0.252310       0.099000       0.080500   -9999.000000       0.505000
53735     53735     shaanxi        108.8000       37.6167           90       155     2012      08        27        240              0.024875      22.968567       0.584409       0.247511   -9999.000000   -9999.000000       0.163600   -9999.000000
53735     53735     shaanxi        108.8000       37.6167           90       155     2012      08        28        241              0.020792      22.261078       0.000000       0.246728       0.096000       0.208900       0.134200       0.671000
53735     53735     shaanxi        108.8000       37.6167           90       155     2012      08        29        242              0.016917      22.944611       0.000000       0.237793       0.099000   -9999.000000       0.147500       0.567000
53735     53735     shaanxi        108.8000       37.6167           90       155     2012      08        30        243              0.014167      23.432281       3.893494       0.228405   -9999.000000   -9999.000000       0.136000       0.538000
53735     53735     shaanxi        108.8000       37.6167           90       155     2012      08        31        244              0.039500      23.581299      31.325480       0.234094       0.139000   -9999.000000       0.192300       0.822000
53735     53735     shaanxi        108.8000       37.6167           90       155     2012      09        01        245              0.157208      19.905029      20.457272       0.307651       0.152000   -9999.000000   -9999.000000   -9999.000000
53735     53735     shaanxi        108.8000       37.6167           90       155     2012      09        02        246              0.106375      14.057831       0.037479       0.364027       0.134000       0.209100       0.167100       0.875000
53735     53735     shaanxi        108.8000       37.6167           90       155     2012      09        03        247              0.088375      17.446106       0.000000       0.329398       0.113000   -9999.000000       0.133900       0.718000
53735     53735     shaanxi        108.8000       37.6167           90       155     2012      09        04        248              0.078708      16.975250       4.625113       0.316462       0.132000       0.179000       0.123500       0.869000
53735     53735     shaanxi        108.8000       37.6167           90       155     2012      09        05        249              0.077417      18.210541      24.185108       0.319801       0.107000       0.136100       0.138900       0.834000
53735     53735     shaanxi        108.8000       37.6167           90       155     2012      09        06        250              0.087292      20.260986       1.170638       0.336280       0.127000   -9999.000000       0.150000       0.963000
53735     53735     shaanxi        108.8000       37.6167           90       155     2012      09        07        251              0.076292      19.436798       0.000000       0.344653       0.105000   -9999.000000       0.133000       0.742000
53735     53735     shaanxi        108.8000       37.6167           90       155     2012      09        08        252              0.073333      19.102081       0.501723       0.326671       0.102000       0.142200       0.109100   -9999.000000
53735     53735     shaanxi        108.8000       37.6167           90       155     2012      09        09        253              0.071292      20.112549       0.112710       0.319744       0.112000   -9999.000000       0.142100       0.639000
53735     53735     shaanxi        108.8000       37.6167           90       155     2012      09        10        254              0.078750      20.232544       6.050473       0.311601       0.141000       0.155500       0.146900   -9999.000000
53735     53735     shaanxi        108.8000       37.6167           90       155     2012      09        11        255              0.077250      16.704803       0.445407       0.329613       0.121000   -9999.000000       0.138500       0.820000
53735     53735     shaanxi        108.8000       37.6167           90       155     2012      09        12        256              0.071583      16.078156       0.000000       0.317221       0.092000       0.157200   -9999.000000       0.623000
53735     53735     shaanxi        108.8000       37.6167           90       155     2012      09        13        257              0.066792      12.079010       0.000000       0.310694       0.092000       0.228600       0.108400       0.723000
53735     53735     shaanxi        108.8000       37.6167           90       155     2012      09        14        258              0.062208      13.922638       0.000000       0.304591       0.111000   -9999.000000       0.111600       0.545000
53735     53735     shaanxi        108.8000       37.6167           90       155     2012      09        15        259              0.057375      15.831604       0.182405       0.298961       0.101000   -9999.000000       0.129400   -9999.000000
53735     53735     shaanxi        108.8000       37.6167           90       155     2012      09        16        260              0.053292      15.519287       0.038265       0.296849       0.099000   -9999.000000       0.108100       0.597000
53735     53735     shaanxi        108.8000       37.6167           90       155     2012      09        17        261              0.064083      14.671051       5.568308       0.297103       0.108500   -9999.000000       0.129700       0.861000
53735     53735     shaanxi        108.8000       37.6167           90       155     2012      09        18        262              0.072083      15.828064       0.000000       0.312462       0.094000       0.162900   -9999.000000       0.850000
53735     53735     shaanxi        108.8000       37.6167           90       155     2012      09        19        263              0.065167      16.326202       0.000000       0.303309       0.093000   -9999.000000       0.104600       0.522000
53735     53735     shaanxi        108.8000       37.6167           90       155     2012      09        20        264              0.060417      17.529327       3.368006       0.295359       0.135000       0.164400       0.146200   -9999.000000
53735     53735     shaanxi        108.8000       37.6167           90       155     2012      09        21        265              0.062833      15.745605       0.000000       0.306401   -9999.000000       0.115200       0.113000       0.746000
53735     53735     shaanxi        108.8000       37.6167           90       155     2012      09        22        266              0.059000      15.589050       0.000000       0.300222       0.086500   -9999.000000       0.112600       0.575000
53735     53735     shaanxi        108.8000       37.6167           90       155     2012      09        23        267              0.054750      17.355316       0.000000       0.292987       0.071000       0.116100   -9999.000000       0.623000
53735     53735     shaanxi        108.8000       37.6167           90       155     2012      09        24        268              0.094333      18.058502      32.912788       0.287445       0.120000   -9999.000000       0.158300       1.000000
53735     53735     shaanxi        108.8000       37.6167           90       155     2012      09        25        269              0.137500      14.691986       5.568065       0.345732   -9999.000000       0.324100       0.128400   -9999.000000
53735     53735     shaanxi        108.8000       37.6167           90       155     2012      09        26        270              0.105750      11.664825       0.000000       0.352844       0.119000       0.090900       0.146100       0.851000
53735     53735     shaanxi        108.8000       37.6167           90       155     2012      09        27        271              0.094071      14.848328       0.065924       0.330775       0.093000   -9999.000000       0.127400       0.614000
53735     53735     shaanxi        108.8000       37.6167           90       155     2012      09        28        272              0.080000      11.793640       0.202170       0.320463       0.088000   -9999.000000       0.133500       0.689000
53735     53735     shaanxi        108.8000       37.6167           90       155     2012      09        29        273              0.076125      10.477905       0.040317       0.314840       0.096000   -9999.000000   -9999.000000       0.528000
53735     53735     shaanxi        108.8000       37.6167           90       155     2012      09        30        274              0.071500      11.304779       0.126614       0.310382       0.089000   -9999.000000       0.122200   -9999.000000
53735     53735     shaanxi        108.8000       37.6167           90       155     2012      10        01        275              0.067625      13.164185       0.000000       0.306282       0.088000   -9999.000000       0.097700       0.554000
53735     53735     shaanxi        108.8000       37.6167           90       155     2012      10        02        276              0.063500      15.815186       0.000000       0.303173       0.081000       0.114500       0.088700       0.496000
53735     53735     shaanxi        108.8000       37.6167           90       155     2012      10        03        277              0.060500      14.113434       0.230314       0.299834       0.081000       0.098400       0.093300       0.486000
53735     53735     shaanxi        108.8000       37.6167           90       155     2012      10        04        278              0.057458      15.167633       1.130909       0.297403       0.097000   -9999.000000       0.110400       0.487000
53735     53735     shaanxi        108.8000       37.6167           90       155     2012      10        05        279              0.055875      12.330231       0.000000       0.301962       0.081000       0.171400   -9999.000000       0.550000
53735     53735     shaanxi        108.8000       37.6167           90       155     2012      10        06        280              0.054167      12.391541       0.261743       0.296088       0.090000       0.155100       0.093400       0.504000
53735     53735     shaanxi        108.8000       37.6167           90       155     2012      10        07        281              0.051542      14.031769       0.000000       0.292961       0.085000   -9999.000000       0.096800   -9999.000000
53735     53735     shaanxi        108.8000       37.6167           90       155     2012      10        08        282              0.056000      11.908173       3.807384       0.293696       0.078000       0.170300       0.102900       0.898000
53735     53735     shaanxi        108.8000       37.6167           90       155     2012      10        09        283              0.065042      12.383881       0.000000       0.304255       0.092000   -9999.000000       0.111000   -9999.000000
53735     53735     shaanxi        108.8000       37.6167           90       155     2012      10        10        284              0.061292      10.542908       1.586113       0.298920       0.086000   -9999.000000   -9999.000000       0.621000
53735     53735     shaanxi        108.8000       37.6167           90       155     2012      10        11        285              0.058125      12.340851       0.000000       0.293857       0.085000       0.176600       0.087400       0.496000
53735     53735     shaanxi        108.8000       37.6167           90       155     2012      10        12        286              0.055042      12.651245       0.000000       0.289673       0.074000       0.284200       0.072400       0.631000
53735     53735     shaanxi        108.8000       37.6167           90       155     2012      10        13        287              0.052417      11.659271       0.000000       0.286259       0.075000       0.180200       0.089700       0.448000
53735     53735     shaanxi        108.8000       37.6167           90       155     2012      10        14        288              0.050375      12.264252       0.382523       0.283742       0.084000       0.078400       0.094600   -9999.000000
53735     53735     shaanxi        108.8000       37.6167           90       155     2012      10        15        289              0.065208      12.453094       4.424046       0.285270       0.085000   -9999.000000       0.111200       0.445000
53735     53735     shaanxi        108.8000       37.6167           90       155     2012      10        16        290              0.087958      10.211670       0.303523       0.299396       0.093000       0.111300   -9999.000000       0.593000
53735     53735     shaanxi        108.8000       37.6167           90       155     2012      10        17        291              0.078000       6.553375       0.756528       0.289968   -9999.000000   -9999.000000       0.096700       0.731000
53735     53735     shaanxi        108.8000       37.6167           90       155     2012      10        18        292              0.072958       7.927979       2.036768       0.294077   -9999.000000       0.105500       0.106700       0.474000
53735     53735     shaanxi        108.8000       37.6167           90       155     2012      10        19        293              0.070583       6.093475       0.000000       0.300899       0.079000       0.136900       0.090100   -9999.000000
53735     53735     shaanxi        108.8000       37.6167           90       155     2012      10        20        294              0.067208      10.532379       0.000000       0.293380       0.071000   -9999.000000       0.100000       0.531000
53735     53735     shaanxi        108.8000       37.6167           90       155     2012      10        21        295              0.066208      12.944519       1.794023       0.290523   -9999.000000       0.147300       0.134000       0.687000
53735     53735     shaanxi        108.8000       37.6167           90       155     2012      10        22        296              0.066375       5.303986       0.336462       0.296974   -9999.000000   -9999.000000       0.101500       0.736000
53735     53735     shaanxi        108.8000       37.6167           90       155     2012      10        23        297              0.063958       6.295776       0.000000       0.292671   -9999.000000   -9999.000000       0.083900       0.395000
53735     53735     shaanxi        108.8000       37.6167           90       155     2012      10        24        298              0.061417       8.039886       0.000000       0.289658   -9999.000000       0.107000       0.098300   -9999.000000
53735     53735     shaanxi        108.8000       37.6167           90       155     2012      10        25        299              0.000000       7.790985       0.288429       0.285283       0.078500   -9999.000000       0.088700       0.466000
53735     53735     shaanxi        108.8000       37.6167           90       155     2012      10        26        300              0.056625       8.997162       0.095209       0.284778       0.084000       0.084200       0.092800       0.408000
53735     53735     shaanxi        108.8000       37.6167           90       155     2012      10        27        301              0.055083       7.368378       0.000000       0.285326       0.074000   -9999.000000   -9999.000000       0.486000
53735     53735     shaanxi        108.8000       37.6167           90       155     2012      10        28        302              0.000000       8.769257       0.149101       0.283471       0.078000   -9999.000000       0.093700       0.353000
53735     53735     shaanxi        108.8000       37.6167           90       155     2012      10        29        303              0.051458      10.264801       0.065958       0.283528   -9999.000000       0.143100       0.076200   -9999.000000
53735     53735     shaanxi        108.8000       37.6167           90       155     2012      10        30        304              0.049583       5.879181       0.306299       0.264674       0.076000   -9999.000000       0.091100       0.225000
53735     53735     shaanxi        108.8000       37.6167           90       155     2012      10        31        305              0.048583       4.497620       0.299154       0.262303       0.071000       0.170800       0.080300       0.294000
53735     53735     shaanxi        108.8000       37.6167           90       155     2012      11        01        306              0.047875       4.656494       0.230658       0.261208       0.075000       0.031800       0.086700       0.327000
53735     53735     shaanxi        108.8000       37.6167           90       155     2012      11        02        307              0.057750       5.472076       0.530565       0.273298   -9999.000000       0.235800   -9999.000000       0.769000
53735     53735     shaanxi        108.8000       37.6167           90       155     2012      11        03        308              0.082125       6.984741       0.608860       0.271105   -9999.000000       0.129800       0.072600       0.599000
53735     53735     shaanxi        108.8000       37.6167           90       155     2012      11        04        309              0.074042      -0.878693       2.020465       0.208180   -9999.000000   -9999.000000       0.084700       0.375000
53735     53735     shaanxi        108.8000       37.6167           90       155     2012      11        05        310              0.072833      -1.633850       0.989857       0.182583       0.085000   -9999.000000       0.084900   -9999.000000
53735     53735     shaanxi        108.8000       37.6167           90       155     2012      11        06        311              0.081042       0.134796       0.111146       0.206009       0.092000       0.053000       0.103500       0.389000
53735     53735     shaanxi        108.8000       37.6167           90       155     2012      11        07        312              0.080750       2.162537       0.129214       0.241800   -9999.000000   -9999.000000       0.096600   -9999.000000
53735     53735     shaanxi        108.8000       37.6167           90       155     2012      11        08        313              0.077625       1.952423       0.000000       0.250672   -9999.000000       0.116400       0.098700       0.449000
53735     53735     shaanxi        108.8000       37.6167           90       155     2012      11        09        314              0.084292       4.457916       1.814501       0.278057   -9999.000000   -9999.000000       0.077400       0.765000
53735     53735     shaanxi        108.8000       37.6167           90       155     2012      11        10        315              0.087458       2.913544       0.502656       0.275738   -9999.000000       0.189400       0.083000       0.549000
53735     53735     shaanxi        108.8000       37.6167           90       155     2012      11        11        316              0.075333      -0.752899       0.056780       0.204669       0.086000       0.115800       0.084600       0.289000
53735     53735     shaanxi        108.8000       37.6167           90       155     2012      11        12        317              0.072500      -0.152954       2.770447       0.196808       0.088000       0.149000       0.088500   -9999.000000
53735     53735     shaanxi        108.8000       37.6167           90       155     2012      11        13        318              0.000000       0.395081       0.000000       0.212432   -9999.000000       0.098600   -9999.000000       0.406000
53735     53735     shaanxi        108.8000       37.6167           90       155     2012      11        14        319              0.072542       1.030884       0.056087       0.220237       0.088000   -9999.000000       0.091500       0.355000
53735     53735     shaanxi        108.8000       37.6167           90       155     2012      11        15        320              0.076583       2.662231       0.805867       0.248468   -9999.000000   -9999.000000       0.069800       0.381000
53735     53735     shaanxi        108.8000       37.6167           90       155     2012      11        16        321              0.078208      -0.808990       1.936409       0.205810       0.091000       0.053200       0.070500       0.354000
53735     53735     shaanxi        108.8000       37.6167           90       155     2012      11        17        322              0.000000      -0.271729       0.000000       0.199828       0.105000       0.152800       0.100600   -9999.000000
53735     53735     shaanxi        108.8000       37.6167           90       155     2012      11        18        323              0.090250       1.584473       0.000000       0.235929   -9999.000000       0.118400       0.093300       0.588000
53735     53735     shaanxi        108.8000       37.6167           90       155     2012      11        19        324              0.084583       1.190979       0.000000       0.228796   -9999.000000       0.068200   -9999.000000       0.415000
53735     53735     shaanxi        108.8000       37.6167           90       155     2012      11        20        325              0.089750       2.196106       0.046290       0.253817   -9999.000000   -9999.000000       0.074400       0.660000
53735     53735     shaanxi        108.8000       37.6167           90       155     2012      11        21        326              0.087042       2.161102       0.000000       0.261679       0.097000       0.187300       0.088900       0.535000
53735     53735     shaanxi        108.8000       37.6167           90       155     2012      11        22        327              0.079792       3.603271       0.000000       0.268307   -9999.000000       0.184200       0.074000   -9999.000000
53735     53735     shaanxi        108.8000       37.6167           90       155     2012      11        23        328              0.062792      -0.174652       0.000000       0.213186       0.082000   -9999.000000       0.077200       0.203000
53735     53735     shaanxi        108.8000       37.6167           90       155     2012      11        24        329              0.049250      -0.586212       0.000000       0.190539   -9999.000000       0.042900   -9999.000000       0.325000
53735     53735     shaanxi        108.8000       37.6167           90       155     2012      11        25        330              0.050625       0.788269       0.249552       0.216448   -9999.000000   -9999.000000       0.072300       0.358000
53735     53735     shaanxi        108.8000       37.6167           90       155     2012      11        26        331              0.021458      -1.497833       2.768697       0.183223       0.080000   -9999.000000   -9999.000000       0.171000
53735     53735     shaanxi        108.8000       37.6167           90       155     2012      11        27        332              0.018625      -0.100159       0.000000       0.195310       0.069000   -9999.000000       0.076300   -9999.000000
53735     53735     shaanxi        108.8000       37.6167           90       155     2012      11        28        333              0.011250      -1.089783       0.000000       0.194603   -9999.000000       0.160300       0.067300       0.089000
53735     53735     shaanxi        108.8000       37.6167           90       155     2012      11        29        334              0.011125      -3.015839       0.000000       0.159296   -9999.000000   -9999.000000       0.069000       0.188000
53735     53735     shaanxi        108.8000       37.6167           90       155     2012      11        30        335              0.011875      -2.333282       0.438353       0.177985   -9999.000000   -9999.000000   -9999.000000       0.205000
53735     53735     shaanxi        108.8000       37.6167           90       155     2012      12        01        336              0.013625      -0.703308       0.140747       0.184926       0.066000   -9999.000000       0.072200       0.077000
53735     53735     shaanxi        108.8000       37.6167           90       155     2012      12        02        337              0.012708      -0.288574       0.149969       0.193569   -9999.000000   -9999.000000       0.075500       0.119000
53735     53735     shaanxi        108.8000       37.6167           90       155     2012      12        03        338              0.010333      -1.752869       0.000000       0.183405       0.073000       0.183900       0.061800       0.121000
53735     53735     shaanxi        108.8000       37.6167           90       155     2012      12        04        339              0.011083      -2.090851       0.000000       0.168195   -9999.000000       0.135400       0.070300   -9999.000000
53735     53735     shaanxi        108.8000       37.6167           90       155     2012      12        05        340              0.009125      -2.323944       0.000000       0.176742   -9999.000000       0.140300       0.065500       0.118000
53735     53735     shaanxi        108.8000       37.6167           90       155     2012      12        06        341              0.009750      -3.394073       0.000000       0.154681   -9999.000000   -9999.000000       0.076400   -9999.000000
53735     53735     shaanxi        108.8000       37.6167           90       155     2012      12        07        342              0.008542      -2.876617       0.911291       0.166123   -9999.000000   -9999.000000       0.058500       0.127000
53735     53735     shaanxi        108.8000       37.6167           90       155     2012      12        08        343              0.007417      -4.985870       0.000000       0.148791   -9999.000000       0.105900       0.076800       0.056000
53735     53735     shaanxi        108.8000       37.6167           90       155     2012      12        09        344              0.008375      -5.773926       0.000000       0.142051       0.074000   -9999.000000       0.068200       0.333000
53735     53735     shaanxi        108.8000       37.6167           90       155     2012      12        10        345              0.008542      -3.118134       1.035498       0.160179   -9999.000000       0.109500       0.067500       0.132000
53735     53735     shaanxi        108.8000       37.6167           90       155     2012      12        11        346              0.009792      -3.577209       0.000000       0.165817   -9999.000000   -9999.000000   -9999.000000   -9999.000000
53735     53735     shaanxi        108.8000       37.6167           90       155     2012      12        12        347              0.012167      -1.185120       0.000000       0.181185       0.076000   -9999.000000       0.073500       0.184000
53735     53735     shaanxi        108.8000       37.6167           90       155     2012      12        13        348              0.014125       0.170380       0.000000       0.198422   -9999.000000   -9999.000000       0.064000       0.135000
53735     53735     shaanxi        108.8000       37.6167           90       155     2012      12        14        349              0.015667      -0.468201       0.000000       0.190476       0.081000       0.068800       0.075700       0.345000
53735     53735     shaanxi        108.8000       37.6167           90       155     2012      12        15        350              0.000000      -0.300629       0.000000       0.197967   -9999.000000   -9999.000000       0.068700       0.188000
53735     53735     shaanxi        108.8000       37.6167           90       155     2012      12        16        351              0.011667      -1.585083       0.000000       0.168216   -9999.000000       0.132400       0.071800   -9999.000000
53735     53735     shaanxi        108.8000       37.6167           90       155     2012      12        17        352              0.008958      -3.216400       0.000000       0.150466   -9999.000000   -9999.000000   -9999.000000       0.086000
53735     53735     shaanxi        108.8000       37.6167           90       155     2012      12        18        353              0.008750      -5.704987       0.000000       0.138401   -9999.000000       0.148600       0.069100       0.140000
53735     53735     shaanxi        108.8000       37.6167           90       155     2012      12        19        354              0.009417      -3.598236       0.000000       0.150201   -9999.000000   -9999.000000       0.072800       0.289000
53735     53735     shaanxi        108.8000       37.6167           90       155     2012      12        20        355              0.000000      -3.050049       0.188205       0.152177   -9999.000000   -9999.000000   -9999.000000       0.116000
53735     53735     shaanxi        108.8000       37.6167           90       155     2012      12        21        356              0.008208      -5.950928       0.000000       0.133795   -9999.000000   -9999.000000       0.061700   -9999.000000
53735     53735     shaanxi        108.8000       37.6167           90       155     2012      12        22        357              0.007000      -8.389099       0.000000       0.126010   -9999.000000       0.041500       0.059900       0.172000
53735     53735     shaanxi        108.8000       37.6167           90       155     2012      12        23        358              0.006167     -12.218414       0.000000       0.122442   -9999.000000       0.105000       0.067200       0.084000
53735     53735     shaanxi        108.8000       37.6167           90       155     2012      12        24        359              0.006056     -11.254852       0.063189       0.118975   -9999.000000   -9999.000000       0.048000       0.137000
53735     53735     shaanxi        108.8000       37.6167           90       155     2012      12        25        360              0.006583     -10.018402       0.062273       0.119622   -9999.000000   -9999.000000       0.072600       0.092000
53735     53735     shaanxi        108.8000       37.6167           90       155     2012      12        26        361              0.000000      -8.207336       0.053209       0.120262   -9999.000000       0.146400       0.068000   -9999.000000
53735     53735     shaanxi        108.8000       37.6167           90       155     2012      12        27        362              0.007545      -5.276886       0.000000       0.137614   -9999.000000   -9999.000000       0.071400       0.048000
53735     53735     shaanxi        108.8000       37.6167           90       155     2012      12        28        363              0.000000      -3.835968       0.000000       0.151684   -9999.000000   -9999.000000   -9999.000000       0.057000
53735     53735     shaanxi        108.8000       37.6167           90       155     2012      12        29        364              0.000000      -8.684814       0.000000       0.127549   -9999.000000   -9999.000000       0.070200       0.072000
53735     53735     shaanxi        108.8000       37.6167           90       155     2012      12        30        365              0.000000     -11.090057       0.000000       0.121827   -9999.000000   -9999.000000       0.079900       0.011000
53735     53735     shaanxi        108.8000       37.6167           90       155     2012      12        31        366              0.005933      -8.243896       0.000000       0.122315   -9999.000000   -9999.000000       0.074800       0.042000
