# Supplementary material for: Research on Fusing Multisatellite Soil Moisture Data Based on Bayesian Model Averaging
Source: Hindawi journal article supplement (doi:10.1155/2018/9310838), 2018-06-25
Supplement: f1 [file 9310838.f1.zip › 2012_sm00-10cm_daily_ZDB_ZHY_53740_366days_allin.txt]

53740     53740     shaanxi        109.3000       37.9333           88       157     2012      01        01        001              0.000000   -9999.000000       0.000000   -9999.000000   -9999.000000   -9999.000000       0.025500   -9999.000000
53740     53740     shaanxi        109.3000       37.9333           88       157     2012      01        02        002              0.080125      -5.896576       0.000000       0.057089   -9999.000000   -9999.000000   -9999.000000       0.206000
53740     53740     shaanxi        109.3000       37.9333           88       157     2012      01        03        003              0.000000      -8.503876       0.000000       0.049307   -9999.000000   -9999.000000       0.019500   -9999.000000
53740     53740     shaanxi        109.3000       37.9333           88       157     2012      01        04        004              0.077130     -10.845062       0.000000       0.047053   -9999.000000   -9999.000000       0.010600       0.150000
53740     53740     shaanxi        109.3000       37.9333           88       157     2012      01        05        005              0.077042     -10.638367       0.000000       0.046245   -9999.000000   -9999.000000       0.016800       0.274000
53740     53740     shaanxi        109.3000       37.9333           88       157     2012      01        06        006              0.077917      -9.404510       0.000000       0.047064   -9999.000000   -9999.000000       0.025800       0.188000
53740     53740     shaanxi        109.3000       37.9333           88       157     2012      01        07        007              0.080000      -7.095947       0.000000       0.050358   -9999.000000   -9999.000000       0.023100       0.154000
53740     53740     shaanxi        109.3000       37.9333           88       157     2012      01        08        008              0.000000      -6.371338       0.000000       0.056886   -9999.000000   -9999.000000   -9999.000000   -9999.000000
53740     53740     shaanxi        109.3000       37.9333           88       157     2012      01        09        009              0.078042      -7.398254       0.000000       0.055094   -9999.000000   -9999.000000   -9999.000000       0.193000
53740     53740     shaanxi        109.3000       37.9333           88       157     2012      01        10        010              0.077750      -7.015320       0.000000       0.056622   -9999.000000   -9999.000000       0.015200       0.215000
53740     53740     shaanxi        109.3000       37.9333           88       157     2012      01        11        011              0.077417      -7.815796       0.000000       0.053579   -9999.000000   -9999.000000       0.026000       0.205000
53740     53740     shaanxi        109.3000       37.9333           88       157     2012      01        12        012              0.077458      -8.009766       0.000000       0.051478   -9999.000000   -9999.000000       0.026700       0.118000
53740     53740     shaanxi        109.3000       37.9333           88       157     2012      01        13        013              0.077667      -7.297577       0.000000       0.054735   -9999.000000   -9999.000000       0.025900   -9999.000000
53740     53740     shaanxi        109.3000       37.9333           88       157     2012      01        14        014              0.078375      -6.875183       0.000000       0.054526   -9999.000000   -9999.000000       0.016600       0.135000
53740     53740     shaanxi        109.3000       37.9333           88       157     2012      01        15        015              0.078250      -6.676178       0.000000       0.053782   -9999.000000   -9999.000000       0.016300       0.207000
53740     53740     shaanxi        109.3000       37.9333           88       157     2012      01        16        016              0.078792      -5.517487       0.000000       0.062123   -9999.000000   -9999.000000       0.013200       0.142000
53740     53740     shaanxi        109.3000       37.9333           88       157     2012      01        17        017              0.000000      -5.163666       0.000000       0.065548   -9999.000000   -9999.000000       0.026600       0.124000
53740     53740     shaanxi        109.3000       37.9333           88       157     2012      01        18        018              0.079875      -4.978455       0.000000       0.065738   -9999.000000   -9999.000000       0.019700   -9999.000000
53740     53740     shaanxi        109.3000       37.9333           88       157     2012      01        19        019              0.081208      -4.213837       0.000000       0.068457   -9999.000000   -9999.000000   -9999.000000       0.148000
53740     53740     shaanxi        109.3000       37.9333           88       157     2012      01        20        020              0.081917      -3.400696       0.000000       0.070752   -9999.000000   -9999.000000       0.010200       0.057000
53740     53740     shaanxi        109.3000       37.9333           88       157     2012      01        21        021              0.080125      -6.774567       0.000000       0.052176   -9999.000000   -9999.000000       0.013500       0.107000
53740     53740     shaanxi        109.3000       37.9333           88       157     2012      01        22        022              0.078667     -10.418152       0.000000       0.048766   -9999.000000   -9999.000000       0.011800   -9999.000000
53740     53740     shaanxi        109.3000       37.9333           88       157     2012      01        23        023              0.078000     -12.174805       0.000000       0.047112   -9999.000000   -9999.000000       0.021000       0.066000
53740     53740     shaanxi        109.3000       37.9333           88       157     2012      01        24        024              0.077333     -11.994965       0.000000       0.046244   -9999.000000   -9999.000000   -9999.000000       0.140000
53740     53740     shaanxi        109.3000       37.9333           88       157     2012      01        25        025              0.077042     -12.005005       0.000000       0.046156   -9999.000000   -9999.000000   -9999.000000       0.111000
53740     53740     shaanxi        109.3000       37.9333           88       157     2012      01        26        026              0.077542      -9.832977       0.000000       0.047109   -9999.000000   -9999.000000       0.010200       0.141000
53740     53740     shaanxi        109.3000       37.9333           88       157     2012      01        27        027              0.078083      -7.804077       0.000000       0.053848   -9999.000000   -9999.000000       0.011900   -9999.000000
53740     53740     shaanxi        109.3000       37.9333           88       157     2012      01        28        028              0.078333      -6.184845       0.000000       0.058231   -9999.000000   -9999.000000       0.023200       0.170000
53740     53740     shaanxi        109.3000       37.9333           88       157     2012      01        29        029              0.079042      -5.781769       0.000000       0.063022   -9999.000000   -9999.000000       0.025200       0.156000
53740     53740     shaanxi        109.3000       37.9333           88       157     2012      01        30        030              0.079125      -5.851044       0.000000       0.062979   -9999.000000   -9999.000000       0.022300       0.223000
53740     53740     shaanxi        109.3000       37.9333           88       157     2012      01        31        031              0.079833      -4.037537       0.000000       0.074627   -9999.000000   -9999.000000       0.029300       0.182000
53740     53740     shaanxi        109.3000       37.9333           88       157     2012      02        01        032              0.078083      -3.365845       0.000000       0.082066   -9999.000000   -9999.000000       0.015700   -9999.000000
53740     53740     shaanxi        109.3000       37.9333           88       157     2012      02        02        033              0.077167      -8.067657       0.000000       0.053417   -9999.000000   -9999.000000       0.017600       0.129000
53740     53740     shaanxi        109.3000       37.9333           88       157     2012      02        03        034              0.078042      -8.081573       0.000000       0.051271   -9999.000000   -9999.000000       0.022400       0.190000
53740     53740     shaanxi        109.3000       37.9333           88       157     2012      02        04        035              0.080125      -5.451263       0.000000       0.062189   -9999.000000   -9999.000000       0.030700       0.194000
53740     53740     shaanxi        109.3000       37.9333           88       157     2012      02        05        036              0.080708      -2.844055       0.000000       0.079233   -9999.000000   -9999.000000   -9999.000000       0.178000
53740     53740     shaanxi        109.3000       37.9333           88       157     2012      02        06        037              0.077875      -2.430145       0.000000       0.083120   -9999.000000   -9999.000000       0.025900   -9999.000000
53740     53740     shaanxi        109.3000       37.9333           88       157     2012      02        07        038              0.076792      -9.471924       6.671382       0.049492   -9999.000000   -9999.000000       0.023300       0.136000
53740     53740     shaanxi        109.3000       37.9333           88       157     2012      02        08        039              0.076958      -9.396362       0.000000       0.047785   -9999.000000   -9999.000000       0.028000       0.113000
53740     53740     shaanxi        109.3000       37.9333           88       157     2012      02        09        040              0.077833      -9.887268       0.000000       0.046477   -9999.000000   -9999.000000       0.034800       0.074000
53740     53740     shaanxi        109.3000       37.9333           88       157     2012      02        10        041              0.077542      -8.216339       0.000000       0.048621   -9999.000000   -9999.000000       0.035700       0.074000
53740     53740     shaanxi        109.3000       37.9333           88       157     2012      02        11        042              0.079833      -6.297028       0.000000       0.060694   -9999.000000   -9999.000000   -9999.000000   -9999.000000
53740     53740     shaanxi        109.3000       37.9333           88       157     2012      02        12        043              0.083875      -2.818909       0.356824       0.075728   -9999.000000   -9999.000000   -9999.000000       0.106000
53740     53740     shaanxi        109.3000       37.9333           88       157     2012      02        13        044              0.086875      -2.132355       0.000000       0.079714       0.034000   -9999.000000   -9999.000000       0.193000
53740     53740     shaanxi        109.3000       37.9333           88       157     2012      02        14        045              0.087917      -1.161224       0.242919       0.088055       0.042000   -9999.000000   -9999.000000       0.193000
53740     53740     shaanxi        109.3000       37.9333           88       157     2012      02        15        046              0.084792      -1.404999       0.000000       0.089491   -9999.000000   -9999.000000       0.040300       0.080000
53740     53740     shaanxi        109.3000       37.9333           88       157     2012      02        16        047              0.080542      -2.980591       0.000000       0.082072   -9999.000000   -9999.000000       0.039300   -9999.000000
53740     53740     shaanxi        109.3000       37.9333           88       157     2012      02        17        048              0.079333      -5.046356       0.000000       0.070343   -9999.000000   -9999.000000       0.027300       0.155000
53740     53740     shaanxi        109.3000       37.9333           88       157     2012      02        18        049              0.078958      -5.870453       2.997653       0.065859   -9999.000000   -9999.000000       0.020600       0.090000
53740     53740     shaanxi        109.3000       37.9333           88       157     2012      02        19        050              0.080875      -5.596863       0.000000       0.069666       0.049000   -9999.000000       0.026400       0.163000
53740     53740     shaanxi        109.3000       37.9333           88       157     2012      02        20        051              0.086292      -1.656372       0.000000       0.086915   -9999.000000   -9999.000000       0.041500       0.112000
53740     53740     shaanxi        109.3000       37.9333           88       157     2012      02        21        052              0.092458       0.550049       0.000000       0.099608   -9999.000000   -9999.000000   -9999.000000       0.236000
53740     53740     shaanxi        109.3000       37.9333           88       157     2012      02        22        053              0.096667       2.864014       0.000000       0.113547       0.037000   -9999.000000   -9999.000000       0.262000
53740     53740     shaanxi        109.3000       37.9333           88       157     2012      02        23        054              0.102208       2.774841       0.000000       0.112940       0.035000   -9999.000000       0.030300       0.404000
53740     53740     shaanxi        109.3000       37.9333           88       157     2012      02        24        055              0.101250       2.535095       1.876123       0.115856       0.040000   -9999.000000       0.047100       0.162000
53740     53740     shaanxi        109.3000       37.9333           88       157     2012      02        25        056              0.092250      -0.011292       0.000000       0.098573   -9999.000000   -9999.000000       0.040000   -9999.000000
53740     53740     shaanxi        109.3000       37.9333           88       157     2012      02        26        057              0.090833      -2.899078       0.000000       0.073039   -9999.000000   -9999.000000       0.039700       0.178000
53740     53740     shaanxi        109.3000       37.9333           88       157     2012      02        27        058              0.096667      -0.207794       0.389724       0.091376       0.045000   -9999.000000   -9999.000000       0.249000
53740     53740     shaanxi        109.3000       37.9333           88       157     2012      02        28        059              0.101875       2.155029       0.462672       0.106018       0.041000       0.005400   -9999.000000       0.341000
53740     53740     shaanxi        109.3000       37.9333           88       157     2012      02        29        060              0.000000   -9999.000000       0.000000   -9999.000000       0.038000   -9999.000000   -9999.000000   -9999.000000
53740     53740     shaanxi        109.3000       37.9333           88       157     2012      03        01        061              0.110583       2.854828       0.000000       0.110983       0.035000   -9999.000000       0.039400   -9999.000000
53740     53740     shaanxi        109.3000       37.9333           88       157     2012      03        02        062              0.113125       3.222168       0.000000       0.115705   -9999.000000       0.004600       0.048700       0.268000
53740     53740     shaanxi        109.3000       37.9333           88       157     2012      03        03        063              0.115417       1.726044       0.000000       0.115347   -9999.000000   -9999.000000       0.064300       0.394000
53740     53740     shaanxi        109.3000       37.9333           88       157     2012      03        04        064              0.118083       1.177887       0.000000       0.109923   -9999.000000       0.092400       0.057600       0.502000
53740     53740     shaanxi        109.3000       37.9333           88       157     2012      03        05        065              0.118750       1.518158       2.575125       0.113933       0.044000   -9999.000000       0.036800       0.099000
53740     53740     shaanxi        109.3000       37.9333           88       157     2012      03        06        066              0.108583       0.238434       0.086555       0.099847       0.050000   -9999.000000       0.030700   -9999.000000
53740     53740     shaanxi        109.3000       37.9333           88       157     2012      03        07        067              0.000000       1.038757       0.000000       0.098757   -9999.000000   -9999.000000       0.029000       0.397000
53740     53740     shaanxi        109.3000       37.9333           88       157     2012      03        08        068              0.115583       2.341766       0.000000       0.106931   -9999.000000   -9999.000000       0.050400       0.248000
53740     53740     shaanxi        109.3000       37.9333           88       157     2012      03        09        069              0.121292       1.908966       0.000000       0.105778       0.045000       0.078600       0.051800       0.384000
53740     53740     shaanxi        109.3000       37.9333           88       157     2012      03        10        070              0.118458       3.401367       1.277054       0.112666       0.045000   -9999.000000   -9999.000000       0.091000
53740     53740     shaanxi        109.3000       37.9333           88       157     2012      03        11        071              0.116917       2.616364       0.000000       0.105049       0.031000   -9999.000000       0.026900   -9999.000000
53740     53740     shaanxi        109.3000       37.9333           88       157     2012      03        12        072              0.130208       2.437317       0.000000       0.104390   -9999.000000       0.097500       0.037200       0.160000
53740     53740     shaanxi        109.3000       37.9333           88       157     2012      03        13        073              0.131375       4.119507       0.000000       0.108151   -9999.000000   -9999.000000       0.042400       0.236000
53740     53740     shaanxi        109.3000       37.9333           88       157     2012      03        14        074              0.147250       5.064789       0.000000       0.109124       0.035000   -9999.000000   -9999.000000       0.284000
53740     53740     shaanxi        109.3000       37.9333           88       157     2012      03        15        075              0.181167       6.860443       0.549831       0.120732       0.064000   -9999.000000       0.056800       0.247000
53740     53740     shaanxi        109.3000       37.9333           88       157     2012      03        16        076              0.204958       4.476837       0.000000       0.124740       0.037000   -9999.000000   -9999.000000   -9999.000000
53740     53740     shaanxi        109.3000       37.9333           88       157     2012      03        17        077              0.205458       7.764923       0.347551       0.126854       0.036000       0.034900       0.030800       0.321000
53740     53740     shaanxi        109.3000       37.9333           88       157     2012      03        18        078              0.199000       7.429718       0.000000       0.120232   -9999.000000   -9999.000000       0.049000       0.328000
53740     53740     shaanxi        109.3000       37.9333           88       157     2012      03        19        079              0.197625       4.093719       0.225297       0.118974       0.037000   -9999.000000       0.049800       0.246000
53740     53740     shaanxi        109.3000       37.9333           88       157     2012      03        20        080              0.194625       6.384644       0.000000       0.121999       0.033500   -9999.000000       0.051100       0.148000
53740     53740     shaanxi        109.3000       37.9333           88       157     2012      03        21        081              0.193833       7.128510       1.393884       0.125089       0.040000       0.105400   -9999.000000       0.308000
53740     53740     shaanxi        109.3000       37.9333           88       157     2012      03        22        082              0.198292       3.501129       0.075398       0.121810   -9999.000000       0.018000       0.039800       0.413000
53740     53740     shaanxi        109.3000       37.9333           88       157     2012      03        23        083              0.191250       4.794586       0.289856       0.137375   -9999.000000   -9999.000000       0.034800       0.324000
53740     53740     shaanxi        109.3000       37.9333           88       157     2012      03        24        084              0.185333       5.176361       0.000000       0.120115   -9999.000000   -9999.000000       0.040500       0.188000
53740     53740     shaanxi        109.3000       37.9333           88       157     2012      03        25        085              0.000000       7.132721       0.237229       0.119144       0.033000   -9999.000000       0.049800   -9999.000000
53740     53740     shaanxi        109.3000       37.9333           88       157     2012      03        26        086              0.181417       8.197662       0.141426       0.118577       0.031000   -9999.000000       0.050900       0.186000
53740     53740     shaanxi        109.3000       37.9333           88       157     2012      03        27        087              0.181875       9.311737       0.128240       0.118272       0.037000   -9999.000000   -9999.000000       0.213000
53740     53740     shaanxi        109.3000       37.9333           88       157     2012      03        28        088              0.181750      10.549194       0.708489       0.116109   -9999.000000   -9999.000000       0.056700       0.282000
53740     53740     shaanxi        109.3000       37.9333           88       157     2012      03        29        089              0.183167       9.214966       0.162722       0.122324   -9999.000000   -9999.000000       0.043100       0.178000
53740     53740     shaanxi        109.3000       37.9333           88       157     2012      03        30        090              0.180958      10.834351       0.094292       0.121185       0.032000       0.003200       0.047800   -9999.000000
53740     53740     shaanxi        109.3000       37.9333           88       157     2012      03        31        091              0.184458       7.080841       0.740978       0.114444       0.037000   -9999.000000       0.052100       0.140000
53740     53740     shaanxi        109.3000       37.9333           88       157     2012      04        01        092              0.183875      11.098114       0.091914       0.111822       0.023000   -9999.000000       0.050300       0.185000
53740     53740     shaanxi        109.3000       37.9333           88       157     2012      04        02        093              0.180417      11.054169       0.000000       0.108636   -9999.000000   -9999.000000       0.051800       0.250000
53740     53740     shaanxi        109.3000       37.9333           88       157     2012      04        03        094              0.175917       7.383301       0.993679       0.102085   -9999.000000   -9999.000000       0.029400       0.085000
53740     53740     shaanxi        109.3000       37.9333           88       157     2012      04        04        095              0.172417       9.232300       0.000000       0.103044       0.034000   -9999.000000       0.039900   -9999.000000
53740     53740     shaanxi        109.3000       37.9333           88       157     2012      04        05        096              0.167042      11.178558       0.000000       0.100355       0.030000   -9999.000000       0.040900       0.140000
53740     53740     shaanxi        109.3000       37.9333           88       157     2012      04        06        097              0.163042      10.084503       0.000000       0.098405       0.040000   -9999.000000       0.049800       0.146000
53740     53740     shaanxi        109.3000       37.9333           88       157     2012      04        07        098              0.158583      11.752319       0.000000       0.096306       0.033000   -9999.000000   -9999.000000       0.200000
53740     53740     shaanxi        109.3000       37.9333           88       157     2012      04        08        099              0.155292      12.906250       0.000000       0.094185       0.039000   -9999.000000       0.040600       0.114000
53740     53740     shaanxi        109.3000       37.9333           88       157     2012      04        09        100              0.152083      15.378387       0.117204       0.091913       0.052500   -9999.000000       0.037600   -9999.000000
53740     53740     shaanxi        109.3000       37.9333           88       157     2012      04        10        101              0.146958      15.339111       1.431133       0.092378       0.031500   -9999.000000       0.063700       0.323000
53740     53740     shaanxi        109.3000       37.9333           88       157     2012      04        11        102              0.143375      13.716736       2.452403       0.108294   -9999.000000   -9999.000000       0.068100       0.527000
53740     53740     shaanxi        109.3000       37.9333           88       157     2012      04        12        103              0.148625       5.379761       0.737010       0.138754       0.037000   -9999.000000       0.055000       0.556000
53740     53740     shaanxi        109.3000       37.9333           88       157     2012      04        13        104              0.149542      10.321930       1.879842       0.148407   -9999.000000   -9999.000000   -9999.000000       0.043000
53740     53740     shaanxi        109.3000       37.9333           88       157     2012      04        14        105              0.147208      13.411438       0.967964       0.144680       0.026000   -9999.000000       0.048400   -9999.000000
53740     53740     shaanxi        109.3000       37.9333           88       157     2012      04        15        106              0.143750      14.464294       0.000000       0.150618       0.032000   -9999.000000       0.035800       0.146000
53740     53740     shaanxi        109.3000       37.9333           88       157     2012      04        16        107              0.139958      15.975830       0.000000       0.134747       0.031000   -9999.000000       0.048100       0.162000
53740     53740     shaanxi        109.3000       37.9333           88       157     2012      04        17        108              0.135208      15.994781       0.000000       0.122600       0.040000       0.043400       0.051900       0.155000
53740     53740     shaanxi        109.3000       37.9333           88       157     2012      04        18        109              0.132042      15.971893       5.805590       0.115892       0.029000   -9999.000000   -9999.000000       0.110000
53740     53740     shaanxi        109.3000       37.9333           88       157     2012      04        19        110              0.126917      15.600586       0.000000       0.160808       0.033000   -9999.000000       0.044800       0.085000
53740     53740     shaanxi        109.3000       37.9333           88       157     2012      04        20        111              0.123625      15.432220       0.241741       0.151856       0.027500   -9999.000000       0.028000       0.143000
53740     53740     shaanxi        109.3000       37.9333           88       157     2012      04        21        112              0.118167      16.863312       0.453951       0.139988       0.034500   -9999.000000       0.040000       0.273000
53740     53740     shaanxi        109.3000       37.9333           88       157     2012      04        22        113              0.112750      18.123596       0.000000       0.128451       0.041000       0.008900   -9999.000000       0.209000
53740     53740     shaanxi        109.3000       37.9333           88       157     2012      04        23        114              0.143250      21.685150      24.356642       0.116546       0.037500   -9999.000000       0.068200   -9999.000000
53740     53740     shaanxi        109.3000       37.9333           88       157     2012      04        24        115              0.162250      20.179321       0.000000       0.200618       0.036000   -9999.000000   -9999.000000       0.421000
53740     53740     shaanxi        109.3000       37.9333           88       157     2012      04        25        116              0.000000      14.096191       0.000000       0.218314       0.036500       0.051000       0.044900       0.150000
53740     53740     shaanxi        109.3000       37.9333           88       157     2012      04        26        117              0.147708      12.893860       0.000000       0.193034       0.032500   -9999.000000       0.033500       0.345000
53740     53740     shaanxi        109.3000       37.9333           88       157     2012      04        27        118              0.140125      17.000122       0.000000       0.178411       0.037000   -9999.000000       0.047400       0.232000
53740     53740     shaanxi        109.3000       37.9333           88       157     2012      04        28        119              0.131792      17.907013       0.000000       0.167002       0.041000   -9999.000000       0.055300   -9999.000000
53740     53740     shaanxi        109.3000       37.9333           88       157     2012      04        29        120              0.123125      20.081482       0.000000       0.156775       0.030000   -9999.000000       0.047600       0.162000
53740     53740     shaanxi        109.3000       37.9333           88       157     2012      04        30        121              0.172042      23.380524      14.575291       0.146527       0.042000   -9999.000000   -9999.000000       0.973000
53740     53740     shaanxi        109.3000       37.9333           88       157     2012      05        01        122              0.244958      20.831665       2.013489       0.200302       0.062500   -9999.000000       0.085300       0.869000
53740     53740     shaanxi        109.3000       37.9333           88       157     2012      05        02        123              0.233417      15.437347       0.000000       0.221853       0.038000       0.113000       0.072500       0.457000
53740     53740     shaanxi        109.3000       37.9333           88       157     2012      05        03        124              0.219083      19.551422       0.053478       0.199611       0.031000   -9999.000000       0.069400   -9999.000000
53740     53740     shaanxi        109.3000       37.9333           88       157     2012      05        04        125              0.206458      20.527161       0.640962       0.187422       0.035000   -9999.000000       0.060700       0.450000
53740     53740     shaanxi        109.3000       37.9333           88       157     2012      05        05        126              0.193708      22.385620       1.260663       0.174859       0.029000   -9999.000000       0.055000       0.307000
53740     53740     shaanxi        109.3000       37.9333           88       157     2012      05        06        127              0.181667      22.670990       0.111729       0.172865       0.029000   -9999.000000       0.056600       0.362000
53740     53740     shaanxi        109.3000       37.9333           88       157     2012      05        07        128              0.172042      23.576416       0.090828       0.160285   -9999.000000   -9999.000000       0.046200       0.339000
53740     53740     shaanxi        109.3000       37.9333           88       157     2012      05        08        129              0.161667      23.761230       0.671217       0.153877       0.029000   -9999.000000       0.069200   -9999.000000
53740     53740     shaanxi        109.3000       37.9333           88       157     2012      05        09        130              0.146958      25.027527       1.086910       0.151306   -9999.000000   -9999.000000       0.055200       0.778000
53740     53740     shaanxi        109.3000       37.9333           88       157     2012      05        10        131              0.132083      25.138885       3.482357       0.152227       0.034000   -9999.000000       0.061100       0.509000
53740     53740     shaanxi        109.3000       37.9333           88       157     2012      05        11        132              0.120542      24.656372       0.000000       0.165331       0.037500   -9999.000000   -9999.000000       0.499000
53740     53740     shaanxi        109.3000       37.9333           88       157     2012      05        12        133              0.110458      20.199249       0.000000       0.167418       0.032500   -9999.000000       0.044200       0.156000
53740     53740     shaanxi        109.3000       37.9333           88       157     2012      05        13        134              0.101667      18.452911       0.000000       0.151073       0.034000       0.070700       0.051400   -9999.000000
53740     53740     shaanxi        109.3000       37.9333           88       157     2012      05        14        135              0.098167      15.623962       0.000000       0.144772       0.026000   -9999.000000       0.049500       0.262000
53740     53740     shaanxi        109.3000       37.9333           88       157     2012      05        15        136              0.093542      17.663116       0.000000       0.135937       0.017000   -9999.000000       0.060800       0.196000
53740     53740     shaanxi        109.3000       37.9333           88       157     2012      05        16        137              0.088458      19.219360       0.000000       0.127162       0.031000   -9999.000000       0.056800       0.154000
53740     53740     shaanxi        109.3000       37.9333           88       157     2012      05        17        138              0.084875      19.297760       0.000000       0.119926       0.032000   -9999.000000   -9999.000000       0.157000
53740     53740     shaanxi        109.3000       37.9333           88       157     2012      05        18        139              0.080500      22.559509       2.648336       0.113152       0.036000   -9999.000000       0.051800       0.191000
53740     53740     shaanxi        109.3000       37.9333           88       157     2012      05        19        140              0.080833      23.912537       0.000000       0.129746       0.025000   -9999.000000       0.051800       0.322000
53740     53740     shaanxi        109.3000       37.9333           88       157     2012      05        20        141              0.080250      25.363922       5.639348       0.132392   -9999.000000   -9999.000000       0.049500       0.246000
53740     53740     shaanxi        109.3000       37.9333           88       157     2012      05        21        142              0.132292      24.872253       9.016735       0.139449       0.071000   -9999.000000       0.105800       0.656000
53740     53740     shaanxi        109.3000       37.9333           88       157     2012      05        22        143              0.158875      16.016022       0.000000       0.221784       0.041500   -9999.000000       0.063200   -9999.000000
53740     53740     shaanxi        109.3000       37.9333           88       157     2012      05        23        144              0.142333      19.191010       0.307387       0.190158   -9999.000000       0.095900       0.058100       0.477000
53740     53740     shaanxi        109.3000       37.9333           88       157     2012      05        24        145              0.127958      17.512848       0.165926       0.178752       0.033000   -9999.000000       0.045000       0.224000
53740     53740     shaanxi        109.3000       37.9333           88       157     2012      05        25        146              0.000000      20.444458       0.775310       0.166790       0.040000   -9999.000000       0.055000       0.264000
53740     53740     shaanxi        109.3000       37.9333           88       157     2012      05        26        147              0.099792      21.696381       0.614570       0.159368       0.043000   -9999.000000       0.056000       0.293000
53740     53740     shaanxi        109.3000       37.9333           88       157     2012      05        27        148              0.092250      23.394287       0.000000       0.150321       0.035000   -9999.000000       0.059800   -9999.000000
53740     53740     shaanxi        109.3000       37.9333           88       157     2012      05        28        149              0.085333      25.046082      10.990161       0.141629       0.041000       0.065100   -9999.000000       0.376000
53740     53740     shaanxi        109.3000       37.9333           88       157     2012      05        29        150              0.082292      22.194458       0.000000       0.184545       0.029000   -9999.000000       0.051100       0.312000
53740     53740     shaanxi        109.3000       37.9333           88       157     2012      05        30        151              0.081500      20.288422       0.000000       0.188880       0.032000       0.112500       0.053000   -9999.000000
53740     53740     shaanxi        109.3000       37.9333           88       157     2012      05        31        152              0.077292      21.190277       7.360872       0.168818       0.035000   -9999.000000       0.051800   -9999.000000
53740     53740     shaanxi        109.3000       37.9333           88       157     2012      06        01        153              0.077000      22.378235       0.575113       0.200448       0.030500   -9999.000000       0.057500   -9999.000000
53740     53740     shaanxi        109.3000       37.9333           88       157     2012      06        02        154              0.078333      23.315033      11.452791       0.188922       0.040000       0.118900       0.063300       0.320000
53740     53740     shaanxi        109.3000       37.9333           88       157     2012      06        03        155              0.112292      20.771790       0.254098       0.221134       0.044000   -9999.000000   -9999.000000       0.463000
53740     53740     shaanxi        109.3000       37.9333           88       157     2012      06        04        156              0.108583      23.041473       0.526781       0.209045       0.040000   -9999.000000       0.046700       0.411000
53740     53740     shaanxi        109.3000       37.9333           88       157     2012      06        05        157              0.098042      24.745178       0.216276       0.189438       0.038000   -9999.000000       0.070300       0.310000
53740     53740     shaanxi        109.3000       37.9333           88       157     2012      06        06        158              0.091042      23.681641       0.069854       0.179071       0.037000   -9999.000000       0.056800   -9999.000000
53740     53740     shaanxi        109.3000       37.9333           88       157     2012      06        07        159              0.089750      21.207062       2.879171       0.174590       0.042500   -9999.000000       0.093400       0.703000
53740     53740     shaanxi        109.3000       37.9333           88       157     2012      06        08        160              0.090375      21.269684       1.313764       0.187747       0.026000   -9999.000000       0.056700       0.331000
53740     53740     shaanxi        109.3000       37.9333           88       157     2012      06        09        161              0.090750      22.785706       0.000000       0.174697       0.034000   -9999.000000       0.055700       0.394000
53740     53740     shaanxi        109.3000       37.9333           88       157     2012      06        10        162              0.085875      25.273712       0.106885       0.157715       0.027000       0.039300       0.053700       0.226000
53740     53740     shaanxi        109.3000       37.9333           88       157     2012      06        11        163              0.000000      21.929474       0.791275       0.146063       0.035000   -9999.000000       0.059100   -9999.000000
53740     53740     shaanxi        109.3000       37.9333           88       157     2012      06        12        164              0.077917      23.219177       0.000000       0.136611       0.031500   -9999.000000       0.055500       0.319000
53740     53740     shaanxi        109.3000       37.9333           88       157     2012      06        13        165              0.073625      25.064178       0.000000       0.126684       0.040000   -9999.000000       0.062400       0.314000
53740     53740     shaanxi        109.3000       37.9333           88       157     2012      06        14        166              0.070375      24.082001       0.000000       0.119358       0.036000   -9999.000000   -9999.000000       0.309000
53740     53740     shaanxi        109.3000       37.9333           88       157     2012      06        15        167              0.067292      23.400696       0.138648       0.114893       0.022000       0.081700       0.043500       0.200000
53740     53740     shaanxi        109.3000       37.9333           88       157     2012      06        16        168              0.065333      24.026489       0.000000       0.110177       0.035000   -9999.000000       0.052500       0.210000
53740     53740     shaanxi        109.3000       37.9333           88       157     2012      06        17        169              0.062750      25.969360       0.000000       0.104601       0.027500   -9999.000000       0.062000       0.357000
53740     53740     shaanxi        109.3000       37.9333           88       157     2012      06        18        170              0.059792      27.559906       0.154977       0.099368       0.036500   -9999.000000       0.060200       0.344000
53740     53740     shaanxi        109.3000       37.9333           88       157     2012      06        19        171              0.057833      27.337219       0.131179       0.096622       0.028000   -9999.000000       0.057100       0.374000
53740     53740     shaanxi        109.3000       37.9333           88       157     2012      06        20        172              0.057625      26.373962       6.679873       0.096657   -9999.000000       0.209400   -9999.000000   -9999.000000
53740     53740     shaanxi        109.3000       37.9333           88       157     2012      06        21        173              0.057042      27.051483       0.348120       0.133752       0.027000   -9999.000000       0.043300       0.741000
53740     53740     shaanxi        109.3000       37.9333           88       157     2012      06        22        174              0.057000      26.051086       3.888131       0.163340       0.043000   -9999.000000       0.069600       0.768000
53740     53740     shaanxi        109.3000       37.9333           88       157     2012      06        23        175              0.057167      27.433289       3.172059       0.168440       0.049000   -9999.000000       0.051300       0.438000
53740     53740     shaanxi        109.3000       37.9333           88       157     2012      06        24        176              0.060083      26.743469       0.809693       0.180547       0.041000   -9999.000000       0.068900       0.357000
53740     53740     shaanxi        109.3000       37.9333           88       157     2012      06        25        177              0.060500      27.504242       0.774400       0.167782       0.049000       0.033600   -9999.000000   -9999.000000
53740     53740     shaanxi        109.3000       37.9333           88       157     2012      06        26        178              0.058125      27.816498       0.000000       0.153341       0.036000   -9999.000000       0.054500       0.366000
53740     53740     shaanxi        109.3000       37.9333           88       157     2012      06        27        179              0.159958      25.949554      35.148769       0.142992       0.074000   -9999.000000       0.085900       0.987000
53740     53740     shaanxi        109.3000       37.9333           88       157     2012      06        28        180              0.231875      22.210144      29.093569       0.247330       0.069000       0.126500       0.101100       0.625000
53740     53740     shaanxi        109.3000       37.9333           88       157     2012      06        29        181              0.241375      22.571686       0.073743       0.269101       0.056000   -9999.000000       0.092900   -9999.000000
53740     53740     shaanxi        109.3000       37.9333           88       157     2012      06        30        182              0.220417      24.930756       1.547880       0.237336       0.044000       0.074300       0.071500   -9999.000000
53740     53740     shaanxi        109.3000       37.9333           88       157     2012      07        01        183              0.199917      26.605652       0.000000       0.221323       0.047000   -9999.000000   -9999.000000       0.507000
53740     53740     shaanxi        109.3000       37.9333           88       157     2012      07        02        184              0.180417      27.295410       0.000000       0.204232       0.031000   -9999.000000       0.055100       0.585000
53740     53740     shaanxi        109.3000       37.9333           88       157     2012      07        03        185              0.164500      28.877411       5.629191       0.190821       0.032000       0.141400       0.063400       0.474000
53740     53740     shaanxi        109.3000       37.9333           88       157     2012      07        04        186              0.158208      25.209839       0.791356       0.214327       0.031000   -9999.000000       0.046600       0.590000
53740     53740     shaanxi        109.3000       37.9333           88       157     2012      07        05        187              0.143208      26.682190       0.214848       0.202992       0.030000   -9999.000000       0.065700   -9999.000000
53740     53740     shaanxi        109.3000       37.9333           88       157     2012      07        06        188              0.135583      28.345764       0.120086       0.189031   -9999.000000   -9999.000000       0.063400       0.215000
53740     53740     shaanxi        109.3000       37.9333           88       157     2012      07        07        189              0.129625      27.830078       0.140946       0.179721   -9999.000000   -9999.000000       0.054100       0.458000
53740     53740     shaanxi        109.3000       37.9333           88       157     2012      07        08        190              0.126292      25.603577       2.166413       0.178724       0.031000       0.166800       0.053500       0.330000
53740     53740     shaanxi        109.3000       37.9333           88       157     2012      07        09        191              0.125208      25.070343       0.278477       0.192167       0.038000   -9999.000000       0.051800       0.274000
53740     53740     shaanxi        109.3000       37.9333           88       157     2012      07        10        192              0.121750      27.174927       0.000000       0.178123       0.035000   -9999.000000       0.052100   -9999.000000
53740     53740     shaanxi        109.3000       37.9333           88       157     2012      07        11        193              0.114042      28.153015       0.531442       0.162670       0.037000       0.115600       0.061600       0.368000
53740     53740     shaanxi        109.3000       37.9333           88       157     2012      07        12        194              0.106292      27.982025       0.000000       0.155235       0.040000   -9999.000000   -9999.000000       0.414000
53740     53740     shaanxi        109.3000       37.9333           88       157     2012      07        13        195              0.098542      28.236237       0.239159       0.145910       0.026000   -9999.000000       0.054000       0.457000
53740     53740     shaanxi        109.3000       37.9333           88       157     2012      07        14        196              0.093458      28.527893      33.871799       0.137362       0.038000   -9999.000000       0.061400       0.789000
53740     53740     shaanxi        109.3000       37.9333           88       157     2012      07        15        197              0.095208      26.416077       0.000000       0.250148       0.032000   -9999.000000       0.051800       0.743000
53740     53740     shaanxi        109.3000       37.9333           88       157     2012      07        16        198              0.096167      26.557159       0.776106       0.216189       0.030000       0.038600       0.056400       0.445000
53740     53740     shaanxi        109.3000       37.9333           88       157     2012      07        17        199              0.093583      27.231171       1.055530       0.197265       0.034000   -9999.000000       0.049400       0.316000
53740     53740     shaanxi        109.3000       37.9333           88       157     2012      07        18        200              0.089958      26.369965       0.961506       0.192567       0.036000   -9999.000000   -9999.000000       0.369000
53740     53740     shaanxi        109.3000       37.9333           88       157     2012      07        19        201              0.086875      26.559052       0.402683       0.183978       0.026500   -9999.000000       0.034600   -9999.000000
53740     53740     shaanxi        109.3000       37.9333           88       157     2012      07        20        202              0.108913      27.930054      37.675957       0.173683       0.028000   -9999.000000       0.056200       0.343000
53740     53740     shaanxi        109.3000       37.9333           88       157     2012      07        21        203              0.244826      26.044098       7.968497       0.223865       0.064000       0.480100       0.101200       0.845000
53740     53740     shaanxi        109.3000       37.9333           88       157     2012      07        22        204              0.222917      22.843750       0.000000       0.254373       0.042500   -9999.000000       0.071900       0.748000
53740     53740     shaanxi        109.3000       37.9333           88       157     2012      07        23        205              0.206667      25.333374       0.039029       0.221130       0.036000       0.287300       0.064900       0.538000
53740     53740     shaanxi        109.3000       37.9333           88       157     2012      07        24        206              0.199375      25.386047      19.773315       0.209420       0.046500   -9999.000000       0.083400   -9999.000000
53740     53740     shaanxi        109.3000       37.9333           88       157     2012      07        25        207              0.216125      24.749329       0.664176       0.227354       0.044500   -9999.000000       0.057600       0.942000
53740     53740     shaanxi        109.3000       37.9333           88       157     2012      07        26        208              0.202000      27.487457       5.360125       0.241366   -9999.000000       0.092700       0.060600       0.656000
53740     53740     shaanxi        109.3000       37.9333           88       157     2012      07        27        209              0.233000      28.114563      65.909851       0.235224       0.050000   -9999.000000       0.088400       0.757000
53740     53740     shaanxi        109.3000       37.9333           88       157     2012      07        28        210              0.265458      25.440765       0.867269       0.309788       0.058000       0.186200       0.081800       0.796000
53740     53740     shaanxi        109.3000       37.9333           88       157     2012      07        29        211              0.233833      27.588287      15.324799       0.255443       0.055000       0.163300   -9999.000000   -9999.000000
53740     53740     shaanxi        109.3000       37.9333           88       157     2012      07        30        212              0.272792      28.166412      31.078381       0.236389       0.063000       0.182900       0.093600       1.000000
53740     53740     shaanxi        109.3000       37.9333           88       157     2012      07        31        213              0.245000      21.618347       0.730390       0.275436       0.042000       0.171600       0.071300       0.755000
53740     53740     shaanxi        109.3000       37.9333           88       157     2012      08        01        214              0.223000      26.238373       0.855620       0.237687       0.041000   -9999.000000       0.076800       0.605000
53740     53740     shaanxi        109.3000       37.9333           88       157     2012      08        02        215              0.201875      27.301453       0.712193       0.222374       0.038000   -9999.000000       0.058600       0.461000
53740     53740     shaanxi        109.3000       37.9333           88       157     2012      08        03        216              0.182750      27.888794       0.000000       0.209871       0.046000       0.041000       0.064100   -9999.000000
53740     53740     shaanxi        109.3000       37.9333           88       157     2012      08        04        217              0.163958      27.968872       0.000000       0.200589       0.033500   -9999.000000   -9999.000000       0.359000
53740     53740     shaanxi        109.3000       37.9333           88       157     2012      08        05        218              0.143792      28.061249       0.000000       0.192409       0.029000   -9999.000000       0.041700       0.555000
53740     53740     shaanxi        109.3000       37.9333           88       157     2012      08        06        219              0.123542      28.167664       0.344950       0.186516       0.036000   -9999.000000       0.054800       0.403000
53740     53740     shaanxi        109.3000       37.9333           88       157     2012      08        07        220              0.108833      28.636963       0.123740       0.182474       0.029000   -9999.000000       0.055500       0.210000
53740     53740     shaanxi        109.3000       37.9333           88       157     2012      08        08        221              0.097917      29.017548       0.000000       0.175408       0.050000       0.124700       0.057700   -9999.000000
53740     53740     shaanxi        109.3000       37.9333           88       157     2012      08        09        222              0.090708      27.575928       0.000000       0.166821       0.033000   -9999.000000       0.066300       0.360000
53740     53740     shaanxi        109.3000       37.9333           88       157     2012      08        10        223              0.085500      27.919983       0.000000       0.159924       0.041000       0.051800       0.044200       0.537000
53740     53740     shaanxi        109.3000       37.9333           88       157     2012      08        11        224              0.078958      27.832214       0.242701       0.153909       0.026000   -9999.000000       0.047000       0.519000
53740     53740     shaanxi        109.3000       37.9333           88       157     2012      08        12        225              0.076917      25.016388       0.000000       0.157061       0.037000       0.171300       0.048000       0.280000
53740     53740     shaanxi        109.3000       37.9333           88       157     2012      08        13        226              0.073792      26.466156       5.506088       0.152692       0.062000       0.033200       0.069700       0.320000
53740     53740     shaanxi        109.3000       37.9333           88       157     2012      08        14        227              0.074083      25.535736       2.391950       0.164069       0.034000   -9999.000000       0.072700       0.460000
53740     53740     shaanxi        109.3000       37.9333           88       157     2012      08        15        228              0.077750      24.492340       1.058366       0.201514       0.032000   -9999.000000   -9999.000000       0.497000
53740     53740     shaanxi        109.3000       37.9333           88       157     2012      08        16        229              0.079083      25.606659       5.024690       0.186619       0.042500       0.160700       0.082400       0.466000
53740     53740     shaanxi        109.3000       37.9333           88       157     2012      08        17        230              0.128625      27.320099      12.145856       0.192333       0.042000   -9999.000000       0.088900   -9999.000000
53740     53740     shaanxi        109.3000       37.9333           88       157     2012      08        18        231              0.149708      23.865265       0.365030       0.243320       0.037500       0.112400       0.091400       0.846000
53740     53740     shaanxi        109.3000       37.9333           88       157     2012      08        19        232              0.134417      24.059845       0.000000       0.214495       0.051000   -9999.000000       0.064200       0.564000
53740     53740     shaanxi        109.3000       37.9333           88       157     2012      08        20        233              0.113125      25.841125       0.000000       0.198995       0.034500   -9999.000000       0.071000       0.501000
53740     53740     shaanxi        109.3000       37.9333           88       157     2012      08        21        234              0.095875      23.826080       0.000000       0.187164       0.033000       0.061500       0.071000   -9999.000000
53740     53740     shaanxi        109.3000       37.9333           88       157     2012      08        22        235              0.088042      21.180115       0.000000       0.178212       0.025000   -9999.000000       0.054400   -9999.000000
53740     53740     shaanxi        109.3000       37.9333           88       157     2012      08        23        236              0.082667      22.680328       0.000000       0.172078       0.031000   -9999.000000       0.060400       0.434000
53740     53740     shaanxi        109.3000       37.9333           88       157     2012      08        24        237              0.078917      23.589691       0.000000       0.167573   -9999.000000   -9999.000000       0.070600   -9999.000000
53740     53740     shaanxi        109.3000       37.9333           88       157     2012      08        25        238              0.000000      24.808228      10.565630       0.161884   -9999.000000   -9999.000000       0.068900   -9999.000000
53740     53740     shaanxi        109.3000       37.9333           88       157     2012      08        26        239              0.098708      25.147369       0.000000       0.191803       0.036000       0.245500   -9999.000000       0.526000
53740     53740     shaanxi        109.3000       37.9333           88       157     2012      08        27        240              0.097833      25.007965       0.405003       0.204223       0.038000   -9999.000000       0.063700   -9999.000000
53740     53740     shaanxi        109.3000       37.9333           88       157     2012      08        28        241              0.092125      24.502808       0.000000       0.189765       0.029000       0.288900       0.041600       0.606000
53740     53740     shaanxi        109.3000       37.9333           88       157     2012      08        29        242              0.085792      25.441620       0.000000       0.178473       0.045000   -9999.000000       0.054000       0.524000
53740     53740     shaanxi        109.3000       37.9333           88       157     2012      08        30        243              0.080792      25.626648       3.442492       0.168384       0.043000       0.058800       0.064300       0.434000
53740     53740     shaanxi        109.3000       37.9333           88       157     2012      08        31        244              0.101500      25.605225      27.636112       0.170949       0.064000       0.107600       0.092900       0.687000
53740     53740     shaanxi        109.3000       37.9333           88       157     2012      09        01        245              0.241250      22.120819      26.003088       0.231220       0.063000   -9999.000000   -9999.000000   -9999.000000
53740     53740     shaanxi        109.3000       37.9333           88       157     2012      09        02        246              0.231417      16.050659       0.339297       0.271887       0.054000       0.105700       0.064800       0.684000
53740     53740     shaanxi        109.3000       37.9333           88       157     2012      09        03        247              0.217250      20.067719       0.000000       0.231055       0.038000       0.252700       0.067800       0.592000
53740     53740     shaanxi        109.3000       37.9333           88       157     2012      09        04        248              0.205000      19.239319       2.863041       0.217336       0.059000       0.194700       0.062300       0.487000
53740     53740     shaanxi        109.3000       37.9333           88       157     2012      09        05        249              0.196542      20.274261       1.371921       0.216642       0.041000       0.123900       0.068800       0.480000
53740     53740     shaanxi        109.3000       37.9333           88       157     2012      09        06        250              0.201375      21.626862       0.301492       0.214924       0.045000   -9999.000000       0.067900   -9999.000000
53740     53740     shaanxi        109.3000       37.9333           88       157     2012      09        07        251              0.191750      21.935028       0.000000       0.208797       0.044000   -9999.000000       0.049400       0.534000
53740     53740     shaanxi        109.3000       37.9333           88       157     2012      09        08        252              0.183208      20.198730       0.421830       0.200978       0.046000       0.135700       0.034600       0.584000
53740     53740     shaanxi        109.3000       37.9333           88       157     2012      09        09        253              0.172625      22.887451       0.518469       0.194309       0.045000       0.166400       0.051000       0.507000
53740     53740     shaanxi        109.3000       37.9333           88       157     2012      09        10        254              0.188208      22.823456       7.383416       0.188409       0.068000       0.110800       0.093800       0.833000
53740     53740     shaanxi        109.3000       37.9333           88       157     2012      09        11        255              0.194542      18.203766       2.148984       0.227290       0.051000   -9999.000000       0.064900       0.862000
53740     53740     shaanxi        109.3000       37.9333           88       157     2012      09        12        256              0.186875      17.724426       0.000000       0.217204       0.041000   -9999.000000   -9999.000000       0.406000
53740     53740     shaanxi        109.3000       37.9333           88       157     2012      09        13        257              0.176500      14.668274       0.000000       0.204236       0.031000       0.139700       0.052600       0.526000
53740     53740     shaanxi        109.3000       37.9333           88       157     2012      09        14        258              0.166250      15.753876       0.000000       0.196847       0.047000   -9999.000000       0.049200       0.431000
53740     53740     shaanxi        109.3000       37.9333           88       157     2012      09        15        259              0.155917      17.835541       2.743282       0.190098       0.054000   -9999.000000       0.066400   -9999.000000
53740     53740     shaanxi        109.3000       37.9333           88       157     2012      09        16        260              0.151000      18.000946       0.122951       0.191987       0.048000   -9999.000000       0.071900       0.835000
53740     53740     shaanxi        109.3000       37.9333           88       157     2012      09        17        261              0.147708      16.117737       3.578281       0.201883       0.044500   -9999.000000       0.054300       0.821000
53740     53740     shaanxi        109.3000       37.9333           88       157     2012      09        18        262              0.142167      17.326904       0.067658       0.209291       0.044000       0.108600   -9999.000000       0.620000
53740     53740     shaanxi        109.3000       37.9333           88       157     2012      09        19        263              0.131667      18.709778       0.000000       0.200928       0.043000   -9999.000000       0.048400       0.426000
53740     53740     shaanxi        109.3000       37.9333           88       157     2012      09        20        264              0.124833      19.807129       3.590986       0.190870       0.043000       0.056800       0.073100   -9999.000000
53740     53740     shaanxi        109.3000       37.9333           88       157     2012      09        21        265              0.124833      18.360352       0.092299       0.201117   -9999.000000   -9999.000000       0.062600       0.776000
53740     53740     shaanxi        109.3000       37.9333           88       157     2012      09        22        266              0.119750      18.363617       0.000000       0.201413       0.034000       0.197500       0.052600       0.544000
53740     53740     shaanxi        109.3000       37.9333           88       157     2012      09        23        267              0.112667      19.108459       0.000000       0.191012       0.040500       0.021800       0.056100       0.525000
53740     53740     shaanxi        109.3000       37.9333           88       157     2012      09        24        268              0.160708      20.034149      35.840282       0.184034       0.060000   -9999.000000       0.080000       1.000000
53740     53740     shaanxi        109.3000       37.9333           88       157     2012      09        25        269              0.231958      17.098969       2.994390       0.259356       0.059000   -9999.000000       0.060200   -9999.000000
53740     53740     shaanxi        109.3000       37.9333           88       157     2012      09        26        270              0.227292      14.344116       0.000000       0.248315       0.058000       0.133800       0.053500       0.763000
53740     53740     shaanxi        109.3000       37.9333           88       157     2012      09        27        271              0.219071      16.539276       0.000000       0.225424       0.047000       0.152300       0.067300       0.512000
53740     53740     shaanxi        109.3000       37.9333           88       157     2012      09        28        272              0.205000      13.590820       0.000000       0.214110       0.045000   -9999.000000       0.070300       0.494000
53740     53740     shaanxi        109.3000       37.9333           88       157     2012      09        29        273              0.199083      12.721771       0.000000       0.207664       0.045000   -9999.000000   -9999.000000       0.311000
53740     53740     shaanxi        109.3000       37.9333           88       157     2012      09        30        274              0.191375      13.276947       0.000000       0.202066       0.033000   -9999.000000       0.043300   -9999.000000
53740     53740     shaanxi        109.3000       37.9333           88       157     2012      10        01        275              0.184708      14.646851       0.000000       0.197070       0.040000       0.135300       0.046000       0.411000
53740     53740     shaanxi        109.3000       37.9333           88       157     2012      10        02        276              0.177000      17.032135       0.000000       0.192952       0.034000   -9999.000000       0.058100       0.484000
53740     53740     shaanxi        109.3000       37.9333           88       157     2012      10        03        277              0.168833      16.347046       2.524198       0.188491       0.041000   -9999.000000       0.054100       0.419000
53740     53740     shaanxi        109.3000       37.9333           88       157     2012      10        04        278              0.178500      16.053772       6.047071       0.190997       0.043000   -9999.000000       0.080000       0.465000
53740     53740     shaanxi        109.3000       37.9333           88       157     2012      10        05        279              0.196375      13.976746       0.000000       0.223370       0.044000   -9999.000000   -9999.000000   -9999.000000
53740     53740     shaanxi        109.3000       37.9333           88       157     2012      10        06        280              0.191292      13.892517       0.058322       0.211155       0.050000       0.161000       0.052000       0.528000
53740     53740     shaanxi        109.3000       37.9333           88       157     2012      10        07        281              0.188500      14.990143       0.000000       0.201461       0.054000   -9999.000000       0.061700       0.544000
53740     53740     shaanxi        109.3000       37.9333           88       157     2012      10        08        282              0.187458      12.919525       4.330016       0.199285       0.039000       0.259900       0.057700       0.792000
53740     53740     shaanxi        109.3000       37.9333           88       157     2012      10        09        283              0.184375      14.169159       0.000000       0.212754       0.051000   -9999.000000       0.067900       0.376000
53740     53740     shaanxi        109.3000       37.9333           88       157     2012      10        10        284              0.178833      12.071045       0.000000       0.206255       0.045000   -9999.000000       0.063900       0.492000
53740     53740     shaanxi        109.3000       37.9333           88       157     2012      10        11        285              0.173875      13.210785       0.000000       0.197906       0.046000   -9999.000000       0.050600       0.432000
53740     53740     shaanxi        109.3000       37.9333           88       157     2012      10        12        286              0.167625      14.042755       0.000000       0.192185       0.036000   -9999.000000       0.040300       0.493000
53740     53740     shaanxi        109.3000       37.9333           88       157     2012      10        13        287              0.162167      13.654327       0.000000       0.187355       0.036500   -9999.000000       0.051800       0.365000
53740     53740     shaanxi        109.3000       37.9333           88       157     2012      10        14        288              0.158583      13.033936       0.000000       0.183963       0.039500       0.194900       0.060500   -9999.000000
53740     53740     shaanxi        109.3000       37.9333           88       157     2012      10        15        289              0.167042      13.725769       4.749535       0.182877       0.039000       0.123500       0.081600       0.388000
53740     53740     shaanxi        109.3000       37.9333           88       157     2012      10        16        290              0.172542      11.677612       4.409475       0.203613       0.044000       0.167700   -9999.000000       0.422000
53740     53740     shaanxi        109.3000       37.9333           88       157     2012      10        17        291              0.168417       8.107391       0.282591       0.205332   -9999.000000   -9999.000000       0.044400       0.461000
53740     53740     shaanxi        109.3000       37.9333           88       157     2012      10        18        292              0.166000       8.588898       0.000000       0.215844   -9999.000000   -9999.000000       0.052600       0.330000
53740     53740     shaanxi        109.3000       37.9333           88       157     2012      10        19        293              0.164917       7.004822       0.000000       0.203265       0.035000       0.172200       0.059700   -9999.000000
53740     53740     shaanxi        109.3000       37.9333           88       157     2012      10        20        294              0.163958      10.909119       0.103847       0.197212       0.027500   -9999.000000       0.061500       0.360000
53740     53740     shaanxi        109.3000       37.9333           88       157     2012      10        21        295              0.160792      14.068695       1.505946       0.193131   -9999.000000   -9999.000000       0.088700       0.489000
53740     53740     shaanxi        109.3000       37.9333           88       157     2012      10        22        296              0.158708       7.168091       0.000000       0.201478   -9999.000000   -9999.000000   -9999.000000       0.613000
53740     53740     shaanxi        109.3000       37.9333           88       157     2012      10        23        297              0.157333       7.634186       0.000000       0.194088   -9999.000000       0.234800       0.042500       0.285000
53740     53740     shaanxi        109.3000       37.9333           88       157     2012      10        24        298              0.155375       8.945953       0.000000       0.190472   -9999.000000       0.154200       0.047200   -9999.000000
53740     53740     shaanxi        109.3000       37.9333           88       157     2012      10        25        299              0.000000       9.277039       0.084945       0.186902       0.044500   -9999.000000       0.055900       0.353000
53740     53740     shaanxi        109.3000       37.9333           88       157     2012      10        26        300              0.152870      10.008301       0.000000       0.184298       0.052000       0.149300       0.062000       0.379000
53740     53740     shaanxi        109.3000       37.9333           88       157     2012      10        27        301              0.151958       7.864929       0.000000       0.185093       0.033000   -9999.000000   -9999.000000       0.469000
53740     53740     shaanxi        109.3000       37.9333           88       157     2012      10        28        302              0.000000       9.519318       0.000000       0.182854       0.031000   -9999.000000       0.046700       0.268000
53740     53740     shaanxi        109.3000       37.9333           88       157     2012      10        29        303              0.149167      10.727325       0.032786       0.181408   -9999.000000       0.180800       0.047000   -9999.000000
53740     53740     shaanxi        109.3000       37.9333           88       157     2012      10        30        304              0.146458       6.659882       0.000000       0.169696       0.042000   -9999.000000       0.045300       0.166000
53740     53740     shaanxi        109.3000       37.9333           88       157     2012      10        31        305              0.145042       5.314606       0.000000       0.168097       0.039000   -9999.000000       0.046400       0.274000
53740     53740     shaanxi        109.3000       37.9333           88       157     2012      11        01        306              0.144042       6.056091       0.092358       0.168455       0.038000       0.208000       0.055800       0.324000
53740     53740     shaanxi        109.3000       37.9333           88       157     2012      11        02        307              0.145917       6.656128       0.647643       0.172756   -9999.000000       0.138700   -9999.000000       0.773000
53740     53740     shaanxi        109.3000       37.9333           88       157     2012      11        03        308              0.157083       8.164642       0.000000       0.175540   -9999.000000   -9999.000000       0.043000   -9999.000000
53740     53740     shaanxi        109.3000       37.9333           88       157     2012      11        04        309              0.153417       0.605621       1.223566       0.131210       0.037000   -9999.000000       0.046100       0.174000
53740     53740     shaanxi        109.3000       37.9333           88       157     2012      11        05        310              0.148708      -0.568024       1.756616       0.106842       0.041000   -9999.000000       0.047400       0.050000
53740     53740     shaanxi        109.3000       37.9333           88       157     2012      11        06        311              0.150167       0.606079       0.000000       0.117213       0.050000       0.049100       0.060200       0.249000
53740     53740     shaanxi        109.3000       37.9333           88       157     2012      11        07        312              0.157667       2.840881       0.000000       0.148931       0.054000   -9999.000000       0.052500       0.152000
53740     53740     shaanxi        109.3000       37.9333           88       157     2012      11        08        313              0.158458       3.099243       0.000000       0.148782   -9999.000000       0.022900       0.056000       0.232000
53740     53740     shaanxi        109.3000       37.9333           88       157     2012      11        09        314              0.166292       4.759766       0.247128       0.167089   -9999.000000   -9999.000000       0.032500       0.776000
53740     53740     shaanxi        109.3000       37.9333           88       157     2012      11        10        315              0.174625       3.748383       0.000000       0.170193   -9999.000000       0.182900       0.043000       0.471000
53740     53740     shaanxi        109.3000       37.9333           88       157     2012      11        11        316              0.165500       0.833832       0.000000       0.127808       0.039000       0.101000       0.061800       0.162000
53740     53740     shaanxi        109.3000       37.9333           88       157     2012      11        12        317              0.163958       0.691498       0.000000       0.117509       0.063000   -9999.000000       0.055400   -9999.000000
53740     53740     shaanxi        109.3000       37.9333           88       157     2012      11        13        318              0.000000       1.662354       0.000000       0.132050   -9999.000000       0.051400   -9999.000000       0.365000
53740     53740     shaanxi        109.3000       37.9333           88       157     2012      11        14        319              0.156542       1.456421       0.000000       0.124896   -9999.000000   -9999.000000       0.047200       0.248000
53740     53740     shaanxi        109.3000       37.9333           88       157     2012      11        15        320              0.160625       2.797546       0.541174       0.142821   -9999.000000   -9999.000000       0.028500       0.334000
53740     53740     shaanxi        109.3000       37.9333           88       157     2012      11        16        321              0.160042      -0.161041       1.148541       0.120686       0.044000       0.049200       0.030700       0.234000
53740     53740     shaanxi        109.3000       37.9333           88       157     2012      11        17        322              0.000000      -0.083893       0.000000       0.107993       0.057000   -9999.000000       0.052400   -9999.000000
53740     53740     shaanxi        109.3000       37.9333           88       157     2012      11        18        323              0.161958       1.149414       0.000000       0.127381   -9999.000000   -9999.000000       0.055100       0.470000
53740     53740     shaanxi        109.3000       37.9333           88       157     2012      11        19        324              0.160792       2.140594       0.000000       0.134929   -9999.000000       0.077600   -9999.000000       0.379000
53740     53740     shaanxi        109.3000       37.9333           88       157     2012      11        20        325              0.176125       2.278717       0.000000       0.144038       0.049000       0.189400       0.037400       0.563000
53740     53740     shaanxi        109.3000       37.9333           88       157     2012      11        21        326              0.185208       2.784546       0.000000       0.159594       0.043000       0.138700       0.046700       0.473000
53740     53740     shaanxi        109.3000       37.9333           88       157     2012      11        22        327              0.182083       4.332458       0.000000       0.166029       0.053000   -9999.000000       0.060900   -9999.000000
53740     53740     shaanxi        109.3000       37.9333           88       157     2012      11        23        328              0.170875       0.895691       0.000000       0.130371       0.046000   -9999.000000       0.052500       0.314000
53740     53740     shaanxi        109.3000       37.9333           88       157     2012      11        24        329              0.158625      -0.256470       0.036897       0.108611   -9999.000000   -9999.000000       0.059500       0.271000
53740     53740     shaanxi        109.3000       37.9333           88       157     2012      11        25        330              0.152875       0.649658       0.000000       0.112992   -9999.000000       0.086900       0.042700       0.334000
53740     53740     shaanxi        109.3000       37.9333           88       157     2012      11        26        331              0.121708      -0.809906       4.631231       0.102355       0.048000   -9999.000000   -9999.000000       0.149000
53740     53740     shaanxi        109.3000       37.9333           88       157     2012      11        27        332              0.103125      -0.308838       1.249206       0.107965       0.046000   -9999.000000       0.036300   -9999.000000
53740     53740     shaanxi        109.3000       37.9333           88       157     2012      11        28        333              0.087000      -0.761627       0.000000       0.105549   -9999.000000       0.123500       0.051400       0.071000
53740     53740     shaanxi        109.3000       37.9333           88       157     2012      11        29        334              0.081792      -2.951233       0.000000       0.077364   -9999.000000   -9999.000000       0.045300       0.092000
53740     53740     shaanxi        109.3000       37.9333           88       157     2012      11        30        335              0.084000      -2.439240       0.000000       0.087487   -9999.000000   -9999.000000   -9999.000000       0.130000
53740     53740     shaanxi        109.3000       37.9333           88       157     2012      12        01        336              0.087958      -0.962921       0.171007       0.091190       0.038000       0.047100       0.049800       0.022000
53740     53740     shaanxi        109.3000       37.9333           88       157     2012      12        02        337              0.083750      -0.938812       0.176824       0.099008   -9999.000000   -9999.000000       0.044900   -9999.000000
53740     53740     shaanxi        109.3000       37.9333           88       157     2012      12        03        338              0.076750      -2.181458       0.643714       0.084542       0.035000       0.136500       0.037900       0.085000
53740     53740     shaanxi        109.3000       37.9333           88       157     2012      12        04        339              0.078625      -2.764862       0.287267       0.080158   -9999.000000   -9999.000000       0.052100       0.078000
53740     53740     shaanxi        109.3000       37.9333           88       157     2012      12        05        340              0.071000      -2.326172       0.000000       0.085820   -9999.000000   -9999.000000       0.050000       0.083000
53740     53740     shaanxi        109.3000       37.9333           88       157     2012      12        06        341              0.073917      -3.437134       0.000000       0.071938   -9999.000000   -9999.000000   -9999.000000       0.009000
53740     53740     shaanxi        109.3000       37.9333           88       157     2012      12        07        342              0.068708      -2.698151       0.147117       0.083958   -9999.000000   -9999.000000       0.035400       0.056000
53740     53740     shaanxi        109.3000       37.9333           88       157     2012      12        08        343              0.062958      -4.843536       2.192462       0.068620   -9999.000000   -9999.000000       0.037800       0.059000
53740     53740     shaanxi        109.3000       37.9333           88       157     2012      12        09        344              0.063833      -6.262238       0.000000       0.056835   -9999.000000   -9999.000000       0.052600       0.153000
53740     53740     shaanxi        109.3000       37.9333           88       157     2012      12        10        345              0.063667      -4.361786       0.000000       0.066939   -9999.000000   -9999.000000       0.050700       0.104000
53740     53740     shaanxi        109.3000       37.9333           88       157     2012      12        11        346              0.064833      -3.752289       0.000000       0.077577   -9999.000000   -9999.000000   -9999.000000   -9999.000000
53740     53740     shaanxi        109.3000       37.9333           88       157     2012      12        12        347              0.067750      -2.825348       0.000000       0.080508       0.038000   -9999.000000       0.036000       0.108000
53740     53740     shaanxi        109.3000       37.9333           88       157     2012      12        13        348              0.078292      -1.660583       0.000000       0.083441   -9999.000000       0.138900       0.037000       0.223000
53740     53740     shaanxi        109.3000       37.9333           88       157     2012      12        14        349              0.081875      -1.199921       0.000000       0.083204       0.036000   -9999.000000       0.037400       0.303000
53740     53740     shaanxi        109.3000       37.9333           88       157     2012      12        15        350              0.000000      -0.134247       0.000000       0.100563   -9999.000000   -9999.000000       0.043000       0.236000
53740     53740     shaanxi        109.3000       37.9333           88       157     2012      12        16        351              0.082750      -1.350311       0.000000       0.078688   -9999.000000   -9999.000000       0.052500   -9999.000000
53740     53740     shaanxi        109.3000       37.9333           88       157     2012      12        17        352              0.070875      -2.536438       0.000000       0.073565   -9999.000000   -9999.000000   -9999.000000       0.063000
53740     53740     shaanxi        109.3000       37.9333           88       157     2012      12        18        353              0.065792      -4.703552       0.000000       0.066097   -9999.000000       0.157000       0.036300       0.134000
53740     53740     shaanxi        109.3000       37.9333           88       157     2012      12        19        354              0.069750      -4.552032       0.000000       0.064275   -9999.000000   -9999.000000       0.034900       0.112000
53740     53740     shaanxi        109.3000       37.9333           88       157     2012      12        20        355              0.000000      -4.146271       0.276207       0.059912   -9999.000000   -9999.000000       0.023000       0.111000
53740     53740     shaanxi        109.3000       37.9333           88       157     2012      12        21        356              0.068667      -5.483307       0.000000       0.056453   -9999.000000   -9999.000000       0.038900   -9999.000000
53740     53740     shaanxi        109.3000       37.9333           88       157     2012      12        22        357              0.062833      -8.297516       0.000000       0.050166   -9999.000000   -9999.000000       0.040800       0.051000
53740     53740     shaanxi        109.3000       37.9333           88       157     2012      12        23        358              0.059458     -12.189911       0.000000       0.048117   -9999.000000   -9999.000000       0.033400       0.094000
53740     53740     shaanxi        109.3000       37.9333           88       157     2012      12        24        359              0.059421     -13.013458       0.000000       0.046243   -9999.000000   -9999.000000       0.028200       0.103000
53740     53740     shaanxi        109.3000       37.9333           88       157     2012      12        25        360              0.060292     -10.564209       0.000000       0.046402   -9999.000000   -9999.000000       0.029400       0.062000
53740     53740     shaanxi        109.3000       37.9333           88       157     2012      12        26        361              0.000000      -9.431763       0.000000       0.046473   -9999.000000   -9999.000000       0.036800   -9999.000000
53740     53740     shaanxi        109.3000       37.9333           88       157     2012      12        27        362              0.061909      -7.270996       0.486350       0.048921   -9999.000000   -9999.000000       0.048900       0.049000
53740     53740     shaanxi        109.3000       37.9333           88       157     2012      12        28        363              0.000000      -4.965820       0.000000       0.061258   -9999.000000   -9999.000000   -9999.000000       0.090000
53740     53740     shaanxi        109.3000       37.9333           88       157     2012      12        29        364              0.000000      -7.842590       0.000000       0.050449   -9999.000000   -9999.000000       0.031900       0.022000
53740     53740     shaanxi        109.3000       37.9333           88       157     2012      12        30        365              0.000000     -10.361725       0.000000       0.048132   -9999.000000   -9999.000000       0.031000       0.014000
53740     53740     shaanxi        109.3000       37.9333           88       157     2012      12        31        366              0.059400      -8.192993       0.000000       0.048101   -9999.000000   -9999.000000       0.039000   -9999.000000
