# Supplementary material for: Research on Fusing Multisatellite Soil Moisture Data Based on Bayesian Model Averaging
Source: Hindawi journal article supplement (doi:10.1155/2018/9310838), 2018-06-25
Supplement: f1 [file 9310838.f1.zip › 2012_sm00-10cm_daily_ZDB_ZHY_53748_366days_allin.txt]

53748     53748     shaanxi        109.7000       37.1833           91       159     2012      01        01        001              0.000000   -9999.000000       0.000000   -9999.000000       0.063000   -9999.000000       0.031400   -9999.000000
53748     53748     shaanxi        109.7000       37.1833           91       159     2012      01        02        002              0.142917      -4.133972       0.000000       0.152251   -9999.000000   -9999.000000   -9999.000000       0.001000
53748     53748     shaanxi        109.7000       37.1833           91       159     2012      01        03        003              0.000000      -6.150909       0.000000       0.137978   -9999.000000   -9999.000000       0.033700   -9999.000000
53748     53748     shaanxi        109.7000       37.1833           91       159     2012      01        04        004              0.136478      -8.848816       0.000000       0.127064   -9999.000000   -9999.000000       0.031300   -9999.000000
53748     53748     shaanxi        109.7000       37.1833           91       159     2012      01        05        005              0.136042      -8.803345       0.000000       0.125865   -9999.000000   -9999.000000       0.033800       0.006000
53748     53748     shaanxi        109.7000       37.1833           91       159     2012      01        06        006              0.138625      -7.152191       0.000000       0.133065   -9999.000000   -9999.000000       0.033800       0.005000
53748     53748     shaanxi        109.7000       37.1833           91       159     2012      01        07        007              0.136583      -4.597198       0.000000       0.147072   -9999.000000   -9999.000000       0.034200   -9999.000000
53748     53748     shaanxi        109.7000       37.1833           91       159     2012      01        08        008              0.000000      -4.736786       0.000000       0.147878   -9999.000000   -9999.000000   -9999.000000   -9999.000000
53748     53748     shaanxi        109.7000       37.1833           91       159     2012      01        09        009              0.137667      -4.877106       0.000000       0.147962   -9999.000000   -9999.000000   -9999.000000   -9999.000000
53748     53748     shaanxi        109.7000       37.1833           91       159     2012      01        10        010              0.136292      -4.683960       0.000000       0.152059   -9999.000000   -9999.000000       0.033400   -9999.000000
53748     53748     shaanxi        109.7000       37.1833           91       159     2012      01        11        011              0.134375      -5.589783       0.000000       0.146950   -9999.000000   -9999.000000       0.031600       0.033000
53748     53748     shaanxi        109.7000       37.1833           91       159     2012      01        12        012              0.134083      -6.182800       0.000000       0.142802   -9999.000000       0.089800       0.034800   -9999.000000
53748     53748     shaanxi        109.7000       37.1833           91       159     2012      01        13        013              0.135750      -5.444366       0.000000       0.149083       0.059000   -9999.000000       0.032800   -9999.000000
53748     53748     shaanxi        109.7000       37.1833           91       159     2012      01        14        014              0.134125      -4.715546       0.000000       0.149331   -9999.000000   -9999.000000   -9999.000000   -9999.000000
53748     53748     shaanxi        109.7000       37.1833           91       159     2012      01        15        015              0.134083      -4.770447       0.000000       0.148944   -9999.000000   -9999.000000       0.032800       0.004000
53748     53748     shaanxi        109.7000       37.1833           91       159     2012      01        16        016              0.134500      -3.819855       0.533854       0.158529       0.059000   -9999.000000       0.031000       0.002000
53748     53748     shaanxi        109.7000       37.1833           91       159     2012      01        17        017              0.000000      -3.323212       0.357031       0.166702       0.053000       0.180400       0.029700   -9999.000000
53748     53748     shaanxi        109.7000       37.1833           91       159     2012      01        18        018              0.138125      -2.958435       0.000000       0.165786       0.062000   -9999.000000       0.030800   -9999.000000
53748     53748     shaanxi        109.7000       37.1833           91       159     2012      01        19        019              0.135625      -2.570892       0.000000       0.171885   -9999.000000   -9999.000000   -9999.000000       0.005000
53748     53748     shaanxi        109.7000       37.1833           91       159     2012      01        20        020              0.134708      -1.653351       0.000000       0.175227   -9999.000000   -9999.000000       0.031100   -9999.000000
53748     53748     shaanxi        109.7000       37.1833           91       159     2012      01        21        021              0.131625      -4.782196       0.000000       0.144284   -9999.000000   -9999.000000       0.027200   -9999.000000
53748     53748     shaanxi        109.7000       37.1833           91       159     2012      01        22        022              0.129792      -8.223297       0.000000       0.129353   -9999.000000   -9999.000000       0.028500   -9999.000000
53748     53748     shaanxi        109.7000       37.1833           91       159     2012      01        23        023              0.128417      -9.698303       0.000000       0.125321   -9999.000000   -9999.000000       0.032400   -9999.000000
53748     53748     shaanxi        109.7000       37.1833           91       159     2012      01        24        024              0.127458      -8.956024       0.000000       0.123822   -9999.000000   -9999.000000   -9999.000000   -9999.000000
53748     53748     shaanxi        109.7000       37.1833           91       159     2012      01        25        025              0.127750      -9.151031       0.000000       0.124350   -9999.000000   -9999.000000   -9999.000000   -9999.000000
53748     53748     shaanxi        109.7000       37.1833           91       159     2012      01        26        026              0.128917      -7.208710       0.000000       0.135913   -9999.000000   -9999.000000       0.034500   -9999.000000
53748     53748     shaanxi        109.7000       37.1833           91       159     2012      01        27        027              0.129083      -5.279694       0.000000       0.149535       0.062000       0.150900       0.034400   -9999.000000
53748     53748     shaanxi        109.7000       37.1833           91       159     2012      01        28        028              0.130292      -4.047607       0.000000       0.156444       0.063000   -9999.000000       0.031100   -9999.000000
53748     53748     shaanxi        109.7000       37.1833           91       159     2012      01        29        029              0.133083      -3.782959       0.000000       0.160035       0.064000   -9999.000000       0.035000   -9999.000000
53748     53748     shaanxi        109.7000       37.1833           91       159     2012      01        30        030              0.135750      -3.759857       0.000000       0.163307   -9999.000000   -9999.000000       0.035000       0.040000
53748     53748     shaanxi        109.7000       37.1833           91       159     2012      01        31        031              0.141042      -2.253815       0.000000       0.175253   -9999.000000   -9999.000000   -9999.000000       0.019000
53748     53748     shaanxi        109.7000       37.1833           91       159     2012      02        01        032              0.131875      -0.730103       0.000000       0.188716       0.054000   -9999.000000       0.030200   -9999.000000
53748     53748     shaanxi        109.7000       37.1833           91       159     2012      02        02        033              0.130500      -5.681183       0.000000       0.148577       0.058000   -9999.000000       0.034900   -9999.000000
53748     53748     shaanxi        109.7000       37.1833           91       159     2012      02        03        034              0.134167      -6.227783       0.000000       0.141098       0.064000   -9999.000000       0.033800   -9999.000000
53748     53748     shaanxi        109.7000       37.1833           91       159     2012      02        04        035              0.137167      -3.349915       0.000000       0.163531       0.061000   -9999.000000       0.036000       0.027000
53748     53748     shaanxi        109.7000       37.1833           91       159     2012      02        05        036              0.142125      -1.786652       0.000000       0.178365   -9999.000000   -9999.000000   -9999.000000       0.011000
53748     53748     shaanxi        109.7000       37.1833           91       159     2012      02        06        037              0.131292      -1.328400       0.323631       0.182369   -9999.000000   -9999.000000       0.035100   -9999.000000
53748     53748     shaanxi        109.7000       37.1833           91       159     2012      02        07        038              0.127875      -6.720673       0.293335       0.143517       0.058000   -9999.000000       0.034100   -9999.000000
53748     53748     shaanxi        109.7000       37.1833           91       159     2012      02        08        039              0.124000      -7.652802       0.000000       0.132332   -9999.000000   -9999.000000       0.038700   -9999.000000
53748     53748     shaanxi        109.7000       37.1833           91       159     2012      02        09        040              0.124583      -8.271912       0.000000       0.125553   -9999.000000   -9999.000000       0.035900       0.035000
53748     53748     shaanxi        109.7000       37.1833           91       159     2012      02        10        041              0.127625      -7.138458       0.000000       0.132081   -9999.000000   -9999.000000       0.036300   -9999.000000
53748     53748     shaanxi        109.7000       37.1833           91       159     2012      02        11        042              0.129708      -5.335297       0.000000       0.150052   -9999.000000   -9999.000000   -9999.000000   -9999.000000
53748     53748     shaanxi        109.7000       37.1833           91       159     2012      02        12        043              0.132208      -1.740112       0.619269       0.174819       0.067000   -9999.000000   -9999.000000       0.004000
53748     53748     shaanxi        109.7000       37.1833           91       159     2012      02        13        044              0.132333      -1.392853       0.037375       0.178559       0.066000       0.019000   -9999.000000       0.121000
53748     53748     shaanxi        109.7000       37.1833           91       159     2012      02        14        045              0.134792      -0.818970       0.000000       0.188969       0.060000   -9999.000000   -9999.000000       0.065000
53748     53748     shaanxi        109.7000       37.1833           91       159     2012      02        15        046              0.136833      -0.460297       0.023056       0.190164   -9999.000000   -9999.000000       0.040400   -9999.000000
53748     53748     shaanxi        109.7000       37.1833           91       159     2012      02        16        047              0.134292      -1.068268       0.117853       0.187227   -9999.000000   -9999.000000       0.038200   -9999.000000
53748     53748     shaanxi        109.7000       37.1833           91       159     2012      02        17        048              0.131708      -3.593689       1.815311       0.168706       0.057000       0.207800       0.041700       0.018000
53748     53748     shaanxi        109.7000       37.1833           91       159     2012      02        18        049              0.132375      -4.588348       0.000000       0.159372       0.055000   -9999.000000       0.035500       0.061000
53748     53748     shaanxi        109.7000       37.1833           91       159     2012      02        19        050              0.137042      -4.394287       0.000000       0.160900       0.061000   -9999.000000       0.043000       0.097000
53748     53748     shaanxi        109.7000       37.1833           91       159     2012      02        20        051              0.150083      -1.208160       0.000000       0.180902   -9999.000000   -9999.000000       0.041600   -9999.000000
53748     53748     shaanxi        109.7000       37.1833           91       159     2012      02        21        052              0.165625       1.143127       0.000000       0.201211   -9999.000000   -9999.000000   -9999.000000   -9999.000000
53748     53748     shaanxi        109.7000       37.1833           91       159     2012      02        22        053              0.176250       3.148376       0.000000       0.219866       0.057000   -9999.000000   -9999.000000       0.064000
53748     53748     shaanxi        109.7000       37.1833           91       159     2012      02        23        054              0.179833       3.377930       0.000000       0.223436       0.057000   -9999.000000       0.044000   -9999.000000
53748     53748     shaanxi        109.7000       37.1833           91       159     2012      02        24        055              0.176542       2.834473       0.000000       0.225674       0.071000   -9999.000000       0.041800       0.131000
53748     53748     shaanxi        109.7000       37.1833           91       159     2012      02        25        056              0.147125       1.337708       0.000000       0.209629   -9999.000000       0.056000       0.045500   -9999.000000
53748     53748     shaanxi        109.7000       37.1833           91       159     2012      02        26        057              0.166208      -1.597900       0.000000       0.177034   -9999.000000   -9999.000000       0.041100       0.080000
53748     53748     shaanxi        109.7000       37.1833           91       159     2012      02        27        058              0.182667       0.395996       0.000000       0.193714       0.063000   -9999.000000   -9999.000000       0.085000
53748     53748     shaanxi        109.7000       37.1833           91       159     2012      02        28        059              0.188750       2.418945       0.000000       0.215728       0.058000       0.030100   -9999.000000       0.120000
53748     53748     shaanxi        109.7000       37.1833           91       159     2012      02        29        060              0.000000   -9999.000000       0.000000   -9999.000000       0.064000   -9999.000000   -9999.000000   -9999.000000
53748     53748     shaanxi        109.7000       37.1833           91       159     2012      03        01        061              0.211250       2.883942       0.000000       0.219707       0.069000   -9999.000000       0.047300   -9999.000000
53748     53748     shaanxi        109.7000       37.1833           91       159     2012      03        02        062              0.222542       2.761047       0.000000       0.225211       0.071000       0.005600       0.042000       0.170000
53748     53748     shaanxi        109.7000       37.1833           91       159     2012      03        03        063              0.221792       1.801483       0.000000       0.226163   -9999.000000   -9999.000000       0.056000       0.325000
53748     53748     shaanxi        109.7000       37.1833           91       159     2012      03        04        064              0.224208       1.171173       0.000000       0.217171       0.074000       0.005700       0.056600       0.490000
53748     53748     shaanxi        109.7000       37.1833           91       159     2012      03        05        065              0.209875       1.821533       0.069508       0.225280       0.069000   -9999.000000       0.048000       0.081000
53748     53748     shaanxi        109.7000       37.1833           91       159     2012      03        06        066              0.194375       0.831635       0.032061       0.203933       0.071000       0.228600       0.038300   -9999.000000
53748     53748     shaanxi        109.7000       37.1833           91       159     2012      03        07        067              0.000000       0.541962       0.000000       0.196383   -9999.000000       0.007700       0.045600       0.169000
53748     53748     shaanxi        109.7000       37.1833           91       159     2012      03        08        068              0.227708       3.005615       0.000000       0.215850       0.067000   -9999.000000       0.044400       0.235000
53748     53748     shaanxi        109.7000       37.1833           91       159     2012      03        09        069              0.218375       2.799652       0.000000       0.223576       0.062000       0.005600       0.052100       0.332000
53748     53748     shaanxi        109.7000       37.1833           91       159     2012      03        10        070              0.210542       3.658356       0.000000       0.225957       0.057000   -9999.000000   -9999.000000       0.049000
53748     53748     shaanxi        109.7000       37.1833           91       159     2012      03        11        071              0.220167       3.606842       0.000000       0.215149       0.059000   -9999.000000       0.043000   -9999.000000
53748     53748     shaanxi        109.7000       37.1833           91       159     2012      03        12        072              0.219583       3.489319       0.000000       0.219440   -9999.000000       0.029800       0.039200       0.169000
53748     53748     shaanxi        109.7000       37.1833           91       159     2012      03        13        073              0.218208       5.057037       0.000000       0.220111   -9999.000000   -9999.000000       0.044400       0.174000
53748     53748     shaanxi        109.7000       37.1833           91       159     2012      03        14        074              0.227708       5.991119       0.000000       0.222729       0.058500       0.095500   -9999.000000       0.217000
53748     53748     shaanxi        109.7000       37.1833           91       159     2012      03        15        075              0.252375       8.174591       0.000000       0.237444   -9999.000000   -9999.000000       0.059200       0.526000
53748     53748     shaanxi        109.7000       37.1833           91       159     2012      03        16        076              0.240500       4.523773       0.030207       0.240511       0.064000   -9999.000000   -9999.000000   -9999.000000
53748     53748     shaanxi        109.7000       37.1833           91       159     2012      03        17        077              0.227167       8.548889       0.058986       0.238518       0.057000       0.039600       0.039800       0.273000
53748     53748     shaanxi        109.7000       37.1833           91       159     2012      03        18        078              0.221250       9.101135       0.000000       0.232815       0.068000   -9999.000000       0.049500       0.345000
53748     53748     shaanxi        109.7000       37.1833           91       159     2012      03        19        079              0.217583       6.328644       0.391571       0.232725       0.058000   -9999.000000       0.045100       0.290000
53748     53748     shaanxi        109.7000       37.1833           91       159     2012      03        20        080              0.213042       6.227203       0.000000       0.234595       0.061500       0.054000       0.052400       0.166000
53748     53748     shaanxi        109.7000       37.1833           91       159     2012      03        21        081              0.237500       7.867035       0.088729       0.236743   -9999.000000   -9999.000000   -9999.000000   -9999.000000
53748     53748     shaanxi        109.7000       37.1833           91       159     2012      03        22        082              0.251125       3.696655       0.529220       0.234852   -9999.000000       0.122900       0.056700       0.673000
53748     53748     shaanxi        109.7000       37.1833           91       159     2012      03        23        083              0.220750       4.062073       0.569727       0.235774   -9999.000000   -9999.000000       0.041300   -9999.000000
53748     53748     shaanxi        109.7000       37.1833           91       159     2012      03        24        084              0.212708       5.712311       0.000000       0.222974   -9999.000000   -9999.000000       0.036200       0.216000
53748     53748     shaanxi        109.7000       37.1833           91       159     2012      03        25        085              0.000000       8.135193       0.000000       0.222212       0.053000       0.039500       0.042000   -9999.000000
53748     53748     shaanxi        109.7000       37.1833           91       159     2012      03        26        086              0.199583       9.625153       0.251412       0.220963       0.054000   -9999.000000       0.052400       0.189000
53748     53748     shaanxi        109.7000       37.1833           91       159     2012      03        27        087              0.191583      10.917542       0.000000       0.217549       0.053000   -9999.000000   -9999.000000       0.228000
53748     53748     shaanxi        109.7000       37.1833           91       159     2012      03        28        088              0.197625      12.137970       0.000000       0.212189   -9999.000000   -9999.000000       0.064500       0.168000
53748     53748     shaanxi        109.7000       37.1833           91       159     2012      03        29        089              0.206208      11.565674       0.000000       0.213190       0.063000   -9999.000000       0.052000       0.185000
53748     53748     shaanxi        109.7000       37.1833           91       159     2012      03        30        090              0.194167      12.298767       0.000000       0.209183       0.044000       0.068300       0.039500   -9999.000000
53748     53748     shaanxi        109.7000       37.1833           91       159     2012      03        31        091              0.187583       8.467316       0.000000       0.205324       0.053500   -9999.000000       0.042100       0.061000
53748     53748     shaanxi        109.7000       37.1833           91       159     2012      04        01        092              0.183792      13.071686       0.102507       0.200015       0.056000       0.162500       0.048600       0.200000
53748     53748     shaanxi        109.7000       37.1833           91       159     2012      04        02        093              0.183958      13.785095       0.169114       0.196708       0.060000   -9999.000000   -9999.000000       0.120000
53748     53748     shaanxi        109.7000       37.1833           91       159     2012      04        03        094              0.181083       8.361359       0.199515       0.195873   -9999.000000   -9999.000000       0.041400       0.070000
53748     53748     shaanxi        109.7000       37.1833           91       159     2012      04        04        095              0.175542      11.491150       0.547948       0.195809       0.053000       0.088800       0.049100   -9999.000000
53748     53748     shaanxi        109.7000       37.1833           91       159     2012      04        05        096              0.172250      13.698273       0.000000       0.191007       0.049500   -9999.000000       0.039600       0.050000
53748     53748     shaanxi        109.7000       37.1833           91       159     2012      04        06        097              0.170542      13.319794       0.268637       0.187036       0.054000       0.027500       0.045300       0.085000
53748     53748     shaanxi        109.7000       37.1833           91       159     2012      04        07        098              0.167625      14.010468       0.022766       0.183835       0.052000       0.062400   -9999.000000       0.085000
53748     53748     shaanxi        109.7000       37.1833           91       159     2012      04        08        099              0.164167      15.810638       0.000000       0.179886       0.053000   -9999.000000       0.047000       0.011000
53748     53748     shaanxi        109.7000       37.1833           91       159     2012      04        09        100              0.163417      17.860382       0.000000       0.176251       0.055000       0.064500       0.042000   -9999.000000
53748     53748     shaanxi        109.7000       37.1833           91       159     2012      04        10        101              0.163250      17.855927       0.463257       0.175591       0.055000   -9999.000000       0.049400       0.025000
53748     53748     shaanxi        109.7000       37.1833           91       159     2012      04        11        102              0.177542      17.443787       0.530002       0.176239       0.060000   -9999.000000       0.054700       0.679000
53748     53748     shaanxi        109.7000       37.1833           91       159     2012      04        12        103              0.189833      10.531738       0.270740       0.182930       0.060000   -9999.000000       0.050100       0.520000
53748     53748     shaanxi        109.7000       37.1833           91       159     2012      04        13        104              0.175375      12.022125       0.000000       0.188439       0.056000   -9999.000000   -9999.000000   -9999.000000
53748     53748     shaanxi        109.7000       37.1833           91       159     2012      04        14        105              0.165708      15.668457       0.000000       0.181267       0.052000       0.147500       0.042400   -9999.000000
53748     53748     shaanxi        109.7000       37.1833           91       159     2012      04        15        106              0.159458      16.155304       0.000000       0.176215       0.045500   -9999.000000       0.045200       0.005000
53748     53748     shaanxi        109.7000       37.1833           91       159     2012      04        16        107              0.154458      18.147827       0.000000       0.171396       0.043000   -9999.000000       0.038300       0.037000
53748     53748     shaanxi        109.7000       37.1833           91       159     2012      04        17        108              0.153292      18.285706       0.981955       0.168028       0.048000       0.009200       0.043400       0.007000
53748     53748     shaanxi        109.7000       37.1833           91       159     2012      04        18        109              0.141417      17.571808       0.389385       0.168894       0.059000   -9999.000000   -9999.000000       0.011000
53748     53748     shaanxi        109.7000       37.1833           91       159     2012      04        19        110              0.135542      18.866455       0.000000       0.169108       0.052000       0.044200   -9999.000000   -9999.000000
53748     53748     shaanxi        109.7000       37.1833           91       159     2012      04        20        111              0.133792      17.043610       0.000000       0.169023       0.047000   -9999.000000       0.040700       0.001000
53748     53748     shaanxi        109.7000       37.1833           91       159     2012      04        21        112              0.130083      19.299866       0.000000       0.167481       0.044500   -9999.000000       0.047400   -9999.000000
53748     53748     shaanxi        109.7000       37.1833           91       159     2012      04        22        113              0.128333      20.521576       0.076665       0.164714       0.046000   -9999.000000   -9999.000000       0.011000
53748     53748     shaanxi        109.7000       37.1833           91       159     2012      04        23        114              0.129083      23.789246      19.736084       0.163432       0.051000   -9999.000000       0.043600   -9999.000000
53748     53748     shaanxi        109.7000       37.1833           91       159     2012      04        24        115              0.126625      22.971222       0.239670       0.254869       0.064000       0.073600   -9999.000000       0.519000
53748     53748     shaanxi        109.7000       37.1833           91       159     2012      04        25        116              0.000000      15.333618       0.000000       0.274484       0.052000       0.024200       0.050700   -9999.000000
53748     53748     shaanxi        109.7000       37.1833           91       159     2012      04        26        117              0.124542      14.383636       0.000000       0.247739       0.046000       0.220700       0.048400       0.023000
53748     53748     shaanxi        109.7000       37.1833           91       159     2012      04        27        118              0.121875      18.176971       0.000000       0.231009       0.052000       0.005700       0.039500       0.011000
53748     53748     shaanxi        109.7000       37.1833           91       159     2012      04        28        119              0.122250      19.907654       3.620019       0.215697   -9999.000000   -9999.000000       0.046600   -9999.000000
53748     53748     shaanxi        109.7000       37.1833           91       159     2012      04        29        120              0.122250      20.390015       0.000000       0.237988       0.051000       0.112100       0.049000       0.003000
53748     53748     shaanxi        109.7000       37.1833           91       159     2012      04        30        121              0.148875      23.737152       0.811719       0.221831       0.063000       0.062200   -9999.000000       0.115000
53748     53748     shaanxi        109.7000       37.1833           91       159     2012      05        01        122              0.252792      20.903381       4.558019       0.216581       0.083000   -9999.000000       0.069700       0.892000
53748     53748     shaanxi        109.7000       37.1833           91       159     2012      05        02        123              0.225042      16.390900       0.075425       0.266643       0.067000       0.063200       0.062000       0.176000
53748     53748     shaanxi        109.7000       37.1833           91       159     2012      05        03        124              0.204125      21.168671       0.000000       0.241400       0.055000   -9999.000000       0.043600   -9999.000000
53748     53748     shaanxi        109.7000       37.1833           91       159     2012      05        04        125              0.185458      21.625092       0.000000       0.225670       0.048000   -9999.000000       0.045600       0.056000
53748     53748     shaanxi        109.7000       37.1833           91       159     2012      05        05        126              0.166833      23.494293       0.000000       0.208076       0.047000   -9999.000000       0.043200       0.061000
53748     53748     shaanxi        109.7000       37.1833           91       159     2012      05        06        127              0.160667      24.275360       0.967227       0.193534       0.051500   -9999.000000       0.067400       0.067000
53748     53748     shaanxi        109.7000       37.1833           91       159     2012      05        07        128              0.173250      25.047699       0.217760       0.192622   -9999.000000       0.051500       0.052500       0.064000
53748     53748     shaanxi        109.7000       37.1833           91       159     2012      05        08        129              0.158375      24.120270       0.204052       0.195205       0.046000   -9999.000000       0.054400   -9999.000000
53748     53748     shaanxi        109.7000       37.1833           91       159     2012      05        09        130              0.145500      26.742462       0.348410       0.185227   -9999.000000   -9999.000000       0.046500       0.031000
53748     53748     shaanxi        109.7000       37.1833           91       159     2012      05        10        131              0.160417      26.821228       6.208674       0.180546   -9999.000000   -9999.000000       0.049300       0.063000
53748     53748     shaanxi        109.7000       37.1833           91       159     2012      05        11        132              0.204458      26.755219       0.168921       0.207376       0.057500   -9999.000000   -9999.000000       0.659000
53748     53748     shaanxi        109.7000       37.1833           91       159     2012      05        12        133              0.174625      20.073273       2.597901       0.236907       0.048500       0.133300       0.052500       0.010000
53748     53748     shaanxi        109.7000       37.1833           91       159     2012      05        13        134              0.140333      18.990234       0.000000       0.212686       0.053000   -9999.000000       0.049600   -9999.000000
53748     53748     shaanxi        109.7000       37.1833           91       159     2012      05        14        135              0.128958      16.322876       0.000000       0.202939       0.047000       0.163100       0.062800   -9999.000000
53748     53748     shaanxi        109.7000       37.1833           91       159     2012      05        15        136              0.122542      19.121613       0.829154       0.190234       0.049000   -9999.000000       0.053000   -9999.000000
53748     53748     shaanxi        109.7000       37.1833           91       159     2012      05        16        137              0.117417      20.939728       0.088737       0.179976       0.049500   -9999.000000       0.056000       0.025000
53748     53748     shaanxi        109.7000       37.1833           91       159     2012      05        17        138              0.113917      21.333160       0.000000       0.173877       0.047000   -9999.000000   -9999.000000   -9999.000000
53748     53748     shaanxi        109.7000       37.1833           91       159     2012      05        18        139              0.112792      24.557129       3.252203       0.168931       0.057000       0.106100       0.079500   -9999.000000
53748     53748     shaanxi        109.7000       37.1833           91       159     2012      05        19        140              0.112292      26.505463       0.000000       0.187362       0.050000   -9999.000000       0.064100       0.030000
53748     53748     shaanxi        109.7000       37.1833           91       159     2012      05        20        141              0.120167      26.897430       4.710979       0.193085   -9999.000000   -9999.000000       0.054200   -9999.000000
53748     53748     shaanxi        109.7000       37.1833           91       159     2012      05        21        142              0.265042      26.514862      10.621461       0.192758       0.084000   -9999.000000       0.087900       0.849000
53748     53748     shaanxi        109.7000       37.1833           91       159     2012      05        22        143              0.235750      16.447815       0.221540       0.293638       0.061500   -9999.000000       0.062600   -9999.000000
53748     53748     shaanxi        109.7000       37.1833           91       159     2012      05        23        144              0.216625      19.265106       0.055174       0.258818   -9999.000000       0.269900       0.067600       0.170000
53748     53748     shaanxi        109.7000       37.1833           91       159     2012      05        24        145              0.205625      18.848358       0.163648       0.242089       0.055000   -9999.000000       0.057100       0.079000
53748     53748     shaanxi        109.7000       37.1833           91       159     2012      05        25        146              0.000000      20.736542       0.112446       0.227731       0.059000       0.092000       0.062900       0.087000
53748     53748     shaanxi        109.7000       37.1833           91       159     2012      05        26        147              0.185667      22.536835       0.027604       0.213032       0.054000   -9999.000000       0.050900       0.033000
53748     53748     shaanxi        109.7000       37.1833           91       159     2012      05        27        148              0.175333      24.311920       0.000000       0.199722       0.047500   -9999.000000       0.055000   -9999.000000
53748     53748     shaanxi        109.7000       37.1833           91       159     2012      05        28        149              0.200208      26.350006       6.892739       0.187178       0.062500   -9999.000000   -9999.000000       0.052000
53748     53748     shaanxi        109.7000       37.1833           91       159     2012      05        29        150              0.225417      23.782532       0.000000       0.223486       0.050000   -9999.000000       0.060800       0.032000
53748     53748     shaanxi        109.7000       37.1833           91       159     2012      05        30        151              0.200833      21.888855       0.000000       0.235028       0.055000       0.079900       0.056600   -9999.000000
53748     53748     shaanxi        109.7000       37.1833           91       159     2012      05        31        152              0.186083      23.366821       0.073956       0.210241       0.061000   -9999.000000       0.051200   -9999.000000
53748     53748     shaanxi        109.7000       37.1833           91       159     2012      06        01        153              0.176375      24.630066       0.387913       0.198951       0.061000   -9999.000000       0.058100   -9999.000000
53748     53748     shaanxi        109.7000       37.1833           91       159     2012      06        02        154              0.164917      24.972443       0.856553       0.191691       0.054500       0.174200       0.053100       0.077000
53748     53748     shaanxi        109.7000       37.1833           91       159     2012      06        03        155              0.159792      24.133942       3.013150       0.193363       0.058000   -9999.000000   -9999.000000       0.492000
53748     53748     shaanxi        109.7000       37.1833           91       159     2012      06        04        156              0.154917      24.176453       0.000000       0.217227       0.052000   -9999.000000       0.067700       0.493000
53748     53748     shaanxi        109.7000       37.1833           91       159     2012      06        05        157              0.152125      26.293152       1.352631       0.201738   -9999.000000       0.046600       0.085300       0.030000
53748     53748     shaanxi        109.7000       37.1833           91       159     2012      06        06        158              0.157875      25.706787       0.230546       0.192469       0.057000   -9999.000000       0.067800   -9999.000000
53748     53748     shaanxi        109.7000       37.1833           91       159     2012      06        07        159              0.154417      21.442017       1.711874       0.201537       0.062000   -9999.000000       0.077800       0.066000
53748     53748     shaanxi        109.7000       37.1833           91       159     2012      06        08        160              0.160542      22.527893       0.807209       0.208797       0.060000   -9999.000000       0.066500       0.087000
53748     53748     shaanxi        109.7000       37.1833           91       159     2012      06        09        161              0.155792      23.113373       0.000000       0.204825       0.046000   -9999.000000       0.069800       0.103000
53748     53748     shaanxi        109.7000       37.1833           91       159     2012      06        10        162              0.147750      27.190338       0.000000       0.182327       0.050000       0.213000       0.059800       0.010000
53748     53748     shaanxi        109.7000       37.1833           91       159     2012      06        11        163              0.000000      24.531647       0.000000       0.170415       0.050000   -9999.000000       0.071600   -9999.000000
53748     53748     shaanxi        109.7000       37.1833           91       159     2012      06        12        164              0.137417      25.545410       0.000000       0.165254       0.050000       0.111500       0.063400       0.013000
53748     53748     shaanxi        109.7000       37.1833           91       159     2012      06        13        165              0.133750      27.574982       0.178887       0.162234   -9999.000000   -9999.000000       0.066600       0.087000
53748     53748     shaanxi        109.7000       37.1833           91       159     2012      06        14        166              0.131917      27.402771       0.000000       0.160968       0.052000   -9999.000000   -9999.000000       0.092000
53748     53748     shaanxi        109.7000       37.1833           91       159     2012      06        15        167              0.129208      26.015808       0.000000       0.160647       0.049000   -9999.000000       0.066800       0.028000
53748     53748     shaanxi        109.7000       37.1833           91       159     2012      06        16        168              0.125917      26.468811       0.000000       0.159848       0.052000   -9999.000000       0.065200   -9999.000000
53748     53748     shaanxi        109.7000       37.1833           91       159     2012      06        17        169              0.117833      28.696136       0.000000       0.158486       0.048000       0.090800       0.070200       0.050000
53748     53748     shaanxi        109.7000       37.1833           91       159     2012      06        18        170              0.117042      30.271088       0.321616       0.157710       0.050000       0.012500       0.057900   -9999.000000
53748     53748     shaanxi        109.7000       37.1833           91       159     2012      06        19        171              0.123458      30.435608       5.427073       0.157907       0.051000   -9999.000000       0.058500       0.118000
53748     53748     shaanxi        109.7000       37.1833           91       159     2012      06        20        172              0.123208      26.887390       3.118317       0.204102       0.054000       0.179600   -9999.000000   -9999.000000
53748     53748     shaanxi        109.7000       37.1833           91       159     2012      06        21        173              0.122583      27.795746       0.252383       0.216482       0.061000   -9999.000000       0.065200       0.005000
53748     53748     shaanxi        109.7000       37.1833           91       159     2012      06        22        174              0.122750      26.390076       2.295196       0.207275       0.058000   -9999.000000       0.070500       0.153000
53748     53748     shaanxi        109.7000       37.1833           91       159     2012      06        23        175              0.208917      29.409271       9.945109       0.200105       0.055000       0.124900       0.055600       0.163000
53748     53748     shaanxi        109.7000       37.1833           91       159     2012      06        24        176              0.295000      28.526093       0.775734       0.248233       0.080000   -9999.000000       0.082600       0.438000
53748     53748     shaanxi        109.7000       37.1833           91       159     2012      06        25        177              0.260667      27.756287       0.094146       0.250695       0.071000       0.108400   -9999.000000   -9999.000000
53748     53748     shaanxi        109.7000       37.1833           91       159     2012      06        26        178              0.243167      27.369354       0.096195       0.226239       0.068000   -9999.000000       0.081700       0.224000
53748     53748     shaanxi        109.7000       37.1833           91       159     2012      06        27        179              0.262833      25.560211      16.164124       0.212133       0.081000   -9999.000000       0.103700       0.932000
53748     53748     shaanxi        109.7000       37.1833           91       159     2012      06        28        180              0.379458      23.096985      26.727808       0.276468       0.093000       0.390400       0.087600       0.912000
53748     53748     shaanxi        109.7000       37.1833           91       159     2012      06        29        181              0.370333      21.718628       1.930451       0.340069       0.101000   -9999.000000       0.104900   -9999.000000
53748     53748     shaanxi        109.7000       37.1833           91       159     2012      06        30        182              0.319500      24.621918       0.106562       0.321733       0.072000       0.164300       0.088500   -9999.000000
53748     53748     shaanxi        109.7000       37.1833           91       159     2012      07        01        183              0.287208      26.660950       0.520379       0.293356       0.075000   -9999.000000   -9999.000000       0.422000
53748     53748     shaanxi        109.7000       37.1833           91       159     2012      07        02        184              0.260042      28.056946       0.000000       0.276001       0.069000   -9999.000000       0.082400       0.349000
53748     53748     shaanxi        109.7000       37.1833           91       159     2012      07        03        185              0.244333      28.094971       1.005084       0.260009       0.061500   -9999.000000       0.100300       0.247000
53748     53748     shaanxi        109.7000       37.1833           91       159     2012      07        04        186              0.238417      27.074127       0.727560       0.256562       0.064000   -9999.000000       0.078200       0.307000
53748     53748     shaanxi        109.7000       37.1833           91       159     2012      07        05        187              0.233042      26.965942       4.242161       0.251963       0.056000       0.113200       0.074900   -9999.000000
53748     53748     shaanxi        109.7000       37.1833           91       159     2012      07        06        188              0.225750      28.827515       0.350363       0.236405   -9999.000000   -9999.000000       0.074500       0.212000
53748     53748     shaanxi        109.7000       37.1833           91       159     2012      07        07        189              0.224167      28.154907       0.083538       0.228083   -9999.000000   -9999.000000   -9999.000000       0.344000
53748     53748     shaanxi        109.7000       37.1833           91       159     2012      07        08        190              0.324583      26.178558       3.949405       0.231898       0.083000       0.171500       0.090100       0.376000
53748     53748     shaanxi        109.7000       37.1833           91       159     2012      07        09        191              0.323250      24.504883       0.114288       0.261960       0.067500   -9999.000000       0.095400       0.541000
53748     53748     shaanxi        109.7000       37.1833           91       159     2012      07        10        192              0.317500      27.564117       0.997863       0.246984       0.057000   -9999.000000       0.081100   -9999.000000
53748     53748     shaanxi        109.7000       37.1833           91       159     2012      07        11        193              0.302125      29.267914       0.000000       0.230432       0.062000       0.167800       0.082800       0.252000
53748     53748     shaanxi        109.7000       37.1833           91       159     2012      07        12        194              0.282333      29.139160       0.000000       0.213740       0.063000   -9999.000000   -9999.000000       0.273000
53748     53748     shaanxi        109.7000       37.1833           91       159     2012      07        13        195              0.281875      29.589844       0.498962       0.197911       0.081000   -9999.000000       0.088800       0.421000
53748     53748     shaanxi        109.7000       37.1833           91       159     2012      07        14        196              0.276625      29.615417      18.986792       0.193602       0.080000   -9999.000000       0.093300       0.727000
53748     53748     shaanxi        109.7000       37.1833           91       159     2012      07        15        197              0.267458      26.368896       0.000000       0.328022       0.063000   -9999.000000       0.091200   -9999.000000
53748     53748     shaanxi        109.7000       37.1833           91       159     2012      07        16        198              0.260500      26.766541       0.000000       0.274076       0.059000   -9999.000000       0.089300       0.288000
53748     53748     shaanxi        109.7000       37.1833           91       159     2012      07        17        199              0.254208      26.873657       0.000000       0.253232       0.068000   -9999.000000       0.090000   -9999.000000
53748     53748     shaanxi        109.7000       37.1833           91       159     2012      07        18        200              0.249125      26.204010       0.000000       0.239915       0.063000   -9999.000000   -9999.000000       0.237000
53748     53748     shaanxi        109.7000       37.1833           91       159     2012      07        19        201              0.244792      27.571899       0.000000       0.226208       0.056000   -9999.000000       0.090400   -9999.000000
53748     53748     shaanxi        109.7000       37.1833           91       159     2012      07        20        202              0.256913      28.399048      11.484425       0.214550       0.056000   -9999.000000       0.077700       0.174000
53748     53748     shaanxi        109.7000       37.1833           91       159     2012      07        21        203              0.366304      27.449432      15.005667       0.244311       0.120000       0.390300       0.122100       1.000000
53748     53748     shaanxi        109.7000       37.1833           91       159     2012      07        22        204              0.326083      22.687592       0.000000       0.327710       0.094000   -9999.000000       0.111500       0.978000
53748     53748     shaanxi        109.7000       37.1833           91       159     2012      07        23        205              0.306083      25.782013       0.026626       0.285635       0.090000       0.236900       0.100200       0.597000
53748     53748     shaanxi        109.7000       37.1833           91       159     2012      07        24        206              0.321083      25.476440       2.657016       0.273082       0.103000       0.112400   -9999.000000   -9999.000000
53748     53748     shaanxi        109.7000       37.1833           91       159     2012      07        25        207              0.304625      23.767395       0.379300       0.282098       0.089000   -9999.000000       0.097500       0.800000
53748     53748     shaanxi        109.7000       37.1833           91       159     2012      07        26        208              0.313750      26.941956      12.736370       0.276071       0.085000       0.295900       0.113300       1.000000
53748     53748     shaanxi        109.7000       37.1833           91       159     2012      07        27        209              0.332542      26.954681      35.972260       0.304209       0.096000   -9999.000000       0.104700       0.869000
53748     53748     shaanxi        109.7000       37.1833           91       159     2012      07        28        210              0.367458      26.621155       1.294673       0.351145       0.106000       0.146600       0.107000       0.979000
53748     53748     shaanxi        109.7000       37.1833           91       159     2012      07        29        211              0.338792      27.947662       4.631498       0.340850   -9999.000000       0.204400   -9999.000000   -9999.000000
53748     53748     shaanxi        109.7000       37.1833           91       159     2012      07        30        212              0.366667      28.881836      30.296928       0.326171       0.107000   -9999.000000       0.159100       1.000000
53748     53748     shaanxi        109.7000       37.1833           91       159     2012      07        31        213              0.353125      23.198639       1.979818       0.370089       0.096000       0.186900       0.141600       0.984000
53748     53748     shaanxi        109.7000       37.1833           91       159     2012      08        01        214              0.333875      24.684845       0.028525       0.340239       0.103000   -9999.000000       0.139400       0.913000
53748     53748     shaanxi        109.7000       37.1833           91       159     2012      08        02        215              0.312250      26.388916       0.000000       0.327576       0.106000       0.344000       0.118800       0.560000
53748     53748     shaanxi        109.7000       37.1833           91       159     2012      08        03        216              0.343583      27.694580       0.842252       0.314391       0.095000       0.213600       0.121800   -9999.000000
53748     53748     shaanxi        109.7000       37.1833           91       159     2012      08        04        217              0.314083      27.290009       0.000000       0.309889       0.080500   -9999.000000   -9999.000000       0.465000
53748     53748     shaanxi        109.7000       37.1833           91       159     2012      08        05        218              0.300542      27.580719       0.073803       0.299317       0.076500       0.042800       0.117400       0.550000
53748     53748     shaanxi        109.7000       37.1833           91       159     2012      08        06        219              0.285500      26.827515       0.000000       0.295210       0.085000   -9999.000000       0.125300       0.427000
53748     53748     shaanxi        109.7000       37.1833           91       159     2012      08        07        220              0.276000      27.515533       0.764894       0.287937       0.070000   -9999.000000       0.110600       0.332000
53748     53748     shaanxi        109.7000       37.1833           91       159     2012      08        08        221              0.282583      28.455109       0.254784       0.283450       0.086000   -9999.000000       0.117300   -9999.000000
53748     53748     shaanxi        109.7000       37.1833           91       159     2012      08        09        222              0.265000      27.276520       0.000000       0.276657       0.085000   -9999.000000       0.113500       0.305000
53748     53748     shaanxi        109.7000       37.1833           91       159     2012      08        10        223              0.255167      27.204468       0.000000       0.269111       0.073500       0.018300   -9999.000000       0.288000
53748     53748     shaanxi        109.7000       37.1833           91       159     2012      08        11        224              0.255750      27.486511       0.290645       0.259034       0.083000       0.028200       0.112300       0.321000
53748     53748     shaanxi        109.7000       37.1833           91       159     2012      08        12        225              0.254667      26.522095       0.337182       0.259400       0.083000   -9999.000000       0.120100       0.197000
53748     53748     shaanxi        109.7000       37.1833           91       159     2012      08        13        226              0.261250      25.556091      10.241668       0.259371       0.109000       0.030900       0.112600   -9999.000000
53748     53748     shaanxi        109.7000       37.1833           91       159     2012      08        14        227              0.340792      24.921722       2.071040       0.275938       0.109000   -9999.000000       0.132500       0.597000
53748     53748     shaanxi        109.7000       37.1833           91       159     2012      08        15        228              0.302750      24.244507       0.000000       0.304069       0.084000       0.098000   -9999.000000   -9999.000000
53748     53748     shaanxi        109.7000       37.1833           91       159     2012      08        16        229              0.295375      25.466827       1.395588       0.279590       0.085500       0.056500       0.136100       0.469000
53748     53748     shaanxi        109.7000       37.1833           91       159     2012      08        17        230              0.409250      26.034271      26.375547       0.276895   -9999.000000   -9999.000000       0.125100   -9999.000000
53748     53748     shaanxi        109.7000       37.1833           91       159     2012      08        18        231              0.392542      23.317352       3.708404       0.349259       0.124000       0.180700       0.142700       0.887000
53748     53748     shaanxi        109.7000       37.1833           91       159     2012      08        19        232              0.358208      22.853638       0.678726       0.330051       0.115000   -9999.000000       0.128700       0.769000
53748     53748     shaanxi        109.7000       37.1833           91       159     2012      08        20        233              0.340500      25.017365       0.234023       0.310018       0.109000       0.140900       0.142000       0.598000
53748     53748     shaanxi        109.7000       37.1833           91       159     2012      08        21        234              0.311917      23.735809       0.000000       0.299031       0.092000       0.211000   -9999.000000       0.497000
53748     53748     shaanxi        109.7000       37.1833           91       159     2012      08        22        235              0.295292      21.001099       0.000000       0.288128       0.089000   -9999.000000       0.129400   -9999.000000
53748     53748     shaanxi        109.7000       37.1833           91       159     2012      08        23        236              0.282417      22.159027       0.000000       0.281841       0.087000       0.091600       0.139600       0.282000
53748     53748     shaanxi        109.7000       37.1833           91       159     2012      08        24        237              0.273000      23.129456       0.000000       0.275627   -9999.000000   -9999.000000       0.125400   -9999.000000
53748     53748     shaanxi        109.7000       37.1833           91       159     2012      08        25        238              0.000000      24.108337       1.601924       0.269265   -9999.000000   -9999.000000       0.130600   -9999.000000
53748     53748     shaanxi        109.7000       37.1833           91       159     2012      08        26        239              0.263083      24.671478       0.000000       0.269520       0.089500       0.111800       0.135600       0.253000
53748     53748     shaanxi        109.7000       37.1833           91       159     2012      08        27        240              0.276875      24.339020       3.131345       0.269911       0.077500   -9999.000000       0.136800   -9999.000000
53748     53748     shaanxi        109.7000       37.1833           91       159     2012      08        28        241              0.274375      23.093323       0.000000       0.279831       0.090000       0.218500       0.111300       0.557000
53748     53748     shaanxi        109.7000       37.1833           91       159     2012      08        29        242              0.258375      24.537933       0.000000       0.267608       0.098000   -9999.000000       0.117900       0.331000
53748     53748     shaanxi        109.7000       37.1833           91       159     2012      08        30        243              0.250292      25.052948       2.865594       0.255292       0.091000       0.121700       0.105400       0.341000
53748     53748     shaanxi        109.7000       37.1833           91       159     2012      08        31        244              0.291208      24.947296      27.681837       0.253991       0.080000       0.040000       0.122900       0.516000
53748     53748     shaanxi        109.7000       37.1833           91       159     2012      09        01        245              0.416000      21.898987      28.003323       0.314870       0.131000       0.134000   -9999.000000   -9999.000000
53748     53748     shaanxi        109.7000       37.1833           91       159     2012      09        02        246              0.369667      16.934082       0.085485       0.370718       0.128000       0.151800       0.141300       0.921000
53748     53748     shaanxi        109.7000       37.1833           91       159     2012      09        03        247              0.339458      19.808228       0.000000       0.333130       0.106000       0.175700       0.124600       0.705000
53748     53748     shaanxi        109.7000       37.1833           91       159     2012      09        04        248              0.319125      19.271423       5.455592       0.320196       0.117000       0.276600       0.105600       0.740000
53748     53748     shaanxi        109.7000       37.1833           91       159     2012      09        05        249              0.315000      20.385101       5.094770       0.319383   -9999.000000       0.227100       0.113400       0.571000
53748     53748     shaanxi        109.7000       37.1833           91       159     2012      09        06        250              0.377042      21.418640      10.928427       0.328780       0.133000   -9999.000000       0.134600   -9999.000000
53748     53748     shaanxi        109.7000       37.1833           91       159     2012      09        07        251              0.352458      20.113800       0.217215       0.347509       0.130000       0.384300   -9999.000000       0.922000
53748     53748     shaanxi        109.7000       37.1833           91       159     2012      09        08        252              0.334792      20.827301       1.484497       0.325925       0.110000       0.220400       0.114200       0.720000
53748     53748     shaanxi        109.7000       37.1833           91       159     2012      09        09        253              0.319625      21.923096       0.274581       0.320688       0.121000   -9999.000000       0.125400       0.595000
53748     53748     shaanxi        109.7000       37.1833           91       159     2012      09        10        254              0.359167      21.934021      11.914063       0.314026       0.129000       0.102500       0.108700       0.896000
53748     53748     shaanxi        109.7000       37.1833           91       159     2012      09        11        255              0.349292      18.128723       1.006795       0.342311       0.117500   -9999.000000       0.115700   -9999.000000
53748     53748     shaanxi        109.7000       37.1833           91       159     2012      09        12        256              0.326500      18.214966       0.000000       0.326710       0.113000       0.165300   -9999.000000       0.757000
53748     53748     shaanxi        109.7000       37.1833           91       159     2012      09        13        257              0.308500      15.088715       0.052804       0.316218       0.092000       0.128800       0.102600   -9999.000000
53748     53748     shaanxi        109.7000       37.1833           91       159     2012      09        14        258              0.294083      15.729980       0.000000       0.309901       0.088000   -9999.000000       0.093100       0.353000
53748     53748     shaanxi        109.7000       37.1833           91       159     2012      09        15        259              0.281833      17.243713       1.300498       0.304149       0.104000       0.139700       0.102100   -9999.000000
53748     53748     shaanxi        109.7000       37.1833           91       159     2012      09        16        260              0.276042      18.463989       0.976632       0.301502       0.099500   -9999.000000       0.092100       0.412000
53748     53748     shaanxi        109.7000       37.1833           91       159     2012      09        17        261              0.316250      16.660583      12.651105       0.304133       0.094500   -9999.000000       0.096000       0.942000
53748     53748     shaanxi        109.7000       37.1833           91       159     2012      09        18        262              0.334500      17.709137       0.000000       0.330635       0.094000       0.239500   -9999.000000       0.759000
53748     53748     shaanxi        109.7000       37.1833           91       159     2012      09        19        263              0.317542      18.651428       0.000000       0.319054       0.081000   -9999.000000       0.101200       0.489000
53748     53748     shaanxi        109.7000       37.1833           91       159     2012      09        20        264              0.325042      19.648499       3.026261       0.308288       0.121000       0.094400       0.120900   -9999.000000
53748     53748     shaanxi        109.7000       37.1833           91       159     2012      09        21        265              0.328250      18.579987       0.000000       0.312128   -9999.000000       0.253400       0.103400       0.752000
53748     53748     shaanxi        109.7000       37.1833           91       159     2012      09        22        266              0.307208      17.648926       1.614224       0.309512       0.083000   -9999.000000       0.106800       0.539000
53748     53748     shaanxi        109.7000       37.1833           91       159     2012      09        23        267              0.294125      18.744446       0.000000       0.301637       0.080000       0.202800       0.102100       0.434000
53748     53748     shaanxi        109.7000       37.1833           91       159     2012      09        24        268              0.305750      19.337280      17.733614       0.296762       0.089000   -9999.000000   -9999.000000       0.702000
53748     53748     shaanxi        109.7000       37.1833           91       159     2012      09        25        269              0.376875      18.370789       8.382044       0.326866   -9999.000000   -9999.000000       0.112100   -9999.000000
53748     53748     shaanxi        109.7000       37.1833           91       159     2012      09        26        270              0.354250      14.107849       0.551217       0.349076       0.107000       0.208100       0.122200       0.943000
53748     53748     shaanxi        109.7000       37.1833           91       159     2012      09        27        271              0.334286      16.731873       0.030003       0.326802       0.100500   -9999.000000       0.107100       0.721000
53748     53748     shaanxi        109.7000       37.1833           91       159     2012      09        28        272              0.308067      14.227020       0.255842       0.316198       0.089000   -9999.000000       0.116300       0.649000
53748     53748     shaanxi        109.7000       37.1833           91       159     2012      09        29        273              0.300583      13.253296       0.176052       0.310862       0.088000   -9999.000000   -9999.000000       0.414000
53748     53748     shaanxi        109.7000       37.1833           91       159     2012      09        30        274              0.289708      13.544220       0.076020       0.307152       0.084000       0.126400       0.106300   -9999.000000
53748     53748     shaanxi        109.7000       37.1833           91       159     2012      10        01        275              0.281167      14.204590       0.000000       0.302994       0.087000   -9999.000000       0.087000       0.411000
53748     53748     shaanxi        109.7000       37.1833           91       159     2012      10        02        276              0.280292      16.440857       1.668128       0.299858       0.080000   -9999.000000       0.095000       0.473000
53748     53748     shaanxi        109.7000       37.1833           91       159     2012      10        03        277              0.273458      16.904968       0.000000       0.297876       0.072500   -9999.000000       0.082400       0.444000
53748     53748     shaanxi        109.7000       37.1833           91       159     2012      10        04        278              0.301208      16.679016       1.447273       0.293566       0.098000   -9999.000000       0.106700       0.674000
53748     53748     shaanxi        109.7000       37.1833           91       159     2012      10        05        279              0.287083      14.183014       0.201327       0.300786       0.079000   -9999.000000   -9999.000000   -9999.000000
53748     53748     shaanxi        109.7000       37.1833           91       159     2012      10        06        280              0.273625      14.350403       0.000000       0.295222       0.094000       0.086100       0.091200       0.490000
53748     53748     shaanxi        109.7000       37.1833           91       159     2012      10        07        281              0.275625      15.448242       0.108200       0.291535       0.092000   -9999.000000       0.107800       0.506000
53748     53748     shaanxi        109.7000       37.1833           91       159     2012      10        08        282              0.276083      13.751953       0.604476       0.293494       0.077500       0.168700       0.080800       0.652000
53748     53748     shaanxi        109.7000       37.1833           91       159     2012      10        09        283              0.266708      14.160736       0.378387       0.294398       0.075500       0.131900       0.088900       0.270000
53748     53748     shaanxi        109.7000       37.1833           91       159     2012      10        10        284              0.257333      12.584625       0.280826       0.289669       0.072000   -9999.000000       0.084900   -9999.000000
53748     53748     shaanxi        109.7000       37.1833           91       159     2012      10        11        285              0.252125      13.435577       0.000000       0.287457       0.067000       0.112700       0.088900       0.372000
53748     53748     shaanxi        109.7000       37.1833           91       159     2012      10        12        286              0.246083      14.638245       0.000000       0.284912       0.071000   -9999.000000       0.073500   -9999.000000
53748     53748     shaanxi        109.7000       37.1833           91       159     2012      10        13        287              0.239833      13.982025       0.065165       0.281203       0.069000   -9999.000000       0.087600       0.202000
53748     53748     shaanxi        109.7000       37.1833           91       159     2012      10        14        288              0.246333      13.395599       0.721092       0.278782       0.065500       0.099100       0.082800   -9999.000000
53748     53748     shaanxi        109.7000       37.1833           91       159     2012      10        15        289              0.269542      13.727081       0.727410       0.282660       0.079000   -9999.000000       0.090600       0.692000
53748     53748     shaanxi        109.7000       37.1833           91       159     2012      10        16        290              0.272750      12.257355       0.945786       0.286657       0.070000       0.166600   -9999.000000       0.573000
53748     53748     shaanxi        109.7000       37.1833           91       159     2012      10        17        291              0.253792       8.603271       0.095911       0.281109   -9999.000000   -9999.000000       0.080100       0.401000
53748     53748     shaanxi        109.7000       37.1833           91       159     2012      10        18        292              0.246708       9.411072       0.463801       0.278702   -9999.000000       0.140400       0.078700       0.259000
53748     53748     shaanxi        109.7000       37.1833           91       159     2012      10        19        293              0.242042       7.974182       0.000000       0.280562       0.069500       0.262500       0.085200   -9999.000000
53748     53748     shaanxi        109.7000       37.1833           91       159     2012      10        20        294              0.236375      11.412842       0.000000       0.277932       0.067500   -9999.000000       0.073700       0.313000
53748     53748     shaanxi        109.7000       37.1833           91       159     2012      10        21        295              0.244708      14.134491       0.387724       0.276135       0.090000       0.104600       0.094000       0.718000
53748     53748     shaanxi        109.7000       37.1833           91       159     2012      10        22        296              0.244083       6.902191       0.058235       0.279829   -9999.000000   -9999.000000   -9999.000000       0.659000
53748     53748     shaanxi        109.7000       37.1833           91       159     2012      10        23        297              0.236167       7.950378       0.000000       0.276554   -9999.000000   -9999.000000       0.072400       0.248000
53748     53748     shaanxi        109.7000       37.1833           91       159     2012      10        24        298              0.230667       8.980835       0.000000       0.275766   -9999.000000   -9999.000000       0.080700   -9999.000000
53748     53748     shaanxi        109.7000       37.1833           91       159     2012      10        25        299              0.000000       9.651398       0.252409       0.273230       0.066500       0.148600       0.067600       0.172000
53748     53748     shaanxi        109.7000       37.1833           91       159     2012      10        26        300              0.221167      10.211670       0.075277       0.271625       0.068000       0.031900       0.078400       0.287000
53748     53748     shaanxi        109.7000       37.1833           91       159     2012      10        27        301              0.218917       8.317383       0.000000       0.273595       0.068000       0.044500   -9999.000000       0.263000
53748     53748     shaanxi        109.7000       37.1833           91       159     2012      10        28        302              0.000000       9.950623       0.065110       0.271566       0.075000       0.356100       0.079500       0.173000
53748     53748     shaanxi        109.7000       37.1833           91       159     2012      10        29        303              0.210542      11.455017       0.278027       0.271266   -9999.000000       0.038200       0.056300   -9999.000000
53748     53748     shaanxi        109.7000       37.1833           91       159     2012      10        30        304              0.206333       7.991516       0.000000       0.265582       0.061000   -9999.000000       0.069200       0.073000
53748     53748     shaanxi        109.7000       37.1833           91       159     2012      10        31        305              0.204125       6.569489       0.000000       0.266099       0.064000   -9999.000000       0.060800       0.150000
53748     53748     shaanxi        109.7000       37.1833           91       159     2012      11        01        306              0.202500       6.857635       0.022001       0.263141       0.068000       0.063800       0.068300       0.147000
53748     53748     shaanxi        109.7000       37.1833           91       159     2012      11        02        307              0.211083       7.462585       1.672829       0.265396   -9999.000000   -9999.000000   -9999.000000       0.745000
53748     53748     shaanxi        109.7000       37.1833           91       159     2012      11        03        308              0.208583       9.115845       0.099597       0.272103   -9999.000000       0.109800       0.065800   -9999.000000
53748     53748     shaanxi        109.7000       37.1833           91       159     2012      11        04        309              0.195208       1.598907       0.000000       0.234229       0.075000   -9999.000000       0.069700       0.147000
53748     53748     shaanxi        109.7000       37.1833           91       159     2012      11        05        310              0.195333       0.470337       0.000000       0.211729       0.073000   -9999.000000       0.060200       0.056000
53748     53748     shaanxi        109.7000       37.1833           91       159     2012      11        06        311              0.208167       1.324219       0.000000       0.218243       0.080000       0.053600       0.065500       0.177000
53748     53748     shaanxi        109.7000       37.1833           91       159     2012      11        07        312              0.206167       3.717102       0.761381       0.251806       0.077000   -9999.000000       0.070800       0.060000
53748     53748     shaanxi        109.7000       37.1833           91       159     2012      11        08        313              0.208167       3.204254       0.000000       0.247880       0.073000       0.059200   -9999.000000   -9999.000000
53748     53748     shaanxi        109.7000       37.1833           91       159     2012      11        09        314              0.251208       5.384735       0.232221       0.264249   -9999.000000   -9999.000000       0.072500       0.823000
53748     53748     shaanxi        109.7000       37.1833           91       159     2012      11        10        315              0.253792       3.871063       0.145418       0.270685       0.094000   -9999.000000       0.068900   -9999.000000
53748     53748     shaanxi        109.7000       37.1833           91       159     2012      11        11        316              0.222167       1.702972       0.000000       0.233795       0.087000       0.086000       0.067900       0.134000
53748     53748     shaanxi        109.7000       37.1833           91       159     2012      11        12        317              0.222500       1.396393       0.000000       0.221099       0.082000   -9999.000000       0.073200   -9999.000000
53748     53748     shaanxi        109.7000       37.1833           91       159     2012      11        13        318              0.000000       2.268402       0.000000       0.231328   -9999.000000       0.044000   -9999.000000       0.309000
53748     53748     shaanxi        109.7000       37.1833           91       159     2012      11        14        319              0.222167       2.123718       0.000000       0.228646   -9999.000000       0.040100       0.064000       0.193000
53748     53748     shaanxi        109.7000       37.1833           91       159     2012      11        15        320              0.236667       3.343689       0.316258       0.243872   -9999.000000   -9999.000000       0.049800       0.218000
53748     53748     shaanxi        109.7000       37.1833           91       159     2012      11        16        321              0.232542       0.613800       0.185699       0.225958       0.080000       0.053900       0.061000       0.223000
53748     53748     shaanxi        109.7000       37.1833           91       159     2012      11        17        322              0.000000       1.132599       0.000000       0.220478       0.088000       0.106400       0.067800   -9999.000000
53748     53748     shaanxi        109.7000       37.1833           91       159     2012      11        18        323              0.223833       2.941406       0.000000       0.243103       0.083000   -9999.000000       0.069800       0.412000
53748     53748     shaanxi        109.7000       37.1833           91       159     2012      11        19        324              0.229000       2.892822       0.000000       0.240181   -9999.000000       0.052200   -9999.000000       0.314000
53748     53748     shaanxi        109.7000       37.1833           91       159     2012      11        20        325              0.234667       3.199463       0.000000       0.251514       0.089000   -9999.000000       0.062100       0.384000
53748     53748     shaanxi        109.7000       37.1833           91       159     2012      11        21        326              0.230833       3.249298       0.110493       0.267246       0.075000       0.142600       0.068100       0.283000
53748     53748     shaanxi        109.7000       37.1833           91       159     2012      11        22        327              0.217167       5.398468       3.291568       0.269458       0.077000   -9999.000000       0.054900   -9999.000000
53748     53748     shaanxi        109.7000       37.1833           91       159     2012      11        23        328              0.196333       1.645172       0.000000       0.239827       0.069000   -9999.000000       0.059900       0.110000
53748     53748     shaanxi        109.7000       37.1833           91       159     2012      11        24        329              0.209583       0.555145       0.994681       0.211062   -9999.000000       0.051100       0.061900       0.149000
53748     53748     shaanxi        109.7000       37.1833           91       159     2012      11        25        330              0.196792       1.583649       4.961076       0.230471   -9999.000000   -9999.000000       0.056900       0.053000
53748     53748     shaanxi        109.7000       37.1833           91       159     2012      11        26        331              0.181625       0.178070       0.861844       0.209581       0.065000       0.028800   -9999.000000   -9999.000000
53748     53748     shaanxi        109.7000       37.1833           91       159     2012      11        27        332              0.187708      -0.034210       0.000000       0.198979       0.062000   -9999.000000       0.052300   -9999.000000
53748     53748     shaanxi        109.7000       37.1833           91       159     2012      11        28        333              0.172250       0.682281       0.000000       0.210050       0.063000       0.155400       0.045800   -9999.000000
53748     53748     shaanxi        109.7000       37.1833           91       159     2012      11        29        334              0.172708      -1.959991       0.000000       0.176161   -9999.000000       0.018300       0.051700   -9999.000000
53748     53748     shaanxi        109.7000       37.1833           91       159     2012      11        30        335              0.184792      -1.192535       0.000000       0.184753   -9999.000000   -9999.000000   -9999.000000   -9999.000000
53748     53748     shaanxi        109.7000       37.1833           91       159     2012      12        01        336              0.183583       0.032349       0.129170       0.194051       0.062000       0.093600       0.050900   -9999.000000
53748     53748     shaanxi        109.7000       37.1833           91       159     2012      12        02        337              0.181458       0.079498       0.000000       0.201410       0.065000       0.051600       0.047000   -9999.000000
53748     53748     shaanxi        109.7000       37.1833           91       159     2012      12        03        338              0.170125      -0.532928       0.000000       0.192177       0.067000       0.056300       0.052900   -9999.000000
53748     53748     shaanxi        109.7000       37.1833           91       159     2012      12        04        339              0.176958      -1.630096       0.000000       0.179733       0.065000   -9999.000000       0.047600   -9999.000000
53748     53748     shaanxi        109.7000       37.1833           91       159     2012      12        05        340              0.163583      -0.723969       0.000000       0.189857   -9999.000000   -9999.000000       0.048500   -9999.000000
53748     53748     shaanxi        109.7000       37.1833           91       159     2012      12        06        341              0.171250      -2.544861       0.000000       0.169629   -9999.000000       0.043700   -9999.000000   -9999.000000
53748     53748     shaanxi        109.7000       37.1833           91       159     2012      12        07        342              0.160792      -1.155579       0.000000       0.185334       0.063000       0.028000       0.043700   -9999.000000
53748     53748     shaanxi        109.7000       37.1833           91       159     2012      12        08        343              0.151667      -3.043457       0.000000       0.168290       0.069000       0.170900       0.052500   -9999.000000
53748     53748     shaanxi        109.7000       37.1833           91       159     2012      12        09        344              0.154750      -4.624634       0.000000       0.150326       0.066000   -9999.000000       0.044400   -9999.000000
53748     53748     shaanxi        109.7000       37.1833           91       159     2012      12        10        345              0.155167      -3.060791       0.050357       0.164690   -9999.000000   -9999.000000       0.051000   -9999.000000
53748     53748     shaanxi        109.7000       37.1833           91       159     2012      12        11        346              0.154292      -2.481171       0.000000       0.174881   -9999.000000   -9999.000000       0.050500   -9999.000000
53748     53748     shaanxi        109.7000       37.1833           91       159     2012      12        12        347              0.160625      -1.493256       0.000000       0.178116       0.060000   -9999.000000       0.057900   -9999.000000
53748     53748     shaanxi        109.7000       37.1833           91       159     2012      12        13        348              0.161125      -0.372284       0.000000       0.188910   -9999.000000       0.233800       0.047500       0.014000
53748     53748     shaanxi        109.7000       37.1833           91       159     2012      12        14        349              0.165542      -0.628906       0.000000       0.183811       0.062000       0.071100       0.057300       0.046000
53748     53748     shaanxi        109.7000       37.1833           91       159     2012      12        15        350              0.000000       0.455414       0.199979       0.201764   -9999.000000   -9999.000000       0.052600       0.026000
53748     53748     shaanxi        109.7000       37.1833           91       159     2012      12        16        351              0.164708      -0.512726       0.000000       0.183625   -9999.000000   -9999.000000       0.053800   -9999.000000
53748     53748     shaanxi        109.7000       37.1833           91       159     2012      12        17        352              0.149708      -1.008484       0.000000       0.180504       0.061000       0.131600   -9999.000000   -9999.000000
53748     53748     shaanxi        109.7000       37.1833           91       159     2012      12        18        353              0.149583      -3.334351       0.042586       0.158562       0.060000   -9999.000000       0.048900   -9999.000000
53748     53748     shaanxi        109.7000       37.1833           91       159     2012      12        19        354              0.147583      -3.145813       0.000000       0.160475   -9999.000000   -9999.000000       0.052100   -9999.000000
53748     53748     shaanxi        109.7000       37.1833           91       159     2012      12        20        355              0.000000      -2.578827       0.228847       0.156568   -9999.000000   -9999.000000   -9999.000000   -9999.000000
53748     53748     shaanxi        109.7000       37.1833           91       159     2012      12        21        356              0.141958      -3.805298       1.417837       0.148640   -9999.000000       0.178600       0.045900   -9999.000000
53748     53748     shaanxi        109.7000       37.1833           91       159     2012      12        22        357              0.134583      -6.450592       0.000000       0.133711   -9999.000000       0.007700       0.045500   -9999.000000
53748     53748     shaanxi        109.7000       37.1833           91       159     2012      12        23        358              0.130333      -9.910400       0.000000       0.126402   -9999.000000   -9999.000000   -9999.000000   -9999.000000
53748     53748     shaanxi        109.7000       37.1833           91       159     2012      12        24        359              0.130833     -10.157745       0.000000       0.123932       0.065000   -9999.000000       0.042400   -9999.000000
53748     53748     shaanxi        109.7000       37.1833           91       159     2012      12        25        360              0.136375      -7.962189       0.000000       0.126431   -9999.000000   -9999.000000       0.051500   -9999.000000
53748     53748     shaanxi        109.7000       37.1833           91       159     2012      12        26        361              0.000000      -7.291992       0.000000       0.125821   -9999.000000       0.304700       0.046600   -9999.000000
53748     53748     shaanxi        109.7000       37.1833           91       159     2012      12        27        362              0.140545      -5.978394       0.000000       0.137863   -9999.000000   -9999.000000       0.050700   -9999.000000
53748     53748     shaanxi        109.7000       37.1833           91       159     2012      12        28        363              0.000000      -4.409119       0.000000       0.147869   -9999.000000   -9999.000000   -9999.000000   -9999.000000
53748     53748     shaanxi        109.7000       37.1833           91       159     2012      12        29        364              0.000000      -6.797333       0.000000       0.132310   -9999.000000   -9999.000000       0.049000   -9999.000000
53748     53748     shaanxi        109.7000       37.1833           91       159     2012      12        30        365              0.000000      -9.297058       0.000000       0.126086       0.065000   -9999.000000       0.044000   -9999.000000
53748     53748     shaanxi        109.7000       37.1833           91       159     2012      12        31        366              0.127733      -7.473480       0.000000       0.127206   -9999.000000   -9999.000000       0.051700   -9999.000000
