# Supplementary material for: Research on Fusing Multisatellite Soil Moisture Data Based on Bayesian Model Averaging
Source: Hindawi journal article supplement (doi:10.1155/2018/9310838), 2018-06-25
Supplement: f1 [file 9310838.f1.zip › 2012_sm00-10cm_daily_ZDB_ZHY_53754_366days_allin.txt]

53754     53754     shaanxi        110.2167       37.5000           90       161     2012      01        01        001              0.000000   -9999.000000       0.000000   -9999.000000   -9999.000000   -9999.000000       0.035700   -9999.000000
53754     53754     shaanxi        110.2167       37.5000           90       161     2012      01        02        002              0.073583      -4.561462       0.000000       0.156530   -9999.000000   -9999.000000       0.034900       0.015000
53754     53754     shaanxi        110.2167       37.5000           90       161     2012      01        03        003              0.000000      -5.808563       0.000000       0.146573   -9999.000000       0.063500       0.041200   -9999.000000
53754     53754     shaanxi        110.2167       37.5000           90       161     2012      01        04        004              0.071435      -8.069031       0.000000       0.137069   -9999.000000       0.151300       0.030700       0.013000
53754     53754     shaanxi        110.2167       37.5000           90       161     2012      01        05        005              0.071917      -8.478821       0.000000       0.136390   -9999.000000   -9999.000000       0.039800       0.031000
53754     53754     shaanxi        110.2167       37.5000           90       161     2012      01        06        006              0.073167      -7.265686       0.000000       0.141909   -9999.000000   -9999.000000       0.035100       0.007000
53754     53754     shaanxi        110.2167       37.5000           90       161     2012      01        07        007              0.074500      -5.052521       0.000000       0.153689   -9999.000000   -9999.000000       0.037200       0.007000
53754     53754     shaanxi        110.2167       37.5000           90       161     2012      01        08        008              0.000000      -4.462433       0.000000       0.156158   -9999.000000       0.027700   -9999.000000   -9999.000000
53754     53754     shaanxi        110.2167       37.5000           90       161     2012      01        09        009              0.074042      -4.965454       0.000000       0.157759   -9999.000000       0.097800   -9999.000000       0.005000
53754     53754     shaanxi        110.2167       37.5000           90       161     2012      01        10        010              0.073542      -4.517731       0.000000       0.162560   -9999.000000   -9999.000000       0.038800       0.002000
53754     53754     shaanxi        110.2167       37.5000           90       161     2012      01        11        011              0.073000      -5.204254       0.000000       0.157043   -9999.000000   -9999.000000       0.030900       0.018000
53754     53754     shaanxi        110.2167       37.5000           90       161     2012      01        12        012              0.073643      -5.903229       0.000000       0.153617       0.056000       0.148400       0.035600       0.010000
53754     53754     shaanxi        110.2167       37.5000           90       161     2012      01        13        013              0.074778      -5.564606       0.000000       0.155470   -9999.000000   -9999.000000       0.035000   -9999.000000
53754     53754     shaanxi        110.2167       37.5000           90       161     2012      01        14        014              0.073952      -4.839844       0.000000       0.156587   -9999.000000       0.034000   -9999.000000       0.001000
53754     53754     shaanxi        110.2167       37.5000           90       161     2012      01        15        015              0.074708      -4.789490       0.000000       0.157427   -9999.000000   -9999.000000       0.032900       0.040000
53754     53754     shaanxi        110.2167       37.5000           90       161     2012      01        16        016              0.075000      -3.921661       0.000000       0.166526       0.059000   -9999.000000       0.034600       0.004000
53754     53754     shaanxi        110.2167       37.5000           90       161     2012      01        17        017              0.000000      -3.688416       0.000000       0.170415       0.055000       0.199600       0.029100   -9999.000000
53754     53754     shaanxi        110.2167       37.5000           90       161     2012      01        18        018              0.075917      -3.225006       0.000000       0.173737       0.062000       0.034400       0.032600   -9999.000000
53754     53754     shaanxi        110.2167       37.5000           90       161     2012      01        19        019              0.076458      -3.002472       0.000000       0.178095   -9999.000000   -9999.000000   -9999.000000       0.029000
53754     53754     shaanxi        110.2167       37.5000           90       161     2012      01        20        020              0.076250      -1.887238       0.000000       0.182912   -9999.000000       0.021800       0.034800   -9999.000000
53754     53754     shaanxi        110.2167       37.5000           90       161     2012      01        21        021              0.073958      -4.203979       0.000000       0.156836   -9999.000000   -9999.000000       0.025200   -9999.000000
53754     53754     shaanxi        110.2167       37.5000           90       161     2012      01        22        022              0.072292      -7.825928       0.000000       0.140055   -9999.000000   -9999.000000       0.032900   -9999.000000
53754     53754     shaanxi        110.2167       37.5000           90       161     2012      01        23        023              0.071542      -9.591858       0.000000       0.135030   -9999.000000   -9999.000000       0.031200   -9999.000000
53754     53754     shaanxi        110.2167       37.5000           90       161     2012      01        24        024              0.071125      -8.854431       0.000000       0.133204   -9999.000000   -9999.000000   -9999.000000   -9999.000000
53754     53754     shaanxi        110.2167       37.5000           90       161     2012      01        25        025              0.071125      -8.803955       0.088834       0.135533   -9999.000000   -9999.000000   -9999.000000   -9999.000000
53754     53754     shaanxi        110.2167       37.5000           90       161     2012      01        26        026              0.072500      -7.470001       0.000000       0.143650   -9999.000000   -9999.000000       0.034900       0.001000
53754     53754     shaanxi        110.2167       37.5000           90       161     2012      01        27        027              0.074250      -5.574677       0.000000       0.156233       0.064000       0.029000       0.038000   -9999.000000
53754     53754     shaanxi        110.2167       37.5000           90       161     2012      01        28        028              0.075375      -4.023407       0.000000       0.165565       0.061000   -9999.000000       0.030000       0.010000
53754     53754     shaanxi        110.2167       37.5000           90       161     2012      01        29        029              0.076292      -3.448395       0.000000       0.174739   -9999.000000   -9999.000000       0.033000       0.020000
53754     53754     shaanxi        110.2167       37.5000           90       161     2012      01        30        030              0.077042      -3.497467       0.000000       0.175502   -9999.000000       0.192500       0.036300       0.051000
53754     53754     shaanxi        110.2167       37.5000           90       161     2012      01        31        031              0.078458      -2.449371       0.000000       0.184187   -9999.000000   -9999.000000   -9999.000000       0.034000
53754     53754     shaanxi        110.2167       37.5000           90       161     2012      02        01        032              0.075000      -1.035156       0.000000       0.195922       0.050000       0.042200       0.029200   -9999.000000
53754     53754     shaanxi        110.2167       37.5000           90       161     2012      02        02        033              0.074125      -5.270569       0.000000       0.158305       0.058000       0.068800       0.039400   -9999.000000
53754     53754     shaanxi        110.2167       37.5000           90       161     2012      02        03        034              0.075542      -6.157227       0.000000       0.151625       0.060000   -9999.000000       0.032300       0.002000
53754     53754     shaanxi        110.2167       37.5000           90       161     2012      02        04        035              0.078292      -3.817352       0.000000       0.168004   -9999.000000   -9999.000000       0.037700       0.023000
53754     53754     shaanxi        110.2167       37.5000           90       161     2012      02        05        036              0.080458      -1.644318       0.000000       0.188303   -9999.000000       0.008800   -9999.000000       0.024000
53754     53754     shaanxi        110.2167       37.5000           90       161     2012      02        06        037              0.074958      -1.051788       0.000000       0.194319   -9999.000000   -9999.000000       0.038200   -9999.000000
53754     53754     shaanxi        110.2167       37.5000           90       161     2012      02        07        038              0.073458      -6.341492       0.000000       0.152066       0.058000   -9999.000000       0.031100   -9999.000000
53754     53754     shaanxi        110.2167       37.5000           90       161     2012      02        08        039              0.072167      -6.633087       0.119132       0.143668   -9999.000000   -9999.000000       0.043500   -9999.000000
53754     53754     shaanxi        110.2167       37.5000           90       161     2012      02        09        040              0.072875      -7.810394       0.000000       0.136398   -9999.000000       0.130900       0.037000       0.009000
53754     53754     shaanxi        110.2167       37.5000           90       161     2012      02        10        041              0.074292      -6.549713       0.000000       0.145626   -9999.000000   -9999.000000       0.038000   -9999.000000
53754     53754     shaanxi        110.2167       37.5000           90       161     2012      02        11        042              0.077292      -5.038605       0.000000       0.162451   -9999.000000   -9999.000000   -9999.000000   -9999.000000
53754     53754     shaanxi        110.2167       37.5000           90       161     2012      02        12        043              0.078000      -1.755066       0.000000       0.184443   -9999.000000   -9999.000000   -9999.000000       0.019000
53754     53754     shaanxi        110.2167       37.5000           90       161     2012      02        13        044              0.079875      -1.532806       0.000000       0.185962       0.065000       0.044800   -9999.000000       0.088000
53754     53754     shaanxi        110.2167       37.5000           90       161     2012      02        14        045              0.080958      -0.736145       0.000000       0.198639       0.062000   -9999.000000   -9999.000000       0.066000
53754     53754     shaanxi        110.2167       37.5000           90       161     2012      02        15        046              0.082958      -0.307159       0.000000       0.199624   -9999.000000   -9999.000000       0.041700   -9999.000000
53754     53754     shaanxi        110.2167       37.5000           90       161     2012      02        16        047              0.078833      -0.669312       0.000000       0.199988   -9999.000000   -9999.000000       0.041100   -9999.000000
53754     53754     shaanxi        110.2167       37.5000           90       161     2012      02        17        048              0.076542      -3.032745       0.000000       0.180816       0.052000   -9999.000000   -9999.000000       0.048000
53754     53754     shaanxi        110.2167       37.5000           90       161     2012      02        18        049              0.077250      -4.211853       4.540356       0.170508       0.053000   -9999.000000       0.033900       0.033000
53754     53754     shaanxi        110.2167       37.5000           90       161     2012      02        19        050              0.079708      -4.031555       0.000000       0.173682       0.060000   -9999.000000       0.047500       0.017000
53754     53754     shaanxi        110.2167       37.5000           90       161     2012      02        20        051              0.089625      -1.418732       0.000000       0.188270   -9999.000000       0.076900       0.041700   -9999.000000
53754     53754     shaanxi        110.2167       37.5000           90       161     2012      02        21        052              0.110625       1.375336       0.000000       0.212208   -9999.000000   -9999.000000   -9999.000000   -9999.000000
53754     53754     shaanxi        110.2167       37.5000           90       161     2012      02        22        053              0.144750       3.165161       0.000000       0.229818       0.061000   -9999.000000   -9999.000000       0.127000
53754     53754     shaanxi        110.2167       37.5000           90       161     2012      02        23        054              0.146083       4.269501       0.000000       0.237251       0.057000       0.010600       0.045100       0.195000
53754     53754     shaanxi        110.2167       37.5000           90       161     2012      02        24        055              0.140958       3.234558       0.000000       0.236810       0.073000   -9999.000000       0.039300       0.200000
53754     53754     shaanxi        110.2167       37.5000           90       161     2012      02        25        056              0.093708       1.817963       0.000000       0.223683   -9999.000000   -9999.000000       0.049200       0.096000
53754     53754     shaanxi        110.2167       37.5000           90       161     2012      02        26        057              0.100042      -1.102234       0.239735       0.191699   -9999.000000       0.013400       0.042100       0.052000
53754     53754     shaanxi        110.2167       37.5000           90       161     2012      02        27        058              0.107167       0.992310       0.000000       0.208366       0.065000   -9999.000000   -9999.000000       0.120000
53754     53754     shaanxi        110.2167       37.5000           90       161     2012      02        28        059              0.114792       2.774933       0.000000       0.228223       0.057000       0.021900   -9999.000000       0.159000
53754     53754     shaanxi        110.2167       37.5000           90       161     2012      02        29        060              0.000000   -9999.000000       0.000000   -9999.000000       0.066000   -9999.000000   -9999.000000   -9999.000000
53754     53754     shaanxi        110.2167       37.5000           90       161     2012      03        01        061              0.134000       3.302673       0.000000       0.236049       0.070000   -9999.000000       0.048800   -9999.000000
53754     53754     shaanxi        110.2167       37.5000           90       161     2012      03        02        062              0.135792       3.287231       0.000000       0.241714   -9999.000000       0.045500       0.040000       0.222000
53754     53754     shaanxi        110.2167       37.5000           90       161     2012      03        03        063              0.137792       2.715271       0.347379       0.249294   -9999.000000   -9999.000000       0.058300       0.388000
53754     53754     shaanxi        110.2167       37.5000           90       161     2012      03        04        064              0.140417       2.319977       0.000000       0.244126       0.077000       0.043100       0.053500       0.389000
53754     53754     shaanxi        110.2167       37.5000           90       161     2012      03        05        065              0.135750       3.014679       0.567073       0.249059       0.074000   -9999.000000       0.052400       0.131000
53754     53754     shaanxi        110.2167       37.5000           90       161     2012      03        06        066              0.118792       2.032959       0.000000       0.227930       0.070000   -9999.000000       0.037000   -9999.000000
53754     53754     shaanxi        110.2167       37.5000           90       161     2012      03        07        067              0.000000       0.995789       0.000000       0.212595   -9999.000000       0.006500       0.051400       0.195000
53754     53754     shaanxi        110.2167       37.5000           90       161     2012      03        08        068              0.139500       3.520721       0.000000       0.231492   -9999.000000   -9999.000000       0.044300       0.238000
53754     53754     shaanxi        110.2167       37.5000           90       161     2012      03        09        069              0.139542       3.254211       0.630692       0.235484       0.056000   -9999.000000       0.056400       0.469000
53754     53754     shaanxi        110.2167       37.5000           90       161     2012      03        10        070              0.136375       3.718170       0.000000       0.241383       0.059000   -9999.000000   -9999.000000       0.104000
53754     53754     shaanxi        110.2167       37.5000           90       161     2012      03        11        071              0.135958       4.112244       0.000000       0.230557       0.062000   -9999.000000       0.045200   -9999.000000
53754     53754     shaanxi        110.2167       37.5000           90       161     2012      03        12        072              0.139917       4.010010       0.000000       0.234082   -9999.000000       0.016100       0.037200       0.172000
53754     53754     shaanxi        110.2167       37.5000           90       161     2012      03        13        073              0.137583       5.399963       0.000000       0.233272   -9999.000000   -9999.000000       0.049200       0.170000
53754     53754     shaanxi        110.2167       37.5000           90       161     2012      03        14        074              0.138667       6.410828       0.401418       0.234716       0.061000       0.032300   -9999.000000       0.171000
53754     53754     shaanxi        110.2167       37.5000           90       161     2012      03        15        075              0.137333       8.374146       0.561441       0.249103       0.077000       0.042800       0.064800       0.523000
53754     53754     shaanxi        110.2167       37.5000           90       161     2012      03        16        076              0.139542       4.759613       0.000000       0.252329       0.063000       0.105600   -9999.000000   -9999.000000
53754     53754     shaanxi        110.2167       37.5000           90       161     2012      03        17        077              0.140042       7.758514       0.489310       0.249066       0.057000       0.055900       0.039900       0.315000
53754     53754     shaanxi        110.2167       37.5000           90       161     2012      03        18        078              0.138000       9.995697       0.000000       0.246063       0.070000   -9999.000000       0.055600       0.255000
53754     53754     shaanxi        110.2167       37.5000           90       161     2012      03        19        079              0.135833       6.903320       0.255597       0.245088   -9999.000000   -9999.000000       0.044600       0.264000
53754     53754     shaanxi        110.2167       37.5000           90       161     2012      03        20        080              0.136542       5.754120       0.541148       0.246216       0.062500       0.100700       0.053100       0.099000
53754     53754     shaanxi        110.2167       37.5000           90       161     2012      03        21        081              0.137125       8.362305       0.130137       0.246333   -9999.000000   -9999.000000       0.063800   -9999.000000
53754     53754     shaanxi        110.2167       37.5000           90       161     2012      03        22        082              0.158333       4.079926       0.122271       0.247036       0.091000       0.204900       0.060300       0.811000
53754     53754     shaanxi        110.2167       37.5000           90       161     2012      03        23        083              0.149583       4.815918       0.000000       0.250142   -9999.000000   -9999.000000       0.037200       0.166000
53754     53754     shaanxi        110.2167       37.5000           90       161     2012      03        24        084              0.143708       5.937317       0.083802       0.232632   -9999.000000   -9999.000000   -9999.000000       0.128000
53754     53754     shaanxi        110.2167       37.5000           90       161     2012      03        25        085              0.000000       8.395538       0.000000       0.232860       0.058000       0.076200       0.042000       0.092000
53754     53754     shaanxi        110.2167       37.5000           90       161     2012      03        26        086              0.140792      10.081299       0.000000       0.230182       0.052000   -9999.000000       0.055000       0.149000
53754     53754     shaanxi        110.2167       37.5000           90       161     2012      03        27        087              0.138625      11.374786       0.000000       0.225526       0.055000   -9999.000000   -9999.000000       0.159000
53754     53754     shaanxi        110.2167       37.5000           90       161     2012      03        28        088              0.135958      12.185028       0.157443       0.219508       0.084000   -9999.000000       0.067400       0.185000
53754     53754     shaanxi        110.2167       37.5000           90       161     2012      03        29        089              0.136083      12.703217       0.000000       0.220095       0.062000   -9999.000000       0.045600       0.115000
53754     53754     shaanxi        110.2167       37.5000           90       161     2012      03        30        090              0.132167      13.305634       0.000000       0.217419       0.042000   -9999.000000       0.054200   -9999.000000
53754     53754     shaanxi        110.2167       37.5000           90       161     2012      03        31        091              0.132167       8.935791       0.057462       0.212800       0.055000   -9999.000000       0.044300       0.034000
53754     53754     shaanxi        110.2167       37.5000           90       161     2012      04        01        092              0.130417      13.177094       0.000000       0.208225       0.061000       0.172800       0.050100       0.125000
53754     53754     shaanxi        110.2167       37.5000           90       161     2012      04        02        093              0.125792      14.378906       0.000000       0.204554       0.059000       0.096400   -9999.000000       0.104000
53754     53754     shaanxi        110.2167       37.5000           90       161     2012      04        03        094              0.124708       9.399200       0.255897       0.204590   -9999.000000   -9999.000000       0.041500       0.035000
53754     53754     shaanxi        110.2167       37.5000           90       161     2012      04        04        095              0.122500      12.163513       0.144193       0.200764       0.053000       0.016600       0.053900   -9999.000000
53754     53754     shaanxi        110.2167       37.5000           90       161     2012      04        05        096              0.119042      14.299255       0.000000       0.196783       0.051000   -9999.000000       0.039400       0.045000
53754     53754     shaanxi        110.2167       37.5000           90       161     2012      04        06        097              0.115833      13.669067       0.236019       0.193574       0.057000   -9999.000000       0.047100       0.048000
53754     53754     shaanxi        110.2167       37.5000           90       161     2012      04        07        098              0.112375      14.550110       0.000000       0.189968       0.053000       0.096300       0.045100       0.071000
53754     53754     shaanxi        110.2167       37.5000           90       161     2012      04        08        099              0.108625      16.189301       0.000000       0.186089       0.054000   -9999.000000       0.055400       0.001000
53754     53754     shaanxi        110.2167       37.5000           90       161     2012      04        09        100              0.104583      18.048462       0.000000       0.182677       0.054000       0.144400       0.039300   -9999.000000
53754     53754     shaanxi        110.2167       37.5000           90       161     2012      04        10        101              0.101542      19.022888       1.318994       0.181648       0.061000   -9999.000000       0.061600       0.036000
53754     53754     shaanxi        110.2167       37.5000           90       161     2012      04        11        102              0.099292      17.313416       2.180372       0.199293       0.053000       0.250800       0.053900       0.682000
53754     53754     shaanxi        110.2167       37.5000           90       161     2012      04        12        103              0.100917      10.884521       0.402013       0.222417       0.056000       0.103000       0.050600       0.538000
53754     53754     shaanxi        110.2167       37.5000           90       161     2012      04        13        104              0.102458      12.464172       0.533975       0.222302       0.059000   -9999.000000   -9999.000000       0.004000
53754     53754     shaanxi        110.2167       37.5000           90       161     2012      04        14        105              0.099792      15.807953       0.000000       0.213839       0.055000   -9999.000000       0.044800   -9999.000000
53754     53754     shaanxi        110.2167       37.5000           90       161     2012      04        15        106              0.096875      16.827057       0.000000       0.202225       0.047000   -9999.000000       0.040700       0.011000
53754     53754     shaanxi        110.2167       37.5000           90       161     2012      04        16        107              0.093208      18.654816       1.054688       0.191409       0.045500   -9999.000000       0.053100       0.019000
53754     53754     shaanxi        110.2167       37.5000           90       161     2012      04        17        108              0.090333      18.602173       0.180471       0.183691       0.049000       0.056500       0.045200       0.022000
53754     53754     shaanxi        110.2167       37.5000           90       161     2012      04        18        109              0.089417      18.511536       8.377671       0.183929       0.064000   -9999.000000   -9999.000000       0.153000
53754     53754     shaanxi        110.2167       37.5000           90       161     2012      04        19        110              0.087792      18.791687       0.000000       0.249313       0.051000   -9999.000000   -9999.000000   -9999.000000
53754     53754     shaanxi        110.2167       37.5000           90       161     2012      04        20        111              0.088083      16.192291       0.000000       0.245283       0.047000       0.016900       0.040500       0.003000
53754     53754     shaanxi        110.2167       37.5000           90       161     2012      04        21        112              0.087125      18.841522       0.000000       0.226322       0.044000   -9999.000000       0.053700       0.015000
53754     53754     shaanxi        110.2167       37.5000           90       161     2012      04        22        113              0.085875      19.989532       0.714014       0.208956       0.044000   -9999.000000   -9999.000000       0.047000
53754     53754     shaanxi        110.2167       37.5000           90       161     2012      04        23        114              0.119792      22.690216      23.722801       0.204036       0.050000   -9999.000000       0.037400       0.948000
53754     53754     shaanxi        110.2167       37.5000           90       161     2012      04        24        115              0.171000      23.601593       0.152686       0.283691       0.071000       0.073100       0.062300       0.846000
53754     53754     shaanxi        110.2167       37.5000           90       161     2012      04        25        116              0.000000      15.833374       0.000000       0.296892       0.056500       0.107900       0.065000       0.041000
53754     53754     shaanxi        110.2167       37.5000           90       161     2012      04        26        117              0.134792      14.488251       0.000000       0.271742       0.049000       0.213200       0.045900       0.117000
53754     53754     shaanxi        110.2167       37.5000           90       161     2012      04        27        118              0.124917      18.592468       0.000000       0.255281       0.053000       0.108500       0.034700       0.064000
53754     53754     shaanxi        110.2167       37.5000           90       161     2012      04        28        119              0.115792      19.610260       1.219141       0.241680       0.049000   -9999.000000       0.046800   -9999.000000
53754     53754     shaanxi        110.2167       37.5000           90       161     2012      04        29        120              0.107375      21.526886       0.000000       0.230208       0.053000       0.046100       0.050300       0.041000
53754     53754     shaanxi        110.2167       37.5000           90       161     2012      04        30        121              0.100667      24.340607       1.533740       0.218110       0.061000       0.071500   -9999.000000       0.080000
53754     53754     shaanxi        110.2167       37.5000           90       161     2012      05        01        122              0.096875      23.363892       1.795714       0.214577       0.078000   -9999.000000       0.066900       0.223000
53754     53754     shaanxi        110.2167       37.5000           90       161     2012      05        02        123              0.095750      18.160492       0.000000       0.253375       0.062000       0.141800       0.062400       0.081000
53754     53754     shaanxi        110.2167       37.5000           90       161     2012      05        03        124              0.091917      22.232849       0.120705       0.232906       0.052000   -9999.000000       0.047800   -9999.000000
53754     53754     shaanxi        110.2167       37.5000           90       161     2012      05        04        125              0.089000      22.633392       0.000000       0.219964       0.048000   -9999.000000       0.048300       0.062000
53754     53754     shaanxi        110.2167       37.5000           90       161     2012      05        05        126              0.086417      24.409058       0.000000       0.204502       0.048000   -9999.000000       0.049600       0.043000
53754     53754     shaanxi        110.2167       37.5000           90       161     2012      05        06        127              0.084708      25.303009       0.520406       0.192263       0.050500   -9999.000000   -9999.000000       0.098000
53754     53754     shaanxi        110.2167       37.5000           90       161     2012      05        07        128              0.083208      26.760712       0.059333       0.187066   -9999.000000   -9999.000000       0.056300       0.041000
53754     53754     shaanxi        110.2167       37.5000           90       161     2012      05        08        129              0.083333      24.547424       0.000000       0.192480       0.048000   -9999.000000       0.064900   -9999.000000
53754     53754     shaanxi        110.2167       37.5000           90       161     2012      05        09        130              0.081833      27.999817       0.114015       0.184142   -9999.000000   -9999.000000       0.053500       0.081000
53754     53754     shaanxi        110.2167       37.5000           90       161     2012      05        10        131              0.081583      27.591248       6.189030       0.180203   -9999.000000       0.099600       0.058400       0.024000
53754     53754     shaanxi        110.2167       37.5000           90       161     2012      05        11        132              0.087583      27.649719       0.126662       0.207082       0.057500   -9999.000000   -9999.000000       0.656000
53754     53754     shaanxi        110.2167       37.5000           90       161     2012      05        12        133              0.088792      20.795166       0.000000       0.243088       0.049500       0.063500       0.061000       0.030000
53754     53754     shaanxi        110.2167       37.5000           90       161     2012      05        13        134              0.085375      19.511963       0.221366       0.215885       0.055000       0.087700       0.052500   -9999.000000
53754     53754     shaanxi        110.2167       37.5000           90       161     2012      05        14        135              0.084125      17.552155       0.000000       0.205966       0.047000       0.140500       0.068100       0.010000
53754     53754     shaanxi        110.2167       37.5000           90       161     2012      05        15        136              0.082667      19.797668       0.000000       0.193956       0.045000       0.026500       0.056300   -9999.000000
53754     53754     shaanxi        110.2167       37.5000           90       161     2012      05        16        137              0.081542      21.288849       0.000000       0.184530       0.047000   -9999.000000       0.060600       0.045000
53754     53754     shaanxi        110.2167       37.5000           90       161     2012      05        17        138              0.081125      21.640594       0.000000       0.179268       0.047500       0.243000   -9999.000000       0.039000
53754     53754     shaanxi        110.2167       37.5000           90       161     2012      05        18        139              0.080875      24.573181       2.026713       0.175773       0.056000       0.063200       0.082300   -9999.000000
53754     53754     shaanxi        110.2167       37.5000           90       161     2012      05        19        140              0.080125      26.950348       0.000000       0.187521       0.050000       0.390800       0.070500       0.056000
53754     53754     shaanxi        110.2167       37.5000           90       161     2012      05        20        141              0.078833      27.724213       4.433101       0.188611   -9999.000000   -9999.000000       0.057200       0.062000
53754     53754     shaanxi        110.2167       37.5000           90       161     2012      05        21        142              0.123500      27.645966       6.756230       0.189318       0.084000   -9999.000000       0.096900       0.782000
53754     53754     shaanxi        110.2167       37.5000           90       161     2012      05        22        143              0.142042      17.141571       0.000000       0.280889       0.060000       0.259700       0.067900       0.126000
53754     53754     shaanxi        110.2167       37.5000           90       161     2012      05        23        144              0.122875      20.298340       0.204241       0.248859   -9999.000000       0.101400   -9999.000000       0.089000
53754     53754     shaanxi        110.2167       37.5000           90       161     2012      05        24        145              0.110125      20.347809       0.000000       0.232253       0.053000   -9999.000000       0.059300       0.043000
53754     53754     shaanxi        110.2167       37.5000           90       161     2012      05        25        146              0.000000      22.336700       0.572081       0.215352       0.060000   -9999.000000       0.074300       0.110000
53754     53754     shaanxi        110.2167       37.5000           90       161     2012      05        26        147              0.094917      23.968201       0.000000       0.205404       0.052000   -9999.000000       0.057700       0.049000
53754     53754     shaanxi        110.2167       37.5000           90       161     2012      05        27        148              0.089667      25.426239       0.000000       0.195239       0.046000   -9999.000000       0.061600   -9999.000000
53754     53754     shaanxi        110.2167       37.5000           90       161     2012      05        28        149              0.087417      26.908264       9.668347       0.183324       0.043000       0.053200   -9999.000000       0.054000
53754     53754     shaanxi        110.2167       37.5000           90       161     2012      05        29        150              0.099708      25.345337       0.000000       0.225500       0.052000   -9999.000000       0.068400       0.093000
53754     53754     shaanxi        110.2167       37.5000           90       161     2012      05        30        151              0.093708      22.537842       0.000000       0.250161       0.050000       0.099500       0.059300   -9999.000000
53754     53754     shaanxi        110.2167       37.5000           90       161     2012      05        31        152              0.087167      23.830231       2.133321       0.220803       0.061000       0.185700       0.050600   -9999.000000
53754     53754     shaanxi        110.2167       37.5000           90       161     2012      06        01        153              0.085375      24.656891       0.711845       0.226384       0.061000       0.155200       0.062700   -9999.000000
53754     53754     shaanxi        110.2167       37.5000           90       161     2012      06        02        154              0.083708      25.341614       1.074041       0.221227       0.047000   -9999.000000       0.064300       0.105000
53754     53754     shaanxi        110.2167       37.5000           90       161     2012      06        03        155              0.083167      24.213867       1.578518       0.213457       0.062000   -9999.000000   -9999.000000       0.216000
53754     53754     shaanxi        110.2167       37.5000           90       161     2012      06        04        156              0.082958      25.454742       0.000000       0.218316       0.051000   -9999.000000       0.072600       0.236000
53754     53754     shaanxi        110.2167       37.5000           90       161     2012      06        05        157              0.081708      27.563080       0.564002       0.201255   -9999.000000       0.025300       0.089300       0.066000
53754     53754     shaanxi        110.2167       37.5000           90       161     2012      06        06        158              0.079250      27.151794       0.276482       0.189480       0.059000   -9999.000000       0.069100   -9999.000000
53754     53754     shaanxi        110.2167       37.5000           90       161     2012      06        07        159              0.080083      22.553192       7.555922       0.197752       0.062000       0.185600       0.087200       0.098000
53754     53754     shaanxi        110.2167       37.5000           90       161     2012      06        08        160              0.081958      22.660248       0.000000       0.254552       0.060000   -9999.000000       0.077100       0.198000
53754     53754     shaanxi        110.2167       37.5000           90       161     2012      06        09        161              0.083167      23.897125       0.000000       0.236248       0.047000       0.143000       0.077500       0.216000
53754     53754     shaanxi        110.2167       37.5000           90       161     2012      06        10        162              0.081708      27.321014       1.994597       0.208790       0.051000       0.108400       0.062700       0.031000
53754     53754     shaanxi        110.2167       37.5000           90       161     2012      06        11        163              0.000000      24.406555       0.000000       0.190914       0.049000   -9999.000000       0.087900   -9999.000000
53754     53754     shaanxi        110.2167       37.5000           90       161     2012      06        12        164              0.079708      25.799469       0.000000       0.181202       0.047500       0.119600       0.077800       0.075000
53754     53754     shaanxi        110.2167       37.5000           90       161     2012      06        13        165              0.078625      27.783478       0.163530       0.175339       0.048000   -9999.000000       0.080400       0.062000
53754     53754     shaanxi        110.2167       37.5000           90       161     2012      06        14        166              0.077792      28.403687       0.000000       0.172315       0.053000   -9999.000000   -9999.000000       0.066000
53754     53754     shaanxi        110.2167       37.5000           90       161     2012      06        15        167              0.076958      26.429749       0.000000       0.171598       0.049000       0.034100       0.081300       0.037000
53754     53754     shaanxi        110.2167       37.5000           90       161     2012      06        16        168              0.076250      26.842529       0.000000       0.170423       0.046000   -9999.000000       0.074800   -9999.000000
53754     53754     shaanxi        110.2167       37.5000           90       161     2012      06        17        169              0.075583      28.665741       0.000000       0.168619       0.047000       0.089300       0.087700       0.070000
53754     53754     shaanxi        110.2167       37.5000           90       161     2012      06        18        170              0.075042      30.328705       0.494502       0.167368       0.047000       0.028400       0.072100   -9999.000000
53754     53754     shaanxi        110.2167       37.5000           90       161     2012      06        19        171              0.073542      31.701599       0.622458       0.169086       0.050000   -9999.000000       0.069400       0.338000
53754     53754     shaanxi        110.2167       37.5000           90       161     2012      06        20        172              0.076083      28.475739       6.210057       0.175556       0.056000   -9999.000000   -9999.000000       0.054000
53754     53754     shaanxi        110.2167       37.5000           90       161     2012      06        21        173              0.084000      29.798615       0.669834       0.201746       0.062000   -9999.000000       0.082200       0.685000
53754     53754     shaanxi        110.2167       37.5000           90       161     2012      06        22        174              0.083958      27.161346       1.340637       0.227154   -9999.000000   -9999.000000       0.097400       0.097000
53754     53754     shaanxi        110.2167       37.5000           90       161     2012      06        23        175              0.122417      30.289093      14.268131       0.198299       0.049000       0.151900       0.071800       0.346000
53754     53754     shaanxi        110.2167       37.5000           90       161     2012      06        24        176              0.175417      29.158600       0.151542       0.254293       0.074000   -9999.000000       0.097300       0.325000
53754     53754     shaanxi        110.2167       37.5000           90       161     2012      06        25        177              0.146208      27.333069       0.000000       0.269876       0.066000   -9999.000000       0.079900   -9999.000000
53754     53754     shaanxi        110.2167       37.5000           90       161     2012      06        26        178              0.128042      27.608002       0.000000       0.240924       0.065000   -9999.000000       0.084800       0.214000
53754     53754     shaanxi        110.2167       37.5000           90       161     2012      06        27        179              0.114542      27.107239      14.948802       0.223973       0.094000   -9999.000000       0.105000       0.982000
53754     53754     shaanxi        110.2167       37.5000           90       161     2012      06        28        180              0.208250      24.531647      43.128056       0.277184   -9999.000000       0.166100       0.100300       0.903000
53754     53754     shaanxi        110.2167       37.5000           90       161     2012      06        29        181              0.233208      21.647308       1.674388       0.363327       0.099000       0.288800       0.108300   -9999.000000
53754     53754     shaanxi        110.2167       37.5000           90       161     2012      06        30        182              0.192667      24.830475       0.000000       0.343635       0.068000   -9999.000000       0.089000   -9999.000000
53754     53754     shaanxi        110.2167       37.5000           90       161     2012      07        01        183              0.175458      26.747833       0.000000       0.314533       0.075000   -9999.000000   -9999.000000       0.496000
53754     53754     shaanxi        110.2167       37.5000           90       161     2012      07        02        184              0.162458      27.739563       0.683050       0.297994       0.070000   -9999.000000       0.101800       0.273000
53754     53754     shaanxi        110.2167       37.5000           90       161     2012      07        03        185              0.151792      28.254364       3.852530       0.284244       0.064000       0.077000       0.116800       0.317000
53754     53754     shaanxi        110.2167       37.5000           90       161     2012      07        04        186              0.146542      27.187469       3.028666       0.287904       0.060000   -9999.000000       0.126000       0.364000
53754     53754     shaanxi        110.2167       37.5000           90       161     2012      07        05        187              0.140042      26.767792       0.000000       0.295148       0.056000       0.153600       0.096300   -9999.000000
53754     53754     shaanxi        110.2167       37.5000           90       161     2012      07        06        188              0.131250      28.350739       0.120570       0.278763   -9999.000000       0.123000       0.090600       0.269000
53754     53754     shaanxi        110.2167       37.5000           90       161     2012      07        07        189              0.125500      28.105438       0.859526       0.266900   -9999.000000       0.099800   -9999.000000       0.411000
53754     53754     shaanxi        110.2167       37.5000           90       161     2012      07        08        190              0.129958      27.177338       2.782224       0.270388       0.084000       0.035200       0.106800       0.360000
53754     53754     shaanxi        110.2167       37.5000           90       161     2012      07        09        191              0.137292      24.664429       0.085902       0.285392       0.062000   -9999.000000       0.125700       0.416000
53754     53754     shaanxi        110.2167       37.5000           90       161     2012      07        10        192              0.132875      27.323975       0.302931       0.271678       0.053000   -9999.000000       0.101200   -9999.000000
53754     53754     shaanxi        110.2167       37.5000           90       161     2012      07        11        193              0.124208      28.484222       0.000000       0.258024       0.064000       0.060800       0.107600       0.187000
53754     53754     shaanxi        110.2167       37.5000           90       161     2012      07        12        194              0.111875      29.380280       0.000000       0.239113       0.069000   -9999.000000       0.105200       0.208000
53754     53754     shaanxi        110.2167       37.5000           90       161     2012      07        13        195              0.101375      29.479736       4.471760       0.223507       0.089000   -9999.000000       0.128200       0.253000
53754     53754     shaanxi        110.2167       37.5000           90       161     2012      07        14        196              0.109458      28.902008      14.414650       0.238608       0.072000   -9999.000000       0.121400       0.453000
53754     53754     shaanxi        110.2167       37.5000           90       161     2012      07        15        197              0.149542      26.870300       0.488227       0.285016       0.068000   -9999.000000       0.124900   -9999.000000
53754     53754     shaanxi        110.2167       37.5000           90       161     2012      07        16        198              0.129042      27.170593       0.000000       0.293830       0.062000       0.136400       0.109000       0.398000
53754     53754     shaanxi        110.2167       37.5000           90       161     2012      07        17        199              0.113833      27.433899       0.000000       0.269099       0.076000       0.136400       0.110500   -9999.000000
53754     53754     shaanxi        110.2167       37.5000           90       161     2012      07        18        200              0.101667      26.649811       0.000000       0.255946       0.067000   -9999.000000   -9999.000000       0.213000
53754     53754     shaanxi        110.2167       37.5000           90       161     2012      07        19        201              0.092542      27.529144       0.000000       0.243770       0.058500   -9999.000000       0.107600       0.255000
53754     53754     shaanxi        110.2167       37.5000           90       161     2012      07        20        202              0.089739      28.617035       9.562503       0.232457       0.053000   -9999.000000       0.114500       0.221000
53754     53754     shaanxi        110.2167       37.5000           90       161     2012      07        21        203              0.207708      27.487579      28.802214       0.259347   -9999.000000       0.291600       0.144800       0.992000
53754     53754     shaanxi        110.2167       37.5000           90       161     2012      07        22        204              0.186042      23.310028       0.000000       0.356806       0.094000   -9999.000000       0.128100       0.886000
53754     53754     shaanxi        110.2167       37.5000           90       161     2012      07        23        205              0.165375      26.176849       0.000000       0.314176       0.097000       0.033200       0.124500       0.491000
53754     53754     shaanxi        110.2167       37.5000           90       161     2012      07        24        206              0.167500      26.066925       2.874281       0.300799       0.106000       0.172600   -9999.000000   -9999.000000
53754     53754     shaanxi        110.2167       37.5000           90       161     2012      07        25        207              0.162458      23.903748       0.391129       0.309395       0.090500       0.184300       0.120100       0.861000
53754     53754     shaanxi        110.2167       37.5000           90       161     2012      07        26        208              0.152125      27.116608       7.296839       0.298766       0.085000   -9999.000000       0.097900       0.611000
53754     53754     shaanxi        110.2167       37.5000           90       161     2012      07        27        209              0.160167      27.309937      36.710846       0.303989       0.101000   -9999.000000       0.129800       0.785000
53754     53754     shaanxi        110.2167       37.5000           90       161     2012      07        28        210              0.208167      27.239197       0.154397       0.351403       0.119000       0.281200       0.152300       0.886000
53754     53754     shaanxi        110.2167       37.5000           90       161     2012      07        29        211              0.179375      28.777283       0.300061       0.348270   -9999.000000       0.263100   -9999.000000   -9999.000000
53754     53754     shaanxi        110.2167       37.5000           90       161     2012      07        30        212              0.193083      29.055725      20.682621       0.326217       0.112500       0.235800       0.180000       0.977000
53754     53754     shaanxi        110.2167       37.5000           90       161     2012      07        31        213              0.187042      24.171509       5.968051       0.362593       0.097000   -9999.000000       0.150800       0.854000
53754     53754     shaanxi        110.2167       37.5000           90       161     2012      08        01        214              0.174500      25.291534       0.000000       0.342635       0.110000   -9999.000000       0.166900       0.893000
53754     53754     shaanxi        110.2167       37.5000           90       161     2012      08        02        215              0.160167      26.610382       0.307649       0.333823       0.119000       0.274400       0.135900       0.505000
53754     53754     shaanxi        110.2167       37.5000           90       161     2012      08        03        216              0.143958      28.047882       0.000000       0.319452       0.111000       0.211300       0.137500   -9999.000000
53754     53754     shaanxi        110.2167       37.5000           90       161     2012      08        04        217              0.127042      27.796844       0.000000       0.310289       0.089500   -9999.000000   -9999.000000       0.484000
53754     53754     shaanxi        110.2167       37.5000           90       161     2012      08        05        218              0.111458      28.321564       0.855959       0.300531       0.084500   -9999.000000       0.131600       0.397000
53754     53754     shaanxi        110.2167       37.5000           90       161     2012      08        06        219              0.100000      28.014221       0.000000       0.298502       0.091000   -9999.000000       0.150200       0.373000
53754     53754     shaanxi        110.2167       37.5000           90       161     2012      08        07        220              0.093375      28.074066       5.475642       0.289179       0.079000   -9999.000000       0.128300       0.281000
53754     53754     shaanxi        110.2167       37.5000           90       161     2012      08        08        221              0.093000      29.429382       2.534294       0.288805       0.101000       0.160900       0.136600   -9999.000000
53754     53754     shaanxi        110.2167       37.5000           90       161     2012      08        09        222              0.090208      27.537506       0.000000       0.309240       0.098000   -9999.000000       0.134700       0.315000
53754     53754     shaanxi        110.2167       37.5000           90       161     2012      08        10        223              0.087000      27.085175       0.000000       0.288113       0.079500       0.262300   -9999.000000       0.335000
53754     53754     shaanxi        110.2167       37.5000           90       161     2012      08        11        224              0.084167      27.106873       0.176675       0.275382       0.081000       0.135100       0.123100       0.310000
53754     53754     shaanxi        110.2167       37.5000           90       161     2012      08        12        225              0.082208      27.097992       0.393055       0.271628       0.086000       0.125800       0.142500       0.223000
53754     53754     shaanxi        110.2167       37.5000           90       161     2012      08        13        226              0.081542      25.531952       4.066194       0.272648       0.119000       0.038600       0.129600   -9999.000000
53754     53754     shaanxi        110.2167       37.5000           90       161     2012      08        14        227              0.091958      25.787201       1.930381       0.274409       0.120000   -9999.000000       0.159900       0.680000
53754     53754     shaanxi        110.2167       37.5000           90       161     2012      08        15        228              0.096958      24.926544       0.860400       0.295648       0.088500   -9999.000000   -9999.000000   -9999.000000
53754     53754     shaanxi        110.2167       37.5000           90       161     2012      08        16        229              0.090208      25.849304       3.026855       0.274583       0.085000       0.283600       0.167800       0.437000
53754     53754     shaanxi        110.2167       37.5000           90       161     2012      08        17        230              0.164000      27.264130      11.808848       0.274110   -9999.000000   -9999.000000       0.141600       0.866000
53754     53754     shaanxi        110.2167       37.5000           90       161     2012      08        18        231              0.196083      23.349518       6.854591       0.326237       0.135000       0.291100       0.176900       0.930000
53754     53754     shaanxi        110.2167       37.5000           90       161     2012      08        19        232              0.172000      23.701660       0.000000       0.328925       0.129000   -9999.000000       0.152400       0.626000
53754     53754     shaanxi        110.2167       37.5000           90       161     2012      08        20        233              0.153500      25.648682       0.246280       0.304128       0.121000   -9999.000000       0.164900       0.563000
53754     53754     shaanxi        110.2167       37.5000           90       161     2012      08        21        234              0.136208      24.306732       0.000000       0.292554       0.102500       0.171900   -9999.000000       0.531000
53754     53754     shaanxi        110.2167       37.5000           90       161     2012      08        22        235              0.121708      21.521820       0.000000       0.280580       0.097000   -9999.000000       0.148200   -9999.000000
53754     53754     shaanxi        110.2167       37.5000           90       161     2012      08        23        236              0.107833      22.466858       0.000000       0.273150       0.095000   -9999.000000       0.166800       0.300000
53754     53754     shaanxi        110.2167       37.5000           90       161     2012      08        24        237              0.096458      23.263367       0.000000       0.265831   -9999.000000   -9999.000000       0.142200   -9999.000000
53754     53754     shaanxi        110.2167       37.5000           90       161     2012      08        25        238              0.000000      24.518646      11.101091       0.258525   -9999.000000       0.211700       0.152400   -9999.000000
53754     53754     shaanxi        110.2167       37.5000           90       161     2012      08        26        239              0.086542      25.272980       0.000000       0.275704       0.104000   -9999.000000       0.160400       0.393000
53754     53754     shaanxi        110.2167       37.5000           90       161     2012      08        27        240              0.084167      24.307037       0.638725       0.294389       0.103500   -9999.000000       0.158100   -9999.000000
53754     53754     shaanxi        110.2167       37.5000           90       161     2012      08        28        241              0.082167      24.461365       0.000000       0.282121       0.109000       0.287400       0.126800       0.521000
53754     53754     shaanxi        110.2167       37.5000           90       161     2012      08        29        242              0.080125      25.431671       0.112101       0.269234       0.106000       0.173900       0.143200       0.343000
53754     53754     shaanxi        110.2167       37.5000           90       161     2012      08        30        243              0.078083      25.674347       0.504747       0.256692       0.100000       0.210400       0.123800       0.391000
53754     53754     shaanxi        110.2167       37.5000           90       161     2012      08        31        244              0.079208      25.306915      25.978594       0.248426       0.109000       0.220900       0.137900       0.364000
53754     53754     shaanxi        110.2167       37.5000           90       161     2012      09        01        245              0.238833      23.571381      40.253704       0.292256       0.150000   -9999.000000   -9999.000000   -9999.000000
53754     53754     shaanxi        110.2167       37.5000           90       161     2012      09        02        246              0.206250      18.280548       0.000000       0.381248       0.140000       0.100200       0.166800       0.937000
53754     53754     shaanxi        110.2167       37.5000           90       161     2012      09        03        247              0.186625      20.400330       0.000000       0.341213       0.116000       0.254400       0.131200       0.715000
53754     53754     shaanxi        110.2167       37.5000           90       161     2012      09        04        248              0.174250      20.007294       3.771322       0.327594       0.136000   -9999.000000       0.148800       0.771000
53754     53754     shaanxi        110.2167       37.5000           90       161     2012      09        05        249              0.187583      21.208374      21.568447       0.324849       0.125000       0.241000       0.139800       0.746000
53754     53754     shaanxi        110.2167       37.5000           90       161     2012      09        06        250              0.249167      21.222229       2.506766       0.342587       0.140500   -9999.000000       0.156800   -9999.000000
53754     53754     shaanxi        110.2167       37.5000           90       161     2012      09        07        251              0.219167      19.697174       0.000000       0.356805       0.116000   -9999.000000   -9999.000000       0.939000
53754     53754     shaanxi        110.2167       37.5000           90       161     2012      09        08        252              0.202042      21.193573       0.579164       0.336830       0.125000   -9999.000000       0.129200       0.798000
53754     53754     shaanxi        110.2167       37.5000           90       161     2012      09        09        253              0.189250      22.531097       2.192817       0.327884       0.129000       0.445600       0.146700       0.784000
53754     53754     shaanxi        110.2167       37.5000           90       161     2012      09        10        254              0.219083      22.006836      12.938822       0.320588       0.137000   -9999.000000       0.127500       0.932000
53754     53754     shaanxi        110.2167       37.5000           90       161     2012      09        11        255              0.212083      18.625183       1.629221       0.349547       0.120000   -9999.000000       0.139800   -9999.000000
53754     53754     shaanxi        110.2167       37.5000           90       161     2012      09        12        256              0.193292      18.934845       0.000000       0.336225       0.116500   -9999.000000       0.136700       0.818000
53754     53754     shaanxi        110.2167       37.5000           90       161     2012      09        13        257              0.181500      15.247864       0.338416       0.325481       0.098000       0.255600       0.134100       0.523000
53754     53754     shaanxi        110.2167       37.5000           90       161     2012      09        14        258              0.172333      16.493195       0.000000       0.318933       0.097000   -9999.000000       0.107100       0.433000
53754     53754     shaanxi        110.2167       37.5000           90       161     2012      09        15        259              0.163458      17.556244       0.347585       0.313119       0.113000   -9999.000000       0.130400       0.409000
53754     53754     shaanxi        110.2167       37.5000           90       161     2012      09        16        260              0.155000      18.851837       0.559437       0.308751       0.110000       0.106600       0.110900       0.451000
53754     53754     shaanxi        110.2167       37.5000           90       161     2012      09        17        261              0.150042      17.909454       6.148325       0.306785       0.096500   -9999.000000       0.103600       0.471000
53754     53754     shaanxi        110.2167       37.5000           90       161     2012      09        18        262              0.145500      18.425568       0.000000       0.304843       0.104000       0.131400   -9999.000000       0.514000
53754     53754     shaanxi        110.2167       37.5000           90       161     2012      09        19        263              0.140250      19.737457       0.337939       0.299933       0.092000   -9999.000000       0.101300       0.322000
53754     53754     shaanxi        110.2167       37.5000           90       161     2012      09        20        264              0.136667      20.393494       3.833798       0.295312       0.136000       0.138400       0.121400   -9999.000000
53754     53754     shaanxi        110.2167       37.5000           90       161     2012      09        21        265              0.149708      19.406036       0.194723       0.303235   -9999.000000       0.302800       0.107100       0.768000
53754     53754     shaanxi        110.2167       37.5000           90       161     2012      09        22        266              0.148542      18.434143       0.000000       0.308468       0.083000       0.160400       0.100800       0.520000
53754     53754     shaanxi        110.2167       37.5000           90       161     2012      09        23        267              0.144083      18.300964       0.000000       0.301408       0.084500       0.322900       0.104300       0.523000
53754     53754     shaanxi        110.2167       37.5000           90       161     2012      09        24        268              0.139042      19.824158      11.004439       0.295149       0.091000   -9999.000000   -9999.000000       0.515000
53754     53754     shaanxi        110.2167       37.5000           90       161     2012      09        25        269              0.225167      19.704834      19.642054       0.310201   -9999.000000       0.202000       0.119900   -9999.000000
53754     53754     shaanxi        110.2167       37.5000           90       161     2012      09        26        270              0.210542      14.666840       0.575667       0.361976       0.114000       0.243700       0.132000       0.881000
53754     53754     shaanxi        110.2167       37.5000           90       161     2012      09        27        271              0.197714      16.723907       0.000000       0.334608       0.106500   -9999.000000       0.114200       0.645000
53754     53754     shaanxi        110.2167       37.5000           90       161     2012      09        28        272              0.175600      14.843903       0.000000       0.322676       0.096500   -9999.000000       0.124900       0.653000
53754     53754     shaanxi        110.2167       37.5000           90       161     2012      09        29        273              0.170500      13.785400       0.000000       0.316745       0.090000   -9999.000000   -9999.000000       0.389000
53754     53754     shaanxi        110.2167       37.5000           90       161     2012      09        30        274              0.163500      14.136139       0.266445       0.312221       0.088000       0.160800       0.114400   -9999.000000
53754     53754     shaanxi        110.2167       37.5000           90       161     2012      10        01        275              0.157375      14.462433       0.000000       0.308235       0.088000       0.142100       0.081800       0.449000
53754     53754     shaanxi        110.2167       37.5000           90       161     2012      10        02        276              0.152333      16.165253       0.000000       0.304428       0.083000   -9999.000000       0.099400       0.400000
53754     53754     shaanxi        110.2167       37.5000           90       161     2012      10        03        277              0.147333      17.438812       0.000000       0.302252       0.075000   -9999.000000       0.082700       0.500000
53754     53754     shaanxi        110.2167       37.5000           90       161     2012      10        04        278              0.145292      16.775146       7.540395       0.297976       0.100500   -9999.000000       0.105800       0.395000
53754     53754     shaanxi        110.2167       37.5000           90       161     2012      10        05        279              0.164500      14.266205       0.000000       0.315582       0.089000       0.171000   -9999.000000   -9999.000000
53754     53754     shaanxi        110.2167       37.5000           90       161     2012      10        06        280              0.158083      14.269440       0.000000       0.317226       0.098000       0.181200       0.093600       0.604000
53754     53754     shaanxi        110.2167       37.5000           90       161     2012      10        07        281              0.154333      15.053680       0.000000       0.307707       0.101000   -9999.000000       0.116600       0.523000
53754     53754     shaanxi        110.2167       37.5000           90       161     2012      10        08        282              0.152208      14.223816       1.157971       0.306862       0.081500       0.236600       0.082100       0.615000
53754     53754     shaanxi        110.2167       37.5000           90       161     2012      10        09        283              0.148792      15.161530       0.000000       0.307298       0.082500       0.222000       0.083900       0.309000
53754     53754     shaanxi        110.2167       37.5000           90       161     2012      10        10        284              0.143417      12.950500       0.000000       0.301786       0.078000       0.222400       0.089700   -9999.000000
53754     53754     shaanxi        110.2167       37.5000           90       161     2012      10        11        285              0.139708      13.628265       0.000000       0.297780       0.068000   -9999.000000   -9999.000000       0.428000
53754     53754     shaanxi        110.2167       37.5000           90       161     2012      10        12        286              0.135125      15.303162       1.546596       0.294835       0.073000   -9999.000000       0.070800   -9999.000000
53754     53754     shaanxi        110.2167       37.5000           90       161     2012      10        13        287              0.131083      14.381378       0.000000       0.291617       0.071000       0.164900       0.093900       0.233000
53754     53754     shaanxi        110.2167       37.5000           90       161     2012      10        14        288              0.128000      13.624878       0.368321       0.288818       0.069000       0.306000       0.077300       0.453000
53754     53754     shaanxi        110.2167       37.5000           90       161     2012      10        15        289              0.128958      14.470551       5.928758       0.289529       0.083000   -9999.000000       0.090200       0.441000
53754     53754     shaanxi        110.2167       37.5000           90       161     2012      10        16        290              0.138458      13.263763       0.740248       0.306550       0.077000       0.215600   -9999.000000       0.564000
53754     53754     shaanxi        110.2167       37.5000           90       161     2012      10        17        291              0.134917       8.995331       0.095518       0.304001   -9999.000000   -9999.000000       0.085500       0.476000
53754     53754     shaanxi        110.2167       37.5000           90       161     2012      10        18        292              0.131542       9.068878       0.158240       0.297571   -9999.000000       0.176200       0.081600       0.250000
53754     53754     shaanxi        110.2167       37.5000           90       161     2012      10        19        293              0.130167       7.895233       0.065145       0.296700       0.072500       0.160100       0.092900   -9999.000000
53754     53754     shaanxi        110.2167       37.5000           90       161     2012      10        20        294              0.129250      11.068329       0.000000       0.294105       0.071000   -9999.000000       0.075700       0.341000
53754     53754     shaanxi        110.2167       37.5000           90       161     2012      10        21        295              0.125958      13.746216       1.818567       0.291919   -9999.000000   -9999.000000       0.098600       0.649000
53754     53754     shaanxi        110.2167       37.5000           90       161     2012      10        22        296              0.128042       7.288330       0.212162       0.301330   -9999.000000   -9999.000000   -9999.000000       0.631000
53754     53754     shaanxi        110.2167       37.5000           90       161     2012      10        23        297              0.126750       8.150787       0.000000       0.296221   -9999.000000   -9999.000000       0.074600       0.277000
53754     53754     shaanxi        110.2167       37.5000           90       161     2012      10        24        298              0.125958       8.494476       0.000000       0.293670   -9999.000000       0.112200       0.087600   -9999.000000
53754     53754     shaanxi        110.2167       37.5000           90       161     2012      10        25        299              0.000000       9.619507       0.000000       0.291000       0.068500   -9999.000000       0.070500       0.260000
53754     53754     shaanxi        110.2167       37.5000           90       161     2012      10        26        300              0.121833      10.277039       0.152412       0.289009       0.074000       0.167700       0.085800       0.334000
53754     53754     shaanxi        110.2167       37.5000           90       161     2012      10        27        301              0.121833       7.780518       0.000000       0.291548       0.067000       0.192100       0.083100       0.374000
53754     53754     shaanxi        110.2167       37.5000           90       161     2012      10        28        302              0.000000       9.298096       0.664616       0.289445       0.078000   -9999.000000       0.087900       0.199000
53754     53754     shaanxi        110.2167       37.5000           90       161     2012      10        29        303              0.119000      11.478882       0.000000       0.287600   -9999.000000   -9999.000000       0.057600   -9999.000000
53754     53754     shaanxi        110.2167       37.5000           90       161     2012      10        30        304              0.115583       8.602875       0.000000       0.282747       0.064000   -9999.000000       0.078700       0.166000
53754     53754     shaanxi        110.2167       37.5000           90       161     2012      10        31        305              0.114083       7.060394       0.000000       0.281171       0.060000   -9999.000000       0.065200       0.182000
53754     53754     shaanxi        110.2167       37.5000           90       161     2012      11        01        306              0.112500       7.064758       0.000000       0.278807       0.066000       0.207400       0.075400       0.214000
53754     53754     shaanxi        110.2167       37.5000           90       161     2012      11        02        307              0.112042       7.456177       1.666904       0.280553   -9999.000000   -9999.000000   -9999.000000       0.469000
53754     53754     shaanxi        110.2167       37.5000           90       161     2012      11        03        308              0.107750       9.455170       0.588458       0.284543   -9999.000000   -9999.000000       0.071700   -9999.000000
53754     53754     shaanxi        110.2167       37.5000           90       161     2012      11        04        309              0.103208       2.012878       0.260026       0.252048       0.077000   -9999.000000       0.070800       0.201000
53754     53754     shaanxi        110.2167       37.5000           90       161     2012      11        05        310              0.103125       0.868896       0.110565       0.229548       0.072000   -9999.000000       0.071200       0.107000
53754     53754     shaanxi        110.2167       37.5000           90       161     2012      11        06        311              0.105792       1.510437       0.000000       0.234607       0.078000       0.011700       0.065500       0.210000
53754     53754     shaanxi        110.2167       37.5000           90       161     2012      11        07        312              0.107292       3.452057       0.020952       0.263459       0.077000       0.120100       0.074800       0.085000
53754     53754     shaanxi        110.2167       37.5000           90       161     2012      11        08        313              0.107333       2.940613       0.000000       0.259814   -9999.000000   -9999.000000   -9999.000000   -9999.000000
53754     53754     shaanxi        110.2167       37.5000           90       161     2012      11        09        314              0.110167       4.728455       1.848532       0.275927   -9999.000000   -9999.000000       0.071200       0.861000
53754     53754     shaanxi        110.2167       37.5000           90       161     2012      11        10        315              0.122250       3.813873       0.076793       0.291895       0.099000   -9999.000000       0.073400   -9999.000000
53754     53754     shaanxi        110.2167       37.5000           90       161     2012      11        11        316              0.117333       2.161560       0.191143       0.257326       0.091000       0.101100       0.069400       0.169000
53754     53754     shaanxi        110.2167       37.5000           90       161     2012      11        12        317              0.117667       1.688080       0.000000       0.237883       0.085000   -9999.000000       0.080900       0.297000
53754     53754     shaanxi        110.2167       37.5000           90       161     2012      11        13        318              0.000000       2.742188       0.000000       0.253129   -9999.000000       0.064500   -9999.000000       0.449000
53754     53754     shaanxi        110.2167       37.5000           90       161     2012      11        14        319              0.116500       2.305328       0.000000       0.244050   -9999.000000       0.091800       0.074100       0.187000
53754     53754     shaanxi        110.2167       37.5000           90       161     2012      11        15        320              0.117708       3.128937       0.188419       0.255770   -9999.000000   -9999.000000       0.046600       0.276000
53754     53754     shaanxi        110.2167       37.5000           90       161     2012      11        16        321              0.119542       0.761719       0.716200       0.240477       0.081000       0.018600       0.062200       0.270000
53754     53754     shaanxi        110.2167       37.5000           90       161     2012      11        17        322              0.000000       0.041138       0.000000       0.220857       0.090000   -9999.000000       0.071900   -9999.000000
53754     53754     shaanxi        110.2167       37.5000           90       161     2012      11        18        323              0.135792       1.904175       0.000000       0.246143       0.087000   -9999.000000       0.078000       0.527000
53754     53754     shaanxi        110.2167       37.5000           90       161     2012      11        19        324              0.134500       2.394684       0.000000       0.250088   -9999.000000       0.041700   -9999.000000       0.381000
53754     53754     shaanxi        110.2167       37.5000           90       161     2012      11        20        325              0.137292       2.832642       0.000000       0.262657       0.091000   -9999.000000       0.070700       0.466000
53754     53754     shaanxi        110.2167       37.5000           90       161     2012      11        21        326              0.138417       2.848663       0.000000       0.280781       0.079000       0.239000       0.075200       0.326000
53754     53754     shaanxi        110.2167       37.5000           90       161     2012      11        22        327              0.133250       5.214783       0.000000       0.286864       0.087000   -9999.000000       0.056700   -9999.000000
53754     53754     shaanxi        110.2167       37.5000           90       161     2012      11        23        328              0.124542       2.201385       0.000000       0.260175       0.074000   -9999.000000       0.056200       0.311000
53754     53754     shaanxi        110.2167       37.5000           90       161     2012      11        24        329              0.120000       1.010742       0.000000       0.228375   -9999.000000       0.014800       0.064900       0.178000
53754     53754     shaanxi        110.2167       37.5000           90       161     2012      11        25        330              0.120708       1.750122       0.000000       0.247353   -9999.000000   -9999.000000   -9999.000000       0.164000
53754     53754     shaanxi        110.2167       37.5000           90       161     2012      11        26        331              0.106750       0.833771       0.000000       0.231192       0.069000       0.002900   -9999.000000       0.040000
53754     53754     shaanxi        110.2167       37.5000           90       161     2012      11        27        332              0.107833       0.496552       0.000000       0.219788       0.062000   -9999.000000       0.058500   -9999.000000
53754     53754     shaanxi        110.2167       37.5000           90       161     2012      11        28        333              0.089083       0.882233       0.000000       0.226912       0.064000       0.130200       0.047200   -9999.000000
53754     53754     shaanxi        110.2167       37.5000           90       161     2012      11        29        334              0.079583      -1.592957       0.000000       0.191729   -9999.000000       0.064900       0.054600   -9999.000000
53754     53754     shaanxi        110.2167       37.5000           90       161     2012      11        30        335              0.079500      -1.261566       0.000000       0.194991   -9999.000000   -9999.000000   -9999.000000       0.027000
53754     53754     shaanxi        110.2167       37.5000           90       161     2012      12        01        336              0.082625      -0.014709       0.000000       0.205208       0.066000       0.017100       0.056100       0.007000
53754     53754     shaanxi        110.2167       37.5000           90       161     2012      12        02        337              0.084250       0.096619       0.000000       0.211219       0.067000       0.092200       0.045000   -9999.000000
53754     53754     shaanxi        110.2167       37.5000           90       161     2012      12        03        338              0.078167      -0.255737       0.000000       0.208290       0.067000       0.069700       0.059300       0.003000
53754     53754     shaanxi        110.2167       37.5000           90       161     2012      12        04        339              0.079833      -1.576355       0.000000       0.190805       0.066000       0.203900       0.049500   -9999.000000
53754     53754     shaanxi        110.2167       37.5000           90       161     2012      12        05        340              0.073708      -0.207642       0.051345       0.207629   -9999.000000   -9999.000000       0.052200   -9999.000000
53754     53754     shaanxi        110.2167       37.5000           90       161     2012      12        06        341              0.073583      -2.493774       0.193898       0.183771   -9999.000000   -9999.000000   -9999.000000   -9999.000000
53754     53754     shaanxi        110.2167       37.5000           90       161     2012      12        07        342              0.072750      -1.249664       0.000000       0.195913       0.068000       0.028700       0.046200   -9999.000000
53754     53754     shaanxi        110.2167       37.5000           90       161     2012      12        08        343              0.068292      -2.324249       0.000000       0.186020       0.071000       0.039700       0.058600   -9999.000000
53754     53754     shaanxi        110.2167       37.5000           90       161     2012      12        09        344              0.067750      -4.850861       0.000000       0.158313       0.066000       0.052100       0.044700   -9999.000000
53754     53754     shaanxi        110.2167       37.5000           90       161     2012      12        10        345              0.067917      -3.595551       0.000000       0.167568   -9999.000000   -9999.000000       0.053100   -9999.000000
53754     53754     shaanxi        110.2167       37.5000           90       161     2012      12        11        346              0.068417      -2.823547       0.000000       0.181376   -9999.000000   -9999.000000       0.052300   -9999.000000
53754     53754     shaanxi        110.2167       37.5000           90       161     2012      12        12        347              0.069958      -1.762421       0.000000       0.185173       0.055000   -9999.000000       0.062500   -9999.000000
53754     53754     shaanxi        110.2167       37.5000           90       161     2012      12        13        348              0.071417      -1.081268       0.000000       0.192623   -9999.000000   -9999.000000       0.041500       0.073000
53754     53754     shaanxi        110.2167       37.5000           90       161     2012      12        14        349              0.075375      -0.843475       0.000000       0.188182       0.065000   -9999.000000       0.062500       0.061000
53754     53754     shaanxi        110.2167       37.5000           90       161     2012      12        15        350              0.000000       0.233154       0.000000       0.208999   -9999.000000   -9999.000000       0.052300       0.012000
53754     53754     shaanxi        110.2167       37.5000           90       161     2012      12        16        351              0.083250       0.023895       0.000000       0.207431   -9999.000000   -9999.000000       0.057600   -9999.000000
53754     53754     shaanxi        110.2167       37.5000           90       161     2012      12        17        352              0.074125      -0.125824       0.000000       0.209607       0.065000       0.040500   -9999.000000   -9999.000000
53754     53754     shaanxi        110.2167       37.5000           90       161     2012      12        18        353              0.070042      -2.602722       0.000000       0.179018       0.060000   -9999.000000       0.050900   -9999.000000
53754     53754     shaanxi        110.2167       37.5000           90       161     2012      12        19        354              0.069833      -2.938019       0.000000       0.171772   -9999.000000   -9999.000000       0.047100       0.002000
53754     53754     shaanxi        110.2167       37.5000           90       161     2012      12        20        355              0.000000      -2.230408       0.276312       0.171106   -9999.000000       0.106600       0.054500       0.040000
53754     53754     shaanxi        110.2167       37.5000           90       161     2012      12        21        356              0.068167      -2.974823       0.000000       0.166755   -9999.000000       0.047200       0.045100   -9999.000000
53754     53754     shaanxi        110.2167       37.5000           90       161     2012      12        22        357              0.065500      -6.215668       0.000000       0.143165   -9999.000000   -9999.000000       0.047600   -9999.000000
53754     53754     shaanxi        110.2167       37.5000           90       161     2012      12        23        358              0.063750      -8.996674       0.000000       0.137485   -9999.000000   -9999.000000   -9999.000000   -9999.000000
53754     53754     shaanxi        110.2167       37.5000           90       161     2012      12        24        359              0.063778     -10.074005       0.526166       0.134481   -9999.000000   -9999.000000       0.040700   -9999.000000
53754     53754     shaanxi        110.2167       37.5000           90       161     2012      12        25        360              0.064292      -7.575348       0.000000       0.135702   -9999.000000       0.030500       0.054400   -9999.000000
53754     53754     shaanxi        110.2167       37.5000           90       161     2012      12        26        361              0.000000      -7.422455       0.000000       0.135775   -9999.000000       0.088900       0.045100   -9999.000000
53754     53754     shaanxi        110.2167       37.5000           90       161     2012      12        27        362              0.064750      -6.213318       0.000000       0.141996   -9999.000000       0.008900       0.052500   -9999.000000
53754     53754     shaanxi        110.2167       37.5000           90       161     2012      12        28        363              0.000000      -4.596100       0.000000       0.156095   -9999.000000   -9999.000000       0.051600   -9999.000000
53754     53754     shaanxi        110.2167       37.5000           90       161     2012      12        29        364              0.000000      -6.137115       0.000000       0.143262   -9999.000000   -9999.000000       0.055500   -9999.000000
53754     53754     shaanxi        110.2167       37.5000           90       161     2012      12        30        365              0.000000      -8.822906       0.000000       0.136747       0.067000   -9999.000000       0.039300   -9999.000000
53754     53754     shaanxi        110.2167       37.5000           90       161     2012      12        31        366              0.064200      -7.584320       0.000000       0.137335   -9999.000000       0.070200       0.054600   -9999.000000
