# Supplementary material for: Research on Fusing Multisatellite Soil Moisture Data Based on Bayesian Model Averaging
Source: Hindawi journal article supplement (doi:10.1155/2018/9310838), 2018-06-25
Supplement: f1 [file 9310838.f1.zip › 2012_sm00-10cm_daily_ZDB_ZHY_53759_366days_allin.txt]

53759     53759     shanxi         110.8333       36.9833           92       163     2012      01        01        001              0.000000   -9999.000000       0.000000   -9999.000000       0.060000   -9999.000000       0.038100   -9999.000000
53759     53759     shanxi         110.8333       36.9833           92       163     2012      01        02        002              0.066292      -2.970886       0.000000       0.171594   -9999.000000   -9999.000000       0.040100   -9999.000000
53759     53759     shanxi         110.8333       36.9833           92       163     2012      01        03        003              0.000000      -4.571686       0.000000       0.158170   -9999.000000       0.035000       0.040700   -9999.000000
53759     53759     shanxi         110.8333       36.9833           92       163     2012      01        04        004              0.062458      -6.753113       0.000000       0.143060   -9999.000000   -9999.000000       0.036900   -9999.000000
53759     53759     shanxi         110.8333       36.9833           92       163     2012      01        05        005              0.063583      -6.406158       0.000000       0.147932   -9999.000000   -9999.000000       0.039600   -9999.000000
53759     53759     shanxi         110.8333       36.9833           92       163     2012      01        06        006              0.065583      -5.031555       0.000000       0.155419       0.059000   -9999.000000       0.037600   -9999.000000
53759     53759     shanxi         110.8333       36.9833           92       163     2012      01        07        007              0.068417      -2.995605       0.000000       0.171396   -9999.000000       0.067200       0.041100   -9999.000000
53759     53759     shanxi         110.8333       36.9833           92       163     2012      01        08        008              0.000000      -2.491089       0.000000       0.173084       0.068000       0.035500   -9999.000000   -9999.000000
53759     53759     shanxi         110.8333       36.9833           92       163     2012      01        09        009              0.065750      -2.879608       0.000000       0.175061   -9999.000000       0.178500   -9999.000000       0.010000
53759     53759     shanxi         110.8333       36.9833           92       163     2012      01        10        010              0.064417      -2.831604       0.000000       0.178504   -9999.000000   -9999.000000       0.037000   -9999.000000
53759     53759     shanxi         110.8333       36.9833           92       163     2012      01        11        011              0.064083      -3.522003       0.000000       0.171811       0.058000   -9999.000000       0.040300       0.012000
53759     53759     shanxi         110.8333       36.9833           92       163     2012      01        12        012              0.064625      -3.770538       0.000000       0.169004       0.058000       0.055300       0.037000   -9999.000000
53759     53759     shanxi         110.8333       36.9833           92       163     2012      01        13        013              0.064875      -3.310303       0.000000       0.174347       0.063000   -9999.000000       0.038300   -9999.000000
53759     53759     shanxi         110.8333       36.9833           92       163     2012      01        14        014              0.064958      -3.001404       0.000000       0.172434   -9999.000000   -9999.000000   -9999.000000   -9999.000000
53759     53759     shanxi         110.8333       36.9833           92       163     2012      01        15        015              0.066458      -2.925507       0.000000       0.175356   -9999.000000   -9999.000000       0.038200   -9999.000000
53759     53759     shanxi         110.8333       36.9833           92       163     2012      01        16        016              0.066792      -1.734741       0.000000       0.187671       0.063000   -9999.000000       0.036000       0.019000
53759     53759     shanxi         110.8333       36.9833           92       163     2012      01        17        017              0.000000      -1.765625       0.000000       0.186127       0.060000       0.015000       0.032300   -9999.000000
53759     53759     shanxi         110.8333       36.9833           92       163     2012      01        18        018              0.068125      -1.217346       0.000000       0.193333       0.063000   -9999.000000       0.034800   -9999.000000
53759     53759     shanxi         110.8333       36.9833           92       163     2012      01        19        019              0.070375      -0.673950       0.000000       0.199042       0.066000   -9999.000000       0.036100   -9999.000000
53759     53759     shanxi         110.8333       36.9833           92       163     2012      01        20        020              0.071304       0.156189       0.000000       0.208072   -9999.000000       0.020400       0.035000   -9999.000000
53759     53759     shanxi         110.8333       36.9833           92       163     2012      01        21        021              0.068333      -2.287109       0.000000       0.178662   -9999.000000   -9999.000000       0.029700       0.003000
53759     53759     shanxi         110.8333       36.9833           92       163     2012      01        22        022              0.065000      -6.423279       0.000000       0.147829   -9999.000000   -9999.000000       0.032200   -9999.000000
53759     53759     shanxi         110.8333       36.9833           92       163     2012      01        23        023              0.064083      -8.112823       0.000000       0.139626   -9999.000000   -9999.000000       0.032800   -9999.000000
53759     53759     shanxi         110.8333       36.9833           92       163     2012      01        24        024              0.063500      -8.169098       0.000000       0.137169   -9999.000000   -9999.000000   -9999.000000   -9999.000000
53759     53759     shanxi         110.8333       36.9833           92       163     2012      01        25        025              0.063167      -8.092072       0.000000       0.138171   -9999.000000   -9999.000000   -9999.000000   -9999.000000
53759     53759     shanxi         110.8333       36.9833           92       163     2012      01        26        026              0.063750      -5.981842       0.000000       0.151263   -9999.000000   -9999.000000       0.034200       0.014000
53759     53759     shanxi         110.8333       36.9833           92       163     2012      01        27        027              0.064083      -3.965515       0.000000       0.167845       0.063000       0.123200       0.035400   -9999.000000
53759     53759     shanxi         110.8333       36.9833           92       163     2012      01        28        028              0.064375      -2.460510       0.000000       0.181081       0.072000   -9999.000000       0.037400   -9999.000000
53759     53759     shanxi         110.8333       36.9833           92       163     2012      01        29        029              0.064792      -1.883698       0.000000       0.186655       0.067000   -9999.000000       0.035300   -9999.000000
53759     53759     shanxi         110.8333       36.9833           92       163     2012      01        30        030              0.065667      -1.536530       0.000000       0.192175   -9999.000000       0.097800       0.038600   -9999.000000
53759     53759     shanxi         110.8333       36.9833           92       163     2012      01        31        031              0.069667      -0.670502       0.000000       0.197538   -9999.000000       0.012700   -9999.000000       0.057000
53759     53759     shanxi         110.8333       36.9833           92       163     2012      02        01        032              0.064750       0.657776       0.000000       0.214423   -9999.000000       0.150100       0.034200   -9999.000000
53759     53759     shanxi         110.8333       36.9833           92       163     2012      02        02        033              0.063042      -3.875671       0.000000       0.172408       0.059000       0.059200       0.037000   -9999.000000
53759     53759     shanxi         110.8333       36.9833           92       163     2012      02        03        034              0.065250      -4.307922       0.079673       0.164824       0.064000   -9999.000000       0.036300   -9999.000000
53759     53759     shanxi         110.8333       36.9833           92       163     2012      02        04        035              0.067583      -1.817200       0.000000       0.185291       0.064000       0.034600       0.039100       0.008000
53759     53759     shanxi         110.8333       36.9833           92       163     2012      02        05        036              0.069083      -0.088531       0.000000       0.203054   -9999.000000       0.013200       0.037000       0.016000
53759     53759     shanxi         110.8333       36.9833           92       163     2012      02        06        037              0.065083       0.330017       0.000000       0.210264   -9999.000000   -9999.000000       0.036800   -9999.000000
53759     53759     shanxi         110.8333       36.9833           92       163     2012      02        07        038              0.062875      -4.190735       0.000000       0.170180       0.058000   -9999.000000       0.033400   -9999.000000
53759     53759     shanxi         110.8333       36.9833           92       163     2012      02        08        039              0.061917      -5.675507       0.254164       0.153302   -9999.000000   -9999.000000       0.039300   -9999.000000
53759     53759     shanxi         110.8333       36.9833           92       163     2012      02        09        040              0.063042      -6.872009       0.000000       0.140908   -9999.000000       0.088500       0.034000   -9999.000000
53759     53759     shanxi         110.8333       36.9833           92       163     2012      02        10        041              0.064417      -5.220825       0.000000       0.154271   -9999.000000   -9999.000000       0.035400   -9999.000000
53759     53759     shanxi         110.8333       36.9833           92       163     2012      02        11        042              0.067958      -3.058472       0.135049       0.178330   -9999.000000   -9999.000000   -9999.000000   -9999.000000
53759     53759     shanxi         110.8333       36.9833           92       163     2012      02        12        043              0.070208      -0.102142       0.000000       0.199361   -9999.000000   -9999.000000   -9999.000000   -9999.000000
53759     53759     shanxi         110.8333       36.9833           92       163     2012      02        13        044              0.070125       0.492493       0.463052       0.211691       0.063000       0.008300   -9999.000000       0.001000
53759     53759     shanxi         110.8333       36.9833           92       163     2012      02        14        045              0.070875       0.596222       0.031731       0.215755       0.061000   -9999.000000       0.040800       0.090000
53759     53759     shanxi         110.8333       36.9833           92       163     2012      02        15        046              0.070875       0.712555       0.030008       0.215754   -9999.000000   -9999.000000       0.040200   -9999.000000
53759     53759     shanxi         110.8333       36.9833           92       163     2012      02        16        047              0.068417       0.387756       0.000000       0.211584   -9999.000000   -9999.000000       0.039700   -9999.000000
53759     53759     shanxi         110.8333       36.9833           92       163     2012      02        17        048              0.066583      -1.563843       0.000000       0.193297       0.055000       0.170600   -9999.000000   -9999.000000
53759     53759     shanxi         110.8333       36.9833           92       163     2012      02        18        049              0.066500      -2.484375       0.000000       0.184024       0.054000       0.040300       0.037800       0.015000
53759     53759     shanxi         110.8333       36.9833           92       163     2012      02        19        050              0.069708      -2.441528       0.057339       0.184197       0.058000   -9999.000000       0.044700       0.040000
53759     53759     shanxi         110.8333       36.9833           92       163     2012      02        20        051              0.074208       0.458221       0.000000       0.204759   -9999.000000       0.067200       0.038700       0.018000
53759     53759     shanxi         110.8333       36.9833           92       163     2012      02        21        052              0.081417       2.589355       0.000000       0.225170   -9999.000000   -9999.000000   -9999.000000   -9999.000000
53759     53759     shanxi         110.8333       36.9833           92       163     2012      02        22        053              0.095333       4.495453       0.000000       0.243413       0.060000   -9999.000000   -9999.000000       0.068000
53759     53759     shanxi         110.8333       36.9833           92       163     2012      02        23        054              0.101125       4.312805       0.032712       0.243779       0.052000       0.005000       0.041900       0.135000
53759     53759     shanxi         110.8333       36.9833           92       163     2012      02        24        055              0.099250       3.438049       0.000000       0.242951       0.076000   -9999.000000       0.041000       0.154000
53759     53759     shanxi         110.8333       36.9833           92       163     2012      02        25        056              0.084042       2.702362       0.000000       0.235836   -9999.000000       0.063900       0.042800       0.046000
53759     53759     shanxi         110.8333       36.9833           92       163     2012      02        26        057              0.085125       0.202667       0.000000       0.212342   -9999.000000   -9999.000000       0.039600   -9999.000000
53759     53759     shanxi         110.8333       36.9833           92       163     2012      02        27        058              0.090167       2.128510       0.000000       0.222243   -9999.000000   -9999.000000   -9999.000000       0.051000
53759     53759     shanxi         110.8333       36.9833           92       163     2012      02        28        059              0.097958       3.656403       0.000000       0.236324       0.060000       0.142500   -9999.000000   -9999.000000
53759     53759     shanxi         110.8333       36.9833           92       163     2012      02        29        060              0.000000   -9999.000000       0.027976   -9999.000000       0.063000   -9999.000000   -9999.000000   -9999.000000
53759     53759     shanxi         110.8333       36.9833           92       163     2012      03        01        061              0.135958       3.980347       0.000000       0.241966       0.070000   -9999.000000       0.044300   -9999.000000
53759     53759     shanxi         110.8333       36.9833           92       163     2012      03        02        062              0.141083       3.200592       0.000000       0.248105   -9999.000000       0.013100       0.043400       0.183000
53759     53759     shanxi         110.8333       36.9833           92       163     2012      03        03        063              0.146625       2.735596       0.000000       0.250249   -9999.000000   -9999.000000       0.042600       0.215000
53759     53759     shanxi         110.8333       36.9833           92       163     2012      03        04        064              0.162208       3.497162       0.000000       0.248997       0.072000       0.076900       0.046900       0.349000
53759     53759     shanxi         110.8333       36.9833           92       163     2012      03        05        065              0.163000       4.672180       0.073788       0.253568       0.073000   -9999.000000   -9999.000000       0.149000
53759     53759     shanxi         110.8333       36.9833           92       163     2012      03        06        066              0.124375       3.296722       0.044603       0.232664       0.070000   -9999.000000       0.039700   -9999.000000
53759     53759     shanxi         110.8333       36.9833           92       163     2012      03        07        067              0.000000       1.767395       0.000000       0.218257   -9999.000000       0.015900       0.045400       0.136000
53759     53759     shanxi         110.8333       36.9833           92       163     2012      03        08        068              0.145083       4.318787       0.000000       0.239053   -9999.000000   -9999.000000       0.044100       0.236000
53759     53759     shanxi         110.8333       36.9833           92       163     2012      03        09        069              0.162000       4.595825       0.000000       0.250094       0.065000       0.059200       0.050800       0.373000
53759     53759     shanxi         110.8333       36.9833           92       163     2012      03        10        070              0.165261       5.208557       0.000000       0.249197       0.059000   -9999.000000   -9999.000000       0.102000
53759     53759     shanxi         110.8333       36.9833           92       163     2012      03        11        071              0.161833       5.405609       0.000000       0.237953       0.059000       0.114500       0.046700   -9999.000000
53759     53759     shanxi         110.8333       36.9833           92       163     2012      03        12        072              0.167542       5.229218       0.000000       0.240996       0.063000       0.114200       0.040200       0.188000
53759     53759     shanxi         110.8333       36.9833           92       163     2012      03        13        073              0.171708       6.636414       0.000000       0.242806   -9999.000000   -9999.000000       0.046400       0.240000
53759     53759     shanxi         110.8333       36.9833           92       163     2012      03        14        074              0.176261       8.292542       0.000000       0.244967       0.061000       0.176400   -9999.000000       0.251000
53759     53759     shanxi         110.8333       36.9833           92       163     2012      03        15        075              0.175833      10.039551       0.000000       0.244577       0.081000       0.092700       0.057800       0.418000
53759     53759     shanxi         110.8333       36.9833           92       163     2012      03        16        076              0.174667       5.889923       0.000000       0.248824       0.062000   -9999.000000   -9999.000000   -9999.000000
53759     53759     shanxi         110.8333       36.9833           92       163     2012      03        17        077              0.175542       9.503021       0.000000       0.245864       0.059000       0.143600       0.042700       0.215000
53759     53759     shanxi         110.8333       36.9833           92       163     2012      03        18        078              0.174667      11.648590       0.020680       0.240660       0.075000   -9999.000000       0.052500       0.293000
53759     53759     shanxi         110.8333       36.9833           92       163     2012      03        19        079              0.172750       9.536316       0.000000       0.239083       0.075000   -9999.000000       0.047600       0.277000
53759     53759     shanxi         110.8333       36.9833           92       163     2012      03        20        080              0.172435       8.381439       0.075563       0.242139       0.063000       0.131500       0.046100       0.148000
53759     53759     shanxi         110.8333       36.9833           92       163     2012      03        21        081              0.172000       9.986206       0.053574       0.240249   -9999.000000   -9999.000000       0.064700   -9999.000000
53759     53759     shanxi         110.8333       36.9833           92       163     2012      03        22        082              0.184824       5.422333       0.000000       0.244705       0.096000       0.128400   -9999.000000       0.668000
53759     53759     shanxi         110.8333       36.9833           92       163     2012      03        23        083              0.182045       5.494995       0.117269       0.247613   -9999.000000   -9999.000000       0.046100       0.240000
53759     53759     shanxi         110.8333       36.9833           92       163     2012      03        24        084              0.175435       6.654480       0.000000       0.236276   -9999.000000   -9999.000000   -9999.000000       0.218000
53759     53759     shanxi         110.8333       36.9833           92       163     2012      03        25        085              0.000000       9.784943       0.820083       0.234243       0.056000       0.106400       0.045700       0.169000
53759     53759     shanxi         110.8333       36.9833           92       163     2012      03        26        086              0.171435      11.871063       0.000000       0.228466       0.057000   -9999.000000       0.055700   -9999.000000
53759     53759     shanxi         110.8333       36.9833           92       163     2012      03        27        087              0.169250      13.028931       0.000000       0.221490       0.055000   -9999.000000   -9999.000000       0.176000
53759     53759     shanxi         110.8333       36.9833           92       163     2012      03        28        088              0.167292      13.987366       0.065408       0.215006       0.086000   -9999.000000       0.061400   -9999.000000
53759     53759     shanxi         110.8333       36.9833           92       163     2012      03        29        089              0.168455      13.686249       0.000000       0.215349       0.069000   -9999.000000       0.048600       0.132000
53759     53759     shanxi         110.8333       36.9833           92       163     2012      03        30        090              0.164958      14.279633       0.000000       0.212994       0.047000       0.154500       0.051900   -9999.000000
53759     53759     shanxi         110.8333       36.9833           92       163     2012      03        31        091              0.164042       9.377289       0.000000       0.210339       0.055500   -9999.000000       0.045400       0.059000
53759     53759     shanxi         110.8333       36.9833           92       163     2012      04        01        092              0.162958      14.255493       0.000000       0.205091       0.058000       0.196500       0.051400       0.157000
53759     53759     shanxi         110.8333       36.9833           92       163     2012      04        02        093              0.158833      16.134186       0.073644       0.200457       0.058000       0.222600   -9999.000000       0.116000
53759     53759     shanxi         110.8333       36.9833           92       163     2012      04        03        094              0.157333      10.185059       0.103987       0.202810   -9999.000000   -9999.000000       0.047800       0.052000
53759     53759     shanxi         110.8333       36.9833           92       163     2012      04        04        095              0.156167      13.237823       0.000000       0.200466       0.056000       0.029100       0.052000   -9999.000000
53759     53759     shanxi         110.8333       36.9833           92       163     2012      04        05        096              0.154042      15.463501       0.335252       0.195174       0.051500   -9999.000000       0.043700       0.038000
53759     53759     shanxi         110.8333       36.9833           92       163     2012      04        06        097              0.151708      15.517944       0.325556       0.191131       0.053000   -9999.000000       0.049100       0.075000
53759     53759     shanxi         110.8333       36.9833           92       163     2012      04        07        098              0.149542      16.134003       0.325268       0.188510       0.055000       0.034300       0.047800       0.197000
53759     53759     shanxi         110.8333       36.9833           92       163     2012      04        08        099              0.146917      17.766327       0.000000       0.185119       0.060000   -9999.000000   -9999.000000       0.055000
53759     53759     shanxi         110.8333       36.9833           92       163     2012      04        09        100              0.142917      19.507111       0.147226       0.181886       0.063000       0.085700       0.044800   -9999.000000
53759     53759     shanxi         110.8333       36.9833           92       163     2012      04        10        101              0.140750      19.451172       0.133438       0.183139       0.059500   -9999.000000       0.057800       0.046000
53759     53759     shanxi         110.8333       36.9833           92       163     2012      04        11        102              0.139458      18.505737       2.275944       0.186681       0.057000   -9999.000000       0.044500       0.531000
53759     53759     shanxi         110.8333       36.9833           92       163     2012      04        12        103              0.149458      13.899689       0.103337       0.202840       0.065000       0.231900       0.058100       0.666000
53759     53759     shanxi         110.8333       36.9833           92       163     2012      04        13        104              0.153625      13.547607       0.000000       0.217865       0.069000   -9999.000000   -9999.000000       0.062000
53759     53759     shanxi         110.8333       36.9833           92       163     2012      04        14        105              0.151208      17.089172       0.000000       0.204074       0.066000       0.126000       0.047600   -9999.000000
53759     53759     shanxi         110.8333       36.9833           92       163     2012      04        15        106              0.148125      17.864471       0.000000       0.195125       0.052500   -9999.000000       0.044000       0.033000
53759     53759     shanxi         110.8333       36.9833           92       163     2012      04        16        107              0.145000      19.238983       0.000000       0.187829       0.049000       0.054100       0.052300       0.057000
53759     53759     shanxi         110.8333       36.9833           92       163     2012      04        17        108              0.141708      19.522522       0.000000       0.182067       0.051000       0.093900       0.045100       0.136000
53759     53759     shanxi         110.8333       36.9833           92       163     2012      04        18        109              0.140583      18.749420       5.805050       0.181476   -9999.000000   -9999.000000   -9999.000000       0.142000
53759     53759     shanxi         110.8333       36.9833           92       163     2012      04        19        110              0.138667      20.206451       0.000000       0.228841       0.063000       0.130800   -9999.000000   -9999.000000
53759     53759     shanxi         110.8333       36.9833           92       163     2012      04        20        111              0.136458      17.272675       0.257651       0.234363       0.055500   -9999.000000       0.047900       0.011000
53759     53759     shanxi         110.8333       36.9833           92       163     2012      04        21        112              0.135750      19.653839       0.000000       0.216845       0.049500   -9999.000000       0.053300       0.036000
53759     53759     shanxi         110.8333       36.9833           92       163     2012      04        22        113              0.135083      21.089203       0.934877       0.201347       0.053000       0.018000   -9999.000000       0.030000
53759     53759     shanxi         110.8333       36.9833           92       163     2012      04        23        114              0.157125      24.174286      10.214455       0.196298       0.051000   -9999.000000       0.051800       0.002000
53759     53759     shanxi         110.8333       36.9833           92       163     2012      04        24        115              0.223875      24.815674       0.198385       0.225045       0.091000       0.056000       0.075000   -9999.000000
53759     53759     shanxi         110.8333       36.9833           92       163     2012      04        25        116              0.000000      16.483795       0.000000       0.263891       0.074000       0.229900       0.066300       0.167000
53759     53759     shanxi         110.8333       36.9833           92       163     2012      04        26        117              0.178417      16.023590       0.000000       0.236770       0.054500   -9999.000000       0.050600   -9999.000000
53759     53759     shanxi         110.8333       36.9833           92       163     2012      04        27        118              0.171333      19.430023       0.000000       0.221163       0.050000       0.085600   -9999.000000       0.055000
53759     53759     shanxi         110.8333       36.9833           92       163     2012      04        28        119              0.165792      21.544891       5.786914       0.206611       0.050000   -9999.000000       0.046000   -9999.000000
53759     53759     shanxi         110.8333       36.9833           92       163     2012      04        29        120              0.160917      22.123383       0.000000       0.245338       0.059000   -9999.000000       0.051500       0.083000
53759     53759     shanxi         110.8333       36.9833           92       163     2012      04        30        121              0.155667      24.452301       0.226367       0.228151       0.061000       0.022700   -9999.000000       0.027000
53759     53759     shanxi         110.8333       36.9833           92       163     2012      05        01        122              0.150958      22.724762       1.048331       0.216495       0.067000   -9999.000000       0.060000       0.105000
53759     53759     shanxi         110.8333       36.9833           92       163     2012      05        02        123              0.150458      19.468689       0.105820       0.229446       0.061500       0.114300       0.059700       0.049000
53759     53759     shanxi         110.8333       36.9833           92       163     2012      05        03        124              0.147083      23.393280       0.000000       0.215268       0.053000   -9999.000000       0.061400   -9999.000000
53759     53759     shanxi         110.8333       36.9833           92       163     2012      05        04        125              0.144000      23.968964       0.000000       0.201179       0.059000   -9999.000000       0.051700       0.021000
53759     53759     shanxi         110.8333       36.9833           92       163     2012      05        05        126              0.140042      25.827606       0.000000       0.189282       0.058000   -9999.000000       0.053200       0.022000
53759     53759     shanxi         110.8333       36.9833           92       163     2012      05        06        127              0.135458      27.076599       0.310630       0.181047       0.046000   -9999.000000   -9999.000000       0.141000
53759     53759     shanxi         110.8333       36.9833           92       163     2012      05        07        128              0.130708      27.825409       0.176694       0.178797   -9999.000000       0.045500       0.062200       0.026000
53759     53759     shanxi         110.8333       36.9833           92       163     2012      05        08        129              0.128542      25.061493       0.073872       0.183417       0.051000       0.047200       0.063500   -9999.000000
53759     53759     shanxi         110.8333       36.9833           92       163     2012      05        09        130              0.123792      28.514801       0.000000       0.177631       0.055000   -9999.000000       0.057100       0.015000
53759     53759     shanxi         110.8333       36.9833           92       163     2012      05        10        131              0.119522      27.882233       2.190062       0.174902   -9999.000000   -9999.000000       0.058800       0.022000
53759     53759     shanxi         110.8333       36.9833           92       163     2012      05        11        132              0.114833      28.353180       0.620338       0.179436       0.076000   -9999.000000       0.072400       0.635000
53759     53759     shanxi         110.8333       36.9833           92       163     2012      05        12        133              0.114083      20.670074       0.000000       0.215700       0.055500       0.048100       0.062800   -9999.000000
53759     53759     shanxi         110.8333       36.9833           92       163     2012      05        13        134              0.113083      19.234497       0.045142       0.195119       0.056000       0.048900       0.055800   -9999.000000
53759     53759     shanxi         110.8333       36.9833           92       163     2012      05        14        135              0.112208      18.114014       0.000000       0.188111       0.052000   -9999.000000       0.072000       0.003000
53759     53759     shanxi         110.8333       36.9833           92       163     2012      05        15        136              0.109708      20.989532       0.000000       0.179805       0.063000   -9999.000000       0.062000   -9999.000000
53759     53759     shanxi         110.8333       36.9833           92       163     2012      05        16        137              0.105917      22.455597       0.079023       0.174041       0.058000   -9999.000000       0.066900       0.006000
53759     53759     shanxi         110.8333       36.9833           92       163     2012      05        17        138              0.103000      22.738342       0.000000       0.171695       0.052500   -9999.000000   -9999.000000   -9999.000000
53759     53759     shanxi         110.8333       36.9833           92       163     2012      05        18        139              0.098375      25.712677       0.065219       0.169530       0.060000       0.048800       0.069100   -9999.000000
53759     53759     shanxi         110.8333       36.9833           92       163     2012      05        19        140              0.094417      28.424194       0.000000       0.168832       0.055000   -9999.000000       0.068000       0.004000
53759     53759     shanxi         110.8333       36.9833           92       163     2012      05        20        141              0.088875      30.171570       2.610536       0.168035   -9999.000000       0.047600       0.082400       0.024000
53759     53759     shanxi         110.8333       36.9833           92       163     2012      05        21        142              0.083500      28.388733       4.977247       0.175605       0.092000   -9999.000000       0.078900       0.635000
53759     53759     shanxi         110.8333       36.9833           92       163     2012      05        22        143              0.086292      18.156708       0.036413       0.252376       0.063500   -9999.000000       0.062000       0.077000
53759     53759     shanxi         110.8333       36.9833           92       163     2012      05        23        144              0.087542      20.776520       0.049524       0.230873   -9999.000000       0.141100   -9999.000000   -9999.000000
53759     53759     shanxi         110.8333       36.9833           92       163     2012      05        24        145              0.087708      21.232452       0.000000       0.210675       0.064000   -9999.000000       0.057900   -9999.000000
53759     53759     shanxi         110.8333       36.9833           92       163     2012      05        25        146              0.000000      22.838287       0.032155       0.195924       0.072000       0.090600       0.065200   -9999.000000
53759     53759     shanxi         110.8333       36.9833           92       163     2012      05        26        147              0.086250      24.883942       0.000000       0.183634       0.064000   -9999.000000       0.055200       0.001000
53759     53759     shanxi         110.8333       36.9833           92       163     2012      05        27        148              0.084500      26.892975       0.000000       0.176166       0.063000   -9999.000000       0.058800   -9999.000000
53759     53759     shanxi         110.8333       36.9833           92       163     2012      05        28        149              0.094042      28.592957      22.719330       0.171714       0.051000       0.054300   -9999.000000   -9999.000000
53759     53759     shanxi         110.8333       36.9833           92       163     2012      05        29        150              0.170792      25.940582       0.061968       0.239958       0.061000   -9999.000000       0.072700       0.382000
53759     53759     shanxi         110.8333       36.9833           92       163     2012      05        30        151              0.154042      22.373840       0.000000       0.288892       0.058000   -9999.000000       0.059300   -9999.000000
53759     53759     shanxi         110.8333       36.9833           92       163     2012      05        31        152              0.138042      23.764954       0.145214       0.256024       0.072000       0.120300       0.055500   -9999.000000
53759     53759     shanxi         110.8333       36.9833           92       163     2012      06        01        153              0.128833      23.980927       0.235723       0.242169       0.065500       0.151900       0.059800   -9999.000000
53759     53759     shanxi         110.8333       36.9833           92       163     2012      06        02        154              0.118208      24.489594       0.347880       0.227325       0.057500       0.091100       0.060200       0.023000
53759     53759     shanxi         110.8333       36.9833           92       163     2012      06        03        155              0.110625      24.909882       0.000000       0.217402       0.057000   -9999.000000   -9999.000000       0.037000
53759     53759     shanxi         110.8333       36.9833           92       163     2012      06        04        156              0.103583      25.653320       0.000000       0.206954       0.054000       0.150800       0.087800       0.055000
53759     53759     shanxi         110.8333       36.9833           92       163     2012      06        05        157              0.095458      27.706818       3.078618       0.193797   -9999.000000       0.053900       0.096300       0.022000
53759     53759     shanxi         110.8333       36.9833           92       163     2012      06        06        158              0.090208      26.062378       0.512296       0.207857       0.067000   -9999.000000       0.086700   -9999.000000
53759     53759     shanxi         110.8333       36.9833           92       163     2012      06        07        159              0.089625      21.245636       3.225009       0.232510       0.067000       0.092100       0.085100       0.031000
53759     53759     shanxi         110.8333       36.9833           92       163     2012      06        08        160              0.088667      24.002930       0.000000       0.241689       0.065000   -9999.000000       0.088600       0.086000
53759     53759     shanxi         110.8333       36.9833           92       163     2012      06        09        161              0.088375      24.255371       0.000000       0.225905       0.053000   -9999.000000   -9999.000000       0.232000
53759     53759     shanxi         110.8333       36.9833           92       163     2012      06        10        162              0.084792      28.022583       0.000000       0.201419       0.061000       0.194700       0.084400       0.005000
53759     53759     shanxi         110.8333       36.9833           92       163     2012      06        11        163              0.000000      25.077026       0.000000       0.187307       0.059000   -9999.000000       0.095000   -9999.000000
53759     53759     shanxi         110.8333       36.9833           92       163     2012      06        12        164              0.080042      26.962738       0.000000       0.179235       0.054000       0.197400       0.084900       0.016000
53759     53759     shanxi         110.8333       36.9833           92       163     2012      06        13        165              0.077292      28.960999       0.513334       0.174507       0.050000   -9999.000000       0.088600       0.037000
53759     53759     shanxi         110.8333       36.9833           92       163     2012      06        14        166              0.075792      28.377167       0.000000       0.176343       0.054000       0.049600   -9999.000000       0.100000
53759     53759     shanxi         110.8333       36.9833           92       163     2012      06        15        167              0.074667      26.330994       0.000000       0.173769       0.057000       0.122100       0.094400       0.045000
53759     53759     shanxi         110.8333       36.9833           92       163     2012      06        16        168              0.073417      27.026062       0.000000       0.171627       0.060000   -9999.000000       0.087000   -9999.000000
53759     53759     shanxi         110.8333       36.9833           92       163     2012      06        17        169              0.072083      29.463562       0.000000       0.169455       0.054000   -9999.000000       0.093600       0.053000
53759     53759     shanxi         110.8333       36.9833           92       163     2012      06        18        170              0.070667      31.098389       0.000000       0.168274       0.053500       0.040100       0.078700       0.100000
53759     53759     shanxi         110.8333       36.9833           92       163     2012      06        19        171              0.068958      32.012085       2.776119       0.167490       0.063000   -9999.000000       0.083100       0.447000
53759     53759     shanxi         110.8333       36.9833           92       163     2012      06        20        172              0.068417      27.410828       1.585956       0.196700       0.057000       0.100400   -9999.000000       0.223000
53759     53759     shanxi         110.8333       36.9833           92       163     2012      06        21        173              0.068208      27.965759       0.046778       0.201516       0.066000   -9999.000000       0.084300   -9999.000000
53759     53759     shanxi         110.8333       36.9833           92       163     2012      06        22        174              0.068125      28.918091       1.547139       0.185266       0.064000   -9999.000000       0.101000       0.109000
53759     53759     shanxi         110.8333       36.9833           92       163     2012      06        23        175              0.080833      31.740662      30.524115       0.183803       0.056000       0.088100       0.083500   -9999.000000
53759     53759     shanxi         110.8333       36.9833           92       163     2012      06        24        176              0.196208      29.750916       0.817496       0.259446       0.092000       0.317300       0.116900       0.790000
53759     53759     shanxi         110.8333       36.9833           92       163     2012      06        25        177              0.170375      26.236115       0.000000       0.311558       0.081000       0.254000       0.119600   -9999.000000
53759     53759     shanxi         110.8333       36.9833           92       163     2012      06        26        178              0.153750      26.002289       0.000000       0.281678       0.077000   -9999.000000   -9999.000000       0.825000
53759     53759     shanxi         110.8333       36.9833           92       163     2012      06        27        179              0.140875      24.858124       9.095133       0.269056   -9999.000000   -9999.000000       0.123900       0.411000
53759     53759     shanxi         110.8333       36.9833           92       163     2012      06        28        180              0.184917      23.980591      31.351353       0.281178   -9999.000000       0.364200       0.121200       0.893000
53759     53759     shanxi         110.8333       36.9833           92       163     2012      06        29        181              0.224875      21.626984       3.920829       0.353310       0.104000   -9999.000000       0.134900       1.000000
53759     53759     shanxi         110.8333       36.9833           92       163     2012      06        30        182              0.192083      24.740143       0.000000       0.343262       0.066000   -9999.000000       0.116300   -9999.000000
53759     53759     shanxi         110.8333       36.9833           92       163     2012      07        01        183              0.171958      26.350311       0.000000       0.313868       0.077000       0.137600   -9999.000000       0.742000
53759     53759     shanxi         110.8333       36.9833           92       163     2012      07        02        184              0.153292      27.856964       0.000000       0.297516       0.073000       0.142600       0.108400       0.368000
53759     53759     shanxi         110.8333       36.9833           92       163     2012      07        03        185              0.135625      28.379242       2.454113       0.282770       0.063000       0.220900       0.119100       0.351000
53759     53759     shanxi         110.8333       36.9833           92       163     2012      07        04        186              0.124375      28.177643       0.406441       0.284062       0.065500   -9999.000000       0.115400       0.292000
53759     53759     shanxi         110.8333       36.9833           92       163     2012      07        05        187              0.115458      26.240448       0.000000       0.279833       0.058000       0.121500       0.096900   -9999.000000
53759     53759     shanxi         110.8333       36.9833           92       163     2012      07        06        188              0.104542      29.118530       0.202443       0.264154   -9999.000000       0.146100       0.100100       0.192000
53759     53759     shanxi         110.8333       36.9833           92       163     2012      07        07        189              0.099750      28.423340       0.424715       0.253509   -9999.000000   -9999.000000   -9999.000000       0.248000
53759     53759     shanxi         110.8333       36.9833           92       163     2012      07        08        190              0.157174      27.240082      12.551357       0.254397       0.103000       0.030000       0.131200       0.547000
53759     53759     shanxi         110.8333       36.9833           92       163     2012      07        09        191              0.196875      24.232422       0.592864       0.312902       0.080000   -9999.000000       0.136900       0.900000
53759     53759     shanxi         110.8333       36.9833           92       163     2012      07        10        192              0.183417      24.963654       0.411716       0.300252       0.058000   -9999.000000       0.118300   -9999.000000
53759     53759     shanxi         110.8333       36.9833           92       163     2012      07        11        193              0.164500      28.469940       0.000000       0.283399       0.068000       0.026200       0.114000       0.457000
53759     53759     shanxi         110.8333       36.9833           92       163     2012      07        12        194              0.147458      28.846985       0.000000       0.265710       0.080000   -9999.000000       0.107600       0.240000
53759     53759     shanxi         110.8333       36.9833           92       163     2012      07        13        195              0.142125      29.159851       3.569735       0.249122   -9999.000000       0.096700       0.135500       0.286000
53759     53759     shanxi         110.8333       36.9833           92       163     2012      07        14        196              0.174292      28.315796      15.096414       0.256569       0.071000   -9999.000000       0.133600       0.362000
53759     53759     shanxi         110.8333       36.9833           92       163     2012      07        15        197              0.233417      27.542908       0.239577       0.278031       0.088000   -9999.000000       0.139600   -9999.000000
53759     53759     shanxi         110.8333       36.9833           92       163     2012      07        16        198              0.201500      26.666901       0.000000       0.295253       0.073000       0.100400       0.126200       0.644000
53759     53759     shanxi         110.8333       36.9833           92       163     2012      07        17        199              0.183250      27.121246       0.000000       0.272156       0.088000   -9999.000000       0.122100       0.311000
53759     53759     shanxi         110.8333       36.9833           92       163     2012      07        18        200              0.167708      26.901093       0.000000       0.258892       0.083000       0.038500   -9999.000000       0.191000
53759     53759     shanxi         110.8333       36.9833           92       163     2012      07        19        201              0.151417      27.356659       0.000000       0.248281       0.066000   -9999.000000       0.116800       0.107000
53759     53759     shanxi         110.8333       36.9833           92       163     2012      07        20        202              0.138826      28.633698       4.759903       0.237238       0.065500   -9999.000000       0.136300   -9999.000000
53759     53759     shanxi         110.8333       36.9833           92       163     2012      07        21        203              0.220708      28.317474      24.991953       0.256535   -9999.000000       0.237400       0.154900       0.969000
53759     53759     shanxi         110.8333       36.9833           92       163     2012      07        22        204              0.217167      24.138031       0.000000       0.345288       0.088000   -9999.000000       0.133900   -9999.000000
53759     53759     shanxi         110.8333       36.9833           92       163     2012      07        23        205              0.199083      26.402374       0.208168       0.308986       0.099000       0.276300       0.128700       0.599000
53759     53759     shanxi         110.8333       36.9833           92       163     2012      07        24        206              0.222833      25.145020       6.093428       0.299111       0.109000       0.341600   -9999.000000   -9999.000000
53759     53759     shanxi         110.8333       36.9833           92       163     2012      07        25        207              0.205167      24.064270       0.801889       0.319012       0.092000       0.049100       0.128000       0.920000
53759     53759     shanxi         110.8333       36.9833           92       163     2012      07        26        208              0.213417      27.855957      10.702399       0.300684       0.087000       0.177500       0.136100       0.866000
53759     53759     shanxi         110.8333       36.9833           92       163     2012      07        27        209              0.203083      28.138855       9.539340       0.312631       0.095000   -9999.000000       0.125100       0.817000
53759     53759     shanxi         110.8333       36.9833           92       163     2012      07        28        210              0.204458      28.451141       1.400881       0.321094       0.103000       0.143900       0.129200       0.640000
53759     53759     shanxi         110.8333       36.9833           92       163     2012      07        29        211              0.184458      29.480530       0.267733       0.320073       0.095000       0.237600   -9999.000000   -9999.000000
53759     53759     shanxi         110.8333       36.9833           92       163     2012      07        30        212              0.216500      30.309113      26.853519       0.298030       0.102500   -9999.000000       0.152600       0.611000
53759     53759     shanxi         110.8333       36.9833           92       163     2012      07        31        213              0.251833      25.466431       5.181199       0.348464       0.105000       0.255000       0.131800       0.927000
53759     53759     shanxi         110.8333       36.9833           92       163     2012      08        01        214              0.226500      23.789398       0.256132       0.348107       0.099000   -9999.000000       0.138700       0.895000
53759     53759     shanxi         110.8333       36.9833           92       163     2012      08        02        215              0.206750      25.732178       0.695361       0.333464       0.085000   -9999.000000       0.123700       0.644000
53759     53759     shanxi         110.8333       36.9833           92       163     2012      08        03        216              0.190333      27.587524       0.000000       0.320819       0.102000       0.207400       0.121300   -9999.000000
53759     53759     shanxi         110.8333       36.9833           92       163     2012      08        04        217              0.176000      28.068115       0.000000       0.307506       0.087000   -9999.000000   -9999.000000       0.500000
53759     53759     shanxi         110.8333       36.9833           92       163     2012      08        05        218              0.165042      28.584076       0.105576       0.296474       0.081000       0.148500       0.113900       0.430000
53759     53759     shanxi         110.8333       36.9833           92       163     2012      08        06        219              0.155500      27.389648       0.000000       0.291722       0.085000   -9999.000000       0.126300       0.387000
53759     53759     shanxi         110.8333       36.9833           92       163     2012      08        07        220              0.142958      28.000214       0.000000       0.281819       0.075000       0.245100       0.117000       0.291000
53759     53759     shanxi         110.8333       36.9833           92       163     2012      08        08        221              0.135125      29.679382       2.500789       0.273210       0.101000       0.283500       0.125000   -9999.000000
53759     53759     shanxi         110.8333       36.9833           92       163     2012      08        09        222              0.126522      28.308075       0.000000       0.281525       0.098000   -9999.000000       0.124700       0.476000
53759     53759     shanxi         110.8333       36.9833           92       163     2012      08        10        223              0.116417      26.912811       0.000000       0.269007       0.080000       0.085000   -9999.000000       0.261000
53759     53759     shanxi         110.8333       36.9833           92       163     2012      08        11        224              0.112167      27.875092       4.550059       0.255021       0.107000       0.017500       0.134200       0.286000
53759     53759     shanxi         110.8333       36.9833           92       163     2012      08        12        225              0.139625      27.776154       0.105846       0.269734       0.109000       0.148800       0.135600       0.527000
53759     53759     shanxi         110.8333       36.9833           92       163     2012      08        13        226              0.141833      25.256836       3.298451       0.279186       0.129000       0.117100       0.129000   -9999.000000
53759     53759     shanxi         110.8333       36.9833           92       163     2012      08        14        227              0.195375      25.133667       8.898786       0.276529       0.131000   -9999.000000       0.151400       0.838000
53759     53759     shanxi         110.8333       36.9833           92       163     2012      08        15        228              0.188958      23.804413       0.608589       0.318400       0.100000   -9999.000000   -9999.000000       0.361000
53759     53759     shanxi         110.8333       36.9833           92       163     2012      08        16        229              0.172875      26.114319       2.354551       0.292315       0.096000       0.024100       0.116300       0.243000
53759     53759     shanxi         110.8333       36.9833           92       163     2012      08        17        230              0.279542      27.055420      62.967438       0.284906       0.136000       0.458400       0.145300       1.000000
53759     53759     shanxi         110.8333       36.9833           92       163     2012      08        18        231              0.250375      22.596497       3.912716       0.394131   -9999.000000       0.204600       0.152600   -9999.000000
53759     53759     shanxi         110.8333       36.9833           92       163     2012      08        19        232              0.223292      22.660034       0.000000       0.359453       0.135000   -9999.000000       0.144800       0.847000
53759     53759     shanxi         110.8333       36.9833           92       163     2012      08        20        233              0.209625      24.921722       0.075370       0.339054       0.117000       0.312100       0.155900   -9999.000000
53759     53759     shanxi         110.8333       36.9833           92       163     2012      08        21        234              0.193292      24.452637       1.405121       0.330096       0.098000       0.290600   -9999.000000       0.839000
53759     53759     shanxi         110.8333       36.9833           92       163     2012      08        22        235              0.178250      21.232727       7.087473       0.318531       0.093000   -9999.000000       0.136000   -9999.000000
53759     53759     shanxi         110.8333       36.9833           92       163     2012      08        23        236              0.166333      22.063416       0.000000       0.311719       0.090000       0.107300       0.147900       0.458000
53759     53759     shanxi         110.8333       36.9833           92       163     2012      08        24        237              0.154667      22.087311       0.000000       0.304480   -9999.000000   -9999.000000       0.127100       0.307000
53759     53759     shanxi         110.8333       36.9833           92       163     2012      08        25        238              0.000000      23.544006       3.524603       0.298129   -9999.000000       0.106800       0.130800   -9999.000000
53759     53759     shanxi         110.8333       36.9833           92       163     2012      08        26        239              0.144542      24.402008       1.290723       0.299035       0.101000       0.211100       0.141700       0.452000
53759     53759     shanxi         110.8333       36.9833           92       163     2012      08        27        240              0.147167      24.113831       0.499925       0.311035       0.098000   -9999.000000   -9999.000000   -9999.000000
53759     53759     shanxi         110.8333       36.9833           92       163     2012      08        28        241              0.143083      24.677643       0.000000       0.299522       0.086000       0.058900       0.114200       0.544000
53759     53759     shanxi         110.8333       36.9833           92       163     2012      08        29        242              0.136083      25.758636       0.000000       0.290408       0.089000       0.236300       0.121500       0.389000
53759     53759     shanxi         110.8333       36.9833           92       163     2012      08        30        243              0.126000      25.973541       0.076818       0.281829       0.103000       0.060000       0.106700       0.427000
53759     53759     shanxi         110.8333       36.9833           92       163     2012      08        31        244              0.120792      24.768158      12.659043       0.273786   -9999.000000       0.084300       0.115100       0.257000
53759     53759     shanxi         110.8333       36.9833           92       163     2012      09        01        245              0.259042      23.375580      54.609955       0.294035       0.133000   -9999.000000   -9999.000000   -9999.000000
53759     53759     shanxi         110.8333       36.9833           92       163     2012      09        02        246              0.232667      18.730896       0.000000       0.391457       0.118000       0.134300       0.133400       0.949000
53759     53759     shanxi         110.8333       36.9833           92       163     2012      09        03        247              0.212667      20.255920       0.000000       0.350390       0.103000       0.119700       0.124500       0.762000
53759     53759     shanxi         110.8333       36.9833           92       163     2012      09        04        248              0.199000      20.183594       0.632212       0.337070       0.126000   -9999.000000       0.130900       0.787000
53759     53759     shanxi         110.8333       36.9833           92       163     2012      09        05        249              0.191125      21.460968      11.470246       0.329135       0.123000       0.222500       0.117600       0.679000
53759     53759     shanxi         110.8333       36.9833           92       163     2012      09        06        250              0.263833      21.990326      23.449482       0.337983       0.130000   -9999.000000       0.135600   -9999.000000
53759     53759     shanxi         110.8333       36.9833           92       163     2012      09        07        251              0.228833      18.484344       0.000000       0.375419       0.131000   -9999.000000   -9999.000000       0.954000
53759     53759     shanxi         110.8333       36.9833           92       163     2012      09        08        252              0.213875      21.192047       0.149812       0.347885       0.117000       0.289800       0.124200       0.860000
53759     53759     shanxi         110.8333       36.9833           92       163     2012      09        09        253              0.202500      22.298889       0.061212       0.337648       0.123000   -9999.000000       0.132400       0.893000
53759     53759     shanxi         110.8333       36.9833           92       163     2012      09        10        254              0.205958      22.075562       5.932567       0.329303       0.129000       0.145000       0.127900       0.914000
53759     53759     shanxi         110.8333       36.9833           92       163     2012      09        11        255              0.203000      18.962769       1.861000       0.342423       0.114000   -9999.000000       0.123800   -9999.000000
53759     53759     shanxi         110.8333       36.9833           92       163     2012      09        12        256              0.192958      19.380249       0.000000       0.335722       0.112000       0.130100       0.127000       0.799000
53759     53759     shanxi         110.8333       36.9833           92       163     2012      09        13        257              0.185167      15.705383       0.000000       0.327568       0.095000       0.423000       0.129000       0.576000
53759     53759     shanxi         110.8333       36.9833           92       163     2012      09        14        258              0.177625      17.054169       0.000000       0.321181       0.090000   -9999.000000       0.115000       0.409000
53759     53759     shanxi         110.8333       36.9833           92       163     2012      09        15        259              0.171458      18.107269       0.120099       0.315966       0.111000       0.360100       0.125100       0.462000
53759     53759     shanxi         110.8333       36.9833           92       163     2012      09        16        260              0.165250      18.512024       0.000000       0.311569       0.109000       0.136100       0.109600   -9999.000000
53759     53759     shanxi         110.8333       36.9833           92       163     2012      09        17        261              0.161167      18.566345       0.226679       0.308821       0.098000       0.125100       0.109200       0.438000
53759     53759     shanxi         110.8333       36.9833           92       163     2012      09        18        262              0.158833      18.733185       0.141321       0.307515       0.103000       0.185600   -9999.000000   -9999.000000
53759     53759     shanxi         110.8333       36.9833           92       163     2012      09        19        263              0.155750      19.606995       0.000000       0.303836       0.090000   -9999.000000       0.101500       0.358000
53759     53759     shanxi         110.8333       36.9833           92       163     2012      09        20        264              0.151750      20.516541       6.215788       0.299227       0.125000       0.084300       0.124100   -9999.000000
53759     53759     shanxi         110.8333       36.9833           92       163     2012      09        21        265              0.164542      19.197723       0.191576       0.308806   -9999.000000       0.079900       0.122300       0.788000
53759     53759     shanxi         110.8333       36.9833           92       163     2012      09        22        266              0.164208      18.786774       0.000000       0.318397       0.096000       0.077400       0.105700       0.601000
53759     53759     shanxi         110.8333       36.9833           92       163     2012      09        23        267              0.159542      19.228027       0.000000       0.308619       0.087500       0.096200       0.112800       0.538000
53759     53759     shanxi         110.8333       36.9833           92       163     2012      09        24        268              0.154958      20.324738       3.700014       0.303061       0.091000   -9999.000000   -9999.000000       0.383000
53759     53759     shanxi         110.8333       36.9833           92       163     2012      09        25        269              0.195583      20.020691      17.517035       0.310359   -9999.000000       0.144600       0.127200   -9999.000000
53759     53759     shanxi         110.8333       36.9833           92       163     2012      09        26        270              0.203083      15.704773       0.141248       0.353432       0.118000       0.106100       0.129600       0.847000
53759     53759     shanxi         110.8333       36.9833           92       163     2012      09        27        271              0.195500      16.747467       0.000000       0.332186       0.112500   -9999.000000       0.119900       0.630000
53759     53759     shanxi         110.8333       36.9833           92       163     2012      09        28        272              0.177600      15.571167       0.000000       0.319979       0.097000   -9999.000000       0.124800       0.626000
53759     53759     shanxi         110.8333       36.9833           92       163     2012      09        29        273              0.173000      13.998169       0.000000       0.314003       0.092000   -9999.000000       0.117000       0.337000
53759     53759     shanxi         110.8333       36.9833           92       163     2012      09        30        274              0.166875      14.629608       1.809394       0.309918       0.085000   -9999.000000       0.127600   -9999.000000
53759     53759     shanxi         110.8333       36.9833           92       163     2012      10        01        275              0.161667      14.879059       0.000000       0.305920       0.098000       0.175900       0.093600       0.448000
53759     53759     shanxi         110.8333       36.9833           92       163     2012      10        02        276              0.156375      16.706573       0.000000       0.302526       0.091000       0.146100       0.104700       0.411000
53759     53759     shanxi         110.8333       36.9833           92       163     2012      10        03        277              0.151917      17.802582       0.000000       0.300034       0.079000       0.067800       0.089800       0.514000
53759     53759     shanxi         110.8333       36.9833           92       163     2012      10        04        278              0.147750      17.906281       3.849387       0.296290       0.095000       0.122400       0.110000       0.770000
53759     53759     shanxi         110.8333       36.9833           92       163     2012      10        05        279              0.149875      14.318970       0.162744       0.310978       0.084000       0.266600   -9999.000000   -9999.000000
53759     53759     shanxi         110.8333       36.9833           92       163     2012      10        06        280              0.146833      14.836914       0.000000       0.306335   -9999.000000       0.111300       0.101200       0.585000
53759     53759     shanxi         110.8333       36.9833           92       163     2012      10        07        281              0.142583      15.979797       0.033414       0.299624       0.099000   -9999.000000       0.103200       0.406000
53759     53759     shanxi         110.8333       36.9833           92       163     2012      10        08        282              0.141042      14.683258       1.536160       0.299478       0.087000       0.119600       0.099400       0.494000
53759     53759     shanxi         110.8333       36.9833           92       163     2012      10        09        283              0.138667      15.790222       0.000000       0.302450       0.083000       0.087800       0.086700       0.386000
53759     53759     shanxi         110.8333       36.9833           92       163     2012      10        10        284              0.136958      13.666534       0.000000       0.297547       0.081000       0.089400       0.094500   -9999.000000
53759     53759     shanxi         110.8333       36.9833           92       163     2012      10        11        285              0.133583      14.631226       0.146759       0.293287       0.070000       0.134100   -9999.000000       0.440000
53759     53759     shanxi         110.8333       36.9833           92       163     2012      10        12        286              0.131208      15.932587       0.202022       0.291256       0.082000   -9999.000000       0.084800       0.313000
53759     53759     shanxi         110.8333       36.9833           92       163     2012      10        13        287              0.128750      15.627472       0.000000       0.288319       0.081000       0.233200       0.098300       0.260000
53759     53759     shanxi         110.8333       36.9833           92       163     2012      10        14        288              0.127000      15.136322       0.835350       0.285419       0.075000       0.070800       0.085700       0.572000
53759     53759     shanxi         110.8333       36.9833           92       163     2012      10        15        289              0.125875      15.125244       2.907125       0.288090       0.088000       0.132700       0.098700   -9999.000000
53759     53759     shanxi         110.8333       36.9833           92       163     2012      10        16        290              0.128083      14.087982       0.071477       0.295903       0.080000       0.188100   -9999.000000       0.498000
53759     53759     shanxi         110.8333       36.9833           92       163     2012      10        17        291              0.129417      10.086578       0.078321       0.294587   -9999.000000   -9999.000000       0.106200   -9999.000000
53759     53759     shanxi         110.8333       36.9833           92       163     2012      10        18        292              0.125417      10.601746       0.105577       0.289001   -9999.000000       0.117700       0.086500       0.315000
53759     53759     shanxi         110.8333       36.9833           92       163     2012      10        19        293              0.118625      10.185974       0.000000       0.288331       0.078000       0.150900       0.102500   -9999.000000
53759     53759     shanxi         110.8333       36.9833           92       163     2012      10        20        294              0.119583      12.727600       0.000000       0.286189       0.075000   -9999.000000       0.090700       0.307000
53759     53759     shanxi         110.8333       36.9833           92       163     2012      10        21        295              0.119542      15.037933       5.748478       0.285051   -9999.000000       0.030900       0.111600       0.674000
53759     53759     shanxi         110.8333       36.9833           92       163     2012      10        22        296              0.125667       8.106873       0.088451       0.310846   -9999.000000   -9999.000000   -9999.000000       0.734000
53759     53759     shanxi         110.8333       36.9833           92       163     2012      10        23        297              0.127750       8.799927       0.445030       0.300591   -9999.000000       0.137200       0.087400       0.384000
53759     53759     shanxi         110.8333       36.9833           92       163     2012      10        24        298              0.128750       8.985962       0.000000       0.296724   -9999.000000       0.212200       0.096500   -9999.000000
53759     53759     shanxi         110.8333       36.9833           92       163     2012      10        25        299              0.000000      10.537750       0.000000       0.292874       0.077500   -9999.000000       0.083300       0.458000
53759     53759     shanxi         110.8333       36.9833           92       163     2012      10        26        300              0.127333      11.427490       0.239850       0.290272       0.084000       0.115300       0.095300       0.460000
53759     53759     shanxi         110.8333       36.9833           92       163     2012      10        27        301              0.126750       9.154968       0.000000       0.293246       0.068000       0.135200       0.094000       0.567000
53759     53759     shanxi         110.8333       36.9833           92       163     2012      10        28        302              0.000000      10.202637       0.295083       0.291174       0.087000       0.141200   -9999.000000       0.418000
53759     53759     shanxi         110.8333       36.9833           92       163     2012      10        29        303              0.124042      11.467621       0.000000       0.289760   -9999.000000       0.057300       0.068200   -9999.000000
53759     53759     shanxi         110.8333       36.9833           92       163     2012      10        30        304              0.121292       9.821533       0.000000       0.286478       0.069000   -9999.000000       0.080600       0.231000
53759     53759     shanxi         110.8333       36.9833           92       163     2012      10        31        305              0.120708       7.680481       0.000000       0.284009       0.072000   -9999.000000       0.071100       0.268000
53759     53759     shanxi         110.8333       36.9833           92       163     2012      11        01        306              0.120375       7.930237       0.000000       0.283017       0.069000       0.004200       0.079400       0.372000
53759     53759     shanxi         110.8333       36.9833           92       163     2012      11        02        307              0.120667       8.770874       3.409027       0.282790   -9999.000000   -9999.000000   -9999.000000       0.244000
53759     53759     shanxi         110.8333       36.9833           92       163     2012      11        03        308              0.131208      10.398529       0.317768       0.288301   -9999.000000       0.166200       0.070100   -9999.000000
53759     53759     shanxi         110.8333       36.9833           92       163     2012      11        04        309              0.138000       2.651917       1.408837       0.264665       0.082000   -9999.000000       0.066000       0.631000
53759     53759     shanxi         110.8333       36.9833           92       163     2012      11        05        310              0.138750       0.871216       0.195137       0.240419       0.077000   -9999.000000       0.068700       0.425000
53759     53759     shanxi         110.8333       36.9833           92       163     2012      11        06        311              0.171042       1.956879       0.065354       0.257065       0.082000       0.074300       0.079600       0.524000
53759     53759     shanxi         110.8333       36.9833           92       163     2012      11        07        312              0.191125       4.647644       0.093623       0.285427       0.081000       0.067700       0.085500       0.511000
53759     53759     shanxi         110.8333       36.9833           92       163     2012      11        08        313              0.186958       3.939758       0.000000       0.284720   -9999.000000       0.014900   -9999.000000   -9999.000000
53759     53759     shanxi         110.8333       36.9833           92       163     2012      11        09        314              0.188125       6.104492       1.082947       0.288128       0.103000   -9999.000000       0.076800       0.780000
53759     53759     shanxi         110.8333       36.9833           92       163     2012      11        10        315              0.198917       4.691437       0.240254       0.294458       0.094000       0.134400       0.068000       0.509000
53759     53759     shanxi         110.8333       36.9833           92       163     2012      11        11        316              0.188208       2.637726       0.106947       0.270380       0.093000       0.066900       0.075000       0.300000
53759     53759     shanxi         110.8333       36.9833           92       163     2012      11        12        317              0.189583       2.263550       0.000000       0.255791       0.084000   -9999.000000       0.081000       0.488000
53759     53759     shanxi         110.8333       36.9833           92       163     2012      11        13        318              0.000000       3.326965       0.000000       0.271908   -9999.000000       0.018800       0.074300   -9999.000000
53759     53759     shanxi         110.8333       36.9833           92       163     2012      11        14        319              0.181609       3.291779       0.000000       0.266787   -9999.000000       0.050100       0.076800       0.328000
53759     53759     shanxi         110.8333       36.9833           92       163     2012      11        15        320              0.186250       3.883698       0.739460       0.278266   -9999.000000   -9999.000000       0.053600   -9999.000000
53759     53759     shanxi         110.8333       36.9833           92       163     2012      11        16        321              0.188958       2.087067       0.635864       0.273282   -9999.000000       0.054400       0.059000       0.448000
53759     53759     shanxi         110.8333       36.9833           92       163     2012      11        17        322              0.000000       2.065796       0.000000       0.259742       0.079000   -9999.000000       0.075000   -9999.000000
53759     53759     shanxi         110.8333       36.9833           92       163     2012      11        18        323              0.194125       3.122650       0.000000       0.276056       0.087000       0.139300       0.079500       0.587000
53759     53759     shanxi         110.8333       36.9833           92       163     2012      11        19        324              0.186375       3.778748       0.000000       0.275782   -9999.000000       0.037000   -9999.000000       0.540000
53759     53759     shanxi         110.8333       36.9833           92       163     2012      11        20        325              0.187583       3.875336       0.165806       0.282320   -9999.000000   -9999.000000       0.072600       0.627000
53759     53759     shanxi         110.8333       36.9833           92       163     2012      11        21        326              0.184042       3.884583       0.000000       0.289728       0.075000       0.200500       0.070300       0.523000
53759     53759     shanxi         110.8333       36.9833           92       163     2012      11        22        327              0.179042       6.062073       0.000000       0.290229       0.086000   -9999.000000       0.066300   -9999.000000
53759     53759     shanxi         110.8333       36.9833           92       163     2012      11        23        328              0.168958       2.649445       0.000000       0.271957       0.077000       0.142000       0.061500       0.417000
53759     53759     shanxi         110.8333       36.9833           92       163     2012      11        24        329              0.159583       2.115753       0.000000       0.249531   -9999.000000       0.131000       0.072800       0.426000
53759     53759     shanxi         110.8333       36.9833           92       163     2012      11        25        330              0.160583       2.658691       0.132225       0.268878   -9999.000000   -9999.000000   -9999.000000       0.361000
53759     53759     shanxi         110.8333       36.9833           92       163     2012      11        26        331              0.140875       1.832916       0.000000       0.247796       0.066000       0.006500   -9999.000000       0.087000
53759     53759     shanxi         110.8333       36.9833           92       163     2012      11        27        332              0.126583       1.462585       0.000000       0.236693       0.070000   -9999.000000       0.057200   -9999.000000
53759     53759     shanxi         110.8333       36.9833           92       163     2012      11        28        333              0.099792       2.310089       0.000000       0.247583       0.066000       0.077300       0.051600       0.057000
53759     53759     shanxi         110.8333       36.9833           92       163     2012      11        29        334              0.077375      -0.478149       0.000000       0.208872   -9999.000000       0.055500       0.054700       0.009000
53759     53759     shanxi         110.8333       36.9833           92       163     2012      11        30        335              0.076750      -0.298706       0.125792       0.206684   -9999.000000   -9999.000000   -9999.000000       0.135000
53759     53759     shanxi         110.8333       36.9833           92       163     2012      12        01        336              0.079208       0.660217       0.306824       0.219444       0.067000       0.006500       0.059800       0.048000
53759     53759     shanxi         110.8333       36.9833           92       163     2012      12        02        337              0.078500       0.690155       0.209669       0.227365       0.067000   -9999.000000       0.049400   -9999.000000
53759     53759     shanxi         110.8333       36.9833           92       163     2012      12        03        338              0.073208       0.340973       0.000000       0.223708       0.068000   -9999.000000       0.053800       0.030000
53759     53759     shanxi         110.8333       36.9833           92       163     2012      12        04        339              0.075250      -0.394989       0.000000       0.205686       0.067000       0.021800       0.050800       0.019000
53759     53759     shanxi         110.8333       36.9833           92       163     2012      12        05        340              0.070792       0.437042       0.000000       0.221698   -9999.000000   -9999.000000       0.051200   -9999.000000
53759     53759     shanxi         110.8333       36.9833           92       163     2012      12        06        341              0.071917      -1.109131       1.855234       0.196200   -9999.000000       0.133900   -9999.000000   -9999.000000
53759     53759     shanxi         110.8333       36.9833           92       163     2012      12        07        342              0.069542       0.174927       0.000000       0.220475       0.064000       0.048900       0.047000   -9999.000000
53759     53759     shanxi         110.8333       36.9833           92       163     2012      12        08        343              0.065375      -0.835815       0.000000       0.205230       0.073000       0.034500       0.054000   -9999.000000
53759     53759     shanxi         110.8333       36.9833           92       163     2012      12        09        344              0.065250      -3.575500       0.225985       0.167486       0.066000       0.066400       0.046500   -9999.000000
53759     53759     shanxi         110.8333       36.9833           92       163     2012      12        10        345              0.066333      -1.963043       0.000000       0.182936   -9999.000000   -9999.000000       0.047300       0.002000
53759     53759     shanxi         110.8333       36.9833           92       163     2012      12        11        346              0.067708      -1.355865       0.000000       0.193915   -9999.000000   -9999.000000       0.052600   -9999.000000
53759     53759     shanxi         110.8333       36.9833           92       163     2012      12        12        347              0.070500      -0.575775       0.921512       0.199175       0.060000       0.019200   -9999.000000   -9999.000000
53759     53759     shanxi         110.8333       36.9833           92       163     2012      12        13        348              0.071375       0.164734       0.236041       0.208784   -9999.000000       0.082500       0.051800       0.069000
53759     53759     shanxi         110.8333       36.9833           92       163     2012      12        14        349              0.072458      -0.416290       9.900577       0.199907       0.075000       0.015900       0.055300   -9999.000000
53759     53759     shanxi         110.8333       36.9833           92       163     2012      12        15        350              0.000000       0.170197       0.100286       0.215655       0.077000   -9999.000000       0.054500       0.080000
53759     53759     shanxi         110.8333       36.9833           92       163     2012      12        16        351              0.074708       0.354950       0.000000       0.215622   -9999.000000   -9999.000000       0.060400   -9999.000000
53759     53759     shanxi         110.8333       36.9833           92       163     2012      12        17        352              0.069792       0.494629       0.000000       0.223263       0.064000       0.012900   -9999.000000       0.087000
53759     53759     shanxi         110.8333       36.9833           92       163     2012      12        18        353              0.066917      -1.207916       0.000000       0.197971       0.060000       0.266800       0.050200   -9999.000000
53759     53759     shanxi         110.8333       36.9833           92       163     2012      12        19        354              0.068208      -1.160431       0.000000       0.190734   -9999.000000       0.060500       0.051000   -9999.000000
53759     53759     shanxi         110.8333       36.9833           92       163     2012      12        20        355              0.000000      -0.997986       0.206940       0.188478   -9999.000000       0.027700       0.051500   -9999.000000
53759     53759     shanxi         110.8333       36.9833           92       163     2012      12        21        356              0.066792      -1.679138       0.115838       0.182494   -9999.000000       0.077800       0.048400   -9999.000000
53759     53759     shanxi         110.8333       36.9833           92       163     2012      12        22        357              0.062625      -4.397675       0.374652       0.157939   -9999.000000       0.065300       0.049100   -9999.000000
53759     53759     shanxi         110.8333       36.9833           92       163     2012      12        23        358              0.060083      -7.181213       0.000000       0.144317   -9999.000000   -9999.000000   -9999.000000   -9999.000000
53759     53759     shanxi         110.8333       36.9833           92       163     2012      12        24        359              0.060474      -7.824371       0.000000       0.138785       0.066000       0.046700       0.045100   -9999.000000
53759     53759     shanxi         110.8333       36.9833           92       163     2012      12        25        360              0.060625      -5.898926       0.000000       0.143953   -9999.000000       0.026400       0.052700   -9999.000000
53759     53759     shanxi         110.8333       36.9833           92       163     2012      12        26        361              0.000000      -5.136963       0.000000       0.148791   -9999.000000       0.097700       0.047400   -9999.000000
53759     53759     shanxi         110.8333       36.9833           92       163     2012      12        27        362              0.062667      -3.831909       0.000000       0.159890   -9999.000000       0.027100       0.050800   -9999.000000
53759     53759     shanxi         110.8333       36.9833           92       163     2012      12        28        363              0.061000      -2.681702       0.037834       0.171130   -9999.000000   -9999.000000       0.050100   -9999.000000
53759     53759     shanxi         110.8333       36.9833           92       163     2012      12        29        364              0.000000      -4.518921       0.000000       0.157103   -9999.000000       0.131500       0.049400   -9999.000000
53759     53759     shanxi         110.8333       36.9833           92       163     2012      12        30        365              0.000000      -7.541107       0.000000       0.141101       0.064000       0.007400       0.044300   -9999.000000
53759     53759     shanxi         110.8333       36.9833           92       163     2012      12        31        366              0.059667      -6.121124       0.000000       0.145838   -9999.000000       0.102400       0.047800   -9999.000000
