# Supplementary material for: Research on Fusing Multisatellite Soil Moisture Data Based on Bayesian Model Averaging
Source: Hindawi journal article supplement (doi:10.1155/2018/9310838), 2018-06-25
Supplement: f1 [file 9310838.f1.zip › 2012_sm00-10cm_daily_ZDB_ZHY_53763_366days_allin.txt]

53763     53763     shanxi         112.1828       37.7939           89       169     2012      01        01        001              0.000000   -9999.000000       0.000000   -9999.000000   -9999.000000   -9999.000000       0.037000   -9999.000000
53763     53763     shanxi         112.1828       37.7939           89       169     2012      01        02        002              0.044667      -3.716492       0.000000       0.156970   -9999.000000   -9999.000000       0.040100       0.145000
53763     53763     shanxi         112.1828       37.7939           89       169     2012      01        03        003              0.000000      -5.930908       0.000000       0.146157   -9999.000000   -9999.000000   -9999.000000       0.071000
53763     53763     shanxi         112.1828       37.7939           89       169     2012      01        04        004              0.037917      -8.807892       0.000000       0.129950   -9999.000000   -9999.000000       0.031100   -9999.000000
53763     53763     shanxi         112.1828       37.7939           89       169     2012      01        05        005              0.037708      -8.081421       0.000000       0.132466   -9999.000000   -9999.000000       0.034400       0.017000
53763     53763     shanxi         112.1828       37.7939           89       169     2012      01        06        006              0.037833      -6.976349       0.000000       0.139521   -9999.000000   -9999.000000       0.040100       0.031000
53763     53763     shanxi         112.1828       37.7939           89       169     2012      01        07        007              0.039542      -6.106506       0.000000       0.141274   -9999.000000       0.109000       0.042600       0.106000
53763     53763     shanxi         112.1828       37.7939           89       169     2012      01        08        008              0.000000      -4.981415       0.000000       0.144104   -9999.000000   -9999.000000       0.040800       0.082000
53763     53763     shanxi         112.1828       37.7939           89       169     2012      01        09        009              0.040875      -4.353973       0.000000       0.158661   -9999.000000   -9999.000000   -9999.000000       0.007000
53763     53763     shanxi         112.1828       37.7939           89       169     2012      01        10        010              0.039750      -4.123108       0.000000       0.158823   -9999.000000   -9999.000000       0.016800       0.069000
53763     53763     shanxi         112.1828       37.7939           89       169     2012      01        11        011              0.038625      -5.089661       0.000000       0.152941   -9999.000000   -9999.000000       0.036700       0.077000
53763     53763     shanxi         112.1828       37.7939           89       169     2012      01        12        012              0.038833      -5.997772       0.000000       0.146966   -9999.000000   -9999.000000       0.037300       0.011000
53763     53763     shanxi         112.1828       37.7939           89       169     2012      01        13        013              0.039542      -4.685791       0.000000       0.155684   -9999.000000   -9999.000000       0.038800   -9999.000000
53763     53763     shanxi         112.1828       37.7939           89       169     2012      01        14        014              0.040333      -4.203644       0.000000       0.157284   -9999.000000   -9999.000000   -9999.000000       0.059000
53763     53763     shanxi         112.1828       37.7939           89       169     2012      01        15        015              0.039583      -4.332947       0.000000       0.154887   -9999.000000   -9999.000000       0.038200       0.023000
53763     53763     shanxi         112.1828       37.7939           89       169     2012      01        16        016              0.038500      -4.193695       0.000000       0.157546   -9999.000000   -9999.000000       0.033700       0.066000
53763     53763     shanxi         112.1828       37.7939           89       169     2012      01        17        017              0.000000      -5.500122       0.000000       0.143940   -9999.000000       0.124100       0.032700       0.102000
53763     53763     shanxi         112.1828       37.7939           89       169     2012      01        18        018              0.040375      -3.927673       0.000000       0.156255   -9999.000000   -9999.000000       0.036600   -9999.000000
53763     53763     shanxi         112.1828       37.7939           89       169     2012      01        19        019              0.041625      -3.477936       0.000000       0.162953   -9999.000000   -9999.000000       0.036600       0.005000
53763     53763     shanxi         112.1828       37.7939           89       169     2012      01        20        020              0.042583      -2.114990       0.000000       0.170174   -9999.000000   -9999.000000   -9999.000000   -9999.000000
53763     53763     shanxi         112.1828       37.7939           89       169     2012      01        21        021              0.041208      -4.936554       0.000000       0.147088   -9999.000000   -9999.000000       0.025500       0.009000
53763     53763     shanxi         112.1828       37.7939           89       169     2012      01        22        022              0.038750      -8.104706       0.000000       0.136205   -9999.000000   -9999.000000       0.025300       0.015000
53763     53763     shanxi         112.1828       37.7939           89       169     2012      01        23        023              0.036500      -9.730774       0.000000       0.128190   -9999.000000   -9999.000000       0.034900   -9999.000000
53763     53763     shanxi         112.1828       37.7939           89       169     2012      01        24        024              0.035375      -9.729462       0.000000       0.126610   -9999.000000   -9999.000000   -9999.000000       0.042000
53763     53763     shanxi         112.1828       37.7939           89       169     2012      01        25        025              0.035750      -9.889679       0.000000       0.125920   -9999.000000   -9999.000000       0.036600       0.008000
53763     53763     shanxi         112.1828       37.7939           89       169     2012      01        26        026              0.037500      -7.258270       0.000000       0.139065   -9999.000000   -9999.000000       0.033700       0.093000
53763     53763     shanxi         112.1828       37.7939           89       169     2012      01        27        027              0.039083      -4.612122       0.000000       0.159016       0.109000   -9999.000000       0.028300       0.050000
53763     53763     shanxi         112.1828       37.7939           89       169     2012      01        28        028              0.040917      -2.951874       0.000000       0.167129       0.111000   -9999.000000       0.037400   -9999.000000
53763     53763     shanxi         112.1828       37.7939           89       169     2012      01        29        029              0.041792      -2.518768       0.000000       0.172755   -9999.000000   -9999.000000       0.037200       0.092000
53763     53763     shanxi         112.1828       37.7939           89       169     2012      01        30        030              0.041500      -2.878052       0.000000       0.170230   -9999.000000       0.077100       0.039300       0.004000
53763     53763     shanxi         112.1828       37.7939           89       169     2012      01        31        031              0.043375      -2.353943       0.000000       0.172337   -9999.000000   -9999.000000   -9999.000000       0.175000
53763     53763     shanxi         112.1828       37.7939           89       169     2012      02        01        032              0.040875      -0.607117       0.000000       0.186861   -9999.000000   -9999.000000       0.038300       0.003000
53763     53763     shanxi         112.1828       37.7939           89       169     2012      02        02        033              0.039125      -5.464783       0.000000       0.155686   -9999.000000   -9999.000000       0.038900   -9999.000000
53763     53763     shanxi         112.1828       37.7939           89       169     2012      02        03        034              0.040542      -5.735199       0.000000       0.149348       0.120000   -9999.000000       0.039200       0.007000
53763     53763     shanxi         112.1828       37.7939           89       169     2012      02        04        035              0.042125      -3.292358       0.000000       0.164803   -9999.000000   -9999.000000       0.039100       0.075000
53763     53763     shanxi         112.1828       37.7939           89       169     2012      02        05        036              0.045167      -2.666290       0.000000       0.167037   -9999.000000   -9999.000000       0.042200       0.127000
53763     53763     shanxi         112.1828       37.7939           89       169     2012      02        06        037              0.042500      -0.328552       0.000000       0.184805   -9999.000000   -9999.000000   -9999.000000       0.030000
53763     53763     shanxi         112.1828       37.7939           89       169     2012      02        07        038              0.038625      -6.517914       0.000000       0.148698   -9999.000000   -9999.000000       0.031400       0.048000
53763     53763     shanxi         112.1828       37.7939           89       169     2012      02        08        039              0.037708      -7.742889       0.000000       0.133530   -9999.000000   -9999.000000       0.040100       0.018000
53763     53763     shanxi         112.1828       37.7939           89       169     2012      02        09        040              0.038500      -6.997772       0.000000       0.136599   -9999.000000   -9999.000000       0.044200   -9999.000000
53763     53763     shanxi         112.1828       37.7939           89       169     2012      02        10        041              0.039417      -6.085083       0.000000       0.141971   -9999.000000   -9999.000000       0.043400       0.112000
53763     53763     shanxi         112.1828       37.7939           89       169     2012      02        11        042              0.042208      -4.709259       0.000000       0.157474   -9999.000000   -9999.000000       0.047500   -9999.000000
53763     53763     shanxi         112.1828       37.7939           89       169     2012      02        12        043              0.043500      -1.841278       0.000000       0.171160   -9999.000000   -9999.000000   -9999.000000       0.002000
53763     53763     shanxi         112.1828       37.7939           89       169     2012      02        13        044              0.045417      -2.475372       0.000000       0.169282   -9999.000000   -9999.000000   -9999.000000       0.052000
53763     53763     shanxi         112.1828       37.7939           89       169     2012      02        14        045              0.047292      -0.087006       0.000000       0.187218   -9999.000000   -9999.000000       0.044600       0.176000
53763     53763     shanxi         112.1828       37.7939           89       169     2012      02        15        046              0.047042      -0.120667       0.000000       0.187958   -9999.000000   -9999.000000       0.046400       0.112000
53763     53763     shanxi         112.1828       37.7939           89       169     2012      02        16        047              0.043958      -1.429626       0.000000       0.181173   -9999.000000   -9999.000000       0.046200   -9999.000000
53763     53763     shanxi         112.1828       37.7939           89       169     2012      02        17        048              0.041917      -3.935974       0.000000       0.161143   -9999.000000   -9999.000000   -9999.000000       0.079000
53763     53763     shanxi         112.1828       37.7939           89       169     2012      02        18        049              0.041375      -5.570343       0.974446       0.152398       0.090000   -9999.000000       0.041500       0.066000
53763     53763     shanxi         112.1828       37.7939           89       169     2012      02        19        050              0.042125      -4.756531       1.154670       0.160916       0.101000   -9999.000000       0.045200       0.253000
53763     53763     shanxi         112.1828       37.7939           89       169     2012      02        20        051              0.045875      -1.914032       0.000000       0.172216       0.110000   -9999.000000       0.043900       0.062000
53763     53763     shanxi         112.1828       37.7939           89       169     2012      02        21        052              0.050000       1.036255       0.000000       0.190903   -9999.000000       0.056300   -9999.000000   -9999.000000
53763     53763     shanxi         112.1828       37.7939           89       169     2012      02        22        053              0.056042       2.996490       0.000000       0.204557   -9999.000000   -9999.000000       0.057000       0.240000
53763     53763     shanxi         112.1828       37.7939           89       169     2012      02        23        054              0.060500       3.959137       0.000000       0.208304       0.093000   -9999.000000   -9999.000000       0.274000
53763     53763     shanxi         112.1828       37.7939           89       169     2012      02        24        055              0.064042       1.844208       0.000000       0.198273       0.103000   -9999.000000       0.038200       0.262000
53763     53763     shanxi         112.1828       37.7939           89       169     2012      02        25        056              0.059917       0.912903       0.000000       0.195562   -9999.000000   -9999.000000       0.045000       0.037000
53763     53763     shanxi         112.1828       37.7939           89       169     2012      02        26        057              0.057333      -1.058685       0.000000       0.178450   -9999.000000       0.026900       0.048700   -9999.000000
53763     53763     shanxi         112.1828       37.7939           89       169     2012      02        27        058              0.057333      -0.031372       2.652733       0.185117   -9999.000000   -9999.000000   -9999.000000       0.237000
53763     53763     shanxi         112.1828       37.7939           89       169     2012      02        28        059              0.061708       1.716583       0.000000       0.194897       0.088000       0.045300       0.049300       0.244000
53763     53763     shanxi         112.1828       37.7939           89       169     2012      02        29        060              0.000000   -9999.000000       0.000000   -9999.000000       0.103000   -9999.000000   -9999.000000   -9999.000000
53763     53763     shanxi         112.1828       37.7939           89       169     2012      03        01        061              0.072250       2.585388       0.000000       0.202827   -9999.000000   -9999.000000       0.036100       0.182000
53763     53763     shanxi         112.1828       37.7939           89       169     2012      03        02        062              0.076125       1.705688       0.000000       0.205899   -9999.000000   -9999.000000       0.043100   -9999.000000
53763     53763     shanxi         112.1828       37.7939           89       169     2012      03        03        063              0.080083       2.208466       0.000000       0.209179   -9999.000000   -9999.000000       0.048300       0.085000
53763     53763     shanxi         112.1828       37.7939           89       169     2012      03        04        064              0.080292       0.370148       0.000000       0.192347   -9999.000000       0.101600       0.056600       0.179000
53763     53763     shanxi         112.1828       37.7939           89       169     2012      03        05        065              0.085250       1.520264       0.000000       0.200403       0.119000   -9999.000000   -9999.000000       0.254000
53763     53763     shanxi         112.1828       37.7939           89       169     2012      03        06        066              0.081375       1.151001       0.597584       0.194919       0.119000   -9999.000000       0.042900       0.070000
53763     53763     shanxi         112.1828       37.7939           89       169     2012      03        07        067              0.000000       0.801086       0.000000       0.189168       0.129000   -9999.000000       0.048500       0.279000
53763     53763     shanxi         112.1828       37.7939           89       169     2012      03        08        068              0.088500       3.155334       0.000000       0.199747   -9999.000000   -9999.000000       0.052700       0.183000
53763     53763     shanxi         112.1828       37.7939           89       169     2012      03        09        069              0.098958       2.131927       0.000000       0.201924   -9999.000000   -9999.000000       0.059400   -9999.000000
53763     53763     shanxi         112.1828       37.7939           89       169     2012      03        10        070              0.106458       2.767395       0.000000       0.203970       0.117000   -9999.000000       0.060800       0.177000
53763     53763     shanxi         112.1828       37.7939           89       169     2012      03        11        071              0.102750       2.662323       0.000000       0.196368       0.110000   -9999.000000   -9999.000000   -9999.000000
53763     53763     shanxi         112.1828       37.7939           89       169     2012      03        12        072              0.118250       3.041656       0.000000       0.194952       0.116000       0.087300       0.031200       0.347000
53763     53763     shanxi         112.1828       37.7939           89       169     2012      03        13        073              0.134917       4.078827       0.000000       0.200557   -9999.000000   -9999.000000       0.052300       0.211000
53763     53763     shanxi         112.1828       37.7939           89       169     2012      03        14        074              0.153304       5.763428       0.000000       0.202739   -9999.000000   -9999.000000   -9999.000000       0.417000
53763     53763     shanxi         112.1828       37.7939           89       169     2012      03        15        075              0.142875       6.212555       0.000000       0.202911   -9999.000000   -9999.000000       0.071500       0.376000
53763     53763     shanxi         112.1828       37.7939           89       169     2012      03        16        076              0.166250       3.557953       0.000000       0.207410       0.112000   -9999.000000   -9999.000000   -9999.000000
53763     53763     shanxi         112.1828       37.7939           89       169     2012      03        17        077              0.169708       7.940369       0.000000       0.211967       0.112000       0.068200       0.053700       0.420000
53763     53763     shanxi         112.1828       37.7939           89       169     2012      03        18        078              0.166500       9.592285       8.242694       0.209780   -9999.000000   -9999.000000       0.050600       0.483000
53763     53763     shanxi         112.1828       37.7939           89       169     2012      03        19        079              0.161042       6.140076       0.000000       0.205324   -9999.000000   -9999.000000       0.060000       0.428000
53763     53763     shanxi         112.1828       37.7939           89       169     2012      03        20        080              0.161042       2.729492       0.000000       0.202384       0.104000   -9999.000000       0.067800       0.405000
53763     53763     shanxi         112.1828       37.7939           89       169     2012      03        21        081              0.157333       6.863312       0.705831       0.209440   -9999.000000   -9999.000000       0.071100   -9999.000000
53763     53763     shanxi         112.1828       37.7939           89       169     2012      03        22        082              0.160667       3.441772       0.453357       0.210047       0.123000   -9999.000000   -9999.000000       0.789000
53763     53763     shanxi         112.1828       37.7939           89       169     2012      03        23        083              0.160042       4.430389       0.400211       0.223782       0.104000   -9999.000000       0.046200       0.318000
53763     53763     shanxi         112.1828       37.7939           89       169     2012      03        24        084              0.155542       4.245331       0.000000       0.211479   -9999.000000   -9999.000000   -9999.000000       0.542000
53763     53763     shanxi         112.1828       37.7939           89       169     2012      03        25        085              0.000000       7.774475       0.000000       0.209658       0.098000       0.033000       0.062000       0.407000
53763     53763     shanxi         112.1828       37.7939           89       169     2012      03        26        086              0.156458       9.482574       0.000000       0.205246       0.096000   -9999.000000       0.065400   -9999.000000
53763     53763     shanxi         112.1828       37.7939           89       169     2012      03        27        087              0.157083      10.803986       0.000000       0.198059       0.104000   -9999.000000       0.073700       0.484000
53763     53763     shanxi         112.1828       37.7939           89       169     2012      03        28        088              0.156500      11.848328       0.024300       0.190753       0.118000       0.134800       0.070100       0.583000
53763     53763     shanxi         112.1828       37.7939           89       169     2012      03        29        089              0.158292      12.679962       0.075990       0.188220   -9999.000000   -9999.000000       0.035500       0.521000
53763     53763     shanxi         112.1828       37.7939           89       169     2012      03        30        090              0.154958      12.708008       0.680423       0.185246   -9999.000000   -9999.000000       0.062200       0.368000
53763     53763     shanxi         112.1828       37.7939           89       169     2012      03        31        091              0.156000       7.624268       0.000000       0.186745       0.095000   -9999.000000       0.059300   -9999.000000
53763     53763     shanxi         112.1828       37.7939           89       169     2012      04        01        092              0.155250      11.776611       0.000000       0.188255       0.113000   -9999.000000       0.069600       0.507000
53763     53763     shanxi         112.1828       37.7939           89       169     2012      04        02        093              0.151042      12.654938       0.092685       0.182304       0.114000       0.117000   -9999.000000       0.414000
53763     53763     shanxi         112.1828       37.7939           89       169     2012      04        03        094              0.150667       7.056366       0.000000       0.181060   -9999.000000   -9999.000000       0.060300       0.406000
53763     53763     shanxi         112.1828       37.7939           89       169     2012      04        04        095              0.151792      10.322052       0.668827       0.180036   -9999.000000   -9999.000000       0.052900       0.396000
53763     53763     shanxi         112.1828       37.7939           89       169     2012      04        05        096              0.150917      12.957703       0.000000       0.175892       0.098000   -9999.000000       0.064400       0.476000
53763     53763     shanxi         112.1828       37.7939           89       169     2012      04        06        097              0.150667      12.920959       0.000000       0.172764       0.104000   -9999.000000       0.059100       0.420000
53763     53763     shanxi         112.1828       37.7939           89       169     2012      04        07        098              0.150833      13.444183       0.000000       0.170443       0.107000   -9999.000000       0.066500       0.513000
53763     53763     shanxi         112.1828       37.7939           89       169     2012      04        08        099              0.151042      15.322083       0.000000       0.167981       0.108000   -9999.000000   -9999.000000       0.442000
53763     53763     shanxi         112.1828       37.7939           89       169     2012      04        09        100              0.150083      16.883545       0.000000       0.166113       0.114000       0.087600       0.048800   -9999.000000
53763     53763     shanxi         112.1828       37.7939           89       169     2012      04        10        101              0.149083      17.768280       0.316807       0.165937       0.118500   -9999.000000       0.068300       0.322000
53763     53763     shanxi         112.1828       37.7939           89       169     2012      04        11        102              0.155083      15.055786       1.912334       0.171849       0.100000   -9999.000000       0.063300       0.800000
53763     53763     shanxi         112.1828       37.7939           89       169     2012      04        12        103              0.161875      11.882019       0.605231       0.184396       0.129000   -9999.000000       0.082100       0.674000
53763     53763     shanxi         112.1828       37.7939           89       169     2012      04        13        104              0.155333      11.618011       0.093109       0.190532       0.106000   -9999.000000       0.070600       0.444000
53763     53763     shanxi         112.1828       37.7939           89       169     2012      04        14        105              0.153167      15.203705       0.303909       0.180546       0.117000   -9999.000000       0.066300   -9999.000000
53763     53763     shanxi         112.1828       37.7939           89       169     2012      04        15        106              0.152458      16.298767       0.000000       0.173451       0.101000       0.132700       0.038500       0.389000
53763     53763     shanxi         112.1828       37.7939           89       169     2012      04        16        107              0.151667      17.798340       0.319650       0.167859       0.096000   -9999.000000       0.071500       0.371000
53763     53763     shanxi         112.1828       37.7939           89       169     2012      04        17        108              0.150458      17.196686       0.000000       0.164709       0.099000       0.134000       0.066700       0.530000
53763     53763     shanxi         112.1828       37.7939           89       169     2012      04        18        109              0.150167      18.810974       3.413914       0.163826       0.110000   -9999.000000   -9999.000000       0.520000
53763     53763     shanxi         112.1828       37.7939           89       169     2012      04        19        110              0.149750      17.749542       0.108788       0.194798       0.104000   -9999.000000   -9999.000000   -9999.000000
53763     53763     shanxi         112.1828       37.7939           89       169     2012      04        20        111              0.149375      16.119049       1.444934       0.198016       0.116000       0.027300       0.070900       0.447000
53763     53763     shanxi         112.1828       37.7939           89       169     2012      04        21        112              0.150417      16.241760       0.000000       0.193613       0.095000   -9999.000000       0.059200       0.479000
53763     53763     shanxi         112.1828       37.7939           89       169     2012      04        22        113              0.150167      17.820526       2.784009       0.190372       0.083000       0.020300       0.070800       0.540000
53763     53763     shanxi         112.1828       37.7939           89       169     2012      04        23        114              0.152375      19.311615       5.231640       0.205987       0.099000   -9999.000000       0.064600       0.427000
53763     53763     shanxi         112.1828       37.7939           89       169     2012      04        24        115              0.159792      23.023529       2.255078       0.202216       0.165000       0.340300       0.099700   -9999.000000
53763     53763     shanxi         112.1828       37.7939           89       169     2012      04        25        116              0.000000      12.468750       0.000000       0.255390   -9999.000000       0.279300   -9999.000000       0.537000
53763     53763     shanxi         112.1828       37.7939           89       169     2012      04        26        117              0.154875      12.514008       0.133057       0.224929       0.103000   -9999.000000       0.056400       0.473000
53763     53763     shanxi         112.1828       37.7939           89       169     2012      04        27        118              0.154500      17.855988       0.000000       0.204260       0.100500   -9999.000000   -9999.000000       0.461000
53763     53763     shanxi         112.1828       37.7939           89       169     2012      04        28        119              0.153292      18.580109       2.015918       0.188173       0.094000   -9999.000000       0.063600       0.370000
53763     53763     shanxi         112.1828       37.7939           89       169     2012      04        29        120              0.153167      19.885101       0.000000       0.177507       0.106000   -9999.000000       0.070800   -9999.000000
53763     53763     shanxi         112.1828       37.7939           89       169     2012      04        30        121              0.153167      21.913544       0.000000       0.170594       0.102000       0.034100   -9999.000000       0.320000
53763     53763     shanxi         112.1828       37.7939           89       169     2012      05        01        122              0.151083      23.503967       0.989404       0.167389       0.113000   -9999.000000       0.083700       0.434000
53763     53763     shanxi         112.1828       37.7939           89       169     2012      05        02        123              0.151583      20.082794       0.000000       0.176836       0.119000   -9999.000000       0.061100       0.395000
53763     53763     shanxi         112.1828       37.7939           89       169     2012      05        03        124              0.150542      22.522278       0.000000       0.173253       0.106000   -9999.000000       0.077300       0.346000
53763     53763     shanxi         112.1828       37.7939           89       169     2012      05        04        125              0.149750      23.253937       0.000000       0.165134       0.102000   -9999.000000       0.069100       0.353000
53763     53763     shanxi         112.1828       37.7939           89       169     2012      05        05        126              0.148958      24.195312       0.000000       0.161628       0.112000   -9999.000000       0.074500       0.290000
53763     53763     shanxi         112.1828       37.7939           89       169     2012      05        06        127              0.147750      24.331604       0.000000       0.159833       0.106000   -9999.000000   -9999.000000   -9999.000000
53763     53763     shanxi         112.1828       37.7939           89       169     2012      05        07        128              0.146542      26.177032       0.000000       0.158812   -9999.000000       0.087900       0.069300       0.346000
53763     53763     shanxi         112.1828       37.7939           89       169     2012      05        08        129              0.145833      25.282684       0.584010       0.159269       0.093000       0.030200       0.065200   -9999.000000
53763     53763     shanxi         112.1828       37.7939           89       169     2012      05        09        130              0.141542      26.122650       1.654867       0.164053       0.115000       0.389700       0.082200       0.606000
53763     53763     shanxi         112.1828       37.7939           89       169     2012      05        10        131              0.142667      21.285217       0.176187       0.187966       0.119000   -9999.000000       0.070700       0.249000
53763     53763     shanxi         112.1828       37.7939           89       169     2012      05        11        132              0.136125      25.221924       2.154359       0.171645       0.199000   -9999.000000       0.089700       0.531000
53763     53763     shanxi         112.1828       37.7939           89       169     2012      05        12        133              0.134208      18.081909       0.478579       0.199609       0.135500       0.220700   -9999.000000       0.321000
53763     53763     shanxi         112.1828       37.7939           89       169     2012      05        13        134              0.132292      16.212158       0.000000       0.185679       0.127000       0.089800       0.050500   -9999.000000
53763     53763     shanxi         112.1828       37.7939           89       169     2012      05        14        135              0.132917      16.708160       0.000000       0.173821       0.126000   -9999.000000       0.097100       0.260000
53763     53763     shanxi         112.1828       37.7939           89       169     2012      05        15        136              0.132583      17.487915       0.000000       0.165466       0.150000       0.030300       0.084600       0.287000
53763     53763     shanxi         112.1828       37.7939           89       169     2012      05        16        137              0.132125      19.349854       0.000000       0.160970       0.140000   -9999.000000       0.094600       0.392000
53763     53763     shanxi         112.1828       37.7939           89       169     2012      05        17        138              0.132917      20.207794       0.000000       0.158649       0.127000       0.231100       0.091100       0.340000
53763     53763     shanxi         112.1828       37.7939           89       169     2012      05        18        139              0.132708      23.481689       0.000000       0.156798       0.131000       0.027100       0.097500   -9999.000000
53763     53763     shanxi         112.1828       37.7939           89       169     2012      05        19        140              0.131708      25.585815       0.737808       0.156239       0.114000   -9999.000000       0.067700       0.328000
53763     53763     shanxi         112.1828       37.7939           89       169     2012      05        20        141              0.129667      25.472198       0.000000       0.163154   -9999.000000       0.077300       0.092700       0.269000
53763     53763     shanxi         112.1828       37.7939           89       169     2012      05        21        142              0.122375      24.779205       2.463144       0.160584       0.233000   -9999.000000       0.104400       0.413000
53763     53763     shanxi         112.1828       37.7939           89       169     2012      05        22        143              0.123667      16.767822       0.000000       0.186728       0.165000   -9999.000000       0.102800       0.264000
53763     53763     shanxi         112.1828       37.7939           89       169     2012      05        23        144              0.123333      19.764099       0.000000       0.182084   -9999.000000       0.091300   -9999.000000   -9999.000000
53763     53763     shanxi         112.1828       37.7939           89       169     2012      05        24        145              0.122000      20.341919       0.000000       0.166451       0.163000   -9999.000000       0.096500       0.402000
53763     53763     shanxi         112.1828       37.7939           89       169     2012      05        25        146              0.000000      21.645630       0.258984       0.159479       0.128000   -9999.000000       0.105700       0.317000
53763     53763     shanxi         112.1828       37.7939           89       169     2012      05        26        147              0.116125      21.552002       3.823614       0.158231       0.167000       0.049500       0.091900       0.310000
53763     53763     shanxi         112.1828       37.7939           89       169     2012      05        27        148              0.112125      23.778900       0.000000       0.155949       0.184000   -9999.000000       0.094000       0.248000
53763     53763     shanxi         112.1828       37.7939           89       169     2012      05        28        149              0.107000      25.664307      11.735738       0.153959       0.163000       0.050800       0.100300   -9999.000000
53763     53763     shanxi         112.1828       37.7939           89       169     2012      05        29        150              0.106042      25.420837       0.218612       0.179570       0.194000   -9999.000000   -9999.000000       0.320000
53763     53763     shanxi         112.1828       37.7939           89       169     2012      05        30        151              0.106708      20.337708       0.000000       0.249534       0.157000       0.158900       0.090700   -9999.000000
53763     53763     shanxi         112.1828       37.7939           89       169     2012      05        31        152              0.107875      21.259735      16.805441       0.209480       0.267000   -9999.000000   -9999.000000   -9999.000000
53763     53763     shanxi         112.1828       37.7939           89       169     2012      06        01        153              0.129333      19.357971       0.570689       0.277020       0.235000   -9999.000000       0.116800       0.558000
53763     53763     shanxi         112.1828       37.7939           89       169     2012      06        02        154              0.127000      19.729370       2.691399       0.275180       0.221000       0.204800       0.111600       0.598000
53763     53763     shanxi         112.1828       37.7939           89       169     2012      06        03        155              0.162083      20.666443      24.531689       0.250843   -9999.000000   -9999.000000       0.136100       0.763000
53763     53763     shanxi         112.1828       37.7939           89       169     2012      06        04        156              0.174458      17.700195       0.000000       0.364995       0.160000       0.190600       0.165100   -9999.000000
53763     53763     shanxi         112.1828       37.7939           89       169     2012      06        05        157              0.155625      21.222900       0.375405       0.288963   -9999.000000       0.174400       0.133700       0.394000
53763     53763     shanxi         112.1828       37.7939           89       169     2012      06        06        158              0.146167      22.337128       2.296001       0.269867       0.213000   -9999.000000       0.162800   -9999.000000
53763     53763     shanxi         112.1828       37.7939           89       169     2012      06        07        159              0.147750      19.273865       0.526096       0.275640       0.199000   -9999.000000       0.150200       0.330000
53763     53763     shanxi         112.1828       37.7939           89       169     2012      06        08        160              0.150125      19.772400       1.757340       0.261881       0.192000       0.167900       0.151800       0.315000
53763     53763     shanxi         112.1828       37.7939           89       169     2012      06        09        161              0.150250      21.665192       0.303640       0.248630       0.141000   -9999.000000   -9999.000000       0.503000
53763     53763     shanxi         112.1828       37.7939           89       169     2012      06        10        162              0.146500      23.951080       0.000000       0.230649       0.174000       0.035600       0.137200       0.339000
53763     53763     shanxi         112.1828       37.7939           89       169     2012      06        11        163              0.000000      21.402100       0.000000       0.216054       0.204000   -9999.000000       0.167800   -9999.000000
53763     53763     shanxi         112.1828       37.7939           89       169     2012      06        12        164              0.142167      22.488831       0.000000       0.200499       0.184500   -9999.000000       0.154000       0.308000
53763     53763     shanxi         112.1828       37.7939           89       169     2012      06        13        165              0.139167      24.745300       0.000000       0.188300       0.188000       0.095100       0.155800       0.367000
53763     53763     shanxi         112.1828       37.7939           89       169     2012      06        14        166              0.136250      25.367676       0.000000       0.180379       0.188000   -9999.000000       0.157200       0.441000
53763     53763     shanxi         112.1828       37.7939           89       169     2012      06        15        167              0.134792      22.958862       0.000000       0.176932       0.190000   -9999.000000   -9999.000000       0.358000
53763     53763     shanxi         112.1828       37.7939           89       169     2012      06        16        168              0.134875      23.580566       0.000000       0.174526       0.197000   -9999.000000       0.127200   -9999.000000
53763     53763     shanxi         112.1828       37.7939           89       169     2012      06        17        169              0.133750      26.228363       0.000000       0.170467       0.202000       0.151100       0.166400       0.328000
53763     53763     shanxi         112.1828       37.7939           89       169     2012      06        18        170              0.133125      28.180054       0.000000       0.167235       0.186500       0.130100       0.156400       0.313000
53763     53763     shanxi         112.1828       37.7939           89       169     2012      06        19        171              0.130958      29.202362       0.976259       0.165448   -9999.000000   -9999.000000       0.167400       0.419000
53763     53763     shanxi         112.1828       37.7939           89       169     2012      06        20        172              0.128000      26.156555       1.475056       0.174431       0.190000       0.026500   -9999.000000       0.278000
53763     53763     shanxi         112.1828       37.7939           89       169     2012      06        21        173              0.125667      25.056000       6.629764       0.171343       0.242000   -9999.000000       0.184400   -9999.000000
53763     53763     shanxi         112.1828       37.7939           89       169     2012      06        22        174              0.127625      25.342468       5.557252       0.221170   -9999.000000   -9999.000000       0.184800       0.576000
53763     53763     shanxi         112.1828       37.7939           89       169     2012      06        23        175              0.129375      26.190887       6.997121       0.249137       0.256000       0.078700       0.203500       0.396000
53763     53763     shanxi         112.1828       37.7939           89       169     2012      06        24        176              0.128917      24.999664       1.366029       0.263407       0.259000   -9999.000000       0.191300       0.644000
53763     53763     shanxi         112.1828       37.7939           89       169     2012      06        25        177              0.129750      22.443939       0.206832       0.266989       0.217000   -9999.000000       0.183400       0.425000
53763     53763     shanxi         112.1828       37.7939           89       169     2012      06        26        178              0.128833      23.888336       0.057607       0.247216       0.251000       0.217000   -9999.000000   -9999.000000
53763     53763     shanxi         112.1828       37.7939           89       169     2012      06        27        179              0.124625      23.505676       8.904868       0.233590   -9999.000000   -9999.000000       0.174800       0.572000
53763     53763     shanxi         112.1828       37.7939           89       169     2012      06        28        180              0.200083      20.552551      45.943329       0.261247       0.298000       0.128300       0.185000       0.959000
53763     53763     shanxi         112.1828       37.7939           89       169     2012      06        29        181              0.243042      19.452026       5.472750       0.343311       0.292000   -9999.000000       0.211500       1.000000
53763     53763     shanxi         112.1828       37.7939           89       169     2012      06        30        182              0.217208      21.812775       0.000000       0.336250       0.216000   -9999.000000       0.190700   -9999.000000
53763     53763     shanxi         112.1828       37.7939           89       169     2012      07        01        183              0.203917      24.608856       0.000000       0.304800       0.202000       0.210600       0.175400       0.730000
53763     53763     shanxi         112.1828       37.7939           89       169     2012      07        02        184              0.195917      26.335358       2.222102       0.289022       0.243000   -9999.000000       0.181900       0.577000
53763     53763     shanxi         112.1828       37.7939           89       169     2012      07        03        185              0.189542      25.553040       2.213709       0.286877       0.228000       0.191900       0.132300       0.618000
53763     53763     shanxi         112.1828       37.7939           89       169     2012      07        04        186              0.183167      24.418915       0.000000       0.286583       0.210500   -9999.000000       0.184600       0.362000
53763     53763     shanxi         112.1828       37.7939           89       169     2012      07        05        187              0.181333      24.220581       0.000000       0.278016       0.182000       0.179000       0.158900   -9999.000000
53763     53763     shanxi         112.1828       37.7939           89       169     2012      07        06        188              0.177875      26.292999       0.077031       0.263937   -9999.000000   -9999.000000       0.170900       0.328000
53763     53763     shanxi         112.1828       37.7939           89       169     2012      07        07        189              0.172708      27.086365       0.126199       0.252221   -9999.000000   -9999.000000   -9999.000000       0.364000
53763     53763     shanxi         112.1828       37.7939           89       169     2012      07        08        190              0.227167      25.076904      27.043152       0.248024       0.328000   -9999.000000       0.202300       0.546000
53763     53763     shanxi         112.1828       37.7939           89       169     2012      07        09        191              0.259250      23.913055      20.290564       0.317126       0.307000   -9999.000000       0.191600       1.000000
53763     53763     shanxi         112.1828       37.7939           89       169     2012      07        10        192              0.236583      22.178375       0.132186       0.347195       0.226000       0.100800       0.202800   -9999.000000
53763     53763     shanxi         112.1828       37.7939           89       169     2012      07        11        193              0.215708      24.938263       0.000000       0.315437       0.204000       0.309500       0.181900       0.818000
53763     53763     shanxi         112.1828       37.7939           89       169     2012      07        12        194              0.203500      25.900146       0.000000       0.298453       0.229000   -9999.000000       0.175800       0.564000
53763     53763     shanxi         112.1828       37.7939           89       169     2012      07        13        195              0.194667      26.054626       3.249458       0.285663       0.256000   -9999.000000   -9999.000000       0.605000
53763     53763     shanxi         112.1828       37.7939           89       169     2012      07        14        196              0.189042      23.278076       1.139990       0.282092       0.220000   -9999.000000       0.172900       0.563000
53763     53763     shanxi         112.1828       37.7939           89       169     2012      07        15        197              0.185750      22.784973       1.155214       0.281865       0.236000   -9999.000000       0.187500   -9999.000000
53763     53763     shanxi         112.1828       37.7939           89       169     2012      07        16        198              0.181167      23.176727       0.000000       0.278193       0.193000       0.129100       0.187100       0.589000
53763     53763     shanxi         112.1828       37.7939           89       169     2012      07        17        199              0.170375      23.962799       0.000000       0.267384       0.204000   -9999.000000       0.196200       0.388000
53763     53763     shanxi         112.1828       37.7939           89       169     2012      07        18        200              0.161083      23.999146       0.000000       0.257035       0.209000   -9999.000000       0.192200       0.527000
53763     53763     shanxi         112.1828       37.7939           89       169     2012      07        19        201              0.156458      24.188446       0.000000       0.250374       0.225000       0.134300       0.195400       0.395000
53763     53763     shanxi         112.1828       37.7939           89       169     2012      07        20        202              0.153565      24.927917      13.158644       0.243300       0.144000   -9999.000000       0.184500   -9999.000000
53763     53763     shanxi         112.1828       37.7939           89       169     2012      07        21        203              0.218652      26.291931      17.659145       0.271926   -9999.000000       0.103500       0.220800       1.000000
53763     53763     shanxi         112.1828       37.7939           89       169     2012      07        22        204              0.212250      22.410431       0.000000       0.334995       0.254000   -9999.000000       0.200900       0.540000
53763     53763     shanxi         112.1828       37.7939           89       169     2012      07        23        205              0.196125      23.469574       0.185024       0.301539       0.268000   -9999.000000       0.182800       0.682000
53763     53763     shanxi         112.1828       37.7939           89       169     2012      07        24        206              0.188500      23.153412       1.168797       0.290728       0.304000       0.232300   -9999.000000       0.615000
53763     53763     shanxi         112.1828       37.7939           89       169     2012      07        25        207              0.185583      22.735199       0.000000       0.291158       0.252500   -9999.000000       0.181700   -9999.000000
53763     53763     shanxi         112.1828       37.7939           89       169     2012      07        26        208              0.194208      25.589539      22.526896       0.283978       0.271000       0.250700       0.181800       0.925000
53763     53763     shanxi         112.1828       37.7939           89       169     2012      07        27        209              0.205792      25.235291       0.728088       0.328020       0.267000   -9999.000000       0.187900       0.707000
53763     53763     shanxi         112.1828       37.7939           89       169     2012      07        28        210              0.196833      25.096222       1.220451       0.317336       0.243000   -9999.000000       0.191900       0.671000
53763     53763     shanxi         112.1828       37.7939           89       169     2012      07        29        211              0.190833      26.982971       0.000000       0.305345       0.255000   -9999.000000       0.185300       0.634000
53763     53763     shanxi         112.1828       37.7939           89       169     2012      07        30        212              0.204417      27.459625      47.913471       0.289253   -9999.000000   -9999.000000   -9999.000000       0.748000
53763     53763     shanxi         112.1828       37.7939           89       169     2012      07        31        213              0.248083      22.626343       3.089563       0.351108       0.294500   -9999.000000       0.183600       0.834000
53763     53763     shanxi         112.1828       37.7939           89       169     2012      08        01        214              0.228875      20.599762       0.154148       0.344288       0.266000   -9999.000000       0.207300       0.938000
53763     53763     shanxi         112.1828       37.7939           89       169     2012      08        02        215              0.215958      23.230377       0.694953       0.324545       0.263000   -9999.000000       0.194600       0.611000
53763     53763     shanxi         112.1828       37.7939           89       169     2012      08        03        216              0.204167      25.310822       0.000000       0.312846       0.272000       0.041800       0.207300   -9999.000000
53763     53763     shanxi         112.1828       37.7939           89       169     2012      08        04        217              0.194958      24.884949       0.000000       0.303633       0.276000   -9999.000000       0.197500       0.618000
53763     53763     shanxi         112.1828       37.7939           89       169     2012      08        05        218              0.188667      25.336700       2.067711       0.295908       0.254500   -9999.000000       0.205700       0.654000
53763     53763     shanxi         112.1828       37.7939           89       169     2012      08        06        219              0.188250      22.819336       0.000000       0.303427       0.240000   -9999.000000       0.105400       0.712000
53763     53763     shanxi         112.1828       37.7939           89       169     2012      08        07        220              0.182875      25.162170       0.000000       0.295992       0.230000   -9999.000000       0.105200       0.537000
53763     53763     shanxi         112.1828       37.7939           89       169     2012      08        08        221              0.177292      26.524384       3.823218       0.287420       0.296000       0.196900       0.123600   -9999.000000
53763     53763     shanxi         112.1828       37.7939           89       169     2012      08        09        222              0.171000      24.913574       0.000000       0.297659       0.278000   -9999.000000       0.126400       0.608000
53763     53763     shanxi         112.1828       37.7939           89       169     2012      08        10        223              0.164917      24.186462       0.000000       0.286410       0.224000   -9999.000000   -9999.000000       0.529000
53763     53763     shanxi         112.1828       37.7939           89       169     2012      08        11        224              0.160833      23.772919       0.354622       0.276056       0.242500       0.301100       0.125000       0.560000
53763     53763     shanxi         112.1828       37.7939           89       169     2012      08        12        225              0.158333      23.831146       0.141441       0.274213       0.241000   -9999.000000       0.127000       0.458000
53763     53763     shanxi         112.1828       37.7939           89       169     2012      08        13        226              0.155875      22.240540       0.396287       0.277786       0.233000       0.062700       0.161200   -9999.000000
53763     53763     shanxi         112.1828       37.7939           89       169     2012      08        14        227              0.157292      22.166260       8.517195       0.275146       0.288000   -9999.000000       0.187500       0.996000
53763     53763     shanxi         112.1828       37.7939           89       169     2012      08        15        228              0.162250      20.554657       0.000000       0.309053       0.277000       0.267200       0.178600       0.485000
53763     53763     shanxi         112.1828       37.7939           89       169     2012      08        16        229              0.159500      23.403778       0.415201       0.285665       0.216000       0.096000   -9999.000000       0.637000
53763     53763     shanxi         112.1828       37.7939           89       169     2012      08        17        230              0.183625      23.470825      20.717201       0.278767   -9999.000000   -9999.000000       0.150600       0.956000
53763     53763     shanxi         112.1828       37.7939           89       169     2012      08        18        231              0.212083      20.488800       4.333372       0.335708   -9999.000000   -9999.000000       0.189400   -9999.000000
53763     53763     shanxi         112.1828       37.7939           89       169     2012      08        19        232              0.202333      21.231323       0.000000       0.324061       0.259000   -9999.000000       0.171300       0.906000
53763     53763     shanxi         112.1828       37.7939           89       169     2012      08        20        233              0.190792      23.440338       0.486043       0.304054       0.266000       0.220000       0.206000       0.675000
53763     53763     shanxi         112.1828       37.7939           89       169     2012      08        21        234              0.180292      22.463226       0.000000       0.296992       0.240500       0.230700   -9999.000000       0.631000
53763     53763     shanxi         112.1828       37.7939           89       169     2012      08        22        235              0.170500      19.820679       0.000000       0.285881       0.256000   -9999.000000       0.187100   -9999.000000
53763     53763     shanxi         112.1828       37.7939           89       169     2012      08        23        236              0.164167      19.556610       0.000000       0.278424       0.227000   -9999.000000       0.173800   -9999.000000
53763     53763     shanxi         112.1828       37.7939           89       169     2012      08        24        237              0.158458      19.636414       0.000000       0.273105       0.224000   -9999.000000       0.200000       0.543000
53763     53763     shanxi         112.1828       37.7939           89       169     2012      08        25        238              0.000000      21.254120       0.000000       0.266930       0.273000       0.108200       0.176700       0.424000
53763     53763     shanxi         112.1828       37.7939           89       169     2012      08        26        239              0.149500      21.347778       0.000000       0.264031       0.246500       0.154900       0.192700       0.431000
53763     53763     shanxi         112.1828       37.7939           89       169     2012      08        27        240              0.146542      22.604004       1.403272       0.260024       0.230500   -9999.000000   -9999.000000       0.331000
53763     53763     shanxi         112.1828       37.7939           89       169     2012      08        28        241              0.143833      22.501038       2.104777       0.258633       0.218000       0.270900       0.134500       0.462000
53763     53763     shanxi         112.1828       37.7939           89       169     2012      08        29        242              0.140625      22.811218       0.000000       0.265902       0.243000       0.085800       0.150900       0.397000
53763     53763     shanxi         112.1828       37.7939           89       169     2012      08        30        243              0.136333      23.573273       0.000000       0.253375       0.249000   -9999.000000       0.136900       0.519000
53763     53763     shanxi         112.1828       37.7939           89       169     2012      08        31        244              0.133125      23.375916       4.520864       0.244008       0.252000       0.167000       0.141400       0.401000
53763     53763     shanxi         112.1828       37.7939           89       169     2012      09        01        245              0.194042      22.675446      37.491024       0.248186       0.333000   -9999.000000       0.173400   -9999.000000
53763     53763     shanxi         112.1828       37.7939           89       169     2012      09        02        246              0.208500      17.942474       0.000000       0.353026       0.292500       0.291100       0.165000       0.811000
53763     53763     shanxi         112.1828       37.7939           89       169     2012      09        03        247              0.191083      18.571564       0.000000       0.315716       0.268000   -9999.000000       0.134700       0.574000
53763     53763     shanxi         112.1828       37.7939           89       169     2012      09        04        248              0.178792      18.030457       8.777089       0.301390   -9999.000000   -9999.000000       0.178500       0.589000
53763     53763     shanxi         112.1828       37.7939           89       169     2012      09        05        249              0.205000      18.903534      10.907248       0.305069   -9999.000000   -9999.000000       0.177500       0.726000
53763     53763     shanxi         112.1828       37.7939           89       169     2012      09        06        250              0.257167      18.495209      20.650667       0.330019       0.361000   -9999.000000       0.189600   -9999.000000
53763     53763     shanxi         112.1828       37.7939           89       169     2012      09        07        251              0.231208      16.901917       0.420317       0.348682       0.285000       0.188300   -9999.000000       0.798000
53763     53763     shanxi         112.1828       37.7939           89       169     2012      09        08        252              0.215458      19.579468       0.000000       0.321750       0.269000       0.183100       0.167800       0.729000
53763     53763     shanxi         112.1828       37.7939           89       169     2012      09        09        253              0.203667      19.191681       0.000000       0.310457       0.284000   -9999.000000       0.148600       0.671000
53763     53763     shanxi         112.1828       37.7939           89       169     2012      09        10        254              0.195083      19.888824       0.660107       0.302232       0.283000   -9999.000000       0.108400       0.524000
53763     53763     shanxi         112.1828       37.7939           89       169     2012      09        11        255              0.189417      18.814087       0.000000       0.299020       0.274000       0.246800       0.097500   -9999.000000
53763     53763     shanxi         112.1828       37.7939           89       169     2012      09        12        256              0.180167      18.859772       0.000000       0.293735       0.254000   -9999.000000       0.104100       0.451000
53763     53763     shanxi         112.1828       37.7939           89       169     2012      09        13        257              0.173833      13.597076       0.250761       0.290475       0.236000       0.112600   -9999.000000       0.360000
53763     53763     shanxi         112.1828       37.7939           89       169     2012      09        14        258              0.170417      14.396759       0.000000       0.288788       0.226000   -9999.000000       0.081100       0.517000
53763     53763     shanxi         112.1828       37.7939           89       169     2012      09        15        259              0.166167      16.008148       0.000000       0.285143       0.268000       0.044400       0.104300       0.381000
53763     53763     shanxi         112.1828       37.7939           89       169     2012      09        16        260              0.163417      16.220856       0.000000       0.282421       0.265000       0.104000       0.096800   -9999.000000
53763     53763     shanxi         112.1828       37.7939           89       169     2012      09        17        261              0.159667      16.431091       0.000000       0.279088       0.234000   -9999.000000       0.115300       0.406000
53763     53763     shanxi         112.1828       37.7939           89       169     2012      09        18        262              0.155458      17.081573       2.534965       0.277095       0.254000       0.076700       0.117100       0.644000
53763     53763     shanxi         112.1828       37.7939           89       169     2012      09        19        263              0.156833      16.173737       1.707051       0.287544       0.238000   -9999.000000       0.118700       0.645000
53763     53763     shanxi         112.1828       37.7939           89       169     2012      09        20        264              0.160417      17.077057       3.965364       0.286586       0.235000   -9999.000000       0.096200       0.405000
53763     53763     shanxi         112.1828       37.7939           89       169     2012      09        21        265              0.160000      18.041290       1.586482       0.287071   -9999.000000       0.362300       0.126700   -9999.000000
53763     53763     shanxi         112.1828       37.7939           89       169     2012      09        22        266              0.159667      15.242828       0.000000       0.302257       0.250000   -9999.000000       0.114100       0.444000
53763     53763     shanxi         112.1828       37.7939           89       169     2012      09        23        267              0.156542      18.175201       0.000000       0.288667       0.221000   -9999.000000       0.119700       0.503000
53763     53763     shanxi         112.1828       37.7939           89       169     2012      09        24        268              0.153542      18.479004       1.634414       0.281583       0.220000   -9999.000000   -9999.000000       0.426000
53763     53763     shanxi         112.1828       37.7939           89       169     2012      09        25        269              0.159167      18.238831      18.771429       0.280875   -9999.000000       0.174700       0.151000       0.853000
53763     53763     shanxi         112.1828       37.7939           89       169     2012      09        26        270              0.171583      14.555450       0.000000       0.333893       0.264000       0.260900       0.145300       0.915000
53763     53763     shanxi         112.1828       37.7939           89       169     2012      09        27        271              0.166714      16.505524       0.000000       0.309461       0.265000   -9999.000000       0.156900       0.440000
53763     53763     shanxi         112.1828       37.7939           89       169     2012      09        28        272              0.158533      14.456970       0.000000       0.297871       0.239000   -9999.000000       0.143900   -9999.000000
53763     53763     shanxi         112.1828       37.7939           89       169     2012      09        29        273              0.153917      12.840271       0.113783       0.291169       0.253500   -9999.000000       0.151600       0.367000
53763     53763     shanxi         112.1828       37.7939           89       169     2012      09        30        274              0.151167      13.254852       0.120027       0.287132       0.241000   -9999.000000   -9999.000000   -9999.000000
53763     53763     shanxi         112.1828       37.7939           89       169     2012      10        01        275              0.148667      13.704895       0.683068       0.283034       0.191000   -9999.000000       0.087900       0.411000
53763     53763     shanxi         112.1828       37.7939           89       169     2012      10        02        276              0.148417      14.628662       0.166322       0.279175       0.198000   -9999.000000       0.110500       0.525000
53763     53763     shanxi         112.1828       37.7939           89       169     2012      10        03        277              0.149792      15.308685       0.147917       0.278191       0.173500   -9999.000000       0.099400       0.561000
53763     53763     shanxi         112.1828       37.7939           89       169     2012      10        04        278              0.147417      16.179779       1.032409       0.274185       0.203000       0.098600       0.125100       0.562000
53763     53763     shanxi         112.1828       37.7939           89       169     2012      10        05        279              0.145750      12.124390       0.000000       0.279628       0.179000       0.346600       0.114500   -9999.000000
53763     53763     shanxi         112.1828       37.7939           89       169     2012      10        06        280              0.144667      12.649597       0.000000       0.275114       0.200000       0.163100       0.115600       0.405000
53763     53763     shanxi         112.1828       37.7939           89       169     2012      10        07        281              0.143375      14.047638       0.000000       0.271547       0.196000   -9999.000000       0.087400       0.451000
53763     53763     shanxi         112.1828       37.7939           89       169     2012      10        08        282              0.142250      13.625641       1.765485       0.271392       0.203000       0.336800       0.110100       0.492000
53763     53763     shanxi         112.1828       37.7939           89       169     2012      10        09        283              0.140208      14.854370       0.093685       0.275930       0.187500   -9999.000000       0.100000       0.340000
53763     53763     shanxi         112.1828       37.7939           89       169     2012      10        10        284              0.137833      11.806763       0.000000       0.271052       0.185000   -9999.000000       0.109600   -9999.000000
53763     53763     shanxi         112.1828       37.7939           89       169     2012      10        11        285              0.136625      12.451050       0.513892       0.266693       0.139000       0.097600   -9999.000000       0.436000
53763     53763     shanxi         112.1828       37.7939           89       169     2012      10        12        286              0.135917      13.782074       0.000000       0.265510       0.142000   -9999.000000       0.093000       0.527000
53763     53763     shanxi         112.1828       37.7939           89       169     2012      10        13        287              0.135208      14.071716       0.000000       0.262797       0.143000       0.191800       0.106600       0.504000
53763     53763     shanxi         112.1828       37.7939           89       169     2012      10        14        288              0.134750      13.475647       0.443833       0.259108       0.137000   -9999.000000       0.096200       0.371000
53763     53763     shanxi         112.1828       37.7939           89       169     2012      10        15        289              0.133000      13.364655       2.048068       0.259145       0.159000   -9999.000000       0.107600   -9999.000000
53763     53763     shanxi         112.1828       37.7939           89       169     2012      10        16        290              0.131208       9.902161       2.986102       0.275988       0.164000   -9999.000000       0.111600       0.613000
53763     53763     shanxi         112.1828       37.7939           89       169     2012      10        17        291              0.129833       7.573029       0.000000       0.268500       0.154000   -9999.000000   -9999.000000       0.348000
53763     53763     shanxi         112.1828       37.7939           89       169     2012      10        18        292              0.128833       7.593689       0.000000       0.281448   -9999.000000       0.184300       0.081300       0.457000
53763     53763     shanxi         112.1828       37.7939           89       169     2012      10        19        293              0.130125       8.781433       0.000000       0.271806       0.147500       0.084800       0.110200       0.320000
53763     53763     shanxi         112.1828       37.7939           89       169     2012      10        20        294              0.130667      10.617096       0.697421       0.267361       0.138000   -9999.000000       0.099300   -9999.000000
53763     53763     shanxi         112.1828       37.7939           89       169     2012      10        21        295              0.127458      12.310242       2.419003       0.266267       0.187000   -9999.000000       0.118400       0.475000
53763     53763     shanxi         112.1828       37.7939           89       169     2012      10        22        296              0.126042       7.268127       0.000000       0.284427   -9999.000000       0.221600   -9999.000000       0.385000
53763     53763     shanxi         112.1828       37.7939           89       169     2012      10        23        297              0.126000       7.049835       0.000000       0.273040   -9999.000000   -9999.000000       0.084700       0.424000
53763     53763     shanxi         112.1828       37.7939           89       169     2012      10        24        298              0.127458       8.338959       0.000000       0.270318   -9999.000000       0.351900       0.074000       0.328000
53763     53763     shanxi         112.1828       37.7939           89       169     2012      10        25        299              0.000000       9.907959       0.000000       0.265965       0.144000   -9999.000000       0.090100       0.314000
53763     53763     shanxi         112.1828       37.7939           89       169     2012      10        26        300              0.125792      10.465271       0.419613       0.263258       0.160500       0.227900       0.088200       0.320000
53763     53763     shanxi         112.1828       37.7939           89       169     2012      10        27        301              0.126583       7.819977       0.000000       0.264846       0.161000       0.197500       0.093700       0.465000
53763     53763     shanxi         112.1828       37.7939           89       169     2012      10        28        302              0.000000       9.646149       0.000000       0.261624       0.159000   -9999.000000   -9999.000000       0.379000
53763     53763     shanxi         112.1828       37.7939           89       169     2012      10        29        303              0.125708      10.653778       0.000000       0.260229   -9999.000000       0.108800       0.061200   -9999.000000
53763     53763     shanxi         112.1828       37.7939           89       169     2012      10        30        304              0.123333       8.308899       0.000000       0.254508       0.140000   -9999.000000       0.074500       0.117000
53763     53763     shanxi         112.1828       37.7939           89       169     2012      10        31        305              0.122750       6.059387       0.000000       0.253402       0.136000       0.308200       0.070800       0.291000
53763     53763     shanxi         112.1828       37.7939           89       169     2012      11        01        306              0.122667       6.654877       0.000000       0.252403       0.135000   -9999.000000       0.068300       0.432000
53763     53763     shanxi         112.1828       37.7939           89       169     2012      11        02        307              0.122917       7.610046       0.739950       0.253443       0.143000   -9999.000000       0.080800       0.312000
53763     53763     shanxi         112.1828       37.7939           89       169     2012      11        03        308              0.120000       9.004181       0.000000       0.254789   -9999.000000   -9999.000000       0.070300   -9999.000000
53763     53763     shanxi         112.1828       37.7939           89       169     2012      11        04        309              0.116708       1.592316       0.000000       0.217183   -9999.000000       0.070200       0.040900       0.285000
53763     53763     shanxi         112.1828       37.7939           89       169     2012      11        05        310              0.114375      -0.945190       0.000000       0.183952       0.156000   -9999.000000       0.068400       0.252000
53763     53763     shanxi         112.1828       37.7939           89       169     2012      11        06        311              0.117417       2.765137       0.000000       0.226196       0.161000       0.038700       0.067000       0.470000
53763     53763     shanxi         112.1828       37.7939           89       169     2012      11        07        312              0.118000       4.957062       0.175684       0.247073       0.171000   -9999.000000       0.079400       0.296000
53763     53763     shanxi         112.1828       37.7939           89       169     2012      11        08        313              0.118625       4.011139       0.078045       0.240687   -9999.000000   -9999.000000   -9999.000000   -9999.000000
53763     53763     shanxi         112.1828       37.7939           89       169     2012      11        09        314              0.120125       4.548615       4.076176       0.246784   -9999.000000       0.267100       0.073200       0.383000
53763     53763     shanxi         112.1828       37.7939           89       169     2012      11        10        315              0.119625       4.170135       2.758615       0.259913   -9999.000000   -9999.000000       0.060600       0.227000
53763     53763     shanxi         112.1828       37.7939           89       169     2012      11        11        316              0.115875       1.061462       0.143375       0.242082       0.149000       0.097600       0.065500       0.328000
53763     53763     shanxi         112.1828       37.7939           89       169     2012      11        12        317              0.109708      -0.122650       0.305269       0.208322       0.156000   -9999.000000       0.064800       0.216000
53763     53763     shanxi         112.1828       37.7939           89       169     2012      11        13        318              0.000000       1.344360       0.181187       0.224744       0.157000       0.158100       0.069300   -9999.000000
53763     53763     shanxi         112.1828       37.7939           89       169     2012      11        14        319              0.103125       1.000732       0.167714       0.214842   -9999.000000       0.094800   -9999.000000       0.281000
53763     53763     shanxi         112.1828       37.7939           89       169     2012      11        15        320              0.105250       2.176544       0.499950       0.226069   -9999.000000   -9999.000000       0.042500       0.238000
53763     53763     shanxi         112.1828       37.7939           89       169     2012      11        16        321              0.103333       0.338959       0.292306       0.213227       0.140000       0.044600       0.064700       0.256000
53763     53763     shanxi         112.1828       37.7939           89       169     2012      11        17        322              0.000000       0.702118       0.000000       0.211522       0.163000   -9999.000000       0.063900       0.116000
53763     53763     shanxi         112.1828       37.7939           89       169     2012      11        18        323              0.099333       2.388947       0.000000       0.228288       0.172000   -9999.000000       0.073900   -9999.000000
53763     53763     shanxi         112.1828       37.7939           89       169     2012      11        19        324              0.100833       2.749084       0.000000       0.231608   -9999.000000       0.029200       0.072300       0.094000
53763     53763     shanxi         112.1828       37.7939           89       169     2012      11        20        325              0.109917       2.774994       0.000000       0.234939   -9999.000000   -9999.000000       0.069600       0.289000
53763     53763     shanxi         112.1828       37.7939           89       169     2012      11        21        326              0.119125       2.834442       0.000000       0.248087       0.135000       0.028600       0.055200       0.304000
53763     53763     shanxi         112.1828       37.7939           89       169     2012      11        22        327              0.121000       3.940643       0.000000       0.254859   -9999.000000   -9999.000000       0.065100       0.090000
53763     53763     shanxi         112.1828       37.7939           89       169     2012      11        23        328              0.115625       0.815887       0.000000       0.221866       0.139000       0.144900       0.055800       0.080000
53763     53763     shanxi         112.1828       37.7939           89       169     2012      11        24        329              0.096375      -1.054993       0.000000       0.190822   -9999.000000       0.011100       0.069000       0.144000
53763     53763     shanxi         112.1828       37.7939           89       169     2012      11        25        330              0.096958       0.577972       0.000000       0.200047   -9999.000000   -9999.000000   -9999.000000       0.213000
53763     53763     shanxi         112.1828       37.7939           89       169     2012      11        26        331              0.074583      -0.874969       0.000000       0.188596       0.121000   -9999.000000   -9999.000000       0.169000
53763     53763     shanxi         112.1828       37.7939           89       169     2012      11        27        332              0.062125      -0.692200       0.000000       0.187776       0.131000       0.116700       0.056400   -9999.000000
53763     53763     shanxi         112.1828       37.7939           89       169     2012      11        28        333              0.057042       0.517792       0.000000       0.203558       0.129000       0.271300       0.046700       0.127000
53763     53763     shanxi         112.1828       37.7939           89       169     2012      11        29        334              0.046208      -2.159760       4.984142       0.175027       0.145000       0.138700       0.049600       0.029000
53763     53763     shanxi         112.1828       37.7939           89       169     2012      11        30        335              0.042875      -1.713501       0.035330       0.178348   -9999.000000   -9999.000000       0.059500       0.175000
53763     53763     shanxi         112.1828       37.7939           89       169     2012      12        01        336              0.040958      -0.698425       0.414575       0.183946   -9999.000000       0.153400   -9999.000000       0.189000
53763     53763     shanxi         112.1828       37.7939           89       169     2012      12        02        337              0.036333      -2.585724       0.000000       0.167031   -9999.000000       0.128100       0.039100   -9999.000000
53763     53763     shanxi         112.1828       37.7939           89       169     2012      12        03        338              0.035667      -2.176422       0.000000       0.162469   -9999.000000       0.238100       0.059700       0.041000
53763     53763     shanxi         112.1828       37.7939           89       169     2012      12        04        339              0.035042      -3.857300       0.000000       0.157662       0.130000       0.056000       0.053000       0.041000
53763     53763     shanxi         112.1828       37.7939           89       169     2012      12        05        340              0.032500      -1.234589       0.000000       0.182136   -9999.000000   -9999.000000       0.055200       0.099000
53763     53763     shanxi         112.1828       37.7939           89       169     2012      12        06        341              0.032125      -4.934265       0.000000       0.150230   -9999.000000       0.233600   -9999.000000       0.004000
53763     53763     shanxi         112.1828       37.7939           89       169     2012      12        07        342              0.030750      -2.628387       0.000000       0.166151   -9999.000000   -9999.000000       0.050900   -9999.000000
53763     53763     shanxi         112.1828       37.7939           89       169     2012      12        08        343              0.027000      -4.392914       0.000000       0.152172   -9999.000000   -9999.000000       0.042400       0.042000
53763     53763     shanxi         112.1828       37.7939           89       169     2012      12        09        344              0.027000      -6.770111       0.089952       0.134698       0.134000   -9999.000000       0.058000       0.036000
53763     53763     shanxi         112.1828       37.7939           89       169     2012      12        10        345              0.027167      -3.784027       0.000000       0.161730   -9999.000000   -9999.000000       0.047000       0.139000
53763     53763     shanxi         112.1828       37.7939           89       169     2012      12        11        346              0.026333      -3.064240       0.000000       0.168224   -9999.000000       0.194300       0.055400       0.013000
53763     53763     shanxi         112.1828       37.7939           89       169     2012      12        12        347              0.025542      -3.910248       0.924041       0.156944   -9999.000000   -9999.000000   -9999.000000   -9999.000000
53763     53763     shanxi         112.1828       37.7939           89       169     2012      12        13        348              0.026333      -4.143768       0.797341       0.152865   -9999.000000   -9999.000000       0.047900       0.034000
53763     53763     shanxi         112.1828       37.7939           89       169     2012      12        14        349              0.028917      -3.904388       0.413104       0.143192   -9999.000000   -9999.000000       0.054500       0.049000
53763     53763     shanxi         112.1828       37.7939           89       169     2012      12        15        350              0.000000      -2.412994       0.000000       0.167041   -9999.000000       0.140900       0.050700       0.090000
53763     53763     shanxi         112.1828       37.7939           89       169     2012      12        16        351              0.033500      -1.215576       0.049316       0.174051   -9999.000000       0.143900   -9999.000000       0.071000
53763     53763     shanxi         112.1828       37.7939           89       169     2012      12        17        352              0.030417      -0.843079       0.000000       0.186921   -9999.000000       0.080200       0.054300   -9999.000000
53763     53763     shanxi         112.1828       37.7939           89       169     2012      12        18        353              0.026750      -3.668518       0.000000       0.167431   -9999.000000   -9999.000000       0.051400       0.022000
53763     53763     shanxi         112.1828       37.7939           89       169     2012      12        19        354              0.025917      -4.811218       0.000000       0.148415   -9999.000000       0.113000       0.028600       0.093000
53763     53763     shanxi         112.1828       37.7939           89       169     2012      12        20        355              0.000000      -4.808380       0.166890       0.139846   -9999.000000       0.136900       0.051000       0.052000
53763     53763     shanxi         112.1828       37.7939           89       169     2012      12        21        356              0.027250      -4.785461       0.392032       0.140429   -9999.000000       0.257100       0.043700       0.005000
53763     53763     shanxi         112.1828       37.7939           89       169     2012      12        22        357              0.025167      -5.779663       0.000000       0.143605   -9999.000000   -9999.000000       0.050900       0.079000
53763     53763     shanxi         112.1828       37.7939           89       169     2012      12        23        358              0.021667     -10.382233       0.000000       0.129105   -9999.000000   -9999.000000   -9999.000000       0.028000
53763     53763     shanxi         112.1828       37.7939           89       169     2012      12        24        359              0.020941     -11.594666       0.000000       0.124399   -9999.000000   -9999.000000       0.045800   -9999.000000
53763     53763     shanxi         112.1828       37.7939           89       169     2012      12        25        360              0.021583      -8.048737       0.000000       0.130082   -9999.000000   -9999.000000       0.037200       0.004000
53763     53763     shanxi         112.1828       37.7939           89       169     2012      12        26        361              0.000000      -6.689911       0.000000       0.128918   -9999.000000       0.213900       0.049600   -9999.000000
53763     53763     shanxi         112.1828       37.7939           89       169     2012      12        27        362              0.022000      -5.737122       0.000000       0.139557   -9999.000000   -9999.000000       0.044600   -9999.000000
53763     53763     shanxi         112.1828       37.7939           89       169     2012      12        28        363              0.022000      -5.228790       1.064031       0.144888   -9999.000000   -9999.000000       0.049600       0.034000
53763     53763     shanxi         112.1828       37.7939           89       169     2012      12        29        364              0.000000      -6.051208       0.000000       0.139894   -9999.000000   -9999.000000   -9999.000000       0.113000
53763     53763     shanxi         112.1828       37.7939           89       169     2012      12        30        365              0.000000      -9.754120       0.000000       0.129268   -9999.000000   -9999.000000       0.037900       0.055000
53763     53763     shanxi         112.1828       37.7939           89       169     2012      12        31        366              0.021333      -7.983582       0.000000       0.129530   -9999.000000   -9999.000000       0.050500   -9999.000000
