# Supplementary material for: Research on Fusing Multisatellite Soil Moisture Data Based on Bayesian Model Averaging
Source: Hindawi journal article supplement (doi:10.1155/2018/9310838), 2018-06-25
Supplement: f1 [file 9310838.f1.zip › 2012_sm00-10cm_daily_ZDB_ZHY_53764_366days_allin.txt]

53764     53764     shanxi         111.1000       37.5000           90       164     2012      01        01        001              0.000000   -9999.000000       0.000000   -9999.000000       0.060000   -9999.000000       0.037200   -9999.000000
53764     53764     shanxi         111.1000       37.5000           90       164     2012      01        02        002              0.103750      -3.074615       0.000000       0.161426   -9999.000000   -9999.000000       0.038300       0.084000
53764     53764     shanxi         111.1000       37.5000           90       164     2012      01        03        003              0.000000      -3.920807       0.000000       0.155730   -9999.000000       0.076800       0.039900   -9999.000000
53764     53764     shanxi         111.1000       37.5000           90       164     2012      01        04        004              0.100500      -6.169708       0.000000       0.137037   -9999.000000   -9999.000000       0.033100   -9999.000000
53764     53764     shanxi         111.1000       37.5000           90       164     2012      01        05        005              0.100583      -6.417572       0.000000       0.138858   -9999.000000   -9999.000000       0.039200       0.005000
53764     53764     shanxi         111.1000       37.5000           90       164     2012      01        06        006              0.101833      -5.344971       0.000000       0.143685       0.063000   -9999.000000       0.035800       0.048000
53764     53764     shanxi         111.1000       37.5000           90       164     2012      01        07        007              0.105000      -3.358612       0.000000       0.157452   -9999.000000   -9999.000000       0.040000       0.070000
53764     53764     shanxi         111.1000       37.5000           90       164     2012      01        08        008              0.000000      -2.182434       0.000000       0.165781       0.065000   -9999.000000   -9999.000000   -9999.000000
53764     53764     shanxi         111.1000       37.5000           90       164     2012      01        09        009              0.103250      -2.608032       0.000000       0.169602   -9999.000000   -9999.000000   -9999.000000   -9999.000000
53764     53764     shanxi         111.1000       37.5000           90       164     2012      01        10        010              0.101958      -2.829132       0.000000       0.166412   -9999.000000   -9999.000000       0.033300       0.007000
53764     53764     shanxi         111.1000       37.5000           90       164     2012      01        11        011              0.101292      -3.315399       0.000000       0.163526       0.055000   -9999.000000       0.036900       0.095000
53764     53764     shanxi         111.1000       37.5000           90       164     2012      01        12        012              0.101000      -3.922913       0.000000       0.157198       0.057000   -9999.000000       0.033600       0.106000
53764     53764     shanxi         111.1000       37.5000           90       164     2012      01        13        013              0.100583      -3.763336       0.000000       0.158894       0.062000   -9999.000000       0.035700   -9999.000000
53764     53764     shanxi         111.1000       37.5000           90       164     2012      01        14        014              0.100958      -3.323944       0.000000       0.159617   -9999.000000   -9999.000000   -9999.000000       0.075000
53764     53764     shanxi         111.1000       37.5000           90       164     2012      01        15        015              0.101417      -3.065979       0.000000       0.162625   -9999.000000   -9999.000000       0.032500       0.014000
53764     53764     shanxi         111.1000       37.5000           90       164     2012      01        16        016              0.101708      -2.247498       0.000000       0.169091   -9999.000000   -9999.000000       0.032700       0.053000
53764     53764     shanxi         111.1000       37.5000           90       164     2012      01        17        017              0.000000      -2.063202       0.000000       0.172111       0.058000       0.060400       0.030800       0.056000
53764     53764     shanxi         111.1000       37.5000           90       164     2012      01        18        018              0.103958      -1.365265       0.000000       0.180098       0.063000       0.056200       0.033100   -9999.000000
53764     53764     shanxi         111.1000       37.5000           90       164     2012      01        19        019              0.105292      -1.361023       0.000000       0.179618   -9999.000000   -9999.000000       0.033700       0.144000
53764     53764     shanxi         111.1000       37.5000           90       164     2012      01        20        020              0.105750      -0.704041       0.256571       0.183615   -9999.000000   -9999.000000       0.034200       0.057000
53764     53764     shanxi         111.1000       37.5000           90       164     2012      01        21        021              0.103083      -3.014282       0.000000       0.161167   -9999.000000   -9999.000000       0.024600       0.038000
53764     53764     shanxi         111.1000       37.5000           90       164     2012      01        22        022              0.100250      -6.743195       0.000000       0.139490   -9999.000000   -9999.000000       0.028400       0.066000
53764     53764     shanxi         111.1000       37.5000           90       164     2012      01        23        023              0.098667      -8.676971       0.000000       0.129066   -9999.000000   -9999.000000       0.028800   -9999.000000
53764     53764     shanxi         111.1000       37.5000           90       164     2012      01        24        024              0.098000      -8.621063       0.000000       0.128294   -9999.000000   -9999.000000   -9999.000000       0.031000
53764     53764     shanxi         111.1000       37.5000           90       164     2012      01        25        025              0.097917      -8.700439       0.000000       0.127577   -9999.000000   -9999.000000   -9999.000000       0.088000
53764     53764     shanxi         111.1000       37.5000           90       164     2012      01        26        026              0.098792      -6.736816       0.000000       0.134944   -9999.000000   -9999.000000       0.030400       0.042000
53764     53764     shanxi         111.1000       37.5000           90       164     2012      01        27        027              0.099792      -4.507660       0.000000       0.149933       0.063000       0.111100       0.031500       0.038000
53764     53764     shanxi         111.1000       37.5000           90       164     2012      01        28        028              0.100958      -2.823151       0.000000       0.163138   -9999.000000   -9999.000000       0.032700   -9999.000000
53764     53764     shanxi         111.1000       37.5000           90       164     2012      01        29        029              0.102208      -2.013947       0.000000       0.173772       0.066000   -9999.000000       0.034300       0.067000
53764     53764     shanxi         111.1000       37.5000           90       164     2012      01        30        030              0.101875      -1.752655       0.000000       0.177129   -9999.000000       0.053300       0.036000   -9999.000000
53764     53764     shanxi         111.1000       37.5000           90       164     2012      01        31        031              0.103708      -1.118500       0.000000       0.180939   -9999.000000       0.019500   -9999.000000       0.082000
53764     53764     shanxi         111.1000       37.5000           90       164     2012      02        01        032              0.100292       0.025604       0.000000       0.193769       0.058000   -9999.000000       0.030200       0.084000
53764     53764     shanxi         111.1000       37.5000           90       164     2012      02        02        033              0.098667      -3.836365       0.000000       0.162386       0.060000       0.027100       0.035700       0.034000
53764     53764     shanxi         111.1000       37.5000           90       164     2012      02        03        034              0.100250      -4.514801       0.000000       0.153480       0.065000   -9999.000000       0.032300       0.063000
53764     53764     shanxi         111.1000       37.5000           90       164     2012      02        04        035              0.103167      -2.498505       0.000000       0.166662       0.066000   -9999.000000       0.037200       0.093000
53764     53764     shanxi         111.1000       37.5000           90       164     2012      02        05        036              0.105083      -0.383698       0.000000       0.186516   -9999.000000   -9999.000000       0.036200       0.086000
53764     53764     shanxi         111.1000       37.5000           90       164     2012      02        06        037              0.101042       0.237610       0.000000       0.194357   -9999.000000   -9999.000000       0.038700   -9999.000000
53764     53764     shanxi         111.1000       37.5000           90       164     2012      02        07        038              0.098750      -4.214325       0.000000       0.159790       0.060000   -9999.000000       0.030600   -9999.000000
53764     53764     shanxi         111.1000       37.5000           90       164     2012      02        08        039              0.097667      -5.039825       0.000000       0.149194   -9999.000000   -9999.000000       0.038800       0.020000
53764     53764     shanxi         111.1000       37.5000           90       164     2012      02        09        040              0.098542      -6.209564       0.000000       0.137796   -9999.000000   -9999.000000       0.036200       0.045000
53764     53764     shanxi         111.1000       37.5000           90       164     2012      02        10        041              0.099958      -4.866913       0.000000       0.148209   -9999.000000   -9999.000000       0.035400       0.032000
53764     53764     shanxi         111.1000       37.5000           90       164     2012      02        11        042              0.104174      -3.205811       0.000000       0.164442   -9999.000000   -9999.000000   -9999.000000   -9999.000000
53764     53764     shanxi         111.1000       37.5000           90       164     2012      02        12        043              0.108458      -0.220428       0.000000       0.184662   -9999.000000   -9999.000000   -9999.000000       0.034000
53764     53764     shanxi         111.1000       37.5000           90       164     2012      02        13        044              0.109917       0.226654       0.000000       0.193014       0.065000       0.051700   -9999.000000       0.064000
53764     53764     shanxi         111.1000       37.5000           90       164     2012      02        14        045              0.109708       1.065094       0.000000       0.202580       0.064000   -9999.000000       0.038000       0.145000
53764     53764     shanxi         111.1000       37.5000           90       164     2012      02        15        046              0.109875       0.853516       0.000000       0.200399   -9999.000000   -9999.000000       0.039700       0.095000
53764     53764     shanxi         111.1000       37.5000           90       164     2012      02        16        047              0.106417       0.664917       0.000000       0.198396   -9999.000000   -9999.000000       0.038400   -9999.000000
53764     53764     shanxi         111.1000       37.5000           90       164     2012      02        17        048              0.104083      -1.082336       0.000000       0.182360       0.057000   -9999.000000   -9999.000000       0.038000
53764     53764     shanxi         111.1000       37.5000           90       164     2012      02        18        049              0.103667      -2.187103       4.304297       0.173904       0.056000   -9999.000000       0.036000       0.151000
53764     53764     shanxi         111.1000       37.5000           90       164     2012      02        19        050              0.107792      -2.800842       0.000000       0.179379       0.063000   -9999.000000       0.043200       0.033000
53764     53764     shanxi         111.1000       37.5000           90       164     2012      02        20        051              0.116917      -0.130951       0.000000       0.192517       0.068000   -9999.000000       0.042800       0.107000
53764     53764     shanxi         111.1000       37.5000           90       164     2012      02        21        052              0.134667       2.344910       0.000000       0.214143   -9999.000000       0.041300   -9999.000000   -9999.000000
53764     53764     shanxi         111.1000       37.5000           90       164     2012      02        22        053              0.164458       4.460388       0.000000       0.230857       0.068000   -9999.000000       0.050500       0.157000
53764     53764     shanxi         111.1000       37.5000           90       164     2012      02        23        054              0.178917       5.184418       0.000000       0.233300       0.061000       0.016100       0.045700       0.207000
53764     53764     shanxi         111.1000       37.5000           90       164     2012      02        24        055              0.170542       4.391998       0.404237       0.234698       0.078000   -9999.000000       0.038800       0.282000
53764     53764     shanxi         111.1000       37.5000           90       164     2012      02        25        056              0.140208       2.199677       0.000000       0.218658   -9999.000000   -9999.000000       0.043000       0.162000
53764     53764     shanxi         111.1000       37.5000           90       164     2012      02        26        057              0.134833      -0.008789       0.000000       0.196419   -9999.000000       0.045400       0.044500   -9999.000000
53764     53764     shanxi         111.1000       37.5000           90       164     2012      02        27        058              0.148167       2.073120       0.000000       0.208954   -9999.000000   -9999.000000   -9999.000000       0.132000
53764     53764     shanxi         111.1000       37.5000           90       164     2012      02        28        059              0.158208       3.726471       0.000000       0.222274       0.060000       0.032600   -9999.000000   -9999.000000
53764     53764     shanxi         111.1000       37.5000           90       164     2012      02        29        060              0.000000   -9999.000000       0.000000   -9999.000000       0.072000   -9999.000000   -9999.000000   -9999.000000
53764     53764     shanxi         111.1000       37.5000           90       164     2012      03        01        061              0.193792       4.034698       0.000000       0.227485       0.074000   -9999.000000       0.048000       0.351000
53764     53764     shanxi         111.1000       37.5000           90       164     2012      03        02        062              0.206042       3.863129       0.000000       0.235731   -9999.000000       0.029200       0.044600       0.289000
53764     53764     shanxi         111.1000       37.5000           90       164     2012      03        03        063              0.210458       3.987732       0.355797       0.236739   -9999.000000       0.289500       0.050700       0.382000
53764     53764     shanxi         111.1000       37.5000           90       164     2012      03        04        064              0.215250       3.489380       0.000000       0.230670       0.081000       0.097100       0.053500       0.479000
53764     53764     shanxi         111.1000       37.5000           90       164     2012      03        05        065              0.209792       4.724274       0.391696       0.236208       0.080000   -9999.000000   -9999.000000       0.316000
53764     53764     shanxi         111.1000       37.5000           90       164     2012      03        06        066              0.180375       3.399292       0.192884       0.218692       0.076000   -9999.000000       0.039800   -9999.000000
53764     53764     shanxi         111.1000       37.5000           90       164     2012      03        07        067              0.000000       2.270325       0.000000       0.208679   -9999.000000       0.024400       0.051100       0.308000
53764     53764     shanxi         111.1000       37.5000           90       164     2012      03        08        068              0.205000       4.857361       0.000000       0.222766   -9999.000000   -9999.000000       0.049800       0.328000
53764     53764     shanxi         111.1000       37.5000           90       164     2012      03        09        069              0.209458       4.250305       0.894258       0.227411       0.069000   -9999.000000       0.061200       0.561000
53764     53764     shanxi         111.1000       37.5000           90       164     2012      03        10        070              0.203625       4.634430       0.000000       0.231236       0.064000   -9999.000000   -9999.000000       0.365000
53764     53764     shanxi         111.1000       37.5000           90       164     2012      03        11        071              0.200833       5.740021       0.000000       0.222461       0.066000       0.099300       0.050800   -9999.000000
53764     53764     shanxi         111.1000       37.5000           90       164     2012      03        12        072              0.204625       5.262817       0.000000       0.223450       0.070000   -9999.000000       0.041100       0.298000
53764     53764     shanxi         111.1000       37.5000           90       164     2012      03        13        073              0.202083       7.299683       0.000000       0.222673   -9999.000000   -9999.000000       0.049700       0.359000
53764     53764     shanxi         111.1000       37.5000           90       164     2012      03        14        074              0.204130       7.961700       0.000000       0.222527       0.069000   -9999.000000   -9999.000000       0.332000
53764     53764     shanxi         111.1000       37.5000           90       164     2012      03        15        075              0.203875      10.086914       0.181870       0.222440       0.083500       0.041200       0.063000       0.469000
53764     53764     shanxi         111.1000       37.5000           90       164     2012      03        16        076              0.203250       6.486115       0.000000       0.227654       0.067000       0.170000   -9999.000000   -9999.000000
53764     53764     shanxi         111.1000       37.5000           90       164     2012      03        17        077              0.202292      10.034607       0.000000       0.225005       0.065000       0.040100       0.046200       0.359000
53764     53764     shanxi         111.1000       37.5000           90       164     2012      03        18        078              0.201167      11.739380       0.000000       0.220155       0.082000   -9999.000000       0.057500       0.399000
53764     53764     shanxi         111.1000       37.5000           90       164     2012      03        19        079              0.200417       9.492950       0.000000       0.217977       0.076000   -9999.000000       0.049300       0.374000
53764     53764     shanxi         111.1000       37.5000           90       164     2012      03        20        080              0.200167       8.234100       0.000000       0.219807       0.066000       0.059700       0.051900       0.274000
53764     53764     shanxi         111.1000       37.5000           90       164     2012      03        21        081              0.200375      10.064484       0.170141       0.218328       0.089000   -9999.000000       0.064200   -9999.000000
53764     53764     shanxi         111.1000       37.5000           90       164     2012      03        22        082              0.221458       6.164612       0.109874       0.221765       0.097000   -9999.000000   -9999.000000       0.698000
53764     53764     shanxi         111.1000       37.5000           90       164     2012      03        23        083              0.212125       6.142944       0.000000       0.224422   -9999.000000   -9999.000000       0.043500       0.374000
53764     53764     shanxi         111.1000       37.5000           90       164     2012      03        24        084              0.204917       7.426849       0.000000       0.215800   -9999.000000   -9999.000000   -9999.000000       0.469000
53764     53764     shanxi         111.1000       37.5000           90       164     2012      03        25        085              0.000000      10.282288       0.000000       0.212204       0.059000       0.072800       0.049900       0.259000
53764     53764     shanxi         111.1000       37.5000           90       164     2012      03        26        086              0.201083      11.662659       0.000000       0.206381       0.055000   -9999.000000       0.057900   -9999.000000
53764     53764     shanxi         111.1000       37.5000           90       164     2012      03        27        087              0.198458      12.926117       0.000000       0.200137       0.058000       0.054300   -9999.000000       0.274000
53764     53764     shanxi         111.1000       37.5000           90       164     2012      03        28        088              0.197333      14.109589       0.045352       0.193979       0.083000   -9999.000000       0.065000   -9999.000000
53764     53764     shanxi         111.1000       37.5000           90       164     2012      03        29        089              0.199792      14.798584       0.000000       0.192556   -9999.000000   -9999.000000       0.047800       0.249000
53764     53764     shanxi         111.1000       37.5000           90       164     2012      03        30        090              0.196000      15.089325       0.000000       0.191140       0.049000       0.199400       0.053100       0.214000
53764     53764     shanxi         111.1000       37.5000           90       164     2012      03        31        091              0.194917      10.826721       0.068564       0.188678       0.059000   -9999.000000       0.045600       0.193000
53764     53764     shanxi         111.1000       37.5000           90       164     2012      04        01        092              0.193435      14.125519       0.000000       0.186395       0.060000       0.171400       0.052700       0.347000
53764     53764     shanxi         111.1000       37.5000           90       164     2012      04        02        093              0.189375      16.326752       0.000000       0.183708       0.063000       0.107900   -9999.000000       0.344000
53764     53764     shanxi         111.1000       37.5000           90       164     2012      04        03        094              0.188125      11.373322       0.000000       0.184283   -9999.000000   -9999.000000       0.045800       0.218000
53764     53764     shanxi         111.1000       37.5000           90       164     2012      04        04        095              0.186167      13.925476       0.000000       0.181532   -9999.000000       0.138600       0.052000   -9999.000000
53764     53764     shanxi         111.1000       37.5000           90       164     2012      04        05        096              0.183542      15.977020       0.000000       0.177717       0.056500   -9999.000000       0.042100       0.152000
53764     53764     shanxi         111.1000       37.5000           90       164     2012      04        06        097              0.181125      16.485352       0.000000       0.174750       0.059000   -9999.000000       0.044200       0.305000
53764     53764     shanxi         111.1000       37.5000           90       164     2012      04        07        098              0.179522      17.204742       0.000000       0.172595       0.057000       0.030700       0.049000       0.283000
53764     53764     shanxi         111.1000       37.5000           90       164     2012      04        08        099              0.177625      18.367828       0.000000       0.170329       0.063000   -9999.000000   -9999.000000       0.175000
53764     53764     shanxi         111.1000       37.5000           90       164     2012      04        09        100              0.175167      19.951599       0.151396       0.168287       0.065000       0.049500       0.040100   -9999.000000
53764     53764     shanxi         111.1000       37.5000           90       164     2012      04        10        101              0.173708      20.397888       2.029633       0.169252       0.066000   -9999.000000       0.066200       0.056000
53764     53764     shanxi         111.1000       37.5000           90       164     2012      04        11        102              0.193458      18.324310       2.751483       0.194224       0.064000   -9999.000000       0.052400       0.784000
53764     53764     shanxi         111.1000       37.5000           90       164     2012      04        12        103              0.214000      12.909363       0.415088       0.219692       0.062000   -9999.000000       0.057800       0.691000
53764     53764     shanxi         111.1000       37.5000           90       164     2012      04        13        104              0.203333      14.066925       0.000000       0.220405       0.067000   -9999.000000   -9999.000000       0.205000
53764     53764     shanxi         111.1000       37.5000           90       164     2012      04        14        105              0.196792      17.243134       0.000000       0.202133       0.066000   -9999.000000       0.047000   -9999.000000
53764     53764     shanxi         111.1000       37.5000           90       164     2012      04        15        106              0.191667      18.053314       0.000000       0.189897       0.052500   -9999.000000       0.045700       0.114000
53764     53764     shanxi         111.1000       37.5000           90       164     2012      04        16        107              0.186708      20.363983       0.000000       0.179388       0.051000   -9999.000000       0.053800       0.238000
53764     53764     shanxi         111.1000       37.5000           90       164     2012      04        17        108              0.181583      20.149750       0.000000       0.171747       0.055000       0.175200       0.046800       0.191000
53764     53764     shanxi         111.1000       37.5000           90       164     2012      04        18        109              0.179167      20.272644      10.314483       0.169728       0.057000   -9999.000000   -9999.000000       0.463000
53764     53764     shanxi         111.1000       37.5000           90       164     2012      04        19        110              0.175333      20.401154       0.000000       0.243376       0.065000       0.031300   -9999.000000   -9999.000000
53764     53764     shanxi         111.1000       37.5000           90       164     2012      04        20        111              0.173542      17.252075       0.114289       0.244363       0.054500       0.090600       0.048000       0.105000
53764     53764     shanxi         111.1000       37.5000           90       164     2012      04        21        112              0.172000      19.383331       0.000000       0.225192       0.049000   -9999.000000       0.053400       0.116000
53764     53764     shanxi         111.1000       37.5000           90       164     2012      04        22        113              0.169652      21.223969       0.887354       0.206124       0.052000       0.038500   -9999.000000       0.147000
53764     53764     shanxi         111.1000       37.5000           90       164     2012      04        23        114              0.193542      22.936737      12.797998       0.200900       0.051000   -9999.000000       0.051200       0.256000
53764     53764     shanxi         111.1000       37.5000           90       164     2012      04        24        115              0.241208      25.340912       0.216406       0.231349   -9999.000000       0.124100       0.073400   -9999.000000
53764     53764     shanxi         111.1000       37.5000           90       164     2012      04        25        116              0.000000      16.815460       0.000000       0.269342       0.069000       0.107000       0.063400       0.226000
53764     53764     shanxi         111.1000       37.5000           90       164     2012      04        26        117              0.204917      16.341522       0.000000       0.241179       0.053500   -9999.000000       0.046300   -9999.000000
53764     53764     shanxi         111.1000       37.5000           90       164     2012      04        27        118              0.198174      20.097900       0.000000       0.223333       0.051000       0.108000   -9999.000000       0.303000
53764     53764     shanxi         111.1000       37.5000           90       164     2012      04        28        119              0.192500      21.609863       0.168620       0.208203       0.053000   -9999.000000       0.047300       0.156000
53764     53764     shanxi         111.1000       37.5000           90       164     2012      04        29        120              0.187250      23.539886       0.000000       0.196615       0.061000   -9999.000000       0.052500       0.120000
53764     53764     shanxi         111.1000       37.5000           90       164     2012      04        30        121              0.182000      25.700226       0.098437       0.186343       0.060000       0.069300   -9999.000000       0.208000
53764     53764     shanxi         111.1000       37.5000           90       164     2012      05        01        122              0.176542      25.249603       0.676450       0.182056       0.063500   -9999.000000       0.056300       0.258000
53764     53764     shanxi         111.1000       37.5000           90       164     2012      05        02        123              0.175042      20.820312       0.174616       0.193415       0.057500       0.042700       0.050500       0.160000
53764     53764     shanxi         111.1000       37.5000           90       164     2012      05        03        124              0.170667      24.878021       0.000000       0.185346       0.053000   -9999.000000       0.055700   -9999.000000
53764     53764     shanxi         111.1000       37.5000           90       164     2012      05        04        125              0.166167      25.283478       0.000000       0.176092       0.056000   -9999.000000       0.049300       0.126000
53764     53764     shanxi         111.1000       37.5000           90       164     2012      05        05        126              0.162250      26.806763       0.546536       0.170071       0.056000       0.266100       0.048700       0.157000
53764     53764     shanxi         111.1000       37.5000           90       164     2012      05        06        127              0.159083      27.380646       0.035547       0.166222       0.051500   -9999.000000   -9999.000000       0.233000
53764     53764     shanxi         111.1000       37.5000           90       164     2012      05        07        128              0.154125      28.604919       0.000000       0.164105   -9999.000000       0.098700       0.048500       0.204000
53764     53764     shanxi         111.1000       37.5000           90       164     2012      05        08        129              0.152500      25.347595       0.504941       0.166445       0.050000       0.043400       0.053400   -9999.000000
53764     53764     shanxi         111.1000       37.5000           90       164     2012      05        09        130              0.149500      29.002045       0.000000       0.164249       0.050000   -9999.000000       0.046600       0.177000
53764     53764     shanxi         111.1000       37.5000           90       164     2012      05        10        131              0.146957      28.852722       2.135340       0.163013   -9999.000000   -9999.000000       0.049400       0.169000
53764     53764     shanxi         111.1000       37.5000           90       164     2012      05        11        132              0.147583      29.194855       0.177084       0.168806       0.072500   -9999.000000       0.064200       0.765000
53764     53764     shanxi         111.1000       37.5000           90       164     2012      05        12        133              0.149208      21.773529       0.000000       0.194113       0.054500   -9999.000000       0.055000       0.156000
53764     53764     shanxi         111.1000       37.5000           90       164     2012      05        13        134              0.146250      21.010590       0.000000       0.176374       0.051000       0.055600       0.042200   -9999.000000
53764     53764     shanxi         111.1000       37.5000           90       164     2012      05        14        135              0.145000      19.608398       1.139239       0.169955       0.046000   -9999.000000       0.058900       0.084000
53764     53764     shanxi         111.1000       37.5000           90       164     2012      05        15        136              0.142083      21.825348       0.000000       0.164693       0.056000   -9999.000000       0.047700       0.222000
53764     53764     shanxi         111.1000       37.5000           90       164     2012      05        16        137              0.138542      23.465576       0.000000       0.161270       0.057000   -9999.000000       0.052900       0.158000
53764     53764     shanxi         111.1000       37.5000           90       164     2012      05        17        138              0.135542      24.030121       0.000000       0.159494       0.052500       0.097600   -9999.000000       0.153000
53764     53764     shanxi         111.1000       37.5000           90       164     2012      05        18        139              0.132833      26.271027       0.111660       0.158193       0.061000       0.052800       0.056000   -9999.000000
53764     53764     shanxi         111.1000       37.5000           90       164     2012      05        19        140              0.128792      28.665894       0.155170       0.158567       0.049000   -9999.000000       0.052200       0.141000
53764     53764     shanxi         111.1000       37.5000           90       164     2012      05        20        141              0.124292      30.339508       0.669703       0.157658   -9999.000000   -9999.000000       0.060800       0.213000
53764     53764     shanxi         111.1000       37.5000           90       164     2012      05        21        142              0.121000      29.680054       2.077989       0.158476       0.084000   -9999.000000       0.076700       0.607000
53764     53764     shanxi         111.1000       37.5000           90       164     2012      05        22        143              0.124333      19.338867       0.000000       0.195160       0.060500   -9999.000000       0.055900       0.116000
53764     53764     shanxi         111.1000       37.5000           90       164     2012      05        23        144              0.124500      22.471466       0.049249       0.183824   -9999.000000       0.032300   -9999.000000   -9999.000000
53764     53764     shanxi         111.1000       37.5000           90       164     2012      05        24        145              0.122875      22.526428       0.000000       0.170604       0.057000   -9999.000000       0.052600       0.123000
53764     53764     shanxi         111.1000       37.5000           90       164     2012      05        25        146              0.000000      25.149384       0.034315       0.163315       0.067000       0.165500       0.060100   -9999.000000
53764     53764     shanxi         111.1000       37.5000           90       164     2012      05        26        147              0.116958      26.215790       0.000000       0.159868       0.060000       0.019600       0.050100       0.173000
53764     53764     shanxi         111.1000       37.5000           90       164     2012      05        27        148              0.113333      28.032684       0.000000       0.157630       0.051000   -9999.000000       0.053000       0.131000
53764     53764     shanxi         111.1000       37.5000           90       164     2012      05        28        149              0.129250      29.611847       9.874704       0.155928       0.044000       0.269200       0.052500       0.042000
53764     53764     shanxi         111.1000       37.5000           90       164     2012      05        29        150              0.218000      27.671967       0.000000       0.195287       0.059000   -9999.000000       0.066000       0.429000
53764     53764     shanxi         111.1000       37.5000           90       164     2012      05        30        151              0.186708      23.977539       0.321821       0.233172       0.054000   -9999.000000       0.051000   -9999.000000
53764     53764     shanxi         111.1000       37.5000           90       164     2012      05        31        152              0.167042      25.720093       1.298993       0.200484       0.086000       0.071200       0.045700   -9999.000000
53764     53764     shanxi         111.1000       37.5000           90       164     2012      06        01        153              0.154417      25.494293       0.064968       0.198314       0.068000       0.198300       0.056400   -9999.000000
53764     53764     shanxi         111.1000       37.5000           90       164     2012      06        02        154              0.141125      26.266418       0.540079       0.188338       0.057500       0.022700       0.055900       0.149000
53764     53764     shanxi         111.1000       37.5000           90       164     2012      06        03        155              0.132292      25.924347       0.093982       0.178880       0.064000   -9999.000000   -9999.000000       0.139000
53764     53764     shanxi         111.1000       37.5000           90       164     2012      06        04        156              0.124875      26.960327       0.000000       0.175681       0.054000       0.160600       0.065500       0.278000
53764     53764     shanxi         111.1000       37.5000           90       164     2012      06        05        157              0.116292      29.335175       0.099715       0.165306   -9999.000000       0.024300       0.073500       0.210000
53764     53764     shanxi         111.1000       37.5000           90       164     2012      06        06        158              0.109792      29.031219       0.108111       0.161674       0.068000   -9999.000000       0.062500   -9999.000000
53764     53764     shanxi         111.1000       37.5000           90       164     2012      06        07        159              0.107875      24.042908       6.504833       0.165363       0.068500   -9999.000000       0.062100       0.061000
53764     53764     shanxi         111.1000       37.5000           90       164     2012      06        08        160              0.106250      24.471893       0.000000       0.222451       0.061000   -9999.000000       0.070200       0.309000
53764     53764     shanxi         111.1000       37.5000           90       164     2012      06        09        161              0.103833      25.316956       9.622593       0.209964       0.051000   -9999.000000   -9999.000000       0.242000
53764     53764     shanxi         111.1000       37.5000           90       164     2012      06        10        162              0.099250      28.780457       0.000000       0.184723       0.064000       0.021100       0.058400       0.155000
53764     53764     shanxi         111.1000       37.5000           90       164     2012      06        11        163              0.000000      26.278961       0.000000       0.171390       0.061000   -9999.000000       0.069700   -9999.000000
53764     53764     shanxi         111.1000       37.5000           90       164     2012      06        12        164              0.093792      27.421631       0.000000       0.164284       0.053000       0.037600       0.062400       0.087000
53764     53764     shanxi         111.1000       37.5000           90       164     2012      06        13        165              0.091917      29.535278       0.226329       0.159939       0.056000       0.082300       0.065500       0.155000
53764     53764     shanxi         111.1000       37.5000           90       164     2012      06        14        166              0.091750      29.885681       0.000000       0.159330       0.054000       0.110800   -9999.000000       0.166000
53764     53764     shanxi         111.1000       37.5000           90       164     2012      06        15        167              0.090333      27.842529       0.000000       0.157701       0.056000       0.129200       0.069200       0.149000
53764     53764     shanxi         111.1000       37.5000           90       164     2012      06        16        168              0.089333      28.407776       0.000000       0.156266       0.058000   -9999.000000       0.059900   -9999.000000
53764     53764     shanxi         111.1000       37.5000           90       164     2012      06        17        169              0.088500      30.216400       0.000000       0.154807       0.056500       0.192600       0.068100       0.154000
53764     53764     shanxi         111.1000       37.5000           90       164     2012      06        18        170              0.088000      32.591644       0.995667       0.153864       0.051000       0.023100       0.063500       0.206000
53764     53764     shanxi         111.1000       37.5000           90       164     2012      06        19        171              0.087333      33.415802       0.372841       0.153349       0.056000       0.142800       0.067900       0.210000
53764     53764     shanxi         111.1000       37.5000           90       164     2012      06        20        172              0.087083      30.174164       1.589907       0.157291       0.059000       0.147800   -9999.000000       0.188000
53764     53764     shanxi         111.1000       37.5000           90       164     2012      06        21        173              0.087000      31.347870       0.314036       0.156968       0.066000   -9999.000000       0.070300   -9999.000000
53764     53764     shanxi         111.1000       37.5000           90       164     2012      06        22        174              0.104000      31.391113       8.057945       0.158322   -9999.000000   -9999.000000       0.091500       0.159000
53764     53764     shanxi         111.1000       37.5000           90       164     2012      06        23        175              0.202542      32.694092      20.166698       0.195025       0.043000       0.137500       0.073600   -9999.000000
53764     53764     shanxi         111.1000       37.5000           90       164     2012      06        24        176              0.226583      28.906586       0.326667       0.281746       0.084000       0.243100       0.095400       0.728000
53764     53764     shanxi         111.1000       37.5000           90       164     2012      06        25        177              0.194708      26.585358       0.000000       0.280380       0.073000       0.111900       0.089600   -9999.000000
53764     53764     shanxi         111.1000       37.5000           90       164     2012      06        26        178              0.176833      27.939087       0.908627       0.247079       0.075000   -9999.000000   -9999.000000       0.522000
53764     53764     shanxi         111.1000       37.5000           90       164     2012      06        27        179              0.164000      26.771423       5.212427       0.231627       0.090000   -9999.000000       0.095600       0.668000
53764     53764     shanxi         111.1000       37.5000           90       164     2012      06        28        180              0.263250      25.612549      35.824684       0.240898   -9999.000000       0.301600       0.093900       0.937000
53764     53764     shanxi         111.1000       37.5000           90       164     2012      06        29        181              0.265542      22.110535       3.146696       0.343952       0.104000   -9999.000000       0.102600       1.000000
53764     53764     shanxi         111.1000       37.5000           90       164     2012      06        30        182              0.228250      25.028778       0.000000       0.328042       0.071000       0.344100       0.092000   -9999.000000
53764     53764     shanxi         111.1000       37.5000           90       164     2012      07        01        183              0.205167      27.492493       0.000000       0.294602       0.082000       0.271900   -9999.000000       0.604000
53764     53764     shanxi         111.1000       37.5000           90       164     2012      07        02        184              0.185792      28.715424       0.000000       0.275768       0.078000       0.031000       0.087700       0.508000
53764     53764     shanxi         111.1000       37.5000           90       164     2012      07        03        185              0.170375      29.887360       2.178193       0.258554       0.068500       0.157900       0.091600       0.475000
53764     53764     shanxi         111.1000       37.5000           90       164     2012      07        04        186              0.164792      28.931946       7.281822       0.256587       0.069500   -9999.000000       0.095100       0.609000
53764     53764     shanxi         111.1000       37.5000           90       164     2012      07        05        187              0.154083      27.382477       0.000000       0.282426       0.058000       0.084100       0.080300   -9999.000000
53764     53764     shanxi         111.1000       37.5000           90       164     2012      07        06        188              0.141583      29.052826       0.080813       0.270775   -9999.000000       0.164300       0.083200       0.296000
53764     53764     shanxi         111.1000       37.5000           90       164     2012      07        07        189              0.134083      29.592194       0.106028       0.251323   -9999.000000   -9999.000000   -9999.000000       0.397000
53764     53764     shanxi         111.1000       37.5000           90       164     2012      07        08        190              0.220391      28.062378       8.504864       0.244065       0.104000       0.186500       0.098100       0.543000
53764     53764     shanxi         111.1000       37.5000           90       164     2012      07        09        191              0.248125      25.136902       0.762123       0.289161       0.079000   -9999.000000       0.107300       0.777000
53764     53764     shanxi         111.1000       37.5000           90       164     2012      07        10        192              0.225917      25.951904       0.225959       0.278474       0.066000   -9999.000000       0.084300   -9999.000000
53764     53764     shanxi         111.1000       37.5000           90       164     2012      07        11        193              0.201042      28.600708       0.152723       0.257397       0.071000       0.070400       0.092100       0.571000
53764     53764     shanxi         111.1000       37.5000           90       164     2012      07        12        194              0.178833      29.789459       0.000000       0.238303       0.083000       0.158200       0.086500       0.383000
53764     53764     shanxi         111.1000       37.5000           90       164     2012      07        13        195              0.211583      30.480042       8.512264       0.221350       0.101000       0.061800       0.114600       0.401000
53764     53764     shanxi         111.1000       37.5000           90       164     2012      07        14        196              0.242750      29.133148      21.257494       0.252811       0.071000   -9999.000000       0.111300       0.548000
53764     53764     shanxi         111.1000       37.5000           90       164     2012      07        15        197              0.250000      27.901733       0.329208       0.291752       0.094500   -9999.000000       0.110400   -9999.000000
53764     53764     shanxi         111.1000       37.5000           90       164     2012      07        16        198              0.220500      26.664062       0.000000       0.306432       0.071000       0.190100       0.107900       0.773000
53764     53764     shanxi         111.1000       37.5000           90       164     2012      07        17        199              0.197125      27.586121       0.000000       0.279143       0.092000   -9999.000000       0.112100       0.486000
53764     53764     shanxi         111.1000       37.5000           90       164     2012      07        18        200              0.180667      27.344879       0.000000       0.263817       0.084000       0.116000   -9999.000000       0.511000
53764     53764     shanxi         111.1000       37.5000           90       164     2012      07        19        201              0.168042      27.863861       0.000000       0.251007       0.069000       0.041800       0.103200       0.416000
53764     53764     shanxi         111.1000       37.5000           90       164     2012      07        20        202              0.158696      29.235992       2.989269       0.238171       0.061000       0.033300       0.114200   -9999.000000
53764     53764     shanxi         111.1000       37.5000           90       164     2012      07        21        203              0.243125      28.685883      20.049770       0.246615   -9999.000000       0.130700       0.131900       1.000000
53764     53764     shanxi         111.1000       37.5000           90       164     2012      07        22        204              0.232417      24.291077       1.772402       0.329857       0.110000       0.111800       0.117200   -9999.000000
53764     53764     shanxi         111.1000       37.5000           90       164     2012      07        23        205              0.213333      26.386047       0.337854       0.296001       0.115000       0.025500       0.110700       0.712000
53764     53764     shanxi         111.1000       37.5000           90       164     2012      07        24        206              0.224583      25.866760       4.866856       0.288953       0.119000       0.178000   -9999.000000   -9999.000000
53764     53764     shanxi         111.1000       37.5000           90       164     2012      07        25        207              0.220000      24.658600       0.967268       0.301533       0.112500   -9999.000000       0.106200       0.971000
53764     53764     shanxi         111.1000       37.5000           90       164     2012      07        26        208              0.269292      28.117493      14.465957       0.285674       0.095000       0.226300       0.072100       0.959000
53764     53764     shanxi         111.1000       37.5000           90       164     2012      07        27        209              0.263125      28.659424      12.657932       0.311662       0.114000   -9999.000000       0.112800       0.827000
53764     53764     shanxi         111.1000       37.5000           90       164     2012      07        28        210              0.262542      28.393311       0.134387       0.318398       0.123000       0.337900       0.121200       0.851000
53764     53764     shanxi         111.1000       37.5000           90       164     2012      07        29        211              0.241208      29.582245       0.089587       0.315089       0.118000       0.420500       0.109800   -9999.000000
53764     53764     shanxi         111.1000       37.5000           90       164     2012      07        30        212              0.298000      30.398132      32.938049       0.289911       0.141000   -9999.000000       0.171800       0.848000
53764     53764     shanxi         111.1000       37.5000           90       164     2012      07        31        213              0.279083      25.115723       0.849379       0.356894       0.121000   -9999.000000       0.142000       0.909000
53764     53764     shanxi         111.1000       37.5000           90       164     2012      08        01        214              0.255292      24.548370       0.000000       0.333626       0.133000   -9999.000000       0.153300       0.934000
53764     53764     shanxi         111.1000       37.5000           90       164     2012      08        02        215              0.241292      26.578644       0.209386       0.317138       0.115000   -9999.000000       0.140500       0.751000
53764     53764     shanxi         111.1000       37.5000           90       164     2012      08        03        216              0.229333      28.726288       0.000000       0.302928       0.132000       0.100600       0.140800   -9999.000000
53764     53764     shanxi         111.1000       37.5000           90       164     2012      08        04        217              0.215042      29.018585       0.000000       0.289493       0.114000   -9999.000000   -9999.000000       0.620000
53764     53764     shanxi         111.1000       37.5000           90       164     2012      08        05        218              0.207625      29.475067       0.140934       0.277055       0.107500       0.233400       0.131200       0.585000
53764     53764     shanxi         111.1000       37.5000           90       164     2012      08        06        219              0.202500      28.672058       0.000000       0.270374       0.103000   -9999.000000       0.125900       0.555000
53764     53764     shanxi         111.1000       37.5000           90       164     2012      08        07        220              0.196250      29.159882       0.762489       0.261731       0.098000       0.097100       0.116000       0.385000
53764     53764     shanxi         111.1000       37.5000           90       164     2012      08        08        221              0.221417      30.323761       5.395716       0.252938       0.137000       0.096700       0.135500   -9999.000000
53764     53764     shanxi         111.1000       37.5000           90       164     2012      08        09        222              0.212625      28.183258       0.000000       0.280532       0.118000   -9999.000000       0.129600       0.687000
53764     53764     shanxi         111.1000       37.5000           90       164     2012      08        10        223              0.199250      27.819672       0.000000       0.259274       0.098000       0.145300   -9999.000000       0.533000
53764     53764     shanxi         111.1000       37.5000           90       164     2012      08        11        224              0.194333      28.242035       2.176980       0.244751       0.135500       0.051500       0.122300       0.476000
53764     53764     shanxi         111.1000       37.5000           90       164     2012      08        12        225              0.232708      27.767700       0.619485       0.254776       0.127000       0.115100       0.132300       0.428000
53764     53764     shanxi         111.1000       37.5000           90       164     2012      08        13        226              0.232792      25.852753       1.750214       0.259129       0.154000   -9999.000000       0.138900   -9999.000000
53764     53764     shanxi         111.1000       37.5000           90       164     2012      08        14        227              0.255333      26.946838       7.092842       0.250852       0.163000   -9999.000000       0.173600       0.879000
53764     53764     shanxi         111.1000       37.5000           90       164     2012      08        15        228              0.236417      24.409424       0.000000       0.294443       0.119500   -9999.000000       0.148800       0.646000
53764     53764     shanxi         111.1000       37.5000           90       164     2012      08        16        229              0.222833      26.998199       3.446253       0.265641       0.125500       0.057500       0.176600       0.532000
53764     53764     shanxi         111.1000       37.5000           90       164     2012      08        17        230              0.288542      28.160309      25.943794       0.262009   -9999.000000   -9999.000000       0.158400       0.975000
53764     53764     shanxi         111.1000       37.5000           90       164     2012      08        18        231              0.268739      23.539307       4.723407       0.347910   -9999.000000       0.180600       0.169200   -9999.000000
53764     53764     shanxi         111.1000       37.5000           90       164     2012      08        19        232              0.247292      23.832703       0.000000       0.329843       0.161000   -9999.000000       0.160400       0.809000
53764     53764     shanxi         111.1000       37.5000           90       164     2012      08        20        233              0.233708      26.592072       0.052361       0.304497       0.155000       0.136500       0.173800   -9999.000000
53764     53764     shanxi         111.1000       37.5000           90       164     2012      08        21        234              0.219083      25.838043       0.000000       0.291619       0.129000       0.147100   -9999.000000       0.668000
53764     53764     shanxi         111.1000       37.5000           90       164     2012      08        22        235              0.206458      22.582703       0.000000       0.278387       0.119000   -9999.000000       0.154200   -9999.000000
53764     53764     shanxi         111.1000       37.5000           90       164     2012      08        23        236              0.195750      23.314545       0.000000       0.269797       0.119000       0.099200       0.164600       0.424000
53764     53764     shanxi         111.1000       37.5000           90       164     2012      08        24        237              0.186750      23.969818       0.000000       0.261268   -9999.000000   -9999.000000       0.143300       0.364000
53764     53764     shanxi         111.1000       37.5000           90       164     2012      08        25        238              0.000000      25.155457       0.869400       0.253033       0.148000       0.093400       0.149900   -9999.000000
53764     53764     shanxi         111.1000       37.5000           90       164     2012      08        26        239              0.176000      25.583740       3.499899       0.249261       0.126500       0.205400       0.164600       0.467000
53764     53764     shanxi         111.1000       37.5000           90       164     2012      08        27        240              0.170792      25.882782       0.555878       0.249701       0.129000       0.163000   -9999.000000   -9999.000000
53764     53764     shanxi         111.1000       37.5000           90       164     2012      08        28        241              0.164458      26.574646       0.214540       0.240328       0.113000       0.115800       0.124900       0.414000
53764     53764     shanxi         111.1000       37.5000           90       164     2012      08        29        242              0.157833      27.132294       0.000000       0.232006       0.119000       0.166100       0.132800       0.401000
53764     53764     shanxi         111.1000       37.5000           90       164     2012      08        30        243              0.150750      27.914124       0.081332       0.221773       0.134000       0.177800       0.120700       0.420000
53764     53764     shanxi         111.1000       37.5000           90       164     2012      08        31        244              0.146792      27.396027      12.504700       0.215350       0.134000       0.121900       0.132400       0.474000
53764     53764     shanxi         111.1000       37.5000           90       164     2012      09        01        245              0.261917      24.555634      44.645245       0.241666       0.176000   -9999.000000   -9999.000000   -9999.000000
53764     53764     shanxi         111.1000       37.5000           90       164     2012      09        02        246              0.252458      19.540558       0.079471       0.374140       0.169000       0.126100       0.151600       0.915000
53764     53764     shanxi         111.1000       37.5000           90       164     2012      09        03        247              0.235750      21.521881       0.000000       0.330867       0.139000       0.147500       0.137100       0.791000
53764     53764     shanxi         111.1000       37.5000           90       164     2012      09        04        248              0.224417      21.386078       4.862691       0.314829       0.149000       0.132600       0.159900       0.787000
53764     53764     shanxi         111.1000       37.5000           90       164     2012      09        05        249              0.263417      22.123596      17.382919       0.313289   -9999.000000   -9999.000000       0.148700       0.853000
53764     53764     shanxi         111.1000       37.5000           90       164     2012      09        06        250              0.282042      21.564484       7.688365       0.336436       0.171000   -9999.000000       0.161400   -9999.000000
53764     53764     shanxi         111.1000       37.5000           90       164     2012      09        07        251              0.253083      19.760651       0.315864       0.351876       0.164500       0.137700   -9999.000000       0.853000
53764     53764     shanxi         111.1000       37.5000           90       164     2012      09        08        252              0.240458      22.115051       0.133772       0.328276       0.155000       0.103700       0.140700       0.832000
53764     53764     shanxi         111.1000       37.5000           90       164     2012      09        09        253              0.229250      23.052490       1.167872       0.317574       0.148500       0.346000       0.146400       0.840000
53764     53764     shanxi         111.1000       37.5000           90       164     2012      09        10        254              0.222750      23.094910       1.611665       0.307626       0.168000       0.145400       0.137800       0.816000
53764     53764     shanxi         111.1000       37.5000           90       164     2012      09        11        255              0.220500      20.193054       4.032065       0.311199       0.145500   -9999.000000       0.126300   -9999.000000
53764     53764     shanxi         111.1000       37.5000           90       164     2012      09        12        256              0.215292      20.160248       0.000000       0.317046       0.140000       0.120100       0.139300       0.770000
53764     53764     shanxi         111.1000       37.5000           90       164     2012      09        13        257              0.210042      16.677490       0.000000       0.306482       0.121000       0.089400   -9999.000000       0.589000
53764     53764     shanxi         111.1000       37.5000           90       164     2012      09        14        258              0.205167      17.839691       0.000000       0.299223       0.115000       0.225100       0.111300       0.633000
53764     53764     shanxi         111.1000       37.5000           90       164     2012      09        15        259              0.200292      19.147369       4.721799       0.292959       0.137000       0.114100       0.133200       0.474000
53764     53764     shanxi         111.1000       37.5000           90       164     2012      09        16        260              0.195708      19.869110       0.000000       0.287981       0.137000       0.093600       0.115900   -9999.000000
53764     53764     shanxi         111.1000       37.5000           90       164     2012      09        17        261              0.192333      19.683044       1.351138       0.284545       0.120500       0.150400       0.129600       0.486000
53764     53764     shanxi         111.1000       37.5000           90       164     2012      09        18        262              0.189333      19.668060       0.098172       0.281714       0.114000       0.302800   -9999.000000   -9999.000000
53764     53764     shanxi         111.1000       37.5000           90       164     2012      09        19        263              0.185958      20.730804       0.282094       0.277731       0.107000   -9999.000000       0.121100       0.461000
53764     53764     shanxi         111.1000       37.5000           90       164     2012      09        20        264              0.185375      21.377289       5.584054       0.272322   -9999.000000   -9999.000000       0.144500       0.440000
53764     53764     shanxi         111.1000       37.5000           90       164     2012      09        21        265              0.234667      20.566742       0.998533       0.282326   -9999.000000       0.188400       0.147100       0.853000
53764     53764     shanxi         111.1000       37.5000           90       164     2012      09        22        266              0.224792      18.848541       0.000000       0.300672       0.111500   -9999.000000       0.129200       0.706000
53764     53764     shanxi         111.1000       37.5000           90       164     2012      09        23        267              0.216000      19.930115       0.000000       0.288417       0.109000       0.211900       0.136600       0.673000
53764     53764     shanxi         111.1000       37.5000           90       164     2012      09        24        268              0.208708      21.077911       3.416692       0.280231       0.103000   -9999.000000   -9999.000000       0.559000
53764     53764     shanxi         111.1000       37.5000           90       164     2012      09        25        269              0.269696      21.152954      26.864962       0.281933   -9999.000000       0.288600       0.141600   -9999.000000
53764     53764     shanxi         111.1000       37.5000           90       164     2012      09        26        270              0.254583      16.239380       1.629475       0.357038       0.138000       0.120100       0.151700       0.916000
53764     53764     shanxi         111.1000       37.5000           90       164     2012      09        27        271              0.243643      18.591614       0.000000       0.325196       0.144000   -9999.000000       0.133900       0.682000
53764     53764     shanxi         111.1000       37.5000           90       164     2012      09        28        272              0.227400      16.556366       0.000000       0.311795       0.119500   -9999.000000       0.146300       0.724000
53764     53764     shanxi         111.1000       37.5000           90       164     2012      09        29        273              0.221917      14.927887       0.000000       0.304647       0.112000   -9999.000000       0.140000       0.514000
53764     53764     shanxi         111.1000       37.5000           90       164     2012      09        30        274              0.215375      14.937927       0.000000       0.299463       0.105000   -9999.000000       0.144000   -9999.000000
53764     53764     shanxi         111.1000       37.5000           90       164     2012      10        01        275              0.210625      15.331146       0.000000       0.294712       0.108000       0.087200       0.095700       0.557000
53764     53764     shanxi         111.1000       37.5000           90       164     2012      10        02        276              0.207083      17.459717       0.000000       0.290420       0.102000   -9999.000000       0.117900       0.629000
53764     53764     shanxi         111.1000       37.5000           90       164     2012      10        03        277              0.203583      18.735138       0.000000       0.287502       0.087000       0.254500       0.102200       0.610000
53764     53764     shanxi         111.1000       37.5000           90       164     2012      10        04        278              0.213833      18.379974       3.221580       0.282917       0.114000       0.067700       0.125900       0.622000
53764     53764     shanxi         111.1000       37.5000           90       164     2012      10        05        279              0.215833      15.106689       0.131744       0.295841       0.106000       0.129000   -9999.000000   -9999.000000
53764     53764     shanxi         111.1000       37.5000           90       164     2012      10        06        280              0.209750      15.178223       0.000000       0.290807       0.102000       0.248600       0.112100       0.447000
53764     53764     shanxi         111.1000       37.5000           90       164     2012      10        07        281              0.205333      16.662964       0.912665       0.284570       0.110000   -9999.000000       0.112800       0.597000
53764     53764     shanxi         111.1000       37.5000           90       164     2012      10        08        282              0.201583      15.937592       0.081473       0.283832       0.099000       0.185900       0.129200       0.519000
53764     53764     shanxi         111.1000       37.5000           90       164     2012      10        09        283              0.199000      16.248199       0.000000       0.282334       0.096000       0.272000       0.112800       0.470000
53764     53764     shanxi         111.1000       37.5000           90       164     2012      10        10        284              0.194917      14.482605       0.000000       0.276525       0.091000       0.294200       0.122400   -9999.000000
53764     53764     shanxi         111.1000       37.5000           90       164     2012      10        11        285              0.192625      14.873383       1.021778       0.273052       0.079000   -9999.000000   -9999.000000       0.437000
53764     53764     shanxi         111.1000       37.5000           90       164     2012      10        12        286              0.189625      16.593628       1.136186       0.270529       0.085000   -9999.000000       0.106400       0.573000
53764     53764     shanxi         111.1000       37.5000           90       164     2012      10        13        287              0.185917      16.139008       0.000000       0.267515       0.085000       0.129200       0.123500       0.543000
53764     53764     shanxi         111.1000       37.5000           90       164     2012      10        14        288              0.183875      15.565521       0.202701       0.264161       0.080500       0.100800       0.107400       0.463000
53764     53764     shanxi         111.1000       37.5000           90       164     2012      10        15        289              0.183542      16.346191       4.371225       0.264849       0.100500   -9999.000000       0.111100   -9999.000000
53764     53764     shanxi         111.1000       37.5000           90       164     2012      10        16        290              0.195208      14.691315       0.149026       0.280115       0.093000   -9999.000000       0.119800       0.561000
53764     53764     shanxi         111.1000       37.5000           90       164     2012      10        17        291              0.191667      10.742126       1.255197       0.282047   -9999.000000   -9999.000000       0.115500   -9999.000000
53764     53764     shanxi         111.1000       37.5000           90       164     2012      10        18        292              0.187625      10.740265       0.202132       0.273924   -9999.000000       0.127400       0.088300       0.526000
53764     53764     shanxi         111.1000       37.5000           90       164     2012      10        19        293              0.185583      10.265350       0.000000       0.272234       0.085500       0.083500       0.114200   -9999.000000
53764     53764     shanxi         111.1000       37.5000           90       164     2012      10        20        294              0.183875      12.907806       0.155638       0.269103       0.083000   -9999.000000       0.098500       0.403000
53764     53764     shanxi         111.1000       37.5000           90       164     2012      10        21        295              0.207958      15.484344       4.917890       0.267033   -9999.000000       0.036200       0.120300       0.756000
53764     53764     shanxi         111.1000       37.5000           90       164     2012      10        22        296              0.217042       8.573761       0.199524       0.295068   -9999.000000       0.123900   -9999.000000       0.802000
53764     53764     shanxi         111.1000       37.5000           90       164     2012      10        23        297              0.209292       9.693390       0.203932       0.283941   -9999.000000   -9999.000000       0.097400       0.583000
53764     53764     shanxi         111.1000       37.5000           90       164     2012      10        24        298              0.204417      10.015198       0.000000       0.279025   -9999.000000       0.297500       0.107500   -9999.000000
53764     53764     shanxi         111.1000       37.5000           90       164     2012      10        25        299              0.000000      11.279938       0.000000       0.274980       0.080500       0.244300       0.091700       0.521000
53764     53764     shanxi         111.1000       37.5000           90       164     2012      10        26        300              0.195667      12.299408       0.731338       0.272017       0.088000       0.153400       0.098300       0.645000
53764     53764     shanxi         111.1000       37.5000           90       164     2012      10        27        301              0.194667       9.198303       0.000000       0.278336       0.075000       0.263000       0.106700       0.697000
53764     53764     shanxi         111.1000       37.5000           90       164     2012      10        28        302              0.000000      10.214905       0.438257       0.275317       0.095000   -9999.000000   -9999.000000       0.430000
53764     53764     shanxi         111.1000       37.5000           90       164     2012      10        29        303              0.189000      12.486389       0.000000       0.271811   -9999.000000       0.121600       0.068200   -9999.000000
53764     53764     shanxi         111.1000       37.5000           90       164     2012      10        30        304              0.184167      10.445465       0.000000       0.267756       0.073000   -9999.000000       0.083300       0.380000
53764     53764     shanxi         111.1000       37.5000           90       164     2012      10        31        305              0.180667       8.072693       0.000000       0.265486       0.069000       0.275700       0.073900       0.402000
53764     53764     shanxi         111.1000       37.5000           90       164     2012      11        01        306              0.178708       8.416656       0.000000       0.264066       0.069000       0.140400       0.087900       0.469000
53764     53764     shanxi         111.1000       37.5000           90       164     2012      11        02        307              0.179625       9.557709       0.932296       0.263402       0.075000   -9999.000000   -9999.000000       0.344000
53764     53764     shanxi         111.1000       37.5000           90       164     2012      11        03        308              0.204000      11.228149       0.924381       0.264087   -9999.000000   -9999.000000       0.068800   -9999.000000
53764     53764     shanxi         111.1000       37.5000           90       164     2012      11        04        309              0.201792       2.811646       0.494340       0.246505       0.090000   -9999.000000       0.063600       0.583000
53764     53764     shanxi         111.1000       37.5000           90       164     2012      11        05        310              0.203750       1.506409       0.269553       0.227980       0.083000   -9999.000000       0.067600       0.425000
53764     53764     shanxi         111.1000       37.5000           90       164     2012      11        06        311              0.214792       2.598480       0.063223       0.241661       0.085000       0.067700       0.080000       0.515000
53764     53764     shanxi         111.1000       37.5000           90       164     2012      11        07        312              0.215500       5.097626       0.131308       0.262824       0.089000   -9999.000000       0.089400       0.447000
53764     53764     shanxi         111.1000       37.5000           90       164     2012      11        08        313              0.211083       4.288422       0.000000       0.264826   -9999.000000       0.115400   -9999.000000   -9999.000000
53764     53764     shanxi         111.1000       37.5000           90       164     2012      11        09        314              0.217792       7.029694       1.128701       0.267038       0.108000       0.123000       0.077100       0.838000
53764     53764     shanxi         111.1000       37.5000           90       164     2012      11        10        315              0.242500       5.588196       0.214016       0.273478   -9999.000000       0.105000       0.062300       0.578000
53764     53764     shanxi         111.1000       37.5000           90       164     2012      11        11        316              0.228500       2.642365       0.064512       0.249015       0.098000       0.152600       0.070300       0.521000
53764     53764     shanxi         111.1000       37.5000           90       164     2012      11        12        317              0.222333       2.437592       2.326999       0.239494       0.091000   -9999.000000       0.078900       0.469000
53764     53764     shanxi         111.1000       37.5000           90       164     2012      11        13        318              0.000000       3.256805       0.000000       0.250238   -9999.000000   -9999.000000       0.072600   -9999.000000
53764     53764     shanxi         111.1000       37.5000           90       164     2012      11        14        319              0.213522       3.381500       0.000000       0.247585   -9999.000000       0.074700       0.073200       0.527000
53764     53764     shanxi         111.1000       37.5000           90       164     2012      11        15        320              0.220583       4.418762       0.738898       0.259150   -9999.000000   -9999.000000       0.046200   -9999.000000
53764     53764     shanxi         111.1000       37.5000           90       164     2012      11        16        321              0.226417       2.205475       0.584625       0.251822   -9999.000000       0.060800       0.055600       0.537000
53764     53764     shanxi         111.1000       37.5000           90       164     2012      11        17        322              0.000000       1.958069       0.440826       0.241124       0.088000   -9999.000000       0.072300   -9999.000000
53764     53764     shanxi         111.1000       37.5000           90       164     2012      11        18        323              0.220417       3.467957       0.298077       0.254452       0.090000   -9999.000000       0.072800       0.583000
53764     53764     shanxi         111.1000       37.5000           90       164     2012      11        19        324              0.215125       3.652283       0.000000       0.254854   -9999.000000       0.053100   -9999.000000       0.521000
53764     53764     shanxi         111.1000       37.5000           90       164     2012      11        20        325              0.216667       3.756287       0.000000       0.259324   -9999.000000       0.119700       0.071000       0.616000
53764     53764     shanxi         111.1000       37.5000           90       164     2012      11        21        326              0.215542       3.356720       0.000000       0.265899       0.085000       0.137400       0.063600       0.550000
53764     53764     shanxi         111.1000       37.5000           90       164     2012      11        22        327              0.211042       5.964264       0.000000       0.268137   -9999.000000   -9999.000000       0.059500   -9999.000000
53764     53764     shanxi         111.1000       37.5000           90       164     2012      11        23        328              0.203000       3.030060       0.000000       0.256476       0.082000       0.037900       0.058500       0.465000
53764     53764     shanxi         111.1000       37.5000           90       164     2012      11        24        329              0.185458       2.528809       0.000000       0.234313   -9999.000000       0.047000       0.066500       0.348000
53764     53764     shanxi         111.1000       37.5000           90       164     2012      11        25        330              0.187708       3.130341       0.000000       0.248261   -9999.000000       0.048400   -9999.000000       0.398000
53764     53764     shanxi         111.1000       37.5000           90       164     2012      11        26        331              0.156000       2.133698       0.000000       0.232220       0.072000       0.045600   -9999.000000       0.140000
53764     53764     shanxi         111.1000       37.5000           90       164     2012      11        27        332              0.132042       1.900818       0.000000       0.226868       0.068000       0.088300       0.054400   -9999.000000
53764     53764     shanxi         111.1000       37.5000           90       164     2012      11        28        333              0.113833       2.652222       0.000000       0.230838       0.071000       0.131300       0.050100       0.202000
53764     53764     shanxi         111.1000       37.5000           90       164     2012      11        29        334              0.107208      -0.111328       0.000000       0.198495       0.073000       0.031400       0.052700       0.182000
53764     53764     shanxi         111.1000       37.5000           90       164     2012      11        30        335              0.107667       0.017181       0.000000       0.198168   -9999.000000   -9999.000000       0.056300       0.181000
53764     53764     shanxi         111.1000       37.5000           90       164     2012      12        01        336              0.109708       0.936188       0.030115       0.209885       0.077000       0.022000       0.054500       0.304000
53764     53764     shanxi         111.1000       37.5000           90       164     2012      12        02        337              0.108625       1.033081       0.000000       0.218021       0.070000       0.154100       0.042000   -9999.000000
53764     53764     shanxi         111.1000       37.5000           90       164     2012      12        03        338              0.103208       0.752472       0.000000       0.214633       0.069000       0.154900       0.050500       0.086000
53764     53764     shanxi         111.1000       37.5000           90       164     2012      12        04        339              0.104833      -0.421814       0.000000       0.192453       0.069000       0.071100       0.051000       0.168000
53764     53764     shanxi         111.1000       37.5000           90       164     2012      12        05        340              0.099833       0.331726       0.000000       0.204040   -9999.000000   -9999.000000       0.051800       0.101000
53764     53764     shanxi         111.1000       37.5000           90       164     2012      12        06        341              0.100875      -1.188934       1.440108       0.183118   -9999.000000       0.183600   -9999.000000       0.101000
53764     53764     shanxi         111.1000       37.5000           90       164     2012      12        07        342              0.098958      -0.077179       0.000000       0.202013       0.065000       0.068900       0.044700   -9999.000000
53764     53764     shanxi         111.1000       37.5000           90       164     2012      12        08        343              0.095417      -1.361420       0.340640       0.185484       0.069000       0.271400       0.054100       0.022000
53764     53764     shanxi         111.1000       37.5000           90       164     2012      12        09        344              0.095833      -3.635742       0.101491       0.157226       0.065000   -9999.000000       0.046400       0.080000
53764     53764     shanxi         111.1000       37.5000           90       164     2012      12        10        345              0.096458      -1.988647       0.000000       0.171819   -9999.000000   -9999.000000       0.044800       0.051000
53764     53764     shanxi         111.1000       37.5000           90       164     2012      12        11        346              0.097042      -1.221893       0.000000       0.182250   -9999.000000       0.190700       0.051100       0.122000
53764     53764     shanxi         111.1000       37.5000           90       164     2012      12        12        347              0.098958      -0.483063       0.000000       0.187304       0.058000       0.018000   -9999.000000   -9999.000000
53764     53764     shanxi         111.1000       37.5000           90       164     2012      12        13        348              0.102083       0.383301       0.000000       0.198178   -9999.000000       0.133000       0.045300       0.097000
53764     53764     shanxi         111.1000       37.5000           90       164     2012      12        14        349              0.104958       0.058228      90.752472       0.197175   -9999.000000       0.046900       0.053700   -9999.000000
53764     53764     shanxi         111.1000       37.5000           90       164     2012      12        15        350              0.000000       0.434143       0.000000       0.206756       0.077000   -9999.000000       0.050200       0.216000
53764     53764     shanxi         111.1000       37.5000           90       164     2012      12        16        351              0.112458       1.051971       0.000000       0.214829   -9999.000000       0.096600       0.059600   -9999.000000
53764     53764     shanxi         111.1000       37.5000           90       164     2012      12        17        352              0.104739       0.990051       0.000000       0.219253   -9999.000000       0.127000   -9999.000000       0.146000
53764     53764     shanxi         111.1000       37.5000           90       164     2012      12        18        353              0.098667      -0.845001       0.000000       0.191910       0.062000   -9999.000000       0.049300       0.024000
53764     53764     shanxi         111.1000       37.5000           90       164     2012      12        19        354              0.099708      -1.395325       0.000000       0.178239   -9999.000000       0.025700       0.047000       0.075000
53764     53764     shanxi         111.1000       37.5000           90       164     2012      12        20        355              0.000000      -0.886353       0.037903       0.179608   -9999.000000   -9999.000000       0.051300       0.131000
53764     53764     shanxi         111.1000       37.5000           90       164     2012      12        21        356              0.097458      -1.334961       0.000000       0.178152   -9999.000000       0.118400       0.043100   -9999.000000
53764     53764     shanxi         111.1000       37.5000           90       164     2012      12        22        357              0.093250      -4.361969       0.000000       0.150919   -9999.000000       0.188000       0.047700       0.045000
53764     53764     shanxi         111.1000       37.5000           90       164     2012      12        23        358              0.090917      -6.985779       0.000000       0.137624   -9999.000000   -9999.000000   -9999.000000   -9999.000000
53764     53764     shanxi         111.1000       37.5000           90       164     2012      12        24        359              0.091105      -7.607941       0.000000       0.130770   -9999.000000   -9999.000000       0.042900       0.091000
53764     53764     shanxi         111.1000       37.5000           90       164     2012      12        25        360              0.091417      -5.870758       0.000000       0.135617   -9999.000000       0.022400       0.047400       0.022000
53764     53764     shanxi         111.1000       37.5000           90       164     2012      12        26        361              0.000000      -5.486145       0.000000       0.135072   -9999.000000       0.111600       0.045200   -9999.000000
53764     53764     shanxi         111.1000       37.5000           90       164     2012      12        27        362              0.092917      -4.132294       0.000000       0.146918   -9999.000000       0.042700       0.048100       0.021000
53764     53764     shanxi         111.1000       37.5000           90       164     2012      12        28        363              0.093000      -2.485962       0.000000       0.165582   -9999.000000   -9999.000000       0.049600       0.019000
53764     53764     shanxi         111.1000       37.5000           90       164     2012      12        29        364              0.000000      -4.665924       0.000000       0.148658   -9999.000000   -9999.000000       0.050900       0.014000
53764     53764     shanxi         111.1000       37.5000           90       164     2012      12        30        365              0.000000      -7.395905       0.000000       0.132935   -9999.000000       0.095700       0.040300       0.048000
53764     53764     shanxi         111.1000       37.5000           90       164     2012      12        31        366              0.090800      -6.224762       0.000000       0.136632   -9999.000000   -9999.000000       0.046900   -9999.000000
