# Supplementary material for: Research on Fusing Multisatellite Soil Moisture Data Based on Bayesian Model Averaging
Source: Hindawi journal article supplement (doi:10.1155/2018/9310838), 2018-06-25
Supplement: f1 [file 9310838.f1.zip › 2012_sm00-10cm_daily_ZDB_ZHY_53767_366days_allin.txt]

53767     53767     shanxi         111.1667       37.3333           91       165     2012      01        01        001              0.000000   -9999.000000       0.000000   -9999.000000       0.066000   -9999.000000       0.028500   -9999.000000
53767     53767     shanxi         111.1667       37.3333           91       165     2012      01        02        002              0.042125      -4.218628       0.000000       0.152874   -9999.000000   -9999.000000       0.027700       0.043000
53767     53767     shanxi         111.1667       37.3333           91       165     2012      01        03        003              0.000000      -6.000153       0.000000       0.139452   -9999.000000   -9999.000000   -9999.000000       0.058000
53767     53767     shanxi         111.1667       37.3333           91       165     2012      01        04        004              0.038333      -8.477478       0.000000       0.133145   -9999.000000   -9999.000000       0.023200       0.106000
53767     53767     shanxi         111.1667       37.3333           91       165     2012      01        05        005              0.040125      -8.397949       0.000000       0.131428   -9999.000000   -9999.000000       0.028700       0.059000
53767     53767     shanxi         111.1667       37.3333           91       165     2012      01        06        006              0.045125      -6.214630       0.000000       0.139881       0.066000   -9999.000000       0.028500   -9999.000000
53767     53767     shanxi         111.1667       37.3333           91       165     2012      01        07        007              0.047375      -3.502777       0.000000       0.159529   -9999.000000   -9999.000000       0.029100       0.031000
53767     53767     shanxi         111.1667       37.3333           91       165     2012      01        08        008              0.000000      -3.199127       0.000000       0.158199   -9999.000000   -9999.000000   -9999.000000   -9999.000000
53767     53767     shanxi         111.1667       37.3333           91       165     2012      01        09        009              0.042833      -4.257660       0.000000       0.156833   -9999.000000   -9999.000000   -9999.000000       0.122000
53767     53767     shanxi         111.1667       37.3333           91       165     2012      01        10        010              0.041167      -4.139832       0.000000       0.155999   -9999.000000   -9999.000000       0.024200       0.004000
53767     53767     shanxi         111.1667       37.3333           91       165     2012      01        11        011              0.040500      -5.089600       0.000000       0.151642   -9999.000000   -9999.000000       0.030200       0.219000
53767     53767     shanxi         111.1667       37.3333           91       165     2012      01        12        012              0.041000      -5.633728       0.000000       0.148234       0.062000   -9999.000000       0.026100       0.086000
53767     53767     shanxi         111.1667       37.3333           91       165     2012      01        13        013              0.043625      -4.875366       0.000000       0.152636   -9999.000000   -9999.000000       0.026300   -9999.000000
53767     53767     shanxi         111.1667       37.3333           91       165     2012      01        14        014              0.043250      -4.371338       0.000000       0.153661   -9999.000000   -9999.000000   -9999.000000       0.167000
53767     53767     shanxi         111.1667       37.3333           91       165     2012      01        15        015              0.046042      -4.339905       0.000000       0.154787   -9999.000000   -9999.000000       0.025400       0.061000
53767     53767     shanxi         111.1667       37.3333           91       165     2012      01        16        016              0.043583      -2.757446       0.000000       0.169454   -9999.000000   -9999.000000       0.024800       0.209000
53767     53767     shanxi         111.1667       37.3333           91       165     2012      01        17        017              0.000000      -3.491425       0.000000       0.160162       0.065000       0.125200       0.023700       0.082000
53767     53767     shanxi         111.1667       37.3333           91       165     2012      01        18        018              0.048708      -2.404816       0.000000       0.174014       0.069000   -9999.000000       0.025800   -9999.000000
53767     53767     shanxi         111.1667       37.3333           91       165     2012      01        19        019              0.050125      -1.913757       0.000000       0.182931   -9999.000000   -9999.000000       0.024700       0.141000
53767     53767     shanxi         111.1667       37.3333           91       165     2012      01        20        020              0.048417      -1.106323       0.000000       0.187431   -9999.000000   -9999.000000   -9999.000000       0.042000
53767     53767     shanxi         111.1667       37.3333           91       165     2012      01        21        021              0.046458      -3.468781       0.000000       0.160125   -9999.000000   -9999.000000       0.017500       0.190000
53767     53767     shanxi         111.1667       37.3333           91       165     2012      01        22        022              0.043500      -8.073273       0.000000       0.136240   -9999.000000   -9999.000000       0.018700       0.093000
53767     53767     shanxi         111.1667       37.3333           91       165     2012      01        23        023              0.040333      -9.992157       0.000000       0.130366   -9999.000000   -9999.000000       0.022000   -9999.000000
53767     53767     shanxi         111.1667       37.3333           91       165     2012      01        24        024              0.038458      -9.949615       0.000000       0.128990   -9999.000000   -9999.000000   -9999.000000       0.058000
53767     53767     shanxi         111.1667       37.3333           91       165     2012      01        25        025              0.037750      -9.908752       0.000000       0.128971   -9999.000000   -9999.000000   -9999.000000       0.038000
53767     53767     shanxi         111.1667       37.3333           91       165     2012      01        26        026              0.039750      -7.914673       0.000000       0.132183   -9999.000000   -9999.000000       0.023400       0.213000
53767     53767     shanxi         111.1667       37.3333           91       165     2012      01        27        027              0.041917      -5.568817       0.000000       0.148669       0.066000   -9999.000000       0.024100       0.072000
53767     53767     shanxi         111.1667       37.3333           91       165     2012      01        28        028              0.042833      -3.480865       0.000000       0.160679       0.066000   -9999.000000       0.024200   -9999.000000
53767     53767     shanxi         111.1667       37.3333           91       165     2012      01        29        029              0.044542      -3.434845       0.000000       0.167134   -9999.000000   -9999.000000       0.026300       0.068000
53767     53767     shanxi         111.1667       37.3333           91       165     2012      01        30        030              0.045875      -3.172485       0.000000       0.171881   -9999.000000       0.046000       0.027500       0.115000
53767     53767     shanxi         111.1667       37.3333           91       165     2012      01        31        031              0.051667      -2.321411       0.000000       0.177970   -9999.000000   -9999.000000   -9999.000000       0.184000
53767     53767     shanxi         111.1667       37.3333           91       165     2012      02        01        032              0.041708      -0.338013       0.000000       0.199991   -9999.000000   -9999.000000       0.023800       0.045000
53767     53767     shanxi         111.1667       37.3333           91       165     2012      02        02        033              0.040208      -5.945770       0.000000       0.149334   -9999.000000   -9999.000000       0.024500       0.087000
53767     53767     shanxi         111.1667       37.3333           91       165     2012      02        03        034              0.044333      -6.496490       0.000000       0.142538       0.072000   -9999.000000       0.026300       0.028000
53767     53767     shanxi         111.1667       37.3333           91       165     2012      02        04        035              0.049583      -3.728058       0.000000       0.158867       0.073000   -9999.000000       0.027700   -9999.000000
53767     53767     shanxi         111.1667       37.3333           91       165     2012      02        05        036              0.054250      -1.554169       0.000000       0.185398   -9999.000000   -9999.000000       0.026500       0.129000
53767     53767     shanxi         111.1667       37.3333           91       165     2012      02        06        037              0.042875      -0.697937       0.000000       0.194622   -9999.000000   -9999.000000       0.026400   -9999.000000
53767     53767     shanxi         111.1667       37.3333           91       165     2012      02        07        038              0.039375      -6.443695       0.000000       0.146361   -9999.000000   -9999.000000       0.020600       0.132000
53767     53767     shanxi         111.1667       37.3333           91       165     2012      02        08        039              0.036583      -7.501556       0.065924       0.133950   -9999.000000   -9999.000000       0.026900       0.086000
53767     53767     shanxi         111.1667       37.3333           91       165     2012      02        09        040              0.039167      -8.976837       0.000000       0.131740   -9999.000000   -9999.000000       0.025500       0.178000
53767     53767     shanxi         111.1667       37.3333           91       165     2012      02        10        041              0.042083      -7.119904       0.000000       0.135535   -9999.000000   -9999.000000       0.025700       0.293000
53767     53767     shanxi         111.1667       37.3333           91       165     2012      02        11        042              0.049917      -5.360809       0.000000       0.152920   -9999.000000   -9999.000000   -9999.000000   -9999.000000
53767     53767     shanxi         111.1667       37.3333           91       165     2012      02        12        043              0.052792      -1.270508       0.000000       0.184121   -9999.000000       0.024900   -9999.000000       0.182000
53767     53767     shanxi         111.1667       37.3333           91       165     2012      02        13        044              0.052542      -0.661041       0.388152       0.193201       0.071000   -9999.000000   -9999.000000       0.108000
53767     53767     shanxi         111.1667       37.3333           91       165     2012      02        14        045              0.052875      -0.559204       0.000000       0.198029       0.067000   -9999.000000       0.028800       0.369000
53767     53767     shanxi         111.1667       37.3333           91       165     2012      02        15        046              0.053583      -0.463959       0.000000       0.197669   -9999.000000   -9999.000000       0.032900       0.187000
53767     53767     shanxi         111.1667       37.3333           91       165     2012      02        16        047              0.047417      -0.999237       0.000000       0.194781   -9999.000000   -9999.000000       0.026800   -9999.000000
53767     53767     shanxi         111.1667       37.3333           91       165     2012      02        17        048              0.044458      -3.613983       0.000000       0.165211       0.055000   -9999.000000   -9999.000000       0.237000
53767     53767     shanxi         111.1667       37.3333           91       165     2012      02        18        049              0.044042      -4.855865       0.577548       0.153333       0.060000   -9999.000000       0.027500       0.165000
53767     53767     shanxi         111.1667       37.3333           91       165     2012      02        19        050              0.050250      -4.853455       0.000000       0.159351       0.069000   -9999.000000       0.030200       0.200000
53767     53767     shanxi         111.1667       37.3333           91       165     2012      02        20        051              0.062958      -0.938812       0.000000       0.188576       0.072000   -9999.000000       0.030800       0.226000
53767     53767     shanxi         111.1667       37.3333           91       165     2012      02        21        052              0.083792       1.656372       0.000000       0.215643   -9999.000000   -9999.000000   -9999.000000   -9999.000000
53767     53767     shanxi         111.1667       37.3333           91       165     2012      02        22        053              0.103875       3.482697       0.000000       0.236048       0.069000       0.159400       0.037200       0.220000
53767     53767     shanxi         111.1667       37.3333           91       165     2012      02        23        054              0.102250       4.007965       0.000000       0.240412       0.061000       0.012000       0.032700       0.336000
53767     53767     shanxi         111.1667       37.3333           91       165     2012      02        24        055              0.084958       2.361542       0.000000       0.231905   -9999.000000   -9999.000000       0.026800       0.340000
53767     53767     shanxi         111.1667       37.3333           91       165     2012      02        25        056              0.060125       0.440308       0.000000       0.212716   -9999.000000   -9999.000000       0.029300       0.082000
53767     53767     shanxi         111.1667       37.3333           91       165     2012      02        26        057              0.066875      -1.041107       0.000000       0.187119   -9999.000000       0.010400       0.033100   -9999.000000
53767     53767     shanxi         111.1667       37.3333           91       165     2012      02        27        058              0.080208       0.257507       0.000000       0.203179   -9999.000000   -9999.000000   -9999.000000       0.159000
53767     53767     shanxi         111.1667       37.3333           91       165     2012      02        28        059              0.077792       2.292572       0.000000       0.221607       0.067000       0.013800   -9999.000000       0.346000
53767     53767     shanxi         111.1667       37.3333           91       165     2012      02        29        060              0.000000   -9999.000000       0.000000   -9999.000000       0.074000   -9999.000000   -9999.000000   -9999.000000
53767     53767     shanxi         111.1667       37.3333           91       165     2012      03        01        061              0.108542       2.719788       0.000000       0.233686       0.083000   -9999.000000       0.034800       0.322000
53767     53767     shanxi         111.1667       37.3333           91       165     2012      03        02        062              0.114625       2.521454       0.000000       0.241325   -9999.000000   -9999.000000       0.034100       0.394000
53767     53767     shanxi         111.1667       37.3333           91       165     2012      03        03        063              0.098792       2.105255       0.000000       0.238803   -9999.000000   -9999.000000       0.034700       0.278000
53767     53767     shanxi         111.1667       37.3333           91       165     2012      03        04        064              0.091208       1.605286       0.000000       0.226025       0.081000       0.080700       0.039400   -9999.000000
53767     53767     shanxi         111.1667       37.3333           91       165     2012      03        05        065              0.081417       2.439911       0.000000       0.233238       0.089000   -9999.000000   -9999.000000       0.259000
53767     53767     shanxi         111.1667       37.3333           91       165     2012      03        06        066              0.061292       0.865082       0.107949       0.214402       0.084000   -9999.000000       0.028500   -9999.000000
53767     53767     shanxi         111.1667       37.3333           91       165     2012      03        07        067              0.000000      -0.122894       0.000000       0.201544   -9999.000000       0.015300       0.037200       0.462000
53767     53767     shanxi         111.1667       37.3333           91       165     2012      03        08        068              0.105750       2.978638       0.000000       0.227808   -9999.000000   -9999.000000       0.040000       0.307000
53767     53767     shanxi         111.1667       37.3333           91       165     2012      03        09        069              0.118375       2.613342       0.000000       0.237556       0.075000   -9999.000000       0.046900       0.665000
53767     53767     shanxi         111.1667       37.3333           91       165     2012      03        10        070              0.123542       2.774933       0.000000       0.236843       0.072000   -9999.000000       0.040900       0.346000
53767     53767     shanxi         111.1667       37.3333           91       165     2012      03        11        071              0.124417       3.174835       0.000000       0.228289       0.070000   -9999.000000       0.040600   -9999.000000
53767     53767     shanxi         111.1667       37.3333           91       165     2012      03        12        072              0.141000       3.395996       0.000000       0.232138       0.074000       0.063600       0.028800       0.568000
53767     53767     shanxi         111.1667       37.3333           91       165     2012      03        13        073              0.147708       4.376068       0.000000       0.236360   -9999.000000   -9999.000000       0.039300       0.311000
53767     53767     shanxi         111.1667       37.3333           91       165     2012      03        14        074              0.156304       5.913635       0.000000       0.243205       0.079000   -9999.000000   -9999.000000       0.678000
53767     53767     shanxi         111.1667       37.3333           91       165     2012      03        15        075              0.155500       7.718567       0.198038       0.252402       0.083000       0.027600       0.044000       0.548000
53767     53767     shanxi         111.1667       37.3333           91       165     2012      03        16        076              0.154333       3.720612       0.000000       0.252450       0.071000   -9999.000000   -9999.000000   -9999.000000
53767     53767     shanxi         111.1667       37.3333           91       165     2012      03        17        077              0.153542       7.501160       0.000000       0.252130       0.071000       0.261200       0.034000       0.623000
53767     53767     shanxi         111.1667       37.3333           91       165     2012      03        18        078              0.151458       9.867096       0.000000       0.251184       0.084000   -9999.000000       0.036500       0.574000
53767     53767     shanxi         111.1667       37.3333           91       165     2012      03        19        079              0.148125       7.587738       0.000000       0.249833   -9999.000000       0.305700       0.045500       0.483000
53767     53767     shanxi         111.1667       37.3333           91       165     2012      03        20        080              0.149500       4.485687       0.000000       0.249817       0.065000       0.152000       0.043200       0.392000
53767     53767     shanxi         111.1667       37.3333           91       165     2012      03        21        081              0.147333       7.333038       3.492651       0.252285   -9999.000000   -9999.000000       0.052200   -9999.000000
53767     53767     shanxi         111.1667       37.3333           91       165     2012      03        22        082              0.164458       3.644623       0.000000       0.248393       0.101000   -9999.000000   -9999.000000       0.647000
53767     53767     shanxi         111.1667       37.3333           91       165     2012      03        23        083              0.148708       3.507233       0.659900       0.248220   -9999.000000   -9999.000000       0.035000       0.454000
53767     53767     shanxi         111.1667       37.3333           91       165     2012      03        24        084              0.146708       4.399963       0.000000       0.236901   -9999.000000   -9999.000000   -9999.000000       0.640000
53767     53767     shanxi         111.1667       37.3333           91       165     2012      03        25        085              0.000000       7.317505       0.000000       0.238158       0.066000       0.189700       0.041400       0.439000
53767     53767     shanxi         111.1667       37.3333           91       165     2012      03        26        086              0.148208       9.041168       0.000000       0.239274       0.067000   -9999.000000       0.052100   -9999.000000
53767     53767     shanxi         111.1667       37.3333           91       165     2012      03        27        087              0.146458      10.459473       0.000000       0.235150       0.068000       0.066400   -9999.000000       0.666000
53767     53767     shanxi         111.1667       37.3333           91       165     2012      03        28        088              0.148417      11.274353       0.450645       0.230188       0.076000   -9999.000000       0.059200       0.620000
53767     53767     shanxi         111.1667       37.3333           91       165     2012      03        29        089              0.153083      12.249359       0.000000       0.229488   -9999.000000   -9999.000000       0.040500       0.561000
53767     53767     shanxi         111.1667       37.3333           91       165     2012      03        30        090              0.144667      11.751129       0.000000       0.228418       0.058000   -9999.000000       0.045600       0.311000
53767     53767     shanxi         111.1667       37.3333           91       165     2012      03        31        091              0.145375       7.193970       0.000000       0.226186       0.068500   -9999.000000       0.043000       0.404000
53767     53767     shanxi         111.1667       37.3333           91       165     2012      04        01        092              0.145458      11.597443       0.000000       0.222521       0.066000       0.023100       0.047200       0.421000
53767     53767     shanxi         111.1667       37.3333           91       165     2012      04        02        093              0.138125      14.081421       0.000000       0.218163       0.063000       0.060300   -9999.000000   -9999.000000
53767     53767     shanxi         111.1667       37.3333           91       165     2012      04        03        094              0.138875       7.893158       0.000000       0.219433   -9999.000000   -9999.000000       0.041800       0.338000
53767     53767     shanxi         111.1667       37.3333           91       165     2012      04        04        095              0.139250      10.734802       0.000000       0.216753       0.070000       0.029700       0.047800   -9999.000000
53767     53767     shanxi         111.1667       37.3333           91       165     2012      04        05        096              0.137917      12.905670       0.026070       0.211511       0.063500   -9999.000000       0.039100       0.458000
53767     53767     shanxi         111.1667       37.3333           91       165     2012      04        06        097              0.135958      12.695770       0.000000       0.207518       0.062000   -9999.000000       0.041400       0.377000
53767     53767     shanxi         111.1667       37.3333           91       165     2012      04        07        098              0.136125      13.079803       0.000000       0.203363       0.064000   -9999.000000       0.044400       0.605000
53767     53767     shanxi         111.1667       37.3333           91       165     2012      04        08        099              0.136000      14.775024       0.000000       0.197897       0.072000   -9999.000000   -9999.000000       0.388000
53767     53767     shanxi         111.1667       37.3333           91       165     2012      04        09        100              0.134333      16.805206       0.312342       0.192549       0.072000       0.061500       0.037000   -9999.000000
53767     53767     shanxi         111.1667       37.3333           91       165     2012      04        10        101              0.132708      16.871277       0.683664       0.191004       0.066000   -9999.000000       0.055700       0.465000
53767     53767     shanxi         111.1667       37.3333           91       165     2012      04        11        102              0.134625      15.233368       1.714335       0.200712       0.070000       0.135900       0.043400       0.520000
53767     53767     shanxi         111.1667       37.3333           91       165     2012      04        12        103              0.142708      11.686371       1.908697       0.217717       0.070000   -9999.000000       0.056000       0.902000
53767     53767     shanxi         111.1667       37.3333           91       165     2012      04        13        104              0.144000      10.577301       0.000000       0.241729       0.076000   -9999.000000   -9999.000000       0.339000
53767     53767     shanxi         111.1667       37.3333           91       165     2012      04        14        105              0.141125      13.724854       0.000000       0.224561       0.074000       0.017300       0.043500   -9999.000000
53767     53767     shanxi         111.1667       37.3333           91       165     2012      04        15        106              0.139417      14.791779       0.000000       0.213698       0.060500   -9999.000000       0.039300       0.459000
53767     53767     shanxi         111.1667       37.3333           91       165     2012      04        16        107              0.136667      16.639709       0.000000       0.203248       0.059500   -9999.000000       0.051900       0.570000
53767     53767     shanxi         111.1667       37.3333           91       165     2012      04        17        108              0.133083      16.196930       0.000000       0.194149       0.060000   -9999.000000       0.046600       0.440000
53767     53767     shanxi         111.1667       37.3333           91       165     2012      04        18        109              0.132917      16.692841       7.176705       0.190525       0.064000   -9999.000000   -9999.000000       0.750000
53767     53767     shanxi         111.1667       37.3333           91       165     2012      04        19        110              0.131667      17.680115       0.000000       0.240432       0.068000       0.180300   -9999.000000   -9999.000000
53767     53767     shanxi         111.1667       37.3333           91       165     2012      04        20        111              0.131000      14.888733       0.656438       0.244184       0.073000       0.054200       0.046300       0.288000
53767     53767     shanxi         111.1667       37.3333           91       165     2012      04        21        112              0.132042      15.539948       0.000000       0.237633       0.058500   -9999.000000       0.056600       0.290000
53767     53767     shanxi         111.1667       37.3333           91       165     2012      04        22        113              0.132292      17.341644       2.541724       0.221097       0.062000       0.093600   -9999.000000       0.393000
53767     53767     shanxi         111.1667       37.3333           91       165     2012      04        23        114              0.147125      20.578674      10.225805       0.229288       0.060000   -9999.000000       0.047400       0.357000
53767     53767     shanxi         111.1667       37.3333           91       165     2012      04        24        115              0.196792      22.611938       0.845532       0.243166       0.093000       0.240400       0.072700   -9999.000000
53767     53767     shanxi         111.1667       37.3333           91       165     2012      04        25        116              0.000000      13.483643       0.000000       0.278397       0.082000       0.063100   -9999.000000       0.576000
53767     53767     shanxi         111.1667       37.3333           91       165     2012      04        26        117              0.164542      12.903351       0.000000       0.252767       0.062000   -9999.000000       0.046200       0.502000
53767     53767     shanxi         111.1667       37.3333           91       165     2012      04        27        118              0.159917      17.209229       0.000000       0.238889       0.061000       0.193000   -9999.000000       0.329000
53767     53767     shanxi         111.1667       37.3333           91       165     2012      04        28        119              0.155917      18.648468       1.656250       0.225597       0.055000   -9999.000000       0.046300       0.524000
53767     53767     shanxi         111.1667       37.3333           91       165     2012      04        29        120              0.151208      20.288666       0.000000       0.228455       0.069000       0.137500       0.051100       0.265000
53767     53767     shanxi         111.1667       37.3333           91       165     2012      04        30        121              0.147667      21.825989       2.081494       0.214899       0.067000       0.159000   -9999.000000       0.345000
53767     53767     shanxi         111.1667       37.3333           91       165     2012      05        01        122              0.141625      21.777588       0.532104       0.205943       0.077000   -9999.000000       0.046500   -9999.000000
53767     53767     shanxi         111.1667       37.3333           91       165     2012      05        02        123              0.141875      19.074615       0.000000       0.208779       0.067000   -9999.000000       0.042900       0.309000
53767     53767     shanxi         111.1667       37.3333           91       165     2012      05        03        124              0.139958      21.359558       0.000000       0.200760       0.061000   -9999.000000       0.052900   -9999.000000
53767     53767     shanxi         111.1667       37.3333           91       165     2012      05        04        125              0.135542      22.499756       0.000000       0.190132       0.069000       0.073500       0.039800       0.323000
53767     53767     shanxi         111.1667       37.3333           91       165     2012      05        05        126              0.134458      22.569641       0.000000       0.183040       0.062000       0.067200       0.043300       0.496000
53767     53767     shanxi         111.1667       37.3333           91       165     2012      05        06        127              0.132250      23.960297       0.086052       0.176502       0.058000   -9999.000000   -9999.000000       0.429000
53767     53767     shanxi         111.1667       37.3333           91       165     2012      05        07        128              0.128792      25.332367       0.000000       0.173210   -9999.000000       0.056400       0.048000       0.321000
53767     53767     shanxi         111.1667       37.3333           91       165     2012      05        08        129              0.129000      23.389832       0.438936       0.174546       0.058000       0.061800       0.060200   -9999.000000
53767     53767     shanxi         111.1667       37.3333           91       165     2012      05        09        130              0.125750      25.525055       0.000000       0.172372       0.052000   -9999.000000       0.047000       0.385000
53767     53767     shanxi         111.1667       37.3333           91       165     2012      05        10        131              0.125500      25.287598       1.641000       0.170690   -9999.000000   -9999.000000       0.052200       0.470000
53767     53767     shanxi         111.1667       37.3333           91       165     2012      05        11        132              0.119625      26.337067       0.912484       0.172086       0.086500   -9999.000000       0.063900       0.861000
53767     53767     shanxi         111.1667       37.3333           91       165     2012      05        12        133              0.118542      18.549652       0.000000       0.208743       0.068500       0.101800       0.057800       0.156000
53767     53767     shanxi         111.1667       37.3333           91       165     2012      05        13        134              0.117000      16.638367       0.029439       0.192653       0.068000       0.035000       0.042100   -9999.000000
53767     53767     shanxi         111.1667       37.3333           91       165     2012      05        14        135              0.117417      15.999695       0.073663       0.185510       0.064000   -9999.000000       0.065600       0.284000
53767     53767     shanxi         111.1667       37.3333           91       165     2012      05        15        136              0.116583      17.866333       0.000000       0.177592       0.074000       0.098500       0.053900       0.162000
53767     53767     shanxi         111.1667       37.3333           91       165     2012      05        16        137              0.115000      19.432068       0.000000       0.170988       0.068000   -9999.000000       0.058400       0.450000
53767     53767     shanxi         111.1667       37.3333           91       165     2012      05        17        138              0.115833      20.218475       0.000000       0.166923       0.070000       0.058700   -9999.000000       0.250000
53767     53767     shanxi         111.1667       37.3333           91       165     2012      05        18        139              0.115667      23.244995       0.044837       0.163859       0.071000       0.156500       0.058700   -9999.000000
53767     53767     shanxi         111.1667       37.3333           91       165     2012      05        19        140              0.114292      25.838379       0.090660       0.163158       0.061000   -9999.000000       0.055300       0.306000
53767     53767     shanxi         111.1667       37.3333           91       165     2012      05        20        141              0.111500      27.375214       0.560316       0.162157   -9999.000000       0.048500       0.068800       0.382000
53767     53767     shanxi         111.1667       37.3333           91       165     2012      05        21        142              0.108250      26.554474       2.104013       0.162277       0.112000   -9999.000000       0.067900       0.644000
53767     53767     shanxi         111.1667       37.3333           91       165     2012      05        22        143              0.120583      17.829620       0.000000       0.195501       0.082000   -9999.000000       0.056600       0.390000
53767     53767     shanxi         111.1667       37.3333           91       165     2012      05        23        144              0.120458      19.708954       0.069921       0.188745   -9999.000000       0.055300   -9999.000000   -9999.000000
53767     53767     shanxi         111.1667       37.3333           91       165     2012      05        24        145              0.117000      20.487640       0.134273       0.176391       0.084000   -9999.000000       0.052900       0.199000
53767     53767     shanxi         111.1667       37.3333           91       165     2012      05        25        146              0.000000      20.839233       0.000000       0.169437       0.080000       0.149000       0.066700       0.327000
53767     53767     shanxi         111.1667       37.3333           91       165     2012      05        26        147              0.114208      22.869843       0.000000       0.164070       0.082000   -9999.000000       0.051300       0.320000
53767     53767     shanxi         111.1667       37.3333           91       165     2012      05        27        148              0.113125      24.062439       0.000000       0.161116       0.078000   -9999.000000       0.055400       0.270000
53767     53767     shanxi         111.1667       37.3333           91       165     2012      05        28        149              0.143458      25.810394      27.605742       0.158740       0.057000       0.110500       0.055100       0.211000
53767     53767     shanxi         111.1667       37.3333           91       165     2012      05        29        150              0.225792      25.138550       0.183433       0.222019       0.082000   -9999.000000       0.077000       0.727000
53767     53767     shanxi         111.1667       37.3333           91       165     2012      05        30        151              0.189292      20.046509       0.609836       0.295789       0.065000       0.156500       0.053100   -9999.000000
53767     53767     shanxi         111.1667       37.3333           91       165     2012      05        31        152              0.171042      21.357269       0.135282       0.267923       0.107000       0.031400   -9999.000000   -9999.000000
53767     53767     shanxi         111.1667       37.3333           91       165     2012      06        01        153              0.162708      21.659760       0.205774       0.253135       0.090000   -9999.000000       0.058800   -9999.000000
53767     53767     shanxi         111.1667       37.3333           91       165     2012      06        02        154              0.156625      21.941010       1.589579       0.238913       0.088000   -9999.000000       0.057500       0.353000
53767     53767     shanxi         111.1667       37.3333           91       165     2012      06        03        155              0.159917      21.534332       0.092923       0.236444       0.076000   -9999.000000   -9999.000000       0.325000
53767     53767     shanxi         111.1667       37.3333           91       165     2012      06        04        156              0.165000      22.067444       0.000000       0.232126       0.066000   -9999.000000       0.088000       0.386000
53767     53767     shanxi         111.1667       37.3333           91       165     2012      06        05        157              0.165417      24.069214       0.554039       0.211830   -9999.000000       0.074000       0.093300       0.290000
53767     53767     shanxi         111.1667       37.3333           91       165     2012      06        06        158              0.160125      24.033661       0.604284       0.200801       0.083000   -9999.000000       0.097200   -9999.000000
53767     53767     shanxi         111.1667       37.3333           91       165     2012      06        07        159              0.161625      19.640472       4.613509       0.214766       0.091000   -9999.000000       0.076200       0.383000
53767     53767     shanxi         111.1667       37.3333           91       165     2012      06        08        160              0.161917      21.548920       0.000000       0.238396       0.091000   -9999.000000       0.092200       0.407000
53767     53767     shanxi         111.1667       37.3333           91       165     2012      06        09        161              0.167167      21.697479       0.830034       0.230415       0.065000       0.052500   -9999.000000       0.517000
53767     53767     shanxi         111.1667       37.3333           91       165     2012      06        10        162              0.165542      24.721436       0.000000       0.207179       0.077000       0.062000       0.077900       0.253000
53767     53767     shanxi         111.1667       37.3333           91       165     2012      06        11        163              0.000000      22.377838       0.000000       0.189756       0.077000   -9999.000000       0.101400   -9999.000000
53767     53767     shanxi         111.1667       37.3333           91       165     2012      06        12        164              0.163125      23.665009       0.000000       0.177514       0.069500       0.157400       0.081400       0.335000
53767     53767     shanxi         111.1667       37.3333           91       165     2012      06        13        165              0.162583      25.343079       1.145312       0.169839       0.072000       0.015200       0.086700       0.378000
53767     53767     shanxi         111.1667       37.3333           91       165     2012      06        14        166              0.159917      25.203949       0.000000       0.176697       0.071000   -9999.000000       0.088400       0.459000
53767     53767     shanxi         111.1667       37.3333           91       165     2012      06        15        167              0.158417      23.676361       0.000000       0.169650       0.067000       0.174800       0.096900       0.279000
53767     53767     shanxi         111.1667       37.3333           91       165     2012      06        16        168              0.159125      24.357513       0.000000       0.164372       0.077000   -9999.000000       0.080800   -9999.000000
53767     53767     shanxi         111.1667       37.3333           91       165     2012      06        17        169              0.157875      26.568878       0.000000       0.161146       0.073500   -9999.000000       0.093300       0.279000
53767     53767     shanxi         111.1667       37.3333           91       165     2012      06        18        170              0.157375      28.299103       0.000000       0.159255       0.072500       0.015100       0.096000       0.472000
53767     53767     shanxi         111.1667       37.3333           91       165     2012      06        19        171              0.152500      29.592621       0.454238       0.157938       0.066000   -9999.000000       0.104100       0.458000
53767     53767     shanxi         111.1667       37.3333           91       165     2012      06        20        172              0.151917      26.131042       0.499401       0.162316   -9999.000000       0.203700   -9999.000000       0.474000
53767     53767     shanxi         111.1667       37.3333           91       165     2012      06        21        173              0.149833      26.512421       1.072071       0.159962       0.084000   -9999.000000       0.102600   -9999.000000
53767     53767     shanxi         111.1667       37.3333           91       165     2012      06        22        174              0.152750      26.871460       9.838635       0.165838   -9999.000000       0.114800       0.128300       0.368000
53767     53767     shanxi         111.1667       37.3333           91       165     2012      06        23        175              0.177167      28.702087      25.938784       0.202828   -9999.000000       0.196700       0.104900   -9999.000000
53767     53767     shanxi         111.1667       37.3333           91       165     2012      06        24        176              0.253208      25.432037       1.171324       0.295573       0.123000   -9999.000000       0.125000       0.770000
53767     53767     shanxi         111.1667       37.3333           91       165     2012      06        25        177              0.228208      23.976562       0.000000       0.307401       0.100000   -9999.000000       0.104200       0.693000
53767     53767     shanxi         111.1667       37.3333           91       165     2012      06        26        178              0.209292      24.437897       0.000000       0.278448       0.090000   -9999.000000   -9999.000000       0.818000
53767     53767     shanxi         111.1667       37.3333           91       165     2012      06        27        179              0.204333      23.498322      14.064670       0.266218   -9999.000000   -9999.000000       0.106500       0.524000
53767     53767     shanxi         111.1667       37.3333           91       165     2012      06        28        180              0.275958      22.276672      37.673565       0.280701   -9999.000000       0.394400       0.108800   -9999.000000
53767     53767     shanxi         111.1667       37.3333           91       165     2012      06        29        181              0.257750      20.308807       6.593765       0.357413       0.128000   -9999.000000       0.113300       1.000000
53767     53767     shanxi         111.1667       37.3333           91       165     2012      06        30        182              0.219667      22.341644       0.000000       0.346085       0.097000       0.301000       0.102900   -9999.000000
53767     53767     shanxi         111.1667       37.3333           91       165     2012      07        01        183              0.201458      24.102112       0.000000       0.317432       0.100000       0.209400   -9999.000000       0.803000
53767     53767     shanxi         111.1667       37.3333           91       165     2012      07        02        184              0.191667      25.365295       0.918233       0.304214       0.097000   -9999.000000       0.117900       0.528000
53767     53767     shanxi         111.1667       37.3333           91       165     2012      07        03        185              0.185083      25.734772       1.935643       0.294038       0.087000       0.073800       0.105300       0.671000
53767     53767     shanxi         111.1667       37.3333           91       165     2012      07        04        186              0.177542      25.298676       0.173046       0.292060       0.087500   -9999.000000       0.107200       0.558000
53767     53767     shanxi         111.1667       37.3333           91       165     2012      07        05        187              0.176958      23.923920       0.000000       0.287705       0.090000   -9999.000000       0.096000   -9999.000000
53767     53767     shanxi         111.1667       37.3333           91       165     2012      07        06        188              0.173125      26.064545       0.209140       0.276591   -9999.000000       0.094100       0.097800       0.534000
53767     53767     shanxi         111.1667       37.3333           91       165     2012      07        07        189              0.168583      26.099060       0.687484       0.269895   -9999.000000   -9999.000000   -9999.000000       0.457000
53767     53767     shanxi         111.1667       37.3333           91       165     2012      07        08        190              0.193042      24.637299      17.541611       0.269103       0.134000       0.191900       0.115400       1.000000
53767     53767     shanxi         111.1667       37.3333           91       165     2012      07        09        191              0.215609      22.523193       2.517889       0.325292       0.113000   -9999.000000       0.128400       1.000000
53767     53767     shanxi         111.1667       37.3333           91       165     2012      07        10        192              0.206292      22.963348       0.142818       0.316755       0.090000       0.110300       0.112100   -9999.000000
53767     53767     shanxi         111.1667       37.3333           91       165     2012      07        11        193              0.193542      25.663208       0.000000       0.297270       0.082000       0.204900       0.110100       0.776000
53767     53767     shanxi         111.1667       37.3333           91       165     2012      07        12        194              0.185542      25.988342       0.000000       0.284099       0.100000   -9999.000000       0.109000       0.507000
53767     53767     shanxi         111.1667       37.3333           91       165     2012      07        13        195              0.178458      25.791656       7.055478       0.273156       0.115000   -9999.000000   -9999.000000       0.633000
53767     53767     shanxi         111.1667       37.3333           91       165     2012      07        14        196              0.175167      25.074310      25.364494       0.293655   -9999.000000   -9999.000000       0.125400       0.435000
53767     53767     shanxi         111.1667       37.3333           91       165     2012      07        15        197              0.200750      24.525452       1.717606       0.314313       0.114500   -9999.000000       0.132100   -9999.000000
53767     53767     shanxi         111.1667       37.3333           91       165     2012      07        16        198              0.191125      23.094543       0.000000       0.330249       0.092000       0.172200       0.139800       0.779000
53767     53767     shanxi         111.1667       37.3333           91       165     2012      07        17        199              0.178625      24.185974       0.000000       0.308092       0.101000       0.287100       0.144000       0.526000
53767     53767     shanxi         111.1667       37.3333           91       165     2012      07        18        200              0.169833      23.834778       0.000000       0.296631       0.124000       0.221100   -9999.000000       0.668000
53767     53767     shanxi         111.1667       37.3333           91       165     2012      07        19        201              0.165833      23.822693       0.000000       0.289716       0.085000       0.026500       0.131400       0.497000
53767     53767     shanxi         111.1667       37.3333           91       165     2012      07        20        202              0.161739      24.607697       2.517763       0.281999       0.100000       0.097600       0.140500   -9999.000000
53767     53767     shanxi         111.1667       37.3333           91       165     2012      07        21        203              0.215913      25.305786      23.769783       0.286373   -9999.000000       0.203100       0.159700       0.978000
53767     53767     shanxi         111.1667       37.3333           91       165     2012      07        22        204              0.218208      22.570923       3.058336       0.345035       0.138000   -9999.000000       0.142900   -9999.000000
53767     53767     shanxi         111.1667       37.3333           91       165     2012      07        23        205              0.197417      23.141907       0.040072       0.315431       0.149000   -9999.000000       0.093000       0.665000
53767     53767     shanxi         111.1667       37.3333           91       165     2012      07        24        206              0.202958      23.085693       7.060778       0.305912       0.131000       0.201600   -9999.000000       0.854000
53767     53767     shanxi         111.1667       37.3333           91       165     2012      07        25        207              0.201333      21.863953       1.621524       0.323219       0.132500   -9999.000000       0.090800       0.940000
53767     53767     shanxi         111.1667       37.3333           91       165     2012      07        26        208              0.212958      25.288635      24.286882       0.307789       0.142000   -9999.000000       0.097400       0.961000
53767     53767     shanxi         111.1667       37.3333           91       165     2012      07        27        209              0.216917      25.351929       6.364084       0.343921       0.124000   -9999.000000       0.093300   -9999.000000
53767     53767     shanxi         111.1667       37.3333           91       165     2012      07        28        210              0.213833      26.114471       0.497886       0.331190       0.132000       0.082700       0.096700       0.762000
53767     53767     shanxi         111.1667       37.3333           91       165     2012      07        29        211              0.199333      27.010742       2.981355       0.327942       0.130000       0.116800       0.092400   -9999.000000
53767     53767     shanxi         111.1667       37.3333           91       165     2012      07        30        212              0.250542      27.922516      59.821369       0.311371       0.178000   -9999.000000       0.172200       0.819000
53767     53767     shanxi         111.1667       37.3333           91       165     2012      07        31        213              0.251958      23.902557       2.380078       0.376396       0.151000       0.360400       0.136400       0.914000
53767     53767     shanxi         111.1667       37.3333           91       165     2012      08        01        214              0.227417      22.031464       0.963885       0.353759       0.156000   -9999.000000       0.166600       1.000000
53767     53767     shanxi         111.1667       37.3333           91       165     2012      08        02        215              0.210583      24.010986       0.296478       0.338031       0.128000   -9999.000000       0.142200       0.763000
53767     53767     shanxi         111.1667       37.3333           91       165     2012      08        03        216              0.196667      25.318817       0.000000       0.326541       0.157000       0.077800       0.140600   -9999.000000
53767     53767     shanxi         111.1667       37.3333           91       165     2012      08        04        217              0.185500      25.597260       0.000000       0.317309       0.128000   -9999.000000   -9999.000000       0.802000
53767     53767     shanxi         111.1667       37.3333           91       165     2012      08        05        218              0.175417      26.146301       0.591776       0.310269       0.117000       0.144000       0.134900       0.672000
53767     53767     shanxi         111.1667       37.3333           91       165     2012      08        06        219              0.171708      24.524170       0.000000       0.308492       0.116000   -9999.000000       0.114600       0.774000
53767     53767     shanxi         111.1667       37.3333           91       165     2012      08        07        220              0.166750      25.317413       0.000000       0.303120       0.110000   -9999.000000       0.105800       0.622000
53767     53767     shanxi         111.1667       37.3333           91       165     2012      08        08        221              0.180000      26.826996      13.218662       0.297050       0.151000       0.048000       0.117800   -9999.000000
53767     53767     shanxi         111.1667       37.3333           91       165     2012      08        09        222              0.201292      25.333649       0.000000       0.332101       0.135000   -9999.000000       0.116500       0.836000
53767     53767     shanxi         111.1667       37.3333           91       165     2012      08        10        223              0.188000      23.656158       0.000000       0.313457       0.121000       0.146900   -9999.000000       0.625000
53767     53767     shanxi         111.1667       37.3333           91       165     2012      08        11        224              0.184750      23.784332       6.909342       0.300573       0.148000       0.019700       0.117200       0.591000
53767     53767     shanxi         111.1667       37.3333           91       165     2012      08        12        225              0.208833      24.653320       3.017851       0.313095       0.144000       0.205300       0.123400       0.805000
53767     53767     shanxi         111.1667       37.3333           91       165     2012      08        13        226              0.201500      23.537659       1.143382       0.319933   -9999.000000   -9999.000000       0.095200   -9999.000000
53767     53767     shanxi         111.1667       37.3333           91       165     2012      08        14        227              0.210792      23.300873       7.899693       0.308325       0.179000   -9999.000000       0.113800       0.853000
53767     53767     shanxi         111.1667       37.3333           91       165     2012      08        15        228              0.203792      22.176727       0.000000       0.328465       0.136500   -9999.000000       0.098600       0.661000
53767     53767     shanxi         111.1667       37.3333           91       165     2012      08        16        229              0.191583      24.008972       1.117755       0.308720       0.129000       0.033700       0.117900       0.739000
53767     53767     shanxi         111.1667       37.3333           91       165     2012      08        17        230              0.250167      24.488342      36.419197       0.302026   -9999.000000   -9999.000000       0.099100       1.000000
53767     53767     shanxi         111.1667       37.3333           91       165     2012      08        18        231              0.245500      21.729126       2.857533       0.367302   -9999.000000       0.183000       0.122300   -9999.000000
53767     53767     shanxi         111.1667       37.3333           91       165     2012      08        19        232              0.223167      21.833618       0.000000       0.342061       0.172000   -9999.000000       0.104000       0.841000
53767     53767     shanxi         111.1667       37.3333           91       165     2012      08        20        233              0.208208      23.617188       1.046681       0.325216       0.158000       0.290200       0.143300   -9999.000000
53767     53767     shanxi         111.1667       37.3333           91       165     2012      08        21        234              0.192125      23.187378       0.000000       0.319924       0.140500       0.191100   -9999.000000       0.812000
53767     53767     shanxi         111.1667       37.3333           91       165     2012      08        22        235              0.179000      19.485992       0.000000       0.310010       0.174500   -9999.000000       0.130400   -9999.000000
53767     53767     shanxi         111.1667       37.3333           91       165     2012      08        23        236              0.168000      19.889038       0.000000       0.304050       0.130000       0.249500       0.130200       0.598000
53767     53767     shanxi         111.1667       37.3333           91       165     2012      08        24        237              0.159375      19.964600       0.000000       0.298405   -9999.000000   -9999.000000       0.137500       0.553000
53767     53767     shanxi         111.1667       37.3333           91       165     2012      08        25        238              0.000000      21.124878       2.188184       0.293535       0.162000       0.119300       0.127600   -9999.000000
53767     53767     shanxi         111.1667       37.3333           91       165     2012      08        26        239              0.150250      21.987671       2.124573       0.291388       0.160000       0.107100       0.135200       0.676000
53767     53767     shanxi         111.1667       37.3333           91       165     2012      08        27        240              0.147500      21.685547       5.088694       0.300486       0.162000   -9999.000000   -9999.000000   -9999.000000
53767     53767     shanxi         111.1667       37.3333           91       165     2012      08        28        241              0.150375      22.873383       1.498855       0.307960       0.134000       0.072400       0.115700       0.655000
53767     53767     shanxi         111.1667       37.3333           91       165     2012      08        29        242              0.142750      23.305908       0.000000       0.302971       0.115000       0.000700       0.138800       0.607000
53767     53767     shanxi         111.1667       37.3333           91       165     2012      08        30        243              0.133417      22.979584       0.000000       0.291574       0.146000       0.384900       0.114500       0.688000
53767     53767     shanxi         111.1667       37.3333           91       165     2012      08        31        244              0.125833      22.715973       6.328098       0.284608       0.157000       0.247000       0.123000       0.497000
53767     53767     shanxi         111.1667       37.3333           91       165     2012      09        01        245              0.204375      21.854156      35.460331       0.291186       0.191000   -9999.000000   -9999.000000   -9999.000000
53767     53767     shanxi         111.1667       37.3333           91       165     2012      09        02        246              0.229417      18.283844       0.000000       0.364270       0.184000       0.142500       0.150600       0.918000
53767     53767     shanxi         111.1667       37.3333           91       165     2012      09        03        247              0.210417      18.352631       0.000000       0.331086       0.148000       0.129100       0.129300       0.772000
53767     53767     shanxi         111.1667       37.3333           91       165     2012      09        04        248              0.194917      18.354767       0.196741       0.318633       0.173000       0.156700       0.146400       0.846000
53767     53767     shanxi         111.1667       37.3333           91       165     2012      09        05        249              0.185625      19.663910      17.002733       0.311303       0.173000   -9999.000000       0.135500       0.657000
53767     53767     shanxi         111.1667       37.3333           91       165     2012      09        06        250              0.260833      19.198608      20.508556       0.326769       0.183000   -9999.000000       0.147600   -9999.000000
53767     53767     shanxi         111.1667       37.3333           91       165     2012      09        07        251              0.231667      17.386810       0.000000       0.360968       0.193000   -9999.000000   -9999.000000       0.944000
53767     53767     shanxi         111.1667       37.3333           91       165     2012      09        08        252              0.212667      19.500305       0.340465       0.333298       0.172000       0.075300       0.129200       0.704000
53767     53767     shanxi         111.1667       37.3333           91       165     2012      09        09        253              0.197167      19.727264       0.206023       0.324530       0.167000       0.250900       0.153600       0.853000
53767     53767     shanxi         111.1667       37.3333           91       165     2012      09        10        254              0.190667      20.179321       1.875442       0.316364       0.191000       0.167300       0.136500       0.712000
53767     53767     shanxi         111.1667       37.3333           91       165     2012      09        11        255              0.190000      18.221680       4.028165       0.319631       0.141000   -9999.000000       0.113600   -9999.000000
53767     53767     shanxi         111.1667       37.3333           91       165     2012      09        12        256              0.183667      18.048248       0.000000       0.323255       0.155000       0.081200       0.128100       0.705000
53767     53767     shanxi         111.1667       37.3333           91       165     2012      09        13        257              0.176625      13.977570       0.000000       0.316063       0.134000       0.117700   -9999.000000       0.566000
53767     53767     shanxi         111.1667       37.3333           91       165     2012      09        14        258              0.169667      15.078217       0.000000       0.309892       0.124000   -9999.000000       0.112400       0.734000
53767     53767     shanxi         111.1667       37.3333           91       165     2012      09        15        259              0.162750      16.358337       0.000000       0.305396       0.149000       0.227200       0.127500       0.508000
53767     53767     shanxi         111.1667       37.3333           91       165     2012      09        16        260              0.154333      16.929474       0.000000       0.301498       0.138000       0.053700       0.113000   -9999.000000
53767     53767     shanxi         111.1667       37.3333           91       165     2012      09        17        261              0.148500      16.490051       0.107227       0.298804       0.116000   -9999.000000       0.120600       0.574000
53767     53767     shanxi         111.1667       37.3333           91       165     2012      09        18        262              0.143958      17.126099       1.415779       0.296836       0.148500       0.249400   -9999.000000       0.604000
53767     53767     shanxi         111.1667       37.3333           91       165     2012      09        19        263              0.138708      17.224548       0.163205       0.300225       0.122000   -9999.000000       0.114400       0.526000
53767     53767     shanxi         111.1667       37.3333           91       165     2012      09        20        264              0.136000      18.068787       6.473334       0.294122   -9999.000000   -9999.000000       0.139400       0.513000
53767     53767     shanxi         111.1667       37.3333           91       165     2012      09        21        265              0.139208      17.906464       1.021292       0.301875   -9999.000000       0.175600       0.149300       0.841000
53767     53767     shanxi         111.1667       37.3333           91       165     2012      09        22        266              0.142083      16.190552       0.000000       0.315136       0.125500   -9999.000000       0.122100       0.657000
53767     53767     shanxi         111.1667       37.3333           91       165     2012      09        23        267              0.139000      17.726807       0.000000       0.303089       0.126500   -9999.000000       0.129100   -9999.000000
53767     53767     shanxi         111.1667       37.3333           91       165     2012      09        24        268              0.136250      18.302338       1.406518       0.297414       0.124000   -9999.000000   -9999.000000       0.545000
53767     53767     shanxi         111.1667       37.3333           91       165     2012      09        25        269              0.164292      18.088318      21.338596       0.297855   -9999.000000       0.161900       0.132000   -9999.000000
53767     53767     shanxi         111.1667       37.3333           91       165     2012      09        26        270              0.190208      15.177948       0.000000       0.347780       0.158000       0.187300       0.143300       0.902000
53767     53767     shanxi         111.1667       37.3333           91       165     2012      09        27        271              0.183143      17.410065       0.000000       0.322792       0.160000   -9999.000000       0.127200       0.679000
53767     53767     shanxi         111.1667       37.3333           91       165     2012      09        28        272              0.167333      14.393463       0.000000       0.311939       0.135000   -9999.000000       0.142700       0.762000
53767     53767     shanxi         111.1667       37.3333           91       165     2012      09        29        273              0.161750      12.524963       0.000000       0.306893       0.135000   -9999.000000       0.134200       0.479000
53767     53767     shanxi         111.1667       37.3333           91       165     2012      09        30        274              0.155917      12.662018       0.000000       0.303206       0.126000   -9999.000000       0.152400   -9999.000000
53767     53767     shanxi         111.1667       37.3333           91       165     2012      10        01        275              0.150083      13.019867       0.000000       0.299896       0.118000   -9999.000000       0.096700       0.598000
53767     53767     shanxi         111.1667       37.3333           91       165     2012      10        02        276              0.145917      14.813782       0.000000       0.296952       0.116000   -9999.000000       0.120800       0.568000
53767     53767     shanxi         111.1667       37.3333           91       165     2012      10        03        277              0.140917      16.196747       0.000000       0.294996       0.102000       0.217900       0.107000       0.721000
53767     53767     shanxi         111.1667       37.3333           91       165     2012      10        04        278              0.137083      16.065338       1.925223       0.291909       0.121000       0.081300       0.128300       0.787000
53767     53767     shanxi         111.1667       37.3333           91       165     2012      10        05        279              0.135375      13.253998       0.097813       0.299859       0.113000       0.146000   -9999.000000   -9999.000000
53767     53767     shanxi         111.1667       37.3333           91       165     2012      10        06        280              0.134125      12.993988       0.000000       0.295791       0.113000       0.103200       0.118700       0.632000
53767     53767     shanxi         111.1667       37.3333           91       165     2012      10        07        281              0.132917      14.262115       0.130882       0.291375       0.119000   -9999.000000       0.116100       0.563000
53767     53767     shanxi         111.1667       37.3333           91       165     2012      10        08        282              0.135000      13.482849       0.472148       0.290872       0.116500       0.136000       0.128100       0.697000
53767     53767     shanxi         111.1667       37.3333           91       165     2012      10        09        283              0.134667      14.265381       0.052023       0.292028       0.106000       0.038200       0.104600       0.460000
53767     53767     shanxi         111.1667       37.3333           91       165     2012      10        10        284              0.136167      12.000763       0.000000       0.288269       0.106000       0.168200       0.115900   -9999.000000
53767     53767     shanxi         111.1667       37.3333           91       165     2012      10        11        285              0.137375      12.528839       0.123594       0.285485       0.094000       0.107500   -9999.000000       0.512000
53767     53767     shanxi         111.1667       37.3333           91       165     2012      10        12        286              0.136542      14.069366       0.124757       0.283984       0.098000   -9999.000000       0.100400       0.496000
53767     53767     shanxi         111.1667       37.3333           91       165     2012      10        13        287              0.135542      13.566406       0.000000       0.282313       0.100000       0.192400       0.117000       0.613000
53767     53767     shanxi         111.1667       37.3333           91       165     2012      10        14        288              0.134042      13.176910       0.129817       0.280005       0.092500       0.049500       0.102800       0.614000
53767     53767     shanxi         111.1667       37.3333           91       165     2012      10        15        289              0.131083      13.931641       3.562876       0.279733       0.106000   -9999.000000       0.103600   -9999.000000
53767     53767     shanxi         111.1667       37.3333           91       165     2012      10        16        290              0.132167      12.065613       0.175792       0.289274       0.104000   -9999.000000       0.110800       0.565000
53767     53767     shanxi         111.1667       37.3333           91       165     2012      10        17        291              0.134458       8.579498       0.126749       0.292005   -9999.000000   -9999.000000       0.118800   -9999.000000
53767     53767     shanxi         111.1667       37.3333           91       165     2012      10        18        292              0.134875       8.535126       0.063367       0.286213   -9999.000000       0.133300       0.086500       0.480000
53767     53767     shanxi         111.1667       37.3333           91       165     2012      10        19        293              0.136750       8.942139       0.000000       0.285095       0.098000       0.144600       0.115900       0.442000
53767     53767     shanxi         111.1667       37.3333           91       165     2012      10        20        294              0.138792      10.663727       0.398776       0.282804       0.097500   -9999.000000       0.095700       0.469000
53767     53767     shanxi         111.1667       37.3333           91       165     2012      10        21        295              0.147000      12.988617      10.029943       0.281666       0.109000       0.167700       0.113300       0.725000
53767     53767     shanxi         111.1667       37.3333           91       165     2012      10        22        296              0.163958       7.136261       0.338353       0.318859   -9999.000000       0.061400   -9999.000000   -9999.000000
53767     53767     shanxi         111.1667       37.3333           91       165     2012      10        23        297              0.160667       7.236420       0.318069       0.303379   -9999.000000   -9999.000000       0.089200       0.648000
53767     53767     shanxi         111.1667       37.3333           91       165     2012      10        24        298              0.160083       7.617157       0.000000       0.299132   -9999.000000       0.284500       0.083700   -9999.000000
53767     53767     shanxi         111.1667       37.3333           91       165     2012      10        25        299              0.000000       8.695679       0.000000       0.294947       0.090500   -9999.000000       0.089600       0.616000
53767     53767     shanxi         111.1667       37.3333           91       165     2012      10        26        300              0.153167       9.764557       0.237168       0.291876       0.105000       0.140100       0.084900       0.624000
53767     53767     shanxi         111.1667       37.3333           91       165     2012      10        27        301              0.152958       7.768188       0.000000       0.293623       0.092000       0.019100       0.093000       0.684000
53767     53767     shanxi         111.1667       37.3333           91       165     2012      10        28        302              0.000000       8.698669       0.376217       0.291099       0.101000       0.238500   -9999.000000       0.602000
53767     53767     shanxi         111.1667       37.3333           91       165     2012      10        29        303              0.148542      10.719299       0.000000       0.289566   -9999.000000       0.200400       0.063400   -9999.000000
53767     53767     shanxi         111.1667       37.3333           91       165     2012      10        30        304              0.144667       8.150574       0.000000       0.286252       0.080000   -9999.000000       0.083500       0.458000
53767     53767     shanxi         111.1667       37.3333           91       165     2012      10        31        305              0.144083       5.821289       0.000000       0.284982       0.089000       0.226000       0.068000       0.451000
53767     53767     shanxi         111.1667       37.3333           91       165     2012      11        01        306              0.143292       5.901581       0.000000       0.282030       0.082000       0.061000       0.080200       0.608000
53767     53767     shanxi         111.1667       37.3333           91       165     2012      11        02        307              0.145083       7.058350       4.188586       0.283522       0.087000   -9999.000000   -9999.000000       0.503000
53767     53767     shanxi         111.1667       37.3333           91       165     2012      11        03        308              0.172000       9.354858       0.534779       0.287784   -9999.000000   -9999.000000       0.064600   -9999.000000
53767     53767     shanxi         111.1667       37.3333           91       165     2012      11        04        309              0.175250       1.297333       5.185594       0.249492   -9999.000000   -9999.000000       0.052400       0.665000
53767     53767     shanxi         111.1667       37.3333           91       165     2012      11        05        310              0.170375      -1.347565       0.656839       0.182314       0.084000   -9999.000000       0.060200       0.533000
53767     53767     shanxi         111.1667       37.3333           91       165     2012      11        06        311              0.183083      -0.032776       0.224667       0.212416       0.106000       0.089600       0.074700       0.699000
53767     53767     shanxi         111.1667       37.3333           91       165     2012      11        07        312              0.187625       2.216278       0.041406       0.260509       0.102000   -9999.000000       0.075700       0.590000
53767     53767     shanxi         111.1667       37.3333           91       165     2012      11        08        313              0.183833       2.138245       0.000000       0.264692   -9999.000000       0.109000   -9999.000000   -9999.000000
53767     53767     shanxi         111.1667       37.3333           91       165     2012      11        09        314              0.186667       4.230896       1.327138       0.283712       0.109000   -9999.000000       0.066600       0.790000
53767     53767     shanxi         111.1667       37.3333           91       165     2012      11        10        315              0.200125       3.715576       0.600043       0.293171   -9999.000000   -9999.000000       0.064000       0.538000
53767     53767     shanxi         111.1667       37.3333           91       165     2012      11        11        316              0.180792       1.082733       0.215911       0.247839       0.096000       0.082300       0.061800       0.580000
53767     53767     shanxi         111.1667       37.3333           91       165     2012      11        12        317              0.166417       0.049286       0.000000       0.213670       0.100000   -9999.000000       0.067900       0.456000
53767     53767     shanxi         111.1667       37.3333           91       165     2012      11        13        318              0.000000       1.197693       0.000000       0.239816   -9999.000000       0.168000       0.065100   -9999.000000
53767     53767     shanxi         111.1667       37.3333           91       165     2012      11        14        319              0.137958       0.927948       0.000000       0.231564   -9999.000000       0.046600   -9999.000000       0.489000
53767     53767     shanxi         111.1667       37.3333           91       165     2012      11        15        320              0.158583       2.288727       0.412985       0.255674   -9999.000000   -9999.000000       0.045100   -9999.000000
53767     53767     shanxi         111.1667       37.3333           91       165     2012      11        16        321              0.160750       0.955444       2.239529       0.248332       0.084000   -9999.000000       0.053800       0.443000
53767     53767     shanxi         111.1667       37.3333           91       165     2012      11        17        322              0.000000       0.547729       0.000000       0.226267       0.104000   -9999.000000       0.064800       0.497000
53767     53767     shanxi         111.1667       37.3333           91       165     2012      11        18        323              0.184583       2.230957       0.000000       0.254150       0.096000   -9999.000000       0.065300       0.640000
53767     53767     shanxi         111.1667       37.3333           91       165     2012      11        19        324              0.175292       2.197723       0.000000       0.253421   -9999.000000       0.026700   -9999.000000       0.519000
53767     53767     shanxi         111.1667       37.3333           91       165     2012      11        20        325              0.179542       2.484955       0.273813       0.263415   -9999.000000   -9999.000000       0.067000   -9999.000000
53767     53767     shanxi         111.1667       37.3333           91       165     2012      11        21        326              0.189125       2.683502       0.000000       0.280903       0.088000   -9999.000000       0.056000       0.568000
53767     53767     shanxi         111.1667       37.3333           91       165     2012      11        22        327              0.178917       4.329041       0.000000       0.285953   -9999.000000   -9999.000000       0.055800   -9999.000000
53767     53767     shanxi         111.1667       37.3333           91       165     2012      11        23        328              0.154333       1.427490       0.000000       0.257337   -9999.000000       0.067500       0.053900       0.571000
53767     53767     shanxi         111.1667       37.3333           91       165     2012      11        24        329              0.110917      -0.070343       0.000000       0.216457   -9999.000000       0.038000       0.060700       0.399000
53767     53767     shanxi         111.1667       37.3333           91       165     2012      11        25        330              0.111500       1.104156       0.000000       0.232494   -9999.000000   -9999.000000   -9999.000000       0.427000
53767     53767     shanxi         111.1667       37.3333           91       165     2012      11        26        331              0.066625      -0.040833       0.000000       0.215039       0.074000   -9999.000000   -9999.000000       0.239000
53767     53767     shanxi         111.1667       37.3333           91       165     2012      11        27        332              0.058375      -0.162415       0.000000       0.205964       0.081000   -9999.000000       0.049500   -9999.000000
53767     53767     shanxi         111.1667       37.3333           91       165     2012      11        28        333              0.046333       0.471954       0.000000       0.221097   -9999.000000       0.157600       0.043600       0.335000
53767     53767     shanxi         111.1667       37.3333           91       165     2012      11        29        334              0.041458      -2.323395       0.000000       0.176423       0.074000   -9999.000000       0.047400       0.133000
53767     53767     shanxi         111.1667       37.3333           91       165     2012      11        30        335              0.046583      -1.769409       0.041173       0.186062   -9999.000000   -9999.000000       0.049800       0.358000
53767     53767     shanxi         111.1667       37.3333           91       165     2012      12        01        336              0.046000       0.173859       0.707192       0.206144   -9999.000000   -9999.000000       0.054400       0.316000
53767     53767     shanxi         111.1667       37.3333           91       165     2012      12        02        337              0.042458      -1.224274       0.000000       0.190019   -9999.000000       0.067500       0.036600   -9999.000000
53767     53767     shanxi         111.1667       37.3333           91       165     2012      12        03        338              0.036917      -0.968079       0.000000       0.190021       0.075000   -9999.000000       0.051500       0.288000
53767     53767     shanxi         111.1667       37.3333           91       165     2012      12        04        339              0.039292      -3.073669       0.000000       0.166177       0.078000   -9999.000000       0.045800       0.145000
53767     53767     shanxi         111.1667       37.3333           91       165     2012      12        05        340              0.034750      -0.955597       0.000000       0.196298   -9999.000000   -9999.000000       0.048000       0.216000
53767     53767     shanxi         111.1667       37.3333           91       165     2012      12        06        341              0.036458      -3.703949       2.350411       0.160221   -9999.000000   -9999.000000   -9999.000000       0.112000
53767     53767     shanxi         111.1667       37.3333           91       165     2012      12        07        342              0.036458      -1.550110       0.000000       0.185157       0.071000   -9999.000000       0.042100   -9999.000000
53767     53767     shanxi         111.1667       37.3333           91       165     2012      12        08        343              0.030708      -3.136810       0.379730       0.165809   -9999.000000   -9999.000000       0.043500       0.047000
53767     53767     shanxi         111.1667       37.3333           91       165     2012      12        09        344              0.031917      -6.154236       0.000000       0.140887       0.074000   -9999.000000       0.049500       0.076000
53767     53767     shanxi         111.1667       37.3333           91       165     2012      12        10        345              0.033375      -3.539154       0.000000       0.160439   -9999.000000   -9999.000000       0.043400       0.234000
53767     53767     shanxi         111.1667       37.3333           91       165     2012      12        11        346              0.034000      -3.029907       0.000000       0.172310   -9999.000000   -9999.000000       0.043000       0.066000
53767     53767     shanxi         111.1667       37.3333           91       165     2012      12        12        347              0.037292      -1.804840       0.141453       0.181247       0.061000   -9999.000000   -9999.000000   -9999.000000
53767     53767     shanxi         111.1667       37.3333           91       165     2012      12        13        348              0.038250      -0.646027       0.438917       0.193561   -9999.000000   -9999.000000       0.038700       0.093000
53767     53767     shanxi         111.1667       37.3333           91       165     2012      12        14        349              0.040083      -1.197479      11.804047       0.178427   -9999.000000   -9999.000000       0.044100   -9999.000000
53767     53767     shanxi         111.1667       37.3333           91       165     2012      12        15        350              0.000000      -1.000854       0.183990       0.191740   -9999.000000   -9999.000000       0.041800       0.158000
53767     53767     shanxi         111.1667       37.3333           91       165     2012      12        16        351              0.044042      -0.272156       0.000000       0.195373   -9999.000000   -9999.000000       0.049000       0.208000
53767     53767     shanxi         111.1667       37.3333           91       165     2012      12        17        352              0.039292      -0.434601       0.000000       0.194764   -9999.000000       0.041400   -9999.000000       0.199000
53767     53767     shanxi         111.1667       37.3333           91       165     2012      12        18        353              0.035167      -3.138885       0.000000       0.171407       0.066000       0.090800       0.046100       0.023000
53767     53767     shanxi         111.1667       37.3333           91       165     2012      12        19        354              0.035333      -2.913116       1.082485       0.165812   -9999.000000       0.081100       0.038900   -9999.000000
53767     53767     shanxi         111.1667       37.3333           91       165     2012      12        20        355              0.000000      -1.911133       0.233767       0.168062   -9999.000000   -9999.000000       0.044100       0.090000
53767     53767     shanxi         111.1667       37.3333           91       165     2012      12        21        356              0.032875      -2.947845       0.700795       0.159623   -9999.000000   -9999.000000       0.036700   -9999.000000
53767     53767     shanxi         111.1667       37.3333           91       165     2012      12        22        357              0.026125      -6.600189       0.307759       0.139728   -9999.000000   -9999.000000       0.038000       0.108000
53767     53767     shanxi         111.1667       37.3333           91       165     2012      12        23        358              0.023542      -9.850067       0.000000       0.132799   -9999.000000   -9999.000000   -9999.000000       0.058000
53767     53767     shanxi         111.1667       37.3333           91       165     2012      12        24        359              0.023800      -9.913452       0.000000       0.129416   -9999.000000   -9999.000000       0.037100       0.176000
53767     53767     shanxi         111.1667       37.3333           91       165     2012      12        25        360              0.025375      -7.908844       0.000000       0.131133   -9999.000000   -9999.000000       0.045900       0.069000
53767     53767     shanxi         111.1667       37.3333           91       165     2012      12        26        361              0.000000      -6.985138       0.000000       0.131014   -9999.000000   -9999.000000       0.038300   -9999.000000
53767     53767     shanxi         111.1667       37.3333           91       165     2012      12        27        362              0.028500      -5.425262       0.000000       0.138013   -9999.000000   -9999.000000       0.041600       0.106000
53767     53767     shanxi         111.1667       37.3333           91       165     2012      12        28        363              0.027000      -4.052368       0.053963       0.154680   -9999.000000   -9999.000000       0.039700       0.002000
53767     53767     shanxi         111.1667       37.3333           91       165     2012      12        29        364              0.000000      -6.491913       0.000000       0.137717   -9999.000000   -9999.000000   -9999.000000       0.176000
53767     53767     shanxi         111.1667       37.3333           91       165     2012      12        30        365              0.000000     -10.036835       0.000000       0.131921   -9999.000000   -9999.000000       0.031500       0.093000
53767     53767     shanxi         111.1667       37.3333           91       165     2012      12        31        366              0.025467      -8.763947       0.000000       0.130164   -9999.000000   -9999.000000       0.043900   -9999.000000
