# Supplementary material for: Research on Fusing Multisatellite Soil Moisture Data Based on Bayesian Model Averaging
Source: Hindawi journal article supplement (doi:10.1155/2018/9310838), 2018-06-25
Supplement: f1 [file 9310838.f1.zip › 2012_sm00-10cm_daily_ZDB_ZHY_53776_366days_allin.txt]

53776     53776     shanxi         112.7631       37.6897           89       171     2012      01        01        001              0.000000   -9999.000000       0.000000   -9999.000000   -9999.000000   -9999.000000       0.028600   -9999.000000
53776     53776     shanxi         112.7631       37.6897           89       171     2012      01        02        002              0.069167      -2.722290       0.000000       0.186494   -9999.000000       0.099200       0.037600       0.435000
53776     53776     shanxi         112.7631       37.6897           89       171     2012      01        03        003              0.000000      -4.043243       0.000000       0.178940   -9999.000000       0.039900   -9999.000000       0.458000
53776     53776     shanxi         112.7631       37.6897           89       171     2012      01        04        004              0.062958      -6.532471       0.000000       0.158061   -9999.000000   -9999.000000       0.014100   -9999.000000
53776     53776     shanxi         112.7631       37.6897           89       171     2012      01        05        005              0.062500      -6.782104       0.000000       0.157499   -9999.000000   -9999.000000       0.035600       0.181000
53776     53776     shanxi         112.7631       37.6897           89       171     2012      01        06        006              0.063792      -5.875061       0.000000       0.162774   -9999.000000   -9999.000000       0.030700       0.552000
53776     53776     shanxi         112.7631       37.6897           89       171     2012      01        07        007              0.065458      -4.388519       0.000000       0.171505   -9999.000000       0.132700       0.029300       0.403000
53776     53776     shanxi         112.7631       37.6897           89       171     2012      01        08        008              0.000000      -3.942810       0.000000       0.169960   -9999.000000   -9999.000000       0.040000       0.223000
53776     53776     shanxi         112.7631       37.6897           89       171     2012      01        09        009              0.065833      -3.569946       0.000000       0.180111   -9999.000000   -9999.000000   -9999.000000   -9999.000000
53776     53776     shanxi         112.7631       37.6897           89       171     2012      01        10        010              0.065167      -2.899475       0.000000       0.184526   -9999.000000   -9999.000000       0.010000       0.252000
53776     53776     shanxi         112.7631       37.6897           89       171     2012      01        11        011              0.064375      -2.903351       0.000000       0.187170   -9999.000000   -9999.000000       0.038300       0.235000
53776     53776     shanxi         112.7631       37.6897           89       171     2012      01        12        012              0.063917      -4.294952       0.000000       0.176456   -9999.000000       0.182900       0.033400       0.530000
53776     53776     shanxi         112.7631       37.6897           89       171     2012      01        13        013              0.064042      -3.465393       0.000000       0.181947   -9999.000000   -9999.000000       0.040900       0.261000
53776     53776     shanxi         112.7631       37.6897           89       171     2012      01        14        014              0.065042      -2.892456       0.000000       0.186239   -9999.000000   -9999.000000   -9999.000000       0.040000
53776     53776     shanxi         112.7631       37.6897           89       171     2012      01        15        015              0.064917      -2.500977       0.000000       0.189070   -9999.000000       0.068000       0.035900       0.409000
53776     53776     shanxi         112.7631       37.6897           89       171     2012      01        16        016              0.064792      -2.783936       0.000000       0.187552   -9999.000000   -9999.000000       0.025200       0.373000
53776     53776     shanxi         112.7631       37.6897           89       171     2012      01        17        017              0.000000      -3.887604       0.000000       0.173455   -9999.000000   -9999.000000       0.036700       0.079000
53776     53776     shanxi         112.7631       37.6897           89       171     2012      01        18        018              0.067000      -2.297607       0.000000       0.189274   -9999.000000       0.068400       0.031500   -9999.000000
53776     53776     shanxi         112.7631       37.6897           89       171     2012      01        19        019              0.068500      -1.675293       0.000000       0.197620   -9999.000000   -9999.000000       0.039800       0.174000
53776     53776     shanxi         112.7631       37.6897           89       171     2012      01        20        020              0.068875      -1.102081       0.000000       0.200249   -9999.000000   -9999.000000   -9999.000000       0.456000
53776     53776     shanxi         112.7631       37.6897           89       171     2012      01        21        021              0.066375      -4.155823       0.000000       0.173564   -9999.000000   -9999.000000       0.018700       0.340000
53776     53776     shanxi         112.7631       37.6897           89       171     2012      01        22        022              0.064333      -6.945465       0.000000       0.157636   -9999.000000   -9999.000000       0.034200       0.607000
53776     53776     shanxi         112.7631       37.6897           89       171     2012      01        23        023              0.062375      -7.838989       0.000000       0.152226   -9999.000000   -9999.000000       0.034600   -9999.000000
53776     53776     shanxi         112.7631       37.6897           89       171     2012      01        24        024              0.061583      -7.478180       0.000000       0.153378   -9999.000000   -9999.000000   -9999.000000       0.457000
53776     53776     shanxi         112.7631       37.6897           89       171     2012      01        25        025              0.061208      -7.156342       0.000000       0.154335   -9999.000000   -9999.000000       0.037100       0.598000
53776     53776     shanxi         112.7631       37.6897           89       171     2012      01        26        026              0.062375      -5.748413       0.000000       0.161398   -9999.000000   -9999.000000       0.037000       0.464000
53776     53776     shanxi         112.7631       37.6897           89       171     2012      01        27        027              0.063958      -3.268982       0.000000       0.182888   -9999.000000       0.097900       0.013700       0.490000
53776     53776     shanxi         112.7631       37.6897           89       171     2012      01        28        028              0.065625      -1.790894       0.000000       0.195821   -9999.000000   -9999.000000       0.043300   -9999.000000
53776     53776     shanxi         112.7631       37.6897           89       171     2012      01        29        029              0.066292      -1.002411       0.000000       0.203466   -9999.000000   -9999.000000       0.038400       0.309000
53776     53776     shanxi         112.7631       37.6897           89       171     2012      01        30        030              0.066125      -1.983307       0.000000       0.195147   -9999.000000       0.085700       0.046900       0.578000
53776     53776     shanxi         112.7631       37.6897           89       171     2012      01        31        031              0.067917      -1.421509       0.000000       0.197435   -9999.000000       0.092200   -9999.000000       0.327000
53776     53776     shanxi         112.7631       37.6897           89       171     2012      02        01        032              0.065083      -0.410614       0.000000       0.208307   -9999.000000   -9999.000000       0.038300       0.405000
53776     53776     shanxi         112.7631       37.6897           89       171     2012      02        02        033              0.062917      -3.849426       0.000000       0.182065   -9999.000000   -9999.000000       0.033300   -9999.000000
53776     53776     shanxi         112.7631       37.6897           89       171     2012      02        03        034              0.064042      -4.329712       0.000000       0.175416   -9999.000000   -9999.000000       0.043500       0.251000
53776     53776     shanxi         112.7631       37.6897           89       171     2012      02        04        035              0.065292      -2.261444       0.000000       0.189349   -9999.000000       0.200800       0.039800       0.408000
53776     53776     shanxi         112.7631       37.6897           89       171     2012      02        05        036              0.068333      -1.381744       0.000000       0.195125   -9999.000000   -9999.000000       0.050100       0.305000
53776     53776     shanxi         112.7631       37.6897           89       171     2012      02        06        037              0.066333       0.398804       0.000000       0.212260   -9999.000000   -9999.000000   -9999.000000       0.173000
53776     53776     shanxi         112.7631       37.6897           89       171     2012      02        07        038              0.063167      -4.303284       0.000000       0.182789   -9999.000000   -9999.000000       0.016300   -9999.000000
53776     53776     shanxi         112.7631       37.6897           89       171     2012      02        08        039              0.062458      -5.611481       0.000000       0.165927   -9999.000000   -9999.000000       0.044900       0.466000
53776     53776     shanxi         112.7631       37.6897           89       171     2012      02        09        040              0.062833      -4.948761       0.000000       0.170526   -9999.000000       0.084100       0.038100       0.372000
53776     53776     shanxi         112.7631       37.6897           89       171     2012      02        10        041              0.063000      -4.634247       0.000000       0.169044   -9999.000000   -9999.000000       0.045800       0.640000
53776     53776     shanxi         112.7631       37.6897           89       171     2012      02        11        042              0.064708      -3.220673       0.000000       0.183810   -9999.000000   -9999.000000       0.050800       0.385000
53776     53776     shanxi         112.7631       37.6897           89       171     2012      02        12        043              0.067500      -0.599335       0.000000       0.200523   -9999.000000   -9999.000000   -9999.000000       0.208000
53776     53776     shanxi         112.7631       37.6897           89       171     2012      02        13        044              0.069083      -0.956665       0.000000       0.201538   -9999.000000   -9999.000000   -9999.000000       0.564000
53776     53776     shanxi         112.7631       37.6897           89       171     2012      02        14        045              0.071167       0.148773       0.000000       0.210898   -9999.000000   -9999.000000       0.048500       0.150000
53776     53776     shanxi         112.7631       37.6897           89       171     2012      02        15        046              0.072375       0.441772       0.000000       0.214397   -9999.000000   -9999.000000       0.039200       0.147000
53776     53776     shanxi         112.7631       37.6897           89       171     2012      02        16        047              0.068833       0.292114       1.357417       0.213079   -9999.000000   -9999.000000       0.047900   -9999.000000
53776     53776     shanxi         112.7631       37.6897           89       171     2012      02        17        048              0.066458      -1.969330       0.000000       0.193805   -9999.000000       0.174000   -9999.000000       0.437000
53776     53776     shanxi         112.7631       37.6897           89       171     2012      02        18        049              0.065458      -2.935455       1.327223       0.186192   -9999.000000   -9999.000000       0.035700       0.316000
53776     53776     shanxi         112.7631       37.6897           89       171     2012      02        19        050              0.065708      -2.782013       0.790561       0.192210   -9999.000000   -9999.000000       0.036000       0.235000
53776     53776     shanxi         112.7631       37.6897           89       171     2012      02        20        051              0.070833      -0.873810       0.000000       0.200233   -9999.000000   -9999.000000       0.044800       0.768000
53776     53776     shanxi         112.7631       37.6897           89       171     2012      02        21        052              0.076333       1.993256       0.000000       0.220532   -9999.000000       0.049300   -9999.000000   -9999.000000
53776     53776     shanxi         112.7631       37.6897           89       171     2012      02        22        053              0.082667       3.510040       0.000000       0.231024   -9999.000000   -9999.000000       0.058300       0.386000
53776     53776     shanxi         112.7631       37.6897           89       171     2012      02        23        054              0.085609       4.365631       0.000000       0.233812   -9999.000000       0.019400   -9999.000000       0.413000
53776     53776     shanxi         112.7631       37.6897           89       171     2012      02        24        055              0.085833       2.360840       0.000000       0.223457   -9999.000000   -9999.000000       0.015300       0.603000
53776     53776     shanxi         112.7631       37.6897           89       171     2012      02        25        056              0.083333       0.861115       0.000000       0.216497   -9999.000000   -9999.000000       0.045900       0.658000
53776     53776     shanxi         112.7631       37.6897           89       171     2012      02        26        057              0.082333      -0.718903       0.092684       0.201219   -9999.000000       0.066500       0.043900   -9999.000000
53776     53776     shanxi         112.7631       37.6897           89       171     2012      02        27        058              0.084625       0.692230       3.746796       0.210344   -9999.000000   -9999.000000   -9999.000000       0.387000
53776     53776     shanxi         112.7631       37.6897           89       171     2012      02        28        059              0.090833       2.232574       0.000000       0.220459   -9999.000000   -9999.000000       0.055900       0.698000
53776     53776     shanxi         112.7631       37.6897           89       171     2012      02        29        060              0.000000   -9999.000000       0.000000   -9999.000000   -9999.000000   -9999.000000   -9999.000000   -9999.000000
53776     53776     shanxi         112.7631       37.6897           89       171     2012      03        01        061              0.102083       3.304077       0.000000       0.228151   -9999.000000   -9999.000000       0.019000       0.827000
53776     53776     shanxi         112.7631       37.6897           89       171     2012      03        02        062              0.106292       1.833221       0.000000       0.227572   -9999.000000   -9999.000000       0.048000   -9999.000000
53776     53776     shanxi         112.7631       37.6897           89       171     2012      03        03        063              0.109000       2.039032       0.000000       0.226646   -9999.000000   -9999.000000       0.041100       0.614000
53776     53776     shanxi         112.7631       37.6897           89       171     2012      03        04        064              0.110500       0.310211       0.000000       0.210666   -9999.000000       0.139600       0.062300       0.821000
53776     53776     shanxi         112.7631       37.6897           89       171     2012      03        05        065              0.116250       2.077545       0.000000       0.222252   -9999.000000   -9999.000000   -9999.000000       0.471000
53776     53776     shanxi         112.7631       37.6897           89       171     2012      03        06        066              0.110750       2.290924       0.293655       0.221724   -9999.000000   -9999.000000       0.036800       0.498000
53776     53776     shanxi         112.7631       37.6897           89       171     2012      03        07        067              0.000000       1.954620       0.000000       0.217021   -9999.000000       0.079600       0.042100   -9999.000000
53776     53776     shanxi         112.7631       37.6897           89       171     2012      03        08        068              0.117333       4.028778       0.000000       0.225974   -9999.000000   -9999.000000       0.054900       0.578000
53776     53776     shanxi         112.7631       37.6897           89       171     2012      03        09        069              0.123875       2.713013       0.000000       0.222333   -9999.000000   -9999.000000       0.050000       0.561000
53776     53776     shanxi         112.7631       37.6897           89       171     2012      03        10        070              0.133792       3.896179       0.000000       0.229592   -9999.000000       0.028900       0.058200       0.771000
53776     53776     shanxi         112.7631       37.6897           89       171     2012      03        11        071              0.134625       4.161560       0.000000       0.220658   -9999.000000   -9999.000000   -9999.000000       0.028000
53776     53776     shanxi         112.7631       37.6897           89       171     2012      03        12        072              0.146042       3.274445       0.000000       0.215723   -9999.000000   -9999.000000       0.010000       0.326000
53776     53776     shanxi         112.7631       37.6897           89       171     2012      03        13        073              0.166583       5.256561       0.000000       0.222666   -9999.000000   -9999.000000       0.049500       0.759000
53776     53776     shanxi         112.7631       37.6897           89       171     2012      03        14        074              0.198130       6.968903       0.000000       0.224904   -9999.000000   -9999.000000   -9999.000000       0.607000
53776     53776     shanxi         112.7631       37.6897           89       171     2012      03        15        075              0.205917       7.155518       0.000000       0.222378   -9999.000000       0.079300       0.070000       0.824000
53776     53776     shanxi         112.7631       37.6897           89       171     2012      03        16        076              0.247833       4.604492       0.000000       0.225970       0.062000   -9999.000000       0.066600   -9999.000000
53776     53776     shanxi         112.7631       37.6897           89       171     2012      03        17        077              0.258375       8.165802       0.000000       0.230547       0.069000   -9999.000000       0.052400       0.516000
53776     53776     shanxi         112.7631       37.6897           89       171     2012      03        18        078              0.253833      10.519257       0.000000       0.228229   -9999.000000   -9999.000000       0.034800       0.426000
53776     53776     shanxi         112.7631       37.6897           89       171     2012      03        19        079              0.251875       6.024170       0.347133       0.220544   -9999.000000   -9999.000000       0.064900       0.810000
53776     53776     shanxi         112.7631       37.6897           89       171     2012      03        20        080              0.258333       2.937195       0.081605       0.220593   -9999.000000       0.210200       0.059900       0.878000
53776     53776     shanxi         112.7631       37.6897           89       171     2012      03        21        081              0.259833       7.235809       0.143555       0.229365   -9999.000000   -9999.000000       0.081400   -9999.000000
53776     53776     shanxi         112.7631       37.6897           89       171     2012      03        22        082              0.263667       4.667053       0.814332       0.230414   -9999.000000       0.121600   -9999.000000       0.925000
53776     53776     shanxi         112.7631       37.6897           89       171     2012      03        23        083              0.259667       5.276306       0.999676       0.233011   -9999.000000   -9999.000000       0.037600       0.896000
53776     53776     shanxi         112.7631       37.6897           89       171     2012      03        24        084              0.256500       6.009125       0.000000       0.226851   -9999.000000   -9999.000000   -9999.000000       0.632000
53776     53776     shanxi         112.7631       37.6897           89       171     2012      03        25        085              0.000000       9.817352       0.000000       0.222573       0.055000   -9999.000000       0.051200       0.723000
53776     53776     shanxi         112.7631       37.6897           89       171     2012      03        26        086              0.254333      10.897095       0.000000       0.217197       0.058000   -9999.000000       0.051800   -9999.000000
53776     53776     shanxi         112.7631       37.6897           89       171     2012      03        27        087              0.253000      12.327026       0.000000       0.211193       0.064000   -9999.000000       0.068700       0.687000
53776     53776     shanxi         112.7631       37.6897           89       171     2012      03        28        088              0.252625      13.712341       0.000000       0.205236       0.073000   -9999.000000   -9999.000000       0.555000
53776     53776     shanxi         112.7631       37.6897           89       171     2012      03        29        089              0.252958      14.497711       0.112866       0.203067   -9999.000000   -9999.000000       0.010000       0.588000
53776     53776     shanxi         112.7631       37.6897           89       171     2012      03        30        090              0.248875      14.519165       0.189622       0.200172   -9999.000000       0.037200       0.057500       0.624000
53776     53776     shanxi         112.7631       37.6897           89       171     2012      03        31        091              0.247625       9.539703       0.000000       0.198983       0.056000   -9999.000000       0.047000   -9999.000000
53776     53776     shanxi         112.7631       37.6897           89       171     2012      04        01        092              0.244500      13.152191       0.000000       0.197489       0.064000   -9999.000000       0.063700       0.753000
53776     53776     shanxi         112.7631       37.6897           89       171     2012      04        02        093              0.241250      12.518188       0.000000       0.195281   -9999.000000   -9999.000000       0.059800       0.549000
53776     53776     shanxi         112.7631       37.6897           89       171     2012      04        03        094              0.240417       7.840088       0.000000       0.196681   -9999.000000   -9999.000000       0.052200       0.526000
53776     53776     shanxi         112.7631       37.6897           89       171     2012      04        04        095              0.239250      11.862396       0.875877       0.195325   -9999.000000   -9999.000000       0.029700       0.571000
53776     53776     shanxi         112.7631       37.6897           89       171     2012      04        05        096              0.237000      14.627228       0.000000       0.191853       0.045000   -9999.000000       0.058300   -9999.000000
53776     53776     shanxi         112.7631       37.6897           89       171     2012      04        06        097              0.234833      15.017944       0.000000       0.188336       0.062000       0.186800       0.050300       0.747000
53776     53776     shanxi         112.7631       37.6897           89       171     2012      04        07        098              0.232870      16.059143       1.413083       0.185064       0.060000   -9999.000000       0.060500       0.550000
53776     53776     shanxi         112.7631       37.6897           89       171     2012      04        08        099              0.231500      17.339203       0.373731       0.183218   -9999.000000   -9999.000000   -9999.000000       0.763000
53776     53776     shanxi         112.7631       37.6897           89       171     2012      04        09        100              0.229583      18.910706       0.000000       0.181545       0.073000       0.216900       0.036700       0.242000
53776     53776     shanxi         112.7631       37.6897           89       171     2012      04        10        101              0.232667      18.920319       2.526949       0.181603       0.035000   -9999.000000       0.073800       0.401000
53776     53776     shanxi         112.7631       37.6897           89       171     2012      04        11        102              0.249458      16.079681       5.686970       0.211962       0.063000   -9999.000000       0.053800       1.000000
53776     53776     shanxi         112.7631       37.6897           89       171     2012      04        12        103              0.262750      13.511749       0.000000       0.242644       0.088000   -9999.000000       0.066700       0.954000
53776     53776     shanxi         112.7631       37.6897           89       171     2012      04        13        104              0.255000      13.875519       0.230975       0.250478       0.066000   -9999.000000       0.074500       0.790000
53776     53776     shanxi         112.7631       37.6897           89       171     2012      04        14        105              0.248667      16.311798       0.000000       0.230443   -9999.000000   -9999.000000   -9999.000000   -9999.000000
53776     53776     shanxi         112.7631       37.6897           89       171     2012      04        15        106              0.244417      16.559540       0.749821       0.217174       0.054000       0.001100       0.010000       0.829000
53776     53776     shanxi         112.7631       37.6897           89       171     2012      04        16        107              0.240292      17.781525       0.223740       0.209564       0.048000       0.069000       0.062000       0.624000
53776     53776     shanxi         112.7631       37.6897           89       171     2012      04        17        108              0.235333      18.069550       0.172038       0.201165       0.055000       0.056400       0.057300       0.676000
53776     53776     shanxi         112.7631       37.6897           89       171     2012      04        18        109              0.239583      18.919067       4.264759       0.194453       0.067000   -9999.000000   -9999.000000       1.000000
53776     53776     shanxi         112.7631       37.6897           89       171     2012      04        19        110              0.245167      19.290894       0.000000       0.224490       0.083000       0.219800   -9999.000000   -9999.000000
53776     53776     shanxi         112.7631       37.6897           89       171     2012      04        20        111              0.238333      17.441528       1.251273       0.231599   -9999.000000       0.034100       0.068100       0.449000
53776     53776     shanxi         112.7631       37.6897           89       171     2012      04        21        112              0.237000      18.467865       0.000000       0.217188       0.049000   -9999.000000       0.039000       0.939000
53776     53776     shanxi         112.7631       37.6897           89       171     2012      04        22        113              0.233217      19.565521       2.819727       0.214665       0.058000   -9999.000000       0.064500       0.631000
53776     53776     shanxi         112.7631       37.6897           89       171     2012      04        23        114              0.237333      20.799286       3.056909       0.229569       0.064000   -9999.000000       0.052700       0.782000
53776     53776     shanxi         112.7631       37.6897           89       171     2012      04        24        115              0.289542      23.962219       3.246924       0.219015   -9999.000000       0.147200       0.112200   -9999.000000
53776     53776     shanxi         112.7631       37.6897           89       171     2012      04        25        116              0.000000      13.887146       0.000000       0.271183   -9999.000000   -9999.000000   -9999.000000       0.938000
53776     53776     shanxi         112.7631       37.6897           89       171     2012      04        26        117              0.263542      14.465149       0.349219       0.240529       0.040000   -9999.000000       0.042200       0.830000
53776     53776     shanxi         112.7631       37.6897           89       171     2012      04        27        118              0.256125      19.058533       2.042090       0.222941       0.055000   -9999.000000   -9999.000000       0.534000
53776     53776     shanxi         112.7631       37.6897           89       171     2012      04        28        119              0.249250      20.476562       0.720410       0.206938       0.054000   -9999.000000       0.054900       0.727000
53776     53776     shanxi         112.7631       37.6897           89       171     2012      04        29        120              0.244125      20.392059       0.000000       0.195614       0.060000       0.178100       0.050800   -9999.000000
53776     53776     shanxi         112.7631       37.6897           89       171     2012      04        30        121              0.239542      22.670013       0.000000       0.187851       0.074000       0.086000       0.067500       0.684000
53776     53776     shanxi         112.7631       37.6897           89       171     2012      05        01        122              0.233167      24.721680       0.471608       0.184031       0.070500   -9999.000000       0.069500       0.614000
53776     53776     shanxi         112.7631       37.6897           89       171     2012      05        02        123              0.227750      22.379211       0.000000       0.184689       0.075000   -9999.000000       0.010000       0.446000
53776     53776     shanxi         112.7631       37.6897           89       171     2012      05        03        124              0.220000      25.350708       0.000000       0.181059       0.071000   -9999.000000       0.070400       0.449000
53776     53776     shanxi         112.7631       37.6897           89       171     2012      05        04        125              0.210333      25.707336       0.000000       0.178179       0.071000   -9999.000000       0.053000   -9999.000000
53776     53776     shanxi         112.7631       37.6897           89       171     2012      05        05        126              0.198917      26.657898       0.507688       0.175996       0.083000   -9999.000000       0.066300       0.687000
53776     53776     shanxi         112.7631       37.6897           89       171     2012      05        06        127              0.188750      26.859039       0.000000       0.175142       0.083000   -9999.000000   -9999.000000       0.553000
53776     53776     shanxi         112.7631       37.6897           89       171     2012      05        07        128              0.179083      27.510956       0.000000       0.174365   -9999.000000       0.121800       0.047200       0.741000
53776     53776     shanxi         112.7631       37.6897           89       171     2012      05        08        129              0.167083      27.514709       0.189808       0.174364       0.064000       0.070600       0.037300       0.332000
53776     53776     shanxi         112.7631       37.6897           89       171     2012      05        09        130              0.159083      27.384125       1.001059       0.174774       0.091000   -9999.000000       0.065500       0.626000
53776     53776     shanxi         112.7631       37.6897           89       171     2012      05        10        131              0.153391      22.529694       0.410982       0.189576       0.085000       0.177900       0.048600       0.595000
53776     53776     shanxi         112.7631       37.6897           89       171     2012      05        11        132              0.177917      27.429901       6.350446       0.180736   -9999.000000   -9999.000000       0.083700       0.472000
53776     53776     shanxi         112.7631       37.6897           89       171     2012      05        12        133              0.200417      20.080963       0.000000       0.241839       0.061000       0.126500   -9999.000000       0.282000
53776     53776     shanxi         112.7631       37.6897           89       171     2012      05        13        134              0.188292      18.778625       0.000000       0.227345       0.072000   -9999.000000       0.026500   -9999.000000
53776     53776     shanxi         112.7631       37.6897           89       171     2012      05        14        135              0.176625      18.439148       0.000000       0.209708       0.074000   -9999.000000       0.069100       0.462000
53776     53776     shanxi         112.7631       37.6897           89       171     2012      05        15        136              0.162667      20.259705       0.000000       0.194922   -9999.000000   -9999.000000       0.053300       0.707000
53776     53776     shanxi         112.7631       37.6897           89       171     2012      05        16        137              0.150375      21.736755       0.182680       0.185193   -9999.000000   -9999.000000       0.062400       0.616000
53776     53776     shanxi         112.7631       37.6897           89       171     2012      05        17        138              0.138542      22.694916       0.000000       0.180043       0.055000   -9999.000000       0.066900       0.610000
53776     53776     shanxi         112.7631       37.6897           89       171     2012      05        18        139              0.128667      25.013184       0.000000       0.176241       0.087000       0.050500       0.064200   -9999.000000
53776     53776     shanxi         112.7631       37.6897           89       171     2012      05        19        140              0.120167      27.087036       0.000000       0.174555       0.074000   -9999.000000       0.018900       0.606000
53776     53776     shanxi         112.7631       37.6897           89       171     2012      05        20        141              0.114250      27.900177       1.057223       0.173836       0.068000   -9999.000000       0.067700       0.856000
53776     53776     shanxi         112.7631       37.6897           89       171     2012      05        21        142              0.108167      26.257294       1.479969       0.181589       0.155000       0.146500       0.066000       0.535000
53776     53776     shanxi         112.7631       37.6897           89       171     2012      05        22        143              0.108917      19.727570       0.000000       0.198553       0.085500   -9999.000000       0.070500       0.746000
53776     53776     shanxi         112.7631       37.6897           89       171     2012      05        23        144              0.106250      22.575134       0.127857       0.193613   -9999.000000       0.146800   -9999.000000   -9999.000000
53776     53776     shanxi         112.7631       37.6897           89       171     2012      05        24        145              0.102083      23.080292       0.263358       0.180414       0.081000   -9999.000000       0.058200       0.437000
53776     53776     shanxi         112.7631       37.6897           89       171     2012      05        25        146              0.000000      24.310333       0.246075       0.175277       0.089000       0.178200       0.056900       0.508000
53776     53776     shanxi         112.7631       37.6897           89       171     2012      05        26        147              0.094875      24.506409       0.000000       0.174118       0.111000       0.024700       0.068900       0.565000
53776     53776     shanxi         112.7631       37.6897           89       171     2012      05        27        148              0.091250      26.390228       0.302087       0.171574       0.100000       0.171800       0.055200       0.674000
53776     53776     shanxi         112.7631       37.6897           89       171     2012      05        28        149              0.088333      28.243927       7.816306       0.169246       0.081500       0.044400       0.069700   -9999.000000
53776     53776     shanxi         112.7631       37.6897           89       171     2012      05        29        150              0.128250      28.053986       2.205432       0.187302       0.104000   -9999.000000   -9999.000000       0.698000
53776     53776     shanxi         112.7631       37.6897           89       171     2012      05        30        151              0.123625      22.871918       0.433321       0.257824       0.090000       0.109300       0.039300   -9999.000000
53776     53776     shanxi         112.7631       37.6897           89       171     2012      05        31        152              0.115375      23.814819       9.089952       0.216370       0.179000       0.231200   -9999.000000   -9999.000000
53776     53776     shanxi         112.7631       37.6897           89       171     2012      06        01        153              0.124750      22.013123       3.937644       0.251372       0.136000   -9999.000000       0.073600       0.755000
53776     53776     shanxi         112.7631       37.6897           89       171     2012      06        02        154              0.125625      21.872833       0.316806       0.285997       0.094000       0.190700       0.075200   -9999.000000
53776     53776     shanxi         112.7631       37.6897           89       171     2012      06        03        155              0.137625      23.125519       7.001063       0.253310   -9999.000000   -9999.000000       0.097200       1.000000
53776     53776     shanxi         112.7631       37.6897           89       171     2012      06        04        156              0.154292      20.458557       7.680387       0.290437       0.091000       0.129800       0.099600       0.527000
53776     53776     shanxi         112.7631       37.6897           89       171     2012      06        05        157              0.142708      24.820404       0.306225       0.255205   -9999.000000       0.162600       0.058000       0.785000
53776     53776     shanxi         112.7631       37.6897           89       171     2012      06        06        158              0.131542      25.230408       0.593260       0.233291       0.117000   -9999.000000       0.097300       0.278000
53776     53776     shanxi         112.7631       37.6897           89       171     2012      06        07        159              0.121542      22.933502       0.850703       0.226061       0.087500   -9999.000000       0.082900       0.628000
53776     53776     shanxi         112.7631       37.6897           89       171     2012      06        08        160              0.111417      23.281433       0.000000       0.221621       0.102000       0.065600       0.095100       0.674000
53776     53776     shanxi         112.7631       37.6897           89       171     2012      06        09        161              0.102708      25.639221       0.482035       0.207333       0.076000   -9999.000000   -9999.000000       0.620000
53776     53776     shanxi         112.7631       37.6897           89       171     2012      06        10        162              0.094750      27.563904       0.000000       0.194505       0.071000       0.175900       0.070000       0.367000
53776     53776     shanxi         112.7631       37.6897           89       171     2012      06        11        163              0.000000      25.294861       0.000000       0.186468       0.118000   -9999.000000       0.076600   -9999.000000
53776     53776     shanxi         112.7631       37.6897           89       171     2012      06        12        164              0.087609      26.190826       0.000000       0.181544       0.092000   -9999.000000       0.087400       0.659000
53776     53776     shanxi         112.7631       37.6897           89       171     2012      06        13        165              0.085917      28.123383       0.323584       0.178363       0.085500       0.144900       0.077400       0.688000
53776     53776     shanxi         112.7631       37.6897           89       171     2012      06        14        166              0.084250      27.867096       0.000000       0.176631       0.089000   -9999.000000       0.082800       0.621000
53776     53776     shanxi         112.7631       37.6897           89       171     2012      06        15        167              0.082542      26.212921       0.000000       0.175473       0.095000   -9999.000000   -9999.000000       0.375000
53776     53776     shanxi         112.7631       37.6897           89       171     2012      06        16        168              0.081208      26.692810       0.000000       0.174482       0.118000   -9999.000000       0.027200   -9999.000000
53776     53776     shanxi         112.7631       37.6897           89       171     2012      06        17        169              0.080458      28.880920       0.000000       0.172525       0.118000       0.208900       0.087200       0.559000
53776     53776     shanxi         112.7631       37.6897           89       171     2012      06        18        170              0.079333      30.708679       0.210268       0.171173       0.094000       0.150000       0.070700       0.826000
53776     53776     shanxi         112.7631       37.6897           89       171     2012      06        19        171              0.077542      31.759308       1.330086       0.170622       0.103000   -9999.000000       0.080100       0.582000
53776     53776     shanxi         112.7631       37.6897           89       171     2012      06        20        172              0.075333      29.349762       0.000000       0.182164       0.101000   -9999.000000       0.085400       0.748000
53776     53776     shanxi         112.7631       37.6897           89       171     2012      06        21        173              0.076458      26.984314       5.516955       0.178525       0.164000   -9999.000000       0.094600   -9999.000000
53776     53776     shanxi         112.7631       37.6897           89       171     2012      06        22        174              0.082333      26.583221       2.183284       0.221222       0.147000   -9999.000000       0.066000       0.783000
53776     53776     shanxi         112.7631       37.6897           89       171     2012      06        23        175              0.081708      28.334625       1.570371       0.227390       0.065000       0.281300       0.101200       0.823000
53776     53776     shanxi         112.7631       37.6897           89       171     2012      06        24        176              0.079458      27.563812       1.559518       0.220366       0.137000   -9999.000000       0.079700       0.678000
53776     53776     shanxi         112.7631       37.6897           89       171     2012      06        25        177              0.079125      24.797150       4.510841       0.224885       0.119000   -9999.000000       0.125100       0.983000
53776     53776     shanxi         112.7631       37.6897           89       171     2012      06        26        178              0.079042      25.655121       3.881248       0.253799       0.152000       0.212900   -9999.000000   -9999.000000
53776     53776     shanxi         112.7631       37.6897           89       171     2012      06        27        179              0.078125      24.040009       6.312151       0.267045       0.166000   -9999.000000       0.107800       0.591000
53776     53776     shanxi         112.7631       37.6897           89       171     2012      06        28        180              0.147000      22.569611      33.890629       0.262355       0.143000   -9999.000000       0.126600       1.000000
53776     53776     shanxi         112.7631       37.6897           89       171     2012      06        29        181              0.254875      20.394684       5.873871       0.349613       0.165500   -9999.000000       0.128100       1.000000
53776     53776     shanxi         112.7631       37.6897           89       171     2012      06        30        182              0.234250      22.489075       1.074855       0.349746       0.116000   -9999.000000       0.117600   -9999.000000
53776     53776     shanxi         112.7631       37.6897           89       171     2012      07        01        183              0.215500      25.737579       0.000000       0.315526       0.098000       0.238000       0.111700   -9999.000000
53776     53776     shanxi         112.7631       37.6897           89       171     2012      07        02        184              0.198542      27.400543      10.108654       0.296457       0.159000       0.164900   -9999.000000       0.583000
53776     53776     shanxi         112.7631       37.6897           89       171     2012      07        03        185              0.182750      27.384888       0.874385       0.281663       0.123000       0.233300       0.045400   -9999.000000
53776     53776     shanxi         112.7631       37.6897           89       171     2012      07        04        186              0.167208      26.194885       0.210890       0.272630       0.142500   -9999.000000       0.116700       0.819000
53776     53776     shanxi         112.7631       37.6897           89       171     2012      07        05        187              0.153458      25.795990       0.000000       0.266157       0.113000   -9999.000000       0.094200       0.487000
53776     53776     shanxi         112.7631       37.6897           89       171     2012      07        06        188              0.138083      27.980377       0.299112       0.250492   -9999.000000       0.137800       0.112800       0.547000
53776     53776     shanxi         112.7631       37.6897           89       171     2012      07        07        189              0.127792      29.017975       0.200666       0.236952   -9999.000000   -9999.000000   -9999.000000       0.776000
53776     53776     shanxi         112.7631       37.6897           89       171     2012      07        08        190              0.122391      26.669739      17.415777       0.231887       0.224000   -9999.000000       0.137500       0.784000
53776     53776     shanxi         112.7631       37.6897           89       171     2012      07        09        191              0.230500      25.897888      28.189503       0.296637       0.190000   -9999.000000       0.118900       1.000000
53776     53776     shanxi         112.7631       37.6897           89       171     2012      07        10        192              0.260167      22.841858       4.264842       0.368168       0.159000   -9999.000000       0.147500   -9999.000000
53776     53776     shanxi         112.7631       37.6897           89       171     2012      07        11        193              0.246625      25.505615       0.000000       0.346148       0.130000       0.299200       0.132000       1.000000
53776     53776     shanxi         112.7631       37.6897           89       171     2012      07        12        194              0.230083      26.978088       0.000000       0.323220       0.164000   -9999.000000       0.139800       0.701000
53776     53776     shanxi         112.7631       37.6897           89       171     2012      07        13        195              0.217250      27.861694       6.279210       0.306844       0.185000       0.409100   -9999.000000       0.805000
53776     53776     shanxi         112.7631       37.6897           89       171     2012      07        14        196              0.215083      24.804443       4.821514       0.321542       0.136000       0.318000       0.102900       1.000000
53776     53776     shanxi         112.7631       37.6897           89       171     2012      07        15        197              0.206083      23.612091       1.483293       0.322905       0.158500       0.257000       0.142100   -9999.000000
53776     53776     shanxi         112.7631       37.6897           89       171     2012      07        16        198              0.194792      23.723663       0.000000       0.321739       0.124000   -9999.000000       0.128100       0.843000
53776     53776     shanxi         112.7631       37.6897           89       171     2012      07        17        199              0.179625      25.113342       0.000000       0.302456       0.124000   -9999.000000       0.120300       0.883000
53776     53776     shanxi         112.7631       37.6897           89       171     2012      07        18        200              0.168583      25.308990       0.000000       0.290843       0.148000   -9999.000000       0.141800       0.678000
53776     53776     shanxi         112.7631       37.6897           89       171     2012      07        19        201              0.157208      25.790131       0.000000       0.281424       0.151000       0.298200       0.136000       0.766000
53776     53776     shanxi         112.7631       37.6897           89       171     2012      07        20        202              0.147783      26.755920       8.893403       0.270444       0.091000   -9999.000000       0.079500   -9999.000000
53776     53776     shanxi         112.7631       37.6897           89       171     2012      07        21        203              0.188417      27.844208      22.034414       0.287549   -9999.000000   -9999.000000       0.155600       1.000000
53776     53776     shanxi         112.7631       37.6897           89       171     2012      07        22        204              0.224250      24.051575       0.000000       0.358222       0.138000   -9999.000000       0.131100       0.798000
53776     53776     shanxi         112.7631       37.6897           89       171     2012      07        23        205              0.200167      24.991699       1.573164       0.328976   -9999.000000   -9999.000000       0.158300       0.763000
53776     53776     shanxi         112.7631       37.6897           89       171     2012      07        24        206              0.194500      25.311707       3.544676       0.316853       0.199000       0.217100   -9999.000000       0.926000
53776     53776     shanxi         112.7631       37.6897           89       171     2012      07        25        207              0.197000      23.968109       0.506957       0.321868       0.138000   -9999.000000       0.153900   -9999.000000
53776     53776     shanxi         112.7631       37.6897           89       171     2012      07        26        208              0.193000      26.188965      18.641123       0.315477       0.189000       0.392400       0.146300       1.000000
53776     53776     shanxi         112.7631       37.6897           89       171     2012      07        27        209              0.207167      26.320099       0.945208       0.341906       0.162000   -9999.000000       0.163800       1.000000
53776     53776     shanxi         112.7631       37.6897           89       171     2012      07        28        210              0.200417      26.081055       0.102824       0.338400       0.126000   -9999.000000       0.146300       0.971000
53776     53776     shanxi         112.7631       37.6897           89       171     2012      07        29        211              0.186458      28.237366       0.000000       0.320607       0.185000   -9999.000000       0.162900       0.619000
53776     53776     shanxi         112.7631       37.6897           89       171     2012      07        30        212              0.220250      29.073273      65.948181       0.305890   -9999.000000   -9999.000000   -9999.000000   -9999.000000
53776     53776     shanxi         112.7631       37.6897           89       171     2012      07        31        213              0.297625      24.071167      12.374706       0.377463       0.204500   -9999.000000       0.133700       1.000000
53776     53776     shanxi         112.7631       37.6897           89       171     2012      08        01        214              0.276917      21.178467       0.000000       0.386427       0.179000   -9999.000000       0.201700   -9999.000000
53776     53776     shanxi         112.7631       37.6897           89       171     2012      08        02        215              0.266958      23.324005       0.000000       0.361218       0.150000   -9999.000000       0.171100       0.977000
53776     53776     shanxi         112.7631       37.6897           89       171     2012      08        03        216              0.257000      25.591339       0.000000       0.348469       0.191000   -9999.000000       0.189000       0.723000
53776     53776     shanxi         112.7631       37.6897           89       171     2012      08        04        217              0.248917      25.898590       0.000000       0.338044       0.199000   -9999.000000       0.184500       0.750000
53776     53776     shanxi         112.7631       37.6897           89       171     2012      08        05        218              0.241083      26.313629       0.314804       0.329525       0.160500   -9999.000000       0.171900       0.873000
53776     53776     shanxi         112.7631       37.6897           89       171     2012      08        06        219              0.236167      24.632080       0.000000       0.327314       0.176500   -9999.000000       0.087900       0.836000
53776     53776     shanxi         112.7631       37.6897           89       171     2012      08        07        220              0.228333      26.636383       0.000000       0.320410       0.139000   -9999.000000   -9999.000000       0.888000
53776     53776     shanxi         112.7631       37.6897           89       171     2012      08        08        221              0.221000      27.767273       6.027499       0.313511       0.233000       0.271400       0.143300   -9999.000000
53776     53776     shanxi         112.7631       37.6897           89       171     2012      08        09        222              0.215833      26.745026       0.000000       0.319840       0.194000   -9999.000000       0.160400       0.763000
53776     53776     shanxi         112.7631       37.6897           89       171     2012      08        10        223              0.205250      25.926270       0.209994       0.311724       0.124500   -9999.000000   -9999.000000       0.840000
53776     53776     shanxi         112.7631       37.6897           89       171     2012      08        11        224              0.197500      25.811829       1.671384       0.300382       0.176000       0.244200       0.146300       0.783000
53776     53776     shanxi         112.7631       37.6897           89       171     2012      08        12        225              0.200333      25.250458       1.328269       0.301161       0.180000   -9999.000000       0.136900       1.000000
53776     53776     shanxi         112.7631       37.6897           89       171     2012      08        13        226              0.199167      22.535187       0.447267       0.310961       0.169000   -9999.000000       0.196300   -9999.000000
53776     53776     shanxi         112.7631       37.6897           89       171     2012      08        14        227              0.229304      23.141388       9.450279       0.302734       0.206000   -9999.000000       0.177600       1.000000
53776     53776     shanxi         112.7631       37.6897           89       171     2012      08        15        228              0.230667      21.561371       0.000000       0.336210       0.194000       0.297100       0.190300       0.892000
53776     53776     shanxi         112.7631       37.6897           89       171     2012      08        16        229              0.216500      24.552704       0.000000       0.312693       0.146000       0.179700   -9999.000000       0.772000
53776     53776     shanxi         112.7631       37.6897           89       171     2012      08        17        230              0.234083      24.814026      16.640301       0.302610   -9999.000000   -9999.000000       0.115700       1.000000
53776     53776     shanxi         112.7631       37.6897           89       171     2012      08        18        231              0.263250      21.896057       3.568477       0.349650       0.182000   -9999.000000       0.189200   -9999.000000
53776     53776     shanxi         112.7631       37.6897           89       171     2012      08        19        232              0.253208      22.052826       0.000000       0.345449       0.212000   -9999.000000       0.164100       0.903000
53776     53776     shanxi         112.7631       37.6897           89       171     2012      08        20        233              0.243917      24.483429       0.180141       0.327028       0.191000   -9999.000000       0.208200       0.960000
53776     53776     shanxi         112.7631       37.6897           89       171     2012      08        21        234              0.232417      23.994385       0.000000       0.318473       0.057000       0.218900       0.193800       0.917000
53776     53776     shanxi         112.7631       37.6897           89       171     2012      08        22        235              0.218500      21.226349       0.000000       0.306975       0.137000   -9999.000000       0.182500   -9999.000000
53776     53776     shanxi         112.7631       37.6897           89       171     2012      08        23        236              0.208000      21.473236       0.000000       0.299517       0.126000   -9999.000000       0.122000   -9999.000000
53776     53776     shanxi         112.7631       37.6897           89       171     2012      08        24        237              0.200083      21.384644       0.000000       0.294763       0.108000       0.096000       0.197700       0.659000
53776     53776     shanxi         112.7631       37.6897           89       171     2012      08        25        238              0.000000      23.088898       0.000000       0.287792       0.197000       0.146500       0.161300       0.826000
53776     53776     shanxi         112.7631       37.6897           89       171     2012      08        26        239              0.184167      23.522461       0.656134       0.283040       0.170000       0.263300       0.194100       0.628000
53776     53776     shanxi         112.7631       37.6897           89       171     2012      08        27        240              0.178083      24.386932       6.458003       0.277584       0.158000   -9999.000000   -9999.000000       0.607000
53776     53776     shanxi         112.7631       37.6897           89       171     2012      08        28        241              0.170958      24.019806       7.188830       0.307236       0.134000       0.077300       0.129900   -9999.000000
53776     53776     shanxi         112.7631       37.6897           89       171     2012      08        29        242              0.161000      24.847290       0.000000       0.284207       0.127000       0.134000       0.175100       0.759000
53776     53776     shanxi         112.7631       37.6897           89       171     2012      08        30        243              0.152583      25.412476       0.000000       0.270972       0.197000   -9999.000000       0.144000       0.673000
53776     53776     shanxi         112.7631       37.6897           89       171     2012      08        31        244              0.146333      25.854675       2.641090       0.263299       0.183000       0.162400       0.150500       0.820000
53776     53776     shanxi         112.7631       37.6897           89       171     2012      09        01        245              0.239875      24.592896      43.338215       0.266479       0.204000   -9999.000000       0.235000       1.000000
53776     53776     shanxi         112.7631       37.6897           89       171     2012      09        02        246              0.259208      19.783569       0.000000       0.382581       0.166000       0.160000   -9999.000000       1.000000
53776     53776     shanxi         112.7631       37.6897           89       171     2012      09        03        247              0.245042      20.199799       0.000000       0.347491       0.150000   -9999.000000       0.052000       0.910000
53776     53776     shanxi         112.7631       37.6897           89       171     2012      09        04        248              0.233667      19.699158       2.896512       0.331775       0.108000   -9999.000000       0.184700       0.785000
53776     53776     shanxi         112.7631       37.6897           89       171     2012      09        05        249              0.262708      19.866730      12.193915       0.326170   -9999.000000   -9999.000000       0.172400       1.000000
53776     53776     shanxi         112.7631       37.6897           89       171     2012      09        06        250              0.301458      19.569733      22.586475       0.350629   -9999.000000   -9999.000000       0.192900   -9999.000000
53776     53776     shanxi         112.7631       37.6897           89       171     2012      09        07        251              0.280375      17.582001       0.000000       0.377592       0.139000       0.381500   -9999.000000       1.000000
53776     53776     shanxi         112.7631       37.6897           89       171     2012      09        08        252              0.271167      20.472351       0.000000       0.350657       0.139000   -9999.000000       0.155900       0.530000
53776     53776     shanxi         112.7631       37.6897           89       171     2012      09        09        253              0.263958      20.644257       0.000000       0.339512       0.150000       0.264600       0.122100       0.832000
53776     53776     shanxi         112.7631       37.6897           89       171     2012      09        10        254              0.258667      21.791992       0.802851       0.331096       0.204000   -9999.000000       0.162400       0.896000
53776     53776     shanxi         112.7631       37.6897           89       171     2012      09        11        255              0.254083      20.603119       0.000000       0.326034   -9999.000000       0.010900       0.134100   -9999.000000
53776     53776     shanxi         112.7631       37.6897           89       171     2012      09        12        256              0.247042      20.486023       0.000000       0.321331       0.109000       0.418600       0.157600       0.749000
53776     53776     shanxi         112.7631       37.6897           89       171     2012      09        13        257              0.241458      15.970337       0.242615       0.316900       0.118000       0.175200   -9999.000000       0.928000
53776     53776     shanxi         112.7631       37.6897           89       171     2012      09        14        258              0.237667      16.508026       0.000000       0.313248       0.122000   -9999.000000       0.092100       0.801000
53776     53776     shanxi         112.7631       37.6897           89       171     2012      09        15        259              0.233333      17.789703       0.512380       0.308832   -9999.000000       0.185900       0.159100       0.791000
53776     53776     shanxi         112.7631       37.6897           89       171     2012      09        16        260              0.229000      17.955292       0.000000       0.305970   -9999.000000       0.230900       0.134000   -9999.000000
53776     53776     shanxi         112.7631       37.6897           89       171     2012      09        17        261              0.225583      18.486664       0.000000       0.301705       0.112000       0.240900       0.130800       0.589000
53776     53776     shanxi         112.7631       37.6897           89       171     2012      09        18        262              0.225667      18.513336       2.289448       0.299300       0.127000   -9999.000000       0.159700       0.612000
53776     53776     shanxi         112.7631       37.6897           89       171     2012      09        19        263              0.226250      18.561127       1.264212       0.304114       0.125000   -9999.000000   -9999.000000       0.852000
53776     53776     shanxi         112.7631       37.6897           89       171     2012      09        20        264              0.225917      18.305756       2.130744       0.305759       0.118000       0.146800       0.072100       0.802000
53776     53776     shanxi         112.7631       37.6897           89       171     2012      09        21        265              0.227417      19.656677       3.926001       0.302434   -9999.000000       0.159600       0.170400   -9999.000000
53776     53776     shanxi         112.7631       37.6897           89       171     2012      09        22        266              0.227833      16.434052       0.000000       0.326169   -9999.000000   -9999.000000       0.145600       0.827000
53776     53776     shanxi         112.7631       37.6897           89       171     2012      09        23        267              0.225083      19.268890       0.000000       0.310679       0.126000       0.303100       0.161800       1.000000
53776     53776     shanxi         112.7631       37.6897           89       171     2012      09        24        268              0.221667      20.322510       0.417174       0.303330       0.124000   -9999.000000   -9999.000000       0.575000
53776     53776     shanxi         112.7631       37.6897           89       171     2012      09        25        269              0.225500      19.820557      12.932687       0.298680       0.183000       0.220600       0.143000       1.000000
53776     53776     shanxi         112.7631       37.6897           89       171     2012      09        26        270              0.229833      16.216431       0.000000       0.339356   -9999.000000       0.192900       0.119900   -9999.000000
53776     53776     shanxi         112.7631       37.6897           89       171     2012      09        27        271              0.227143      17.968323       0.000000       0.324809   -9999.000000   -9999.000000       0.160400       0.800000
53776     53776     shanxi         112.7631       37.6897           89       171     2012      09        28        272              0.216133      16.228607       1.629778       0.313718       0.073000   -9999.000000       0.126800   -9999.000000
53776     53776     shanxi         112.7631       37.6897           89       171     2012      09        29        273              0.212500      14.731781       0.304837       0.309989       0.126000   -9999.000000       0.155000       0.715000
53776     53776     shanxi         112.7631       37.6897           89       171     2012      09        30        274              0.208583      14.865753       0.180964       0.306953       0.122000   -9999.000000   -9999.000000       0.313000
53776     53776     shanxi         112.7631       37.6897           89       171     2012      10        01        275              0.205667      15.378632       0.303837       0.302144       0.107000   -9999.000000       0.075200       0.565000
53776     53776     shanxi         112.7631       37.6897           89       171     2012      10        02        276              0.204167      16.179871       0.245653       0.299388   -9999.000000   -9999.000000       0.128000       0.809000
53776     53776     shanxi         112.7631       37.6897           89       171     2012      10        03        277              0.202833      17.053589       0.213774       0.297389       0.068000       0.189200       0.109800       0.737000
53776     53776     shanxi         112.7631       37.6897           89       171     2012      10        04        278              0.211000      17.730286       5.792824       0.293406       0.095000       0.285500       0.148500       1.000000
53776     53776     shanxi         112.7631       37.6897           89       171     2012      10        05        279              0.219417      14.572144       0.335772       0.317181       0.100000       0.191900       0.126100   -9999.000000
53776     53776     shanxi         112.7631       37.6897           89       171     2012      10        06        280              0.215833      14.742462       0.000000       0.306724       0.106000       0.246400       0.126500       0.774000
53776     53776     shanxi         112.7631       37.6897           89       171     2012      10        07        281              0.212667      15.989899       0.000000       0.299778   -9999.000000   -9999.000000       0.047900       0.803000
53776     53776     shanxi         112.7631       37.6897           89       171     2012      10        08        282              0.211333      15.463196       4.581573       0.297180   -9999.000000       0.158700       0.118700       0.782000
53776     53776     shanxi         112.7631       37.6897           89       171     2012      10        09        283              0.211917      16.170959       0.000000       0.309504       0.080000       0.315200       0.099300       0.793000
53776     53776     shanxi         112.7631       37.6897           89       171     2012      10        10        284              0.207417      14.081024       0.629179       0.305308       0.089000       0.226500       0.120300   -9999.000000
53776     53776     shanxi         112.7631       37.6897           89       171     2012      10        11        285              0.206083      13.727448       0.000000       0.298423       0.077000       0.170600   -9999.000000       0.766000
53776     53776     shanxi         112.7631       37.6897           89       171     2012      10        12        286              0.204000      15.115082       0.000000       0.295034   -9999.000000   -9999.000000       0.093000       0.944000
53776     53776     shanxi         112.7631       37.6897           89       171     2012      10        13        287              0.201833      15.319916       0.000000       0.291359   -9999.000000       0.140800       0.096600       0.635000
53776     53776     shanxi         112.7631       37.6897           89       171     2012      10        14        288              0.200333      15.163818       1.098929       0.287985       0.067500       0.060700       0.125800       0.801000
53776     53776     shanxi         112.7631       37.6897           89       171     2012      10        15        289              0.199333      14.441589       2.215784       0.288253       0.122000       0.239700       0.088000   -9999.000000
53776     53776     shanxi         112.7631       37.6897           89       171     2012      10        16        290              0.199667      10.551910       0.000000       0.306714       0.089000   -9999.000000       0.103600       0.739000
53776     53776     shanxi         112.7631       37.6897           89       171     2012      10        17        291              0.195833       9.848785       0.000000       0.297156       0.082000       0.092700   -9999.000000       0.827000
53776     53776     shanxi         112.7631       37.6897           89       171     2012      10        18        292              0.194000       9.975281       0.017376       0.291865   -9999.000000   -9999.000000       0.026200       0.613000
53776     53776     shanxi         112.7631       37.6897           89       171     2012      10        19        293              0.193333      10.890320       0.000000       0.290143   -9999.000000   -9999.000000       0.096200       0.746000
53776     53776     shanxi         112.7631       37.6897           89       171     2012      10        20        294              0.193333      12.268066       0.134947       0.287590       0.064000   -9999.000000       0.084500   -9999.000000
53776     53776     shanxi         112.7631       37.6897           89       171     2012      10        21        295              0.200417      14.076965       4.846276       0.285660   -9999.000000       0.188800       0.106200       0.969000
53776     53776     shanxi         112.7631       37.6897           89       171     2012      10        22        296              0.207667       8.997772       0.000000       0.311210   -9999.000000       0.193900       0.102100       0.949000
53776     53776     shanxi         112.7631       37.6897           89       171     2012      10        23        297              0.206083       8.912598       3.687239       0.299756   -9999.000000   -9999.000000       0.086100       0.690000
53776     53776     shanxi         112.7631       37.6897           89       171     2012      10        24        298              0.204167       9.393982       8.163832       0.295967   -9999.000000   -9999.000000       0.048900       0.293000
53776     53776     shanxi         112.7631       37.6897           89       171     2012      10        25        299              0.000000      11.051758       0.000000       0.292633       0.053000   -9999.000000       0.086600   -9999.000000
53776     53776     shanxi         112.7631       37.6897           89       171     2012      10        26        300              0.201417      12.263580       0.090441       0.289676   -9999.000000       0.254900       0.077200       0.464000
53776     53776     shanxi         112.7631       37.6897           89       171     2012      10        27        301              0.200167       9.842194       0.000000       0.290288       0.075000       0.177400       0.089600   -9999.000000
53776     53776     shanxi         112.7631       37.6897           89       171     2012      10        28        302              0.000000      11.426849       0.000000       0.287515       0.089500   -9999.000000   -9999.000000       0.811000
53776     53776     shanxi         112.7631       37.6897           89       171     2012      10        29        303              0.196500      11.539948       0.000000       0.285081   -9999.000000       0.146300       0.045700       0.367000
53776     53776     shanxi         112.7631       37.6897           89       171     2012      10        30        304              0.191417       9.599152       0.000000       0.282497       0.061000   -9999.000000       0.074200       0.481000
53776     53776     shanxi         112.7631       37.6897           89       171     2012      10        31        305              0.190125       7.624084       0.000000       0.279250       0.065000   -9999.000000       0.062600       0.598000
53776     53776     shanxi         112.7631       37.6897           89       171     2012      11        01        306              0.188875       8.213196       0.953084       0.278856       0.063000       0.105200       0.065600       0.628000
53776     53776     shanxi         112.7631       37.6897           89       171     2012      11        02        307              0.189333       8.726318       1.197484       0.278974       0.079000   -9999.000000       0.075700       0.840000
53776     53776     shanxi         112.7631       37.6897           89       171     2012      11        03        308              0.202417      10.167633       2.544532       0.280303   -9999.000000   -9999.000000   -9999.000000   -9999.000000
53776     53776     shanxi         112.7631       37.6897           89       171     2012      11        04        309              0.199750       3.652466       0.379437       0.264710   -9999.000000       0.186300       0.010000       0.381000
53776     53776     shanxi         112.7631       37.6897           89       171     2012      11        05        310              0.197500       1.445465       9.205182       0.244139   -9999.000000   -9999.000000       0.072200       0.773000
53776     53776     shanxi         112.7631       37.6897           89       171     2012      11        06        311              0.199167       3.768646       0.000000       0.265739   -9999.000000       0.274100       0.060600       0.658000
53776     53776     shanxi         112.7631       37.6897           89       171     2012      11        07        312              0.200000       5.581848       0.146289       0.276536   -9999.000000   -9999.000000       0.079600       0.904000
53776     53776     shanxi         112.7631       37.6897           89       171     2012      11        08        313              0.199500       4.952698       0.296229       0.274907   -9999.000000   -9999.000000   -9999.000000   -9999.000000
53776     53776     shanxi         112.7631       37.6897           89       171     2012      11        09        314              0.200000       6.295166       2.195144       0.277841   -9999.000000       0.110500       0.073700       0.634000
53776     53776     shanxi         112.7631       37.6897           89       171     2012      11        10        315              0.213750       5.418732       0.739701       0.286159   -9999.000000   -9999.000000       0.065500       0.862000
53776     53776     shanxi         112.7631       37.6897           89       171     2012      11        11        316              0.211500       2.458557       0.059419       0.265657   -9999.000000       0.115000       0.065900       0.586000
53776     53776     shanxi         112.7631       37.6897           89       171     2012      11        12        317              0.207167       1.754578       0.231484       0.249978   -9999.000000   -9999.000000       0.060600       0.800000
53776     53776     shanxi         112.7631       37.6897           89       171     2012      11        13        318              0.000000       2.805756       0.236074       0.260175   -9999.000000   -9999.000000       0.073100   -9999.000000
53776     53776     shanxi         112.7631       37.6897           89       171     2012      11        14        319              0.201826       2.832825       0.233387       0.255208   -9999.000000       0.050300   -9999.000000       0.530000
53776     53776     shanxi         112.7631       37.6897           89       171     2012      11        15        320              0.203333       3.485901       0.350446       0.262566   -9999.000000   -9999.000000       0.023600       0.854000
53776     53776     shanxi         112.7631       37.6897           89       171     2012      11        16        321              0.207000       1.895599       0.442365       0.261386   -9999.000000       0.074200       0.062700       0.694000
53776     53776     shanxi         112.7631       37.6897           89       171     2012      11        17        322              0.000000       2.476227       1.810581       0.257392   -9999.000000   -9999.000000       0.058600       0.757000
53776     53776     shanxi         112.7631       37.6897           89       171     2012      11        18        323              0.215333       3.438568       0.000000       0.266965   -9999.000000   -9999.000000       0.062700   -9999.000000
53776     53776     shanxi         112.7631       37.6897           89       171     2012      11        19        324              0.212000       3.953796       0.000000       0.269031   -9999.000000       0.058900       0.075000       0.511000
53776     53776     shanxi         112.7631       37.6897           89       171     2012      11        20        325              0.212000       3.758820       0.165578       0.269740   -9999.000000   -9999.000000       0.064000       0.874000
53776     53776     shanxi         112.7631       37.6897           89       171     2012      11        21        326              0.212500       3.898407       0.000000       0.276435   -9999.000000       0.051400       0.015500       0.550000
53776     53776     shanxi         112.7631       37.6897           89       171     2012      11        22        327              0.210333       4.657776       0.000000       0.279085   -9999.000000   -9999.000000       0.066200       0.504000
53776     53776     shanxi         112.7631       37.6897           89       171     2012      11        23        328              0.207000       2.338745       0.000000       0.260348   -9999.000000       0.242200       0.044500   -9999.000000
53776     53776     shanxi         112.7631       37.6897           89       171     2012      11        24        329              0.200083       1.230316      17.059750       0.237350   -9999.000000       0.090800       0.066300       0.213000
53776     53776     shanxi         112.7631       37.6897           89       171     2012      11        25        330              0.200917       1.552979       0.000000       0.242989   -9999.000000   -9999.000000   -9999.000000   -9999.000000
53776     53776     shanxi         112.7631       37.6897           89       171     2012      11        26        331              0.194667       1.060730       0.000000       0.237449   -9999.000000   -9999.000000   -9999.000000       0.269000
53776     53776     shanxi         112.7631       37.6897           89       171     2012      11        27        332              0.187125       1.038452       0.000000       0.232854   -9999.000000       0.110300       0.034200   -9999.000000
53776     53776     shanxi         112.7631       37.6897           89       171     2012      11        28        333              0.178583       1.811432       0.000000       0.240230   -9999.000000   -9999.000000       0.054200       0.138000
53776     53776     shanxi         112.7631       37.6897           89       171     2012      11        29        334              0.155292      -0.592651       0.000000       0.212679   -9999.000000       0.057200       0.037300       0.222000
53776     53776     shanxi         112.7631       37.6897           89       171     2012      11        30        335              0.135792      -0.699677       0.000000       0.210266   -9999.000000   -9999.000000       0.056300       0.590000
53776     53776     shanxi         112.7631       37.6897           89       171     2012      12        01        336              0.126083      -0.002686       0.000000       0.215799   -9999.000000   -9999.000000   -9999.000000       0.207000
53776     53776     shanxi         112.7631       37.6897           89       171     2012      12        02        337              0.128542      -1.865662       0.000000       0.185153   -9999.000000       0.067500       0.010800   -9999.000000
53776     53776     shanxi         112.7631       37.6897           89       171     2012      12        03        338              0.106750      -1.479950       0.000000       0.196249   -9999.000000       0.166800       0.056300       0.345000
53776     53776     shanxi         112.7631       37.6897           89       171     2012      12        04        339              0.094250      -2.022675       0.000000       0.193963   -9999.000000       0.070900       0.040800       0.604000
53776     53776     shanxi         112.7631       37.6897           89       171     2012      12        05        340              0.087500      -0.449127       0.000000       0.210681   -9999.000000   -9999.000000       0.052200       0.442000
53776     53776     shanxi         112.7631       37.6897           89       171     2012      12        06        341              0.083833      -2.731995       0.000000       0.186779   -9999.000000       0.144800       0.057300       0.721000
53776     53776     shanxi         112.7631       37.6897           89       171     2012      12        07        342              0.081167      -1.336517       0.000000       0.197240   -9999.000000       0.033300       0.050700   -9999.000000
53776     53776     shanxi         112.7631       37.6897           89       171     2012      12        08        343              0.072417      -2.579346       0.000000       0.189869   -9999.000000       0.121500       0.014300       0.361000
53776     53776     shanxi         112.7631       37.6897           89       171     2012      12        09        344              0.068167      -4.705200       0.000000       0.170849   -9999.000000   -9999.000000       0.055000       0.668000
53776     53776     shanxi         112.7631       37.6897           89       171     2012      12        10        345              0.068625      -3.463959       0.000000       0.176948   -9999.000000   -9999.000000       0.033100       0.524000
53776     53776     shanxi         112.7631       37.6897           89       171     2012      12        11        346              0.067500      -2.761475       0.000000       0.187483   -9999.000000       0.143000       0.049100       0.529000
53776     53776     shanxi         112.7631       37.6897           89       171     2012      12        12        347              0.067250      -3.054657       0.000000       0.183241   -9999.000000   -9999.000000   -9999.000000   -9999.000000
53776     53776     shanxi         112.7631       37.6897           89       171     2012      12        13        348              0.070208      -2.928619       0.000000       0.181059   -9999.000000   -9999.000000       0.031600       0.346000
53776     53776     shanxi         112.7631       37.6897           89       171     2012      12        14        349              0.074208      -3.340179       0.735824       0.171158   -9999.000000   -9999.000000       0.051800       0.613000
53776     53776     shanxi         112.7631       37.6897           89       171     2012      12        15        350              0.000000      -2.142639       0.000000       0.189279   -9999.000000   -9999.000000       0.057600       0.371000
53776     53776     shanxi         112.7631       37.6897           89       171     2012      12        16        351              0.084250      -0.457825       0.000000       0.207786   -9999.000000       0.119100   -9999.000000       0.808000
53776     53776     shanxi         112.7631       37.6897           89       171     2012      12        17        352              0.081375      -0.111084       0.000000       0.214886   -9999.000000       0.018000       0.049700   -9999.000000
53776     53776     shanxi         112.7631       37.6897           89       171     2012      12        18        353              0.067458      -2.591858       0.000000       0.192419   -9999.000000   -9999.000000   -9999.000000       0.462000
53776     53776     shanxi         112.7631       37.6897           89       171     2012      12        19        354              0.067083      -3.318146       0.000000       0.177839   -9999.000000       0.069700       0.010000       0.735000
53776     53776     shanxi         112.7631       37.6897           89       171     2012      12        20        355              0.000000      -3.226135       0.100967       0.174812   -9999.000000       0.058800       0.047700       0.137000
53776     53776     shanxi         112.7631       37.6897           89       171     2012      12        21        356              0.070333      -3.618378       0.280131       0.169914   -9999.000000       0.155100       0.031100       0.473000
53776     53776     shanxi         112.7631       37.6897           89       171     2012      12        22        357              0.065542      -3.583282       0.000000       0.179230   -9999.000000       0.071500       0.044600   -9999.000000
53776     53776     shanxi         112.7631       37.6897           89       171     2012      12        23        358              0.060208      -7.740784       0.000000       0.158351   -9999.000000   -9999.000000   -9999.000000       0.469000
53776     53776     shanxi         112.7631       37.6897           89       171     2012      12        24        359              0.059389     -10.134979       0.000000       0.145432   -9999.000000       0.137900       0.037300   -9999.000000
53776     53776     shanxi         112.7631       37.6897           89       171     2012      12        25        360              0.059542      -7.222473       0.000000       0.147470   -9999.000000       0.020000       0.015200       0.621000
53776     53776     shanxi         112.7631       37.6897           89       171     2012      12        26        361              0.000000      -6.028656       0.000000       0.153393   -9999.000000       0.190700       0.048400       0.046000
53776     53776     shanxi         112.7631       37.6897           89       171     2012      12        27        362              0.059727      -5.186798       0.000000       0.159006   -9999.000000   -9999.000000       0.032300       0.512000
53776     53776     shanxi         112.7631       37.6897           89       171     2012      12        28        363              0.059000      -4.284668       0.133172       0.168668   -9999.000000   -9999.000000       0.048600       0.456000
53776     53776     shanxi         112.7631       37.6897           89       171     2012      12        29        364              0.000000      -5.068268       0.000000       0.161994   -9999.000000   -9999.000000   -9999.000000       0.183000
53776     53776     shanxi         112.7631       37.6897           89       171     2012      12        30        365              0.000000      -8.165009       0.000000       0.151504   -9999.000000   -9999.000000       0.015400       0.141000
53776     53776     shanxi         112.7631       37.6897           89       171     2012      12        31        366              0.055467      -6.212524       0.000000       0.156405   -9999.000000   -9999.000000       0.045800   -9999.000000
