# Supplementary material for: Research on Fusing Multisatellite Soil Moisture Data Based on Bayesian Model Averaging
Source: Hindawi journal article supplement (doi:10.1155/2018/9310838), 2018-06-25
Supplement: f1 [file 9310838.f1.zip › 2012_sm00-10cm_daily_ZDB_ZHY_53783_366days_allin.txt]

53783     53783     shanxi         113.7000       37.6000           90       175     2012      01        01        001              0.000000   -9999.000000       0.000000   -9999.000000   -9999.000000   -9999.000000       0.029900   -9999.000000
53783     53783     shanxi         113.7000       37.6000           90       175     2012      01        02        002              0.099125      -2.994843       0.000000       0.167752   -9999.000000       0.078900       0.030900       0.141000
53783     53783     shanxi         113.7000       37.6000           90       175     2012      01        03        003              0.000000      -3.923798       0.000000       0.159656   -9999.000000   -9999.000000   -9999.000000       0.049000
53783     53783     shanxi         113.7000       37.6000           90       175     2012      01        04        004              0.091625      -6.431091       0.000000       0.137823   -9999.000000   -9999.000000       0.026700   -9999.000000
53783     53783     shanxi         113.7000       37.6000           90       175     2012      01        05        005              0.090667      -6.078766       0.000000       0.145746   -9999.000000   -9999.000000       0.030700       0.142000
53783     53783     shanxi         113.7000       37.6000           90       175     2012      01        06        006              0.089833      -4.926025       0.000000       0.158609   -9999.000000   -9999.000000       0.036100       0.128000
53783     53783     shanxi         113.7000       37.6000           90       175     2012      01        07        007              0.093292      -5.892517       0.000000       0.145587   -9999.000000       0.097400       0.031500       0.082000
53783     53783     shanxi         113.7000       37.6000           90       175     2012      01        08        008              0.000000      -4.202972       0.000000       0.148042   -9999.000000   -9999.000000       0.032600       0.068000
53783     53783     shanxi         113.7000       37.6000           90       175     2012      01        09        009              0.093625      -3.321716       0.000000       0.167900   -9999.000000   -9999.000000   -9999.000000   -9999.000000
53783     53783     shanxi         113.7000       37.6000           90       175     2012      01        10        010              0.092682      -2.178802       0.000000       0.175850   -9999.000000   -9999.000000       0.010900       0.010000
53783     53783     shanxi         113.7000       37.6000           90       175     2012      01        11        011              0.091250      -3.478363       0.000000       0.169461   -9999.000000   -9999.000000       0.032700       0.135000
53783     53783     shanxi         113.7000       37.6000           90       175     2012      01        12        012              0.091667      -4.195282       0.000000       0.160929   -9999.000000       0.072200       0.032400       0.142000
53783     53783     shanxi         113.7000       37.6000           90       175     2012      01        13        013              0.091333      -2.829315       0.000000       0.174356       0.086000   -9999.000000       0.030400       0.019000
53783     53783     shanxi         113.7000       37.6000           90       175     2012      01        14        014              0.092750      -2.536102       0.000000       0.174569   -9999.000000   -9999.000000       0.033200   -9999.000000
53783     53783     shanxi         113.7000       37.6000           90       175     2012      01        15        015              0.092250      -2.824097       0.000000       0.169184   -9999.000000       0.064000       0.033000       0.043000
53783     53783     shanxi         113.7000       37.6000           90       175     2012      01        16        016              0.092250      -3.579132       0.000000       0.166046   -9999.000000   -9999.000000       0.023900       0.064000
53783     53783     shanxi         113.7000       37.6000           90       175     2012      01        17        017              0.000000      -3.770111       0.000000       0.157453   -9999.000000       0.152300       0.026400       0.050000
53783     53783     shanxi         113.7000       37.6000           90       175     2012      01        18        018              0.093167      -1.982330       0.000000       0.177296   -9999.000000   -9999.000000       0.031300       0.004000
53783     53783     shanxi         113.7000       37.6000           90       175     2012      01        19        019              0.094500      -3.453827       0.360922       0.162076   -9999.000000   -9999.000000       0.029100       0.120000
53783     53783     shanxi         113.7000       37.6000           90       175     2012      01        20        020              0.096000      -2.228882       0.181689       0.171727   -9999.000000   -9999.000000   -9999.000000       0.018000
53783     53783     shanxi         113.7000       37.6000           90       175     2012      01        21        021              0.094417      -6.126068       0.000000       0.138925   -9999.000000   -9999.000000       0.018300   -9999.000000
53783     53783     shanxi         113.7000       37.6000           90       175     2012      01        22        022              0.091667      -9.845154       0.000000       0.130204   -9999.000000   -9999.000000       0.024700       0.024000
53783     53783     shanxi         113.7000       37.6000           90       175     2012      01        23        023              0.091000      -8.816864       6.432023       0.128127   -9999.000000   -9999.000000       0.026300   -9999.000000
53783     53783     shanxi         113.7000       37.6000           90       175     2012      01        24        024              0.091000      -8.263855       0.000000       0.128281   -9999.000000   -9999.000000   -9999.000000       0.181000
53783     53783     shanxi         113.7000       37.6000           90       175     2012      01        25        025              0.090750      -7.891266       0.000000       0.128431   -9999.000000   -9999.000000       0.029600       0.038000
53783     53783     shanxi         113.7000       37.6000           90       175     2012      01        26        026              0.091542      -6.153839       0.000000       0.143692   -9999.000000   -9999.000000   -9999.000000       0.156000
53783     53783     shanxi         113.7000       37.6000           90       175     2012      01        27        027              0.091833      -2.423981       0.000000       0.176967   -9999.000000   -9999.000000       0.010100       0.006000
53783     53783     shanxi         113.7000       37.6000           90       175     2012      01        28        028              0.093583      -3.120972       0.000000       0.170500       0.085000   -9999.000000       0.033800   -9999.000000
53783     53783     shanxi         113.7000       37.6000           90       175     2012      01        29        029              0.094875      -2.622986       0.000000       0.172535   -9999.000000   -9999.000000       0.032800       0.178000
53783     53783     shanxi         113.7000       37.6000           90       175     2012      01        30        030              0.095042      -4.091156       0.000000       0.153067   -9999.000000       0.093200       0.032800       0.041000
53783     53783     shanxi         113.7000       37.6000           90       175     2012      01        31        031              0.095083      -1.680695       0.000000       0.180901   -9999.000000   -9999.000000       0.031800       0.216000
53783     53783     shanxi         113.7000       37.6000           90       175     2012      02        01        032              0.092875      -1.680481       0.000000       0.181137   -9999.000000   -9999.000000       0.030500       0.046000
53783     53783     shanxi         113.7000       37.6000           90       175     2012      02        02        033              0.089667      -5.186798       0.000000       0.160350   -9999.000000   -9999.000000       0.024300   -9999.000000
53783     53783     shanxi         113.7000       37.6000           90       175     2012      02        03        034              0.090958      -4.451843       0.000000       0.160163       0.084000   -9999.000000       0.033600       0.095000
53783     53783     shanxi         113.7000       37.6000           90       175     2012      02        04        035              0.091417      -2.200348       0.000000       0.177786   -9999.000000       0.081500       0.033900       0.119000
53783     53783     shanxi         113.7000       37.6000           90       175     2012      02        05        036              0.093500      -4.204224       0.000000       0.154515   -9999.000000   -9999.000000       0.034200       0.233000
53783     53783     shanxi         113.7000       37.6000           90       175     2012      02        06        037              0.092833      -0.111664       0.000000       0.192578   -9999.000000   -9999.000000   -9999.000000       0.051000
53783     53783     shanxi         113.7000       37.6000           90       175     2012      02        07        038              0.089625      -4.305328       0.000000       0.169065   -9999.000000   -9999.000000       0.025100   -9999.000000
53783     53783     shanxi         113.7000       37.6000           90       175     2012      02        08        039              0.089750      -6.369659       0.000000       0.140943   -9999.000000   -9999.000000       0.037000       0.050000
53783     53783     shanxi         113.7000       37.6000           90       175     2012      02        09        040              0.091583      -5.380066       0.000000       0.146784   -9999.000000   -9999.000000       0.035700       0.163000
53783     53783     shanxi         113.7000       37.6000           90       175     2012      02        10        041              0.091042      -4.639282       0.000000       0.150071   -9999.000000   -9999.000000       0.035100       0.209000
53783     53783     shanxi         113.7000       37.6000           90       175     2012      02        11        042              0.092174      -3.369232       0.000000       0.169807   -9999.000000   -9999.000000       0.033800       0.062000
53783     53783     shanxi         113.7000       37.6000           90       175     2012      02        12        043              0.093583      -0.723724       0.000000       0.186072   -9999.000000       0.089600   -9999.000000   -9999.000000
53783     53783     shanxi         113.7000       37.6000           90       175     2012      02        13        044              0.095417      -1.887573       0.000000       0.178553       0.092000       0.039200   -9999.000000       0.056000
53783     53783     shanxi         113.7000       37.6000           90       175     2012      02        14        045              0.097750       0.472351       0.000000       0.199302   -9999.000000   -9999.000000       0.036700       0.119000
53783     53783     shanxi         113.7000       37.6000           90       175     2012      02        15        046              0.098667      -0.322388       0.000000       0.193423       0.081000   -9999.000000       0.040300       0.020000
53783     53783     shanxi         113.7000       37.6000           90       175     2012      02        16        047              0.094667      -0.181488       0.000000       0.196542   -9999.000000   -9999.000000       0.032800       0.098000
53783     53783     shanxi         113.7000       37.6000           90       175     2012      02        17        048              0.092167      -2.963776       0.000000       0.175983   -9999.000000       0.179800       0.036900       0.093000
53783     53783     shanxi         113.7000       37.6000           90       175     2012      02        18        049              0.091833      -4.161407       0.000000       0.162356       0.070000   -9999.000000       0.036900       0.062000
53783     53783     shanxi         113.7000       37.6000           90       175     2012      02        19        050              0.092208      -3.126526       0.000000       0.170843       0.079000   -9999.000000       0.026200       0.214000
53783     53783     shanxi         113.7000       37.6000           90       175     2012      02        20        051              0.095833      -0.339874       0.000000       0.188848       0.086000   -9999.000000       0.036100       0.171000
53783     53783     shanxi         113.7000       37.6000           90       175     2012      02        21        052              0.098250       1.908905       0.000000       0.203285   -9999.000000       0.091800   -9999.000000   -9999.000000
53783     53783     shanxi         113.7000       37.6000           90       175     2012      02        22        053              0.103250       2.615692       0.000000       0.206565   -9999.000000   -9999.000000       0.047700       0.245000
53783     53783     shanxi         113.7000       37.6000           90       175     2012      02        23        054              0.104125       4.448242       0.000000       0.223219       0.063000       0.048400   -9999.000000       0.133000
53783     53783     shanxi         113.7000       37.6000           90       175     2012      02        24        055              0.105708       1.035461       0.000000       0.200843       0.083000   -9999.000000       0.030400       0.186000
53783     53783     shanxi         113.7000       37.6000           90       175     2012      02        25        056              0.103958       0.743164       0.000000       0.201135   -9999.000000       0.128800       0.038000       0.169000
53783     53783     shanxi         113.7000       37.6000           90       175     2012      02        26        057              0.103625      -0.634399       0.117085       0.188342   -9999.000000       0.031700       0.034200   -9999.000000
53783     53783     shanxi         113.7000       37.6000           90       175     2012      02        27        058              0.103708      -0.003784       0.000000       0.192955   -9999.000000   -9999.000000   -9999.000000       0.235000
53783     53783     shanxi         113.7000       37.6000           90       175     2012      02        28        059              0.105333       2.017487       0.000000       0.204923       0.065000   -9999.000000       0.037100       0.186000
53783     53783     shanxi         113.7000       37.6000           90       175     2012      02        29        060              0.000000   -9999.000000       0.000000   -9999.000000       0.083000   -9999.000000   -9999.000000   -9999.000000
53783     53783     shanxi         113.7000       37.6000           90       175     2012      03        01        061              0.110125       2.501862       0.143598       0.210287   -9999.000000   -9999.000000       0.010000       0.201000
53783     53783     shanxi         113.7000       37.6000           90       175     2012      03        02        062              0.109917       0.846375       0.122688       0.208460   -9999.000000   -9999.000000       0.033800   -9999.000000
53783     53783     shanxi         113.7000       37.6000           90       175     2012      03        03        063              0.109667      -0.071899       0.000000       0.195294   -9999.000000   -9999.000000       0.033600       0.306000
53783     53783     shanxi         113.7000       37.6000           90       175     2012      03        04        064              0.110750      -1.022400       0.000000       0.183915   -9999.000000   -9999.000000       0.042600       0.170000
53783     53783     shanxi         113.7000       37.6000           90       175     2012      03        05        065              0.112417       0.189362       0.335393       0.193867       0.097000   -9999.000000   -9999.000000       0.404000
53783     53783     shanxi         113.7000       37.6000           90       175     2012      03        06        066              0.107167       1.556976       0.000000       0.208420       0.086000   -9999.000000       0.035400       0.145000
53783     53783     shanxi         113.7000       37.6000           90       175     2012      03        07        067              0.000000       1.509827       0.000000       0.206684       0.090000       0.047500       0.033700   -9999.000000
53783     53783     shanxi         113.7000       37.6000           90       175     2012      03        08        068              0.110333       4.019897       0.000000       0.220847   -9999.000000   -9999.000000       0.043400       0.127000
53783     53783     shanxi         113.7000       37.6000           90       175     2012      03        09        069              0.110667       1.002747       0.000000       0.198643   -9999.000000   -9999.000000       0.046700       0.380000
53783     53783     shanxi         113.7000       37.6000           90       175     2012      03        10        070              0.114125       3.285187       0.000000       0.216383       0.077000   -9999.000000       0.049700       0.378000
53783     53783     shanxi         113.7000       37.6000           90       175     2012      03        11        071              0.110667       3.800354       0.000000       0.213507       0.084000   -9999.000000   -9999.000000       0.052000
53783     53783     shanxi         113.7000       37.6000           90       175     2012      03        12        072              0.110208       1.976074       0.000000       0.199324       0.085000   -9999.000000       0.030200   -9999.000000
53783     53783     shanxi         113.7000       37.6000           90       175     2012      03        13        073              0.112542       4.001587       0.084413       0.211610   -9999.000000   -9999.000000       0.042800       0.294000
53783     53783     shanxi         113.7000       37.6000           90       175     2012      03        14        074              0.114478       5.932129       0.000000       0.221591   -9999.000000   -9999.000000   -9999.000000       0.311000
53783     53783     shanxi         113.7000       37.6000           90       175     2012      03        15        075              0.115417       5.144348       0.000000       0.214777       0.067000   -9999.000000       0.046000       0.387000
53783     53783     shanxi         113.7000       37.6000           90       175     2012      03        16        076              0.129125       4.090485       0.000000       0.228659       0.085000   -9999.000000       0.047100       0.338000
53783     53783     shanxi         113.7000       37.6000           90       175     2012      03        17        077              0.165667       8.259796       0.000000       0.235405       0.080000   -9999.000000   -9999.000000       0.412000
53783     53783     shanxi         113.7000       37.6000           90       175     2012      03        18        078              0.185833      10.849609       0.322999       0.232705       0.080000   -9999.000000       0.027300       0.217000
53783     53783     shanxi         113.7000       37.6000           90       175     2012      03        19        079              0.179667       2.224640       0.582040       0.210355   -9999.000000       0.183100       0.047700       0.273000
53783     53783     shanxi         113.7000       37.6000           90       175     2012      03        20        080              0.215458       1.495819       0.334956       0.211327       0.076000   -9999.000000       0.055200       0.327000
53783     53783     shanxi         113.7000       37.6000           90       175     2012      03        21        081              0.231083       5.339722       1.453046       0.230605       0.102000   -9999.000000       0.058300   -9999.000000
53783     53783     shanxi         113.7000       37.6000           90       175     2012      03        22        082              0.286833       4.082764       3.579000       0.241416   -9999.000000   -9999.000000   -9999.000000       0.666000
53783     53783     shanxi         113.7000       37.6000           90       175     2012      03        23        083              0.277750       2.536285       0.199566       0.255416       0.081000   -9999.000000       0.045000       0.393000
53783     53783     shanxi         113.7000       37.6000           90       175     2012      03        24        084              0.276292       4.615173       0.000000       0.253201   -9999.000000   -9999.000000   -9999.000000       0.490000
53783     53783     shanxi         113.7000       37.6000           90       175     2012      03        25        085              0.000000       8.441895       0.000000       0.245156   -9999.000000   -9999.000000       0.048800       0.446000
53783     53783     shanxi         113.7000       37.6000           90       175     2012      03        26        086              0.288381       9.753235       0.000000       0.241294       0.072000   -9999.000000       0.042000   -9999.000000
53783     53783     shanxi         113.7000       37.6000           90       175     2012      03        27        087              0.290579      11.708282       0.000000       0.234231       0.073000       0.052400       0.047700       0.515000
53783     53783     shanxi         113.7000       37.6000           90       175     2012      03        28        088              0.286773      12.364197       0.000000       0.226515       0.083000   -9999.000000   -9999.000000       0.712000
53783     53783     shanxi         113.7000       37.6000           90       175     2012      03        29        089              0.308208      13.673126       0.000000       0.223121       0.074000   -9999.000000       0.031200       0.518000
53783     53783     shanxi         113.7000       37.6000           90       175     2012      03        30        090              0.313522      13.771210       0.000000       0.218878   -9999.000000   -9999.000000       0.042700       0.377000
53783     53783     shanxi         113.7000       37.6000           90       175     2012      03        31        091              0.300588       9.095612       0.000000       0.216496       0.068000   -9999.000000       0.039200   -9999.000000
53783     53783     shanxi         113.7000       37.6000           90       175     2012      04        01        092              0.288000      11.629852       0.000000       0.209777       0.080000   -9999.000000       0.040500       0.460000
53783     53783     shanxi         113.7000       37.6000           90       175     2012      04        02        093              0.000000       9.797760       0.260989       0.209784       0.077000   -9999.000000       0.053900       0.432000
53783     53783     shanxi         113.7000       37.6000           90       175     2012      04        03        094              0.000000       5.693329       0.165904       0.214679   -9999.000000   -9999.000000       0.051400       0.470000
53783     53783     shanxi         113.7000       37.6000           90       175     2012      04        04        095              0.000000      10.826721       0.000000       0.214429   -9999.000000   -9999.000000       0.031100       0.466000
53783     53783     shanxi         113.7000       37.6000           90       175     2012      04        05        096              0.000000      13.504120       0.000000       0.206426       0.067000   -9999.000000       0.050100   -9999.000000
53783     53783     shanxi         113.7000       37.6000           90       175     2012      04        06        097              0.000000      13.413879       0.000000       0.200715       0.077000       0.133700       0.044000       0.396000
53783     53783     shanxi         113.7000       37.6000           90       175     2012      04        07        098              0.263429      14.433319       0.000000       0.195488       0.074000       0.070500       0.048500       0.623000
53783     53783     shanxi         113.7000       37.6000           90       175     2012      04        08        099              0.264958      16.571686       0.000000       0.190338       0.071000       0.010100   -9999.000000       0.526000
53783     53783     shanxi         113.7000       37.6000           90       175     2012      04        09        100              0.263125      17.634155       0.000000       0.185648       0.075000   -9999.000000       0.047200       0.405000
53783     53783     shanxi         113.7000       37.6000           90       175     2012      04        10        101              0.262917      18.501373       1.798413       0.184214       0.081500   -9999.000000       0.053500   -9999.000000
53783     53783     shanxi         113.7000       37.6000           90       175     2012      04        11        102              0.278500      16.071320       6.968815       0.204772       0.098500   -9999.000000       0.073300       0.948000
53783     53783     shanxi         113.7000       37.6000           90       175     2012      04        12        103              0.282708      13.751984       0.678728       0.246228       0.101000   -9999.000000       0.062800       0.514000
53783     53783     shanxi         113.7000       37.6000           90       175     2012      04        13        104              0.275958      13.330841       0.000000       0.252909       0.089000   -9999.000000       0.058200       0.510000
53783     53783     shanxi         113.7000       37.6000           90       175     2012      04        14        105              0.269833      16.483185       0.000000       0.232576       0.080000       0.052000   -9999.000000       0.488000
53783     53783     shanxi         113.7000       37.6000           90       175     2012      04        15        106              0.264958      17.699951       0.354515       0.218616       0.084000       0.128400       0.034800       0.513000
53783     53783     shanxi         113.7000       37.6000           90       175     2012      04        16        107              0.261417      18.471039       0.000000       0.207438       0.074000       0.110700       0.059700       0.454000
53783     53783     shanxi         113.7000       37.6000           90       175     2012      04        17        108              0.259875      16.715485       0.000000       0.200732       0.071000       0.060800       0.053200       0.573000
53783     53783     shanxi         113.7000       37.6000           90       175     2012      04        18        109              0.256875      20.115387       3.997468       0.193206       0.065000   -9999.000000   -9999.000000       0.612000
53783     53783     shanxi         113.7000       37.6000           90       175     2012      04        19        110              0.256958      18.059540       0.574005       0.214841       0.076000   -9999.000000       0.062100   -9999.000000
53783     53783     shanxi         113.7000       37.6000           90       175     2012      04        20        111              0.253042      18.501892       0.258658       0.225772       0.087000       0.186800       0.062900       0.535000
53783     53783     shanxi         113.7000       37.6000           90       175     2012      04        21        112              0.252583      17.405640       3.597862       0.214783       0.079000   -9999.000000       0.045700       0.534000
53783     53783     shanxi         113.7000       37.6000           90       175     2012      04        22        113              0.251000      17.327362       3.494092       0.244869       0.085000       0.054700       0.060000       0.572000
53783     53783     shanxi         113.7000       37.6000           90       175     2012      04        23        114              0.253708      20.470154       2.822070       0.243526       0.083000   -9999.000000       0.056000       0.540000
53783     53783     shanxi         113.7000       37.6000           90       175     2012      04        24        115              0.295917      22.430542       2.745850       0.237789   -9999.000000       0.194700       0.082000   -9999.000000
53783     53783     shanxi         113.7000       37.6000           90       175     2012      04        25        116              0.000000      12.783569       0.000000       0.270595   -9999.000000       0.158500   -9999.000000       0.895000
53783     53783     shanxi         113.7000       37.6000           90       175     2012      04        26        117              0.271333      13.550201       0.000000       0.245047       0.084000   -9999.000000       0.058500       0.610000
53783     53783     shanxi         113.7000       37.6000           90       175     2012      04        27        118              0.264208      19.281311       0.000000       0.225597       0.085000       0.150300   -9999.000000       0.600000
53783     53783     shanxi         113.7000       37.6000           90       175     2012      04        28        119              0.260083      19.362823       0.000000       0.209656       0.080000   -9999.000000       0.067500       0.528000
53783     53783     shanxi         113.7000       37.6000           90       175     2012      04        29        120              0.256292      17.896912       0.000000       0.200010       0.066000   -9999.000000       0.057200   -9999.000000
53783     53783     shanxi         113.7000       37.6000           90       175     2012      04        30        121              0.255542      19.057709       0.000000       0.193157       0.085000       0.145500       0.066600       0.605000
53783     53783     shanxi         113.7000       37.6000           90       175     2012      05        01        122              0.252250      23.076111       0.073334       0.186621       0.099000   -9999.000000   -9999.000000       0.602000
53783     53783     shanxi         113.7000       37.6000           90       175     2012      05        02        123              0.249083      21.147369       0.000000       0.186454       0.097500       0.055000       0.040500       0.559000
53783     53783     shanxi         113.7000       37.6000           90       175     2012      05        03        124              0.242792      23.868500       0.000000       0.180715       0.085000   -9999.000000       0.067900       0.459000
53783     53783     shanxi         113.7000       37.6000           90       175     2012      05        04        125              0.237292      23.839325       0.000000       0.175210       0.086000   -9999.000000       0.059100   -9999.000000
53783     53783     shanxi         113.7000       37.6000           90       175     2012      05        05        126              0.230042      26.242157       0.000000       0.170587       0.096000   -9999.000000       0.061800       0.460000
53783     53783     shanxi         113.7000       37.6000           90       175     2012      05        06        127              0.225083      24.958923       0.000000       0.169322       0.082000   -9999.000000       0.060500       0.626000
53783     53783     shanxi         113.7000       37.6000           90       175     2012      05        07        128              0.219750      27.309814       0.278372       0.167728   -9999.000000   -9999.000000       0.077600       0.553000
53783     53783     shanxi         113.7000       37.6000           90       175     2012      05        08        129              0.214917      26.890106       0.000000       0.168087       0.082000       0.156500       0.051300       0.364000
53783     53783     shanxi         113.7000       37.6000           90       175     2012      05        09        130              0.213958      25.544403       3.272301       0.168552       0.080000   -9999.000000       0.084900   -9999.000000
53783     53783     shanxi         113.7000       37.6000           90       175     2012      05        10        131              0.218250      20.869934       0.511503       0.212944       0.089000   -9999.000000       0.069400       0.552000
53783     53783     shanxi         113.7000       37.6000           90       175     2012      05        11        132              0.237792      25.789490       4.205252       0.200046       0.166000   -9999.000000       0.086600       0.991000
53783     53783     shanxi         113.7000       37.6000           90       175     2012      05        12        133              0.241375      21.091522       0.137763       0.232065       0.113000       0.041800   -9999.000000       0.304000
53783     53783     shanxi         113.7000       37.6000           90       175     2012      05        13        134              0.231542      17.273956       0.400328       0.223215       0.110500       0.225300       0.058500       0.433000
53783     53783     shanxi         113.7000       37.6000           90       175     2012      05        14        135              0.221167      19.097961       0.000000       0.206316       0.101000   -9999.000000       0.079900       0.447000
53783     53783     shanxi         113.7000       37.6000           90       175     2012      05        15        136              0.213750      19.032410       0.000000       0.190478       0.110000       0.136700       0.089200       0.449000
53783     53783     shanxi         113.7000       37.6000           90       175     2012      05        16        137              0.205917      20.175415       0.000000       0.180075       0.104000   -9999.000000       0.079800       0.503000
53783     53783     shanxi         113.7000       37.6000           90       175     2012      05        17        138              0.201042      21.242767       0.000000       0.173444       0.098000   -9999.000000       0.084900       0.451000
53783     53783     shanxi         113.7000       37.6000           90       175     2012      05        18        139              0.196667      25.255920       0.000000       0.167978       0.109000   -9999.000000   -9999.000000   -9999.000000
53783     53783     shanxi         113.7000       37.6000           90       175     2012      05        19        140              0.193292      26.554199       0.401704       0.166158       0.092000   -9999.000000       0.049200       0.419000
53783     53783     shanxi         113.7000       37.6000           90       175     2012      05        20        141              0.194167      25.117676       0.510495       0.169888       0.074000   -9999.000000       0.089900       0.566000
53783     53783     shanxi         113.7000       37.6000           90       175     2012      05        21        142              0.201042      24.040131       3.669005       0.170019       0.151000       0.150200       0.089100       0.400000
53783     53783     shanxi         113.7000       37.6000           90       175     2012      05        22        143              0.217250      19.266327       0.242772       0.203512       0.137000   -9999.000000       0.091700       0.451000
53783     53783     shanxi         113.7000       37.6000           90       175     2012      05        23        144              0.211750      21.488068       0.772799       0.208817   -9999.000000   -9999.000000       0.090700   -9999.000000
53783     53783     shanxi         113.7000       37.6000           90       175     2012      05        24        145              0.201792      22.133698       0.280696       0.195971       0.108000   -9999.000000       0.094200       0.534000
53783     53783     shanxi         113.7000       37.6000           90       175     2012      05        25        146              0.000000      22.842499       0.506290       0.182473       0.103000   -9999.000000       0.077200       0.513000
53783     53783     shanxi         113.7000       37.6000           90       175     2012      05        26        147              0.178042      23.620392       0.000000       0.175986       0.120000   -9999.000000       0.093800       0.471000
53783     53783     shanxi         113.7000       37.6000           90       175     2012      05        27        148              0.162208      25.742371       0.000000       0.169198       0.115000   -9999.000000       0.083400       0.419000
53783     53783     shanxi         113.7000       37.6000           90       175     2012      05        28        149              0.149083      25.736359       1.785617       0.163359       0.111500       0.061800       0.090100   -9999.000000
53783     53783     shanxi         113.7000       37.6000           90       175     2012      05        29        150              0.143792      26.070862       3.564533       0.165044       0.138000   -9999.000000   -9999.000000       0.858000
53783     53783     shanxi         113.7000       37.6000           90       175     2012      05        30        151              0.144333      21.300568       0.693033       0.207775       0.114000   -9999.000000       0.081900   -9999.000000
53783     53783     shanxi         113.7000       37.6000           90       175     2012      05        31        152              0.137750      23.050659       1.586034       0.188872       0.150000   -9999.000000   -9999.000000   -9999.000000
53783     53783     shanxi         113.7000       37.6000           90       175     2012      06        01        153              0.134833      21.875427       2.032930       0.194810       0.145000   -9999.000000       0.098000       0.572000
53783     53783     shanxi         113.7000       37.6000           90       175     2012      06        02        154              0.132708      21.613373       0.781492       0.207732       0.143000       0.161400       0.091900   -9999.000000
53783     53783     shanxi         113.7000       37.6000           90       175     2012      06        03        155              0.132875      22.683716       3.589194       0.199452       0.160500       0.203000       0.112300       0.839000
53783     53783     shanxi         113.7000       37.6000           90       175     2012      06        04        156              0.138208      19.616669       0.000000       0.228296       0.119000       0.079600   -9999.000000       0.591000
53783     53783     shanxi         113.7000       37.6000           90       175     2012      06        05        157              0.131333      25.062073       0.040571       0.201736       0.130000   -9999.000000       0.065300       0.588000
53783     53783     shanxi         113.7000       37.6000           90       175     2012      06        06        158              0.122833      25.717651       0.000000       0.180706       0.137000   -9999.000000       0.104400       0.285000
53783     53783     shanxi         113.7000       37.6000           90       175     2012      06        07        159              0.120167      22.899872       0.096923       0.173958       0.125500   -9999.000000       0.097500   -9999.000000
53783     53783     shanxi         113.7000       37.6000           90       175     2012      06        08        160              0.116750      25.146759       0.000000       0.168840       0.131500       0.034600       0.093800       0.385000
53783     53783     shanxi         113.7000       37.6000           90       175     2012      06        09        161              0.112333      26.920746       0.142034       0.163994       0.119000       0.224100   -9999.000000       0.416000
53783     53783     shanxi         113.7000       37.6000           90       175     2012      06        10        162              0.104625      29.246429       0.000000       0.159715       0.109000       0.089000       0.084100       0.415000
53783     53783     shanxi         113.7000       37.6000           90       175     2012      06        11        163              0.000000      23.936829       0.000000       0.159606       0.128000   -9999.000000       0.095900       0.309000
53783     53783     shanxi         113.7000       37.6000           90       175     2012      06        12        164              0.097958      26.099365       0.000000       0.156343       0.129000   -9999.000000       0.115100       0.305000
53783     53783     shanxi         113.7000       37.6000           90       175     2012      06        13        165              0.093917      27.555359       0.460982       0.155094       0.132500   -9999.000000       0.107900       0.582000
53783     53783     shanxi         113.7000       37.6000           90       175     2012      06        14        166              0.091958      27.293793       0.000000       0.158506       0.129000   -9999.000000       0.106000       0.492000
53783     53783     shanxi         113.7000       37.6000           90       175     2012      06        15        167              0.090292      25.343109       0.000000       0.156614       0.128000   -9999.000000   -9999.000000       0.439000
53783     53783     shanxi         113.7000       37.6000           90       175     2012      06        16        168              0.088833      26.175690       0.000000       0.154585       0.138000   -9999.000000       0.085200   -9999.000000
53783     53783     shanxi         113.7000       37.6000           90       175     2012      06        17        169              0.086500      29.303680       0.000000       0.152947       0.134000   -9999.000000       0.115400       0.420000
53783     53783     shanxi         113.7000       37.6000           90       175     2012      06        18        170              0.085417      31.197937       0.000000       0.151853       0.122000       0.027700       0.096600       0.540000
53783     53783     shanxi         113.7000       37.6000           90       175     2012      06        19        171              0.083417      30.903381       0.637041       0.151502       0.146000   -9999.000000       0.095900       0.605000
53783     53783     shanxi         113.7000       37.6000           90       175     2012      06        20        172              0.084917      30.226013       6.059925       0.151767   -9999.000000       0.095500       0.106600       0.755000
53783     53783     shanxi         113.7000       37.6000           90       175     2012      06        21        173              0.091167      23.863708       4.655155       0.216197       0.163000   -9999.000000   -9999.000000   -9999.000000
53783     53783     shanxi         113.7000       37.6000           90       175     2012      06        22        174              0.095792      24.989197       0.869517       0.233824       0.152000   -9999.000000       0.080700       0.833000
53783     53783     shanxi         113.7000       37.6000           90       175     2012      06        23        175              0.126375      26.991638       3.542662       0.215138       0.156000       0.170900       0.116500       0.722000
53783     53783     shanxi         113.7000       37.6000           90       175     2012      06        24        176              0.163250      26.437988       8.018790       0.230096       0.174000   -9999.000000       0.120700       1.000000
53783     53783     shanxi         113.7000       37.6000           90       175     2012      06        25        177              0.166000      23.115967       0.429111       0.273433       0.150000   -9999.000000       0.145600       0.605000
53783     53783     shanxi         113.7000       37.6000           90       175     2012      06        26        178              0.155375      24.919922       8.337777       0.245744       0.142000       0.237500   -9999.000000   -9999.000000
53783     53783     shanxi         113.7000       37.6000           90       175     2012      06        27        179              0.149542      24.145172       4.265270       0.255540       0.182000   -9999.000000       0.139000       1.000000
53783     53783     shanxi         113.7000       37.6000           90       175     2012      06        28        180              0.231750      21.841431      38.398125       0.277950       0.203000       0.175600       0.145300       1.000000
53783     53783     shanxi         113.7000       37.6000           90       175     2012      06        29        181              0.273667      20.748657       8.344306       0.334548       0.191000   -9999.000000       0.158100       1.000000
53783     53783     shanxi         113.7000       37.6000           90       175     2012      06        30        182              0.247333      21.841248       0.000000       0.338034       0.176000       0.070900       0.141400   -9999.000000
53783     53783     shanxi         113.7000       37.6000           90       175     2012      07        01        183              0.224208      25.498474       0.000000       0.303799       0.174000       0.191000       0.128800   -9999.000000
53783     53783     shanxi         113.7000       37.6000           90       175     2012      07        02        184              0.204833      26.849640       2.459054       0.284911       0.180000   -9999.000000   -9999.000000       0.679000
53783     53783     shanxi         113.7000       37.6000           90       175     2012      07        03        185              0.183917      26.780853       0.354109       0.273387       0.164000       0.296600       0.104700       0.790000
53783     53783     shanxi         113.7000       37.6000           90       175     2012      07        04        186              0.203042      27.581573      18.918161       0.261986       0.131000   -9999.000000       0.148100       0.571000
53783     53783     shanxi         113.7000       37.6000           90       175     2012      07        05        187              0.262417      24.955536       0.000000       0.293821       0.170000   -9999.000000       0.127300       0.723000
53783     53783     shanxi         113.7000       37.6000           90       175     2012      07        06        188              0.246375      25.311157       0.778880       0.303716   -9999.000000       0.142100       0.129300   -9999.000000
53783     53783     shanxi         113.7000       37.6000           90       175     2012      07        07        189              0.239667      27.159424       1.562707       0.287450   -9999.000000   -9999.000000       0.133100       0.836000
53783     53783     shanxi         113.7000       37.6000           90       175     2012      07        08        190              0.265042      25.072662      27.317007       0.287388   -9999.000000       0.077900       0.149300   -9999.000000
53783     53783     shanxi         113.7000       37.6000           90       175     2012      07        09        191              0.318250      24.075378      71.894066       0.324754       0.234000   -9999.000000       0.111600       1.000000
53783     53783     shanxi         113.7000       37.6000           90       175     2012      07        10        192              0.295833      22.448120       1.878873       0.381061       0.191500   -9999.000000       0.136900       0.993000
53783     53783     shanxi         113.7000       37.6000           90       175     2012      07        11        193              0.289000      25.986511       0.000000       0.335999       0.191000       0.268100       0.123500       1.000000
53783     53783     shanxi         113.7000       37.6000           90       175     2012      07        12        194              0.303292      26.533630       8.622936       0.319174       0.187000       0.162100       0.119100       0.979000
53783     53783     shanxi         113.7000       37.6000           90       175     2012      07        13        195              0.310208      26.620514      15.936840       0.324558       0.220000   -9999.000000   -9999.000000       0.845000
53783     53783     shanxi         113.7000       37.6000           90       175     2012      07        14        196              0.310500      22.039215       1.618741       0.338854       0.192500       0.328800       0.125700       0.888000
53783     53783     shanxi         113.7000       37.6000           90       175     2012      07        15        197              0.302250      21.912537       0.000000       0.333950       0.207000   -9999.000000       0.125300   -9999.000000
53783     53783     shanxi         113.7000       37.6000           90       175     2012      07        16        198              0.294500      23.096252       0.000000       0.318514       0.189000       0.082200       0.158300       0.881000
53783     53783     shanxi         113.7000       37.6000           90       175     2012      07        17        199              0.288042      23.550018       0.000000       0.308446       0.180000   -9999.000000       0.142400       0.705000
53783     53783     shanxi         113.7000       37.6000           90       175     2012      07        18        200              0.282250      23.990173       0.000000       0.302199       0.197000   -9999.000000       0.147600       0.770000
53783     53783     shanxi         113.7000       37.6000           90       175     2012      07        19        201              0.276625      24.777344       0.000000       0.296632       0.183000   -9999.000000   -9999.000000       0.635000
53783     53783     shanxi         113.7000       37.6000           90       175     2012      07        20        202              0.271957      26.111481       1.216310       0.290158       0.161000   -9999.000000       0.122900   -9999.000000
53783     53783     shanxi         113.7000       37.6000           90       175     2012      07        21        203              0.300217      26.736664      11.468080       0.290398       0.220000       0.120300       0.156600       0.803000
53783     53783     shanxi         113.7000       37.6000           90       175     2012      07        22        204              0.296500      25.027100       0.000000       0.318921       0.182000   -9999.000000       0.137600       0.755000
53783     53783     shanxi         113.7000       37.6000           90       175     2012      07        23        205              0.284625      24.760406       0.454503       0.302363       0.195000       0.129500       0.097200       0.821000
53783     53783     shanxi         113.7000       37.6000           90       175     2012      07        24        206              0.282375      25.329498       2.443144       0.292256   -9999.000000       0.222800       0.101100       0.795000
53783     53783     shanxi         113.7000       37.6000           90       175     2012      07        25        207              0.297292      25.052338       8.721605       0.294212       0.176500   -9999.000000       0.109500   -9999.000000
53783     53783     shanxi         113.7000       37.6000           90       175     2012      07        26        208              0.336500      26.687042      29.021372       0.311552       0.223000       0.106200       0.095900       0.988000
53783     53783     shanxi         113.7000       37.6000           90       175     2012      07        27        209              0.340625      25.221191       5.965267       0.348761       0.222000   -9999.000000       0.112300       1.000000
53783     53783     shanxi         113.7000       37.6000           90       175     2012      07        28        210              0.328000      26.037415       0.000000       0.339100       0.180000       0.084000       0.101600       1.000000
53783     53783     shanxi         113.7000       37.6000           90       175     2012      07        29        211              0.318333      27.955566       0.000000       0.317700       0.208000       0.189400       0.103000       0.680000
53783     53783     shanxi         113.7000       37.6000           90       175     2012      07        30        212              0.331458      28.816528      29.268044       0.304983   -9999.000000   -9999.000000   -9999.000000   -9999.000000
53783     53783     shanxi         113.7000       37.6000           90       175     2012      07        31        213              0.426833      23.691528      31.766933       0.344404       0.269000   -9999.000000       0.102200       1.000000
53783     53783     shanxi         113.7000       37.6000           90       175     2012      08        01        214              0.376542      20.183746       0.277959       0.363449       0.239000       0.166200       0.106500       0.955000
53783     53783     shanxi         113.7000       37.6000           90       175     2012      08        02        215              0.340750      23.147247       0.127437       0.332833       0.207000       0.166700       0.111300       0.917000
53783     53783     shanxi         113.7000       37.6000           90       175     2012      08        03        216              0.330375      25.215820       1.404565       0.321009       0.217000       0.326700       0.099400       0.791000
53783     53783     shanxi         113.7000       37.6000           90       175     2012      08        04        217              0.323417      23.981476       1.502417       0.315351       0.244000   -9999.000000       0.101300   -9999.000000
53783     53783     shanxi         113.7000       37.6000           90       175     2012      08        05        218              0.322042      25.778534       0.248909       0.309346       0.189500       0.103200   -9999.000000       0.962000
53783     53783     shanxi         113.7000       37.6000           90       175     2012      08        06        219              0.318000      23.449951       0.080740       0.311652       0.225000       0.137000       0.086600   -9999.000000
53783     53783     shanxi         113.7000       37.6000           90       175     2012      08        07        220              0.313500      25.761902       0.000000       0.304786       0.186000   -9999.000000   -9999.000000       0.773000
53783     53783     shanxi         113.7000       37.6000           90       175     2012      08        08        221              0.326125      27.863586      13.382969       0.296095       0.154000       0.191300       0.106600       0.868000
53783     53783     shanxi         113.7000       37.6000           90       175     2012      08        09        222              0.332708      26.168732       3.801341       0.327231       0.204000   -9999.000000       0.123400       1.000000
53783     53783     shanxi         113.7000       37.6000           90       175     2012      08        10        223              0.316667      24.448578       0.000000       0.321298       0.173000       0.234600   -9999.000000       0.813000
53783     53783     shanxi         113.7000       37.6000           90       175     2012      08        11        224              0.312458      24.283905       5.448358       0.303450       0.212500   -9999.000000       0.130100       0.762000
53783     53783     shanxi         113.7000       37.6000           90       175     2012      08        12        225              0.329250      25.872681       9.598060       0.305138       0.260000   -9999.000000       0.111000       0.884000
53783     53783     shanxi         113.7000       37.6000           90       175     2012      08        13        226              0.316875      21.141846       0.236674       0.332665       0.221000       0.139900       0.207200   -9999.000000
53783     53783     shanxi         113.7000       37.6000           90       175     2012      08        14        227              0.320708      21.746796       7.150209       0.313323       0.233000   -9999.000000       0.185700       0.979000
53783     53783     shanxi         113.7000       37.6000           90       175     2012      08        15        228              0.312833      20.653290       0.000000       0.325895       0.208000   -9999.000000       0.177400       0.878000
53783     53783     shanxi         113.7000       37.6000           90       175     2012      08        16        229              0.305167      23.271332       0.000000       0.307237       0.187000       0.208700   -9999.000000       0.831000
53783     53783     shanxi         113.7000       37.6000           90       175     2012      08        17        230              0.319167      23.774689      18.111492       0.298532   -9999.000000   -9999.000000       0.166500       1.000000
53783     53783     shanxi         113.7000       37.6000           90       175     2012      08        18        231              0.326750      22.141876       2.629615       0.328908   -9999.000000   -9999.000000       0.200300   -9999.000000
53783     53783     shanxi         113.7000       37.6000           90       175     2012      08        19        232              0.315958      22.431824       0.000000       0.330910       0.233000   -9999.000000       0.177100       1.000000
53783     53783     shanxi         113.7000       37.6000           90       175     2012      08        20        233              0.309333      24.655548       0.072690       0.312043       0.228000   -9999.000000       0.161700       0.960000
53783     53783     shanxi         113.7000       37.6000           90       175     2012      08        21        234              0.301167      24.415894       0.048730       0.303488       0.197500       0.228300       0.171000       0.786000
53783     53783     shanxi         113.7000       37.6000           90       175     2012      08        22        235              0.291292      21.103424       0.000000       0.296670       0.226000   -9999.000000   -9999.000000   -9999.000000
53783     53783     shanxi         113.7000       37.6000           90       175     2012      08        23        236              0.284875      21.254791       0.000000       0.289439       0.225000       0.154800       0.142600   -9999.000000
53783     53783     shanxi         113.7000       37.6000           90       175     2012      08        24        237              0.278292      20.811798       0.000000       0.286879       0.226000   -9999.000000       0.186200       0.761000
53783     53783     shanxi         113.7000       37.6000           90       175     2012      08        25        238              0.000000      21.775208       0.000000       0.282042       0.239000   -9999.000000       0.157800       0.819000
53783     53783     shanxi         113.7000       37.6000           90       175     2012      08        26        239              0.271083      23.013275       4.350794       0.278446       0.236000   -9999.000000       0.177500       0.743000
53783     53783     shanxi         113.7000       37.6000           90       175     2012      08        27        240              0.267333      23.129944       0.000000       0.294401       0.211500   -9999.000000   -9999.000000       0.697000
53783     53783     shanxi         113.7000       37.6000           90       175     2012      08        28        241              0.256292      23.345581       0.000000       0.286306       0.196000   -9999.000000       0.147400   -9999.000000
53783     53783     shanxi         113.7000       37.6000           90       175     2012      08        29        242              0.238667      24.729156       0.000000       0.276821       0.215000       0.179600       0.134300       0.679000
53783     53783     shanxi         113.7000       37.6000           90       175     2012      08        30        243              0.223583      24.980621       0.513616       0.267507       0.230000   -9999.000000       0.161000       0.783000
53783     53783     shanxi         113.7000       37.6000           90       175     2012      08        31        244              0.216583      24.490631       0.251707       0.265470       0.218000       0.137600       0.144400       0.697000
53783     53783     shanxi         113.7000       37.6000           90       175     2012      09        01        245              0.241583      23.386749      12.523170       0.265555   -9999.000000   -9999.000000       0.159300       1.000000
53783     53783     shanxi         113.7000       37.6000           90       175     2012      09        02        246              0.261417      21.417145       0.000000       0.307647       0.209000       0.162900   -9999.000000   -9999.000000
53783     53783     shanxi         113.7000       37.6000           90       175     2012      09        03        247              0.245667      19.832123       0.246076       0.296007       0.190000       0.056200       0.102600       0.645000
53783     53783     shanxi         113.7000       37.6000           90       175     2012      09        04        248              0.232750      19.507751       3.926815       0.283420       0.156000       0.112700       0.157500       0.588000
53783     53783     shanxi         113.7000       37.6000           90       175     2012      09        05        249              0.297417      19.800110      25.140856       0.280426       0.229000       0.078200       0.148000       0.837000
53783     53783     shanxi         113.7000       37.6000           90       175     2012      09        06        250              0.325792      18.394379      20.499178       0.337474       0.214000   -9999.000000       0.152700       0.964000
53783     53783     shanxi         113.7000       37.6000           90       175     2012      09        07        251              0.309000      16.950104       0.000000       0.353059       0.207500   -9999.000000       0.146500       0.954000
53783     53783     shanxi         113.7000       37.6000           90       175     2012      09        08        252              0.302583      19.865936       0.000000       0.323956       0.206000       0.162700       0.144100       0.790000
53783     53783     shanxi         113.7000       37.6000           90       175     2012      09        09        253              0.295000      19.989929       0.000000       0.313450       0.196000   -9999.000000       0.122900       0.811000
53783     53783     shanxi         113.7000       37.6000           90       175     2012      09        10        254              0.290500      21.151489       1.562012       0.304521       0.244000   -9999.000000       0.173400       0.701000
53783     53783     shanxi         113.7000       37.6000           90       175     2012      09        11        255              0.289542      20.385101       1.236923       0.304267       0.178000   -9999.000000       0.152800   -9999.000000
53783     53783     shanxi         113.7000       37.6000           90       175     2012      09        12        256              0.278000      20.211090       0.000000       0.304714       0.166500       0.119700       0.157700       0.729000
53783     53783     shanxi         113.7000       37.6000           90       175     2012      09        13        257              0.267292      16.207611       0.000000       0.296502       0.178000   -9999.000000   -9999.000000       0.617000
53783     53783     shanxi         113.7000       37.6000           90       175     2012      09        14        258              0.258708      16.455109       0.000000       0.291606       0.156000   -9999.000000       0.141000       0.655000
53783     53783     shanxi         113.7000       37.6000           90       175     2012      09        15        259              0.253333      16.501770       0.307641       0.288010   -9999.000000   -9999.000000       0.142600       0.545000
53783     53783     shanxi         113.7000       37.6000           90       175     2012      09        16        260              0.246667      16.330475       0.000000       0.285999       0.178000       0.106200       0.164700   -9999.000000
53783     53783     shanxi         113.7000       37.6000           90       175     2012      09        17        261              0.240292      17.081940       0.000000       0.282453       0.149000       0.178800       0.125500       0.672000
53783     53783     shanxi         113.7000       37.6000           90       175     2012      09        18        262              0.236542      17.911377       0.536886       0.280561       0.187000   -9999.000000       0.134800       0.650000
53783     53783     shanxi         113.7000       37.6000           90       175     2012      09        19        263              0.232083      18.496796       0.914111       0.278342       0.162000   -9999.000000   -9999.000000       0.743000
53783     53783     shanxi         113.7000       37.6000           90       175     2012      09        20        264              0.228500      17.094635       0.000000       0.282333       0.172000       0.073200       0.109700       0.565000
53783     53783     shanxi         113.7000       37.6000           90       175     2012      09        21        265              0.256542      19.120270       5.458317       0.277591   -9999.000000   -9999.000000       0.144800   -9999.000000
53783     53783     shanxi         113.7000       37.6000           90       175     2012      09        22        266              0.262500      16.524811       0.000000       0.302784       0.179000   -9999.000000       0.129000       0.907000
53783     53783     shanxi         113.7000       37.6000           90       175     2012      09        23        267              0.253958      19.075836       0.000000       0.289072       0.174000   -9999.000000       0.133700       0.736000
53783     53783     shanxi         113.7000       37.6000           90       175     2012      09        24        268              0.245708      19.906464       0.000000       0.282795       0.179000   -9999.000000       0.141200       0.767000
53783     53783     shanxi         113.7000       37.6000           90       175     2012      09        25        269              0.241750      18.456696       2.135054       0.280143       0.199000       0.180800       0.156100       0.845000
53783     53783     shanxi         113.7000       37.6000           90       175     2012      09        26        270              0.237958      18.151550       0.000000       0.286840       0.221000       0.100600       0.110100   -9999.000000
53783     53783     shanxi         113.7000       37.6000           90       175     2012      09        27        271              0.232000      17.961945       0.000000       0.284025       0.181000   -9999.000000       0.151000       0.480000
53783     53783     shanxi         113.7000       37.6000           90       175     2012      09        28        272              0.212133      16.336121       0.000000       0.274684       0.162000   -9999.000000       0.134200       0.512000
53783     53783     shanxi         113.7000       37.6000           90       175     2012      09        29        273              0.208750      14.153015       0.000000       0.270292       0.190500   -9999.000000       0.141800       0.685000
53783     53783     shanxi         113.7000       37.6000           90       175     2012      09        30        274              0.204333      14.364410       0.000000       0.267937       0.178000   -9999.000000   -9999.000000       0.336000
53783     53783     shanxi         113.7000       37.6000           90       175     2012      10        01        275              0.201000      15.105682       0.000000       0.265750       0.135000   -9999.000000       0.093700   -9999.000000
53783     53783     shanxi         113.7000       37.6000           90       175     2012      10        02        276              0.199292      16.221405       0.132548       0.262796       0.155000   -9999.000000       0.110500       0.487000
53783     53783     shanxi         113.7000       37.6000           90       175     2012      10        03        277              0.195208      17.898224       0.000000       0.261631       0.139000   -9999.000000       0.120200       0.579000
53783     53783     shanxi         113.7000       37.6000           90       175     2012      10        04        278              0.228167      17.473907      12.311624       0.257056       0.154000       0.127600       0.110800       0.857000
53783     53783     shanxi         113.7000       37.6000           90       175     2012      10        05        279              0.250750      15.058533       0.000000       0.302552       0.158000   -9999.000000       0.127200       0.560000
53783     53783     shanxi         113.7000       37.6000           90       175     2012      10        06        280              0.243333      13.979614       0.000000       0.291772       0.157000   -9999.000000   -9999.000000       0.717000
53783     53783     shanxi         113.7000       37.6000           90       175     2012      10        07        281              0.238625      15.165710       0.000000       0.282694       0.157000   -9999.000000       0.075200       0.597000
53783     53783     shanxi         113.7000       37.6000           90       175     2012      10        08        282              0.235958      15.597534       1.604298       0.279165       0.148000       0.046500       0.116800       0.755000
53783     53783     shanxi         113.7000       37.6000           90       175     2012      10        09        283              0.227083      16.697968       0.000000       0.281450       0.133500   -9999.000000       0.103200       0.505000
53783     53783     shanxi         113.7000       37.6000           90       175     2012      10        10        284              0.219417      13.572662       0.000000       0.276936       0.155500   -9999.000000       0.115200   -9999.000000
53783     53783     shanxi         113.7000       37.6000           90       175     2012      10        11        285              0.218333      13.328735       0.000000       0.272144       0.116000   -9999.000000       0.113300       0.530000
53783     53783     shanxi         113.7000       37.6000           90       175     2012      10        12        286              0.214250      15.865570       0.000000       0.270073       0.117000   -9999.000000       0.112600       0.572000
53783     53783     shanxi         113.7000       37.6000           90       175     2012      10        13        287              0.209417      15.675049       0.000000       0.267265       0.113000       0.051200       0.092100       0.693000
53783     53783     shanxi         113.7000       37.6000           90       175     2012      10        14        288              0.206750      14.637817       0.139250       0.264246       0.103000       0.074900       0.120100       0.510000
53783     53783     shanxi         113.7000       37.6000           90       175     2012      10        15        289              0.207583      13.416077       0.425621       0.263526       0.134000   -9999.000000       0.093600   -9999.000000
53783     53783     shanxi         113.7000       37.6000           90       175     2012      10        16        290              0.204000      11.711731       0.114844       0.269833       0.125000   -9999.000000       0.097400       0.626000
53783     53783     shanxi         113.7000       37.6000           90       175     2012      10        17        291              0.198375       9.584076       0.000000       0.266809       0.118000       0.103000   -9999.000000       0.465000
53783     53783     shanxi         113.7000       37.6000           90       175     2012      10        18        292              0.199708       9.572296       0.128369       0.263132       0.119000       0.166000       0.070600       0.624000
53783     53783     shanxi         113.7000       37.6000           90       175     2012      10        19        293              0.199667      11.670349       0.000000       0.262575       0.120000       0.096300       0.099900       0.448000
53783     53783     shanxi         113.7000       37.6000           90       175     2012      10        20        294              0.200458      12.732300       0.000000       0.261118       0.115500   -9999.000000       0.087100   -9999.000000
53783     53783     shanxi         113.7000       37.6000           90       175     2012      10        21        295              0.199375      14.228088       0.436079       0.259442       0.132000       0.018600       0.092900       0.525000
53783     53783     shanxi         113.7000       37.6000           90       175     2012      10        22        296              0.198292       8.970581       0.000000       0.265718   -9999.000000   -9999.000000       0.086000       0.538000
53783     53783     shanxi         113.7000       37.6000           90       175     2012      10        23        297              0.196792       8.869202       0.000000       0.262195   -9999.000000   -9999.000000   -9999.000000       0.584000
53783     53783     shanxi         113.7000       37.6000           90       175     2012      10        24        298              0.195667      10.307739       0.000000       0.261840   -9999.000000   -9999.000000       0.056700       0.471000
53783     53783     shanxi         113.7000       37.6000           90       175     2012      10        25        299              0.000000      11.704681       0.000000       0.259955       0.096000   -9999.000000       0.085600   -9999.000000
53783     53783     shanxi         113.7000       37.6000           90       175     2012      10        26        300              0.193625      12.404877       0.110437       0.257973       0.118000       0.111600       0.075800       0.386000
53783     53783     shanxi         113.7000       37.6000           90       175     2012      10        27        301              0.194583      10.228363       0.000000       0.260375       0.112000       0.212100       0.088000       0.581000
53783     53783     shanxi         113.7000       37.6000           90       175     2012      10        28        302              0.000000      11.519440       0.600634       0.258317       0.105000   -9999.000000   -9999.000000       0.526000
53783     53783     shanxi         113.7000       37.6000           90       175     2012      10        29        303              0.191958      10.221375       0.000000       0.256907   -9999.000000   -9999.000000       0.064800       0.358000
53783     53783     shanxi         113.7000       37.6000           90       175     2012      10        30        304              0.186542       9.984680       0.000000       0.256973   -9999.000000   -9999.000000       0.063100   -9999.000000
53783     53783     shanxi         113.7000       37.6000           90       175     2012      10        31        305              0.183667       7.671509       0.000000       0.254593       0.100000   -9999.000000       0.074100       0.322000
53783     53783     shanxi         113.7000       37.6000           90       175     2012      11        01        306              0.183833       7.827545       0.000000       0.254005       0.101000   -9999.000000       0.069200   -9999.000000
53783     53783     shanxi         113.7000       37.6000           90       175     2012      11        02        307              0.182917       8.617676       0.101863       0.254283       0.104000   -9999.000000       0.077000       0.432000
53783     53783     shanxi         113.7000       37.6000           90       175     2012      11        03        308              0.181417       8.626251       0.136865       0.254737   -9999.000000   -9999.000000   -9999.000000       0.337000
53783     53783     shanxi         113.7000       37.6000           90       175     2012      11        04        309              0.178792       3.161377       0.000000       0.232460   -9999.000000   -9999.000000       0.048800       0.378000
53783     53783     shanxi         113.7000       37.6000           90       175     2012      11        05        310              0.179833       0.849152       0.000000       0.217163       0.097000   -9999.000000       0.069700       0.301000
53783     53783     shanxi         113.7000       37.6000           90       175     2012      11        06        311              0.180542       4.143555       0.000000       0.244778       0.123000   -9999.000000       0.062900       0.525000
53783     53783     shanxi         113.7000       37.6000           90       175     2012      11        07        312              0.180208       6.327362       0.114450       0.255392       0.116000   -9999.000000       0.074200       0.391000
53783     53783     shanxi         113.7000       37.6000           90       175     2012      11        08        313              0.179750       5.595093       0.000000       0.254250       0.116000   -9999.000000   -9999.000000   -9999.000000
53783     53783     shanxi         113.7000       37.6000           90       175     2012      11        09        314              0.184417       5.593689       0.406406       0.250977   -9999.000000   -9999.000000       0.081200       0.357000
53783     53783     shanxi         113.7000       37.6000           90       175     2012      11        10        315              0.230375       4.926178       0.180046       0.259507   -9999.000000   -9999.000000       0.065200       0.369000
53783     53783     shanxi         113.7000       37.6000           90       175     2012      11        11        316              0.218667       1.971771       7.058226       0.230164   -9999.000000   -9999.000000       0.068000       0.424000
53783     53783     shanxi         113.7000       37.6000           90       175     2012      11        12        317              0.218583       1.340027       0.000000       0.218590       0.108000   -9999.000000       0.061900       0.365000
53783     53783     shanxi         113.7000       37.6000           90       175     2012      11        13        318              0.000000       3.182526       0.000000       0.240887       0.107000       0.050800       0.064700   -9999.000000
53783     53783     shanxi         113.7000       37.6000           90       175     2012      11        14        319              0.210167       2.437378       0.000000       0.225928   -9999.000000       0.016200   -9999.000000       0.392000
53783     53783     shanxi         113.7000       37.6000           90       175     2012      11        15        320              0.210417       3.190216       0.275879       0.227942   -9999.000000   -9999.000000       0.057200       0.382000
53783     53783     shanxi         113.7000       37.6000           90       175     2012      11        16        321              0.208458       3.066376       0.000000       0.248729       0.095000   -9999.000000       0.055700       0.320000
53783     53783     shanxi         113.7000       37.6000           90       175     2012      11        17        322              0.000000       2.437836       0.000000       0.230548       0.113000   -9999.000000       0.067800       0.274000
53783     53783     shanxi         113.7000       37.6000           90       175     2012      11        18        323              0.205917       3.943512       0.000000       0.238559       0.108000   -9999.000000       0.061400   -9999.000000
53783     53783     shanxi         113.7000       37.6000           90       175     2012      11        19        324              0.204583       4.131714       0.000000       0.244359   -9999.000000       0.051000       0.059900       0.407000
53783     53783     shanxi         113.7000       37.6000           90       175     2012      11        20        325              0.205500       3.995483       0.000000       0.243958   -9999.000000   -9999.000000   -9999.000000       0.396000
53783     53783     shanxi         113.7000       37.6000           90       175     2012      11        21        326              0.206000       3.770844       0.000000       0.253889       0.079000       0.027100       0.028600       0.468000
53783     53783     shanxi         113.7000       37.6000           90       175     2012      11        22        327              0.203500       4.998779       0.000000       0.257993       0.103000   -9999.000000       0.060100       0.255000
53783     53783     shanxi         113.7000       37.6000           90       175     2012      11        23        328              0.197792       2.510162       0.000000       0.239743       0.099000       0.146700       0.049300   -9999.000000
53783     53783     shanxi         113.7000       37.6000           90       175     2012      11        24        329              0.193583       0.419373       0.000000       0.206099       0.099000       0.070200       0.058200       0.136000
53783     53783     shanxi         113.7000       37.6000           90       175     2012      11        25        330              0.198833       2.152954       1.899993       0.225260   -9999.000000   -9999.000000       0.058100       0.311000
53783     53783     shanxi         113.7000       37.6000           90       175     2012      11        26        331              0.193375       1.186554       0.000000       0.217904   -9999.000000   -9999.000000   -9999.000000       0.146000
53783     53783     shanxi         113.7000       37.6000           90       175     2012      11        27        332              0.192083       0.701019       0.491844       0.206747       0.088000   -9999.000000       0.035100       0.212000
53783     53783     shanxi         113.7000       37.6000           90       175     2012      11        28        333              0.190750       2.839142       0.000000       0.229644   -9999.000000       0.041100       0.052400   -9999.000000
53783     53783     shanxi         113.7000       37.6000           90       175     2012      11        29        334              0.173375      -0.925110       0.000000       0.190152       0.100000       0.059300       0.044900       0.047000
53783     53783     shanxi         113.7000       37.6000           90       175     2012      11        30        335              0.152333      -0.735138       0.000000       0.188270   -9999.000000   -9999.000000       0.048300   -9999.000000
53783     53783     shanxi         113.7000       37.6000           90       175     2012      12        01        336              0.127292      -1.867310       0.000000       0.176410   -9999.000000   -9999.000000   -9999.000000       0.148000
53783     53783     shanxi         113.7000       37.6000           90       175     2012      12        02        337              0.126417      -3.790863       0.281914       0.147647   -9999.000000   -9999.000000       0.033800       0.092000
53783     53783     shanxi         113.7000       37.6000           90       175     2012      12        03        338              0.116750      -0.618958       0.000000       0.187846   -9999.000000       0.092500       0.054700       0.146000
53783     53783     shanxi         113.7000       37.6000           90       175     2012      12        04        339              0.123458      -2.929077       0.000000       0.164799       0.095000   -9999.000000       0.048000       0.097000
53783     53783     shanxi         113.7000       37.6000           90       175     2012      12        05        340              0.111917      -0.078430       0.000000       0.196293   -9999.000000   -9999.000000       0.049400       0.150000
53783     53783     shanxi         113.7000       37.6000           90       175     2012      12        06        341              0.113125      -3.683380       0.000000       0.157626   -9999.000000       0.083800       0.056600       0.076000
53783     53783     shanxi         113.7000       37.6000           90       175     2012      12        07        342              0.107875      -1.205841       0.000000       0.180460   -9999.000000       0.054000   -9999.000000   -9999.000000
53783     53783     shanxi         113.7000       37.6000           90       175     2012      12        08        343              0.097750      -2.879303       0.000000       0.165217   -9999.000000   -9999.000000       0.020700       0.040000
53783     53783     shanxi         113.7000       37.6000           90       175     2012      12        09        344              0.100500      -4.992584       0.000000       0.146312       0.096000   -9999.000000       0.056400       0.012000
53783     53783     shanxi         113.7000       37.6000           90       175     2012      12        10        345              0.095458      -2.763824       0.000000       0.171707   -9999.000000   -9999.000000       0.034300       0.083000
53783     53783     shanxi         113.7000       37.6000           90       175     2012      12        11        346              0.091542      -4.611969       0.000000       0.157146   -9999.000000       0.188100       0.040200       0.019000
53783     53783     shanxi         113.7000       37.6000           90       175     2012      12        12        347              0.095833      -5.213440       0.000000       0.146237   -9999.000000   -9999.000000   -9999.000000   -9999.000000
53783     53783     shanxi         113.7000       37.6000           90       175     2012      12        13        348              0.097833      -3.926056       0.309410       0.152772   -9999.000000   -9999.000000       0.037400       0.104000
53783     53783     shanxi         113.7000       37.6000           90       175     2012      12        14        349              0.101625      -4.825439       0.000000       0.139870   -9999.000000   -9999.000000       0.029900       0.085000
53783     53783     shanxi         113.7000       37.6000           90       175     2012      12        15        350              0.000000      -3.211578       0.000000       0.161672       0.098000   -9999.000000       0.047200       0.102000
53783     53783     shanxi         113.7000       37.6000           90       175     2012      12        16        351              0.104667      -0.581635       0.000000       0.187968   -9999.000000       0.117600   -9999.000000       0.038000
53783     53783     shanxi         113.7000       37.6000           90       175     2012      12        17        352              0.095833      -1.737274       0.000000       0.172776   -9999.000000       0.073700       0.038800   -9999.000000
53783     53783     shanxi         113.7000       37.6000           90       175     2012      12        18        353              0.091250      -3.839539       0.000000       0.162004   -9999.000000   -9999.000000   -9999.000000       0.051000
53783     53783     shanxi         113.7000       37.6000           90       175     2012      12        19        354              0.091750      -4.026245       0.000000       0.155470   -9999.000000       0.059400       0.024500       0.088000
53783     53783     shanxi         113.7000       37.6000           90       175     2012      12        20        355              0.000000      -4.115326       0.102928       0.147926   -9999.000000       0.186900       0.047500       0.067000
53783     53783     shanxi         113.7000       37.6000           90       175     2012      12        21        356              0.094458      -4.983856       0.000000       0.139330   -9999.000000       0.040200       0.037900       0.019000
53783     53783     shanxi         113.7000       37.6000           90       175     2012      12        22        357              0.087792      -3.486603       0.000000       0.158195   -9999.000000   -9999.000000       0.041200   -9999.000000
53783     53783     shanxi         113.7000       37.6000           90       175     2012      12        23        358              0.083000      -7.625580       0.000000       0.137961   -9999.000000   -9999.000000   -9999.000000       0.092000
53783     53783     shanxi         113.7000       37.6000           90       175     2012      12        24        359              0.083952      -9.872864       0.000000       0.128242   -9999.000000   -9999.000000       0.042300       0.098000
53783     53783     shanxi         113.7000       37.6000           90       175     2012      12        25        360              0.084000      -6.399536       0.000000       0.139516   -9999.000000   -9999.000000       0.022100       0.059000
53783     53783     shanxi         113.7000       37.6000           90       175     2012      12        26        361              0.000000      -7.509491       0.000000       0.132493   -9999.000000   -9999.000000       0.045500   -9999.000000
53783     53783     shanxi         113.7000       37.6000           90       175     2012      12        27        362              0.087545      -7.224915       0.000000       0.131030   -9999.000000   -9999.000000       0.034800   -9999.000000
53783     53783     shanxi         113.7000       37.6000           90       175     2012      12        28        363              0.085000      -4.784241       0.000000       0.151938   -9999.000000   -9999.000000       0.044500       0.043000
53783     53783     shanxi         113.7000       37.6000           90       175     2012      12        29        364              0.000000      -4.290680       0.000000       0.150418   -9999.000000   -9999.000000   -9999.000000   -9999.000000
53783     53783     shanxi         113.7000       37.6000           90       175     2012      12        30        365              0.000000      -8.605438       0.000000       0.132776   -9999.000000   -9999.000000       0.039800       0.006000
53783     53783     shanxi         113.7000       37.6000           90       175     2012      12        31        366              0.086467      -6.606262       0.000000       0.132950   -9999.000000   -9999.000000       0.035200   -9999.000000
