# Supplementary material for: Research on Fusing Multisatellite Soil Moisture Data Based on Bayesian Model Averaging
Source: Hindawi journal article supplement (doi:10.1155/2018/9310838), 2018-06-25
Supplement: f1 [file 9310838.f1.zip › 2012_sm00-10cm_daily_ZDB_ZHY_53789_366days_allin.txt]

53789     53789     hebei          114.6333       37.8833           88       179     2012      01        01        001              0.000000   -9999.000000       0.000000   -9999.000000   -9999.000000   -9999.000000       0.026400   -9999.000000
53789     53789     hebei          114.6333       37.8833           88       179     2012      01        02        002              0.092167      -2.393494       0.000000       0.186730   -9999.000000   -9999.000000       0.067200       0.239000
53789     53789     hebei          114.6333       37.8833           88       179     2012      01        03        003              0.000000      -1.185699       0.000000       0.207320   -9999.000000   -9999.000000       0.069600       0.632000
53789     53789     hebei          114.6333       37.8833           88       179     2012      01        04        004              0.064833      -1.384918       0.234476       0.205549   -9999.000000   -9999.000000       0.037600   -9999.000000
53789     53789     hebei          114.6333       37.8833           88       179     2012      01        05        005              0.053958      -1.632721       0.000000       0.207910   -9999.000000   -9999.000000       0.010000       0.193000
53789     53789     hebei          114.6333       37.8833           88       179     2012      01        06        006              0.049292      -1.617462       0.000000       0.204049   -9999.000000   -9999.000000       0.082900       0.280000
53789     53789     hebei          114.6333       37.8833           88       179     2012      01        07        007              0.050292      -2.086731       0.332187       0.192975   -9999.000000   -9999.000000       0.037700       0.181000
53789     53789     hebei          114.6333       37.8833           88       179     2012      01        08        008              0.000000      -2.094238       0.000000       0.190086   -9999.000000   -9999.000000       0.067700       0.566000
53789     53789     hebei          114.6333       37.8833           88       179     2012      01        09        009              0.048167      -1.580200       0.000000       0.200760   -9999.000000   -9999.000000   -9999.000000   -9999.000000
53789     53789     hebei          114.6333       37.8833           88       179     2012      01        10        010              0.049045      -1.399994       0.000000       0.204227   -9999.000000   -9999.000000       0.010000       0.168000
53789     53789     hebei          114.6333       37.8833           88       179     2012      01        11        011              0.044250      -1.439728       0.000000       0.211969   -9999.000000   -9999.000000       0.055300       0.504000
53789     53789     hebei          114.6333       37.8833           88       179     2012      01        12        012              0.042833      -2.246033       0.483853       0.195198   -9999.000000   -9999.000000       0.024700       0.242000
53789     53789     hebei          114.6333       37.8833           88       179     2012      01        13        013              0.042458      -0.633209       0.000000       0.221973   -9999.000000       0.061800       0.036700       0.472000
53789     53789     hebei          114.6333       37.8833           88       179     2012      01        14        014              0.045625      -0.119537       0.000000       0.229215   -9999.000000   -9999.000000       0.052300   -9999.000000
53789     53789     hebei          114.6333       37.8833           88       179     2012      01        15        015              0.046167       0.055878       0.000000       0.232146   -9999.000000   -9999.000000   -9999.000000       0.416000
53789     53789     hebei          114.6333       37.8833           88       179     2012      01        16        016              0.046000      -0.228943       0.000000       0.226746   -9999.000000       0.024900       0.010000       0.424000
53789     53789     hebei          114.6333       37.8833           88       179     2012      01        17        017              0.000000      -0.896545       0.000000       0.215489   -9999.000000   -9999.000000       0.056100       0.289000
53789     53789     hebei          114.6333       37.8833           88       179     2012      01        18        018              0.052625      -0.473755       0.000000       0.218411   -9999.000000       0.102400       0.025200       0.466000
53789     53789     hebei          114.6333       37.8833           88       179     2012      01        19        019              0.055143      -0.871277       0.282773       0.205629   -9999.000000   -9999.000000       0.049000   -9999.000000
53789     53789     hebei          114.6333       37.8833           88       179     2012      01        20        020              0.000000      -0.142609       1.024673       0.224360   -9999.000000   -9999.000000       0.049000       0.406000
53789     53789     hebei          114.6333       37.8833           88       179     2012      01        21        021              0.000000      -1.076965       0.000000       0.213017   -9999.000000   -9999.000000       0.021700       0.433000
53789     53789     hebei          114.6333       37.8833           88       179     2012      01        22        022              0.039364      -3.632202       0.000000       0.181224   -9999.000000   -9999.000000       0.010000       0.488000
53789     53789     hebei          114.6333       37.8833           88       179     2012      01        23        023              0.036750      -3.094513       0.000000       0.186766   -9999.000000   -9999.000000       0.058800       0.385000
53789     53789     hebei          114.6333       37.8833           88       179     2012      01        24        024              0.035167      -2.517700       1.600767       0.193224   -9999.000000       0.050600   -9999.000000       0.161000
53789     53789     hebei          114.6333       37.8833           88       179     2012      01        25        025              0.036667      -1.906830       0.000000       0.200622   -9999.000000   -9999.000000       0.049900       0.455000
53789     53789     hebei          114.6333       37.8833           88       179     2012      01        26        026              0.039375      -0.347076       0.000000       0.224077   -9999.000000       0.064700   -9999.000000       0.297000
53789     53789     hebei          114.6333       37.8833           88       179     2012      01        27        027              0.039583       0.292572       0.000000       0.233342   -9999.000000   -9999.000000       0.010000       0.475000
53789     53789     hebei          114.6333       37.8833           88       179     2012      01        28        028              0.042333      -0.432495       0.000000       0.222690   -9999.000000   -9999.000000       0.060500   -9999.000000
53789     53789     hebei          114.6333       37.8833           88       179     2012      01        29        029              0.044167      -0.790710       0.000000       0.213969   -9999.000000   -9999.000000       0.023100       0.127000
53789     53789     hebei          114.6333       37.8833           88       179     2012      01        30        030              0.046458      -0.595490       0.000000       0.218040   -9999.000000       0.083100       0.025800       0.465000
53789     53789     hebei          114.6333       37.8833           88       179     2012      01        31        031              0.040208      -0.597839       0.000000       0.221284   -9999.000000       0.047500       0.045000       0.161000
53789     53789     hebei          114.6333       37.8833           88       179     2012      02        01        032              0.036333      -1.229980       0.000000       0.213766   -9999.000000   -9999.000000   -9999.000000       0.563000
53789     53789     hebei          114.6333       37.8833           88       179     2012      02        02        033              0.034625      -2.476837       0.000000       0.194075   -9999.000000   -9999.000000       0.010000   -9999.000000
53789     53789     hebei          114.6333       37.8833           88       179     2012      02        03        034              0.036000      -2.274536       0.000000       0.196578   -9999.000000   -9999.000000       0.050800       0.214000
53789     53789     hebei          114.6333       37.8833           88       179     2012      02        04        035              0.035292      -0.334076       0.000000       0.221647   -9999.000000   -9999.000000       0.014600       0.400000
53789     53789     hebei          114.6333       37.8833           88       179     2012      02        05        036              0.039417      -1.348389       0.000000       0.208561   -9999.000000   -9999.000000       0.041200       0.349000
53789     53789     hebei          114.6333       37.8833           88       179     2012      02        06        037              0.041500       0.298584       0.000000       0.228062   -9999.000000   -9999.000000       0.057700       0.515000
53789     53789     hebei          114.6333       37.8833           88       179     2012      02        07        038              0.035870      -0.484955       0.000000       0.222271   -9999.000000   -9999.000000       0.021300   -9999.000000
53789     53789     hebei          114.6333       37.8833           88       179     2012      02        08        039              0.036667      -1.135406       0.000000       0.211002   -9999.000000       0.024300       0.010000       0.117000
53789     53789     hebei          114.6333       37.8833           88       179     2012      02        09        040              0.039125       0.185822       0.000000       0.225259   -9999.000000   -9999.000000       0.061100       0.476000
53789     53789     hebei          114.6333       37.8833           88       179     2012      02        10        041              0.039083       0.047668       0.000000       0.226620   -9999.000000   -9999.000000       0.030000       0.388000
53789     53789     hebei          114.6333       37.8833           88       179     2012      02        11        042              0.042750       0.365631       0.000000       0.232176   -9999.000000   -9999.000000       0.050400       0.508000
53789     53789     hebei          114.6333       37.8833           88       179     2012      02        12        043              0.048542       1.471588       0.000000       0.242632   -9999.000000   -9999.000000   -9999.000000   -9999.000000
53789     53789     hebei          114.6333       37.8833           88       179     2012      02        13        044              0.046458       0.518951       0.000000       0.236448   -9999.000000       0.055400   -9999.000000       0.211000
53789     53789     hebei          114.6333       37.8833           88       179     2012      02        14        045              0.049667       1.429779       0.000000       0.250057   -9999.000000   -9999.000000       0.064800       0.414000
53789     53789     hebei          114.6333       37.8833           88       179     2012      02        15        046              0.050125       1.016052       0.000000       0.245109   -9999.000000   -9999.000000       0.020400       0.286000
53789     53789     hebei          114.6333       37.8833           88       179     2012      02        16        047              0.052000       1.557068       0.000000       0.248635   -9999.000000   -9999.000000       0.035800       0.446000
53789     53789     hebei          114.6333       37.8833           88       179     2012      02        17        048              0.049167       1.796783       0.000000       0.249658   -9999.000000   -9999.000000       0.052500   -9999.000000
53789     53789     hebei          114.6333       37.8833           88       179     2012      02        18        049              0.046417       1.290283       0.415974       0.243083       0.033000       0.042900   -9999.000000       0.357000
53789     53789     hebei          114.6333       37.8833           88       179     2012      02        19        050              0.049833       1.894836       0.000000       0.248961       0.061000   -9999.000000       0.010000       0.480000
53789     53789     hebei          114.6333       37.8833           88       179     2012      02        20        051              0.059333       2.941711       0.000000       0.258788       0.061000   -9999.000000       0.062000       0.541000
53789     53789     hebei          114.6333       37.8833           88       179     2012      02        21        052              0.074458       4.028503       0.000000       0.271650   -9999.000000   -9999.000000   -9999.000000       0.456000
53789     53789     hebei          114.6333       37.8833           88       179     2012      02        22        053              0.083667       3.293060       0.000000       0.270806   -9999.000000   -9999.000000       0.052200       0.240000
53789     53789     hebei          114.6333       37.8833           88       179     2012      02        23        054              0.093375       4.082916       0.000000       0.277736   -9999.000000       0.077400   -9999.000000       0.385000
53789     53789     hebei          114.6333       37.8833           88       179     2012      02        24        055              0.099957       3.174835       0.000000       0.267810   -9999.000000   -9999.000000       0.012600       0.496000
53789     53789     hebei          114.6333       37.8833           88       179     2012      02        25        056              0.101917       2.897186       0.000000       0.267120   -9999.000000       0.140500       0.010000       0.547000
53789     53789     hebei          114.6333       37.8833           88       179     2012      02        26        057              0.117875       2.270874       0.000000       0.260651   -9999.000000       0.062500       0.054900   -9999.000000
53789     53789     hebei          114.6333       37.8833           88       179     2012      02        27        058              0.124542       3.734528       0.000000       0.265295   -9999.000000   -9999.000000   -9999.000000       0.267000
53789     53789     hebei          114.6333       37.8833           88       179     2012      02        28        059              0.146792       4.269897       0.000000       0.274771   -9999.000000   -9999.000000       0.042400       0.526000
53789     53789     hebei          114.6333       37.8833           88       179     2012      02        29        060              0.000000   -9999.000000       0.000000   -9999.000000   -9999.000000   -9999.000000   -9999.000000   -9999.000000
53789     53789     hebei          114.6333       37.8833           88       179     2012      03        01        061              0.169375       4.903992       0.118983       0.280752   -9999.000000   -9999.000000       0.010000       0.833000
53789     53789     hebei          114.6333       37.8833           88       179     2012      03        02        062              0.172333       4.433563       0.000000       0.283121   -9999.000000       0.022100       0.044800   -9999.000000
53789     53789     hebei          114.6333       37.8833           88       179     2012      03        03        063              0.165667       3.752838       0.000000       0.278518   -9999.000000   -9999.000000       0.014800       0.340000
53789     53789     hebei          114.6333       37.8833           88       179     2012      03        04        064              0.159792       3.061066       0.000000       0.272384   -9999.000000   -9999.000000       0.029700       0.534000
53789     53789     hebei          114.6333       37.8833           88       179     2012      03        05        065              0.154917       4.087860       0.000000       0.277270   -9999.000000   -9999.000000       0.055400       0.478000
53789     53789     hebei          114.6333       37.8833           88       179     2012      03        06        066              0.151000       4.294617       0.000000       0.278642       0.071000       0.055600       0.055600       0.450000
53789     53789     hebei          114.6333       37.8833           88       179     2012      03        07        067              0.000000       6.031525       0.000000       0.279487       0.078000       0.091200       0.010000   -9999.000000
53789     53789     hebei          114.6333       37.8833           88       179     2012      03        08        068              0.145250       7.529785       0.000000       0.279576   -9999.000000   -9999.000000       0.062400       0.329000
53789     53789     hebei          114.6333       37.8833           88       179     2012      03        09        069              0.143917       3.904266       0.000000       0.272162   -9999.000000   -9999.000000       0.032300       0.659000
53789     53789     hebei          114.6333       37.8833           88       179     2012      03        10        070              0.142833       5.255737       0.000000       0.275616       0.033000   -9999.000000       0.057100       0.357000
53789     53789     hebei          114.6333       37.8833           88       179     2012      03        11        071              0.141417       6.449554       0.324288       0.265040       0.074000   -9999.000000   -9999.000000       0.559000
53789     53789     hebei          114.6333       37.8833           88       179     2012      03        12        072              0.140583       4.333160       0.000000       0.261312       0.080000   -9999.000000       0.010000   -9999.000000
53789     53789     hebei          114.6333       37.8833           88       179     2012      03        13        073              0.142542       6.162537       0.000000       0.271300       0.093000   -9999.000000       0.018400       0.367000
53789     53789     hebei          114.6333       37.8833           88       179     2012      03        14        074              0.142458       9.896423       0.000000       0.271162   -9999.000000   -9999.000000       0.062400       0.565000
53789     53789     hebei          114.6333       37.8833           88       179     2012      03        15        075              0.140375       8.929901       0.000000       0.268016   -9999.000000   -9999.000000       0.034300       0.354000
53789     53789     hebei          114.6333       37.8833           88       179     2012      03        16        076              0.142042       6.746887       0.000000       0.269657       0.080000   -9999.000000       0.057600       0.579000
53789     53789     hebei          114.6333       37.8833           88       179     2012      03        17        077              0.141833      11.614624       0.000000       0.267512       0.071000   -9999.000000   -9999.000000   -9999.000000
53789     53789     hebei          114.6333       37.8833           88       179     2012      03        18        078              0.138500      10.728516       0.190890       0.266099   -9999.000000       0.005100       0.010000       0.451000
53789     53789     hebei          114.6333       37.8833           88       179     2012      03        19        079              0.138375       4.832916       0.387539       0.269316   -9999.000000       0.129300       0.079000       0.672000
53789     53789     hebei          114.6333       37.8833           88       179     2012      03        20        080              0.138958       5.085510       0.000000       0.272721   -9999.000000   -9999.000000       0.040500       0.732000
53789     53789     hebei          114.6333       37.8833           88       179     2012      03        21        081              0.138583       7.309204       0.248060       0.271762       0.110000   -9999.000000       0.064800       0.560000
53789     53789     hebei          114.6333       37.8833           88       179     2012      03        22        082              0.146542       7.709595       0.743323       0.271632   -9999.000000   -9999.000000       0.093400       0.681000
53789     53789     hebei          114.6333       37.8833           88       179     2012      03        23        083              0.147333       5.786102       0.000000       0.281101       0.104000   -9999.000000       0.068000       0.626000
53789     53789     hebei          114.6333       37.8833           88       179     2012      03        24        084              0.144292       9.631958       0.000000       0.271799   -9999.000000   -9999.000000   -9999.000000       0.522000
53789     53789     hebei          114.6333       37.8833           88       179     2012      03        25        085              0.000000      12.920074       0.000000       0.264132   -9999.000000       0.202100       0.072300       0.605000
53789     53789     hebei          114.6333       37.8833           88       179     2012      03        26        086              0.143708      12.595154       0.000000       0.258976       0.067000   -9999.000000       0.041000   -9999.000000
53789     53789     hebei          114.6333       37.8833           88       179     2012      03        27        087              0.142250      15.206177       0.000000       0.252423       0.091000       0.039300       0.057700       0.163000
53789     53789     hebei          114.6333       37.8833           88       179     2012      03        28        088              0.141375      16.479706       0.000000       0.245237       0.091000   -9999.000000   -9999.000000       0.638000
53789     53789     hebei          114.6333       37.8833           88       179     2012      03        29        089              0.141083      17.222443       0.000000       0.240743       0.113000   -9999.000000       0.010000       0.439000
53789     53789     hebei          114.6333       37.8833           88       179     2012      03        30        090              0.136583      18.274567       0.000000       0.234846       0.115000       0.164200       0.026000       0.699000
53789     53789     hebei          114.6333       37.8833           88       179     2012      03        31        091              0.135087      13.917023       4.480849       0.229408       0.029000   -9999.000000       0.066000   -9999.000000
53789     53789     hebei          114.6333       37.8833           88       179     2012      04        01        092              0.132417      14.135437       0.000000       0.225491       0.116000   -9999.000000       0.042800       0.371000
53789     53789     hebei          114.6333       37.8833           88       179     2012      04        02        093              0.128750      12.181152       0.000000       0.225205       0.121000       0.040400       0.073000       0.605000
53789     53789     hebei          114.6333       37.8833           88       179     2012      04        03        094              0.131125       9.521912       0.000000       0.230114       0.124000   -9999.000000   -9999.000000       0.443000
53789     53789     hebei          114.6333       37.8833           88       179     2012      04        04        095              0.130875      15.413605       0.000000       0.225040   -9999.000000       0.038100       0.010000       0.618000
53789     53789     hebei          114.6333       37.8833           88       179     2012      04        05        096              0.129208      18.036804       0.000000       0.215815       0.047000   -9999.000000       0.082500   -9999.000000
53789     53789     hebei          114.6333       37.8833           88       179     2012      04        06        097              0.176042      17.879944       0.000000       0.209327       0.136000   -9999.000000       0.051000       0.486000
53789     53789     hebei          114.6333       37.8833           88       179     2012      04        07        098              0.185542      19.037781       0.000000       0.203382       0.104000       0.053000       0.071300       0.607000
53789     53789     hebei          114.6333       37.8833           88       179     2012      04        08        099              0.172167      19.338501       0.000000       0.200406       0.124000   -9999.000000       0.075100       0.534000
53789     53789     hebei          114.6333       37.8833           88       179     2012      04        09        100              0.165917      20.537140       0.000000       0.196576       0.156000   -9999.000000       0.118000       0.656000
53789     53789     hebei          114.6333       37.8833           88       179     2012      04        10        101              0.161792      21.807068       0.203423       0.194807       0.161000   -9999.000000       0.010000   -9999.000000
53789     53789     hebei          114.6333       37.8833           88       179     2012      04        11        102              0.160958      20.181915       6.944324       0.196425       0.238000   -9999.000000       0.158900       0.549000
53789     53789     hebei          114.6333       37.8833           88       179     2012      04        12        103              0.162083      18.009583       0.000000       0.234661       0.165000       0.162700       0.074000       0.627000
53789     53789     hebei          114.6333       37.8833           88       179     2012      04        13        104              0.158000      18.201904       0.000000       0.259225       0.156000   -9999.000000       0.103200       0.421000
53789     53789     hebei          114.6333       37.8833           88       179     2012      04        14        105              0.156250      21.269928       0.000000       0.235889       0.206000   -9999.000000   -9999.000000       0.531000
53789     53789     hebei          114.6333       37.8833           88       179     2012      04        15        106              0.152208      22.290192       0.000000       0.219835       0.216000       0.065500       0.010000   -9999.000000
53789     53789     hebei          114.6333       37.8833           88       179     2012      04        16        107              0.146522      22.237946       0.000000       0.207278       0.145000       0.165100       0.102600       0.412000
53789     53789     hebei          114.6333       37.8833           88       179     2012      04        17        108              0.144125      19.973724       0.000000       0.200561       0.158500       0.083300       0.056100       0.381000
53789     53789     hebei          114.6333       37.8833           88       179     2012      04        18        109              0.141917      21.914368       0.969921       0.197504       0.152000   -9999.000000   -9999.000000       0.582000
53789     53789     hebei          114.6333       37.8833           88       179     2012      04        19        110              0.139708      22.300323       0.623207       0.198585       0.231000   -9999.000000       0.101200       0.522000
53789     53789     hebei          114.6333       37.8833           88       179     2012      04        20        111              0.145625      23.383362       4.141333       0.197379   -9999.000000   -9999.000000   -9999.000000       0.389000
53789     53789     hebei          114.6333       37.8833           88       179     2012      04        21        112              0.150625      19.773621       0.000000       0.220826       0.265000   -9999.000000       0.010000       0.669000
53789     53789     hebei          114.6333       37.8833           88       179     2012      04        22        113              0.149375      18.781189       0.000000       0.248318       0.221500       0.109500       0.131700       0.648000
53789     53789     hebei          114.6333       37.8833           88       179     2012      04        23        114              0.148125      23.582764       1.593237       0.229726       0.175000   -9999.000000       0.090300       0.724000
53789     53789     hebei          114.6333       37.8833           88       179     2012      04        24        115              0.212375      23.887878       4.786621       0.225775       0.373000   -9999.000000       0.181900   -9999.000000
53789     53789     hebei          114.6333       37.8833           88       179     2012      04        25        116              0.000000      17.073975       0.000000       0.282233       0.341000       0.219500       0.155100       0.714000
53789     53789     hebei          114.6333       37.8833           88       179     2012      04        26        117              0.163458      18.937286       0.000000       0.251534       0.203500   -9999.000000       0.083900       0.578000
53789     53789     hebei          114.6333       37.8833           88       179     2012      04        27        118              0.155375      22.520905       0.000000       0.232968       0.139000   -9999.000000   -9999.000000       0.533000
53789     53789     hebei          114.6333       37.8833           88       179     2012      04        28        119              0.144875      23.504547       0.000000       0.215361       0.157000   -9999.000000       0.134000       0.719000
53789     53789     hebei          114.6333       37.8833           88       179     2012      04        29        120              0.139667      20.582672       0.000000       0.204340       0.165000       0.157000       0.073300   -9999.000000
53789     53789     hebei          114.6333       37.8833           88       179     2012      04        30        121              0.138333      21.159424       0.000000       0.197942       0.260000       0.199700       0.110800       0.452000
53789     53789     hebei          114.6333       37.8833           88       179     2012      05        01        122              0.137125      24.981262       0.000000       0.194055       0.281000   -9999.000000   -9999.000000       0.576000
53789     53789     hebei          114.6333       37.8833           88       179     2012      05        02        123              0.132833      25.353607       0.000000       0.192574       0.204000       0.145400       0.010000       0.400000
53789     53789     hebei          114.6333       37.8833           88       179     2012      05        03        124              0.125667      27.738831       0.000000       0.187117       0.169000   -9999.000000       0.143700       0.657000
53789     53789     hebei          114.6333       37.8833           88       179     2012      05        04        125              0.118708      28.785675       0.574803       0.182410       0.169000   -9999.000000       0.074200   -9999.000000
53789     53789     hebei          114.6333       37.8833           88       179     2012      05        05        126              0.111833      29.643097       0.000000       0.180338       0.281000   -9999.000000       0.097200       0.408000
53789     53789     hebei          114.6333       37.8833           88       179     2012      05        06        127              0.106958      28.688019       0.000000       0.178821       0.264000   -9999.000000       0.128800       0.512000
53789     53789     hebei          114.6333       37.8833           88       179     2012      05        07        128              0.100750      31.260223       0.000000       0.178016   -9999.000000       0.315800   -9999.000000       0.372000
53789     53789     hebei          114.6333       37.8833           88       179     2012      05        08        129              0.093292      28.352753       0.000000       0.178480       0.214000       0.158400       0.010000       0.662000
53789     53789     hebei          114.6333       37.8833           88       179     2012      05        09        130              0.088375      28.681396       0.571790       0.176885       0.234000   -9999.000000       0.135800   -9999.000000
53789     53789     hebei          114.6333       37.8833           88       179     2012      05        10        131              0.085750      25.937500       0.000000       0.181716       0.253500   -9999.000000       0.086000       0.440000
53789     53789     hebei          114.6333       37.8833           88       179     2012      05        11        132              0.104875      29.711395      12.880592       0.179276       0.395000   -9999.000000       0.117200       1.000000
53789     53789     hebei          114.6333       37.8833           88       179     2012      05        12        133              0.148625      24.087891       0.175741       0.243765       0.283000   -9999.000000       0.146500       0.706000
53789     53789     hebei          114.6333       37.8833           88       179     2012      05        13        134              0.136167      22.621185       0.000000       0.273006       0.209500       0.145900       0.069000       0.661000
53789     53789     hebei          114.6333       37.8833           88       179     2012      05        14        135              0.124000      23.549042       0.000000       0.247742       0.163000   -9999.000000       0.017500   -9999.000000
53789     53789     hebei          114.6333       37.8833           88       179     2012      05        15        136              0.109542      24.363647       0.000000       0.225391       0.168000   -9999.000000       0.153400       0.473000
53789     53789     hebei          114.6333       37.8833           88       179     2012      05        16        137              0.095125      24.873962       0.000000       0.206901       0.245000   -9999.000000       0.093600       0.458000
53789     53789     hebei          114.6333       37.8833           88       179     2012      05        17        138              0.086625      26.268799       0.000000       0.194220       0.241000   -9999.000000       0.127200       0.499000
53789     53789     hebei          114.6333       37.8833           88       179     2012      05        18        139              0.084625      29.314484       0.000000       0.185818       0.197500       0.061700   -9999.000000       0.601000
53789     53789     hebei          114.6333       37.8833           88       179     2012      05        19        140              0.085042      30.218842       0.445443       0.183617       0.153000   -9999.000000       0.010000       0.320000
53789     53789     hebei          114.6333       37.8833           88       179     2012      05        20        141              0.080667      30.218994       0.406260       0.184180       0.169000       0.220900       0.157300       0.602000
53789     53789     hebei          114.6333       37.8833           88       179     2012      05        21        142              0.071348      26.751801       0.000000       0.185856       0.190000       0.153800       0.094200       0.483000
53789     53789     hebei          114.6333       37.8833           88       179     2012      05        22        143              0.067792      25.397247       0.000000       0.185234       0.201000   -9999.000000       0.105900       0.594000
53789     53789     hebei          114.6333       37.8833           88       179     2012      05        23        144              0.065792      27.933472       0.265241       0.180373   -9999.000000       0.111100       0.145500   -9999.000000
53789     53789     hebei          114.6333       37.8833           88       179     2012      05        24        145              0.060333      27.214691       0.484738       0.177134       0.119000   -9999.000000       0.149100       0.431000
53789     53789     hebei          114.6333       37.8833           88       179     2012      05        25        146              0.000000      28.878052       3.211139       0.174856   -9999.000000   -9999.000000       0.010000       0.737000
53789     53789     hebei          114.6333       37.8833           88       179     2012      05        26        147              0.056083      26.992188       0.000000       0.208873       0.197000   -9999.000000       0.159900       0.592000
53789     53789     hebei          114.6333       37.8833           88       179     2012      05        27        148              0.052708      29.435822       0.000000       0.193577       0.177000   -9999.000000       0.098600       0.779000
53789     53789     hebei          114.6333       37.8833           88       179     2012      05        28        149              0.047292      32.302063       0.000000       0.178289       0.100500       0.125900       0.143300   -9999.000000
53789     53789     hebei          114.6333       37.8833           88       179     2012      05        29        150              0.042375      31.542938       0.000000       0.175835       0.152500   -9999.000000   -9999.000000       0.512000
53789     53789     hebei          114.6333       37.8833           88       179     2012      05        30        151              0.039333      27.878510       0.000000       0.176002       0.119000   -9999.000000       0.069500   -9999.000000
53789     53789     hebei          114.6333       37.8833           88       179     2012      05        31        152              0.036750      29.443878       8.223425       0.172866       0.198500       0.060300   -9999.000000   -9999.000000
53789     53789     hebei          114.6333       37.8833           88       179     2012      06        01        153              0.037917      26.561737       1.756354       0.226059       0.168000   -9999.000000       0.180400       0.842000
53789     53789     hebei          114.6333       37.8833           88       179     2012      06        02        154              0.038375      25.719238       0.000000       0.257379       0.151000   -9999.000000       0.106700   -9999.000000
53789     53789     hebei          114.6333       37.8833           88       179     2012      06        03        155              0.039125      26.675323       2.139053       0.233887       0.150500   -9999.000000       0.166900       0.697000
53789     53789     hebei          114.6333       37.8833           88       179     2012      06        04        156              0.041292      25.639923       0.000000       0.219493       0.094000       0.225200   -9999.000000       0.619000
53789     53789     hebei          114.6333       37.8833           88       179     2012      06        05        157              0.040083      30.698700       0.000000       0.196297       0.108000       0.233400       0.010000       0.644000
53789     53789     hebei          114.6333       37.8833           88       179     2012      06        06        158              0.038833      32.335175       0.000000       0.183889       0.162000   -9999.000000       0.134700       0.678000
53789     53789     hebei          114.6333       37.8833           88       179     2012      06        07        159              0.039333      30.744629       6.559105       0.181093       0.164000       0.322800       0.106200   -9999.000000
53789     53789     hebei          114.6333       37.8833           88       179     2012      06        08        160              0.039875      29.516907       0.000000       0.237897       0.129500       0.164500       0.099500       0.698000
53789     53789     hebei          114.6333       37.8833           88       179     2012      06        09        161              0.039292      30.260101       0.230787       0.221778       0.095000   -9999.000000       0.113300       0.624000
53789     53789     hebei          114.6333       37.8833           88       179     2012      06        10        162              0.036957      32.587646       0.000000       0.196555       0.110000       0.096800       0.131100       0.597000
53789     53789     hebei          114.6333       37.8833           88       179     2012      06        11        163              0.000000      28.880676       0.000000       0.186775       0.092000   -9999.000000       0.010000       0.633000
53789     53789     hebei          114.6333       37.8833           88       179     2012      06        12        164              0.033000      31.862671       0.000000       0.178494       0.096000       0.190800       0.110600   -9999.000000
53789     53789     hebei          114.6333       37.8833           88       179     2012      06        13        165              0.031292      33.065399       1.531751       0.175754       0.073500   -9999.000000       0.065300       0.586000
53789     53789     hebei          114.6333       37.8833           88       179     2012      06        14        166              0.033238      31.171906       0.158026       0.185921       0.069000   -9999.000000       0.108400       0.626000
53789     53789     hebei          114.6333       37.8833           88       179     2012      06        15        167              0.031167      30.040131       0.000000       0.183960       0.076000       0.162300   -9999.000000       0.658000
53789     53789     hebei          114.6333       37.8833           88       179     2012      06        16        168              0.030583      31.315552       0.000000       0.175677       0.118000   -9999.000000       0.028300       0.638000
53789     53789     hebei          114.6333       37.8833           88       179     2012      06        17        169              0.029458      34.035431       0.000000       0.172751       0.125000   -9999.000000       0.068100       0.608000
53789     53789     hebei          114.6333       37.8833           88       179     2012      06        18        170              0.026875      35.978577       0.000000       0.171689       0.072500       0.087800       0.083800       0.705000
53789     53789     hebei          114.6333       37.8833           88       179     2012      06        19        171              0.024417      35.472504       0.000000       0.171774       0.102500   -9999.000000       0.074700       0.625000
53789     53789     hebei          114.6333       37.8833           88       179     2012      06        20        172              0.020667      35.955017      20.627253       0.171272       0.097000   -9999.000000       0.091800       0.725000
53789     53789     hebei          114.6333       37.8833           88       179     2012      06        21        173              0.112875      32.440155       2.396011       0.172551       0.122000   -9999.000000   -9999.000000   -9999.000000
53789     53789     hebei          114.6333       37.8833           88       179     2012      06        22        174              0.148292      31.977875       0.090603       0.192461       0.129000   -9999.000000       0.010000       0.684000
53789     53789     hebei          114.6333       37.8833           88       179     2012      06        23        175              0.135042      33.042969       0.000000       0.187400       0.087500       0.343900       0.092100       0.739000
53789     53789     hebei          114.6333       37.8833           88       179     2012      06        24        176              0.178708      33.060791      20.882578       0.178483       0.159000   -9999.000000       0.082500       0.735000
53789     53789     hebei          114.6333       37.8833           88       179     2012      06        25        177              0.176792      26.585846       0.550530       0.311138       0.135000   -9999.000000       0.114100       1.000000
53789     53789     hebei          114.6333       37.8833           88       179     2012      06        26        178              0.167250      28.183411       0.656912       0.289361       0.151000       0.249300       0.107400   -9999.000000
53789     53789     hebei          114.6333       37.8833           88       179     2012      06        27        179              0.164458      28.185333       0.223131       0.273546       0.141000       0.219500       0.089200       0.859000
53789     53789     hebei          114.6333       37.8833           88       179     2012      06        28        180              0.189000      28.491882      32.198887       0.252204   -9999.000000       0.124900       0.036600       1.000000
53789     53789     hebei          114.6333       37.8833           88       179     2012      06        29        181              0.238833      25.453644       8.864658       0.318496       0.142000   -9999.000000       0.105400       1.000000
53789     53789     hebei          114.6333       37.8833           88       179     2012      06        30        182              0.201833      25.556824       0.000000       0.359416       0.126000   -9999.000000       0.084200   -9999.000000
53789     53789     hebei          114.6333       37.8833           88       179     2012      07        01        183              0.183542      29.682373       0.000000       0.323170       0.156000       0.177000       0.099400   -9999.000000
53789     53789     hebei          114.6333       37.8833           88       179     2012      07        02        184              0.167458      32.129700       0.000000       0.301160       0.171000   -9999.000000   -9999.000000       0.754000
53789     53789     hebei          114.6333       37.8833           88       179     2012      07        03        185              0.155792      31.155487       1.039956       0.282080       0.165000       0.264500       0.010000       0.777000
53789     53789     hebei          114.6333       37.8833           88       179     2012      07        04        186              0.209708      32.592285      53.021099       0.272307       0.074000   -9999.000000       0.100100   -9999.000000
53789     53789     hebei          114.6333       37.8833           88       179     2012      07        05        187              0.232167      29.170441       0.000000       0.376271       0.162000   -9999.000000       0.101300       0.953000
53789     53789     hebei          114.6333       37.8833           88       179     2012      07        06        188              0.208458      29.135864       0.000000       0.359010   -9999.000000       0.211000       0.069400   -9999.000000
53789     53789     hebei          114.6333       37.8833           88       179     2012      07        07        189              0.200667      30.338074       2.682388       0.327886   -9999.000000   -9999.000000       0.081800       0.936000
53789     53789     hebei          114.6333       37.8833           88       179     2012      07        08        190              0.214042      28.817169       9.119245       0.328209       0.217000   -9999.000000   -9999.000000       1.000000
53789     53789     hebei          114.6333       37.8833           88       179     2012      07        09        191              0.260583      29.087189      23.587997       0.337451       0.146500       0.138100       0.010000       1.000000
53789     53789     hebei          114.6333       37.8833           88       179     2012      07        10        192              0.242375      27.605286       9.720405       0.375005       0.173500   -9999.000000       0.116300       0.963000
53789     53789     hebei          114.6333       37.8833           88       179     2012      07        11        193              0.223750      29.518860       0.000000       0.369586       0.167000       0.147600       0.075500   -9999.000000
53789     53789     hebei          114.6333       37.8833           88       179     2012      07        12        194              0.233208      31.595581       4.918665       0.346598       0.166000   -9999.000000       0.084100       0.869000
53789     53789     hebei          114.6333       37.8833           88       179     2012      07        13        195              0.234792      30.524994       0.000000       0.341837       0.233000   -9999.000000       0.108700       0.877000
53789     53789     hebei          114.6333       37.8833           88       179     2012      07        14        196              0.224292      27.199371       4.174010       0.336954       0.257000       0.204100       0.099100       0.937000
53789     53789     hebei          114.6333       37.8833           88       179     2012      07        15        197              0.216667      27.463684       0.000000       0.340481       0.168500   -9999.000000       0.010000       0.773000
53789     53789     hebei          114.6333       37.8833           88       179     2012      07        16        198              0.208667      28.990082       0.000000       0.324869       0.132000       0.107900       0.122300       0.794000
53789     53789     hebei          114.6333       37.8833           88       179     2012      07        17        199              0.203667      29.532928       0.000000       0.313455       0.141000   -9999.000000       0.069400       0.763000
53789     53789     hebei          114.6333       37.8833           88       179     2012      07        18        200              0.198083      29.623566       0.000000       0.304799       0.208000   -9999.000000       0.101400       0.857000
53789     53789     hebei          114.6333       37.8833           88       179     2012      07        19        201              0.193083      30.198853       0.000000       0.297905       0.188000       0.151900   -9999.000000       0.885000
53789     53789     hebei          114.6333       37.8833           88       179     2012      07        20        202              0.189609      31.122986       0.115113       0.289402       0.112000   -9999.000000       0.010000   -9999.000000
53789     53789     hebei          114.6333       37.8833           88       179     2012      07        21        203              0.194500      31.523285       3.911850       0.283519       0.285000       0.139500       0.119800       0.754000
53789     53789     hebei          114.6333       37.8833           88       179     2012      07        22        204              0.195250      29.998322       0.000000       0.303823       0.176000   -9999.000000       0.059700       0.784000
53789     53789     hebei          114.6333       37.8833           88       179     2012      07        23        205              0.189750      30.810822       0.000000       0.285195       0.199000       0.189400       0.082700       0.853000
53789     53789     hebei          114.6333       37.8833           88       179     2012      07        24        206              0.185333      31.283386       0.232830       0.271092   -9999.000000       0.133900       0.107500       0.909000
53789     53789     hebei          114.6333       37.8833           88       179     2012      07        25        207              0.219000      30.471680      12.687441       0.267620       0.249000   -9999.000000   -9999.000000   -9999.000000
53789     53789     hebei          114.6333       37.8833           88       179     2012      07        26        208              0.260250      31.457977      16.132778       0.313516       0.306500       0.270600       0.010000       1.000000
53789     53789     hebei          114.6333       37.8833           88       179     2012      07        27        209              0.241333      29.781738       0.433594       0.348141       0.234000   -9999.000000       0.154600       0.949000
53789     53789     hebei          114.6333       37.8833           88       179     2012      07        28        210              0.229417      29.241852       0.000000       0.331564       0.206000       0.359700       0.088200       0.969000
53789     53789     hebei          114.6333       37.8833           88       179     2012      07        29        211              0.218417      32.271667       4.617760       0.315522       0.309000       0.146500       0.113900       0.862000
53789     53789     hebei          114.6333       37.8833           88       179     2012      07        30        212              0.215917      32.935760      19.258219       0.308548       0.468000   -9999.000000   -9999.000000   -9999.000000
53789     53789     hebei          114.6333       37.8833           88       179     2012      07        31        213              0.273250      26.639496      23.426109       0.352428       0.339500   -9999.000000       0.095600       1.000000
53789     53789     hebei          114.6333       37.8833           88       179     2012      08        01        214              0.246417      23.442810       1.801543       0.385981       0.415000   -9999.000000       0.045600       1.000000
53789     53789     hebei          114.6333       37.8833           88       179     2012      08        02        215              0.235250      25.165192       0.000000       0.361894       0.313000   -9999.000000       0.140600       0.933000
53789     53789     hebei          114.6333       37.8833           88       179     2012      08        03        216              0.227750      28.144806       0.000000       0.346658       0.432000       0.156600       0.090500       0.860000
53789     53789     hebei          114.6333       37.8833           88       179     2012      08        04        217              0.220875      28.150238       3.007058       0.338577       0.457000   -9999.000000       0.114400   -9999.000000
53789     53789     hebei          114.6333       37.8833           88       179     2012      08        05        218              0.215667      30.067871       0.714575       0.328087       0.242000       0.172700   -9999.000000       0.784000
53789     53789     hebei          114.6333       37.8833           88       179     2012      08        06        219              0.214542      28.804718       0.286334       0.323979       0.375000       0.147000       0.010000       0.731000
53789     53789     hebei          114.6333       37.8833           88       179     2012      08        07        220              0.213083      29.944244       0.000000       0.317749       0.268000   -9999.000000   -9999.000000       0.742000
53789     53789     hebei          114.6333       37.8833           88       179     2012      08        08        221              0.215000      31.292877       4.648745       0.309314       0.322000   -9999.000000       0.086000       0.905000
53789     53789     hebei          114.6333       37.8833           88       179     2012      08        09        222              0.218833      30.306610       8.070640       0.321424       0.472000   -9999.000000       0.104700   -9999.000000
53789     53789     hebei          114.6333       37.8833           88       179     2012      08        10        223              0.210583      30.501190       0.000000       0.310034       0.447000   -9999.000000       0.135200       0.610000
53789     53789     hebei          114.6333       37.8833           88       179     2012      08        11        224              0.245792      30.495087      73.243698       0.299018       0.216000   -9999.000000       0.194600       1.000000
53789     53789     hebei          114.6333       37.8833           88       179     2012      08        12        225              0.265708      28.798004       0.236075       0.400053       0.310000   -9999.000000       0.010000       0.910000
53789     53789     hebei          114.6333       37.8833           88       179     2012      08        13        226              0.244292      25.921112       0.051872       0.387317       0.298000   -9999.000000       0.217000       0.769000
53789     53789     hebei          114.6333       37.8833           88       179     2012      08        14        227              0.252542      27.068390       4.652224       0.358087       0.458000   -9999.000000       0.121300       0.746000
53789     53789     hebei          114.6333       37.8833           88       179     2012      08        15        228              0.241043      22.957336       0.000000       0.360212       0.438000   -9999.000000       0.165200       0.776000
53789     53789     hebei          114.6333       37.8833           88       179     2012      08        16        229              0.230250      26.952850       0.169733       0.347191       0.403000       0.065800   -9999.000000       0.758000
53789     53789     hebei          114.6333       37.8833           88       179     2012      08        17        230              0.233583      28.020508       5.725967       0.338298       0.273000   -9999.000000       0.090100       1.000000
53789     53789     hebei          114.6333       37.8833           88       179     2012      08        18        231              0.256458      26.731110       2.733568       0.345984   -9999.000000   -9999.000000       0.103500   -9999.000000
53789     53789     hebei          114.6333       37.8833           88       179     2012      08        19        232              0.241875      26.476318       0.000000       0.352613       0.290000   -9999.000000       0.207900       0.839000
53789     53789     hebei          114.6333       37.8833           88       179     2012      08        20        233              0.238696      28.903961      20.504663       0.338701       0.392000       0.201200       0.109500       0.726000
53789     53789     hebei          114.6333       37.8833           88       179     2012      08        21        234              0.240792      28.683716       1.716813       0.364549       0.446000       0.124900       0.153100       0.786000
53789     53789     hebei          114.6333       37.8833           88       179     2012      08        22        235              0.228375      25.515411       0.000000       0.360425       0.320500   -9999.000000   -9999.000000   -9999.000000
53789     53789     hebei          114.6333       37.8833           88       179     2012      08        23        236              0.219333      25.451569       0.000000       0.342477       0.242000       0.220900       0.010000   -9999.000000
53789     53789     hebei          114.6333       37.8833           88       179     2012      08        24        237              0.212375      24.944305       0.000000       0.335303       0.237000   -9999.000000       0.175100       0.757000
53789     53789     hebei          114.6333       37.8833           88       179     2012      08        25        238              0.000000      25.558105       0.000000       0.327930       0.368000       0.303500       0.095700       0.670000
53789     53789     hebei          114.6333       37.8833           88       179     2012      08        26        239              0.205000      26.511169       0.000000       0.322444       0.395000       0.180300       0.148900       0.733000
53789     53789     hebei          114.6333       37.8833           88       179     2012      08        27        240              0.203167      27.401093       0.000000       0.318063       0.263500   -9999.000000       0.161900       0.730000
53789     53789     hebei          114.6333       37.8833           88       179     2012      08        28        241              0.199417      27.971344       0.000000       0.314503       0.304500       0.281300       0.166900   -9999.000000
53789     53789     hebei          114.6333       37.8833           88       179     2012      08        29        242              0.195417      28.681641       0.000000       0.307918       0.230000   -9999.000000       0.010000       0.668000
53789     53789     hebei          114.6333       37.8833           88       179     2012      08        30        243              0.190708      29.223572       0.000000       0.299528       0.343500   -9999.000000       0.180200       0.704000
53789     53789     hebei          114.6333       37.8833           88       179     2012      08        31        244              0.186833      29.865509       0.000000       0.294785       0.420000       0.127800       0.099200       0.733000
53789     53789     hebei          114.6333       37.8833           88       179     2012      09        01        245              0.242500      29.358032      31.173843       0.292222       0.405000       0.179400       0.185200       0.982000
53789     53789     hebei          114.6333       37.8833           88       179     2012      09        02        246              0.251208      26.425598       0.172374       0.367182       0.305500       0.217600   -9999.000000   -9999.000000
53789     53789     hebei          114.6333       37.8833           88       179     2012      09        03        247              0.228833      24.798492       0.000000       0.352172       0.219000       0.114600       0.010000       0.746000
53789     53789     hebei          114.6333       37.8833           88       179     2012      09        04        248              0.216875      24.098663       0.569588       0.334997       0.219000   -9999.000000       0.120600       0.679000
53789     53789     hebei          114.6333       37.8833           88       179     2012      09        05        249              0.261542      23.215912      14.922156       0.326259   -9999.000000   -9999.000000       0.244800       0.772000
53789     53789     hebei          114.6333       37.8833           88       179     2012      09        06        250              0.273833      21.787048      33.755772       0.347902       0.426000   -9999.000000       0.184500       1.000000
53789     53789     hebei          114.6333       37.8833           88       179     2012      09        07        251              0.248833      20.133972       0.000000       0.394347       0.299000       0.409400       0.210100   -9999.000000
53789     53789     hebei          114.6333       37.8833           88       179     2012      09        08        252              0.239250      23.093933       0.000000       0.367593       0.228000       0.184100   -9999.000000       0.817000
53789     53789     hebei          114.6333       37.8833           88       179     2012      09        09        253              0.231625      23.579987       0.000000       0.356682       0.218000   -9999.000000       0.010000       0.738000
53789     53789     hebei          114.6333       37.8833           88       179     2012      09        10        254              0.229261      25.206085       0.747980       0.348363   -9999.000000       0.384300       0.275400       0.782000
53789     53789     hebei          114.6333       37.8833           88       179     2012      09        11        255              0.225333      25.132477       0.000000       0.343803       0.240000   -9999.000000       0.137600       0.729000
53789     53789     hebei          114.6333       37.8833           88       179     2012      09        12        256              0.217292      24.488586       0.000000       0.339604       0.222000   -9999.000000       0.204200       0.690000
53789     53789     hebei          114.6333       37.8833           88       179     2012      09        13        257              0.242417      21.330933       0.203801       0.332369       0.181000   -9999.000000       0.216400       0.626000
53789     53789     hebei          114.6333       37.8833           88       179     2012      09        14        258              0.241167      21.802490       0.000000       0.327169       0.140000   -9999.000000       0.229200       0.819000
53789     53789     hebei          114.6333       37.8833           88       179     2012      09        15        259              0.237292      21.752258       0.000000       0.323116   -9999.000000       0.200900       0.010000       0.764000
53789     53789     hebei          114.6333       37.8833           88       179     2012      09        16        260              0.233333      22.133972       0.000000       0.319189       0.256000       0.060900       0.251600   -9999.000000
53789     53789     hebei          114.6333       37.8833           88       179     2012      09        17        261              0.232542      22.174042       0.000000       0.315648       0.246000   -9999.000000       0.113600       0.604000
53789     53789     hebei          114.6333       37.8833           88       179     2012      09        18        262              0.230208      22.949249       0.000000       0.312474       0.178500       0.114700       0.154000       0.683000
53789     53789     hebei          114.6333       37.8833           88       179     2012      09        19        263              0.228667      23.661499       3.161978       0.309045       0.143000   -9999.000000   -9999.000000       0.790000
53789     53789     hebei          114.6333       37.8833           88       179     2012      09        20        264              0.223208      23.747559       0.204601       0.305887       0.148000   -9999.000000       0.010000       0.837000
53789     53789     hebei          114.6333       37.8833           88       179     2012      09        21        265              0.216083      23.998596       1.006974       0.303022   -9999.000000       0.063000       0.195700   -9999.000000
53789     53789     hebei          114.6333       37.8833           88       179     2012      09        22        266              0.216500      21.545685       0.000000       0.310973       0.187000   -9999.000000       0.096700       0.700000
53789     53789     hebei          114.6333       37.8833           88       179     2012      09        23        267              0.214500      23.796143       0.000000       0.304624       0.104000   -9999.000000       0.119000       0.773000
53789     53789     hebei          114.6333       37.8833           88       179     2012      09        24        268              0.213542      24.436737       0.000000       0.300532       0.141500   -9999.000000       0.126000       0.750000
53789     53789     hebei          114.6333       37.8833           88       179     2012      09        25        269              0.233417      24.217560      38.367657       0.297843       0.128000   -9999.000000   -9999.000000       1.000000
53789     53789     hebei          114.6333       37.8833           88       179     2012      09        26        270              0.249375      22.616547       0.000000       0.359774       0.173500       0.116000       0.010000   -9999.000000
53789     53789     hebei          114.6333       37.8833           88       179     2012      09        27        271              0.243857      22.386139       0.000000       0.357378       0.188000   -9999.000000       0.147500       0.840000
53789     53789     hebei          114.6333       37.8833           88       179     2012      09        28        272              0.221357      20.583130       0.000000       0.343025       0.115500   -9999.000000       0.099400       0.743000
53789     53789     hebei          114.6333       37.8833           88       179     2012      09        29        273              0.217292      18.896301       0.000000       0.334642       0.132000   -9999.000000       0.136400       0.752000
53789     53789     hebei          114.6333       37.8833           88       179     2012      09        30        274              0.210375      19.276611       0.000000       0.330013       0.120000   -9999.000000       0.159300       0.734000
53789     53789     hebei          114.6333       37.8833           88       179     2012      10        01        275              0.206000      19.613342       0.000000       0.326176       0.103000   -9999.000000       0.049000   -9999.000000
53789     53789     hebei          114.6333       37.8833           88       179     2012      10        02        276              0.203667      20.590668       0.000000       0.322223       0.133000   -9999.000000       0.010000       0.679000
53789     53789     hebei          114.6333       37.8833           88       179     2012      10        03        277              0.200417      21.526428       0.000000       0.318972       0.128000       0.282900       0.097200       0.646000
53789     53789     hebei          114.6333       37.8833           88       179     2012      10        04        278              0.197250      21.583282       1.693593       0.315460       0.104500       0.048500       0.076200       0.546000
53789     53789     hebei          114.6333       37.8833           88       179     2012      10        05        279              0.195167      19.047089       0.000000       0.320165       0.110500       0.240700       0.078400       0.639000
53789     53789     hebei          114.6333       37.8833           88       179     2012      10        06        280              0.192333      19.671997       0.000000       0.315521       0.092000   -9999.000000   -9999.000000   -9999.000000
53789     53789     hebei          114.6333       37.8833           88       179     2012      10        07        281              0.192667      20.392700       0.000000       0.312422       0.138000   -9999.000000       0.010000       0.530000
53789     53789     hebei          114.6333       37.8833           88       179     2012      10        08        282              0.191750      20.390228       0.191265       0.310473       0.127000   -9999.000000       0.083100       0.610000
53789     53789     hebei          114.6333       37.8833           88       179     2012      10        09        283              0.187500      21.233978       0.000000       0.308936       0.116000       0.205200       0.038800       0.725000
53789     53789     hebei          114.6333       37.8833           88       179     2012      10        10        284              0.180167      19.246155       0.000000       0.304576       0.100000   -9999.000000       0.052500       0.596000
53789     53789     hebei          114.6333       37.8833           88       179     2012      10        11        285              0.176083      17.905426       0.000000       0.302156       0.075000   -9999.000000       0.072300       0.451000
53789     53789     hebei          114.6333       37.8833           88       179     2012      10        12        286              0.173875      18.289429       0.049242       0.301037       0.079000   -9999.000000       0.075600       0.503000
53789     53789     hebei          114.6333       37.8833           88       179     2012      10        13        287              0.169500      19.579987       0.000000       0.300257       0.115000       0.271100       0.010000       0.496000
53789     53789     hebei          114.6333       37.8833           88       179     2012      10        14        288              0.162542      18.098663       0.000000       0.297677       0.111000       0.171000       0.084800       0.746000
53789     53789     hebei          114.6333       37.8833           88       179     2012      10        15        289              0.162292      16.836853       1.454045       0.295924       0.099500   -9999.000000       0.041600   -9999.000000
53789     53789     hebei          114.6333       37.8833           88       179     2012      10        16        290              0.160375      15.809540       0.118055       0.300629       0.075000   -9999.000000       0.064600       0.640000
53789     53789     hebei          114.6333       37.8833           88       179     2012      10        17        291              0.155042      14.796692       0.000000       0.303464       0.079000       0.120600   -9999.000000       0.610000
53789     53789     hebei          114.6333       37.8833           88       179     2012      10        18        292              0.151833      14.748169       0.000000       0.298183       0.121000       0.391300       0.020400       0.548000
53789     53789     hebei          114.6333       37.8833           88       179     2012      10        19        293              0.148625      15.499237       0.000000       0.296415       0.116000       0.148700       0.029600       0.771000
53789     53789     hebei          114.6333       37.8833           88       179     2012      10        20        294              0.146417      16.116455       0.187879       0.294959       0.071500   -9999.000000       0.093700   -9999.000000
53789     53789     hebei          114.6333       37.8833           88       179     2012      10        21        295              0.142083      17.446960       2.444770       0.294211       0.134000       0.259500       0.061600       0.549000
53789     53789     hebei          114.6333       37.8833           88       179     2012      10        22        296              0.140208      13.470734       0.000000       0.308477   -9999.000000   -9999.000000       0.068900       0.657000
53789     53789     hebei          114.6333       37.8833           88       179     2012      10        23        297              0.141875      14.441986       0.000000       0.301189   -9999.000000   -9999.000000   -9999.000000       0.588000
53789     53789     hebei          114.6333       37.8833           88       179     2012      10        24        298              0.136792      15.261505       0.000000       0.298468   -9999.000000       0.057200       0.010000       0.682000
53789     53789     hebei          114.6333       37.8833           88       179     2012      10        25        299              0.000000      16.480133       0.000000       0.296613       0.090500   -9999.000000       0.086800   -9999.000000
53789     53789     hebei          114.6333       37.8833           88       179     2012      10        26        300              0.132667      16.836914       0.303277       0.294824       0.101000   -9999.000000       0.035800       0.477000
53789     53789     hebei          114.6333       37.8833           88       179     2012      10        27        301              0.130583      16.253021       0.000000       0.296381       0.085000       0.132200       0.069000       0.714000
53789     53789     hebei          114.6333       37.8833           88       179     2012      10        28        302              0.000000      16.845764       0.000000       0.294406       0.095000   -9999.000000       0.069500       0.514000
53789     53789     hebei          114.6333       37.8833           88       179     2012      10        29        303              0.127792      14.343109       0.000000       0.292119   -9999.000000   -9999.000000       0.078100       0.601000
53789     53789     hebei          114.6333       37.8833           88       179     2012      10        30        304              0.123542      13.499481       0.000000       0.292304   -9999.000000   -9999.000000       0.010000   -9999.000000
53789     53789     hebei          114.6333       37.8833           88       179     2012      10        31        305              0.120750      12.011200       0.000000       0.290541       0.057000       0.262400       0.086000       0.513000
53789     53789     hebei          114.6333       37.8833           88       179     2012      11        01        306              0.119542      11.278107       0.046844       0.288992       0.091000       0.125400       0.030400       0.652000
53789     53789     hebei          114.6333       37.8833           88       179     2012      11        02        307              0.118875      11.843475       0.155611       0.289490       0.099000   -9999.000000       0.070400       0.416000
53789     53789     hebei          114.6333       37.8833           88       179     2012      11        03        308              0.137625      11.671204      27.335922       0.289694   -9999.000000   -9999.000000   -9999.000000       1.000000
53789     53789     hebei          114.6333       37.8833           88       179     2012      11        04        309              0.179917       8.459106       0.531791       0.355550   -9999.000000   -9999.000000       0.010000   -9999.000000
53789     53789     hebei          114.6333       37.8833           88       179     2012      11        05        310              0.177208       5.774231       0.630374       0.356763       0.037000   -9999.000000       0.104500       0.657000
53789     53789     hebei          114.6333       37.8833           88       179     2012      11        06        311              0.174042       8.918823       0.049147       0.338412       0.113000       0.223000       0.118700       0.727000
53789     53789     hebei          114.6333       37.8833           88       179     2012      11        07        312              0.172833       9.935089       0.000000       0.332194   -9999.000000   -9999.000000       0.064300       0.751000
53789     53789     hebei          114.6333       37.8833           88       179     2012      11        08        313              0.170208       9.863403       0.000000       0.328677   -9999.000000   -9999.000000   -9999.000000       0.648000
53789     53789     hebei          114.6333       37.8833           88       179     2012      11        09        314              0.171000       9.703094       7.752223       0.325344   -9999.000000   -9999.000000   -9999.000000       0.508000
53789     53789     hebei          114.6333       37.8833           88       179     2012      11        10        315              0.228792       9.777344      11.531530       0.333898   -9999.000000   -9999.000000       0.010000       0.901000
53789     53789     hebei          114.6333       37.8833           88       179     2012      11        11        316              0.215375       7.001923       0.000000       0.367335   -9999.000000   -9999.000000       0.098200       0.736000
53789     53789     hebei          114.6333       37.8833           88       179     2012      11        12        317              0.205417       6.063324       0.000000       0.346633   -9999.000000   -9999.000000       0.049700       0.798000
53789     53789     hebei          114.6333       37.8833           88       179     2012      11        13        318              0.000000       6.904205       0.000000       0.340514   -9999.000000       0.159700       0.081800   -9999.000000
53789     53789     hebei          114.6333       37.8833           88       179     2012      11        14        319              0.192833       6.057129       0.000000       0.336262   -9999.000000       0.086800       0.097500       0.491000
53789     53789     hebei          114.6333       37.8833           88       179     2012      11        15        320              0.193417       5.645020       4.324695       0.333365   -9999.000000   -9999.000000       0.053300       1.000000
53789     53789     hebei          114.6333       37.8833           88       179     2012      11        16        321              0.197083       5.399048       0.983787       0.339785   -9999.000000       0.145500       0.010000       0.891000
53789     53789     hebei          114.6333       37.8833           88       179     2012      11        17        322              0.000000       6.346680       0.000000       0.340395       0.123000   -9999.000000       0.102000       0.777000
53789     53789     hebei          114.6333       37.8833           88       179     2012      11        18        323              0.191250       6.910095       0.000000       0.335088   -9999.000000   -9999.000000       0.042200   -9999.000000
53789     53789     hebei          114.6333       37.8833           88       179     2012      11        19        324              0.188750       6.938843       0.000000       0.332818   -9999.000000       0.286200       0.091100       0.561000
53789     53789     hebei          114.6333       37.8833           88       179     2012      11        20        325              0.187000       6.267365       0.000000       0.330481   -9999.000000   -9999.000000   -9999.000000       0.660000
53789     53789     hebei          114.6333       37.8833           88       179     2012      11        21        326              0.185667       5.790649       0.000000       0.329604   -9999.000000   -9999.000000       0.010000       0.638000
53789     53789     hebei          114.6333       37.8833           88       179     2012      11        22        327              0.182917       5.963013       0.000000       0.328654   -9999.000000   -9999.000000       0.091300       0.724000
53789     53789     hebei          114.6333       37.8833           88       179     2012      11        23        328              0.179500       4.655640       0.000000       0.327900   -9999.000000   -9999.000000       0.027100   -9999.000000
53789     53789     hebei          114.6333       37.8833           88       179     2012      11        24        329              0.177667       3.633209       0.000000       0.319090   -9999.000000       0.132300       0.049100       0.442000
53789     53789     hebei          114.6333       37.8833           88       179     2012      11        25        330              0.176250       4.288971       0.000000       0.323288   -9999.000000   -9999.000000       0.089500       0.669000
53789     53789     hebei          114.6333       37.8833           88       179     2012      11        26        331              0.174625       3.842773       0.000000       0.323442   -9999.000000   -9999.000000   -9999.000000       0.606000
53789     53789     hebei          114.6333       37.8833           88       179     2012      11        27        332              0.173375       3.921814       0.292317       0.318599   -9999.000000   -9999.000000       0.010000       0.621000
53789     53789     hebei          114.6333       37.8833           88       179     2012      11        28        333              0.169833       4.638092       0.000000       0.321528   -9999.000000   -9999.000000       0.097700   -9999.000000
53789     53789     hebei          114.6333       37.8833           88       179     2012      11        29        334              0.166500       3.489563       0.000000       0.314660   -9999.000000       0.116400       0.035600       0.539000
53789     53789     hebei          114.6333       37.8833           88       179     2012      11        30        335              0.164667       2.626129       0.000000       0.304029   -9999.000000   -9999.000000       0.077400       0.585000
53789     53789     hebei          114.6333       37.8833           88       179     2012      12        01        336              0.161625       1.217804       0.175598       0.272871   -9999.000000       0.159900   -9999.000000       0.310000
53789     53789     hebei          114.6333       37.8833           88       179     2012      12        02        337              0.157087      -0.310791       0.000000       0.231848   -9999.000000       0.131000       0.024700       0.494000
53789     53789     hebei          114.6333       37.8833           88       179     2012      12        03        338              0.156208      -0.358734       1.060377       0.212796   -9999.000000   -9999.000000       0.010000   -9999.000000
53789     53789     hebei          114.6333       37.8833           88       179     2012      12        04        339              0.153500       0.662567       0.000000       0.254439   -9999.000000       0.101700       0.098900       0.453000
53789     53789     hebei          114.6333       37.8833           88       179     2012      12        05        340              0.150500       0.816315       0.000000       0.262771   -9999.000000   -9999.000000       0.037500       0.588000
53789     53789     hebei          114.6333       37.8833           88       179     2012      12        06        341              0.139250       0.299377       0.000000       0.250773   -9999.000000       0.225200       0.073600       0.616000
53789     53789     hebei          114.6333       37.8833           88       179     2012      12        07        342              0.122167      -1.022400       0.000000       0.207679   -9999.000000       0.160300   -9999.000000       0.412000
53789     53789     hebei          114.6333       37.8833           88       179     2012      12        08        343              0.098167      -0.582825       0.000000       0.218384   -9999.000000   -9999.000000       0.077900       0.228000
53789     53789     hebei          114.6333       37.8833           88       179     2012      12        09        344              0.075792      -1.355560       0.000000       0.203616   -9999.000000   -9999.000000       0.093100       0.501000
53789     53789     hebei          114.6333       37.8833           88       179     2012      12        10        345              0.075667      -0.312988       0.000000       0.224177   -9999.000000   -9999.000000       0.010000       0.387000
53789     53789     hebei          114.6333       37.8833           88       179     2012      12        11        346              0.087000      -0.591888       0.000000       0.215933   -9999.000000       0.173400       0.052200       0.675000
53789     53789     hebei          114.6333       37.8833           88       179     2012      12        12        347              0.105333      -0.427521       0.000000       0.214752   -9999.000000       0.044300       0.062800   -9999.000000
53789     53789     hebei          114.6333       37.8833           88       179     2012      12        13        348              0.120417      -0.268250       9.976398       0.219502   -9999.000000   -9999.000000       0.066900       0.155000
53789     53789     hebei          114.6333       37.8833           88       179     2012      12        14        349              0.139583       0.316864       1.386872       0.233166   -9999.000000   -9999.000000       0.010000       0.790000
53789     53789     hebei          114.6333       37.8833           88       179     2012      12        15        350              0.000000       0.208496       0.649083       0.230404   -9999.000000   -9999.000000       0.104200       0.609000
53789     53789     hebei          114.6333       37.8833           88       179     2012      12        16        351              0.164292       0.178253       0.735038       0.240880   -9999.000000   -9999.000000   -9999.000000       1.000000
53789     53789     hebei          114.6333       37.8833           88       179     2012      12        17        352              0.170833       0.440979       0.000000       0.256389   -9999.000000   -9999.000000       0.059000   -9999.000000
53789     53789     hebei          114.6333       37.8833           88       179     2012      12        18        353              0.164500       0.485107       0.000000       0.260159   -9999.000000   -9999.000000   -9999.000000       0.453000
53789     53789     hebei          114.6333       37.8833           88       179     2012      12        19        354              0.159125      -0.187103       0.000000       0.230312   -9999.000000   -9999.000000       0.010000       0.545000
53789     53789     hebei          114.6333       37.8833           88       179     2012      12        20        355              0.000000      -0.748657       1.377924       0.209721   -9999.000000       0.116300       0.028300       0.450000
53789     53789     hebei          114.6333       37.8833           88       179     2012      12        21        356              0.142318      -1.153473       0.053135       0.196727   -9999.000000   -9999.000000       0.099000       0.673000
53789     53789     hebei          114.6333       37.8833           88       179     2012      12        22        357              0.117958      -1.296417       0.000000       0.197992   -9999.000000   -9999.000000       0.034800   -9999.000000
53789     53789     hebei          114.6333       37.8833           88       179     2012      12        23        358              0.066750      -2.619415       0.000000       0.192428   -9999.000000   -9999.000000   -9999.000000       0.322000
53789     53789     hebei          114.6333       37.8833           88       179     2012      12        24        359              0.049444      -4.622772       0.000000       0.165894   -9999.000000       0.212400   -9999.000000       0.519000
53789     53789     hebei          114.6333       37.8833           88       179     2012      12        25        360              0.045042      -3.733582       0.000000       0.173883   -9999.000000       0.063100       0.066100       0.429000
53789     53789     hebei          114.6333       37.8833           88       179     2012      12        26        361              0.000000      -4.723907       0.000000       0.165761   -9999.000000   -9999.000000       0.082300       0.410000
53789     53789     hebei          114.6333       37.8833           88       179     2012      12        27        362              0.040500      -4.490997       0.000000       0.165386   -9999.000000   -9999.000000       0.017400   -9999.000000
53789     53789     hebei          114.6333       37.8833           88       179     2012      12        28        363              0.044000      -3.780273       0.424228       0.168434   -9999.000000       0.039900       0.058700       0.376000
53789     53789     hebei          114.6333       37.8833           88       179     2012      12        29        364              0.000000      -3.979248       0.000000       0.165042   -9999.000000       0.111100   -9999.000000   -9999.000000
53789     53789     hebei          114.6333       37.8833           88       179     2012      12        30        365              0.000000      -3.413483       0.000000       0.172460   -9999.000000       0.034600       0.032000       0.184000
53789     53789     hebei          114.6333       37.8833           88       179     2012      12        31        366              0.043333      -1.879028       3.370583       0.197698   -9999.000000   -9999.000000       0.010000   -9999.000000
