# Supplementary material for: Research on Fusing Multisatellite Soil Moisture Data Based on Bayesian Model Averaging
Source: Hindawi journal article supplement (doi:10.1155/2018/9310838), 2018-06-25
Supplement: f1 [file 9310838.f1.zip › 2012_sm00-10cm_daily_ZDB_ZHY_53791_366days_allin.txt]

53791     53791     hebei          114.5167       37.7667           89       178     2012      01        01        001              0.000000   -9999.000000       0.000000   -9999.000000   -9999.000000   -9999.000000       0.014100   -9999.000000
53791     53791     hebei          114.5167       37.7667           89       178     2012      01        02        002              0.169792      -2.882843       0.458992       0.148758   -9999.000000   -9999.000000       0.029900       0.254000
53791     53791     hebei          114.5167       37.7667           89       178     2012      01        03        003              0.000000      -1.957001       1.981317       0.161524       0.089000   -9999.000000       0.027300       0.007000
53791     53791     hebei          114.5167       37.7667           89       178     2012      01        04        004              0.145375      -1.239197       0.995831       0.177084   -9999.000000   -9999.000000       0.010000   -9999.000000
53791     53791     hebei          114.5167       37.7667           89       178     2012      01        05        005              0.132083      -2.009308       0.614342       0.178399   -9999.000000   -9999.000000       0.010000       0.419000
53791     53791     hebei          114.5167       37.7667           89       178     2012      01        06        006              0.115958      -2.078186       0.000000       0.170448   -9999.000000   -9999.000000       0.031600       0.046000
53791     53791     hebei          114.5167       37.7667           89       178     2012      01        07        007              0.109458      -2.111603       0.296735       0.162803   -9999.000000   -9999.000000       0.014200       0.284000
53791     53791     hebei          114.5167       37.7667           89       178     2012      01        08        008              0.000000      -2.112885       0.000000       0.159458   -9999.000000   -9999.000000       0.026900       0.045000
53791     53791     hebei          114.5167       37.7667           89       178     2012      01        09        009              0.107708      -2.006073       0.000000       0.166256   -9999.000000   -9999.000000   -9999.000000   -9999.000000
53791     53791     hebei          114.5167       37.7667           89       178     2012      01        10        010              0.110250      -1.588959       0.000000       0.175048   -9999.000000   -9999.000000       0.010000       0.223000
53791     53791     hebei          114.5167       37.7667           89       178     2012      01        11        011              0.104208      -1.780762       0.000000       0.173755   -9999.000000   -9999.000000       0.029800       0.072000
53791     53791     hebei          114.5167       37.7667           89       178     2012      01        12        012              0.099125      -2.295990       0.000000       0.168059   -9999.000000   -9999.000000       0.010000       0.217000
53791     53791     hebei          114.5167       37.7667           89       178     2012      01        13        013              0.098250      -0.623810       0.000000       0.189878   -9999.000000   -9999.000000       0.016300       0.102000
53791     53791     hebei          114.5167       37.7667           89       178     2012      01        14        014              0.100250      -0.134125       0.000000       0.194623   -9999.000000   -9999.000000       0.025400   -9999.000000
53791     53791     hebei          114.5167       37.7667           89       178     2012      01        15        015              0.102458       0.189972       0.000000       0.199099   -9999.000000   -9999.000000   -9999.000000       0.011000
53791     53791     hebei          114.5167       37.7667           89       178     2012      01        16        016              0.102500      -0.420685       0.000000       0.190718   -9999.000000       0.034900       0.010000       0.136000
53791     53791     hebei          114.5167       37.7667           89       178     2012      01        17        017              0.000000      -0.977203       0.000000       0.183586   -9999.000000   -9999.000000       0.032400       0.338000
53791     53791     hebei          114.5167       37.7667           89       178     2012      01        18        018              0.108583      -0.504669       0.000000       0.185518   -9999.000000   -9999.000000       0.015000       0.194000
53791     53791     hebei          114.5167       37.7667           89       178     2012      01        19        019              0.117833      -0.917633       1.580067       0.173571   -9999.000000   -9999.000000       0.030400   -9999.000000
53791     53791     hebei          114.5167       37.7667           89       178     2012      01        20        020              0.129043       0.029633       0.353815       0.194674   -9999.000000   -9999.000000   -9999.000000       0.112000
53791     53791     hebei          114.5167       37.7667           89       178     2012      01        21        021              0.000000      -1.683197       0.000000       0.170811   -9999.000000   -9999.000000       0.010000       0.225000
53791     53791     hebei          114.5167       37.7667           89       178     2012      01        22        022              0.093545      -4.391205       0.000000       0.146015   -9999.000000   -9999.000000       0.010000       0.051000
53791     53791     hebei          114.5167       37.7667           89       178     2012      01        23        023              0.086750      -3.434265       0.000000       0.156799   -9999.000000   -9999.000000       0.030000       0.039000
53791     53791     hebei          114.5167       37.7667           89       178     2012      01        24        024              0.084625      -2.174438       0.761753       0.168912   -9999.000000   -9999.000000   -9999.000000       0.207000
53791     53791     hebei          114.5167       37.7667           89       178     2012      01        25        025              0.086125      -1.710541       0.794465       0.176235       0.095000   -9999.000000       0.024800       0.041000
53791     53791     hebei          114.5167       37.7667           89       178     2012      01        26        026              0.088583      -0.159332       0.000000       0.194452   -9999.000000       0.034600   -9999.000000       0.289000
53791     53791     hebei          114.5167       37.7667           89       178     2012      01        27        027              0.089125       0.462067       0.000000       0.202403   -9999.000000   -9999.000000       0.010000       0.032000
53791     53791     hebei          114.5167       37.7667           89       178     2012      01        28        028              0.091583      -0.358887       0.000000       0.192775   -9999.000000   -9999.000000       0.028500   -9999.000000
53791     53791     hebei          114.5167       37.7667           89       178     2012      01        29        029              0.100875      -0.573761       0.000000       0.184943   -9999.000000   -9999.000000       0.010100       0.222000
53791     53791     hebei          114.5167       37.7667           89       178     2012      01        30        030              0.106917      -0.674072       0.000000       0.183136       0.091000   -9999.000000       0.014300       0.029000
53791     53791     hebei          114.5167       37.7667           89       178     2012      01        31        031              0.097958      -0.470428       0.000000       0.190749   -9999.000000   -9999.000000       0.021900       0.309000
53791     53791     hebei          114.5167       37.7667           89       178     2012      02        01        032              0.088292      -1.612823       0.000000       0.177066   -9999.000000   -9999.000000   -9999.000000       0.019000
53791     53791     hebei          114.5167       37.7667           89       178     2012      02        02        033              0.084292      -3.037415       0.000000       0.160412   -9999.000000   -9999.000000       0.010000   -9999.000000
53791     53791     hebei          114.5167       37.7667           89       178     2012      02        03        034              0.085292      -2.438293       0.000000       0.167069       0.081000   -9999.000000       0.026200       0.409000
53791     53791     hebei          114.5167       37.7667           89       178     2012      02        04        035              0.083625      -0.354156       0.000000       0.190069   -9999.000000   -9999.000000       0.010000       0.129000
53791     53791     hebei          114.5167       37.7667           89       178     2012      02        05        036              0.086391      -2.128845       0.000000       0.166135       0.089000   -9999.000000       0.021500       0.377000
53791     53791     hebei          114.5167       37.7667           89       178     2012      02        06        037              0.088458       0.304535       0.000000       0.196373   -9999.000000   -9999.000000   -9999.000000       0.061000
53791     53791     hebei          114.5167       37.7667           89       178     2012      02        07        038              0.084292      -0.110321       3.105040       0.194661       0.033000   -9999.000000       0.010000   -9999.000000
53791     53791     hebei          114.5167       37.7667           89       178     2012      02        08        039              0.084261      -0.670868       0.170146       0.183110       0.083000   -9999.000000       0.010000       0.298000
53791     53791     hebei          114.5167       37.7667           89       178     2012      02        09        040              0.086042       0.530243       0.000000       0.197769   -9999.000000   -9999.000000       0.032800       0.190000
53791     53791     hebei          114.5167       37.7667           89       178     2012      02        10        041              0.086333      -0.009064       0.000000       0.195538       0.088000   -9999.000000       0.015400       0.397000
53791     53791     hebei          114.5167       37.7667           89       178     2012      02        11        042              0.088958       0.182343       0.000000       0.197229   -9999.000000   -9999.000000       0.030000       0.013000
53791     53791     hebei          114.5167       37.7667           89       178     2012      02        12        043              0.095625       1.700897       0.000000       0.210861   -9999.000000   -9999.000000   -9999.000000   -9999.000000
53791     53791     hebei          114.5167       37.7667           89       178     2012      02        13        044              0.095750       0.444214       0.000000       0.202988   -9999.000000       0.027700   -9999.000000       0.056000
53791     53791     hebei          114.5167       37.7667           89       178     2012      02        14        045              0.099958       1.399261       0.000000       0.215612   -9999.000000   -9999.000000       0.033600       0.178000
53791     53791     hebei          114.5167       37.7667           89       178     2012      02        15        046              0.097417       0.721619       0.000000       0.209151       0.073000   -9999.000000       0.010000       0.435000
53791     53791     hebei          114.5167       37.7667           89       178     2012      02        16        047              0.099292       1.690002       0.000000       0.215809   -9999.000000   -9999.000000       0.015200       0.186000
53791     53791     hebei          114.5167       37.7667           89       178     2012      02        17        048              0.095208       2.027649       0.000000       0.216059   -9999.000000   -9999.000000       0.026600   -9999.000000
53791     53791     hebei          114.5167       37.7667           89       178     2012      02        18        049              0.092958       1.344177       0.628135       0.207385       0.056000   -9999.000000       0.028800       0.091000
53791     53791     hebei          114.5167       37.7667           89       178     2012      02        19        050              0.095625       1.984741       0.000000       0.212405       0.075000   -9999.000000       0.010000       0.193000
53791     53791     hebei          114.5167       37.7667           89       178     2012      02        20        051              0.102542       3.061584       0.000000       0.223174       0.075000   -9999.000000       0.030600       0.112000
53791     53791     hebei          114.5167       37.7667           89       178     2012      02        21        052              0.114083       4.036255       0.000000       0.237708   -9999.000000   -9999.000000   -9999.000000       0.024000
53791     53791     hebei          114.5167       37.7667           89       178     2012      02        22        053              0.121833       3.385834       0.000000       0.233931   -9999.000000   -9999.000000       0.030300       0.352000
53791     53791     hebei          114.5167       37.7667           89       178     2012      02        23        054              0.130000       4.392120       0.000000       0.245298       0.036000       0.026400   -9999.000000       0.124000
53791     53791     hebei          114.5167       37.7667           89       178     2012      02        24        055              0.141217       3.272278       0.000000       0.233567       0.077000   -9999.000000       0.010000       0.365000
53791     53791     hebei          114.5167       37.7667           89       178     2012      02        25        056              0.150750       2.858307       0.000000       0.232937   -9999.000000       0.032700       0.010000       0.092000
53791     53791     hebei          114.5167       37.7667           89       178     2012      02        26        057              0.159958       2.153534       0.000000       0.225595       0.085000   -9999.000000       0.032400   -9999.000000
53791     53791     hebei          114.5167       37.7667           89       178     2012      02        27        058              0.168667       3.714478       0.000000       0.229766   -9999.000000   -9999.000000   -9999.000000       0.440000
53791     53791     hebei          114.5167       37.7667           89       178     2012      02        28        059              0.182565       4.355865       0.000000       0.239815       0.045000   -9999.000000       0.023100       0.157000
53791     53791     hebei          114.5167       37.7667           89       178     2012      02        29        060              0.000000   -9999.000000       0.000000   -9999.000000       0.084000   -9999.000000   -9999.000000   -9999.000000
53791     53791     hebei          114.5167       37.7667           89       178     2012      03        01        061              0.205667       4.844849       0.947424       0.247119       0.089000       0.164200       0.010000       0.478000
53791     53791     hebei          114.5167       37.7667           89       178     2012      03        02        062              0.215333       3.990936       0.088368       0.256523       0.105000       0.025200       0.028300   -9999.000000
53791     53791     hebei          114.5167       37.7667           89       178     2012      03        03        063              0.219583       3.308929       0.049621       0.252493   -9999.000000   -9999.000000       0.010000       0.584000
53791     53791     hebei          114.5167       37.7667           89       178     2012      03        04        064              0.220750       2.977173       0.000000       0.243458   -9999.000000   -9999.000000       0.031000       0.157000
53791     53791     hebei          114.5167       37.7667           89       178     2012      03        05        065              0.218917       3.670654       0.259186       0.249112       0.089000   -9999.000000       0.037300       0.275000
53791     53791     hebei          114.5167       37.7667           89       178     2012      03        06        066              0.217833       4.211609       0.000000       0.255291       0.094000   -9999.000000       0.033400       0.142000
53791     53791     hebei          114.5167       37.7667           89       178     2012      03        07        067              0.000000       6.615234       0.000000       0.253886       0.091000       0.044400       0.010000   -9999.000000
53791     53791     hebei          114.5167       37.7667           89       178     2012      03        08        068              0.215750       7.782562       0.000000       0.253148   -9999.000000   -9999.000000       0.034700       0.408000
53791     53791     hebei          114.5167       37.7667           89       178     2012      03        09        069              0.213208       4.210449       0.000000       0.244960   -9999.000000   -9999.000000       0.016200       0.295000
53791     53791     hebei          114.5167       37.7667           89       178     2012      03        10        070              0.210792       5.093384       0.000000       0.245233       0.055000   -9999.000000       0.030800       0.442000
53791     53791     hebei          114.5167       37.7667           89       178     2012      03        11        071              0.208000       6.358551       0.000000       0.237544       0.089000   -9999.000000   -9999.000000       0.072000
53791     53791     hebei          114.5167       37.7667           89       178     2012      03        12        072              0.206500       4.498199       0.000000       0.230800       0.091000   -9999.000000       0.010000   -9999.000000
53791     53791     hebei          114.5167       37.7667           89       178     2012      03        13        073              0.206333       6.296326       0.000000       0.242079   -9999.000000   -9999.000000       0.010000       0.194000
53791     53791     hebei          114.5167       37.7667           89       178     2012      03        14        074              0.205417      10.348419       0.000000       0.244608   -9999.000000       0.095800       0.033700       0.231000
53791     53791     hebei          114.5167       37.7667           89       178     2012      03        15        075              0.202667       8.979065       0.000000       0.241526       0.062500   -9999.000000       0.019200       0.325000
53791     53791     hebei          114.5167       37.7667           89       178     2012      03        16        076              0.205083       6.599121       0.000000       0.243797       0.087000   -9999.000000       0.029300       0.070000
53791     53791     hebei          114.5167       37.7667           89       178     2012      03        17        077              0.205583      11.722534       0.072690       0.242242       0.081000   -9999.000000   -9999.000000   -9999.000000
53791     53791     hebei          114.5167       37.7667           89       178     2012      03        18        078              0.201500      11.723785       1.527927       0.240205       0.095000   -9999.000000       0.010000       0.151000
53791     53791     hebei          114.5167       37.7667           89       178     2012      03        19        079              0.200167       4.671844       0.088929       0.245318   -9999.000000       0.040800       0.045400       0.413000
53791     53791     hebei          114.5167       37.7667           89       178     2012      03        20        080              0.200417       4.073975       0.000000       0.260496       0.079000   -9999.000000       0.021100       0.210000
53791     53791     hebei          114.5167       37.7667           89       178     2012      03        21        081              0.199500       7.205261       1.572105       0.255265       0.121000   -9999.000000       0.036400       0.164000
53791     53791     hebei          114.5167       37.7667           89       178     2012      03        22        082              0.210250       7.235718       3.347762       0.257407   -9999.000000   -9999.000000       0.053200       0.815000
53791     53791     hebei          114.5167       37.7667           89       178     2012      03        23        083              0.212583       5.666962       0.177998       0.284213       0.117000   -9999.000000       0.039900       0.316000
53791     53791     hebei          114.5167       37.7667           89       178     2012      03        24        084              0.212458       9.860657       0.000000       0.267210   -9999.000000   -9999.000000   -9999.000000       0.563000
53791     53791     hebei          114.5167       37.7667           89       178     2012      03        25        085              0.000000      13.000549       0.000000       0.256216   -9999.000000       0.019700       0.037500       0.254000
53791     53791     hebei          114.5167       37.7667           89       178     2012      03        26        086              0.212542      12.500549       0.000000       0.250576       0.082000   -9999.000000       0.017000   -9999.000000
53791     53791     hebei          114.5167       37.7667           89       178     2012      03        27        087              0.212333      15.149750       0.000000       0.244145       0.095000       0.219600       0.030600       0.340000
53791     53791     hebei          114.5167       37.7667           89       178     2012      03        28        088              0.212417      16.481445       0.000000       0.236932       0.095000       0.071600   -9999.000000       0.323000
53791     53791     hebei          114.5167       37.7667           89       178     2012      03        29        089              0.214417      17.145905       0.000000       0.232908       0.088000       0.082300       0.010000       0.477000
53791     53791     hebei          114.5167       37.7667           89       178     2012      03        30        090              0.210000      18.410797       0.000000       0.227257       0.085000       0.001000       0.030800       0.197000
53791     53791     hebei          114.5167       37.7667           89       178     2012      03        31        091              0.208167      14.053436       0.000000       0.222470       0.068000   -9999.000000       0.033000   -9999.000000
53791     53791     hebei          114.5167       37.7667           89       178     2012      04        01        092              0.204917      14.705994       0.000000       0.218130       0.111500   -9999.000000       0.013300       0.528000
53791     53791     hebei          114.5167       37.7667           89       178     2012      04        02        093              0.200750      12.359772       0.000000       0.217723       0.114000   -9999.000000       0.036300       0.299000
53791     53791     hebei          114.5167       37.7667           89       178     2012      04        03        094              0.202417       9.780975       0.000000       0.222325       0.122000   -9999.000000   -9999.000000       0.432000
53791     53791     hebei          114.5167       37.7667           89       178     2012      04        04        095              0.204750      15.828522       0.000000       0.216101   -9999.000000   -9999.000000       0.010000       0.268000
53791     53791     hebei          114.5167       37.7667           89       178     2012      04        05        096              0.204083      18.311493       0.000000       0.206418       0.080500   -9999.000000       0.041400   -9999.000000
53791     53791     hebei          114.5167       37.7667           89       178     2012      04        06        097              0.205417      18.083588       0.000000       0.199804       0.111000   -9999.000000       0.018100       0.559000
53791     53791     hebei          114.5167       37.7667           89       178     2012      04        07        098              0.204167      19.507599       0.000000       0.193213       0.106000       0.033600       0.037300       0.453000
53791     53791     hebei          114.5167       37.7667           89       178     2012      04        08        099              0.204167      19.995331       0.000000       0.188840       0.110000   -9999.000000       0.035600       0.491000
53791     53791     hebei          114.5167       37.7667           89       178     2012      04        09        100              0.203667      20.691589       0.000000       0.184775       0.108000   -9999.000000       0.040600       0.175000
53791     53791     hebei          114.5167       37.7667           89       178     2012      04        10        101              0.203917      21.707703       5.242974       0.182932       0.124000   -9999.000000       0.010000   -9999.000000
53791     53791     hebei          114.5167       37.7667           89       178     2012      04        11        102              0.201478      20.148224       4.971194       0.184856       0.177000   -9999.000000       0.060900       0.407000
53791     53791     hebei          114.5167       37.7667           89       178     2012      04        12        103              0.201042      17.735626       0.000000       0.213394       0.162000       0.072200       0.024900       0.337000
53791     53791     hebei          114.5167       37.7667           89       178     2012      04        13        104              0.205542      18.732758       1.137466       0.231002       0.138000   -9999.000000       0.039200       0.302000
53791     53791     hebei          114.5167       37.7667           89       178     2012      04        14        105              0.211917      21.365570       0.000000       0.211959       0.135000       0.158300   -9999.000000       0.135000
53791     53791     hebei          114.5167       37.7667           89       178     2012      04        15        106              0.214750      22.717468       0.000000       0.197722       0.151000       0.094500       0.010000   -9999.000000
53791     53791     hebei          114.5167       37.7667           89       178     2012      04        16        107              0.214174      22.640137       0.000000       0.187663       0.120500   -9999.000000       0.047500       0.203000
53791     53791     hebei          114.5167       37.7667           89       178     2012      04        17        108              0.212333      19.720551       0.000000       0.183158       0.145500       0.054500       0.024900       0.563000
53791     53791     hebei          114.5167       37.7667           89       178     2012      04        18        109              0.212167      22.187653       0.933203       0.179896       0.153000   -9999.000000   -9999.000000       0.258000
53791     53791     hebei          114.5167       37.7667           89       178     2012      04        19        110              0.211042      22.839874       0.000000       0.178062       0.128000   -9999.000000       0.044900       0.095000
53791     53791     hebei          114.5167       37.7667           89       178     2012      04        20        111              0.206833      23.884857       0.776674       0.177018       0.173000       0.085800   -9999.000000       0.376000
53791     53791     hebei          114.5167       37.7667           89       178     2012      04        21        112              0.203833      20.003845       0.000000       0.186421       0.188000   -9999.000000       0.010000       0.379000
53791     53791     hebei          114.5167       37.7667           89       178     2012      04        22        113              0.207000      19.054749       0.000000       0.195796       0.171500       0.078700       0.056200       0.517000
53791     53791     hebei          114.5167       37.7667           89       178     2012      04        23        114              0.216458      24.204834       2.031494       0.187829       0.153000   -9999.000000       0.042500       0.222000
53791     53791     hebei          114.5167       37.7667           89       178     2012      04        24        115              0.277583      24.673676       5.806787       0.189146       0.276000       0.104900       0.102300   -9999.000000
53791     53791     hebei          114.5167       37.7667           89       178     2012      04        25        116              0.000000      17.327423       0.000000       0.264575   -9999.000000       0.175600   -9999.000000       0.775000
53791     53791     hebei          114.5167       37.7667           89       178     2012      04        26        117              0.271083      18.857941       0.000000       0.232271       0.133000   -9999.000000       0.043500       0.392000
53791     53791     hebei          114.5167       37.7667           89       178     2012      04        27        118              0.268000      22.658966       0.000000       0.213609       0.146000   -9999.000000   -9999.000000       0.558000
53791     53791     hebei          114.5167       37.7667           89       178     2012      04        28        119              0.260833      23.940521       0.000000       0.196728       0.149000   -9999.000000       0.072000       0.204000
53791     53791     hebei          114.5167       37.7667           89       178     2012      04        29        120              0.254583      20.951752       0.000000       0.187144       0.152000       0.186300       0.043200   -9999.000000
53791     53791     hebei          114.5167       37.7667           89       178     2012      04        30        121              0.258667      21.090637       0.000000       0.181733       0.172000       0.026200       0.039500       0.530000
53791     53791     hebei          114.5167       37.7667           89       178     2012      05        01        122              0.265833      24.642853       0.000000       0.178042       0.202000   -9999.000000   -9999.000000       0.329000
53791     53791     hebei          114.5167       37.7667           89       178     2012      05        02        123              0.267500      25.692169       0.000000       0.175927       0.172500       0.175000       0.010000       0.387000
53791     53791     hebei          114.5167       37.7667           89       178     2012      05        03        124              0.266000      27.540192       0.000000       0.169885       0.162000       0.194500       0.052500       0.194000
53791     53791     hebei          114.5167       37.7667           89       178     2012      05        04        125              0.262833      28.314850       0.000000       0.164200       0.163000   -9999.000000       0.028100   -9999.000000
53791     53791     hebei          114.5167       37.7667           89       178     2012      05        05        126              0.257667      29.713043       0.000000       0.160928       0.183000   -9999.000000       0.034600       0.373000
53791     53791     hebei          114.5167       37.7667           89       178     2012      05        06        127              0.254333      28.370056       0.000000       0.159751       0.202000   -9999.000000       0.047500       0.403000
53791     53791     hebei          114.5167       37.7667           89       178     2012      05        07        128              0.248167      31.454865       0.000000       0.158550   -9999.000000       0.268000   -9999.000000       0.320000
53791     53791     hebei          114.5167       37.7667           89       178     2012      05        08        129              0.241000      28.624847       0.000000       0.159279       0.172500       0.072100       0.010000       0.192000
53791     53791     hebei          114.5167       37.7667           89       178     2012      05        09        130              0.234833      28.453674       1.685786       0.158022   -9999.000000   -9999.000000       0.052400   -9999.000000
53791     53791     hebei          114.5167       37.7667           89       178     2012      05        10        131              0.235667      25.082672       0.000000       0.180315       0.179000   -9999.000000       0.024300       0.443000
53791     53791     hebei          114.5167       37.7667           89       178     2012      05        11        132              0.240750      28.926819      12.427404       0.173231       0.291000   -9999.000000       0.045600       0.704000
53791     53791     hebei          114.5167       37.7667           89       178     2012      05        12        133              0.259167      23.836365       2.062669       0.233247       0.158000   -9999.000000   -9999.000000       0.922000
53791     53791     hebei          114.5167       37.7667           89       178     2012      05        13        134              0.249583      22.243988       2.580968       0.255182       0.196500       0.113000       0.019900       0.327000
53791     53791     hebei          114.5167       37.7667           89       178     2012      05        14        135              0.240250      23.418274       0.000000       0.231357       0.171000   -9999.000000       0.010000   -9999.000000
53791     53791     hebei          114.5167       37.7667           89       178     2012      05        15        136              0.229167      24.261780       0.000000       0.210860       0.173000   -9999.000000       0.059600       0.256000
53791     53791     hebei          114.5167       37.7667           89       178     2012      05        16        137              0.219250      25.046448       0.000000       0.192163       0.192000   -9999.000000       0.039100       0.564000
53791     53791     hebei          114.5167       37.7667           89       178     2012      05        17        138              0.210667      26.134491       0.000000       0.178318       0.151000   -9999.000000       0.050700       0.291000
53791     53791     hebei          114.5167       37.7667           89       178     2012      05        18        139              0.205000      29.082794       0.000000       0.167957       0.178500       0.217600   -9999.000000       0.203000
53791     53791     hebei          114.5167       37.7667           89       178     2012      05        19        140              0.201167      29.611053       0.000000       0.164967       0.174000   -9999.000000       0.010000       0.363000
53791     53791     hebei          114.5167       37.7667           89       178     2012      05        20        141              0.196125      29.990662       0.371693       0.163534       0.167000   -9999.000000       0.062300       0.354000
53791     53791     hebei          114.5167       37.7667           89       178     2012      05        21        142              0.192917      27.849823       0.602276       0.163030       0.158000       0.082400       0.035300       0.534000
53791     53791     hebei          114.5167       37.7667           89       178     2012      05        22        143              0.191000      24.851776       0.000000       0.165168       0.159000   -9999.000000       0.041700       0.218000
53791     53791     hebei          114.5167       37.7667           89       178     2012      05        23        144              0.185000      27.337677       0.000000       0.161288   -9999.000000       0.139300       0.053200   -9999.000000
53791     53791     hebei          114.5167       37.7667           89       178     2012      05        24        145              0.178208      27.034790       0.000000       0.157920       0.139000   -9999.000000       0.057400       0.475000
53791     53791     hebei          114.5167       37.7667           89       178     2012      05        25        146              0.000000      28.318542       1.755836       0.154986       0.108000   -9999.000000       0.010000       0.466000
53791     53791     hebei          114.5167       37.7667           89       178     2012      05        26        147              0.163583      27.374725       0.000000       0.173139       0.138000       0.161100       0.059700       0.480000
53791     53791     hebei          114.5167       37.7667           89       178     2012      05        27        148              0.149833      29.537964       0.000000       0.162821       0.153000   -9999.000000       0.031000       0.304000
53791     53791     hebei          114.5167       37.7667           89       178     2012      05        28        149              0.142167      31.395416       0.000000       0.153731       0.116000       0.175900       0.049500   -9999.000000
53791     53791     hebei          114.5167       37.7667           89       178     2012      05        29        150              0.145333      30.874512       2.389551       0.152623       0.160500   -9999.000000   -9999.000000       0.399000
53791     53791     hebei          114.5167       37.7667           89       178     2012      05        30        151              0.151792      27.700195       0.000000       0.168493       0.139000       0.137300       0.018200   -9999.000000
53791     53791     hebei          114.5167       37.7667           89       178     2012      05        31        152              0.153917      28.022217       1.518701       0.166870       0.173000   -9999.000000   -9999.000000   -9999.000000
53791     53791     hebei          114.5167       37.7667           89       178     2012      06        01        153              0.158458      26.443420       0.367747       0.169015       0.168000   -9999.000000       0.066200       0.396000
53791     53791     hebei          114.5167       37.7667           89       178     2012      06        02        154              0.162167      26.676819       0.000000       0.170281       0.100500   -9999.000000       0.040100   -9999.000000
53791     53791     hebei          114.5167       37.7667           89       178     2012      06        03        155              0.172167      27.266571       4.855180       0.161668       0.166500       0.219600       0.069800       0.542000
53791     53791     hebei          114.5167       37.7667           89       178     2012      06        04        156              0.185542      24.561737       0.000000       0.210555       0.138000       0.326900   -9999.000000       0.530000
53791     53791     hebei          114.5167       37.7667           89       178     2012      06        05        157              0.189917      29.399231       0.000000       0.188961       0.136000       0.150800       0.010000       0.554000
53791     53791     hebei          114.5167       37.7667           89       178     2012      06        06        158              0.187250      30.758606       0.000000       0.166663       0.154000   -9999.000000       0.049200       0.286000
53791     53791     hebei          114.5167       37.7667           89       178     2012      06        07        159              0.186333      29.038971       2.790795       0.159632       0.175000   -9999.000000       0.040100   -9999.000000
53791     53791     hebei          114.5167       37.7667           89       178     2012      06        08        160              0.186875      29.441193       0.000000       0.184648       0.142500       0.209100       0.048400       0.364000
53791     53791     hebei          114.5167       37.7667           89       178     2012      06        09        161              0.187875      30.678131       0.972160       0.172521       0.133000   -9999.000000       0.044300       0.486000
53791     53791     hebei          114.5167       37.7667           89       178     2012      06        10        162              0.182500      32.876862       0.000000       0.160567       0.137000       0.273600       0.050700       0.563000
53791     53791     hebei          114.5167       37.7667           89       178     2012      06        11        163              0.000000      28.903992       0.000000       0.158147       0.107000   -9999.000000       0.010000       0.255000
53791     53791     hebei          114.5167       37.7667           89       178     2012      06        12        164              0.178833      31.855438       0.000000       0.149307       0.125000       0.282900       0.060900   -9999.000000
53791     53791     hebei          114.5167       37.7667           89       178     2012      06        13        165              0.176583      32.296112       0.061826       0.147606       0.100000       0.082000       0.034400       0.377000
53791     53791     hebei          114.5167       37.7667           89       178     2012      06        14        166              0.174381      31.297150       0.000000       0.148359       0.111000   -9999.000000       0.058300   -9999.000000
53791     53791     hebei          114.5167       37.7667           89       178     2012      06        15        167              0.170167      30.951263       0.000000       0.146735       0.113000       0.236900   -9999.000000       0.287000
53791     53791     hebei          114.5167       37.7667           89       178     2012      06        16        168              0.169917      31.519073       0.000000       0.145737       0.128000   -9999.000000       0.010000       0.426000
53791     53791     hebei          114.5167       37.7667           89       178     2012      06        17        169              0.168083      34.147919       0.000000       0.144471       0.148000   -9999.000000       0.035500       0.432000
53791     53791     hebei          114.5167       37.7667           89       178     2012      06        18        170              0.164417      35.734650       0.000000       0.143922       0.097500       0.036900       0.046500       0.524000
53791     53791     hebei          114.5167       37.7667           89       178     2012      06        19        171              0.160333      35.250488       0.000000       0.144194       0.131000   -9999.000000       0.039600       0.608000
53791     53791     hebei          114.5167       37.7667           89       178     2012      06        20        172              0.156458      36.128204       0.705107       0.143784       0.133000   -9999.000000       0.046600       0.406000
53791     53791     hebei          114.5167       37.7667           89       178     2012      06        21        173              0.267000      30.982422       6.396176       0.151351       0.139000   -9999.000000   -9999.000000   -9999.000000
53791     53791     hebei          114.5167       37.7667           89       178     2012      06        22        174              0.302500      30.537354       1.304458       0.201322       0.142000   -9999.000000       0.010000       0.703000
53791     53791     hebei          114.5167       37.7667           89       178     2012      06        23        175              0.294917      31.545776       0.000000       0.196485       0.098500       0.167800       0.050200       0.494000
53791     53791     hebei          114.5167       37.7667           89       178     2012      06        24        176              0.310458      31.974823      21.478064       0.170333       0.183000   -9999.000000       0.049000       0.948000
53791     53791     hebei          114.5167       37.7667           89       178     2012      06        25        177              0.310833      26.299561       6.726228       0.288134       0.147000   -9999.000000       0.067500       0.838000
53791     53791     hebei          114.5167       37.7667           89       178     2012      06        26        178              0.313917      27.496735       8.680429       0.276448       0.154000       0.270200       0.066800   -9999.000000
53791     53791     hebei          114.5167       37.7667           89       178     2012      06        27        179              0.321500      27.247345       0.450172       0.297571       0.162000   -9999.000000       0.060800       0.955000
53791     53791     hebei          114.5167       37.7667           89       178     2012      06        28        180              0.324708      26.953766      37.525749       0.281766       0.233000   -9999.000000       0.027200       1.000000
53791     53791     hebei          114.5167       37.7667           89       178     2012      06        29        181              0.318208      25.158508       9.472876       0.329197       0.156500   -9999.000000       0.067500       1.000000
53791     53791     hebei          114.5167       37.7667           89       178     2012      06        30        182              0.300375      25.475983       0.589922       0.343048       0.140000       0.239200       0.053300   -9999.000000
53791     53791     hebei          114.5167       37.7667           89       178     2012      07        01        183              0.291167      29.273407       0.000000       0.310645       0.162000   -9999.000000       0.056900   -9999.000000
53791     53791     hebei          114.5167       37.7667           89       178     2012      07        02        184              0.281500      31.496765       0.125727       0.291021       0.176000   -9999.000000   -9999.000000       0.828000
53791     53791     hebei          114.5167       37.7667           89       178     2012      07        03        185              0.276000      30.705505       0.288033       0.276397       0.178000       0.173300       0.010000       0.830000
53791     53791     hebei          114.5167       37.7667           89       178     2012      07        04        186              0.296583      32.065918      51.222385       0.265765       0.108000   -9999.000000       0.075800       0.569000
53791     53791     hebei          114.5167       37.7667           89       178     2012      07        05        187              0.309708      28.805939       0.000000       0.357199       0.174000       0.187900       0.052800       0.882000
53791     53791     hebei          114.5167       37.7667           89       178     2012      07        06        188              0.297375      28.956207       0.647745       0.337306   -9999.000000       0.155800       0.053100   -9999.000000
53791     53791     hebei          114.5167       37.7667           89       178     2012      07        07        189              0.290417      29.993195       0.648593       0.309411   -9999.000000   -9999.000000       0.065300       0.982000
53791     53791     hebei          114.5167       37.7667           89       178     2012      07        08        190              0.288667      28.564301       8.367832       0.304180       0.240000   -9999.000000   -9999.000000       1.000000
53791     53791     hebei          114.5167       37.7667           89       178     2012      07        09        191              0.311458      27.962646      42.832153       0.313850       0.248000   -9999.000000       0.010000       1.000000
53791     53791     hebei          114.5167       37.7667           89       178     2012      07        10        192              0.308083      26.668915       1.342273       0.365301       0.189500   -9999.000000       0.066000       0.802000
53791     53791     hebei          114.5167       37.7667           89       178     2012      07        11        193              0.297000      29.597931       0.000000       0.334234       0.162000       0.142900       0.039400   -9999.000000
53791     53791     hebei          114.5167       37.7667           89       178     2012      07        12        194              0.295000      31.496368       5.016373       0.315022       0.159000   -9999.000000       0.055800       0.847000
53791     53791     hebei          114.5167       37.7667           89       178     2012      07        13        195              0.294292      30.701752       0.715576       0.313520       0.225000   -9999.000000   -9999.000000   -9999.000000
53791     53791     hebei          114.5167       37.7667           89       178     2012      07        14        196              0.288333      26.566101       1.341017       0.311915       0.240000       0.194600       0.031400       0.668000
53791     53791     hebei          114.5167       37.7667           89       178     2012      07        15        197              0.280500      27.670654       0.000000       0.302793       0.172000   -9999.000000       0.010000   -9999.000000
53791     53791     hebei          114.5167       37.7667           89       178     2012      07        16        198              0.273167      28.203705       0.000000       0.292993       0.152000       0.231200       0.052700       0.685000
53791     53791     hebei          114.5167       37.7667           89       178     2012      07        17        199              0.266250      29.104462       0.000000       0.282977       0.153000   -9999.000000       0.031200       0.575000
53791     53791     hebei          114.5167       37.7667           89       178     2012      07        18        200              0.260083      29.299133       0.000000       0.275992       0.193000   -9999.000000       0.042800       0.709000
53791     53791     hebei          114.5167       37.7667           89       178     2012      07        19        201              0.254167      29.750153       0.000000       0.269025       0.183000       0.216000   -9999.000000       0.697000
53791     53791     hebei          114.5167       37.7667           89       178     2012      07        20        202              0.249391      30.874268       0.158537       0.261588       0.117000   -9999.000000       0.010000   -9999.000000
53791     53791     hebei          114.5167       37.7667           89       178     2012      07        21        203              0.246500      30.904694       5.093359       0.257934       0.233500       0.066100       0.053400       0.734000
53791     53791     hebei          114.5167       37.7667           89       178     2012      07        22        204              0.248583      29.616486       0.000000       0.280618       0.173000   -9999.000000       0.019000       0.830000
53791     53791     hebei          114.5167       37.7667           89       178     2012      07        23        205              0.246000      30.523682       0.000000       0.267172       0.188000       0.146300       0.032600       0.715000
53791     53791     hebei          114.5167       37.7667           89       178     2012      07        24        206              0.243667      30.994965       0.171816       0.252254       0.236000       0.041400       0.047000       0.621000
53791     53791     hebei          114.5167       37.7667           89       178     2012      07        25        207              0.252250      30.466370       5.914655       0.247129       0.187000   -9999.000000   -9999.000000   -9999.000000
53791     53791     hebei          114.5167       37.7667           89       178     2012      07        26        208              0.299375      30.944946      28.699892       0.265519       0.222000   -9999.000000       0.010000       1.000000
53791     53791     hebei          114.5167       37.7667           89       178     2012      07        27        209              0.309087      29.211456       4.340816       0.383270       0.222000   -9999.000000       0.070700       1.000000
53791     53791     hebei          114.5167       37.7667           89       178     2012      07        28        210              0.301625      28.976685       0.620783       0.318181       0.189000       0.236100       0.035900       0.848000
53791     53791     hebei          114.5167       37.7667           89       178     2012      07        29        211              0.295125      31.993164      15.785557       0.298644       0.220000       0.220600       0.052900       0.800000
53791     53791     hebei          114.5167       37.7667           89       178     2012      07        30        212              0.291083      32.514404      11.394654       0.308231   -9999.000000   -9999.000000   -9999.000000   -9999.000000
53791     53791     hebei          114.5167       37.7667           89       178     2012      07        31        213              0.309333      26.503754      19.372927       0.331666       0.327000   -9999.000000       0.029400       1.000000
53791     53791     hebei          114.5167       37.7667           89       178     2012      08        01        214              0.305083      23.290680       0.505328       0.353889       0.291000   -9999.000000       0.010800       0.940000
53791     53791     hebei          114.5167       37.7667           89       178     2012      08        02        215              0.299375      25.836090       0.000000       0.326666       0.225000   -9999.000000       0.048900       0.819000
53791     53791     hebei          114.5167       37.7667           89       178     2012      08        03        216              0.294917      28.064514       0.103586       0.313214       0.285000       0.126200       0.025200       0.906000
53791     53791     hebei          114.5167       37.7667           89       178     2012      08        04        217              0.290417      27.949585       0.000000       0.306305       0.311000   -9999.000000       0.036500   -9999.000000
53791     53791     hebei          114.5167       37.7667           89       178     2012      08        05        218              0.304042      29.995209       4.964833       0.295860       0.181500       0.141000   -9999.000000       0.726000
53791     53791     hebei          114.5167       37.7667           89       178     2012      08        06        219              0.300375      27.601532       0.093803       0.310771       0.258500       0.100400       0.010000       0.814000
53791     53791     hebei          114.5167       37.7667           89       178     2012      08        07        220              0.294708      29.335571       0.000000       0.297192       0.203000   -9999.000000   -9999.000000       0.719000
53791     53791     hebei          114.5167       37.7667           89       178     2012      08        08        221              0.310250      31.110931      43.833168       0.287126       0.217000       0.102800       0.029700       1.000000
53791     53791     hebei          114.5167       37.7667           89       178     2012      08        09        222              0.317708      29.668304       1.758495       0.367468       0.301000   -9999.000000       0.055900   -9999.000000
53791     53791     hebei          114.5167       37.7667           89       178     2012      08        10        223              0.306833      29.031738       0.165515       0.334247       0.277000       0.150100       0.053900       0.804000
53791     53791     hebei          114.5167       37.7667           89       178     2012      08        11        224              0.319042      29.192535      38.021412       0.315205       0.175000   -9999.000000       0.076000       1.000000
53791     53791     hebei          114.5167       37.7667           89       178     2012      08        12        225              0.321333      28.491425       4.691337       0.347073       0.269000   -9999.000000       0.010000       0.757000
53791     53791     hebei          114.5167       37.7667           89       178     2012      08        13        226              0.306833      25.490326       0.000000       0.346184       0.242000       0.069700       0.071900       0.740000
53791     53791     hebei          114.5167       37.7667           89       178     2012      08        14        227              0.301375      26.581543       4.937761       0.325226       0.330000   -9999.000000       0.044300       0.711000
53791     53791     hebei          114.5167       37.7667           89       178     2012      08        15        228              0.295542      23.014404       0.000000       0.328852       0.295000   -9999.000000       0.058700       0.796000
53791     53791     hebei          114.5167       37.7667           89       178     2012      08        16        229              0.289583      26.724274       0.000000       0.313884       0.173500       0.256900   -9999.000000       0.683000
53791     53791     hebei          114.5167       37.7667           89       178     2012      08        17        230              0.289000      27.461487       7.478801       0.304742   -9999.000000   -9999.000000       0.027100       0.924000
53791     53791     hebei          114.5167       37.7667           89       178     2012      08        18        231              0.299000      26.165649       1.904433       0.317131   -9999.000000   -9999.000000       0.047400   -9999.000000
53791     53791     hebei          114.5167       37.7667           89       178     2012      08        19        232              0.293458      26.261322       0.000000       0.321483       0.232000       0.107600       0.070900       0.849000
53791     53791     hebei          114.5167       37.7667           89       178     2012      08        20        233              0.287500      28.670898       5.048234       0.305677       0.231000       0.202900       0.040800       0.760000
53791     53791     hebei          114.5167       37.7667           89       178     2012      08        21        234              0.279500      28.625885       0.000000       0.305790       0.255500       0.192900       0.055000       0.756000
53791     53791     hebei          114.5167       37.7667           89       178     2012      08        22        235              0.272000      25.701996       0.000000       0.302000       0.264500   -9999.000000   -9999.000000   -9999.000000
53791     53791     hebei          114.5167       37.7667           89       178     2012      08        23        236              0.265833      25.792053       0.000000       0.290116       0.221000       0.108800       0.010000   -9999.000000
53791     53791     hebei          114.5167       37.7667           89       178     2012      08        24        237              0.257583      24.890015       0.000000       0.285050       0.220000       0.091500       0.058900       0.676000
53791     53791     hebei          114.5167       37.7667           89       178     2012      08        25        238              0.000000      25.327850       0.000000       0.277708       0.277000   -9999.000000       0.022200       0.641000
53791     53791     hebei          114.5167       37.7667           89       178     2012      08        26        239              0.253333      26.626862       0.000000       0.272648       0.301000       0.133900       0.054000       0.648000
53791     53791     hebei          114.5167       37.7667           89       178     2012      08        27        240              0.251333      27.422699       1.028003       0.268374       0.236000   -9999.000000       0.047500       0.645000
53791     53791     hebei          114.5167       37.7667           89       178     2012      08        28        241              0.248833      27.826141       0.000000       0.266083       0.243000       0.166000       0.050700   -9999.000000
53791     53791     hebei          114.5167       37.7667           89       178     2012      08        29        242              0.243917      28.867157       0.000000       0.259079       0.209000   -9999.000000       0.010000       0.650000
53791     53791     hebei          114.5167       37.7667           89       178     2012      08        30        243              0.239917      29.377289       0.000000       0.248692       0.295000       0.377400       0.056900       0.765000
53791     53791     hebei          114.5167       37.7667           89       178     2012      08        31        244              0.237333      29.853668       1.228272       0.242242       0.288000       0.257500       0.029700       0.646000
53791     53791     hebei          114.5167       37.7667           89       178     2012      09        01        245              0.269000      28.858490      17.691526       0.249018   -9999.000000   -9999.000000       0.056700       1.000000
53791     53791     hebei          114.5167       37.7667           89       178     2012      09        02        246              0.288958      25.571838       0.000000       0.317576       0.251000       0.140000   -9999.000000   -9999.000000
53791     53791     hebei          114.5167       37.7667           89       178     2012      09        03        247              0.277000      24.633850       0.000000       0.296787       0.191000       0.177900       0.010000       0.769000
53791     53791     hebei          114.5167       37.7667           89       178     2012      09        04        248              0.267917      24.468658       2.749970       0.279796       0.197000   -9999.000000       0.057800       0.634000
53791     53791     hebei          114.5167       37.7667           89       178     2012      09        05        249              0.283542      23.567261      21.871180       0.272761   -9999.000000   -9999.000000       0.071200       0.912000
53791     53791     hebei          114.5167       37.7667           89       178     2012      09        06        250              0.301417      21.100891      27.398664       0.325771       0.285000   -9999.000000       0.048000       0.900000
53791     53791     hebei          114.5167       37.7667           89       178     2012      09        07        251              0.299500      19.926239       0.000000       0.358975       0.245500       0.363000       0.058900   -9999.000000
53791     53791     hebei          114.5167       37.7667           89       178     2012      09        08        252              0.295542      22.673218       0.000000       0.327971       0.211000       0.175900   -9999.000000       0.830000
53791     53791     hebei          114.5167       37.7667           89       178     2012      09        09        253              0.291167      23.409546       0.000000       0.316470       0.206000   -9999.000000       0.010000       0.718000
53791     53791     hebei          114.5167       37.7667           89       178     2012      09        10        254              0.287000      24.916321       1.352635       0.307461   -9999.000000       0.162400       0.068100       0.605000
53791     53791     hebei          114.5167       37.7667           89       178     2012      09        11        255              0.283833      24.702240       6.079353       0.304087       0.202000       0.104700       0.033800       0.730000
53791     53791     hebei          114.5167       37.7667           89       178     2012      09        12        256              0.276667      24.403473       0.000000       0.300618       0.132500   -9999.000000       0.052000       0.645000
53791     53791     hebei          114.5167       37.7667           89       178     2012      09        13        257              0.268667      21.378143       0.000000       0.292784       0.177000       0.128100       0.052400       0.627000
53791     53791     hebei          114.5167       37.7667           89       178     2012      09        14        258              0.262000      22.144806       0.000000       0.286769       0.159000   -9999.000000       0.032900       0.635000
53791     53791     hebei          114.5167       37.7667           89       178     2012      09        15        259              0.256583      21.706238       0.000000       0.281929   -9999.000000   -9999.000000       0.010000       0.459000
53791     53791     hebei          114.5167       37.7667           89       178     2012      09        16        260              0.249667      21.907745       0.000000       0.277297       0.232000       0.095300       0.062800   -9999.000000
53791     53791     hebei          114.5167       37.7667           89       178     2012      09        17        261              0.244333      21.964050       0.000000       0.273272       0.213000   -9999.000000       0.027900       0.595000
53791     53791     hebei          114.5167       37.7667           89       178     2012      09        18        262              0.240667      22.903656       0.000000       0.270081       0.186500       0.088800       0.044000       0.552000
53791     53791     hebei          114.5167       37.7667           89       178     2012      09        19        263              0.238957      23.521088       0.000000       0.266460       0.157000   -9999.000000   -9999.000000       0.696000
53791     53791     hebei          114.5167       37.7667           89       178     2012      09        20        264              0.236000      23.252167       0.143240       0.263789       0.165000       0.195000       0.010000       0.496000
53791     53791     hebei          114.5167       37.7667           89       178     2012      09        21        265              0.237000      23.799805       2.370424       0.260673   -9999.000000       0.063400       0.056300   -9999.000000
53791     53791     hebei          114.5167       37.7667           89       178     2012      09        22        266              0.234667      21.516266       0.000000       0.276814       0.191000   -9999.000000       0.026100       0.684000
53791     53791     hebei          114.5167       37.7667           89       178     2012      09        23        267              0.231333      23.535461       0.000000       0.268996       0.133500   -9999.000000       0.032900       0.594000
53791     53791     hebei          114.5167       37.7667           89       178     2012      09        24        268              0.229500      23.874573       0.000000       0.263938       0.160500   -9999.000000       0.046100       0.656000
53791     53791     hebei          114.5167       37.7667           89       178     2012      09        25        269              0.252667      23.714355      21.503384       0.260897       0.156000       0.293700   -9999.000000       1.000000
53791     53791     hebei          114.5167       37.7667           89       178     2012      09        26        270              0.264583      22.350983       0.000000       0.314288       0.175500       0.087700       0.010000   -9999.000000
53791     53791     hebei          114.5167       37.7667           89       178     2012      09        27        271              0.257143      21.986908       0.000000       0.305234       0.177000   -9999.000000       0.053700       0.812000
53791     53791     hebei          114.5167       37.7667           89       178     2012      09        28        272              0.241333      21.241364       0.000000       0.292525       0.117500   -9999.000000       0.029800       0.623000
53791     53791     hebei          114.5167       37.7667           89       178     2012      09        29        273              0.234917      19.429321       0.000000       0.284794       0.169500   -9999.000000       0.049100       0.683000
53791     53791     hebei          114.5167       37.7667           89       178     2012      09        30        274              0.226833      19.439758       0.000000       0.280076       0.151000   -9999.000000   -9999.000000       0.401000
53791     53791     hebei          114.5167       37.7667           89       178     2012      10        01        275              0.221917      19.632080       0.000000       0.276116       0.118000       0.145500       0.021100   -9999.000000
53791     53791     hebei          114.5167       37.7667           89       178     2012      10        02        276              0.218333      20.637939       0.191026       0.272249       0.141000   -9999.000000       0.010000       0.525000
53791     53791     hebei          114.5167       37.7667           89       178     2012      10        03        277              0.214750      21.693390       0.000000       0.269531       0.146000       0.116400       0.051700       0.603000
53791     53791     hebei          114.5167       37.7667           89       178     2012      10        04        278              0.212000      21.604095       1.805545       0.266024       0.131500       0.065000       0.035200       0.519000
53791     53791     hebei          114.5167       37.7667           89       178     2012      10        05        279              0.210667      19.501434       0.396402       0.274017       0.129000       0.240100       0.040200       0.426000
53791     53791     hebei          114.5167       37.7667           89       178     2012      10        06        280              0.207500      20.000397       0.000000       0.270571       0.126000       0.272800   -9999.000000   -9999.000000
53791     53791     hebei          114.5167       37.7667           89       178     2012      10        07        281              0.206000      20.298035       0.000000       0.266056       0.142000   -9999.000000       0.010000       0.471000
53791     53791     hebei          114.5167       37.7667           89       178     2012      10        08        282              0.206000      20.250458       0.090071       0.263920       0.138000       0.161400       0.054400       0.640000
53791     53791     hebei          114.5167       37.7667           89       178     2012      10        09        283              0.198333      21.160919       0.000000       0.262409       0.084500       0.055900       0.021300       0.456000
53791     53791     hebei          114.5167       37.7667           89       178     2012      10        10        284              0.191167      19.396759       0.000000       0.256903       0.126500       0.291900       0.046400       0.323000
53791     53791     hebei          114.5167       37.7667           89       178     2012      10        11        285              0.187500      17.943359       0.000000       0.254560       0.100000   -9999.000000       0.045800       0.474000
53791     53791     hebei          114.5167       37.7667           89       178     2012      10        12        286              0.185500      18.695038       0.000000       0.254228       0.102000   -9999.000000       0.054200       0.452000
53791     53791     hebei          114.5167       37.7667           89       178     2012      10        13        287              0.180708      19.642975       0.000000       0.253339       0.112000       0.201500       0.010000       0.442000
53791     53791     hebei          114.5167       37.7667           89       178     2012      10        14        288              0.176917      18.093445       0.000000       0.250761       0.112000       0.075200       0.057000       0.423000
53791     53791     hebei          114.5167       37.7667           89       178     2012      10        15        289              0.175000      17.089600       0.502061       0.249521       0.118500   -9999.000000       0.026600   -9999.000000
53791     53791     hebei          114.5167       37.7667           89       178     2012      10        16        290              0.173708      15.898773       0.514280       0.253677       0.107000   -9999.000000       0.044500       0.506000
53791     53791     hebei          114.5167       37.7667           89       178     2012      10        17        291              0.168125      14.443909       0.000000       0.255653       0.107000       0.119000   -9999.000000       0.392000
53791     53791     hebei          114.5167       37.7667           89       178     2012      10        18        292              0.163348      14.732849       0.051012       0.250658   -9999.000000       0.132600       0.010000       0.552000
53791     53791     hebei          114.5167       37.7667           89       178     2012      10        19        293              0.167292      15.695343       0.000000       0.250144       0.122000   -9999.000000       0.017300       0.407000
53791     53791     hebei          114.5167       37.7667           89       178     2012      10        20        294              0.251435      16.342285       0.000000       0.249407       0.095500   -9999.000000       0.053900   -9999.000000
53791     53791     hebei          114.5167       37.7667           89       178     2012      10        21        295              0.282458      17.849457       1.477232       0.248792       0.145500       0.077100       0.034400       0.567000
53791     53791     hebei          114.5167       37.7667           89       178     2012      10        22        296              0.294708      13.754395       0.000000       0.263028   -9999.000000       0.117300       0.041700       0.437000
53791     53791     hebei          114.5167       37.7667           89       178     2012      10        23        297              0.289250      14.554871       0.000000       0.256504   -9999.000000   -9999.000000   -9999.000000       0.534000
53791     53791     hebei          114.5167       37.7667           89       178     2012      10        24        298              0.281667      15.619080       0.000000       0.254123   -9999.000000       0.179100       0.010000       0.334000
53791     53791     hebei          114.5167       37.7667           89       178     2012      10        25        299              0.000000      16.761353       0.000000       0.251868       0.082500   -9999.000000       0.052000   -9999.000000
53791     53791     hebei          114.5167       37.7667           89       178     2012      10        26        300              0.275000      16.747467       0.316932       0.250401       0.117000   -9999.000000       0.025500       0.522000
53791     53791     hebei          114.5167       37.7667           89       178     2012      10        27        301              0.272667      15.906586       0.000000       0.253610       0.117000       0.068700       0.044100       0.574000
53791     53791     hebei          114.5167       37.7667           89       178     2012      10        28        302              0.000000      17.005737       0.000000       0.251979       0.120000   -9999.000000       0.046700       0.580000
53791     53791     hebei          114.5167       37.7667           89       178     2012      10        29        303              0.270000      14.325439       0.000000       0.249538   -9999.000000   -9999.000000       0.046800       0.254000
53791     53791     hebei          114.5167       37.7667           89       178     2012      10        30        304              0.265833      13.548767       0.000000       0.250112   -9999.000000   -9999.000000       0.010000   -9999.000000
53791     53791     hebei          114.5167       37.7667           89       178     2012      10        31        305              0.262000      12.051178       0.000000       0.248477       0.081000       0.330400       0.048700       0.336000
53791     53791     hebei          114.5167       37.7667           89       178     2012      11        01        306              0.261000      11.180115       0.050260       0.247318       0.107000       0.039600       0.018600       0.455000
53791     53791     hebei          114.5167       37.7667           89       178     2012      11        02        307              0.258000      12.008179       0.125518       0.248742       0.109000   -9999.000000       0.040100       0.429000
53791     53791     hebei          114.5167       37.7667           89       178     2012      11        03        308              0.268833      11.892700      17.764259       0.249578   -9999.000000   -9999.000000   -9999.000000       0.557000
53791     53791     hebei          114.5167       37.7667           89       178     2012      11        04        309              0.267167       7.925568       0.848359       0.315240   -9999.000000   -9999.000000       0.010000   -9999.000000
53791     53791     hebei          114.5167       37.7667           89       178     2012      11        05        310              0.263500       6.556244       0.000000       0.300068       0.051000       0.333900       0.053800       0.355000
53791     53791     hebei          114.5167       37.7667           89       178     2012      11        06        311              0.261000       9.178619       0.000000       0.289134       0.122000       0.290500       0.018300   -9999.000000
53791     53791     hebei          114.5167       37.7667           89       178     2012      11        07        312              0.258000      10.039062       0.000000       0.284595       0.118000   -9999.000000       0.033200       0.299000
53791     53791     hebei          114.5167       37.7667           89       178     2012      11        08        313              0.256833       9.515045       0.000000       0.282249       0.125000       0.031900   -9999.000000       0.473000
53791     53791     hebei          114.5167       37.7667           89       178     2012      11        09        314              0.256250       9.472565       7.072953       0.279395   -9999.000000       0.142100   -9999.000000       0.497000
53791     53791     hebei          114.5167       37.7667           89       178     2012      11        10        315              0.271167       9.636017       8.295257       0.290530   -9999.000000   -9999.000000       0.010000       0.640000
53791     53791     hebei          114.5167       37.7667           89       178     2012      11        11        316              0.266500       6.913727       0.000000       0.323262       0.142000   -9999.000000       0.054400       0.634000
53791     53791     hebei          114.5167       37.7667           89       178     2012      11        12        317              0.261667       6.537201       0.000000       0.302074       0.136000   -9999.000000       0.021400       0.327000
53791     53791     hebei          114.5167       37.7667           89       178     2012      11        13        318              0.000000       7.460052       0.000000       0.296479       0.125000   -9999.000000       0.042700   -9999.000000
53791     53791     hebei          114.5167       37.7667           89       178     2012      11        14        319              0.256417       6.243378       0.000000       0.291545   -9999.000000       0.024200   -9999.000000       0.441000
53791     53791     hebei          114.5167       37.7667           89       178     2012      11        15        320              0.255500       5.680878       2.138405       0.288942   -9999.000000   -9999.000000       0.022700       0.595000
53791     53791     hebei          114.5167       37.7667           89       178     2012      11        16        321              0.255167       5.750793       0.173712       0.294689       0.080000       0.146700       0.010000       0.710000
53791     53791     hebei          114.5167       37.7667           89       178     2012      11        17        322              0.000000       6.345398       0.000000       0.292751       0.119000   -9999.000000       0.050300       0.338000
53791     53791     hebei          114.5167       37.7667           89       178     2012      11        18        323              0.251667       6.980621       0.000000       0.289573       0.117000   -9999.000000       0.019600   -9999.000000
53791     53791     hebei          114.5167       37.7667           89       178     2012      11        19        324              0.249667       7.041443       0.000000       0.288089       0.126000       0.161600       0.041500       0.364000
53791     53791     hebei          114.5167       37.7667           89       178     2012      11        20        325              0.248000       6.418945       0.000000       0.286144   -9999.000000   -9999.000000   -9999.000000       0.320000
53791     53791     hebei          114.5167       37.7667           89       178     2012      11        21        326              0.248000       5.809082       0.000000       0.285791       0.046000   -9999.000000       0.010000       0.612000
53791     53791     hebei          114.5167       37.7667           89       178     2012      11        22        327              0.247913       5.994049       0.000000       0.285361   -9999.000000   -9999.000000       0.041000       0.244000
53791     53791     hebei          114.5167       37.7667           89       178     2012      11        23        328              0.246417       4.725891       0.000000       0.284663       0.106000   -9999.000000       0.010000   -9999.000000
53791     53791     hebei          114.5167       37.7667           89       178     2012      11        24        329              0.245167       3.776001       0.000000       0.273464       0.114000       0.097800       0.022500       0.526000
53791     53791     hebei          114.5167       37.7667           89       178     2012      11        25        330              0.245130       4.480560       0.000000       0.280273   -9999.000000   -9999.000000       0.041300       0.353000
53791     53791     hebei          114.5167       37.7667           89       178     2012      11        26        331              0.243000       4.215607       0.000000       0.281407   -9999.000000       0.283600   -9999.000000       0.559000
53791     53791     hebei          114.5167       37.7667           89       178     2012      11        27        332              0.242000       4.315460       0.248583       0.274473       0.090000       0.034900       0.010000       0.322000
53791     53791     hebei          114.5167       37.7667           89       178     2012      11        28        333              0.241417       5.630554       0.000000       0.279046       0.111000   -9999.000000       0.038300   -9999.000000
53791     53791     hebei          114.5167       37.7667           89       178     2012      11        29        334              0.240000       3.776001       0.000000       0.268799       0.107000       0.120900       0.013400       0.155000
53791     53791     hebei          114.5167       37.7667           89       178     2012      11        30        335              0.237500       2.592010       0.000000       0.256990   -9999.000000   -9999.000000       0.034600       0.253000
53791     53791     hebei          114.5167       37.7667           89       178     2012      12        01        336              0.235833       1.241455       0.029665       0.230205   -9999.000000       0.213000   -9999.000000       0.369000
53791     53791     hebei          114.5167       37.7667           89       178     2012      12        02        337              0.232000      -0.584045       0.000000       0.189455   -9999.000000       0.088500       0.010000       0.040000
53791     53791     hebei          114.5167       37.7667           89       178     2012      12        03        338              0.234167      -0.123901       0.151973       0.183026   -9999.000000   -9999.000000       0.010000   -9999.000000
53791     53791     hebei          114.5167       37.7667           89       178     2012      12        04        339              0.232000       0.742584       0.000000       0.218321       0.106000       0.034400       0.037700       0.080000
53791     53791     hebei          114.5167       37.7667           89       178     2012      12        05        340              0.231917       1.152374       0.000000       0.228506   -9999.000000   -9999.000000       0.015000   -9999.000000
53791     53791     hebei          114.5167       37.7667           89       178     2012      12        06        341              0.230417       0.613770       0.000000       0.216075   -9999.000000       0.092200       0.030000       0.092000
53791     53791     hebei          114.5167       37.7667           89       178     2012      12        07        342              0.228000      -1.016327       0.000000       0.178681   -9999.000000       0.060900   -9999.000000       0.428000
53791     53791     hebei          114.5167       37.7667           89       178     2012      12        08        343              0.224083      -0.251678       0.000000       0.192142   -9999.000000   -9999.000000       0.010000       0.180000
53791     53791     hebei          114.5167       37.7667           89       178     2012      12        09        344              0.218500      -1.196106       0.000000       0.182563   -9999.000000   -9999.000000       0.039600       0.101000
53791     53791     hebei          114.5167       37.7667           89       178     2012      12        10        345              0.216917      -0.505341       0.000000       0.188650   -9999.000000   -9999.000000       0.010000       0.296000
53791     53791     hebei          114.5167       37.7667           89       178     2012      12        11        346              0.217500      -0.971313       0.000000       0.179745   -9999.000000       0.141400       0.030100       0.125000
53791     53791     hebei          114.5167       37.7667           89       178     2012      12        12        347              0.222000      -0.884796       0.000000       0.173366   -9999.000000   -9999.000000       0.032100   -9999.000000
53791     53791     hebei          114.5167       37.7667           89       178     2012      12        13        348              0.223500      -0.455841       8.611717       0.182970   -9999.000000   -9999.000000       0.033900       0.264000
53791     53791     hebei          114.5167       37.7667           89       178     2012      12        14        349              0.228792       0.011902       0.526943       0.187252   -9999.000000       0.085300       0.010000       0.559000
53791     53791     hebei          114.5167       37.7667           89       178     2012      12        15        350              0.000000      -0.128235       0.695564       0.195719   -9999.000000   -9999.000000       0.051600       0.839000
53791     53791     hebei          114.5167       37.7667           89       178     2012      12        16        351              0.241500       0.761108       0.853218       0.231463   -9999.000000   -9999.000000   -9999.000000       0.475000
53791     53791     hebei          114.5167       37.7667           89       178     2012      12        17        352              0.241250       0.619629       0.000000       0.231276   -9999.000000   -9999.000000       0.031500   -9999.000000
53791     53791     hebei          114.5167       37.7667           89       178     2012      12        18        353              0.236667       0.586548       0.000000       0.225663   -9999.000000   -9999.000000   -9999.000000       0.585000
53791     53791     hebei          114.5167       37.7667           89       178     2012      12        19        354              0.236000      -0.195190       0.000000       0.197388   -9999.000000       0.173300       0.010000       0.239000
53791     53791     hebei          114.5167       37.7667           89       178     2012      12        20        355              0.000000      -0.677521       1.114715       0.179935   -9999.000000       0.097900       0.029700       0.494000
53791     53791     hebei          114.5167       37.7667           89       178     2012      12        21        356              0.000000      -1.438202       0.036323       0.162377   -9999.000000   -9999.000000       0.032700       0.098000
53791     53791     hebei          114.5167       37.7667           89       178     2012      12        22        357              0.230500      -0.937103       0.000000       0.176863   -9999.000000   -9999.000000       0.010000   -9999.000000
53791     53791     hebei          114.5167       37.7667           89       178     2012      12        23        358              0.223083      -2.044678       0.000000       0.171678   -9999.000000   -9999.000000   -9999.000000       0.226000
53791     53791     hebei          114.5167       37.7667           89       178     2012      12        24        359              0.215111      -4.257172       0.000000       0.143964   -9999.000000   -9999.000000   -9999.000000       0.228000
53791     53791     hebei          114.5167       37.7667           89       178     2012      12        25        360              0.206417      -3.918304       0.000000       0.143453   -9999.000000       0.060600       0.010000       0.424000
53791     53791     hebei          114.5167       37.7667           89       178     2012      12        26        361              0.000000      -4.676483       0.000000       0.137874   -9999.000000   -9999.000000       0.036600       0.174000
53791     53791     hebei          114.5167       37.7667           89       178     2012      12        27        362              0.192100      -4.540680       0.000000       0.137111   -9999.000000   -9999.000000       0.010000   -9999.000000
53791     53791     hebei          114.5167       37.7667           89       178     2012      12        28        363              0.197000      -3.878204       0.176737       0.140082   -9999.000000   -9999.000000       0.027400       0.073000
53791     53791     hebei          114.5167       37.7667           89       178     2012      12        29        364              0.000000      -3.712555       0.000000       0.136957   -9999.000000   -9999.000000   -9999.000000   -9999.000000
53791     53791     hebei          114.5167       37.7667           89       178     2012      12        30        365              0.000000      -2.980896       0.000000       0.146452   -9999.000000   -9999.000000       0.010000       0.468000
53791     53791     hebei          114.5167       37.7667           89       178     2012      12        31        366              0.185600      -1.738922       0.000000       0.172194   -9999.000000   -9999.000000       0.010000   -9999.000000
