# Supplementary material for: Research on Fusing Multisatellite Soil Moisture Data Based on Bayesian Model Averaging
Source: Hindawi journal article supplement (doi:10.1155/2018/9310838), 2018-06-25
Supplement: f1 [file 9310838.f1.zip › 2012_sm00-10cm_daily_ZDB_ZHY_53797_366days_allin.txt]

53797     53797     hebei          114.5147       37.2775           91       178     2012      01        01        001              0.000000   -9999.000000       0.000000   -9999.000000   -9999.000000   -9999.000000       0.034600   -9999.000000
53797     53797     hebei          114.5147       37.2775           91       178     2012      01        02        002              0.052667      -3.056488       0.000000       0.147804   -9999.000000   -9999.000000       0.059800       0.043000
53797     53797     hebei          114.5147       37.2775           91       178     2012      01        03        003              0.000000      -1.956757       0.410781       0.160525   -9999.000000   -9999.000000   -9999.000000       0.143000
53797     53797     hebei          114.5147       37.2775           91       178     2012      01        04        004              0.043958      -1.621796       0.953613       0.175957   -9999.000000   -9999.000000       0.058000   -9999.000000
53797     53797     hebei          114.5147       37.2775           91       178     2012      01        05        005              0.043250      -2.778168       0.943559       0.165670   -9999.000000   -9999.000000       0.034600       0.205000
53797     53797     hebei          114.5147       37.2775           91       178     2012      01        06        006              0.044500      -2.374084       0.000000       0.166588   -9999.000000   -9999.000000       0.060900       0.047000
53797     53797     hebei          114.5147       37.2775           91       178     2012      01        07        007              0.046125      -2.199890       0.138631       0.163794   -9999.000000   -9999.000000       0.049000       0.129000
53797     53797     hebei          114.5147       37.2775           91       178     2012      01        08        008              0.000000      -2.174652       0.000000       0.159241   -9999.000000       0.027200       0.059200       0.089000
53797     53797     hebei          114.5147       37.2775           91       178     2012      01        09        009              0.046208      -2.554382       0.000000       0.159069   -9999.000000   -9999.000000   -9999.000000   -9999.000000
53797     53797     hebei          114.5147       37.2775           91       178     2012      01        10        010              0.046625      -1.728027       0.000000       0.169618   -9999.000000       0.106200       0.014900       0.201000
53797     53797     hebei          114.5147       37.2775           91       178     2012      01        11        011              0.043500      -1.483124       0.000000       0.176541   -9999.000000       0.056600       0.043500       0.096000
53797     53797     hebei          114.5147       37.2775           91       178     2012      01        12        012              0.042875      -2.292297       0.000000       0.167977       0.074000       0.075100       0.030700       0.143000
53797     53797     hebei          114.5147       37.2775           91       178     2012      01        13        013              0.043750      -0.602295       0.000000       0.182681       0.084000   -9999.000000       0.032700       0.052000
53797     53797     hebei          114.5147       37.2775           91       178     2012      01        14        014              0.045208      -0.143585       0.000000       0.188126   -9999.000000   -9999.000000       0.039000   -9999.000000
53797     53797     hebei          114.5147       37.2775           91       178     2012      01        15        015              0.046250      -0.074738       0.000000       0.189391   -9999.000000   -9999.000000   -9999.000000       0.011000
53797     53797     hebei          114.5147       37.2775           91       178     2012      01        16        016              0.049333      -0.417175       0.000000       0.183471   -9999.000000   -9999.000000       0.010000       0.104000
53797     53797     hebei          114.5147       37.2775           91       178     2012      01        17        017              0.000000      -0.707733       0.000000       0.182909   -9999.000000   -9999.000000       0.039700       0.041000
53797     53797     hebei          114.5147       37.2775           91       178     2012      01        18        018              0.056292      -0.183258       0.000000       0.186075   -9999.000000   -9999.000000       0.028400       0.007000
53797     53797     hebei          114.5147       37.2775           91       178     2012      01        19        019              0.058708      -0.544159       0.321072       0.179172   -9999.000000   -9999.000000       0.038900   -9999.000000
53797     53797     hebei          114.5147       37.2775           91       178     2012      01        20        020              0.059733      -0.003082       0.360489       0.189052   -9999.000000   -9999.000000   -9999.000000       0.051000
53797     53797     hebei          114.5147       37.2775           91       178     2012      01        21        021              0.000000      -1.809784       0.000000       0.164687   -9999.000000   -9999.000000       0.027300   -9999.000000
53797     53797     hebei          114.5147       37.2775           91       178     2012      01        22        022              0.044286      -5.255585       0.000000       0.139354   -9999.000000   -9999.000000       0.012600       0.005000
53797     53797     hebei          114.5147       37.2775           91       178     2012      01        23        023              0.041958      -4.209290       0.000000       0.148388   -9999.000000   -9999.000000       0.042600   -9999.000000
53797     53797     hebei          114.5147       37.2775           91       178     2012      01        24        024              0.041000      -3.146515       0.000000       0.160254       0.097000   -9999.000000   -9999.000000       0.121000
53797     53797     hebei          114.5147       37.2775           91       178     2012      01        25        025              0.040917      -2.172394       0.000000       0.170294       0.098000       0.026000       0.042400       0.052000
53797     53797     hebei          114.5147       37.2775           91       178     2012      01        26        026              0.042792      -0.678528       0.000000       0.181733   -9999.000000   -9999.000000   -9999.000000       0.172000
53797     53797     hebei          114.5147       37.2775           91       178     2012      01        27        027              0.044083       0.417999       0.000000       0.191828   -9999.000000   -9999.000000       0.018400       0.141000
53797     53797     hebei          114.5147       37.2775           91       178     2012      01        28        028              0.046875      -0.245117       0.000000       0.186649   -9999.000000       0.096400       0.045500   -9999.000000
53797     53797     hebei          114.5147       37.2775           91       178     2012      01        29        029              0.048750      -0.081299       0.000000       0.186811   -9999.000000       0.108900       0.033100       0.097000
53797     53797     hebei          114.5147       37.2775           91       178     2012      01        30        030              0.048375      -0.740051       0.000000       0.178299       0.089000       0.003500       0.026100       0.025000
53797     53797     hebei          114.5147       37.2775           91       178     2012      01        31        031              0.046167      -0.502594       0.000000       0.184191   -9999.000000       0.019700       0.036800       0.153000
53797     53797     hebei          114.5147       37.2775           91       178     2012      02        01        032              0.043792      -1.555634       0.000000       0.173254   -9999.000000   -9999.000000   -9999.000000       0.192000
53797     53797     hebei          114.5147       37.2775           91       178     2012      02        02        033              0.041458      -3.414520       0.000000       0.156728   -9999.000000   -9999.000000       0.010000   -9999.000000
53797     53797     hebei          114.5147       37.2775           91       178     2012      02        03        034              0.042292      -2.344879       0.000000       0.166233       0.086000   -9999.000000       0.035100       0.137000
53797     53797     hebei          114.5147       37.2775           91       178     2012      02        04        035              0.044667      -0.305115       0.000000       0.182168   -9999.000000   -9999.000000       0.023400       0.062000
53797     53797     hebei          114.5147       37.2775           91       178     2012      02        05        036              0.045750      -1.567139       0.000000       0.173248   -9999.000000   -9999.000000       0.035600       0.207000
53797     53797     hebei          114.5147       37.2775           91       178     2012      02        06        037              0.045375       0.463104       0.000000       0.190626   -9999.000000   -9999.000000   -9999.000000       0.067000
53797     53797     hebei          114.5147       37.2775           91       178     2012      02        07        038              0.041542      -0.595612       0.000000       0.184206       0.062000   -9999.000000       0.032600   -9999.000000
53797     53797     hebei          114.5147       37.2775           91       178     2012      02        08        039              0.041625      -1.659210       0.487751       0.169750       0.092000   -9999.000000       0.023000       0.190000
53797     53797     hebei          114.5147       37.2775           91       178     2012      02        09        040              0.043958      -0.191772       0.000000       0.183526   -9999.000000   -9999.000000       0.045700       0.118000
53797     53797     hebei          114.5147       37.2775           91       178     2012      02        10        041              0.044333      -0.467560       0.000000       0.181361       0.090000   -9999.000000       0.031300       0.217000
53797     53797     hebei          114.5147       37.2775           91       178     2012      02        11        042              0.045292       0.319855       0.000000       0.188414   -9999.000000   -9999.000000       0.043200       0.094000
53797     53797     hebei          114.5147       37.2775           91       178     2012      02        12        043              0.047958       1.621063       0.000000       0.196501   -9999.000000   -9999.000000   -9999.000000   -9999.000000
53797     53797     hebei          114.5147       37.2775           91       178     2012      02        13        044              0.048500       0.337921       0.000000       0.190831       0.083000   -9999.000000   -9999.000000       0.072000
53797     53797     hebei          114.5147       37.2775           91       178     2012      02        14        045              0.049435       1.163574       0.000000       0.200615   -9999.000000   -9999.000000       0.048000       0.079000
53797     53797     hebei          114.5147       37.2775           91       178     2012      02        15        046              0.051042       0.633514       0.000000       0.197624       0.077000   -9999.000000       0.035200       0.127000
53797     53797     hebei          114.5147       37.2775           91       178     2012      02        16        047              0.050333       1.660126       0.000000       0.200685   -9999.000000   -9999.000000       0.043500       0.110000
53797     53797     hebei          114.5147       37.2775           91       178     2012      02        17        048              0.047333       1.282715       0.000000       0.194848   -9999.000000   -9999.000000       0.042800   -9999.000000
53797     53797     hebei          114.5147       37.2775           91       178     2012      02        18        049              0.046292       0.676758       0.000000       0.188295       0.065000   -9999.000000   -9999.000000       0.063000
53797     53797     hebei          114.5147       37.2775           91       178     2012      02        19        050              0.047167       1.212585       0.000000       0.190976       0.077000   -9999.000000       0.010600   -9999.000000
53797     53797     hebei          114.5147       37.2775           91       178     2012      02        20        051              0.052375       2.525055       0.000000       0.199861       0.079000   -9999.000000       0.043300       0.209000
53797     53797     hebei          114.5147       37.2775           91       178     2012      02        21        052              0.057875       3.659821       0.000000       0.212029   -9999.000000   -9999.000000   -9999.000000       0.008000
53797     53797     hebei          114.5147       37.2775           91       178     2012      02        22        053              0.061250       3.141357       0.000000       0.210151   -9999.000000   -9999.000000       0.046300       0.159000
53797     53797     hebei          114.5147       37.2775           91       178     2012      02        23        054              0.068167       4.387634       0.000000       0.223584       0.060000   -9999.000000   -9999.000000       0.181000
53797     53797     hebei          114.5147       37.2775           91       178     2012      02        24        055              0.072348       3.269897       0.000000       0.208148       0.080000   -9999.000000       0.032500       0.229000
53797     53797     hebei          114.5147       37.2775           91       178     2012      02        25        056              0.076125       2.618561       0.000000       0.208601   -9999.000000   -9999.000000       0.029400       0.167000
53797     53797     hebei          114.5147       37.2775           91       178     2012      02        26        057              0.077458       1.650024       0.025432       0.202141       0.089000   -9999.000000       0.043000   -9999.000000
53797     53797     hebei          114.5147       37.2775           91       178     2012      02        27        058              0.081875       3.443542       0.000000       0.209214   -9999.000000   -9999.000000   -9999.000000       0.185000
53797     53797     hebei          114.5147       37.2775           91       178     2012      02        28        059              0.095750       4.614655       0.000000       0.220227       0.066000   -9999.000000       0.039600       0.219000
53797     53797     hebei          114.5147       37.2775           91       178     2012      02        29        060              0.000000   -9999.000000       0.000000   -9999.000000       0.086000   -9999.000000   -9999.000000   -9999.000000
53797     53797     hebei          114.5147       37.2775           91       178     2012      03        01        061              0.143083       5.408997       0.464503       0.224649       0.092000   -9999.000000       0.018100       0.503000
53797     53797     hebei          114.5147       37.2775           91       178     2012      03        02        062              0.164250       4.021301       0.000000       0.231656       0.108000       0.018100       0.040900   -9999.000000
53797     53797     hebei          114.5147       37.2775           91       178     2012      03        03        063              0.166750       3.279419       0.000000       0.226749   -9999.000000   -9999.000000       0.033300       0.412000
53797     53797     hebei          114.5147       37.2775           91       178     2012      03        04        064              0.169000       3.157013       0.000000       0.219830   -9999.000000   -9999.000000       0.043500       0.243000
53797     53797     hebei          114.5147       37.2775           91       178     2012      03        05        065              0.168125       4.148346       0.255597       0.225388       0.101000   -9999.000000       0.054300       0.324000
53797     53797     hebei          114.5147       37.2775           91       178     2012      03        06        066              0.165750       4.511871       0.000000       0.227592       0.092000   -9999.000000       0.050000       0.193000
53797     53797     hebei          114.5147       37.2775           91       178     2012      03        07        067              0.000000       6.377838       0.000000       0.226368       0.091000   -9999.000000       0.020400   -9999.000000
53797     53797     hebei          114.5147       37.2775           91       178     2012      03        08        068              0.168458       7.983826       0.000000       0.225238   -9999.000000   -9999.000000       0.047100       0.338000
53797     53797     hebei          114.5147       37.2775           91       178     2012      03        09        069              0.167250       4.216400       0.000000       0.214631   -9999.000000   -9999.000000       0.038200       0.226000
53797     53797     hebei          114.5147       37.2775           91       178     2012      03        10        070              0.165167       5.219696       0.000000       0.217521       0.072000   -9999.000000       0.047800       0.255000
53797     53797     hebei          114.5147       37.2775           91       178     2012      03        11        071              0.162250       6.206421       0.000000       0.209278       0.080000   -9999.000000   -9999.000000       0.103000
53797     53797     hebei          114.5147       37.2775           91       178     2012      03        12        072              0.161000       4.264832       0.000000       0.204635       0.084000   -9999.000000       0.028800   -9999.000000
53797     53797     hebei          114.5147       37.2775           91       178     2012      03        13        073              0.161375       5.993042       0.000000       0.213406   -9999.000000   -9999.000000       0.031500       0.230000
53797     53797     hebei          114.5147       37.2775           91       178     2012      03        14        074              0.161500      10.682343       0.000000       0.213566   -9999.000000   -9999.000000       0.045700       0.204000
53797     53797     hebei          114.5147       37.2775           91       178     2012      03        15        075              0.159833       8.622925       0.000000       0.209143       0.076500   -9999.000000       0.036200       0.278000
53797     53797     hebei          114.5147       37.2775           91       178     2012      03        16        076              0.161500       6.368988       0.000000       0.210851       0.084500   -9999.000000       0.045000       0.134000
53797     53797     hebei          114.5147       37.2775           91       178     2012      03        17        077              0.161833      11.479492       0.000000       0.209422       0.075000   -9999.000000   -9999.000000   -9999.000000
53797     53797     hebei          114.5147       37.2775           91       178     2012      03        18        078              0.158000      12.570831       0.321526       0.204876       0.090000   -9999.000000       0.025100       0.139000
53797     53797     hebei          114.5147       37.2775           91       178     2012      03        19        079              0.160917       4.435699       0.046410       0.208439   -9999.000000       0.027300       0.065000   -9999.000000
53797     53797     hebei          114.5147       37.2775           91       178     2012      03        20        080              0.162500       3.376862       0.000000       0.216993       0.078000       0.034300       0.048400       0.286000
53797     53797     hebei          114.5147       37.2775           91       178     2012      03        21        081              0.162292       6.154053       1.137579       0.219749       0.117500   -9999.000000       0.068500   -9999.000000
53797     53797     hebei          114.5147       37.2775           91       178     2012      03        22        082              0.207500       5.858063       3.508538       0.224645   -9999.000000   -9999.000000       0.090700       1.000000
53797     53797     hebei          114.5147       37.2775           91       178     2012      03        23        083              0.190833       5.471741       0.056482       0.261039       0.108000   -9999.000000       0.067200       0.451000
53797     53797     hebei          114.5147       37.2775           91       178     2012      03        24        084              0.182958       9.913544       0.000000       0.241935   -9999.000000   -9999.000000   -9999.000000       0.430000
53797     53797     hebei          114.5147       37.2775           91       178     2012      03        25        085              0.000000      13.346466       0.000000       0.228129   -9999.000000       0.040200       0.061800       0.265000
53797     53797     hebei          114.5147       37.2775           91       178     2012      03        26        086              0.175417      12.834595       0.000000       0.220078       0.088000   -9999.000000       0.048500   -9999.000000
53797     53797     hebei          114.5147       37.2775           91       178     2012      03        27        087              0.172042      15.637909       0.000000       0.212059       0.084000   -9999.000000       0.060300       0.330000
53797     53797     hebei          114.5147       37.2775           91       178     2012      03        28        088              0.170250      16.546600       0.084278       0.202342       0.085000   -9999.000000   -9999.000000       0.296000
53797     53797     hebei          114.5147       37.2775           91       178     2012      03        29        089              0.169500      17.491516       0.000000       0.196878       0.084000       0.047000       0.035900       0.387000
53797     53797     hebei          114.5147       37.2775           91       178     2012      03        30        090              0.164458      18.452759       0.000000       0.192579       0.083000   -9999.000000       0.046000       0.248000
53797     53797     hebei          114.5147       37.2775           91       178     2012      03        31        091              0.161208      14.712067       0.296206       0.186903       0.071000   -9999.000000       0.059900   -9999.000000
53797     53797     hebei          114.5147       37.2775           91       178     2012      04        01        092              0.157125      15.854645       0.000000       0.181695       0.095000       0.040000       0.045200       0.300000
53797     53797     hebei          114.5147       37.2775           91       178     2012      04        02        093              0.153417      12.520538       0.587681       0.180904       0.094000   -9999.000000       0.066300       0.230000
53797     53797     hebei          114.5147       37.2775           91       178     2012      04        03        094              0.154042       8.973328       0.000000       0.186618   -9999.000000   -9999.000000   -9999.000000       0.354000
53797     53797     hebei          114.5147       37.2775           91       178     2012      04        04        095              0.153708      15.790955       0.000000       0.182425       0.093000   -9999.000000       0.016900       0.253000
53797     53797     hebei          114.5147       37.2775           91       178     2012      04        05        096              0.150958      18.611084       0.000000       0.174494       0.082000   -9999.000000       0.063100   -9999.000000
53797     53797     hebei          114.5147       37.2775           91       178     2012      04        06        097              0.149208      18.169891       0.000000       0.169499       0.093000   -9999.000000       0.046100       0.417000
53797     53797     hebei          114.5147       37.2775           91       178     2012      04        07        098              0.147375      19.734833       0.000000       0.165998       0.086000       0.034100       0.059800       0.320000
53797     53797     hebei          114.5147       37.2775           91       178     2012      04        08        099              0.145500      20.607391       0.000000       0.164002       0.094000   -9999.000000   -9999.000000       0.416000
53797     53797     hebei          114.5147       37.2775           91       178     2012      04        09        100              0.143625      21.425323       0.422923       0.161813       0.104000   -9999.000000       0.083500       0.297000
53797     53797     hebei          114.5147       37.2775           91       178     2012      04        10        101              0.142250      22.165497       0.369717       0.162078       0.116000   -9999.000000       0.040700   -9999.000000
53797     53797     hebei          114.5147       37.2775           91       178     2012      04        11        102              0.144174      19.554016       8.122309       0.165643       0.130500   -9999.000000       0.110900       0.496000
53797     53797     hebei          114.5147       37.2775           91       178     2012      04        12        103              0.161250      15.850616       0.000000       0.209764       0.132000   -9999.000000       0.073500       0.306000
53797     53797     hebei          114.5147       37.2775           91       178     2012      04        13        104              0.156667      16.821289       0.000000       0.241206       0.114000   -9999.000000       0.077600       0.356000
53797     53797     hebei          114.5147       37.2775           91       178     2012      04        14        105              0.150917      20.997650       0.000000       0.214974       0.107000   -9999.000000   -9999.000000       0.191000
53797     53797     hebei          114.5147       37.2775           91       178     2012      04        15        106              0.146583      22.204437       0.000000       0.197183       0.114000   -9999.000000       0.041600   -9999.000000
53797     53797     hebei          114.5147       37.2775           91       178     2012      04        16        107              0.141087      22.392365       0.000000       0.184936       0.100500   -9999.000000       0.069500       0.197000
53797     53797     hebei          114.5147       37.2775           91       178     2012      04        17        108              0.138167      19.962952       0.000000       0.177193       0.112500       0.021700       0.049100   -9999.000000
53797     53797     hebei          114.5147       37.2775           91       178     2012      04        18        109              0.136500      22.457092       3.922559       0.172286       0.112000   -9999.000000   -9999.000000       0.320000
53797     53797     hebei          114.5147       37.2775           91       178     2012      04        19        110              0.135750      22.656586       0.304255       0.192783       0.114000   -9999.000000       0.058000   -9999.000000
53797     53797     hebei          114.5147       37.2775           91       178     2012      04        20        111              0.135667      22.357056       0.195784       0.213200       0.134000   -9999.000000   -9999.000000       0.272000
53797     53797     hebei          114.5147       37.2775           91       178     2012      04        21        112              0.136083      19.348816       0.000000       0.206554       0.114000   -9999.000000       0.022900       0.391000
53797     53797     hebei          114.5147       37.2775           91       178     2012      04        22        113              0.135333      19.141022       0.140885       0.201163       0.125000   -9999.000000       0.071900       0.332000
53797     53797     hebei          114.5147       37.2775           91       178     2012      04        23        114              0.133708      24.030548       5.891895       0.189106       0.121000   -9999.000000       0.062500       0.396000
53797     53797     hebei          114.5147       37.2775           91       178     2012      04        24        115              0.200667      25.247528      11.701172       0.199375       0.217000       0.067900       0.124800   -9999.000000
53797     53797     hebei          114.5147       37.2775           91       178     2012      04        25        116              0.000000      16.733673       0.000000       0.294041       0.194000       0.173800   -9999.000000       0.900000
53797     53797     hebei          114.5147       37.2775           91       178     2012      04        26        117              0.172708      18.236572       0.000000       0.258645       0.129000   -9999.000000       0.092200       0.508000
53797     53797     hebei          114.5147       37.2775           91       178     2012      04        27        118              0.162750      22.122772       0.000000       0.237507       0.124000   -9999.000000   -9999.000000       0.388000
53797     53797     hebei          114.5147       37.2775           91       178     2012      04        28        119              0.149167      23.892578       0.000000       0.217971       0.106000   -9999.000000       0.081100       0.306000
53797     53797     hebei          114.5147       37.2775           91       178     2012      04        29        120              0.139083      20.150757       0.000000       0.204290       0.112000   -9999.000000       0.062400   -9999.000000
53797     53797     hebei          114.5147       37.2775           91       178     2012      04        30        121              0.132833      20.500732       0.000000       0.195166       0.132000   -9999.000000       0.084000       0.345000
53797     53797     hebei          114.5147       37.2775           91       178     2012      05        01        122              0.126500      23.966278       0.000000       0.188922       0.174000   -9999.000000   -9999.000000       0.397000
53797     53797     hebei          114.5147       37.2775           91       178     2012      05        02        123              0.117458      25.074097       0.000000       0.183975       0.150000       0.062200       0.050600       0.391000
53797     53797     hebei          114.5147       37.2775           91       178     2012      05        03        124              0.105667      26.799469       0.617128       0.175624       0.130000       0.100800       0.095500       0.373000
53797     53797     hebei          114.5147       37.2775           91       178     2012      05        04        125              0.091708      27.407898       0.000000       0.167808       0.134000       0.093200       0.079200   -9999.000000
53797     53797     hebei          114.5147       37.2775           91       178     2012      05        05        126              0.081125      29.419098       0.000000       0.162202       0.146000   -9999.000000       0.075400       0.436000
53797     53797     hebei          114.5147       37.2775           91       178     2012      05        06        127              0.072958      27.485016       0.000000       0.160059       0.153000   -9999.000000       0.091600       0.383000
53797     53797     hebei          114.5147       37.2775           91       178     2012      05        07        128              0.069417      31.099121       0.000000       0.158566   -9999.000000   -9999.000000   -9999.000000       0.377000
53797     53797     hebei          114.5147       37.2775           91       178     2012      05        08        129              0.065958      28.778687       0.000000       0.158770       0.141500       0.117300       0.027800       0.324000
53797     53797     hebei          114.5147       37.2775           91       178     2012      05        09        130              0.064000      27.684937       0.999839       0.157177       0.145000   -9999.000000       0.084400   -9999.000000
53797     53797     hebei          114.5147       37.2775           91       178     2012      05        10        131              0.063875      25.263214       0.000000       0.170245       0.148000   -9999.000000       0.062200       0.437000
53797     53797     hebei          114.5147       37.2775           91       178     2012      05        11        132              0.072958      29.008728       9.961399       0.164830       0.267000   -9999.000000       0.072800       0.578000
53797     53797     hebei          114.5147       37.2775           91       178     2012      05        12        133              0.129167      24.966675       0.000000       0.210508       0.173500   -9999.000000   -9999.000000       0.769000
53797     53797     hebei          114.5147       37.2775           91       178     2012      05        13        134              0.121167      22.045135       0.000000       0.243608       0.162500       0.137400       0.060000       0.403000
53797     53797     hebei          114.5147       37.2775           91       178     2012      05        14        135              0.107250      23.660828       0.139277       0.216814       0.139000   -9999.000000       0.065800   -9999.000000
53797     53797     hebei          114.5147       37.2775           91       178     2012      05        15        136              0.091500      24.043457       0.000000       0.195203       0.149000   -9999.000000       0.096900       0.279000
53797     53797     hebei          114.5147       37.2775           91       178     2012      05        16        137              0.079625      25.067627       0.000000       0.177261       0.164000       0.099100       0.078400   -9999.000000
53797     53797     hebei          114.5147       37.2775           91       178     2012      05        17        138              0.071042      25.806610       0.000000       0.166334       0.143000       0.103600       0.088500       0.411000
53797     53797     hebei          114.5147       37.2775           91       178     2012      05        18        139              0.066708      29.216339       0.000000       0.159296       0.156000       0.087300   -9999.000000   -9999.000000
53797     53797     hebei          114.5147       37.2775           91       178     2012      05        19        140              0.064583      30.131378       0.000000       0.157460       0.151000   -9999.000000       0.043300       0.426000
53797     53797     hebei          114.5147       37.2775           91       178     2012      05        20        141              0.063333      29.838043       1.829525       0.156475       0.136000       0.267500       0.100100       0.507000
53797     53797     hebei          114.5147       37.2775           91       178     2012      05        21        142              0.061250      28.236481       0.665738       0.175652       0.164000       0.120000       0.073200       0.384000
53797     53797     hebei          114.5147       37.2775           91       178     2012      05        22        143              0.060708      24.591858       0.000000       0.175873       0.156000   -9999.000000       0.094100       0.375000
53797     53797     hebei          114.5147       37.2775           91       178     2012      05        23        144              0.060542      25.358887      24.660587       0.166877   -9999.000000       0.021400       0.089300   -9999.000000
53797     53797     hebei          114.5147       37.2775           91       178     2012      05        24        145              0.059708      26.328979       6.274590       0.158853       0.125000   -9999.000000   -9999.000000       0.414000
53797     53797     hebei          114.5147       37.2775           91       178     2012      05        25        146              0.000000      28.039673      11.176657       0.152742       0.116000   -9999.000000       0.040400       0.382000
53797     53797     hebei          114.5147       37.2775           91       178     2012      05        26        147              0.057750      27.841309       0.000000       0.150641       0.141000   -9999.000000       0.094500       0.481000
53797     53797     hebei          114.5147       37.2775           91       178     2012      05        27        148              0.057250      30.141357       0.000000       0.148612       0.155000   -9999.000000       0.074400       0.445000
53797     53797     hebei          114.5147       37.2775           91       178     2012      05        28        149              0.056125      32.103058       0.000000       0.146827       0.120000   -9999.000000       0.087500   -9999.000000
53797     53797     hebei          114.5147       37.2775           91       178     2012      05        29        150              0.054042      30.894928       1.098152       0.146979       0.137000   -9999.000000   -9999.000000       0.497000
53797     53797     hebei          114.5147       37.2775           91       178     2012      05        30        151              0.053333      27.076843       0.000000       0.156364       0.145000       0.130400       0.072800   -9999.000000
53797     53797     hebei          114.5147       37.2775           91       178     2012      05        31        152              0.052792      27.468109      22.841684       0.152794       0.158000       0.060500   -9999.000000   -9999.000000
53797     53797     hebei          114.5147       37.2775           91       178     2012      06        01        153              0.051458      27.099640       1.848151       0.148222       0.187000   -9999.000000       0.101700       0.663000
53797     53797     hebei          114.5147       37.2775           91       178     2012      06        02        154              0.051750      25.123444       3.398721       0.167310       0.133500   -9999.000000       0.082400   -9999.000000
53797     53797     hebei          114.5147       37.2775           91       178     2012      06        03        155              0.051167      25.918579      13.814710       0.165615       0.175000       0.109300       0.110900       0.578000
53797     53797     hebei          114.5147       37.2775           91       178     2012      06        04        156              0.053125      24.989197       0.000000       0.283734       0.129000   -9999.000000   -9999.000000       0.587000
53797     53797     hebei          114.5147       37.2775           91       178     2012      06        05        157              0.053167      28.374207       0.169888       0.233422       0.137000       0.207100       0.034000       0.629000
53797     53797     hebei          114.5147       37.2775           91       178     2012      06        06        158              0.051833      29.226898       0.000000       0.200950       0.154000   -9999.000000       0.078900       0.455000
53797     53797     hebei          114.5147       37.2775           91       178     2012      06        07        159              0.052125      26.619659       2.073720       0.189005       0.188000       0.350500       0.067000   -9999.000000
53797     53797     hebei          114.5147       37.2775           91       178     2012      06        08        160              0.052208      28.682526       0.000000       0.193545       0.151000       0.061900       0.077000       0.367000
53797     53797     hebei          114.5147       37.2775           91       178     2012      06        09        161              0.053042      29.749512       0.735783       0.179740       0.132000       0.226000       0.076600       0.529000
53797     53797     hebei          114.5147       37.2775           91       178     2012      06        10        162              0.051522      32.700775       0.000000       0.164377       0.148000       0.045600       0.077100       0.536000
53797     53797     hebei          114.5147       37.2775           91       178     2012      06        11        163              0.000000      28.315918       0.000000       0.158621       0.136000   -9999.000000       0.039100       0.419000
53797     53797     hebei          114.5147       37.2775           91       178     2012      06        12        164              0.051000      31.456512       0.000000       0.150882       0.137000       0.134200       0.078200   -9999.000000
53797     53797     hebei          114.5147       37.2775           91       178     2012      06        13        165              0.050167      31.621704       0.273689       0.148359       0.124000       0.104800       0.060400       0.426000
53797     53797     hebei          114.5147       37.2775           91       178     2012      06        14        166              0.050190      31.153351       0.000000       0.150067       0.115000   -9999.000000       0.081800   -9999.000000
53797     53797     hebei          114.5147       37.2775           91       178     2012      06        15        167              0.048708      30.653168       0.000000       0.147079       0.124000       0.169500   -9999.000000       0.416000
53797     53797     hebei          114.5147       37.2775           91       178     2012      06        16        168              0.048417      30.930939       0.000000       0.145385       0.152000   -9999.000000       0.065700   -9999.000000
53797     53797     hebei          114.5147       37.2775           91       178     2012      06        17        169              0.046625      34.006439       0.000000       0.143925       0.176000   -9999.000000       0.069800       0.583000
53797     53797     hebei          114.5147       37.2775           91       178     2012      06        18        170              0.044625      35.229950       0.000000       0.142930       0.125500       0.089300       0.068700       0.475000
53797     53797     hebei          114.5147       37.2775           91       178     2012      06        19        171              0.043167      34.620575       0.000000       0.142797       0.152500   -9999.000000       0.063400       0.547000
53797     53797     hebei          114.5147       37.2775           91       178     2012      06        20        172              0.040542      35.219208       0.000000       0.142021       0.153000       0.249800       0.060300       0.543000
53797     53797     hebei          114.5147       37.2775           91       178     2012      06        21        173              0.043625      32.602081       6.434800       0.142457   -9999.000000   -9999.000000   -9999.000000   -9999.000000
53797     53797     hebei          114.5147       37.2775           91       178     2012      06        22        174              0.054292      31.300964       3.067400       0.205077       0.159000   -9999.000000       0.035600       0.805000
53797     53797     hebei          114.5147       37.2775           91       178     2012      06        23        175              0.059625      30.958679       0.000000       0.196121       0.137500   -9999.000000       0.071200       0.547000
53797     53797     hebei          114.5147       37.2775           91       178     2012      06        24        176              0.101708      31.899506      18.389172       0.168372       0.198000   -9999.000000       0.082100       0.609000
53797     53797     hebei          114.5147       37.2775           91       178     2012      06        25        177              0.160792      26.713989       0.778244       0.308884       0.167000       0.237900       0.109400       0.742000
53797     53797     hebei          114.5147       37.2775           91       178     2012      06        26        178              0.183125      27.697449      25.468332       0.262896       0.177000   -9999.000000       0.106200   -9999.000000
53797     53797     hebei          114.5147       37.2775           91       178     2012      06        27        179              0.175667      27.948578       7.459575       0.305852       0.174000       0.219600       0.102600       1.000000
53797     53797     hebei          114.5147       37.2775           91       178     2012      06        28        180              0.172708      26.582245      19.705729       0.295885       0.258000       0.228000       0.080900       0.908000
53797     53797     hebei          114.5147       37.2775           91       178     2012      06        29        181              0.223375      25.492554      10.986530       0.307951       0.243000   -9999.000000       0.109600       1.000000
53797     53797     hebei          114.5147       37.2775           91       178     2012      06        30        182              0.189917      24.780243       0.000000       0.335994       0.160000   -9999.000000       0.103300   -9999.000000
53797     53797     hebei          114.5147       37.2775           91       178     2012      07        01        183              0.171708      28.874176       0.000000       0.300453       0.166000       0.274100       0.097200   -9999.000000
53797     53797     hebei          114.5147       37.2775           91       178     2012      07        02        184              0.157542      30.984589       0.000000       0.278130       0.200000   -9999.000000   -9999.000000       0.958000
53797     53797     hebei          114.5147       37.2775           91       178     2012      07        03        185              0.145792      30.147675       0.944753       0.262014       0.194000       0.241600       0.060900       0.711000
53797     53797     hebei          114.5147       37.2775           91       178     2012      07        04        186              0.146917      31.801056      24.801348       0.250782       0.183000   -9999.000000       0.108400       0.774000
53797     53797     hebei          114.5147       37.2775           91       178     2012      07        05        187              0.161375      28.314453       0.262281       0.293295       0.187000       0.169100       0.091300       0.900000
53797     53797     hebei          114.5147       37.2775           91       178     2012      07        06        188              0.145208      28.898224       0.000000       0.302706   -9999.000000       0.184200       0.083400   -9999.000000
53797     53797     hebei          114.5147       37.2775           91       178     2012      07        07        189              0.138667      29.684326       4.103002       0.279541   -9999.000000   -9999.000000       0.099700       0.978000
53797     53797     hebei          114.5147       37.2775           91       178     2012      07        08        190              0.140500      28.501526       3.130582       0.287710       0.260000   -9999.000000   -9999.000000       0.973000
53797     53797     hebei          114.5147       37.2775           91       178     2012      07        09        191              0.216625      27.675629      52.171104       0.291162       0.258000       0.134600       0.067100       1.000000
53797     53797     hebei          114.5147       37.2775           91       178     2012      07        10        192              0.212250      26.414337       0.329157       0.362782       0.201000       0.366700       0.108000       0.914000
53797     53797     hebei          114.5147       37.2775           91       178     2012      07        11        193              0.191875      29.682770       0.000000       0.328095       0.178000       0.249800       0.087300   -9999.000000
53797     53797     hebei          114.5147       37.2775           91       178     2012      07        12        194              0.215250      31.542450      15.559291       0.306788       0.173000   -9999.000000       0.093100       1.000000
53797     53797     hebei          114.5147       37.2775           91       178     2012      07        13        195              0.221167      30.622040       8.447851       0.335084       0.227000   -9999.000000   -9999.000000   -9999.000000
53797     53797     hebei          114.5147       37.2775           91       178     2012      07        14        196              0.209458      26.031342       3.374308       0.328859       0.250000       0.329100       0.102700       0.797000
53797     53797     hebei          114.5147       37.2775           91       178     2012      07        15        197              0.197208      26.299561       0.000000       0.317728       0.204000   -9999.000000       0.064000   -9999.000000
53797     53797     hebei          114.5147       37.2775           91       178     2012      07        16        198              0.187375      27.664795       0.000000       0.301644       0.164000       0.167600       0.105300       0.930000
53797     53797     hebei          114.5147       37.2775           91       178     2012      07        17        199              0.179833      28.525726       0.459525       0.289065       0.162000   -9999.000000       0.090400       0.746000
53797     53797     hebei          114.5147       37.2775           91       178     2012      07        18        200              0.176042      28.959412       0.000000       0.279488       0.210000       0.125000       0.097300       0.909000
53797     53797     hebei          114.5147       37.2775           91       178     2012      07        19        201              0.172000      29.434082       0.000000       0.270685       0.194000       0.114200   -9999.000000       0.760000
53797     53797     hebei          114.5147       37.2775           91       178     2012      07        20        202              0.168261      30.518433       1.263591       0.262170       0.153500   -9999.000000       0.068800   -9999.000000
53797     53797     hebei          114.5147       37.2775           91       178     2012      07        21        203              0.180250      30.804077       2.492850       0.256369       0.229500       0.199500       0.102000       0.868000
53797     53797     hebei          114.5147       37.2775           91       178     2012      07        22        204              0.175708      29.910583       1.507677       0.269506       0.176000   -9999.000000       0.076200       0.830000
53797     53797     hebei          114.5147       37.2775           91       178     2012      07        23        205              0.165000      30.222260       0.000000       0.254076       0.179000       0.162300       0.088400       0.850000
53797     53797     hebei          114.5147       37.2775           91       178     2012      07        24        206              0.159083      29.477539       0.342228       0.242616       0.225000       0.055000       0.101600       0.694000
53797     53797     hebei          114.5147       37.2775           91       178     2012      07        25        207              0.152917      31.208496       0.717785       0.231880       0.198500   -9999.000000   -9999.000000   -9999.000000
53797     53797     hebei          114.5147       37.2775           91       178     2012      07        26        208              0.241875      31.590027      77.832794       0.228232       0.198000       0.110100       0.090400       0.934000
53797     53797     hebei          114.5147       37.2775           91       178     2012      07        27        209              0.236958      30.487183       1.050745       0.415589       0.207000       0.123000       0.136100       1.000000
53797     53797     hebei          114.5147       37.2775           91       178     2012      07        28        210              0.215500      29.034973       0.110672       0.341648       0.191000       0.198800       0.102600       1.000000
53797     53797     hebei          114.5147       37.2775           91       178     2012      07        29        211              0.202875      31.804657       2.140245       0.311424       0.231000       0.079400       0.113800       0.820000
53797     53797     hebei          114.5147       37.2775           91       178     2012      07        30        212              0.246125      32.347015       8.181130       0.296229   -9999.000000   -9999.000000   -9999.000000   -9999.000000
53797     53797     hebei          114.5147       37.2775           91       178     2012      07        31        213              0.248625      27.131531      15.296700       0.309873       0.308000   -9999.000000       0.116300       1.000000
53797     53797     hebei          114.5147       37.2775           91       178     2012      08        01        214              0.223250      23.363617       0.570769       0.341030       0.282500       0.147400       0.096000       0.917000
53797     53797     hebei          114.5147       37.2775           91       178     2012      08        02        215              0.211625      25.960205       0.000000       0.316479       0.237000   -9999.000000       0.125600       0.967000
53797     53797     hebei          114.5147       37.2775           91       178     2012      08        03        216              0.203042      28.016724       0.232381       0.303806       0.283000       0.109200       0.102800       0.810000
53797     53797     hebei          114.5147       37.2775           91       178     2012      08        04        217              0.207958      27.915833       4.314231       0.296725       0.312000   -9999.000000       0.114000   -9999.000000
53797     53797     hebei          114.5147       37.2775           91       178     2012      08        05        218              0.247375      29.678284      10.238947       0.296547       0.248000       0.283900   -9999.000000       0.974000
53797     53797     hebei          114.5147       37.2775           91       178     2012      08        06        219              0.221583      26.917755       0.209755       0.322887       0.265000       0.109000       0.083900       0.828000
53797     53797     hebei          114.5147       37.2775           91       178     2012      08        07        220              0.211917      29.160431       0.000000       0.301580       0.208000   -9999.000000   -9999.000000       0.880000
53797     53797     hebei          114.5147       37.2775           91       178     2012      08        08        221              0.204500      30.707031       1.437803       0.289966       0.209000       0.137000       0.103200       0.797000
53797     53797     hebei          114.5147       37.2775           91       178     2012      08        09        222              0.199333      30.224335       0.713976       0.286957       0.288000   -9999.000000       0.136200   -9999.000000
53797     53797     hebei          114.5147       37.2775           91       178     2012      08        10        223              0.192125      28.896759       0.000000       0.283907       0.266000       0.122500       0.129300       0.779000
53797     53797     hebei          114.5147       37.2775           91       178     2012      08        11        224              0.188333      29.435150      22.253065       0.270078       0.242500       0.032400       0.153600   -9999.000000
53797     53797     hebei          114.5147       37.2775           91       178     2012      08        12        225              0.187000      29.677734       3.283057       0.298945       0.266000   -9999.000000       0.089800       0.757000
53797     53797     hebei          114.5147       37.2775           91       178     2012      08        13        226              0.183833      24.469086       0.672723       0.318896       0.235000   -9999.000000       0.174000   -9999.000000
53797     53797     hebei          114.5147       37.2775           91       178     2012      08        14        227              0.199917      26.540802       5.663448       0.301285       0.315000   -9999.000000       0.161800       1.000000
53797     53797     hebei          114.5147       37.2775           91       178     2012      08        15        228              0.193375      22.526459       0.000000       0.313928       0.283000       0.225400       0.166900       0.792000
53797     53797     hebei          114.5147       37.2775           91       178     2012      08        16        229              0.182167      26.383698       0.000000       0.295713       0.209000       0.149700   -9999.000000       0.857000
53797     53797     hebei          114.5147       37.2775           91       178     2012      08        17        230              0.204583      27.652039      18.780886       0.284570       0.215000   -9999.000000       0.154800       1.000000
53797     53797     hebei          114.5147       37.2775           91       178     2012      08        18        231              0.240208      26.643036       2.799822       0.313753   -9999.000000   -9999.000000       0.157200   -9999.000000
53797     53797     hebei          114.5147       37.2775           91       178     2012      08        19        232              0.217833      25.991364       0.000000       0.328404       0.230000       0.168300       0.185500       0.965000
53797     53797     hebei          114.5147       37.2775           91       178     2012      08        20        233              0.211667      28.291870       3.938166       0.306599   -9999.000000       0.143600       0.148000       0.869000
53797     53797     hebei          114.5147       37.2775           91       178     2012      08        21        234              0.218542      27.900696       0.000000       0.302042       0.253500       0.169400       0.167900       0.913000
53797     53797     hebei          114.5147       37.2775           91       178     2012      08        22        235              0.200542      25.120605       0.000000       0.299622       0.253000   -9999.000000   -9999.000000   -9999.000000
53797     53797     hebei          114.5147       37.2775           91       178     2012      08        23        236              0.189625      25.465515       0.000000       0.286017       0.228000       0.119200       0.086100   -9999.000000
53797     53797     hebei          114.5147       37.2775           91       178     2012      08        24        237              0.183333      24.119171       0.000000       0.279629       0.221000       0.078500       0.174700       0.869000
53797     53797     hebei          114.5147       37.2775           91       178     2012      08        25        238              0.000000      24.911285       0.000000       0.271252       0.267000   -9999.000000       0.128500       0.726000
53797     53797     hebei          114.5147       37.2775           91       178     2012      08        26        239              0.178000      26.329346       0.000000       0.265310       0.288000       0.158000       0.162900       0.824000
53797     53797     hebei          114.5147       37.2775           91       178     2012      08        27        240              0.174458      27.457092      11.245967       0.259392       0.243000   -9999.000000       0.151600       0.626000
53797     53797     hebei          114.5147       37.2775           91       178     2012      08        28        241              0.172833      27.690918       0.000000       0.255151       0.236000       0.188900       0.155300   -9999.000000
53797     53797     hebei          114.5147       37.2775           91       178     2012      08        29        242              0.171292      28.311432       0.000000       0.248424       0.207000       0.110500       0.102000       0.915000
53797     53797     hebei          114.5147       37.2775           91       178     2012      08        30        243              0.168208      29.338928       0.062799       0.236454       0.287000   -9999.000000       0.161200       0.803000
53797     53797     hebei          114.5147       37.2775           91       178     2012      08        31        244              0.165125      29.997955       0.291097       0.228978       0.274000       0.182200       0.129400       0.784000
53797     53797     hebei          114.5147       37.2775           91       178     2012      09        01        245              0.217667      28.355988      27.192310       0.234610       0.279000       0.055500       0.159700       0.912000
53797     53797     hebei          114.5147       37.2775           91       178     2012      09        02        246              0.238583      26.421661       0.601569       0.322627       0.251000       0.391400   -9999.000000   -9999.000000
53797     53797     hebei          114.5147       37.2775           91       178     2012      09        03        247              0.212875      24.713104       0.968765       0.308922       0.196000       0.173000       0.118800       0.829000
53797     53797     hebei          114.5147       37.2775           91       178     2012      09        04        248              0.199958      24.163025       0.478801       0.286966       0.203000   -9999.000000       0.158100       0.705000
53797     53797     hebei          114.5147       37.2775           91       178     2012      09        05        249              0.197333      23.770447      12.673338       0.275338   -9999.000000       0.300000       0.198500       0.907000
53797     53797     hebei          114.5147       37.2775           91       178     2012      09        06        250              0.245958      20.915131       9.707599       0.304182       0.278000       0.233300       0.156500       0.945000
53797     53797     hebei          114.5147       37.2775           91       178     2012      09        07        251              0.224667      20.264130       0.000000       0.332258       0.251000   -9999.000000       0.183600   -9999.000000
53797     53797     hebei          114.5147       37.2775           91       178     2012      09        08        252              0.211667      22.408386       0.000000       0.309709       0.224000       0.257200   -9999.000000       0.835000
53797     53797     hebei          114.5147       37.2775           91       178     2012      09        09        253              0.202542      23.550049       0.000000       0.298862       0.200000   -9999.000000       0.088600   -9999.000000
53797     53797     hebei          114.5147       37.2775           91       178     2012      09        10        254              0.197417      24.890137       2.602412       0.289070   -9999.000000       0.175500       0.172900       0.716000
53797     53797     hebei          114.5147       37.2775           91       178     2012      09        11        255              0.197375      24.745239       0.897139       0.289049       0.221000       0.183000       0.140400   -9999.000000
53797     53797     hebei          114.5147       37.2775           91       178     2012      09        12        256              0.186417      23.985382       0.000000       0.291059       0.185500       0.095100       0.152200       0.859000
53797     53797     hebei          114.5147       37.2775           91       178     2012      09        13        257              0.190042      21.651215       0.000000       0.278912       0.202500       0.097800   -9999.000000       0.590000
53797     53797     hebei          114.5147       37.2775           91       178     2012      09        14        258              0.185208      21.959686       0.000000       0.270907       0.188000   -9999.000000       0.158200       0.724000
53797     53797     hebei          114.5147       37.2775           91       178     2012      09        15        259              0.177667      21.130768       0.000000       0.263626   -9999.000000       0.223800       0.086400       0.590000
53797     53797     hebei          114.5147       37.2775           91       178     2012      09        16        260              0.175875      21.544098       0.000000       0.257699       0.240000       0.092800       0.160400   -9999.000000
53797     53797     hebei          114.5147       37.2775           91       178     2012      09        17        261              0.176292      21.441772       0.000000       0.252010       0.211000   -9999.000000       0.102300       0.675000
53797     53797     hebei          114.5147       37.2775           91       178     2012      09        18        262              0.171542      22.683746       0.000000       0.246785       0.213000   -9999.000000       0.122700       0.677000
53797     53797     hebei          114.5147       37.2775           91       178     2012      09        19        263              0.166792      23.411224      17.877316       0.241918       0.176000   -9999.000000   -9999.000000       0.784000
53797     53797     hebei          114.5147       37.2775           91       178     2012      09        20        264              0.164333      21.986420       0.066053       0.242084       0.195000       0.116200       0.079800       0.626000
53797     53797     hebei          114.5147       37.2775           91       178     2012      09        21        265              0.162625      23.570068       1.703601       0.237704   -9999.000000       0.065400       0.136600   -9999.000000
53797     53797     hebei          114.5147       37.2775           91       178     2012      09        22        266              0.164292      21.213531       0.000000       0.254429       0.229000   -9999.000000       0.110600       0.827000
53797     53797     hebei          114.5147       37.2775           91       178     2012      09        23        267              0.161083      23.364380       0.000000       0.246409       0.190500   -9999.000000       0.112500       0.747000
53797     53797     hebei          114.5147       37.2775           91       178     2012      09        24        268              0.158625      23.507172       0.000000       0.240672       0.215500   -9999.000000       0.125000       0.774000
53797     53797     hebei          114.5147       37.2775           91       178     2012      09        25        269              0.156542      23.791199       7.483147       0.235020       0.210000       0.153400   -9999.000000       0.736000
53797     53797     hebei          114.5147       37.2775           91       178     2012      09        26        270              0.161292      22.830841       0.000000       0.264731   -9999.000000       0.123600       0.065700   -9999.000000
53797     53797     hebei          114.5147       37.2775           91       178     2012      09        27        271              0.162143      21.877594       0.000000       0.265466       0.232000   -9999.000000       0.132100       0.826000
53797     53797     hebei          114.5147       37.2775           91       178     2012      09        28        272              0.151800      22.155914       0.000000       0.250860       0.190000   -9999.000000       0.106900       0.504000
53797     53797     hebei          114.5147       37.2775           91       178     2012      09        29        273              0.150875      19.224182       0.000000       0.240113       0.221000   -9999.000000       0.128900       0.721000
53797     53797     hebei          114.5147       37.2775           91       178     2012      09        30        274              0.148875      19.273438       0.000000       0.233173       0.202000   -9999.000000   -9999.000000       0.491000
53797     53797     hebei          114.5147       37.2775           91       178     2012      10        01        275              0.147333      19.743286       0.000000       0.227241       0.141000   -9999.000000       0.076800   -9999.000000
53797     53797     hebei          114.5147       37.2775           91       178     2012      10        02        276              0.145167      20.885712       0.000000       0.221655       0.159000   -9999.000000       0.061300       0.522000
53797     53797     hebei          114.5147       37.2775           91       178     2012      10        03        277              0.142542      22.402710       0.000000       0.216829       0.162000       0.198600       0.097700       0.586000
53797     53797     hebei          114.5147       37.2775           91       178     2012      10        04        278              0.140750      21.790497       0.277753       0.212050       0.159500       0.017300       0.079600       0.641000
53797     53797     hebei          114.5147       37.2775           91       178     2012      10        05        279              0.139708      20.640961       0.060296       0.212190       0.135000       0.134700       0.091900       0.335000
53797     53797     hebei          114.5147       37.2775           91       178     2012      10        06        280              0.137708      20.376190       0.000000       0.209908       0.143000       0.132700   -9999.000000   -9999.000000
53797     53797     hebei          114.5147       37.2775           91       178     2012      10        07        281              0.136708      20.803009       0.000000       0.205095       0.162000   -9999.000000       0.046000       0.451000
53797     53797     hebei          114.5147       37.2775           91       178     2012      10        08        282              0.136500      20.874603       0.063596       0.203459       0.156000   -9999.000000       0.092300   -9999.000000
53797     53797     hebei          114.5147       37.2775           91       178     2012      10        09        283              0.134917      21.986603       0.000000       0.201906       0.131000       0.118800       0.065800       0.486000
53797     53797     hebei          114.5147       37.2775           91       178     2012      10        10        284              0.130875      20.308167       0.000000       0.195893       0.143000   -9999.000000       0.083800   -9999.000000
53797     53797     hebei          114.5147       37.2775           91       178     2012      10        11        285              0.129167      18.805603       0.000000       0.192318       0.114000   -9999.000000       0.083100       0.436000
53797     53797     hebei          114.5147       37.2775           91       178     2012      10        12        286              0.129250      19.719543       0.000000       0.191265       0.122000   -9999.000000   -9999.000000       0.469000
53797     53797     hebei          114.5147       37.2775           91       178     2012      10        13        287              0.125792      20.883850       0.000000       0.190556       0.128000       0.213400       0.037400       0.574000
53797     53797     hebei          114.5147       37.2775           91       178     2012      10        14        288              0.124500      18.425995       0.064347       0.188433       0.132000       0.119000       0.090000       0.472000
53797     53797     hebei          114.5147       37.2775           91       178     2012      10        15        289              0.123042      17.860626       0.251052       0.187273       0.139500   -9999.000000       0.063600   -9999.000000
53797     53797     hebei          114.5147       37.2775           91       178     2012      10        16        290              0.120583      16.350311       0.000000       0.190744       0.121000   -9999.000000       0.077700       0.539000
53797     53797     hebei          114.5147       37.2775           91       178     2012      10        17        291              0.118167      15.146179       0.000000       0.193522       0.122000       0.045300   -9999.000000       0.425000
53797     53797     hebei          114.5147       37.2775           91       178     2012      10        18        292              0.117625      15.277557       0.000000       0.190252       0.136000       0.285400       0.063000       0.560000
53797     53797     hebei          114.5147       37.2775           91       178     2012      10        19        293              0.117167      16.461395       0.000000       0.189283       0.140000   -9999.000000       0.059400       0.474000
53797     53797     hebei          114.5147       37.2775           91       178     2012      10        20        294              0.117042      16.957855       0.000000       0.188985       0.122000   -9999.000000       0.082700   -9999.000000
53797     53797     hebei          114.5147       37.2775           91       178     2012      10        21        295              0.115500      18.659607       1.558803       0.188320       0.132000   -9999.000000       0.067500       0.523000
53797     53797     hebei          114.5147       37.2775           91       178     2012      10        22        296              0.116875      14.283905       0.000000       0.205415   -9999.000000       0.098900       0.072300       0.466000
53797     53797     hebei          114.5147       37.2775           91       178     2012      10        23        297              0.117083      14.240814       0.000000       0.205794   -9999.000000   -9999.000000   -9999.000000       0.567000
53797     53797     hebei          114.5147       37.2775           91       178     2012      10        24        298              0.117333      15.116302       0.000000       0.201725   -9999.000000       0.056600       0.033200       0.413000
53797     53797     hebei          114.5147       37.2775           91       178     2012      10        25        299              0.000000      16.837799       0.000000       0.198090       0.110000   -9999.000000       0.076500   -9999.000000
53797     53797     hebei          114.5147       37.2775           91       178     2012      10        26        300              0.115125      16.701813       0.000000       0.195241       0.134000       0.046100       0.062600       0.596000
53797     53797     hebei          114.5147       37.2775           91       178     2012      10        27        301              0.115625      15.322449       0.000000       0.196290       0.119000       0.080200       0.074400       0.535000
53797     53797     hebei          114.5147       37.2775           91       178     2012      10        28        302              0.000000      16.985504       0.000000       0.194861       0.121000   -9999.000000       0.077500       0.523000
53797     53797     hebei          114.5147       37.2775           91       178     2012      10        29        303              0.113667      14.541473       0.000000       0.192632       0.136000   -9999.000000       0.072200       0.358000
53797     53797     hebei          114.5147       37.2775           91       178     2012      10        30        304              0.111208      13.852386       0.000000       0.193710   -9999.000000   -9999.000000       0.025100   -9999.000000
53797     53797     hebei          114.5147       37.2775           91       178     2012      10        31        305              0.109250      12.129578       0.000000       0.193352       0.093000   -9999.000000       0.068700       0.276000
53797     53797     hebei          114.5147       37.2775           91       178     2012      11        01        306              0.108875      11.244202       0.000000       0.192562       0.114500       0.099900       0.053900       0.437000
53797     53797     hebei          114.5147       37.2775           91       178     2012      11        02        307              0.108333      11.959442       0.000000       0.193128       0.108000   -9999.000000       0.066200       0.458000
53797     53797     hebei          114.5147       37.2775           91       178     2012      11        03        308              0.113583      12.099335      17.087185       0.194686   -9999.000000       0.259600   -9999.000000       0.572000
53797     53797     hebei          114.5147       37.2775           91       178     2012      11        04        309              0.117167       8.103455       0.000000       0.303665   -9999.000000       0.328500       0.050600   -9999.000000
53797     53797     hebei          114.5147       37.2775           91       178     2012      11        05        310              0.117292       6.495819       0.509758       0.275811       0.102000   -9999.000000       0.085700       0.353000
53797     53797     hebei          114.5147       37.2775           91       178     2012      11        06        311              0.116708       8.718079       0.000000       0.264590       0.120000       0.209100       0.064100   -9999.000000
53797     53797     hebei          114.5147       37.2775           91       178     2012      11        07        312              0.115792       9.891205       0.043577       0.258951       0.119000   -9999.000000       0.070100       0.346000
53797     53797     hebei          114.5147       37.2775           91       178     2012      11        08        313              0.114958       8.974670       0.000000       0.256800       0.128000       0.154500   -9999.000000   -9999.000000
53797     53797     hebei          114.5147       37.2775           91       178     2012      11        09        314              0.115000       9.190979       1.522945       0.252849       0.170000       0.145700   -9999.000000       0.408000
53797     53797     hebei          114.5147       37.2775           91       178     2012      11        10        315              0.122667       9.297119       5.553699       0.256128   -9999.000000   -9999.000000       0.084300       0.652000
53797     53797     hebei          114.5147       37.2775           91       178     2012      11        11        316              0.126958       6.875061       0.000000       0.289196       0.140000   -9999.000000       0.086700       0.621000
53797     53797     hebei          114.5147       37.2775           91       178     2012      11        12        317              0.124792       6.451294       0.000000       0.270328       0.123000   -9999.000000       0.063300       0.404000
53797     53797     hebei          114.5147       37.2775           91       178     2012      11        13        318              0.000000       7.421936       0.000000       0.265033       0.122000   -9999.000000       0.079500   -9999.000000
53797     53797     hebei          114.5147       37.2775           91       178     2012      11        14        319              0.119625       6.610626       0.125369       0.259647   -9999.000000       0.037500   -9999.000000       0.461000
53797     53797     hebei          114.5147       37.2775           91       178     2012      11        15        320              0.118917       5.456116       1.445663       0.254919   -9999.000000   -9999.000000       0.074400       0.369000
53797     53797     hebei          114.5147       37.2775           91       178     2012      11        16        321              0.118792       5.978302       0.114377       0.262836       0.101000       0.165100       0.036900       0.478000
53797     53797     hebei          114.5147       37.2775           91       178     2012      11        17        322              0.000000       6.158966       0.000000       0.261883       0.110000   -9999.000000       0.082100       0.340000
53797     53797     hebei          114.5147       37.2775           91       178     2012      11        18        323              0.116792       6.927094       0.000000       0.258600       0.113000       0.117200       0.061700   -9999.000000
53797     53797     hebei          114.5147       37.2775           91       178     2012      11        19        324              0.115792       6.806427       0.000000       0.256909       0.117000       0.172100       0.071300       0.460000
53797     53797     hebei          114.5147       37.2775           91       178     2012      11        20        325              0.115458       6.097351       0.000000       0.254868   -9999.000000   -9999.000000   -9999.000000       0.313000
53797     53797     hebei          114.5147       37.2775           91       178     2012      11        21        326              0.115292       5.270325       0.000000       0.255185       0.079000       0.305300       0.031100       0.460000
53797     53797     hebei          114.5147       37.2775           91       178     2012      11        22        327              0.114167       6.258179       0.000000       0.255000       0.109000   -9999.000000       0.070600       0.276000
53797     53797     hebei          114.5147       37.2775           91       178     2012      11        23        328              0.111792       4.611847       0.000000       0.252224       0.104000       0.176400       0.049700   -9999.000000
53797     53797     hebei          114.5147       37.2775           91       178     2012      11        24        329              0.111042       3.188751       0.000000       0.232976       0.105000       0.149800       0.069000       0.467000
53797     53797     hebei          114.5147       37.2775           91       178     2012      11        25        330              0.111958       4.317841       0.139134       0.247403   -9999.000000   -9999.000000       0.070500       0.282000
53797     53797     hebei          114.5147       37.2775           91       178     2012      11        26        331              0.110542       4.264679       0.000000       0.251352   -9999.000000       0.170800   -9999.000000       0.373000
53797     53797     hebei          114.5147       37.2775           91       178     2012      11        27        332              0.111083       4.332184       0.114629       0.242720       0.090000       0.103200       0.017800       0.288000
53797     53797     hebei          114.5147       37.2775           91       178     2012      11        28        333              0.109875       6.099823       0.000000       0.248792       0.092000   -9999.000000       0.067400   -9999.000000
53797     53797     hebei          114.5147       37.2775           91       178     2012      11        29        334              0.106750       3.614899       0.000000       0.235717       0.097000       0.222300       0.045200       0.143000
53797     53797     hebei          114.5147       37.2775           91       178     2012      11        30        335              0.105750       2.184601       0.000000       0.219896   -9999.000000   -9999.000000       0.068600       0.170000
53797     53797     hebei          114.5147       37.2775           91       178     2012      12        01        336              0.102292       0.785736       0.151566       0.202608   -9999.000000   -9999.000000   -9999.000000       0.109000
53797     53797     hebei          114.5147       37.2775           91       178     2012      12        02        337              0.098708      -0.838104       0.000000       0.180282   -9999.000000       0.048400       0.053100       0.107000
53797     53797     hebei          114.5147       37.2775           91       178     2012      12        03        338              0.103000       0.183777       0.099975       0.183163       0.103000   -9999.000000       0.049900   -9999.000000
53797     53797     hebei          114.5147       37.2775           91       178     2012      12        04        339              0.101042       1.321808       0.000000       0.204832       0.103000       0.117500       0.068900       0.127000
53797     53797     hebei          114.5147       37.2775           91       178     2012      12        05        340              0.101000       1.228912       0.015784       0.206535   -9999.000000   -9999.000000       0.052400   -9999.000000
53797     53797     hebei          114.5147       37.2775           91       178     2012      12        06        341              0.095500       0.861694       0.000000       0.199295   -9999.000000   -9999.000000       0.066000       0.152000
53797     53797     hebei          114.5147       37.2775           91       178     2012      12        07        342              0.086174      -1.386749       0.000000       0.170966   -9999.000000       0.076100   -9999.000000   -9999.000000
53797     53797     hebei          114.5147       37.2775           91       178     2012      12        08        343              0.070667      -0.518066       0.000000       0.178650   -9999.000000   -9999.000000       0.026400       0.178000
53797     53797     hebei          114.5147       37.2775           91       178     2012      12        09        344              0.055625      -2.121979       0.000000       0.167179   -9999.000000   -9999.000000       0.068800       0.141000
53797     53797     hebei          114.5147       37.2775           91       178     2012      12        10        345              0.052000      -1.001007       0.000000       0.174932   -9999.000000   -9999.000000       0.044600       0.254000
53797     53797     hebei          114.5147       37.2775           91       178     2012      12        11        346              0.055667      -1.659760       0.000000       0.167775   -9999.000000       0.180200       0.060400       0.159000
53797     53797     hebei          114.5147       37.2775           91       178     2012      12        12        347              0.061292      -1.395203       0.000000       0.164156   -9999.000000   -9999.000000       0.058900   -9999.000000
53797     53797     hebei          114.5147       37.2775           91       178     2012      12        13        348              0.067917      -0.881104       6.689661       0.173825   -9999.000000   -9999.000000       0.062100       0.198000
53797     53797     hebei          114.5147       37.2775           91       178     2012      12        14        349              0.086583      -0.247467       4.484501       0.174250   -9999.000000       0.165400       0.028000       0.278000
53797     53797     hebei          114.5147       37.2775           91       178     2012      12        15        350              0.000000      -0.171570       0.677264       0.194331   -9999.000000       0.009800       0.079500       0.415000
53797     53797     hebei          114.5147       37.2775           91       178     2012      12        16        351              0.115833       0.674896       0.570031       0.210288   -9999.000000   -9999.000000   -9999.000000       0.633000
53797     53797     hebei          114.5147       37.2775           91       178     2012      12        17        352              0.118292       0.511200       0.000000       0.214500   -9999.000000   -9999.000000       0.064200   -9999.000000
53797     53797     hebei          114.5147       37.2775           91       178     2012      12        18        353              0.109708       0.177734       0.000000       0.207392   -9999.000000   -9999.000000   -9999.000000       0.392000
53797     53797     hebei          114.5147       37.2775           91       178     2012      12        19        354              0.102667       0.000519       0.000000       0.195476   -9999.000000       0.098500       0.042400       0.347000
53797     53797     hebei          114.5147       37.2775           91       178     2012      12        20        355              0.000000      -0.792450       3.123586       0.173860   -9999.000000       0.032600       0.048000       0.343000
53797     53797     hebei          114.5147       37.2775           91       178     2012      12        21        356              0.098136      -0.643311       0.000000       0.168798   -9999.000000   -9999.000000       0.059100       0.078000
53797     53797     hebei          114.5147       37.2775           91       178     2012      12        22        357              0.072174      -1.679993       0.000000       0.170298   -9999.000000   -9999.000000       0.041900   -9999.000000
53797     53797     hebei          114.5147       37.2775           91       178     2012      12        23        358              0.044875      -2.311829       0.000000       0.164787   -9999.000000   -9999.000000   -9999.000000       0.285000
53797     53797     hebei          114.5147       37.2775           91       178     2012      12        24        359              0.038333      -4.962036       0.000000       0.137835   -9999.000000       0.114400   -9999.000000       0.168000
53797     53797     hebei          114.5147       37.2775           91       178     2012      12        25        360              0.036625      -4.547058       0.000000       0.139552   -9999.000000       0.077400       0.010000       0.189000
53797     53797     hebei          114.5147       37.2775           91       178     2012      12        26        361              0.000000      -4.888763       0.000000       0.139538   -9999.000000   -9999.000000       0.062700       0.036000
53797     53797     hebei          114.5147       37.2775           91       178     2012      12        27        362              0.036100      -5.062408       0.000000       0.133092   -9999.000000   -9999.000000       0.038200   -9999.000000
53797     53797     hebei          114.5147       37.2775           91       178     2012      12        28        363              0.039000      -3.680878       0.338838       0.140807   -9999.000000       0.088400       0.058500       0.069000
53797     53797     hebei          114.5147       37.2775           91       178     2012      12        29        364              0.000000      -3.544281       0.000000       0.140811   -9999.000000       0.111800   -9999.000000   -9999.000000
53797     53797     hebei          114.5147       37.2775           91       178     2012      12        30        365              0.000000      -2.904236       0.000000       0.151941   -9999.000000       0.172100       0.062400       0.189000
53797     53797     hebei          114.5147       37.2775           91       178     2012      12        31        366              0.039200      -1.742584       0.000000       0.173567   -9999.000000   -9999.000000       0.025200   -9999.000000
