# Supplementary material for: Research on Fusing Multisatellite Soil Moisture Data Based on Bayesian Model Averaging
Source: Hindawi journal article supplement (doi:10.1155/2018/9310838), 2018-06-25
Supplement: f1 [file 9310838.f1.zip › 2012_sm00-10cm_daily_ZDB_ZHY_53853_366days_allin.txt]

53853     53853     shanxi         110.9500       36.7000           93       164     2012      01        01        001              0.000000   -9999.000000       0.000000   -9999.000000       0.073000   -9999.000000       0.035100   -9999.000000
53853     53853     shanxi         110.9500       36.7000           93       164     2012      01        02        002              0.108417      -4.243835       0.000000       0.153182   -9999.000000   -9999.000000       0.034800       0.031000
53853     53853     shanxi         110.9500       36.7000           93       164     2012      01        03        003              0.000000      -6.164612       0.000000       0.139063   -9999.000000   -9999.000000   -9999.000000   -9999.000000
53853     53853     shanxi         110.9500       36.7000           93       164     2012      01        04        004              0.103417      -8.805054       0.000000       0.130772   -9999.000000   -9999.000000       0.031300   -9999.000000
53853     53853     shanxi         110.9500       36.7000           93       164     2012      01        05        005              0.104042      -8.286774       0.000000       0.130930   -9999.000000   -9999.000000       0.038500       0.011000
53853     53853     shanxi         110.9500       36.7000           93       164     2012      01        06        006              0.107833      -5.632996       0.000000       0.146856       0.074000   -9999.000000       0.031900   -9999.000000
53853     53853     shanxi         110.9500       36.7000           93       164     2012      01        07        007              0.110875      -3.000153       0.000000       0.167252   -9999.000000   -9999.000000       0.037700       0.033000
53853     53853     shanxi         110.9500       36.7000           93       164     2012      01        08        008              0.000000      -3.201599       0.000000       0.156813       0.074000   -9999.000000   -9999.000000   -9999.000000
53853     53853     shanxi         110.9500       36.7000           93       164     2012      01        09        009              0.108875      -3.812744       0.000000       0.158098   -9999.000000       0.364600   -9999.000000       0.058000
53853     53853     shanxi         110.9500       36.7000           93       164     2012      01        10        010              0.105875      -4.148926       0.000000       0.158861   -9999.000000   -9999.000000       0.030000   -9999.000000
53853     53853     shanxi         110.9500       36.7000           93       164     2012      01        11        011              0.105667      -5.238983       0.000000       0.149863       0.067000   -9999.000000       0.032500       0.016000
53853     53853     shanxi         110.9500       36.7000           93       164     2012      01        12        012              0.105583      -5.124634       0.000000       0.152197       0.066000       0.081900       0.030000       0.007000
53853     53853     shanxi         110.9500       36.7000           93       164     2012      01        13        013              0.106583      -4.300201       0.000000       0.161685       0.070000   -9999.000000       0.032800   -9999.000000
53853     53853     shanxi         110.9500       36.7000           93       164     2012      01        14        014              0.105958      -3.935791       0.000000       0.157737   -9999.000000   -9999.000000   -9999.000000   -9999.000000
53853     53853     shanxi         110.9500       36.7000           93       164     2012      01        15        015              0.107042      -4.193329       0.000000       0.157503   -9999.000000   -9999.000000       0.031200       0.020000
53853     53853     shanxi         110.9500       36.7000           93       164     2012      01        16        016              0.106417      -2.530945       0.000000       0.176846       0.073000   -9999.000000       0.034300       0.032000
53853     53853     shanxi         110.9500       36.7000           93       164     2012      01        17        017              0.000000      -3.234253       0.000000       0.163687       0.066000   -9999.000000       0.028100       0.057000
53853     53853     shanxi         110.9500       36.7000           93       164     2012      01        18        018              0.109333      -2.247009       0.000000       0.175510       0.068000       0.043900       0.031900   -9999.000000
53853     53853     shanxi         110.9500       36.7000           93       164     2012      01        19        019              0.111375      -1.892670       0.000000       0.182142       0.072000   -9999.000000       0.034500       0.001000
53853     53853     shanxi         110.9500       36.7000           93       164     2012      01        20        020              0.112167      -0.964813       0.000000       0.186627   -9999.000000       0.051200   -9999.000000   -9999.000000
53853     53853     shanxi         110.9500       36.7000           93       164     2012      01        21        021              0.110000      -3.579041       0.000000       0.155575   -9999.000000   -9999.000000       0.025500   -9999.000000
53853     53853     shanxi         110.9500       36.7000           93       164     2012      01        22        022              0.106042      -7.795410       0.000000       0.134624   -9999.000000   -9999.000000       0.026100   -9999.000000
53853     53853     shanxi         110.9500       36.7000           93       164     2012      01        23        023              0.103208     -10.121765       0.000000       0.128759   -9999.000000   -9999.000000       0.024900   -9999.000000
53853     53853     shanxi         110.9500       36.7000           93       164     2012      01        24        024              0.101750     -10.417633       0.000000       0.126333   -9999.000000   -9999.000000   -9999.000000       0.017000
53853     53853     shanxi         110.9500       36.7000           93       164     2012      01        25        025              0.101958     -10.753967       0.000000       0.126072   -9999.000000   -9999.000000   -9999.000000   -9999.000000
53853     53853     shanxi         110.9500       36.7000           93       164     2012      01        26        026              0.103333      -7.836609       0.000000       0.133913   -9999.000000   -9999.000000       0.027100       0.066000
53853     53853     shanxi         110.9500       36.7000           93       164     2012      01        27        027              0.105500      -5.367676       0.000000       0.151865       0.076000       0.116700       0.031600       0.014000
53853     53853     shanxi         110.9500       36.7000           93       164     2012      01        28        028              0.107125      -3.296692       0.000000       0.170151   -9999.000000   -9999.000000       0.027600   -9999.000000
53853     53853     shanxi         110.9500       36.7000           93       164     2012      01        29        029              0.109875      -3.493011       0.000000       0.166247       0.077000   -9999.000000       0.029800       0.012000
53853     53853     shanxi         110.9500       36.7000           93       164     2012      01        30        030              0.110792      -2.926697       0.000000       0.175242   -9999.000000       0.103200       0.035300   -9999.000000
53853     53853     shanxi         110.9500       36.7000           93       164     2012      01        31        031              0.114292      -1.795502       0.000000       0.181192   -9999.000000       0.046200   -9999.000000       0.040000
53853     53853     shanxi         110.9500       36.7000           93       164     2012      02        01        032              0.108667       0.119812       0.000000       0.201276   -9999.000000   -9999.000000       0.028700   -9999.000000
53853     53853     shanxi         110.9500       36.7000           93       164     2012      02        02        033              0.106542      -5.709259       0.000000       0.149186       0.064000   -9999.000000       0.031500       0.007000
53853     53853     shanxi         110.9500       36.7000           93       164     2012      02        03        034              0.109667      -6.010376       0.033691       0.145880       0.072000   -9999.000000       0.029700       0.005000
53853     53853     shanxi         110.9500       36.7000           93       164     2012      02        04        035              0.112542      -2.734344       0.000000       0.172367       0.077000   -9999.000000       0.036600   -9999.000000
53853     53853     shanxi         110.9500       36.7000           93       164     2012      02        05        036              0.113167      -1.157349       0.000000       0.186157   -9999.000000       0.042800       0.035900       0.012000
53853     53853     shanxi         110.9500       36.7000           93       164     2012      02        06        037              0.108167      -0.742523       0.000000       0.190725   -9999.000000   -9999.000000       0.034100   -9999.000000
53853     53853     shanxi         110.9500       36.7000           93       164     2012      02        07        038              0.104542      -6.291077       0.000000       0.146363       0.064000   -9999.000000       0.030100   -9999.000000
53853     53853     shanxi         110.9500       36.7000           93       164     2012      02        08        039              0.102125      -7.813080       0.000000       0.130534   -9999.000000   -9999.000000       0.038600   -9999.000000
53853     53853     shanxi         110.9500       36.7000           93       164     2012      02        09        040              0.103542      -8.935120       0.000000       0.129146   -9999.000000   -9999.000000       0.032100       0.019000
53853     53853     shanxi         110.9500       36.7000           93       164     2012      02        10        041              0.106458      -6.854462       0.000000       0.135991   -9999.000000   -9999.000000       0.033000   -9999.000000
53853     53853     shanxi         110.9500       36.7000           93       164     2012      02        11        042              0.110348      -5.025696       0.000000       0.159020   -9999.000000   -9999.000000   -9999.000000   -9999.000000
53853     53853     shanxi         110.9500       36.7000           93       164     2012      02        12        043              0.111417      -0.831665       0.000000       0.185857   -9999.000000   -9999.000000   -9999.000000       0.037000
53853     53853     shanxi         110.9500       36.7000           93       164     2012      02        13        044              0.111083      -1.031952       0.288965       0.187209   -9999.000000       0.055100   -9999.000000       0.023000
53853     53853     shanxi         110.9500       36.7000           93       164     2012      02        14        045              0.111083      -0.882996       0.000000       0.191400       0.068000   -9999.000000       0.036400       0.155000
53853     53853     shanxi         110.9500       36.7000           93       164     2012      02        15        046              0.112417      -0.308380       0.115676       0.194976   -9999.000000   -9999.000000       0.037400       0.005000
53853     53853     shanxi         110.9500       36.7000           93       164     2012      02        16        047              0.109292      -0.965393       0.000000       0.193474   -9999.000000   -9999.000000       0.039100   -9999.000000
53853     53853     shanxi         110.9500       36.7000           93       164     2012      02        17        048              0.106542      -3.878967       0.000000       0.167755       0.064000       0.151400   -9999.000000       0.016000
53853     53853     shanxi         110.9500       36.7000           93       164     2012      02        18        049              0.106542      -5.241608       0.000000       0.152615       0.062000   -9999.000000       0.036500       0.060000
53853     53853     shanxi         110.9500       36.7000           93       164     2012      02        19        050              0.110167      -5.118683       0.180616       0.160660       0.070000   -9999.000000       0.043700       0.113000
53853     53853     shanxi         110.9500       36.7000           93       164     2012      02        20        051              0.115875      -0.718658       0.000000       0.188895       0.078000   -9999.000000       0.038700       0.023000
53853     53853     shanxi         110.9500       36.7000           93       164     2012      02        21        052              0.124583       1.686523       0.000000       0.209863   -9999.000000   -9999.000000   -9999.000000   -9999.000000
53853     53853     shanxi         110.9500       36.7000           93       164     2012      02        22        053              0.132458       3.392670       0.000000       0.227930       0.065000   -9999.000000   -9999.000000       0.165000
53853     53853     shanxi         110.9500       36.7000           93       164     2012      02        23        054              0.140250       3.344208       1.025242       0.232099       0.059000       0.028800       0.043800       0.145000
53853     53853     shanxi         110.9500       36.7000           93       164     2012      02        24        055              0.143542       2.350494       0.000000       0.226078       0.076000   -9999.000000       0.038900       0.372000
53853     53853     shanxi         110.9500       36.7000           93       164     2012      02        25        056              0.134250       0.957947       0.555581       0.212536   -9999.000000       0.040900       0.037100       0.013000
53853     53853     shanxi         110.9500       36.7000           93       164     2012      02        26        057              0.137083      -0.792450       0.000000       0.189975   -9999.000000       0.042000       0.037900   -9999.000000
53853     53853     shanxi         110.9500       36.7000           93       164     2012      02        27        058              0.138500       0.194397       0.000000       0.198869   -9999.000000   -9999.000000   -9999.000000       0.028000
53853     53853     shanxi         110.9500       36.7000           93       164     2012      02        28        059              0.138833       1.902802       0.000000       0.211689       0.067000       0.131000   -9999.000000   -9999.000000
53853     53853     shanxi         110.9500       36.7000           93       164     2012      02        29        060              0.000000   -9999.000000       0.000000   -9999.000000       0.073000   -9999.000000   -9999.000000   -9999.000000
53853     53853     shanxi         110.9500       36.7000           93       164     2012      03        01        061              0.160042       2.586975       0.000000       0.222691       0.083000   -9999.000000       0.040600   -9999.000000
53853     53853     shanxi         110.9500       36.7000           93       164     2012      03        02        062              0.174417       1.962646       0.000000       0.229354   -9999.000000       0.020900       0.041100       0.280000
53853     53853     shanxi         110.9500       36.7000           93       164     2012      03        03        063              0.188583       1.750702       0.000000       0.228054   -9999.000000   -9999.000000       0.039000       0.134000
53853     53853     shanxi         110.9500       36.7000           93       164     2012      03        04        064              0.206542       1.804993       0.000000       0.223498       0.080000       0.142600       0.046300   -9999.000000
53853     53853     shanxi         110.9500       36.7000           93       164     2012      03        05        065              0.208042       3.089020       0.096577       0.232642       0.082000   -9999.000000   -9999.000000       0.185000
53853     53853     shanxi         110.9500       36.7000           93       164     2012      03        06        066              0.182208       0.994110       0.063712       0.209731       0.080000   -9999.000000       0.037900   -9999.000000
53853     53853     shanxi         110.9500       36.7000           93       164     2012      03        07        067              0.000000       0.064575       0.000000       0.196450   -9999.000000       0.046100       0.045100       0.214000
53853     53853     shanxi         110.9500       36.7000           93       164     2012      03        08        068              0.209542       3.319763       0.000000       0.223798   -9999.000000   -9999.000000       0.043100       0.228000
53853     53853     shanxi         110.9500       36.7000           93       164     2012      03        09        069              0.214333       3.166504       0.000000       0.234140       0.077000       0.095500       0.052500       0.394000
53853     53853     shanxi         110.9500       36.7000           93       164     2012      03        10        070              0.212167       3.137360       0.000000       0.227464       0.069000   -9999.000000   -9999.000000       0.122000
53853     53853     shanxi         110.9500       36.7000           93       164     2012      03        11        071              0.214292       3.519379       0.000000       0.219521       0.069000   -9999.000000       0.045300   -9999.000000
53853     53853     shanxi         110.9500       36.7000           93       164     2012      03        12        072              0.217500       3.957153       0.000000       0.225419       0.075000       0.150600       0.036700       0.281000
53853     53853     shanxi         110.9500       36.7000           93       164     2012      03        13        073              0.215667       4.454071       0.000000       0.224040   -9999.000000   -9999.000000       0.045700       0.231000
53853     53853     shanxi         110.9500       36.7000           93       164     2012      03        14        074              0.218739       6.299133       0.000000       0.232968       0.070000       0.091500   -9999.000000       0.444000
53853     53853     shanxi         110.9500       36.7000           93       164     2012      03        15        075              0.227542       8.590363       0.000000       0.246032       0.084500       0.090900       0.051500       0.488000
53853     53853     shanxi         110.9500       36.7000           93       164     2012      03        16        076              0.229333       4.203247       0.000000       0.247889       0.071000       0.181800   -9999.000000   -9999.000000
53853     53853     shanxi         110.9500       36.7000           93       164     2012      03        17        077              0.226583       7.610840       0.000000       0.242116       0.069000       0.096000       0.040600       0.387000
53853     53853     shanxi         110.9500       36.7000           93       164     2012      03        18        078              0.226000      10.065918       0.036023       0.243904       0.082000   -9999.000000       0.048600       0.301000
53853     53853     shanxi         110.9500       36.7000           93       164     2012      03        19        079              0.226833       8.669739       0.000000       0.242194       0.080000   -9999.000000       0.051800       0.408000
53853     53853     shanxi         110.9500       36.7000           93       164     2012      03        20        080              0.225583       6.035980       0.000000       0.244907       0.071500       0.098100       0.045100       0.254000
53853     53853     shanxi         110.9500       36.7000           93       164     2012      03        21        081              0.233458       7.971283       0.883947       0.244368   -9999.000000   -9999.000000       0.063100   -9999.000000
53853     53853     shanxi         110.9500       36.7000           93       164     2012      03        22        082              0.242000       3.725922       0.000000       0.243660       0.098000   -9999.000000   -9999.000000       0.634000
53853     53853     shanxi         110.9500       36.7000           93       164     2012      03        23        083              0.232333       3.412231       0.000000       0.240751   -9999.000000   -9999.000000       0.043000       0.278000
53853     53853     shanxi         110.9500       36.7000           93       164     2012      03        24        084              0.225500       4.502899       0.000000       0.223795   -9999.000000       0.125100   -9999.000000       0.237000
53853     53853     shanxi         110.9500       36.7000           93       164     2012      03        25        085              0.000000       7.220947       0.000000       0.226251       0.068000       0.095200       0.045800       0.281000
53853     53853     shanxi         110.9500       36.7000           93       164     2012      03        26        086              0.223958       9.367249       0.000000       0.230994       0.072000   -9999.000000       0.057400   -9999.000000
53853     53853     shanxi         110.9500       36.7000           93       164     2012      03        27        087              0.223250      10.926056       0.000000       0.226100       0.065000   -9999.000000   -9999.000000       0.301000
53853     53853     shanxi         110.9500       36.7000           93       164     2012      03        28        088              0.225583      11.859650       0.043971       0.220238   -9999.000000   -9999.000000       0.063400   -9999.000000
53853     53853     shanxi         110.9500       36.7000           93       164     2012      03        29        089              0.230208      12.041016       0.000000       0.221456       0.076000   -9999.000000       0.047800       0.223000
53853     53853     shanxi         110.9500       36.7000           93       164     2012      03        30        090              0.223792      12.220245       0.000000       0.219337       0.059000       0.265900       0.049700   -9999.000000
53853     53853     shanxi         110.9500       36.7000           93       164     2012      03        31        091              0.222000       7.085083       0.000000       0.214687       0.063000   -9999.000000       0.043800       0.306000
53853     53853     shanxi         110.9500       36.7000           93       164     2012      04        01        092              0.221625      11.311890       0.000000       0.212439       0.063000       0.148300       0.050500       0.256000
53853     53853     shanxi         110.9500       36.7000           93       164     2012      04        02        093              0.219083      13.785370       0.000000       0.207910       0.070000       0.294400   -9999.000000   -9999.000000
53853     53853     shanxi         110.9500       36.7000           93       164     2012      04        03        094              0.217917       8.007416       0.033701       0.208372   -9999.000000   -9999.000000       0.046200       0.174000
53853     53853     shanxi         110.9500       36.7000           93       164     2012      04        04        095              0.217250      10.621796       0.000000       0.205947       0.069000       0.032600       0.054700   -9999.000000
53853     53853     shanxi         110.9500       36.7000           93       164     2012      04        05        096              0.215625      13.464447       0.025056       0.201108       0.060000   -9999.000000       0.041800       0.200000
53853     53853     shanxi         110.9500       36.7000           93       164     2012      04        06        097              0.214208      12.935669       0.000000       0.197043       0.058000   -9999.000000       0.048900       0.162000
53853     53853     shanxi         110.9500       36.7000           93       164     2012      04        07        098              0.213333      13.122955       0.000000       0.193884       0.065000       0.049700       0.050200       0.361000
53853     53853     shanxi         110.9500       36.7000           93       164     2012      04        08        099              0.212708      15.353607       0.000000       0.189526       0.070000   -9999.000000   -9999.000000       0.165000
53853     53853     shanxi         110.9500       36.7000           93       164     2012      04        09        100              0.210917      17.355865       0.077039       0.184886       0.075000       0.063400       0.044500   -9999.000000
53853     53853     shanxi         110.9500       36.7000           93       164     2012      04        10        101              0.210125      16.804565       0.519615       0.184836       0.065500   -9999.000000       0.055900       0.315000
53853     53853     shanxi         110.9500       36.7000           93       164     2012      04        11        102              0.211125      16.238861       3.710353       0.192036       0.071000       0.165900       0.043000       0.183000
53853     53853     shanxi         110.9500       36.7000           93       164     2012      04        12        103              0.216208      12.889709       0.000000       0.214365       0.078000   -9999.000000       0.055900       0.689000
53853     53853     shanxi         110.9500       36.7000           93       164     2012      04        13        104              0.214500      10.463928       0.000000       0.235296       0.078000   -9999.000000   -9999.000000       0.263000
53853     53853     shanxi         110.9500       36.7000           93       164     2012      04        14        105              0.211833      14.357544       0.000000       0.217893       0.074000       0.088400       0.046800   -9999.000000
53853     53853     shanxi         110.9500       36.7000           93       164     2012      04        15        106              0.210625      15.356110       0.000000       0.207232       0.064500   -9999.000000       0.043900       0.197000
53853     53853     shanxi         110.9500       36.7000           93       164     2012      04        16        107              0.208292      17.149475       0.000000       0.197175       0.061000       0.067500       0.053700       0.128000
53853     53853     shanxi         110.9500       36.7000           93       164     2012      04        17        108              0.206292      17.237274       0.598847       0.188103       0.060000       0.132700       0.047600       0.299000
53853     53853     shanxi         110.9500       36.7000           93       164     2012      04        18        109              0.205833      16.386841       1.331687       0.186722       0.073000   -9999.000000   -9999.000000       0.127000
53853     53853     shanxi         110.9500       36.7000           93       164     2012      04        19        110              0.204250      18.289368      12.298033       0.196593       0.071000       0.053200   -9999.000000   -9999.000000
53853     53853     shanxi         110.9500       36.7000           93       164     2012      04        20        111              0.203000      16.704559       0.443661       0.197459       0.074000       0.080000       0.051900       0.421000
53853     53853     shanxi         110.9500       36.7000           93       164     2012      04        21        112              0.203000      16.596893       0.000000       0.195680       0.060000   -9999.000000       0.054400       0.224000
53853     53853     shanxi         110.9500       36.7000           93       164     2012      04        22        113              0.202042      18.944000       0.185882       0.187358       0.063000       0.014900   -9999.000000       0.095000
53853     53853     shanxi         110.9500       36.7000           93       164     2012      04        23        114              0.215667      23.059387       8.007325       0.180382       0.060000   -9999.000000       0.050200       0.073000
53853     53853     shanxi         110.9500       36.7000           93       164     2012      04        24        115              0.257042      23.524658       1.474121       0.208568   -9999.000000       0.098700       0.084500   -9999.000000
53853     53853     shanxi         110.9500       36.7000           93       164     2012      04        25        116              0.000000      13.527313       0.000000       0.260434       0.084000       0.268700   -9999.000000       0.473000
53853     53853     shanxi         110.9500       36.7000           93       164     2012      04        26        117              0.231250      13.449341       0.000000       0.233540       0.064000   -9999.000000       0.054100   -9999.000000
53853     53853     shanxi         110.9500       36.7000           93       164     2012      04        27        118              0.226125      17.343140       0.000000       0.218340       0.059000       0.154700   -9999.000000       0.126000
53853     53853     shanxi         110.9500       36.7000           93       164     2012      04        28        119              0.221875      19.630524       3.252246       0.203502       0.062000   -9999.000000       0.037500   -9999.000000
53853     53853     shanxi         110.9500       36.7000           93       164     2012      04        29        120              0.218500      21.555115       0.000000       0.221855       0.073000       0.352500       0.053400       0.234000
53853     53853     shanxi         110.9500       36.7000           93       164     2012      04        30        121              0.214875      23.023438       0.107227       0.210592       0.069000       0.117100   -9999.000000       0.139000
53853     53853     shanxi         110.9500       36.7000           93       164     2012      05        01        122              0.212208      21.487518       0.459501       0.200160       0.081000   -9999.000000       0.056900   -9999.000000
53853     53853     shanxi         110.9500       36.7000           93       164     2012      05        02        123              0.211208      19.189697       0.073469       0.205257       0.076500   -9999.000000       0.054400       0.171000
53853     53853     shanxi         110.9500       36.7000           93       164     2012      05        03        124              0.208042      21.737762       1.067571       0.197219       0.074000   -9999.000000       0.062100   -9999.000000
53853     53853     shanxi         110.9500       36.7000           93       164     2012      05        04        125              0.205750      22.853973       0.000000       0.186082       0.079000       0.152700       0.048200       0.204000
53853     53853     shanxi         110.9500       36.7000           93       164     2012      05        05        126              0.202875      23.625458       0.000000       0.177843       0.071000   -9999.000000       0.052700       0.086000
53853     53853     shanxi         110.9500       36.7000           93       164     2012      05        06        127              0.201208      25.104858       0.484746       0.172526       0.072500   -9999.000000   -9999.000000       0.288000
53853     53853     shanxi         110.9500       36.7000           93       164     2012      05        07        128              0.199208      25.923431       0.167086       0.172637   -9999.000000       0.059400       0.056600       0.181000
53853     53853     shanxi         110.9500       36.7000           93       164     2012      05        08        129              0.200875      22.850769       2.950238       0.178636       0.067000       0.058100       0.061800   -9999.000000
53853     53853     shanxi         110.9500       36.7000           93       164     2012      05        09        130              0.202542      24.725098       0.000000       0.198859       0.065000   -9999.000000       0.053600       0.340000
53853     53853     shanxi         110.9500       36.7000           93       164     2012      05        10        131              0.202045      24.145325       1.669127       0.191403       0.077000   -9999.000000       0.055500       0.093000
53853     53853     shanxi         110.9500       36.7000           93       164     2012      05        11        132              0.205833      25.911682       1.325357       0.181271       0.099500   -9999.000000       0.072700       0.688000
53853     53853     shanxi         110.9500       36.7000           93       164     2012      05        12        133              0.204708      17.961060       0.000000       0.221431       0.081000       0.074300       0.060900       0.095000
53853     53853     shanxi         110.9500       36.7000           93       164     2012      05        13        134              0.200625      16.687195       0.081934       0.201659       0.076000       0.142400       0.053000   -9999.000000
53853     53853     shanxi         110.9500       36.7000           93       164     2012      05        14        135              0.199125      16.214050       0.401495       0.192168       0.074000   -9999.000000       0.070600       0.126000
53853     53853     shanxi         110.9500       36.7000           93       164     2012      05        15        136              0.196125      18.543793       0.000000       0.182004       0.079000       0.039800       0.054700       0.004000
53853     53853     shanxi         110.9500       36.7000           93       164     2012      05        16        137              0.192750      19.767426       0.000000       0.174055       0.080000   -9999.000000       0.064400       0.135000
53853     53853     shanxi         110.9500       36.7000           93       164     2012      05        17        138              0.190667      20.237762       0.000000       0.170184       0.075000       0.079700   -9999.000000       0.084000
53853     53853     shanxi         110.9500       36.7000           93       164     2012      05        18        139              0.188625      23.707764       0.038652       0.167109       0.085000       0.089700       0.060900   -9999.000000
53853     53853     shanxi         110.9500       36.7000           93       164     2012      05        19        140              0.186750      26.084930       0.156290       0.166146       0.081000   -9999.000000       0.060200       0.058000
53853     53853     shanxi         110.9500       36.7000           93       164     2012      05        20        141              0.182000      27.978088       1.799459       0.165259   -9999.000000   -9999.000000       0.076700       0.031000
53853     53853     shanxi         110.9500       36.7000           93       164     2012      05        21        142              0.179917      26.373138       3.295578       0.169666       0.150000   -9999.000000       0.091500       0.675000
53853     53853     shanxi         110.9500       36.7000           93       164     2012      05        22        143              0.195375      17.457245       0.000000       0.225227       0.097500       0.207400       0.076500       0.123000
53853     53853     shanxi         110.9500       36.7000           93       164     2012      05        23        144              0.192292      19.022736       0.046518       0.215129   -9999.000000       0.060400   -9999.000000   -9999.000000
53853     53853     shanxi         110.9500       36.7000           93       164     2012      05        24        145              0.187583      20.443420       0.034131       0.196876       0.098000   -9999.000000       0.071900       0.052000
53853     53853     shanxi         110.9500       36.7000           93       164     2012      05        25        146              0.000000      19.466858       0.048376       0.188083       0.104000       0.036400       0.076300   -9999.000000
53853     53853     shanxi         110.9500       36.7000           93       164     2012      05        26        147              0.182292      22.309021       0.000000       0.177747       0.099000   -9999.000000       0.065600       0.057000
53853     53853     shanxi         110.9500       36.7000           93       164     2012      05        27        148              0.179125      24.135529       0.000000       0.170744       0.085000   -9999.000000       0.072700   -9999.000000
53853     53853     shanxi         110.9500       36.7000           93       164     2012      05        28        149              0.196000      25.812988      30.357616       0.166663       0.079000       0.046400       0.070600       0.060000
53853     53853     shanxi         110.9500       36.7000           93       164     2012      05        29        150              0.257500      24.605530       0.107392       0.236027       0.103000   -9999.000000       0.096100       0.637000
53853     53853     shanxi         110.9500       36.7000           93       164     2012      05        30        151              0.236458      20.178925       0.000000       0.297667       0.094000       0.115800       0.075600   -9999.000000
53853     53853     shanxi         110.9500       36.7000           93       164     2012      05        31        152              0.223208      22.125916       0.368336       0.265938       0.107000       0.028700       0.072700   -9999.000000
53853     53853     shanxi         110.9500       36.7000           93       164     2012      06        01        153              0.216000      21.897430       1.127195       0.253042       0.091000   -9999.000000       0.067900   -9999.000000
53853     53853     shanxi         110.9500       36.7000           93       164     2012      06        02        154              0.207333      22.647797       0.770936       0.238902       0.086500       0.063300       0.077200       0.184000
53853     53853     shanxi         110.9500       36.7000           93       164     2012      06        03        155              0.201000      22.807129       0.000000       0.234901       0.087000   -9999.000000   -9999.000000       0.067000
53853     53853     shanxi         110.9500       36.7000           93       164     2012      06        04        156              0.193625      23.325073       0.566258       0.223190       0.076000       0.083700       0.088400       0.275000
53853     53853     shanxi         110.9500       36.7000           93       164     2012      06        05        157              0.186667      24.817535       3.187886       0.212292   -9999.000000       0.048900       0.097000       0.126000
53853     53853     shanxi         110.9500       36.7000           93       164     2012      06        06        158              0.178667      23.977844       0.718538       0.221441       0.086000   -9999.000000       0.097300   -9999.000000
53853     53853     shanxi         110.9500       36.7000           93       164     2012      06        07        159              0.180208      18.465942       3.455385       0.246166       0.108000       0.098200       0.082300       0.202000
53853     53853     shanxi         110.9500       36.7000           93       164     2012      06        08        160              0.185250      21.833649       0.000000       0.249990       0.091000   -9999.000000       0.090800       0.111000
53853     53853     shanxi         110.9500       36.7000           93       164     2012      06        09        161              0.178250      21.567413       0.000000       0.238300       0.077000       0.118600   -9999.000000       0.280000
53853     53853     shanxi         110.9500       36.7000           93       164     2012      06        10        162              0.163042      25.418488       0.000000       0.214705       0.087000       0.032100       0.083500       0.134000
53853     53853     shanxi         110.9500       36.7000           93       164     2012      06        11        163              0.000000      22.334290       0.000000       0.198325       0.090000   -9999.000000       0.098500   -9999.000000
53853     53853     shanxi         110.9500       36.7000           93       164     2012      06        12        164              0.136125      24.067383       0.000000       0.186137       0.084000       0.077000       0.088000       0.208000
53853     53853     shanxi         110.9500       36.7000           93       164     2012      06        13        165              0.129417      25.913025       0.358844       0.177766       0.088000   -9999.000000       0.093200       0.087000
53853     53853     shanxi         110.9500       36.7000           93       164     2012      06        14        166              0.128292      26.530762       3.032981       0.176320       0.085000   -9999.000000   -9999.000000       0.164000
53853     53853     shanxi         110.9500       36.7000           93       164     2012      06        15        167              0.125833      23.834930       0.000000       0.174371   -9999.000000       0.061800       0.105700       0.098000
53853     53853     shanxi         110.9500       36.7000           93       164     2012      06        16        168              0.122917      24.337280       0.000000       0.171934       0.087000   -9999.000000       0.093100   -9999.000000
53853     53853     shanxi         110.9500       36.7000           93       164     2012      06        17        169              0.120083      26.851379       0.000000       0.169067       0.085000       0.032100       0.099400       0.086000
53853     53853     shanxi         110.9500       36.7000           93       164     2012      06        18        170              0.117125      28.300201       0.000000       0.167472       0.081500       0.051800       0.079900       0.138000
53853     53853     shanxi         110.9500       36.7000           93       164     2012      06        19        171              0.114417      29.148010       2.210011       0.166433   -9999.000000   -9999.000000       0.097000       0.490000
53853     53853     shanxi         110.9500       36.7000           93       164     2012      06        20        172              0.114708      24.724396       2.101163       0.192183   -9999.000000       0.171200   -9999.000000       0.505000
53853     53853     shanxi         110.9500       36.7000           93       164     2012      06        21        173              0.117458      24.556183       0.121766       0.208654       0.103000   -9999.000000       0.090700   -9999.000000
53853     53853     shanxi         110.9500       36.7000           93       164     2012      06        22        174              0.119542      26.113068       0.400602       0.191824       0.107000       0.121500       0.104300       0.179000
53853     53853     shanxi         110.9500       36.7000           93       164     2012      06        23        175              0.119000      29.460297      24.107229       0.177603       0.089000       0.143200       0.089800   -9999.000000
53853     53853     shanxi         110.9500       36.7000           93       164     2012      06        24        176              0.181167      28.963989       1.527766       0.222524       0.138000   -9999.000000       0.109000       0.601000
53853     53853     shanxi         110.9500       36.7000           93       164     2012      06        25        177              0.173125      24.635773       0.345179       0.299785       0.140000       0.201100       0.113300   -9999.000000
53853     53853     shanxi         110.9500       36.7000           93       164     2012      06        26        178              0.164500      24.076324       0.000000       0.269629       0.114000   -9999.000000   -9999.000000       0.604000
53853     53853     shanxi         110.9500       36.7000           93       164     2012      06        27        179              0.157292      23.317444       2.122229       0.257360       0.121000   -9999.000000       0.100300       0.318000
53853     53853     shanxi         110.9500       36.7000           93       164     2012      06        28        180              0.157125      22.151001      24.935177       0.255798       0.142000       0.149500       0.126300   -9999.000000
53853     53853     shanxi         110.9500       36.7000           93       164     2012      06        29        181              0.235083      21.002991       3.808201       0.314057       0.151000   -9999.000000       0.114500       0.961000
53853     53853     shanxi         110.9500       36.7000           93       164     2012      06        30        182              0.216000      22.603180       0.000000       0.319943       0.114000       0.152300       0.108000   -9999.000000
53853     53853     shanxi         110.9500       36.7000           93       164     2012      07        01        183              0.202167      24.270691       0.000000       0.289919       0.114000       0.422000   -9999.000000       0.568000
53853     53853     shanxi         110.9500       36.7000           93       164     2012      07        02        184              0.190625      26.098785       0.497246       0.273590       0.114000   -9999.000000       0.113700       0.268000
53853     53853     shanxi         110.9500       36.7000           93       164     2012      07        03        185              0.182500      26.253510       3.702119       0.261541       0.096500       0.343500       0.105900       0.403000
53853     53853     shanxi         110.9500       36.7000           93       164     2012      07        04        186              0.181583      25.993042       0.103782       0.271579       0.099500   -9999.000000       0.110400       0.389000
53853     53853     shanxi         110.9500       36.7000           93       164     2012      07        05        187              0.179261      24.098877       1.331056       0.264600       0.090000       0.146600       0.094400   -9999.000000
53853     53853     shanxi         110.9500       36.7000           93       164     2012      07        06        188              0.171375      26.686737       0.300739       0.248583   -9999.000000       0.218300       0.104400       0.296000
53853     53853     shanxi         110.9500       36.7000           93       164     2012      07        07        189              0.164667      26.431000       0.272849       0.239028   -9999.000000   -9999.000000   -9999.000000       0.338000
53853     53853     shanxi         110.9500       36.7000           93       164     2012      07        08        190              0.256261      25.134949      31.695791       0.239942       0.149000       0.153400       0.123600       0.885000
53853     53853     shanxi         110.9500       36.7000           93       164     2012      07        09        191              0.266917      22.155243       2.854014       0.336074       0.138000   -9999.000000       0.143100       0.956000
53853     53853     shanxi         110.9500       36.7000           93       164     2012      07        10        192              0.248042      22.978241       1.668121       0.318757       0.113000   -9999.000000       0.126400   -9999.000000
53853     53853     shanxi         110.9500       36.7000           93       164     2012      07        11        193              0.236542      27.162628       0.000000       0.294589   -9999.000000       0.163000       0.133100       0.631000
53853     53853     shanxi         110.9500       36.7000           93       164     2012      07        12        194              0.229958      26.480560       0.000000       0.281213       0.117000   -9999.000000       0.118600       0.305000
53853     53853     shanxi         110.9500       36.7000           93       164     2012      07        13        195              0.258125      26.737610       6.569284       0.266898   -9999.000000       0.244100   -9999.000000       0.469000
53853     53853     shanxi         110.9500       36.7000           93       164     2012      07        14        196              0.255417      25.813751      16.922356       0.286916       0.105000   -9999.000000       0.129000       0.619000
53853     53853     shanxi         110.9500       36.7000           93       164     2012      07        15        197              0.248042      25.592590       1.607643       0.299852       0.119500       0.179500       0.135800   -9999.000000
53853     53853     shanxi         110.9500       36.7000           93       164     2012      07        16        198              0.235417      24.447113       0.000000       0.315116       0.112000       0.119100       0.133200       0.431000
53853     53853     shanxi         110.9500       36.7000           93       164     2012      07        17        199              0.226542      24.595856       0.000000       0.291308       0.122000   -9999.000000       0.141100       0.345000
53853     53853     shanxi         110.9500       36.7000           93       164     2012      07        18        200              0.220125      24.202271       0.000000       0.280176       0.115000       0.142300   -9999.000000       0.291000
53853     53853     shanxi         110.9500       36.7000           93       164     2012      07        19        201              0.215208      24.451477       0.000000       0.271272       0.100500   -9999.000000       0.127100       0.269000
53853     53853     shanxi         110.9500       36.7000           93       164     2012      07        20        202              0.210522      26.022156       0.891206       0.261088       0.098000       0.045500       0.138000   -9999.000000
53853     53853     shanxi         110.9500       36.7000           93       164     2012      07        21        203              0.252043      26.363739      28.448486       0.262813   -9999.000000       0.284000       0.161900       0.921000
53853     53853     shanxi         110.9500       36.7000           93       164     2012      07        22        204              0.250583      22.758087       0.000000       0.335440       0.123000   -9999.000000       0.144500   -9999.000000
53853     53853     shanxi         110.9500       36.7000           93       164     2012      07        23        205              0.237750      23.880280       0.497712       0.307013       0.138000   -9999.000000       0.132300       0.641000
53853     53853     shanxi         110.9500       36.7000           93       164     2012      07        24        206              0.259833      24.003448       8.004959       0.298088       0.161000       0.284000   -9999.000000   -9999.000000
53853     53853     shanxi         110.9500       36.7000           93       164     2012      07        25        207              0.248458      23.556946       0.190739       0.318962       0.134000       0.137400       0.125000       0.904000
53853     53853     shanxi         110.9500       36.7000           93       164     2012      07        26        208              0.266708      26.205597       8.410316       0.298361   -9999.000000       0.175800       0.146400       0.900000
53853     53853     shanxi         110.9500       36.7000           93       164     2012      07        27        209              0.261542      26.846802       1.803909       0.312567       0.127000   -9999.000000       0.120100   -9999.000000
53853     53853     shanxi         110.9500       36.7000           93       164     2012      07        28        210              0.247125      27.034882       1.447781       0.300305       0.133000       0.190500       0.127200       0.627000
53853     53853     shanxi         110.9500       36.7000           93       164     2012      07        29        211              0.236208      27.911591       1.934282       0.296756       0.124000       0.237000       0.112900   -9999.000000
53853     53853     shanxi         110.9500       36.7000           93       164     2012      07        30        212              0.259042      28.564911      45.998272       0.288770   -9999.000000   -9999.000000       0.149400       0.612000
53853     53853     shanxi         110.9500       36.7000           93       164     2012      07        31        213              0.291500      24.601562       3.461312       0.341619       0.182000       0.288500       0.120100       0.917000
53853     53853     shanxi         110.9500       36.7000           93       164     2012      08        01        214              0.272333      22.293518       0.456322       0.344203       0.162000   -9999.000000       0.130000       0.915000
53853     53853     shanxi         110.9500       36.7000           93       164     2012      08        02        215              0.258792      24.290558       0.331763       0.325052       0.133000       0.249000       0.118400       0.791000
53853     53853     shanxi         110.9500       36.7000           93       164     2012      08        03        216              0.248125      26.103058       0.000000       0.312864       0.140000       0.196600       0.129900   -9999.000000
53853     53853     shanxi         110.9500       36.7000           93       164     2012      08        04        217              0.239609      26.106873       0.000000       0.302308       0.121500   -9999.000000   -9999.000000       0.707000
53853     53853     shanxi         110.9500       36.7000           93       164     2012      08        05        218              0.234208      26.653412       0.362665       0.293743       0.127000       0.074800       0.119300       0.479000
53853     53853     shanxi         110.9500       36.7000           93       164     2012      08        06        219              0.228667      25.339294       0.000000       0.291714       0.119000   -9999.000000       0.128600       0.593000
53853     53853     shanxi         110.9500       36.7000           93       164     2012      08        07        220              0.222833      25.904938       0.000000       0.284706       0.110000       0.200800       0.117100       0.437000
53853     53853     shanxi         110.9500       36.7000           93       164     2012      08        08        221              0.218042      27.510986       5.072017       0.277634       0.150000       0.210700       0.117100   -9999.000000
53853     53853     shanxi         110.9500       36.7000           93       164     2012      08        09        222              0.215708      26.565338       0.089551       0.293007       0.136000   -9999.000000       0.125800       0.464000
53853     53853     shanxi         110.9500       36.7000           93       164     2012      08        10        223              0.211833      24.481537       0.000000       0.285387       0.120500       0.158100   -9999.000000       0.348000
53853     53853     shanxi         110.9500       36.7000           93       164     2012      08        11        224              0.210083      25.510529       8.249383       0.271601       0.129000       0.073900       0.141600       0.431000
53853     53853     shanxi         110.9500       36.7000           93       164     2012      08        12        225              0.224000      26.019958       0.509476       0.287389       0.155000   -9999.000000       0.146000       0.725000
53853     53853     shanxi         110.9500       36.7000           93       164     2012      08        13        226              0.225167      23.768188       9.057863       0.297386   -9999.000000       0.185600       0.110400   -9999.000000
53853     53853     shanxi         110.9500       36.7000           93       164     2012      08        14        227              0.285417      22.589203      10.831553       0.299672       0.165000   -9999.000000       0.133700       0.843000
53853     53853     shanxi         110.9500       36.7000           93       164     2012      08        15        228              0.259417      21.495972       0.396131       0.330568       0.147500   -9999.000000   -9999.000000       0.642000
53853     53853     shanxi         110.9500       36.7000           93       164     2012      08        16        229              0.247000      24.083496       1.664779       0.303814       0.134000       0.139600       0.102700       0.413000
53853     53853     shanxi         110.9500       36.7000           93       164     2012      08        17        230              0.293792      24.866180      60.279854       0.294568       0.176000       0.401700       0.124700       0.941000
53853     53853     shanxi         110.9500       36.7000           93       164     2012      08        18        231              0.286826      21.540497       4.944537       0.378046   -9999.000000       0.197800       0.141100   -9999.000000
53853     53853     shanxi         110.9500       36.7000           93       164     2012      08        19        232              0.267625      21.391724       0.949961       0.343237       0.172000   -9999.000000       0.121900       0.824000
53853     53853     shanxi         110.9500       36.7000           93       164     2012      08        20        233              0.270458      23.274078       1.461567       0.323179       0.163000       0.157100       0.165500   -9999.000000
53853     53853     shanxi         110.9500       36.7000           93       164     2012      08        21        234              0.258167      23.195496       0.000000       0.319456       0.141000       0.185600   -9999.000000       0.878000
53853     53853     shanxi         110.9500       36.7000           93       164     2012      08        22        235              0.246167      19.674652       0.000000       0.307850       0.129000   -9999.000000       0.144200   -9999.000000
53853     53853     shanxi         110.9500       36.7000           93       164     2012      08        23        236              0.237542      20.739990       0.000000       0.301276       0.125000       0.210400       0.160900       0.571000
53853     53853     shanxi         110.9500       36.7000           93       164     2012      08        24        237              0.230625      19.805237       0.000000       0.295744   -9999.000000   -9999.000000       0.150400       0.444000
53853     53853     shanxi         110.9500       36.7000           93       164     2012      08        25        238              0.000000      21.798492       0.608505       0.290847       0.145000       0.107100       0.140500   -9999.000000
53853     53853     shanxi         110.9500       36.7000           93       164     2012      08        26        239              0.223500      22.636383       1.324618       0.289279       0.135500       0.170200       0.153000       0.626000
53853     53853     shanxi         110.9500       36.7000           93       164     2012      08        27        240              0.219417      22.208679       2.087706       0.295282       0.132500   -9999.000000   -9999.000000   -9999.000000
53853     53853     shanxi         110.9500       36.7000           93       164     2012      08        28        241              0.215042      22.859039       0.105920       0.294008       0.125000       0.061500       0.130000       0.703000
53853     53853     shanxi         110.9500       36.7000           93       164     2012      08        29        242              0.209750      23.748657       0.000000       0.285882       0.135000       0.123500       0.133800       0.442000
53853     53853     shanxi         110.9500       36.7000           93       164     2012      08        30        243              0.204500      23.906555       0.014386       0.277136       0.142000   -9999.000000       0.118000       0.568000
53853     53853     shanxi         110.9500       36.7000           93       164     2012      08        31        244              0.201292      23.109009      10.317554       0.270154       0.117000       0.202300       0.135400       0.387000
53853     53853     shanxi         110.9500       36.7000           93       164     2012      09        01        245              0.301000      21.113739      56.647820       0.289843       0.174000   -9999.000000   -9999.000000   -9999.000000
53853     53853     shanxi         110.9500       36.7000           93       164     2012      09        02        246              0.274000      17.829956       0.000000       0.371200       0.185000       0.286700       0.155900       0.927000
53853     53853     shanxi         110.9500       36.7000           93       164     2012      09        03        247              0.259043      18.122345       0.000000       0.331241       0.145000       0.145300       0.144400       0.747000
53853     53853     shanxi         110.9500       36.7000           93       164     2012      09        04        248              0.250250      18.834015       0.175099       0.318181       0.168000       0.158900       0.148900       0.838000
53853     53853     shanxi         110.9500       36.7000           93       164     2012      09        05        249              0.267826      20.333862      13.707772       0.310554   -9999.000000       0.170200       0.130800       0.813000
53853     53853     shanxi         110.9500       36.7000           93       164     2012      09        06        250              0.296455      20.336365      24.892462       0.326176       0.166000   -9999.000000       0.150400   -9999.000000
53853     53853     shanxi         110.9500       36.7000           93       164     2012      09        07        251              0.270000      17.239777       0.000000       0.357480       0.182000   -9999.000000   -9999.000000       0.969000
53853     53853     shanxi         110.9500       36.7000           93       164     2012      09        08        252              0.258833      20.644379       1.248088       0.327809       0.175000       0.174200       0.143800       0.886000
53853     53853     shanxi         110.9500       36.7000           93       164     2012      09        09        253              0.251208      20.558929       0.285388       0.321347   -9999.000000   -9999.000000       0.146400       0.937000
53853     53853     shanxi         110.9500       36.7000           93       164     2012      09        10        254              0.262125      20.522278       7.635840       0.311699       0.177000       0.225100       0.142700       0.896000
53853     53853     shanxi         110.9500       36.7000           93       164     2012      09        11        255              0.256417      17.856903       1.095520       0.328399       0.152000   -9999.000000       0.125800   -9999.000000
53853     53853     shanxi         110.9500       36.7000           93       164     2012      09        12        256              0.246455      18.090637       0.000000       0.318268       0.146500       0.144200       0.143500       0.792000
53853     53853     shanxi         110.9500       36.7000           93       164     2012      09        13        257              0.239571      13.780762       0.000000       0.311089       0.132000       0.262200   -9999.000000       0.610000
53853     53853     shanxi         110.9500       36.7000           93       164     2012      09        14        258              0.234292      14.983337       0.000000       0.305033       0.128000   -9999.000000       0.123900       0.487000
53853     53853     shanxi         110.9500       36.7000           93       164     2012      09        15        259              0.229792      16.780762       0.110767       0.300153       0.147000       0.120600       0.133800       0.484000
53853     53853     shanxi         110.9500       36.7000           93       164     2012      09        16        260              0.225333      17.027313       0.000000       0.295685       0.140000       0.227000       0.119800   -9999.000000
53853     53853     shanxi         110.9500       36.7000           93       164     2012      09        17        261              0.224000      16.815613       0.954650       0.293123       0.128000       0.168600       0.119300       0.535000
53853     53853     shanxi         110.9500       36.7000           93       164     2012      09        18        262              0.234652      17.008575       0.451104       0.293715       0.150000       0.141200   -9999.000000   -9999.000000
53853     53853     shanxi         110.9500       36.7000           93       164     2012      09        19        263              0.227083      17.816010       0.522908       0.294399       0.126000   -9999.000000       0.109700       0.405000
53853     53853     shanxi         110.9500       36.7000           93       164     2012      09        20        264              0.227565      18.628784       6.615678       0.288480       0.167000       0.173900       0.129300   -9999.000000
53853     53853     shanxi         110.9500       36.7000           93       164     2012      09        21        265              0.238500      18.233246       0.499034       0.298280   -9999.000000       0.184300       0.128100       0.770000
53853     53853     shanxi         110.9500       36.7000           93       164     2012      09        22        266              0.231542      16.379791       0.000000       0.308511       0.134000       0.176300       0.115600       0.637000
53853     53853     shanxi         110.9500       36.7000           93       164     2012      09        23        267              0.225167      18.148193       0.000000       0.296974       0.123000       0.126800       0.120800   -9999.000000
53853     53853     shanxi         110.9500       36.7000           93       164     2012      09        24        268              0.221500      18.960297       0.606655       0.291427       0.124000   -9999.000000   -9999.000000       0.407000
53853     53853     shanxi         110.9500       36.7000           93       164     2012      09        25        269              0.239167      18.674225      13.197360       0.287829   -9999.000000   -9999.000000       0.152500   -9999.000000
53853     53853     shanxi         110.9500       36.7000           93       164     2012      09        26        270              0.241083      15.306305       0.203936       0.326717       0.158000       0.192100       0.153700       0.801000
53853     53853     shanxi         110.9500       36.7000           93       164     2012      09        27        271              0.235857      16.300629       0.000000       0.310196       0.151000   -9999.000000       0.147800       0.558000
53853     53853     shanxi         110.9500       36.7000           93       164     2012      09        28        272              0.222867      14.452057       0.000000       0.299020       0.130000   -9999.000000       0.140700       0.533000
53853     53853     shanxi         110.9500       36.7000           93       164     2012      09        29        273              0.219333      12.246368       0.000000       0.294032       0.138000   -9999.000000       0.147700       0.346000
53853     53853     shanxi         110.9500       36.7000           93       164     2012      09        30        274              0.214917      12.817505       0.000000       0.290686       0.133000   -9999.000000       0.152000   -9999.000000
53853     53853     shanxi         110.9500       36.7000           93       164     2012      10        01        275              0.212083      13.665955       0.000000       0.287427       0.129000       0.186600       0.097600       0.505000
53853     53853     shanxi         110.9500       36.7000           93       164     2012      10        02        276              0.210167      15.425873       0.000000       0.284641       0.120000   -9999.000000       0.107300       0.404000
53853     53853     shanxi         110.9500       36.7000           93       164     2012      10        03        277              0.207875      16.562439       0.000000       0.282645       0.113000       0.068700       0.092700       0.483000
53853     53853     shanxi         110.9500       36.7000           93       164     2012      10        04        278              0.208542      16.642273       2.266519       0.279330       0.139500   -9999.000000       0.109700       0.611000
53853     53853     shanxi         110.9500       36.7000           93       164     2012      10        05        279              0.209583      13.631622       0.254272       0.291310       0.119000       0.121800   -9999.000000   -9999.000000
53853     53853     shanxi         110.9500       36.7000           93       164     2012      10        06        280              0.207250      13.590576       0.000000       0.285389   -9999.000000       0.164100       0.104200       0.465000
53853     53853     shanxi         110.9500       36.7000           93       164     2012      10        07        281              0.205667      15.226257       0.000000       0.280611       0.125000   -9999.000000       0.101700       0.443000
53853     53853     shanxi         110.9500       36.7000           93       164     2012      10        08        282              0.204833      13.960938       0.874289       0.281167       0.116000   -9999.000000       0.109300       0.429000
53853     53853     shanxi         110.9500       36.7000           93       164     2012      10        09        283              0.202208      14.724579       0.000000       0.283281       0.114000       0.127200       0.090300       0.348000
53853     53853     shanxi         110.9500       36.7000           93       164     2012      10        10        284              0.199500      11.869080       0.000000       0.279025       0.112000       0.350900       0.106300   -9999.000000
53853     53853     shanxi         110.9500       36.7000           93       164     2012      10        11        285              0.198125      12.992615       0.000000       0.275692       0.094000       0.142700   -9999.000000       0.383000
53853     53853     shanxi         110.9500       36.7000           93       164     2012      10        12        286              0.197000      13.958130       0.000000       0.275026       0.105000   -9999.000000       0.093500       0.358000
53853     53853     shanxi         110.9500       36.7000           93       164     2012      10        13        287              0.194500      13.881165       0.000000       0.272469       0.106000       0.372400       0.099100       0.226000
53853     53853     shanxi         110.9500       36.7000           93       164     2012      10        14        288              0.193125      14.130951       0.314199       0.269677       0.097000       0.176800       0.092400       0.452000
53853     53853     shanxi         110.9500       36.7000           93       164     2012      10        15        289              0.193958      14.443817       2.586642       0.270937       0.112000       0.101500       0.095700   -9999.000000
53853     53853     shanxi         110.9500       36.7000           93       164     2012      10        16        290              0.197875      12.930054       0.000000       0.279030       0.103000       0.356800   -9999.000000       0.451000
53853     53853     shanxi         110.9500       36.7000           93       164     2012      10        17        291              0.195500       8.223358       0.000000       0.278872       0.120000   -9999.000000       0.107900   -9999.000000
53853     53853     shanxi         110.9500       36.7000           93       164     2012      10        18        292              0.194125       9.030090       0.000000       0.274249       0.111000       0.103000       0.091600       0.292000
53853     53853     shanxi         110.9500       36.7000           93       164     2012      10        19        293              0.193042      10.277649       0.000000       0.273588       0.102000       0.136400       0.101800   -9999.000000
53853     53853     shanxi         110.9500       36.7000           93       164     2012      10        20        294              0.191917      11.808563       0.000000       0.271530       0.100000   -9999.000000       0.089400       0.343000
53853     53853     shanxi         110.9500       36.7000           93       164     2012      10        21        295              0.202875      14.306610       6.796305       0.270261   -9999.000000       0.154200       0.112000       0.698000
53853     53853     shanxi         110.9500       36.7000           93       164     2012      10        22        296              0.209208       6.798248       0.264948       0.301779   -9999.000000   -9999.000000   -9999.000000   -9999.000000
53853     53853     shanxi         110.9500       36.7000           93       164     2012      10        23        297              0.205917       7.141052       0.226231       0.289641   -9999.000000       0.171100       0.088600       0.446000
53853     53853     shanxi         110.9500       36.7000           93       164     2012      10        24        298              0.203500       7.608917       0.000000       0.285389   -9999.000000       0.149600       0.093100   -9999.000000
53853     53853     shanxi         110.9500       36.7000           93       164     2012      10        25        299              0.000000       8.915680       0.000000       0.281163       0.100000   -9999.000000       0.086100       0.457000
53853     53853     shanxi         110.9500       36.7000           93       164     2012      10        26        300              0.199375      10.817993       0.305596       0.278806       0.109000       0.095600       0.084100       0.384000
53853     53853     shanxi         110.9500       36.7000           93       164     2012      10        27        301              0.198500       8.247101       0.000000       0.282128       0.104000       0.132100       0.089800       0.527000
53853     53853     shanxi         110.9500       36.7000           93       164     2012      10        28        302              0.000000      10.172180       0.115679       0.278664       0.110000       0.230500   -9999.000000       0.407000
53853     53853     shanxi         110.9500       36.7000           93       164     2012      10        29        303              0.194833      11.241577       0.000000       0.276513   -9999.000000       0.053500       0.070200   -9999.000000
53853     53853     shanxi         110.9500       36.7000           93       164     2012      10        30        304              0.192333       8.520325       0.000000       0.272645       0.087000   -9999.000000       0.077800       0.303000
53853     53853     shanxi         110.9500       36.7000           93       164     2012      10        31        305              0.190667       5.656982       0.000000       0.267224       0.100000   -9999.000000       0.072200       0.235000
53853     53853     shanxi         110.9500       36.7000           93       164     2012      11        01        306              0.189917       6.079498       0.000000       0.268085       0.082000       0.259400       0.082200       0.430000
53853     53853     shanxi         110.9500       36.7000           93       164     2012      11        02        307              0.204708       7.092224       3.642351       0.270114   -9999.000000   -9999.000000   -9999.000000       0.259000
53853     53853     shanxi         110.9500       36.7000           93       164     2012      11        03        308              0.252458       9.649109       1.935794       0.276811   -9999.000000   -9999.000000       0.072300   -9999.000000
53853     53853     shanxi         110.9500       36.7000           93       164     2012      11        04        309              0.239125       1.276520       0.312922       0.241269   -9999.000000   -9999.000000       0.064200       0.601000
53853     53853     shanxi         110.9500       36.7000           93       164     2012      11        05        310              0.229708      -1.161377       0.278764       0.183226       0.090000   -9999.000000       0.063400       0.366000
53853     53853     shanxi         110.9500       36.7000           93       164     2012      11        06        311              0.226333       0.360504       0.501560       0.209958       0.100000       0.081300       0.075200       0.597000
53853     53853     shanxi         110.9500       36.7000           93       164     2012      11        07        312              0.224833       3.435577       0.014064       0.265172       0.109000   -9999.000000       0.085000       0.548000
53853     53853     shanxi         110.9500       36.7000           93       164     2012      11        08        313              0.221375       2.904297       0.000000       0.261726   -9999.000000       0.030400   -9999.000000   -9999.000000
53853     53853     shanxi         110.9500       36.7000           93       164     2012      11        09        314              0.223083       5.371735       2.826501       0.276267       0.110000   -9999.000000       0.071100       0.670000
53853     53853     shanxi         110.9500       36.7000           93       164     2012      11        10        315              0.233542       4.046753       1.210116       0.289522   -9999.000000       0.115700       0.065700       0.402000
53853     53853     shanxi         110.9500       36.7000           93       164     2012      11        11        316              0.225000       1.082550       0.530859       0.246596       0.102000       0.095400       0.066300       0.278000
53853     53853     shanxi         110.9500       36.7000           93       164     2012      11        12        317              0.220875       0.174866       0.298305       0.213129       0.100000   -9999.000000       0.073600       0.366000
53853     53853     shanxi         110.9500       36.7000           93       164     2012      11        13        318              0.000000       1.646271       0.000000       0.238886   -9999.000000       0.040400       0.071300   -9999.000000
53853     53853     shanxi         110.9500       36.7000           93       164     2012      11        14        319              0.216130       1.743896       0.000000       0.233858   -9999.000000       0.063100   -9999.000000       0.371000
53853     53853     shanxi         110.9500       36.7000           93       164     2012      11        15        320              0.219792       3.456665       0.996038       0.264697   -9999.000000   -9999.000000       0.049700   -9999.000000
53853     53853     shanxi         110.9500       36.7000           93       164     2012      11        16        321              0.223208       1.722473       0.509862       0.260539       0.099000       0.040400       0.055500       0.369000
53853     53853     shanxi         110.9500       36.7000           93       164     2012      11        17        322              0.000000       1.353882       0.000000       0.232801       0.109000   -9999.000000       0.065500   -9999.000000
53853     53853     shanxi         110.9500       36.7000           93       164     2012      11        18        323              0.218333       3.549713       0.000000       0.262748       0.101000   -9999.000000       0.070500       0.571000
53853     53853     shanxi         110.9500       36.7000           93       164     2012      11        19        324              0.215417       3.012787       0.000000       0.254244   -9999.000000       0.102800   -9999.000000       0.478000
53853     53853     shanxi         110.9500       36.7000           93       164     2012      11        20        325              0.216917       3.397949       0.052838       0.267654       0.104000   -9999.000000       0.066100   -9999.000000
53853     53853     shanxi         110.9500       36.7000           93       164     2012      11        21        326              0.215750       3.774597       0.000000       0.281996       0.086000       0.255700       0.063300       0.480000
53853     53853     shanxi         110.9500       36.7000           93       164     2012      11        22        327              0.213750       5.065704       0.000000       0.282705       0.093000   -9999.000000       0.055900   -9999.000000
53853     53853     shanxi         110.9500       36.7000           93       164     2012      11        23        328              0.210083       1.761780       0.000000       0.251224       0.085000   -9999.000000       0.057700       0.394000
53853     53853     shanxi         110.9500       36.7000           93       164     2012      11        24        329              0.204750       0.454529       0.000000       0.214104   -9999.000000       0.120800       0.066200       0.461000
53853     53853     shanxi         110.9500       36.7000           93       164     2012      11        25        330              0.206333       1.975189       0.276637       0.248953   -9999.000000       0.143200   -9999.000000       0.248000
53853     53853     shanxi         110.9500       36.7000           93       164     2012      11        26        331              0.199083       0.199432       0.000000       0.217838       0.078000       0.034600   -9999.000000       0.135000
53853     53853     shanxi         110.9500       36.7000           93       164     2012      11        27        332              0.192583      -0.375702       0.277422       0.199394       0.082000   -9999.000000       0.049300   -9999.000000
53853     53853     shanxi         110.9500       36.7000           93       164     2012      11        28        333              0.186208       0.709900       0.000000       0.215235       0.076000       0.130200       0.045000       0.066000
53853     53853     shanxi         110.9500       36.7000           93       164     2012      11        29        334              0.161875      -1.912750       0.000000       0.180363   -9999.000000       0.060900       0.051600       0.004000
53853     53853     shanxi         110.9500       36.7000           93       164     2012      11        30        335              0.150792      -1.025879       0.062178       0.189538   -9999.000000   -9999.000000   -9999.000000       0.181000
53853     53853     shanxi         110.9500       36.7000           93       164     2012      12        01        336              0.171833       0.710632       1.206231       0.209244   -9999.000000       0.048000       0.053300       0.121000
53853     53853     shanxi         110.9500       36.7000           93       164     2012      12        02        337              0.156917      -0.925659       0.000000       0.190825       0.076000       0.153200       0.044400   -9999.000000
53853     53853     shanxi         110.9500       36.7000           93       164     2012      12        03        338              0.144810      -0.063080       0.000000       0.205440       0.074000       0.093600       0.055700       0.019000
53853     53853     shanxi         110.9500       36.7000           93       164     2012      12        04        339              0.131583      -1.941010       0.000000       0.177016       0.072000       0.149700       0.048000       0.025000
53853     53853     shanxi         110.9500       36.7000           93       164     2012      12        05        340              0.122375      -0.332245       0.000000       0.201875   -9999.000000   -9999.000000       0.051500       0.045000
53853     53853     shanxi         110.9500       36.7000           93       164     2012      12        06        341              0.119333      -3.080780       0.251921       0.163777   -9999.000000   -9999.000000   -9999.000000       0.011000
53853     53853     shanxi         110.9500       36.7000           93       164     2012      12        07        342              0.115958      -0.748840       0.000000       0.193813       0.072000       0.232200       0.043900   -9999.000000
53853     53853     shanxi         110.9500       36.7000           93       164     2012      12        08        343              0.109792      -2.397003       0.000000       0.174990       0.075000       0.111700       0.046100   -9999.000000
53853     53853     shanxi         110.9500       36.7000           93       164     2012      12        09        344              0.107708      -5.352448       0.053833       0.147452       0.080000       0.067300       0.050700   -9999.000000
53853     53853     shanxi         110.9500       36.7000           93       164     2012      12        10        345              0.107625      -2.889801       0.000000       0.169844   -9999.000000   -9999.000000       0.045700       0.060000
53853     53853     shanxi         110.9500       36.7000           93       164     2012      12        11        346              0.107833      -2.302063       0.000000       0.179280   -9999.000000   -9999.000000       0.051400   -9999.000000
53853     53853     shanxi         110.9500       36.7000           93       164     2012      12        12        347              0.108792      -0.641418       0.224778       0.191940       0.075000       0.041000   -9999.000000   -9999.000000
53853     53853     shanxi         110.9500       36.7000           93       164     2012      12        13        348              0.112000       0.147797       1.058280       0.198551   -9999.000000   -9999.000000       0.048600       0.014000
53853     53853     shanxi         110.9500       36.7000           93       164     2012      12        14        349              0.113958      -0.753418       0.057035       0.185192       0.086000       0.016600       0.054700   -9999.000000
53853     53853     shanxi         110.9500       36.7000           93       164     2012      12        15        350              0.000000      -0.888153       0.170295       0.190992       0.090000   -9999.000000       0.051100       0.192000
53853     53853     shanxi         110.9500       36.7000           93       164     2012      12        16        351              0.120000       0.116058       0.000000       0.201272   -9999.000000   -9999.000000       0.057200   -9999.000000
53853     53853     shanxi         110.9500       36.7000           93       164     2012      12        17        352              0.116042      -0.220062       0.000000       0.196898   -9999.000000       0.039400   -9999.000000       0.120000
53853     53853     shanxi         110.9500       36.7000           93       164     2012      12        18        353              0.108542      -2.773071       0.000000       0.169701       0.072000       0.240400       0.057700   -9999.000000
53853     53853     shanxi         110.9500       36.7000           93       164     2012      12        19        354              0.108708      -1.908936       1.624719       0.176677   -9999.000000   -9999.000000       0.048400   -9999.000000
53853     53853     shanxi         110.9500       36.7000           93       164     2012      12        20        355              0.000000      -1.230438       1.037735       0.176301   -9999.000000       0.069900       0.050600       0.025000
53853     53853     shanxi         110.9500       36.7000           93       164     2012      12        21        356              0.110333      -2.927612       0.057212       0.154465   -9999.000000   -9999.000000       0.044800   -9999.000000
53853     53853     shanxi         110.9500       36.7000           93       164     2012      12        22        357              0.105833      -5.248138       0.129679       0.141524   -9999.000000   -9999.000000       0.051800       0.002000
53853     53853     shanxi         110.9500       36.7000           93       164     2012      12        23        358              0.102167      -8.359161       0.000000       0.133662   -9999.000000   -9999.000000   -9999.000000   -9999.000000
53853     53853     shanxi         110.9500       36.7000           93       164     2012      12        24        359              0.101450      -8.509979       0.000000       0.130281       0.080000   -9999.000000       0.045000   -9999.000000
53853     53853     shanxi         110.9500       36.7000           93       164     2012      12        25        360              0.101333      -6.886536       0.000000       0.134060   -9999.000000   -9999.000000       0.048800   -9999.000000
53853     53853     shanxi         110.9500       36.7000           93       164     2012      12        26        361              0.000000      -6.536133       0.000000       0.134758   -9999.000000       0.104400       0.044500   -9999.000000
53853     53853     shanxi         110.9500       36.7000           93       164     2012      12        27        362              0.102818      -4.665924       0.000000       0.145963   -9999.000000       0.049400       0.052200   -9999.000000
53853     53853     shanxi         110.9500       36.7000           93       164     2012      12        28        363              0.101000      -3.789917       0.118856       0.156687   -9999.000000   -9999.000000       0.046300   -9999.000000
53853     53853     shanxi         110.9500       36.7000           93       164     2012      12        29        364              0.000000      -6.105988       0.000000       0.137549   -9999.000000   -9999.000000   -9999.000000   -9999.000000
53853     53853     shanxi         110.9500       36.7000           93       164     2012      12        30        365              0.000000     -10.206146       0.000000       0.130015   -9999.000000   -9999.000000       0.041300   -9999.000000
53853     53853     shanxi         110.9500       36.7000           93       164     2012      12        31        366              0.097200      -8.756378       0.000000       0.127611   -9999.000000   -9999.000000       0.045800   -9999.000000
