# Supplementary material for: Research on Fusing Multisatellite Soil Moisture Data Based on Bayesian Model Averaging
Source: Hindawi journal article supplement (doi:10.1155/2018/9310838), 2018-06-25
Supplement: f1 [file 9310838.f1.zip › 2012_sm00-10cm_daily_ZDB_ZHY_53856_366days_allin.txt]

53856     53856     shanxi         110.7689       36.4583           94       163     2012      01        01        001              0.000000   -9999.000000       0.000000   -9999.000000       0.066000   -9999.000000       0.031800   -9999.000000
53856     53856     shanxi         110.7689       36.4583           94       163     2012      01        02        002              0.052292      -3.172546       0.000000       0.166157       0.074000       0.079300       0.033300   -9999.000000
53856     53856     shanxi         110.7689       36.4583           94       163     2012      01        03        003              0.000000      -4.510010       0.000000       0.158362   -9999.000000       0.049000   -9999.000000   -9999.000000
53856     53856     shanxi         110.7689       36.4583           94       163     2012      01        04        004              0.046375      -7.012909       0.161235       0.140269   -9999.000000       0.106500       0.030800   -9999.000000
53856     53856     shanxi         110.7689       36.4583           94       163     2012      01        05        005              0.046250      -7.022064       0.000000       0.141778   -9999.000000   -9999.000000       0.035600   -9999.000000
53856     53856     shanxi         110.7689       36.4583           94       163     2012      01        06        006              0.048875      -5.334564       0.000000       0.150740       0.066000   -9999.000000       0.032000       0.015000
53856     53856     shanxi         110.7689       36.4583           94       163     2012      01        07        007              0.052917      -2.843903       0.000000       0.169023   -9999.000000       0.122100       0.034000       0.009000
53856     53856     shanxi         110.7689       36.4583           94       163     2012      01        08        008              0.000000      -2.544708       0.000000       0.168288       0.070000   -9999.000000   -9999.000000   -9999.000000
53856     53856     shanxi         110.7689       36.4583           94       163     2012      01        09        009              0.053375      -2.952332       0.000000       0.168794   -9999.000000       0.279200   -9999.000000   -9999.000000
53856     53856     shanxi         110.7689       36.4583           94       163     2012      01        10        010              0.049917      -2.806091       0.000000       0.174115   -9999.000000   -9999.000000       0.033100   -9999.000000
53856     53856     shanxi         110.7689       36.4583           94       163     2012      01        11        011              0.049250      -3.528870       0.000000       0.168926       0.067000   -9999.000000       0.037100   -9999.000000
53856     53856     shanxi         110.7689       36.4583           94       163     2012      01        12        012              0.048667      -3.638458       0.000000       0.165934       0.070000       0.107700       0.032300   -9999.000000
53856     53856     shanxi         110.7689       36.4583           94       163     2012      01        13        013              0.049292      -3.373474       0.000000       0.170177       0.070000   -9999.000000       0.034500   -9999.000000
53856     53856     shanxi         110.7689       36.4583           94       163     2012      01        14        014              0.049292      -2.863281       0.000000       0.170441   -9999.000000   -9999.000000   -9999.000000   -9999.000000
53856     53856     shanxi         110.7689       36.4583           94       163     2012      01        15        015              0.050125      -3.193756       0.000000       0.168130   -9999.000000   -9999.000000       0.033900   -9999.000000
53856     53856     shanxi         110.7689       36.4583           94       163     2012      01        16        016              0.051167      -1.833710       0.000000       0.181527       0.067000   -9999.000000       0.032800   -9999.000000
53856     53856     shanxi         110.7689       36.4583           94       163     2012      01        17        017              0.000000      -2.029907       0.000000       0.178893       0.066000   -9999.000000       0.031700   -9999.000000
53856     53856     shanxi         110.7689       36.4583           94       163     2012      01        18        018              0.053958      -1.643921       0.000000       0.180180       0.069000       0.058400       0.031100   -9999.000000
53856     53856     shanxi         110.7689       36.4583           94       163     2012      01        19        019              0.056375      -1.181335       0.000000       0.188596       0.072000   -9999.000000       0.031400   -9999.000000
53856     53856     shanxi         110.7689       36.4583           94       163     2012      01        20        020              0.058000      -0.531372       0.674562       0.191856   -9999.000000       0.060300       0.031400   -9999.000000
53856     53856     shanxi         110.7689       36.4583           94       163     2012      01        21        021              0.054750      -2.934235       0.000000       0.165830   -9999.000000   -9999.000000       0.026600   -9999.000000
53856     53856     shanxi         110.7689       36.4583           94       163     2012      01        22        022              0.051333      -6.779327       0.000000       0.144231   -9999.000000   -9999.000000       0.028900   -9999.000000
53856     53856     shanxi         110.7689       36.4583           94       163     2012      01        23        023              0.049167      -8.575897       0.000000       0.136049   -9999.000000   -9999.000000       0.027900   -9999.000000
53856     53856     shanxi         110.7689       36.4583           94       163     2012      01        24        024              0.047125      -8.869354       0.000000       0.134269   -9999.000000   -9999.000000   -9999.000000       0.002000
53856     53856     shanxi         110.7689       36.4583           94       163     2012      01        25        025              0.046333      -8.579742       0.000000       0.135095   -9999.000000   -9999.000000   -9999.000000   -9999.000000
53856     53856     shanxi         110.7689       36.4583           94       163     2012      01        26        026              0.047083      -6.447784       0.000000       0.145602   -9999.000000   -9999.000000       0.031900   -9999.000000
53856     53856     shanxi         110.7689       36.4583           94       163     2012      01        27        027              0.048083      -4.208832       0.000000       0.161327       0.067000   -9999.000000       0.032600   -9999.000000
53856     53856     shanxi         110.7689       36.4583           94       163     2012      01        28        028              0.048875      -2.942322       0.000000       0.172062       0.079000   -9999.000000       0.033100   -9999.000000
53856     53856     shanxi         110.7689       36.4583           94       163     2012      01        29        029              0.049958      -2.230530       0.000000       0.179229       0.077000   -9999.000000       0.033000       0.006000
53856     53856     shanxi         110.7689       36.4583           94       163     2012      01        30        030              0.049917      -1.820068       0.000000       0.182890   -9999.000000       0.065600       0.033700   -9999.000000
53856     53856     shanxi         110.7689       36.4583           94       163     2012      01        31        031              0.054833      -0.867523       0.000000       0.189645   -9999.000000       0.033200   -9999.000000       0.082000
53856     53856     shanxi         110.7689       36.4583           94       163     2012      02        01        032              0.050458       0.893433       0.000000       0.206886       0.069000   -9999.000000       0.031300   -9999.000000
53856     53856     shanxi         110.7689       36.4583           94       163     2012      02        02        033              0.047250      -3.512390       0.000000       0.174070       0.069000       0.040900       0.033900   -9999.000000
53856     53856     shanxi         110.7689       36.4583           94       163     2012      02        03        034              0.049500      -4.356750       0.084677       0.161115       0.071000   -9999.000000       0.031900   -9999.000000
53856     53856     shanxi         110.7689       36.4583           94       163     2012      02        04        035              0.052667      -1.866669       0.000000       0.179861       0.075000   -9999.000000       0.033200       0.010000
53856     53856     shanxi         110.7689       36.4583           94       163     2012      02        05        036              0.055167      -0.691101       0.000000       0.191019   -9999.000000       0.034900   -9999.000000       0.014000
53856     53856     shanxi         110.7689       36.4583           94       163     2012      02        06        037              0.049625      -0.014008       0.000000       0.198242   -9999.000000   -9999.000000       0.035400   -9999.000000
53856     53856     shanxi         110.7689       36.4583           94       163     2012      02        07        038              0.046583      -4.070587       0.000000       0.169892       0.061000   -9999.000000       0.032400   -9999.000000
53856     53856     shanxi         110.7689       36.4583           94       163     2012      02        08        039              0.044083      -5.996490       0.000000       0.150041   -9999.000000   -9999.000000       0.037200   -9999.000000
53856     53856     shanxi         110.7689       36.4583           94       163     2012      02        09        040              0.045500      -7.591400       0.000000       0.137375   -9999.000000       0.093400       0.032900   -9999.000000
53856     53856     shanxi         110.7689       36.4583           94       163     2012      02        10        041              0.048417      -5.587982       0.000000       0.147588   -9999.000000   -9999.000000       0.035800   -9999.000000
53856     53856     shanxi         110.7689       36.4583           94       163     2012      02        11        042              0.051458      -3.271790       0.000000       0.172516   -9999.000000   -9999.000000   -9999.000000   -9999.000000
53856     53856     shanxi         110.7689       36.4583           94       163     2012      02        12        043              0.053042      -0.248383       0.000000       0.190749   -9999.000000   -9999.000000   -9999.000000   -9999.000000
53856     53856     shanxi         110.7689       36.4583           94       163     2012      02        13        044              0.052458      -0.291199       0.000000       0.196094   -9999.000000       0.047100   -9999.000000       0.013000
53856     53856     shanxi         110.7689       36.4583           94       163     2012      02        14        045              0.052625      -0.293152       4.188113       0.196798       0.063000   -9999.000000       0.037500       0.070000
53856     53856     shanxi         110.7689       36.4583           94       163     2012      02        15        046              0.054708      -0.316467       0.000000       0.194051   -9999.000000   -9999.000000       0.038400   -9999.000000
53856     53856     shanxi         110.7689       36.4583           94       163     2012      02        16        047              0.051750      -0.153412       0.000000       0.198767   -9999.000000   -9999.000000       0.036000   -9999.000000
53856     53856     shanxi         110.7689       36.4583           94       163     2012      02        17        048              0.048583      -1.976898       0.000000       0.184056       0.058000       0.113700   -9999.000000   -9999.000000
53856     53856     shanxi         110.7689       36.4583           94       163     2012      02        18        049              0.049542      -3.049408       2.257813       0.175577       0.067000   -9999.000000       0.035500   -9999.000000
53856     53856     shanxi         110.7689       36.4583           94       163     2012      02        19        050              0.053458      -2.600525       0.000000       0.177453       0.067000   -9999.000000       0.041800       0.034000
53856     53856     shanxi         110.7689       36.4583           94       163     2012      02        20        051              0.060833       0.580231       0.000000       0.197295   -9999.000000   -9999.000000       0.040900       0.011000
53856     53856     shanxi         110.7689       36.4583           94       163     2012      02        21        052              0.070667       2.401001       0.000000       0.212576   -9999.000000   -9999.000000   -9999.000000   -9999.000000
53856     53856     shanxi         110.7689       36.4583           94       163     2012      02        22        053              0.082167       3.988831       0.000000       0.222604       0.057000   -9999.000000   -9999.000000       0.129000
53856     53856     shanxi         110.7689       36.4583           94       163     2012      02        23        054              0.095000       3.775421       0.000000       0.226358       0.060000       0.096100       0.043900       0.129000
53856     53856     shanxi         110.7689       36.4583           94       163     2012      02        24        055              0.108375       3.371674       0.000000       0.223849       0.076000   -9999.000000       0.041800       0.149000
53856     53856     shanxi         110.7689       36.4583           94       163     2012      02        25        056              0.106167       2.421844       0.000000       0.218311   -9999.000000       0.130100       0.044800       0.049000
53856     53856     shanxi         110.7689       36.4583           94       163     2012      02        26        057              0.105500      -0.123413       0.000000       0.197879   -9999.000000       0.039300       0.043700   -9999.000000
53856     53856     shanxi         110.7689       36.4583           94       163     2012      02        27        058              0.104458       1.638397       0.110952       0.207140   -9999.000000       0.238500   -9999.000000       0.054000
53856     53856     shanxi         110.7689       36.4583           94       163     2012      02        28        059              0.108583       2.756531       0.000000       0.214681       0.059000       0.100400   -9999.000000   -9999.000000
53856     53856     shanxi         110.7689       36.4583           94       163     2012      02        29        060              0.000000   -9999.000000       0.000000   -9999.000000       0.070000   -9999.000000   -9999.000000   -9999.000000
53856     53856     shanxi         110.7689       36.4583           94       163     2012      03        01        061              0.147792       2.991302       0.000000       0.221110       0.079000   -9999.000000       0.041100   -9999.000000
53856     53856     shanxi         110.7689       36.4583           94       163     2012      03        02        062              0.158542       2.220459       0.000000       0.222815   -9999.000000       0.078900       0.042400       0.196000
53856     53856     shanxi         110.7689       36.4583           94       163     2012      03        03        063              0.171625       1.903442       0.000000       0.220992   -9999.000000   -9999.000000       0.041300       0.229000
53856     53856     shanxi         110.7689       36.4583           94       163     2012      03        04        064              0.180625       2.036865       0.000000       0.219782       0.075500   -9999.000000       0.043500   -9999.000000
53856     53856     shanxi         110.7689       36.4583           94       163     2012      03        05        065              0.183333       3.301666       0.000000       0.224055       0.079000   -9999.000000   -9999.000000       0.233000
53856     53856     shanxi         110.7689       36.4583           94       163     2012      03        06        066              0.169125       2.654999       0.000000       0.214060       0.074000   -9999.000000       0.037000   -9999.000000
53856     53856     shanxi         110.7689       36.4583           94       163     2012      03        07        067              0.000000       1.288025       0.000000       0.203856   -9999.000000       0.071300       0.043600       0.192000
53856     53856     shanxi         110.7689       36.4583           94       163     2012      03        08        068              0.181167       4.123108       0.000000       0.221681   -9999.000000   -9999.000000       0.041300       0.275000
53856     53856     shanxi         110.7689       36.4583           94       163     2012      03        09        069              0.184042       4.287445       0.000000       0.227871       0.073000       0.032500       0.044300       0.355000
53856     53856     shanxi         110.7689       36.4583           94       163     2012      03        10        070              0.183083       4.849579       0.000000       0.225547       0.067000   -9999.000000   -9999.000000       0.211000
53856     53856     shanxi         110.7689       36.4583           94       163     2012      03        11        071              0.182167       5.478516       0.000000       0.220052       0.070000   -9999.000000       0.045800   -9999.000000
53856     53856     shanxi         110.7689       36.4583           94       163     2012      03        12        072              0.184417       5.187866       0.000000       0.221494       0.073000   -9999.000000       0.037300       0.248000
53856     53856     shanxi         110.7689       36.4583           94       163     2012      03        13        073              0.183792       6.256195       0.000000       0.221693   -9999.000000   -9999.000000       0.043800       0.250000
53856     53856     shanxi         110.7689       36.4583           94       163     2012      03        14        074              0.186167       8.149597       0.000000       0.223150       0.066000       0.130300   -9999.000000       0.339000
53856     53856     shanxi         110.7689       36.4583           94       163     2012      03        15        075              0.186250       9.952545       0.000000       0.224227       0.081500       0.114100       0.050400       0.618000
53856     53856     shanxi         110.7689       36.4583           94       163     2012      03        16        076              0.190333       5.060425       0.000000       0.227551       0.068000   -9999.000000   -9999.000000   -9999.000000
53856     53856     shanxi         110.7689       36.4583           94       163     2012      03        17        077              0.190583       9.096527       0.140413       0.225225       0.065000       0.145300       0.040900       0.327000
53856     53856     shanxi         110.7689       36.4583           94       163     2012      03        18        078              0.189917      11.784851       0.000000       0.221739       0.076000   -9999.000000       0.048300       0.360000
53856     53856     shanxi         110.7689       36.4583           94       163     2012      03        19        079              0.187833      10.469757       0.000000       0.217335       0.076000       0.074600       0.047300       0.580000
53856     53856     shanxi         110.7689       36.4583           94       163     2012      03        20        080              0.189250       7.738495       0.000000       0.218979       0.067000       0.065400       0.049100       0.259000
53856     53856     shanxi         110.7689       36.4583           94       163     2012      03        21        081              0.199208       8.960907       0.000000       0.218044       0.102000   -9999.000000       0.061800   -9999.000000
53856     53856     shanxi         110.7689       36.4583           94       163     2012      03        22        082              0.212125       4.181885       0.000000       0.220202       0.097000   -9999.000000   -9999.000000       0.708000
53856     53856     shanxi         110.7689       36.4583           94       163     2012      03        23        083              0.206250       4.441254       0.000000       0.222943   -9999.000000   -9999.000000       0.044700       0.318000
53856     53856     shanxi         110.7689       36.4583           94       163     2012      03        24        084              0.203417       6.601227       0.000000       0.214391   -9999.000000       0.137000   -9999.000000       0.299000
53856     53856     shanxi         110.7689       36.4583           94       163     2012      03        25        085              0.000000       9.722931       0.000000       0.211628       0.064000       0.048400       0.044900       0.274000
53856     53856     shanxi         110.7689       36.4583           94       163     2012      03        26        086              0.200417      12.041473       0.000000       0.204879       0.069000   -9999.000000       0.049700   -9999.000000
53856     53856     shanxi         110.7689       36.4583           94       163     2012      03        27        087              0.198208      13.287994       0.000000       0.197191       0.062000       0.053100   -9999.000000       0.226000
53856     53856     shanxi         110.7689       36.4583           94       163     2012      03        28        088              0.196958      14.327606       0.340426       0.190399       0.085000   -9999.000000       0.061500   -9999.000000
53856     53856     shanxi         110.7689       36.4583           94       163     2012      03        29        089              0.200750      13.414337       0.000000       0.194195       0.074000   -9999.000000       0.051500       0.224000
53856     53856     shanxi         110.7689       36.4583           94       163     2012      03        30        090              0.195333      14.222443       0.000000       0.194173       0.055000       0.117900       0.048000   -9999.000000
53856     53856     shanxi         110.7689       36.4583           94       163     2012      03        31        091              0.195375       9.630798       0.000000       0.190756       0.063500   -9999.000000       0.046300       0.272000
53856     53856     shanxi         110.7689       36.4583           94       163     2012      04        01        092              0.194917      14.032379       0.000000       0.185569       0.065000       0.181300       0.047100       0.237000
53856     53856     shanxi         110.7689       36.4583           94       163     2012      04        02        093              0.190083      16.067871       1.126824       0.181447       0.071000   -9999.000000   -9999.000000       0.220000
53856     53856     shanxi         110.7689       36.4583           94       163     2012      04        03        094              0.189333      10.636719       0.000000       0.182710       0.069000   -9999.000000       0.048800       0.193000
53856     53856     shanxi         110.7689       36.4583           94       163     2012      04        04        095              0.189667      12.911041       0.000000       0.180284       0.063500   -9999.000000       0.054800   -9999.000000
53856     53856     shanxi         110.7689       36.4583           94       163     2012      04        05        096              0.187875      15.984100       0.000000       0.176808       0.060000   -9999.000000       0.044700       0.108000
53856     53856     shanxi         110.7689       36.4583           94       163     2012      04        06        097              0.186042      15.542603       0.000000       0.174618       0.062000       0.102600       0.047000       0.155000
53856     53856     shanxi         110.7689       36.4583           94       163     2012      04        07        098              0.185417      15.609222       0.000000       0.173474       0.064000       0.065200       0.046700       0.193000
53856     53856     shanxi         110.7689       36.4583           94       163     2012      04        08        099              0.185125      17.691620       0.000000       0.171675       0.063000   -9999.000000   -9999.000000       0.129000
53856     53856     shanxi         110.7689       36.4583           94       163     2012      04        09        100              0.183125      19.798218       0.095414       0.170002       0.072000       0.123600       0.052000   -9999.000000
53856     53856     shanxi         110.7689       36.4583           94       163     2012      04        10        101              0.182167      18.738617       0.443381       0.171672       0.064500   -9999.000000       0.060200       0.109000
53856     53856     shanxi         110.7689       36.4583           94       163     2012      04        11        102              0.180958      18.479492       5.784173       0.177175       0.067000   -9999.000000       0.043700       0.060000
53856     53856     shanxi         110.7689       36.4583           94       163     2012      04        12        103              0.181167      14.793701       0.000000       0.195704       0.080000   -9999.000000       0.053200       0.689000
53856     53856     shanxi         110.7689       36.4583           94       163     2012      04        13        104              0.183292      12.673126       0.000000       0.241574       0.073000   -9999.000000   -9999.000000       0.150000
53856     53856     shanxi         110.7689       36.4583           94       163     2012      04        14        105              0.180750      16.449066       0.122580       0.213888       0.071000       0.131300       0.052500   -9999.000000
53856     53856     shanxi         110.7689       36.4583           94       163     2012      04        15        106              0.181000      16.603516       0.000000       0.200766       0.058500   -9999.000000       0.045900       0.009000
53856     53856     shanxi         110.7689       36.4583           94       163     2012      04        16        107              0.179917      18.820740       0.000000       0.188513       0.061500       0.176700       0.058700       0.059000
53856     53856     shanxi         110.7689       36.4583           94       163     2012      04        17        108              0.176042      19.387543       0.000000       0.178694       0.060000       0.093900       0.052100       0.152000
53856     53856     shanxi         110.7689       36.4583           94       163     2012      04        18        109              0.181208      17.655823       0.510358       0.177402   -9999.000000   -9999.000000   -9999.000000       0.026000
53856     53856     shanxi         110.7689       36.4583           94       163     2012      04        19        110              0.180292      20.616974       0.056932       0.176666       0.064000       0.087200   -9999.000000   -9999.000000
53856     53856     shanxi         110.7689       36.4583           94       163     2012      04        20        111              0.178708      19.340149       0.000000       0.174330       0.071000       0.253200       0.054800       0.061000
53856     53856     shanxi         110.7689       36.4583           94       163     2012      04        21        112              0.178167      19.719208       0.000000       0.172906       0.059000   -9999.000000       0.057400       0.066000
53856     53856     shanxi         110.7689       36.4583           94       163     2012      04        22        113              0.178000      21.664856       0.000000       0.169858       0.061000   -9999.000000   -9999.000000       0.064000
53856     53856     shanxi         110.7689       36.4583           94       163     2012      04        23        114              0.197333      24.871063      10.542725       0.167257       0.064000   -9999.000000       0.066100       0.065000
53856     53856     shanxi         110.7689       36.4583           94       163     2012      04        24        115              0.236833      24.685608       1.305664       0.218333       0.104000       0.139600       0.100800   -9999.000000
53856     53856     shanxi         110.7689       36.4583           94       163     2012      04        25        116              0.000000      15.593018       0.000000       0.262859       0.081000       0.151200       0.088600       0.248000
53856     53856     shanxi         110.7689       36.4583           94       163     2012      04        26        117              0.210333      16.211304       0.000000       0.231805       0.065000   -9999.000000       0.075900   -9999.000000
53856     53856     shanxi         110.7689       36.4583           94       163     2012      04        27        118              0.206917      19.842163       0.000000       0.212893       0.062000       0.361100   -9999.000000       0.136000
53856     53856     shanxi         110.7689       36.4583           94       163     2012      04        28        119              0.203583      22.133148      12.521583       0.195780       0.061000   -9999.000000       0.054300   -9999.000000
53856     53856     shanxi         110.7689       36.4583           94       163     2012      04        29        120              0.200875      23.036438       0.000000       0.266226       0.072000       0.029100       0.068400       0.157000
53856     53856     shanxi         110.7689       36.4583           94       163     2012      04        30        121              0.195542      23.051788       0.541276       0.252592       0.067000       0.035200   -9999.000000       0.223000
53856     53856     shanxi         110.7689       36.4583           94       163     2012      05        01        122              0.193083      21.208344       0.168376       0.235334       0.082000   -9999.000000       0.093100       0.122000
53856     53856     shanxi         110.7689       36.4583           94       163     2012      05        02        123              0.193333      19.215668       2.565142       0.230930       0.075500       0.082700       0.088600       0.115000
53856     53856     shanxi         110.7689       36.4583           94       163     2012      05        03        124              0.190375      22.018188       0.000000       0.218025       0.071000   -9999.000000       0.086400   -9999.000000
53856     53856     shanxi         110.7689       36.4583           94       163     2012      05        04        125              0.188208      22.677765       0.000000       0.203881       0.072000   -9999.000000       0.077700       0.061000
53856     53856     shanxi         110.7689       36.4583           94       163     2012      05        05        126              0.185833      24.381317       0.000000       0.189447       0.068000   -9999.000000       0.073700       0.127000
53856     53856     shanxi         110.7689       36.4583           94       163     2012      05        06        127              0.182833      25.675415       0.776657       0.179690       0.057000   -9999.000000   -9999.000000       0.080000
53856     53856     shanxi         110.7689       36.4583           94       163     2012      05        07        128              0.180958      26.745758       0.177317       0.178465   -9999.000000       0.200800       0.080700       0.111000
53856     53856     shanxi         110.7689       36.4583           94       163     2012      05        08        129              0.182875      22.535858       2.842803       0.187812       0.065000   -9999.000000       0.084700   -9999.000000
53856     53856     shanxi         110.7689       36.4583           94       163     2012      05        09        130              0.178167      25.733093       0.968974       0.201687   -9999.000000   -9999.000000       0.075500       0.176000
53856     53856     shanxi         110.7689       36.4583           94       163     2012      05        10        131              0.177417      24.762299       1.367613       0.193032       0.072000   -9999.000000       0.072000       0.100000
53856     53856     shanxi         110.7689       36.4583           94       163     2012      05        11        132              0.169000      27.031403       0.865947       0.182505       0.097500   -9999.000000   -9999.000000       0.763000
53856     53856     shanxi         110.7689       36.4583           94       163     2012      05        12        133              0.168000      18.879181       0.000000       0.212863       0.079500       0.145800       0.082300       0.001000
53856     53856     shanxi         110.7689       36.4583           94       163     2012      05        13        134              0.165042      18.514740       0.047903       0.194188   -9999.000000       0.044200       0.076500   -9999.000000
53856     53856     shanxi         110.7689       36.4583           94       163     2012      05        14        135              0.165250      17.590942       0.000000       0.185565       0.076000   -9999.000000       0.104800       0.013000
53856     53856     shanxi         110.7689       36.4583           94       163     2012      05        15        136              0.168292      20.808411       0.000000       0.176214       0.079000   -9999.000000       0.091900       0.001000
53856     53856     shanxi         110.7689       36.4583           94       163     2012      05        16        137              0.169583      22.260681       0.000000       0.169656       0.076000   -9999.000000       0.095200       0.140000
53856     53856     shanxi         110.7689       36.4583           94       163     2012      05        17        138              0.171333      22.794525       0.000000       0.166803       0.075500       0.107100   -9999.000000       0.011000
53856     53856     shanxi         110.7689       36.4583           94       163     2012      05        18        139              0.173583      25.486908       0.098183       0.164905       0.084000       0.051700       0.099500   -9999.000000
53856     53856     shanxi         110.7689       36.4583           94       163     2012      05        19        140              0.174500      27.773346       0.000000       0.164109       0.075000   -9999.000000       0.101600       0.084000
53856     53856     shanxi         110.7689       36.4583           94       163     2012      05        20        141              0.174208      29.252258       1.396826       0.163525   -9999.000000       0.154900       0.112800       0.015000
53856     53856     shanxi         110.7689       36.4583           94       163     2012      05        21        142              0.167000      28.214874       3.411868       0.167364       0.120000   -9999.000000       0.116400       0.664000
53856     53856     shanxi         110.7689       36.4583           94       163     2012      05        22        143              0.168250      18.519409       0.000000       0.221875       0.085500       0.157300       0.090200       0.038000
53856     53856     shanxi         110.7689       36.4583           94       163     2012      05        23        144              0.168250      20.976746       0.183028       0.207598   -9999.000000       0.130900   -9999.000000   -9999.000000
53856     53856     shanxi         110.7689       36.4583           94       163     2012      05        24        145              0.167500      21.842590       0.000000       0.188973       0.086000   -9999.000000       0.096800       0.069000
53856     53856     shanxi         110.7689       36.4583           94       163     2012      05        25        146              0.000000      20.544159       0.000000       0.180953       0.087000       0.087500       0.102100   -9999.000000
53856     53856     shanxi         110.7689       36.4583           94       163     2012      05        26        147              0.172417      23.863068       0.782584       0.171890       0.084000   -9999.000000       0.089300       0.038000
53856     53856     shanxi         110.7689       36.4583           94       163     2012      05        27        148              0.173417      26.402069       0.000000       0.166505       0.080500   -9999.000000       0.090700   -9999.000000
53856     53856     shanxi         110.7689       36.4583           94       163     2012      05        28        149              0.174750      28.314911      24.656885       0.163656       0.072000       0.218100   -9999.000000       0.056000
53856     53856     shanxi         110.7689       36.4583           94       163     2012      05        29        150              0.210333      26.468903       0.000000       0.233678       0.088000   -9999.000000       0.115400       0.541000
53856     53856     shanxi         110.7689       36.4583           94       163     2012      05        30        151              0.205250      22.520905       0.000000       0.285302       0.080000       0.171500       0.101600   -9999.000000
53856     53856     shanxi         110.7689       36.4583           94       163     2012      05        31        152              0.199375      24.085236       0.000000       0.250883       0.090000       0.115700       0.091200   -9999.000000
53856     53856     shanxi         110.7689       36.4583           94       163     2012      06        01        153              0.197167      23.679321       5.574251       0.234911       0.079500   -9999.000000       0.088600   -9999.000000
53856     53856     shanxi         110.7689       36.4583           94       163     2012      06        02        154              0.195125      24.144653       0.688732       0.218521       0.074500   -9999.000000       0.090200       0.125000
53856     53856     shanxi         110.7689       36.4583           94       163     2012      06        03        155              0.192167      25.460968       0.000000       0.204745       0.076000   -9999.000000   -9999.000000       0.049000
53856     53856     shanxi         110.7689       36.4583           94       163     2012      06        04        156              0.190000      25.690277       0.155620       0.194956       0.072000       0.117300       0.096000       0.111000
53856     53856     shanxi         110.7689       36.4583           94       163     2012      06        05        157              0.187000      27.313385       2.334775       0.185607   -9999.000000       0.077200       0.105800       0.097000
53856     53856     shanxi         110.7689       36.4583           94       163     2012      06        06        158              0.181458      25.658752       0.545499       0.199198       0.091000       0.172300       0.095900   -9999.000000
53856     53856     shanxi         110.7689       36.4583           94       163     2012      06        07        159              0.186875      20.304871       2.829473       0.212806       0.098000       0.099300       0.093400       0.037000
53856     53856     shanxi         110.7689       36.4583           94       163     2012      06        08        160              0.193000      23.892090       0.000000       0.222296       0.081000   -9999.000000       0.089900       0.112000
53856     53856     shanxi         110.7689       36.4583           94       163     2012      06        09        161              0.193708      23.547943       0.000000       0.208893       0.073000       0.106700   -9999.000000       0.225000
53856     53856     shanxi         110.7689       36.4583           94       163     2012      06        10        162              0.189792      28.117249       0.000000       0.186433       0.076000       0.139300       0.091800       0.100000
53856     53856     shanxi         110.7689       36.4583           94       163     2012      06        11        163              0.000000      25.473755       4.619059       0.174909       0.080000   -9999.000000       0.167700   -9999.000000
53856     53856     shanxi         110.7689       36.4583           94       163     2012      06        12        164              0.183875      27.261688       0.000000       0.169131       0.071500       0.034900       0.154200       0.045000
53856     53856     shanxi         110.7689       36.4583           94       163     2012      06        13        165              0.180333      29.143250       0.043532       0.166255       0.080500   -9999.000000       0.149400       0.104000
53856     53856     shanxi         110.7689       36.4583           94       163     2012      06        14        166              0.176500      29.109741       0.000000       0.165292       0.077000   -9999.000000   -9999.000000       0.121000
53856     53856     shanxi         110.7689       36.4583           94       163     2012      06        15        167              0.172417      27.012512       0.000000       0.164729   -9999.000000       0.155400       0.165800       0.010000
53856     53856     shanxi         110.7689       36.4583           94       163     2012      06        16        168              0.169750      27.297699       0.000000       0.163612       0.073000   -9999.000000       0.154500   -9999.000000
53856     53856     shanxi         110.7689       36.4583           94       163     2012      06        17        169              0.165500      29.608307       0.000000       0.162243       0.074000       0.141300       0.164600       0.119000
53856     53856     shanxi         110.7689       36.4583           94       163     2012      06        18        170              0.161667      30.824310       0.000000       0.161829       0.074500       0.219400       0.094900       0.137000
53856     53856     shanxi         110.7689       36.4583           94       163     2012      06        19        171              0.156625      31.526978       0.696378       0.161187       0.085000   -9999.000000       0.098100       0.320000
53856     53856     shanxi         110.7689       36.4583           94       163     2012      06        20        172              0.152792      29.386475       2.725714       0.166951   -9999.000000       0.112200   -9999.000000       0.211000
53856     53856     shanxi         110.7689       36.4583           94       163     2012      06        21        173              0.153417      29.314850       2.274256       0.169072       0.086000   -9999.000000       0.109000   -9999.000000
53856     53856     shanxi         110.7689       36.4583           94       163     2012      06        22        174              0.155167      29.325714       1.462647       0.163456       0.082000   -9999.000000       0.107800       0.196000
53856     53856     shanxi         110.7689       36.4583           94       163     2012      06        23        175              0.157000      32.011566      16.431530       0.163197       0.072000       0.108700       0.100100   -9999.000000
53856     53856     shanxi         110.7689       36.4583           94       163     2012      06        24        176              0.238250      31.563263       0.961356       0.195542       0.114000       0.282800       0.125800       0.658000
53856     53856     shanxi         110.7689       36.4583           94       163     2012      06        25        177              0.225250      26.631866       0.289804       0.279491       0.106000       0.192400       0.109100   -9999.000000
53856     53856     shanxi         110.7689       36.4583           94       163     2012      06        26        178              0.215667      25.621552       0.483688       0.245870       0.104000   -9999.000000   -9999.000000       0.497000
53856     53856     shanxi         110.7689       36.4583           94       163     2012      06        27        179              0.208583      24.592834       0.265133       0.231238       0.102000   -9999.000000       0.099200       0.320000
53856     53856     shanxi         110.7689       36.4583           94       163     2012      06        28        180              0.203875      24.439301      13.294582       0.219517       0.117000       0.150800       0.115300       0.469000
53856     53856     shanxi         110.7689       36.4583           94       163     2012      06        29        181              0.241500      23.124878       2.483251       0.255305       0.127000   -9999.000000       0.117900       0.950000
53856     53856     shanxi         110.7689       36.4583           94       163     2012      06        30        182              0.234667      24.401337       0.000000       0.289405       0.094000       0.139600       0.095400   -9999.000000
53856     53856     shanxi         110.7689       36.4583           94       163     2012      07        01        183              0.224083      26.751495       0.000000       0.251301       0.095000   -9999.000000   -9999.000000       0.364000
53856     53856     shanxi         110.7689       36.4583           94       163     2012      07        02        184              0.213792      28.534058       0.000000       0.227351       0.093000   -9999.000000       0.137700       0.271000
53856     53856     shanxi         110.7689       36.4583           94       163     2012      07        03        185              0.203875      29.507538       5.055803       0.207337       0.086000       0.188900       0.135800       0.284000
53856     53856     shanxi         110.7689       36.4583           94       163     2012      07        04        186              0.192833      28.778412       0.272621       0.238178       0.089500   -9999.000000       0.138100       0.328000
53856     53856     shanxi         110.7689       36.4583           94       163     2012      07        05        187              0.188750      25.910980       0.000000       0.228603       0.084000       0.078000       0.124500   -9999.000000
53856     53856     shanxi         110.7689       36.4583           94       163     2012      07        06        188              0.178125      29.815735       0.000000       0.206557   -9999.000000       0.059900       0.116800       0.176000
53856     53856     shanxi         110.7689       36.4583           94       163     2012      07        07        189              0.171625      29.212677       0.893697       0.193947   -9999.000000   -9999.000000   -9999.000000       0.196000
53856     53856     shanxi         110.7689       36.4583           94       163     2012      07        08        190              0.261333      27.558502      44.912178       0.199195       0.128000       0.266600       0.170200       0.957000
53856     53856     shanxi         110.7689       36.4583           94       163     2012      07        09        191              0.272292      23.071716       3.559370       0.344835       0.112000   -9999.000000       0.189800       1.000000
53856     53856     shanxi         110.7689       36.4583           94       163     2012      07        10        192              0.259583      23.780518       0.000000       0.325626       0.096000   -9999.000000       0.180900   -9999.000000
53856     53856     shanxi         110.7689       36.4583           94       163     2012      07        11        193              0.247500      27.530823       0.397528       0.298831       0.088000       0.368700       0.163700       0.725000
53856     53856     shanxi         110.7689       36.4583           94       163     2012      07        12        194              0.238500      27.373901       0.000000       0.283106       0.103000       0.161800       0.149000       0.476000
53856     53856     shanxi         110.7689       36.4583           94       163     2012      07        13        195              0.229417      28.491516       7.829543       0.264839   -9999.000000       0.208300   -9999.000000       0.491000
53856     53856     shanxi         110.7689       36.4583           94       163     2012      07        14        196              0.225083      26.812225       1.454386       0.285953       0.102500   -9999.000000       0.163800       0.466000
53856     53856     shanxi         110.7689       36.4583           94       163     2012      07        15        197              0.216750      27.150970       0.286967       0.273304       0.107000       0.166700       0.172100   -9999.000000
53856     53856     shanxi         110.7689       36.4583           94       163     2012      07        16        198              0.209000      26.752747       0.000000       0.259009       0.093000       0.134200       0.110200       0.337000
53856     53856     shanxi         110.7689       36.4583           94       163     2012      07        17        199              0.211522      26.839386       0.000000       0.247145       0.104000   -9999.000000       0.105300   -9999.000000
53856     53856     shanxi         110.7689       36.4583           94       163     2012      07        18        200              0.211083      26.508331       0.000000       0.236853       0.103000       0.063800   -9999.000000       0.233000
53856     53856     shanxi         110.7689       36.4583           94       163     2012      07        19        201              0.204375      27.375702       0.000000       0.226821       0.090500   -9999.000000       0.104700       0.187000
53856     53856     shanxi         110.7689       36.4583           94       163     2012      07        20        202              0.198870      28.800232       1.064648       0.217364       0.090500       0.051500       0.117500   -9999.000000
53856     53856     shanxi         110.7689       36.4583           94       163     2012      07        21        203              0.213565      28.662720      26.956678       0.223368   -9999.000000       0.040600       0.135500       0.972000
53856     53856     shanxi         110.7689       36.4583           94       163     2012      07        22        204              0.226750      24.123322       0.189336       0.320539       0.104000   -9999.000000       0.121500   -9999.000000
53856     53856     shanxi         110.7689       36.4583           94       163     2012      07        23        205              0.218750      25.726868       0.465722       0.296725       0.124000       0.082600       0.096400       0.517000
53856     53856     shanxi         110.7689       36.4583           94       163     2012      07        24        206              0.244958      24.523926      11.690432       0.286320       0.121000       0.070400   -9999.000000   -9999.000000
53856     53856     shanxi         110.7689       36.4583           94       163     2012      07        25        207              0.242417      24.812592       0.171885       0.322720       0.110500   -9999.000000       0.100300       0.865000
53856     53856     shanxi         110.7689       36.4583           94       163     2012      07        26        208              0.278167      27.513397       4.105770       0.294783   -9999.000000   -9999.000000       0.109900       0.755000
53856     53856     shanxi         110.7689       36.4583           94       163     2012      07        27        209              0.271583      27.973450       0.144460       0.297869       0.112000   -9999.000000       0.096100       0.711000
53856     53856     shanxi         110.7689       36.4583           94       163     2012      07        28        210              0.260708      29.152374       0.390622       0.280134       0.117000   -9999.000000       0.086600       0.490000
53856     53856     shanxi         110.7689       36.4583           94       163     2012      07        29        211              0.251750      29.868225       4.217419       0.266906       0.104000       0.055800   -9999.000000   -9999.000000
53856     53856     shanxi         110.7689       36.4583           94       163     2012      07        30        212              0.262708      29.783600      21.081076       0.275718       0.118000       0.179900       0.128000       0.494000
53856     53856     shanxi         110.7689       36.4583           94       163     2012      07        31        213              0.273417      26.059448       1.259326       0.312118       0.144000       0.133800       0.116800       0.820000
53856     53856     shanxi         110.7689       36.4583           94       163     2012      08        01        214              0.262917      23.608795       0.178356       0.324028       0.123000   -9999.000000       0.122400       0.849000
53856     53856     shanxi         110.7689       36.4583           94       163     2012      08        02        215              0.253500      25.403076       0.223115       0.305492   -9999.000000   -9999.000000       0.104700       0.626000
53856     53856     shanxi         110.7689       36.4583           94       163     2012      08        03        216              0.242917      27.467316       0.235120       0.290050       0.120000       0.119400       0.099100   -9999.000000
53856     53856     shanxi         110.7689       36.4583           94       163     2012      08        04        217              0.232875      27.994629       0.000000       0.276564       0.107000   -9999.000000   -9999.000000       0.457000
53856     53856     shanxi         110.7689       36.4583           94       163     2012      08        05        218              0.224667      28.398987       0.968327       0.264697       0.110500       0.065200       0.107600       0.356000
53856     53856     shanxi         110.7689       36.4583           94       163     2012      08        06        219              0.217875      27.394165       0.000000       0.258643       0.115000   -9999.000000       0.123200       0.399000
53856     53856     shanxi         110.7689       36.4583           94       163     2012      08        07        220              0.209083      27.717987       0.000000       0.249015       0.099000       0.362500       0.113900       0.347000
53856     53856     shanxi         110.7689       36.4583           94       163     2012      08        08        221              0.205000      29.579376       2.320852       0.237110       0.117000       0.044400       0.118000   -9999.000000
53856     53856     shanxi         110.7689       36.4583           94       163     2012      08        09        222              0.206167      29.706512       0.810111       0.234384       0.120000   -9999.000000       0.116400       0.259000
53856     53856     shanxi         110.7689       36.4583           94       163     2012      08        10        223              0.199458      26.650848       0.000000       0.248332       0.101000       0.155400   -9999.000000       0.216000
53856     53856     shanxi         110.7689       36.4583           94       163     2012      08        11        224              0.192000      28.169891      23.414709       0.226280       0.124000       0.191700       0.136800       0.292000
53856     53856     shanxi         110.7689       36.4583           94       163     2012      08        12        225              0.203542      28.317291       0.942891       0.282678       0.129000   -9999.000000       0.136700       0.790000
53856     53856     shanxi         110.7689       36.4583           94       163     2012      08        13        226              0.213042      25.462982      24.870338       0.308844   -9999.000000   -9999.000000       0.108200   -9999.000000
53856     53856     shanxi         110.7689       36.4583           94       163     2012      08        14        227              0.271667      23.492279       6.060937       0.316321       0.145000   -9999.000000       0.123600       0.907000
53856     53856     shanxi         110.7689       36.4583           94       163     2012      08        15        228              0.257417      22.716858       0.000000       0.343055       0.116500   -9999.000000   -9999.000000       0.635000
53856     53856     shanxi         110.7689       36.4583           94       163     2012      08        16        229              0.246792      25.347565       0.308148       0.314632       0.116000       0.229100       0.081600       0.486000
53856     53856     shanxi         110.7689       36.4583           94       163     2012      08        17        230              0.264583      26.200195      35.130241       0.302666       0.148000   -9999.000000       0.118700       1.000000
53856     53856     shanxi         110.7689       36.4583           94       163     2012      08        18        231              0.273708      22.921143       8.308317       0.365633   -9999.000000       0.339700       0.122000   -9999.000000
53856     53856     shanxi         110.7689       36.4583           94       163     2012      08        19        232              0.260917      21.869110       0.000000       0.351019       0.149000   -9999.000000       0.117000       0.838000
53856     53856     shanxi         110.7689       36.4583           94       163     2012      08        20        233              0.253625      23.715881       0.087927       0.327833       0.128000       0.128100       0.154000   -9999.000000
53856     53856     shanxi         110.7689       36.4583           94       163     2012      08        21        234              0.242542      23.660980       0.000000       0.319792       0.112500       0.128700   -9999.000000       0.847000
53856     53856     shanxi         110.7689       36.4583           94       163     2012      08        22        235              0.231958      21.496338       0.000000       0.307824       0.115000       0.150800       0.142700   -9999.000000
53856     53856     shanxi         110.7689       36.4583           94       163     2012      08        23        236              0.223250      22.506897       0.000000       0.301323       0.112000       0.190000       0.155000       0.487000
53856     53856     shanxi         110.7689       36.4583           94       163     2012      08        24        237              0.215250      21.894806       0.000000       0.295165   -9999.000000   -9999.000000       0.140200       0.381000
53856     53856     shanxi         110.7689       36.4583           94       163     2012      08        25        238              0.000000      23.483612       1.375929       0.289381       0.122000   -9999.000000       0.140200   -9999.000000
53856     53856     shanxi         110.7689       36.4583           94       163     2012      08        26        239              0.205292      23.816345       0.373051       0.288486       0.115000       0.053500       0.136700       0.460000
53856     53856     shanxi         110.7689       36.4583           94       163     2012      08        27        240              0.199500      23.598083       0.416830       0.292392       0.114000   -9999.000000   -9999.000000   -9999.000000
53856     53856     shanxi         110.7689       36.4583           94       163     2012      08        28        241              0.192667      24.572815       0.000000       0.284433       0.103000       0.112000       0.116800       0.380000
53856     53856     shanxi         110.7689       36.4583           94       163     2012      08        29        242              0.182917      25.197052       0.000000       0.276680       0.108000       0.157100       0.119000       0.287000
53856     53856     shanxi         110.7689       36.4583           94       163     2012      08        30        243              0.173000      25.868439       0.000000       0.267737       0.111000   -9999.000000       0.111600       0.357000
53856     53856     shanxi         110.7689       36.4583           94       163     2012      08        31        244              0.170958      25.166656       8.918737       0.261639       0.111000   -9999.000000       0.125400       0.303000
53856     53856     shanxi         110.7689       36.4583           94       163     2012      09        01        245              0.238667      22.079163      45.597130       0.285539       0.139000   -9999.000000   -9999.000000   -9999.000000
53856     53856     shanxi         110.7689       36.4583           94       163     2012      09        02        246              0.257083      18.799927       0.000000       0.372792       0.136000       0.126800       0.141200       0.944000
53856     53856     shanxi         110.7689       36.4583           94       163     2012      09        03        247              0.247083      19.942017       0.000000       0.333764       0.124000       0.263000       0.173400       0.673000
53856     53856     shanxi         110.7689       36.4583           94       163     2012      09        04        248              0.240458      20.175049       0.000000       0.320207       0.138000   -9999.000000       0.175200       0.762000
53856     53856     shanxi         110.7689       36.4583           94       163     2012      09        05        249              0.245333      21.410797      21.097504       0.311858   -9999.000000       0.385500       0.156500       0.951000
53856     53856     shanxi         110.7689       36.4583           94       163     2012      09        06        250              0.264542      22.011780      15.398188       0.338277       0.146000   -9999.000000       0.168500   -9999.000000
53856     53856     shanxi         110.7689       36.4583           94       163     2012      09        07        251              0.258708      18.432617       0.000000       0.359056       0.145500   -9999.000000   -9999.000000       0.890000
53856     53856     shanxi         110.7689       36.4583           94       163     2012      09        08        252              0.253375      21.361389       1.573035       0.334842       0.133000       0.133600       0.175400       0.818000
53856     53856     shanxi         110.7689       36.4583           94       163     2012      09        09        253              0.246792      22.352997       0.000000       0.327918   -9999.000000   -9999.000000       0.175200       0.900000
53856     53856     shanxi         110.7689       36.4583           94       163     2012      09        10        254              0.255792      21.755402      13.550383       0.319029       0.145000       0.212200       0.138200       0.884000
53856     53856     shanxi         110.7689       36.4583           94       163     2012      09        11        255              0.255750      18.584412       1.217529       0.345462       0.129000   -9999.000000       0.126700   -9999.000000
53856     53856     shanxi         110.7689       36.4583           94       163     2012      09        12        256              0.246792      19.067596       0.000000       0.331844       0.125000   -9999.000000       0.130200       0.765000
53856     53856     shanxi         110.7689       36.4583           94       163     2012      09        13        257              0.240458      15.720062       0.000000       0.322069       0.111000       0.266100   -9999.000000       0.577000
53856     53856     shanxi         110.7689       36.4583           94       163     2012      09        14        258              0.235750      16.712494       0.000000       0.315535       0.116000   -9999.000000       0.120000       0.455000
53856     53856     shanxi         110.7689       36.4583           94       163     2012      09        15        259              0.230208      18.222198       0.000000       0.310344       0.132000       0.096700       0.135900       0.476000
53856     53856     shanxi         110.7689       36.4583           94       163     2012      09        16        260              0.225833      18.401672       0.000000       0.306432       0.124000       0.200600       0.120100   -9999.000000
53856     53856     shanxi         110.7689       36.4583           94       163     2012      09        17        261              0.223333      18.037720       0.460519       0.304608       0.111500   -9999.000000       0.131900       0.468000
53856     53856     shanxi         110.7689       36.4583           94       163     2012      09        18        262              0.223917      18.342438       0.293395       0.303231       0.121000       0.288800   -9999.000000   -9999.000000
53856     53856     shanxi         110.7689       36.4583           94       163     2012      09        19        263              0.221958      19.183563       0.000000       0.300416       0.110000   -9999.000000       0.130200       0.333000
53856     53856     shanxi         110.7689       36.4583           94       163     2012      09        20        264              0.219250      20.067841       4.911477       0.295496       0.141000       0.083800       0.147900   -9999.000000
53856     53856     shanxi         110.7689       36.4583           94       163     2012      09        21        265              0.222750      19.086548       0.492212       0.305106   -9999.000000       0.210700       0.149400       0.763000
53856     53856     shanxi         110.7689       36.4583           94       163     2012      09        22        266              0.223083      18.517792       0.000000       0.310268       0.109000       0.259100       0.132400       0.477000
53856     53856     shanxi         110.7689       36.4583           94       163     2012      09        23        267              0.222667      19.605743       0.000000       0.300835       0.104500       0.268000       0.131200       0.504000
53856     53856     shanxi         110.7689       36.4583           94       163     2012      09        24        268              0.220917      20.205109       0.000000       0.295520       0.109000   -9999.000000   -9999.000000       0.393000
53856     53856     shanxi         110.7689       36.4583           94       163     2012      09        25        269              0.220348      20.067139      11.202127       0.291697   -9999.000000       0.120600       0.180200   -9999.000000
53856     53856     shanxi         110.7689       36.4583           94       163     2012      09        26        270              0.223667      16.129700       0.000000       0.327497       0.123000       0.057600       0.170700       0.778000
53856     53856     shanxi         110.7689       36.4583           94       163     2012      09        27        271              0.225571      16.055176       0.000000       0.314209       0.115500   -9999.000000       0.158400       0.535000
53856     53856     shanxi         110.7689       36.4583           94       163     2012      09        28        272              0.220600      15.924713       0.000000       0.303392       0.108000   -9999.000000       0.155200       0.488000
53856     53856     shanxi         110.7689       36.4583           94       163     2012      09        29        273              0.218042      14.069244       0.000000       0.297621       0.112000   -9999.000000   -9999.000000       0.306000
53856     53856     shanxi         110.7689       36.4583           94       163     2012      09        30        274              0.216125      14.491150       1.221217       0.293870       0.105000       0.354900       0.155400   -9999.000000
53856     53856     shanxi         110.7689       36.4583           94       163     2012      10        01        275              0.214542      15.211273       0.000000       0.290390       0.106000       0.208600       0.122000       0.385000
53856     53856     shanxi         110.7689       36.4583           94       163     2012      10        02        276              0.214167      16.104767       0.000000       0.288296       0.098000   -9999.000000       0.135200       0.355000
53856     53856     shanxi         110.7689       36.4583           94       163     2012      10        03        277              0.214208      18.017212       0.000000       0.285899       0.089500       0.060800       0.118600       0.466000
53856     53856     shanxi         110.7689       36.4583           94       163     2012      10        04        278              0.209500      18.203827       2.192219       0.282008       0.117500   -9999.000000       0.128900       0.613000
53856     53856     shanxi         110.7689       36.4583           94       163     2012      10        05        279              0.210000      14.813293       0.000000       0.294092       0.101000   -9999.000000   -9999.000000   -9999.000000
53856     53856     shanxi         110.7689       36.4583           94       163     2012      10        06        280              0.208833      15.104736       0.000000       0.286226   -9999.000000       0.295500       0.129500       0.299000
53856     53856     shanxi         110.7689       36.4583           94       163     2012      10        07        281              0.206833      16.454224       0.000000       0.282091       0.108000   -9999.000000       0.132900       0.291000
53856     53856     shanxi         110.7689       36.4583           94       163     2012      10        08        282              0.206167      15.105560       0.416740       0.283049       0.095000       0.072300       0.115800       0.409000
53856     53856     shanxi         110.7689       36.4583           94       163     2012      10        09        283              0.205875      15.441742       0.000000       0.283599       0.094000       0.279100       0.105100       0.184000
53856     53856     shanxi         110.7689       36.4583           94       163     2012      10        10        284              0.203083      14.034668       0.000000       0.278487       0.096000       0.229900       0.102300   -9999.000000
53856     53856     shanxi         110.7689       36.4583           94       163     2012      10        11        285              0.202542      14.883423       0.000000       0.274954       0.084000   -9999.000000   -9999.000000       0.194000
53856     53856     shanxi         110.7689       36.4583           94       163     2012      10        12        286              0.201375      15.656647       0.000000       0.273782       0.086000   -9999.000000       0.111000       0.237000
53856     53856     shanxi         110.7689       36.4583           94       163     2012      10        13        287              0.199667      15.779938       0.000000       0.271069       0.088000   -9999.000000       0.117600       0.193000
53856     53856     shanxi         110.7689       36.4583           94       163     2012      10        14        288              0.197083      15.549255       0.064720       0.267514       0.081500       0.070400       0.101800       0.181000
53856     53856     shanxi         110.7689       36.4583           94       163     2012      10        15        289              0.195667      15.401917       4.001955       0.267655       0.094000       0.186800       0.105500   -9999.000000
53856     53856     shanxi         110.7689       36.4583           94       163     2012      10        16        290              0.193125      13.965546       0.000000       0.280620       0.092000       0.450100   -9999.000000       0.299000
53856     53856     shanxi         110.7689       36.4583           94       163     2012      10        17        291              0.191208      10.075226       0.000000       0.283647       0.099000   -9999.000000       0.118500   -9999.000000
53856     53856     shanxi         110.7689       36.4583           94       163     2012      10        18        292              0.172250      10.764252       0.227045       0.275539       0.092000       0.111200       0.112100       0.284000
53856     53856     shanxi         110.7689       36.4583           94       163     2012      10        19        293              0.171500      11.371826       0.000000       0.273349       0.085500       0.163300       0.117000   -9999.000000
53856     53856     shanxi         110.7689       36.4583           94       163     2012      10        20        294              0.172458      13.046722       0.000000       0.270367       0.084500   -9999.000000       0.103900       0.219000
53856     53856     shanxi         110.7689       36.4583           94       163     2012      10        21        295              0.168625      15.299988       6.377898       0.268561   -9999.000000       0.202100       0.119200       0.642000
53856     53856     shanxi         110.7689       36.4583           94       163     2012      10        22        296              0.167958       8.024261       0.239646       0.300951   -9999.000000   -9999.000000   -9999.000000       0.713000
53856     53856     shanxi         110.7689       36.4583           94       163     2012      10        23        297              0.165833       8.683899       0.000000       0.289439   -9999.000000   -9999.000000       0.095000       0.334000
53856     53856     shanxi         110.7689       36.4583           94       163     2012      10        24        298              0.167125       8.220612       0.000000       0.284528   -9999.000000       0.146600       0.104000   -9999.000000
53856     53856     shanxi         110.7689       36.4583           94       163     2012      10        25        299              0.000000      10.171997       0.000000       0.280095       0.084000   -9999.000000       0.090800       0.294000
53856     53856     shanxi         110.7689       36.4583           94       163     2012      10        26        300              0.167042      11.318970       0.105616       0.277210       0.092000       0.132700       0.092800       0.348000
53856     53856     shanxi         110.7689       36.4583           94       163     2012      10        27        301              0.167500       9.622314       0.000000       0.278730       0.088000       0.180300       0.091200       0.309000
53856     53856     shanxi         110.7689       36.4583           94       163     2012      10        28        302              0.000000      11.397278       0.000000       0.275361       0.098000   -9999.000000   -9999.000000       0.311000
53856     53856     shanxi         110.7689       36.4583           94       163     2012      10        29        303              0.166542      11.863525       0.000000       0.274192   -9999.000000       0.108100       0.076900   -9999.000000
53856     53856     shanxi         110.7689       36.4583           94       163     2012      10        30        304              0.163458      10.046844       0.000000       0.271267       0.085000   -9999.000000       0.085800       0.142000
53856     53856     shanxi         110.7689       36.4583           94       163     2012      10        31        305              0.162208       7.585846       0.000000       0.267978       0.095000       0.231200       0.073100       0.137000
53856     53856     shanxi         110.7689       36.4583           94       163     2012      11        01        306              0.161542       7.963409       0.000000       0.266611       0.083000       0.075900       0.076000       0.364000
53856     53856     shanxi         110.7689       36.4583           94       163     2012      11        02        307              0.162500       9.034515       6.643570       0.266924   -9999.000000       0.206400   -9999.000000       0.153000
53856     53856     shanxi         110.7689       36.4583           94       163     2012      11        03        308              0.172125      11.128906       1.100691       0.279657   -9999.000000   -9999.000000       0.076900   -9999.000000
53856     53856     shanxi         110.7689       36.4583           94       163     2012      11        04        309              0.173000       3.314240       0.169776       0.272773       0.096000   -9999.000000       0.074800       0.378000
53856     53856     shanxi         110.7689       36.4583           94       163     2012      11        05        310              0.171833       1.542633       0.101865       0.243295       0.088000   -9999.000000       0.068900       0.307000
53856     53856     shanxi         110.7689       36.4583           94       163     2012      11        06        311              0.171750       2.407471       0.137861       0.250112       0.095000       0.105200       0.078300       0.538000
53856     53856     shanxi         110.7689       36.4583           94       163     2012      11        07        312              0.171500       4.946411       0.030361       0.273514       0.096000   -9999.000000       0.083600       0.479000
53856     53856     shanxi         110.7689       36.4583           94       163     2012      11        08        313              0.171750       4.377289       0.000000       0.273566       0.101000   -9999.000000   -9999.000000   -9999.000000
53856     53856     shanxi         110.7689       36.4583           94       163     2012      11        09        314              0.172000       6.697540       0.675110       0.276539       0.108000   -9999.000000       0.077500       0.607000
53856     53856     shanxi         110.7689       36.4583           94       163     2012      11        10        315              0.173500       5.216003       0.409159       0.281534       0.103000   -9999.000000       0.070000   -9999.000000
53856     53856     shanxi         110.7689       36.4583           94       163     2012      11        11        316              0.172125       2.725555       0.599806       0.259699       0.100000       0.139800       0.074000       0.290000
53856     53856     shanxi         110.7689       36.4583           94       163     2012      11        12        317              0.171167       2.286072       0.000000       0.244659       0.096000   -9999.000000       0.074000       0.364000
53856     53856     shanxi         110.7689       36.4583           94       163     2012      11        13        318              0.000000       3.235016       0.000000       0.256163   -9999.000000       0.037200       0.070400   -9999.000000
53856     53856     shanxi         110.7689       36.4583           94       163     2012      11        14        319              0.169500       3.561951       0.000000       0.254403       0.092000       0.093700   -9999.000000       0.321000
53856     53856     shanxi         110.7689       36.4583           94       163     2012      11        15        320              0.169000       4.468567       0.066143       0.267748   -9999.000000   -9999.000000       0.055700   -9999.000000
53856     53856     shanxi         110.7689       36.4583           94       163     2012      11        16        321              0.172333       2.474335       0.514400       0.264676       0.088000       0.071700       0.063600       0.455000
53856     53856     shanxi         110.7689       36.4583           94       163     2012      11        17        322              0.000000       2.855927       0.000000       0.253936       0.096000   -9999.000000       0.071300   -9999.000000
53856     53856     shanxi         110.7689       36.4583           94       163     2012      11        18        323              0.171833       4.266022       0.000000       0.262501       0.091000   -9999.000000       0.072800       0.552000
53856     53856     shanxi         110.7689       36.4583           94       163     2012      11        19        324              0.170667       3.924805       0.000000       0.258332   -9999.000000       0.083200   -9999.000000       0.522000
53856     53856     shanxi         110.7689       36.4583           94       163     2012      11        20        325              0.172000       4.271362       0.000000       0.267538       0.099000   -9999.000000       0.067900       0.578000
53856     53856     shanxi         110.7689       36.4583           94       163     2012      11        21        326              0.173250       4.741211       0.000000       0.274586       0.081500       0.316600       0.067900       0.467000
53856     53856     shanxi         110.7689       36.4583           94       163     2012      11        22        327              0.170500       5.713531       0.000000       0.273306       0.087000   -9999.000000       0.064400   -9999.000000
53856     53856     shanxi         110.7689       36.4583           94       163     2012      11        23        328              0.167833       2.517883       0.000000       0.255467       0.082000       0.100500       0.062400       0.341000
53856     53856     shanxi         110.7689       36.4583           94       163     2012      11        24        329              0.167000       2.093689       0.000000       0.235853   -9999.000000       0.128500       0.069600       0.420000
53856     53856     shanxi         110.7689       36.4583           94       163     2012      11        25        330              0.167250       2.736145       0.000000       0.254934   -9999.000000   -9999.000000   -9999.000000       0.249000
53856     53856     shanxi         110.7689       36.4583           94       163     2012      11        26        331              0.164167       1.784821       0.000000       0.233688       0.072000       0.057000   -9999.000000       0.071000
53856     53856     shanxi         110.7689       36.4583           94       163     2012      11        27        332              0.163000       1.170074       0.521089       0.221769       0.082000   -9999.000000       0.055200   -9999.000000
53856     53856     shanxi         110.7689       36.4583           94       163     2012      11        28        333              0.161625       2.458588       0.000000       0.235729       0.077000       0.163000       0.050100       0.061000
53856     53856     shanxi         110.7689       36.4583           94       163     2012      11        29        334              0.155667      -0.429474       0.000000       0.203027   -9999.000000       0.048800       0.051000       0.022000
53856     53856     shanxi         110.7689       36.4583           94       163     2012      11        30        335              0.146667      -0.362610       0.000000       0.199946   -9999.000000   -9999.000000   -9999.000000       0.105000
53856     53856     shanxi         110.7689       36.4583           94       163     2012      12        01        336              0.152625       0.792664       0.183393       0.214244       0.077000       0.035600       0.058400       0.110000
53856     53856     shanxi         110.7689       36.4583           94       163     2012      12        02        337              0.150500       0.039948       0.000000       0.208439       0.073000   -9999.000000       0.051800   -9999.000000
53856     53856     shanxi         110.7689       36.4583           94       163     2012      12        03        338              0.149542       0.265839       0.000000       0.211274       0.077000   -9999.000000       0.055900       0.014000
53856     53856     shanxi         110.7689       36.4583           94       163     2012      12        04        339              0.140792      -0.336304       0.000000       0.200082       0.072000       0.064400       0.050300       0.066000
53856     53856     shanxi         110.7689       36.4583           94       163     2012      12        05        340              0.137833       0.606445       0.000000       0.213344   -9999.000000   -9999.000000       0.048400       0.006000
53856     53856     shanxi         110.7689       36.4583           94       163     2012      12        06        341              0.124458      -1.190186       0.000000       0.189787   -9999.000000   -9999.000000   -9999.000000       0.006000
53856     53856     shanxi         110.7689       36.4583           94       163     2012      12        07        342              0.125250       0.215942       0.000000       0.205724       0.072000       0.184800       0.047100   -9999.000000
53856     53856     shanxi         110.7689       36.4583           94       163     2012      12        08        343              0.102250      -0.671722       0.000000       0.196855       0.074000       0.047800       0.050400   -9999.000000
53856     53856     shanxi         110.7689       36.4583           94       163     2012      12        09        344              0.068958      -3.212738       0.000000       0.171323       0.074000       0.070500       0.046100   -9999.000000
53856     53856     shanxi         110.7689       36.4583           94       163     2012      12        10        345              0.063625      -2.025269       0.000000       0.179041   -9999.000000   -9999.000000       0.048400       0.041000
53856     53856     shanxi         110.7689       36.4583           94       163     2012      12        11        346              0.062125      -1.286102       0.000000       0.188093   -9999.000000       0.132300       0.046700   -9999.000000
53856     53856     shanxi         110.7689       36.4583           94       163     2012      12        12        347              0.064792      -0.707428       0.000000       0.192029       0.064000       0.026000   -9999.000000   -9999.000000
53856     53856     shanxi         110.7689       36.4583           94       163     2012      12        13        348              0.069750      -0.061371       0.000000       0.196715   -9999.000000   -9999.000000       0.051500   -9999.000000
53856     53856     shanxi         110.7689       36.4583           94       163     2012      12        14        349              0.075625      -0.524719       0.135704       0.192264   -9999.000000   -9999.000000       0.054800   -9999.000000
53856     53856     shanxi         110.7689       36.4583           94       163     2012      12        15        350              0.000000      -0.477417       0.000000       0.198240       0.082000   -9999.000000       0.057200       0.285000
53856     53856     shanxi         110.7689       36.4583           94       163     2012      12        16        351              0.085417       0.228424       0.000000       0.204546   -9999.000000       0.159900       0.055900   -9999.000000
53856     53856     shanxi         110.7689       36.4583           94       163     2012      12        17        352              0.086125       0.041016       0.000000       0.203880       0.073000       0.071900   -9999.000000       0.222000
53856     53856     shanxi         110.7689       36.4583           94       163     2012      12        18        353              0.067125      -1.344574       0.000000       0.189534       0.068000   -9999.000000       0.055200       0.006000
53856     53856     shanxi         110.7689       36.4583           94       163     2012      12        19        354              0.063167      -1.408264       0.000000       0.185345   -9999.000000       0.027200       0.052500   -9999.000000
53856     53856     shanxi         110.7689       36.4583           94       163     2012      12        20        355              0.000000      -1.201599       0.747841       0.181971   -9999.000000       0.063400       0.052100       0.033000
53856     53856     shanxi         110.7689       36.4583           94       163     2012      12        21        356              0.061708      -2.608673       0.000000       0.167280   -9999.000000       0.016900       0.048600   -9999.000000
53856     53856     shanxi         110.7689       36.4583           94       163     2012      12        22        357              0.053292      -4.233459       0.000000       0.157166   -9999.000000       0.064500       0.049400       0.006000
53856     53856     shanxi         110.7689       36.4583           94       163     2012      12        23        358              0.044667      -6.975952       0.000000       0.143729   -9999.000000   -9999.000000   -9999.000000   -9999.000000
53856     53856     shanxi         110.7689       36.4583           94       163     2012      12        24        359              0.042619      -8.090851       0.000000       0.136530       0.073000       0.036600       0.050300   -9999.000000
53856     53856     shanxi         110.7689       36.4583           94       163     2012      12        25        360              0.041375      -5.823914       0.000000       0.144613   -9999.000000       0.023900       0.053200   -9999.000000
53856     53856     shanxi         110.7689       36.4583           94       163     2012      12        26        361              0.000000      -6.000061       0.000000       0.142147   -9999.000000       0.122400       0.049200   -9999.000000
53856     53856     shanxi         110.7689       36.4583           94       163     2012      12        27        362              0.042500      -4.246124       0.000000       0.154549   -9999.000000       0.088700       0.048400   -9999.000000
53856     53856     shanxi         110.7689       36.4583           94       163     2012      12        28        363              0.000000      -3.158173       0.000000       0.166398   -9999.000000   -9999.000000       0.049600   -9999.000000
53856     53856     shanxi         110.7689       36.4583           94       163     2012      12        29        364              0.000000      -4.601105       0.000000       0.154173   -9999.000000       0.147100   -9999.000000   -9999.000000
53856     53856     shanxi         110.7689       36.4583           94       163     2012      12        30        365              0.000000      -7.826080       0.000000       0.139539       0.070000       0.059400       0.048800   -9999.000000
53856     53856     shanxi         110.7689       36.4583           94       163     2012      12        31        366              0.036467      -6.622162       0.000000       0.140868   -9999.000000       0.163300       0.047300   -9999.000000
