# Supplementary material for: Research on Fusing Multisatellite Soil Moisture Data Based on Bayesian Model Averaging
Source: Hindawi journal article supplement (doi:10.1155/2018/9310838), 2018-06-25
Supplement: f1 [file 9310838.f1.zip › 2012_sm00-10cm_daily_ZDB_ZHY_53857_366days_allin.txt]

53857     53857     shaanxi        110.1833       36.0667           96       161     2012      01        01        001              0.000000   -9999.000000       0.000000   -9999.000000       0.109000   -9999.000000       0.028900   -9999.000000
53857     53857     shaanxi        110.1833       36.0667           96       161     2012      01        02        002              0.139833      -2.086365       0.000000       0.184857       0.110000   -9999.000000   -9999.000000       0.020000
53857     53857     shaanxi        110.1833       36.0667           96       161     2012      01        03        003              0.000000      -3.092957       0.000000       0.180743   -9999.000000   -9999.000000       0.030800   -9999.000000
53857     53857     shaanxi        110.1833       36.0667           96       161     2012      01        04        004              0.125174      -6.531219       0.044937       0.160926   -9999.000000       0.196200       0.029900   -9999.000000
53857     53857     shaanxi        110.1833       36.0667           96       161     2012      01        05        005              0.124667      -6.926331       0.000000       0.159110   -9999.000000   -9999.000000       0.032300       0.011000
53857     53857     shaanxi        110.1833       36.0667           96       161     2012      01        06        006              0.130750      -4.962128       0.000000       0.166941       0.105000   -9999.000000       0.032400       0.042000
53857     53857     shaanxi        110.1833       36.0667           96       161     2012      01        07        007              0.137875      -2.308044       0.000000       0.181545       0.117000   -9999.000000       0.031000       0.041000
53857     53857     shaanxi        110.1833       36.0667           96       161     2012      01        08        008              0.000000      -1.782501       0.000000       0.186082       0.107000       0.013400   -9999.000000   -9999.000000
53857     53857     shaanxi        110.1833       36.0667           96       161     2012      01        09        009              0.138500      -2.124756       0.000000       0.185001   -9999.000000       0.471100   -9999.000000       0.002000
53857     53857     shaanxi        110.1833       36.0667           96       161     2012      01        10        010              0.133292      -2.018524       0.000000       0.186194   -9999.000000   -9999.000000       0.025700       0.029000
53857     53857     shaanxi        110.1833       36.0667           96       161     2012      01        11        011              0.132083      -3.087311       0.000000       0.180628       0.104000   -9999.000000       0.028500       0.011000
53857     53857     shaanxi        110.1833       36.0667           96       161     2012      01        12        012              0.130708      -2.857910       0.000000       0.180375       0.125000       0.162100       0.028100   -9999.000000
53857     53857     shaanxi        110.1833       36.0667           96       161     2012      01        13        013              0.133042      -2.220123       0.000000       0.184141       0.115000   -9999.000000       0.028900   -9999.000000
53857     53857     shaanxi        110.1833       36.0667           96       161     2012      01        14        014              0.129875      -1.900513       0.000000       0.185679   -9999.000000   -9999.000000   -9999.000000       0.033000
53857     53857     shaanxi        110.1833       36.0667           96       161     2012      01        15        015              0.128083      -2.924652       0.000000       0.180744   -9999.000000   -9999.000000       0.027600       0.003000
53857     53857     shaanxi        110.1833       36.0667           96       161     2012      01        16        016              0.130875      -2.390045       0.000000       0.182319       0.106000   -9999.000000       0.025000       0.065000
53857     53857     shaanxi        110.1833       36.0667           96       161     2012      01        17        017              0.000000      -1.520599       0.000000       0.186906       0.107000   -9999.000000       0.023900       0.021000
53857     53857     shaanxi        110.1833       36.0667           96       161     2012      01        18        018              0.136625      -1.120758       0.000000       0.189754       0.118000       0.013300       0.023900   -9999.000000
53857     53857     shaanxi        110.1833       36.0667           96       161     2012      01        19        019              0.139500      -1.094788       2.519274       0.191808       0.122000   -9999.000000   -9999.000000       0.083000
53857     53857     shaanxi        110.1833       36.0667           96       161     2012      01        20        020              0.140708      -0.339172       0.286361       0.194441   -9999.000000       0.017500       0.023800       0.022000
53857     53857     shaanxi        110.1833       36.0667           96       161     2012      01        21        021              0.135667      -1.880371       0.000000       0.185906   -9999.000000   -9999.000000       0.021200   -9999.000000
53857     53857     shaanxi        110.1833       36.0667           96       161     2012      01        22        022              0.129125      -5.588989       0.000000       0.164566   -9999.000000   -9999.000000       0.020800   -9999.000000
53857     53857     shaanxi        110.1833       36.0667           96       161     2012      01        23        023              0.124208      -7.685394       0.000000       0.155049   -9999.000000   -9999.000000       0.020700   -9999.000000
53857     53857     shaanxi        110.1833       36.0667           96       161     2012      01        24        024              0.120833      -8.306213       0.000000       0.150796   -9999.000000   -9999.000000   -9999.000000       0.036000
53857     53857     shaanxi        110.1833       36.0667           96       161     2012      01        25        025              0.119583      -8.101257       0.000000       0.154817   -9999.000000       0.012800   -9999.000000   -9999.000000
53857     53857     shaanxi        110.1833       36.0667           96       161     2012      01        26        026              0.122375      -5.916168       0.000000       0.163341   -9999.000000   -9999.000000       0.022700       0.050000
53857     53857     shaanxi        110.1833       36.0667           96       161     2012      01        27        027              0.124958      -3.052124       0.000000       0.179433       0.118000       0.193700       0.024200   -9999.000000
53857     53857     shaanxi        110.1833       36.0667           96       161     2012      01        28        028              0.130417      -2.213287       0.000000       0.183329       0.120000       0.103100       0.023600   -9999.000000
53857     53857     shaanxi        110.1833       36.0667           96       161     2012      01        29        029              0.133708      -1.284210       0.000000       0.188576       0.122000   -9999.000000       0.025600       0.089000
53857     53857     shaanxi        110.1833       36.0667           96       161     2012      01        30        030              0.133917      -0.760162       0.000000       0.192299   -9999.000000   -9999.000000       0.027100   -9999.000000
53857     53857     shaanxi        110.1833       36.0667           96       161     2012      01        31        031              0.143333      -0.049774       0.000000       0.193312   -9999.000000       0.016300   -9999.000000       0.260000
53857     53857     shaanxi        110.1833       36.0667           96       161     2012      02        01        032              0.130792       1.695587       0.000000       0.201453   -9999.000000   -9999.000000       0.025900   -9999.000000
53857     53857     shaanxi        110.1833       36.0667           96       161     2012      02        02        033              0.129250      -2.744690       0.000000       0.183081       0.105000       0.129600       0.026600       0.040000
53857     53857     shaanxi        110.1833       36.0667           96       161     2012      02        03        034              0.135333      -3.024231       0.000000       0.179022       0.113000   -9999.000000       0.027500       0.061000
53857     53857     shaanxi        110.1833       36.0667           96       161     2012      02        04        035              0.138583      -0.775604       0.000000       0.187978   -9999.000000   -9999.000000       0.027500       0.154000
53857     53857     shaanxi        110.1833       36.0667           96       161     2012      02        05        036              0.141000      -0.182709       0.000000       0.190995   -9999.000000       0.033900   -9999.000000       0.126000
53857     53857     shaanxi        110.1833       36.0667           96       161     2012      02        06        037              0.130708       0.530212       0.000000       0.194841   -9999.000000   -9999.000000       0.026000   -9999.000000
53857     53857     shaanxi        110.1833       36.0667           96       161     2012      02        07        038              0.122167      -3.357239       0.000000       0.180082   -9999.000000   -9999.000000       0.025200       0.003000
53857     53857     shaanxi        110.1833       36.0667           96       161     2012      02        08        039              0.115917      -5.682861       0.000000       0.167152   -9999.000000   -9999.000000       0.025500       0.009000
53857     53857     shaanxi        110.1833       36.0667           96       161     2012      02        09        040              0.119708      -6.910583       0.000000       0.151022   -9999.000000       0.109100       0.024800       0.012000
53857     53857     shaanxi        110.1833       36.0667           96       161     2012      02        10        041              0.129750      -4.633728       0.000000       0.164377   -9999.000000   -9999.000000       0.026900       0.033000
53857     53857     shaanxi        110.1833       36.0667           96       161     2012      02        11        042              0.135792      -2.527832       0.000000       0.180199   -9999.000000   -9999.000000   -9999.000000   -9999.000000
53857     53857     shaanxi        110.1833       36.0667           96       161     2012      02        12        043              0.136958       0.050598       0.000000       0.190798   -9999.000000   -9999.000000   -9999.000000       0.115000
53857     53857     shaanxi        110.1833       36.0667           96       161     2012      02        13        044              0.135458      -0.813232       0.000000       0.189274       0.104000       0.002300   -9999.000000       0.164000
53857     53857     shaanxi        110.1833       36.0667           96       161     2012      02        14        045              0.139042      -0.578186       0.000000       0.191407       0.096000   -9999.000000   -9999.000000       0.204000
53857     53857     shaanxi        110.1833       36.0667           96       161     2012      02        15        046              0.144250       0.181030       0.000000       0.193765   -9999.000000   -9999.000000       0.031100       0.112000
53857     53857     shaanxi        110.1833       36.0667           96       161     2012      02        16        047              0.146292       0.554382       0.000000       0.194838   -9999.000000   -9999.000000       0.026800   -9999.000000
53857     53857     shaanxi        110.1833       36.0667           96       161     2012      02        17        048              0.135792      -1.156921       0.000000       0.185394       0.085000   -9999.000000   -9999.000000       0.016000
53857     53857     shaanxi        110.1833       36.0667           96       161     2012      02        18        049              0.137708      -2.653229       0.000000       0.178948       0.103000       0.040400       0.025100       0.105000
53857     53857     shaanxi        110.1833       36.0667           96       161     2012      02        19        050              0.142917      -2.297119       0.000000       0.179126       0.100000   -9999.000000       0.028600       0.151000
53857     53857     shaanxi        110.1833       36.0667           96       161     2012      02        20        051              0.151417       0.093750       0.000000       0.186098   -9999.000000       0.067000       0.026700       0.155000
53857     53857     shaanxi        110.1833       36.0667           96       161     2012      02        21        052              0.169792       1.653870       0.000000       0.194855   -9999.000000   -9999.000000   -9999.000000   -9999.000000
53857     53857     shaanxi        110.1833       36.0667           96       161     2012      02        22        053              0.184333       3.424225       0.000000       0.198335       0.089000   -9999.000000   -9999.000000       0.380000
53857     53857     shaanxi        110.1833       36.0667           96       161     2012      02        23        054              0.190167       3.989136       0.000000       0.201684       0.086000   -9999.000000       0.027500   -9999.000000
53857     53857     shaanxi        110.1833       36.0667           96       161     2012      02        24        055              0.206750       2.120789       0.000000       0.199731       0.102000   -9999.000000       0.028500       0.324000
53857     53857     shaanxi        110.1833       36.0667           96       161     2012      02        25        056              0.197458       2.732819       0.000000       0.199514   -9999.000000       0.013500       0.029300   -9999.000000
53857     53857     shaanxi        110.1833       36.0667           96       161     2012      02        26        057              0.210083       0.470947       0.000000       0.192763   -9999.000000   -9999.000000       0.029800   -9999.000000
53857     53857     shaanxi        110.1833       36.0667           96       161     2012      02        27        058              0.208083       1.034943       0.000000       0.194231       0.097000       0.094400   -9999.000000       0.236000
53857     53857     shaanxi        110.1833       36.0667           96       161     2012      02        28        059              0.202458       2.151031       0.000000       0.193358       0.090000   -9999.000000   -9999.000000   -9999.000000
53857     53857     shaanxi        110.1833       36.0667           96       161     2012      02        29        060              0.000000   -9999.000000       0.000000   -9999.000000       0.099000   -9999.000000   -9999.000000   -9999.000000
53857     53857     shaanxi        110.1833       36.0667           96       161     2012      03        01        061              0.222750       2.519043       0.000000       0.197584       0.117000   -9999.000000       0.028100   -9999.000000
53857     53857     shaanxi        110.1833       36.0667           96       161     2012      03        02        062              0.229500       2.644318       0.000000       0.202040   -9999.000000       0.044400       0.027200       0.356000
53857     53857     shaanxi        110.1833       36.0667           96       161     2012      03        03        063              0.232792       2.623871       0.000000       0.203041   -9999.000000   -9999.000000       0.029400       0.272000
53857     53857     shaanxi        110.1833       36.0667           96       161     2012      03        04        064              0.233542       2.626404       0.000000       0.200776       0.104500       0.004400       0.027100       0.377000
53857     53857     shaanxi        110.1833       36.0667           96       161     2012      03        05        065              0.231708       3.715424       0.000000       0.201517       0.108000   -9999.000000   -9999.000000       0.365000
53857     53857     shaanxi        110.1833       36.0667           96       161     2012      03        06        066              0.224458       3.802032       0.000000       0.197330       0.106000   -9999.000000       0.027100   -9999.000000
53857     53857     shaanxi        110.1833       36.0667           96       161     2012      03        07        067              0.000000       1.796783       0.000000       0.189708       0.103000       0.030300       0.032000       0.304000
53857     53857     shaanxi        110.1833       36.0667           96       161     2012      03        08        068              0.222583       4.571747       0.000000       0.194342   -9999.000000   -9999.000000       0.030700       0.449000
53857     53857     shaanxi        110.1833       36.0667           96       161     2012      03        09        069              0.219792       4.488586       0.000000       0.195012       0.096000       0.074400       0.032100       0.448000
53857     53857     shaanxi        110.1833       36.0667           96       161     2012      03        10        070              0.215542       5.162842       0.000000       0.194347       0.104000   -9999.000000   -9999.000000       0.343000
53857     53857     shaanxi        110.1833       36.0667           96       161     2012      03        11        071              0.214042       6.595490       0.000000       0.190393       0.091000   -9999.000000       0.028200   -9999.000000
53857     53857     shaanxi        110.1833       36.0667           96       161     2012      03        12        072              0.213958       6.179138       0.000000       0.187200   -9999.000000       0.021800       0.025600       0.328000
53857     53857     shaanxi        110.1833       36.0667           96       161     2012      03        13        073              0.213917       6.729095       0.000000       0.184579   -9999.000000   -9999.000000       0.027500       0.547000
53857     53857     shaanxi        110.1833       36.0667           96       161     2012      03        14        074              0.215458       8.869141       0.000000       0.182838       0.090000       0.036400   -9999.000000       0.464000
53857     53857     shaanxi        110.1833       36.0667           96       161     2012      03        15        075              0.214625      10.274750       3.544335       0.181412       0.103000   -9999.000000       0.034000       0.498000
53857     53857     shaanxi        110.1833       36.0667           96       161     2012      03        16        076              0.215542       5.342499       0.000000       0.184608       0.094000   -9999.000000   -9999.000000   -9999.000000
53857     53857     shaanxi        110.1833       36.0667           96       161     2012      03        17        077              0.214083      10.456299       0.000000       0.181886       0.094000       0.010700       0.027200       0.568000
53857     53857     shaanxi        110.1833       36.0667           96       161     2012      03        18        078              0.213625      12.533722       0.074827       0.178273       0.100000   -9999.000000       0.032900       0.562000
53857     53857     shaanxi        110.1833       36.0667           96       161     2012      03        19        079              0.212042      12.570618       0.000000       0.176125       0.090500   -9999.000000       0.031700       0.526000
53857     53857     shaanxi        110.1833       36.0667           96       161     2012      03        20        080              0.211833       8.579590       0.300133       0.178062       0.090000       0.017100       0.034400       0.402000
53857     53857     shaanxi        110.1833       36.0667           96       161     2012      03        21        081              0.219792       9.154633       0.280092       0.179945       0.128000   -9999.000000   -9999.000000   -9999.000000
53857     53857     shaanxi        110.1833       36.0667           96       161     2012      03        22        082              0.233875       4.231415       0.000000       0.188279       0.118000       0.085300   -9999.000000       0.697000
53857     53857     shaanxi        110.1833       36.0667           96       161     2012      03        23        083              0.222958       5.359985       0.161838       0.192604   -9999.000000   -9999.000000       0.030700   -9999.000000
53857     53857     shaanxi        110.1833       36.0667           96       161     2012      03        24        084              0.218000       7.664062       0.000000       0.185308   -9999.000000   -9999.000000   -9999.000000       0.566000
53857     53857     shaanxi        110.1833       36.0667           96       161     2012      03        25        085              0.000000      10.595276       0.000000       0.179579       0.091500       0.069200       0.030900   -9999.000000
53857     53857     shaanxi        110.1833       36.0667           96       161     2012      03        26        086              0.213292      12.704895       0.000000       0.174210       0.095500   -9999.000000       0.039800   -9999.000000
53857     53857     shaanxi        110.1833       36.0667           96       161     2012      03        27        087              0.211917      13.140717       0.000000       0.171643       0.092000   -9999.000000   -9999.000000       0.598000
53857     53857     shaanxi        110.1833       36.0667           96       161     2012      03        28        088              0.211708      14.662720       0.463299       0.169741       0.109000   -9999.000000       0.045000   -9999.000000
53857     53857     shaanxi        110.1833       36.0667           96       161     2012      03        29        089              0.214958      12.971588       0.000000       0.172762       0.103000   -9999.000000       0.039600       0.594000
53857     53857     shaanxi        110.1833       36.0667           96       161     2012      03        30        090              0.210167      14.934296       0.000000       0.172973       0.088000       0.079900       0.039300   -9999.000000
53857     53857     shaanxi        110.1833       36.0667           96       161     2012      03        31        091              0.210042      10.038086       0.000000       0.171591       0.091000   -9999.000000       0.036700       0.482000
53857     53857     shaanxi        110.1833       36.0667           96       161     2012      04        01        092              0.208667      14.406830       0.029260       0.169071       0.099000       0.003500       0.037800       0.531000
53857     53857     shaanxi        110.1833       36.0667           96       161     2012      04        02        093              0.205792      15.946320       0.000000       0.168656   -9999.000000   -9999.000000   -9999.000000       0.445000
53857     53857     shaanxi        110.1833       36.0667           96       161     2012      04        03        094              0.205667      11.266998       0.000000       0.169761       0.095000   -9999.000000       0.035900       0.408000
53857     53857     shaanxi        110.1833       36.0667           96       161     2012      04        04        095              0.204208      14.470337       0.000000       0.167997       0.088500       0.025700       0.036800   -9999.000000
53857     53857     shaanxi        110.1833       36.0667           96       161     2012      04        05        096              0.201750      17.066833       0.000000       0.166582       0.085000   -9999.000000       0.032600       0.284000
53857     53857     shaanxi        110.1833       36.0667           96       161     2012      04        06        097              0.199917      16.280518       0.000000       0.166052       0.089000   -9999.000000       0.036800       0.482000
53857     53857     shaanxi        110.1833       36.0667           96       161     2012      04        07        098              0.200125      16.338623       0.000000       0.165845       0.091000       0.018600   -9999.000000       0.371000
53857     53857     shaanxi        110.1833       36.0667           96       161     2012      04        08        099              0.200875      18.111389       0.000000       0.165436       0.086000   -9999.000000       0.038400       0.478000
53857     53857     shaanxi        110.1833       36.0667           96       161     2012      04        09        100              0.200208      19.643860       0.128997       0.164889       0.094000       0.184500       0.039400   -9999.000000
53857     53857     shaanxi        110.1833       36.0667           96       161     2012      04        10        101              0.200958      18.117035       0.000000       0.167686       0.088000   -9999.000000       0.040200       0.503000
53857     53857     shaanxi        110.1833       36.0667           96       161     2012      04        11        102              0.200375      19.090515       2.012024       0.167680       0.085000   -9999.000000       0.033200       0.546000
53857     53857     shaanxi        110.1833       36.0667           96       161     2012      04        12        103              0.202250      16.450226       1.237233       0.176478       0.111000   -9999.000000       0.040200       0.800000
53857     53857     shaanxi        110.1833       36.0667           96       161     2012      04        13        104              0.202750      12.907684       0.000000       0.192348       0.094000   -9999.000000   -9999.000000       0.489000
53857     53857     shaanxi        110.1833       36.0667           96       161     2012      04        14        105              0.201042      16.993073       0.173228       0.177075       0.094000   -9999.000000       0.036600   -9999.000000
53857     53857     shaanxi        110.1833       36.0667           96       161     2012      04        15        106              0.199667      16.862488       0.000000       0.171261       0.083000   -9999.000000       0.036700       0.573000
53857     53857     shaanxi        110.1833       36.0667           96       161     2012      04        16        107              0.198125      20.100311       0.155183       0.166610       0.090000   -9999.000000       0.039300       0.471000
53857     53857     shaanxi        110.1833       36.0667           96       161     2012      04        17        108              0.195458      19.897095       1.195965       0.164992   -9999.000000   -9999.000000       0.037800       0.445000
53857     53857     shaanxi        110.1833       36.0667           96       161     2012      04        18        109              0.197458      16.138092       0.000000       0.167304   -9999.000000   -9999.000000   -9999.000000       0.473000
53857     53857     shaanxi        110.1833       36.0667           96       161     2012      04        19        110              0.196917      20.784790       0.000000       0.165861       0.087000       0.002900   -9999.000000   -9999.000000
53857     53857     shaanxi        110.1833       36.0667           96       161     2012      04        20        111              0.195458      20.907074       0.000000       0.164416       0.097000   -9999.000000       0.039200       0.505000
53857     53857     shaanxi        110.1833       36.0667           96       161     2012      04        21        112              0.195208      18.979553       0.000000       0.165153       0.101500   -9999.000000       0.038600   -9999.000000
53857     53857     shaanxi        110.1833       36.0667           96       161     2012      04        22        113              0.193667      22.217133       0.000000       0.163361       0.107000   -9999.000000   -9999.000000       0.494000
53857     53857     shaanxi        110.1833       36.0667           96       161     2012      04        23        114              0.203042      24.253998       5.249511       0.162358       0.111000   -9999.000000       0.042200   -9999.000000
53857     53857     shaanxi        110.1833       36.0667           96       161     2012      04        24        115              0.221667      23.813690       0.233789       0.199987       0.133000       0.218100   -9999.000000   -9999.000000
53857     53857     shaanxi        110.1833       36.0667           96       161     2012      04        25        116              0.000000      16.227264       0.000000       0.220248       0.104000   -9999.000000       0.047400       0.487000
53857     53857     shaanxi        110.1833       36.0667           96       161     2012      04        26        117              0.198375      17.053955       0.000000       0.191865       0.097500   -9999.000000       0.043300   -9999.000000
53857     53857     shaanxi        110.1833       36.0667           96       161     2012      04        27        118              0.193833      21.137360       0.000000       0.175984       0.094000       0.129000       0.038900       0.506000
53857     53857     shaanxi        110.1833       36.0667           96       161     2012      04        28        119              0.189792      23.169556       6.833691       0.169003       0.091000   -9999.000000       0.038400   -9999.000000
53857     53857     shaanxi        110.1833       36.0667           96       161     2012      04        29        120              0.187125      23.385040       0.000000       0.219880       0.104000   -9999.000000       0.040300       0.256000
53857     53857     shaanxi        110.1833       36.0667           96       161     2012      04        30        121              0.183542      23.349335       0.438477       0.215467       0.118000       0.028000   -9999.000000       0.766000
53857     53857     shaanxi        110.1833       36.0667           96       161     2012      05        01        122              0.189708      19.740753       2.956548       0.204337       0.184000   -9999.000000       0.059600       0.675000
53857     53857     shaanxi        110.1833       36.0667           96       161     2012      05        02        123              0.193958      17.200165       0.000000       0.237621       0.163000       0.114900       0.053800       0.631000
53857     53857     shaanxi        110.1833       36.0667           96       161     2012      05        03        124              0.189167      21.448608       0.097682       0.217568       0.148000   -9999.000000       0.051900   -9999.000000
53857     53857     shaanxi        110.1833       36.0667           96       161     2012      05        04        125              0.186458      21.523529       0.365986       0.197368       0.155000   -9999.000000       0.043700       0.392000
53857     53857     shaanxi        110.1833       36.0667           96       161     2012      05        05        126              0.183125      24.771149       0.000000       0.179847       0.141000   -9999.000000       0.042800       0.545000
53857     53857     shaanxi        110.1833       36.0667           96       161     2012      05        06        127              0.179917      26.158569       6.391216       0.171430       0.106000   -9999.000000   -9999.000000       0.370000
53857     53857     shaanxi        110.1833       36.0667           96       161     2012      05        07        128              0.195375      26.240326       0.764057       0.183262   -9999.000000       0.096200       0.056200       0.656000
53857     53857     shaanxi        110.1833       36.0667           96       161     2012      05        08        129              0.191167      22.428558       0.172080       0.246713       0.122000   -9999.000000       0.051200   -9999.000000
53857     53857     shaanxi        110.1833       36.0667           96       161     2012      05        09        130              0.183583      26.042969       0.578055       0.207583   -9999.000000   -9999.000000       0.050300       0.469000
53857     53857     shaanxi        110.1833       36.0667           96       161     2012      05        10        131              0.181792      23.179901       2.764142       0.197477   -9999.000000       0.096000       0.049500       0.502000
53857     53857     shaanxi        110.1833       36.0667           96       161     2012      05        11        132              0.207375      26.609924       6.076346       0.189049       0.246000   -9999.000000   -9999.000000       0.907000
53857     53857     shaanxi        110.1833       36.0667           96       161     2012      05        12        133              0.201417      18.508606       0.000000       0.273194       0.181500       0.050500       0.055600       0.376000
53857     53857     shaanxi        110.1833       36.0667           96       161     2012      05        13        134              0.194833      17.271790       0.218752       0.233395       0.185000   -9999.000000       0.053100   -9999.000000
53857     53857     shaanxi        110.1833       36.0667           96       161     2012      05        14        135              0.190333      17.885681       0.000000       0.213085       0.172000   -9999.000000       0.069000       0.463000
53857     53857     shaanxi        110.1833       36.0667           96       161     2012      05        15        136              0.186000      20.539032       0.000000       0.193237       0.191000       0.122600       0.065900       0.362000
53857     53857     shaanxi        110.1833       36.0667           96       161     2012      05        16        137              0.180833      22.101227       0.000000       0.179272       0.175000   -9999.000000       0.067100       0.382000
53857     53857     shaanxi        110.1833       36.0667           96       161     2012      05        17        138              0.177500      22.859344       0.000000       0.172583       0.159500   -9999.000000   -9999.000000       0.495000
53857     53857     shaanxi        110.1833       36.0667           96       161     2012      05        18        139              0.173792      25.136078       0.000000       0.169180       0.169000       0.091900       0.071100   -9999.000000
53857     53857     shaanxi        110.1833       36.0667           96       161     2012      05        19        140              0.171083      26.474762       0.000000       0.167424       0.152000   -9999.000000       0.071300       0.511000
53857     53857     shaanxi        110.1833       36.0667           96       161     2012      05        20        141              0.167208      28.435760       1.187766       0.165793   -9999.000000       0.028300       0.066200   -9999.000000
53857     53857     shaanxi        110.1833       36.0667           96       161     2012      05        21        142              0.170500      28.367249       8.442385       0.167620       0.375000   -9999.000000       0.094900       0.834000
53857     53857     shaanxi        110.1833       36.0667           96       161     2012      05        22        143              0.184333      17.724915       0.490426       0.262428       0.293000   -9999.000000       0.082900   -9999.000000
53857     53857     shaanxi        110.1833       36.0667           96       161     2012      05        23        144              0.179458      20.339661       0.632406       0.239908   -9999.000000       0.053800   -9999.000000   -9999.000000
53857     53857     shaanxi        110.1833       36.0667           96       161     2012      05        24        145              0.174042      20.643250       0.000000       0.218786       0.303000   -9999.000000       0.082600       0.424000
53857     53857     shaanxi        110.1833       36.0667           96       161     2012      05        25        146              0.000000      18.194275       0.000000       0.208601       0.298000       0.069000       0.084400   -9999.000000
53857     53857     shaanxi        110.1833       36.0667           96       161     2012      05        26        147              0.170125      22.735321       0.000000       0.189132       0.304000   -9999.000000       0.073000       0.461000
53857     53857     shaanxi        110.1833       36.0667           96       161     2012      05        27        148              0.166042      25.258698       0.000000       0.176335       0.273000   -9999.000000       0.073400   -9999.000000
53857     53857     shaanxi        110.1833       36.0667           96       161     2012      05        28        149              0.164500      26.709839      15.186812       0.170584   -9999.000000       0.048500   -9999.000000       0.238000
53857     53857     shaanxi        110.1833       36.0667           96       161     2012      05        29        150              0.185542      24.457672       0.000000       0.228283       0.261000   -9999.000000       0.087400       0.562000
53857     53857     shaanxi        110.1833       36.0667           96       161     2012      05        30        151              0.181250      22.889618       0.000000       0.265042   -9999.000000       0.049700       0.080600   -9999.000000
53857     53857     shaanxi        110.1833       36.0667           96       161     2012      05        31        152              0.175125      23.789825       0.000000       0.228526       0.306000       0.069400       0.074100   -9999.000000
53857     53857     shaanxi        110.1833       36.0667           96       161     2012      06        01        153              0.171708      23.288727       1.276533       0.210447       0.203000       0.057500       0.068400   -9999.000000
53857     53857     shaanxi        110.1833       36.0667           96       161     2012      06        02        154              0.168833      23.435577       0.000000       0.207136       0.182500   -9999.000000       0.077600       0.610000
53857     53857     shaanxi        110.1833       36.0667           96       161     2012      06        03        155              0.164750      25.418243       4.097528       0.192961       0.205000   -9999.000000   -9999.000000       0.577000
53857     53857     shaanxi        110.1833       36.0667           96       161     2012      06        04        156              0.161750      25.801361       0.178292       0.181122       0.185000       0.105600       0.089900       0.460000
53857     53857     shaanxi        110.1833       36.0667           96       161     2012      06        05        157              0.156708      27.073029       2.452773       0.174784   -9999.000000       0.052100       0.097500       0.591000
53857     53857     shaanxi        110.1833       36.0667           96       161     2012      06        06        158              0.154042      23.202637       0.000000       0.196648       0.237000   -9999.000000       0.089000   -9999.000000
53857     53857     shaanxi        110.1833       36.0667           96       161     2012      06        07        159              0.155917      20.859131       3.689963       0.198943       0.216500   -9999.000000       0.092400       0.276000
53857     53857     shaanxi        110.1833       36.0667           96       161     2012      06        08        160              0.157917      24.373718       0.000000       0.217426       0.209000   -9999.000000       0.083500       0.550000
53857     53857     shaanxi        110.1833       36.0667           96       161     2012      06        09        161              0.160917      23.591614       0.000000       0.206757       0.175000   -9999.000000   -9999.000000       0.620000
53857     53857     shaanxi        110.1833       36.0667           96       161     2012      06        10        162              0.155750      28.243591       0.000000       0.180670       0.202000       0.304600       0.086300       0.419000
53857     53857     shaanxi        110.1833       36.0667           96       161     2012      06        11        163              0.000000      25.587067       0.000000       0.170658       0.217000   -9999.000000       0.131700   -9999.000000
53857     53857     shaanxi        110.1833       36.0667           96       161     2012      06        12        164              0.150167      27.230377       0.000000       0.165978       0.182500       0.075400       0.122200       0.590000
53857     53857     shaanxi        110.1833       36.0667           96       161     2012      06        13        165              0.145667      29.058533       0.025151       0.163370       0.204500   -9999.000000       0.123900       0.528000
53857     53857     shaanxi        110.1833       36.0667           96       161     2012      06        14        166              0.140708      29.348450       0.000000       0.162213       0.173000   -9999.000000   -9999.000000       0.450000
53857     53857     shaanxi        110.1833       36.0667           96       161     2012      06        15        167              0.136708      27.193207       0.000000       0.161342       0.221000       0.022900       0.128900       0.459000
53857     53857     shaanxi        110.1833       36.0667           96       161     2012      06        16        168              0.133125      27.106964       0.000000       0.160247       0.209000   -9999.000000       0.131400   -9999.000000
53857     53857     shaanxi        110.1833       36.0667           96       161     2012      06        17        169              0.129625      28.931000       0.000000       0.159195       0.181000       0.037800       0.132000       0.591000
53857     53857     shaanxi        110.1833       36.0667           96       161     2012      06        18        170              0.126250      30.040222       2.589356       0.158762       0.178500   -9999.000000       0.111100   -9999.000000
53857     53857     shaanxi        110.1833       36.0667           96       161     2012      06        19        171              0.121375      30.205444       5.789933       0.158450       0.238000   -9999.000000       0.108200       0.814000
53857     53857     shaanxi        110.1833       36.0667           96       161     2012      06        20        172              0.121667      26.288452       0.000000       0.196316   -9999.000000       0.051800   -9999.000000   -9999.000000
53857     53857     shaanxi        110.1833       36.0667           96       161     2012      06        21        173              0.119875      27.537415       4.418591       0.199507       0.232000   -9999.000000       0.125200   -9999.000000
53857     53857     shaanxi        110.1833       36.0667           96       161     2012      06        22        174              0.126333      24.931488       2.195163       0.224264       0.198000   -9999.000000       0.120700       0.657000
53857     53857     shaanxi        110.1833       36.0667           96       161     2012      06        23        175              0.140458      27.523895      22.095366       0.218344       0.161000       0.169700       0.114100   -9999.000000
53857     53857     shaanxi        110.1833       36.0667           96       161     2012      06        24        176              0.201583      28.256256       0.531324       0.259190       0.244000   -9999.000000       0.123500       0.724000
53857     53857     shaanxi        110.1833       36.0667           96       161     2012      06        25        177              0.186958      25.441895       0.817599       0.322309   -9999.000000       0.258700   -9999.000000   -9999.000000
53857     53857     shaanxi        110.1833       36.0667           96       161     2012      06        26        178              0.178708      24.493347       0.168789       0.273726       0.266000   -9999.000000   -9999.000000       0.709000
53857     53857     shaanxi        110.1833       36.0667           96       161     2012      06        27        179              0.175583      22.270203       0.183365       0.257951       0.281000   -9999.000000       0.120600       0.701000
53857     53857     shaanxi        110.1833       36.0667           96       161     2012      06        28        180              0.173167      23.521362       5.757080       0.242414       0.246000       0.292500       0.143300       0.441000
53857     53857     shaanxi        110.1833       36.0667           96       161     2012      06        29        181              0.204042      23.355072       1.178749       0.248507       0.287000   -9999.000000       0.125200       0.994000
53857     53857     shaanxi        110.1833       36.0667           96       161     2012      06        30        182              0.196792      24.124817       0.000000       0.272259       0.211000       0.079100       0.119000   -9999.000000
53857     53857     shaanxi        110.1833       36.0667           96       161     2012      07        01        183              0.187583      27.259949       0.000000       0.233123       0.281000   -9999.000000   -9999.000000       0.607000
53857     53857     shaanxi        110.1833       36.0667           96       161     2012      07        02        184              0.180000      29.231781       0.000000       0.206392       0.276000   -9999.000000       0.128700       0.620000
53857     53857     shaanxi        110.1833       36.0667           96       161     2012      07        03        185              0.172750      29.961914       0.000000       0.189829       0.222000       0.029200       0.121800       0.510000
53857     53857     shaanxi        110.1833       36.0667           96       161     2012      07        04        186              0.163125      30.665558       0.480816       0.180643       0.267000   -9999.000000       0.131000       0.440000
53857     53857     shaanxi        110.1833       36.0667           96       161     2012      07        05        187              0.163250      25.956451       0.000000       0.183634       0.220000       0.035700       0.120800   -9999.000000
53857     53857     shaanxi        110.1833       36.0667           96       161     2012      07        06        188              0.157167      30.649200       0.917958       0.175482   -9999.000000   -9999.000000       0.119200       0.539000
53857     53857     shaanxi        110.1833       36.0667           96       161     2012      07        07        189              0.151542      29.627563       0.255967       0.171959   -9999.000000   -9999.000000   -9999.000000       0.623000
53857     53857     shaanxi        110.1833       36.0667           96       161     2012      07        08        190              0.244417      27.707428      41.769730       0.174250       0.340000   -9999.000000       0.150500       1.000000
53857     53857     shaanxi        110.1833       36.0667           96       161     2012      07        09        191              0.249750      23.093903       2.125568       0.348042       0.326000   -9999.000000       0.171700       0.999000
53857     53857     shaanxi        110.1833       36.0667           96       161     2012      07        10        192              0.232917      23.776459       0.193667       0.319815       0.250000   -9999.000000       0.159300   -9999.000000
53857     53857     shaanxi        110.1833       36.0667           96       161     2012      07        11        193              0.219792      27.831085       0.036038       0.291581       0.302000       0.103500       0.154600       0.893000
53857     53857     shaanxi        110.1833       36.0667           96       161     2012      07        12        194              0.211625      27.266479       0.000000       0.274798       0.279000   -9999.000000   -9999.000000       0.641000
53857     53857     shaanxi        110.1833       36.0667           96       161     2012      07        13        195              0.203458      28.294556       8.095364       0.251821   -9999.000000   -9999.000000       0.162000       0.925000
53857     53857     shaanxi        110.1833       36.0667           96       161     2012      07        14        196              0.205333      26.241180       0.522175       0.281910       0.319500   -9999.000000       0.158200       0.836000
53857     53857     shaanxi        110.1833       36.0667           96       161     2012      07        15        197              0.201625      25.796753       0.000000       0.277453       0.257000   -9999.000000       0.159100   -9999.000000
53857     53857     shaanxi        110.1833       36.0667           96       161     2012      07        16        198              0.197542      26.509308       0.000000       0.255506       0.269000       0.059400       0.166900       0.658000
53857     53857     shaanxi        110.1833       36.0667           96       161     2012      07        17        199              0.193167      26.812256       0.000000       0.238503       0.293000   -9999.000000       0.158600   -9999.000000
53857     53857     shaanxi        110.1833       36.0667           96       161     2012      07        18        200              0.188625      26.112915       0.000000       0.224221       0.298000       0.054400   -9999.000000       0.600000
53857     53857     shaanxi        110.1833       36.0667           96       161     2012      07        19        201              0.184250      27.319519       0.091561       0.209925       0.244500   -9999.000000       0.171900   -9999.000000
53857     53857     shaanxi        110.1833       36.0667           96       161     2012      07        20        202              0.180792      27.851379       5.986975       0.201174       0.297000   -9999.000000       0.173500   -9999.000000
53857     53857     shaanxi        110.1833       36.0667           96       161     2012      07        21        203              0.208792      27.919830      16.221865       0.242447   -9999.000000       0.072700       0.192700       1.000000
53857     53857     shaanxi        110.1833       36.0667           96       161     2012      07        22        204              0.214583      24.011017       7.440614       0.313673       0.226000   -9999.000000       0.167500   -9999.000000
53857     53857     shaanxi        110.1833       36.0667           96       161     2012      07        23        205              0.202625      25.975464       3.216696       0.280686       0.337000       0.073800       0.128800       0.745000
53857     53857     shaanxi        110.1833       36.0667           96       161     2012      07        24        206              0.230000      24.202484       5.686512       0.274665       0.305000   -9999.000000   -9999.000000   -9999.000000
53857     53857     shaanxi        110.1833       36.0667           96       161     2012      07        25        207              0.224375      25.135651       0.405594       0.306267       0.289000       0.192300       0.140200       0.929000
53857     53857     shaanxi        110.1833       36.0667           96       161     2012      07        26        208              0.221042      26.927490       6.942801       0.281629   -9999.000000       0.028800       0.144600       0.951000
53857     53857     shaanxi        110.1833       36.0667           96       161     2012      07        27        209              0.216708      27.382904       0.292390       0.297156       0.272000   -9999.000000       0.135900       0.823000
53857     53857     shaanxi        110.1833       36.0667           96       161     2012      07        28        210              0.207208      28.985687       0.081736       0.274697       0.300000       0.205800       0.117600       0.735000
53857     53857     shaanxi        110.1833       36.0667           96       161     2012      07        29        211              0.197417      30.353241       1.706441       0.251791       0.301000       0.044500   -9999.000000   -9999.000000
53857     53857     shaanxi        110.1833       36.0667           96       161     2012      07        30        212              0.243292      29.851349      24.414330       0.246895       0.253000   -9999.000000       0.130300       0.668000
53857     53857     shaanxi        110.1833       36.0667           96       161     2012      07        31        213              0.257042      26.419617       1.786487       0.346297       0.336000       0.252000       0.117300       0.904000
53857     53857     shaanxi        110.1833       36.0667           96       161     2012      08        01        214              0.244958      24.080109       0.524480       0.320079       0.288000   -9999.000000       0.118000       0.871000
53857     53857     shaanxi        110.1833       36.0667           96       161     2012      08        02        215              0.234167      25.272858       3.146139       0.304242   -9999.000000   -9999.000000       0.113900       0.727000
53857     53857     shaanxi        110.1833       36.0667           96       161     2012      08        03        216              0.225125      27.146454       0.076433       0.286933       0.314000       0.113900       0.104900   -9999.000000
53857     53857     shaanxi        110.1833       36.0667           96       161     2012      08        04        217              0.216625      27.775726       0.652571       0.272864       0.258000   -9999.000000   -9999.000000       0.776000
53857     53857     shaanxi        110.1833       36.0667           96       161     2012      08        05        218              0.210917      27.741150       2.248393       0.258203       0.293000       0.180700       0.113700       0.788000
53857     53857     shaanxi        110.1833       36.0667           96       161     2012      08        06        219              0.205542      26.772125       0.144850       0.263816       0.281000   -9999.000000       0.150100       0.534000
53857     53857     shaanxi        110.1833       36.0667           96       161     2012      08        07        220              0.204125      27.476196       0.321538       0.250704       0.233000   -9999.000000       0.140100       0.659000
53857     53857     shaanxi        110.1833       36.0667           96       161     2012      08        08        221              0.202125      29.436798       1.284747       0.231748       0.312000       0.021600       0.147200   -9999.000000
53857     53857     shaanxi        110.1833       36.0667           96       161     2012      08        09        222              0.199500      28.240845       0.278519       0.235055       0.292000   -9999.000000       0.139100       0.699000
53857     53857     shaanxi        110.1833       36.0667           96       161     2012      08        10        223              0.195833      27.138031       0.000000       0.224061       0.245500       0.127100   -9999.000000       0.576000
53857     53857     shaanxi        110.1833       36.0667           96       161     2012      08        11        224              0.192500      28.355591       4.128618       0.206095       0.247000   -9999.000000       0.154900       0.612000
53857     53857     shaanxi        110.1833       36.0667           96       161     2012      08        12        225              0.191167      29.962280       0.915837       0.215284       0.272000   -9999.000000       0.156600       0.707000
53857     53857     shaanxi        110.1833       36.0667           96       161     2012      08        13        226              0.207458      25.991882      32.681633       0.239663   -9999.000000   -9999.000000       0.122100   -9999.000000
53857     53857     shaanxi        110.1833       36.0667           96       161     2012      08        14        227              0.270000      23.643646      12.361578       0.290765       0.324000   -9999.000000       0.117500       0.902000
53857     53857     shaanxi        110.1833       36.0667           96       161     2012      08        15        228              0.246292      23.560181       0.113559       0.351039       0.268500   -9999.000000   -9999.000000   -9999.000000
53857     53857     shaanxi        110.1833       36.0667           96       161     2012      08        16        229              0.235667      25.370087       0.119298       0.314885       0.258000       0.205400       0.114900       0.727000
53857     53857     shaanxi        110.1833       36.0667           96       161     2012      08        17        230              0.261708      26.097839      32.315750       0.299768       0.283000   -9999.000000       0.120200   -9999.000000
53857     53857     shaanxi        110.1833       36.0667           96       161     2012      08        18        231              0.276875      24.529419      14.324184       0.354797   -9999.000000       0.144600       0.118900   -9999.000000
53857     53857     shaanxi        110.1833       36.0667           96       161     2012      08        19        232              0.260167      21.580597       0.243062       0.367101       0.332000   -9999.000000       0.122500       0.851000
53857     53857     shaanxi        110.1833       36.0667           96       161     2012      08        20        233              0.252875      22.929718       1.170140       0.339975       0.283000       0.194300       0.132600   -9999.000000
53857     53857     shaanxi        110.1833       36.0667           96       161     2012      08        21        234              0.244000      23.609406       0.000000       0.329250       0.252500       0.158000   -9999.000000       0.896000
53857     53857     shaanxi        110.1833       36.0667           96       161     2012      08        22        235              0.236708      21.262054       0.000000       0.315216       0.255000   -9999.000000       0.137400   -9999.000000
53857     53857     shaanxi        110.1833       36.0667           96       161     2012      08        23        236              0.230750      22.424072       0.000000       0.306350       0.247000       0.210800       0.136000       0.711000
53857     53857     shaanxi        110.1833       36.0667           96       161     2012      08        24        237              0.225458      21.839569       0.000000       0.297965   -9999.000000   -9999.000000       0.131000   -9999.000000
53857     53857     shaanxi        110.1833       36.0667           96       161     2012      08        25        238              0.000000      22.927338       0.834026       0.290677       0.300000       0.130700       0.131000   -9999.000000
53857     53857     shaanxi        110.1833       36.0667           96       161     2012      08        26        239              0.219708      23.262909       0.460242       0.288228       0.272000       0.072700   -9999.000000       0.683000
53857     53857     shaanxi        110.1833       36.0667           96       161     2012      08        27        240              0.215417      23.604950       0.449675       0.287009       0.264000   -9999.000000   -9999.000000   -9999.000000
53857     53857     shaanxi        110.1833       36.0667           96       161     2012      08        28        241              0.211625      24.109833       0.000000       0.281575       0.246000       0.047000       0.135200       0.597000
53857     53857     shaanxi        110.1833       36.0667           96       161     2012      08        29        242              0.207167      24.945465       0.000000       0.271433   -9999.000000   -9999.000000       0.141300       0.684000
53857     53857     shaanxi        110.1833       36.0667           96       161     2012      08        30        243              0.204708      25.404449       0.565252       0.260031       0.235000       0.168700       0.125000       0.547000
53857     53857     shaanxi        110.1833       36.0667           96       161     2012      08        31        244              0.219250      25.137177      13.576068       0.255633       0.313500       0.031500       0.146200       0.681000
53857     53857     shaanxi        110.1833       36.0667           96       161     2012      09        01        245              0.276375      21.445923      29.760342       0.311098       0.346000   -9999.000000   -9999.000000   -9999.000000
53857     53857     shaanxi        110.1833       36.0667           96       161     2012      09        02        246              0.254792      19.003845       0.000000       0.370432       0.304000       0.031800       0.151800       0.983000
53857     53857     shaanxi        110.1833       36.0667           96       161     2012      09        03        247              0.244500      20.073059       0.000000       0.334187       0.301000       0.232400       0.130100       0.722000
53857     53857     shaanxi        110.1833       36.0667           96       161     2012      09        04        248              0.237417      20.831390       0.000000       0.319613       0.335000       0.056500       0.131800       0.803000
53857     53857     shaanxi        110.1833       36.0667           96       161     2012      09        05        249              0.232542      22.040558       2.445264       0.310098       0.344000       0.115600       0.117700       0.729000
53857     53857     shaanxi        110.1833       36.0667           96       161     2012      09        06        250              0.234583      22.720184       4.002944       0.311150       0.350000   -9999.000000       0.126000   -9999.000000
53857     53857     shaanxi        110.1833       36.0667           96       161     2012      09        07        251              0.234625      19.537567       0.062343       0.323913       0.349500   -9999.000000   -9999.000000       0.771000
53857     53857     shaanxi        110.1833       36.0667           96       161     2012      09        08        252              0.230792      21.214081       0.000000       0.313272       0.313000       0.086200       0.127100       0.701000
53857     53857     shaanxi        110.1833       36.0667           96       161     2012      09        09        253              0.225750      22.587402       0.497954       0.305049       0.315000   -9999.000000       0.115800       0.606000
53857     53857     shaanxi        110.1833       36.0667           96       161     2012      09        10        254              0.252417      21.622620      14.877564       0.298491       0.374000       0.151500       0.133200       0.929000
53857     53857     shaanxi        110.1833       36.0667           96       161     2012      09        11        255              0.251583      18.581787       0.000000       0.342206       0.329000   -9999.000000       0.125600   -9999.000000
53857     53857     shaanxi        110.1833       36.0667           96       161     2012      09        12        256              0.239875      20.064697       0.000000       0.324529       0.292500       0.154200   -9999.000000       0.696000
53857     53857     shaanxi        110.1833       36.0667           96       161     2012      09        13        257              0.231833      16.462433       0.000000       0.313424       0.276000       0.034400       0.132300   -9999.000000
53857     53857     shaanxi        110.1833       36.0667           96       161     2012      09        14        258              0.225958      16.760101       0.000000       0.305911       0.284000   -9999.000000       0.120700       0.533000
53857     53857     shaanxi        110.1833       36.0667           96       161     2012      09        15        259              0.222042      18.047150       0.137463       0.299741       0.321000       0.045700       0.131000   -9999.000000
53857     53857     shaanxi        110.1833       36.0667           96       161     2012      09        16        260              0.220458      18.831451       0.000000       0.294976       0.334500   -9999.000000       0.115800   -9999.000000
53857     53857     shaanxi        110.1833       36.0667           96       161     2012      09        17        261              0.218917      17.758362       0.306318       0.294762       0.289000   -9999.000000       0.128400       0.649000
53857     53857     shaanxi        110.1833       36.0667           96       161     2012      09        18        262              0.216667      18.083344       0.000000       0.294276       0.294000       0.053700   -9999.000000   -9999.000000
53857     53857     shaanxi        110.1833       36.0667           96       161     2012      09        19        263              0.213583      19.052277       0.141184       0.288896       0.262000   -9999.000000       0.131300       0.524000
53857     53857     shaanxi        110.1833       36.0667           96       161     2012      09        20        264              0.216458      19.848480       5.091402       0.283038       0.368000       0.012100       0.142100   -9999.000000
53857     53857     shaanxi        110.1833       36.0667           96       161     2012      09        21        265              0.226708      18.189941       0.348985       0.302391   -9999.000000       0.126900       0.140300       0.831000
53857     53857     shaanxi        110.1833       36.0667           96       161     2012      09        22        266              0.221833      19.057983       0.115267       0.301784       0.220000       0.341200       0.131400       0.694000
53857     53857     shaanxi        110.1833       36.0667           96       161     2012      09        23        267              0.217583      18.663940       0.000000       0.293760       0.231500       0.142100       0.126800       0.584000
53857     53857     shaanxi        110.1833       36.0667           96       161     2012      09        24        268              0.214958      19.727142       0.000000       0.286868       0.230000   -9999.000000   -9999.000000       0.588000
53857     53857     shaanxi        110.1833       36.0667           96       161     2012      09        25        269              0.231500      19.587555      10.530257       0.283920   -9999.000000       0.151700       0.151900   -9999.000000
53857     53857     shaanxi        110.1833       36.0667           96       161     2012      09        26        270              0.237125      16.280518       0.000000       0.324532       0.255000       0.138200       0.154000       0.846000
53857     53857     shaanxi        110.1833       36.0667           96       161     2012      09        27        271              0.231143      16.688599       0.000000       0.311216       0.246500   -9999.000000       0.140000       0.640000
53857     53857     shaanxi        110.1833       36.0667           96       161     2012      09        28        272              0.219133      16.388489       0.000000       0.298987       0.231000   -9999.000000       0.147000       0.591000
53857     53857     shaanxi        110.1833       36.0667           96       161     2012      09        29        273              0.215667      14.140869       0.000000       0.292506       0.251000   -9999.000000   -9999.000000       0.526000
53857     53857     shaanxi        110.1833       36.0667           96       161     2012      09        30        274              0.211375      14.900116       0.000000       0.287802       0.224000       0.149000       0.149800   -9999.000000
53857     53857     shaanxi        110.1833       36.0667           96       161     2012      10        01        275              0.208208      15.349609       0.000000       0.283134       0.213000   -9999.000000       0.114900       0.451000
53857     53857     shaanxi        110.1833       36.0667           96       161     2012      10        02        276              0.206500      16.092163       0.000000       0.280252       0.227000   -9999.000000       0.121400       0.599000
53857     53857     shaanxi        110.1833       36.0667           96       161     2012      10        03        277              0.203958      17.719238       0.000000       0.278069       0.187500       0.017200       0.112400       0.509000
53857     53857     shaanxi        110.1833       36.0667           96       161     2012      10        04        278              0.201833      18.134918       0.293751       0.272699       0.238500   -9999.000000       0.119400       0.638000
53857     53857     shaanxi        110.1833       36.0667           96       161     2012      10        05        279              0.200208      15.598846       0.000000       0.276079       0.203000       0.118100   -9999.000000   -9999.000000
53857     53857     shaanxi        110.1833       36.0667           96       161     2012      10        06        280              0.197875      15.049927       0.000000       0.273825       0.224000       0.061200       0.118500       0.532000
53857     53857     shaanxi        110.1833       36.0667           96       161     2012      10        07        281              0.197792      16.466400       0.000000       0.269483       0.230000   -9999.000000       0.125700       0.555000
53857     53857     shaanxi        110.1833       36.0667           96       161     2012      10        08        282              0.197042      14.660461       0.253125       0.272220       0.222000       0.017300       0.102100       0.599000
53857     53857     shaanxi        110.1833       36.0667           96       161     2012      10        09        283              0.193208      15.204041       0.000000       0.271771       0.196000       0.095700       0.108800       0.453000
53857     53857     shaanxi        110.1833       36.0667           96       161     2012      10        10        284              0.189542      14.415436       0.000000       0.265126       0.217000   -9999.000000       0.100300   -9999.000000
53857     53857     shaanxi        110.1833       36.0667           96       161     2012      10        11        285              0.188375      15.114960       0.000000       0.260731       0.150000       0.086500   -9999.000000       0.590000
53857     53857     shaanxi        110.1833       36.0667           96       161     2012      10        12        286              0.186333      16.519196       0.000000       0.259281       0.143000   -9999.000000       0.102800   -9999.000000
53857     53857     shaanxi        110.1833       36.0667           96       161     2012      10        13        287              0.182375      15.947784       0.000000       0.255858       0.145000       0.140600       0.106700       0.499000
53857     53857     shaanxi        110.1833       36.0667           96       161     2012      10        14        288              0.181083      15.615997       0.015921       0.251140       0.144500       0.099900       0.101700   -9999.000000
53857     53857     shaanxi        110.1833       36.0667           96       161     2012      10        15        289              0.181500      14.971100       1.244137       0.251390       0.168000   -9999.000000       0.101200   -9999.000000
53857     53857     shaanxi        110.1833       36.0667           96       161     2012      10        16        290              0.184958      13.603333       1.034305       0.259729       0.160000       0.169600   -9999.000000       0.548000
53857     53857     shaanxi        110.1833       36.0667           96       161     2012      10        17        291              0.183833      10.741608       0.000000       0.268399       0.158000   -9999.000000       0.110600   -9999.000000
53857     53857     shaanxi        110.1833       36.0667           96       161     2012      10        18        292              0.183875      10.908447       0.065442       0.258042       0.171000       0.301900       0.103400       0.532000
53857     53857     shaanxi        110.1833       36.0667           96       161     2012      10        19        293              0.182667      12.601532       0.345833       0.256522       0.151500       0.212500       0.103200   -9999.000000
53857     53857     shaanxi        110.1833       36.0667           96       161     2012      10        20        294              0.180875      13.978607       0.000000       0.252829       0.157000   -9999.000000       0.102400       0.414000
53857     53857     shaanxi        110.1833       36.0667           96       161     2012      10        21        295              0.183167      15.571442       1.758851       0.249234   -9999.000000       0.022900       0.109500       0.712000
53857     53857     shaanxi        110.1833       36.0667           96       161     2012      10        22        296              0.188292       8.871429       0.044403       0.266532   -9999.000000   -9999.000000   -9999.000000       0.742000
53857     53857     shaanxi        110.1833       36.0667           96       161     2012      10        23        297              0.188208       9.447266       0.000000       0.260107   -9999.000000   -9999.000000       0.088900       0.566000
53857     53857     shaanxi        110.1833       36.0667           96       161     2012      10        24        298              0.187083       8.479279       0.000000       0.258927   -9999.000000       0.071800       0.090300   -9999.000000
53857     53857     shaanxi        110.1833       36.0667           96       161     2012      10        25        299              0.000000      10.601288       0.000000       0.255105       0.160500   -9999.000000       0.082300       0.431000
53857     53857     shaanxi        110.1833       36.0667           96       161     2012      10        26        300              0.183958      11.345734       0.944057       0.252815       0.181000       0.092200       0.089500       0.523000
53857     53857     shaanxi        110.1833       36.0667           96       161     2012      10        27        301              0.181208      10.430847       0.000000       0.253626       0.173000       0.029000   -9999.000000       0.470000
53857     53857     shaanxi        110.1833       36.0667           96       161     2012      10        28        302              0.000000      11.993927       0.216463       0.249429       0.169000       0.138600   -9999.000000       0.457000
53857     53857     shaanxi        110.1833       36.0667           96       161     2012      10        29        303              0.177833      11.486694       0.000000       0.249757       0.165000       0.210500       0.075500   -9999.000000
53857     53857     shaanxi        110.1833       36.0667           96       161     2012      10        30        304              0.172958      10.328461       0.000000       0.247451       0.164500   -9999.000000       0.084700       0.321000
53857     53857     shaanxi        110.1833       36.0667           96       161     2012      10        31        305              0.170792       8.356537       0.000000       0.243383       0.179000   -9999.000000       0.077900       0.477000
53857     53857     shaanxi        110.1833       36.0667           96       161     2012      11        01        306              0.169458       8.406097       0.000000       0.240708       0.150000       0.055400       0.083300       0.406000
53857     53857     shaanxi        110.1833       36.0667           96       161     2012      11        02        307              0.169750       8.942749       2.244200       0.240105   -9999.000000   -9999.000000   -9999.000000       0.511000
53857     53857     shaanxi        110.1833       36.0667           96       161     2012      11        03        308              0.181708      11.126129       0.224108       0.244586   -9999.000000   -9999.000000       0.083700   -9999.000000
53857     53857     shaanxi        110.1833       36.0667           96       161     2012      11        04        309              0.181083       4.207336       0.217086       0.247338       0.156000   -9999.000000       0.083900       0.367000
53857     53857     shaanxi        110.1833       36.0667           96       161     2012      11        05        310              0.177042       2.680969       0.210445       0.228988       0.142000   -9999.000000       0.070600       0.378000
53857     53857     shaanxi        110.1833       36.0667           96       161     2012      11        06        311              0.175208       3.014160       0.167795       0.226888       0.161000       0.043100       0.074000       0.500000
53857     53857     shaanxi        110.1833       36.0667           96       161     2012      11        07        312              0.179542       5.562256       0.000000       0.245175       0.163000   -9999.000000       0.077500       0.496000
53857     53857     shaanxi        110.1833       36.0667           96       161     2012      11        08        313              0.178917       4.790588       0.000000       0.245608       0.148000   -9999.000000   -9999.000000   -9999.000000
53857     53857     shaanxi        110.1833       36.0667           96       161     2012      11        09        314              0.179958       6.705231       0.322670       0.246787       0.163000   -9999.000000       0.072700       0.554000
53857     53857     shaanxi        110.1833       36.0667           96       161     2012      11        10        315              0.185083       5.040436       0.184998       0.252228       0.153000       0.089600       0.063700   -9999.000000
53857     53857     shaanxi        110.1833       36.0667           96       161     2012      11        11        316              0.181500       2.657227       0.000000       0.233268       0.163000       0.045300       0.072800       0.289000
53857     53857     shaanxi        110.1833       36.0667           96       161     2012      11        12        317              0.178708       2.544495       0.000000       0.223070       0.153000   -9999.000000       0.062200   -9999.000000
53857     53857     shaanxi        110.1833       36.0667           96       161     2012      11        13        318              0.000000       4.240967       0.000000       0.238135   -9999.000000       0.175200   -9999.000000   -9999.000000
53857     53857     shaanxi        110.1833       36.0667           96       161     2012      11        14        319              0.178708       4.152649       0.000000       0.231036       0.153000       0.030600       0.064000       0.439000
53857     53857     shaanxi        110.1833       36.0667           96       161     2012      11        15        320              0.190458       5.053253       0.206051       0.240296   -9999.000000       0.295600       0.051900   -9999.000000
53857     53857     shaanxi        110.1833       36.0667           96       161     2012      11        16        321              0.200083       2.994843       0.334256       0.243800       0.161000       0.057100       0.057000       0.373000
53857     53857     shaanxi        110.1833       36.0667           96       161     2012      11        17        322              0.000000       3.804077       0.101024       0.237475       0.161000   -9999.000000       0.062800   -9999.000000
53857     53857     shaanxi        110.1833       36.0667           96       161     2012      11        18        323              0.196708       5.019745       0.000000       0.241881   -9999.000000   -9999.000000       0.065500       0.576000
53857     53857     shaanxi        110.1833       36.0667           96       161     2012      11        19        324              0.194542       4.962524       0.000000       0.237293       0.150000       0.131700   -9999.000000       0.614000
53857     53857     shaanxi        110.1833       36.0667           96       161     2012      11        20        325              0.196167       5.094330       0.000000       0.242431       0.149000   -9999.000000       0.053700       0.501000
53857     53857     shaanxi        110.1833       36.0667           96       161     2012      11        21        326              0.195000       4.668610       0.000000       0.246241       0.130000       0.157300       0.055000       0.434000
53857     53857     shaanxi        110.1833       36.0667           96       161     2012      11        22        327              0.192500       5.771027       0.000000       0.246582       0.132000   -9999.000000       0.052500   -9999.000000
53857     53857     shaanxi        110.1833       36.0667           96       161     2012      11        23        328              0.188583       2.927551       0.000000       0.232723       0.128000       0.122500       0.050800       0.316000
53857     53857     shaanxi        110.1833       36.0667           96       161     2012      11        24        329              0.182667       2.003662       0.052029       0.215801       0.131000       0.140800       0.054600       0.439000
53857     53857     shaanxi        110.1833       36.0667           96       161     2012      11        25        330              0.185167       2.608704       0.000000       0.230396   -9999.000000   -9999.000000   -9999.000000       0.324000
53857     53857     shaanxi        110.1833       36.0667           96       161     2012      11        26        331              0.174542       1.780609       1.624446       0.217014       0.112000       0.040900   -9999.000000       0.220000
53857     53857     shaanxi        110.1833       36.0667           96       161     2012      11        27        332              0.155208       1.106934       0.000000       0.206952       0.138000   -9999.000000       0.040700   -9999.000000
53857     53857     shaanxi        110.1833       36.0667           96       161     2012      11        28        333              0.135667       2.532562       0.000000       0.216918       0.125000       0.114600       0.041600       0.176000
53857     53857     shaanxi        110.1833       36.0667           96       161     2012      11        29        334              0.115708      -0.679932       0.000000       0.198087   -9999.000000       0.036100       0.043600       0.194000
53857     53857     shaanxi        110.1833       36.0667           96       161     2012      11        30        335              0.113958      -0.615967       0.152350       0.195270   -9999.000000   -9999.000000   -9999.000000       0.173000
53857     53857     shaanxi        110.1833       36.0667           96       161     2012      12        01        336              0.127792       0.974731       0.304017       0.207566       0.125000       0.037200       0.046000       0.133000
53857     53857     shaanxi        110.1833       36.0667           96       161     2012      12        02        337              0.134167      -0.055176       2.304978       0.203167       0.122000   -9999.000000       0.041700   -9999.000000
53857     53857     shaanxi        110.1833       36.0667           96       161     2012      12        03        338              0.120625       0.625458       0.000000       0.209789       0.126000       0.041700       0.043700       0.034000
53857     53857     shaanxi        110.1833       36.0667           96       161     2012      12        04        339              0.115667       0.250580       0.000000       0.201701       0.134000       0.024400       0.039600       0.328000
53857     53857     shaanxi        110.1833       36.0667           96       161     2012      12        05        340              0.118167       1.752136       0.000000       0.213021   -9999.000000   -9999.000000       0.039500       0.097000
53857     53857     shaanxi        110.1833       36.0667           96       161     2012      12        06        341              0.130083      -0.374664       0.000000       0.196589   -9999.000000       0.115000   -9999.000000       0.221000
53857     53857     shaanxi        110.1833       36.0667           96       161     2012      12        07        342              0.136417       1.291351       0.000000       0.209299       0.112000       0.019400       0.038700   -9999.000000
53857     53857     shaanxi        110.1833       36.0667           96       161     2012      12        08        343              0.118000       0.294830       0.000000       0.201102       0.126000       0.033100       0.040400       0.030000
53857     53857     shaanxi        110.1833       36.0667           96       161     2012      12        09        344              0.111333      -2.712921       0.000000       0.182210       0.125000       0.039400       0.039100   -9999.000000
53857     53857     shaanxi        110.1833       36.0667           96       161     2012      12        10        345              0.113292      -1.819336       0.000000       0.185378   -9999.000000   -9999.000000       0.040100       0.022000
53857     53857     shaanxi        110.1833       36.0667           96       161     2012      12        11        346              0.107083      -0.623230       0.000000       0.192290   -9999.000000   -9999.000000       0.038900   -9999.000000
53857     53857     shaanxi        110.1833       36.0667           96       161     2012      12        12        347              0.108167      -1.167114       0.000000       0.189610       0.114500       0.019200   -9999.000000   -9999.000000
53857     53857     shaanxi        110.1833       36.0667           96       161     2012      12        13        348              0.113792      -0.549255       0.000000       0.192048       0.124000   -9999.000000       0.037900       0.013000
53857     53857     shaanxi        110.1833       36.0667           96       161     2012      12        14        349              0.119292      -1.022766       0.000000       0.191474   -9999.000000       0.028800       0.043400   -9999.000000
53857     53857     shaanxi        110.1833       36.0667           96       161     2012      12        15        350              0.000000      -0.803619       0.000000       0.193947   -9999.000000   -9999.000000       0.043600       0.126000
53857     53857     shaanxi        110.1833       36.0667           96       161     2012      12        16        351              0.126583      -1.485779       0.000000       0.184165       0.121000       0.031200       0.043300   -9999.000000
53857     53857     shaanxi        110.1833       36.0667           96       161     2012      12        17        352              0.127875      -0.347229       0.000000       0.198732   -9999.000000       0.038100   -9999.000000       0.176000
53857     53857     shaanxi        110.1833       36.0667           96       161     2012      12        18        353              0.115708      -1.309631       0.000000       0.192689       0.109000       0.010100       0.042000       0.010000
53857     53857     shaanxi        110.1833       36.0667           96       161     2012      12        19        354              0.110042      -1.531525       0.000000       0.187876   -9999.000000       0.049900       0.040300       0.005000
53857     53857     shaanxi        110.1833       36.0667           96       161     2012      12        20        355              0.000000      -1.669586       0.689702       0.184237   -9999.000000   -9999.000000       0.042400       0.025000
53857     53857     shaanxi        110.1833       36.0667           96       161     2012      12        21        356              0.104458      -2.907898       0.000000       0.174891   -9999.000000       0.112100       0.039500   -9999.000000
53857     53857     shaanxi        110.1833       36.0667           96       161     2012      12        22        357              0.095750      -3.787170       0.000000       0.173981   -9999.000000       0.028500       0.037800       0.018000
53857     53857     shaanxi        110.1833       36.0667           96       161     2012      12        23        358              0.087917      -6.717102       0.000000       0.156980   -9999.000000   -9999.000000   -9999.000000   -9999.000000
53857     53857     shaanxi        110.1833       36.0667           96       161     2012      12        24        359              0.087158      -8.873016       0.108332       0.146764   -9999.000000   -9999.000000       0.035100       0.003000
53857     53857     shaanxi        110.1833       36.0667           96       161     2012      12        25        360              0.088167      -5.685181       0.000000       0.162435   -9999.000000   -9999.000000       0.036500       0.002000
53857     53857     shaanxi        110.1833       36.0667           96       161     2012      12        26        361              0.000000      -5.668213       0.000000       0.159709   -9999.000000       0.155500       0.035000   -9999.000000
53857     53857     shaanxi        110.1833       36.0667           96       161     2012      12        27        362              0.090667      -4.324829       0.000000       0.165160   -9999.000000       0.016000       0.037400       0.035000
53857     53857     shaanxi        110.1833       36.0667           96       161     2012      12        28        363              0.000000      -3.817230       0.000000       0.172055   -9999.000000   -9999.000000   -9999.000000   -9999.000000
53857     53857     shaanxi        110.1833       36.0667           96       161     2012      12        29        364              0.000000      -4.306152       0.000000       0.167142   -9999.000000       0.181400       0.035100   -9999.000000
53857     53857     shaanxi        110.1833       36.0667           96       161     2012      12        30        365              0.000000      -8.116608       0.000000       0.151358   -9999.000000   -9999.000000       0.031400   -9999.000000
53857     53857     shaanxi        110.1833       36.0667           96       161     2012      12        31        366              0.086200      -6.115967       0.134884       0.160763   -9999.000000       0.182900       0.034200   -9999.000000
