# Supplementary material for: Research on Fusing Multisatellite Soil Moisture Data Based on Bayesian Model Averaging
Source: Hindawi journal article supplement (doi:10.1155/2018/9310838), 2018-06-25
Supplement: f1 [file 9310838.f1.zip › 2012_sm00-10cm_daily_ZDB_ZHY_53859_366days_allin.txt]

53859     53859     shanxi         110.6667       36.1000           96       163     2012      01        01        001              0.000000   -9999.000000       0.000000   -9999.000000       0.088000   -9999.000000       0.041400   -9999.000000
53859     53859     shanxi         110.6667       36.1000           96       163     2012      01        02        002              0.089292      -2.464661       0.000000       0.165286       0.093000   -9999.000000       0.042500       0.026000
53859     53859     shanxi         110.6667       36.1000           96       163     2012      01        03        003              0.000000      -3.492218       0.000000       0.157131   -9999.000000       0.007500   -9999.000000   -9999.000000
53859     53859     shanxi         110.6667       36.1000           96       163     2012      01        04        004              0.083250      -6.314026       0.077828       0.138666   -9999.000000       0.155700       0.036400   -9999.000000
53859     53859     shanxi         110.6667       36.1000           96       163     2012      01        05        005              0.083792      -6.419495       0.000000       0.140175   -9999.000000   -9999.000000       0.045500       0.013000
53859     53859     shanxi         110.6667       36.1000           96       163     2012      01        06        006              0.085667      -4.712128       0.000000       0.148332       0.084000   -9999.000000       0.040400   -9999.000000
53859     53859     shanxi         110.6667       36.1000           96       163     2012      01        07        007              0.088708      -2.533112       0.000000       0.165827       0.100000   -9999.000000       0.041400       0.050000
53859     53859     shanxi         110.6667       36.1000           96       163     2012      01        08        008              0.000000      -2.343567       0.000000       0.164749       0.095000   -9999.000000   -9999.000000   -9999.000000
53859     53859     shanxi         110.6667       36.1000           96       163     2012      01        09        009              0.087792      -2.280701       0.000000       0.169327   -9999.000000       0.272000   -9999.000000   -9999.000000
53859     53859     shanxi         110.6667       36.1000           96       163     2012      01        10        010              0.086292      -2.017273       0.000000       0.171340   -9999.000000   -9999.000000       0.039100       0.008000
53859     53859     shanxi         110.6667       36.1000           96       163     2012      01        11        011              0.085625      -2.595428       0.000000       0.166639       0.090000   -9999.000000       0.035700       0.039000
53859     53859     shanxi         110.6667       36.1000           96       163     2012      01        12        012              0.086125      -2.563324       0.247542       0.166310       0.101000       0.102800       0.036900       0.003000
53859     53859     shanxi         110.6667       36.1000           96       163     2012      01        13        013              0.086208      -2.182190       0.000000       0.170598       0.093000   -9999.000000       0.036500   -9999.000000
53859     53859     shanxi         110.6667       36.1000           96       163     2012      01        14        014              0.085708      -1.946320       0.000000       0.171189   -9999.000000   -9999.000000   -9999.000000       0.019000
53859     53859     shanxi         110.6667       36.1000           96       163     2012      01        15        015              0.086667      -2.781586       0.000000       0.165138   -9999.000000   -9999.000000       0.042800       0.022000
53859     53859     shanxi         110.6667       36.1000           96       163     2012      01        16        016              0.088417      -1.462067       0.000000       0.174555       0.090000   -9999.000000       0.034400       0.131000
53859     53859     shanxi         110.6667       36.1000           96       163     2012      01        17        017              0.000000      -1.539703       0.000000       0.173508       0.084000   -9999.000000       0.034600       0.006000
53859     53859     shanxi         110.6667       36.1000           96       163     2012      01        18        018              0.089875      -0.908478       0.000000       0.179588       0.094000   -9999.000000       0.033000   -9999.000000
53859     53859     shanxi         110.6667       36.1000           96       163     2012      01        19        019              0.091083      -0.630157       0.000000       0.183225       0.098000   -9999.000000   -9999.000000       0.032000
53859     53859     shanxi         110.6667       36.1000           96       163     2012      01        20        020              0.092333      -0.716064       0.570518       0.180144   -9999.000000       0.046100   -9999.000000       0.037000
53859     53859     shanxi         110.6667       36.1000           96       163     2012      01        21        021              0.090458      -2.213409       0.000000       0.166866   -9999.000000   -9999.000000       0.030400       0.016000
53859     53859     shanxi         110.6667       36.1000           96       163     2012      01        22        022              0.087292      -5.805084       0.000000       0.144826   -9999.000000   -9999.000000       0.031300   -9999.000000
53859     53859     shanxi         110.6667       36.1000           96       163     2012      01        23        023              0.085500      -7.860138       0.000000       0.133984   -9999.000000   -9999.000000       0.027200   -9999.000000
53859     53859     shanxi         110.6667       36.1000           96       163     2012      01        24        024              0.000000      -8.235504       0.000000       0.130802   -9999.000000   -9999.000000   -9999.000000       0.072000
53859     53859     shanxi         110.6667       36.1000           96       163     2012      01        25        025              0.000000      -8.188751       0.000000       0.130616   -9999.000000       0.012300   -9999.000000   -9999.000000
53859     53859     shanxi         110.6667       36.1000           96       163     2012      01        26        026              0.000000      -5.686676       0.000000       0.143908   -9999.000000   -9999.000000       0.031300       0.039000
53859     53859     shanxi         110.6667       36.1000           96       163     2012      01        27        027              0.000000      -3.310059       0.000000       0.161350       0.091000   -9999.000000       0.030600       0.056000
53859     53859     shanxi         110.6667       36.1000           96       163     2012      01        28        028              0.000000      -2.382568       0.000000       0.166816       0.110000       0.066200       0.032300   -9999.000000
53859     53859     shanxi         110.6667       36.1000           96       163     2012      01        29        029              0.000000      -1.472260       0.000000       0.175340       0.097000   -9999.000000       0.032000       0.040000
53859     53859     shanxi         110.6667       36.1000           96       163     2012      01        30        030              0.000000      -0.922241       0.000000       0.180873   -9999.000000   -9999.000000       0.036700   -9999.000000
53859     53859     shanxi         110.6667       36.1000           96       163     2012      01        31        031              0.000000       0.006348       0.000000       0.187040   -9999.000000       0.059000   -9999.000000       0.162000
53859     53859     shanxi         110.6667       36.1000           96       163     2012      02        01        032              0.000000       1.545807       0.000000       0.200115   -9999.000000       0.361200       0.036600   -9999.000000
53859     53859     shanxi         110.6667       36.1000           96       163     2012      02        02        033              0.000000      -3.065430       0.000000       0.165752       0.088000       0.064200       0.035900       0.066000
53859     53859     shanxi         110.6667       36.1000           96       163     2012      02        03        034              0.000000      -3.355225       0.000000       0.162596       0.093000   -9999.000000       0.033000       0.047000
53859     53859     shanxi         110.6667       36.1000           96       163     2012      02        04        035              0.000000      -0.954742       0.000000       0.177024       0.100000   -9999.000000       0.036300   -9999.000000
53859     53859     shanxi         110.6667       36.1000           96       163     2012      02        05        036              0.000000      -0.843262       0.000000       0.179878   -9999.000000       0.019100   -9999.000000       0.102000
53859     53859     shanxi         110.6667       36.1000           96       163     2012      02        06        037              0.000000       0.522003       0.000000       0.190996   -9999.000000   -9999.000000       0.034300   -9999.000000
53859     53859     shanxi         110.6667       36.1000           96       163     2012      02        07        038              0.000000      -4.041107       0.000000       0.161609       0.029000   -9999.000000       0.036200   -9999.000000
53859     53859     shanxi         110.6667       36.1000           96       163     2012      02        08        039              0.000000      -5.830444       0.000000       0.142956   -9999.000000   -9999.000000       0.035400       0.006000
53859     53859     shanxi         110.6667       36.1000           96       163     2012      02        09        040              0.000000      -7.390411       0.000000       0.133995   -9999.000000       0.151600       0.034100       0.009000
53859     53859     shanxi         110.6667       36.1000           96       163     2012      02        10        041              0.000000      -5.315460       0.000000       0.141137   -9999.000000   -9999.000000       0.035400       0.009000
53859     53859     shanxi         110.6667       36.1000           96       163     2012      02        11        042              0.000000      -2.739594       0.000000       0.166363   -9999.000000   -9999.000000   -9999.000000   -9999.000000
53859     53859     shanxi         110.6667       36.1000           96       163     2012      02        12        043              0.000000       0.047211       0.257367       0.183388   -9999.000000   -9999.000000   -9999.000000       0.024000
53859     53859     shanxi         110.6667       36.1000           96       163     2012      02        13        044              0.000000      -0.789764       0.666715       0.180769   -9999.000000   -9999.000000   -9999.000000       0.149000
53859     53859     shanxi         110.6667       36.1000           96       163     2012      02        14        045              0.000000      -0.537445       0.000000       0.183916       0.079000   -9999.000000       0.041700       0.296000
53859     53859     shanxi         110.6667       36.1000           96       163     2012      02        15        046              0.000000       0.088989       0.000000       0.187461   -9999.000000   -9999.000000       0.042500       0.014000
53859     53859     shanxi         110.6667       36.1000           96       163     2012      02        16        047              0.000000       0.053864       0.000000       0.188479   -9999.000000   -9999.000000       0.037700   -9999.000000
53859     53859     shanxi         110.6667       36.1000           96       163     2012      02        17        048              0.000000      -1.587372       0.000000       0.176512       0.075000       0.341700   -9999.000000       0.053000
53859     53859     shanxi         110.6667       36.1000           96       163     2012      02        18        049              0.000000      -3.100647       0.000000       0.164807       0.089000       0.052500       0.037200       0.006000
53859     53859     shanxi         110.6667       36.1000           96       163     2012      02        19        050              0.000000      -2.279510       0.000000       0.169464       0.084000   -9999.000000       0.036600       0.221000
53859     53859     shanxi         110.6667       36.1000           96       163     2012      02        20        051              0.000000       0.928864       0.000000       0.186695   -9999.000000       0.047500       0.034600       0.111000
53859     53859     shanxi         110.6667       36.1000           96       163     2012      02        21        052              0.000000       2.063385       0.000000       0.198188   -9999.000000   -9999.000000   -9999.000000   -9999.000000
53859     53859     shanxi         110.6667       36.1000           96       163     2012      02        22        053              0.000000       3.182434       0.000000       0.204572       0.073000   -9999.000000   -9999.000000       0.191000
53859     53859     shanxi         110.6667       36.1000           96       163     2012      02        23        054              0.000000       3.377075       0.000000       0.210011       0.073000   -9999.000000       0.034300   -9999.000000
53859     53859     shanxi         110.6667       36.1000           96       163     2012      02        24        055              0.000000       2.264832       0.000000       0.203177       0.091000   -9999.000000       0.035200       0.231000
53859     53859     shanxi         110.6667       36.1000           96       163     2012      02        25        056              0.000000       1.960815       0.000000       0.201173   -9999.000000       0.078100       0.038100       0.043000
53859     53859     shanxi         110.6667       36.1000           96       163     2012      02        26        057              0.000000      -0.006012       0.000000       0.187231   -9999.000000       0.045800       0.039500   -9999.000000
53859     53859     shanxi         110.6667       36.1000           96       163     2012      02        27        058              0.000000       1.367157       0.000000       0.195055   -9999.000000       0.282700   -9999.000000       0.026000
53859     53859     shanxi         110.6667       36.1000           96       163     2012      02        28        059              0.000000       2.201019       0.000000       0.199342       0.076000       0.101800   -9999.000000   -9999.000000
53859     53859     shanxi         110.6667       36.1000           96       163     2012      02        29        060              0.000000   -9999.000000       0.000000   -9999.000000       0.087000   -9999.000000   -9999.000000   -9999.000000
53859     53859     shanxi         110.6667       36.1000           96       163     2012      03        01        061              0.000000       2.478699       0.000000       0.203527       0.100000       0.041100       0.036000   -9999.000000
53859     53859     shanxi         110.6667       36.1000           96       163     2012      03        02        062              0.000000       1.642639       0.000000       0.203588   -9999.000000   -9999.000000       0.038000       0.545000
53859     53859     shanxi         110.6667       36.1000           96       163     2012      03        03        063              0.000000       1.734985       0.000000       0.204052   -9999.000000       0.340100       0.037800       0.286000
53859     53859     shanxi         110.6667       36.1000           96       163     2012      03        04        064              0.000000       1.593292       0.000000       0.201149       0.087500       0.120200       0.036100   -9999.000000
53859     53859     shanxi         110.6667       36.1000           96       163     2012      03        05        065              0.000000       1.873901       0.000000       0.200950       0.098000   -9999.000000   -9999.000000       0.266000
53859     53859     shanxi         110.6667       36.1000           96       163     2012      03        06        066              0.000000       2.767883       0.000000       0.203777       0.096000   -9999.000000       0.032700   -9999.000000
53859     53859     shanxi         110.6667       36.1000           96       163     2012      03        07        067              0.000000       1.426514       0.000000       0.193685   -9999.000000       0.021700       0.041200       0.380000
53859     53859     shanxi         110.6667       36.1000           96       163     2012      03        08        068              0.093167       3.890259       0.000000       0.205615   -9999.000000   -9999.000000       0.040100       0.382000
53859     53859     shanxi         110.6667       36.1000           96       163     2012      03        09        069              0.093333       4.078461       0.000000       0.207516       0.088000       0.056000       0.039200       0.501000
53859     53859     shanxi         110.6667       36.1000           96       163     2012      03        10        070              0.093875       4.652405       0.000000       0.208520       0.096000   -9999.000000   -9999.000000       0.238000
53859     53859     shanxi         110.6667       36.1000           96       163     2012      03        11        071              0.094875       6.019806       0.000000       0.207618       0.085000   -9999.000000       0.034800   -9999.000000
53859     53859     shanxi         110.6667       36.1000           96       163     2012      03        12        072              0.095542       5.739685       0.000000       0.204380   -9999.000000       0.127800       0.031900       0.398000
53859     53859     shanxi         110.6667       36.1000           96       163     2012      03        13        073              0.097000       6.116516       0.000000       0.203452   -9999.000000   -9999.000000       0.035600       0.433000
53859     53859     shanxi         110.6667       36.1000           96       163     2012      03        14        074              0.099375       8.633331       0.451800       0.203364       0.077000       0.084300   -9999.000000       0.613000
53859     53859     shanxi         110.6667       36.1000           96       163     2012      03        15        075              0.122417       9.302185       0.269248       0.202396       0.092000   -9999.000000       0.043500       0.682000
53859     53859     shanxi         110.6667       36.1000           96       163     2012      03        16        076              0.124833       4.391602       0.000000       0.204693       0.086000       0.308100   -9999.000000   -9999.000000
53859     53859     shanxi         110.6667       36.1000           96       163     2012      03        17        077              0.119292       9.309570       0.000000       0.204082       0.083000       0.047200       0.040200       0.450000
53859     53859     shanxi         110.6667       36.1000           96       163     2012      03        18        078              0.116250      11.738190       0.049374       0.198790       0.091000   -9999.000000       0.045100       0.356000
53859     53859     shanxi         110.6667       36.1000           96       163     2012      03        19        079              0.118500      11.225555       0.000000       0.193667       0.092000   -9999.000000       0.044500       0.703000
53859     53859     shanxi         110.6667       36.1000           96       163     2012      03        20        080              0.117292       5.877686       0.000000       0.195844       0.081500       0.060100       0.048000       0.420000
53859     53859     shanxi         110.6667       36.1000           96       163     2012      03        21        081              0.150208       7.547150       1.210955       0.197535   -9999.000000   -9999.000000       0.056900   -9999.000000
53859     53859     shanxi         110.6667       36.1000           96       163     2012      03        22        082              0.180292       2.853943       0.218121       0.203720       0.110000       0.072000   -9999.000000       0.764000
53859     53859     shanxi         110.6667       36.1000           96       163     2012      03        23        083              0.160583       3.702972       0.076468       0.212936   -9999.000000   -9999.000000       0.045800   -9999.000000
53859     53859     shanxi         110.6667       36.1000           96       163     2012      03        24        084              0.142542       6.253113       0.000000       0.205555   -9999.000000       0.281700   -9999.000000       0.389000
53859     53859     shanxi         110.6667       36.1000           96       163     2012      03        25        085              0.000000       9.561005       0.000000       0.200855       0.083500       0.212400       0.041500       0.442000
53859     53859     shanxi         110.6667       36.1000           96       163     2012      03        26        086              0.124500      11.907806       0.000000       0.192215       0.088500   -9999.000000       0.051500   -9999.000000
53859     53859     shanxi         110.6667       36.1000           96       163     2012      03        27        087              0.116750      13.204651       0.000000       0.184244       0.081000       0.116700   -9999.000000       0.430000
53859     53859     shanxi         110.6667       36.1000           96       163     2012      03        28        088              0.122333      14.440704       0.799173       0.177506   -9999.000000   -9999.000000       0.062000   -9999.000000
53859     53859     shanxi         110.6667       36.1000           96       163     2012      03        29        089              0.129875      13.221680       0.000000       0.184906       0.096000   -9999.000000       0.054300       0.509000
53859     53859     shanxi         110.6667       36.1000           96       163     2012      03        30        090              0.117042      14.314148       1.435220       0.186268       0.073000   -9999.000000       0.050600   -9999.000000
53859     53859     shanxi         110.6667       36.1000           96       163     2012      03        31        091              0.110750       9.871948       0.000000       0.181256       0.080000   -9999.000000       0.047500       0.558000
53859     53859     shanxi         110.6667       36.1000           96       163     2012      04        01        092              0.105042      13.794830       0.147377       0.175035       0.083000       0.120100       0.045200       0.400000
53859     53859     shanxi         110.6667       36.1000           96       163     2012      04        02        093              0.099083      15.740936       0.104694       0.170754       0.092000   -9999.000000   -9999.000000   -9999.000000
53859     53859     shanxi         110.6667       36.1000           96       163     2012      04        03        094              0.095083      10.397125       0.000000       0.172427       0.086000   -9999.000000       0.052600       0.306000
53859     53859     shanxi         110.6667       36.1000           96       163     2012      04        04        095              0.089750      13.210114       0.000000       0.169320       0.081500   -9999.000000       0.048900   -9999.000000
53859     53859     shanxi         110.6667       36.1000           96       163     2012      04        05        096              0.083250      16.041473       0.000000       0.165917       0.078000   -9999.000000       0.041800       0.354000
53859     53859     shanxi         110.6667       36.1000           96       163     2012      04        06        097              0.077958      15.631012       0.000000       0.163907       0.082000       0.049300       0.044100       0.259000
53859     53859     shanxi         110.6667       36.1000           96       163     2012      04        07        098              0.072625      15.546082       0.000000       0.162796       0.084000   -9999.000000       0.044300       0.518000
53859     53859     shanxi         110.6667       36.1000           96       163     2012      04        08        099              0.067125      17.607422       0.000000       0.161562       0.080000   -9999.000000   -9999.000000       0.319000
53859     53859     shanxi         110.6667       36.1000           96       163     2012      04        09        100              0.062875      19.545380       0.492195       0.160258       0.089000   -9999.000000       0.055500   -9999.000000
53859     53859     shanxi         110.6667       36.1000           96       163     2012      04        10        101              0.061083      17.432220       0.108262       0.166442       0.080500   -9999.000000       0.057800       0.394000
53859     53859     shanxi         110.6667       36.1000           96       163     2012      04        11        102              0.057833      18.306854       6.899631       0.166857       0.079000   -9999.000000       0.046400       0.567000
53859     53859     shanxi         110.6667       36.1000           96       163     2012      04        12        103              0.063250      15.988281       0.000000       0.187669       0.093000   -9999.000000       0.056300       0.857000
53859     53859     shanxi         110.6667       36.1000           96       163     2012      04        13        104              0.066083      11.967773       0.000000       0.242013       0.091000   -9999.000000   -9999.000000       0.320000
53859     53859     shanxi         110.6667       36.1000           96       163     2012      04        14        105              0.064000      16.011749       0.441121       0.212267       0.091000       0.130000       0.052000   -9999.000000
53859     53859     shanxi         110.6667       36.1000           96       163     2012      04        15        106              0.060958      15.856415       0.000000       0.198429       0.077500   -9999.000000       0.047600       0.267000
53859     53859     shanxi         110.6667       36.1000           96       163     2012      04        16        107              0.056792      18.616150       0.000000       0.183992       0.084000   -9999.000000       0.067000       0.280000
53859     53859     shanxi         110.6667       36.1000           96       163     2012      04        17        108              0.054125      19.443451       2.352635       0.172708       0.081000       0.041000       0.062700       0.519000
53859     53859     shanxi         110.6667       36.1000           96       163     2012      04        18        109              0.053958      16.526978       0.000000       0.171357   -9999.000000   -9999.000000   -9999.000000       0.236000
53859     53859     shanxi         110.6667       36.1000           96       163     2012      04        19        110              0.051625      20.227936       0.103742       0.167891       0.077000       0.094500   -9999.000000   -9999.000000
53859     53859     shanxi         110.6667       36.1000           96       163     2012      04        20        111              0.049958      20.033417       0.000000       0.163648       0.093000   -9999.000000       0.065200       0.098000
53859     53859     shanxi         110.6667       36.1000           96       163     2012      04        21        112              0.049125      17.989136       0.000000       0.163713       0.087000       0.491300       0.054900   -9999.000000
53859     53859     shanxi         110.6667       36.1000           96       163     2012      04        22        113              0.047708      21.575378       0.000000       0.160815       0.082000   -9999.000000   -9999.000000       0.282000
53859     53859     shanxi         110.6667       36.1000           96       163     2012      04        23        114              0.086167      23.765228       3.296679       0.158526       0.085000   -9999.000000       0.062600       0.214000
53859     53859     shanxi         110.6667       36.1000           96       163     2012      04        24        115              0.177375      23.693787       0.795801       0.179552       0.121000       0.173000       0.092700   -9999.000000
53859     53859     shanxi         110.6667       36.1000           96       163     2012      04        25        116              0.000000      15.676208       0.000000       0.207470       0.099500       0.113400   -9999.000000       0.309000
53859     53859     shanxi         110.6667       36.1000           96       163     2012      04        26        117              0.132958      16.584534       0.000000       0.183999       0.086500       0.466800       0.070400   -9999.000000
53859     53859     shanxi         110.6667       36.1000           96       163     2012      04        27        118              0.120542      20.329468       0.000000       0.170338       0.085000   -9999.000000       0.054400       0.222000
53859     53859     shanxi         110.6667       36.1000           96       163     2012      04        28        119              0.109083      22.898071       4.573828       0.161942       0.080000   -9999.000000       0.060200   -9999.000000
53859     53859     shanxi         110.6667       36.1000           96       163     2012      04        29        120              0.098875      23.929779       0.000000       0.195219       0.090000       0.197400       0.059300       0.319000
53859     53859     shanxi         110.6667       36.1000           96       163     2012      04        30        121              0.092417      23.210602       0.830859       0.194919       0.097000   -9999.000000   -9999.000000       0.527000
53859     53859     shanxi         110.6667       36.1000           96       163     2012      05        01        122              0.088833      19.979584       0.428890       0.190267       0.128000   -9999.000000       0.092900   -9999.000000
53859     53859     shanxi         110.6667       36.1000           96       163     2012      05        02        123              0.086542      18.881744       0.000000       0.192381       0.125000       0.058900       0.082100       0.265000
53859     53859     shanxi         110.6667       36.1000           96       163     2012      05        03        124              0.082083      21.567169       0.000000       0.182112       0.117000   -9999.000000       0.080300   -9999.000000
53859     53859     shanxi         110.6667       36.1000           96       163     2012      05        04        125              0.075458      21.605743       0.436028       0.171116       0.119000   -9999.000000       0.078600       0.379000
53859     53859     shanxi         110.6667       36.1000           96       163     2012      05        05        126              0.070708      23.403595       0.000000       0.166264       0.110000   -9999.000000       0.073700       0.258000
53859     53859     shanxi         110.6667       36.1000           96       163     2012      05        06        127              0.064042      25.338287       1.410786       0.158743       0.108000   -9999.000000   -9999.000000       0.454000
53859     53859     shanxi         110.6667       36.1000           96       163     2012      05        07        128              0.068792      25.991150       1.385522       0.158468   -9999.000000       0.200800       0.090600       0.365000
53859     53859     shanxi         110.6667       36.1000           96       163     2012      05        08        129              0.067917      22.502411       0.293095       0.190213       0.110000   -9999.000000       0.091500   -9999.000000
53859     53859     shanxi         110.6667       36.1000           96       163     2012      05        09        130              0.061792      25.673981       0.122295       0.169616   -9999.000000       0.321200       0.081000       0.404000
53859     53859     shanxi         110.6667       36.1000           96       163     2012      05        10        131              0.054348      23.721954       0.170929       0.160243       0.107000       0.294600       0.079900       0.279000
53859     53859     shanxi         110.6667       36.1000           96       163     2012      05        11        132              0.050292      26.826782       1.262137       0.154215       0.171000   -9999.000000   -9999.000000       0.684000
53859     53859     shanxi         110.6667       36.1000           96       163     2012      05        12        133              0.044750      19.242615       0.000000       0.173770       0.136000       0.120700       0.089100       0.248000
53859     53859     shanxi         110.6667       36.1000           96       163     2012      05        13        134              0.040750      18.046112       0.000000       0.162810       0.141000       0.128600       0.084400   -9999.000000
53859     53859     shanxi         110.6667       36.1000           96       163     2012      05        14        135              0.042167      19.435059       0.000000       0.155872       0.128000       0.497200       0.107600       0.250000
53859     53859     shanxi         110.6667       36.1000           96       163     2012      05        15        136              0.038917      21.698883       0.000000       0.151318       0.139000   -9999.000000       0.108100       0.146000
53859     53859     shanxi         110.6667       36.1000           96       163     2012      05        16        137              0.034917      23.006744       0.184154       0.148687       0.141000   -9999.000000       0.097500       0.359000
53859     53859     shanxi         110.6667       36.1000           96       163     2012      05        17        138              0.033000      23.011993       0.365764       0.147607       0.128000       0.123700   -9999.000000       0.240000
53859     53859     shanxi         110.6667       36.1000           96       163     2012      05        18        139              0.031500      25.121155       0.000000       0.146292       0.143000   -9999.000000       0.112700   -9999.000000
53859     53859     shanxi         110.6667       36.1000           96       163     2012      05        19        140              0.030042      26.256165       0.000000       0.146022       0.133000   -9999.000000       0.107800       0.264000
53859     53859     shanxi         110.6667       36.1000           96       163     2012      05        20        141              0.028000      28.135406       0.137511       0.145499   -9999.000000       0.192700       0.104600   -9999.000000
53859     53859     shanxi         110.6667       36.1000           96       163     2012      05        21        142              0.026500      27.679596       5.497033       0.145539   -9999.000000   -9999.000000       0.123700       0.671000
53859     53859     shanxi         110.6667       36.1000           96       163     2012      05        22        143              0.037583      18.765747       0.393814       0.202533       0.162000       0.197300       0.105900       0.276000
53859     53859     shanxi         110.6667       36.1000           96       163     2012      05        23        144              0.040250      20.076172       0.112367       0.207044   -9999.000000   -9999.000000   -9999.000000   -9999.000000
53859     53859     shanxi         110.6667       36.1000           96       163     2012      05        24        145              0.037792      20.605042       0.000000       0.183352       0.138000   -9999.000000       0.109900       0.200000
53859     53859     shanxi         110.6667       36.1000           96       163     2012      05        25        146              0.000000      18.976501       0.000000       0.172030       0.179000       0.121000       0.113400   -9999.000000
53859     53859     shanxi         110.6667       36.1000           96       163     2012      05        26        147              0.037500      22.850555       0.229373       0.159486       0.164000   -9999.000000       0.099000       0.299000
53859     53859     shanxi         110.6667       36.1000           96       163     2012      05        27        148              0.033500      25.706909       0.000000       0.152003       0.157000       0.289000       0.102200   -9999.000000
53859     53859     shanxi         110.6667       36.1000           96       163     2012      05        28        149              0.048042      27.234161      25.401939       0.148624       0.161000   -9999.000000   -9999.000000       0.313000
53859     53859     shanxi         110.6667       36.1000           96       163     2012      05        29        150              0.118208      25.186829       0.000000       0.219108       0.166000   -9999.000000       0.121200       0.529000
53859     53859     shanxi         110.6667       36.1000           96       163     2012      05        30        151              0.093375      22.213013       0.000000       0.280185       0.175000       0.142200       0.111300   -9999.000000
53859     53859     shanxi         110.6667       36.1000           96       163     2012      05        31        152              0.078208      23.499023       0.212681       0.243915       0.162000   -9999.000000       0.090800   -9999.000000
53859     53859     shanxi         110.6667       36.1000           96       163     2012      06        01        153              0.071917      22.265869       4.112070       0.227599       0.133000   -9999.000000       0.090900   -9999.000000
53859     53859     shanxi         110.6667       36.1000           96       163     2012      06        02        154              0.068500      22.914886       0.510795       0.239545       0.131000   -9999.000000       0.103600       0.452000
53859     53859     shanxi         110.6667       36.1000           96       163     2012      06        03        155              0.060708      24.140778       0.000000       0.228492       0.132000   -9999.000000   -9999.000000       0.387000
53859     53859     shanxi         110.6667       36.1000           96       163     2012      06        04        156              0.056833      24.072815       1.510731       0.207786       0.141000       0.151100       0.121700       0.482000
53859     53859     shanxi         110.6667       36.1000           96       163     2012      06        05        157              0.055250      24.076141       2.174152       0.207735       0.122000       0.069500       0.132200       0.407000
53859     53859     shanxi         110.6667       36.1000           96       163     2012      06        06        158              0.053167      22.869659       1.249577       0.213990       0.153000   -9999.000000       0.135000   -9999.000000
53859     53859     shanxi         110.6667       36.1000           96       163     2012      06        07        159              0.057875      20.089813       4.471163       0.228877       0.136000       0.094100       0.118500       0.461000
53859     53859     shanxi         110.6667       36.1000           96       163     2012      06        08        160              0.061958      23.182404       0.000000       0.241793       0.144000   -9999.000000       0.114600       0.337000
53859     53859     shanxi         110.6667       36.1000           96       163     2012      06        09        161              0.058708      22.732849       0.000000       0.222762       0.130000   -9999.000000   -9999.000000       0.431000
53859     53859     shanxi         110.6667       36.1000           96       163     2012      06        10        162              0.047208      26.810791       0.000000       0.195812       0.133000   -9999.000000       0.112400       0.324000
53859     53859     shanxi         110.6667       36.1000           96       163     2012      06        11        163              0.000000      24.478088       0.000000       0.177878       0.137000   -9999.000000       0.161200   -9999.000000
53859     53859     shanxi         110.6667       36.1000           96       163     2012      06        12        164              0.035125      26.248108       0.062480       0.165483       0.131500       0.125600       0.138700       0.260000
53859     53859     shanxi         110.6667       36.1000           96       163     2012      06        13        165              0.029435      28.435120       0.030495       0.159135       0.140500   -9999.000000       0.136400       0.296000
53859     53859     shanxi         110.6667       36.1000           96       163     2012      06        14        166              0.024208      29.327850       0.000000       0.156237       0.132000   -9999.000000   -9999.000000       0.438000
53859     53859     shanxi         110.6667       36.1000           96       163     2012      06        15        167              0.020458      26.852692       0.000000       0.154271   -9999.000000   -9999.000000       0.145900       0.215000
53859     53859     shanxi         110.6667       36.1000           96       163     2012      06        16        168              0.017500      27.205048       0.000000       0.152216       0.128000   -9999.000000       0.143700   -9999.000000
53859     53859     shanxi         110.6667       36.1000           96       163     2012      06        17        169              0.014875      29.136444       0.000000       0.150425       0.136500       0.123600       0.141600       0.296000
53859     53859     shanxi         110.6667       36.1000           96       163     2012      06        18        170              0.012875      29.944916       0.000000       0.149398       0.135500   -9999.000000       0.109200   -9999.000000
53859     53859     shanxi         110.6667       36.1000           96       163     2012      06        19        171              0.011167      30.619690       2.099085       0.148382       0.155000   -9999.000000       0.111900       0.351000
53859     53859     shanxi         110.6667       36.1000           96       163     2012      06        20        172              0.010375      28.325073       0.610971       0.164054       0.152000   -9999.000000   -9999.000000       0.234000
53859     53859     shanxi         110.6667       36.1000           96       163     2012      06        21        173              0.009333      27.549500       0.126782       0.162983       0.142000   -9999.000000       0.117500   -9999.000000
53859     53859     shanxi         110.6667       36.1000           96       163     2012      06        22        174              0.009167      27.908691       0.000000       0.151802       0.142000       0.101900       0.121300       0.312000
53859     53859     shanxi         110.6667       36.1000           96       163     2012      06        23        175              0.036125      31.077057      24.851053       0.147181       0.139500   -9999.000000       0.109500   -9999.000000
53859     53859     shanxi         110.6667       36.1000           96       163     2012      06        24        176              0.162792      30.932495       0.795243       0.199203       0.164000   -9999.000000       0.133500       0.797000
53859     53859     shanxi         110.6667       36.1000           96       163     2012      06        25        177              0.130833      25.753540       1.335418       0.319931   -9999.000000       0.230200       0.122900   -9999.000000
53859     53859     shanxi         110.6667       36.1000           96       163     2012      06        26        178              0.127174      24.177948       0.994709       0.268013       0.176000   -9999.000000   -9999.000000       0.879000
53859     53859     shanxi         110.6667       36.1000           96       163     2012      06        27        179              0.116750      22.920258       0.142578       0.257511       0.173000   -9999.000000       0.126600       0.535000
53859     53859     shanxi         110.6667       36.1000           96       163     2012      06        28        180              0.111833      23.156708       9.685042       0.240667       0.156000       0.112800       0.131900   -9999.000000
53859     53859     shanxi         110.6667       36.1000           96       163     2012      06        29        181              0.173542      22.790222       2.871374       0.248049       0.193000   -9999.000000       0.137500       1.000000
53859     53859     shanxi         110.6667       36.1000           96       163     2012      06        30        182              0.147625      23.173737       0.000000       0.290173       0.164000       0.173100       0.110600   -9999.000000
53859     53859     shanxi         110.6667       36.1000           96       163     2012      07        01        183              0.119625      26.472534       0.000000       0.253146       0.157000   -9999.000000   -9999.000000       0.669000
53859     53859     shanxi         110.6667       36.1000           96       163     2012      07        02        184              0.099667      27.512085       0.000000       0.228642       0.168000   -9999.000000       0.126600       0.404000
53859     53859     shanxi         110.6667       36.1000           96       163     2012      07        03        185              0.085750      27.405487       0.632842       0.209959       0.152500   -9999.000000       0.103900       0.513000
53859     53859     shanxi         110.6667       36.1000           96       163     2012      07        04        186              0.073417      28.050629       0.176259       0.194552       0.177000   -9999.000000       0.131800       0.550000
53859     53859     shanxi         110.6667       36.1000           96       163     2012      07        05        187              0.068958      24.894165       0.253816       0.190301       0.161000       0.142600       0.119100   -9999.000000
53859     53859     shanxi         110.6667       36.1000           96       163     2012      07        06        188              0.059458      28.877045       0.827803       0.178318   -9999.000000   -9999.000000       0.123300       0.433000
53859     53859     shanxi         110.6667       36.1000           96       163     2012      07        07        189              0.052667      28.483734       0.403575       0.169316   -9999.000000   -9999.000000   -9999.000000       0.397000
53859     53859     shanxi         110.6667       36.1000           96       163     2012      07        08        190              0.177696      26.923584      31.839239       0.169932       0.248000       0.214000       0.149400       1.000000
53859     53859     shanxi         110.6667       36.1000           96       163     2012      07        09        191              0.199458      23.250275       5.683842       0.318481       0.215000   -9999.000000       0.168700       1.000000
53859     53859     shanxi         110.6667       36.1000           96       163     2012      07        10        192              0.168458      23.482544       0.000000       0.310699       0.174000       0.084700       0.170000   -9999.000000
53859     53859     shanxi         110.6667       36.1000           96       163     2012      07        11        193              0.144375      27.184174       0.854182       0.280675       0.162000       0.076900       0.165100       0.796000
53859     53859     shanxi         110.6667       36.1000           96       163     2012      07        12        194              0.122708      26.680511       0.000000       0.265212       0.163000   -9999.000000   -9999.000000       0.384000
53859     53859     shanxi         110.6667       36.1000           96       163     2012      07        13        195              0.106042      27.806244       2.468967       0.244979       0.199000   -9999.000000   -9999.000000       0.620000
53859     53859     shanxi         110.6667       36.1000           96       163     2012      07        14        196              0.096292      25.941223       0.554680       0.249702       0.177000   -9999.000000       0.138800       0.389000
53859     53859     shanxi         110.6667       36.1000           96       163     2012      07        15        197              0.087458      26.404907       0.278335       0.240674       0.182000   -9999.000000       0.163500   -9999.000000
53859     53859     shanxi         110.6667       36.1000           96       163     2012      07        16        198              0.080458      25.798981       0.000000       0.228688       0.168000       0.166400       0.085600       0.396000
53859     53859     shanxi         110.6667       36.1000           96       163     2012      07        17        199              0.073000      25.695465       0.000000       0.216994       0.164000   -9999.000000       0.083300   -9999.000000
53859     53859     shanxi         110.6667       36.1000           96       163     2012      07        18        200              0.066167      25.702423       0.000000       0.204736       0.165000       0.131900   -9999.000000       0.365000
53859     53859     shanxi         110.6667       36.1000           96       163     2012      07        19        201              0.121125      26.813995       0.134334       0.193241       0.142500   -9999.000000       0.084600       0.363000
53859     53859     shanxi         110.6667       36.1000           96       163     2012      07        20        202              0.145957      28.284454       0.562127       0.183640       0.160000   -9999.000000       0.089900   -9999.000000
53859     53859     shanxi         110.6667       36.1000           96       163     2012      07        21        203              0.212042      28.416534      11.036077       0.181428   -9999.000000   -9999.000000       0.097200       0.818000
53859     53859     shanxi         110.6667       36.1000           96       163     2012      07        22        204              0.225870      24.845673       0.471756       0.259039       0.181000   -9999.000000       0.087800   -9999.000000
53859     53859     shanxi         110.6667       36.1000           96       163     2012      07        23        205              0.206167      25.834961       3.851810       0.246508   -9999.000000       0.168100       0.091000       0.484000
53859     53859     shanxi         110.6667       36.1000           96       163     2012      07        24        206              0.274167      25.013458       7.231905       0.240813       0.200000   -9999.000000   -9999.000000   -9999.000000
53859     53859     shanxi         110.6667       36.1000           96       163     2012      07        25        207              0.252250      25.150543       1.440586       0.286656       0.189000       0.244300       0.104500       0.894000
53859     53859     shanxi         110.6667       36.1000           96       163     2012      07        26        208              0.235042      26.451630       0.810620       0.267563   -9999.000000   -9999.000000       0.106800       0.633000
53859     53859     shanxi         110.6667       36.1000           96       163     2012      07        27        209              0.215333      28.466339       0.000000       0.248939       0.161000   -9999.000000       0.089100   -9999.000000
53859     53859     shanxi         110.6667       36.1000           96       163     2012      07        28        210              0.196292      29.172729       0.046578       0.227350       0.172000       0.053300       0.085100       0.501000
53859     53859     shanxi         110.6667       36.1000           96       163     2012      07        29        211              0.182167      30.739319       5.865979       0.207112       0.192000       0.024300   -9999.000000   -9999.000000
53859     53859     shanxi         110.6667       36.1000           96       163     2012      07        30        212              0.197083      29.725616      20.844711       0.237501       0.242000   -9999.000000       0.092700       0.699000
53859     53859     shanxi         110.6667       36.1000           96       163     2012      07        31        213              0.234708      26.890778       3.842916       0.300413       0.230500   -9999.000000       0.080100       0.936000
53859     53859     shanxi         110.6667       36.1000           96       163     2012      08        01        214              0.230458      23.744049       0.157697       0.305815       0.201000   -9999.000000       0.088000       0.988000
53859     53859     shanxi         110.6667       36.1000           96       163     2012      08        02        215              0.213750      24.684387       0.979653       0.286842   -9999.000000   -9999.000000       0.078000       0.795000
53859     53859     shanxi         110.6667       36.1000           96       163     2012      08        03        216              0.246583      26.499176       1.694951       0.273508       0.190000       0.033300       0.069600   -9999.000000
53859     53859     shanxi         110.6667       36.1000           96       163     2012      08        04        217              0.248000      26.755920       0.000000       0.268048       0.164500       0.248400   -9999.000000       0.716000
53859     53859     shanxi         110.6667       36.1000           96       163     2012      08        05        218              0.224167      27.071289       1.463568       0.252110       0.217000       0.100300       0.078000       0.689000
53859     53859     shanxi         110.6667       36.1000           96       163     2012      08        06        219              0.202792      26.265381       0.000000       0.251486       0.188000   -9999.000000       0.113200       0.675000
53859     53859     shanxi         110.6667       36.1000           96       163     2012      08        07        220              0.182375      26.860931       0.423708       0.236194       0.181000   -9999.000000       0.109300       0.513000
53859     53859     shanxi         110.6667       36.1000           96       163     2012      08        08        221              0.197625      28.734314       7.472126       0.218739       0.188000       0.080800       0.104000   -9999.000000
53859     53859     shanxi         110.6667       36.1000           96       163     2012      08        09        222              0.204917      28.178467       2.058123       0.260193       0.212000   -9999.000000       0.117900       0.546000
53859     53859     shanxi         110.6667       36.1000           96       163     2012      08        10        223              0.182917      25.003418       0.000000       0.265976       0.178500       0.126700   -9999.000000       0.517000
53859     53859     shanxi         110.6667       36.1000           96       163     2012      08        11        224              0.162478      26.859283       3.551373       0.237231       0.192000   -9999.000000       0.122100       0.674000
53859     53859     shanxi         110.6667       36.1000           96       163     2012      08        12        225              0.158542      27.868225       0.213797       0.232202       0.195000       0.411000       0.114600       0.496000
53859     53859     shanxi         110.6667       36.1000           96       163     2012      08        13        226              0.175917      25.780243      26.398056       0.243178   -9999.000000       0.205500       0.117500   -9999.000000
53859     53859     shanxi         110.6667       36.1000           96       163     2012      08        14        227              0.311958      23.084564      15.064213       0.273233       0.244000   -9999.000000       0.124700       0.949000
53859     53859     shanxi         110.6667       36.1000           96       163     2012      08        15        228              0.270083      22.659180       0.000000       0.337585       0.194000       0.239400   -9999.000000   -9999.000000
53859     53859     shanxi         110.6667       36.1000           96       163     2012      08        16        229              0.250167      25.141266       0.000000       0.300803       0.183000       0.077000       0.113000       0.604000
53859     53859     shanxi         110.6667       36.1000           96       163     2012      08        17        230              0.292333      25.277100      44.307625       0.286848       0.208000       0.489700       0.124500       0.997000
53859     53859     shanxi         110.6667       36.1000           96       163     2012      08        18        231              0.322292      24.347290      13.645468       0.334493   -9999.000000       0.374700       0.118500   -9999.000000
53859     53859     shanxi         110.6667       36.1000           96       163     2012      08        19        232              0.285125      21.802673       0.389807       0.352375       0.226000   -9999.000000       0.124000       0.937000
53859     53859     shanxi         110.6667       36.1000           96       163     2012      08        20        233              0.269333      22.101715       0.417454       0.326035       0.211000       0.303700       0.145600   -9999.000000
53859     53859     shanxi         110.6667       36.1000           96       163     2012      08        21        234              0.251708      22.900177       0.000000       0.315882       0.180000       0.088900   -9999.000000       0.944000
53859     53859     shanxi         110.6667       36.1000           96       163     2012      08        22        235              0.240250      21.542267       0.000000       0.303290       0.176000   -9999.000000       0.147600   -9999.000000
53859     53859     shanxi         110.6667       36.1000           96       163     2012      08        23        236              0.229208      22.015717       0.000000       0.295383       0.166000       0.122300       0.145900       0.630000
53859     53859     shanxi         110.6667       36.1000           96       163     2012      08        24        237              0.220875      20.861084       0.000000       0.288583   -9999.000000   -9999.000000       0.147600       0.552000
53859     53859     shanxi         110.6667       36.1000           96       163     2012      08        25        238              0.000000      22.713165       0.000000       0.282444       0.193000       0.202600       0.139700   -9999.000000
53859     53859     shanxi         110.6667       36.1000           96       163     2012      08        26        239              0.213250      22.638489       1.305953       0.280083       0.170500       0.171000       0.130900       0.560000
53859     53859     shanxi         110.6667       36.1000           96       163     2012      08        27        240              0.208417      22.873749       2.474358       0.280731       0.181000   -9999.000000   -9999.000000   -9999.000000
53859     53859     shanxi         110.6667       36.1000           96       163     2012      08        28        241              0.202333      23.805206       0.000000       0.280908       0.179000       0.086400       0.133900       0.562000
53859     53859     shanxi         110.6667       36.1000           96       163     2012      08        29        242              0.196625      24.756256       0.493975       0.271017   -9999.000000       0.202000       0.150100       0.505000
53859     53859     shanxi         110.6667       36.1000           96       163     2012      08        30        243              0.190250      25.142944       1.039535       0.261873       0.164000   -9999.000000       0.135300       0.640000
53859     53859     shanxi         110.6667       36.1000           96       163     2012      08        31        244              0.203583      24.628510      15.557803       0.255348       0.227000       0.154500       0.156600       0.656000
53859     53859     shanxi         110.6667       36.1000           96       163     2012      09        01        245              0.331083      21.573151      45.215157       0.305637   -9999.000000   -9999.000000   -9999.000000   -9999.000000
53859     53859     shanxi         110.6667       36.1000           96       163     2012      09        02        246              0.291625      19.121918       0.000000       0.366933       0.207000       0.136800       0.156300       0.927000
53859     53859     shanxi         110.6667       36.1000           96       163     2012      09        03        247              0.272292      19.802582       0.000000       0.328738       0.189000       0.080300       0.150700       0.774000
53859     53859     shanxi         110.6667       36.1000           96       163     2012      09        04        248              0.261250      20.389099       0.000000       0.314669       0.208000   -9999.000000       0.161100       0.833000
53859     53859     shanxi         110.6667       36.1000           96       163     2012      09        05        249              0.253833      21.622406       1.999268       0.306606       0.196000       0.172700       0.164600       0.760000
53859     53859     shanxi         110.6667       36.1000           96       163     2012      09        06        250              0.261208      22.209137       4.246975       0.306717       0.229000   -9999.000000       0.175600   -9999.000000
53859     53859     shanxi         110.6667       36.1000           96       163     2012      09        07        251              0.257458      19.205048       0.252534       0.316706       0.209000   -9999.000000   -9999.000000       0.739000
53859     53859     shanxi         110.6667       36.1000           96       163     2012      09        08        252              0.248250      21.173767       0.577096       0.306815       0.209000       0.239100       0.176000       0.689000
53859     53859     shanxi         110.6667       36.1000           96       163     2012      09        09        253              0.240708      21.961792       0.085419       0.302080   -9999.000000   -9999.000000       0.159300       0.842000
53859     53859     shanxi         110.6667       36.1000           96       163     2012      09        10        254              0.290042      21.883606      14.488342       0.294446       0.236000       0.146700       0.174200       0.999000
53859     53859     shanxi         110.6667       36.1000           96       163     2012      09        11        255              0.283500      18.553497       0.000000       0.329921       0.201000   -9999.000000       0.174300   -9999.000000
53859     53859     shanxi         110.6667       36.1000           96       163     2012      09        12        256              0.261958      19.941162       0.000000       0.313974       0.198500       0.242500       0.165200       0.730000
53859     53859     shanxi         110.6667       36.1000           96       163     2012      09        13        257              0.252042      16.362335       0.000000       0.303936       0.183000       0.130900   -9999.000000   -9999.000000
53859     53859     shanxi         110.6667       36.1000           96       163     2012      09        14        258              0.245333      16.989349       0.000000       0.297483       0.192000   -9999.000000       0.160400       0.435000
53859     53859     shanxi         110.6667       36.1000           96       163     2012      09        15        259              0.239042      18.172760       0.000000       0.292363       0.200000       0.177000       0.170200       0.431000
53859     53859     shanxi         110.6667       36.1000           96       163     2012      09        16        260              0.233208      18.452026       0.000000       0.288256       0.189000       0.126700       0.155600   -9999.000000
53859     53859     shanxi         110.6667       36.1000           96       163     2012      09        17        261              0.228917      17.780426       0.530301       0.286288       0.181000       0.492000       0.134700       0.470000
53859     53859     shanxi         110.6667       36.1000           96       163     2012      09        18        262              0.225458      18.238922       0.292778       0.285931       0.193000       0.127800   -9999.000000   -9999.000000
53859     53859     shanxi         110.6667       36.1000           96       163     2012      09        19        263              0.220750      19.215363       0.000000       0.283576       0.188000   -9999.000000       0.130000       0.451000
53859     53859     shanxi         110.6667       36.1000           96       163     2012      09        20        264              0.224125      20.013458       3.249265       0.277846       0.212000       0.101100       0.150300   -9999.000000
53859     53859     shanxi         110.6667       36.1000           96       163     2012      09        21        265              0.235292      18.542786       0.158301       0.288505   -9999.000000       0.165900       0.129700       0.805000
53859     53859     shanxi         110.6667       36.1000           96       163     2012      09        22        266              0.229208      18.520355       0.222122       0.289906       0.156500   -9999.000000       0.126100       0.569000
53859     53859     shanxi         110.6667       36.1000           96       163     2012      09        23        267              0.221292      19.555145       0.000000       0.281911       0.173000       0.295800       0.127900   -9999.000000
53859     53859     shanxi         110.6667       36.1000           96       163     2012      09        24        268              0.217333      19.757782       0.000000       0.277168       0.161000   -9999.000000   -9999.000000       0.443000
53859     53859     shanxi         110.6667       36.1000           96       163     2012      09        25        269              0.237917      19.461212       5.541911       0.273523   -9999.000000       0.148700       0.166600   -9999.000000
53859     53859     shanxi         110.6667       36.1000           96       163     2012      09        26        270              0.247042      16.811768       0.000000       0.296108       0.184000       0.236100       0.174400       0.777000
53859     53859     shanxi         110.6667       36.1000           96       163     2012      09        27        271              0.238786      17.297821       0.000000       0.289791       0.167000       0.553300       0.149700       0.474000
53859     53859     shanxi         110.6667       36.1000           96       163     2012      09        28        272              0.221533      16.591675       0.000000       0.279759       0.161500   -9999.000000       0.160900       0.557000
53859     53859     shanxi         110.6667       36.1000           96       163     2012      09        29        273              0.216583      14.497131       0.000000       0.274043       0.170000   -9999.000000   -9999.000000       0.359000
53859     53859     shanxi         110.6667       36.1000           96       163     2012      09        30        274              0.212125      14.812805       0.000000       0.270361       0.168000       0.161700       0.155200   -9999.000000
53859     53859     shanxi         110.6667       36.1000           96       163     2012      10        01        275              0.208250      15.426636       0.000000       0.267070       0.160000   -9999.000000       0.117000       0.484000
53859     53859     shanxi         110.6667       36.1000           96       163     2012      10        02        276              0.205250      16.188904       0.000000       0.264929       0.148000   -9999.000000       0.122600       0.445000
53859     53859     shanxi         110.6667       36.1000           96       163     2012      10        03        277              0.202750      17.520111       0.722704       0.262643       0.144000       0.152800       0.109300       0.611000
53859     53859     shanxi         110.6667       36.1000           96       163     2012      10        04        278              0.222333      18.325775       3.314663       0.259441       0.165000   -9999.000000       0.126700       0.774000
53859     53859     shanxi         110.6667       36.1000           96       163     2012      10        05        279              0.229333      15.529449       0.000000       0.278184       0.152000       0.464700   -9999.000000   -9999.000000
53859     53859     shanxi         110.6667       36.1000           96       163     2012      10        06        280              0.222375      15.448273       0.000000       0.269869   -9999.000000       0.147500       0.117600       0.482000
53859     53859     shanxi         110.6667       36.1000           96       163     2012      10        07        281              0.217667      16.118286       0.000000       0.264141       0.155000   -9999.000000       0.126000       0.448000
53859     53859     shanxi         110.6667       36.1000           96       163     2012      10        08        282              0.215708      14.676331       0.076788       0.264755       0.140000       0.217100       0.126800       0.560000
53859     53859     shanxi         110.6667       36.1000           96       163     2012      10        09        283              0.207917      15.269073       0.000000       0.263912       0.144500       0.005100       0.116200       0.291000
53859     53859     shanxi         110.6667       36.1000           96       163     2012      10        10        284              0.202500      14.398895       0.000000       0.257887       0.151000       0.352200       0.122300   -9999.000000
53859     53859     shanxi         110.6667       36.1000           96       163     2012      10        11        285              0.199750      15.084686       0.000000       0.254226       0.114000       0.149300   -9999.000000       0.362000
53859     53859     shanxi         110.6667       36.1000           96       163     2012      10        12        286              0.196333      16.422668       0.000000       0.252246       0.117000   -9999.000000       0.114700   -9999.000000
53859     53859     shanxi         110.6667       36.1000           96       163     2012      10        13        287              0.192458      15.835602       0.000000       0.250131       0.123000   -9999.000000       0.118900       0.390000
53859     53859     shanxi         110.6667       36.1000           96       163     2012      10        14        288              0.190750      15.801483       0.029827       0.246320       0.122000       0.103000       0.112100       0.274000
53859     53859     shanxi         110.6667       36.1000           96       163     2012      10        15        289              0.191958      14.989105       5.672460       0.245515       0.132500   -9999.000000       0.104600   -9999.000000
53859     53859     shanxi         110.6667       36.1000           96       163     2012      10        16        290              0.206875      13.692749       1.744906       0.263231       0.127000       0.157100   -9999.000000       0.489000
53859     53859     shanxi         110.6667       36.1000           96       163     2012      10        17        291              0.201875      10.619934       0.458452       0.274663       0.134000   -9999.000000       0.113000   -9999.000000
53859     53859     shanxi         110.6667       36.1000           96       163     2012      10        18        292              0.199750      11.047760       0.077779       0.263170       0.137000       0.141800       0.111100       0.442000
53859     53859     shanxi         110.6667       36.1000           96       163     2012      10        19        293              0.196958      12.107361       0.000000       0.259762       0.119500       0.237900       0.104400   -9999.000000
53859     53859     shanxi         110.6667       36.1000           96       163     2012      10        20        294              0.194333      13.565430       0.000000       0.256441       0.126500   -9999.000000       0.102800       0.354000
53859     53859     shanxi         110.6667       36.1000           96       163     2012      10        21        295              0.210333      15.038605       5.270283       0.253371       0.137000       0.195200       0.119800       0.678000
53859     53859     shanxi         110.6667       36.1000           96       163     2012      10        22        296              0.218958       9.155487       0.000000       0.281857   -9999.000000   -9999.000000   -9999.000000   -9999.000000
53859     53859     shanxi         110.6667       36.1000           96       163     2012      10        23        297              0.215000       9.324585       0.000000       0.271825   -9999.000000   -9999.000000       0.098400       0.395000
53859     53859     shanxi         110.6667       36.1000           96       163     2012      10        24        298              0.210083       8.406464       0.000000       0.267639   -9999.000000       0.164400       0.102500   -9999.000000
53859     53859     shanxi         110.6667       36.1000           96       163     2012      10        25        299              0.000000      10.375549       0.000000       0.263126       0.128000   -9999.000000       0.088300       0.453000
53859     53859     shanxi         110.6667       36.1000           96       163     2012      10        26        300              0.203750      10.730377       0.000000       0.260425       0.139000       0.093800       0.106800       0.393000
53859     53859     shanxi         110.6667       36.1000           96       163     2012      10        27        301              0.200625      10.336700       0.000000       0.260790       0.131000       0.131300       0.090100       0.519000
53859     53859     shanxi         110.6667       36.1000           96       163     2012      10        28        302              0.000000      11.850739       0.144116       0.257146       0.137000   -9999.000000   -9999.000000       0.374000
53859     53859     shanxi         110.6667       36.1000           96       163     2012      10        29        303              0.193792      11.680481       0.000000       0.256521       0.137000       0.109100       0.083600   -9999.000000
53859     53859     shanxi         110.6667       36.1000           96       163     2012      10        30        304              0.187500      10.562897       0.000000       0.254178       0.129000   -9999.000000       0.099400       0.370000
53859     53859     shanxi         110.6667       36.1000           96       163     2012      10        31        305              0.184083       8.100220       0.000000       0.250662       0.142000   -9999.000000       0.084600       0.271000
53859     53859     shanxi         110.6667       36.1000           96       163     2012      11        01        306              0.182292       8.316833       0.351774       0.248608       0.116000   -9999.000000       0.090900       0.460000
53859     53859     shanxi         110.6667       36.1000           96       163     2012      11        02        307              0.187708       9.167480       1.752198       0.248067   -9999.000000   -9999.000000   -9999.000000       0.292000
53859     53859     shanxi         110.6667       36.1000           96       163     2012      11        03        308              0.232458      10.941376       1.246039       0.252185   -9999.000000       0.460200       0.089200   -9999.000000
53859     53859     shanxi         110.6667       36.1000           96       163     2012      11        04        309              0.223333       3.981049       0.077814       0.253344       0.138000   -9999.000000       0.086100       0.298000
53859     53859     shanxi         110.6667       36.1000           96       163     2012      11        05        310              0.215917       2.575012       0.259402       0.236031       0.126000   -9999.000000       0.080100       0.286000
53859     53859     shanxi         110.6667       36.1000           96       163     2012      11        06        311              0.214083       3.381531       0.426045       0.238534       0.129000       0.118300       0.082500       0.542000
53859     53859     shanxi         110.6667       36.1000           96       163     2012      11        07        312              0.212875       5.718353       0.071567       0.254114       0.132000   -9999.000000       0.079300       0.343000
53859     53859     shanxi         110.6667       36.1000           96       163     2012      11        08        313              0.208375       4.760529       0.000000       0.253930       0.135000       0.092600   -9999.000000   -9999.000000
53859     53859     shanxi         110.6667       36.1000           96       163     2012      11        09        314              0.210792       6.964661       1.347680       0.253613       0.149000   -9999.000000       0.083200       0.324000
53859     53859     shanxi         110.6667       36.1000           96       163     2012      11        10        315              0.235292       5.292877       1.844315       0.262298       0.136000       0.312500       0.070900   -9999.000000
53859     53859     shanxi         110.6667       36.1000           96       163     2012      11        11        316              0.229208       2.769714       0.000000       0.253040       0.138000       0.014300       0.079800       0.259000
53859     53859     shanxi         110.6667       36.1000           96       163     2012      11        12        317              0.223542       2.653412       0.000000       0.242826       0.123000   -9999.000000       0.073800       0.375000
53859     53859     shanxi         110.6667       36.1000           96       163     2012      11        13        318              0.000000       3.819916       0.000000       0.248968   -9999.000000       0.065300   -9999.000000   -9999.000000
53859     53859     shanxi         110.6667       36.1000           96       163     2012      11        14        319              0.217478       4.408081       0.000000       0.247296       0.121000   -9999.000000   -9999.000000       0.276000
53859     53859     shanxi         110.6667       36.1000           96       163     2012      11        15        320              0.222833       5.176483       0.163148       0.253768   -9999.000000   -9999.000000       0.063900   -9999.000000
53859     53859     shanxi         110.6667       36.1000           96       163     2012      11        16        321              0.236292       2.805573       0.425938       0.252181       0.130000       0.206500       0.073100       0.406000
53859     53859     shanxi         110.6667       36.1000           96       163     2012      11        17        322              0.000000       3.395508       0.000000       0.244833       0.126000   -9999.000000       0.070400   -9999.000000
53859     53859     shanxi         110.6667       36.1000           96       163     2012      11        18        323              0.238042       5.194794       0.000000       0.250665       0.125000   -9999.000000       0.071400       0.520000
53859     53859     shanxi         110.6667       36.1000           96       163     2012      11        19        324              0.233375       4.864929       0.035980       0.247903       0.127000   -9999.000000   -9999.000000       0.462000
53859     53859     shanxi         110.6667       36.1000           96       163     2012      11        20        325              0.235167       5.142944       0.000000       0.251899       0.126500   -9999.000000       0.067900   -9999.000000
53859     53859     shanxi         110.6667       36.1000           96       163     2012      11        21        326              0.232458       4.533478       0.000000       0.255087       0.105500       0.092400       0.063100       0.347000
53859     53859     shanxi         110.6667       36.1000           96       163     2012      11        22        327              0.227125       5.530640       0.000000       0.254548       0.108000   -9999.000000       0.062100   -9999.000000
53859     53859     shanxi         110.6667       36.1000           96       163     2012      11        23        328              0.221250       3.030457       0.000000       0.241303       0.104000       0.285700       0.059200       0.307000
53859     53859     shanxi         110.6667       36.1000           96       163     2012      11        24        329              0.216417       2.425842       0.036225       0.223500       0.107000       0.139400       0.059700       0.273000
53859     53859     shanxi         110.6667       36.1000           96       163     2012      11        25        330              0.215083       3.060638       0.000000       0.238745   -9999.000000   -9999.000000   -9999.000000       0.325000
53859     53859     shanxi         110.6667       36.1000           96       163     2012      11        26        331              0.203500       1.972015       0.359664       0.223731       0.096000       0.074900   -9999.000000       0.149000
53859     53859     shanxi         110.6667       36.1000           96       163     2012      11        27        332              0.199750       1.286407       0.000000       0.209354       0.111000   -9999.000000       0.059900   -9999.000000
53859     53859     shanxi         110.6667       36.1000           96       163     2012      11        28        333              0.187292       2.805542       0.000000       0.225662       0.099000       0.248000       0.049200       0.102000
53859     53859     shanxi         110.6667       36.1000           96       163     2012      11        29        334              0.162625       0.038879       0.000000       0.198929   -9999.000000       0.010500       0.053100       0.005000
53859     53859     shanxi         110.6667       36.1000           96       163     2012      11        30        335              0.155125      -0.355377       0.041879       0.189759   -9999.000000   -9999.000000   -9999.000000       0.132000
53859     53859     shanxi         110.6667       36.1000           96       163     2012      12        01        336              0.163542       0.936646       0.423548       0.203750   -9999.000000       0.025500       0.056000       0.109000
53859     53859     shanxi         110.6667       36.1000           96       163     2012      12        02        337              0.171167      -0.413757       0.000000       0.190995       0.093000   -9999.000000       0.050100   -9999.000000
53859     53859     shanxi         110.6667       36.1000           96       163     2012      12        03        338              0.165833       0.606354       0.000000       0.204642       0.103000       0.103600       0.060400       0.004000
53859     53859     shanxi         110.6667       36.1000           96       163     2012      12        04        339              0.159375       0.234131       0.000000       0.196470       0.108000       0.066200       0.053600       0.125000
53859     53859     shanxi         110.6667       36.1000           96       163     2012      12        05        340              0.143792       1.373169       0.000000       0.208657   -9999.000000   -9999.000000       0.053400       0.113000
53859     53859     shanxi         110.6667       36.1000           96       163     2012      12        06        341              0.144958      -0.303345       0.000000       0.189946   -9999.000000       0.335800   -9999.000000       0.075000
53859     53859     shanxi         110.6667       36.1000           96       163     2012      12        07        342              0.139250       0.996216       0.000000       0.205598       0.096000       0.143600       0.053900   -9999.000000
53859     53859     shanxi         110.6667       36.1000           96       163     2012      12        08        343              0.122292       0.268707       0.000000       0.196460       0.101000       0.151900       0.049200       0.020000
53859     53859     shanxi         110.6667       36.1000           96       163     2012      12        09        344              0.118708      -2.193420       0.000000       0.172036       0.102000       0.114500       0.054600   -9999.000000
53859     53859     shanxi         110.6667       36.1000           96       163     2012      12        10        345              0.119125      -1.183472       0.000000       0.177799   -9999.000000   -9999.000000       0.048100       0.005000
53859     53859     shanxi         110.6667       36.1000           96       163     2012      12        11        346              0.116500      -0.590302       0.000000       0.183989   -9999.000000       0.276200       0.045000   -9999.000000
53859     53859     shanxi         110.6667       36.1000           96       163     2012      12        12        347              0.116375      -0.890289       0.000000       0.181453       0.084000       0.052900   -9999.000000   -9999.000000
53859     53859     shanxi         110.6667       36.1000           96       163     2012      12        13        348              0.118167      -0.529846       0.000000       0.182601       0.102000   -9999.000000       0.051000       0.031000
53859     53859     shanxi         110.6667       36.1000           96       163     2012      12        14        349              0.120875      -1.046936       0.000000       0.175708   -9999.000000   -9999.000000       0.053500   -9999.000000
53859     53859     shanxi         110.6667       36.1000           96       163     2012      12        15        350              0.000000      -0.612518       0.000000       0.184245   -9999.000000   -9999.000000       0.055000       0.263000
53859     53859     shanxi         110.6667       36.1000           96       163     2012      12        16        351              0.126208      -0.395905       0.000000       0.184081   -9999.000000   -9999.000000       0.052600   -9999.000000
53859     53859     shanxi         110.6667       36.1000           96       163     2012      12        17        352              0.122500      -0.455658       0.000000       0.184305   -9999.000000       0.024800   -9999.000000       0.209000
53859     53859     shanxi         110.6667       36.1000           96       163     2012      12        18        353              0.116917      -1.067078       0.000000       0.182417       0.089000   -9999.000000       0.054900       0.015000
53859     53859     shanxi         110.6667       36.1000           96       163     2012      12        19        354              0.116500      -1.106537       0.000000       0.179627   -9999.000000       0.035500       0.047400   -9999.000000
53859     53859     shanxi         110.6667       36.1000           96       163     2012      12        20        355              0.000000      -1.364380       0.587802       0.172265   -9999.000000       0.112600       0.052600       0.051000
53859     53859     shanxi         110.6667       36.1000           96       163     2012      12        21        356              0.114958      -3.047485       0.000000       0.154717   -9999.000000       0.124300       0.050200   -9999.000000
53859     53859     shanxi         110.6667       36.1000           96       163     2012      12        22        357              0.111583      -3.892883       0.000000       0.152872   -9999.000000       0.031800       0.047400   -9999.000000
53859     53859     shanxi         110.6667       36.1000           96       163     2012      12        23        358              0.107000      -6.845581       0.000000       0.137662   -9999.000000   -9999.000000   -9999.000000   -9999.000000
53859     53859     shanxi         110.6667       36.1000           96       163     2012      12        24        359              0.107000      -7.955139       0.000000       0.131678       0.091000       0.050300       0.046900       0.011000
53859     53859     shanxi         110.6667       36.1000           96       163     2012      12        25        360              0.107000      -5.290161       0.000000       0.142144       0.095000   -9999.000000       0.046400       0.022000
53859     53859     shanxi         110.6667       36.1000           96       163     2012      12        26        361              0.000000      -5.195038       0.000000       0.143948   -9999.000000       0.166200       0.047300   -9999.000000
53859     53859     shanxi         110.6667       36.1000           96       163     2012      12        27        362              0.108769      -4.046661       0.000000       0.147843   -9999.000000       0.050600       0.048400       0.002000
53859     53859     shanxi         110.6667       36.1000           96       163     2012      12        28        363              0.108000      -3.381836       0.000000       0.156770   -9999.000000   -9999.000000       0.050800       0.004000
53859     53859     shanxi         110.6667       36.1000           96       163     2012      12        29        364              0.000000      -4.322571       0.000000       0.147563   -9999.000000       0.134300   -9999.000000   -9999.000000
53859     53859     shanxi         110.6667       36.1000           96       163     2012      12        30        365              0.000000      -7.706726       0.000000       0.134667       0.095000       0.031600       0.034900   -9999.000000
53859     53859     shanxi         110.6667       36.1000           96       163     2012      12        31        366              0.105400      -6.200897       0.027894       0.137837   -9999.000000       0.183600       0.039600   -9999.000000
