# Supplementary material for: Research on Fusing Multisatellite Soil Moisture Data Based on Bayesian Model Averaging
Source: Hindawi journal article supplement (doi:10.1155/2018/9310838), 2018-06-25
Supplement: f1 [file 9310838.f1.zip › 2012_sm00-10cm_daily_ZDB_ZHY_53863_366days_allin.txt]

53863     53863     shanxi         111.9167       37.0333           92       168     2012      01        01        001              0.000000   -9999.000000       0.000000   -9999.000000   -9999.000000   -9999.000000       0.036500   -9999.000000
53863     53863     shanxi         111.9167       37.0333           92       168     2012      01        02        002              0.160833      -2.045532       0.000000       0.190718   -9999.000000   -9999.000000       0.039800       0.221000
53863     53863     shanxi         111.9167       37.0333           92       168     2012      01        03        003              0.000000      -3.055969       0.000000       0.184414   -9999.000000   -9999.000000   -9999.000000       0.116000
53863     53863     shanxi         111.9167       37.0333           92       168     2012      01        04        004              0.155042      -5.208954       1.246052       0.169252   -9999.000000   -9999.000000       0.032100   -9999.000000
53863     53863     shanxi         111.9167       37.0333           92       168     2012      01        05        005              0.152292      -5.632324       0.688665       0.169022   -9999.000000   -9999.000000       0.042500       0.176000
53863     53863     shanxi         111.9167       37.0333           92       168     2012      01        06        006              0.151458      -5.509186       0.000000       0.166242   -9999.000000   -9999.000000       0.036000   -9999.000000
53863     53863     shanxi         111.9167       37.0333           92       168     2012      01        07        007              0.154500      -4.346344       0.000000       0.172974   -9999.000000   -9999.000000       0.033900       0.246000
53863     53863     shanxi         111.9167       37.0333           92       168     2012      01        08        008              0.000000      -3.552704       0.000000       0.174887   -9999.000000   -9999.000000       0.040900       0.100000
53863     53863     shanxi         111.9167       37.0333           92       168     2012      01        09        009              0.154625      -3.611572       0.000000       0.177163   -9999.000000   -9999.000000   -9999.000000       0.113000
53863     53863     shanxi         111.9167       37.0333           92       168     2012      01        10        010              0.155292      -1.857391       0.000000       0.194400   -9999.000000   -9999.000000       0.027200       0.131000
53863     53863     shanxi         111.9167       37.0333           92       168     2012      01        11        011              0.152208      -1.765747       0.000000       0.202257   -9999.000000   -9999.000000       0.040900   -9999.000000
53863     53863     shanxi         111.9167       37.0333           92       168     2012      01        12        012              0.152125      -3.244202       0.000000       0.186167       0.073000   -9999.000000       0.032200       0.241000
53863     53863     shanxi         111.9167       37.0333           92       168     2012      01        13        013              0.152708      -2.567139       0.000000       0.191649   -9999.000000   -9999.000000       0.035500   -9999.000000
53863     53863     shanxi         111.9167       37.0333           92       168     2012      01        14        014              0.152000      -2.127716       0.107292       0.192646   -9999.000000   -9999.000000   -9999.000000       0.170000
53863     53863     shanxi         111.9167       37.0333           92       168     2012      01        15        015              0.151125      -2.523560       0.000000       0.191210   -9999.000000   -9999.000000       0.039400       0.231000
53863     53863     shanxi         111.9167       37.0333           92       168     2012      01        16        016              0.149458      -2.387115       0.000000       0.193059   -9999.000000   -9999.000000       0.036700       0.187000
53863     53863     shanxi         111.9167       37.0333           92       168     2012      01        17        017              0.000000      -3.224274       0.000000       0.180079   -9999.000000   -9999.000000       0.040300       0.302000
53863     53863     shanxi         111.9167       37.0333           92       168     2012      01        18        018              0.152000      -1.440063       0.000000       0.199342   -9999.000000       0.020300       0.036400   -9999.000000
53863     53863     shanxi         111.9167       37.0333           92       168     2012      01        19        019              0.153292      -1.369049       0.000000       0.202302   -9999.000000   -9999.000000       0.036200       0.153000
53863     53863     shanxi         111.9167       37.0333           92       168     2012      01        20        020              0.155042      -0.813202       0.000000       0.205046   -9999.000000   -9999.000000   -9999.000000       0.280000
53863     53863     shanxi         111.9167       37.0333           92       168     2012      01        21        021              0.153875      -3.411896       0.000000       0.179415   -9999.000000   -9999.000000       0.027200       0.160000
53863     53863     shanxi         111.9167       37.0333           92       168     2012      01        22        022              0.151250      -6.422852       0.000000       0.161655   -9999.000000   -9999.000000       0.034900       0.194000
53863     53863     shanxi         111.9167       37.0333           92       168     2012      01        23        023              0.149250      -6.697266       0.000000       0.157134   -9999.000000   -9999.000000       0.031600   -9999.000000
53863     53863     shanxi         111.9167       37.0333           92       168     2012      01        24        024              0.147500      -6.613800       0.000000       0.156767   -9999.000000   -9999.000000   -9999.000000       0.194000
53863     53863     shanxi         111.9167       37.0333           92       168     2012      01        25        025              0.147625      -7.232819       0.078965       0.154450   -9999.000000   -9999.000000   -9999.000000       0.241000
53863     53863     shanxi         111.9167       37.0333           92       168     2012      01        26        026              0.149833      -4.531952       0.000000       0.172035   -9999.000000   -9999.000000       0.037400       0.199000
53863     53863     shanxi         111.9167       37.0333           92       168     2012      01        27        027              0.150000      -1.775452       0.000000       0.197600   -9999.000000   -9999.000000       0.028700       0.200000
53863     53863     shanxi         111.9167       37.0333           92       168     2012      01        28        028              0.152125      -1.649139       0.000000       0.198550       0.095000   -9999.000000       0.042100   -9999.000000
53863     53863     shanxi         111.9167       37.0333           92       168     2012      01        29        029              0.153125      -0.226807       0.000000       0.211413       0.091000   -9999.000000       0.037400       0.214000
53863     53863     shanxi         111.9167       37.0333           92       168     2012      01        30        030              0.153917      -0.735565       0.000000       0.208176   -9999.000000       0.041300       0.038600       0.335000
53863     53863     shanxi         111.9167       37.0333           92       168     2012      01        31        031              0.158958       0.524933       0.000000       0.216939   -9999.000000   -9999.000000   -9999.000000       0.252000
53863     53863     shanxi         111.9167       37.0333           92       168     2012      02        01        032              0.155542       1.686066       0.000000       0.227638   -9999.000000   -9999.000000       0.037600       0.226000
53863     53863     shanxi         111.9167       37.0333           92       168     2012      02        02        033              0.151750      -1.866333       0.000000       0.200385       0.082000   -9999.000000       0.034200   -9999.000000
53863     53863     shanxi         111.9167       37.0333           92       168     2012      02        03        034              0.153667      -2.197083       0.000000       0.194015       0.088000   -9999.000000       0.033900       0.244000
53863     53863     shanxi         111.9167       37.0333           92       168     2012      02        04        035              0.156208      -0.054871       0.000000       0.209323   -9999.000000   -9999.000000       0.035300   -9999.000000
53863     53863     shanxi         111.9167       37.0333           92       168     2012      02        05        036              0.158833      -0.052185       0.000000       0.211162   -9999.000000   -9999.000000       0.043600       0.341000
53863     53863     shanxi         111.9167       37.0333           92       168     2012      02        06        037              0.158083       1.462982       0.000000       0.225129   -9999.000000   -9999.000000   -9999.000000       0.157000
53863     53863     shanxi         111.9167       37.0333           92       168     2012      02        07        038              0.152125      -2.347229       0.000000       0.199418   -9999.000000   -9999.000000       0.027300       0.202000
53863     53863     shanxi         111.9167       37.0333           92       168     2012      02        08        039              0.149000      -3.805389       0.118709       0.182488   -9999.000000   -9999.000000       0.044700       0.266000
53863     53863     shanxi         111.9167       37.0333           92       168     2012      02        09        040              0.149417      -4.980743       0.000000       0.168809   -9999.000000   -9999.000000       0.035700   -9999.000000
53863     53863     shanxi         111.9167       37.0333           92       168     2012      02        10        041              0.151750      -3.687836       0.000000       0.177039   -9999.000000   -9999.000000       0.036600       0.328000
53863     53863     shanxi         111.9167       37.0333           92       168     2012      02        11        042              0.153250      -1.749329       0.000000       0.196615   -9999.000000   -9999.000000   -9999.000000   -9999.000000
53863     53863     shanxi         111.9167       37.0333           92       168     2012      02        12        043              0.155208      -0.076630       0.000000       0.206739   -9999.000000   -9999.000000   -9999.000000       0.121000
53863     53863     shanxi         111.9167       37.0333           92       168     2012      02        13        044              0.154208      -0.248047       0.000000       0.209994   -9999.000000   -9999.000000   -9999.000000       0.303000
53863     53863     shanxi         111.9167       37.0333           92       168     2012      02        14        045              0.155417       0.201965       0.000000       0.213442   -9999.000000   -9999.000000       0.045500       0.352000
53863     53863     shanxi         111.9167       37.0333           92       168     2012      02        15        046              0.157000       0.872070       0.000000       0.218927   -9999.000000   -9999.000000       0.036800       0.417000
53863     53863     shanxi         111.9167       37.0333           92       168     2012      02        16        047              0.155667       0.742096       0.000000       0.217453   -9999.000000   -9999.000000       0.036500   -9999.000000
53863     53863     shanxi         111.9167       37.0333           92       168     2012      02        17        048              0.154958      -0.808319       0.000000       0.204543       0.068000   -9999.000000   -9999.000000       0.240000
53863     53863     shanxi         111.9167       37.0333           92       168     2012      02        18        049              0.155250      -1.345886       0.282292       0.199783       0.078000   -9999.000000       0.038000       0.361000
53863     53863     shanxi         111.9167       37.0333           92       168     2012      02        19        050              0.155500      -1.153687       0.000000       0.200135       0.075000   -9999.000000       0.045600       0.279000
53863     53863     shanxi         111.9167       37.0333           92       168     2012      02        20        051              0.158000       0.038574       0.000000       0.204734       0.076000   -9999.000000       0.037700       0.285000
53863     53863     shanxi         111.9167       37.0333           92       168     2012      02        21        052              0.162042       1.757660       0.000000       0.216807   -9999.000000   -9999.000000   -9999.000000   -9999.000000
53863     53863     shanxi         111.9167       37.0333           92       168     2012      02        22        053              0.172875       3.475494       0.000000       0.226201   -9999.000000   -9999.000000       0.050200       0.436000
53863     53863     shanxi         111.9167       37.0333           92       168     2012      02        23        054              0.188458       5.260162       0.000000       0.234962       0.065000       0.034500   -9999.000000       0.454000
53863     53863     shanxi         111.9167       37.0333           92       168     2012      02        24        055              0.205875       2.815125       0.200051       0.227630       0.078000   -9999.000000       0.029900       0.449000
53863     53863     shanxi         111.9167       37.0333           92       168     2012      02        25        056              0.207458       2.626648       0.000000       0.228638   -9999.000000   -9999.000000       0.045100       0.265000
53863     53863     shanxi         111.9167       37.0333           92       168     2012      02        26        057              0.221870      -0.256104       0.254059       0.208990   -9999.000000       0.019900       0.043400   -9999.000000
53863     53863     shanxi         111.9167       37.0333           92       168     2012      02        27        058              0.228333       1.910522       0.169871       0.220720   -9999.000000   -9999.000000   -9999.000000       0.321000
53863     53863     shanxi         111.9167       37.0333           92       168     2012      02        28        059              0.230167       3.256348       0.000000       0.227611       0.066000   -9999.000000   -9999.000000       0.430000
53863     53863     shanxi         111.9167       37.0333           92       168     2012      02        29        060              0.000000   -9999.000000       0.000000   -9999.000000       0.076000   -9999.000000   -9999.000000   -9999.000000
53863     53863     shanxi         111.9167       37.0333           92       168     2012      03        01        061              0.232500       3.209595       0.000000       0.229524   -9999.000000   -9999.000000       0.040000       0.455000
53863     53863     shanxi         111.9167       37.0333           92       168     2012      03        02        062              0.235208       2.882660       0.256147       0.234638   -9999.000000       0.023200       0.052500   -9999.000000
53863     53863     shanxi         111.9167       37.0333           92       168     2012      03        03        063              0.239042       2.172028       0.601402       0.236338   -9999.000000   -9999.000000       0.042900       0.510000
53863     53863     shanxi         111.9167       37.0333           92       168     2012      03        04        064              0.249833       1.279816       0.000000       0.226457   -9999.000000   -9999.000000       0.050200   -9999.000000
53863     53863     shanxi         111.9167       37.0333           92       168     2012      03        05        065              0.257958       2.195038       0.000000       0.231937       0.107000   -9999.000000   -9999.000000       0.451000
53863     53863     shanxi         111.9167       37.0333           92       168     2012      03        06        066              0.248750       3.463226       0.060563       0.229244       0.104000   -9999.000000       0.042500       0.277000
53863     53863     shanxi         111.9167       37.0333           92       168     2012      03        07        067              0.000000       2.939484       1.729020       0.224892       0.098000       0.067900       0.053300       0.443000
53863     53863     shanxi         111.9167       37.0333           92       168     2012      03        08        068              0.250542       5.064789       0.446171       0.233539   -9999.000000   -9999.000000       0.055300       0.510000
53863     53863     shanxi         111.9167       37.0333           92       168     2012      03        09        069              0.256833       4.690155       0.000000       0.234514       0.096000   -9999.000000       0.054500   -9999.000000
53863     53863     shanxi         111.9167       37.0333           92       168     2012      03        10        070              0.259542       5.431122       0.000000       0.236856       0.092000   -9999.000000       0.055500       0.520000
53863     53863     shanxi         111.9167       37.0333           92       168     2012      03        11        071              0.256917       6.357513       0.000000       0.228122       0.090000   -9999.000000   -9999.000000   -9999.000000
53863     53863     shanxi         111.9167       37.0333           92       168     2012      03        12        072              0.257417       5.178040       0.000000       0.225128       0.090000       0.095900       0.030200       0.469000
53863     53863     shanxi         111.9167       37.0333           92       168     2012      03        13        073              0.257500       6.846283       0.000000       0.226727   -9999.000000   -9999.000000       0.055800       0.562000
53863     53863     shanxi         111.9167       37.0333           92       168     2012      03        14        074              0.257130       9.184967       0.000000       0.223273   -9999.000000       0.269400   -9999.000000       0.539000
53863     53863     shanxi         111.9167       37.0333           92       168     2012      03        15        075              0.257167       8.041962       0.125448       0.219503   -9999.000000       0.061700       0.064600       0.660000
53863     53863     shanxi         111.9167       37.0333           92       168     2012      03        16        076              0.258125       3.903229       3.827575       0.223682       0.091000   -9999.000000   -9999.000000   -9999.000000
53863     53863     shanxi         111.9167       37.0333           92       168     2012      03        17        077              0.256083       9.975830       0.000000       0.223344       0.086000       0.007500       0.057000       0.552000
53863     53863     shanxi         111.9167       37.0333           92       168     2012      03        18        078              0.253042      11.442596       0.000000       0.218336   -9999.000000   -9999.000000       0.056200       0.588000
53863     53863     shanxi         111.9167       37.0333           92       168     2012      03        19        079              0.255667       8.166992       0.321944       0.215520   -9999.000000   -9999.000000       0.076300       0.592000
53863     53863     shanxi         111.9167       37.0333           92       168     2012      03        20        080              0.256917       3.444122       0.000000       0.224058       0.077000       0.150700       0.061800       0.590000
53863     53863     shanxi         111.9167       37.0333           92       168     2012      03        21        081              0.256500       7.477570       0.122209       0.227549   -9999.000000   -9999.000000       0.067600   -9999.000000
53863     53863     shanxi         111.9167       37.0333           92       168     2012      03        22        082              0.267875       4.714478       0.385880       0.230608       0.107000       0.089100   -9999.000000       0.817000
53863     53863     shanxi         111.9167       37.0333           92       168     2012      03        23        083              0.260625       5.940491       0.349742       0.237535   -9999.000000   -9999.000000       0.048200       0.554000
53863     53863     shanxi         111.9167       37.0333           92       168     2012      03        24        084              0.254875       7.304688       0.000000       0.228360   -9999.000000   -9999.000000   -9999.000000       0.629000
53863     53863     shanxi         111.9167       37.0333           92       168     2012      03        25        085              0.000000      10.451752       0.000000       0.217974       0.080000       0.045400       0.053900       0.476000
53863     53863     shanxi         111.9167       37.0333           92       168     2012      03        26        086              0.246125      12.878540       0.000000       0.208295       0.091000   -9999.000000       0.055600   -9999.000000
53863     53863     shanxi         111.9167       37.0333           92       168     2012      03        27        087              0.241250      13.782532       0.000000       0.199721       0.081000   -9999.000000       0.055600       0.426000
53863     53863     shanxi         111.9167       37.0333           92       168     2012      03        28        088              0.236417      14.537689       0.257667       0.193204       0.086000   -9999.000000   -9999.000000       0.527000
53863     53863     shanxi         111.9167       37.0333           92       168     2012      03        29        089              0.233542      14.584351       0.909302       0.193879   -9999.000000   -9999.000000       0.040200       0.537000
53863     53863     shanxi         111.9167       37.0333           92       168     2012      03        30        090              0.226917      15.103180       0.894839       0.193139       0.081000       0.028000       0.065100       0.373000
53863     53863     shanxi         111.9167       37.0333           92       168     2012      03        31        091              0.222500      10.524384       4.335233       0.191738       0.073000   -9999.000000       0.051700   -9999.000000
53863     53863     shanxi         111.9167       37.0333           92       168     2012      04        01        092              0.217750      14.244751       0.000000       0.188336       0.088000   -9999.000000       0.052600       0.353000
53863     53863     shanxi         111.9167       37.0333           92       168     2012      04        02        093              0.212458      14.647217       0.130377       0.185918       0.090000       0.074700   -9999.000000   -9999.000000
53863     53863     shanxi         111.9167       37.0333           92       168     2012      04        03        094              0.210500       9.829437       0.000000       0.188400   -9999.000000   -9999.000000       0.055400       0.431000
53863     53863     shanxi         111.9167       37.0333           92       168     2012      04        04        095              0.205917      13.441345       0.000000       0.185518   -9999.000000   -9999.000000       0.052000       0.429000
53863     53863     shanxi         111.9167       37.0333           92       168     2012      04        05        096              0.200583      16.109802       0.000000       0.181615       0.080000   -9999.000000       0.069300       0.458000
53863     53863     shanxi         111.9167       37.0333           92       168     2012      04        06        097              0.195458      16.129303       0.000000       0.179706       0.091000   -9999.000000       0.047600       0.377000
53863     53863     shanxi         111.9167       37.0333           92       168     2012      04        07        098              0.190667      17.744446       0.000000       0.178259       0.082000       0.077700       0.057200   -9999.000000
53863     53863     shanxi         111.9167       37.0333           92       168     2012      04        08        099              0.185833      18.950226       0.000000       0.176737   -9999.000000   -9999.000000   -9999.000000       0.457000
53863     53863     shanxi         111.9167       37.0333           92       168     2012      04        09        100              0.181583      20.236542       0.262400       0.175926       0.095000   -9999.000000       0.049800   -9999.000000
53863     53863     shanxi         111.9167       37.0333           92       168     2012      04        10        101              0.178083      19.478119       0.956576       0.178296       0.070000   -9999.000000       0.065500       0.457000
53863     53863     shanxi         111.9167       37.0333           92       168     2012      04        11        102              0.177208      17.820221       5.806587       0.191377       0.098000   -9999.000000       0.050000       0.715000
53863     53863     shanxi         111.9167       37.0333           92       168     2012      04        12        103              0.190375      15.817383       0.718674       0.220934       0.109000       0.086100       0.071400       0.743000
53863     53863     shanxi         111.9167       37.0333           92       168     2012      04        13        104              0.193375      14.488007       0.000000       0.245067   -9999.000000   -9999.000000       0.055600       0.494000
53863     53863     shanxi         111.9167       37.0333           92       168     2012      04        14        105              0.189958      17.824493       0.000000       0.219536   -9999.000000   -9999.000000       0.062200   -9999.000000
53863     53863     shanxi         111.9167       37.0333           92       168     2012      04        15        106              0.185958      17.691833       0.000000       0.205082       0.080000   -9999.000000       0.044800       0.502000
53863     53863     shanxi         111.9167       37.0333           92       168     2012      04        16        107              0.181083      20.321655       0.000000       0.193228       0.091000   -9999.000000       0.068000       0.434000
53863     53863     shanxi         111.9167       37.0333           92       168     2012      04        17        108              0.177250      20.076874       0.000000       0.185548       0.095000       0.113900       0.054100       0.504000
53863     53863     shanxi         111.9167       37.0333           92       168     2012      04        18        109              0.173292      20.536926       0.118808       0.182071       0.094000   -9999.000000   -9999.000000       0.757000
53863     53863     shanxi         111.9167       37.0333           92       168     2012      04        19        110              0.170208      21.312286       0.000000       0.181214   -9999.000000   -9999.000000   -9999.000000   -9999.000000
53863     53863     shanxi         111.9167       37.0333           92       168     2012      04        20        111              0.167042      20.559082       3.062906       0.179395   -9999.000000       0.019700       0.063800       0.475000
53863     53863     shanxi         111.9167       37.0333           92       168     2012      04        21        112              0.165625      18.846161       0.000000       0.179332       0.090500   -9999.000000       0.054000       0.507000
53863     53863     shanxi         111.9167       37.0333           92       168     2012      04        22        113              0.162783      21.489777       0.936719       0.177796       0.090000   -9999.000000       0.068300       0.466000
53863     53863     shanxi         111.9167       37.0333           92       168     2012      04        23        114              0.161125      23.116272       2.951587       0.183706       0.090000   -9999.000000       0.057500       0.413000
53863     53863     shanxi         111.9167       37.0333           92       168     2012      04        24        115              0.193625      25.458801       0.298717       0.191032   -9999.000000   -9999.000000       0.092300   -9999.000000
53863     53863     shanxi         111.9167       37.0333           92       168     2012      04        25        116              0.000000      15.852173       0.000000       0.221057   -9999.000000       0.243700   -9999.000000       0.616000
53863     53863     shanxi         111.9167       37.0333           92       168     2012      04        26        117              0.202750      16.421906       0.000000       0.198361       0.093000   -9999.000000       0.055700       0.487000
53863     53863     shanxi         111.9167       37.0333           92       168     2012      04        27        118              0.194667      21.227570       0.000000       0.184129       0.087500   -9999.000000   -9999.000000       0.437000
53863     53863     shanxi         111.9167       37.0333           92       168     2012      04        28        119              0.187750      22.657501       0.110391       0.176633       0.081000   -9999.000000       0.054200       0.383000
53863     53863     shanxi         111.9167       37.0333           92       168     2012      04        29        120              0.181667      22.380524       0.000000       0.174731       0.094000   -9999.000000       0.056700   -9999.000000
53863     53863     shanxi         111.9167       37.0333           92       168     2012      04        30        121              0.175875      24.137604       0.000000       0.173760       0.096000       0.077000   -9999.000000       0.399000
53863     53863     shanxi         111.9167       37.0333           92       168     2012      05        01        122              0.170917      25.882172       0.113849       0.173171       0.115500   -9999.000000       0.062300   -9999.000000
53863     53863     shanxi         111.9167       37.0333           92       168     2012      05        02        123              0.165333      24.058441       0.000000       0.174957       0.121000   -9999.000000       0.047000       0.455000
53863     53863     shanxi         111.9167       37.0333           92       168     2012      05        03        124              0.161333      25.825470       0.000000       0.172636       0.110000   -9999.000000       0.064900       0.399000
53863     53863     shanxi         111.9167       37.0333           92       168     2012      05        04        125              0.158000      26.597412       0.000000       0.170687       0.102000   -9999.000000       0.050200       0.449000
53863     53863     shanxi         111.9167       37.0333           92       168     2012      05        05        126              0.154458      28.222565       0.319523       0.168959       0.114000   -9999.000000       0.052000       0.351000
53863     53863     shanxi         111.9167       37.0333           92       168     2012      05        06        127              0.151458      28.609924       0.000000       0.168309       0.103000   -9999.000000   -9999.000000   -9999.000000
53863     53863     shanxi         111.9167       37.0333           92       168     2012      05        07        128              0.150042      29.337860       0.000000       0.167469   -9999.000000       0.109000       0.050000       0.412000
53863     53863     shanxi         111.9167       37.0333           92       168     2012      05        08        129              0.149167      28.491486       2.151291       0.167624       0.110000       0.030700       0.048100   -9999.000000
53863     53863     shanxi         111.9167       37.0333           92       168     2012      05        09        130              0.147167      29.459229       0.000000       0.167395       0.096000   -9999.000000       0.058800       0.438000
53863     53863     shanxi         111.9167       37.0333           92       168     2012      05        10        131              0.146739      27.338745       0.000000       0.167982       0.108000   -9999.000000       0.040500       0.385000
53863     53863     shanxi         111.9167       37.0333           92       168     2012      05        11        132              0.144833      29.089783       1.663948       0.166932       0.164000   -9999.000000       0.062400       0.436000
53863     53863     shanxi         111.9167       37.0333           92       168     2012      05        12        133              0.144500      21.526550       0.000000       0.187729       0.116500       0.098800   -9999.000000       0.351000
53863     53863     shanxi         111.9167       37.0333           92       168     2012      05        13        134              0.144500      20.529907       0.000000       0.181158       0.122000       0.063200       0.034800   -9999.000000
53863     53863     shanxi         111.9167       37.0333           92       168     2012      05        14        135              0.144458      20.242157       0.000000       0.172499       0.117000   -9999.000000       0.057800       0.438000
53863     53863     shanxi         111.9167       37.0333           92       168     2012      05        15        136              0.144333      22.012573       0.000000       0.167937       0.112000   -9999.000000       0.046300       0.375000
53863     53863     shanxi         111.9167       37.0333           92       168     2012      05        16        137              0.143542      23.553314       0.069785       0.165993       0.110000   -9999.000000       0.053300       0.394000
53863     53863     shanxi         111.9167       37.0333           92       168     2012      05        17        138              0.142833      24.537872       0.000000       0.164943       0.107500       0.176400   -9999.000000       0.433000
53863     53863     shanxi         111.9167       37.0333           92       168     2012      05        18        139              0.142833      26.727936       0.080500       0.163837       0.124000       0.077700       0.056800   -9999.000000
53863     53863     shanxi         111.9167       37.0333           92       168     2012      05        19        140              0.142583      29.075836       0.394065       0.163602       0.119000   -9999.000000       0.042400       0.471000
53863     53863     shanxi         111.9167       37.0333           92       168     2012      05        20        141              0.141833      29.882019       0.404605       0.164198   -9999.000000   -9999.000000       0.053600       0.466000
53863     53863     shanxi         111.9167       37.0333           92       168     2012      05        21        142              0.140208      29.686127       0.812229       0.163865       0.159000   -9999.000000       0.049300       0.546000
53863     53863     shanxi         111.9167       37.0333           92       168     2012      05        22        143              0.140625      21.032013       0.000000       0.173320       0.126500   -9999.000000       0.046900       0.344000
53863     53863     shanxi         111.9167       37.0333           92       168     2012      05        23        144              0.140583      24.098663       0.130279       0.169769   -9999.000000   -9999.000000   -9999.000000   -9999.000000
53863     53863     shanxi         111.9167       37.0333           92       168     2012      05        24        145              0.140208      24.643738       0.000000       0.165527       0.137000   -9999.000000       0.048500       0.339000
53863     53863     shanxi         111.9167       37.0333           92       168     2012      05        25        146              0.000000      25.920959       0.000000       0.163259       0.126000   -9999.000000       0.056700       0.447000
53863     53863     shanxi         111.9167       37.0333           92       168     2012      05        26        147              0.139000      26.542847       0.406777       0.162396       0.125000       0.016900       0.041500       0.381000
53863     53863     shanxi         111.9167       37.0333           92       168     2012      05        27        148              0.139083      26.677948       0.000000       0.164868       0.115000   -9999.000000       0.043500       0.377000
53863     53863     shanxi         111.9167       37.0333           92       168     2012      05        28        149              0.138458      29.079071      11.962296       0.162023       0.107000   -9999.000000       0.045600   -9999.000000
53863     53863     shanxi         111.9167       37.0333           92       168     2012      05        29        150              0.158917      28.021698       1.262993       0.196134       0.161000   -9999.000000   -9999.000000       0.606000
53863     53863     shanxi         111.9167       37.0333           92       168     2012      05        30        151              0.166583      24.163635       0.239565       0.263401       0.131000       0.092900       0.041300   -9999.000000
53863     53863     shanxi         111.9167       37.0333           92       168     2012      05        31        152              0.167542      24.541260       0.259062       0.223075       0.163000       0.112100   -9999.000000   -9999.000000
53863     53863     shanxi         111.9167       37.0333           92       168     2012      06        01        153              0.166250      24.085144       6.167241       0.206235       0.133000   -9999.000000       0.054100       0.624000
53863     53863     shanxi         111.9167       37.0333           92       168     2012      06        02        154              0.163958      23.391876       0.659481       0.247211       0.102500   -9999.000000       0.054800       0.770000
53863     53863     shanxi         111.9167       37.0333           92       168     2012      06        03        155              0.162000      23.355194       0.000000       0.241079       0.118000   -9999.000000   -9999.000000       0.481000
53863     53863     shanxi         111.9167       37.0333           92       168     2012      06        04        156              0.159042      24.193817       0.166083       0.217837       0.107000       0.037000       0.065800   -9999.000000
53863     53863     shanxi         111.9167       37.0333           92       168     2012      06        05        157              0.154292      27.350159       0.266132       0.196945   -9999.000000       0.044100       0.060500       0.491000
53863     53863     shanxi         111.9167       37.0333           92       168     2012      06        06        158              0.150375      27.594635       0.131960       0.185941       0.129000   -9999.000000       0.074800   -9999.000000
53863     53863     shanxi         111.9167       37.0333           92       168     2012      06        07        159              0.148875      23.338776       2.015469       0.184174       0.131000   -9999.000000       0.061400       0.352000
53863     53863     shanxi         111.9167       37.0333           92       168     2012      06        08        160              0.146667      25.753052       0.000000       0.196563       0.122500   -9999.000000       0.057600       0.510000
53863     53863     shanxi         111.9167       37.0333           92       168     2012      06        09        161              0.144917      26.445404       0.254337       0.187738       0.109000   -9999.000000   -9999.000000       0.451000
53863     53863     shanxi         111.9167       37.0333           92       168     2012      06        10        162              0.142292      29.681641       0.000000       0.174477       0.113000   -9999.000000       0.055500       0.450000
53863     53863     shanxi         111.9167       37.0333           92       168     2012      06        11        163              0.000000      27.691589       0.000000       0.170317       0.102000   -9999.000000       0.080300   -9999.000000
53863     53863     shanxi         111.9167       37.0333           92       168     2012      06        12        164              0.139750      28.392456       0.000000       0.166816       0.096000   -9999.000000       0.064300       0.412000
53863     53863     shanxi         111.9167       37.0333           92       168     2012      06        13        165              0.138750      30.047180       0.062612       0.165146       0.107000   -9999.000000       0.068900       0.523000
53863     53863     shanxi         111.9167       37.0333           92       168     2012      06        14        166              0.138167      29.761200       0.000000       0.164395       0.117000   -9999.000000       0.073300       0.485000
53863     53863     shanxi         111.9167       37.0333           92       168     2012      06        15        167              0.137167      28.598877       0.000000       0.163595       0.119000       0.027000   -9999.000000       0.524000
53863     53863     shanxi         111.9167       37.0333           92       168     2012      06        16        168              0.136750      29.021790       0.000000       0.162817       0.107000   -9999.000000       0.052500   -9999.000000
53863     53863     shanxi         111.9167       37.0333           92       168     2012      06        17        169              0.136458      30.163147       0.000000       0.161732       0.115000       0.147600       0.079100       0.478000
53863     53863     shanxi         111.9167       37.0333           92       168     2012      06        18        170              0.136417      31.967712       0.438968       0.160808       0.106500       0.093000       0.072000       0.606000
53863     53863     shanxi         111.9167       37.0333           92       168     2012      06        19        171              0.135500      33.313904       2.553578       0.163263       0.119000   -9999.000000       0.070800       0.543000
53863     53863     shanxi         111.9167       37.0333           92       168     2012      06        20        172              0.135458      29.700653       0.765629       0.184696       0.108000   -9999.000000   -9999.000000       0.520000
53863     53863     shanxi         111.9167       37.0333           92       168     2012      06        21        173              0.135625      28.216736       0.254318       0.178310       0.121000   -9999.000000       0.083500   -9999.000000
53863     53863     shanxi         111.9167       37.0333           92       168     2012      06        22        174              0.136625      29.680542       0.775996       0.168458   -9999.000000   -9999.000000       0.087200       0.445000
53863     53863     shanxi         111.9167       37.0333           92       168     2012      06        23        175              0.136583      31.465942       0.406924       0.168067       0.124000       0.069500       0.088100       0.622000
53863     53863     shanxi         111.9167       37.0333           92       168     2012      06        24        176              0.141000      30.084747      10.057388       0.174708       0.159000   -9999.000000       0.088800       0.838000
53863     53863     shanxi         111.9167       37.0333           92       168     2012      06        25        177              0.144792      25.614929       0.241292       0.276341       0.147000   -9999.000000       0.113000       0.488000
53863     53863     shanxi         111.9167       37.0333           92       168     2012      06        26        178              0.146500      26.536285       1.031484       0.227635       0.133000   -9999.000000   -9999.000000   -9999.000000
53863     53863     shanxi         111.9167       37.0333           92       168     2012      06        27        179              0.146417      26.512726       0.753835       0.214748   -9999.000000   -9999.000000       0.117300       0.543000
53863     53863     shanxi         111.9167       37.0333           92       168     2012      06        28        180              0.148042      25.040985      24.353519       0.203159       0.148000       0.045300       0.141400   -9999.000000
53863     53863     shanxi         111.9167       37.0333           92       168     2012      06        29        181              0.252708      22.166962       5.121027       0.290568       0.161500   -9999.000000       0.133300       1.000000
53863     53863     shanxi         111.9167       37.0333           92       168     2012      06        30        182              0.250375      23.701508       0.000000       0.326894       0.133000   -9999.000000       0.116100   -9999.000000
53863     53863     shanxi         111.9167       37.0333           92       168     2012      07        01        183              0.236583      26.826080       0.000000       0.286523   -9999.000000       0.169100       0.107700       0.743000
53863     53863     shanxi         111.9167       37.0333           92       168     2012      07        02        184              0.223458      28.974426       0.000000       0.258313       0.120000   -9999.000000       0.121400       0.566000
53863     53863     shanxi         111.9167       37.0333           92       168     2012      07        03        185              0.210208      28.877258       0.000000       0.237463       0.098000       0.178900       0.096900   -9999.000000
53863     53863     shanxi         111.9167       37.0333           92       168     2012      07        04        186              0.198833      28.271881       0.449254       0.221508       0.125500   -9999.000000       0.129500       0.609000
53863     53863     shanxi         111.9167       37.0333           92       168     2012      07        05        187              0.191542      26.781921       0.451205       0.212266       0.122000   -9999.000000       0.108200   -9999.000000
53863     53863     shanxi         111.9167       37.0333           92       168     2012      07        06        188              0.181167      30.207825       0.000000       0.198795   -9999.000000       0.094800       0.105800       0.446000
53863     53863     shanxi         111.9167       37.0333           92       168     2012      07        07        189              0.171917      30.728516       0.550682       0.188790   -9999.000000   -9999.000000   -9999.000000       0.625000
53863     53863     shanxi         111.9167       37.0333           92       168     2012      07        08        190              0.255348      29.434357      46.752377       0.185073       0.193000       0.250300       0.158400       0.552000
53863     53863     shanxi         111.9167       37.0333           92       168     2012      07        09        191              0.340667      24.939941      22.761841       0.335429       0.176500   -9999.000000       0.184100       1.000000
53863     53863     shanxi         111.9167       37.0333           92       168     2012      07        10        192              0.309792      23.768402       0.205423       0.377982       0.149000   -9999.000000       0.203100   -9999.000000
53863     53863     shanxi         111.9167       37.0333           92       168     2012      07        11        193              0.281125      27.360046       0.000000       0.345782       0.142000       0.158800       0.164000       0.887000
53863     53863     shanxi         111.9167       37.0333           92       168     2012      07        12        194              0.258667      28.104034       0.000000       0.323931       0.143000   -9999.000000       0.151100       0.695000
53863     53863     shanxi         111.9167       37.0333           92       168     2012      07        13        195              0.253958      28.381226      11.820744       0.306993       0.154000   -9999.000000   -9999.000000       0.730000
53863     53863     shanxi         111.9167       37.0333           92       168     2012      07        14        196              0.270958      26.472900       4.495964       0.331769       0.136500   -9999.000000       0.142400       0.849000
53863     53863     shanxi         111.9167       37.0333           92       168     2012      07        15        197              0.290917      25.338959       7.709942       0.329966       0.166500   -9999.000000       0.196300   -9999.000000
53863     53863     shanxi         111.9167       37.0333           92       168     2012      07        16        198              0.277125      24.028717       0.027897       0.349807       0.164000       0.184700       0.160700       0.882000
53863     53863     shanxi         111.9167       37.0333           92       168     2012      07        17        199              0.263125      26.246735       0.000000       0.325663       0.146000   -9999.000000       0.156000       0.812000
53863     53863     shanxi         111.9167       37.0333           92       168     2012      07        18        200              0.251125      25.860779       0.000000       0.313160       0.145000   -9999.000000   -9999.000000       0.735000
53863     53863     shanxi         111.9167       37.0333           92       168     2012      07        19        201              0.239167      26.155701       0.000000       0.303195       0.131000       0.129100       0.160300       0.657000
53863     53863     shanxi         111.9167       37.0333           92       168     2012      07        20        202              0.230304      27.288483       1.042788       0.292984       0.132500       0.089700       0.147400   -9999.000000
53863     53863     shanxi         111.9167       37.0333           92       168     2012      07        21        203              0.237542      27.734589      12.295984       0.290811   -9999.000000       0.121900       0.181100       0.932000
53863     53863     shanxi         111.9167       37.0333           92       168     2012      07        22        204              0.249708      25.372467       0.000000       0.332069       0.166000   -9999.000000       0.145900       0.722000
53863     53863     shanxi         111.9167       37.0333           92       168     2012      07        23        205              0.235167      26.404541       1.288629       0.311727   -9999.000000       0.260100       0.143000       0.669000
53863     53863     shanxi         111.9167       37.0333           92       168     2012      07        24        206              0.244917      26.424255       5.256348       0.302313       0.188000       0.169800   -9999.000000       0.851000
53863     53863     shanxi         111.9167       37.0333           92       168     2012      07        25        207              0.249565      24.250214       0.633478       0.324715       0.167000   -9999.000000       0.156700   -9999.000000
53863     53863     shanxi         111.9167       37.0333           92       168     2012      07        26        208              0.242958      27.308838       4.257036       0.311494       0.182000       0.095000       0.159900       0.961000
53863     53863     shanxi         111.9167       37.0333           92       168     2012      07        27        209              0.238667      27.099487       0.000000       0.316350       0.164000   -9999.000000       0.169700   -9999.000000
53863     53863     shanxi         111.9167       37.0333           92       168     2012      07        28        210              0.227792      28.171631       0.297665       0.304853       0.174000       0.035100       0.142500       0.794000
53863     53863     shanxi         111.9167       37.0333           92       168     2012      07        29        211              0.213875      29.485931       0.526056       0.292831       0.174000       0.140900       0.132600   -9999.000000
53863     53863     shanxi         111.9167       37.0333           92       168     2012      07        30        212              0.220667      30.960754      48.636139       0.277007       0.139000   -9999.000000   -9999.000000       0.666000
53863     53863     shanxi         111.9167       37.0333           92       168     2012      07        31        213              0.351833      26.581665      35.859394       0.345006       0.223000   -9999.000000       0.179000       1.000000
53863     53863     shanxi         111.9167       37.0333           92       168     2012      08        01        214              0.328458      22.445190       0.000000       0.401066       0.190000   -9999.000000       0.207800   -9999.000000
53863     53863     shanxi         111.9167       37.0333           92       168     2012      08        02        215              0.309000      24.359344       0.073649       0.369770       0.185000   -9999.000000       0.173300       0.892000
53863     53863     shanxi         111.9167       37.0333           92       168     2012      08        03        216              0.291208      26.878815       0.074611       0.355165       0.179000       0.114100       0.176600   -9999.000000
53863     53863     shanxi         111.9167       37.0333           92       168     2012      08        04        217              0.274083      26.572479       1.438087       0.343538       0.179000   -9999.000000   -9999.000000       0.759000
53863     53863     shanxi         111.9167       37.0333           92       168     2012      08        05        218              0.262917      27.287903       2.505703       0.333581       0.177500   -9999.000000       0.182900       0.891000
53863     53863     shanxi         111.9167       37.0333           92       168     2012      08        06        219              0.254792      25.472443       0.000000       0.337880       0.181000       0.232100       0.180400       0.773000
53863     53863     shanxi         111.9167       37.0333           92       168     2012      08        07        220              0.253250      27.151306       0.311155       0.329577       0.174000   -9999.000000       0.149200       0.745000
53863     53863     shanxi         111.9167       37.0333           92       168     2012      08        08        221              0.246958      28.586792       2.108315       0.319703       0.214000       0.255500       0.171400   -9999.000000
53863     53863     shanxi         111.9167       37.0333           92       168     2012      08        09        222              0.255458      27.921051       0.506236       0.316794       0.178000   -9999.000000       0.188700       0.723000
53863     53863     shanxi         111.9167       37.0333           92       168     2012      08        10        223              0.255042      25.448669       0.000000       0.315637       0.144000       0.374600   -9999.000000       0.753000
53863     53863     shanxi         111.9167       37.0333           92       168     2012      08        11        224              0.248792      26.303253       3.847331       0.304150       0.187000       0.126100       0.206600       0.741000
53863     53863     shanxi         111.9167       37.0333           92       168     2012      08        12        225              0.247875      26.961395       0.133297       0.306752       0.193000   -9999.000000       0.217000       0.767000
53863     53863     shanxi         111.9167       37.0333           92       168     2012      08        13        226              0.244208      23.790894       1.465549       0.315135       0.194000   -9999.000000       0.199700   -9999.000000
53863     53863     shanxi         111.9167       37.0333           92       168     2012      08        14        227              0.294958      24.701538       9.485126       0.308770       0.203000   -9999.000000       0.220700       1.000000
53863     53863     shanxi         111.9167       37.0333           92       168     2012      08        15        228              0.286208      22.821014       0.000000       0.342542       0.181500   -9999.000000       0.220300       0.820000
53863     53863     shanxi         111.9167       37.0333           92       168     2012      08        16        229              0.269696      25.191498       0.279554       0.319468       0.150000       0.097000   -9999.000000       0.769000
53863     53863     shanxi         111.9167       37.0333           92       168     2012      08        17        230              0.312042      25.986115      37.718346       0.310497   -9999.000000   -9999.000000       0.199100       1.000000
53863     53863     shanxi         111.9167       37.0333           92       168     2012      08        18        231              0.341542      23.063202       5.338703       0.378263   -9999.000000       0.136100       0.268600   -9999.000000
53863     53863     shanxi         111.9167       37.0333           92       168     2012      08        19        232              0.319542      23.182068       1.605369       0.374553       0.196000   -9999.000000       0.223300       0.862000
53863     53863     shanxi         111.9167       37.0333           92       168     2012      08        20        233              0.305625      24.667053       0.493849       0.352477       0.173000       0.150900       0.269500       0.863000
53863     53863     shanxi         111.9167       37.0333           92       168     2012      08        21        234              0.291333      24.001984       0.000000       0.343593       0.148000       0.268900   -9999.000000       0.818000
53863     53863     shanxi         111.9167       37.0333           92       168     2012      08        22        235              0.277208      22.531036       0.000000       0.332984       0.174000   -9999.000000       0.254200   -9999.000000
53863     53863     shanxi         111.9167       37.0333           92       168     2012      08        23        236              0.266750      21.975800       0.000000       0.325233       0.178000   -9999.000000       0.233700   -9999.000000
53863     53863     shanxi         111.9167       37.0333           92       168     2012      08        24        237              0.257458      21.488983       0.000000       0.320494   -9999.000000       0.071600       0.281000       0.769000
53863     53863     shanxi         111.9167       37.0333           92       168     2012      08        25        238              0.000000      22.853180       0.000000       0.314582       0.182000   -9999.000000       0.224200   -9999.000000
53863     53863     shanxi         111.9167       37.0333           92       168     2012      08        26        239              0.242833      23.161072       0.000000       0.310834       0.172500       0.275800       0.239900       0.716000
53863     53863     shanxi         111.9167       37.0333           92       168     2012      08        27        240              0.236333      24.458466       1.268719       0.306294       0.175500   -9999.000000   -9999.000000   -9999.000000
53863     53863     shanxi         111.9167       37.0333           92       168     2012      08        28        241              0.229542      25.125000       2.782924       0.303406       0.179000   -9999.000000       0.185600       0.685000
53863     53863     shanxi         111.9167       37.0333           92       168     2012      08        29        242              0.221708      24.899933       0.000000       0.308664       0.180000       0.128100       0.220100       0.691000
53863     53863     shanxi         111.9167       37.0333           92       168     2012      08        30        243              0.213833      25.277588       0.000000       0.298826       0.162000   -9999.000000       0.179500   -9999.000000
53863     53863     shanxi         111.9167       37.0333           92       168     2012      08        31        244              0.208750      24.961182       2.162526       0.291264       0.216000       0.043100       0.191900       0.708000
53863     53863     shanxi         111.9167       37.0333           92       168     2012      09        01        245              0.265125      22.955170      28.387440       0.295909       0.213000   -9999.000000       0.244400   -9999.000000
53863     53863     shanxi         111.9167       37.0333           92       168     2012      09        02        246              0.283333      19.846497       0.000000       0.373548       0.207000       0.221000       0.221200       0.896000
53863     53863     shanxi         111.9167       37.0333           92       168     2012      09        03        247              0.268875      21.267700       0.000000       0.343678       0.190000   -9999.000000       0.153100       0.765000
53863     53863     shanxi         111.9167       37.0333           92       168     2012      09        04        248              0.259708      21.016022       1.650234       0.329602       0.190000   -9999.000000       0.224900       0.700000
53863     53863     shanxi         111.9167       37.0333           92       168     2012      09        05        249              0.255292      21.291138      16.850965       0.322891       0.207000       0.033800       0.182100       0.768000
53863     53863     shanxi         111.9167       37.0333           92       168     2012      09        06        250              0.335083      19.927582      28.773125       0.342411   -9999.000000   -9999.000000       0.209100   -9999.000000
53863     53863     shanxi         111.9167       37.0333           92       168     2012      09        07        251              0.315917      18.219574       0.000000       0.393478       0.192500       0.118700   -9999.000000       0.929000
53863     53863     shanxi         111.9167       37.0333           92       168     2012      09        08        252              0.303292      20.550140       0.000000       0.363634       0.194000       0.133000       0.190200       0.917000
53863     53863     shanxi         111.9167       37.0333           92       168     2012      09        09        253              0.290833      21.877167       0.160482       0.352122       0.191000   -9999.000000       0.183300       0.899000
53863     53863     shanxi         111.9167       37.0333           92       168     2012      09        10        254              0.281917      21.749786       2.027712       0.343280       0.216000   -9999.000000       0.203000       0.870000
53863     53863     shanxi         111.9167       37.0333           92       168     2012      09        11        255              0.279500      19.975159       0.326924       0.345171       0.159000   -9999.000000       0.172700   -9999.000000
53863     53863     shanxi         111.9167       37.0333           92       168     2012      09        12        256              0.266750      20.962921       0.000000       0.337452       0.162000       0.099200       0.174200       0.762000
53863     53863     shanxi         111.9167       37.0333           92       168     2012      09        13        257              0.256500      17.081665       0.561919       0.331089       0.160000       0.063500   -9999.000000       0.739000
53863     53863     shanxi         111.9167       37.0333           92       168     2012      09        14        258              0.248000      17.551941       0.000000       0.325487       0.153000   -9999.000000       0.149300       0.775000
53863     53863     shanxi         111.9167       37.0333           92       168     2012      09        15        259              0.240625      18.737976       0.233372       0.321630       0.163000       0.134100       0.186700       0.647000
53863     53863     shanxi         111.9167       37.0333           92       168     2012      09        16        260              0.235458      19.031403       0.000000       0.318914       0.179000       0.046900       0.160000   -9999.000000
53863     53863     shanxi         111.9167       37.0333           92       168     2012      09        17        261              0.229083      19.585571       0.000000       0.315230       0.146000   -9999.000000       0.133100       0.665000
53863     53863     shanxi         111.9167       37.0333           92       168     2012      09        18        262              0.221542      19.142975       0.067208       0.312556       0.177000       0.132300       0.128400       0.716000
53863     53863     shanxi         111.9167       37.0333           92       168     2012      09        19        263              0.216708      19.356506       3.696608       0.310027   -9999.000000   -9999.000000       0.137900       0.833000
53863     53863     shanxi         111.9167       37.0333           92       168     2012      09        20        264              0.215833      18.245300       1.476696       0.325167   -9999.000000   -9999.000000       0.138100       0.647000
53863     53863     shanxi         111.9167       37.0333           92       168     2012      09        21        265              0.218958      19.021149       2.263585       0.318973   -9999.000000       0.199100       0.153400   -9999.000000
53863     53863     shanxi         111.9167       37.0333           92       168     2012      09        22        266              0.221917      17.836884       0.000000       0.329332       0.140000   -9999.000000       0.132300       0.700000
53863     53863     shanxi         111.9167       37.0333           92       168     2012      09        23        267              0.219125      19.429840       0.000000       0.318825       0.141500   -9999.000000       0.135100   -9999.000000
53863     53863     shanxi         111.9167       37.0333           92       168     2012      09        24        268              0.216083      19.870270       0.118167       0.313498       0.147000   -9999.000000   -9999.000000       0.691000
53863     53863     shanxi         111.9167       37.0333           92       168     2012      09        25        269              0.219292      20.282013       5.908640       0.310148   -9999.000000       0.221700       0.134300       0.856000
53863     53863     shanxi         111.9167       37.0333           92       168     2012      09        26        270              0.227042      17.853912       0.000000       0.330394       0.156000       0.099900       0.125700       0.878000
53863     53863     shanxi         111.9167       37.0333           92       168     2012      09        27        271              0.222714      19.363556       0.000000       0.321030   -9999.000000   -9999.000000       0.135000       0.602000
53863     53863     shanxi         111.9167       37.0333           92       168     2012      09        28        272              0.208733      17.130310       0.000000       0.310644       0.144000   -9999.000000       0.113200   -9999.000000
53863     53863     shanxi         111.9167       37.0333           92       168     2012      09        29        273              0.203875      15.520294       0.000000       0.305935       0.161000   -9999.000000       0.120100       0.526000
53863     53863     shanxi         111.9167       37.0333           92       168     2012      09        30        274              0.197500      15.785858       0.000000       0.302573       0.149000   -9999.000000   -9999.000000   -9999.000000
53863     53863     shanxi         111.9167       37.0333           92       168     2012      10        01        275              0.191667      15.733429       0.000000       0.299186       0.118000   -9999.000000       0.073800       0.615000
53863     53863     shanxi         111.9167       37.0333           92       168     2012      10        02        276              0.187708      16.525360       0.000000       0.296129       0.127000   -9999.000000       0.102800       0.665000
53863     53863     shanxi         111.9167       37.0333           92       168     2012      10        03        277              0.183583      18.248962       0.000000       0.293864       0.104500       0.065400       0.082900       0.670000
53863     53863     shanxi         111.9167       37.0333           92       168     2012      10        04        278              0.180083      18.805573       4.054957       0.290064   -9999.000000       0.074600       0.104600       0.877000
53863     53863     shanxi         111.9167       37.0333           92       168     2012      10        05        279              0.179667      15.393036       0.000000       0.309921       0.128000   -9999.000000   -9999.000000   -9999.000000
53863     53863     shanxi         111.9167       37.0333           92       168     2012      10        06        280              0.178542      15.812836       0.000000       0.301596       0.120000       0.209600       0.095700       0.719000
53863     53863     shanxi         111.9167       37.0333           92       168     2012      10        07        281              0.178542      16.235046       0.000000       0.296392       0.134000   -9999.000000       0.081700       0.711000
53863     53863     shanxi         111.9167       37.0333           92       168     2012      10        08        282              0.177417      16.134369       1.154252       0.294851       0.121000       0.157200       0.096900       0.710000
53863     53863     shanxi         111.9167       37.0333           92       168     2012      10        09        283              0.173250      16.809296       0.000000       0.295898       0.115000       0.028600       0.077000       0.650000
53863     53863     shanxi         111.9167       37.0333           92       168     2012      10        10        284              0.169875      14.689301       0.000000       0.292519       0.121000   -9999.000000       0.090600   -9999.000000
53863     53863     shanxi         111.9167       37.0333           92       168     2012      10        11        285              0.167167      14.668732       0.000000       0.288126       0.101000       0.022700   -9999.000000       0.648000
53863     53863     shanxi         111.9167       37.0333           92       168     2012      10        12        286              0.165917      15.981171       0.000000       0.285916       0.105000   -9999.000000       0.080100       0.618000
53863     53863     shanxi         111.9167       37.0333           92       168     2012      10        13        287              0.163583      16.530365       0.000000       0.283201       0.107000       0.043000       0.093000       0.710000
53863     53863     shanxi         111.9167       37.0333           92       168     2012      10        14        288              0.162167      16.129089       0.328276       0.280251       0.096000       0.100900       0.082500       0.704000
53863     53863     shanxi         111.9167       37.0333           92       168     2012      10        15        289              0.162000      15.467316       0.145367       0.281190       0.126500   -9999.000000       0.076800   -9999.000000
53863     53863     shanxi         111.9167       37.0333           92       168     2012      10        16        290              0.160875      12.773529       0.000000       0.285276       0.118000   -9999.000000       0.077200       0.461000
53863     53863     shanxi         111.9167       37.0333           92       168     2012      10        17        291              0.158583      10.746490       0.000000       0.281357       0.100000   -9999.000000   -9999.000000       0.598000
53863     53863     shanxi         111.9167       37.0333           92       168     2012      10        18        292              0.157750      10.973816       0.000000       0.277471       0.115000   -9999.000000       0.057400       0.564000
53863     53863     shanxi         111.9167       37.0333           92       168     2012      10        19        293              0.157417      11.499329       0.000000       0.277529       0.110000   -9999.000000       0.087800       0.490000
53863     53863     shanxi         111.9167       37.0333           92       168     2012      10        20        294              0.156583      13.045166       0.000000       0.276399       0.104500   -9999.000000       0.076700   -9999.000000
53863     53863     shanxi         111.9167       37.0333           92       168     2012      10        21        295              0.156000      14.353485       1.834903       0.275181       0.125000   -9999.000000       0.095500       0.592000
53863     53863     shanxi         111.9167       37.0333           92       168     2012      10        22        296              0.155792       9.557159       0.361744       0.289323   -9999.000000       0.023500   -9999.000000   -9999.000000
53863     53863     shanxi         111.9167       37.0333           92       168     2012      10        23        297              0.155667      10.252533       0.000000       0.284390   -9999.000000   -9999.000000       0.080000       0.576000
53863     53863     shanxi         111.9167       37.0333           92       168     2012      10        24        298              0.155625      10.395294       0.000000       0.281060   -9999.000000   -9999.000000       0.064400       0.484000
53863     53863     shanxi         111.9167       37.0333           92       168     2012      10        25        299              0.000000      11.902496       0.000000       0.276850       0.103000   -9999.000000       0.083600       0.467000
53863     53863     shanxi         111.9167       37.0333           92       168     2012      10        26        300              0.154458      11.835114       0.000000       0.275164       0.119000       0.134900       0.068300       0.518000
53863     53863     shanxi         111.9167       37.0333           92       168     2012      10        27        301              0.154333       9.872559       0.000000       0.277017       0.110000       0.154500       0.074200   -9999.000000
53863     53863     shanxi         111.9167       37.0333           92       168     2012      10        28        302              0.000000      12.120789       0.023515       0.274038       0.116000   -9999.000000   -9999.000000       0.574000
53863     53863     shanxi         111.9167       37.0333           92       168     2012      10        29        303              0.153167      12.026611       0.000000       0.273249   -9999.000000       0.090500       0.057600   -9999.000000
53863     53863     shanxi         111.9167       37.0333           92       168     2012      10        30        304              0.151417      11.118530       0.000000       0.270778       0.088000   -9999.000000       0.076100       0.424000
53863     53863     shanxi         111.9167       37.0333           92       168     2012      10        31        305              0.150875       8.727539       0.000000       0.267762       0.112000   -9999.000000       0.056700       0.511000
53863     53863     shanxi         111.9167       37.0333           92       168     2012      11        01        306              0.150833       9.135101       0.000000       0.266049       0.100000       0.040300       0.072700       0.534000
53863     53863     shanxi         111.9167       37.0333           92       168     2012      11        02        307              0.150875       9.633423       1.250136       0.265888       0.101000   -9999.000000       0.067000       0.583000
53863     53863     shanxi         111.9167       37.0333           92       168     2012      11        03        308              0.150750      10.400604       0.000000       0.268907   -9999.000000   -9999.000000       0.072800   -9999.000000
53863     53863     shanxi         111.9167       37.0333           92       168     2012      11        04        309              0.150208       3.930511       0.000000       0.262541   -9999.000000   -9999.000000       0.052100       0.520000
53863     53863     shanxi         111.9167       37.0333           92       168     2012      11        05        310              0.150500       2.243896       0.000000       0.255883       0.118000   -9999.000000       0.072700       0.563000
53863     53863     shanxi         111.9167       37.0333           92       168     2012      11        06        311              0.150792       4.634766       0.000000       0.263942       0.118000       0.050400       0.060700       0.573000
53863     53863     shanxi         111.9167       37.0333           92       168     2012      11        07        312              0.151000       6.487488       0.028869       0.269061       0.117000   -9999.000000       0.068900       0.445000
53863     53863     shanxi         111.9167       37.0333           92       168     2012      11        08        313              0.150917       5.016510       0.000000       0.269172   -9999.000000   -9999.000000   -9999.000000   -9999.000000
53863     53863     shanxi         111.9167       37.0333           92       168     2012      11        09        314              0.151000       5.826172       0.342124       0.269504   -9999.000000       0.024800       0.084900       0.531000
53863     53863     shanxi         111.9167       37.0333           92       168     2012      11        10        315              0.151583       6.105469       0.100657       0.272910   -9999.000000   -9999.000000       0.071900       0.504000
53863     53863     shanxi         111.9167       37.0333           92       168     2012      11        11        316              0.152583       3.463959       0.000000       0.263894       0.125000   -9999.000000       0.063200       0.565000
53863     53863     shanxi         111.9167       37.0333           92       168     2012      11        12        317              0.154583       2.963287       0.000000       0.254917       0.116000   -9999.000000       0.061700       0.414000
53863     53863     shanxi         111.9167       37.0333           92       168     2012      11        13        318              0.000000       4.222321       0.000000       0.263635       0.108000   -9999.000000       0.064900   -9999.000000
53863     53863     shanxi         111.9167       37.0333           92       168     2012      11        14        319              0.156000       4.572815       0.000000       0.259372   -9999.000000       0.055600   -9999.000000       0.381000
53863     53863     shanxi         111.9167       37.0333           92       168     2012      11        15        320              0.157083       4.016602       0.200460       0.259448   -9999.000000   -9999.000000       0.052100       0.660000
53863     53863     shanxi         111.9167       37.0333           92       168     2012      11        16        321              0.158583       2.626801       0.000000       0.265321       0.104000   -9999.000000       0.069800       0.613000
53863     53863     shanxi         111.9167       37.0333           92       168     2012      11        17        322              0.000000       3.944550       0.000000       0.258588       0.110000   -9999.000000       0.059300       0.439000
53863     53863     shanxi         111.9167       37.0333           92       168     2012      11        18        323              0.160167       4.134766       0.000000       0.259169       0.115000   -9999.000000       0.074700   -9999.000000
53863     53863     shanxi         111.9167       37.0333           92       168     2012      11        19        324              0.160708       4.770508       0.000000       0.259894   -9999.000000       0.014400   -9999.000000       0.471000
53863     53863     shanxi         111.9167       37.0333           92       168     2012      11        20        325              0.161625       4.582947       0.000000       0.264938   -9999.000000   -9999.000000       0.067600   -9999.000000
53863     53863     shanxi         111.9167       37.0333           92       168     2012      11        21        326              0.162125       4.992584       0.000000       0.268557       0.098000   -9999.000000       0.051800       0.455000
53863     53863     shanxi         111.9167       37.0333           92       168     2012      11        22        327              0.161750       6.238068       0.000000       0.269497   -9999.000000   -9999.000000       0.069700   -9999.000000
53863     53863     shanxi         111.9167       37.0333           92       168     2012      11        23        328              0.161042       3.561737       0.000000       0.265049       0.101000   -9999.000000       0.057000       0.357000
53863     53863     shanxi         111.9167       37.0333           92       168     2012      11        24        329              0.160750       2.381165       0.000000       0.242250   -9999.000000       0.023300       0.060900       0.481000
53863     53863     shanxi         111.9167       37.0333           92       168     2012      11        25        330              0.160708       2.629974       0.000000       0.253018   -9999.000000   -9999.000000   -9999.000000   -9999.000000
53863     53863     shanxi         111.9167       37.0333           92       168     2012      11        26        331              0.160292       2.083038       0.000000       0.245460   -9999.000000   -9999.000000   -9999.000000       0.371000
53863     53863     shanxi         111.9167       37.0333           92       168     2012      11        27        332              0.160708       2.199982       0.000000       0.239422       0.098000       0.126500       0.061500   -9999.000000
53863     53863     shanxi         111.9167       37.0333           92       168     2012      11        28        333              0.160458       3.388916       0.000000       0.246230   -9999.000000   -9999.000000       0.047500       0.225000
53863     53863     shanxi         111.9167       37.0333           92       168     2012      11        29        334              0.159250       0.823486       0.000000       0.226001   -9999.000000       0.059000       0.047400       0.423000
53863     53863     shanxi         111.9167       37.0333           92       168     2012      11        30        335              0.158333       0.319641       0.000000       0.219208   -9999.000000   -9999.000000       0.052600       0.418000
53863     53863     shanxi         111.9167       37.0333           92       168     2012      12        01        336              0.158667       0.382721       0.132516       0.218595   -9999.000000       0.147800   -9999.000000       0.412000
53863     53863     shanxi         111.9167       37.0333           92       168     2012      12        02        337              0.159500      -0.624939       0.000000       0.205433   -9999.000000       0.024400       0.036900   -9999.000000
53863     53863     shanxi         111.9167       37.0333           92       168     2012      12        03        338              0.158333      -0.454681       0.000000       0.209654   -9999.000000   -9999.000000       0.059100       0.394000
53863     53863     shanxi         111.9167       37.0333           92       168     2012      12        04        339              0.158292      -0.829071       0.000000       0.206823       0.099000       0.069200       0.048300       0.399000
53863     53863     shanxi         111.9167       37.0333           92       168     2012      12        05        340              0.157667       0.787384       0.000000       0.223179   -9999.000000   -9999.000000       0.051100       0.399000
53863     53863     shanxi         111.9167       37.0333           92       168     2012      12        06        341              0.156625      -1.157532       0.000000       0.205401   -9999.000000   -9999.000000   -9999.000000       0.356000
53863     53863     shanxi         111.9167       37.0333           92       168     2012      12        07        342              0.158500       0.672913       0.000000       0.221232   -9999.000000       0.032600       0.054900   -9999.000000
53863     53863     shanxi         111.9167       37.0333           92       168     2012      12        08        343              0.155708      -0.192474       0.000000       0.213720   -9999.000000   -9999.000000       0.043000       0.279000
53863     53863     shanxi         111.9167       37.0333           92       168     2012      12        09        344              0.149875      -2.405243       0.000000       0.192237   -9999.000000   -9999.000000       0.059800       0.333000
53863     53863     shanxi         111.9167       37.0333           92       168     2012      12        10        345              0.148250      -2.386658       0.138441       0.189834   -9999.000000   -9999.000000       0.038600       0.332000
53863     53863     shanxi         111.9167       37.0333           92       168     2012      12        11        346              0.145375      -1.502533       0.036741       0.198886   -9999.000000   -9999.000000       0.044800       0.374000
53863     53863     shanxi         111.9167       37.0333           92       168     2012      12        12        347              0.144042      -2.769043       0.047497       0.186764   -9999.000000   -9999.000000   -9999.000000   -9999.000000
53863     53863     shanxi         111.9167       37.0333           92       168     2012      12        13        348              0.145542      -2.353271       0.211216       0.188896   -9999.000000   -9999.000000       0.037900       0.245000
53863     53863     shanxi         111.9167       37.0333           92       168     2012      12        14        349              0.149750      -2.497833       0.000000       0.179697   -9999.000000   -9999.000000       0.055700       0.340000
53863     53863     shanxi         111.9167       37.0333           92       168     2012      12        15        350              0.000000      -1.364960       0.000000       0.198037   -9999.000000   -9999.000000       0.040900       0.373000
53863     53863     shanxi         111.9167       37.0333           92       168     2012      12        16        351              0.158833      -0.502838       0.089502       0.206925   -9999.000000   -9999.000000       0.055500       0.470000
53863     53863     shanxi         111.9167       37.0333           92       168     2012      12        17        352              0.159250       0.054962       0.000000       0.218093   -9999.000000       0.068400       0.049600   -9999.000000
53863     53863     shanxi         111.9167       37.0333           92       168     2012      12        18        353              0.153875      -0.907196       0.000000       0.207753   -9999.000000   -9999.000000       0.056000       0.297000
53863     53863     shanxi         111.9167       37.0333           92       168     2012      12        19        354              0.148000      -2.448364       0.000000       0.189306   -9999.000000       0.158200       0.035600   -9999.000000
53863     53863     shanxi         111.9167       37.0333           92       168     2012      12        20        355              0.000000      -2.527557       0.190999       0.182104   -9999.000000       0.052200       0.055000       0.330000
53863     53863     shanxi         111.9167       37.0333           92       168     2012      12        21        356              0.152708      -2.510406       0.000000       0.181680   -9999.000000   -9999.000000       0.043700   -9999.000000
53863     53863     shanxi         111.9167       37.0333           92       168     2012      12        22        357              0.147583      -2.084259       0.000000       0.193019   -9999.000000   -9999.000000       0.045000       0.280000
53863     53863     shanxi         111.9167       37.0333           92       168     2012      12        23        358              0.141417      -5.994568       0.000000       0.166258   -9999.000000   -9999.000000   -9999.000000       0.169000
53863     53863     shanxi         111.9167       37.0333           92       168     2012      12        24        359              0.138625      -7.609589       0.000000       0.154687   -9999.000000       0.044800       0.045500   -9999.000000
53863     53863     shanxi         111.9167       37.0333           92       168     2012      12        25        360              0.139333      -5.188812       0.000000       0.164863   -9999.000000   -9999.000000       0.038700       0.294000
53863     53863     shanxi         111.9167       37.0333           92       168     2012      12        26        361              0.000000      -3.983429       0.000000       0.172248   -9999.000000   -9999.000000       0.054400   -9999.000000
53863     53863     shanxi         111.9167       37.0333           92       168     2012      12        27        362              0.139417      -3.583466       0.000000       0.176346   -9999.000000   -9999.000000       0.041500       0.154000
53863     53863     shanxi         111.9167       37.0333           92       168     2012      12        28        363              0.138000      -3.399353       0.000000       0.179955   -9999.000000   -9999.000000       0.044800       0.255000
53863     53863     shanxi         111.9167       37.0333           92       168     2012      12        29        364              0.000000      -3.103302       0.000000       0.182934   -9999.000000   -9999.000000   -9999.000000       0.172000
53863     53863     shanxi         111.9167       37.0333           92       168     2012      12        30        365              0.000000      -6.422089       0.000000       0.159460   -9999.000000   -9999.000000       0.031400       0.308000
53863     53863     shanxi         111.9167       37.0333           92       168     2012      12        31        366              0.139867      -4.887543       0.000000       0.166609   -9999.000000   -9999.000000       0.048300   -9999.000000
