# Supplementary material for: Research on Fusing Multisatellite Soil Moisture Data Based on Bayesian Model Averaging
Source: Hindawi journal article supplement (doi:10.1155/2018/9310838), 2018-06-25
Supplement: f1 [file 9310838.f1.zip › 2012_sm00-10cm_daily_ZDB_ZHY_53865_366days_allin.txt]

53865     53865     shanxi         111.5869       36.6525           93       166     2012      01        01        001              0.000000   -9999.000000       0.000000   -9999.000000       0.086000   -9999.000000       0.031100   -9999.000000
53865     53865     shanxi         111.5869       36.6525           93       166     2012      01        02        002              0.095625      -3.115417       0.000000       0.160915   -9999.000000   -9999.000000       0.033900       0.065000
53865     53865     shanxi         111.5869       36.6525           93       166     2012      01        03        003              0.000000      -5.013245       0.000000       0.148401   -9999.000000   -9999.000000   -9999.000000       0.017000
53865     53865     shanxi         111.5869       36.6525           93       166     2012      01        04        004              0.078250      -7.688049       0.000000       0.133576   -9999.000000   -9999.000000       0.031800   -9999.000000
53865     53865     shanxi         111.5869       36.6525           93       166     2012      01        05        005              0.076333      -6.704742       0.000000       0.137822   -9999.000000   -9999.000000       0.036600       0.124000
53865     53865     shanxi         111.5869       36.6525           93       166     2012      01        06        006              0.077333      -4.756439       0.000000       0.149328   -9999.000000   -9999.000000       0.034500   -9999.000000
53865     53865     shanxi         111.5869       36.6525           93       166     2012      01        07        007              0.079417      -3.746338       0.000000       0.155468   -9999.000000   -9999.000000       0.035000       0.040000
53865     53865     shanxi         111.5869       36.6525           93       166     2012      01        08        008              0.000000      -3.956757       0.000000       0.147036   -9999.000000   -9999.000000   -9999.000000   -9999.000000
53865     53865     shanxi         111.5869       36.6525           93       166     2012      01        09        009              0.083750      -3.104675       0.000000       0.162078   -9999.000000   -9999.000000   -9999.000000       0.119000
53865     53865     shanxi         111.5869       36.6525           93       166     2012      01        10        010              0.084375      -2.260101       0.000000       0.172567   -9999.000000   -9999.000000       0.030000       0.058000
53865     53865     shanxi         111.5869       36.6525           93       166     2012      01        11        011              0.082500      -3.383392       0.000000       0.162909   -9999.000000   -9999.000000       0.033000       0.149000
53865     53865     shanxi         111.5869       36.6525           93       166     2012      01        12        012              0.080000      -4.107086       0.000000       0.157035       0.079000   -9999.000000       0.031700       0.010000
53865     53865     shanxi         111.5869       36.6525           93       166     2012      01        13        013              0.079875      -2.758118       0.000000       0.170557   -9999.000000   -9999.000000       0.032900   -9999.000000
53865     53865     shanxi         111.5869       36.6525           93       166     2012      01        14        014              0.080917      -2.136841       0.000000       0.174116   -9999.000000   -9999.000000   -9999.000000       0.084000
53865     53865     shanxi         111.5869       36.6525           93       166     2012      01        15        015              0.079125      -3.225311       0.000000       0.162797   -9999.000000   -9999.000000       0.031400       0.024000
53865     53865     shanxi         111.5869       36.6525           93       166     2012      01        16        016              0.079333      -2.301514       0.000000       0.173810   -9999.000000   -9999.000000       0.031600       0.171000
53865     53865     shanxi         111.5869       36.6525           93       166     2012      01        17        017              0.000000      -3.321014       0.000000       0.156529   -9999.000000   -9999.000000       0.032600       0.139000
53865     53865     shanxi         111.5869       36.6525           93       166     2012      01        18        018              0.085000      -1.500946       0.000000       0.178513   -9999.000000       0.072600       0.031500   -9999.000000
53865     53865     shanxi         111.5869       36.6525           93       166     2012      01        19        019              0.084833      -1.632812       0.000000       0.180646   -9999.000000   -9999.000000       0.030400       0.192000
53865     53865     shanxi         111.5869       36.6525           93       166     2012      01        20        020              0.087333      -0.957458       0.000000       0.182254   -9999.000000   -9999.000000   -9999.000000       0.094000
53865     53865     shanxi         111.5869       36.6525           93       166     2012      01        21        021              0.084958      -4.049194       0.000000       0.148624   -9999.000000   -9999.000000       0.024000       0.171000
53865     53865     shanxi         111.5869       36.6525           93       166     2012      01        22        022              0.079958      -6.790039       0.000000       0.137731   -9999.000000   -9999.000000       0.024500       0.047000
53865     53865     shanxi         111.5869       36.6525           93       166     2012      01        23        023              0.074958      -8.116821       0.000000       0.133520   -9999.000000   -9999.000000       0.025900   -9999.000000
53865     53865     shanxi         111.5869       36.6525           93       166     2012      01        24        024              0.071917      -8.521088       0.000000       0.130527   -9999.000000   -9999.000000   -9999.000000       0.040000
53865     53865     shanxi         111.5869       36.6525           93       166     2012      01        25        025              0.069083      -8.791168       0.000000       0.129487   -9999.000000   -9999.000000   -9999.000000       0.050000
53865     53865     shanxi         111.5869       36.6525           93       166     2012      01        26        026              0.069833      -6.385742       0.000000       0.139156   -9999.000000   -9999.000000       0.029800       0.223000
53865     53865     shanxi         111.5869       36.6525           93       166     2012      01        27        027              0.072375      -3.766785       0.000000       0.162881       0.093000       0.112800       0.028100       0.007000
53865     53865     shanxi         111.5869       36.6525           93       166     2012      01        28        028              0.074208      -2.206329       0.000000       0.174194       0.101000   -9999.000000       0.032800   -9999.000000
53865     53865     shanxi         111.5869       36.6525           93       166     2012      01        29        029              0.077583      -1.314240       0.000000       0.182730       0.096000   -9999.000000       0.031100       0.084000
53865     53865     shanxi         111.5869       36.6525           93       166     2012      01        30        030              0.077708      -1.439728       0.000000       0.182601       0.097000       0.010400       0.033200       0.137000
53865     53865     shanxi         111.5869       36.6525           93       166     2012      01        31        031              0.079958      -1.218170       0.000000       0.182007   -9999.000000   -9999.000000   -9999.000000       0.112000
53865     53865     shanxi         111.5869       36.6525           93       166     2012      02        01        032              0.079542       0.519531       0.000000       0.202695   -9999.000000   -9999.000000       0.032100       0.053000
53865     53865     shanxi         111.5869       36.6525           93       166     2012      02        02        033              0.075458      -3.906433       0.000000       0.163829   -9999.000000   -9999.000000       0.031200   -9999.000000
53865     53865     shanxi         111.5869       36.6525           93       166     2012      02        03        034              0.076333      -4.081726       0.000000       0.159360       0.092000   -9999.000000       0.030900       0.043000
53865     53865     shanxi         111.5869       36.6525           93       166     2012      02        04        035              0.080042      -1.368774       0.000000       0.179317   -9999.000000   -9999.000000       0.031700   -9999.000000
53865     53865     shanxi         111.5869       36.6525           93       166     2012      02        05        036              0.082500      -1.381805       0.000000       0.181236   -9999.000000   -9999.000000       0.035200       0.121000
53865     53865     shanxi         111.5869       36.6525           93       166     2012      02        06        037              0.080292      -0.050354       0.000000       0.193515   -9999.000000   -9999.000000   -9999.000000   -9999.000000
53865     53865     shanxi         111.5869       36.6525           93       166     2012      02        07        038              0.073042      -5.216614       0.000000       0.157719   -9999.000000   -9999.000000       0.029000       0.086000
53865     53865     shanxi         111.5869       36.6525           93       166     2012      02        08        039              0.069042      -6.743958       0.246965       0.140333   -9999.000000   -9999.000000       0.033700       0.065000
53865     53865     shanxi         111.5869       36.6525           93       166     2012      02        09        040              0.069458      -8.046600       0.000000       0.131201   -9999.000000   -9999.000000       0.031700       0.215000
53865     53865     shanxi         111.5869       36.6525           93       166     2012      02        10        041              0.072000      -5.799622       0.326405       0.140216   -9999.000000   -9999.000000       0.032100       0.017000
53865     53865     shanxi         111.5869       36.6525           93       166     2012      02        11        042              0.074458      -3.759003       0.000000       0.164022   -9999.000000   -9999.000000   -9999.000000   -9999.000000
53865     53865     shanxi         111.5869       36.6525           93       166     2012      02        12        043              0.078958      -0.767517       0.000000       0.183772   -9999.000000       0.107100   -9999.000000       0.182000
53865     53865     shanxi         111.5869       36.6525           93       166     2012      02        13        044              0.077958      -1.455383       0.000000       0.179966   -9999.000000   -9999.000000   -9999.000000       0.125000
53865     53865     shanxi         111.5869       36.6525           93       166     2012      02        14        045              0.079708      -0.781982       0.000000       0.188456   -9999.000000   -9999.000000       0.037800       0.363000
53865     53865     shanxi         111.5869       36.6525           93       166     2012      02        15        046              0.084458       0.301727       0.000000       0.198022   -9999.000000   -9999.000000       0.038400       0.057000
53865     53865     shanxi         111.5869       36.6525           93       166     2012      02        16        047              0.085167      -0.414520       0.000000       0.194382   -9999.000000   -9999.000000       0.035800   -9999.000000
53865     53865     shanxi         111.5869       36.6525           93       166     2012      02        17        048              0.080917      -2.845032       0.000000       0.172154   -9999.000000   -9999.000000   -9999.000000       0.254000
53865     53865     shanxi         111.5869       36.6525           93       166     2012      02        18        049              0.078875      -4.032257       0.000000       0.161471   -9999.000000   -9999.000000       0.035300       0.179000
53865     53865     shanxi         111.5869       36.6525           93       166     2012      02        19        050              0.080958      -3.224548       0.000000       0.169226       0.078000   -9999.000000       0.039700       0.313000
53865     53865     shanxi         111.5869       36.6525           93       166     2012      02        20        051              0.085792      -0.317841       0.000000       0.187175       0.083000   -9999.000000       0.037200       0.236000
53865     53865     shanxi         111.5869       36.6525           93       166     2012      02        21        052              0.093625       1.679352       0.000000       0.206801   -9999.000000       0.007600   -9999.000000   -9999.000000
53865     53865     shanxi         111.5869       36.6525           93       166     2012      02        22        053              0.100292       3.079041       0.000000       0.218347       0.076000   -9999.000000       0.041800       0.464000
53865     53865     shanxi         111.5869       36.6525           93       166     2012      02        23        054              0.106083       3.889984       0.000000       0.227347       0.071000       0.076900   -9999.000000       0.359000
53865     53865     shanxi         111.5869       36.6525           93       166     2012      02        24        055              0.112417       2.002045       0.000000       0.216082   -9999.000000   -9999.000000       0.031600       0.431000
53865     53865     shanxi         111.5869       36.6525           93       166     2012      02        25        056              0.115667       1.572540       0.000000       0.213021   -9999.000000   -9999.000000       0.036300       0.093000
53865     53865     shanxi         111.5869       36.6525           93       166     2012      02        26        057              0.117750      -0.985107       0.000000       0.178383   -9999.000000   -9999.000000       0.039200   -9999.000000
53865     53865     shanxi         111.5869       36.6525           93       166     2012      02        27        058              0.121125       0.688690       0.000000       0.198739   -9999.000000   -9999.000000   -9999.000000       0.146000
53865     53865     shanxi         111.5869       36.6525           93       166     2012      02        28        059              0.123875       1.554169       0.000000       0.204374       0.072000       0.146400   -9999.000000       0.388000
53865     53865     shanxi         111.5869       36.6525           93       166     2012      02        29        060              0.000000   -9999.000000       0.000000   -9999.000000       0.077000   -9999.000000   -9999.000000   -9999.000000
53865     53865     shanxi         111.5869       36.6525           93       166     2012      03        01        061              0.132167       1.830688       0.000000       0.211488   -9999.000000   -9999.000000       0.035100       0.236000
53865     53865     shanxi         111.5869       36.6525           93       166     2012      03        02        062              0.135750       1.562073       0.000000       0.218980   -9999.000000   -9999.000000       0.039500   -9999.000000
53865     53865     shanxi         111.5869       36.6525           93       166     2012      03        03        063              0.139750       1.074371       0.000000       0.215331   -9999.000000   -9999.000000       0.037600       0.287000
53865     53865     shanxi         111.5869       36.6525           93       166     2012      03        04        064              0.143625       0.431030       0.000000       0.202871       0.079000       0.139700       0.041500   -9999.000000
53865     53865     shanxi         111.5869       36.6525           93       166     2012      03        05        065              0.149042       0.853699       0.053109       0.205636       0.098000   -9999.000000   -9999.000000       0.282000
53865     53865     shanxi         111.5869       36.6525           93       166     2012      03        06        066              0.151000       1.210236       0.000000       0.206069       0.101000   -9999.000000       0.036500   -9999.000000
53865     53865     shanxi         111.5869       36.6525           93       166     2012      03        07        067              0.000000       0.878326       0.000000       0.201020   -9999.000000       0.061400       0.043100       0.575000
53865     53865     shanxi         111.5869       36.6525           93       166     2012      03        08        068              0.167375       3.782684       0.000000       0.224092   -9999.000000   -9999.000000       0.045200       0.421000
53865     53865     shanxi         111.5869       36.6525           93       166     2012      03        09        069              0.178458       3.281860       0.000000       0.228569       0.091000   -9999.000000       0.050000       0.575000
53865     53865     shanxi         111.5869       36.6525           93       166     2012      03        10        070              0.191000       3.285309       0.000000       0.223816       0.083000   -9999.000000       0.048000       0.329000
53865     53865     shanxi         111.5869       36.6525           93       166     2012      03        11        071              0.202750       3.955933       0.000000       0.219626       0.086000   -9999.000000       0.043500   -9999.000000
53865     53865     shanxi         111.5869       36.6525           93       166     2012      03        12        072              0.202000       3.992645       0.000000       0.223033       0.084000       0.284900       0.032800       0.546000
53865     53865     shanxi         111.5869       36.6525           93       166     2012      03        13        073              0.202000       4.489746       0.000000       0.225387   -9999.000000   -9999.000000       0.044200       0.473000
53865     53865     shanxi         111.5869       36.6525           93       166     2012      03        14        074              0.208478       6.795319       0.000000       0.234300   -9999.000000   -9999.000000   -9999.000000       0.676000
53865     53865     shanxi         111.5869       36.6525           93       166     2012      03        15        075              0.207833       6.974091       0.000000       0.234342   -9999.000000       0.012900       0.049600       0.527000
53865     53865     shanxi         111.5869       36.6525           93       166     2012      03        16        076              0.207000       2.427063       0.000000       0.228684       0.080000   -9999.000000   -9999.000000   -9999.000000
53865     53865     shanxi         111.5869       36.6525           93       166     2012      03        17        077              0.208500       6.902954       0.000000       0.238362       0.084000       0.099100       0.041800       0.773000
53865     53865     shanxi         111.5869       36.6525           93       166     2012      03        18        078              0.207667       9.854034       0.000000       0.238690   -9999.000000   -9999.000000       0.047700       0.611000
53865     53865     shanxi         111.5869       36.6525           93       166     2012      03        19        079              0.205750       7.934937       0.000000       0.234362   -9999.000000       0.479200       0.056700       0.650000
53865     53865     shanxi         111.5869       36.6525           93       166     2012      03        20        080              0.205167       3.091949       0.000000       0.232023       0.078000       0.089300       0.051600       0.529000
53865     53865     shanxi         111.5869       36.6525           93       166     2012      03        21        081              0.203625       6.248199       0.034936       0.238452   -9999.000000   -9999.000000       0.057800   -9999.000000
53865     53865     shanxi         111.5869       36.6525           93       166     2012      03        22        082              0.205583       2.819763       0.000000       0.233534   -9999.000000   -9999.000000   -9999.000000       0.641000
53865     53865     shanxi         111.5869       36.6525           93       166     2012      03        23        083              0.205000       3.667084       0.071235       0.235367   -9999.000000   -9999.000000       0.040000       0.518000
53865     53865     shanxi         111.5869       36.6525           93       166     2012      03        24        084              0.204500       4.658966       0.000000       0.225467   -9999.000000   -9999.000000   -9999.000000       0.674000
53865     53865     shanxi         111.5869       36.6525           93       166     2012      03        25        085              0.000000       8.154694       0.000000       0.229907       0.078000       0.073100       0.047900       0.352000
53865     53865     shanxi         111.5869       36.6525           93       166     2012      03        26        086              0.203375      10.175018       0.000000       0.226533       0.084000   -9999.000000       0.054000   -9999.000000
53865     53865     shanxi         111.5869       36.6525           93       166     2012      03        27        087              0.203500      11.507416       0.000000       0.220445       0.074000   -9999.000000   -9999.000000       0.631000
53865     53865     shanxi         111.5869       36.6525           93       166     2012      03        28        088              0.202000      12.697571       0.000000       0.213528       0.082000   -9999.000000       0.061500       0.519000
53865     53865     shanxi         111.5869       36.6525           93       166     2012      03        29        089              0.202500      12.023254       0.000000       0.213472   -9999.000000   -9999.000000       0.046200       0.456000
53865     53865     shanxi         111.5869       36.6525           93       166     2012      03        30        090              0.197917      12.807068       0.000000       0.211136       0.068000       0.425100       0.050900       0.352000
53865     53865     shanxi         111.5869       36.6525           93       166     2012      03        31        091              0.197417       7.741669       0.000000       0.208941       0.063000   -9999.000000       0.048000   -9999.000000
53865     53865     shanxi         111.5869       36.6525           93       166     2012      04        01        092              0.197500      11.671539       0.000000       0.205295       0.075000       0.125400       0.049200       0.555000
53865     53865     shanxi         111.5869       36.6525           93       166     2012      04        02        093              0.195917      13.460724       0.000000       0.201490       0.085000       0.019500   -9999.000000   -9999.000000
53865     53865     shanxi         111.5869       36.6525           93       166     2012      04        03        094              0.194833       8.941437       0.000000       0.202078   -9999.000000   -9999.000000       0.046500       0.455000
53865     53865     shanxi         111.5869       36.6525           93       166     2012      04        04        095              0.195250      11.208801       0.000000       0.198320   -9999.000000       0.151000       0.043300   -9999.000000
53865     53865     shanxi         111.5869       36.6525           93       166     2012      04        05        096              0.196083      13.567505       0.027594       0.193251       0.073500   -9999.000000       0.051400       0.515000
53865     53865     shanxi         111.5869       36.6525           93       166     2012      04        06        097              0.195500      13.467010       0.000000       0.188608       0.070000       0.126500       0.041400       0.484000
53865     53865     shanxi         111.5869       36.6525           93       166     2012      04        07        098              0.194667      14.289978       0.000000       0.185464       0.070000       0.043200       0.046100       0.645000
53865     53865     shanxi         111.5869       36.6525           93       166     2012      04        08        099              0.194917      16.201996       0.000000       0.181787       0.083000   -9999.000000   -9999.000000       0.668000
53865     53865     shanxi         111.5869       36.6525           93       166     2012      04        09        100              0.194333      17.494843       0.510061       0.178517       0.099000   -9999.000000       0.048300   -9999.000000
53865     53865     shanxi         111.5869       36.6525           93       166     2012      04        10        101              0.193833      16.172058       1.738541       0.183018       0.099000   -9999.000000       0.065100       0.535000
53865     53865     shanxi         111.5869       36.6525           93       166     2012      04        11        102              0.193333      15.303101       8.926574       0.209221       0.075000   -9999.000000       0.045100       0.426000
53865     53865     shanxi         111.5869       36.6525           93       166     2012      04        12        103              0.194167      13.259003       0.000000       0.242740       0.089000       0.096600       0.056200       0.762000
53865     53865     shanxi         111.5869       36.6525           93       166     2012      04        13        104              0.195250      11.428741       0.000000       0.259457       0.100000   -9999.000000   -9999.000000       0.427000
53865     53865     shanxi         111.5869       36.6525           93       166     2012      04        14        105              0.194500      15.067352       0.000000       0.237962       0.095000   -9999.000000       0.058100   -9999.000000
53865     53865     shanxi         111.5869       36.6525           93       166     2012      04        15        106              0.195250      15.203278       0.000000       0.225604       0.077000   -9999.000000       0.044000       0.587000
53865     53865     shanxi         111.5869       36.6525           93       166     2012      04        16        107              0.195917      17.362732       0.000000       0.213059       0.075000   -9999.000000       0.059800       0.486000
53865     53865     shanxi         111.5869       36.6525           93       166     2012      04        17        108              0.195000      17.257141       0.309372       0.201553       0.074000       0.213600       0.053200       0.583000
53865     53865     shanxi         111.5869       36.6525           93       166     2012      04        18        109              0.194833      16.558472       0.695177       0.196866       0.074000   -9999.000000   -9999.000000       0.293000
53865     53865     shanxi         111.5869       36.6525           93       166     2012      04        19        110              0.194917      17.430115       6.184283       0.199454       0.091000       0.202200   -9999.000000   -9999.000000
53865     53865     shanxi         111.5869       36.6525           93       166     2012      04        20        111              0.193000      17.433563       0.160587       0.196880       0.096000   -9999.000000       0.060900       0.650000
53865     53865     shanxi         111.5869       36.6525           93       166     2012      04        21        112              0.192917      14.719604       0.000000       0.198172       0.073500   -9999.000000       0.060600       0.445000
53865     53865     shanxi         111.5869       36.6525           93       166     2012      04        22        113              0.193750      18.497314       0.996582       0.190448       0.067000       0.081200       0.058000       0.606000
53865     53865     shanxi         111.5869       36.6525           93       166     2012      04        23        114              0.195583      20.970276       5.523926       0.191212       0.073000   -9999.000000       0.053000       0.318000
53865     53865     shanxi         111.5869       36.6525           93       166     2012      04        24        115              0.191667      22.348450       0.544043       0.210897       0.138000       0.256000       0.082100   -9999.000000
53865     53865     shanxi         111.5869       36.6525           93       166     2012      04        25        116              0.000000      13.279724       0.000000       0.245231       0.104000       0.134700   -9999.000000       0.339000
53865     53865     shanxi         111.5869       36.6525           93       166     2012      04        26        117              0.190750      13.553192       0.000000       0.220781       0.079500   -9999.000000       0.057500       0.502000
53865     53865     shanxi         111.5869       36.6525           93       166     2012      04        27        118              0.192833      17.695923       0.000000       0.206300       0.070000       0.230000   -9999.000000       0.458000
53865     53865     shanxi         111.5869       36.6525           93       166     2012      04        28        119              0.193333      19.799072       0.694531       0.192662       0.070000   -9999.000000       0.050000       0.264000
53865     53865     shanxi         111.5869       36.6525           93       166     2012      04        29        120              0.193750      21.259155       0.000000       0.189727       0.088000       0.232400       0.056300   -9999.000000
53865     53865     shanxi         111.5869       36.6525           93       166     2012      04        30        121              0.193333      21.822540       0.000000       0.183813       0.086000       0.030400   -9999.000000       0.415000
53865     53865     shanxi         111.5869       36.6525           93       166     2012      05        01        122              0.192917      21.438507       1.292100       0.179644       0.113500   -9999.000000       0.061400   -9999.000000
53865     53865     shanxi         111.5869       36.6525           93       166     2012      05        02        123              0.192750      20.282959       0.000000       0.178672       0.110500       0.086500       0.050500       0.408000
53865     53865     shanxi         111.5869       36.6525           93       166     2012      05        03        124              0.192000      22.459778       0.741889       0.174282       0.097000   -9999.000000       0.055300   -9999.000000
53865     53865     shanxi         111.5869       36.6525           93       166     2012      05        04        125              0.192917      22.862091       0.333385       0.171867   -9999.000000   -9999.000000       0.046300       0.492000
53865     53865     shanxi         111.5869       36.6525           93       166     2012      05        05        126              0.192667      24.498291       0.000000       0.169255       0.113000   -9999.000000       0.049800       0.432000
53865     53865     shanxi         111.5869       36.6525           93       166     2012      05        06        127              0.192750      25.018921       0.267652       0.164953   -9999.000000   -9999.000000   -9999.000000       0.481000
53865     53865     shanxi         111.5869       36.6525           93       166     2012      05        07        128              0.190917      25.566345       0.000000       0.163869   -9999.000000       0.074200       0.053900       0.409000
53865     53865     shanxi         111.5869       36.6525           93       166     2012      05        08        129              0.190125      23.999054       1.051587       0.165123   -9999.000000       0.056900       0.062400   -9999.000000
53865     53865     shanxi         111.5869       36.6525           93       166     2012      05        09        130              0.188250      25.006165       0.000000       0.164682       0.090000   -9999.000000       0.052600       0.459000
53865     53865     shanxi         111.5869       36.6525           93       166     2012      05        10        131              0.188083      23.600342       0.275973       0.164319       0.112000   -9999.000000       0.055500       0.413000
53865     53865     shanxi         111.5869       36.6525           93       166     2012      05        11        132              0.183333      25.330444       1.213633       0.161731       0.212500   -9999.000000       0.068800       0.419000
53865     53865     shanxi         111.5869       36.6525           93       166     2012      05        12        133              0.180333      18.313873       0.000000       0.180645       0.136000       0.168400   -9999.000000       0.243000
53865     53865     shanxi         111.5869       36.6525           93       166     2012      05        13        134              0.179000      16.661804       0.035131       0.175492       0.138000       0.070400       0.046000   -9999.000000
53865     53865     shanxi         111.5869       36.6525           93       166     2012      05        14        135              0.179833      17.263397       1.253483       0.169268       0.116000   -9999.000000       0.081400       0.372000
53865     53865     shanxi         111.5869       36.6525           93       166     2012      05        15        136              0.180167      18.980225       4.387681       0.163872       0.160000       0.140200       0.069100       0.246000
53865     53865     shanxi         111.5869       36.6525           93       166     2012      05        16        137              0.179917      20.126831       0.221077       0.160619       0.160000   -9999.000000       0.073500       0.476000
53865     53865     shanxi         111.5869       36.6525           93       166     2012      05        17        138              0.180750      21.001678       0.000000       0.158646       0.129500   -9999.000000   -9999.000000       0.238000
53865     53865     shanxi         111.5869       36.6525           93       166     2012      05        18        139              0.181417      23.882141       0.041972       0.156534       0.132500       0.144000       0.076200   -9999.000000
53865     53865     shanxi         111.5869       36.6525           93       166     2012      05        19        140              0.182000      25.433258       0.108222       0.156226   -9999.000000   -9999.000000       0.073400       0.288000
53865     53865     shanxi         111.5869       36.6525           93       166     2012      05        20        141              0.181583      26.850983       0.700431       0.156075   -9999.000000       0.177900       0.081100       0.368000
53865     53865     shanxi         111.5869       36.6525           93       166     2012      05        21        142              0.176000      25.366882       1.872201       0.157133       0.261000   -9999.000000       0.063500       0.501000
53865     53865     shanxi         111.5869       36.6525           93       166     2012      05        22        143              0.174917      17.501160       0.000000       0.185568       0.178500   -9999.000000       0.061100       0.214000
53865     53865     shanxi         111.5869       36.6525           93       166     2012      05        23        144              0.175500      20.523285       0.038175       0.182910   -9999.000000       0.416200   -9999.000000   -9999.000000
53865     53865     shanxi         111.5869       36.6525           93       166     2012      05        24        145              0.175542      20.978973       0.021196       0.168570       0.167000   -9999.000000       0.054300       0.218000
53865     53865     shanxi         111.5869       36.6525           93       166     2012      05        25        146              0.000000      21.810028       0.000000       0.161833   -9999.000000       0.099000       0.063500       0.353000
53865     53865     shanxi         111.5869       36.6525           93       166     2012      05        26        147              0.177208      22.906891       0.613529       0.158132       0.197000       0.062800       0.056200       0.300000
53865     53865     shanxi         111.5869       36.6525           93       166     2012      05        27        148              0.178000      23.544342       0.476838       0.156286       0.170500   -9999.000000       0.057100       0.214000
53865     53865     shanxi         111.5869       36.6525           93       166     2012      05        28        149              0.177667      26.115051      19.728659       0.154190       0.133000       0.320100       0.058200   -9999.000000
53865     53865     shanxi         111.5869       36.6525           93       166     2012      05        29        150              0.191583      24.842346       1.909511       0.205931       0.217000   -9999.000000   -9999.000000       0.600000
53865     53865     shanxi         111.5869       36.6525           93       166     2012      05        30        151              0.195833      21.179169       1.857345       0.282132       0.165000       0.284300       0.054200   -9999.000000
53865     53865     shanxi         111.5869       36.6525           93       166     2012      05        31        152              0.194750      21.831085       0.000000       0.246442       0.225000       0.116600   -9999.000000   -9999.000000
53865     53865     shanxi         111.5869       36.6525           93       166     2012      06        01        153              0.194833      21.028046       1.853005       0.232219       0.234000   -9999.000000       0.051700   -9999.000000
53865     53865     shanxi         111.5869       36.6525           93       166     2012      06        02        154              0.193833      22.551941       1.039608       0.230817       0.204000   -9999.000000       0.062500       0.445000
53865     53865     shanxi         111.5869       36.6525           93       166     2012      06        03        155              0.192667      21.409485       0.000000       0.228060       0.156000   -9999.000000   -9999.000000       0.331000
53865     53865     shanxi         111.5869       36.6525           93       166     2012      06        04        156              0.194000      22.726562       0.307400       0.211378       0.141000   -9999.000000       0.094500       0.429000
53865     53865     shanxi         111.5869       36.6525           93       166     2012      06        05        157              0.192917      25.032837       1.831347       0.194975   -9999.000000       0.144000       0.104400       0.286000
53865     53865     shanxi         111.5869       36.6525           93       166     2012      06        06        158              0.189125      24.382996       0.248756       0.195688       0.212000   -9999.000000       0.109600   -9999.000000
53865     53865     shanxi         111.5869       36.6525           93       166     2012      06        07        159              0.189333      19.424164       1.666939       0.208030       0.243000   -9999.000000       0.095900       0.384000
53865     53865     shanxi         111.5869       36.6525           93       166     2012      06        08        160              0.189042      22.723633       0.000000       0.206670       0.189000   -9999.000000       0.095200       0.363000
53865     53865     shanxi         111.5869       36.6525           93       166     2012      06        09        161              0.191458      22.697601       2.374049       0.195103       0.140000   -9999.000000   -9999.000000       0.462000
53865     53865     shanxi         111.5869       36.6525           93       166     2012      06        10        162              0.190125      26.395386       0.000000       0.176659       0.184000       0.286300       0.090200       0.349000
53865     53865     shanxi         111.5869       36.6525           93       166     2012      06        11        163              0.000000      24.494537       0.000000       0.165829       0.201000   -9999.000000       0.121700   -9999.000000
53865     53865     shanxi         111.5869       36.6525           93       166     2012      06        12        164              0.189083      25.360046       0.000000       0.159882       0.166500       0.132400       0.103300       0.519000
53865     53865     shanxi         111.5869       36.6525           93       166     2012      06        13        165              0.188792      27.479004       0.533547       0.156856       0.175500   -9999.000000       0.113000       0.438000
53865     53865     shanxi         111.5869       36.6525           93       166     2012      06        14        166              0.187667      27.750122       0.347378       0.158735       0.147000   -9999.000000       0.107600       0.530000
53865     53865     shanxi         111.5869       36.6525           93       166     2012      06        15        167              0.186792      25.664124       5.674528       0.156078       0.164000       0.128900       0.119300       0.262000
53865     53865     shanxi         111.5869       36.6525           93       166     2012      06        16        168              0.186500      26.510712       0.000000       0.155663       0.188000   -9999.000000       0.105500   -9999.000000
53865     53865     shanxi         111.5869       36.6525           93       166     2012      06        17        169              0.186083      28.165649       0.000000       0.153724       0.159000   -9999.000000       0.120800       0.358000
53865     53865     shanxi         111.5869       36.6525           93       166     2012      06        18        170              0.185917      29.563934       0.404864       0.151557       0.158000       0.029500       0.074000       0.445000
53865     53865     shanxi         111.5869       36.6525           93       166     2012      06        19        171              0.184167      30.303467       1.084756       0.150866       0.136000   -9999.000000       0.080300       0.522000
53865     53865     shanxi         111.5869       36.6525           93       166     2012      06        20        172              0.181833      28.475769       3.537573       0.159660   -9999.000000   -9999.000000   -9999.000000       0.293000
53865     53865     shanxi         111.5869       36.6525           93       166     2012      06        21        173              0.179500      27.191437       2.090366       0.156467       0.203000   -9999.000000       0.089600   -9999.000000
53865     53865     shanxi         111.5869       36.6525           93       166     2012      06        22        174              0.180208      26.398773       0.374192       0.171810   -9999.000000       0.217200       0.089600       0.455000
53865     53865     shanxi         111.5869       36.6525           93       166     2012      06        23        175              0.179000      28.006073       6.961576       0.162025       0.215000       0.227700       0.067800       0.555000
53865     53865     shanxi         111.5869       36.6525           93       166     2012      06        24        176              0.177250      28.603912       7.163169       0.170812       0.255000   -9999.000000       0.102200       0.639000
53865     53865     shanxi         111.5869       36.6525           93       166     2012      06        25        177              0.176708      24.467102       0.180167       0.271809       0.250000       0.208500       0.117300       0.561000
53865     53865     shanxi         111.5869       36.6525           93       166     2012      06        26        178              0.176500      23.759918       0.000000       0.236909       0.247000   -9999.000000   -9999.000000   -9999.000000
53865     53865     shanxi         111.5869       36.6525           93       166     2012      06        27        179              0.176292      23.382843       1.043590       0.222037       0.262000   -9999.000000       0.111600       0.608000
53865     53865     shanxi         111.5869       36.6525           93       166     2012      06        28        180              0.175833      21.948639      17.319912       0.216531       0.297500       0.141600       0.129100   -9999.000000
53865     53865     shanxi         111.5869       36.6525           93       166     2012      06        29        181              0.181750      20.555756       3.615109       0.279743       0.296000   -9999.000000       0.126600       1.000000
53865     53865     shanxi         111.5869       36.6525           93       166     2012      06        30        182              0.192417      22.596649       0.000000       0.298667       0.210000       0.142000       0.110700   -9999.000000
53865     53865     shanxi         111.5869       36.6525           93       166     2012      07        01        183              0.195083      24.958771       0.000000       0.262673       0.229000       0.128200   -9999.000000       0.683000
53865     53865     shanxi         111.5869       36.6525           93       166     2012      07        02        184              0.194833      27.079315       0.735809       0.240762       0.215000   -9999.000000       0.124100       0.665000
53865     53865     shanxi         111.5869       36.6525           93       166     2012      07        03        185              0.192167      26.622162      11.019509       0.228724       0.177000       0.391000       0.109100       0.633000
53865     53865     shanxi         111.5869       36.6525           93       166     2012      07        04        186              0.187875      26.632355       0.098824       0.214465       0.197000   -9999.000000       0.121900       0.469000
53865     53865     shanxi         111.5869       36.6525           93       166     2012      07        05        187              0.185792      24.463898       0.631327       0.207166       0.149000   -9999.000000       0.108300   -9999.000000
53865     53865     shanxi         111.5869       36.6525           93       166     2012      07        06        188              0.182000      27.892548       0.207759       0.194216   -9999.000000       0.226600       0.106600       0.561000
53865     53865     shanxi         111.5869       36.6525           93       166     2012      07        07        189              0.176792      27.482727       0.100287       0.185166   -9999.000000   -9999.000000   -9999.000000       0.530000
53865     53865     shanxi         111.5869       36.6525           93       166     2012      07        08        190              0.205167      25.884857      42.790451       0.181769   -9999.000000       0.210400       0.147800       0.878000
53865     53865     shanxi         111.5869       36.6525           93       166     2012      07        09        191              0.265042      22.362640       6.590882       0.327217       0.291500   -9999.000000       0.172900       1.000000
53865     53865     shanxi         111.5869       36.6525           93       166     2012      07        10        192              0.259083      22.480591       1.124019       0.327016       0.221000   -9999.000000       0.166000   -9999.000000
53865     53865     shanxi         111.5869       36.6525           93       166     2012      07        11        193              0.249000      26.851654       0.000000       0.297567   -9999.000000       0.328100       0.152800       0.962000
53865     53865     shanxi         111.5869       36.6525           93       166     2012      07        12        194              0.239083      26.716614       0.000000       0.279779       0.250000   -9999.000000       0.144500       0.603000
53865     53865     shanxi         111.5869       36.6525           93       166     2012      07        13        195              0.230292      26.607910      18.216471       0.264079       0.294000       0.324800   -9999.000000       0.680000
53865     53865     shanxi         111.5869       36.6525           93       166     2012      07        14        196              0.225958      24.009521       7.468182       0.322589       0.219000   -9999.000000       0.143900       0.688000
53865     53865     shanxi         111.5869       36.6525           93       166     2012      07        15        197              0.222208      24.410492       2.470245       0.304920       0.246000   -9999.000000       0.167800   -9999.000000
53865     53865     shanxi         111.5869       36.6525           93       166     2012      07        16        198              0.221500      22.584351       0.000000       0.313980       0.200000       0.219000       0.175400       0.851000
53865     53865     shanxi         111.5869       36.6525           93       166     2012      07        17        199              0.179292      23.530090       0.000000       0.294658   -9999.000000   -9999.000000       0.168400       0.685000
53865     53865     shanxi         111.5869       36.6525           93       166     2012      07        18        200              0.145250      23.891937       0.000000       0.282847       0.253000       0.140900   -9999.000000       0.680000
53865     53865     shanxi         111.5869       36.6525           93       166     2012      07        19        201              0.141417      24.185547       0.000000       0.273616       0.188500       0.083600       0.168800       0.562000
53865     53865     shanxi         111.5869       36.6525           93       166     2012      07        20        202              0.137217      25.315460       0.445456       0.264409       0.187500   -9999.000000       0.161600   -9999.000000
53865     53865     shanxi         111.5869       36.6525           93       166     2012      07        21        203              0.132913      25.977325      13.511132       0.260499   -9999.000000       0.168500       0.193300       0.942000
53865     53865     shanxi         111.5869       36.6525           93       166     2012      07        22        204              0.130000      22.888031       0.000000       0.307418       0.210000   -9999.000000       0.166900   -9999.000000
53865     53865     shanxi         111.5869       36.6525           93       166     2012      07        23        205              0.126000      24.268921       1.633710       0.285020       0.276000   -9999.000000       0.131200       0.676000
53865     53865     shanxi         111.5869       36.6525           93       166     2012      07        24        206              0.126000      23.830750       6.249666       0.280042       0.301000       0.300200   -9999.000000       0.847000
53865     53865     shanxi         111.5869       36.6525           93       166     2012      07        25        207              0.126000      22.277527       0.776405       0.304416       0.278000   -9999.000000       0.142400   -9999.000000
53865     53865     shanxi         111.5869       36.6525           93       166     2012      07        26        208              0.126833      24.892944       7.234963       0.289521       0.254000   -9999.000000       0.157800       0.993000
53865     53865     shanxi         111.5869       36.6525           93       166     2012      07        27        209              0.124750      25.513184       0.378221       0.307992       0.197000   -9999.000000       0.138600   -9999.000000
53865     53865     shanxi         111.5869       36.6525           93       166     2012      07        28        210              0.119375      26.506042       0.817446       0.287933       0.261000       0.152600       0.134400       0.591000
53865     53865     shanxi         111.5869       36.6525           93       166     2012      07        29        211              0.112625      27.795593       0.913043       0.277843       0.257000       0.275500       0.125300   -9999.000000
53865     53865     shanxi         111.5869       36.6525           93       166     2012      07        30        212              0.140250      28.297943      80.943199       0.269697       0.241000   -9999.000000   -9999.000000       0.783000
53865     53865     shanxi         111.5869       36.6525           93       166     2012      07        31        213              0.211583      24.564331      10.970792       0.366283       0.343000       0.182900       0.159500       0.990000
53865     53865     shanxi         111.5869       36.6525           93       166     2012      08        01        214              0.203250      21.828278       0.213593       0.355937       0.265000   -9999.000000       0.169600       0.967000
53865     53865     shanxi         111.5869       36.6525           93       166     2012      08        02        215              0.195000      23.403625       0.165358       0.332672       0.231000       0.119200       0.158700       0.898000
53865     53865     shanxi         111.5869       36.6525           93       166     2012      08        03        216              0.188348      25.381836       0.000000       0.320358       0.278000       0.090900       0.163500   -9999.000000
53865     53865     shanxi         111.5869       36.6525           93       166     2012      08        04        217              0.180500      25.074310       0.470168       0.312035       0.254000   -9999.000000   -9999.000000       0.870000
53865     53865     shanxi         111.5869       36.6525           93       166     2012      08        05        218              0.175417      25.626678       0.973416       0.305593       0.167000       0.200100       0.158300       0.804000
53865     53865     shanxi         111.5869       36.6525           93       166     2012      08        06        219              0.170667      23.751556       0.000000       0.306945       0.189000   -9999.000000       0.158600       0.780000
53865     53865     shanxi         111.5869       36.6525           93       166     2012      08        07        220              0.166167      24.973907       0.000000       0.301486       0.176000   -9999.000000       0.149400       0.681000
53865     53865     shanxi         111.5869       36.6525           93       166     2012      08        08        221              0.161667      26.813019       0.861464       0.293670       0.267000       0.197900       0.155900   -9999.000000
53865     53865     shanxi         111.5869       36.6525           93       166     2012      08        09        222              0.158833      26.430573       0.220205       0.292611       0.244000   -9999.000000       0.165100       0.802000
53865     53865     shanxi         111.5869       36.6525           93       166     2012      08        10        223              0.158833      23.403351       0.000000       0.290496       0.186500       0.219500   -9999.000000       0.660000
53865     53865     shanxi         111.5869       36.6525           93       166     2012      08        11        224              0.157833      24.592010       2.377322       0.282225       0.232500       0.017600       0.167600       0.681000
53865     53865     shanxi         111.5869       36.6525           93       166     2012      08        12        225              0.154375      25.603973       0.236379       0.283731       0.254000   -9999.000000       0.170300       0.602000
53865     53865     shanxi         111.5869       36.6525           93       166     2012      08        13        226              0.151000      23.292633       9.015199       0.288600       0.192000       0.323200       0.133400   -9999.000000
53865     53865     shanxi         111.5869       36.6525           93       166     2012      08        14        227              0.188458      22.454559      12.619995       0.296230       0.314000   -9999.000000       0.155400       0.936000
53865     53865     shanxi         111.5869       36.6525           93       166     2012      08        15        228              0.189917      21.243286       0.000000       0.333366       0.241500       0.239400       0.144300       0.722000
53865     53865     shanxi         111.5869       36.6525           93       166     2012      08        16        229              0.180583      24.025970       0.000000       0.306745       0.218500       0.303800       0.155000       0.804000
53865     53865     shanxi         111.5869       36.6525           93       166     2012      08        17        230              0.180750      23.576599      38.690868       0.298925       0.298000   -9999.000000       0.144300       0.976000
53865     53865     shanxi         111.5869       36.6525           93       166     2012      08        18        231              0.200167      21.482849       4.254413       0.359319   -9999.000000       0.296100       0.159500   -9999.000000
53865     53865     shanxi         111.5869       36.6525           93       166     2012      08        19        232              0.192250      21.513397       0.049331       0.340963       0.312000   -9999.000000       0.143300       0.849000
53865     53865     shanxi         111.5869       36.6525           93       166     2012      08        20        233              0.184833      22.932220       0.662047       0.321565       0.271000       0.234400       0.182500       0.855000
53865     53865     shanxi         111.5869       36.6525           93       166     2012      08        21        234              0.177083      23.153229       0.000000       0.314604       0.219500       0.276700   -9999.000000       0.814000
53865     53865     shanxi         111.5869       36.6525           93       166     2012      08        22        235              0.170583      20.580475       0.000000       0.304318       0.211000   -9999.000000       0.166700   -9999.000000
53865     53865     shanxi         111.5869       36.6525           93       166     2012      08        23        236              0.165739      20.378296       0.000000       0.298725       0.179000       0.229700       0.165800   -9999.000000
53865     53865     shanxi         111.5869       36.6525           93       166     2012      08        24        237              0.163250      19.764008       0.000000       0.294895   -9999.000000   -9999.000000       0.180700       0.693000
53865     53865     shanxi         111.5869       36.6525           93       166     2012      08        25        238              0.000000      21.187408       0.000000       0.290315       0.245000   -9999.000000       0.163600   -9999.000000
53865     53865     shanxi         111.5869       36.6525           93       166     2012      08        26        239              0.158750      21.726746       0.000000       0.288453       0.245000       0.136800       0.162400       0.629000
53865     53865     shanxi         111.5869       36.6525           93       166     2012      08        27        240              0.156875      22.151215       2.749012       0.287020       0.201500   -9999.000000   -9999.000000   -9999.000000
53865     53865     shanxi         111.5869       36.6525           93       166     2012      08        28        241              0.155417      23.113007       0.453442       0.289813       0.172000       0.032600       0.111800       0.675000
53865     53865     shanxi         111.5869       36.6525           93       166     2012      08        29        242              0.153750      23.983002       0.000000       0.284427       0.185000       0.018200       0.122000       0.532000
53865     53865     shanxi         111.5869       36.6525           93       166     2012      08        30        243              0.150708      24.181152       0.000000       0.275819       0.232000       0.194500       0.110700       0.685000
53865     53865     shanxi         111.5869       36.6525           93       166     2012      08        31        244              0.145875      23.321259       7.660446       0.271000   -9999.000000       0.140000       0.120900       0.513000
53865     53865     shanxi         111.5869       36.6525           93       166     2012      09        01        245              0.179500      21.153320      48.375710       0.287148       0.334000   -9999.000000   -9999.000000   -9999.000000
53865     53865     shanxi         111.5869       36.6525           93       166     2012      09        02        246              0.189167      18.230347       0.000000       0.367066       0.279000       0.283800       0.134700       0.902000
53865     53865     shanxi         111.5869       36.6525           93       166     2012      09        03        247              0.179667      19.147949       0.000000       0.327973       0.235000       0.176900       0.127400       0.719000
53865     53865     shanxi         111.5869       36.6525           93       166     2012      09        04        248              0.171667      19.217560       0.766837       0.315242       0.306000       0.183000       0.160500       0.779000
53865     53865     shanxi         111.5869       36.6525           93       166     2012      09        05        249              0.169000      19.791687      30.947662       0.309134   -9999.000000       0.248300       0.136400       0.785000
53865     53865     shanxi         111.5869       36.6525           93       166     2012      09        06        250              0.181583      18.478516      19.347019       0.336199       0.341000   -9999.000000       0.151400   -9999.000000
53865     53865     shanxi         111.5869       36.6525           93       166     2012      09        07        251              0.181000      16.907806       0.000000       0.358516       0.310500       0.290500   -9999.000000       0.959000
53865     53865     shanxi         111.5869       36.6525           93       166     2012      09        08        252              0.176917      19.808502       2.590226       0.330138       0.259000       0.308100       0.144800       0.827000
53865     53865     shanxi         111.5869       36.6525           93       166     2012      09        09        253              0.171000      20.805695       0.000000       0.320804       0.254000   -9999.000000       0.140900       0.908000
53865     53865     shanxi         111.5869       36.6525           93       166     2012      09        10        254              0.167167      20.641266       6.384223       0.313545       0.330000       0.389300       0.135000       0.823000
53865     53865     shanxi         111.5869       36.6525           93       166     2012      09        11        255              0.169083      17.839752       0.467619       0.326933       0.240500   -9999.000000       0.121900   -9999.000000
53865     53865     shanxi         111.5869       36.6525           93       166     2012      09        12        256              0.163500      19.004211       0.000000       0.316059       0.228500   -9999.000000       0.120200       0.656000
53865     53865     shanxi         111.5869       36.6525           93       166     2012      09        13        257              0.158667      14.951508       0.851910       0.308777       0.190000       0.168500   -9999.000000       0.669000
53865     53865     shanxi         111.5869       36.6525           93       166     2012      09        14        258              0.154375      15.797272       0.000000       0.303814       0.186000   -9999.000000       0.108000       0.788000
53865     53865     shanxi         111.5869       36.6525           93       166     2012      09        15        259              0.151750      16.802002       0.000000       0.300831       0.232000       0.176500       0.123400       0.493000
53865     53865     shanxi         111.5869       36.6525           93       166     2012      09        16        260              0.149167      17.016815       0.000000       0.297263       0.242000       0.099600       0.108100   -9999.000000
53865     53865     shanxi         111.5869       36.6525           93       166     2012      09        17        261              0.145625      17.122467       1.061538       0.294445       0.194500   -9999.000000       0.096200       0.606000
53865     53865     shanxi         111.5869       36.6525           93       166     2012      09        18        262              0.143500      16.930573       1.054525       0.294193       0.234000       0.181100   -9999.000000       0.671000
53865     53865     shanxi         111.5869       36.6525           93       166     2012      09        19        263              0.142167      17.248596       0.141850       0.296483   -9999.000000   -9999.000000       0.101000       0.505000
53865     53865     shanxi         111.5869       36.6525           93       166     2012      09        20        264              0.141000      18.013916       2.409600       0.292232       0.292000       0.138000       0.106600       0.523000
53865     53865     shanxi         111.5869       36.6525           93       166     2012      09        21        265              0.141000      17.978760       0.570959       0.294375   -9999.000000       0.067900       0.105900   -9999.000000
53865     53865     shanxi         111.5869       36.6525           93       166     2012      09        22        266              0.140750      16.277313       0.000000       0.300896       0.214500   -9999.000000       0.091400       0.639000
53865     53865     shanxi         111.5869       36.6525           93       166     2012      09        23        267              0.139000      18.773895       0.000000       0.291478       0.195500       0.368900       0.094000   -9999.000000
53865     53865     shanxi         111.5869       36.6525           93       166     2012      09        24        268              0.137625      18.895905       0.857841       0.286981       0.184000   -9999.000000   -9999.000000       0.558000
53865     53865     shanxi         111.5869       36.6525           93       166     2012      09        25        269              0.135000      18.202240       7.592701       0.285673   -9999.000000       0.313300       0.118400   -9999.000000
53865     53865     shanxi         111.5869       36.6525           93       166     2012      09        26        270              0.135250      16.087494       0.000000       0.311781       0.257000       0.271200       0.126000       0.786000
53865     53865     shanxi         111.5869       36.6525           93       166     2012      09        27        271              0.135000      16.841492       0.000000       0.300024       0.257000   -9999.000000       0.108700       0.587000
53865     53865     shanxi         111.5869       36.6525           93       166     2012      09        28        272              0.129800      14.963654       0.000000       0.290134       0.214000   -9999.000000       0.113400       0.677000
53865     53865     shanxi         111.5869       36.6525           93       166     2012      09        29        273              0.127667      13.502502       0.000000       0.285668       0.193000   -9999.000000       0.115900       0.467000
53865     53865     shanxi         111.5869       36.6525           93       166     2012      09        30        274              0.125750      14.031647       0.000000       0.282486       0.201000       0.327000   -9999.000000   -9999.000000
53865     53865     shanxi         111.5869       36.6525           93       166     2012      10        01        275              0.123750      14.697632       0.000000       0.280073       0.211000   -9999.000000       0.093000       0.641000
53865     53865     shanxi         111.5869       36.6525           93       166     2012      10        02        276              0.122125      15.833160       0.000000       0.277452       0.200000   -9999.000000       0.111500       0.600000
53865     53865     shanxi         111.5869       36.6525           93       166     2012      10        03        277              0.121000      16.826965       0.000000       0.276209       0.180000       0.086400       0.098400       0.709000
53865     53865     shanxi         111.5869       36.6525           93       166     2012      10        04        278              0.116333      17.004364       2.901236       0.273924       0.215000       0.158100       0.120700       0.632000
53865     53865     shanxi         111.5869       36.6525           93       166     2012      10        05        279              0.117833      14.124969       0.000000       0.288145       0.180000       0.190700   -9999.000000   -9999.000000
53865     53865     shanxi         111.5869       36.6525           93       166     2012      10        06        280              0.118333      14.423035       0.000000       0.280212       0.184000   -9999.000000       0.105500       0.629000
53865     53865     shanxi         111.5869       36.6525           93       166     2012      10        07        281              0.118333      15.014282       0.000000       0.275922       0.202000   -9999.000000       0.103600       0.578000
53865     53865     shanxi         111.5869       36.6525           93       166     2012      10        08        282              0.117667      14.121887       0.317377       0.275514       0.190500       0.193500       0.109000       0.684000
53865     53865     shanxi         111.5869       36.6525           93       166     2012      10        09        283              0.115375      14.705048       0.000000       0.274866       0.178500       0.082500       0.094600       0.388000
53865     53865     shanxi         111.5869       36.6525           93       166     2012      10        10        284              0.112833      13.118286       0.000000       0.270522       0.158000       0.330500       0.105800   -9999.000000
53865     53865     shanxi         111.5869       36.6525           93       166     2012      10        11        285              0.111583      13.596985       0.000000       0.268645       0.115000   -9999.000000   -9999.000000       0.487000
53865     53865     shanxi         111.5869       36.6525           93       166     2012      10        12        286              0.111000      14.356201       0.000000       0.268226       0.142000   -9999.000000       0.091600       0.524000
53865     53865     shanxi         111.5869       36.6525           93       166     2012      10        13        287              0.109125      14.788757       0.000000       0.266448       0.144000   -9999.000000       0.108800       0.648000
53865     53865     shanxi         111.5869       36.6525           93       166     2012      10        14        288              0.107333      14.875092       0.389626       0.263875       0.123000       0.144400       0.086700       0.516000
53865     53865     shanxi         111.5869       36.6525           93       166     2012      10        15        289              0.106000      14.105621       0.375876       0.265301       0.142500   -9999.000000       0.096700   -9999.000000
53865     53865     shanxi         111.5869       36.6525           93       166     2012      10        16        290              0.102125      11.202118       0.000000       0.271069       0.132000       0.156200       0.092900       0.379000
53865     53865     shanxi         111.5869       36.6525           93       166     2012      10        17        291              0.098917       9.011566       0.000000       0.266336   -9999.000000   -9999.000000   -9999.000000       0.513000
53865     53865     shanxi         111.5869       36.6525           93       166     2012      10        18        292              0.138583       9.699799       0.000000       0.263828       0.153000       0.053600       0.085000       0.502000
53865     53865     shanxi         111.5869       36.6525           93       166     2012      10        19        293              0.141917      11.536316       0.000000       0.263882       0.134000       0.511400       0.098600       0.265000
53865     53865     shanxi         111.5869       36.6525           93       166     2012      10        20        294              0.142000      12.464294       0.000000       0.262412       0.128500   -9999.000000       0.086800   -9999.000000
53865     53865     shanxi         111.5869       36.6525           93       166     2012      10        21        295              0.139792      14.021545       1.524682       0.261287       0.155000       0.334900       0.103800       0.461000
53865     53865     shanxi         111.5869       36.6525           93       166     2012      10        22        296              0.136750       7.978699       0.658515       0.272663   -9999.000000   -9999.000000   -9999.000000   -9999.000000
53865     53865     shanxi         111.5869       36.6525           93       166     2012      10        23        297              0.135500       8.416779       0.000000       0.266781   -9999.000000   -9999.000000       0.081200       0.484000
53865     53865     shanxi         111.5869       36.6525           93       166     2012      10        24        298              0.134875       8.339142       0.000000       0.266033   -9999.000000       0.150600       0.081500   -9999.000000
53865     53865     shanxi         111.5869       36.6525           93       166     2012      10        25        299              0.000000      10.104401       0.000000       0.264074       0.128500   -9999.000000       0.090200       0.504000
53865     53865     shanxi         111.5869       36.6525           93       166     2012      10        26        300              0.135875      10.904510       0.439441       0.262314       0.147000       0.080600       0.081200       0.450000
53865     53865     shanxi         111.5869       36.6525           93       166     2012      10        27        301              0.135250       9.291962       0.000000       0.264553       0.126000       0.021500       0.086400       0.656000
53865     53865     shanxi         111.5869       36.6525           93       166     2012      10        28        302              0.000000      11.262268       0.086912       0.262598       0.143000   -9999.000000   -9999.000000       0.489000
53865     53865     shanxi         111.5869       36.6525           93       166     2012      10        29        303              0.135375      11.337860       0.000000       0.261417   -9999.000000   -9999.000000       0.063600   -9999.000000
53865     53865     shanxi         111.5869       36.6525           93       166     2012      10        30        304              0.131917       9.131897       0.000000       0.259702       0.112000   -9999.000000       0.080700       0.419000
53865     53865     shanxi         111.5869       36.6525           93       166     2012      10        31        305              0.130167       6.762054       0.000000       0.257758       0.124000   -9999.000000       0.067100       0.383000
53865     53865     shanxi         111.5869       36.6525           93       166     2012      11        01        306              0.129500       7.408661       0.000000       0.257036       0.106000       0.291400       0.076800       0.614000
53865     53865     shanxi         111.5869       36.6525           93       166     2012      11        02        307              0.129875       8.313843       2.875280       0.257465       0.117000   -9999.000000   -9999.000000       0.407000
53865     53865     shanxi         111.5869       36.6525           93       166     2012      11        03        308              0.126208       9.818909       1.563423       0.264031   -9999.000000   -9999.000000       0.074500   -9999.000000
53865     53865     shanxi         111.5869       36.6525           93       166     2012      11        04        309              0.122500       1.987274       0.987387       0.233941   -9999.000000   -9999.000000       0.068900       0.569000
53865     53865     shanxi         111.5869       36.6525           93       166     2012      11        05        310              0.122167       0.190399       0.000000       0.205184       0.133000   -9999.000000       0.072200       0.397000
53865     53865     shanxi         111.5869       36.6525           93       166     2012      11        06        311              0.123958       3.138947       0.000000       0.249624       0.144000       0.133200       0.074900       0.691000
53865     53865     shanxi         111.5869       36.6525           93       166     2012      11        07        312              0.124625       5.776825       0.100186       0.265293       0.143000   -9999.000000       0.080500       0.367000
53865     53865     shanxi         111.5869       36.6525           93       166     2012      11        08        313              0.125000       4.059753       0.000000       0.263824   -9999.000000       0.125900   -9999.000000   -9999.000000
53865     53865     shanxi         111.5869       36.6525           93       166     2012      11        09        314              0.126000       5.575073       1.830653       0.265017   -9999.000000   -9999.000000       0.079200       0.610000
53865     53865     shanxi         111.5869       36.6525           93       166     2012      11        10        315              0.123125       3.935913       0.569036       0.272855   -9999.000000   -9999.000000       0.068800       0.331000
53865     53865     shanxi         111.5869       36.6525           93       166     2012      11        11        316              0.121583       1.715668       0.000000       0.243048       0.129000   -9999.000000       0.071300       0.510000
53865     53865     shanxi         111.5869       36.6525           93       166     2012      11        12        317              0.121750       1.368591       1.173850       0.223521       0.125000   -9999.000000       0.065200       0.280000
53865     53865     shanxi         111.5869       36.6525           93       166     2012      11        13        318              0.000000       2.518250       0.000000       0.244517   -9999.000000   -9999.000000       0.068100   -9999.000000
53865     53865     shanxi         111.5869       36.6525           93       166     2012      11        14        319              0.122500       3.120941       0.000000       0.245698   -9999.000000       0.049000   -9999.000000       0.377000
53865     53865     shanxi         111.5869       36.6525           93       166     2012      11        15        320              0.123000       3.956360       0.544494       0.259070   -9999.000000   -9999.000000       0.054000   -9999.000000
53865     53865     shanxi         111.5869       36.6525           93       166     2012      11        16        321              0.122583       2.090698       0.000000       0.255929       0.114000   -9999.000000       0.066200       0.183000
53865     53865     shanxi         111.5869       36.6525           93       166     2012      11        17        322              0.000000       2.509094       0.000000       0.240392       0.137000   -9999.000000       0.063400       0.323000
53865     53865     shanxi         111.5869       36.6525           93       166     2012      11        18        323              0.122500       4.079498       0.000000       0.258235       0.135000   -9999.000000       0.071500   -9999.000000
53865     53865     shanxi         111.5869       36.6525           93       166     2012      11        19        324              0.122500       3.954407       0.000000       0.254191   -9999.000000       0.101400   -9999.000000       0.313000
53865     53865     shanxi         111.5869       36.6525           93       166     2012      11        20        325              0.123000       4.042297       0.041192       0.261186       0.137000   -9999.000000       0.069200   -9999.000000
53865     53865     shanxi         111.5869       36.6525           93       166     2012      11        21        326              0.125000       3.954498       0.000000       0.267930       0.104000       0.087900       0.058000       0.322000
53865     53865     shanxi         111.5869       36.6525           93       166     2012      11        22        327              0.123000       4.990509       0.000000       0.268968   -9999.000000   -9999.000000       0.062800   -9999.000000
53865     53865     shanxi         111.5869       36.6525           93       166     2012      11        23        328              0.122167       1.742737       0.000000       0.242630       0.104000       0.092400       0.056100       0.309000
53865     53865     shanxi         111.5869       36.6525           93       166     2012      11        24        329              0.122083       0.743805       0.000000       0.212169   -9999.000000       0.128500       0.064900       0.363000
53865     53865     shanxi         111.5869       36.6525           93       166     2012      11        25        330              0.122417       1.911591       0.000000       0.238723   -9999.000000       0.188200   -9999.000000       0.372000
53865     53865     shanxi         111.5869       36.6525           93       166     2012      11        26        331              0.121000       0.417816       0.000000       0.214092       0.096000       0.071000   -9999.000000       0.068000
53865     53865     shanxi         111.5869       36.6525           93       166     2012      11        27        332              0.120750       0.170288       0.000000       0.201751       0.111000       0.047900       0.052800   -9999.000000
53865     53865     shanxi         111.5869       36.6525           93       166     2012      11        28        333              0.119625       0.739746       0.000000       0.211856   -9999.000000       0.171700       0.048300       0.248000
53865     53865     shanxi         111.5869       36.6525           93       166     2012      11        29        334              0.118000      -0.833313       0.000000       0.188098       0.106000       0.082700       0.053000       0.148000
53865     53865     shanxi         111.5869       36.6525           93       166     2012      11        30        335              0.118000      -0.512756       0.048448       0.189631   -9999.000000   -9999.000000       0.053600       0.353000
53865     53865     shanxi         111.5869       36.6525           93       166     2012      12        01        336              0.118000       0.355621       0.662731       0.200710   -9999.000000       0.128100   -9999.000000       0.073000
53865     53865     shanxi         111.5869       36.6525           93       166     2012      12        02        337              0.119000      -1.431793       0.362372       0.169559   -9999.000000       0.015100       0.042800   -9999.000000
53865     53865     shanxi         111.5869       36.6525           93       166     2012      12        03        338              0.118000      -0.509613       0.000000       0.194254       0.096000       0.114600       0.056600       0.308000
53865     53865     shanxi         111.5869       36.6525           93       166     2012      12        04        339              0.118000      -1.736755       0.000000       0.173786       0.101000       0.147900       0.050400       0.231000
53865     53865     shanxi         111.5869       36.6525           93       166     2012      12        05        340              0.118000      -0.051208       0.000000       0.198422   -9999.000000   -9999.000000       0.053500       0.220000
53865     53865     shanxi         111.5869       36.6525           93       166     2012      12        06        341              0.116833      -2.668518       0.048534       0.163805   -9999.000000   -9999.000000   -9999.000000       0.059000
53865     53865     shanxi         111.5869       36.6525           93       166     2012      12        07        342              0.116750      -0.660004       0.000000       0.188686   -9999.000000       0.071800       0.049300   -9999.000000
53865     53865     shanxi         111.5869       36.6525           93       166     2012      12        08        343              0.116000      -2.128845       0.000000       0.173821   -9999.000000   -9999.000000       0.047700       0.020000
53865     53865     shanxi         111.5869       36.6525           93       166     2012      12        09        344              0.113125      -3.517914       0.207690       0.157525       0.100000   -9999.000000       0.055800       0.050000
53865     53865     shanxi         111.5869       36.6525           93       166     2012      12        10        345              0.111083      -1.878235       0.000000       0.176673   -9999.000000   -9999.000000       0.050700       0.353000
53865     53865     shanxi         111.5869       36.6525           93       166     2012      12        11        346              0.106708      -1.593262       0.000000       0.179982   -9999.000000       0.192600       0.052000       0.010000
53865     53865     shanxi         111.5869       36.6525           93       166     2012      12        12        347              0.100167      -2.508423       0.174947       0.169260       0.088000   -9999.000000   -9999.000000   -9999.000000
53865     53865     shanxi         111.5869       36.6525           93       166     2012      12        13        348              0.098000      -1.958649       0.584968       0.171925   -9999.000000       0.140900       0.048500       0.011000
53865     53865     shanxi         111.5869       36.6525           93       166     2012      12        14        349              0.101333      -2.607147       0.044453       0.153466   -9999.000000       0.028900       0.056000       0.298000
53865     53865     shanxi         111.5869       36.6525           93       166     2012      12        15        350              0.000000      -1.149170       0.132731       0.173578   -9999.000000       0.027100       0.049900       0.114000
53865     53865     shanxi         111.5869       36.6525           93       166     2012      12        16        351              0.112375      -1.309235       0.000000       0.169021   -9999.000000   -9999.000000       0.059500       0.192000
53865     53865     shanxi         111.5869       36.6525           93       166     2012      12        17        352              0.115000      -0.865662       0.000000       0.178672   -9999.000000       0.125400   -9999.000000   -9999.000000
53865     53865     shanxi         111.5869       36.6525           93       166     2012      12        18        353              0.109958      -2.039886       0.049461       0.178646       0.090000       0.097100       0.053700       0.089000
53865     53865     shanxi         111.5869       36.6525           93       166     2012      12        19        354              0.101458      -2.902008       0.944986       0.163187   -9999.000000       0.111000       0.044500   -9999.000000
53865     53865     shanxi         111.5869       36.6525           93       166     2012      12        20        355              0.000000      -2.967865       0.993115       0.153089   -9999.000000       0.040000       0.052600       0.009000
53865     53865     shanxi         111.5869       36.6525           93       166     2012      12        21        356              0.095917      -3.855225       0.044285       0.145115   -9999.000000   -9999.000000       0.045700   -9999.000000
53865     53865     shanxi         111.5869       36.6525           93       166     2012      12        22        357              0.081458      -4.561493       0.103670       0.151271   -9999.000000   -9999.000000       0.048500       0.109000
53865     53865     shanxi         111.5869       36.6525           93       166     2012      12        23        358              0.058417      -8.382965       0.000000       0.132609   -9999.000000   -9999.000000   -9999.000000       0.042000
53865     53865     shanxi         111.5869       36.6525           93       166     2012      12        24        359              0.050500      -9.246429       0.000000       0.128711   -9999.000000   -9999.000000       0.047400       0.136000
53865     53865     shanxi         111.5869       36.6525           93       166     2012      12        25        360              0.050125      -5.829559       0.000000       0.139389   -9999.000000   -9999.000000       0.046500       0.084000
53865     53865     shanxi         111.5869       36.6525           93       166     2012      12        26        361              0.000000      -5.549225       0.000000       0.139214   -9999.000000   -9999.000000       0.055100   -9999.000000
53865     53865     shanxi         111.5869       36.6525           93       166     2012      12        27        362              0.047000      -4.920135       0.000000       0.140764   -9999.000000   -9999.000000       0.045800       0.092000
53865     53865     shanxi         111.5869       36.6525           93       166     2012      12        28        363              0.045000      -4.348358       0.092641       0.149125   -9999.000000   -9999.000000       0.050200       0.043000
53865     53865     shanxi         111.5869       36.6525           93       166     2012      12        29        364              0.000000      -5.433624       0.000000       0.143708   -9999.000000   -9999.000000   -9999.000000       0.181000
53865     53865     shanxi         111.5869       36.6525           93       166     2012      12        30        365              0.000000      -9.138916       0.000000       0.130699   -9999.000000   -9999.000000       0.039900       0.052000
53865     53865     shanxi         111.5869       36.6525           93       166     2012      12        31        366              0.039667      -7.244904       0.000000       0.131190   -9999.000000   -9999.000000       0.048100   -9999.000000
