# Supplementary material for: Research on Fusing Multisatellite Soil Moisture Data Based on Bayesian Model Averaging
Source: Hindawi journal article supplement (doi:10.1155/2018/9310838), 2018-06-25
Supplement: f1 [file 9310838.f1.zip › 2012_sm00-10cm_daily_ZDB_ZHY_53872_366days_allin.txt]

53872     53872     shanxi         112.6833       36.7500           93       171     2012      01        01        001              0.000000   -9999.000000       2.853313   -9999.000000       0.128000   -9999.000000       0.026500   -9999.000000
53872     53872     shanxi         112.6833       36.7500           93       171     2012      01        02        002              0.086917      -5.302734       2.393865       0.160082   -9999.000000       0.089900       0.032400       0.046000
53872     53872     shanxi         112.6833       36.7500           93       171     2012      01        03        003              0.000000      -5.646088       1.917533       0.153169   -9999.000000   -9999.000000   -9999.000000       0.029000
53872     53872     shanxi         112.6833       36.7500           93       171     2012      01        04        004              0.076875      -6.236176       1.390964       0.146797   -9999.000000   -9999.000000       0.029200   -9999.000000
53872     53872     shanxi         112.6833       36.7500           93       171     2012      01        05        005              0.076958      -6.324890       4.673823       0.146269   -9999.000000   -9999.000000       0.032400       0.006000
53872     53872     shanxi         112.6833       36.7500           93       171     2012      01        06        006              0.077625      -5.891113       3.098703       0.152432   -9999.000000   -9999.000000       0.032300       0.004000
53872     53872     shanxi         112.6833       36.7500           93       171     2012      01        07        007              0.081708      -5.321655       4.266928       0.147080   -9999.000000       0.045900       0.033500       0.029000
53872     53872     shanxi         112.6833       36.7500           93       171     2012      01        08        008              0.000000      -4.425262       0.000000       0.143267   -9999.000000   -9999.000000       0.031700   -9999.000000
53872     53872     shanxi         112.6833       36.7500           93       171     2012      01        09        009              0.084292      -3.968750       0.000000       0.143909       0.140000   -9999.000000   -9999.000000   -9999.000000
53872     53872     shanxi         112.6833       36.7500           93       171     2012      01        10        010              0.081292      -3.725464       0.000000       0.157486   -9999.000000   -9999.000000       0.020800       0.022000
53872     53872     shanxi         112.6833       36.7500           93       171     2012      01        11        011              0.078500      -4.503540       0.000000       0.161025   -9999.000000   -9999.000000       0.030200   -9999.000000
53872     53872     shanxi         112.6833       36.7500           93       171     2012      01        12        012              0.079167      -5.347778       1.475475       0.159102       0.135000       0.120400       0.024300       0.014000
53872     53872     shanxi         112.6833       36.7500           93       171     2012      01        13        013              0.082083      -4.730743       2.600679       0.166251       0.137000   -9999.000000       0.026600   -9999.000000
53872     53872     shanxi         112.6833       36.7500           93       171     2012      01        14        014              0.084000      -4.540009       1.707769       0.165593   -9999.000000   -9999.000000   -9999.000000   -9999.000000
53872     53872     shanxi         112.6833       36.7500           93       171     2012      01        15        015              0.081125      -4.244659       0.000000       0.169012   -9999.000000       0.049500       0.028900   -9999.000000
53872     53872     shanxi         112.6833       36.7500           93       171     2012      01        16        016              0.081667      -4.539795       1.235235       0.163577   -9999.000000   -9999.000000       0.024700   -9999.000000
53872     53872     shanxi         112.6833       36.7500           93       171     2012      01        17        017              0.000000      -4.273285       1.080006       0.158277       0.134000       0.220500       0.026000       0.011000
53872     53872     shanxi         112.6833       36.7500           93       171     2012      01        18        018              0.087625      -3.197174       0.762803       0.173321       0.141000       0.020200       0.022200   -9999.000000
53872     53872     shanxi         112.6833       36.7500           93       171     2012      01        19        019              0.086500      -3.450439       5.567709       0.174795   -9999.000000   -9999.000000       0.026100   -9999.000000
53872     53872     shanxi         112.6833       36.7500           93       171     2012      01        20        020              0.089000      -3.843750       1.603036       0.155353   -9999.000000   -9999.000000   -9999.000000   -9999.000000
53872     53872     shanxi         112.6833       36.7500           93       171     2012      01        21        021              0.087625      -4.204926       1.629217       0.150386   -9999.000000   -9999.000000       0.023700       0.006000
53872     53872     shanxi         112.6833       36.7500           93       171     2012      01        22        022              0.082917      -5.460052       4.037671       0.146921   -9999.000000   -9999.000000       0.024800       0.011000
53872     53872     shanxi         112.6833       36.7500           93       171     2012      01        23        023              0.078708      -5.992462       0.478160       0.144858   -9999.000000   -9999.000000       0.022600   -9999.000000
53872     53872     shanxi         112.6833       36.7500           93       171     2012      01        24        024              0.075000      -5.733337       0.514566       0.144108   -9999.000000   -9999.000000   -9999.000000       0.022000
53872     53872     shanxi         112.6833       36.7500           93       171     2012      01        25        025              0.072708      -5.833618       2.322448       0.143685   -9999.000000   -9999.000000       0.023600       0.028000
53872     53872     shanxi         112.6833       36.7500           93       171     2012      01        26        026              0.073706      -5.459503       1.123541       0.144383   -9999.000000   -9999.000000   -9999.000000       0.045000
53872     53872     shanxi         112.6833       36.7500           93       171     2012      01        27        027              0.077000      -4.429474       0.000000       0.153500       0.138000   -9999.000000       0.024500       0.017000
53872     53872     shanxi         112.6833       36.7500           93       171     2012      01        28        028              0.079714      -3.508484       0.000000       0.165997       0.161000       0.081300       0.028500   -9999.000000
53872     53872     shanxi         112.6833       36.7500           93       171     2012      01        29        029              0.081136      -3.074554       0.069065       0.177749   -9999.000000   -9999.000000       0.023800       0.025000
53872     53872     shanxi         112.6833       36.7500           93       171     2012      01        30        030              0.084000      -3.566925       0.663078       0.166612   -9999.000000       0.044100       0.025100       0.029000
53872     53872     shanxi         112.6833       36.7500           93       171     2012      01        31        031              0.085870      -4.205536       0.000000       0.165618   -9999.000000       0.059400   -9999.000000       0.083000
53872     53872     shanxi         112.6833       36.7500           93       171     2012      02        01        032              0.080542      -1.718140       0.000000       0.203096   -9999.000000   -9999.000000       0.021600   -9999.000000
53872     53872     shanxi         112.6833       36.7500           93       171     2012      02        02        033              0.078167      -4.367371       0.000000       0.172556       0.130000   -9999.000000       0.023300   -9999.000000
53872     53872     shanxi         112.6833       36.7500           93       171     2012      02        03        034              0.081682      -5.259918       0.000000       0.163383       0.141000   -9999.000000       0.023100       0.025000
53872     53872     shanxi         112.6833       36.7500           93       171     2012      02        04        035              0.086435      -3.148804       0.000000       0.181331   -9999.000000   -9999.000000       0.024000       0.006000
53872     53872     shanxi         112.6833       36.7500           93       171     2012      02        05        036              0.092167      -2.771423       0.000000       0.179266   -9999.000000   -9999.000000       0.029700       0.128000
53872     53872     shanxi         112.6833       36.7500           93       171     2012      02        06        037              0.085625      -1.299103       0.000000       0.206738   -9999.000000   -9999.000000   -9999.000000   -9999.000000
53872     53872     shanxi         112.6833       36.7500           93       171     2012      02        07        038              0.079417      -4.763428       0.000000       0.175651   -9999.000000   -9999.000000       0.025000   -9999.000000
53872     53872     shanxi         112.6833       36.7500           93       171     2012      02        08        039              0.074652      -6.227722       0.000000       0.152636   -9999.000000   -9999.000000       0.026300       0.001000
53872     53872     shanxi         112.6833       36.7500           93       171     2012      02        09        040              0.078737      -7.181396       0.000000       0.145820   -9999.000000   -9999.000000       0.024400   -9999.000000
53872     53872     shanxi         112.6833       36.7500           93       171     2012      02        10        041              0.081391      -5.744659       0.000000       0.150432   -9999.000000   -9999.000000       0.027800       0.018000
53872     53872     shanxi         112.6833       36.7500           93       171     2012      02        11        042              0.087522      -4.713928       0.000000       0.176348   -9999.000000   -9999.000000       0.029400   -9999.000000
53872     53872     shanxi         112.6833       36.7500           93       171     2012      02        12        043              0.087455      -1.670746       0.000000       0.198386   -9999.000000   -9999.000000   -9999.000000   -9999.000000
53872     53872     shanxi         112.6833       36.7500           93       171     2012      02        13        044              0.086857      -3.291595       0.000000       0.176774       0.128000   -9999.000000   -9999.000000       0.025000
53872     53872     shanxi         112.6833       36.7500           93       171     2012      02        14        045              0.091182      -2.982269       0.000000       0.179699   -9999.000000   -9999.000000       0.032800   -9999.000000
53872     53872     shanxi         112.6833       36.7500           93       171     2012      02        15        046              0.093955      -0.555664       0.000000       0.213334       0.111000   -9999.000000       0.032900       0.012000
53872     53872     shanxi         112.6833       36.7500           93       171     2012      02        16        047              0.089545      -0.910431       0.000000       0.216454   -9999.000000   -9999.000000       0.031300   -9999.000000
53872     53872     shanxi         112.6833       36.7500           93       171     2012      02        17        048              0.085208      -3.485870       0.000000       0.191816   -9999.000000   -9999.000000   -9999.000000       0.001000
53872     53872     shanxi         112.6833       36.7500           93       171     2012      02        18        049              0.083333      -4.708374       0.000000       0.174739       0.115000   -9999.000000       0.030400       0.076000
53872     53872     shanxi         112.6833       36.7500           93       171     2012      02        19        050              0.088609      -4.499542       0.000000       0.182257       0.122000   -9999.000000       0.030600       0.131000
53872     53872     shanxi         112.6833       36.7500           93       171     2012      02        20        051              0.098739      -2.232574       0.000000       0.196996       0.121000   -9999.000000       0.031200       0.094000
53872     53872     shanxi         112.6833       36.7500           93       171     2012      02        21        052              0.106917       0.676117       0.000000       0.227335   -9999.000000   -9999.000000   -9999.000000   -9999.000000
53872     53872     shanxi         112.6833       36.7500           93       171     2012      02        22        053              0.116826       1.563416       0.000000       0.235581   -9999.000000   -9999.000000       0.038800       0.198000
53872     53872     shanxi         112.6833       36.7500           93       171     2012      02        23        054              0.129864       2.940521       0.000000       0.253571       0.097000   -9999.000000   -9999.000000       0.143000
53872     53872     shanxi         112.6833       36.7500           93       171     2012      02        24        055              0.135455       1.328796       0.000000       0.239072       0.105000   -9999.000000       0.030700       0.271000
53872     53872     shanxi         112.6833       36.7500           93       171     2012      02        25        056              0.136043       1.232269       0.000000       0.246589   -9999.000000   -9999.000000       0.029200       0.009000
53872     53872     shanxi         112.6833       36.7500           93       171     2012      02        26        057              0.124667      -1.083832       0.000000       0.199922   -9999.000000       0.075400       0.028800   -9999.000000
53872     53872     shanxi         112.6833       36.7500           93       171     2012      02        27        058              0.120958      -0.677826       0.166259       0.212580   -9999.000000   -9999.000000   -9999.000000       0.107000
53872     53872     shanxi         112.6833       36.7500           93       171     2012      02        28        059              0.127292       0.111481       0.000000       0.222211       0.096000       0.038300       0.034300       0.199000
53872     53872     shanxi         112.6833       36.7500           93       171     2012      02        29        060              0.000000   -9999.000000       0.000000   -9999.000000       0.108000   -9999.000000   -9999.000000   -9999.000000
53872     53872     shanxi         112.6833       36.7500           93       171     2012      03        01        061              0.173208       1.105499       0.115120       0.234513   -9999.000000   -9999.000000       0.022600       0.199000
53872     53872     shanxi         112.6833       36.7500           93       171     2012      03        02        062              0.181500       1.117035       0.045200       0.246076   -9999.000000   -9999.000000       0.028200   -9999.000000
53872     53872     shanxi         112.6833       36.7500           93       171     2012      03        03        063              0.183500       0.442627       0.000000       0.235140   -9999.000000   -9999.000000       0.033600       0.150000
53872     53872     shanxi         112.6833       36.7500           93       171     2012      03        04        064              0.191167      -0.490906       0.000000       0.213188       0.136000       0.066000       0.042300       0.328000
53872     53872     shanxi         112.6833       36.7500           93       171     2012      03        05        065              0.200750       0.977570       0.000000       0.234845       0.154000   -9999.000000   -9999.000000       0.493000
53872     53872     shanxi         112.6833       36.7500           93       171     2012      03        06        066              0.175250       1.189117       0.000000       0.235840       0.147000   -9999.000000       0.031400       0.098000
53872     53872     shanxi         112.6833       36.7500           93       171     2012      03        07        067              0.000000       0.621033       0.000000       0.227781       0.144000       0.018200       0.031700   -9999.000000
53872     53872     shanxi         112.6833       36.7500           93       171     2012      03        08        068              0.196667       3.333923       0.000000       0.253971   -9999.000000   -9999.000000       0.039100       0.240000
53872     53872     shanxi         112.6833       36.7500           93       171     2012      03        09        069              0.211958       2.394989       0.000000       0.249741   -9999.000000   -9999.000000       0.036500   -9999.000000
53872     53872     shanxi         112.6833       36.7500           93       171     2012      03        10        070              0.210583       2.365082       0.000000       0.245622       0.126000   -9999.000000       0.043700       0.183000
53872     53872     shanxi         112.6833       36.7500           93       171     2012      03        11        071              0.198417       3.649170       0.000000       0.249979       0.129000   -9999.000000   -9999.000000   -9999.000000
53872     53872     shanxi         112.6833       36.7500           93       171     2012      03        12        072              0.197667       2.830383       0.000000       0.242916       0.130000   -9999.000000       0.027700       0.282000
53872     53872     shanxi         112.6833       36.7500           93       171     2012      03        13        073              0.196625       2.893402       0.000000       0.246294   -9999.000000   -9999.000000       0.040400       0.282000
53872     53872     shanxi         112.6833       36.7500           93       171     2012      03        14        074              0.211130       5.342560       0.000000       0.256245   -9999.000000   -9999.000000   -9999.000000   -9999.000000
53872     53872     shanxi         112.6833       36.7500           93       171     2012      03        15        075              0.215250       5.711090       0.403563       0.259279   -9999.000000       0.091000       0.043000       0.311000
53872     53872     shanxi         112.6833       36.7500           93       171     2012      03        16        076              0.222333       2.313568       0.177063       0.259160       0.129000       0.131900   -9999.000000   -9999.000000
53872     53872     shanxi         112.6833       36.7500           93       171     2012      03        17        077              0.228375       6.572205       0.000000       0.268872       0.123000       0.065300       0.045500       0.337000
53872     53872     shanxi         112.6833       36.7500           93       171     2012      03        18        078              0.230833       8.889832       0.043470       0.278740   -9999.000000   -9999.000000       0.036400       0.354000
53872     53872     shanxi         112.6833       36.7500           93       171     2012      03        19        079              0.228167       6.677765       0.176874       0.265019   -9999.000000   -9999.000000       0.046800       0.341000
53872     53872     shanxi         112.6833       36.7500           93       171     2012      03        20        080              0.239500       1.991730       0.130155       0.255728       0.133000   -9999.000000       0.047100       0.301000
53872     53872     shanxi         112.6833       36.7500           93       171     2012      03        21        081              0.241583       5.872314       0.471298       0.276102       0.147000   -9999.000000       0.053700   -9999.000000
53872     53872     shanxi         112.6833       36.7500           93       171     2012      03        22        082              0.256958       2.329285       0.521088       0.265552   -9999.000000   -9999.000000   -9999.000000       0.519000
53872     53872     shanxi         112.6833       36.7500           93       171     2012      03        23        083              0.244208       3.268127       0.419103       0.276777       0.103000   -9999.000000       0.038800       0.264000
53872     53872     shanxi         112.6833       36.7500           93       171     2012      03        24        084              0.238792       4.670837       0.000000       0.262987   -9999.000000   -9999.000000   -9999.000000       0.480000
53872     53872     shanxi         112.6833       36.7500           93       171     2012      03        25        085              0.000000       7.423950       0.000000       0.265040       0.114000   -9999.000000       0.044700       0.375000
53872     53872     shanxi         112.6833       36.7500           93       171     2012      03        26        086              0.245083       8.613403       0.000000       0.266241       0.116000   -9999.000000       0.046400   -9999.000000
53872     53872     shanxi         112.6833       36.7500           93       171     2012      03        27        087              0.253208       9.770630       0.000000       0.262832       0.109000   -9999.000000       0.049800       0.414000
53872     53872     shanxi         112.6833       36.7500           93       171     2012      03        28        088              0.254833      10.513153       0.093108       0.260908       0.109000   -9999.000000   -9999.000000       0.447000
53872     53872     shanxi         112.6833       36.7500           93       171     2012      03        29        089              0.261583      11.343292       0.494020       0.261583       0.108000   -9999.000000       0.038000       0.427000
53872     53872     shanxi         112.6833       36.7500           93       171     2012      03        30        090              0.252250      12.394592       0.358656       0.260226   -9999.000000   -9999.000000       0.048700       0.159000
53872     53872     shanxi         112.6833       36.7500           93       171     2012      03        31        091              0.253833       7.203369       0.000000       0.259732       0.102000   -9999.000000       0.041200   -9999.000000
53872     53872     shanxi         112.6833       36.7500           93       171     2012      04        01        092              0.257667      10.932831       0.000000       0.252789       0.126000   -9999.000000       0.046400       0.413000
53872     53872     shanxi         112.6833       36.7500           93       171     2012      04        02        093              0.249125      12.208435       2.280657       0.248647       0.123000       0.023800   -9999.000000       0.241000
53872     53872     shanxi         112.6833       36.7500           93       171     2012      04        03        094              0.248333       6.747620       0.000000       0.252855   -9999.000000   -9999.000000       0.061100       0.256000
53872     53872     shanxi         112.6833       36.7500           93       171     2012      04        04        095              0.251375       9.159790       0.116568       0.257593   -9999.000000   -9999.000000       0.040800       0.218000
53872     53872     shanxi         112.6833       36.7500           93       171     2012      04        05        096              0.252958      11.832703       0.111470       0.248844       0.111000   -9999.000000       0.047800   -9999.000000
53872     53872     shanxi         112.6833       36.7500           93       171     2012      04        06        097              0.250167      12.659058       0.000000       0.242633       0.113000   -9999.000000       0.040700       0.279000
53872     53872     shanxi         112.6833       36.7500           93       171     2012      04        07        098              0.248870      12.852386       0.000000       0.236017       0.109000       0.087700       0.046600   -9999.000000
53872     53872     shanxi         112.6833       36.7500           93       171     2012      04        08        099              0.250292      13.901398       0.000000       0.229688       0.108000   -9999.000000   -9999.000000       0.287000
53872     53872     shanxi         112.6833       36.7500           93       171     2012      04        09        100              0.246042      15.327301       0.000000       0.224047       0.134000       0.158800       0.050400   -9999.000000
53872     53872     shanxi         112.6833       36.7500           93       171     2012      04        10        101              0.247375      15.122528       0.947680       0.223853       0.136000   -9999.000000       0.058200       0.423000
53872     53872     shanxi         112.6833       36.7500           93       171     2012      04        11        102              0.254542      14.794586       4.657532       0.233606       0.103000       0.074200       0.044500       0.480000
53872     53872     shanxi         112.6833       36.7500           93       171     2012      04        12        103              0.258333      13.940430       0.077005       0.254385       0.144000       0.112100       0.060000   -9999.000000
53872     53872     shanxi         112.6833       36.7500           93       171     2012      04        13        104              0.246958      11.388794       0.000000       0.264241       0.109000   -9999.000000       0.052200       0.245000
53872     53872     shanxi         112.6833       36.7500           93       171     2012      04        14        105              0.236167      14.547821       0.000000       0.248222       0.113000   -9999.000000   -9999.000000   -9999.000000
53872     53872     shanxi         112.6833       36.7500           93       171     2012      04        15        106              0.232417      14.087555       0.000000       0.239557       0.108000   -9999.000000       0.039200       0.255000
53872     53872     shanxi         112.6833       36.7500           93       171     2012      04        16        107              0.227250      15.855164       0.000000       0.230464       0.108000   -9999.000000       0.056500       0.305000
53872     53872     shanxi         112.6833       36.7500           93       171     2012      04        17        108              0.224125      16.011475       0.000000       0.223233       0.108000   -9999.000000       0.042900       0.366000
53872     53872     shanxi         112.6833       36.7500           93       171     2012      04        18        109              0.222458      16.274567       0.582278       0.219381       0.111000   -9999.000000   -9999.000000       0.292000
53872     53872     shanxi         112.6833       36.7500           93       171     2012      04        19        110              0.221292      16.599640       2.132451       0.219478       0.115000   -9999.000000   -9999.000000   -9999.000000
53872     53872     shanxi         112.6833       36.7500           93       171     2012      04        20        111              0.216708      17.548004       0.332046       0.218033       0.122000       0.041500       0.058100       0.237000
53872     53872     shanxi         112.6833       36.7500           93       171     2012      04        21        112              0.217375      15.710175       0.000000       0.217432       0.107500   -9999.000000       0.046400       0.315000
53872     53872     shanxi         112.6833       36.7500           93       171     2012      04        22        113              0.216391      17.478210       2.514063       0.214088       0.103000   -9999.000000       0.056200       0.392000
53872     53872     shanxi         112.6833       36.7500           93       171     2012      04        23        114              0.222833      19.023468       1.770215       0.231847       0.105000   -9999.000000       0.049300       0.211000
53872     53872     shanxi         112.6833       36.7500           93       171     2012      04        24        115              0.249542      21.763641       1.073193       0.232437   -9999.000000   -9999.000000       0.081400   -9999.000000
53872     53872     shanxi         112.6833       36.7500           93       171     2012      04        25        116              0.000000      12.560822       0.000000       0.254175   -9999.000000       0.241700   -9999.000000       0.707000
53872     53872     shanxi         112.6833       36.7500           93       171     2012      04        26        117              0.232208      12.405182       0.000000       0.236141       0.112500   -9999.000000       0.057500       0.277000
53872     53872     shanxi         112.6833       36.7500           93       171     2012      04        27        118              0.231167      17.154114       0.000000       0.222342       0.109500       0.226800   -9999.000000       0.411000
53872     53872     shanxi         112.6833       36.7500           93       171     2012      04        28        119              0.228667      18.555328       2.552181       0.209532       0.105000   -9999.000000       0.052400       0.334000
53872     53872     shanxi         112.6833       36.7500           93       171     2012      04        29        120              0.227583      19.572479       0.000000       0.217414   -9999.000000   -9999.000000       0.057300   -9999.000000
53872     53872     shanxi         112.6833       36.7500           93       171     2012      04        30        121              0.224583      20.741882       0.000000       0.211093       0.109000   -9999.000000       0.053200       0.312000
53872     53872     shanxi         112.6833       36.7500           93       171     2012      05        01        122              0.222708      21.381531       0.347657       0.203236       0.138000   -9999.000000   -9999.000000       0.364000
53872     53872     shanxi         112.6833       36.7500           93       171     2012      05        02        123              0.219958      20.817566       0.000000       0.198006       0.143000   -9999.000000       0.048300       0.268000
53872     53872     shanxi         112.6833       36.7500           93       171     2012      05        03        124              0.217958      21.990479       0.000000       0.193678       0.130000   -9999.000000       0.063300       0.259000
53872     53872     shanxi         112.6833       36.7500           93       171     2012      05        04        125              0.215292      22.435272       0.000000       0.187616       0.129000   -9999.000000       0.045900   -9999.000000
53872     53872     shanxi         112.6833       36.7500           93       171     2012      05        05        126              0.212458      23.209778       0.000000       0.182852       0.131000   -9999.000000       0.053300       0.290000
53872     53872     shanxi         112.6833       36.7500           93       171     2012      05        06        127              0.211083      24.115631       0.000000       0.180848       0.123000   -9999.000000   -9999.000000   -9999.000000
53872     53872     shanxi         112.6833       36.7500           93       171     2012      05        07        128              0.208542      24.809509       0.000000       0.179912   -9999.000000   -9999.000000       0.056100       0.322000
53872     53872     shanxi         112.6833       36.7500           93       171     2012      05        08        129              0.205750      23.672058       0.984677       0.180052       0.094000       0.054200       0.063700   -9999.000000
53872     53872     shanxi         112.6833       36.7500           93       171     2012      05        09        130              0.203750      23.901947       0.000000       0.191396       0.122000   -9999.000000       0.068600       0.351000
53872     53872     shanxi         112.6833       36.7500           93       171     2012      05        10        131              0.206818      22.296478       0.300276       0.192095       0.128000   -9999.000000       0.056400       0.266000
53872     53872     shanxi         112.6833       36.7500           93       171     2012      05        11        132              0.203625      24.608459       4.468089       0.187075       0.196000   -9999.000000       0.067000   -9999.000000
53872     53872     shanxi         112.6833       36.7500           93       171     2012      05        12        133              0.201708      20.298950       0.493225       0.227330       0.156000   -9999.000000   -9999.000000       0.162000
53872     53872     shanxi         112.6833       36.7500           93       171     2012      05        13        134              0.202083      15.447174       0.000000       0.232122       0.144000       0.121100       0.056800   -9999.000000
53872     53872     shanxi         112.6833       36.7500           93       171     2012      05        14        135              0.199625      17.460022       0.000000       0.215378       0.139000   -9999.000000       0.073300       0.211000
53872     53872     shanxi         112.6833       36.7500           93       171     2012      05        15        136              0.198167      17.322418       0.000000       0.200569       0.158000       0.212600       0.065300       0.254000
53872     53872     shanxi         112.6833       36.7500           93       171     2012      05        16        137              0.197042      18.784973       0.000000       0.190267       0.159000   -9999.000000       0.064800       0.310000
53872     53872     shanxi         112.6833       36.7500           93       171     2012      05        17        138              0.198083      19.594086       0.000000       0.183542       0.147000   -9999.000000       0.067900       0.269000
53872     53872     shanxi         112.6833       36.7500           93       171     2012      05        18        139              0.198042      22.548920       0.000000       0.179005       0.158500       0.297300   -9999.000000   -9999.000000
53872     53872     shanxi         112.6833       36.7500           93       171     2012      05        19        140              0.195542      24.376831       0.147091       0.177091       0.145000   -9999.000000       0.065200       0.212000
53872     53872     shanxi         112.6833       36.7500           93       171     2012      05        20        141              0.194458      24.090790       0.000000       0.178597   -9999.000000   -9999.000000       0.068100       0.295000
53872     53872     shanxi         112.6833       36.7500           93       171     2012      05        21        142              0.186167      24.695679       0.288068       0.177451       0.226000   -9999.000000       0.048000       0.256000
53872     53872     shanxi         112.6833       36.7500           93       171     2012      05        22        143              0.189208      17.942322       0.256996       0.185187       0.175000   -9999.000000       0.050300       0.198000
53872     53872     shanxi         112.6833       36.7500           93       171     2012      05        23        144              0.192000      19.915314       3.558695       0.186228   -9999.000000   -9999.000000   -9999.000000   -9999.000000
53872     53872     shanxi         112.6833       36.7500           93       171     2012      05        24        145              0.196250      20.650604       0.076182       0.208003       0.191000   -9999.000000       0.049800       0.493000
53872     53872     shanxi         112.6833       36.7500           93       171     2012      05        25        146              0.000000      19.520935       0.073279       0.216743       0.171000   -9999.000000       0.048100       0.309000
53872     53872     shanxi         112.6833       36.7500           93       171     2012      05        26        147              0.197208      20.993103       0.000000       0.198413       0.185000       0.042700       0.051300       0.325000
53872     53872     shanxi         112.6833       36.7500           93       171     2012      05        27        148              0.196708      21.989136       0.000000       0.186525       0.193000   -9999.000000       0.046000       0.243000
53872     53872     shanxi         112.6833       36.7500           93       171     2012      05        28        149              0.194750      23.457123       2.303142       0.179460       0.161000       0.073100       0.048300   -9999.000000
53872     53872     shanxi         112.6833       36.7500           93       171     2012      05        29        150              0.193125      23.948486       2.974469       0.182490       0.232000   -9999.000000   -9999.000000       0.208000
53872     53872     shanxi         112.6833       36.7500           93       171     2012      05        30        151              0.194458      20.613098       0.000000       0.232234       0.164000   -9999.000000       0.048400   -9999.000000
53872     53872     shanxi         112.6833       36.7500           93       171     2012      05        31        152              0.189917      22.651733       0.299135       0.204167       0.196000       0.111000   -9999.000000   -9999.000000
53872     53872     shanxi         112.6833       36.7500           93       171     2012      06        01        153              0.188500      21.447876       0.771280       0.193934       0.245000   -9999.000000       0.052000       0.321000
53872     53872     shanxi         112.6833       36.7500           93       171     2012      06        02        154              0.191875      21.129547       0.545044       0.197305       0.227000   -9999.000000       0.051900   -9999.000000
53872     53872     shanxi         112.6833       36.7500           93       171     2012      06        03        155              0.212750      21.257385       2.266493       0.196531       0.224000   -9999.000000       0.051500       0.452000
53872     53872     shanxi         112.6833       36.7500           93       171     2012      06        04        156              0.218500      21.562714       0.425554       0.214385       0.180000   -9999.000000       0.086800   -9999.000000
53872     53872     shanxi         112.6833       36.7500           93       171     2012      06        05        157              0.210417      24.177216       0.364918       0.201542   -9999.000000       0.245800       0.068300       0.320000
53872     53872     shanxi         112.6833       36.7500           93       171     2012      06        06        158              0.196333      24.613556       0.184857       0.188102       0.207000   -9999.000000       0.077200   -9999.000000
53872     53872     shanxi         112.6833       36.7500           93       171     2012      06        07        159              0.203042      19.143890       1.429912       0.189159       0.246000   -9999.000000       0.068400       0.185000
53872     53872     shanxi         112.6833       36.7500           93       171     2012      06        08        160              0.205167      22.833496       0.955343       0.196735       0.200000   -9999.000000       0.070700       0.307000
53872     53872     shanxi         112.6833       36.7500           93       171     2012      06        09        161              0.207083      23.370605       0.416246       0.195569       0.175000   -9999.000000   -9999.000000   -9999.000000
53872     53872     shanxi         112.6833       36.7500           93       171     2012      06        10        162              0.201792      26.052979       0.188343       0.181007       0.161000       0.124200       0.067700       0.267000
53872     53872     shanxi         112.6833       36.7500           93       171     2012      06        11        163              0.000000      23.634369       0.000000       0.176967       0.198000   -9999.000000       0.087000   -9999.000000
53872     53872     shanxi         112.6833       36.7500           93       171     2012      06        12        164              0.192625      24.273834       0.000000       0.170219       0.188000   -9999.000000       0.093800       0.181000
53872     53872     shanxi         112.6833       36.7500           93       171     2012      06        13        165              0.190083      26.123077       0.073527       0.168126       0.199000   -9999.000000       0.077200       0.366000
53872     53872     shanxi         112.6833       36.7500           93       171     2012      06        14        166              0.184625      26.732544       0.000000       0.167760       0.181000   -9999.000000       0.078800       0.400000
53872     53872     shanxi         112.6833       36.7500           93       171     2012      06        15        167              0.181304      24.649628       0.000000       0.167097       0.198000       0.027500   -9999.000000       0.295000
53872     53872     shanxi         112.6833       36.7500           93       171     2012      06        16        168              0.177125      25.127411       0.000000       0.166519       0.178000   -9999.000000       0.079800   -9999.000000
53872     53872     shanxi         112.6833       36.7500           93       171     2012      06        17        169              0.173667      26.760315       0.000000       0.165710       0.204000   -9999.000000       0.092800       0.215000
53872     53872     shanxi         112.6833       36.7500           93       171     2012      06        18        170              0.169708      28.029541       0.959989       0.164859       0.190000       0.132200       0.078100       0.370000
53872     53872     shanxi         112.6833       36.7500           93       171     2012      06        19        171              0.166000      28.389740       2.380270       0.169631       0.200000   -9999.000000       0.075700       0.411000
53872     53872     shanxi         112.6833       36.7500           93       171     2012      06        20        172              0.163125      27.912354       0.991387       0.185359       0.194000       0.067800   -9999.000000       0.293000
53872     53872     shanxi         112.6833       36.7500           93       171     2012      06        21        173              0.157167      26.013550       6.226396       0.181212       0.237000   -9999.000000       0.096300   -9999.000000
53872     53872     shanxi         112.6833       36.7500           93       171     2012      06        22        174              0.161250      23.564545       0.490450       0.235129       0.264000   -9999.000000       0.088300       0.474000
53872     53872     shanxi         112.6833       36.7500           93       171     2012      06        23        175              0.158000      26.306671       1.329810       0.213655       0.242000       0.205800       0.093500       0.458000
53872     53872     shanxi         112.6833       36.7500           93       171     2012      06        24        176              0.178167      22.976593      10.410769       0.203315       0.297000   -9999.000000       0.097600       0.939000
53872     53872     shanxi         112.6833       36.7500           93       171     2012      06        25        177              0.188583      22.837280       0.461804       0.271872       0.272000       0.134700       0.103900       0.594000
53872     53872     shanxi         112.6833       36.7500           93       171     2012      06        26        178              0.182958      23.441986       0.788980       0.252723       0.266000       0.217400   -9999.000000   -9999.000000
53872     53872     shanxi         112.6833       36.7500           93       171     2012      06        27        179              0.177708      23.775635       0.213346       0.240018       0.251000   -9999.000000       0.100600       0.594000
53872     53872     shanxi         112.6833       36.7500           93       171     2012      06        28        180              0.192458      21.255005      23.026962       0.232564       0.268000       0.177700       0.110400       0.581000
53872     53872     shanxi         112.6833       36.7500           93       171     2012      06        29        181              0.253458      21.501312       7.089831       0.277439       0.309000   -9999.000000       0.120100       0.988000
53872     53872     shanxi         112.6833       36.7500           93       171     2012      06        30        182              0.236917      21.140747       0.000000       0.328629       0.256000   -9999.000000       0.102100   -9999.000000
53872     53872     shanxi         112.6833       36.7500           93       171     2012      07        01        183              0.227625      24.259918       0.000000       0.292211       0.213000       0.197300       0.091000   -9999.000000
53872     53872     shanxi         112.6833       36.7500           93       171     2012      07        02        184              0.218333      25.669434       0.000000       0.272433       0.250000   -9999.000000   -9999.000000       0.480000
53872     53872     shanxi         112.6833       36.7500           93       171     2012      07        03        185              0.209042      26.311646       0.000000       0.257533       0.178000       0.111800       0.094600   -9999.000000
53872     53872     shanxi         112.6833       36.7500           93       171     2012      07        04        186              0.199458      25.876373       2.241944       0.245780       0.238000   -9999.000000       0.124600       0.522000
53872     53872     shanxi         112.6833       36.7500           93       171     2012      07        05        187              0.199833      23.726227       0.000000       0.255960       0.209000   -9999.000000       0.103600   -9999.000000
53872     53872     shanxi         112.6833       36.7500           93       171     2012      07        06        188              0.193042      26.179718       0.000000       0.243603   -9999.000000       0.113500       0.105800       0.332000
53872     53872     shanxi         112.6833       36.7500           93       171     2012      07        07        189              0.183250      26.163208       0.066898       0.227373   -9999.000000   -9999.000000   -9999.000000       0.411000
53872     53872     shanxi         112.6833       36.7500           93       171     2012      07        08        190              0.236042      23.762878      43.686394       0.224044   -9999.000000       0.122900       0.136600   -9999.000000
53872     53872     shanxi         112.6833       36.7500           93       171     2012      07        09        191              0.293167      23.833221      42.704372       0.317540       0.320500   -9999.000000       0.134100       1.000000
53872     53872     shanxi         112.6833       36.7500           93       171     2012      07        10        192              0.267333      22.464935       2.641748       0.384996       0.288500   -9999.000000       0.129300   -9999.000000
53872     53872     shanxi         112.6833       36.7500           93       171     2012      07        11        193              0.254708      24.907257       0.000000       0.350211       0.281000       0.312100       0.120900       0.983000
53872     53872     shanxi         112.6833       36.7500           93       171     2012      07        12        194              0.243833      25.343842       0.000000       0.332774       0.257000   -9999.000000       0.113500       0.632000
53872     53872     shanxi         112.6833       36.7500           93       171     2012      07        13        195              0.234958      25.986664       5.221483       0.319946       0.291000   -9999.000000   -9999.000000       0.677000
53872     53872     shanxi         112.6833       36.7500           93       171     2012      07        14        196              0.232917      22.614807       0.886337       0.329557       0.259000   -9999.000000       0.114600       0.649000
53872     53872     shanxi         112.6833       36.7500           93       171     2012      07        15        197              0.230083      21.824066       0.925631       0.323939       0.279000   -9999.000000       0.128500   -9999.000000
53872     53872     shanxi         112.6833       36.7500           93       171     2012      07        16        198              0.228667      21.326202       0.000000       0.321963       0.263000       0.208500       0.090600       0.776000
53872     53872     shanxi         112.6833       36.7500           93       171     2012      07        17        199              0.222542      23.289520       0.000000       0.312621       0.249000   -9999.000000       0.091400       0.543000
53872     53872     shanxi         112.6833       36.7500           93       171     2012      07        18        200              0.218750      23.086487       0.000000       0.305707       0.253000   -9999.000000       0.094000       0.604000
53872     53872     shanxi         112.6833       36.7500           93       171     2012      07        19        201              0.216625      23.619110       0.000000       0.300447       0.247000       0.043100   -9999.000000       0.457000
53872     53872     shanxi         112.6833       36.7500           93       171     2012      07        20        202              0.215435      24.524017       0.838110       0.295286       0.204000   -9999.000000       0.093900   -9999.000000
53872     53872     shanxi         112.6833       36.7500           93       171     2012      07        21        203              0.212042      25.815765       2.027757       0.293273       0.297000       0.110000       0.103900       0.717000
53872     53872     shanxi         112.6833       36.7500           93       171     2012      07        22        204              0.210292      23.892303       0.000000       0.303642       0.280000   -9999.000000       0.080600       0.542000
53872     53872     shanxi         112.6833       36.7500           93       171     2012      07        23        205              0.207208      23.541687       0.681570       0.291337   -9999.000000   -9999.000000       0.086800       0.520000
53872     53872     shanxi         112.6833       36.7500           93       171     2012      07        24        206              0.214833      23.934631       4.819059       0.287916       0.303000       0.019100   -9999.000000       0.516000
53872     53872     shanxi         112.6833       36.7500           93       171     2012      07        25        207              0.233250      24.639893       8.888473       0.300094       0.269000   -9999.000000       0.095900   -9999.000000
53872     53872     shanxi         112.6833       36.7500           93       171     2012      07        26        208              0.272792      25.221863      25.885920       0.320482       0.308000       0.128000       0.097000       0.892000
53872     53872     shanxi         112.6833       36.7500           93       171     2012      07        27        209              0.270708      24.830719       0.392139       0.359473       0.284000   -9999.000000       0.096200       0.800000
53872     53872     shanxi         112.6833       36.7500           93       171     2012      07        28        210              0.262583      26.160004       1.866492       0.335132       0.178000   -9999.000000       0.083600       0.738000
53872     53872     shanxi         112.6833       36.7500           93       171     2012      07        29        211              0.255292      26.368896       0.451848       0.328255       0.261000       0.302700       0.087600       0.575000
53872     53872     shanxi         112.6833       36.7500           93       171     2012      07        30        212              0.272708      27.369324      54.943424       0.315907       0.266000   -9999.000000   -9999.000000   -9999.000000
53872     53872     shanxi         112.6833       36.7500           93       171     2012      07        31        213              0.300292      25.671570      34.755592       0.365033       0.353000       0.200000       0.089400       0.940000
53872     53872     shanxi         112.6833       36.7500           93       171     2012      08        01        214              0.278542      22.433746       0.229965       0.385924       0.371000   -9999.000000       0.103300   -9999.000000
53872     53872     shanxi         112.6833       36.7500           93       171     2012      08        02        215              0.272043      23.474060       0.801999       0.354861       0.307000   -9999.000000       0.091700       0.799000
53872     53872     shanxi         112.6833       36.7500           93       171     2012      08        03        216              0.264083      25.104797       0.000000       0.344913       0.334000       0.124900       0.099800   -9999.000000
53872     53872     shanxi         112.6833       36.7500           93       171     2012      08        04        217              0.259458      24.581696       1.586382       0.337868       0.301000   -9999.000000       0.088400       0.904000
53872     53872     shanxi         112.6833       36.7500           93       171     2012      08        05        218              0.266375      25.696960       9.278039       0.332809       0.283000       0.300000       0.099700       0.815000
53872     53872     shanxi         112.6833       36.7500           93       171     2012      08        06        219              0.259917      24.294128       0.000000       0.350443       0.303000       0.054200       0.117400   -9999.000000
53872     53872     shanxi         112.6833       36.7500           93       171     2012      08        07        220              0.254250      25.030609       0.000000       0.337831       0.270000   -9999.000000   -9999.000000       0.682000
53872     53872     shanxi         112.6833       36.7500           93       171     2012      08        08        221              0.249417      25.334534       7.422637       0.328688       0.346000       0.219500       0.114600   -9999.000000
53872     53872     shanxi         112.6833       36.7500           93       171     2012      08        09        222              0.277875      25.936127       5.075761       0.331825       0.307000   -9999.000000       0.124600       0.872000
53872     53872     shanxi         112.6833       36.7500           93       171     2012      08        10        223              0.263292      22.006256       0.000000       0.346084       0.253500   -9999.000000   -9999.000000       0.740000
53872     53872     shanxi         112.6833       36.7500           93       171     2012      08        11        224              0.259000      23.698029       2.530212       0.328872       0.313000       0.108300       0.117500       0.793000
53872     53872     shanxi         112.6833       36.7500           93       171     2012      08        12        225              0.262625      25.038025       0.874396       0.326552       0.326000       0.459000       0.115400       0.625000
53872     53872     shanxi         112.6833       36.7500           93       171     2012      08        13        226              0.256958      21.851990       5.838963       0.330922       0.329000       0.045500       0.123200   -9999.000000
53872     53872     shanxi         112.6833       36.7500           93       171     2012      08        14        227              0.290292      21.208466      12.696835       0.331419       0.318000   -9999.000000       0.123500       0.955000
53872     53872     shanxi         112.6833       36.7500           93       171     2012      08        15        228              0.273167      20.211884       0.259215       0.357298       0.330000       0.233100       0.125200       0.764000
53872     53872     shanxi         112.6833       36.7500           93       171     2012      08        16        229              0.266292      23.155670       0.000000       0.335966       0.291000       0.227000   -9999.000000       0.806000
53872     53872     shanxi         112.6833       36.7500           93       171     2012      08        17        230              0.276583      23.554718      20.614695       0.327945   -9999.000000       0.323300       0.111700       0.780000
53872     53872     shanxi         112.6833       36.7500           93       171     2012      08        18        231              0.290833      21.635925       7.406149       0.352593   -9999.000000       0.288700       0.127900   -9999.000000
53872     53872     shanxi         112.6833       36.7500           93       171     2012      08        19        232              0.275792      21.147827       0.591117       0.361785       0.336000   -9999.000000       0.115300       0.937000
53872     53872     shanxi         112.6833       36.7500           93       171     2012      08        20        233              0.271333      22.833160       0.424188       0.343100       0.307000       0.335600       0.124200       0.815000
53872     53872     shanxi         112.6833       36.7500           93       171     2012      08        21        234              0.261500      23.429169       0.000000       0.335530       0.285000   -9999.000000   -9999.000000       0.818000
53872     53872     shanxi         112.6833       36.7500           93       171     2012      08        22        235              0.252417      20.206024       0.750387       0.327083       0.309500   -9999.000000       0.132200   -9999.000000
53872     53872     shanxi         112.6833       36.7500           93       171     2012      08        23        236              0.247542      19.257111       0.000000       0.322686       0.301000   -9999.000000       0.117000   -9999.000000
53872     53872     shanxi         112.6833       36.7500           93       171     2012      08        24        237              0.244167      17.969330       0.562354       0.320668       0.250000   -9999.000000       0.137300       0.617000
53872     53872     shanxi         112.6833       36.7500           93       171     2012      08        25        238              0.000000      19.858032       0.000000       0.316953       0.325000   -9999.000000       0.114600       0.589000
53872     53872     shanxi         112.6833       36.7500           93       171     2012      08        26        239              0.243417      20.298737       0.000000       0.315070       0.311500   -9999.000000       0.121900       0.484000
53872     53872     shanxi         112.6833       36.7500           93       171     2012      08        27        240              0.242417      21.978821       0.000000       0.311371       0.291000   -9999.000000   -9999.000000       0.502000
53872     53872     shanxi         112.6833       36.7500           93       171     2012      08        28        241              0.239583      21.569153       0.000000       0.310210       0.277000   -9999.000000       0.131000   -9999.000000
53872     53872     shanxi         112.6833       36.7500           93       171     2012      08        29        242              0.236000      22.428223       0.000000       0.305488       0.284000   -9999.000000       0.136400       0.535000
53872     53872     shanxi         112.6833       36.7500           93       171     2012      08        30        243              0.233292      22.755005       0.000000       0.300238       0.284000       0.285200       0.137900   -9999.000000
53872     53872     shanxi         112.6833       36.7500           93       171     2012      08        31        244              0.233208      22.602234       2.525131       0.297408       0.340000       0.038900       0.123200       0.562000
53872     53872     shanxi         112.6833       36.7500           93       171     2012      09        01        245              0.284458      20.856262      35.915253       0.306133       0.311000   -9999.000000       0.152300   -9999.000000
53872     53872     shanxi         112.6833       36.7500           93       171     2012      09        02        246              0.272792      19.114258       2.414119       0.373120       0.285500       0.158000   -9999.000000       0.831000
53872     53872     shanxi         112.6833       36.7500           93       171     2012      09        03        247              0.261875      18.445801       0.000000       0.343654       0.288000       0.299500       0.133900       0.632000
53872     53872     shanxi         112.6833       36.7500           93       171     2012      09        04        248              0.257750      18.721466       1.254098       0.330995   -9999.000000       0.164600       0.165200   -9999.000000
53872     53872     shanxi         112.6833       36.7500           93       171     2012      09        05        249              0.264500      19.350189      14.651661       0.326424   -9999.000000       0.118400       0.135300       0.699000
53872     53872     shanxi         112.6833       36.7500           93       171     2012      09        06        250              0.269250      19.100159       9.665961       0.341737       0.319000   -9999.000000       0.150200   -9999.000000
53872     53872     shanxi         112.6833       36.7500           93       171     2012      09        07        251              0.263458      16.851868       0.000000       0.361152       0.301000   -9999.000000   -9999.000000       0.905000
53872     53872     shanxi         112.6833       36.7500           93       171     2012      09        08        252              0.258500      19.581268       0.000000       0.341245       0.300000       0.119800       0.169100       0.701000
53872     53872     shanxi         112.6833       36.7500           93       171     2012      09        09        253              0.251167      19.661285       0.257425       0.332883       0.280000   -9999.000000       0.144500       0.793000
53872     53872     shanxi         112.6833       36.7500           93       171     2012      09        10        254              0.262708      19.226562       7.058923       0.326325       0.331000   -9999.000000       0.143900       0.863000
53872     53872     shanxi         112.6833       36.7500           93       171     2012      09        11        255              0.269833      17.508972       0.170644       0.340167       0.239000   -9999.000000       0.132900   -9999.000000
53872     53872     shanxi         112.6833       36.7500           93       171     2012      09        12        256              0.255708      19.130859       0.000000       0.333757       0.238000   -9999.000000       0.128200       0.751000
53872     53872     shanxi         112.6833       36.7500           93       171     2012      09        13        257              0.246333      14.937592       0.170805       0.326044       0.235000       0.129600   -9999.000000       0.555000
53872     53872     shanxi         112.6833       36.7500           93       171     2012      09        14        258              0.242583      14.925507       0.000000       0.321951       0.219000   -9999.000000       0.119500       0.644000
53872     53872     shanxi         112.6833       36.7500           93       171     2012      09        15        259              0.240125      16.127930       0.114261       0.319181       0.248000       0.136800       0.126700       0.481000
53872     53872     shanxi         112.6833       36.7500           93       171     2012      09        16        260              0.237083      16.638550       0.000000       0.316693       0.234000       0.016100       0.107600   -9999.000000
53872     53872     shanxi         112.6833       36.7500           93       171     2012      09        17        261              0.234292      16.397095       0.000000       0.313980       0.217500   -9999.000000       0.149800       0.599000
53872     53872     shanxi         112.6833       36.7500           93       171     2012      09        18        262              0.233125      16.016205       1.358914       0.313339       0.241000       0.086700       0.148200       0.600000
53872     53872     shanxi         112.6833       36.7500           93       171     2012      09        19        263              0.265583      15.769501       5.458262       0.314385       0.244000   -9999.000000   -9999.000000       0.956000
53872     53872     shanxi         112.6833       36.7500           93       171     2012      09        20        264              0.261000      15.461609       0.162666       0.330250       0.233000       0.130200       0.138500       0.510000
53872     53872     shanxi         112.6833       36.7500           93       171     2012      09        21        265              0.263917      16.873535       2.727988       0.319963   -9999.000000       0.125100       0.171000   -9999.000000
53872     53872     shanxi         112.6833       36.7500           93       171     2012      09        22        266              0.259250      14.899994       0.000000       0.328204       0.286500       0.457900       0.143900       0.620000
53872     53872     shanxi         112.6833       36.7500           93       171     2012      09        23        267              0.255000      17.027100       0.000000       0.319162       0.259500       0.334100       0.153500       0.650000
53872     53872     shanxi         112.6833       36.7500           93       171     2012      09        24        268              0.251542      17.561646       0.255741       0.315374       0.261000   -9999.000000   -9999.000000       0.497000
53872     53872     shanxi         112.6833       36.7500           93       171     2012      09        25        269              0.252565      17.242981       3.932600       0.314217       0.288000   -9999.000000       0.159700       0.700000
53872     53872     shanxi         112.6833       36.7500           93       171     2012      09        26        270              0.257043      16.554718       0.217567       0.324289       0.278000       0.147700       0.155200   -9999.000000
53872     53872     shanxi         112.6833       36.7500           93       171     2012      09        27        271              0.250857      17.337585       0.224648       0.321095       0.265000   -9999.000000       0.164500       0.511000
53872     53872     shanxi         112.6833       36.7500           93       171     2012      09        28        272              0.231133      15.149597       0.108729       0.313252       0.266500   -9999.000000       0.145700   -9999.000000
53872     53872     shanxi         112.6833       36.7500           93       171     2012      09        29        273              0.227417      12.428192       0.736029       0.309633       0.280000   -9999.000000       0.153300       0.436000
53872     53872     shanxi         112.6833       36.7500           93       171     2012      09        30        274              0.223958      12.580170       2.953013       0.308381       0.261000       0.281000   -9999.000000   -9999.000000
53872     53872     shanxi         112.6833       36.7500           93       171     2012      10        01        275              0.221083      13.038849       3.181972       0.309534   -9999.000000       0.310000       0.116500       0.432000
53872     53872     shanxi         112.6833       36.7500           93       171     2012      10        02        276              0.220042      13.759338       1.559448       0.313146       0.214000   -9999.000000       0.136300       0.521000
53872     53872     shanxi         112.6833       36.7500           93       171     2012      10        03        277              0.219250      15.562164       0.296010       0.311240       0.192500       0.132900       0.115300   -9999.000000
53872     53872     shanxi         112.6833       36.7500           93       171     2012      10        04        278              0.237125      15.716248       6.329062       0.306619       0.228500       0.021800       0.130500       0.852000
53872     53872     shanxi         112.6833       36.7500           93       171     2012      10        05        279              0.244750      14.087677       0.151315       0.326041       0.220000       0.205600       0.136100   -9999.000000
53872     53872     shanxi         112.6833       36.7500           93       171     2012      10        06        280              0.234708      13.065704       0.000000       0.316440       0.219000       0.169600   -9999.000000       0.646000
53872     53872     shanxi         112.6833       36.7500           93       171     2012      10        07        281              0.229917      13.937012       0.000000       0.311030       0.225000   -9999.000000       0.115400       0.515000
53872     53872     shanxi         112.6833       36.7500           93       171     2012      10        08        282              0.229958      13.606049       0.262831       0.309804       0.238000       0.228300       0.109200       0.655000
53872     53872     shanxi         112.6833       36.7500           93       171     2012      10        09        283              0.224917      14.705688       0.000000       0.308970       0.208000       0.385200       0.097600       0.382000
53872     53872     shanxi         112.6833       36.7500           93       171     2012      10        10        284              0.217542      12.271210       0.000000       0.304475       0.204500   -9999.000000       0.105900   -9999.000000
53872     53872     shanxi         112.6833       36.7500           93       171     2012      10        11        285              0.217042      11.887085       0.000000       0.302702       0.170000       0.250000   -9999.000000       0.494000
53872     53872     shanxi         112.6833       36.7500           93       171     2012      10        12        286              0.217208      13.170105       0.000000       0.302597       0.159000   -9999.000000       0.094100       0.486000
53872     53872     shanxi         112.6833       36.7500           93       171     2012      10        13        287              0.219083      13.691772       0.000000       0.301278       0.168000       0.168400       0.100100       0.602000
53872     53872     shanxi         112.6833       36.7500           93       171     2012      10        14        288              0.210042      13.772644       0.453114       0.299351       0.165000       0.137200       0.115100       0.447000
53872     53872     shanxi         112.6833       36.7500           93       171     2012      10        15        289              0.208250      13.261780       1.048182       0.299610       0.193000   -9999.000000       0.103000   -9999.000000
53872     53872     shanxi         112.6833       36.7500           93       171     2012      10        16        290              0.202333      11.397156       0.000000       0.305571       0.182000       0.263800       0.104800       0.580000
53872     53872     shanxi         112.6833       36.7500           93       171     2012      10        17        291              0.193708       8.756592       0.000000       0.301948       0.181000   -9999.000000   -9999.000000       0.415000
53872     53872     shanxi         112.6833       36.7500           93       171     2012      10        18        292              0.197792       7.968445       0.000000       0.298845       0.178000   -9999.000000       0.094000       0.455000
53872     53872     shanxi         112.6833       36.7500           93       171     2012      10        19        293              0.200833      10.956512       0.000000       0.299035       0.165000       0.136700       0.111200       0.282000
53872     53872     shanxi         112.6833       36.7500           93       171     2012      10        20        294              0.201000      11.306122       0.000000       0.297791       0.168500   -9999.000000       0.100900   -9999.000000
53872     53872     shanxi         112.6833       36.7500           93       171     2012      10        21        295              0.195958      12.539398       5.117935       0.296546       0.222000       0.193500       0.110000       0.507000
53872     53872     shanxi         112.6833       36.7500           93       171     2012      10        22        296              0.193833       8.213531       0.000000       0.315263   -9999.000000       0.119700   -9999.000000       0.446000
53872     53872     shanxi         112.6833       36.7500           93       171     2012      10        23        297              0.188458       7.318817       0.000000       0.306130   -9999.000000       0.196500       0.099400       0.374000
53872     53872     shanxi         112.6833       36.7500           93       171     2012      10        24        298              0.193583       6.907257       0.000000       0.305203   -9999.000000       0.132700       0.087800       0.266000
53872     53872     shanxi         112.6833       36.7500           93       171     2012      10        25        299              0.000000       8.989838       0.000000       0.303117       0.177500   -9999.000000       0.091100   -9999.000000
53872     53872     shanxi         112.6833       36.7500           93       171     2012      10        26        300              0.197208       9.385559       0.000000       0.301313       0.195500       0.252600       0.090700       0.259000
53872     53872     shanxi         112.6833       36.7500           93       171     2012      10        27        301              0.199875       7.348175       0.000000       0.302058       0.192000       0.180200       0.095300   -9999.000000
53872     53872     shanxi         112.6833       36.7500           93       171     2012      10        28        302              0.000000       9.425873       0.048947       0.300030   -9999.000000   -9999.000000   -9999.000000       0.379000
53872     53872     shanxi         112.6833       36.7500           93       171     2012      10        29        303              0.197167      10.433380       0.000000       0.299094   -9999.000000       0.046300       0.068300   -9999.000000
53872     53872     shanxi         112.6833       36.7500           93       171     2012      10        30        304              0.190500       8.988007       0.000000       0.297346       0.187000   -9999.000000       0.065400       0.256000
53872     53872     shanxi         112.6833       36.7500           93       171     2012      10        31        305              0.190250       6.653961       0.000000       0.293242       0.197000   -9999.000000       0.071500       0.289000
53872     53872     shanxi         112.6833       36.7500           93       171     2012      11        01        306              0.193458       6.570679       0.000000       0.289927       0.172000       0.291000       0.072600   -9999.000000
53872     53872     shanxi         112.6833       36.7500           93       171     2012      11        02        307              0.197750       6.497162       0.783290       0.292832       0.177000   -9999.000000       0.075700       0.321000
53872     53872     shanxi         112.6833       36.7500           93       171     2012      11        03        308              0.192875       8.886383       0.000000       0.295777   -9999.000000   -9999.000000   -9999.000000   -9999.000000
53872     53872     shanxi         112.6833       36.7500           93       171     2012      11        04        309              0.184583       2.795349       0.000000       0.265940   -9999.000000   -9999.000000       0.065900       0.301000
53872     53872     shanxi         112.6833       36.7500           93       171     2012      11        05        310              0.185750       1.156677       0.000000       0.244974       0.196000       0.161300       0.066300       0.238000
53872     53872     shanxi         112.6833       36.7500           93       171     2012      11        06        311              0.197667       3.051910       0.000000       0.262188       0.203000       0.103400       0.066400       0.380000
53872     53872     shanxi         112.6833       36.7500           93       171     2012      11        07        312              0.196000       4.371582       0.000000       0.281215       0.189000   -9999.000000       0.072700       0.214000
53872     53872     shanxi         112.6833       36.7500           93       171     2012      11        08        313              0.195750       3.357422       0.000000       0.277582       0.185000   -9999.000000   -9999.000000   -9999.000000
53872     53872     shanxi         112.6833       36.7500           93       171     2012      11        09        314              0.195292       4.536163       0.233791       0.289622   -9999.000000   -9999.000000       0.080200       0.269000
53872     53872     shanxi         112.6833       36.7500           93       171     2012      11        10        315              0.194292       3.968506       0.346080       0.296260       0.204000   -9999.000000       0.063700       0.210000
53872     53872     shanxi         112.6833       36.7500           93       171     2012      11        11        316              0.181000       1.903320       0.000000       0.260324       0.221000   -9999.000000       0.064500       0.408000
53872     53872     shanxi         112.6833       36.7500           93       171     2012      11        12        317              0.182625       0.880676       0.000000       0.237067       0.188000   -9999.000000       0.071200       0.206000
53872     53872     shanxi         112.6833       36.7500           93       171     2012      11        13        318              0.000000       2.029053       0.000000       0.260142       0.191000   -9999.000000       0.067500   -9999.000000
53872     53872     shanxi         112.6833       36.7500           93       171     2012      11        14        319              0.192696       2.466705       0.000000       0.252245   -9999.000000       0.068300   -9999.000000       0.265000
53872     53872     shanxi         112.6833       36.7500           93       171     2012      11        15        320              0.188833       2.517517       0.191977       0.254345   -9999.000000   -9999.000000       0.057200       0.222000
53872     53872     shanxi         112.6833       36.7500           93       171     2012      11        16        321              0.185333       0.968506       0.000000       0.255691       0.178000       0.040800       0.070800       0.403000
53872     53872     shanxi         112.6833       36.7500           93       171     2012      11        17        322              0.000000       1.117371       0.000000       0.240074       0.203000   -9999.000000       0.062900       0.126000
53872     53872     shanxi         112.6833       36.7500           93       171     2012      11        18        323              0.188875       1.733917       0.000000       0.245895       0.182000   -9999.000000       0.067500   -9999.000000
53872     53872     shanxi         112.6833       36.7500           93       171     2012      11        19        324              0.190542       2.506500       0.000000       0.256130   -9999.000000       0.229300       0.061800       0.160000
53872     53872     shanxi         112.6833       36.7500           93       171     2012      11        20        325              0.196792       2.621124       0.000000       0.269350   -9999.000000   -9999.000000   -9999.000000       0.276000
53872     53872     shanxi         112.6833       36.7500           93       171     2012      11        21        326              0.197417       2.812531       0.000000       0.283907       0.164000       0.012700       0.049300       0.205000
53872     53872     shanxi         112.6833       36.7500           93       171     2012      11        22        327              0.191292       4.003204       0.000000       0.284925       0.166000   -9999.000000       0.066400       0.178000
53872     53872     shanxi         112.6833       36.7500           93       171     2012      11        23        328              0.178833       1.876556       0.000000       0.265276       0.160000       0.152400       0.057700   -9999.000000
53872     53872     shanxi         112.6833       36.7500           93       171     2012      11        24        329              0.170167      -0.309113       0.000000       0.224827   -9999.000000       0.032600       0.060400       0.097000
53872     53872     shanxi         112.6833       36.7500           93       171     2012      11        25        330              0.180583       0.606171       0.027452       0.225574   -9999.000000   -9999.000000   -9999.000000   -9999.000000
53872     53872     shanxi         112.6833       36.7500           93       171     2012      11        26        331              0.166083      -0.064301       0.000000       0.225137       0.157000   -9999.000000   -9999.000000       0.048000
53872     53872     shanxi         112.6833       36.7500           93       171     2012      11        27        332              0.166708      -0.914825       0.000000       0.212964       0.171000       0.140900       0.047300   -9999.000000
53872     53872     shanxi         112.6833       36.7500           93       171     2012      11        28        333              0.153250       0.330963       0.000000       0.225105       0.159000       0.318300       0.056000       0.023000
53872     53872     shanxi         112.6833       36.7500           93       171     2012      11        29        334              0.119625      -1.709412       0.000000       0.202900       0.167000       0.088400       0.045300       0.011000
53872     53872     shanxi         112.6833       36.7500           93       171     2012      11        30        335              0.115667      -2.359131       0.000000       0.193424   -9999.000000   -9999.000000       0.054500   -9999.000000
53872     53872     shanxi         112.6833       36.7500           93       171     2012      12        01        336              0.099708      -0.844421       0.000000       0.206192   -9999.000000   -9999.000000   -9999.000000       0.039000
53872     53872     shanxi         112.6833       36.7500           93       171     2012      12        02        337              0.100917      -3.236816       0.000000       0.165033       0.173000       0.085200       0.048200   -9999.000000
53872     53872     shanxi         112.6833       36.7500           93       171     2012      12        03        338              0.089083      -1.116119       0.000000       0.195536       0.169000   -9999.000000       0.055200       0.012000
53872     53872     shanxi         112.6833       36.7500           93       171     2012      12        04        339              0.097417      -3.333221       0.000000       0.182184       0.158000       0.074200       0.046200       0.107000
53872     53872     shanxi         112.6833       36.7500           93       171     2012      12        05        340              0.082667      -0.660431       0.000000       0.209290   -9999.000000   -9999.000000       0.051200       0.064000
53872     53872     shanxi         112.6833       36.7500           93       171     2012      12        06        341              0.087667      -4.174347       0.000000       0.173577   -9999.000000   -9999.000000       0.052400       0.060000
53872     53872     shanxi         112.6833       36.7500           93       171     2012      12        07        342              0.084458      -1.304565       0.000000       0.195712   -9999.000000       0.391400       0.059700   -9999.000000
53872     53872     shanxi         112.6833       36.7500           93       171     2012      12        08        343              0.074917      -2.505707       0.000000       0.186655   -9999.000000       0.117800       0.044300       0.002000
53872     53872     shanxi         112.6833       36.7500           93       171     2012      12        09        344              0.072583      -5.177307       0.000000       0.165452       0.154000   -9999.000000       0.054900       0.036000
53872     53872     shanxi         112.6833       36.7500           93       171     2012      12        10        345              0.070417      -4.185638       0.000000       0.172832       0.161000   -9999.000000       0.040600       0.078000
53872     53872     shanxi         112.6833       36.7500           93       171     2012      12        11        346              0.063500      -3.804535       0.000000       0.176885   -9999.000000       0.146700       0.047300       0.017000
53872     53872     shanxi         112.6833       36.7500           93       171     2012      12        12        347              0.065875      -5.579590       0.000000       0.158224   -9999.000000   -9999.000000   -9999.000000   -9999.000000
53872     53872     shanxi         112.6833       36.7500           93       171     2012      12        13        348              0.072167      -4.308746       0.000000       0.163014   -9999.000000   -9999.000000       0.043500       0.028000
53872     53872     shanxi         112.6833       36.7500           93       171     2012      12        14        349              0.076167      -2.862518       0.000000       0.166655   -9999.000000   -9999.000000       0.040500       0.025000
53872     53872     shanxi         112.6833       36.7500           93       171     2012      12        15        350              0.000000      -2.691681       0.000000       0.178476   -9999.000000   -9999.000000       0.055000       0.153000
53872     53872     shanxi         112.6833       36.7500           93       171     2012      12        16        351              0.080875      -2.370514       0.000000       0.171391   -9999.000000       0.165100   -9999.000000       0.046000
53872     53872     shanxi         112.6833       36.7500           93       171     2012      12        17        352              0.075958      -1.927795       0.000000       0.183521   -9999.000000       0.024800       0.045800   -9999.000000
53872     53872     shanxi         112.6833       36.7500           93       171     2012      12        18        353              0.070792      -3.089325       0.000000       0.186434       0.138000   -9999.000000   -9999.000000       0.045000
53872     53872     shanxi         112.6833       36.7500           93       171     2012      12        19        354              0.072042      -3.310638       0.000000       0.170879   -9999.000000   -9999.000000       0.046100       0.012000
53872     53872     shanxi         112.6833       36.7500           93       171     2012      12        20        355              0.000000      -3.850861       0.396772       0.160423   -9999.000000       0.089500       0.049300       0.063000
53872     53872     shanxi         112.6833       36.7500           93       171     2012      12        21        356              0.071667      -4.676056       0.000000       0.155266   -9999.000000       0.282200       0.043000       0.063000
53872     53872     shanxi         112.6833       36.7500           93       171     2012      12        22        357              0.064750      -5.031952       0.000000       0.162176   -9999.000000       0.027000       0.049100   -9999.000000
53872     53872     shanxi         112.6833       36.7500           93       171     2012      12        23        358              0.058667      -8.426636       0.000000       0.145155   -9999.000000   -9999.000000   -9999.000000       0.062000
53872     53872     shanxi         112.6833       36.7500           93       171     2012      12        24        359              0.058250     -11.512482       0.000000       0.140260   -9999.000000       0.180400       0.047400   -9999.000000
53872     53872     shanxi         112.6833       36.7500           93       171     2012      12        25        360              0.058417      -8.673157       0.000000       0.139672   -9999.000000       0.064200       0.038800       0.006000
53872     53872     shanxi         112.6833       36.7500           93       171     2012      12        26        361              0.000000      -7.618225       0.000000       0.141816   -9999.000000       0.176000       0.047300   -9999.000000
53872     53872     shanxi         112.6833       36.7500           93       171     2012      12        27        362              0.059182      -7.279480       0.000000       0.141103   -9999.000000   -9999.000000       0.035200   -9999.000000
53872     53872     shanxi         112.6833       36.7500           93       171     2012      12        28        363              0.060000      -6.543549       0.000000       0.143318   -9999.000000   -9999.000000       0.042500   -9999.000000
53872     53872     shanxi         112.6833       36.7500           93       171     2012      12        29        364              0.000000      -4.939484       0.000000       0.152849   -9999.000000   -9999.000000   -9999.000000   -9999.000000
53872     53872     shanxi         112.6833       36.7500           93       171     2012      12        30        365              0.000000      -9.334167       0.000000       0.143685   -9999.000000   -9999.000000       0.033300       0.018000
53872     53872     shanxi         112.6833       36.7500           93       171     2012      12        31        366              0.053267      -8.451477       0.000000       0.142194   -9999.000000   -9999.000000       0.044100   -9999.000000
