# Supplementary material for: Research on Fusing Multisatellite Soil Moisture Data Based on Bayesian Model Averaging
Source: Hindawi journal article supplement (doi:10.1155/2018/9310838), 2018-06-25
Supplement: f1 [file 9310838.f1.zip › 2012_sm00-10cm_daily_ZDB_ZHY_53873_366days_allin.txt]

53873     53873     shanxi         112.8722       36.1036           96       171     2012      01        01        001              0.000000   -9999.000000       0.000000   -9999.000000       0.091000   -9999.000000       0.031500   -9999.000000
53873     53873     shanxi         112.8722       36.1036           96       171     2012      01        02        002              0.020458      -3.183899       0.187155       0.159574   -9999.000000       0.054100       0.041600       0.109000
53873     53873     shanxi         112.8722       36.1036           96       171     2012      01        03        003              0.000000      -4.102539       0.000000       0.151180   -9999.000000       0.098000   -9999.000000       0.006000
53873     53873     shanxi         112.8722       36.1036           96       171     2012      01        04        004              0.015792      -7.194458       0.000000       0.135603   -9999.000000   -9999.000000       0.036400   -9999.000000
53873     53873     shanxi         112.8722       36.1036           96       171     2012      01        05        005              0.015833      -8.081940       0.000000       0.133568   -9999.000000   -9999.000000       0.039900       0.040000
53873     53873     shanxi         112.8722       36.1036           96       171     2012      01        06        006              0.015625      -6.334167       0.000000       0.143061       0.086000   -9999.000000       0.036600       0.030000
53873     53873     shanxi         112.8722       36.1036           96       171     2012      01        07        007              0.016375      -5.058105       0.000000       0.148120   -9999.000000       0.121100       0.042600       0.021000
53873     53873     shanxi         112.8722       36.1036           96       171     2012      01        08        008              0.000000      -4.721649       0.000000       0.144357       0.094000       0.045000       0.038700       0.023000
53873     53873     shanxi         112.8722       36.1036           96       171     2012      01        09        009              0.018083      -3.974243       0.000000       0.158289       0.092000   -9999.000000   -9999.000000   -9999.000000
53873     53873     shanxi         112.8722       36.1036           96       171     2012      01        10        010              0.017958      -3.145935       0.000000       0.165802   -9999.000000   -9999.000000       0.019900       0.038000
53873     53873     shanxi         112.8722       36.1036           96       171     2012      01        11        011              0.016087      -3.505768       0.000000       0.165158   -9999.000000   -9999.000000       0.030000   -9999.000000
53873     53873     shanxi         112.8722       36.1036           96       171     2012      01        12        012              0.016375      -4.929810       0.000000       0.149236       0.106000       0.139600       0.028300       0.007000
53873     53873     shanxi         112.8722       36.1036           96       171     2012      01        13        013              0.017542      -3.898621       0.000000       0.159808       0.096000   -9999.000000       0.032200   -9999.000000
53873     53873     shanxi         112.8722       36.1036           96       171     2012      01        14        014              0.017875      -2.786865       0.000000       0.167203   -9999.000000   -9999.000000   -9999.000000   -9999.000000
53873     53873     shanxi         112.8722       36.1036           96       171     2012      01        15        015              0.020542      -2.981781       0.000000       0.161535   -9999.000000       0.034400       0.031600       0.030000
53873     53873     shanxi         112.8722       36.1036           96       171     2012      01        16        016              0.019042      -2.718109       0.000000       0.164165   -9999.000000       0.036300       0.020400   -9999.000000
53873     53873     shanxi         112.8722       36.1036           96       171     2012      01        17        017              0.000000      -3.872070       0.000000       0.148262       0.089000   -9999.000000       0.029100       0.060000
53873     53873     shanxi         112.8722       36.1036           96       171     2012      01        18        018              0.020250      -2.384155       0.000000       0.168043       0.102000       0.047800       0.028900   -9999.000000
53873     53873     shanxi         112.8722       36.1036           96       171     2012      01        19        019              0.023458      -1.935272       0.373575       0.173092       0.097000   -9999.000000       0.032600   -9999.000000
53873     53873     shanxi         112.8722       36.1036           96       171     2012      01        20        020              0.020708      -1.569092       0.000000       0.172009   -9999.000000   -9999.000000   -9999.000000       0.038000
53873     53873     shanxi         112.8722       36.1036           96       171     2012      01        21        021              0.017250      -4.970551       0.000000       0.143641   -9999.000000   -9999.000000       0.023900       0.034000
53873     53873     shanxi         112.8722       36.1036           96       171     2012      01        22        022              0.015625      -6.624847       0.985152       0.135498   -9999.000000       0.043200       0.023900       0.109000
53873     53873     shanxi         112.8722       36.1036           96       171     2012      01        23        023              0.013913      -8.229095       0.678114       0.132315   -9999.000000   -9999.000000       0.024300   -9999.000000
53873     53873     shanxi         112.8722       36.1036           96       171     2012      01        24        024              0.012917      -8.933533       0.000000       0.130646   -9999.000000   -9999.000000   -9999.000000       0.024000
53873     53873     shanxi         112.8722       36.1036           96       171     2012      01        25        025              0.013208      -9.656189       0.000000       0.126856   -9999.000000       0.048500       0.029300       0.048000
53873     53873     shanxi         112.8722       36.1036           96       171     2012      01        26        026              0.014917      -7.887787       0.000000       0.131835   -9999.000000   -9999.000000   -9999.000000       0.158000
53873     53873     shanxi         112.8722       36.1036           96       171     2012      01        27        027              0.015500      -4.402740       0.000000       0.156309       0.101000   -9999.000000       0.019000       0.021000
53873     53873     shanxi         112.8722       36.1036           96       171     2012      01        28        028              0.016625      -3.686707       0.000000       0.161207       0.110000       0.044500       0.031400   -9999.000000
53873     53873     shanxi         112.8722       36.1036           96       171     2012      01        29        029              0.016500      -2.749207       0.000000       0.171482       0.107000   -9999.000000       0.029300       0.051000
53873     53873     shanxi         112.8722       36.1036           96       171     2012      01        30        030              0.018667      -3.212860       0.000000       0.159023       0.104000   -9999.000000       0.037100       0.047000
53873     53873     shanxi         112.8722       36.1036           96       171     2012      01        31        031              0.021042      -2.390015       0.000000       0.172153   -9999.000000       0.032000   -9999.000000       0.185000
53873     53873     shanxi         112.8722       36.1036           96       171     2012      02        01        032              0.017542      -0.394287       0.000000       0.190288   -9999.000000   -9999.000000       0.031800       0.022000
53873     53873     shanxi         112.8722       36.1036           96       171     2012      02        02        033              0.015875      -4.484009       0.000000       0.155954       0.097000   -9999.000000       0.031300   -9999.000000
53873     53873     shanxi         112.8722       36.1036           96       171     2012      02        03        034              0.018125      -4.734924       0.000000       0.152783       0.103000   -9999.000000       0.036700       0.076000
53873     53873     shanxi         112.8722       36.1036           96       171     2012      02        04        035              0.017826      -2.248230       0.000000       0.171465   -9999.000000   -9999.000000       0.034900       0.044000
53873     53873     shanxi         112.8722       36.1036           96       171     2012      02        05        036              0.020292      -2.553070       0.000000       0.163406   -9999.000000       0.034600       0.040100       0.070000
53873     53873     shanxi         112.8722       36.1036           96       171     2012      02        06        037              0.017542      -1.225403       0.000000       0.183898   -9999.000000   -9999.000000   -9999.000000       0.011000
53873     53873     shanxi         112.8722       36.1036           96       171     2012      02        07        038              0.015208      -4.418121       0.205797       0.165720       0.086000       0.089000       0.031400   -9999.000000
53873     53873     shanxi         112.8722       36.1036           96       171     2012      02        08        039              0.012417      -6.427155       0.000000       0.142545   -9999.000000       0.102000       0.039900       0.044000
53873     53873     shanxi         112.8722       36.1036           96       171     2012      02        09        040              0.013750      -8.297180       0.000000       0.129276   -9999.000000       0.027000       0.036300   -9999.000000
53873     53873     shanxi         112.8722       36.1036           96       171     2012      02        10        041              0.016208      -5.559937       0.000000       0.139373   -9999.000000       0.039300       0.041100       0.012000
53873     53873     shanxi         112.8722       36.1036           96       171     2012      02        11        042              0.019500      -4.379364       0.000000       0.161700   -9999.000000   -9999.000000       0.042600   -9999.000000
53873     53873     shanxi         112.8722       36.1036           96       171     2012      02        12        043              0.018750      -0.849976       0.000000       0.180408   -9999.000000   -9999.000000   -9999.000000   -9999.000000
53873     53873     shanxi         112.8722       36.1036           96       171     2012      02        13        044              0.017667      -3.148132       0.000000       0.161508       0.090000       0.121000   -9999.000000       0.098000
53873     53873     shanxi         112.8722       36.1036           96       171     2012      02        14        045              0.021708      -2.212097       0.000000       0.169315       0.085000   -9999.000000       0.039000   -9999.000000
53873     53873     shanxi         112.8722       36.1036           96       171     2012      02        15        046              0.022042       0.123749       0.000000       0.193015       0.089000   -9999.000000       0.035800       0.105000
53873     53873     shanxi         112.8722       36.1036           96       171     2012      02        16        047              0.020917      -0.986572       0.000000       0.187296   -9999.000000   -9999.000000       0.037200   -9999.000000
53873     53873     shanxi         112.8722       36.1036           96       171     2012      02        17        048              0.018083      -2.429749       0.000000       0.176934       0.082000       0.187900   -9999.000000       0.048000
53873     53873     shanxi         112.8722       36.1036           96       171     2012      02        18        049              0.017458      -3.822449       0.000000       0.166582       0.092000       0.035200       0.036300       0.085000
53873     53873     shanxi         112.8722       36.1036           96       171     2012      02        19        050              0.020333      -3.861938       0.000000       0.164985       0.088000   -9999.000000       0.032400       0.215000
53873     53873     shanxi         112.8722       36.1036           96       171     2012      02        20        051              0.027167      -0.899597       0.000000       0.181368       0.090000   -9999.000000       0.034000       0.233000
53873     53873     shanxi         112.8722       36.1036           96       171     2012      02        21        052              0.032125       1.310394       0.000000       0.200026   -9999.000000   -9999.000000   -9999.000000   -9999.000000
53873     53873     shanxi         112.8722       36.1036           96       171     2012      02        22        053              0.039833       1.335510       0.000000       0.201787   -9999.000000   -9999.000000       0.041300       0.260000
53873     53873     shanxi         112.8722       36.1036           96       171     2012      02        23        054              0.050542       3.203339       0.000000       0.216810       0.075000       0.003400   -9999.000000       0.286000
53873     53873     shanxi         112.8722       36.1036           96       171     2012      02        24        055              0.056167       1.361908       0.000000       0.202221       0.080000   -9999.000000       0.032600       0.245000
53873     53873     shanxi         112.8722       36.1036           96       171     2012      02        25        056              0.047875       1.047272       0.000000       0.203104   -9999.000000   -9999.000000       0.036100       0.109000
53873     53873     shanxi         112.8722       36.1036           96       171     2012      02        26        057              0.040417      -1.070465       0.000000       0.179002   -9999.000000   -9999.000000       0.034500   -9999.000000
53873     53873     shanxi         112.8722       36.1036           96       171     2012      02        27        058              0.037458      -1.021729       0.000000       0.184027   -9999.000000   -9999.000000   -9999.000000       0.192000
53873     53873     shanxi         112.8722       36.1036           96       171     2012      02        28        059              0.040292       0.521912       0.000000       0.195026       0.074000   -9999.000000   -9999.000000       0.230000
53873     53873     shanxi         112.8722       36.1036           96       171     2012      02        29        060              0.000000   -9999.000000       0.000000   -9999.000000       0.080000   -9999.000000   -9999.000000   -9999.000000
53873     53873     shanxi         112.8722       36.1036           96       171     2012      03        01        061              0.051250       1.463593       1.145852       0.201181   -9999.000000   -9999.000000       0.020600       0.399000
53873     53873     shanxi         112.8722       36.1036           96       171     2012      03        02        062              0.054708       0.588989       0.131212       0.201599   -9999.000000       0.078800       0.034200   -9999.000000
53873     53873     shanxi         112.8722       36.1036           96       171     2012      03        03        063              0.050125       0.404968       0.109050       0.200304   -9999.000000   -9999.000000       0.035200       0.181000
53873     53873     shanxi         112.8722       36.1036           96       171     2012      03        04        064              0.052208      -0.434875       0.000000       0.187352       0.098000       0.065800       0.046400       0.304000
53873     53873     shanxi         112.8722       36.1036           96       171     2012      03        05        065              0.055750       0.543182       0.000000       0.198304       0.104000   -9999.000000   -9999.000000       0.284000
53873     53873     shanxi         112.8722       36.1036           96       171     2012      03        06        066              0.048750       1.117981       0.000000       0.204633       0.101000   -9999.000000       0.032000       0.217000
53873     53873     shanxi         112.8722       36.1036           96       171     2012      03        07        067              0.000000       0.594055       0.000000       0.197083       0.103000       0.037200       0.031800   -9999.000000
53873     53873     shanxi         112.8722       36.1036           96       171     2012      03        08        068              0.060167       3.789948       0.000000       0.217067   -9999.000000   -9999.000000       0.035700       0.292000
53873     53873     shanxi         112.8722       36.1036           96       171     2012      03        09        069              0.057917       2.540253       0.000000       0.210947       0.104000   -9999.000000       0.038200   -9999.000000
53873     53873     shanxi         112.8722       36.1036           96       171     2012      03        10        070              0.059500       3.114105       0.000000       0.212295       0.101000   -9999.000000       0.042100       0.355000
53873     53873     shanxi         112.8722       36.1036           96       171     2012      03        11        071              0.054792       4.388214       0.000000       0.215485       0.093000   -9999.000000   -9999.000000   -9999.000000
53873     53873     shanxi         112.8722       36.1036           96       171     2012      03        12        072              0.117833       2.653625       0.000000       0.202026       0.092000   -9999.000000       0.032600   -9999.000000
53873     53873     shanxi         112.8722       36.1036           96       171     2012      03        13        073              0.165917       3.148987       0.131210       0.205597   -9999.000000   -9999.000000       0.042000       0.442000
53873     53873     shanxi         112.8722       36.1036           96       171     2012      03        14        074              0.168217       5.882111       0.000000       0.215464   -9999.000000   -9999.000000   -9999.000000   -9999.000000
53873     53873     shanxi         112.8722       36.1036           96       171     2012      03        15        075              0.172625       6.211517       1.958738       0.219618       0.108000   -9999.000000       0.047300       0.428000
53873     53873     shanxi         112.8722       36.1036           96       171     2012      03        16        076              0.175750       2.772369       0.000000       0.218881       0.094000   -9999.000000   -9999.000000   -9999.000000
53873     53873     shanxi         112.8722       36.1036           96       171     2012      03        17        077              0.167750       6.324768       0.000000       0.222076       0.087000   -9999.000000       0.041700       0.466000
53873     53873     shanxi         112.8722       36.1036           96       171     2012      03        18        078              0.188917       8.969177       0.000000       0.224526   -9999.000000   -9999.000000       0.034200       0.399000
53873     53873     shanxi         112.8722       36.1036           96       171     2012      03        19        079              0.193208       6.291901       0.094484       0.212191   -9999.000000   -9999.000000       0.048700       0.276000
53873     53873     shanxi         112.8722       36.1036           96       171     2012      03        20        080              0.215667       0.965546       0.121090       0.198653       0.091000   -9999.000000       0.056500       0.400000
53873     53873     shanxi         112.8722       36.1036           96       171     2012      03        21        081              0.209875       3.744171       0.908621       0.216257   -9999.000000   -9999.000000       0.064600   -9999.000000
53873     53873     shanxi         112.8722       36.1036           96       171     2012      03        22        082              0.258958       1.082672       0.833624       0.206265       0.126000   -9999.000000   -9999.000000       0.507000
53873     53873     shanxi         112.8722       36.1036           96       171     2012      03        23        083              0.243250       1.989624       0.100755       0.229035   -9999.000000   -9999.000000       0.045800       0.342000
53873     53873     shanxi         112.8722       36.1036           96       171     2012      03        24        084              0.226250       4.287628       0.097374       0.225872   -9999.000000       0.149000   -9999.000000       0.587000
53873     53873     shanxi         112.8722       36.1036           96       171     2012      03        25        085              0.000000       7.423462       0.000000       0.221796       0.097000       0.210900       0.052800       0.484000
53873     53873     shanxi         112.8722       36.1036           96       171     2012      03        26        086              0.222917       9.257446       0.000000       0.219970       0.099000   -9999.000000       0.054600   -9999.000000
53873     53873     shanxi         112.8722       36.1036           96       171     2012      03        27        087              0.215083      10.325409       0.000000       0.214047       0.088000   -9999.000000       0.055500       0.510000
53873     53873     shanxi         112.8722       36.1036           96       171     2012      03        28        088              0.210750      11.713745       0.100915       0.208763       0.096000   -9999.000000   -9999.000000       0.520000
53873     53873     shanxi         112.8722       36.1036           96       171     2012      03        29        089              0.208833      12.384247       0.000000       0.205981       0.095000   -9999.000000       0.045900       0.491000
53873     53873     shanxi         112.8722       36.1036           96       171     2012      03        30        090              0.192500      12.503265       2.904219       0.204293   -9999.000000       0.139800       0.050700       0.295000
53873     53873     shanxi         112.8722       36.1036           96       171     2012      03        31        091              0.189333       8.514221       0.000000       0.201198       0.082000   -9999.000000       0.046200   -9999.000000
53873     53873     shanxi         112.8722       36.1036           96       171     2012      04        01        092              0.188333      10.214050       0.000000       0.194648       0.092000   -9999.000000       0.054100       0.552000
53873     53873     shanxi         112.8722       36.1036           96       171     2012      04        02        093              0.179000      13.445953       0.091449       0.191740       0.098000       0.363500   -9999.000000       0.273000
53873     53873     shanxi         112.8722       36.1036           96       171     2012      04        03        094              0.180000       6.865051       0.000000       0.192298   -9999.000000   -9999.000000       0.055000       0.362000
53873     53873     shanxi         112.8722       36.1036           96       171     2012      04        04        095              0.178958      10.039062       0.131100       0.191074   -9999.000000   -9999.000000       0.035600       0.341000
53873     53873     shanxi         112.8722       36.1036           96       171     2012      04        05        096              0.175708      13.041962       0.000000       0.186917       0.087500   -9999.000000       0.053700   -9999.000000
53873     53873     shanxi         112.8722       36.1036           96       171     2012      04        06        097              0.174042      13.650513       0.000000       0.182150       0.094000   -9999.000000       0.045900       0.399000
53873     53873     shanxi         112.8722       36.1036           96       171     2012      04        07        098              0.172250      14.359955       0.000000       0.178854       0.083000   -9999.000000       0.048800   -9999.000000
53873     53873     shanxi         112.8722       36.1036           96       171     2012      04        08        099              0.173583      15.481934       0.000000       0.175822   -9999.000000   -9999.000000   -9999.000000       0.400000
53873     53873     shanxi         112.8722       36.1036           96       171     2012      04        09        100              0.182833      17.341766       3.519248       0.173002       0.134000   -9999.000000       0.065500   -9999.000000
53873     53873     shanxi         112.8722       36.1036           96       171     2012      04        10        101              0.195667      13.539490       0.470655       0.208939       0.105500   -9999.000000       0.061500       0.838000
53873     53873     shanxi         112.8722       36.1036           96       171     2012      04        11        102              0.198458      13.900482      11.403564       0.220988       0.093000       0.219900       0.084300       0.452000
53873     53873     shanxi         112.8722       36.1036           96       171     2012      04        12        103              0.212375      14.673126       0.000000       0.211093       0.103000   -9999.000000       0.065000   -9999.000000
53873     53873     shanxi         112.8722       36.1036           96       171     2012      04        13        104              0.197167      10.703857       0.000000       0.205649       0.093000   -9999.000000       0.053700       0.379000
53873     53873     shanxi         112.8722       36.1036           96       171     2012      04        14        105              0.185375      15.316681       0.158242       0.194274       0.111000   -9999.000000   -9999.000000   -9999.000000
53873     53873     shanxi         112.8722       36.1036           96       171     2012      04        15        106              0.183042      14.366760       0.000000       0.187891       0.095000   -9999.000000       0.037400       0.304000
53873     53873     shanxi         112.8722       36.1036           96       171     2012      04        16        107              0.177667      17.206390       0.000000       0.180859       0.097500   -9999.000000       0.058200       0.401000
53873     53873     shanxi         112.8722       36.1036           96       171     2012      04        17        108              0.175042      16.307129       0.000000       0.177404       0.091000       0.145800       0.047200       0.381000
53873     53873     shanxi         112.8722       36.1036           96       171     2012      04        18        109              0.173917      16.512939       0.109320       0.176330       0.086000   -9999.000000   -9999.000000       0.296000
53873     53873     shanxi         112.8722       36.1036           96       171     2012      04        19        110              0.174042      17.220978       2.482852       0.174998       0.108000   -9999.000000   -9999.000000   -9999.000000
53873     53873     shanxi         112.8722       36.1036           96       171     2012      04        20        111              0.173333      19.531403       5.609966       0.185079   -9999.000000       0.262200       0.068200       0.229000
53873     53873     shanxi         112.8722       36.1036           96       171     2012      04        21        112              0.178375      14.640472       1.633252       0.235807       0.113000   -9999.000000       0.048200       0.500000
53873     53873     shanxi         112.8722       36.1036           96       171     2012      04        22        113              0.176292      16.415070       0.000000       0.252057       0.100000       0.093900       0.054700       0.541000
53873     53873     shanxi         112.8722       36.1036           96       171     2012      04        23        114              0.180583      19.442596       0.429590       0.230313       0.099000   -9999.000000       0.055600       0.391000
53873     53873     shanxi         112.8722       36.1036           96       171     2012      04        24        115              0.218667      20.928680       1.500195       0.217191   -9999.000000       0.092100       0.094800   -9999.000000
53873     53873     shanxi         112.8722       36.1036           96       171     2012      04        25        116              0.000000      12.061646       0.000000       0.232334   -9999.000000   -9999.000000   -9999.000000       0.719000
53873     53873     shanxi         112.8722       36.1036           96       171     2012      04        26        117              0.185042      12.737640       0.263477       0.215097       0.107500   -9999.000000       0.056000       0.417000
53873     53873     shanxi         112.8722       36.1036           96       171     2012      04        27        118              0.179292      17.880524       0.000000       0.199446       0.103500   -9999.000000   -9999.000000       0.413000
53873     53873     shanxi         112.8722       36.1036           96       171     2012      04        28        119              0.174875      19.256958       0.000000       0.185830       0.094000   -9999.000000       0.052900       0.276000
53873     53873     shanxi         112.8722       36.1036           96       171     2012      04        29        120              0.171167      20.383514       0.000000       0.178766   -9999.000000       0.154600       0.058600   -9999.000000
53873     53873     shanxi         112.8722       36.1036           96       171     2012      04        30        121              0.168917      20.525757       0.566602       0.175465       0.108000   -9999.000000   -9999.000000       0.306000
53873     53873     shanxi         112.8722       36.1036           96       171     2012      05        01        122              0.166417      19.975800       0.000000       0.175184       0.128000   -9999.000000   -9999.000000       0.328000
53873     53873     shanxi         112.8722       36.1036           96       171     2012      05        02        123              0.164583      20.226990       0.000000       0.173487       0.135500       0.044100       0.051400       0.338000
53873     53873     shanxi         112.8722       36.1036           96       171     2012      05        03        124              0.163667      21.463837       0.000000       0.170948       0.111000   -9999.000000       0.075800       0.286000
53873     53873     shanxi         112.8722       36.1036           96       171     2012      05        04        125              0.161917      21.612762       0.136319       0.167231       0.110000   -9999.000000       0.058500   -9999.000000
53873     53873     shanxi         112.8722       36.1036           96       171     2012      05        05        126              0.157792      23.644897       0.184467       0.163681       0.138000   -9999.000000       0.065300       0.357000
53873     53873     shanxi         112.8722       36.1036           96       171     2012      05        06        127              0.155292      24.751068       0.094250       0.161687       0.103000   -9999.000000   -9999.000000   -9999.000000
53873     53873     shanxi         112.8722       36.1036           96       171     2012      05        07        128              0.149583      25.617218       0.127965       0.160436   -9999.000000       0.245800       0.076200       0.379000
53873     53873     shanxi         112.8722       36.1036           96       171     2012      05        08        129              0.147917      24.102570       1.336645       0.160935   -9999.000000       0.092900       0.067100   -9999.000000
53873     53873     shanxi         112.8722       36.1036           96       171     2012      05        09        130              0.145875      23.315521       0.381055       0.175450       0.114000   -9999.000000       0.076500   -9999.000000
53873     53873     shanxi         112.8722       36.1036           96       171     2012      05        10        131              0.147000      22.487122       0.000000       0.174049       0.138000   -9999.000000       0.066100       0.397000
53873     53873     shanxi         112.8722       36.1036           96       171     2012      05        11        132              0.172250      24.871429       4.847268       0.165178       0.229000   -9999.000000       0.073900   -9999.000000
53873     53873     shanxi         112.8722       36.1036           96       171     2012      05        12        133              0.183583      21.295563       0.510690       0.201487       0.161000   -9999.000000   -9999.000000       0.301000
53873     53873     shanxi         112.8722       36.1036           96       171     2012      05        13        134              0.168667      16.077759       0.325647       0.213323       0.143500       0.263700       0.066600   -9999.000000
53873     53873     shanxi         112.8722       36.1036           96       171     2012      05        14        135              0.155792      18.515381       0.000000       0.195770       0.122000       0.317400       0.100200       0.226000
53873     53873     shanxi         112.8722       36.1036           96       171     2012      05        15        136              0.147042      18.276794       0.094045       0.178877       0.163000       0.184700       0.083400       0.243000
53873     53873     shanxi         112.8722       36.1036           96       171     2012      05        16        137              0.140500      19.544678       0.463468       0.168840       0.167000   -9999.000000       0.093100       0.379000
53873     53873     shanxi         112.8722       36.1036           96       171     2012      05        17        138              0.140917      20.422882       0.000000       0.166780       0.134500       0.268000       0.094600       0.306000
53873     53873     shanxi         112.8722       36.1036           96       171     2012      05        18        139              0.135792      23.444275       0.000000       0.161393       0.147000   -9999.000000   -9999.000000   -9999.000000
53873     53873     shanxi         112.8722       36.1036           96       171     2012      05        19        140              0.134917      24.040955       0.121650       0.158276   -9999.000000   -9999.000000       0.073400       0.328000
53873     53873     shanxi         112.8722       36.1036           96       171     2012      05        20        141              0.132750      24.319031       0.305562       0.157980   -9999.000000       0.118500       0.103600       0.367000
53873     53873     shanxi         112.8722       36.1036           96       171     2012      05        21        142              0.126500      24.151733       1.537683       0.160113       0.218000   -9999.000000       0.095300       0.298000
53873     53873     shanxi         112.8722       36.1036           96       171     2012      05        22        143              0.129565      18.125488       0.375553       0.175939       0.184000       0.138400       0.103300       0.299000
53873     53873     shanxi         112.8722       36.1036           96       171     2012      05        23        144              0.168833      18.552551      11.441635       0.184878   -9999.000000       0.037400   -9999.000000   -9999.000000
53873     53873     shanxi         112.8722       36.1036           96       171     2012      05        24        145              0.195083      19.298035       0.323355       0.241951       0.184000   -9999.000000       0.116800       0.905000
53873     53873     shanxi         112.8722       36.1036           96       171     2012      05        25        146              0.000000      18.319275       0.000000       0.248700       0.164000   -9999.000000       0.105500       0.421000
53873     53873     shanxi         112.8722       36.1036           96       171     2012      05        26        147              0.161500      20.391205       0.228925       0.222595       0.216000       0.183200       0.120100       0.429000
53873     53873     shanxi         112.8722       36.1036           96       171     2012      05        27        148              0.157083      20.514954       0.000000       0.207398       0.206000       0.163600       0.093000       0.393000
53873     53873     shanxi         112.8722       36.1036           96       171     2012      05        28        149              0.147958      23.180725       2.365068       0.190730       0.176500       0.041500       0.106400   -9999.000000
53873     53873     shanxi         112.8722       36.1036           96       171     2012      05        29        150              0.147042      22.758484       1.072688       0.187507       0.195000   -9999.000000   -9999.000000       0.420000
53873     53873     shanxi         112.8722       36.1036           96       171     2012      05        30        151              0.142250      19.277588       0.000000       0.218814       0.155000   -9999.000000       0.089000   -9999.000000
53873     53873     shanxi         112.8722       36.1036           96       171     2012      05        31        152              0.136208      22.091583       0.000000       0.193080       0.200000       0.157900   -9999.000000   -9999.000000
53873     53873     shanxi         112.8722       36.1036           96       171     2012      06        01        153              0.152625      21.256195      12.845863       0.181586       0.246000   -9999.000000       0.092500       0.616000
53873     53873     shanxi         112.8722       36.1036           96       171     2012      06        02        154              0.174000      21.941986       1.535120       0.237249       0.179500   -9999.000000       0.134700   -9999.000000
53873     53873     shanxi         112.8722       36.1036           96       171     2012      06        03        155              0.157708      20.185852       0.000000       0.262958       0.177000   -9999.000000   -9999.000000       0.387000
53873     53873     shanxi         112.8722       36.1036           96       171     2012      06        04        156              0.152375      21.013977       0.000000       0.236680       0.145000   -9999.000000   -9999.000000   -9999.000000
53873     53873     shanxi         112.8722       36.1036           96       171     2012      06        05        157              0.143625      23.645599       2.257843       0.213924   -9999.000000       0.069400       0.104300       0.425000
53873     53873     shanxi         112.8722       36.1036           96       171     2012      06        06        158              0.133000      23.186493       1.505134       0.216049       0.207000   -9999.000000       0.136500   -9999.000000
53873     53873     shanxi         112.8722       36.1036           96       171     2012      06        07        159              0.137458      17.956604       2.082430       0.240659       0.165000       0.206300       0.119000       0.613000
53873     53873     shanxi         112.8722       36.1036           96       171     2012      06        08        160              0.132583      22.867615       0.129409       0.214953       0.170000   -9999.000000       0.123300       0.421000
53873     53873     shanxi         112.8722       36.1036           96       171     2012      06        09        161              0.128333      23.198517       0.113471       0.196609       0.135000       0.221000   -9999.000000   -9999.000000
53873     53873     shanxi         112.8722       36.1036           96       171     2012      06        10        162              0.122625      25.544464       0.129446       0.180953   -9999.000000       0.044700       0.112400       0.412000
53873     53873     shanxi         112.8722       36.1036           96       171     2012      06        11        163              0.000000      24.568207       0.000000       0.172261       0.186000   -9999.000000       0.128200   -9999.000000
53873     53873     shanxi         112.8722       36.1036           96       171     2012      06        12        164              0.117208      24.355133       0.131266       0.165045       0.174000       0.242700       0.149300       0.254000
53873     53873     shanxi         112.8722       36.1036           96       171     2012      06        13        165              0.116500      25.678406       0.024140       0.160268       0.181500   -9999.000000       0.131200       0.495000
53873     53873     shanxi         112.8722       36.1036           96       171     2012      06        14        166              0.112458      27.610352       0.000000       0.157209       0.163000   -9999.000000       0.137700       0.515000
53873     53873     shanxi         112.8722       36.1036           96       171     2012      06        15        167              0.111458      25.539062       0.670449       0.155619       0.164000       0.031800   -9999.000000       0.350000
53873     53873     shanxi         112.8722       36.1036           96       171     2012      06        16        168              0.110167      25.589691       0.000000       0.154288       0.186000   -9999.000000       0.130100   -9999.000000
53873     53873     shanxi         112.8722       36.1036           96       171     2012      06        17        169              0.109000      26.750824       0.000000       0.153248       0.188000   -9999.000000       0.146800       0.267000
53873     53873     shanxi         112.8722       36.1036           96       171     2012      06        18        170              0.107792      27.535858       0.000000       0.152117       0.168500       0.175200       0.108000       0.535000
53873     53873     shanxi         112.8722       36.1036           96       171     2012      06        19        171              0.106708      28.806702       0.140000       0.150929       0.170000   -9999.000000       0.114200       0.531000
53873     53873     shanxi         112.8722       36.1036           96       171     2012      06        20        172              0.104458      28.854095       0.000000       0.150129   -9999.000000       0.024000   -9999.000000       0.381000
53873     53873     shanxi         112.8722       36.1036           96       171     2012      06        21        173              0.112042      27.353394       3.667176       0.149493       0.196000   -9999.000000       0.132000   -9999.000000
53873     53873     shanxi         112.8722       36.1036           96       171     2012      06        22        174              0.122292      25.191071       0.000000       0.186111       0.186000   -9999.000000       0.092200       0.433000
53873     53873     shanxi         112.8722       36.1036           96       171     2012      06        23        175              0.113917      26.825592       7.410554       0.180173       0.218000   -9999.000000       0.130900       0.718000
53873     53873     shanxi         112.8722       36.1036           96       171     2012      06        24        176              0.148833      23.607422      12.683196       0.238741       0.234000   -9999.000000       0.120700       1.000000
53873     53873     shanxi         112.8722       36.1036           96       171     2012      06        25        177              0.169208      22.115387       2.167833       0.289778       0.237000       0.313900       0.170500       0.930000
53873     53873     shanxi         112.8722       36.1036           96       171     2012      06        26        178              0.167792      21.672577       1.054283       0.272294   -9999.000000   -9999.000000   -9999.000000   -9999.000000
53873     53873     shanxi         112.8722       36.1036           96       171     2012      06        27        179              0.155250      22.247223       0.865860       0.260323       0.228000       0.266700       0.165600       0.770000
53873     53873     shanxi         112.8722       36.1036           96       171     2012      06        28        180              0.159458      20.811676      21.426067       0.255327       0.180000       0.282800       0.196800       0.740000
53873     53873     shanxi         112.8722       36.1036           96       171     2012      06        29        181              0.278625      21.231934      10.599783       0.285274       0.267000   -9999.000000       0.195200       1.000000
53873     53873     shanxi         112.8722       36.1036           96       171     2012      06        30        182              0.252458      20.326324       0.000000       0.327386       0.189000   -9999.000000       0.163400   -9999.000000
53873     53873     shanxi         112.8722       36.1036           96       171     2012      07        01        183              0.226833      23.948029       0.000000       0.288356       0.204000       0.120800       0.153900   -9999.000000
53873     53873     shanxi         112.8722       36.1036           96       171     2012      07        02        184              0.207583      25.329437       0.367899       0.269180       0.247000   -9999.000000   -9999.000000       0.625000
53873     53873     shanxi         112.8722       36.1036           96       171     2012      07        03        185              0.196667      25.716797       0.000000       0.255088       0.209000       0.125400       0.132800   -9999.000000
53873     53873     shanxi         112.8722       36.1036           96       171     2012      07        04        186              0.183875      26.367310       2.537142       0.242952       0.284000   -9999.000000       0.185400       0.715000
53873     53873     shanxi         112.8722       36.1036           96       171     2012      07        05        187              0.187417      22.373962       0.000000       0.260983       0.189000       0.173000       0.152900   -9999.000000
53873     53873     shanxi         112.8722       36.1036           96       171     2012      07        06        188              0.178208      25.052521       0.183426       0.242704   -9999.000000   -9999.000000       0.159000       0.518000
53873     53873     shanxi         112.8722       36.1036           96       171     2012      07        07        189              0.172542      25.086182       3.681904       0.229403   -9999.000000   -9999.000000   -9999.000000       0.748000
53873     53873     shanxi         112.8722       36.1036           96       171     2012      07        08        190              0.216208      22.400787      44.026108       0.260030   -9999.000000       0.289700       0.203200   -9999.000000
53873     53873     shanxi         112.8722       36.1036           96       171     2012      07        09        191              0.309917      23.897552      17.650080       0.303880       0.311500   -9999.000000       0.173600       1.000000
53873     53873     shanxi         112.8722       36.1036           96       171     2012      07        10        192              0.278708      22.343994       0.056601       0.351958       0.262000   -9999.000000       0.190800   -9999.000000
53873     53873     shanxi         112.8722       36.1036           96       171     2012      07        11        193              0.262458      25.133698       0.048818       0.316691       0.202000       0.154000       0.171300       0.927000
53873     53873     shanxi         112.8722       36.1036           96       171     2012      07        12        194              0.246292      25.740479       0.140742       0.301351   -9999.000000   -9999.000000       0.164100       0.723000
53873     53873     shanxi         112.8722       36.1036           96       171     2012      07        13        195              0.266625      25.947632       9.476388       0.289326       0.265000       0.134100   -9999.000000       0.785000
53873     53873     shanxi         112.8722       36.1036           96       171     2012      07        14        196              0.298542      22.432159       2.933938       0.313035       0.235000   -9999.000000       0.179300       0.923000
53873     53873     shanxi         112.8722       36.1036           96       171     2012      07        15        197              0.281375      21.230896       2.295520       0.311756       0.229500       0.273200       0.192700   -9999.000000
53873     53873     shanxi         112.8722       36.1036           96       171     2012      07        16        198              0.271292      22.041351       0.000000       0.304510       0.213000       0.168300       0.168700       0.927000
53873     53873     shanxi         112.8722       36.1036           96       171     2012      07        17        199              0.279583      22.430664       0.000000       0.295879       0.190000   -9999.000000       0.171400       0.768000
53873     53873     shanxi         112.8722       36.1036           96       171     2012      07        18        200              0.280917      23.620087       0.000000       0.285658       0.215000   -9999.000000       0.169200       0.765000
53873     53873     shanxi         112.8722       36.1036           96       171     2012      07        19        201              0.269875      23.533386       0.000000       0.279359       0.217000       0.218200   -9999.000000       0.722000
53873     53873     shanxi         112.8722       36.1036           96       171     2012      07        20        202              0.261261      24.400360       0.125031       0.272761       0.160000       0.292800       0.121700   -9999.000000
53873     53873     shanxi         112.8722       36.1036           96       171     2012      07        21        203              0.276958      25.751251       9.868358       0.266670       0.231000       0.116900       0.180100       1.000000
53873     53873     shanxi         112.8722       36.1036           96       171     2012      07        22        204              0.310250      24.258575       0.815996       0.293653       0.233000   -9999.000000       0.164600       0.725000
53873     53873     shanxi         112.8722       36.1036           96       171     2012      07        23        205              0.291458      23.316498       5.810241       0.288099       0.257000       0.308600       0.176300       0.723000
53873     53873     shanxi         112.8722       36.1036           96       171     2012      07        24        206              0.276458      23.365509       0.078617       0.296438       0.261000       0.238900   -9999.000000       0.717000
53873     53873     shanxi         112.8722       36.1036           96       171     2012      07        25        207              0.265792      25.241364       0.302015       0.280473       0.216500   -9999.000000       0.173300   -9999.000000
53873     53873     shanxi         112.8722       36.1036           96       171     2012      07        26        208              0.262042      26.349060       0.055721       0.271820       0.229500       0.257700       0.156200       0.751000
53873     53873     shanxi         112.8722       36.1036           96       171     2012      07        27        209              0.254417      27.380066       0.245027       0.261022       0.204000   -9999.000000       0.186300       0.665000
53873     53873     shanxi         112.8722       36.1036           96       171     2012      07        28        210              0.246125      27.470428       0.000000       0.250704   -9999.000000   -9999.000000       0.171300       0.685000
53873     53873     shanxi         112.8722       36.1036           96       171     2012      07        29        211              0.238917      28.011810       0.658530       0.239888       0.247000       0.229300       0.176300       0.744000
53873     53873     shanxi         112.8722       36.1036           96       171     2012      07        30        212              0.265292      27.473419      33.784351       0.236191       0.204000       0.250900   -9999.000000   -9999.000000
53873     53873     shanxi         112.8722       36.1036           96       171     2012      07        31        213              0.344125      26.547363       4.161494       0.290746       0.307500       0.056700       0.205600       0.867000
53873     53873     shanxi         112.8722       36.1036           96       171     2012      08        01        214              0.338250      23.168335      26.707626       0.327828       0.273000   -9999.000000       0.204200   -9999.000000
53873     53873     shanxi         112.8722       36.1036           96       171     2012      08        02        215              0.331875      23.799896      15.421400       0.325706       0.257000       0.159400       0.200000       0.864000
53873     53873     shanxi         112.8722       36.1036           96       171     2012      08        03        216              0.311708      23.686218       1.007111       0.349303       0.279000       0.299000       0.199900   -9999.000000
53873     53873     shanxi         112.8722       36.1036           96       171     2012      08        04        217              0.297958      23.354889       3.701579       0.329837       0.287000   -9999.000000   -9999.000000       1.000000
53873     53873     shanxi         112.8722       36.1036           96       171     2012      08        05        218              0.294833      23.686615       1.013316       0.319044       0.262500   -9999.000000   -9999.000000       0.897000
53873     53873     shanxi         112.8722       36.1036           96       171     2012      08        06        219              0.286417      22.802338       0.000000       0.318755       0.253500       0.366900       0.181700   -9999.000000
53873     53873     shanxi         112.8722       36.1036           96       171     2012      08        07        220              0.273583      23.964264       0.000000       0.307278       0.218000   -9999.000000   -9999.000000       0.800000
53873     53873     shanxi         112.8722       36.1036           96       171     2012      08        08        221              0.262583      24.850586       0.757654       0.298067   -9999.000000       0.049500       0.196000   -9999.000000
53873     53873     shanxi         112.8722       36.1036           96       171     2012      08        09        222              0.253667      26.245880       1.473399       0.291306       0.271000   -9999.000000       0.234900       0.703000
53873     53873     shanxi         112.8722       36.1036           96       171     2012      08        10        223              0.241917      22.017273       0.000000       0.294771       0.225000       0.277100   -9999.000000       0.716000
53873     53873     shanxi         112.8722       36.1036           96       171     2012      08        11        224              0.233125      23.477539       0.000000       0.284107       0.219500       0.146800       0.214300       0.734000
53873     53873     shanxi         112.8722       36.1036           96       171     2012      08        12        225              0.234000      25.121582       6.699147       0.278167       0.206000   -9999.000000       0.232300       1.000000
53873     53873     shanxi         112.8722       36.1036           96       171     2012      08        13        226              0.237333      22.468842      12.211548       0.299399   -9999.000000       0.185100       0.169900   -9999.000000
53873     53873     shanxi         112.8722       36.1036           96       171     2012      08        14        227              0.287875      19.991791      15.936333       0.307716       0.261000   -9999.000000       0.203400       1.000000
53873     53873     shanxi         112.8722       36.1036           96       171     2012      08        15        228              0.275583      19.944031       0.000000       0.340777       0.263000   -9999.000000       0.193500       0.865000
53873     53873     shanxi         112.8722       36.1036           96       171     2012      08        16        229              0.254292      23.213562       0.575868       0.311384       0.224500       0.203500   -9999.000000       0.868000
53873     53873     shanxi         112.8722       36.1036           96       171     2012      08        17        230              0.247625      23.050659      22.765682       0.301546       0.226000   -9999.000000       0.162200       0.751000
53873     53873     shanxi         112.8722       36.1036           96       171     2012      08        18        231              0.335042      23.003387      26.736433       0.316404   -9999.000000       0.178900       0.202800   -9999.000000
53873     53873     shanxi         112.8722       36.1036           96       171     2012      08        19        232              0.319833      20.909363       0.200478       0.358978       0.264000   -9999.000000       0.185300       0.916000
53873     53873     shanxi         112.8722       36.1036           96       171     2012      08        20        233              0.310500      21.679382       0.063418       0.328500       0.244000       0.182200       0.254700       0.834000
53873     53873     shanxi         112.8722       36.1036           96       171     2012      08        21        234              0.291292      22.605133       0.000000       0.318507       0.232000       0.230500   -9999.000000       0.931000
53873     53873     shanxi         112.8722       36.1036           96       171     2012      08        22        235              0.271125      21.154419       0.000000       0.308359       0.231000   -9999.000000       0.257000   -9999.000000
53873     53873     shanxi         112.8722       36.1036           96       171     2012      08        23        236              0.258375      19.489166       0.000000       0.301562       0.211000       0.117400       0.219500   -9999.000000
53873     53873     shanxi         112.8722       36.1036           96       171     2012      08        24        237              0.247417      18.235748       1.159645       0.296113       0.203000       0.303800       0.280000       0.738000
53873     53873     shanxi         112.8722       36.1036           96       171     2012      08        25        238              0.000000      19.788086       0.000000       0.294845       0.262000       0.095700       0.225600       0.677000
53873     53873     shanxi         112.8722       36.1036           96       171     2012      08        26        239              0.234917      19.767120       0.000000       0.290686       0.231000   -9999.000000       0.241200       0.658000
53873     53873     shanxi         112.8722       36.1036           96       171     2012      08        27        240              0.227625      21.386414      11.659374       0.286687       0.238500   -9999.000000   -9999.000000       0.584000
53873     53873     shanxi         112.8722       36.1036           96       171     2012      08        28        241              0.220958      21.662140       0.000000       0.283664       0.201000       0.274100       0.225600   -9999.000000
53873     53873     shanxi         112.8722       36.1036           96       171     2012      08        29        242              0.211625      22.494080       0.000000       0.279099       0.212000       0.261000       0.214100       0.622000
53873     53873     shanxi         112.8722       36.1036           96       171     2012      08        30        243              0.203500      23.350159       0.316576       0.272297       0.228000       0.259800       0.231500   -9999.000000
53873     53873     shanxi         112.8722       36.1036           96       171     2012      08        31        244              0.203667      22.979523       2.268802       0.267571       0.293000       0.052900       0.216600       0.655000
53873     53873     shanxi         112.8722       36.1036           96       171     2012      09        01        245              0.253167      20.692932       9.667194       0.278397       0.257000   -9999.000000       0.252200   -9999.000000
53873     53873     shanxi         112.8722       36.1036           96       171     2012      09        02        246              0.278208      19.272064       0.081111       0.312844       0.222000       0.222400   -9999.000000       0.839000
53873     53873     shanxi         112.8722       36.1036           96       171     2012      09        03        247              0.251042      18.684998       0.796460       0.296342       0.192000       0.201100       0.170500       0.658000
53873     53873     shanxi         112.8722       36.1036           96       171     2012      09        04        248              0.236875      18.879791       4.157719       0.284148   -9999.000000       0.141400       0.213600   -9999.000000
53873     53873     shanxi         112.8722       36.1036           96       171     2012      09        05        249              0.253667      19.289368       0.359877       0.285445       0.211000       0.156100       0.199700       0.710000
53873     53873     shanxi         112.8722       36.1036           96       171     2012      09        06        250              0.255708      19.937073       5.307117       0.293991       0.224000   -9999.000000       0.195000   -9999.000000
53873     53873     shanxi         112.8722       36.1036           96       171     2012      09        07        251              0.255833      17.988251       0.060745       0.302210       0.216000   -9999.000000   -9999.000000       0.801000
53873     53873     shanxi         112.8722       36.1036           96       171     2012      09        08        252              0.236167      20.292847       1.319743       0.292530       0.189000       0.179700       0.217300       0.707000
53873     53873     shanxi         112.8722       36.1036           96       171     2012      09        09        253              0.221125      19.639801       0.000000       0.284570       0.190000   -9999.000000       0.158500       0.782000
53873     53873     shanxi         112.8722       36.1036           96       171     2012      09        10        254              0.262750      19.886261      12.461631       0.276958       0.285000       0.085400       0.152400       0.966000
53873     53873     shanxi         112.8722       36.1036           96       171     2012      09        11        255              0.310917      17.435852       0.573748       0.308432       0.231000   -9999.000000       0.140000   -9999.000000
53873     53873     shanxi         112.8722       36.1036           96       171     2012      09        12        256              0.289417      18.771179       0.000000       0.306513       0.168000   -9999.000000       0.147400       0.787000
53873     53873     shanxi         112.8722       36.1036           96       171     2012      09        13        257              0.266750      14.551453       0.000000       0.293825       0.190000       0.163400   -9999.000000       0.616000
53873     53873     shanxi         112.8722       36.1036           96       171     2012      09        14        258              0.247708      14.919250       0.000000       0.285481       0.169000   -9999.000000       0.125600       0.790000
53873     53873     shanxi         112.8722       36.1036           96       171     2012      09        15        259              0.238792      16.118622       0.109068       0.281083       0.207000       0.315700       0.140400       0.577000
53873     53873     shanxi         112.8722       36.1036           96       171     2012      09        16        260              0.228917      16.178528       0.000000       0.277909       0.204000       0.117500       0.126900   -9999.000000
53873     53873     shanxi         112.8722       36.1036           96       171     2012      09        17        261              0.221000      16.558289       0.000000       0.273808       0.178500   -9999.000000       0.169200       0.676000
53873     53873     shanxi         112.8722       36.1036           96       171     2012      09        18        262              0.215000      16.505524       7.478227       0.271686       0.217000       0.131900       0.174000       0.694000
53873     53873     shanxi         112.8722       36.1036           96       171     2012      09        19        263              0.214167      16.098022       1.476648       0.301238   -9999.000000   -9999.000000   -9999.000000       0.782000
53873     53873     shanxi         112.8722       36.1036           96       171     2012      09        20        264              0.213958      16.073181       0.172821       0.293215       0.194000   -9999.000000       0.151700       0.556000
53873     53873     shanxi         112.8722       36.1036           96       171     2012      09        21        265              0.218125      16.972137       1.180550       0.284611   -9999.000000       0.206000       0.182400   -9999.000000
53873     53873     shanxi         112.8722       36.1036           96       171     2012      09        22        266              0.218333      15.059052       0.000000       0.289882       0.199000       0.360900       0.165200       0.587000
53873     53873     shanxi         112.8722       36.1036           96       171     2012      09        23        267              0.212500      17.454895       0.000000       0.281658       0.193500       0.066000       0.173000       0.710000
53873     53873     shanxi         112.8722       36.1036           96       171     2012      09        24        268              0.207292      17.418610       0.000000       0.277263       0.183000   -9999.000000   -9999.000000       0.584000
53873     53873     shanxi         112.8722       36.1036           96       171     2012      09        25        269              0.252375      17.192230       6.678951       0.274016       0.198000       0.250000       0.201800       0.908000
53873     53873     shanxi         112.8722       36.1036           96       171     2012      09        26        270              0.289083      16.461151       1.768879       0.296820       0.198000       0.145500       0.170100   -9999.000000
53873     53873     shanxi         112.8722       36.1036           96       171     2012      09        27        271              0.277000      15.731476       0.000000       0.301111       0.211000   -9999.000000       0.193900       0.616000
53873     53873     shanxi         112.8722       36.1036           96       171     2012      09        28        272              0.235333      14.900543       0.000000       0.286449       0.170000   -9999.000000       0.176800   -9999.000000
53873     53873     shanxi         112.8722       36.1036           96       171     2012      09        29        273              0.227375      12.876068       0.827063       0.278616       0.202500   -9999.000000       0.188100       0.592000
53873     53873     shanxi         112.8722       36.1036           96       171     2012      09        30        274              0.217667      13.494476       0.192953       0.274487       0.182000       0.255700   -9999.000000   -9999.000000
53873     53873     shanxi         112.8722       36.1036           96       171     2012      10        01        275              0.210125      13.795624       1.000412       0.271893   -9999.000000       0.165400       0.128200   -9999.000000
53873     53873     shanxi         112.8722       36.1036           96       171     2012      10        02        276              0.203583      14.669525       0.115940       0.267976       0.183000   -9999.000000       0.139400       0.629000
53873     53873     shanxi         112.8722       36.1036           96       171     2012      10        03        277              0.201125      16.238525       0.232787       0.265066       0.159000       0.160600       0.123400   -9999.000000
53873     53873     shanxi         112.8722       36.1036           96       171     2012      10        04        278              0.199783      16.755463       9.686729       0.261337       0.193000       0.163800       0.145500       0.852000
53873     53873     shanxi         112.8722       36.1036           96       171     2012      10        05        279              0.206000      16.105438       0.148515       0.289142       0.166000   -9999.000000       0.163200   -9999.000000
53873     53873     shanxi         112.8722       36.1036           96       171     2012      10        06        280              0.200042      14.401855       0.000000       0.289707       0.166000       0.213900   -9999.000000       0.761000
53873     53873     shanxi         112.8722       36.1036           96       171     2012      10        07        281              0.195125      15.074554       0.000000       0.279754       0.190000   -9999.000000       0.090800       0.690000
53873     53873     shanxi         112.8722       36.1036           96       171     2012      10        08        282              0.193167      14.408691       0.000000       0.276617       0.180000   -9999.000000       0.105100       0.778000
53873     53873     shanxi         112.8722       36.1036           96       171     2012      10        09        283              0.186875      15.214325       0.000000       0.273797       0.173000   -9999.000000       0.094100       0.543000
53873     53873     shanxi         112.8722       36.1036           96       171     2012      10        10        284              0.182375      13.004913       0.000000       0.266218       0.176000       0.176800       0.106400   -9999.000000
53873     53873     shanxi         112.8722       36.1036           96       171     2012      10        11        285              0.179958      12.998688       0.000000       0.262835       0.126000   -9999.000000   -9999.000000       0.601000
53873     53873     shanxi         112.8722       36.1036           96       171     2012      10        12        286              0.179458      14.245636       0.000000       0.261246       0.150000   -9999.000000       0.096400       0.657000
53873     53873     shanxi         112.8722       36.1036           96       171     2012      10        13        287              0.178083      14.740997       0.000000       0.260939       0.138000       0.174700       0.093000       0.764000
53873     53873     shanxi         112.8722       36.1036           96       171     2012      10        14        288              0.176208      14.831665       0.394796       0.257566       0.140500       0.196000       0.108000       0.510000
53873     53873     shanxi         112.8722       36.1036           96       171     2012      10        15        289              0.175667      14.293335       1.220200       0.257280       0.157000       0.083700       0.112200   -9999.000000
53873     53873     shanxi         112.8722       36.1036           96       171     2012      10        16        290              0.171375      12.512909       0.000000       0.265276       0.135000       0.111700       0.120700       0.659000
53873     53873     shanxi         112.8722       36.1036           96       171     2012      10        17        291              0.168500       9.157684       0.298235       0.262778       0.136000   -9999.000000   -9999.000000       0.475000
53873     53873     shanxi         112.8722       36.1036           96       171     2012      10        18        292              0.140708       8.653290       0.069787       0.257298       0.151000       0.218800       0.105100       0.625000
53873     53873     shanxi         112.8722       36.1036           96       171     2012      10        19        293              0.135500      12.390411       0.000000       0.256345       0.148500   -9999.000000       0.117200       0.413000
53873     53873     shanxi         112.8722       36.1036           96       171     2012      10        20        294              0.136375      12.230865       0.000000       0.255611       0.145500   -9999.000000       0.109800   -9999.000000
53873     53873     shanxi         112.8722       36.1036           96       171     2012      10        21        295              0.143292      13.518311       5.363884       0.252899       0.157000   -9999.000000       0.131600       0.624000
53873     53873     shanxi         112.8722       36.1036           96       171     2012      10        22        296              0.145208       8.585754       0.082130       0.280586   -9999.000000   -9999.000000   -9999.000000       0.521000
53873     53873     shanxi         112.8722       36.1036           96       171     2012      10        23        297              0.137833       7.627014       0.260680       0.272480   -9999.000000   -9999.000000       0.098900       0.496000
53873     53873     shanxi         112.8722       36.1036           96       171     2012      10        24        298              0.138500       7.614838       0.000000       0.268882   -9999.000000   -9999.000000       0.075100       0.425000
53873     53873     shanxi         112.8722       36.1036           96       171     2012      10        25        299              0.000000       9.597321       0.000000       0.265284       0.148500   -9999.000000       0.094800   -9999.000000
53873     53873     shanxi         112.8722       36.1036           96       171     2012      10        26        300              0.131375      10.542938       0.857723       0.262736       0.155500   -9999.000000       0.085200       0.386000
53873     53873     shanxi         112.8722       36.1036           96       171     2012      10        27        301              0.135000       8.882446       0.000000       0.263644       0.143000   -9999.000000       0.094800   -9999.000000
53873     53873     shanxi         112.8722       36.1036           96       171     2012      10        28        302              0.000000      10.741058       0.252995       0.260452   -9999.000000   -9999.000000   -9999.000000       0.539000
53873     53873     shanxi         112.8722       36.1036           96       171     2012      10        29        303              0.130708      11.414673       0.000000       0.258772   -9999.000000       0.223900       0.073000   -9999.000000
53873     53873     shanxi         112.8722       36.1036           96       171     2012      10        30        304              0.126042       9.899658       4.006177       0.258090       0.130000   -9999.000000       0.067400   -9999.000000
53873     53873     shanxi         112.8722       36.1036           96       171     2012      10        31        305              0.125458       6.842194       2.186393       0.250828       0.155000   -9999.000000       0.081300       0.390000
53873     53873     shanxi         112.8722       36.1036           96       171     2012      11        01        306              0.125167       6.835388       0.000000       0.248150       0.128000       0.226700       0.070300   -9999.000000
53873     53873     shanxi         112.8722       36.1036           96       171     2012      11        02        307              0.125792       7.326416       2.462590       0.250771       0.135000   -9999.000000       0.082000       0.477000
53873     53873     shanxi         112.8722       36.1036           96       171     2012      11        03        308              0.123125       9.467590       0.249996       0.255902   -9999.000000       0.309900   -9999.000000   -9999.000000
53873     53873     shanxi         112.8722       36.1036           96       171     2012      11        04        309              0.113625       2.444305       0.000000       0.234882   -9999.000000   -9999.000000       0.061700       0.297000
53873     53873     shanxi         112.8722       36.1036           96       171     2012      11        05        310              0.117542       0.304077       0.000000       0.206736       0.143000       0.159900       0.078900       0.392000
53873     53873     shanxi         112.8722       36.1036           96       171     2012      11        06        311              0.122583       2.760956       0.000000       0.229102       0.145000       0.020300       0.072400       0.482000
53873     53873     shanxi         112.8722       36.1036           96       171     2012      11        07        312              0.119458       5.087952       0.000000       0.250731       0.148000   -9999.000000       0.081100       0.346000
53873     53873     shanxi         112.8722       36.1036           96       171     2012      11        08        313              0.120000       4.383484       0.000000       0.251993   -9999.000000       0.083400   -9999.000000   -9999.000000
53873     53873     shanxi         112.8722       36.1036           96       171     2012      11        09        314              0.118583       5.568512       0.156589       0.254928       0.159000   -9999.000000       0.087000       0.262000
53873     53873     shanxi         112.8722       36.1036           96       171     2012      11        10        315              0.122609       4.005829       0.916901       0.258078       0.157000       0.273900       0.059700       0.335000
53873     53873     shanxi         112.8722       36.1036           96       171     2012      11        11        316              0.111583       1.655151       0.000000       0.233972       0.141000       0.126500       0.079100       0.436000
53873     53873     shanxi         112.8722       36.1036           96       171     2012      11        12        317              0.110625       0.857452       0.000000       0.212260       0.133000   -9999.000000       0.073100       0.269000
53873     53873     shanxi         112.8722       36.1036           96       171     2012      11        13        318              0.000000       1.854523       0.000000       0.220639       0.139000   -9999.000000       0.079500   -9999.000000
53873     53873     shanxi         112.8722       36.1036           96       171     2012      11        14        319              0.117208       2.523987       0.000000       0.220403   -9999.000000       0.103700   -9999.000000       0.237000
53873     53873     shanxi         112.8722       36.1036           96       171     2012      11        15        320              0.119708       2.764862       0.858798       0.223818   -9999.000000   -9999.000000       0.066600       0.313000
53873     53873     shanxi         112.8722       36.1036           96       171     2012      11        16        321              0.115375       1.602722       0.000000       0.235410       0.134000       0.169700       0.076900       0.474000
53873     53873     shanxi         112.8722       36.1036           96       171     2012      11        17        322              0.000000       1.244110       0.000000       0.219423       0.137000   -9999.000000       0.071500       0.290000
53873     53873     shanxi         112.8722       36.1036           96       171     2012      11        18        323              0.116417       2.886749       0.000000       0.229707       0.132000   -9999.000000       0.078700   -9999.000000
53873     53873     shanxi         112.8722       36.1036           96       171     2012      11        19        324              0.116167       3.657135       0.000000       0.232267   -9999.000000       0.187000       0.075800       0.274000
53873     53873     shanxi         112.8722       36.1036           96       171     2012      11        20        325              0.117958       3.220276       0.000000       0.240122       0.142000   -9999.000000   -9999.000000   -9999.000000
53873     53873     shanxi         112.8722       36.1036           96       171     2012      11        21        326              0.118292       2.977905       0.000000       0.250046       0.110000       0.072800       0.046000       0.347000
53873     53873     shanxi         112.8722       36.1036           96       171     2012      11        22        327              0.115000       3.867828       0.000000       0.250639       0.120000   -9999.000000       0.075600       0.215000
53873     53873     shanxi         112.8722       36.1036           96       171     2012      11        23        328              0.103958       2.670929       0.000000       0.229947       0.115000   -9999.000000       0.063400   -9999.000000
53873     53873     shanxi         112.8722       36.1036           96       171     2012      11        24        329              0.107167      -0.020935       0.000000       0.200082   -9999.000000       0.018400       0.072600       0.253000
53873     53873     shanxi         112.8722       36.1036           96       171     2012      11        25        330              0.106125       1.419159       0.185155       0.215620   -9999.000000   -9999.000000   -9999.000000   -9999.000000
53873     53873     shanxi         112.8722       36.1036           96       171     2012      11        26        331              0.092750       0.407990       0.000000       0.206644       0.107000   -9999.000000   -9999.000000       0.108000
53873     53873     shanxi         112.8722       36.1036           96       171     2012      11        27        332              0.099333      -0.884216       0.000000       0.187044       0.124000   -9999.000000       0.049000   -9999.000000
53873     53873     shanxi         112.8722       36.1036           96       171     2012      11        28        333              0.090667       0.784760       0.000000       0.203608       0.113000       0.136100       0.062900       0.070000
53873     53873     shanxi         112.8722       36.1036           96       171     2012      11        29        334              0.078708      -1.310730       0.000000       0.182334       0.117000       0.024400       0.059100       0.080000
53873     53873     shanxi         112.8722       36.1036           96       171     2012      11        30        335              0.078667      -1.485809       0.000000       0.179823   -9999.000000   -9999.000000       0.066000   -9999.000000
53873     53873     shanxi         112.8722       36.1036           96       171     2012      12        01        336              0.066375      -0.467987       0.439166       0.185506   -9999.000000   -9999.000000   -9999.000000       0.104000
53873     53873     shanxi         112.8722       36.1036           96       171     2012      12        02        337              0.072792      -2.588348       0.000000       0.157840       0.115000       0.156700       0.049300   -9999.000000
53873     53873     shanxi         112.8722       36.1036           96       171     2012      12        03        338              0.068042      -0.241272       0.000000       0.188974       0.109000   -9999.000000       0.065200       0.112000
53873     53873     shanxi         112.8722       36.1036           96       171     2012      12        04        339              0.082000      -2.639893       0.000000       0.169118       0.118000       0.102000       0.060500       0.259000
53873     53873     shanxi         112.8722       36.1036           96       171     2012      12        05        340              0.062667       0.108917       0.000000       0.192363   -9999.000000   -9999.000000       0.067600       0.151000
53873     53873     shanxi         112.8722       36.1036           96       171     2012      12        06        341              0.074375      -3.329498       0.000000       0.161366   -9999.000000   -9999.000000   -9999.000000       0.199000
53873     53873     shanxi         112.8722       36.1036           96       171     2012      12        07        342              0.065542      -0.372131       0.000000       0.183788       0.100000       0.211700   -9999.000000   -9999.000000
53873     53873     shanxi         112.8722       36.1036           96       171     2012      12        08        343              0.054375      -2.519928       0.000000       0.167589       0.109000       0.106900       0.049700       0.016000
53873     53873     shanxi         112.8722       36.1036           96       171     2012      12        09        344              0.054042      -4.436981       0.000000       0.153538       0.114000       0.083200       0.068400       0.047000
53873     53873     shanxi         112.8722       36.1036           96       171     2012      12        10        345              0.052542      -3.309235       0.000000       0.162973       0.112000   -9999.000000       0.053300       0.199000
53873     53873     shanxi         112.8722       36.1036           96       171     2012      12        11        346              0.043625      -3.133392       0.000000       0.167320   -9999.000000       0.181300       0.064800       0.023000
53873     53873     shanxi         112.8722       36.1036           96       171     2012      12        12        347              0.048042      -4.555389       0.000000       0.150240       0.099000   -9999.000000   -9999.000000   -9999.000000
53873     53873     shanxi         112.8722       36.1036           96       171     2012      12        13        348              0.051958      -2.829132       2.025927       0.156744   -9999.000000   -9999.000000       0.052300       0.017000
53873     53873     shanxi         112.8722       36.1036           96       171     2012      12        14        349              0.054375      -2.966431       0.000000       0.150979       0.112000   -9999.000000       0.051400       0.078000
53873     53873     shanxi         112.8722       36.1036           96       171     2012      12        15        350              0.000000      -2.547791       0.000000       0.163098   -9999.000000       0.176100       0.058200       0.088000
53873     53873     shanxi         112.8722       36.1036           96       171     2012      12        16        351              0.061792      -2.839020       0.127628       0.150108   -9999.000000       0.149600   -9999.000000       0.159000
53873     53873     shanxi         112.8722       36.1036           96       171     2012      12        17        352              0.060000      -1.626953       0.000000       0.166224   -9999.000000   -9999.000000       0.061900   -9999.000000
53873     53873     shanxi         112.8722       36.1036           96       171     2012      12        18        353              0.059167      -1.449554       0.000000       0.178031       0.096000   -9999.000000   -9999.000000       0.078000
53873     53873     shanxi         112.8722       36.1036           96       171     2012      12        19        354              0.054625      -2.575165       0.423467       0.164930   -9999.000000   -9999.000000       0.045500       0.099000
53873     53873     shanxi         112.8722       36.1036           96       171     2012      12        20        355              0.000000      -3.296112       1.243457       0.149403   -9999.000000       0.119500       0.050200       0.054000
53873     53873     shanxi         112.8722       36.1036           96       171     2012      12        21        356              0.054500      -4.209076       0.000000       0.142010   -9999.000000   -9999.000000       0.043900       0.083000
53873     53873     shanxi         112.8722       36.1036           96       171     2012      12        22        357              0.046083      -4.897430       0.000000       0.144525   -9999.000000       0.017900       0.051000   -9999.000000
53873     53873     shanxi         112.8722       36.1036           96       171     2012      12        23        358              0.039667      -8.179840       0.000000       0.132885   -9999.000000   -9999.000000   -9999.000000       0.007000
53873     53873     shanxi         112.8722       36.1036           96       171     2012      12        24        359              0.039444     -10.654572       0.000000       0.127560   -9999.000000       0.162600       0.057500   -9999.000000
53873     53873     shanxi         112.8722       36.1036           96       171     2012      12        25        360              0.041375      -7.326355       0.000000       0.130083   -9999.000000       0.169100       0.036300       0.076000
53873     53873     shanxi         112.8722       36.1036           96       171     2012      12        26        361              0.000000      -6.807648       0.000000       0.133148   -9999.000000       0.079700       0.056700   -9999.000000
53873     53873     shanxi         112.8722       36.1036           96       171     2012      12        27        362              0.046083      -6.664856       0.000000       0.130959   -9999.000000       0.019200       0.048500   -9999.000000
53873     53873     shanxi         112.8722       36.1036           96       171     2012      12        28        363              0.052000      -5.230927       0.000000       0.131802   -9999.000000   -9999.000000       0.061100       0.031000
53873     53873     shanxi         112.8722       36.1036           96       171     2012      12        29        364              0.000000      -4.441620       0.000000       0.139274   -9999.000000       0.191900   -9999.000000   -9999.000000
53873     53873     shanxi         112.8722       36.1036           96       171     2012      12        30        365              0.000000      -9.296478       0.000000       0.130801   -9999.000000   -9999.000000       0.048900       0.010000
53873     53873     shanxi         112.8722       36.1036           96       171     2012      12        31        366              0.037933      -8.121246       0.000000       0.128452   -9999.000000   -9999.000000       0.046400   -9999.000000
