# Supplementary material for: Research on Fusing Multisatellite Soil Moisture Data Based on Bayesian Model Averaging
Source: Hindawi journal article supplement (doi:10.1155/2018/9310838), 2018-06-25
Supplement: f1 [file 9310838.f1.zip › 2012_sm00-10cm_daily_ZDB_ZHY_53874_366days_allin.txt]

53874     53874     shanxi         112.0264       36.1769           95       168     2012      01        01        001              0.000000   -9999.000000       0.000000   -9999.000000       0.094000   -9999.000000       0.041200   -9999.000000
53874     53874     shanxi         112.0264       36.1769           95       168     2012      01        02        002              0.028875      -1.666931       0.000000       0.181131   -9999.000000       0.053900       0.045300       0.117000
53874     53874     shanxi         112.0264       36.1769           95       168     2012      01        03        003              0.000000      -3.061127       0.727436       0.167090   -9999.000000   -9999.000000   -9999.000000       0.009000
53874     53874     shanxi         112.0264       36.1769           95       168     2012      01        04        004              0.023917      -5.142487       2.166895       0.154526   -9999.000000       0.180900       0.042600   -9999.000000
53874     53874     shanxi         112.0264       36.1769           95       168     2012      01        05        005              0.025000      -5.394440       0.000000       0.152526   -9999.000000   -9999.000000       0.047900       0.021000
53874     53874     shanxi         112.0264       36.1769           95       168     2012      01        06        006              0.026625      -4.241699       0.000000       0.160319       0.088000   -9999.000000       0.045000   -9999.000000
53874     53874     shanxi         112.0264       36.1769           95       168     2012      01        07        007              0.027375      -2.177216       0.000000       0.176005   -9999.000000   -9999.000000       0.048500       0.071000
53874     53874     shanxi         112.0264       36.1769           95       168     2012      01        08        008              0.000000      -1.947754       0.000000       0.177460       0.089000   -9999.000000   -9999.000000   -9999.000000
53874     53874     shanxi         112.0264       36.1769           95       168     2012      01        09        009              0.028208      -1.633911       0.000000       0.181634   -9999.000000       0.186200   -9999.000000   -9999.000000
53874     53874     shanxi         112.0264       36.1769           95       168     2012      01        10        010              0.027458      -1.141785       0.000000       0.186907   -9999.000000   -9999.000000       0.036300       0.069000
53874     53874     shanxi         112.0264       36.1769           95       168     2012      01        11        011              0.026292      -1.625549       0.000000       0.184162   -9999.000000   -9999.000000       0.042500   -9999.000000
53874     53874     shanxi         112.0264       36.1769           95       168     2012      01        12        012              0.026000      -2.228149       0.000000       0.177204       0.096000       0.228900       0.039400       0.022000
53874     53874     shanxi         112.0264       36.1769           95       168     2012      01        13        013              0.026958      -1.922119       0.000000       0.180307       0.095000   -9999.000000       0.039200   -9999.000000
53874     53874     shanxi         112.0264       36.1769           95       168     2012      01        14        014              0.027000      -0.921661       0.000000       0.187661   -9999.000000   -9999.000000   -9999.000000   -9999.000000
53874     53874     shanxi         112.0264       36.1769           95       168     2012      01        15        015              0.028292      -1.425293       0.000000       0.184269   -9999.000000   -9999.000000       0.041900       0.095000
53874     53874     shanxi         112.0264       36.1769           95       168     2012      01        16        016              0.027917      -0.627319       0.000000       0.190901   -9999.000000   -9999.000000       0.040900       0.092000
53874     53874     shanxi         112.0264       36.1769           95       168     2012      01        17        017              0.000000      -1.373444       0.000000       0.182579   -9999.000000   -9999.000000       0.037100       0.092000
53874     53874     shanxi         112.0264       36.1769           95       168     2012      01        18        018              0.030708      -0.404083       0.000000       0.193412       0.096000       0.086400       0.038300   -9999.000000
53874     53874     shanxi         112.0264       36.1769           95       168     2012      01        19        019              0.031708       0.044189       1.367005       0.199084       0.098000   -9999.000000       0.035400       0.035000
53874     53874     shanxi         112.0264       36.1769           95       168     2012      01        20        020              0.031167       0.207642       0.739770       0.201572   -9999.000000   -9999.000000   -9999.000000       0.068000
53874     53874     shanxi         112.0264       36.1769           95       168     2012      01        21        021              0.028583      -1.745453       0.024504       0.184684   -9999.000000   -9999.000000       0.031600       0.086000
53874     53874     shanxi         112.0264       36.1769           95       168     2012      01        22        022              0.025833      -3.783325       0.341036       0.165473   -9999.000000       0.128300       0.035300       0.017000
53874     53874     shanxi         112.0264       36.1769           95       168     2012      01        23        023              0.023333      -5.471802       0.000000       0.153743   -9999.000000   -9999.000000       0.042000   -9999.000000
53874     53874     shanxi         112.0264       36.1769           95       168     2012      01        24        024              0.022333      -5.739655       0.000000       0.150231   -9999.000000   -9999.000000   -9999.000000       0.056000
53874     53874     shanxi         112.0264       36.1769           95       168     2012      01        25        025              0.022250      -6.137970       0.000000       0.149773   -9999.000000   -9999.000000   -9999.000000       0.016000
53874     53874     shanxi         112.0264       36.1769           95       168     2012      01        26        026              0.024042      -4.774506       0.000000       0.156291   -9999.000000   -9999.000000       0.040300       0.199000
53874     53874     shanxi         112.0264       36.1769           95       168     2012      01        27        027              0.025833      -2.479767       0.000000       0.174559       0.095000   -9999.000000       0.041900       0.098000
53874     53874     shanxi         112.0264       36.1769           95       168     2012      01        28        028              0.026792      -0.986725       0.000000       0.188854       0.107000       0.024200       0.045300   -9999.000000
53874     53874     shanxi         112.0264       36.1769           95       168     2012      01        29        029              0.027500      -0.362274       0.000000       0.193165       0.104000   -9999.000000       0.045700       0.053000
53874     53874     shanxi         112.0264       36.1769           95       168     2012      01        30        030              0.027083      -0.104462       0.000000       0.196864       0.107000       0.036000       0.048000       0.076000
53874     53874     shanxi         112.0264       36.1769           95       168     2012      01        31        031              0.031750      -0.324463       0.000000       0.192876   -9999.000000       0.038100   -9999.000000       0.300000
53874     53874     shanxi         112.0264       36.1769           95       168     2012      02        01        032              0.026833       0.897064       0.000000       0.205159   -9999.000000   -9999.000000       0.046400       0.036000
53874     53874     shanxi         112.0264       36.1769           95       168     2012      02        02        033              0.024917      -1.655121       0.000000       0.185664       0.095000       0.083800       0.050200   -9999.000000
53874     53874     shanxi         112.0264       36.1769           95       168     2012      02        03        034              0.027125      -2.187500       0.000000       0.177270       0.096000   -9999.000000       0.050500       0.064000
53874     53874     shanxi         112.0264       36.1769           95       168     2012      02        04        035              0.027750      -0.473633       0.000000       0.188335       0.097000   -9999.000000       0.049500   -9999.000000
53874     53874     shanxi         112.0264       36.1769           95       168     2012      02        05        036              0.030042      -0.136139       0.000000       0.194093   -9999.000000   -9999.000000       0.050700       0.203000
53874     53874     shanxi         112.0264       36.1769           95       168     2012      02        06        037              0.025417       0.897919       0.000000       0.204578   -9999.000000   -9999.000000   -9999.000000   -9999.000000
53874     53874     shanxi         112.0264       36.1769           95       168     2012      02        07        038              0.022667      -2.449615       0.000000       0.181759       0.087000       0.083700       0.046700   -9999.000000
53874     53874     shanxi         112.0264       36.1769           95       168     2012      02        08        039              0.020750      -3.773407       0.000000       0.166456   -9999.000000   -9999.000000       0.046100       0.072000
53874     53874     shanxi         112.0264       36.1769           95       168     2012      02        09        040              0.021750      -5.410645       0.000000       0.149654   -9999.000000   -9999.000000       0.050500   -9999.000000
53874     53874     shanxi         112.0264       36.1769           95       168     2012      02        10        041              0.023833      -3.586304       0.000000       0.159933   -9999.000000   -9999.000000       0.047300       0.056000
53874     53874     shanxi         112.0264       36.1769           95       168     2012      02        11        042              0.029833      -1.682190       0.000000       0.180932   -9999.000000   -9999.000000   -9999.000000   -9999.000000
53874     53874     shanxi         112.0264       36.1769           95       168     2012      02        12        043              0.027708       1.016296       0.000000       0.199964   -9999.000000   -9999.000000   -9999.000000       0.075000
53874     53874     shanxi         112.0264       36.1769           95       168     2012      02        13        044              0.026708      -0.717560       0.000000       0.190130   -9999.000000       0.031000   -9999.000000       0.135000
53874     53874     shanxi         112.0264       36.1769           95       168     2012      02        14        045              0.031750      -0.547577       0.000000       0.191730       0.085000   -9999.000000       0.054800       0.368000
53874     53874     shanxi         112.0264       36.1769           95       168     2012      02        15        046              0.030917       1.023895       0.000000       0.206542   -9999.000000   -9999.000000       0.053500       0.187000
53874     53874     shanxi         112.0264       36.1769           95       168     2012      02        16        047              0.028917       1.191193       0.000000       0.208028   -9999.000000   -9999.000000       0.048500   -9999.000000
53874     53874     shanxi         112.0264       36.1769           95       168     2012      02        17        048              0.025083      -0.541382       0.000000       0.191510   -9999.000000   -9999.000000   -9999.000000       0.149000
53874     53874     shanxi         112.0264       36.1769           95       168     2012      02        18        049              0.024375      -1.544556       0.000000       0.182838       0.094000       0.048400       0.050000       0.102000
53874     53874     shanxi         112.0264       36.1769           95       168     2012      02        19        050              0.029958      -0.994781       0.000000       0.185032       0.089000   -9999.000000       0.052600       0.205000
53874     53874     shanxi         112.0264       36.1769           95       168     2012      02        20        051              0.040042       1.518768       0.000000       0.199919       0.092000   -9999.000000       0.053600       0.187000
53874     53874     shanxi         112.0264       36.1769           95       168     2012      02        21        052              0.049292       3.195831       0.000000       0.217354   -9999.000000   -9999.000000   -9999.000000   -9999.000000
53874     53874     shanxi         112.0264       36.1769           95       168     2012      02        22        053              0.064375       4.057220       0.000000       0.224060   -9999.000000   -9999.000000       0.058000       0.317000
53874     53874     shanxi         112.0264       36.1769           95       168     2012      02        23        054              0.074833       4.527344       0.000000       0.230486       0.070000   -9999.000000   -9999.000000       0.234000
53874     53874     shanxi         112.0264       36.1769           95       168     2012      02        24        055              0.068542       3.403839       0.000000       0.223475       0.090000   -9999.000000       0.051000       0.325000
53874     53874     shanxi         112.0264       36.1769           95       168     2012      02        25        056              0.055833       2.798096       0.627234       0.221184   -9999.000000   -9999.000000       0.057400       0.178000
53874     53874     shanxi         112.0264       36.1769           95       168     2012      02        26        057              0.052458       0.539337       0.086349       0.202609   -9999.000000       0.038600       0.058000   -9999.000000
53874     53874     shanxi         112.0264       36.1769           95       168     2012      02        27        058              0.056500       2.079163       0.000000       0.211385   -9999.000000   -9999.000000   -9999.000000       0.134000
53874     53874     shanxi         112.0264       36.1769           95       168     2012      02        28        059              0.058542       3.093201       0.000000       0.217297       0.077000       0.024100   -9999.000000       0.297000
53874     53874     shanxi         112.0264       36.1769           95       168     2012      02        29        060              0.000000   -9999.000000       0.000000   -9999.000000       0.086000   -9999.000000   -9999.000000   -9999.000000
53874     53874     shanxi         112.0264       36.1769           95       168     2012      03        01        061              0.079958       3.480804       0.331662       0.222059   -9999.000000   -9999.000000       0.049300       0.499000
53874     53874     shanxi         112.0264       36.1769           95       168     2012      03        02        062              0.086875       2.905426       0.204335       0.228976   -9999.000000   -9999.000000       0.051200   -9999.000000
53874     53874     shanxi         112.0264       36.1769           95       168     2012      03        03        063              0.076083       2.835968       0.396477       0.226942   -9999.000000   -9999.000000       0.051500       0.180000
53874     53874     shanxi         112.0264       36.1769           95       168     2012      03        04        064              0.067917       2.586517       0.119218       0.222032       0.102000   -9999.000000       0.054900   -9999.000000
53874     53874     shanxi         112.0264       36.1769           95       168     2012      03        05        065              0.074708       3.169037       0.000000       0.226319       0.119000   -9999.000000   -9999.000000       0.299000
53874     53874     shanxi         112.0264       36.1769           95       168     2012      03        06        066              0.062167       2.811493       0.000000       0.219406       0.107000   -9999.000000       0.053700   -9999.000000
53874     53874     shanxi         112.0264       36.1769           95       168     2012      03        07        067              0.000000       2.667389       0.000000       0.214835       0.114000   -9999.000000       0.056200   -9999.000000
53874     53874     shanxi         112.0264       36.1769           95       168     2012      03        08        068              0.095125       5.676178       0.000000       0.230321   -9999.000000   -9999.000000       0.054800       0.256000
53874     53874     shanxi         112.0264       36.1769           95       168     2012      03        09        069              0.096375       5.478302       0.000000       0.228024       0.099000   -9999.000000       0.060400   -9999.000000
53874     53874     shanxi         112.0264       36.1769           95       168     2012      03        10        070              0.098292       5.379028       0.000000       0.228955       0.099000   -9999.000000       0.056600       0.312000
53874     53874     shanxi         112.0264       36.1769           95       168     2012      03        11        071              0.096625       6.642334       0.000000       0.226662       0.097000   -9999.000000   -9999.000000   -9999.000000
53874     53874     shanxi         112.0264       36.1769           95       168     2012      03        12        072              0.094875       5.988342       0.000000       0.222308       0.100000   -9999.000000       0.045500       0.341000
53874     53874     shanxi         112.0264       36.1769           95       168     2012      03        13        073              0.100958       6.094025       0.000000       0.221780   -9999.000000   -9999.000000       0.048600       0.342000
53874     53874     shanxi         112.0264       36.1769           95       168     2012      03        14        074              0.102957       8.852112       0.000000       0.226486       0.092000       0.079500   -9999.000000       0.594000
53874     53874     shanxi         112.0264       36.1769           95       168     2012      03        15        075              0.105208       9.963409       0.560562       0.224402       0.105000       0.082900       0.060800       0.388000
53874     53874     shanxi         112.0264       36.1769           95       168     2012      03        16        076              0.107792       4.876068       0.332287       0.228866       0.094000   -9999.000000   -9999.000000   -9999.000000
53874     53874     shanxi         112.0264       36.1769           95       168     2012      03        17        077              0.108375       7.672211       0.000000       0.236240       0.093000   -9999.000000       0.052800       0.532000
53874     53874     shanxi         112.0264       36.1769           95       168     2012      03        18        078              0.106208      11.788544       0.137363       0.231632   -9999.000000   -9999.000000       0.060700       0.333000
53874     53874     shanxi         112.0264       36.1769           95       168     2012      03        19        079              0.102375      10.709442       0.449910       0.224309   -9999.000000   -9999.000000       0.062600       0.449000
53874     53874     shanxi         112.0264       36.1769           95       168     2012      03        20        080              0.103458       4.502136       0.260297       0.227684       0.094000       0.287300       0.060100       0.345000
53874     53874     shanxi         112.0264       36.1769           95       168     2012      03        21        081              0.114542       7.775604       1.419870       0.232804   -9999.000000   -9999.000000       0.075900   -9999.000000
53874     53874     shanxi         112.0264       36.1769           95       168     2012      03        22        082              0.141417       3.623199       1.109034       0.234387   -9999.000000   -9999.000000   -9999.000000       0.615000
53874     53874     shanxi         112.0264       36.1769           95       168     2012      03        23        083              0.133625       4.262085       0.041488       0.251691   -9999.000000   -9999.000000       0.057900       0.324000
53874     53874     shanxi         112.0264       36.1769           95       168     2012      03        24        084              0.116000       6.768890       0.000000       0.239550   -9999.000000   -9999.000000   -9999.000000       0.548000
53874     53874     shanxi         112.0264       36.1769           95       168     2012      03        25        085              0.000000       9.613770       0.000000       0.235350       0.094000       0.166600       0.055600       0.333000
53874     53874     shanxi         112.0264       36.1769           95       168     2012      03        26        086              0.110000      11.881470       0.000000       0.227720       0.101500   -9999.000000       0.065000   -9999.000000
53874     53874     shanxi         112.0264       36.1769           95       168     2012      03        27        087              0.107458      13.002350       0.000000       0.219793       0.095000   -9999.000000       0.057700       0.293000
53874     53874     shanxi         112.0264       36.1769           95       168     2012      03        28        088              0.109208      15.031525       1.042395       0.211581       0.100000   -9999.000000   -9999.000000       0.357000
53874     53874     shanxi         112.0264       36.1769           95       168     2012      03        29        089              0.113417      14.429291       0.000000       0.216452       0.103000   -9999.000000       0.060000       0.690000
53874     53874     shanxi         112.0264       36.1769           95       168     2012      03        30        090              0.103167      14.420105       0.000000       0.220447       0.089000   -9999.000000       0.061400       0.200000
53874     53874     shanxi         112.0264       36.1769           95       168     2012      03        31        091              0.101125       9.381989       0.000000       0.215410       0.094500   -9999.000000       0.058600   -9999.000000
53874     53874     shanxi         112.0264       36.1769           95       168     2012      04        01        092              0.101083      13.363831       0.000000       0.207815       0.105000   -9999.000000       0.058500       0.296000
53874     53874     shanxi         112.0264       36.1769           95       168     2012      04        02        093              0.094375      15.691833       0.160540       0.202096       0.108000   -9999.000000   -9999.000000   -9999.000000
53874     53874     shanxi         112.0264       36.1769           95       168     2012      04        03        094              0.094333      10.039307       0.000000       0.205343       0.114000   -9999.000000       0.061100       0.283000
53874     53874     shanxi         112.0264       36.1769           95       168     2012      04        04        095              0.094167      13.319855       0.000000       0.199652       0.112000       0.068000       0.055100   -9999.000000
53874     53874     shanxi         112.0264       36.1769           95       168     2012      04        05        096              0.091208      16.011688       0.000000       0.193233       0.099500   -9999.000000       0.060900   -9999.000000
53874     53874     shanxi         112.0264       36.1769           95       168     2012      04        06        097              0.088542      16.428192       0.000000       0.188306       0.104000   -9999.000000       0.057000       0.258000
53874     53874     shanxi         112.0264       36.1769           95       168     2012      04        07        098              0.087583      16.772156       0.000000       0.184518       0.104000       0.010400       0.060200   -9999.000000
53874     53874     shanxi         112.0264       36.1769           95       168     2012      04        08        099              0.086000      17.972778       0.000000       0.181480       0.111000   -9999.000000   -9999.000000       0.246000
53874     53874     shanxi         112.0264       36.1769           95       168     2012      04        09        100              0.099208      19.897308       5.220532       0.178352       0.139000       0.186700       0.074600   -9999.000000
53874     53874     shanxi         112.0264       36.1769           95       168     2012      04        10        101              0.116125      17.045532       1.145174       0.216980       0.115000   -9999.000000       0.074200       0.666000
53874     53874     shanxi         112.0264       36.1769           95       168     2012      04        11        102              0.114167      16.130524       8.042338       0.244160       0.122000   -9999.000000       0.064500       0.307000
53874     53874     shanxi         112.0264       36.1769           95       168     2012      04        12        103              0.118583      16.429443       0.080542       0.253220       0.130000   -9999.000000       0.070300       0.547000
53874     53874     shanxi         112.0264       36.1769           95       168     2012      04        13        104              0.106208      13.448364       0.000000       0.265508   -9999.000000   -9999.000000       0.070700       0.334000
53874     53874     shanxi         112.0264       36.1769           95       168     2012      04        14        105              0.097958      15.919220       0.000000       0.243019       0.134000   -9999.000000       0.066800   -9999.000000
53874     53874     shanxi         112.0264       36.1769           95       168     2012      04        15        106              0.093792      16.012085       0.000000       0.231191       0.113000   -9999.000000       0.064400       0.484000
53874     53874     shanxi         112.0264       36.1769           95       168     2012      04        16        107              0.088167      18.274231       0.000000       0.219140       0.120000   -9999.000000       0.064400       0.296000
53874     53874     shanxi         112.0264       36.1769           95       168     2012      04        17        108              0.083417      19.136353       0.000000       0.206314       0.110000   -9999.000000       0.061700       0.484000
53874     53874     shanxi         112.0264       36.1769           95       168     2012      04        18        109              0.080292      18.584106       0.639287       0.200178       0.115000   -9999.000000   -9999.000000       0.205000
53874     53874     shanxi         112.0264       36.1769           95       168     2012      04        19        110              0.076250      19.801788       0.643213       0.194951       0.119000       0.038200   -9999.000000   -9999.000000
53874     53874     shanxi         112.0264       36.1769           95       168     2012      04        20        111              0.082500      20.844391       0.169548       0.192386       0.138000   -9999.000000       0.070100       0.369000
53874     53874     shanxi         112.0264       36.1769           95       168     2012      04        21        112              0.090417      17.702362       0.000000       0.197192       0.118500       0.159800       0.065200       0.251000
53874     53874     shanxi         112.0264       36.1769           95       168     2012      04        22        113              0.082958      20.349731       0.000000       0.189632       0.113000       0.023100       0.061300       0.567000
53874     53874     shanxi         112.0264       36.1769           95       168     2012      04        23        114              0.076375      23.492889       1.896631       0.182184       0.119000   -9999.000000       0.069500       0.456000
53874     53874     shanxi         112.0264       36.1769           95       168     2012      04        24        115              0.119542      24.909332       0.617969       0.183055       0.176000   -9999.000000       0.100200   -9999.000000
53874     53874     shanxi         112.0264       36.1769           95       168     2012      04        25        116              0.000000      15.186890       0.000000       0.213933       0.145000       0.088600   -9999.000000       0.286000
53874     53874     shanxi         112.0264       36.1769           95       168     2012      04        26        117              0.087625      16.764648       0.000000       0.195155       0.117500   -9999.000000       0.079200       0.317000
53874     53874     shanxi         112.0264       36.1769           95       168     2012      04        27        118              0.077292      21.279846       0.000000       0.183102       0.119500       0.104500   -9999.000000       0.198000
53874     53874     shanxi         112.0264       36.1769           95       168     2012      04        28        119              0.067750      23.104218       0.959424       0.175605       0.108000   -9999.000000       0.069600       0.255000
53874     53874     shanxi         112.0264       36.1769           95       168     2012      04        29        120              0.058125      24.952911       0.000000       0.178824       0.124000       0.118200       0.071900   -9999.000000
53874     53874     shanxi         112.0264       36.1769           95       168     2012      04        30        121              0.049958      24.563202       0.000000       0.176469       0.122000       0.268200   -9999.000000       0.268000
53874     53874     shanxi         112.0264       36.1769           95       168     2012      05        01        122              0.046792      23.334106       0.196156       0.173034       0.152500   -9999.000000       0.079700   -9999.000000
53874     53874     shanxi         112.0264       36.1769           95       168     2012      05        02        123              0.052875      23.185791       0.308503       0.171556       0.155500   -9999.000000       0.074000       0.299000
53874     53874     shanxi         112.0264       36.1769           95       168     2012      05        03        124              0.049917      23.815094       0.000000       0.172851       0.150000   -9999.000000       0.085300   -9999.000000
53874     53874     shanxi         112.0264       36.1769           95       168     2012      05        04        125              0.044792      24.980804       0.000000       0.168823   -9999.000000   -9999.000000       0.073600   -9999.000000
53874     53874     shanxi         112.0264       36.1769           95       168     2012      05        05        126              0.039083      25.903320       0.000000       0.165209       0.162000   -9999.000000       0.076800       0.263000
53874     53874     shanxi         112.0264       36.1769           95       168     2012      05        06        127              0.033333      26.521362       0.794419       0.164148       0.126000   -9999.000000   -9999.000000   -9999.000000
53874     53874     shanxi         112.0264       36.1769           95       168     2012      05        07        128              0.027667      27.824341       0.000000       0.166013   -9999.000000       0.032700       0.106200       0.335000
53874     53874     shanxi         112.0264       36.1769           95       168     2012      05        08        129              0.024833      24.888184       0.195255       0.170896       0.147000       0.042600       0.109500   -9999.000000
53874     53874     shanxi         112.0264       36.1769           95       168     2012      05        09        130              0.021667      26.092682       0.000000       0.167173       0.156000   -9999.000000       0.104100       0.291000
53874     53874     shanxi         112.0264       36.1769           95       168     2012      05        10        131              0.019958      24.969330       0.000000       0.165666       0.144000   -9999.000000       0.098300       0.262000
53874     53874     shanxi         112.0264       36.1769           95       168     2012      05        11        132              0.021208      27.543213       1.976579       0.162835       0.229000   -9999.000000       0.117100       0.471000
53874     53874     shanxi         112.0264       36.1769           95       168     2012      05        12        133              0.025333      21.696075       0.646985       0.183863       0.184000       0.102700   -9999.000000       0.253000
53874     53874     shanxi         112.0264       36.1769           95       168     2012      05        13        134              0.025500      18.245056       0.091110       0.185653       0.176000       0.159600       0.098500   -9999.000000
53874     53874     shanxi         112.0264       36.1769           95       168     2012      05        14        135              0.023833      19.817596       0.084170       0.172629       0.164000       0.220800       0.131700       0.206000
53874     53874     shanxi         112.0264       36.1769           95       168     2012      05        15        136              0.021333      21.495636       0.102212       0.166018       0.189000       0.052300       0.118300       0.261000
53874     53874     shanxi         112.0264       36.1769           95       168     2012      05        16        137              0.018958      22.384308       0.068316       0.162511       0.187000   -9999.000000       0.129600       0.519000
53874     53874     shanxi         112.0264       36.1769           95       168     2012      05        17        138              0.016833      23.351227       0.000000       0.160377       0.161500   -9999.000000   -9999.000000       0.304000
53874     53874     shanxi         112.0264       36.1769           95       168     2012      05        18        139              0.014375      25.202698       0.000000       0.158700       0.181000       0.182400       0.130000   -9999.000000
53874     53874     shanxi         112.0264       36.1769           95       168     2012      05        19        140              0.012917      26.403229       0.049097       0.158654       0.167000   -9999.000000       0.118300       0.372000
53874     53874     shanxi         112.0264       36.1769           95       168     2012      05        20        141              0.018625      27.936676       0.372495       0.158640   -9999.000000   -9999.000000       0.115000       0.295000
53874     53874     shanxi         112.0264       36.1769           95       168     2012      05        21        142              0.017125      27.795319       3.976728       0.159420       0.246000   -9999.000000       0.143100       0.470000
53874     53874     shanxi         112.0264       36.1769           95       168     2012      05        22        143              0.020333      19.673798       0.106389       0.194351       0.177000   -9999.000000       0.149600       0.317000
53874     53874     shanxi         112.0264       36.1769           95       168     2012      05        23        144              0.025042      20.062408       1.208674       0.211863   -9999.000000       0.251600   -9999.000000   -9999.000000
53874     53874     shanxi         112.0264       36.1769           95       168     2012      05        24        145              0.024792      21.612152       0.000000       0.201187       0.202000   -9999.000000       0.149000       0.194000
53874     53874     shanxi         112.0264       36.1769           95       168     2012      05        25        146              0.000000      20.701569       0.000000       0.189862       0.208000   -9999.000000       0.152300       0.334000
53874     53874     shanxi         112.0264       36.1769           95       168     2012      05        26        147              0.029042      23.032593       0.000000       0.175902       0.195000       0.157600       0.152400       0.472000
53874     53874     shanxi         112.0264       36.1769           95       168     2012      05        27        148              0.028833      24.427490       0.000000       0.167630       0.184500   -9999.000000       0.135500       0.247000
53874     53874     shanxi         112.0264       36.1769           95       168     2012      05        28        149              0.027750      26.924072      17.453655       0.162295       0.177000       0.064800       0.146800   -9999.000000
53874     53874     shanxi         112.0264       36.1769           95       168     2012      05        29        150              0.025875      26.293671       3.057952       0.203831       0.252000   -9999.000000   -9999.000000       0.526000
53874     53874     shanxi         112.0264       36.1769           95       168     2012      05        30        151              0.028375      21.796906       0.000000       0.285174       0.174000       0.184100       0.141100   -9999.000000
53874     53874     shanxi         112.0264       36.1769           95       168     2012      05        31        152              0.027542      23.446320       0.041888       0.243943       0.177000       0.064700   -9999.000000   -9999.000000
53874     53874     shanxi         112.0264       36.1769           95       168     2012      06        01        153              0.029917      21.932770       0.780309       0.228608       0.187000   -9999.000000       0.138800   -9999.000000
53874     53874     shanxi         112.0264       36.1769           95       168     2012      06        02        154              0.028458      24.415283       3.359413       0.216892       0.174000       0.072900       0.148600   -9999.000000
53874     53874     shanxi         112.0264       36.1769           95       168     2012      06        03        155              0.028750      23.713104       0.000000       0.230510       0.176000   -9999.000000   -9999.000000       0.318000
53874     53874     shanxi         112.0264       36.1769           95       168     2012      06        04        156              0.030167      24.085785       0.343300       0.218382   -9999.000000       0.040500       0.174000   -9999.000000
53874     53874     shanxi         112.0264       36.1769           95       168     2012      06        05        157              0.028000      26.761536       5.449691       0.198160   -9999.000000       0.244100       0.187000       0.363000
53874     53874     shanxi         112.0264       36.1769           95       168     2012      06        06        158              0.023458      24.900665       0.566988       0.218771       0.179000   -9999.000000       0.190300   -9999.000000
53874     53874     shanxi         112.0264       36.1769           95       168     2012      06        07        159              0.026458      19.339569       0.829137       0.248225       0.167000   -9999.000000       0.171100       0.567000
53874     53874     shanxi         112.0264       36.1769           95       168     2012      06        08        160              0.026750      23.534851       0.000000       0.225858       0.165000   -9999.000000       0.173200       0.341000
53874     53874     shanxi         112.0264       36.1769           95       168     2012      06        09        161              0.029958      24.006470       0.333879       0.207774       0.150000   -9999.000000   -9999.000000       0.488000
53874     53874     shanxi         112.0264       36.1769           95       168     2012      06        10        162              0.028667      27.288177       0.761650       0.190497   -9999.000000       0.146400       0.166900       0.315000
53874     53874     shanxi         112.0264       36.1769           95       168     2012      06        11        163              0.000000      25.530090       2.792548       0.184808       0.146000   -9999.000000       0.175700   -9999.000000
53874     53874     shanxi         112.0264       36.1769           95       168     2012      06        12        164              0.027750      26.756805       1.008954       0.173604       0.129000   -9999.000000       0.166800       0.396000
53874     53874     shanxi         112.0264       36.1769           95       168     2012      06        13        165              0.026333      28.925873       0.493369       0.167945       0.142000   -9999.000000       0.158900       0.342000
53874     53874     shanxi         112.0264       36.1769           95       168     2012      06        14        166              0.024250      29.292389       0.068293       0.167077       0.140000   -9999.000000       0.173600       0.500000
53874     53874     shanxi         112.0264       36.1769           95       168     2012      06        15        167              0.022708      27.529785       0.131293       0.165731       0.142000       0.231100   -9999.000000       0.337000
53874     53874     shanxi         112.0264       36.1769           95       168     2012      06        16        168              0.020833      28.248566       0.000000       0.162912       0.133000   -9999.000000       0.160700   -9999.000000
53874     53874     shanxi         112.0264       36.1769           95       168     2012      06        17        169              0.019125      29.335022       0.347192       0.161097       0.140000   -9999.000000       0.178000       0.445000
53874     53874     shanxi         112.0264       36.1769           95       168     2012      06        18        170              0.017792      30.319946       0.315432       0.161470       0.138000       0.244600       0.088000       0.391000
53874     53874     shanxi         112.0264       36.1769           95       168     2012      06        19        171              0.015750      31.216888       0.886510       0.161785       0.153000   -9999.000000       0.085000       0.598000
53874     53874     shanxi         112.0264       36.1769           95       168     2012      06        20        172              0.014042      30.034760       1.249277       0.166016       0.160000       0.025200   -9999.000000       0.440000
53874     53874     shanxi         112.0264       36.1769           95       168     2012      06        21        173              0.013000      28.601837       2.563352       0.168617       0.155000   -9999.000000       0.093900   -9999.000000
53874     53874     shanxi         112.0264       36.1769           95       168     2012      06        22        174              0.013375      27.360291       0.410025       0.193271       0.142000   -9999.000000       0.099500       0.393000
53874     53874     shanxi         112.0264       36.1769           95       168     2012      06        23        175              0.011917      29.736420       7.112378       0.180889       0.153000       0.189700       0.077400       0.543000
53874     53874     shanxi         112.0264       36.1769           95       168     2012      06        24        176              0.021417      27.512024      17.749565       0.228135       0.208000   -9999.000000       0.118600       0.696000
53874     53874     shanxi         112.0264       36.1769           95       168     2012      06        25        177              0.049042      24.444275       7.915164       0.318003       0.190000       0.185100       0.109800       0.859000
53874     53874     shanxi         112.0264       36.1769           95       168     2012      06        26        178              0.054625      23.309296       0.375226       0.300339       0.167000   -9999.000000   -9999.000000   -9999.000000
53874     53874     shanxi         112.0264       36.1769           95       168     2012      06        27        179              0.055750      23.255615       0.376742       0.280852       0.172000   -9999.000000       0.106200       0.677000
53874     53874     shanxi         112.0264       36.1769           95       168     2012      06        28        180              0.072708      22.040710      16.857122       0.267769       0.194000       0.138100       0.116100   -9999.000000
53874     53874     shanxi         112.0264       36.1769           95       168     2012      06        29        181              0.160792      21.993103       7.914266       0.295131       0.200500   -9999.000000       0.121700       0.948000
53874     53874     shanxi         112.0264       36.1769           95       168     2012      06        30        182              0.135917      22.057343       0.293334       0.325512       0.165000   -9999.000000       0.107500   -9999.000000
53874     53874     shanxi         112.0264       36.1769           95       168     2012      07        01        183              0.119208      25.535553       0.292474       0.292773   -9999.000000       0.087300       0.095600   -9999.000000
53874     53874     shanxi         112.0264       36.1769           95       168     2012      07        02        184              0.107625      27.243591       1.153544       0.273232       0.162000   -9999.000000   -9999.000000       0.525000
53874     53874     shanxi         112.0264       36.1769           95       168     2012      07        03        185              0.100708      26.881561       1.147845       0.262437       0.145000   -9999.000000       0.087700   -9999.000000
53874     53874     shanxi         112.0264       36.1769           95       168     2012      07        04        186              0.089750      27.024353       1.670205       0.258687       0.184500   -9999.000000       0.094400       0.477000
53874     53874     shanxi         112.0264       36.1769           95       168     2012      07        05        187              0.089417      23.945892       0.288404       0.267722       0.158000   -9999.000000       0.092200   -9999.000000
53874     53874     shanxi         112.0264       36.1769           95       168     2012      07        06        188              0.085417      26.938232       0.427257       0.251938   -9999.000000   -9999.000000       0.092800       0.455000
53874     53874     shanxi         112.0264       36.1769           95       168     2012      07        07        189              0.078500      27.129578       0.322495       0.237660   -9999.000000   -9999.000000   -9999.000000       0.451000
53874     53874     shanxi         112.0264       36.1769           95       168     2012      07        08        190              0.108083      25.539612      49.896187       0.235914   -9999.000000       0.103200       0.127100       0.616000
53874     53874     shanxi         112.0264       36.1769           95       168     2012      07        09        191              0.178625      23.674866       8.773076       0.326660       0.236500   -9999.000000       0.162800       1.000000
53874     53874     shanxi         112.0264       36.1769           95       168     2012      07        10        192              0.153125      22.740906       0.519998       0.348944       0.206000   -9999.000000       0.152300   -9999.000000
53874     53874     shanxi         112.0264       36.1769           95       168     2012      07        11        193              0.134917      26.918182       1.399645       0.319848       0.170000       0.180600       0.146400       0.821000
53874     53874     shanxi         112.0264       36.1769           95       168     2012      07        12        194              0.121375      27.245270       0.285665       0.309607       0.158000   -9999.000000       0.142200       0.574000
53874     53874     shanxi         112.0264       36.1769           95       168     2012      07        13        195              0.120000      27.657532      14.973791       0.293728       0.180000       0.275800   -9999.000000       0.639000
53874     53874     shanxi         112.0264       36.1769           95       168     2012      07        14        196              0.119458      24.623779       2.277139       0.325877       0.174500   -9999.000000       0.145100       0.804000
53874     53874     shanxi         112.0264       36.1769           95       168     2012      07        15        197              0.108792      23.846954       2.586716       0.315872       0.188000   -9999.000000       0.151400   -9999.000000
53874     53874     shanxi         112.0264       36.1769           95       168     2012      07        16        198              0.102583      22.934631       0.546528       0.314215       0.176000       0.364400       0.177200       0.755000
53874     53874     shanxi         112.0264       36.1769           95       168     2012      07        17        199              0.145917      23.996948       0.339221       0.301633       0.217000   -9999.000000       0.173500       0.582000
53874     53874     shanxi         112.0264       36.1769           95       168     2012      07        18        200              0.176292      24.798492       0.000000       0.292947       0.159000   -9999.000000   -9999.000000       0.735000
53874     53874     shanxi         112.0264       36.1769           95       168     2012      07        19        201              0.173000      25.246796       0.000000       0.284399       0.155000       0.110900       0.157000       0.507000
53874     53874     shanxi         112.0264       36.1769           95       168     2012      07        20        202              0.168870      26.733795       7.574703       0.273681       0.161000   -9999.000000       0.178400   -9999.000000
53874     53874     shanxi         112.0264       36.1769           95       168     2012      07        21        203              0.165522      26.850647       5.703027       0.301025       0.192000   -9999.000000       0.190000       0.901000
53874     53874     shanxi         112.0264       36.1769           95       168     2012      07        22        204              0.168625      24.861572       0.000000       0.311088       0.165000   -9999.000000       0.159600       0.616000
53874     53874     shanxi         112.0264       36.1769           95       168     2012      07        23        205              0.165500      25.730347       9.336742       0.291001   -9999.000000       0.214600       0.114300       0.611000
53874     53874     shanxi         112.0264       36.1769           95       168     2012      07        24        206              0.163958      25.163910       1.322335       0.327944       0.191000       0.182200   -9999.000000       0.589000
53874     53874     shanxi         112.0264       36.1769           95       168     2012      07        25        207              0.160625      25.463043       1.678238       0.301915       0.188000   -9999.000000       0.124400   -9999.000000
53874     53874     shanxi         112.0264       36.1769           95       168     2012      07        26        208              0.208750      27.351990       8.696898       0.295006       0.202000       0.080300       0.126300       0.786000
53874     53874     shanxi         112.0264       36.1769           95       168     2012      07        27        209              0.219167      27.415863       3.350641       0.312270       0.179000   -9999.000000       0.123000   -9999.000000
53874     53874     shanxi         112.0264       36.1769           95       168     2012      07        28        210              0.202000      27.717499       0.470088       0.307627   -9999.000000       0.162900       0.111700       0.665000
53874     53874     shanxi         112.0264       36.1769           95       168     2012      07        29        211              0.190250      29.272827       1.692961       0.288066       0.192000       0.032800       0.102600   -9999.000000
53874     53874     shanxi         112.0264       36.1769           95       168     2012      07        30        212              0.208750      28.878510      61.924541       0.282265       0.211000       0.132900   -9999.000000   -9999.000000
53874     53874     shanxi         112.0264       36.1769           95       168     2012      07        31        213              0.258208      26.213379      23.935379       0.347565       0.256500       0.119500       0.089100       0.967000
53874     53874     shanxi         112.0264       36.1769           95       168     2012      08        01        214              0.239417      22.718140       0.117072       0.366785       0.233000   -9999.000000       0.085600   -9999.000000
53874     53874     shanxi         112.0264       36.1769           95       168     2012      08        02        215              0.230375      23.179718       0.444589       0.340816       0.213000   -9999.000000       0.084900       0.863000
53874     53874     shanxi         112.0264       36.1769           95       168     2012      08        03        216              0.220417      25.424896       8.682889       0.329486       0.204000       0.253700       0.082200   -9999.000000
53874     53874     shanxi         112.0264       36.1769           95       168     2012      08        04        217              0.206833      25.858856       0.089175       0.321225       0.200000   -9999.000000   -9999.000000       0.680000
53874     53874     shanxi         112.0264       36.1769           95       168     2012      08        05        218              0.196042      26.139343       7.127543       0.315314       0.207500   -9999.000000       0.077600       0.798000
53874     53874     shanxi         112.0264       36.1769           95       168     2012      08        06        219              0.189833      24.717682       0.261298       0.330325       0.212000       0.037400       0.053700       0.787000
53874     53874     shanxi         112.0264       36.1769           95       168     2012      08        07        220              0.185125      25.833374       0.000000       0.316863       0.179000   -9999.000000       0.049700       0.647000
53874     53874     shanxi         112.0264       36.1769           95       168     2012      08        08        221              0.180042      27.009674       1.041732       0.306813       0.193000   -9999.000000       0.049200   -9999.000000
53874     53874     shanxi         112.0264       36.1769           95       168     2012      08        09        222              0.171792      27.165802       1.910267       0.305730       0.209000   -9999.000000       0.057300       0.673000
53874     53874     shanxi         112.0264       36.1769           95       168     2012      08        10        223              0.170625      22.779175       0.000000       0.310107       0.178500       0.300000   -9999.000000       0.602000
53874     53874     shanxi         112.0264       36.1769           95       168     2012      08        11        224              0.167250      25.400848       0.296578       0.295968       0.201000       0.082700       0.054000       0.669000
53874     53874     shanxi         112.0264       36.1769           95       168     2012      08        12        225              0.162542      26.186676       6.009831       0.292792       0.223000   -9999.000000       0.050300       0.710000
53874     53874     shanxi         112.0264       36.1769           95       168     2012      08        13        226              0.158000      23.686890      17.419964       0.306765       0.239000       0.273600       0.053200   -9999.000000
53874     53874     shanxi         112.0264       36.1769           95       168     2012      08        14        227              0.259250      21.758331      20.492609       0.324628       0.218000   -9999.000000       0.063900       0.977000
53874     53874     shanxi         112.0264       36.1769           95       168     2012      08        15        228              0.233625      20.716339       0.347369       0.360667       0.200000       0.309200       0.057500       0.814000
53874     53874     shanxi         112.0264       36.1769           95       168     2012      08        16        229              0.214833      24.462555       0.073916       0.330303       0.201000       0.174400   -9999.000000       0.782000
53874     53874     shanxi         112.0264       36.1769           95       168     2012      08        17        230              0.223958      24.156433      30.054541       0.320176       0.238000   -9999.000000       0.052900       0.850000
53874     53874     shanxi         112.0264       36.1769           95       168     2012      08        18        231              0.269667      22.862610      10.608482       0.344233   -9999.000000       0.247500       0.059800   -9999.000000
53874     53874     shanxi         112.0264       36.1769           95       168     2012      08        19        232              0.241750      21.838348       0.376102       0.359210       0.209000   -9999.000000       0.062400       0.854000
53874     53874     shanxi         112.0264       36.1769           95       168     2012      08        20        233              0.227875      22.220490       0.042916       0.337215       0.201000   -9999.000000       0.053500       0.791000
53874     53874     shanxi         112.0264       36.1769           95       168     2012      08        21        234              0.213667      22.709290       0.000000       0.328963       0.196500       0.247500   -9999.000000       0.862000
53874     53874     shanxi         112.0264       36.1769           95       168     2012      08        22        235              0.201625      21.946472       0.000000       0.318888       0.209000   -9999.000000       0.042700   -9999.000000
53874     53874     shanxi         112.0264       36.1769           95       168     2012      08        23        236              0.192250      21.576813       0.000000       0.312367       0.181000       0.426400       0.047900   -9999.000000
53874     53874     shanxi         112.0264       36.1769           95       168     2012      08        24        237              0.187458      20.137115       0.000000       0.308317   -9999.000000   -9999.000000       0.050300       0.586000
53874     53874     shanxi         112.0264       36.1769           95       168     2012      08        25        238              0.000000      21.860992       0.000000       0.302714       0.207000   -9999.000000       0.044400   -9999.000000
53874     53874     shanxi         112.0264       36.1769           95       168     2012      08        26        239              0.179083      21.731964       0.512388       0.301380       0.185000       0.154700       0.044000       0.621000
53874     53874     shanxi         112.0264       36.1769           95       168     2012      08        27        240              0.175958      23.372345       0.000000       0.298664       0.203000   -9999.000000   -9999.000000   -9999.000000
53874     53874     shanxi         112.0264       36.1769           95       168     2012      08        28        241              0.172583      23.204620       0.000000       0.295220       0.177000       0.110600       0.038700   -9999.000000
53874     53874     shanxi         112.0264       36.1769           95       168     2012      08        29        242              0.170875      24.308228       0.000000       0.289693       0.171000       0.015200       0.043100       0.516000
53874     53874     shanxi         112.0264       36.1769           95       168     2012      08        30        243              0.166750      25.286957       0.000000       0.282880       0.187000   -9999.000000       0.037300   -9999.000000
53874     53874     shanxi         112.0264       36.1769           95       168     2012      08        31        244              0.160875      25.090363       5.683859       0.278405       0.249000       0.216500       0.044800       0.576000
53874     53874     shanxi         112.0264       36.1769           95       168     2012      09        01        245              0.239375      21.511078      51.056103       0.299863       0.244000   -9999.000000       0.052100   -9999.000000
53874     53874     shanxi         112.0264       36.1769           95       168     2012      09        02        246              0.233833      19.026184       0.000000       0.377625       0.251500       0.336000   -9999.000000       0.774000
53874     53874     shanxi         112.0264       36.1769           95       168     2012      09        03        247              0.216083      19.773071       0.266229       0.338783       0.201000       0.151200       0.038200       0.689000
53874     53874     shanxi         112.0264       36.1769           95       168     2012      09        04        248              0.204042      20.164520       4.905035       0.325454   -9999.000000       0.212500       0.044800       0.735000
53874     53874     shanxi         112.0264       36.1769           95       168     2012      09        05        249              0.200958      20.828796       1.498853       0.322979       0.218000       0.131600       0.039700       0.699000
53874     53874     shanxi         112.0264       36.1769           95       168     2012      09        06        250              0.215583      20.711853       7.898221       0.328629       0.250000   -9999.000000       0.044700   -9999.000000
53874     53874     shanxi         112.0264       36.1769           95       168     2012      09        07        251              0.217750      18.527924       0.000000       0.338072       0.232000   -9999.000000   -9999.000000       0.779000
53874     53874     shanxi         112.0264       36.1769           95       168     2012      09        08        252              0.205167      21.253815       0.060448       0.324860       0.233000       0.247000       0.043400       0.691000
53874     53874     shanxi         112.0264       36.1769           95       168     2012      09        09        253              0.195583      21.304779       0.000000       0.317596       0.218000   -9999.000000       0.040600       0.770000
53874     53874     shanxi         112.0264       36.1769           95       168     2012      09        10        254              0.218250      21.833954      18.458141       0.309763       0.240000       0.349800       0.127800       0.970000
53874     53874     shanxi         112.0264       36.1769           95       168     2012      09        11        255              0.235417      18.396667       0.385212       0.343583       0.168500   -9999.000000       0.119900   -9999.000000
53874     53874     shanxi         112.0264       36.1769           95       168     2012      09        12        256              0.217583      20.047058       0.000000       0.332519       0.185000   -9999.000000       0.116100       0.655000
53874     53874     shanxi         112.0264       36.1769           95       168     2012      09        13        257              0.205250      15.972717       0.000000       0.320259       0.175000       0.250000   -9999.000000       0.549000
53874     53874     shanxi         112.0264       36.1769           95       168     2012      09        14        258              0.195792      16.511749       0.000000       0.313841       0.173000   -9999.000000       0.108600       0.686000
53874     53874     shanxi         112.0264       36.1769           95       168     2012      09        15        259              0.187000      18.302582       0.000000       0.309014       0.177000       0.381700       0.108300       0.582000
53874     53874     shanxi         112.0264       36.1769           95       168     2012      09        16        260              0.180250      18.510925       0.000000       0.305757       0.182000       0.130700       0.104300   -9999.000000
53874     53874     shanxi         112.0264       36.1769           95       168     2012      09        17        261              0.174125      18.509766       0.000000       0.302056       0.172000   -9999.000000       0.085100       0.491000
53874     53874     shanxi         112.0264       36.1769           95       168     2012      09        18        262              0.169625      18.028259       0.078824       0.299415       0.184000       0.109300   -9999.000000       0.601000
53874     53874     shanxi         112.0264       36.1769           95       168     2012      09        19        263              0.165458      18.231934       0.457406       0.298318       0.166000   -9999.000000       0.094700       0.511000
53874     53874     shanxi         112.0264       36.1769           95       168     2012      09        20        264              0.164292      18.788513       1.604684       0.297822   -9999.000000       0.077700       0.093900       0.524000
53874     53874     shanxi         112.0264       36.1769           95       168     2012      09        21        265              0.171292      18.787842       2.776107       0.298956   -9999.000000       0.099400       0.094100   -9999.000000
53874     53874     shanxi         112.0264       36.1769           95       168     2012      09        22        266              0.176250      16.433350       0.000000       0.313676       0.176500       0.241400       0.085900       0.574000
53874     53874     shanxi         112.0264       36.1769           95       168     2012      09        23        267              0.171208      19.240662       0.000000       0.302228       0.190500       0.034900       0.089800   -9999.000000
53874     53874     shanxi         112.0264       36.1769           95       168     2012      09        24        268              0.165667      19.739594       0.000000       0.297071       0.182000   -9999.000000   -9999.000000       0.550000
53874     53874     shanxi         112.0264       36.1769           95       168     2012      09        25        269              0.164500      19.522400       5.574655       0.293948       0.207000       0.113700       0.101400   -9999.000000
53874     53874     shanxi         112.0264       36.1769           95       168     2012      09        26        270              0.188042      18.145569       0.575209       0.308916       0.189000       0.225900       0.094200   -9999.000000
53874     53874     shanxi         112.0264       36.1769           95       168     2012      09        27        271              0.191786      16.981232       0.000000       0.311691       0.191000   -9999.000000       0.095100       0.537000
53874     53874     shanxi         112.0264       36.1769           95       168     2012      09        28        272              0.177733      16.271515       0.000000       0.301038       0.166000   -9999.000000       0.083000   -9999.000000
53874     53874     shanxi         112.0264       36.1769           95       168     2012      09        29        273              0.173500      14.604553       0.000000       0.294562       0.186000   -9999.000000       0.091300       0.502000
53874     53874     shanxi         112.0264       36.1769           95       168     2012      09        30        274              0.167583      15.154541       0.000000       0.291186       0.165000   -9999.000000   -9999.000000   -9999.000000
53874     53874     shanxi         112.0264       36.1769           95       168     2012      10        01        275              0.161750      15.530426       0.000000       0.287966       0.150000   -9999.000000       0.108800       0.555000
53874     53874     shanxi         112.0264       36.1769           95       168     2012      10        02        276              0.156792      16.683716       0.000000       0.284669       0.140000   -9999.000000       0.115400       0.560000
53874     53874     shanxi         112.0264       36.1769           95       168     2012      10        03        277              0.152042      18.293274       0.123558       0.283100       0.131500       0.192100       0.107500       0.673000
53874     53874     shanxi         112.0264       36.1769           95       168     2012      10        04        278              0.148208      18.413971       5.794497       0.281017       0.165000   -9999.000000       0.121800       0.828000
53874     53874     shanxi         112.0264       36.1769           95       168     2012      10        05        279              0.151000      16.581238       0.000000       0.301472       0.151000       0.134900   -9999.000000   -9999.000000
53874     53874     shanxi         112.0264       36.1769           95       168     2012      10        06        280              0.149208      15.573578       0.000000       0.294327       0.157000       0.062000       0.122100       0.547000
53874     53874     shanxi         112.0264       36.1769           95       168     2012      10        07        281              0.146583      16.484070       0.000000       0.287821       0.162000   -9999.000000       0.113200       0.571000
53874     53874     shanxi         112.0264       36.1769           95       168     2012      10        08        282              0.144917      15.962891       0.078259       0.286724       0.145000   -9999.000000       0.140500       0.690000
53874     53874     shanxi         112.0264       36.1769           95       168     2012      10        09        283              0.141000      16.606842       0.000000       0.284246       0.143500       0.031800       0.129800       0.432000
53874     53874     shanxi         112.0264       36.1769           95       168     2012      10        10        284              0.137542      14.539429       0.000000       0.278606       0.138000       0.186000       0.141700   -9999.000000
53874     53874     shanxi         112.0264       36.1769           95       168     2012      10        11        285              0.134375      14.812927       0.000000       0.276110       0.109000   -9999.000000   -9999.000000       0.528000
53874     53874     shanxi         112.0264       36.1769           95       168     2012      10        12        286              0.131208      16.289276       0.000000       0.275249       0.116000   -9999.000000       0.138200       0.520000
53874     53874     shanxi         112.0264       36.1769           95       168     2012      10        13        287              0.128542      16.081757       0.000000       0.274575       0.113000       0.132100       0.140200       0.634000
53874     53874     shanxi         112.0264       36.1769           95       168     2012      10        14        288              0.125875      16.539246       0.111846       0.272086       0.111000       0.042600       0.126600       0.490000
53874     53874     shanxi         112.0264       36.1769           95       168     2012      10        15        289              0.123917      15.893036       5.504628       0.270905       0.132500   -9999.000000       0.123500   -9999.000000
53874     53874     shanxi         112.0264       36.1769           95       168     2012      10        16        290              0.122000      13.133392       0.000000       0.285770       0.119000   -9999.000000       0.126900       0.415000
53874     53874     shanxi         112.0264       36.1769           95       168     2012      10        17        291              0.122000      10.380310       0.000000       0.292791   -9999.000000   -9999.000000   -9999.000000       0.389000
53874     53874     shanxi         112.0264       36.1769           95       168     2012      10        18        292              0.135750      10.286041       0.047657       0.283039       0.124000   -9999.000000       0.121200       0.448000
53874     53874     shanxi         112.0264       36.1769           95       168     2012      10        19        293              0.136125      12.981720       0.000000       0.280457       0.113500       0.213300       0.123700       0.357000
53874     53874     shanxi         112.0264       36.1769           95       168     2012      10        20        294              0.135250      13.080048       0.000000       0.278108       0.115500   -9999.000000       0.117900   -9999.000000
53874     53874     shanxi         112.0264       36.1769           95       168     2012      10        21        295              0.132083      14.995331       5.715730       0.275765       0.145000       0.151400       0.149500       0.656000
53874     53874     shanxi         112.0264       36.1769           95       168     2012      10        22        296              0.131833       9.374207       0.047594       0.300709   -9999.000000   -9999.000000   -9999.000000   -9999.000000
53874     53874     shanxi         112.0264       36.1769           95       168     2012      10        23        297              0.131333       9.449127       0.000000       0.291413   -9999.000000   -9999.000000       0.107700       0.434000
53874     53874     shanxi         112.0264       36.1769           95       168     2012      10        24        298              0.131583       8.262451       0.000000       0.287222   -9999.000000       0.151300       0.107400   -9999.000000
53874     53874     shanxi         112.0264       36.1769           95       168     2012      10        25        299              0.000000       9.718445       0.000000       0.284198       0.122000   -9999.000000       0.112200   -9999.000000
53874     53874     shanxi         112.0264       36.1769           95       168     2012      10        26        300              0.130625      11.718384       0.000000       0.282215       0.134500   -9999.000000       0.106400       0.372000
53874     53874     shanxi         112.0264       36.1769           95       168     2012      10        27        301              0.130375      10.100128       0.000000       0.282662       0.118000       0.100700       0.110900   -9999.000000
53874     53874     shanxi         112.0264       36.1769           95       168     2012      10        28        302              0.000000      11.933289       0.000000       0.279543       0.128000   -9999.000000   -9999.000000       0.489000
53874     53874     shanxi         112.0264       36.1769           95       168     2012      10        29        303              0.128417      12.868713       0.000000       0.278037       0.135000       0.022300       0.093100   -9999.000000
53874     53874     shanxi         112.0264       36.1769           95       168     2012      10        30        304              0.127250      10.638000       0.086430       0.276628       0.122000   -9999.000000       0.104300       0.296000
53874     53874     shanxi         112.0264       36.1769           95       168     2012      10        31        305              0.126500       8.435883       0.000000       0.273858       0.132000       0.241100       0.095800       0.348000
53874     53874     shanxi         112.0264       36.1769           95       168     2012      11        01        306              0.126083       8.671661       0.000000       0.271873       0.117000       0.124800       0.101800       0.540000
53874     53874     shanxi         112.0264       36.1769           95       168     2012      11        02        307              0.125542       9.339355       0.361276       0.271582       0.132000   -9999.000000       0.100800       0.417000
53874     53874     shanxi         112.0264       36.1769           95       168     2012      11        03        308              0.124167      11.117523       0.000000       0.270862   -9999.000000   -9999.000000   -9999.000000   -9999.000000
53874     53874     shanxi         112.0264       36.1769           95       168     2012      11        04        309              0.123417       3.716827       0.000000       0.250246   -9999.000000   -9999.000000       0.092700       0.363000
53874     53874     shanxi         112.0264       36.1769           95       168     2012      11        05        310              0.124708       2.170258       0.000000       0.235764       0.136000   -9999.000000       0.088700       0.355000
53874     53874     shanxi         112.0264       36.1769           95       168     2012      11        06        311              0.125792       3.567932       0.000000       0.252612       0.140000       0.142000       0.084400       0.564000
53874     53874     shanxi         112.0264       36.1769           95       168     2012      11        07        312              0.125625       6.121063       0.411582       0.267755       0.137000   -9999.000000       0.089500       0.309000
53874     53874     shanxi         112.0264       36.1769           95       168     2012      11        08        313              0.126208       5.207977       0.000000       0.268549       0.144000       0.195200   -9999.000000   -9999.000000
53874     53874     shanxi         112.0264       36.1769           95       168     2012      11        09        314              0.125792       7.158844       0.870203       0.270332       0.143000   -9999.000000       0.096900       0.387000
53874     53874     shanxi         112.0264       36.1769           95       168     2012      11        10        315              0.125333       5.506836       0.376363       0.274065       0.150000   -9999.000000       0.082300       0.315000
53874     53874     shanxi         112.0264       36.1769           95       168     2012      11        11        316              0.124458       2.972687       0.000000       0.254959       0.146000       0.142800       0.084700       0.395000
53874     53874     shanxi         112.0264       36.1769           95       168     2012      11        12        317              0.124875       2.934509       0.000000       0.246450       0.130000   -9999.000000       0.080800       0.324000
53874     53874     shanxi         112.0264       36.1769           95       168     2012      11        13        318              0.000000       3.851624       0.000000       0.260047   -9999.000000       0.257500       0.083600   -9999.000000
53874     53874     shanxi         112.0264       36.1769           95       168     2012      11        14        319              0.126792       4.553223       0.000000       0.258410   -9999.000000       0.151000   -9999.000000       0.266000
53874     53874     shanxi         112.0264       36.1769           95       168     2012      11        15        320              0.126000       5.458466       0.276838       0.265382       0.142000   -9999.000000       0.078400       0.497000
53874     53874     shanxi         112.0264       36.1769           95       168     2012      11        16        321              0.125667       3.180267       0.000000       0.262801       0.152000       0.031500       0.079200       0.323000
53874     53874     shanxi         112.0264       36.1769           95       168     2012      11        17        322              0.000000       3.413086       0.000000       0.251985       0.136000   -9999.000000       0.079600       0.380000
53874     53874     shanxi         112.0264       36.1769           95       168     2012      11        18        323              0.126208       5.255981       0.000000       0.263242       0.130000   -9999.000000       0.083700   -9999.000000
53874     53874     shanxi         112.0264       36.1769           95       168     2012      11        19        324              0.126667       5.171967       0.460032       0.262059   -9999.000000       0.070100   -9999.000000       0.331000
53874     53874     shanxi         112.0264       36.1769           95       168     2012      11        20        325              0.125875       5.518616       0.255800       0.266255       0.136000   -9999.000000       0.091100   -9999.000000
53874     53874     shanxi         112.0264       36.1769           95       168     2012      11        21        326              0.125500       4.166351       0.000000       0.270635       0.120000       0.166400       0.085100       0.379000
53874     53874     shanxi         112.0264       36.1769           95       168     2012      11        22        327              0.125250       5.274567       0.000000       0.269923       0.121000   -9999.000000       0.090400   -9999.000000
53874     53874     shanxi         112.0264       36.1769           95       168     2012      11        23        328              0.124208       3.202911       0.000000       0.253993       0.124000       0.154300       0.085300   -9999.000000
53874     53874     shanxi         112.0264       36.1769           95       168     2012      11        24        329              0.124708       2.313049       0.000000       0.232604       0.115000       0.115400       0.091900       0.266000
53874     53874     shanxi         112.0264       36.1769           95       168     2012      11        25        330              0.124083       3.387543       0.000000       0.252367   -9999.000000   -9999.000000   -9999.000000   -9999.000000
53874     53874     shanxi         112.0264       36.1769           95       168     2012      11        26        331              0.122417       1.929932       0.000000       0.236678       0.106000       0.107300   -9999.000000       0.227000
53874     53874     shanxi         112.0264       36.1769           95       168     2012      11        27        332              0.122542       1.652649       0.000000       0.223532       0.120000   -9999.000000       0.085400   -9999.000000
53874     53874     shanxi         112.0264       36.1769           95       168     2012      11        28        333              0.120500       2.380402       0.000000       0.235921       0.113000   -9999.000000       0.086600       0.135000
53874     53874     shanxi         112.0264       36.1769           95       168     2012      11        29        334              0.118750       0.947021       0.000000       0.217776       0.122000       0.047500       0.081500       0.139000
53874     53874     shanxi         112.0264       36.1769           95       168     2012      11        30        335              0.120833       0.460510       0.000000       0.207628   -9999.000000   -9999.000000       0.086400       0.342000
53874     53874     shanxi         112.0264       36.1769           95       168     2012      12        01        336              0.122042       1.884735       1.060675       0.226436   -9999.000000   -9999.000000   -9999.000000       0.346000
53874     53874     shanxi         112.0264       36.1769           95       168     2012      12        02        337              0.122083      -0.308838       0.000000       0.200980       0.125000   -9999.000000       0.076700   -9999.000000
53874     53874     shanxi         112.0264       36.1769           95       168     2012      12        03        338              0.118500       1.415436       0.000000       0.226963       0.127000   -9999.000000       0.077700       0.174000
53874     53874     shanxi         112.0264       36.1769           95       168     2012      12        04        339              0.119292       0.196167       0.000000       0.204497       0.117000   -9999.000000       0.074900       0.174000
53874     53874     shanxi         112.0264       36.1769           95       168     2012      12        05        340              0.116292       1.286285       0.000000       0.221755   -9999.000000   -9999.000000       0.072500       0.185000
53874     53874     shanxi         112.0264       36.1769           95       168     2012      12        06        341              0.116375      -0.422668       0.000000       0.196139   -9999.000000   -9999.000000   -9999.000000       0.196000
53874     53874     shanxi         112.0264       36.1769           95       168     2012      12        07        342              0.116042       0.250458       0.000000       0.206522       0.107000       0.050700       0.073300   -9999.000000
53874     53874     shanxi         112.0264       36.1769           95       168     2012      12        08        343              0.111958       0.022034       0.000000       0.203717       0.119000       0.094100       0.070000       0.120000
53874     53874     shanxi         112.0264       36.1769           95       168     2012      12        09        344              0.112083      -1.780029       0.000000       0.182833       0.115000       0.070700       0.080400       0.103000
53874     53874     shanxi         112.0264       36.1769           95       168     2012      12        10        345              0.111625      -1.149048       0.000000       0.186314   -9999.000000   -9999.000000       0.065600       0.252000
53874     53874     shanxi         112.0264       36.1769           95       168     2012      12        11        346              0.109625      -0.899231       0.000000       0.189925   -9999.000000       0.168700       0.065600       0.148000
53874     53874     shanxi         112.0264       36.1769           95       168     2012      12        12        347              0.110167      -1.361115       0.000000       0.185119       0.100000   -9999.000000   -9999.000000   -9999.000000
53874     53874     shanxi         112.0264       36.1769           95       168     2012      12        13        348              0.110750      -0.688782       0.223755       0.189371   -9999.000000   -9999.000000       0.072500       0.153000
53874     53874     shanxi         112.0264       36.1769           95       168     2012      12        14        349              0.111750      -1.127441       0.000000       0.183847   -9999.000000       0.098900       0.068600       0.081000
53874     53874     shanxi         112.0264       36.1769           95       168     2012      12        15        350              0.000000      -0.619476       0.000000       0.192545   -9999.000000   -9999.000000       0.071100       0.256000
53874     53874     shanxi         112.0264       36.1769           95       168     2012      12        16        351              0.114333       0.680176       0.000000       0.211195   -9999.000000   -9999.000000       0.074700       0.328000
53874     53874     shanxi         112.0264       36.1769           95       168     2012      12        17        352              0.114667      -0.003815       0.000000       0.203067   -9999.000000       0.174700       0.071300   -9999.000000
53874     53874     shanxi         112.0264       36.1769           95       168     2012      12        18        353              0.113250      -0.292877       0.000000       0.201848       0.100000   -9999.000000   -9999.000000       0.093000
53874     53874     shanxi         112.0264       36.1769           95       168     2012      12        19        354              0.110750      -0.854767      12.482017       0.190793   -9999.000000   -9999.000000       0.056800   -9999.000000
53874     53874     shanxi         112.0264       36.1769           95       168     2012      12        20        355              0.000000      -1.138336       1.156338       0.184271   -9999.000000   -9999.000000       0.062000       0.163000
53874     53874     shanxi         112.0264       36.1769           95       168     2012      12        21        356              0.110417      -2.295715       0.000000       0.169416   -9999.000000       0.071300       0.057600   -9999.000000
53874     53874     shanxi         112.0264       36.1769           95       168     2012      12        22        357              0.107417      -3.160828       0.000000       0.167360   -9999.000000   -9999.000000       0.058500   -9999.000000
53874     53874     shanxi         112.0264       36.1769           95       168     2012      12        23        358              0.104750      -6.237488       0.000000       0.150077   -9999.000000   -9999.000000   -9999.000000       0.013000
53874     53874     shanxi         112.0264       36.1769           95       168     2012      12        24        359              0.103625      -8.280579       0.000000       0.136239   -9999.000000       0.164000       0.062200   -9999.000000
53874     53874     shanxi         112.0264       36.1769           95       168     2012      12        25        360              0.104417      -5.423035       0.000000       0.145143   -9999.000000       0.145200       0.058700       0.040000
53874     53874     shanxi         112.0264       36.1769           95       168     2012      12        26        361              0.000000      -4.350067       0.000000       0.155411   -9999.000000       0.169500       0.064600   -9999.000000
53874     53874     shanxi         112.0264       36.1769           95       168     2012      12        27        362              0.104929      -3.659546       0.000000       0.158262   -9999.000000       0.060400       0.064100       0.051000
53874     53874     shanxi         112.0264       36.1769           95       168     2012      12        28        363              0.105000      -3.086334       0.000000       0.164535   -9999.000000   -9999.000000       0.067300       0.100000
53874     53874     shanxi         112.0264       36.1769           95       168     2012      12        29        364              0.000000      -3.955292       0.000000       0.156147   -9999.000000       0.203100   -9999.000000       0.064000
53874     53874     shanxi         112.0264       36.1769           95       168     2012      12        30        365              0.000000      -7.182434       0.000000       0.141148   -9999.000000       0.105600       0.055100       0.100000
53874     53874     shanxi         112.0264       36.1769           95       168     2012      12        31        366              0.103733      -5.591248       0.131672       0.146392   -9999.000000       0.192500       0.055300   -9999.000000
