# Supplementary material for: Research on Fusing Multisatellite Soil Moisture Data Based on Bayesian Model Averaging
Source: Hindawi journal article supplement (doi:10.1155/2018/9310838), 2018-06-25
Supplement: f1 [file 9310838.f1.zip › 2012_sm00-10cm_daily_ZDB_ZHY_53878_366days_allin.txt]

53878     53878     shanxi         113.3703       36.5139           94       173     2012      01        01        001              0.000000   -9999.000000       0.000000   -9999.000000       0.075000   -9999.000000       0.027000   -9999.000000
53878     53878     shanxi         113.3703       36.5139           94       173     2012      01        02        002              0.058292      -3.597961       0.000000       0.171039   -9999.000000       0.047600       0.033700       0.066000
53878     53878     shanxi         113.3703       36.5139           94       173     2012      01        03        003              0.000000      -4.113159       1.459498       0.164171   -9999.000000       0.135300   -9999.000000       0.099000
53878     53878     shanxi         113.3703       36.5139           94       173     2012      01        04        004              0.049333      -6.413696       0.000000       0.150551   -9999.000000   -9999.000000       0.029100   -9999.000000
53878     53878     shanxi         113.3703       36.5139           94       173     2012      01        05        005              0.047333      -6.875458       5.830682       0.151594   -9999.000000   -9999.000000       0.030600       0.068000
53878     53878     shanxi         113.3703       36.5139           94       173     2012      01        06        006              0.045625      -6.124481       5.261220       0.157404   -9999.000000   -9999.000000       0.029900       0.083000
53878     53878     shanxi         113.3703       36.5139           94       173     2012      01        07        007              0.047833      -5.195465      13.436514       0.160389   -9999.000000       0.041000       0.031800       0.078000
53878     53878     shanxi         113.3703       36.5139           94       173     2012      01        08        008              0.000000      -4.333771       0.000000       0.158397       0.083000   -9999.000000       0.029900       0.010000
53878     53878     shanxi         113.3703       36.5139           94       173     2012      01        09        009              0.052333      -3.603058       0.000000       0.172115   -9999.000000   -9999.000000   -9999.000000   -9999.000000
53878     53878     shanxi         113.3703       36.5139           94       173     2012      01        10        010              0.051833      -2.615173       0.000000       0.187235   -9999.000000   -9999.000000       0.017800       0.161000
53878     53878     shanxi         113.3703       36.5139           94       173     2012      01        11        011              0.048792      -3.428619       0.000000       0.179848   -9999.000000   -9999.000000       0.025900   -9999.000000
53878     53878     shanxi         113.3703       36.5139           94       173     2012      01        12        012              0.049417      -4.319061       0.000000       0.167104       0.077000       0.096900       0.029000       0.064000
53878     53878     shanxi         113.3703       36.5139           94       173     2012      01        13        013              0.050833      -3.692047       0.162519       0.176455       0.079000   -9999.000000       0.027300       0.054000
53878     53878     shanxi         113.3703       36.5139           94       173     2012      01        14        014              0.049792      -2.656799       5.452091       0.183259   -9999.000000   -9999.000000   -9999.000000   -9999.000000
53878     53878     shanxi         113.3703       36.5139           94       173     2012      01        15        015              0.051417      -2.695404       0.000000       0.180873   -9999.000000       0.079200       0.028100       0.057000
53878     53878     shanxi         113.3703       36.5139           94       173     2012      01        16        016              0.052000      -2.483276       2.886916       0.181675   -9999.000000       0.045700       0.021800   -9999.000000
53878     53878     shanxi         113.3703       36.5139           94       173     2012      01        17        017              0.000000      -3.696777       0.727926       0.168933   -9999.000000       0.180200       0.024400       0.077000
53878     53878     shanxi         113.3703       36.5139           94       173     2012      01        18        018              0.056083      -1.723846       0.000000       0.189373       0.086000       0.058300       0.028600   -9999.000000
53878     53878     shanxi         113.3703       36.5139           94       173     2012      01        19        019              0.058625      -1.785706       0.080429       0.187709   -9999.000000   -9999.000000       0.028500       0.031000
53878     53878     shanxi         113.3703       36.5139           94       173     2012      01        20        020              0.057375      -1.949921       0.000000       0.182461   -9999.000000   -9999.000000   -9999.000000       0.074000
53878     53878     shanxi         113.3703       36.5139           94       173     2012      01        21        021              0.052375      -4.168274       0.854945       0.165742   -9999.000000   -9999.000000       0.021600       0.076000
53878     53878     shanxi         113.3703       36.5139           94       173     2012      01        22        022              0.047708      -6.984283       1.880819       0.149891   -9999.000000       0.126000       0.022300       0.058000
53878     53878     shanxi         113.3703       36.5139           94       173     2012      01        23        023              0.045792      -7.329590       0.000000       0.147327   -9999.000000   -9999.000000       0.025700   -9999.000000
53878     53878     shanxi         113.3703       36.5139           94       173     2012      01        24        024              0.043417      -7.790955       0.000000       0.145992   -9999.000000   -9999.000000   -9999.000000       0.029000
53878     53878     shanxi         113.3703       36.5139           94       173     2012      01        25        025              0.042542      -8.082977       0.000000       0.146023   -9999.000000   -9999.000000       0.025400       0.101000
53878     53878     shanxi         113.3703       36.5139           94       173     2012      01        26        026              0.045000      -6.697052       0.847013       0.154132   -9999.000000   -9999.000000   -9999.000000       0.037000
53878     53878     shanxi         113.3703       36.5139           94       173     2012      01        27        027              0.044750      -3.804108       0.000000       0.177162   -9999.000000   -9999.000000       0.020900       0.138000
53878     53878     shanxi         113.3703       36.5139           94       173     2012      01        28        028              0.047792      -3.061035       0.000000       0.181117       0.094000       0.046300       0.026400   -9999.000000
53878     53878     shanxi         113.3703       36.5139           94       173     2012      01        29        029              0.048500      -1.946411       0.000000       0.190365   -9999.000000   -9999.000000       0.031000       0.063000
53878     53878     shanxi         113.3703       36.5139           94       173     2012      01        30        030              0.050417      -3.121796       0.000000       0.173276   -9999.000000       0.055900       0.028400       0.134000
53878     53878     shanxi         113.3703       36.5139           94       173     2012      01        31        031              0.054917      -2.451904       0.000000       0.185884   -9999.000000       0.047900   -9999.000000       0.102000
53878     53878     shanxi         113.3703       36.5139           94       173     2012      02        01        032              0.051417      -0.788116       0.000000       0.201040   -9999.000000   -9999.000000       0.024800       0.045000
53878     53878     shanxi         113.3703       36.5139           94       173     2012      02        02        033              0.047292      -3.951355       0.000000       0.178636       0.081000       0.041600       0.024500   -9999.000000
53878     53878     shanxi         113.3703       36.5139           94       173     2012      02        03        034              0.051583      -4.173218       0.000000       0.170722       0.088000   -9999.000000       0.029500       0.037000
53878     53878     shanxi         113.3703       36.5139           94       173     2012      02        04        035              0.052125      -2.149017       0.000000       0.186674   -9999.000000   -9999.000000       0.029700       0.121000
53878     53878     shanxi         113.3703       36.5139           94       173     2012      02        05        036              0.059583      -1.579926       0.000000       0.189088   -9999.000000   -9999.000000       0.034200       0.165000
53878     53878     shanxi         113.3703       36.5139           94       173     2012      02        06        037              0.054458      -0.192535       0.000000       0.207569   -9999.000000   -9999.000000   -9999.000000       0.025000
53878     53878     shanxi         113.3703       36.5139           94       173     2012      02        07        038              0.049167      -3.077087       0.000000       0.187653       0.076000       0.050000       0.027000   -9999.000000
53878     53878     shanxi         113.3703       36.5139           94       173     2012      02        08        039              0.046125      -5.189453       0.000000       0.161166   -9999.000000   -9999.000000       0.029400       0.018000
53878     53878     shanxi         113.3703       36.5139           94       173     2012      02        09        040              0.046833      -6.355865       0.000000       0.150259   -9999.000000   -9999.000000       0.031700   -9999.000000
53878     53878     shanxi         113.3703       36.5139           94       173     2012      02        10        041              0.050167      -4.674622       0.000000       0.159517   -9999.000000   -9999.000000       0.028700       0.101000
53878     53878     shanxi         113.3703       36.5139           94       173     2012      02        11        042              0.054958      -3.366333       0.000000       0.182087   -9999.000000   -9999.000000       0.034600       0.073000
53878     53878     shanxi         113.3703       36.5139           94       173     2012      02        12        043              0.057000      -0.689484       0.000000       0.196706   -9999.000000   -9999.000000   -9999.000000   -9999.000000
53878     53878     shanxi         113.3703       36.5139           94       173     2012      02        13        044              0.055292      -2.300049       0.000000       0.187272   -9999.000000       0.039800   -9999.000000       0.155000
53878     53878     shanxi         113.3703       36.5139           94       173     2012      02        14        045              0.060833      -1.479736       0.000000       0.194413   -9999.000000   -9999.000000       0.034300   -9999.000000
53878     53878     shanxi         113.3703       36.5139           94       173     2012      02        15        046              0.061292       0.104553       0.000000       0.209180   -9999.000000   -9999.000000       0.036100       0.130000
53878     53878     shanxi         113.3703       36.5139           94       173     2012      02        16        047              0.060417      -0.191650       0.000000       0.207872   -9999.000000   -9999.000000       0.034800   -9999.000000
53878     53878     shanxi         113.3703       36.5139           94       173     2012      02        17        048              0.056250      -1.913422       0.000000       0.194230   -9999.000000       0.114600   -9999.000000       0.030000
53878     53878     shanxi         113.3703       36.5139           94       173     2012      02        18        049              0.053333      -3.247742       0.000000       0.182539       0.084000       0.036700       0.031400       0.127000
53878     53878     shanxi         113.3703       36.5139           94       173     2012      02        19        050              0.055250      -3.490356       0.000000       0.182184       0.079000   -9999.000000       0.029100       0.116000
53878     53878     shanxi         113.3703       36.5139           94       173     2012      02        20        051              0.069083      -0.721924       0.000000       0.195786       0.079000       0.063900       0.032900       0.283000
53878     53878     shanxi         113.3703       36.5139           94       173     2012      02        21        052              0.078500       1.789337       0.000000       0.218353   -9999.000000       0.305400   -9999.000000   -9999.000000
53878     53878     shanxi         113.3703       36.5139           94       173     2012      02        22        053              0.086333       2.307617       0.000000       0.221731   -9999.000000   -9999.000000       0.039600       0.184000
53878     53878     shanxi         113.3703       36.5139           94       173     2012      02        23        054              0.096083       4.075897       0.000000       0.237905       0.073000   -9999.000000   -9999.000000       0.168000
53878     53878     shanxi         113.3703       36.5139           94       173     2012      02        24        055              0.099625       1.469635       0.000000       0.217819       0.079000   -9999.000000       0.029300       0.293000
53878     53878     shanxi         113.3703       36.5139           94       173     2012      02        25        056              0.096500       1.506805       0.000000       0.221143   -9999.000000   -9999.000000       0.031400       0.166000
53878     53878     shanxi         113.3703       36.5139           94       173     2012      02        26        057              0.088917      -0.919342       0.000000       0.197970   -9999.000000       0.067300       0.037400   -9999.000000
53878     53878     shanxi         113.3703       36.5139           94       173     2012      02        27        058              0.089667      -0.125793       0.000000       0.204005   -9999.000000   -9999.000000   -9999.000000       0.272000
53878     53878     shanxi         113.3703       36.5139           94       173     2012      02        28        059              0.101250       1.491058       0.000000       0.216838       0.071000   -9999.000000       0.034700       0.335000
53878     53878     shanxi         113.3703       36.5139           94       173     2012      02        29        060              0.000000   -9999.000000       0.000000   -9999.000000       0.079000   -9999.000000   -9999.000000   -9999.000000
53878     53878     shanxi         113.3703       36.5139           94       173     2012      03        01        061              0.130167       2.346741       0.000000       0.224383   -9999.000000   -9999.000000       0.016600       0.395000
53878     53878     shanxi         113.3703       36.5139           94       173     2012      03        02        062              0.131208       1.575317       0.000000       0.226592   -9999.000000   -9999.000000       0.031300   -9999.000000
53878     53878     shanxi         113.3703       36.5139           94       173     2012      03        03        063              0.127667       0.952484       0.000000       0.216938   -9999.000000   -9999.000000       0.032800       0.156000
53878     53878     shanxi         113.3703       36.5139           94       173     2012      03        04        064              0.136417       0.038544       0.000000       0.204642       0.106000       0.033200       0.044000       0.300000
53878     53878     shanxi         113.3703       36.5139           94       173     2012      03        05        065              0.150000       1.636719       0.000000       0.219413       0.112000   -9999.000000   -9999.000000       0.442000
53878     53878     shanxi         113.3703       36.5139           94       173     2012      03        06        066              0.138667       2.040314       0.000000       0.224640       0.104000   -9999.000000       0.035700       0.167000
53878     53878     shanxi         113.3703       36.5139           94       173     2012      03        07        067              0.000000       1.759308       0.000000       0.218187       0.101000       0.041800       0.033900   -9999.000000
53878     53878     shanxi         113.3703       36.5139           94       173     2012      03        08        068              0.158583       4.462128       0.000000       0.235124   -9999.000000   -9999.000000       0.037900       0.226000
53878     53878     shanxi         113.3703       36.5139           94       173     2012      03        09        069              0.159167       2.357941       0.000000       0.221322   -9999.000000       0.014300       0.045000       0.309000
53878     53878     shanxi         113.3703       36.5139           94       173     2012      03        10        070              0.167250       3.348236       0.000000       0.226928       0.092000   -9999.000000       0.046000       0.208000
53878     53878     shanxi         113.3703       36.5139           94       173     2012      03        11        071              0.165500       4.410553       0.000000       0.225396       0.089000   -9999.000000   -9999.000000       0.159000
53878     53878     shanxi         113.3703       36.5139           94       173     2012      03        12        072              0.162375       2.880890       0.000000       0.214929       0.086000   -9999.000000       0.031700   -9999.000000
53878     53878     shanxi         113.3703       36.5139           94       173     2012      03        13        073              0.164583       3.767639       0.000000       0.221821   -9999.000000   -9999.000000       0.036500       0.353000
53878     53878     shanxi         113.3703       36.5139           94       173     2012      03        14        074              0.164261       6.453217       0.000000       0.231910   -9999.000000   -9999.000000   -9999.000000   -9999.000000
53878     53878     shanxi         113.3703       36.5139           94       173     2012      03        15        075              0.161458       6.224243       0.000000       0.229747       0.080000       0.107400       0.048500       0.338000
53878     53878     shanxi         113.3703       36.5139           94       173     2012      03        16        076              0.160708       3.716492       0.000000       0.232686       0.087000   -9999.000000       0.046200   -9999.000000
53878     53878     shanxi         113.3703       36.5139           94       173     2012      03        17        077              0.157625       7.449768       0.000000       0.235449       0.082000   -9999.000000   -9999.000000       0.421000
53878     53878     shanxi         113.3703       36.5139           94       173     2012      03        18        078              0.154875      10.125671       0.032564       0.234693   -9999.000000   -9999.000000       0.030900       0.242000
53878     53878     shanxi         113.3703       36.5139           94       173     2012      03        19        079              0.159292       4.914917       0.000000       0.222332   -9999.000000   -9999.000000       0.044300       0.303000
53878     53878     shanxi         113.3703       36.5139           94       173     2012      03        20        080              0.158833       1.942413       0.000000       0.217557       0.092000   -9999.000000       0.052000       0.366000
53878     53878     shanxi         113.3703       36.5139           94       173     2012      03        21        081              0.171792       5.336182       0.990630       0.232546   -9999.000000   -9999.000000       0.058900   -9999.000000
53878     53878     shanxi         113.3703       36.5139           94       173     2012      03        22        082              0.190292       2.378082       4.391585       0.228157   -9999.000000       0.013100   -9999.000000       0.577000
53878     53878     shanxi         113.3703       36.5139           94       173     2012      03        23        083              0.170667       2.814667       0.047895       0.236688       0.101000   -9999.000000       0.043800       0.409000
53878     53878     shanxi         113.3703       36.5139           94       173     2012      03        24        084              0.163542       4.656311       0.000000       0.228995   -9999.000000       0.222400   -9999.000000       0.514000
53878     53878     shanxi         113.3703       36.5139           94       173     2012      03        25        085              0.000000       8.190643       0.000000       0.230915       0.091000       0.035700       0.045200       0.378000
53878     53878     shanxi         113.3703       36.5139           94       173     2012      03        26        086              0.159583      10.234528       0.000000       0.227952       0.094000   -9999.000000       0.050900   -9999.000000
53878     53878     shanxi         113.3703       36.5139           94       173     2012      03        27        087              0.158125      11.586426       0.000000       0.221147       0.082000       0.093700       0.049900       0.544000
53878     53878     shanxi         113.3703       36.5139           94       173     2012      03        28        088              0.156833      12.654053       0.274920       0.213731       0.083000   -9999.000000   -9999.000000       0.494000
53878     53878     shanxi         113.3703       36.5139           94       173     2012      03        29        089              0.156042      13.083801       0.000000       0.210690       0.079000   -9999.000000       0.036800       0.445000
53878     53878     shanxi         113.3703       36.5139           94       173     2012      03        30        090              0.154250      13.887817       1.374164       0.207979   -9999.000000       0.106100       0.043800       0.249000
53878     53878     shanxi         113.3703       36.5139           94       173     2012      03        31        091              0.153625       8.549805       0.000000       0.205696       0.073000   -9999.000000       0.039900   -9999.000000
53878     53878     shanxi         113.3703       36.5139           94       173     2012      04        01        092              0.152250      12.269958       0.000000       0.201237       0.084000   -9999.000000       0.043800       0.315000
53878     53878     shanxi         113.3703       36.5139           94       173     2012      04        02        093              0.150000      13.292419       0.400833       0.198028       0.084000       0.233500   -9999.000000       0.316000
53878     53878     shanxi         113.3703       36.5139           94       173     2012      04        03        094              0.152125       6.922150       0.000000       0.200900   -9999.000000   -9999.000000       0.046400       0.315000
53878     53878     shanxi         113.3703       36.5139           94       173     2012      04        04        095              0.152000      10.652344       0.000000       0.201504   -9999.000000       0.137500       0.033400       0.173000
53878     53878     shanxi         113.3703       36.5139           94       173     2012      04        05        096              0.151250      13.501801       0.000000       0.195385       0.074000   -9999.000000       0.042800   -9999.000000
53878     53878     shanxi         113.3703       36.5139           94       173     2012      04        06        097              0.151625      13.955627       0.000000       0.191217       0.080000   -9999.000000       0.043500       0.222000
53878     53878     shanxi         113.3703       36.5139           94       173     2012      04        07        098              0.152250      14.556580       0.135225       0.188037       0.080000       0.218900       0.043100   -9999.000000
53878     53878     shanxi         113.3703       36.5139           94       173     2012      04        08        099              0.152375      16.267548       0.000000       0.185217   -9999.000000   -9999.000000   -9999.000000       0.274000
53878     53878     shanxi         113.3703       36.5139           94       173     2012      04        09        100              0.153375      18.048096       0.551585       0.182590       0.098000       0.000600       0.064300       0.214000
53878     53878     shanxi         113.3703       36.5139           94       173     2012      04        10        101              0.157542      16.071503       2.326894       0.186438       0.086000   -9999.000000       0.061100   -9999.000000
53878     53878     shanxi         113.3703       36.5139           94       173     2012      04        11        102              0.162625      15.474976       6.120759       0.215096       0.093000       0.086100       0.072000       0.332000
53878     53878     shanxi         113.3703       36.5139           94       173     2012      04        12        103              0.171625      15.136353       0.194006       0.231922       0.112000       0.074200       0.067600   -9999.000000
53878     53878     shanxi         113.3703       36.5139           94       173     2012      04        13        104              0.163167      11.676239       0.000000       0.254793       0.092000   -9999.000000       0.055100       0.320000
53878     53878     shanxi         113.3703       36.5139           94       173     2012      04        14        105              0.159167      15.437653       0.000000       0.231344       0.088000       0.146400   -9999.000000   -9999.000000
53878     53878     shanxi         113.3703       36.5139           94       173     2012      04        15        106              0.158833      15.493530       0.000000       0.218469       0.088000   -9999.000000       0.040500       0.469000
53878     53878     shanxi         113.3703       36.5139           94       173     2012      04        16        107              0.157167      17.479401       0.000000       0.207652       0.086500   -9999.000000       0.051400       0.278000
53878     53878     shanxi         113.3703       36.5139           94       173     2012      04        17        108              0.155875      16.645691       0.053785       0.200524       0.071000       0.082900       0.042900       0.411000
53878     53878     shanxi         113.3703       36.5139           94       173     2012      04        18        109              0.155708      17.877869       0.380566       0.195978       0.084000   -9999.000000   -9999.000000       0.337000
53878     53878     shanxi         113.3703       36.5139           94       173     2012      04        19        110              0.155708      18.484467       1.128670       0.194138       0.083000   -9999.000000   -9999.000000   -9999.000000
53878     53878     shanxi         113.3703       36.5139           94       173     2012      04        20        111              0.154667      18.456482       5.298438       0.200113       0.102000       0.183600       0.048300       0.439000
53878     53878     shanxi         113.3703       36.5139           94       173     2012      04        21        112              0.156667      15.901154       0.560400       0.237588       0.098500       0.154300       0.040900       0.387000
53878     53878     shanxi         113.3703       36.5139           94       173     2012      04        22        113              0.156375      17.191620       0.844453       0.247694       0.094000   -9999.000000       0.047500       0.441000
53878     53878     shanxi         113.3703       36.5139           94       173     2012      04        23        114              0.160375      20.279297       3.611279       0.229762       0.087000   -9999.000000       0.056000       0.387000
53878     53878     shanxi         113.3703       36.5139           94       173     2012      04        24        115              0.211792      22.606110       2.299756       0.231196       0.130000       0.066100       0.092400   -9999.000000
53878     53878     shanxi         113.3703       36.5139           94       173     2012      04        25        116              0.000000      12.887238       0.000000       0.264647       0.112000       0.107100   -9999.000000       0.610000
53878     53878     shanxi         113.3703       36.5139           94       173     2012      04        26        117              0.176000      13.676300       0.000000       0.238540       0.086500       0.148700       0.056900       0.416000
53878     53878     shanxi         113.3703       36.5139           94       173     2012      04        27        118              0.170750      18.859955       0.000000       0.218767       0.089000       0.035100   -9999.000000       0.545000
53878     53878     shanxi         113.3703       36.5139           94       173     2012      04        28        119              0.165708      20.368835       0.244987       0.202673       0.079000   -9999.000000       0.055700       0.275000
53878     53878     shanxi         113.3703       36.5139           94       173     2012      04        29        120              0.163208      19.726959       0.000000       0.194790       0.071000       0.187100       0.050300   -9999.000000
53878     53878     shanxi         113.3703       36.5139           94       173     2012      04        30        121              0.162500      20.911346       1.586133       0.188455       0.086000   -9999.000000       0.067800       0.271000
53878     53878     shanxi         113.3703       36.5139           94       173     2012      05        01        122              0.160292      22.529541       0.000000       0.184268       0.106000   -9999.000000   -9999.000000       0.404000
53878     53878     shanxi         113.3703       36.5139           94       173     2012      05        02        123              0.157625      21.334412       0.000000       0.182775       0.111500       0.099200       0.054800       0.470000
53878     53878     shanxi         113.3703       36.5139           94       173     2012      05        03        124              0.152708      22.682129       0.000000       0.180268       0.095000       0.303100       0.067900       0.196000
53878     53878     shanxi         113.3703       36.5139           94       173     2012      05        04        125              0.146667      23.414520       0.253193       0.175657       0.099000       0.055000       0.060300   -9999.000000
53878     53878     shanxi         113.3703       36.5139           94       173     2012      05        05        126              0.138792      24.887482       0.000000       0.174153       0.104000   -9999.000000       0.066500       0.285000
53878     53878     shanxi         113.3703       36.5139           94       173     2012      05        06        127              0.131292      24.641388       0.000000       0.171863       0.098000   -9999.000000   -9999.000000   -9999.000000
53878     53878     shanxi         113.3703       36.5139           94       173     2012      05        07        128              0.124667      26.711395       0.000000       0.169421   -9999.000000       0.120100       0.081200       0.331000
53878     53878     shanxi         113.3703       36.5139           94       173     2012      05        08        129              0.119458      24.992035       0.894183       0.169295       0.102000   -9999.000000       0.076700       0.267000
53878     53878     shanxi         113.3703       36.5139           94       173     2012      05        09        130              0.116458      24.476807       0.836445       0.172275       0.102000   -9999.000000       0.087000   -9999.000000
53878     53878     shanxi         113.3703       36.5139           94       173     2012      05        10        131              0.118167      23.836670       0.000000       0.180114       0.100000   -9999.000000       0.078100       0.375000
53878     53878     shanxi         113.3703       36.5139           94       173     2012      05        11        132              0.115458      26.312439       1.501288       0.174955       0.151000   -9999.000000       0.085400   -9999.000000
53878     53878     shanxi         113.3703       36.5139           94       173     2012      05        12        133              0.110833      22.995880       0.000000       0.184091       0.116500   -9999.000000   -9999.000000       0.113000
53878     53878     shanxi         113.3703       36.5139           94       173     2012      05        13        134              0.108500      17.650269       0.000000       0.184876       0.110500       0.103100       0.075100   -9999.000000
53878     53878     shanxi         113.3703       36.5139           94       173     2012      05        14        135              0.102833      20.715363       0.000000       0.173689       0.106000   -9999.000000       0.087400       0.250000
53878     53878     shanxi         113.3703       36.5139           94       173     2012      05        15        136              0.097250      20.202087       0.000000       0.167868       0.098000       0.046500       0.068300       0.372000
53878     53878     shanxi         113.3703       36.5139           94       173     2012      05        16        137              0.091708      21.056488       0.000000       0.165316       0.110000   -9999.000000       0.077800       0.316000
53878     53878     shanxi         113.3703       36.5139           94       173     2012      05        17        138              0.087083      21.929993       0.000000       0.163751       0.101500       0.110500       0.076500       0.391000
53878     53878     shanxi         113.3703       36.5139           94       173     2012      05        18        139              0.082000      25.315247       0.000000       0.162348       0.114000   -9999.000000   -9999.000000   -9999.000000
53878     53878     shanxi         113.3703       36.5139           94       173     2012      05        19        140              0.000000      26.440796       0.433909       0.161763       0.111000   -9999.000000       0.060800       0.316000
53878     53878     shanxi         113.3703       36.5139           94       173     2012      05        20        141              0.000000      25.671936       0.127453       0.162962       0.096000       0.053100       0.078000       0.436000
53878     53878     shanxi         113.3703       36.5139           94       173     2012      05        21        142              0.000000      26.323425       0.635431       0.162171       0.133000       0.229200       0.082600       0.412000
53878     53878     shanxi         113.3703       36.5139           94       173     2012      05        22        143              0.000000      20.014709       0.635656       0.169232       0.124500       0.190300       0.086800       0.346000
53878     53878     shanxi         113.3703       36.5139           94       173     2012      05        23        144              0.111136      20.792358       8.188972       0.176545   -9999.000000       0.139900   -9999.000000   -9999.000000
53878     53878     shanxi         113.3703       36.5139           94       173     2012      05        24        145              0.163417      20.426788       0.000000       0.225019       0.155000   -9999.000000       0.095300       0.764000
53878     53878     shanxi         113.3703       36.5139           94       173     2012      05        25        146              0.000000      19.258453       0.000000       0.239130       0.125000       0.092800       0.077900       0.413000
53878     53878     shanxi         113.3703       36.5139           94       173     2012      05        26        147              0.147542      22.115295       3.800179       0.210479       0.120000   -9999.000000       0.088500       0.454000
53878     53878     shanxi         113.3703       36.5139           94       173     2012      05        27        148              0.141500      23.012604       0.000000       0.190650       0.129000   -9999.000000       0.082000       0.368000
53878     53878     shanxi         113.3703       36.5139           94       173     2012      05        28        149              0.136833      25.020935       0.682296       0.177848       0.113500       0.129500       0.085100   -9999.000000
53878     53878     shanxi         113.3703       36.5139           94       173     2012      05        29        150              0.127792      25.148346       0.274724       0.173069       0.133000   -9999.000000   -9999.000000       0.290000
53878     53878     shanxi         113.3703       36.5139           94       173     2012      05        30        151              0.126333      22.107330       0.127353       0.177736       0.122000       0.066100       0.072300   -9999.000000
53878     53878     shanxi         113.3703       36.5139           94       173     2012      05        31        152              0.120375      23.764679       0.130169       0.169686       0.120000       0.061800   -9999.000000   -9999.000000
53878     53878     shanxi         113.3703       36.5139           94       173     2012      06        01        153              0.121583      23.698975       6.506921       0.166053       0.160000   -9999.000000       0.075700       0.725000
53878     53878     shanxi         113.3703       36.5139           94       173     2012      06        02        154              0.169042      22.326813       1.503502       0.223572       0.142500       0.142000       0.091200   -9999.000000
53878     53878     shanxi         113.3703       36.5139           94       173     2012      06        03        155              0.167458      22.250000       0.880883       0.220086       0.149500   -9999.000000       0.095000       0.497000
53878     53878     shanxi         113.3703       36.5139           94       173     2012      06        04        156              0.155167      22.466827       5.475429       0.209053       0.119000       0.024200   -9999.000000   -9999.000000
53878     53878     shanxi         113.3703       36.5139           94       173     2012      06        05        157              0.146000      25.131409       0.598751       0.190253   -9999.000000       0.019400       0.060100       0.375000
53878     53878     shanxi         113.3703       36.5139           94       173     2012      06        06        158              0.134458      25.497284       0.000000       0.182137       0.132000   -9999.000000       0.094200       0.181000
53878     53878     shanxi         113.3703       36.5139           94       173     2012      06        07        159              0.133458      19.945770       3.207342       0.181643       0.120500       0.092200       0.089300   -9999.000000
53878     53878     shanxi         113.3703       36.5139           94       173     2012      06        08        160              0.128750      23.607788       0.000000       0.205622       0.137000       0.017900       0.093400       0.372000
53878     53878     shanxi         113.3703       36.5139           94       173     2012      06        09        161              0.122542      24.254242       0.815954       0.196376       0.121000       0.112300   -9999.000000   -9999.000000
53878     53878     shanxi         113.3703       36.5139           94       173     2012      06        10        162              0.113583      27.130951       0.542855       0.176153       0.119000       0.143700       0.085600       0.389000
53878     53878     shanxi         113.3703       36.5139           94       173     2012      06        11        163              0.000000      24.924561       0.000000       0.177622       0.116000   -9999.000000       0.086600   -9999.000000
53878     53878     shanxi         113.3703       36.5139           94       173     2012      06        12        164              0.101667      25.519073       0.000000       0.164592       0.117000       0.127700       0.105500       0.365000
53878     53878     shanxi         113.3703       36.5139           94       173     2012      06        13        165              0.094083      27.284760       0.029918       0.160057       0.126500       0.120400       0.094200       0.454000
53878     53878     shanxi         113.3703       36.5139           94       173     2012      06        14        166              0.087375      28.645294       0.000000       0.158148       0.115000   -9999.000000       0.093100       0.403000
53878     53878     shanxi         113.3703       36.5139           94       173     2012      06        15        167              0.081208      26.621857       0.000000       0.157039       0.116000       0.009300   -9999.000000       0.428000
53878     53878     shanxi         113.3703       36.5139           94       173     2012      06        16        168              0.076625      26.745941       0.000000       0.156201       0.121000   -9999.000000       0.083100   -9999.000000
53878     53878     shanxi         113.3703       36.5139           94       173     2012      06        17        169              0.072375      28.690643       0.000000       0.155305       0.123000   -9999.000000       0.098200       0.225000
53878     53878     shanxi         113.3703       36.5139           94       173     2012      06        18        170              0.067500      30.134033       0.000000       0.154338       0.114000       0.161100       0.073600       0.345000
53878     53878     shanxi         113.3703       36.5139           94       173     2012      06        19        171              0.064000      30.578705       0.496599       0.153667       0.116000   -9999.000000       0.088000       0.497000
53878     53878     shanxi         113.3703       36.5139           94       173     2012      06        20        172              0.059542      30.560059       1.090816       0.157228       0.110000       0.032600       0.091800       0.515000
53878     53878     shanxi         113.3703       36.5139           94       173     2012      06        21        173              0.057792      27.751953       2.953825       0.164562       0.140000   -9999.000000   -9999.000000   -9999.000000
53878     53878     shanxi         113.3703       36.5139           94       173     2012      06        22        174              0.058542      26.221252       3.640732       0.188772   -9999.000000   -9999.000000       0.087900       0.429000
53878     53878     shanxi         113.3703       36.5139           94       173     2012      06        23        175              0.057750      28.319824       0.533726       0.192233       0.144000       0.151500       0.095700       0.528000
53878     53878     shanxi         113.3703       36.5139           94       173     2012      06        24        176              0.062500      24.475525      20.657427       0.206510       0.173500       0.276000       0.113300       1.000000
53878     53878     shanxi         113.3703       36.5139           94       173     2012      06        25        177              0.066000      22.346710      22.405273       0.306041       0.157000       0.095200       0.124700       1.000000
53878     53878     shanxi         113.3703       36.5139           94       173     2012      06        26        178              0.071667      22.937042      21.127327       0.335363   -9999.000000       0.362400   -9999.000000   -9999.000000
53878     53878     shanxi         113.3703       36.5139           94       173     2012      06        27        179              0.070708      22.990356       2.979778       0.342144       0.157000   -9999.000000       0.107800       0.675000
53878     53878     shanxi         113.3703       36.5139           94       173     2012      06        28        180              0.096958      21.357544      34.931789       0.318879       0.142000       0.247900       0.126900       0.678000
53878     53878     shanxi         113.3703       36.5139           94       173     2012      06        29        181              0.231261      21.457886      15.295718       0.331631       0.187000   -9999.000000       0.123500       1.000000
53878     53878     shanxi         113.3703       36.5139           94       173     2012      06        30        182              0.192875      21.000458       5.277366       0.366225       0.139000       0.232600       0.115800   -9999.000000
53878     53878     shanxi         113.3703       36.5139           94       173     2012      07        01        183              0.170833      24.226807       8.618532       0.344318       0.144000       0.154700       0.102400   -9999.000000
53878     53878     shanxi         113.3703       36.5139           94       173     2012      07        02        184              0.164625      25.415955       1.762463       0.341132       0.169000   -9999.000000   -9999.000000       0.805000
53878     53878     shanxi         113.3703       36.5139           94       173     2012      07        03        185              0.162000      25.639740       0.000000       0.323244       0.154000       0.050400       0.088700   -9999.000000
53878     53878     shanxi         113.3703       36.5139           94       173     2012      07        04        186              0.155333      26.018066       1.014079       0.312735       0.197000   -9999.000000       0.106000       0.611000
53878     53878     shanxi         113.3703       36.5139           94       173     2012      07        05        187              0.159875      23.508087       0.000000       0.309265       0.130000   -9999.000000       0.094100       0.403000
53878     53878     shanxi         113.3703       36.5139           94       173     2012      07        06        188              0.157292      24.814728       0.000000       0.298833   -9999.000000       0.142600       0.099100   -9999.000000
53878     53878     shanxi         113.3703       36.5139           94       173     2012      07        07        189              0.158333      25.939850       1.982805       0.289639   -9999.000000   -9999.000000   -9999.000000       0.895000
53878     53878     shanxi         113.3703       36.5139           94       173     2012      07        08        190              0.190500      23.259521      32.260689       0.298294   -9999.000000       0.047500       0.118700   -9999.000000
53878     53878     shanxi         113.3703       36.5139           94       173     2012      07        09        191              0.250348      24.274780      44.814056       0.335302       0.234000   -9999.000000       0.124000       1.000000
53878     53878     shanxi         113.3703       36.5139           94       173     2012      07        10        192              0.203292      22.805023       0.737310       0.389537       0.180500       0.309300       0.135200   -9999.000000
53878     53878     shanxi         113.3703       36.5139           94       173     2012      07        11        193              0.182417      25.190247       0.000000       0.352575       0.165000       0.195000       0.121100       1.000000
53878     53878     shanxi         113.3703       36.5139           94       173     2012      07        12        194              0.172625      26.256714       0.000000       0.337223   -9999.000000   -9999.000000       0.119100       0.751000
53878     53878     shanxi         113.3703       36.5139           94       173     2012      07        13        195              0.193708      26.694214      30.653927       0.327064       0.197000       0.047500   -9999.000000       0.674000
53878     53878     shanxi         113.3703       36.5139           94       173     2012      07        14        196              0.222750      23.220490       3.921245       0.370115       0.184500       0.151700       0.127800       0.917000
53878     53878     shanxi         113.3703       36.5139           94       173     2012      07        15        197              0.197625      21.024384       2.809949       0.357639       0.192500   -9999.000000       0.129600   -9999.000000
53878     53878     shanxi         113.3703       36.5139           94       173     2012      07        16        198              0.183417      22.598083       0.000000       0.346562       0.164000   -9999.000000       0.135300       0.969000
53878     53878     shanxi         113.3703       36.5139           94       173     2012      07        17        199              0.217542      22.958374       0.000000       0.335718       0.147000   -9999.000000       0.127900       0.730000
53878     53878     shanxi         113.3703       36.5139           94       173     2012      07        18        200              0.243083      22.960968       0.000000       0.329449       0.168000   -9999.000000       0.125400       0.760000
53878     53878     shanxi         113.3703       36.5139           94       173     2012      07        19        201              0.239208      24.127045       0.000000       0.324197       0.171000       0.217200   -9999.000000       0.660000
53878     53878     shanxi         113.3703       36.5139           94       173     2012      07        20        202              0.237391      25.065948       0.454367       0.319152       0.151500       0.062700       0.111600   -9999.000000
53878     53878     shanxi         113.3703       36.5139           94       173     2012      07        21        203              0.239739      26.159729       1.770856       0.315746       0.181000       0.172900       0.129800       0.681000
53878     53878     shanxi         113.3703       36.5139           94       173     2012      07        22        204              0.239250      24.879730       0.000000       0.320020       0.164000   -9999.000000       0.121400       0.703000
53878     53878     shanxi         113.3703       36.5139           94       173     2012      07        23        205              0.234042      24.265381      24.191986       0.311702       0.189000       0.315600       0.102000       0.693000
53878     53878     shanxi         113.3703       36.5139           94       173     2012      07        24        206              0.231125      23.924225       0.127493       0.307475       0.201000       0.047300   -9999.000000       0.698000
53878     53878     shanxi         113.3703       36.5139           94       173     2012      07        25        207              0.228125      25.469818       0.302814       0.302749       0.165500   -9999.000000       0.099100   -9999.000000
53878     53878     shanxi         113.3703       36.5139           94       173     2012      07        26        208              0.223083      27.132507       0.807645       0.299223       0.190500       0.095200       0.098900       0.547000
53878     53878     shanxi         113.3703       36.5139           94       173     2012      07        27        209              0.217958      26.986542       0.632917       0.297417       0.175000   -9999.000000       0.107200       0.713000
53878     53878     shanxi         113.3703       36.5139           94       173     2012      07        28        210              0.213250      27.855621       0.000000       0.290792       0.159000   -9999.000000       0.101900       0.682000
53878     53878     shanxi         113.3703       36.5139           94       173     2012      07        29        211              0.227292      28.231201       3.379799       0.284313       0.199000   -9999.000000       0.099400       0.526000
53878     53878     shanxi         113.3703       36.5139           94       173     2012      07        30        212              0.258000      29.137634      31.641661       0.282132       0.138000       0.229600   -9999.000000   -9999.000000
53878     53878     shanxi         113.3703       36.5139           94       173     2012      07        31        213              0.320958      26.763733      24.903214       0.325540       0.245000       0.172500       0.101400       0.974000
53878     53878     shanxi         113.3703       36.5139           94       173     2012      08        01        214              0.293958      22.978943       1.932587       0.376663       0.216000   -9999.000000       0.100300   -9999.000000
53878     53878     shanxi         113.3703       36.5139           94       173     2012      08        02        215              0.282625      23.704559       0.770957       0.347352       0.197000       0.158800       0.092200       0.820000
53878     53878     shanxi         113.3703       36.5139           94       173     2012      08        03        216              0.272167      24.172852       0.000000       0.340058       0.211000       0.051000       0.097900       0.847000
53878     53878     shanxi         113.3703       36.5139           94       173     2012      08        04        217              0.261750      24.395874       1.170140       0.330780       0.218000   -9999.000000       0.091200   -9999.000000
53878     53878     shanxi         113.3703       36.5139           94       173     2012      08        05        218              0.258500      25.409454       1.551284       0.324390       0.206000       0.170600   -9999.000000       0.813000
53878     53878     shanxi         113.3703       36.5139           94       173     2012      08        06        219              0.253667      23.955719       0.401014       0.328179       0.214000       0.321700       0.106400   -9999.000000
53878     53878     shanxi         113.3703       36.5139           94       173     2012      08        07        220              0.246417      24.916046       0.000000       0.320452       0.171000   -9999.000000   -9999.000000       0.740000
53878     53878     shanxi         113.3703       36.5139           94       173     2012      08        08        221              0.246167      26.156189       5.825644       0.313812   -9999.000000       0.120900       0.114700   -9999.000000
53878     53878     shanxi         113.3703       36.5139           94       173     2012      08        09        222              0.309708      26.566101      13.643879       0.320455       0.206000   -9999.000000       0.128800       1.000000
53878     53878     shanxi         113.3703       36.5139           94       173     2012      08        10        223              0.280375      22.567749       0.000000       0.349200       0.180000       0.196200   -9999.000000       0.795000
53878     53878     shanxi         113.3703       36.5139           94       173     2012      08        11        224              0.268833      24.058319       0.000000       0.325301       0.217000       0.211800       0.121900       0.800000
53878     53878     shanxi         113.3703       36.5139           94       173     2012      08        12        225              0.268667      25.825134       3.575149       0.318387       0.238000   -9999.000000       0.117500       0.832000
53878     53878     shanxi         113.3703       36.5139           94       173     2012      08        13        226              0.263750      22.215607       2.825773       0.328173       0.227000       0.089100       0.091000   -9999.000000
53878     53878     shanxi         113.3703       36.5139           94       173     2012      08        14        227              0.320875      20.986389      24.025085       0.324640       0.237000   -9999.000000       0.114700       0.982000
53878     53878     shanxi         113.3703       36.5139           94       173     2012      08        15        228              0.292708      20.023529       0.000000       0.365973       0.224000   -9999.000000       0.102000       0.882000
53878     53878     shanxi         113.3703       36.5139           94       173     2012      08        16        229              0.281417      22.996155       0.000000       0.338185       0.196500       0.269200   -9999.000000       0.849000
53878     53878     shanxi         113.3703       36.5139           94       173     2012      08        17        230              0.287417      23.440552      16.207253       0.328575       0.204000       0.480400       0.099900       0.746000
53878     53878     shanxi         113.3703       36.5139           94       173     2012      08        18        231              0.331167      22.491486      11.061869       0.341799   -9999.000000       0.102500       0.105500   -9999.000000
53878     53878     shanxi         113.3703       36.5139           94       173     2012      08        19        232              0.303417      21.484741       0.511812       0.364484       0.209000   -9999.000000       0.103900       0.937000
53878     53878     shanxi         113.3703       36.5139           94       173     2012      08        20        233              0.292083      23.068542       0.122743       0.342177       0.214000       0.348200       0.146200       0.863000
53878     53878     shanxi         113.3703       36.5139           94       173     2012      08        21        234              0.281167      23.882690       0.000000       0.334698       0.196000       0.103400       0.140100       0.827000
53878     53878     shanxi         113.3703       36.5139           94       173     2012      08        22        235              0.269458      21.607117       0.000000       0.326528       0.205000   -9999.000000   -9999.000000   -9999.000000
53878     53878     shanxi         113.3703       36.5139           94       173     2012      08        23        236              0.260167      20.319916       0.000000       0.321630       0.186000       0.060900       0.118500   -9999.000000
53878     53878     shanxi         113.3703       36.5139           94       173     2012      08        24        237              0.254542      19.739349       0.000000       0.318672       0.183000       0.477500       0.146300       0.673000
53878     53878     shanxi         113.3703       36.5139           94       173     2012      08        25        238              0.000000      20.884033       0.000000       0.314748       0.204000   -9999.000000       0.126700       0.712000
53878     53878     shanxi         113.3703       36.5139           94       173     2012      08        26        239              0.247500      21.333344       0.000000       0.312540       0.233000       0.100900       0.131000       0.712000
53878     53878     shanxi         113.3703       36.5139           94       173     2012      08        27        240              0.244000      22.526031       1.249153       0.309351       0.211500   -9999.000000   -9999.000000       0.500000
53878     53878     shanxi         113.3703       36.5139           94       173     2012      08        28        241              0.240208      22.394012       0.270988       0.309664       0.165000       0.062300       0.114900   -9999.000000
53878     53878     shanxi         113.3703       36.5139           94       173     2012      08        29        242              0.235125      23.065857       0.000000       0.304811       0.158000       0.171900       0.110900       0.597000
53878     53878     shanxi         113.3703       36.5139           94       173     2012      08        30        243              0.231292      23.553894       0.000000       0.299296       0.207000       0.204700       0.115700   -9999.000000
53878     53878     shanxi         113.3703       36.5139           94       173     2012      08        31        244              0.231417      23.994781       1.811257       0.296333       0.218000       0.121200       0.110700       0.613000
53878     53878     shanxi         113.3703       36.5139           94       173     2012      09        01        245              0.265739      21.755646       8.144197       0.303895       0.204000   -9999.000000       0.131600       0.924000
53878     53878     shanxi         113.3703       36.5139           94       173     2012      09        02        246              0.276625      20.705872       0.223810       0.329602       0.188000       0.265000   -9999.000000   -9999.000000
53878     53878     shanxi         113.3703       36.5139           94       173     2012      09        03        247              0.259167      19.405609       0.000000       0.316360       0.164000       0.106100       0.136000       0.613000
53878     53878     shanxi         113.3703       36.5139           94       173     2012      09        04        248              0.248042      19.947571       5.917253       0.306403       0.185000   -9999.000000       0.153000   -9999.000000
53878     53878     shanxi         113.3703       36.5139           94       173     2012      09        05        249              0.291542      20.346710       1.710839       0.307656   -9999.000000       0.101700       0.158900       0.746000
53878     53878     shanxi         113.3703       36.5139           94       173     2012      09        06        250              0.278500      19.882874       9.505073       0.325305       0.203000   -9999.000000       0.169000   -9999.000000
53878     53878     shanxi         113.3703       36.5139           94       173     2012      09        07        251              0.269333      18.521881       0.000000       0.337952       0.191000   -9999.000000   -9999.000000       0.826000
53878     53878     shanxi         113.3703       36.5139           94       173     2012      09        08        252              0.257125      20.490417       0.000000       0.323729       0.167000       0.189900       0.166800       0.739000
53878     53878     shanxi         113.3703       36.5139           94       173     2012      09        09        253              0.247458      20.401093       0.000000       0.315229       0.154000   -9999.000000       0.141600       0.706000
53878     53878     shanxi         113.3703       36.5139           94       173     2012      09        10        254              0.270833      20.124603      12.824503       0.307933       0.213000       0.054000       0.107300       1.000000
53878     53878     shanxi         113.3703       36.5139           94       173     2012      09        11        255              0.293083      18.324554       0.385998       0.332929       0.184000   -9999.000000       0.098700   -9999.000000
53878     53878     shanxi         113.3703       36.5139           94       173     2012      09        12        256              0.270375      19.516174       0.841409       0.329555       0.144000       0.243400       0.099200       0.732000
53878     53878     shanxi         113.3703       36.5139           94       173     2012      09        13        257              0.255500      15.255524       0.000000       0.318624       0.158000       0.322300   -9999.000000       0.539000
53878     53878     shanxi         113.3703       36.5139           94       173     2012      09        14        258              0.245542      15.750214       0.000000       0.312587       0.145000   -9999.000000       0.093700       0.621000
53878     53878     shanxi         113.3703       36.5139           94       173     2012      09        15        259              0.237583      16.999481       0.000000       0.308435       0.171000       0.119000       0.094000       0.587000
53878     53878     shanxi         113.3703       36.5139           94       173     2012      09        16        260              0.231667      17.031708       0.000000       0.305062       0.176000       0.285300       0.098300   -9999.000000
53878     53878     shanxi         113.3703       36.5139           94       173     2012      09        17        261              0.226583      17.016571       0.000000       0.301814       0.164000   -9999.000000       0.069100       0.512000
53878     53878     shanxi         113.3703       36.5139           94       173     2012      09        18        262              0.222417      17.589355       1.342574       0.299677       0.184000       0.219300       0.068800       0.723000
53878     53878     shanxi         113.3703       36.5139           94       173     2012      09        19        263              0.220708      16.966217       3.684225       0.303463   -9999.000000   -9999.000000   -9999.000000       0.695000
53878     53878     shanxi         113.3703       36.5139           94       173     2012      09        20        264              0.219167      15.862122       0.000000       0.315647       0.159000   -9999.000000       0.059100       0.649000
53878     53878     shanxi         113.3703       36.5139           94       173     2012      09        21        265              0.220250      17.495392       2.218072       0.306366   -9999.000000       0.198400       0.074800   -9999.000000
53878     53878     shanxi         113.3703       36.5139           94       173     2012      09        22        266              0.220375      15.450531       0.000000       0.314769       0.177000       0.435000       0.074800       0.595000
53878     53878     shanxi         113.3703       36.5139           94       173     2012      09        23        267              0.216583      18.393616       0.000000       0.306784       0.160500       0.033000       0.076800       0.752000
53878     53878     shanxi         113.3703       36.5139           94       173     2012      09        24        268              0.214875      18.898041       0.000000       0.302871       0.165000   -9999.000000   -9999.000000       0.675000
53878     53878     shanxi         113.3703       36.5139           94       173     2012      09        25        269              0.214750      17.952545       2.794576       0.299586       0.179000       0.189600       0.117000       0.845000
53878     53878     shanxi         113.3703       36.5139           94       173     2012      09        26        270              0.218792      17.244354       0.385972       0.308566       0.175000       0.113200       0.094800   -9999.000000
53878     53878     shanxi         113.3703       36.5139           94       173     2012      09        27        271              0.221857      16.495331       0.000000       0.309175       0.177000   -9999.000000       0.108700       0.558000
53878     53878     shanxi         113.3703       36.5139           94       173     2012      09        28        272              0.211267      15.534698       0.000000       0.299981       0.162000   -9999.000000       0.106300   -9999.000000
53878     53878     shanxi         113.3703       36.5139           94       173     2012      09        29        273              0.210000      13.284851       0.000000       0.295125       0.176500   -9999.000000       0.112900       0.512000
53878     53878     shanxi         113.3703       36.5139           94       173     2012      09        30        274              0.208250      13.594818       0.000000       0.292683       0.163000       0.311800   -9999.000000       0.415000
53878     53878     shanxi         113.3703       36.5139           94       173     2012      10        01        275              0.206833      14.253906       5.055708       0.290764       0.123000   -9999.000000       0.077900   -9999.000000
53878     53878     shanxi         113.3703       36.5139           94       173     2012      10        02        276              0.206750      15.129822       0.000000       0.288709       0.129000   -9999.000000       0.084200       0.570000
53878     53878     shanxi         113.3703       36.5139           94       173     2012      10        03        277              0.206167      16.824097       0.000000       0.286799       0.129000       0.018500       0.079300   -9999.000000
53878     53878     shanxi         113.3703       36.5139           94       173     2012      10        04        278              0.222333      17.381439      16.231003       0.283526       0.159500       0.348500       0.088200       1.000000
53878     53878     shanxi         113.3703       36.5139           94       173     2012      10        05        279              0.245500      16.352509       0.000000       0.323963       0.141000       0.221300       0.098900   -9999.000000
53878     53878     shanxi         113.3703       36.5139           94       173     2012      10        06        280              0.234708      14.719513       0.000000       0.318324       0.149000       0.356400   -9999.000000       0.759000
53878     53878     shanxi         113.3703       36.5139           94       173     2012      10        07        281              0.228583      15.092834       0.000000       0.308280       0.142000   -9999.000000       0.070000       0.659000
53878     53878     shanxi         113.3703       36.5139           94       173     2012      10        08        282              0.224167      14.582428       0.121769       0.305014       0.143000   -9999.000000       0.100600       0.728000
53878     53878     shanxi         113.3703       36.5139           94       173     2012      10        09        283              0.218833      15.676636       0.000000       0.302434       0.135000       0.206400       0.094800       0.593000
53878     53878     shanxi         113.3703       36.5139           94       173     2012      10        10        284              0.213292      13.536041       0.000000       0.296690       0.146000   -9999.000000       0.101800   -9999.000000
53878     53878     shanxi         113.3703       36.5139           94       173     2012      10        11        285              0.211000      13.322693       0.000000       0.294442       0.116000       0.181900   -9999.000000       0.514000
53878     53878     shanxi         113.3703       36.5139           94       173     2012      10        12        286              0.208833      14.569122       0.000000       0.292991   -9999.000000   -9999.000000       0.099200       0.651000
53878     53878     shanxi         113.3703       36.5139           94       173     2012      10        13        287              0.206042      14.916779       0.000000       0.291714       0.116000       0.171400       0.088000       0.634000
53878     53878     shanxi         113.3703       36.5139           94       173     2012      10        14        288              0.203875      14.716339       0.081790       0.288642       0.108000       0.043100       0.105700       0.522000
53878     53878     shanxi         113.3703       36.5139           94       173     2012      10        15        289              0.203250      13.552917       0.769206       0.286769       0.138500   -9999.000000       0.085800   -9999.000000
53878     53878     shanxi         113.3703       36.5139           94       173     2012      10        16        290              0.204375      12.586273       0.000000       0.290661       0.122000       0.229700       0.090300       0.669000
53878     53878     shanxi         113.3703       36.5139           94       173     2012      10        17        291              0.201625       9.813049       0.000000       0.289157       0.121000   -9999.000000   -9999.000000       0.579000
53878     53878     shanxi         113.3703       36.5139           94       173     2012      10        18        292              0.202250       9.349487       0.000000       0.285896       0.121000       0.203100       0.078400       0.549000
53878     53878     shanxi         113.3703       36.5139           94       173     2012      10        19        293              0.201792      11.783508       0.000000       0.285438       0.123000       0.119000       0.086000       0.433000
53878     53878     shanxi         113.3703       36.5139           94       173     2012      10        20        294              0.201125      12.883362       0.000000       0.284612       0.116000   -9999.000000       0.085500   -9999.000000
53878     53878     shanxi         113.3703       36.5139           94       173     2012      10        21        295              0.200333      13.760651       5.680945       0.282716       0.125000       0.120100       0.085900       0.659000
53878     53878     shanxi         113.3703       36.5139           94       173     2012      10        22        296              0.202875       9.151459       0.000000       0.306214   -9999.000000       0.442600       0.094100       0.681000
53878     53878     shanxi         113.3703       36.5139           94       173     2012      10        23        297              0.200000       8.209259       0.000000       0.298979   -9999.000000   -9999.000000   -9999.000000       0.625000
53878     53878     shanxi         113.3703       36.5139           94       173     2012      10        24        298              0.201458       8.034576       0.000000       0.295492   -9999.000000       0.178000       0.055400       0.400000
53878     53878     shanxi         113.3703       36.5139           94       173     2012      10        25        299              0.000000      10.110779       0.000000       0.292229       0.112000   -9999.000000       0.079700   -9999.000000
53878     53878     shanxi         113.3703       36.5139           94       173     2012      10        26        300              0.196042      10.563171       0.000000       0.290273       0.121500       0.239100       0.079100       0.460000
53878     53878     shanxi         113.3703       36.5139           94       173     2012      10        27        301              0.198375       8.723328       0.000000       0.291130       0.115000       0.158200       0.086100   -9999.000000
53878     53878     shanxi         113.3703       36.5139           94       173     2012      10        28        302              0.000000      10.642426       0.000000       0.288627       0.107000       0.464800   -9999.000000       0.478000
53878     53878     shanxi         113.3703       36.5139           94       173     2012      10        29        303              0.194792      10.789520       0.000000       0.286363       0.116000       0.132300       0.072800       0.330000
53878     53878     shanxi         113.3703       36.5139           94       173     2012      10        30        304              0.192667      10.190338       0.000000       0.285740       0.111000   -9999.000000       0.061100   -9999.000000
53878     53878     shanxi         113.3703       36.5139           94       173     2012      10        31        305              0.191708       7.361450       0.000000       0.281904       0.124000       0.206500       0.070900       0.430000
53878     53878     shanxi         113.3703       36.5139           94       173     2012      11        01        306              0.190750       7.211487       0.000000       0.280678       0.109000       0.108700       0.064400   -9999.000000
53878     53878     shanxi         113.3703       36.5139           94       173     2012      11        02        307              0.190542       8.049591       2.197663       0.281678       0.107000   -9999.000000       0.073100       0.467000
53878     53878     shanxi         113.3703       36.5139           94       173     2012      11        03        308              0.204875       9.607056       0.000000       0.284050   -9999.000000       0.015700   -9999.000000   -9999.000000
53878     53878     shanxi         113.3703       36.5139           94       173     2012      11        04        309              0.203609       3.253754       0.000000       0.269672   -9999.000000       0.048200       0.058800       0.494000
53878     53878     shanxi         113.3703       36.5139           94       173     2012      11        05        310              0.201708       1.704010       0.000000       0.248052       0.114000   -9999.000000       0.058600       0.446000
53878     53878     shanxi         113.3703       36.5139           94       173     2012      11        06        311              0.200875       3.665375       0.000000       0.265374       0.117000       0.083100       0.059600       0.491000
53878     53878     shanxi         113.3703       36.5139           94       173     2012      11        07        312              0.198375       5.469116       0.071554       0.280504       0.118000   -9999.000000       0.072600       0.446000
53878     53878     shanxi         113.3703       36.5139           94       173     2012      11        08        313              0.197542       4.749481       0.000000       0.280463   -9999.000000       0.077600   -9999.000000   -9999.000000
53878     53878     shanxi         113.3703       36.5139           94       173     2012      11        09        314              0.196167       5.738464       0.631128       0.282193   -9999.000000   -9999.000000       0.071000       0.326000
53878     53878     shanxi         113.3703       36.5139           94       173     2012      11        10        315              0.210625       4.787201       0.394239       0.283856   -9999.000000       0.192000       0.058000       0.463000
53878     53878     shanxi         113.3703       36.5139           94       173     2012      11        11        316              0.208750       2.009705       0.000000       0.255417       0.128000       0.089100       0.060800       0.416000
53878     53878     shanxi         113.3703       36.5139           94       173     2012      11        12        317              0.206667       1.262207       0.000000       0.234247       0.114000   -9999.000000       0.061900       0.474000
53878     53878     shanxi         113.3703       36.5139           94       173     2012      11        13        318              0.000000       2.763885       0.000000       0.254249       0.106000       0.096200       0.063400   -9999.000000
53878     53878     shanxi         113.3703       36.5139           94       173     2012      11        14        319              0.202375       2.843384       0.000000       0.248157   -9999.000000       0.049900   -9999.000000       0.322000
53878     53878     shanxi         113.3703       36.5139           94       173     2012      11        15        320              0.202792       3.152039       0.867453       0.253643   -9999.000000       0.274500       0.053600       0.598000
53878     53878     shanxi         113.3703       36.5139           94       173     2012      11        16        321              0.206167       1.906250       0.000000       0.261042       0.104000       0.141000       0.056800       0.400000
53878     53878     shanxi         113.3703       36.5139           94       173     2012      11        17        322              0.000000       1.687073       0.000000       0.243745       0.108000   -9999.000000       0.061200       0.407000
53878     53878     shanxi         113.3703       36.5139           94       173     2012      11        18        323              0.204792       2.979187       0.000000       0.256809       0.110000   -9999.000000       0.060800   -9999.000000
53878     53878     shanxi         113.3703       36.5139           94       173     2012      11        19        324              0.205333       4.000549       0.000000       0.263057   -9999.000000       0.102300       0.060700       0.241000
53878     53878     shanxi         113.3703       36.5139           94       173     2012      11        20        325              0.205333       3.576935       0.000000       0.271684       0.109000   -9999.000000   -9999.000000       0.538000
53878     53878     shanxi         113.3703       36.5139           94       173     2012      11        21        326              0.204292       3.551727       0.000000       0.279008       0.092000       0.131000       0.041300       0.467000
53878     53878     shanxi         113.3703       36.5139           94       173     2012      11        22        327              0.202042       4.688812       0.000000       0.279490       0.102000   -9999.000000       0.056400       0.271000
53878     53878     shanxi         113.3703       36.5139           94       173     2012      11        23        328              0.195500       2.749268       0.000000       0.260700       0.101000       0.168200       0.049400   -9999.000000
53878     53878     shanxi         113.3703       36.5139           94       173     2012      11        24        329              0.196542       0.541290       0.000000       0.223942       0.090000       0.105800       0.054400       0.262000
53878     53878     shanxi         113.3703       36.5139           94       173     2012      11        25        330              0.198500       1.514496       0.358657       0.241683   -9999.000000   -9999.000000   -9999.000000   -9999.000000
53878     53878     shanxi         113.3703       36.5139           94       173     2012      11        26        331              0.193333       0.766541       0.000000       0.233149       0.093000   -9999.000000   -9999.000000       0.244000
53878     53878     shanxi         113.3703       36.5139           94       173     2012      11        27        332              0.196333       0.025909       0.000000       0.215430       0.106000       0.112000       0.039300       0.175000
53878     53878     shanxi         113.3703       36.5139           94       173     2012      11        28        333              0.195042       1.235321       0.000000       0.233123       0.089000       0.171900       0.052400   -9999.000000
53878     53878     shanxi         113.3703       36.5139           94       173     2012      11        29        334              0.187417      -0.393616       0.000000       0.210721   -9999.000000       0.102700       0.047300       0.178000
53878     53878     shanxi         113.3703       36.5139           94       173     2012      11        30        335              0.179875      -1.072479       0.000000       0.201151   -9999.000000   -9999.000000       0.048600   -9999.000000
53878     53878     shanxi         113.3703       36.5139           94       173     2012      12        01        336              0.174500      -0.625214       0.000000       0.202645   -9999.000000       0.116000   -9999.000000       0.122000
53878     53878     shanxi         113.3703       36.5139           94       173     2012      12        02        337              0.192458      -2.159729       0.000000       0.172893       0.095000       0.083900       0.039700   -9999.000000
53878     53878     shanxi         113.3703       36.5139           94       173     2012      12        03        338              0.182875      -0.399567       0.000000       0.204797       0.089000       0.227500       0.047100       0.097000
53878     53878     shanxi         113.3703       36.5139           94       173     2012      12        04        339              0.186917      -2.094360       0.000000       0.188402       0.093000       0.065000       0.040100       0.287000
53878     53878     shanxi         113.3703       36.5139           94       173     2012      12        05        340              0.178458       0.024933       0.000000       0.213635   -9999.000000   -9999.000000       0.044200       0.082000
53878     53878     shanxi         113.3703       36.5139           94       173     2012      12        06        341              0.185417      -2.885162       0.000000       0.181635   -9999.000000   -9999.000000       0.047100       0.190000
53878     53878     shanxi         113.3703       36.5139           94       173     2012      12        07        342              0.189833      -0.376495       0.000000       0.203788       0.082000       0.020700   -9999.000000   -9999.000000
53878     53878     shanxi         113.3703       36.5139           94       173     2012      12        08        343              0.163042      -1.955536       0.000000       0.190299       0.097000       0.228100       0.023900       0.078000
53878     53878     shanxi         113.3703       36.5139           94       173     2012      12        09        344              0.153042      -3.892944       0.000000       0.171631       0.091000   -9999.000000       0.050300       0.187000
53878     53878     shanxi         113.3703       36.5139           94       173     2012      12        10        345              0.143458      -2.896088       0.000000       0.181233   -9999.000000   -9999.000000       0.035800       0.102000
53878     53878     shanxi         113.3703       36.5139           94       173     2012      12        11        346              0.135708      -2.832092       0.000000       0.184047   -9999.000000       0.155700       0.046000       0.052000
53878     53878     shanxi         113.3703       36.5139           94       173     2012      12        12        347              0.138625      -4.344574       0.000000       0.166704   -9999.000000   -9999.000000   -9999.000000   -9999.000000
53878     53878     shanxi         113.3703       36.5139           94       173     2012      12        13        348              0.140583      -2.759735       0.000000       0.175079   -9999.000000   -9999.000000       0.041900       0.002000
53878     53878     shanxi         113.3703       36.5139           94       173     2012      12        14        349              0.145083      -2.658447       0.000000       0.169626   -9999.000000   -9999.000000       0.032700       0.269000
53878     53878     shanxi         113.3703       36.5139           94       173     2012      12        15        350              0.000000      -1.698639       0.000000       0.187384   -9999.000000       0.205600       0.041900       0.151000
53878     53878     shanxi         113.3703       36.5139           94       173     2012      12        16        351              0.153542      -1.709686       0.000000       0.179527   -9999.000000       0.070900   -9999.000000       0.192000
53878     53878     shanxi         113.3703       36.5139           94       173     2012      12        17        352              0.146208      -1.487274       0.000000       0.186608   -9999.000000       0.117000       0.040600   -9999.000000
53878     53878     shanxi         113.3703       36.5139           94       173     2012      12        18        353              0.143375      -2.346558       0.000000       0.186747   -9999.000000   -9999.000000   -9999.000000       0.038000
53878     53878     shanxi         113.3703       36.5139           94       173     2012      12        19        354              0.143958      -2.635712       0.000000       0.175564   -9999.000000       0.083400       0.032500       0.194000
53878     53878     shanxi         113.3703       36.5139           94       173     2012      12        20        355              0.000000      -2.800018       0.000000       0.170221   -9999.000000       0.116900       0.041200       0.046000
53878     53878     shanxi         113.3703       36.5139           94       173     2012      12        21        356              0.146042      -4.234924       0.000000       0.158648   -9999.000000       0.231700       0.029300       0.083000
53878     53878     shanxi         113.3703       36.5139           94       173     2012      12        22        357              0.140167      -4.027130       0.000000       0.167632   -9999.000000       0.023000       0.037000   -9999.000000
53878     53878     shanxi         113.3703       36.5139           94       173     2012      12        23        358              0.133167      -7.343384       0.000000       0.149319   -9999.000000   -9999.000000   -9999.000000       0.045000
53878     53878     shanxi         113.3703       36.5139           94       173     2012      12        24        359              0.133211     -10.115204       0.000000       0.141926   -9999.000000       0.046000       0.033000   -9999.000000
53878     53878     shanxi         113.3703       36.5139           94       173     2012      12        25        360              0.132417      -7.278717       0.000000       0.143581   -9999.000000       0.012900       0.021900       0.040000
53878     53878     shanxi         113.3703       36.5139           94       173     2012      12        26        361              0.000000      -6.650787       0.000000       0.146432   -9999.000000       0.288000       0.033900       0.053000
53878     53878     shanxi         113.3703       36.5139           94       173     2012      12        27        362              0.133583      -6.134979       0.000000       0.146750   -9999.000000   -9999.000000       0.032200   -9999.000000
53878     53878     shanxi         113.3703       36.5139           94       173     2012      12        28        363              0.136000      -4.805115       0.000000       0.151566   -9999.000000       0.114900       0.034700       0.136000
53878     53878     shanxi         113.3703       36.5139           94       173     2012      12        29        364              0.000000      -3.877716       0.000000       0.161436   -9999.000000       0.135300   -9999.000000   -9999.000000
53878     53878     shanxi         113.3703       36.5139           94       173     2012      12        30        365              0.000000      -9.159363       0.000000       0.145489   -9999.000000       0.166500       0.030600       0.023000
53878     53878     shanxi         113.3703       36.5139           94       173     2012      12        31        366              0.127800      -8.141022       0.000000       0.142522   -9999.000000   -9999.000000       0.028800   -9999.000000
