# Supplementary material for: Research on Fusing Multisatellite Soil Moisture Data Based on Bayesian Model Averaging
Source: Hindawi journal article supplement (doi:10.1155/2018/9310838), 2018-06-25
Supplement: f1 [file 9310838.f1.zip › 2012_sm00-10cm_daily_ZDB_ZHY_53879_366days_allin.txt]

53879     53879     shanxi         112.8692       36.2658           95       171     2012      01        01        001              0.000000   -9999.000000       0.000000   -9999.000000       0.096000   -9999.000000       0.028200   -9999.000000
53879     53879     shanxi         112.8692       36.2658           95       171     2012      01        02        002              0.033292      -3.491638       0.159901       0.160700   -9999.000000       0.144100       0.039300       0.125000
53879     53879     shanxi         112.8692       36.2658           95       171     2012      01        03        003              0.000000      -4.389557       0.000000       0.154644   -9999.000000       0.149900   -9999.000000       0.010000
53879     53879     shanxi         112.8692       36.2658           95       171     2012      01        04        004              0.028292      -7.352386       0.000000       0.138052   -9999.000000       0.064000       0.029000   -9999.000000
53879     53879     shanxi         112.8692       36.2658           95       171     2012      01        05        005              0.026917      -8.098724       0.000000       0.136477   -9999.000000   -9999.000000       0.032600       0.009000
53879     53879     shanxi         112.8692       36.2658           95       171     2012      01        06        006              0.026542      -6.808350       0.000000       0.145560   -9999.000000   -9999.000000       0.036000       0.037000
53879     53879     shanxi         112.8692       36.2658           95       171     2012      01        07        007              0.027875      -5.638824       0.000000       0.149867   -9999.000000       0.171500       0.039900       0.068000
53879     53879     shanxi         112.8692       36.2658           95       171     2012      01        08        008              0.000000      -4.955963       0.000000       0.146105       0.098000       0.102300       0.034500   -9999.000000
53879     53879     shanxi         112.8692       36.2658           95       171     2012      01        09        009              0.029000      -4.299225       0.000000       0.160568       0.098000   -9999.000000   -9999.000000   -9999.000000
53879     53879     shanxi         112.8692       36.2658           95       171     2012      01        10        010              0.029083      -3.346130       0.000000       0.171604   -9999.000000   -9999.000000       0.018800       0.078000
53879     53879     shanxi         112.8692       36.2658           95       171     2012      01        11        011              0.027167      -4.170074       0.000000       0.166688   -9999.000000   -9999.000000       0.026300   -9999.000000
53879     53879     shanxi         112.8692       36.2658           95       171     2012      01        12        012              0.026792      -5.161255       0.000000       0.154672       0.108000       0.112700       0.025900       0.005000
53879     53879     shanxi         112.8692       36.2658           95       171     2012      01        13        013              0.027750      -4.214935       0.000000       0.163360       0.102000   -9999.000000       0.029900   -9999.000000
53879     53879     shanxi         112.8692       36.2658           95       171     2012      01        14        014              0.028625      -3.167786       0.000000       0.171441   -9999.000000   -9999.000000   -9999.000000       0.035000
53879     53879     shanxi         112.8692       36.2658           95       171     2012      01        15        015              0.029792      -3.265930       0.000000       0.168006   -9999.000000       0.041100       0.031600       0.024000
53879     53879     shanxi         112.8692       36.2658           95       171     2012      01        16        016              0.029333      -3.714996       0.000000       0.163069   -9999.000000       0.095000       0.024700   -9999.000000
53879     53879     shanxi         112.8692       36.2658           95       171     2012      01        17        017              0.000000      -4.287567       0.000000       0.153215       0.094000   -9999.000000       0.027700       0.095000
53879     53879     shanxi         112.8692       36.2658           95       171     2012      01        18        018              0.030333      -2.573029       0.000000       0.172710       0.107000   -9999.000000       0.024600   -9999.000000
53879     53879     shanxi         112.8692       36.2658           95       171     2012      01        19        019              0.032000      -2.346649       0.812003       0.177691       0.105000   -9999.000000       0.032200       0.019000
53879     53879     shanxi         112.8692       36.2658           95       171     2012      01        20        020              0.031042      -2.326355       0.000000       0.168037   -9999.000000   -9999.000000   -9999.000000       0.053000
53879     53879     shanxi         112.8692       36.2658           95       171     2012      01        21        021              0.027667      -4.920349       0.000000       0.147307   -9999.000000   -9999.000000       0.020400       0.099000
53879     53879     shanxi         112.8692       36.2658           95       171     2012      01        22        022              0.025250      -6.960419       0.362944       0.139085   -9999.000000       0.054200       0.019000       0.090000
53879     53879     shanxi         112.8692       36.2658           95       171     2012      01        23        023              0.023875      -8.600708       0.544983       0.135280   -9999.000000   -9999.000000       0.025700   -9999.000000
53879     53879     shanxi         112.8692       36.2658           95       171     2012      01        24        024              0.022208      -9.424438       0.000000       0.131501   -9999.000000   -9999.000000   -9999.000000       0.070000
53879     53879     shanxi         112.8692       36.2658           95       171     2012      01        25        025              0.021875      -9.993835       0.000000       0.130308   -9999.000000       0.045500       0.029200       0.048000
53879     53879     shanxi         112.8692       36.2658           95       171     2012      01        26        026              0.024333      -8.449646       0.000000       0.133939   -9999.000000   -9999.000000   -9999.000000       0.076000
53879     53879     shanxi         112.8692       36.2658           95       171     2012      01        27        027              0.024167      -5.043854       0.000000       0.156830       0.100000   -9999.000000       0.020900       0.017000
53879     53879     shanxi         112.8692       36.2658           95       171     2012      01        28        028              0.025500      -4.293762       0.000000       0.163258       0.114000       0.053600       0.029200   -9999.000000
53879     53879     shanxi         112.8692       36.2658           95       171     2012      01        29        029              0.025417      -3.155548       0.000000       0.176651       0.104000   -9999.000000       0.028200       0.017000
53879     53879     shanxi         112.8692       36.2658           95       171     2012      01        30        030              0.027333      -3.605164       0.000000       0.160279       0.108000       0.067300       0.039400       0.019000
53879     53879     shanxi         112.8692       36.2658           95       171     2012      01        31        031              0.029708      -2.795624       0.000000       0.178973   -9999.000000   -9999.000000   -9999.000000       0.112000
53879     53879     shanxi         112.8692       36.2658           95       171     2012      02        01        032              0.027083      -1.037201       0.000000       0.196409   -9999.000000   -9999.000000       0.034400       0.050000
53879     53879     shanxi         112.8692       36.2658           95       171     2012      02        02        033              0.025500      -4.328247       0.000000       0.165077       0.099000   -9999.000000       0.028400   -9999.000000
53879     53879     shanxi         112.8692       36.2658           95       171     2012      02        03        034              0.026625      -4.778564       0.000000       0.157473       0.105000   -9999.000000       0.032900       0.028000
53879     53879     shanxi         112.8692       36.2658           95       171     2012      02        04        035              0.027667      -2.541595       0.000000       0.177877   -9999.000000       0.129700       0.030900       0.015000
53879     53879     shanxi         112.8692       36.2658           95       171     2012      02        05        036              0.029667      -2.295258       0.000000       0.174255   -9999.000000       0.040100       0.041900       0.067000
53879     53879     shanxi         112.8692       36.2658           95       171     2012      02        06        037              0.027083      -0.844879       0.000000       0.197807   -9999.000000   -9999.000000   -9999.000000       0.047000
53879     53879     shanxi         112.8692       36.2658           95       171     2012      02        07        038              0.023792      -3.830841       1.125357       0.179802       0.095000       0.077900       0.029200   -9999.000000
53879     53879     shanxi         112.8692       36.2658           95       171     2012      02        08        039              0.021708      -6.346405       0.000000       0.148023   -9999.000000       0.132400       0.034700       0.067000
53879     53879     shanxi         112.8692       36.2658           95       171     2012      02        09        040              0.022417      -7.939636       0.000000       0.133963   -9999.000000       0.093400       0.031200   -9999.000000
53879     53879     shanxi         112.8692       36.2658           95       171     2012      02        10        041              0.023958      -5.837006       0.000000       0.141362   -9999.000000   -9999.000000       0.038900       0.013000
53879     53879     shanxi         112.8692       36.2658           95       171     2012      02        11        042              0.026208      -4.759247       0.000000       0.166346   -9999.000000   -9999.000000       0.040500   -9999.000000
53879     53879     shanxi         112.8692       36.2658           95       171     2012      02        12        043              0.026833      -1.243042       0.000000       0.187916   -9999.000000   -9999.000000   -9999.000000   -9999.000000
53879     53879     shanxi         112.8692       36.2658           95       171     2012      02        13        044              0.026042      -3.065063       0.000000       0.171595   -9999.000000       0.192300   -9999.000000       0.076000
53879     53879     shanxi         112.8692       36.2658           95       171     2012      02        14        045              0.029583      -2.731934       0.000000       0.172370       0.094000   -9999.000000       0.035900   -9999.000000
53879     53879     shanxi         112.8692       36.2658           95       171     2012      02        15        046              0.030917      -0.280273       0.000000       0.201670       0.097000   -9999.000000       0.035300       0.048000
53879     53879     shanxi         112.8692       36.2658           95       171     2012      02        16        047              0.029958      -1.079285       0.000000       0.198198   -9999.000000   -9999.000000       0.036700   -9999.000000
53879     53879     shanxi         112.8692       36.2658           95       171     2012      02        17        048              0.027250      -2.591064       0.000000       0.186009       0.093000       0.211400   -9999.000000       0.006000
53879     53879     shanxi         112.8692       36.2658           95       171     2012      02        18        049              0.026833      -4.125397       0.000000       0.173660       0.098000       0.031400       0.033500       0.049000
53879     53879     shanxi         112.8692       36.2658           95       171     2012      02        19        050              0.029083      -4.441528       0.000000       0.172556       0.093000   -9999.000000       0.030900       0.265000
53879     53879     shanxi         112.8692       36.2658           95       171     2012      02        20        051              0.034833      -1.632751       0.000000       0.187976       0.098000   -9999.000000       0.035600       0.181000
53879     53879     shanxi         112.8692       36.2658           95       171     2012      02        21        052              0.039375       1.005127       0.000000       0.212798   -9999.000000   -9999.000000   -9999.000000   -9999.000000
53879     53879     shanxi         112.8692       36.2658           95       171     2012      02        22        053              0.046417       1.283112       0.000000       0.215397   -9999.000000   -9999.000000       0.049800       0.196000
53879     53879     shanxi         112.8692       36.2658           95       171     2012      02        23        054              0.051583       3.128326       0.000000       0.233913       0.076000   -9999.000000   -9999.000000       0.201000
53879     53879     shanxi         112.8692       36.2658           95       171     2012      02        24        055              0.055917       1.048645       0.000000       0.216470       0.088000   -9999.000000       0.031200       0.261000
53879     53879     shanxi         112.8692       36.2658           95       171     2012      02        25        056              0.052250       1.296387       0.000000       0.224548   -9999.000000   -9999.000000       0.035300       0.025000
53879     53879     shanxi         112.8692       36.2658           95       171     2012      02        26        057              0.047833      -0.928436       0.000000       0.189476   -9999.000000       0.216000       0.035400   -9999.000000
53879     53879     shanxi         112.8692       36.2658           95       171     2012      02        27        058              0.049250      -0.891541       0.000000       0.197369   -9999.000000   -9999.000000   -9999.000000       0.118000
53879     53879     shanxi         112.8692       36.2658           95       171     2012      02        28        059              0.053917       0.461609       0.000000       0.209347       0.080000   -9999.000000   -9999.000000       0.283000
53879     53879     shanxi         112.8692       36.2658           95       171     2012      02        29        060              0.000000   -9999.000000       0.000000   -9999.000000       0.090000   -9999.000000   -9999.000000   -9999.000000
53879     53879     shanxi         112.8692       36.2658           95       171     2012      03        01        061              0.064333       1.332642       0.575276       0.215761   -9999.000000   -9999.000000       0.019400       0.300000
53879     53879     shanxi         112.8692       36.2658           95       171     2012      03        02        062              0.065125       0.878448       0.083961       0.221215   -9999.000000   -9999.000000       0.033800   -9999.000000
53879     53879     shanxi         112.8692       36.2658           95       171     2012      03        03        063              0.061958       0.611725       0.000000       0.217315   -9999.000000   -9999.000000       0.038200       0.135000
53879     53879     shanxi         112.8692       36.2658           95       171     2012      03        04        064              0.065667      -0.139587       0.000000       0.201495       0.107000       0.075400       0.048100       0.326000
53879     53879     shanxi         112.8692       36.2658           95       171     2012      03        05        065              0.070667       0.942719       0.000000       0.217109       0.120000   -9999.000000   -9999.000000       0.204000
53879     53879     shanxi         112.8692       36.2658           95       171     2012      03        06        066              0.064750       1.286316       0.000000       0.220245       0.114000   -9999.000000       0.038900       0.201000
53879     53879     shanxi         112.8692       36.2658           95       171     2012      03        07        067              0.000000       0.816833       0.000000       0.212502       0.111000       0.035100       0.036000   -9999.000000
53879     53879     shanxi         112.8692       36.2658           95       171     2012      03        08        068              0.093875       3.725311       0.000000       0.235770   -9999.000000   -9999.000000       0.042300       0.256000
53879     53879     shanxi         112.8692       36.2658           95       171     2012      03        09        069              0.093417       2.575439       0.000000       0.228940   -9999.000000   -9999.000000       0.046300   -9999.000000
53879     53879     shanxi         112.8692       36.2658           95       171     2012      03        10        070              0.090917       3.279114       0.000000       0.233312       0.100000   -9999.000000       0.053600       0.261000
53879     53879     shanxi         112.8692       36.2658           95       171     2012      03        11        071              0.084958       4.348328       0.000000       0.233548       0.102000       0.182300   -9999.000000   -9999.000000
53879     53879     shanxi         112.8692       36.2658           95       171     2012      03        12        072              0.083167       2.730377       0.000000       0.218150       0.100000   -9999.000000       0.032300       0.358000
53879     53879     shanxi         112.8692       36.2658           95       171     2012      03        13        073              0.085667       2.883392       0.000000       0.222133   -9999.000000   -9999.000000       0.043000       0.395000
53879     53879     shanxi         112.8692       36.2658           95       171     2012      03        14        074              0.088739       5.489899       0.000000       0.233677   -9999.000000   -9999.000000   -9999.000000   -9999.000000
53879     53879     shanxi         112.8692       36.2658           95       171     2012      03        15        075              0.089250       5.617828       0.000000       0.237276       0.111000       0.121500       0.049900       0.301000
53879     53879     shanxi         112.8692       36.2658           95       171     2012      03        16        076              0.091875       2.469818       0.000000       0.238662       0.107000   -9999.000000   -9999.000000   -9999.000000
53879     53879     shanxi         112.8692       36.2658           95       171     2012      03        17        077              0.094875       6.437256       0.000000       0.244190       0.097000       0.119300       0.045900       0.315000
53879     53879     shanxi         112.8692       36.2658           95       171     2012      03        18        078              0.094500       8.761505       0.163581       0.251312   -9999.000000   -9999.000000       0.034600       0.303000
53879     53879     shanxi         112.8692       36.2658           95       171     2012      03        19        079              0.093000       5.633759       0.737645       0.235407   -9999.000000   -9999.000000       0.048100       0.245000
53879     53879     shanxi         112.8692       36.2658           95       171     2012      03        20        080              0.100542       1.193787       0.848312       0.224494       0.101000   -9999.000000       0.054800       0.358000
53879     53879     shanxi         112.8692       36.2658           95       171     2012      03        21        081              0.101458       4.010925       0.840299       0.248296   -9999.000000   -9999.000000       0.061500   -9999.000000
53879     53879     shanxi         112.8692       36.2658           95       171     2012      03        22        082              0.117000       1.481293       3.264993       0.237815   -9999.000000       0.077800   -9999.000000       0.530000
53879     53879     shanxi         112.8692       36.2658           95       171     2012      03        23        083              0.119292       2.307861       0.000000       0.263537   -9999.000000   -9999.000000       0.044700       0.367000
53879     53879     shanxi         112.8692       36.2658           95       171     2012      03        24        084              0.112208       4.530518       0.000000       0.250842   -9999.000000       0.149300   -9999.000000       0.479000
53879     53879     shanxi         112.8692       36.2658           95       171     2012      03        25        085              0.000000       6.969269       0.000000       0.249179       0.103000       0.103200       0.048500       0.313000
53879     53879     shanxi         112.8692       36.2658           95       171     2012      03        26        086              0.107042       8.397430       0.000000       0.251374       0.098000   -9999.000000       0.052700   -9999.000000
53879     53879     shanxi         112.8692       36.2658           95       171     2012      03        27        087              0.105792       9.530640       0.000000       0.247918       0.091000   -9999.000000       0.060400       0.543000
53879     53879     shanxi         112.8692       36.2658           95       171     2012      03        28        088              0.103500      10.551819       0.072477       0.245048       0.101000   -9999.000000   -9999.000000       0.469000
53879     53879     shanxi         112.8692       36.2658           95       171     2012      03        29        089              0.102958      11.322388       0.000000       0.245442       0.098000   -9999.000000       0.048100       0.406000
53879     53879     shanxi         112.8692       36.2658           95       171     2012      03        30        090              0.098458      11.467163       0.459660       0.243095   -9999.000000       0.136300       0.047800       0.238000
53879     53879     shanxi         112.8692       36.2658           95       171     2012      03        31        091              0.097917       7.632965       0.000000       0.239555       0.082000   -9999.000000       0.042800   -9999.000000
53879     53879     shanxi         112.8692       36.2658           95       171     2012      04        01        092              0.096750       9.831329       0.000000       0.231136       0.098000       0.257500       0.055300       0.485000
53879     53879     shanxi         112.8692       36.2658           95       171     2012      04        02        093              0.091625      12.674194       0.000000       0.228418       0.101000       0.350700   -9999.000000       0.272000
53879     53879     shanxi         112.8692       36.2658           95       171     2012      04        03        094              0.092917       6.285553       0.138924       0.224073   -9999.000000   -9999.000000       0.056700       0.243000
53879     53879     shanxi         112.8692       36.2658           95       171     2012      04        04        095              0.093208       9.047394       0.000000       0.226007   -9999.000000   -9999.000000       0.039300       0.217000
53879     53879     shanxi         112.8692       36.2658           95       171     2012      04        05        096              0.092083      11.767303       0.000000       0.220420       0.094000   -9999.000000       0.050200   -9999.000000
53879     53879     shanxi         112.8692       36.2658           95       171     2012      04        06        097              0.090708      12.350494       0.000000       0.213657       0.096000   -9999.000000       0.042800       0.375000
53879     53879     shanxi         112.8692       36.2658           95       171     2012      04        07        098              0.089542      12.817444       0.000000       0.208597       0.091000       0.251500       0.054900   -9999.000000
53879     53879     shanxi         112.8692       36.2658           95       171     2012      04        08        099              0.088458      14.185547       0.000000       0.204048       0.102000   -9999.000000   -9999.000000       0.198000
53879     53879     shanxi         112.8692       36.2658           95       171     2012      04        09        100              0.086417      15.866394       3.977534       0.198710       0.137000       0.074900       0.059400   -9999.000000
53879     53879     shanxi         112.8692       36.2658           95       171     2012      04        10        101              0.093625      14.012909       0.058182       0.213551       0.111500   -9999.000000       0.061200       0.683000
53879     53879     shanxi         112.8692       36.2658           95       171     2012      04        11        102              0.099167      14.149567       1.874415       0.219568       0.102000   -9999.000000       0.077900       0.349000
53879     53879     shanxi         112.8692       36.2658           95       171     2012      04        12        103              0.109333      14.867767       0.000000       0.222926       0.117000   -9999.000000       0.071400   -9999.000000
53879     53879     shanxi         112.8692       36.2658           95       171     2012      04        13        104              0.106125      11.531738       0.000000       0.230439       0.101000   -9999.000000       0.058400       0.336000
53879     53879     shanxi         112.8692       36.2658           95       171     2012      04        14        105              0.101750      14.809204       0.000000       0.217044       0.113000   -9999.000000   -9999.000000   -9999.000000
53879     53879     shanxi         112.8692       36.2658           95       171     2012      04        15        106              0.101292      14.051758       0.000000       0.210871       0.097000   -9999.000000       0.039800       0.346000
53879     53879     shanxi         112.8692       36.2658           95       171     2012      04        16        107              0.098958      16.132538       0.000000       0.202856       0.102000   -9999.000000       0.061600       0.367000
53879     53879     shanxi         112.8692       36.2658           95       171     2012      04        17        108              0.096750      15.848755       0.073290       0.198040       0.093000       0.091500       0.054800       0.492000
53879     53879     shanxi         112.8692       36.2658           95       171     2012      04        18        109              0.095917      16.191406       0.546240       0.197273       0.092000   -9999.000000   -9999.000000       0.247000
53879     53879     shanxi         112.8692       36.2658           95       171     2012      04        19        110              0.095167      16.802460       1.974644       0.198630       0.103000   -9999.000000   -9999.000000   -9999.000000
53879     53879     shanxi         112.8692       36.2658           95       171     2012      04        20        111              0.091583      17.671692       7.505210       0.212318   -9999.000000       0.325600       0.070800       0.249000
53879     53879     shanxi         112.8692       36.2658           95       171     2012      04        21        112              0.096750      14.322815       0.914440       0.256383       0.106500   -9999.000000       0.053200       0.524000
53879     53879     shanxi         112.8692       36.2658           95       171     2012      04        22        113              0.097583      15.829865       2.276416       0.264135       0.095000   -9999.000000       0.061000       0.367000
53879     53879     shanxi         112.8692       36.2658           95       171     2012      04        23        114              0.098708      18.949646       1.404736       0.243822       0.098000   -9999.000000       0.062300       0.304000
53879     53879     shanxi         112.8692       36.2658           95       171     2012      04        24        115              0.105625      21.014801       0.928516       0.237995   -9999.000000   -9999.000000       0.101500   -9999.000000
53879     53879     shanxi         112.8692       36.2658           95       171     2012      04        25        116              0.000000      12.016418       0.000000       0.251871   -9999.000000   -9999.000000   -9999.000000       0.797000
53879     53879     shanxi         112.8692       36.2658           95       171     2012      04        26        117              0.101833      12.684601       0.000000       0.234647       0.102000   -9999.000000       0.062900       0.365000
53879     53879     shanxi         112.8692       36.2658           95       171     2012      04        27        118              0.099750      17.205017       0.000000       0.220645       0.099500       0.211600   -9999.000000       0.362000
53879     53879     shanxi         112.8692       36.2658           95       171     2012      04        28        119              0.096292      18.338287       0.000000       0.207494       0.090000   -9999.000000       0.063800       0.175000
53879     53879     shanxi         112.8692       36.2658           95       171     2012      04        29        120              0.094625      19.325378       0.000000       0.198036   -9999.000000       0.125200       0.068900   -9999.000000
53879     53879     shanxi         112.8692       36.2658           95       171     2012      04        30        121              0.093042      20.049652       0.650928       0.192959       0.108000       0.176500   -9999.000000       0.336000
53879     53879     shanxi         112.8692       36.2658           95       171     2012      05        01        122              0.091583      20.326538       0.000000       0.196673       0.128000   -9999.000000   -9999.000000       0.373000
53879     53879     shanxi         112.8692       36.2658           95       171     2012      05        02        123              0.090833      19.706970       1.129923       0.196495       0.134500   -9999.000000       0.051900       0.224000
53879     53879     shanxi         112.8692       36.2658           95       171     2012      05        03        124              0.089375      21.161926       0.000000       0.189996       0.111000   -9999.000000       0.067100       0.154000
53879     53879     shanxi         112.8692       36.2658           95       171     2012      05        04        125              0.087542      21.452911       0.000000       0.182784       0.113000   -9999.000000       0.055500   -9999.000000
53879     53879     shanxi         112.8692       36.2658           95       171     2012      05        05        126              0.085208      22.998871       0.000000       0.176818       0.138000   -9999.000000       0.066200       0.335000
53879     53879     shanxi         112.8692       36.2658           95       171     2012      05        06        127              0.084083      24.101471       0.363857       0.173917       0.117000   -9999.000000   -9999.000000   -9999.000000
53879     53879     shanxi         112.8692       36.2658           95       171     2012      05        07        128              0.081167      25.005096       0.110553       0.173292   -9999.000000   -9999.000000       0.067400       0.381000
53879     53879     shanxi         112.8692       36.2658           95       171     2012      05        08        129              0.078458      23.451416       1.152599       0.175149       0.115000   -9999.000000       0.076200   -9999.000000
53879     53879     shanxi         112.8692       36.2658           95       171     2012      05        09        130              0.076625      23.024200       0.000000       0.187591       0.121000   -9999.000000       0.073800       0.217000
53879     53879     shanxi         112.8692       36.2658           95       171     2012      05        10        131              0.076333      21.958374       0.000000       0.185298       0.129000   -9999.000000       0.061900       0.406000
53879     53879     shanxi         112.8692       36.2658           95       171     2012      05        11        132              0.072875      23.998352       2.749444       0.177316       0.212000   -9999.000000       0.072800   -9999.000000
53879     53879     shanxi         112.8692       36.2658           95       171     2012      05        12        133              0.069667      20.805450       0.064822       0.200867       0.152500   -9999.000000   -9999.000000       0.169000
53879     53879     shanxi         112.8692       36.2658           95       171     2012      05        13        134              0.071250      15.775360       0.102283       0.207271       0.146000       0.150000       0.057000   -9999.000000
53879     53879     shanxi         112.8692       36.2658           95       171     2012      05        14        135              0.069917      18.310028       0.000000       0.192619       0.135000   -9999.000000       0.078300       0.153000
53879     53879     shanxi         112.8692       36.2658           95       171     2012      05        15        136              0.067833      18.114136       0.149219       0.180980       0.162000       0.094700       0.073500       0.271000
53879     53879     shanxi         112.8692       36.2658           95       171     2012      05        16        137              0.065667      19.173035       0.482507       0.174548       0.154000   -9999.000000       0.079600       0.305000
53879     53879     shanxi         112.8692       36.2658           95       171     2012      05        17        138              0.064708      19.946930       0.000000       0.173731       0.136000   -9999.000000       0.078500       0.258000
53879     53879     shanxi         112.8692       36.2658           95       171     2012      05        18        139              0.062000      22.365814       2.129891       0.169299       0.151500   -9999.000000   -9999.000000   -9999.000000
53879     53879     shanxi         112.8692       36.2658           95       171     2012      05        19        140              0.060417      23.414215       0.052344       0.166832       0.098000   -9999.000000       0.057200       0.283000
53879     53879     shanxi         112.8692       36.2658           95       171     2012      05        20        141              0.057583      23.994873       0.521922       0.166701   -9999.000000   -9999.000000       0.081600       0.274000
53879     53879     shanxi         112.8692       36.2658           95       171     2012      05        21        142              0.054167      24.521240       0.807369       0.168317       0.228000   -9999.000000       0.074400       0.216000
53879     53879     shanxi         112.8692       36.2658           95       171     2012      05        22        143              0.054000      18.234100       0.168677       0.177708       0.190000       0.107200       0.085200       0.194000
53879     53879     shanxi         112.8692       36.2658           95       171     2012      05        23        144              0.055667      19.563995      10.738593       0.183582   -9999.000000   -9999.000000   -9999.000000   -9999.000000
53879     53879     shanxi         112.8692       36.2658           95       171     2012      05        24        145              0.062708      19.840759       1.441541       0.243428       0.194000   -9999.000000       0.090000       0.822000
53879     53879     shanxi         112.8692       36.2658           95       171     2012      05        25        146              0.000000      18.511383       0.000000       0.258797       0.161000   -9999.000000       0.078400       0.343000
53879     53879     shanxi         112.8692       36.2658           95       171     2012      05        26        147              0.060833      20.263153       1.406137       0.232037       0.191000       0.202900       0.089100       0.335000
53879     53879     shanxi         112.8692       36.2658           95       171     2012      05        27        148              0.059792      19.792419       0.000000       0.227440       0.188000   -9999.000000       0.079400       0.253000
53879     53879     shanxi         112.8692       36.2658           95       171     2012      05        28        149              0.059917      22.210541       2.019002       0.209278       0.144000       0.073600       0.079100   -9999.000000
53879     53879     shanxi         112.8692       36.2658           95       171     2012      05        29        150              0.057583      22.533539       0.387892       0.202032       0.199000   -9999.000000   -9999.000000       0.360000
53879     53879     shanxi         112.8692       36.2658           95       171     2012      05        30        151              0.058500      19.545013       0.000000       0.215831       0.152000   -9999.000000       0.068700   -9999.000000
53879     53879     shanxi         112.8692       36.2658           95       171     2012      05        31        152              0.056417      22.231049       0.000000       0.196195       0.180000       0.184600   -9999.000000   -9999.000000
53879     53879     shanxi         112.8692       36.2658           95       171     2012      06        01        153              0.074292      21.413269       9.411707       0.188025       0.257000   -9999.000000       0.079900       0.683000
53879     53879     shanxi         112.8692       36.2658           95       171     2012      06        02        154              0.100083      22.365601       4.651532       0.232935       0.171500       0.255500       0.098000   -9999.000000
53879     53879     shanxi         112.8692       36.2658           95       171     2012      06        03        155              0.092917      19.827515       0.000000       0.269969       0.189500   -9999.000000   -9999.000000       0.466000
53879     53879     shanxi         112.8692       36.2658           95       171     2012      06        04        156              0.088708      20.978699       0.000000       0.247039       0.142000   -9999.000000       0.102900   -9999.000000
53879     53879     shanxi         112.8692       36.2658           95       171     2012      06        05        157              0.082375      23.128632       2.015244       0.223168   -9999.000000       0.155500       0.088800       0.318000
53879     53879     shanxi         112.8692       36.2658           95       171     2012      06        06        158              0.073125      22.897064       0.913566       0.221282       0.211000   -9999.000000       0.106500   -9999.000000
53879     53879     shanxi         112.8692       36.2658           95       171     2012      06        07        159              0.074333      17.828888       0.274408       0.234588       0.175500       0.033800       0.098400       0.391000
53879     53879     shanxi         112.8692       36.2658           95       171     2012      06        08        160              0.070667      21.963379       0.323228       0.220065       0.172500       0.115400       0.104100       0.322000
53879     53879     shanxi         112.8692       36.2658           95       171     2012      06        09        161              0.067292      22.424316       0.270028       0.208447       0.158000   -9999.000000   -9999.000000   -9999.000000
53879     53879     shanxi         112.8692       36.2658           95       171     2012      06        10        162              0.059958      24.689301       0.432894       0.192866       0.128000       0.144700       0.095500       0.381000
53879     53879     shanxi         112.8692       36.2658           95       171     2012      06        11        163              0.000000      23.938019       0.000000       0.183003       0.193000   -9999.000000       0.096400   -9999.000000
53879     53879     shanxi         112.8692       36.2658           95       171     2012      06        12        164              0.048750      23.558197       0.920563       0.174429       0.163000   -9999.000000       0.107700       0.191000
53879     53879     shanxi         112.8692       36.2658           95       171     2012      06        13        165              0.044417      25.044769       0.032155       0.169283       0.182000   -9999.000000       0.096900       0.384000
53879     53879     shanxi         112.8692       36.2658           95       171     2012      06        14        166              0.039833      26.754181       0.000000       0.166029       0.167000   -9999.000000       0.104700       0.479000
53879     53879     shanxi         112.8692       36.2658           95       171     2012      06        15        167              0.035792      24.680725       0.000000       0.164083       0.178000       0.124500   -9999.000000       0.325000
53879     53879     shanxi         112.8692       36.2658           95       171     2012      06        16        168              0.032708      24.876160       0.000000       0.162651       0.170000   -9999.000000       0.085900   -9999.000000
53879     53879     shanxi         112.8692       36.2658           95       171     2012      06        17        169              0.030000      26.018890       0.000000       0.161536       0.174000   -9999.000000       0.105600       0.334000
53879     53879     shanxi         112.8692       36.2658           95       171     2012      06        18        170              0.027208      27.191864       0.000000       0.160316       0.168000       0.134000       0.087300       0.488000
53879     53879     shanxi         112.8692       36.2658           95       171     2012      06        19        171              0.024167      28.389740       1.120473       0.159102       0.160000   -9999.000000       0.092800       0.443000
53879     53879     shanxi         112.8692       36.2658           95       171     2012      06        20        172              0.021042      28.092682       0.000000       0.167696       0.139000       0.116000   -9999.000000       0.315000
53879     53879     shanxi         112.8692       36.2658           95       171     2012      06        21        173              0.018667      26.161346       2.487716       0.166734       0.218000   -9999.000000       0.106700   -9999.000000
53879     53879     shanxi         112.8692       36.2658           95       171     2012      06        22        174              0.018333      24.479004       0.190062       0.188578       0.185000   -9999.000000       0.080600       0.470000
53879     53879     shanxi         112.8692       36.2658           95       171     2012      06        23        175              0.015792      25.775146       2.762683       0.183118       0.200000   -9999.000000       0.101400       0.609000
53879     53879     shanxi         112.8692       36.2658           95       171     2012      06        24        176              0.040875      23.435516      14.455472       0.197811       0.251500   -9999.000000       0.102300       1.000000
53879     53879     shanxi         112.8692       36.2658           95       171     2012      06        25        177              0.060875      22.078552       1.440041       0.295543       0.226000       0.123000       0.150000       0.950000
53879     53879     shanxi         112.8692       36.2658           95       171     2012      06        26        178              0.064542      22.164642       0.420377       0.270172       0.262000       0.144500   -9999.000000   -9999.000000
53879     53879     shanxi         112.8692       36.2658           95       171     2012      06        27        179              0.057250      22.582336       0.279213       0.254000       0.244000   -9999.000000       0.124700       0.702000
53879     53879     shanxi         112.8692       36.2658           95       171     2012      06        28        180              0.063917      21.113678      22.412085       0.243903       0.191000       0.174500       0.157000       0.707000
53879     53879     shanxi         112.8692       36.2658           95       171     2012      06        29        181              0.116458      21.305389       8.977983       0.278239       0.261000   -9999.000000       0.157700       1.000000
53879     53879     shanxi         112.8692       36.2658           95       171     2012      06        30        182              0.106125      20.577545       0.000000       0.328097       0.189000   -9999.000000       0.130000   -9999.000000
53879     53879     shanxi         112.8692       36.2658           95       171     2012      07        01        183              0.097042      23.936279       0.000000       0.290933       0.190000       0.207600       0.130300   -9999.000000
53879     53879     shanxi         112.8692       36.2658           95       171     2012      07        02        184              0.086625      25.089996       0.000000       0.272245       0.260000   -9999.000000   -9999.000000       0.588000
53879     53879     shanxi         112.8692       36.2658           95       171     2012      07        03        185              0.075958      25.926575       0.000000       0.258505       0.197500       0.052900       0.104900   -9999.000000
53879     53879     shanxi         112.8692       36.2658           95       171     2012      07        04        186              0.068583      25.945343       1.016920       0.246451       0.243000   -9999.000000       0.130700       0.723000
53879     53879     shanxi         112.8692       36.2658           95       171     2012      07        05        187              0.063625      22.653656       0.000000       0.252326       0.180000       0.146600       0.113000   -9999.000000
53879     53879     shanxi         112.8692       36.2658           95       171     2012      07        06        188              0.055375      25.261780       0.244514       0.237177   -9999.000000       0.156700       0.123700       0.370000
53879     53879     shanxi         112.8692       36.2658           95       171     2012      07        07        189              0.051000      25.241211       1.906872       0.225306   -9999.000000   -9999.000000   -9999.000000       0.702000
53879     53879     shanxi         112.8692       36.2658           95       171     2012      07        08        190              0.081583      22.929840      52.832161       0.242505   -9999.000000       0.107300       0.155400   -9999.000000
53879     53879     shanxi         112.8692       36.2658           95       171     2012      07        09        191              0.135417      23.841461      28.670229       0.311149       0.304500   -9999.000000       0.147100       1.000000
53879     53879     shanxi         112.8692       36.2658           95       171     2012      07        10        192              0.123667      22.455261       0.507493       0.367969       0.254000   -9999.000000       0.169900   -9999.000000
53879     53879     shanxi         112.8692       36.2658           95       171     2012      07        11        193              0.116708      25.244965       0.393637       0.331778       0.208000       0.177000       0.153500       0.977000
53879     53879     shanxi         112.8692       36.2658           95       171     2012      07        12        194              0.108042      25.693695       0.195112       0.317012       0.287000   -9999.000000       0.154000       0.735000
53879     53879     shanxi         112.8692       36.2658           95       171     2012      07        13        195              0.120500      25.680969      14.239265       0.305527       0.259000       0.069000   -9999.000000       0.788000
53879     53879     shanxi         112.8692       36.2658           95       171     2012      07        14        196              0.126417      22.417358       1.717839       0.334153       0.236500       0.205200       0.144100       0.830000
53879     53879     shanxi         112.8692       36.2658           95       171     2012      07        15        197              0.119083      21.183624       0.246479       0.324342       0.251500   -9999.000000       0.161300   -9999.000000
53879     53879     shanxi         112.8692       36.2658           95       171     2012      07        16        198              0.114625      21.778320       0.000000       0.314208       0.221000       0.158000       0.167500       0.765000
53879     53879     shanxi         112.8692       36.2658           95       171     2012      07        17        199              0.194083      22.449554       0.000000       0.306856       0.202000   -9999.000000       0.184500       0.692000
53879     53879     shanxi         112.8692       36.2658           95       171     2012      07        18        200              0.248167      22.876221       0.000000       0.298878       0.223000   -9999.000000       0.168700       0.688000
53879     53879     shanxi         112.8692       36.2658           95       171     2012      07        19        201              0.242083      23.078339       0.000000       0.293405       0.228000       0.323200   -9999.000000       0.644000
53879     53879     shanxi         112.8692       36.2658           95       171     2012      07        20        202              0.236000      23.988922       0.421993       0.288338       0.195500       0.153100       0.149000   -9999.000000
53879     53879     shanxi         112.8692       36.2658           95       171     2012      07        21        203              0.231348      25.066162       5.415231       0.285034       0.242000       0.115200       0.183300       0.668000
53879     53879     shanxi         112.8692       36.2658           95       171     2012      07        22        204              0.225917      24.053589       0.000000       0.301401       0.232000   -9999.000000       0.154600       0.705000
53879     53879     shanxi         112.8692       36.2658           95       171     2012      07        23        205              0.217458      23.231720      11.317105       0.291089       0.255000       0.285500       0.146900       0.643000
53879     53879     shanxi         112.8692       36.2658           95       171     2012      07        24        206              0.211417      23.131470       0.280142       0.305029       0.261000       0.103100   -9999.000000       0.579000
53879     53879     shanxi         112.8692       36.2658           95       171     2012      07        25        207              0.207250      24.992889       1.019786       0.291402       0.201000   -9999.000000       0.141900   -9999.000000
53879     53879     shanxi         112.8692       36.2658           95       171     2012      07        26        208              0.203292      26.001984       0.232260       0.287910       0.232500       0.041000       0.130200       0.785000
53879     53879     shanxi         112.8692       36.2658           95       171     2012      07        27        209              0.198375      26.470764       3.878055       0.280573       0.222000   -9999.000000       0.148500       0.657000
53879     53879     shanxi         112.8692       36.2658           95       171     2012      07        28        210              0.193000      26.840912       0.000000       0.269880   -9999.000000   -9999.000000       0.128400       0.670000
53879     53879     shanxi         112.8692       36.2658           95       171     2012      07        29        211              0.188708      27.786530       1.260789       0.261485       0.239000       0.280300       0.139300       0.687000
53879     53879     shanxi         112.8692       36.2658           95       171     2012      07        30        212              0.206958      27.209137      41.332447       0.261056       0.216000   -9999.000000   -9999.000000   -9999.000000
53879     53879     shanxi         112.8692       36.2658           95       171     2012      07        31        213              0.266167      26.207764      16.413912       0.318727       0.308000       0.288700       0.132700       0.838000
53879     53879     shanxi         112.8692       36.2658           95       171     2012      08        01        214              0.262958      23.223694       8.483136       0.357102       0.267000   -9999.000000       0.143500   -9999.000000
53879     53879     shanxi         112.8692       36.2658           95       171     2012      08        02        215              0.277875      24.022034       7.022226       0.334961       0.258000       0.182500       0.141500       0.843000
53879     53879     shanxi         112.8692       36.2658           95       171     2012      08        03        216              0.267625      24.326202       2.325807       0.337001       0.288000       0.123200       0.145300   -9999.000000
53879     53879     shanxi         112.8692       36.2658           95       171     2012      08        04        217              0.273250      24.193848       2.877215       0.329593       0.275000   -9999.000000       0.136400       0.876000
53879     53879     shanxi         112.8692       36.2658           95       171     2012      08        05        218              0.275000      24.653717       0.577982       0.318363       0.257500       0.200400   -9999.000000       0.820000
53879     53879     shanxi         112.8692       36.2658           95       171     2012      08        06        219              0.277750      23.649811       0.000000       0.315848       0.260000       0.090400       0.143200   -9999.000000
53879     53879     shanxi         112.8692       36.2658           95       171     2012      08        07        220              0.273625      24.284851       0.000000       0.308644       0.215000       0.282800   -9999.000000       0.695000
53879     53879     shanxi         112.8692       36.2658           95       171     2012      08        08        221              0.267917      24.731506       0.070901       0.300980   -9999.000000       0.152700       0.158100   -9999.000000
53879     53879     shanxi         112.8692       36.2658           95       171     2012      08        09        222              0.266625      25.966492       5.016331       0.295825       0.255000   -9999.000000       0.175300       0.903000
53879     53879     shanxi         112.8692       36.2658           95       171     2012      08        10        223              0.261542      21.564758       0.000000       0.313735       0.218500   -9999.000000   -9999.000000       0.725000
53879     53879     shanxi         112.8692       36.2658           95       171     2012      08        11        224              0.254542      22.992432       0.000000       0.297692       0.230500       0.237500       0.155500       0.722000
53879     53879     shanxi         112.8692       36.2658           95       171     2012      08        12        225              0.252000      24.523651       4.998518       0.292123       0.228000   -9999.000000       0.154400       0.848000
53879     53879     shanxi         112.8692       36.2658           95       171     2012      08        13        226              0.252875      22.419952      19.354639       0.306856       0.237000       0.134700       0.120000   -9999.000000
53879     53879     shanxi         112.8692       36.2658           95       171     2012      08        14        227              0.300542      20.607239      23.259775       0.318688       0.274000   -9999.000000       0.164500       1.000000
53879     53879     shanxi         112.8692       36.2658           95       171     2012      08        15        228              0.290125      19.904175       0.000000       0.359758       0.270000   -9999.000000       0.160500       0.875000
53879     53879     shanxi         112.8692       36.2658           95       171     2012      08        16        229              0.284208      22.980255       0.071615       0.328329       0.226000       0.195300   -9999.000000       0.847000
53879     53879     shanxi         112.8692       36.2658           95       171     2012      08        17        230              0.287458      23.179352      33.229885       0.317834       0.245000   -9999.000000       0.131200       0.730000
53879     53879     shanxi         112.8692       36.2658           95       171     2012      08        18        231              0.307625      22.516113      18.544655       0.338851   -9999.000000       0.126000       0.165200   -9999.000000
53879     53879     shanxi         112.8692       36.2658           95       171     2012      08        19        232              0.294792      21.234070       0.313239       0.363926       0.266000   -9999.000000       0.157600       0.925000
53879     53879     shanxi         112.8692       36.2658           95       171     2012      08        20        233              0.291000      22.225220       0.101174       0.336403       0.250000       0.254300       0.154800       0.865000
53879     53879     shanxi         112.8692       36.2658           95       171     2012      08        21        234              0.285542      23.047791       0.000000       0.327659       0.219000       0.303100   -9999.000000       0.824000
53879     53879     shanxi         112.8692       36.2658           95       171     2012      08        22        235              0.279875      21.148773       0.000000       0.318495       0.235000   -9999.000000       0.150200   -9999.000000
53879     53879     shanxi         112.8692       36.2658           95       171     2012      08        23        236              0.274333      19.250183       0.000000       0.312858       0.218000       0.116300       0.118200   -9999.000000
53879     53879     shanxi         112.8692       36.2658           95       171     2012      08        24        237              0.270000      18.175415       1.236052       0.308743       0.201000   -9999.000000       0.154000       0.688000
53879     53879     shanxi         112.8692       36.2658           95       171     2012      08        25        238              0.000000      19.659027       0.000000       0.307414       0.251000       0.137300       0.138400       0.687000
53879     53879     shanxi         112.8692       36.2658           95       171     2012      08        26        239              0.265208      19.893646       0.000000       0.303984       0.245000       0.087400       0.145000       0.669000
53879     53879     shanxi         112.8692       36.2658           95       171     2012      08        27        240              0.262417      21.247437       0.723577       0.300822       0.226500   -9999.000000   -9999.000000       0.500000
53879     53879     shanxi         112.8692       36.2658           95       171     2012      08        28        241              0.259500      21.545685       0.000000       0.298357       0.186000   -9999.000000       0.155200   -9999.000000
53879     53879     shanxi         112.8692       36.2658           95       171     2012      08        29        242              0.255375      22.154236       0.000000       0.293851       0.201000   -9999.000000       0.161900       0.521000
53879     53879     shanxi         112.8692       36.2658           95       171     2012      08        30        243              0.250875      22.439392       0.266993       0.288046       0.230000       0.250200       0.173600   -9999.000000
53879     53879     shanxi         112.8692       36.2658           95       171     2012      08        31        244              0.250375      22.250702       3.315939       0.285062       0.294000   -9999.000000       0.156100       0.575000
53879     53879     shanxi         112.8692       36.2658           95       171     2012      09        01        245              0.264667      20.579773      12.203633       0.295528       0.265000   -9999.000000       0.195800   -9999.000000
53879     53879     shanxi         112.8692       36.2658           95       171     2012      09        02        246              0.270333      19.495575       0.000000       0.331836       0.239500       0.254300   -9999.000000       0.845000
53879     53879     shanxi         112.8692       36.2658           95       171     2012      09        03        247              0.264708      18.887482       0.000000       0.312997       0.204000       0.203500       0.162600       0.592000
53879     53879     shanxi         112.8692       36.2658           95       171     2012      09        04        248              0.260875      18.583405       6.605451       0.301770   -9999.000000       0.241300       0.206700   -9999.000000
53879     53879     shanxi         112.8692       36.2658           95       171     2012      09        05        249              0.272000      19.248657       1.133776       0.303874       0.223000       0.091800       0.177500       0.737000
53879     53879     shanxi         112.8692       36.2658           95       171     2012      09        06        250              0.273500      19.604126       9.353194       0.316877       0.264000   -9999.000000       0.179300   -9999.000000
53879     53879     shanxi         112.8692       36.2658           95       171     2012      09        07        251              0.274875      17.604553       0.000000       0.329742       0.241500       0.162200   -9999.000000       0.795000
53879     53879     shanxi         112.8692       36.2658           95       171     2012      09        08        252              0.270042      19.958740       0.000000       0.315982       0.217000       0.279200       0.198800       0.741000
53879     53879     shanxi         112.8692       36.2658           95       171     2012      09        09        253              0.264958      19.699615       0.000000       0.307264       0.199000   -9999.000000       0.170700       0.771000
53879     53879     shanxi         112.8692       36.2658           95       171     2012      09        10        254              0.279167      19.265350      18.699572       0.300029       0.301000       0.035000       0.198700       0.978000
53879     53879     shanxi         112.8692       36.2658           95       171     2012      09        11        255              0.291458      17.043701       1.498856       0.334233       0.215000   -9999.000000       0.175400   -9999.000000
53879     53879     shanxi         112.8692       36.2658           95       171     2012      09        12        256              0.281292      18.845734       0.000000       0.330048       0.186000       0.128000       0.192800       0.841000
53879     53879     shanxi         112.8692       36.2658           95       171     2012      09        13        257              0.275625      14.999756       0.000000       0.316523       0.188000       0.204300   -9999.000000       0.683000
53879     53879     shanxi         112.8692       36.2658           95       171     2012      09        14        258              0.271208      14.805847       0.000000       0.309235       0.178000   -9999.000000       0.167800       0.724000
53879     53879     shanxi         112.8692       36.2658           95       171     2012      09        15        259              0.268875      15.830017       0.171464       0.304859       0.213000   -9999.000000       0.186500       0.603000
53879     53879     shanxi         112.8692       36.2658           95       171     2012      09        16        260              0.265875      16.307281       0.000000       0.302145       0.189000       0.290700       0.157800   -9999.000000
53879     53879     shanxi         112.8692       36.2658           95       171     2012      09        17        261              0.262750      16.149048       0.000000       0.298421       0.184500   -9999.000000       0.194200       0.578000
53879     53879     shanxi         112.8692       36.2658           95       171     2012      09        18        262              0.259833      16.114746       3.082573       0.296656       0.214000   -9999.000000       0.193300       0.718000
53879     53879     shanxi         112.8692       36.2658           95       171     2012      09        19        263              0.264458      15.955841       2.139170       0.306531       0.187000   -9999.000000   -9999.000000       0.897000
53879     53879     shanxi         112.8692       36.2658           95       171     2012      09        20        264              0.265917      15.706085       0.171408       0.308472       0.194000   -9999.000000       0.167500       0.564000
53879     53879     shanxi         112.8692       36.2658           95       171     2012      09        21        265              0.265000      16.900269       2.075359       0.301572   -9999.000000       0.150600       0.208800   -9999.000000
53879     53879     shanxi         112.8692       36.2658           95       171     2012      09        22        266              0.264917      14.941284       0.000000       0.309234       0.204500   -9999.000000       0.180500       0.632000
53879     53879     shanxi         112.8692       36.2658           95       171     2012      09        23        267              0.263125      17.189575       0.000000       0.301194       0.201000       0.032800       0.204000       0.681000
53879     53879     shanxi         112.8692       36.2658           95       171     2012      09        24        268              0.260042      17.247925       0.000000       0.297482       0.194000   -9999.000000   -9999.000000       0.581000
53879     53879     shanxi         112.8692       36.2658           95       171     2012      09        25        269              0.261708      16.992645       5.191792       0.295209       0.204000       0.127800       0.219900       0.850000
53879     53879     shanxi         112.8692       36.2658           95       171     2012      09        26        270              0.267000      16.484467       1.068941       0.309827       0.213000       0.274500       0.179300   -9999.000000
53879     53879     shanxi         112.8692       36.2658           95       171     2012      09        27        271              0.266714      15.864227       0.000000       0.312176   -9999.000000   -9999.000000       0.202700       0.619000
53879     53879     shanxi         112.8692       36.2658           95       171     2012      09        28        272              0.251000      15.031342       0.000000       0.300926       0.175000   -9999.000000       0.182100   -9999.000000
53879     53879     shanxi         112.8692       36.2658           95       171     2012      09        29        273              0.249667      12.544769       4.661563       0.295103       0.210500   -9999.000000       0.207800       0.484000
53879     53879     shanxi         112.8692       36.2658           95       171     2012      09        30        274              0.245875      12.824127      11.293365       0.305950       0.186000       0.118100   -9999.000000   -9999.000000
53879     53879     shanxi         112.8692       36.2658           95       171     2012      10        01        275              0.243083      13.021576       4.533352       0.319469   -9999.000000   -9999.000000       0.131900       0.615000
53879     53879     shanxi         112.8692       36.2658           95       171     2012      10        02        276              0.241417      13.635925       1.817009       0.319263       0.178000   -9999.000000       0.150700       0.639000
53879     53879     shanxi         112.8692       36.2658           95       171     2012      10        03        277              0.238375      15.761902       0.634877       0.312549       0.160000   -9999.000000       0.141600   -9999.000000
53879     53879     shanxi         112.8692       36.2658           95       171     2012      10        04        278              0.243542      15.779205      12.773541       0.304943       0.188500   -9999.000000       0.155500       0.957000
53879     53879     shanxi         112.8692       36.2658           95       171     2012      10        05        279              0.257417      15.314453       0.096966       0.328617       0.168000       0.394600       0.179300   -9999.000000
53879     53879     shanxi         112.8692       36.2658           95       171     2012      10        06        280              0.251958      13.520966       0.000000       0.319903       0.172000       0.389900   -9999.000000       0.731000
53879     53879     shanxi         112.8692       36.2658           95       171     2012      10        07        281              0.247542      14.316528       0.000000       0.311504       0.190000   -9999.000000       0.119700       0.698000
53879     53879     shanxi         112.8692       36.2658           95       171     2012      10        08        282              0.244792      14.006805       0.150998       0.308328       0.191000   -9999.000000       0.170900       0.760000
53879     53879     shanxi         112.8692       36.2658           95       171     2012      10        09        283              0.241125      15.007874       0.000000       0.306126       0.166500       0.351000       0.158900       0.484000
53879     53879     shanxi         112.8692       36.2658           95       171     2012      10        10        284              0.237708      12.440826       0.000000       0.300610       0.175000       0.382500       0.180600   -9999.000000
53879     53879     shanxi         112.8692       36.2658           95       171     2012      10        11        285              0.235292      12.195923       0.000000       0.298228       0.130000       0.217200   -9999.000000       0.525000
53879     53879     shanxi         112.8692       36.2658           95       171     2012      10        12        286              0.232792      13.935394       0.000000       0.297162       0.144000   -9999.000000       0.152400       0.685000
53879     53879     shanxi         112.8692       36.2658           95       171     2012      10        13        287              0.230750      14.431671       0.000000       0.296490       0.140000   -9999.000000       0.151000       0.684000
53879     53879     shanxi         112.8692       36.2658           95       171     2012      10        14        288              0.227083      13.974976       0.324247       0.293697       0.131000       0.302000       0.182000       0.506000
53879     53879     shanxi         112.8692       36.2658           95       171     2012      10        15        289              0.223333      13.483154       1.543954       0.293525       0.154000   -9999.000000       0.121800   -9999.000000
53879     53879     shanxi         112.8692       36.2658           95       171     2012      10        16        290              0.221167      11.965454       0.000000       0.300018       0.142000       0.037700       0.127600       0.639000
53879     53879     shanxi         112.8692       36.2658           95       171     2012      10        17        291              0.219917       8.841400       0.000000       0.296552       0.142000   -9999.000000   -9999.000000       0.488000
53879     53879     shanxi         112.8692       36.2658           95       171     2012      10        18        292              0.221083       8.248352       0.160304       0.292687       0.166000       0.095800       0.103400       0.596000
53879     53879     shanxi         112.8692       36.2658           95       171     2012      10        19        293              0.218625      11.803894       0.000000       0.292380       0.151500       0.200100       0.118900       0.423000
53879     53879     shanxi         112.8692       36.2658           95       171     2012      10        20        294              0.218083      11.820953       0.000000       0.291139       0.141000   -9999.000000       0.111700   -9999.000000
53879     53879     shanxi         112.8692       36.2658           95       171     2012      10        21        295              0.216250      12.538147       6.592678       0.289472       0.154000   -9999.000000       0.135700       0.644000
53879     53879     shanxi         112.8692       36.2658           95       171     2012      10        22        296              0.218583       8.406342       0.050875       0.311672   -9999.000000       0.295600   -9999.000000       0.521000
53879     53879     shanxi         112.8692       36.2658           95       171     2012      10        23        297              0.216500       7.283356       0.000000       0.301514   -9999.000000       0.341600       0.102400       0.467000
53879     53879     shanxi         112.8692       36.2658           95       171     2012      10        24        298              0.217958       7.699463       0.000000       0.299544   -9999.000000       0.241500       0.091900       0.416000
53879     53879     shanxi         112.8692       36.2658           95       171     2012      10        25        299              0.000000       9.297607       0.000000       0.296864       0.148500   -9999.000000       0.100200   -9999.000000
53879     53879     shanxi         112.8692       36.2658           95       171     2012      10        26        300              0.213750       9.449799       0.087466       0.295312       0.153500   -9999.000000       0.092300       0.474000
53879     53879     shanxi         112.8692       36.2658           95       171     2012      10        27        301              0.215458       8.287445       0.000000       0.295464       0.145000       0.334600       0.101300   -9999.000000
53879     53879     shanxi         112.8692       36.2658           95       171     2012      10        28        302              0.000000      10.307220       0.000000       0.293737   -9999.000000   -9999.000000   -9999.000000       0.505000
53879     53879     shanxi         112.8692       36.2658           95       171     2012      10        29        303              0.211875      10.979645       0.000000       0.292186   -9999.000000       0.155600       0.081500   -9999.000000
53879     53879     shanxi         112.8692       36.2658           95       171     2012      10        30        304              0.210250       9.478729       0.000000       0.290798       0.140000   -9999.000000       0.077600       0.259000
53879     53879     shanxi         112.8692       36.2658           95       171     2012      10        31        305              0.208833       6.252472       0.000000       0.281896       0.159000   -9999.000000       0.083400       0.346000
53879     53879     shanxi         112.8692       36.2658           95       171     2012      11        01        306              0.208542       6.146698       0.000000       0.280452       0.145000       0.313400       0.081600   -9999.000000
53879     53879     shanxi         112.8692       36.2658           95       171     2012      11        02        307              0.208333       6.358765       3.183303       0.283786       0.142000   -9999.000000       0.090400       0.372000
53879     53879     shanxi         112.8692       36.2658           95       171     2012      11        03        308              0.208000       8.702942       0.511641       0.290913   -9999.000000       0.090500   -9999.000000   -9999.000000
53879     53879     shanxi         112.8692       36.2658           95       171     2012      11        04        309              0.206250       3.119568       0.000000       0.269277   -9999.000000   -9999.000000       0.064700       0.364000
53879     53879     shanxi         112.8692       36.2658           95       171     2012      11        05        310              0.207500       1.362305       0.000000       0.241003       0.150000   -9999.000000       0.076600       0.332000
53879     53879     shanxi         112.8692       36.2658           95       171     2012      11        06        311              0.209458       2.692657       0.000000       0.251759       0.151000       0.113300       0.076200       0.432000
53879     53879     shanxi         112.8692       36.2658           95       171     2012      11        07        312              0.208583       4.445160       0.000000       0.277982       0.150000   -9999.000000       0.081200       0.350000
53879     53879     shanxi         112.8692       36.2658           95       171     2012      11        08        313              0.208708       3.874329       0.000000       0.277655   -9999.000000   -9999.000000   -9999.000000   -9999.000000
53879     53879     shanxi         112.8692       36.2658           95       171     2012      11        09        314              0.207167       4.640625       0.171833       0.283774       0.168000   -9999.000000       0.084100       0.286000
53879     53879     shanxi         112.8692       36.2658           95       171     2012      11        10        315              0.209875       3.672272       0.505651       0.289448       0.161000       0.325700       0.064200       0.404000
53879     53879     shanxi         112.8692       36.2658           95       171     2012      11        11        316              0.207417       1.854767       0.000000       0.251636       0.151000       0.197100       0.076400       0.468000
53879     53879     shanxi         112.8692       36.2658           95       171     2012      11        12        317              0.208292       0.846619       0.000000       0.228536       0.135000   -9999.000000       0.064200       0.229000
53879     53879     shanxi         112.8692       36.2658           95       171     2012      11        13        318              0.000000       1.495850       0.000000       0.233655       0.144000       0.211900       0.075900   -9999.000000
53879     53879     shanxi         112.8692       36.2658           95       171     2012      11        14        319              0.211125       1.891876       0.000000       0.235828   -9999.000000       0.166600   -9999.000000       0.312000
53879     53879     shanxi         112.8692       36.2658           95       171     2012      11        15        320              0.211375       2.015137       0.711809       0.237488   -9999.000000   -9999.000000       0.053000       0.283000
53879     53879     shanxi         112.8692       36.2658           95       171     2012      11        16        321              0.210167       1.048553       0.000000       0.248138       0.140000       0.122600       0.066000       0.412000
53879     53879     shanxi         112.8692       36.2658           95       171     2012      11        17        322              0.000000       1.262817       0.000000       0.235904       0.138000   -9999.000000       0.066600       0.197000
53879     53879     shanxi         112.8692       36.2658           95       171     2012      11        18        323              0.210875       1.957153       0.000000       0.242217       0.139000   -9999.000000       0.074800   -9999.000000
53879     53879     shanxi         112.8692       36.2658           95       171     2012      11        19        324              0.211125       2.474731       0.000000       0.244253   -9999.000000       0.132700       0.070700       0.244000
53879     53879     shanxi         112.8692       36.2658           95       171     2012      11        20        325              0.211458       2.373688       0.000000       0.257195       0.149000       0.149900   -9999.000000       0.367000
53879     53879     shanxi         112.8692       36.2658           95       171     2012      11        21        326              0.210542       2.537567       0.000000       0.274609       0.117000       0.012100       0.048000       0.287000
53879     53879     shanxi         112.8692       36.2658           95       171     2012      11        22        327              0.209083       3.692505       0.000000       0.276273       0.127000   -9999.000000       0.064200       0.155000
53879     53879     shanxi         112.8692       36.2658           95       171     2012      11        23        328              0.206250       2.178192       0.000000       0.252444       0.122000   -9999.000000       0.053300   -9999.000000
53879     53879     shanxi         112.8692       36.2658           95       171     2012      11        24        329              0.206042      -0.203247       0.000000       0.214923   -9999.000000       0.034600       0.063500       0.198000
53879     53879     shanxi         112.8692       36.2658           95       171     2012      11        25        330              0.206125       0.897125       0.000000       0.224141   -9999.000000   -9999.000000   -9999.000000   -9999.000000
53879     53879     shanxi         112.8692       36.2658           95       171     2012      11        26        331              0.201542      -0.131683       0.000000       0.218377       0.119000       0.175700   -9999.000000       0.064000
53879     53879     shanxi         112.8692       36.2658           95       171     2012      11        27        332              0.201917      -0.777313       0.000000       0.201274       0.134000   -9999.000000       0.044500   -9999.000000
53879     53879     shanxi         112.8692       36.2658           95       171     2012      11        28        333              0.199583      -0.007050       0.000000       0.214024       0.118000       0.151100       0.057200       0.012000
53879     53879     shanxi         112.8692       36.2658           95       171     2012      11        29        334              0.192000      -1.631409       0.000000       0.193536       0.122000       0.047200       0.048500       0.074000
53879     53879     shanxi         112.8692       36.2658           95       171     2012      11        30        335              0.189083      -2.104492       0.000000       0.187302   -9999.000000   -9999.000000       0.062400   -9999.000000
53879     53879     shanxi         112.8692       36.2658           95       171     2012      12        01        336              0.182667      -1.145447       0.512370       0.193121   -9999.000000   -9999.000000   -9999.000000       0.038000
53879     53879     shanxi         112.8692       36.2658           95       171     2012      12        02        337              0.183042      -2.530975       0.000000       0.162186       0.118000       0.271400       0.047300   -9999.000000
53879     53879     shanxi         112.8692       36.2658           95       171     2012      12        03        338              0.181375      -0.953247       0.000000       0.186034       0.121000   -9999.000000       0.059300       0.046000
53879     53879     shanxi         112.8692       36.2658           95       171     2012      12        04        339              0.184250      -2.853149       0.000000       0.179233       0.120000   -9999.000000       0.048100       0.138000
53879     53879     shanxi         112.8692       36.2658           95       171     2012      12        05        340              0.178208      -0.401764       0.000000       0.200207   -9999.000000   -9999.000000       0.062000       0.129000
53879     53879     shanxi         112.8692       36.2658           95       171     2012      12        06        341              0.179417      -3.741119       0.000000       0.169150   -9999.000000   -9999.000000   -9999.000000       0.116000
53879     53879     shanxi         112.8692       36.2658           95       171     2012      12        07        342              0.176875      -1.028870       0.000000       0.189885       0.108000       0.184400       0.057700   -9999.000000
53879     53879     shanxi         112.8692       36.2658           95       171     2012      12        08        343              0.170333      -2.956757       0.000000       0.175514       0.116000       0.116400       0.039700       0.012000
53879     53879     shanxi         112.8692       36.2658           95       171     2012      12        09        344              0.168292      -4.872040       0.000000       0.160358       0.118000   -9999.000000       0.059100       0.010000
53879     53879     shanxi         112.8692       36.2658           95       171     2012      12        10        345              0.167542      -4.292755       0.000000       0.164391       0.122000   -9999.000000       0.050500       0.058000
53879     53879     shanxi         112.8692       36.2658           95       171     2012      12        11        346              0.163542      -3.825348       0.000000       0.171044   -9999.000000       0.220400       0.057800       0.014000
53879     53879     shanxi         112.8692       36.2658           95       171     2012      12        12        347              0.164792      -5.721466       0.000000       0.149041   -9999.000000   -9999.000000   -9999.000000   -9999.000000
53879     53879     shanxi         112.8692       36.2658           95       171     2012      12        13        348              0.166792      -3.854980       1.282595       0.157154   -9999.000000   -9999.000000       0.045400       0.053000
53879     53879     shanxi         112.8692       36.2658           95       171     2012      12        14        349              0.169042      -3.308075       0.000000       0.150869       0.113000   -9999.000000       0.040500       0.103000
53879     53879     shanxi         112.8692       36.2658           95       171     2012      12        15        350              0.000000      -2.775391       0.000000       0.166475   -9999.000000   -9999.000000       0.052600       0.111000
53879     53879     shanxi         112.8692       36.2658           95       171     2012      12        16        351              0.171875      -2.794922       0.084062       0.154841   -9999.000000       0.124800   -9999.000000       0.086000
53879     53879     shanxi         112.8692       36.2658           95       171     2012      12        17        352              0.171375      -1.664642       0.000000       0.173751   -9999.000000   -9999.000000       0.056600   -9999.000000
53879     53879     shanxi         112.8692       36.2658           95       171     2012      12        18        353              0.168667      -1.890656       0.000000       0.184325       0.098000   -9999.000000   -9999.000000       0.028000
53879     53879     shanxi         112.8692       36.2658           95       171     2012      12        19        354              0.167875      -2.901489       1.223791       0.166081   -9999.000000       0.164800       0.034700       0.067000
53879     53879     shanxi         112.8692       36.2658           95       171     2012      12        20        355              0.000000      -3.352844       0.691768       0.153391   -9999.000000       0.194100       0.045000       0.045000
53879     53879     shanxi         112.8692       36.2658           95       171     2012      12        21        356              0.168792      -4.694397       0.000000       0.145796   -9999.000000       0.173800       0.038700       0.031000
53879     53879     shanxi         112.8692       36.2658           95       171     2012      12        22        357              0.164542      -5.635620       0.000000       0.147386   -9999.000000       0.053300       0.045600   -9999.000000
53879     53879     shanxi         112.8692       36.2658           95       171     2012      12        23        358              0.159792      -8.553680       0.000000       0.135276   -9999.000000   -9999.000000   -9999.000000       0.001000
53879     53879     shanxi         112.8692       36.2658           95       171     2012      12        24        359              0.158688     -11.739105       0.000000       0.131248   -9999.000000       0.119500       0.041600   -9999.000000
53879     53879     shanxi         112.8692       36.2658           95       171     2012      12        25        360              0.159958      -8.780243       0.000000       0.131057   -9999.000000       0.120900       0.030900       0.021000
53879     53879     shanxi         112.8692       36.2658           95       171     2012      12        26        361              0.000000      -7.750549       0.000000       0.132781   -9999.000000   -9999.000000       0.041800   -9999.000000
53879     53879     shanxi         112.8692       36.2658           95       171     2012      12        27        362              0.160273      -7.497162       0.000000       0.131911   -9999.000000   -9999.000000       0.035000       0.023000
53879     53879     shanxi         112.8692       36.2658           95       171     2012      12        28        363              0.162000      -5.580261       0.000000       0.134344   -9999.000000   -9999.000000       0.044900       0.049000
53879     53879     shanxi         112.8692       36.2658           95       171     2012      12        29        364              0.000000      -4.554352       0.000000       0.143622   -9999.000000       0.200000   -9999.000000   -9999.000000
53879     53879     shanxi         112.8692       36.2658           95       171     2012      12        30        365              0.000000      -9.601501       0.000000       0.134195   -9999.000000   -9999.000000       0.033100       0.083000
53879     53879     shanxi         112.8692       36.2658           95       171     2012      12        31        366              0.156400      -8.165497       0.000000       0.131618   -9999.000000   -9999.000000       0.038500   -9999.000000
