# Supplementary material for: Research on Fusing Multisatellite Soil Moisture Data Based on Bayesian Model Averaging
Source: Hindawi journal article supplement (doi:10.1155/2018/9310838), 2018-06-25
Supplement: f1 [file 9310838.f1.zip › 2012_sm00-10cm_daily_ZDB_ZHY_53882_366days_allin.txt]

53882     53882     shanxi         113.0667       36.0500           96       172     2012      01        01        001              0.000000   -9999.000000       0.000000   -9999.000000       0.074000   -9999.000000       0.025500   -9999.000000
53882     53882     shanxi         113.0667       36.0500           96       172     2012      01        02        002              0.147625      -2.452942       0.724311       0.182491   -9999.000000       0.071800       0.039400       0.430000
53882     53882     shanxi         113.0667       36.0500           96       172     2012      01        03        003              0.000000      -2.953705       4.137220       0.178852   -9999.000000       0.163000   -9999.000000       0.059000
53882     53882     shanxi         113.0667       36.0500           96       172     2012      01        04        004              0.139083      -6.071777       2.691437       0.158753   -9999.000000       0.072200       0.026500   -9999.000000
53882     53882     shanxi         113.0667       36.0500           96       172     2012      01        05        005              0.139292      -6.714996       0.000000       0.155445   -9999.000000   -9999.000000       0.031200       0.074000
53882     53882     shanxi         113.0667       36.0500           96       172     2012      01        06        006              0.139625      -5.376434       0.000000       0.164786   -9999.000000   -9999.000000       0.040200       0.070000
53882     53882     shanxi         113.0667       36.0500           96       172     2012      01        07        007              0.142667      -4.216858       0.000000       0.169519   -9999.000000       0.047000       0.038900       0.223000
53882     53882     shanxi         113.0667       36.0500           96       172     2012      01        08        008              0.000000      -3.918793       0.000000       0.168502       0.080000       0.058100       0.036400       0.008000
53882     53882     shanxi         113.0667       36.0500           96       172     2012      01        09        009              0.144375      -3.470978       0.000000       0.176415   -9999.000000       0.354600   -9999.000000   -9999.000000
53882     53882     shanxi         113.0667       36.0500           96       172     2012      01        10        010              0.143292      -2.488251       0.000000       0.186568   -9999.000000   -9999.000000       0.010000       0.071000
53882     53882     shanxi         113.0667       36.0500           96       172     2012      01        11        011              0.140708      -2.677002       0.000000       0.186039   -9999.000000   -9999.000000       0.032000   -9999.000000
53882     53882     shanxi         113.0667       36.0500           96       172     2012      01        12        012              0.142500      -3.832428       0.000000       0.174095       0.093000       0.112300       0.024600       0.110000
53882     53882     shanxi         113.0667       36.0500           96       172     2012      01        13        013              0.144083      -2.991730       0.000000       0.181758       0.082000   -9999.000000       0.033100   -9999.000000
53882     53882     shanxi         113.0667       36.0500           96       172     2012      01        14        014              0.145750      -1.756989       0.000000       0.189298   -9999.000000   -9999.000000   -9999.000000   -9999.000000
53882     53882     shanxi         113.0667       36.0500           96       172     2012      01        15        015              0.150292      -1.729828       0.000000       0.188720   -9999.000000       0.095400       0.031100       0.060000
53882     53882     shanxi         113.0667       36.0500           96       172     2012      01        16        016              0.148208      -1.383942       0.000000       0.190667   -9999.000000       0.002000       0.015900   -9999.000000
53882     53882     shanxi         113.0667       36.0500           96       172     2012      01        17        017              0.000000      -2.791962       0.000000       0.177804       0.078000   -9999.000000       0.026100       0.100000
53882     53882     shanxi         113.0667       36.0500           96       172     2012      01        18        018              0.153958      -1.617310       0.000000       0.190239       0.091000   -9999.000000       0.024000   -9999.000000
53882     53882     shanxi         113.0667       36.0500           96       172     2012      01        19        019              0.158917      -0.851440       0.168408       0.197177       0.088000   -9999.000000       0.030500       0.004000
53882     53882     shanxi         113.0667       36.0500           96       172     2012      01        20        020              0.154042      -0.736481       0.000000       0.196702   -9999.000000   -9999.000000   -9999.000000       0.108000
53882     53882     shanxi         113.0667       36.0500           96       172     2012      01        21        021              0.146000      -3.683563       0.074285       0.172466   -9999.000000       0.050200       0.017200       0.307000
53882     53882     shanxi         113.0667       36.0500           96       172     2012      01        22        022              0.142167      -5.771881       0.818207       0.157094   -9999.000000       0.045600       0.024400       0.089000
53882     53882     shanxi         113.0667       36.0500           96       172     2012      01        23        023              0.139250      -7.224976       0.487785       0.153858   -9999.000000   -9999.000000       0.024900   -9999.000000
53882     53882     shanxi         113.0667       36.0500           96       172     2012      01        24        024              0.137167      -7.230988       0.000000       0.152551   -9999.000000   -9999.000000   -9999.000000       0.147000
53882     53882     shanxi         113.0667       36.0500           96       172     2012      01        25        025              0.138875      -7.828125       0.000000       0.150356   -9999.000000       0.011700       0.034400       0.143000
53882     53882     shanxi         113.0667       36.0500           96       172     2012      01        26        026              0.141958      -6.041412       0.000000       0.161420   -9999.000000       0.014100   -9999.000000       0.281000
53882     53882     shanxi         113.0667       36.0500           96       172     2012      01        27        027              0.143917      -2.868591       0.000000       0.182750   -9999.000000   -9999.000000       0.012300       0.093000
53882     53882     shanxi         113.0667       36.0500           96       172     2012      01        28        028              0.146833      -2.577698       0.000000       0.184586       0.101000       0.076500       0.031600   -9999.000000
53882     53882     shanxi         113.0667       36.0500           96       172     2012      01        29        029              0.146250      -1.311310       0.000000       0.193230   -9999.000000   -9999.000000       0.027100       0.318000
53882     53882     shanxi         113.0667       36.0500           96       172     2012      01        30        030              0.150375      -2.366730       0.000000       0.182105       0.090000   -9999.000000       0.036900       0.125000
53882     53882     shanxi         113.0667       36.0500           96       172     2012      01        31        031              0.157625      -1.556152       0.000000       0.191675   -9999.000000   -9999.000000   -9999.000000       0.316000
53882     53882     shanxi         113.0667       36.0500           96       172     2012      02        01        032              0.150958       0.238708       0.000000       0.203661   -9999.000000   -9999.000000       0.028500       0.086000
53882     53882     shanxi         113.0667       36.0500           96       172     2012      02        02        033              0.145292      -3.268280       0.000000       0.181820       0.087000       0.113900       0.019900   -9999.000000
53882     53882     shanxi         113.0667       36.0500           96       172     2012      02        03        034              0.149000      -3.701843       0.000000       0.176856       0.090000       0.120200       0.031500       0.038000
53882     53882     shanxi         113.0667       36.0500           96       172     2012      02        04        035              0.149833      -1.329407       0.000000       0.190297   -9999.000000   -9999.000000       0.026900       0.172000
53882     53882     shanxi         113.0667       36.0500           96       172     2012      02        05        036              0.155333      -1.581177       0.000000       0.189178   -9999.000000   -9999.000000       0.039700       0.291000
53882     53882     shanxi         113.0667       36.0500           96       172     2012      02        06        037              0.150250      -0.283081       0.096205       0.202065   -9999.000000   -9999.000000   -9999.000000       0.001000
53882     53882     shanxi         113.0667       36.0500           96       172     2012      02        07        038              0.143250      -2.816254       0.676112       0.188386       0.078000       0.087900       0.021900   -9999.000000
53882     53882     shanxi         113.0667       36.0500           96       172     2012      02        08        039              0.138750      -4.744232       0.000000       0.170568   -9999.000000       0.125700       0.035300       0.080000
53882     53882     shanxi         113.0667       36.0500           96       172     2012      02        09        040              0.141667      -6.764069       0.000000       0.150327   -9999.000000       0.071800       0.032000   -9999.000000
53882     53882     shanxi         113.0667       36.0500           96       172     2012      02        10        041              0.144750      -4.564575       0.154568       0.163641   -9999.000000       0.048700       0.036300       0.081000
53882     53882     shanxi         113.0667       36.0500           96       172     2012      02        11        042              0.152652      -2.982819       0.000000       0.183206   -9999.000000   -9999.000000       0.040400   -9999.000000
53882     53882     shanxi         113.0667       36.0500           96       172     2012      02        12        043              0.151000      -0.107147       0.000000       0.197343   -9999.000000   -9999.000000   -9999.000000   -9999.000000
53882     53882     shanxi         113.0667       36.0500           96       172     2012      02        13        044              0.149500      -1.969299       0.000000       0.188080       0.080000       0.028200   -9999.000000       0.098000
53882     53882     shanxi         113.0667       36.0500           96       172     2012      02        14        045              0.154875      -1.157379       0.000000       0.192911   -9999.000000   -9999.000000       0.036100   -9999.000000
53882     53882     shanxi         113.0667       36.0500           96       172     2012      02        15        046              0.157708       0.901794       0.000000       0.207132       0.078000   -9999.000000       0.029000       0.239000
53882     53882     shanxi         113.0667       36.0500           96       172     2012      02        16        047              0.152250       0.145813       0.000000       0.204821   -9999.000000   -9999.000000       0.034000   -9999.000000
53882     53882     shanxi         113.0667       36.0500           96       172     2012      02        17        048              0.146667      -1.035095       0.000000       0.195415       0.076000   -9999.000000   -9999.000000       0.031000
53882     53882     shanxi         113.0667       36.0500           96       172     2012      02        18        049              0.147292      -2.200775       0.000000       0.186433       0.086000       0.040500       0.033200       0.166000
53882     53882     shanxi         113.0667       36.0500           96       172     2012      02        19        050              0.152042      -2.246918       0.000000       0.185708       0.078000   -9999.000000       0.018900       0.281000
53882     53882     shanxi         113.0667       36.0500           96       172     2012      02        20        051              0.163667       0.400024       0.000000       0.197673       0.081000       0.093300       0.031200       0.296000
53882     53882     shanxi         113.0667       36.0500           96       172     2012      02        21        052              0.185000       2.167603       0.000000       0.209658   -9999.000000       0.048900   -9999.000000   -9999.000000
53882     53882     shanxi         113.0667       36.0500           96       172     2012      02        22        053              0.195417       2.528778       0.000000       0.213812   -9999.000000   -9999.000000       0.042000       0.189000
53882     53882     shanxi         113.0667       36.0500           96       172     2012      02        23        054              0.205667       4.210297       0.000000       0.221400       0.073000       0.090800   -9999.000000       0.315000
53882     53882     shanxi         113.0667       36.0500           96       172     2012      02        24        055              0.213708       1.940186       0.000000       0.209550       0.075000   -9999.000000       0.022300       0.321000
53882     53882     shanxi         113.0667       36.0500           96       172     2012      02        25        056              0.207917       1.762451       0.000000       0.211099   -9999.000000   -9999.000000       0.032400       0.164000
53882     53882     shanxi         113.0667       36.0500           96       172     2012      02        26        057              0.199417      -0.598694       0.164545       0.196343   -9999.000000       0.155500       0.025700   -9999.000000
53882     53882     shanxi         113.0667       36.0500           96       172     2012      02        27        058              0.200375      -0.181335       0.000000       0.197998   -9999.000000   -9999.000000   -9999.000000       0.261000
53882     53882     shanxi         113.0667       36.0500           96       172     2012      02        28        059              0.210750       1.343628       0.000000       0.204696       0.067000       0.046000       0.030700       0.367000
53882     53882     shanxi         113.0667       36.0500           96       172     2012      02        29        060              0.000000   -9999.000000       0.000000   -9999.000000       0.078000   -9999.000000   -9999.000000   -9999.000000
53882     53882     shanxi         113.0667       36.0500           96       172     2012      03        01        061              0.227083       2.099915       0.515345       0.209096   -9999.000000   -9999.000000       0.010000       0.338000
53882     53882     shanxi         113.0667       36.0500           96       172     2012      03        02        062              0.230000       1.070892       0.164848       0.212490   -9999.000000   -9999.000000       0.031800   -9999.000000
53882     53882     shanxi         113.0667       36.0500           96       172     2012      03        03        063              0.224417       1.072998       0.122082       0.211676   -9999.000000   -9999.000000       0.033000       0.261000
53882     53882     shanxi         113.0667       36.0500           96       172     2012      03        04        064              0.229875       0.020721       0.075731       0.200832       0.095000       0.054700       0.045800       0.346000
53882     53882     shanxi         113.0667       36.0500           96       172     2012      03        05        065              0.236917       1.117004       0.000000       0.208374       0.108000   -9999.000000   -9999.000000       0.693000
53882     53882     shanxi         113.0667       36.0500           96       172     2012      03        06        066              0.223083       2.060944       0.000000       0.214045       0.097000   -9999.000000       0.027600       0.103000
53882     53882     shanxi         113.0667       36.0500           96       172     2012      03        07        067              0.000000       1.238586       0.000000       0.207144       0.095000       0.023400       0.019900   -9999.000000
53882     53882     shanxi         113.0667       36.0500           96       172     2012      03        08        068              0.252125       4.519897       0.000000       0.218592   -9999.000000   -9999.000000       0.033000       0.191000
53882     53882     shanxi         113.0667       36.0500           96       172     2012      03        09        069              0.256583       3.006866       0.000000       0.211982   -9999.000000   -9999.000000       0.033100   -9999.000000
53882     53882     shanxi         113.0667       36.0500           96       172     2012      03        10        070              0.264583       3.483429       0.000000       0.211823       0.096000   -9999.000000       0.043300       0.296000
53882     53882     shanxi         113.0667       36.0500           96       172     2012      03        11        071              0.258292       4.982117       0.000000       0.212128       0.088000   -9999.000000   -9999.000000   -9999.000000
53882     53882     shanxi         113.0667       36.0500           96       172     2012      03        12        072              0.252125       2.695587       0.000000       0.201378       0.086000       0.246400       0.015500   -9999.000000
53882     53882     shanxi         113.0667       36.0500           96       172     2012      03        13        073              0.260500       3.727600       0.154637       0.204776   -9999.000000   -9999.000000       0.032900       0.317000
53882     53882     shanxi         113.0667       36.0500           96       172     2012      03        14        074              0.272870       7.442047       0.000000       0.212607   -9999.000000   -9999.000000   -9999.000000   -9999.000000
53882     53882     shanxi         113.0667       36.0500           96       172     2012      03        15        075              0.272125       7.262848       5.899426       0.209673       0.087000       0.283700       0.045100       0.449000
53882     53882     shanxi         113.0667       36.0500           96       172     2012      03        16        076              0.269750       3.677429       0.000000       0.210351       0.086000   -9999.000000   -9999.000000   -9999.000000
53882     53882     shanxi         113.0667       36.0500           96       172     2012      03        17        077              0.271375       7.579895       0.000000       0.211517       0.078000       0.237900   -9999.000000       0.272000
53882     53882     shanxi         113.0667       36.0500           96       172     2012      03        18        078              0.272750      10.346527       0.000000       0.207098   -9999.000000   -9999.000000       0.010000       0.350000
53882     53882     shanxi         113.0667       36.0500           96       172     2012      03        19        079              0.270167       6.517059       0.151994       0.202300   -9999.000000   -9999.000000       0.039600       0.476000
53882     53882     shanxi         113.0667       36.0500           96       172     2012      03        20        080              0.269083       1.542694       0.171214       0.200871       0.079000       0.127500       0.041000       0.376000
53882     53882     shanxi         113.0667       36.0500           96       172     2012      03        21        081              0.274792       4.332336       0.680682       0.209018   -9999.000000   -9999.000000       0.060200   -9999.000000
53882     53882     shanxi         113.0667       36.0500           96       172     2012      03        22        082              0.315250       1.558167       1.425486       0.207706   -9999.000000       0.162800   -9999.000000       0.392000
53882     53882     shanxi         113.0667       36.0500           96       172     2012      03        23        083              0.305583       2.577515       0.483536       0.227373       0.092000   -9999.000000       0.031000       0.355000
53882     53882     shanxi         113.0667       36.0500           96       172     2012      03        24        084              0.288583       4.970123       0.291496       0.221606   -9999.000000       0.242200   -9999.000000       0.632000
53882     53882     shanxi         113.0667       36.0500           96       172     2012      03        25        085              0.000000       8.879608       0.000000       0.214675       0.090000   -9999.000000       0.038500       0.434000
53882     53882     shanxi         113.0667       36.0500           96       172     2012      03        26        086              0.280125      10.972839       0.000000       0.206151       0.092000   -9999.000000       0.044600   -9999.000000
53882     53882     shanxi         113.0667       36.0500           96       172     2012      03        27        087              0.273500      11.919220       0.000000       0.198845       0.080000       0.205000       0.052500       0.497000
53882     53882     shanxi         113.0667       36.0500           96       172     2012      03        28        088              0.269083      13.278229       0.000000       0.192258       0.082000       0.340600   -9999.000000       0.443000
53882     53882     shanxi         113.0667       36.0500           96       172     2012      03        29        089              0.268792      13.756836       0.000000       0.189156   -9999.000000   -9999.000000       0.024400       0.475000
53882     53882     shanxi         113.0667       36.0500           96       172     2012      03        30        090              0.258167      14.344788       0.979248       0.187411   -9999.000000       0.173900       0.041100       0.304000
53882     53882     shanxi         113.0667       36.0500           96       172     2012      03        31        091              0.254125       9.479248       0.000000       0.185887       0.075000   -9999.000000       0.033900   -9999.000000
53882     53882     shanxi         113.0667       36.0500           96       172     2012      04        01        092              0.249500      12.322815       0.000000       0.182433       0.082000   -9999.000000       0.043000       0.191000
53882     53882     shanxi         113.0667       36.0500           96       172     2012      04        02        093              0.241542      14.709625       0.048346       0.179749       0.089000       0.131100   -9999.000000       0.372000
53882     53882     shanxi         113.0667       36.0500           96       172     2012      04        03        094              0.240750       7.677338       0.000000       0.182542   -9999.000000   -9999.000000       0.046100       0.429000
53882     53882     shanxi         113.0667       36.0500           96       172     2012      04        04        095              0.243500      11.422546       0.000000       0.180231   -9999.000000       0.104300       0.017500       0.253000
53882     53882     shanxi         113.0667       36.0500           96       172     2012      04        05        096              0.241208      14.406189       0.000000       0.176571       0.076000   -9999.000000       0.042800   -9999.000000
53882     53882     shanxi         113.0667       36.0500           96       172     2012      04        06        097              0.234833      14.984100       0.000000       0.173930       0.082000   -9999.000000       0.031700       0.192000
53882     53882     shanxi         113.0667       36.0500           96       172     2012      04        07        098              0.229875      15.596893       0.000000       0.172660       0.076000       0.138100       0.037000   -9999.000000
53882     53882     shanxi         113.0667       36.0500           96       172     2012      04        08        099              0.224458      16.897095       0.000000       0.171502   -9999.000000       0.231000   -9999.000000       0.280000
53882     53882     shanxi         113.0667       36.0500           96       172     2012      04        09        100              0.214458      18.741852       1.359498       0.170437   -9999.000000       0.071600       0.056800   -9999.000000
53882     53882     shanxi         113.0667       36.0500           96       172     2012      04        10        101              0.224792      15.246002       0.443144       0.187424       0.079000   -9999.000000       0.049400   -9999.000000
53882     53882     shanxi         113.0667       36.0500           96       172     2012      04        11        102              0.242042      15.367462       0.000000       0.197057       0.093000       0.064500       0.082900       0.326000
53882     53882     shanxi         113.0667       36.0500           96       172     2012      04        12        103              0.276875      15.918671       0.259674       0.190483       0.106000   -9999.000000       0.055900   -9999.000000
53882     53882     shanxi         113.0667       36.0500           96       172     2012      04        13        104              0.257167      11.984009       1.716385       0.185506       0.091000   -9999.000000       0.053200       0.379000
53882     53882     shanxi         113.0667       36.0500           96       172     2012      04        14        105              0.239833      16.586548       0.471943       0.178414   -9999.000000   -9999.000000   -9999.000000   -9999.000000
53882     53882     shanxi         113.0667       36.0500           96       172     2012      04        15        106              0.227958      15.767181       0.000000       0.174792       0.082000       0.150800       0.025400       0.245000
53882     53882     shanxi         113.0667       36.0500           96       172     2012      04        16        107              0.216500      18.679260       0.000000       0.171552       0.093000   -9999.000000       0.057600       0.350000
53882     53882     shanxi         113.0667       36.0500           96       172     2012      04        17        108              0.206125      17.442688       1.671258       0.170809       0.085000       0.080200       0.041100       0.491000
53882     53882     shanxi         113.0667       36.0500           96       172     2012      04        18        109              0.199458      17.768433       0.098029       0.170991       0.080000   -9999.000000   -9999.000000       0.286000
53882     53882     shanxi         113.0667       36.0500           96       172     2012      04        19        110              0.193708      18.429352       3.539778       0.170823       0.090000   -9999.000000   -9999.000000   -9999.000000
53882     53882     shanxi         113.0667       36.0500           96       172     2012      04        20        111              0.192042      20.255157       3.330071       0.188725   -9999.000000       0.140200       0.068600       0.263000
53882     53882     shanxi         113.0667       36.0500           96       172     2012      04        21        112              0.200333      15.304138       1.300195       0.242265       0.110500   -9999.000000       0.032300       0.550000
53882     53882     shanxi         113.0667       36.0500           96       172     2012      04        22        113              0.193913      16.942230       0.000000       0.235928       0.095500       0.231200       0.056300       0.524000
53882     53882     shanxi         113.0667       36.0500           96       172     2012      04        23        114              0.183708      20.290131       0.823340       0.214352       0.095000   -9999.000000       0.052500       0.360000
53882     53882     shanxi         113.0667       36.0500           96       172     2012      04        24        115              0.220917      22.215454       2.986914       0.203182   -9999.000000   -9999.000000       0.111100   -9999.000000
53882     53882     shanxi         113.0667       36.0500           96       172     2012      04        25        116              0.000000      13.054474       0.000000       0.240524   -9999.000000       0.442200   -9999.000000       0.748000
53882     53882     shanxi         113.0667       36.0500           96       172     2012      04        26        117              0.207375      14.034729       0.176693       0.219239       0.092000       0.245700       0.052100       0.350000
53882     53882     shanxi         113.0667       36.0500           96       172     2012      04        27        118              0.184833      19.033813       0.000000       0.198829       0.092500       0.258800   -9999.000000       0.478000
53882     53882     shanxi         113.0667       36.0500           96       172     2012      04        28        119              0.192083      20.640686       0.000000       0.183775       0.091000   -9999.000000       0.063700       0.309000
53882     53882     shanxi         113.0667       36.0500           96       172     2012      04        29        120              0.192583      21.301575       1.317188       0.176522   -9999.000000       0.051900       0.057800   -9999.000000
53882     53882     shanxi         113.0667       36.0500           96       172     2012      04        30        121              0.191292      21.490784       0.000000       0.174289       0.090000       0.093800   -9999.000000       0.241000
53882     53882     shanxi         113.0667       36.0500           96       172     2012      05        01        122              0.190708      21.488220       0.000000       0.173796       0.110500   -9999.000000   -9999.000000       0.368000
53882     53882     shanxi         113.0667       36.0500           96       172     2012      05        02        123              0.188917      21.473541       5.822089       0.172083       0.123500       0.038500       0.022000       0.454000
53882     53882     shanxi         113.0667       36.0500           96       172     2012      05        03        124              0.187792      22.512909       0.000000       0.170620       0.103000   -9999.000000       0.050900       0.178000
53882     53882     shanxi         113.0667       36.0500           96       172     2012      05        04        125              0.187583      23.055115       0.132977       0.168413       0.103000   -9999.000000       0.038300   -9999.000000
53882     53882     shanxi         113.0667       36.0500           96       172     2012      05        05        126              0.184958      25.091858       0.685515       0.166347       0.105000   -9999.000000       0.052300       0.288000
53882     53882     shanxi         113.0667       36.0500           96       172     2012      05        06        127              0.182292      26.052551       0.082251       0.165174       0.106000   -9999.000000   -9999.000000   -9999.000000
53882     53882     shanxi         113.0667       36.0500           96       172     2012      05        07        128              0.177792      26.546417       0.301478       0.164257   -9999.000000   -9999.000000       0.044500       0.363000
53882     53882     shanxi         113.0667       36.0500           96       172     2012      05        08        129              0.176208      25.293335       1.148668       0.166064       0.104000       0.186800       0.026300   -9999.000000
53882     53882     shanxi         113.0667       36.0500           96       172     2012      05        09        130              0.174125      25.310150       0.557043       0.177058       0.104000   -9999.000000       0.048100   -9999.000000
53882     53882     shanxi         113.0667       36.0500           96       172     2012      05        10        131              0.173348      23.943817       0.000000       0.172328       0.115000   -9999.000000       0.038500       0.362000
53882     53882     shanxi         113.0667       36.0500           96       172     2012      05        11        132              0.172083      26.341644       6.155451       0.165939       0.177000   -9999.000000       0.047000   -9999.000000
53882     53882     shanxi         113.0667       36.0500           96       172     2012      05        12        133              0.177000      22.838287       0.807605       0.209608       0.127000       0.150700   -9999.000000       0.347000
53882     53882     shanxi         113.0667       36.0500           96       172     2012      05        13        134              0.177292      17.428223       0.385496       0.225296       0.112500       0.214600       0.033700   -9999.000000
53882     53882     shanxi         113.0667       36.0500           96       172     2012      05        14        135              0.174667      19.930023       0.000000       0.199995       0.105000       0.106400       0.054000       0.205000
53882     53882     shanxi         113.0667       36.0500           96       172     2012      05        15        136              0.172375      19.851837       0.103538       0.181933   -9999.000000       0.172600       0.041800       0.311000
53882     53882     shanxi         113.0667       36.0500           96       172     2012      05        16        137              0.169875      21.188843       0.802509       0.172315   -9999.000000   -9999.000000       0.053700       0.489000
53882     53882     shanxi         113.0667       36.0500           96       172     2012      05        17        138              0.168500      21.890930       0.000000       0.174163       0.102000       0.099600       0.053300       0.294000
53882     53882     shanxi         113.0667       36.0500           96       172     2012      05        18        139              0.164833      24.683594       0.677057       0.168128       0.117500       0.052700   -9999.000000   -9999.000000
53882     53882     shanxi         113.0667       36.0500           96       172     2012      05        19        140              0.162083      25.202515       0.409709       0.164760       0.097000   -9999.000000       0.018300       0.388000
53882     53882     shanxi         113.0667       36.0500           96       172     2012      05        20        141              0.158708      25.731842       0.343382       0.166621   -9999.000000       0.061300       0.057400       0.376000
53882     53882     shanxi         113.0667       36.0500           96       172     2012      05        21        142              0.153833      25.221466       0.516349       0.165523       0.162000   -9999.000000       0.037800       0.425000
53882     53882     shanxi         113.0667       36.0500           96       172     2012      05        22        143              0.153333      19.743958       0.648226       0.169748       0.143000   -9999.000000       0.051400       0.336000
53882     53882     shanxi         113.0667       36.0500           96       172     2012      05        23        144              0.165708      19.733582      11.543216       0.179139   -9999.000000       0.173600   -9999.000000   -9999.000000
53882     53882     shanxi         113.0667       36.0500           96       172     2012      05        24        145              0.196500      20.231598       0.274549       0.244699       0.161000   -9999.000000       0.061000       1.000000
53882     53882     shanxi         113.0667       36.0500           96       172     2012      05        25        146              0.000000      19.342010       0.000000       0.255513       0.135000   -9999.000000       0.034000       0.457000
53882     53882     shanxi         113.0667       36.0500           96       172     2012      05        26        147              0.183083      21.633331       0.416463       0.223729       0.136000       0.145000       0.052800       0.519000
53882     53882     shanxi         113.0667       36.0500           96       172     2012      05        27        148              0.177167      21.692780       0.910733       0.207540       0.154000   -9999.000000       0.036900       0.343000
53882     53882     shanxi         113.0667       36.0500           96       172     2012      05        28        149              0.168583      24.808258       1.636044       0.189086       0.129000       0.204300       0.047800   -9999.000000
53882     53882     shanxi         113.0667       36.0500           96       172     2012      05        29        150              0.163750      24.222626       1.047160       0.182834       0.166000   -9999.000000   -9999.000000       0.489000
53882     53882     shanxi         113.0667       36.0500           96       172     2012      05        30        151              0.165167      20.389435       0.000000       0.210126       0.126000   -9999.000000       0.030800   -9999.000000
53882     53882     shanxi         113.0667       36.0500           96       172     2012      05        31        152              0.160792      23.631958       0.000000       0.186263       0.133000       0.272100   -9999.000000   -9999.000000
53882     53882     shanxi         113.0667       36.0500           96       172     2012      06        01        153              0.180000      22.960175      17.128519       0.176059   -9999.000000   -9999.000000       0.040100       0.561000
53882     53882     shanxi         113.0667       36.0500           96       172     2012      06        02        154              0.222833      22.904449       1.510963       0.257069       0.113500   -9999.000000       0.067100   -9999.000000
53882     53882     shanxi         113.0667       36.0500           96       172     2012      06        03        155              0.201583      21.444275       0.000000       0.282579       0.125000   -9999.000000       0.053900       0.492000
53882     53882     shanxi         113.0667       36.0500           96       172     2012      06        04        156              0.189542      21.972717       0.000000       0.250580       0.110000       0.064500   -9999.000000   -9999.000000
53882     53882     shanxi         113.0667       36.0500           96       172     2012      06        05        157              0.177292      24.569946       1.328246       0.223923   -9999.000000       0.181900       0.025700       0.424000
53882     53882     shanxi         113.0667       36.0500           96       172     2012      06        06        158              0.167125      24.352875       0.435179       0.217428       0.138000   -9999.000000       0.072500   -9999.000000
53882     53882     shanxi         113.0667       36.0500           96       172     2012      06        07        159              0.165042      18.996063       1.169752       0.226756       0.118500       0.251400       0.052000   -9999.000000
53882     53882     shanxi         113.0667       36.0500           96       172     2012      06        08        160              0.157542      24.055023       0.000000       0.205847       0.125500       0.176600       0.062400       0.410000
53882     53882     shanxi         113.0667       36.0500           96       172     2012      06        09        161              0.151750      24.810394       0.163132       0.189038       0.107000       0.236000   -9999.000000   -9999.000000
53882     53882     shanxi         113.0667       36.0500           96       172     2012      06        10        162              0.144958      27.257996       0.254992       0.177025       0.114000       0.204600       0.052600       0.439000
53882     53882     shanxi         113.0667       36.0500           96       172     2012      06        11        163              0.000000      26.163116       1.792814       0.173033       0.110000   -9999.000000       0.051900   -9999.000000
53882     53882     shanxi         113.0667       36.0500           96       172     2012      06        12        164              0.145625      26.076263       0.118332       0.168802       0.109000       0.216800       0.077500       0.260000
53882     53882     shanxi         113.0667       36.0500           96       172     2012      06        13        165              0.144500      27.015533       0.052052       0.166091       0.127500       0.138600       0.064800       0.466000
53882     53882     shanxi         113.0667       36.0500           96       172     2012      06        14        166              0.140542      29.090057       0.000000       0.164090       0.132000   -9999.000000       0.076400       0.702000
53882     53882     shanxi         113.0667       36.0500           96       172     2012      06        15        167              0.139042      26.558319       0.218731       0.163118       0.122000       0.123600   -9999.000000       0.359000
53882     53882     shanxi         113.0667       36.0500           96       172     2012      06        16        168              0.137625      26.667114       0.427537       0.163678       0.104000   -9999.000000       0.061300   -9999.000000
53882     53882     shanxi         113.0667       36.0500           96       172     2012      06        17        169              0.135833      28.055878       0.000000       0.161922       0.116000   -9999.000000       0.077600       0.407000
53882     53882     shanxi         113.0667       36.0500           96       172     2012      06        18        170              0.134042      29.205658       0.000000       0.160491       0.117500       0.122200       0.069900       0.569000
53882     53882     shanxi         113.0667       36.0500           96       172     2012      06        19        171              0.132792      29.837646       0.100879       0.159520       0.130000   -9999.000000       0.082200       0.624000
53882     53882     shanxi         113.0667       36.0500           96       172     2012      06        20        172              0.131375      29.936249       0.363921       0.159386       0.115000       0.259500   -9999.000000       0.426000
53882     53882     shanxi         113.0667       36.0500           96       172     2012      06        21        173              0.129417      28.792328       1.921427       0.158918       0.115000   -9999.000000   -9999.000000   -9999.000000
53882     53882     shanxi         113.0667       36.0500           96       172     2012      06        22        174              0.129458      26.992035       0.569103       0.176841       0.121000   -9999.000000       0.046700       0.541000
53882     53882     shanxi         113.0667       36.0500           96       172     2012      06        23        175              0.129833      28.714478       6.914118       0.169829       0.141000       0.168800       0.095100       0.755000
53882     53882     shanxi         113.0667       36.0500           96       172     2012      06        24        176              0.206750      25.192535      13.229717       0.228924       0.181000   -9999.000000       0.084400       1.000000
53882     53882     shanxi         113.0667       36.0500           96       172     2012      06        25        177              0.231292      23.040558       2.339042       0.302062   -9999.000000       0.135600       0.137200       1.000000
53882     53882     shanxi         113.0667       36.0500           96       172     2012      06        26        178              0.232292      22.829773       0.915456       0.280162   -9999.000000       0.137100   -9999.000000   -9999.000000
53882     53882     shanxi         113.0667       36.0500           96       172     2012      06        27        179              0.222000      23.488586       0.272610       0.264809       0.159000   -9999.000000       0.107800       0.846000
53882     53882     shanxi         113.0667       36.0500           96       172     2012      06        28        180              0.211833      22.474792      13.514784       0.250087       0.172000       0.238300       0.129900       0.800000
53882     53882     shanxi         113.0667       36.0500           96       172     2012      06        29        181              0.285417      22.681030      11.941810       0.266703       0.173000   -9999.000000       0.131100       1.000000
53882     53882     shanxi         113.0667       36.0500           96       172     2012      06        30        182              0.264958      21.233246       0.674342       0.332040       0.144000   -9999.000000       0.107100   -9999.000000
53882     53882     shanxi         113.0667       36.0500           96       172     2012      07        01        183              0.241042      24.973785       0.000000       0.287348       0.156000       0.238400       0.106800   -9999.000000
53882     53882     shanxi         113.0667       36.0500           96       172     2012      07        02        184              0.260625      26.603668       2.530148       0.263585       0.161000   -9999.000000   -9999.000000       0.800000
53882     53882     shanxi         113.0667       36.0500           96       172     2012      07        03        185              0.280333      26.572693       0.000000       0.259022       0.143000       0.370400       0.084800   -9999.000000
53882     53882     shanxi         113.0667       36.0500           96       172     2012      07        04        186              0.276042      27.030060       2.166797       0.245696       0.208000   -9999.000000       0.133800       0.920000
53882     53882     shanxi         113.0667       36.0500           96       172     2012      07        05        187              0.262208      23.553680       0.000000       0.256061       0.144000   -9999.000000       0.108300   -9999.000000
53882     53882     shanxi         113.0667       36.0500           96       172     2012      07        06        188              0.238333      26.028809       0.309243       0.236398   -9999.000000   -9999.000000       0.119400   -9999.000000
53882     53882     shanxi         113.0667       36.0500           96       172     2012      07        07        189              0.231083      26.286743       2.691033       0.219859   -9999.000000   -9999.000000   -9999.000000       0.792000
53882     53882     shanxi         113.0667       36.0500           96       172     2012      07        08        190              0.253250      23.406586      55.227955       0.245903   -9999.000000       0.371300       0.158300   -9999.000000
53882     53882     shanxi         113.0667       36.0500           96       172     2012      07        09        191              0.331250      25.259399      15.514361       0.299677       0.245000   -9999.000000       0.129000       1.000000
53882     53882     shanxi         113.0667       36.0500           96       172     2012      07        10        192              0.305833      23.480286       0.054216       0.370687       0.184000   -9999.000000       0.182800   -9999.000000
53882     53882     shanxi         113.0667       36.0500           96       172     2012      07        11        193              0.284417      26.103485       0.758775       0.333343       0.167000       0.362800       0.146000       0.924000
53882     53882     shanxi         113.0667       36.0500           96       172     2012      07        12        194              0.263250      26.847046       0.130618       0.318363   -9999.000000       0.162900       0.166000       0.793000
53882     53882     shanxi         113.0667       36.0500           96       172     2012      07        13        195              0.251792      27.234192      11.659837       0.303547       0.215000       0.187300   -9999.000000       0.672000
53882     53882     shanxi         113.0667       36.0500           96       172     2012      07        14        196              0.279167      23.359680       3.055274       0.331823       0.190000       0.243500       0.160900       0.878000
53882     53882     shanxi         113.0667       36.0500           96       172     2012      07        15        197              0.275250      22.023102       0.796902       0.329598       0.198000   -9999.000000       0.154900   -9999.000000
53882     53882     shanxi         113.0667       36.0500           96       172     2012      07        16        198              0.266083      23.326111       0.000000       0.315647       0.180000       0.413300       0.155900       0.903000
53882     53882     shanxi         113.0667       36.0500           96       172     2012      07        17        199              0.255667      23.497101       0.000000       0.306221       0.165000   -9999.000000       0.154100       0.730000
53882     53882     shanxi         113.0667       36.0500           96       172     2012      07        18        200              0.246833      24.669556       0.000000       0.295743       0.162000   -9999.000000       0.146500       0.774000
53882     53882     shanxi         113.0667       36.0500           96       172     2012      07        19        201              0.234458      24.989410       0.000000       0.287253       0.173000       0.113800   -9999.000000       0.602000
53882     53882     shanxi         113.0667       36.0500           96       172     2012      07        20        202              0.220783      25.471100       0.248206       0.279194       0.168500   -9999.000000       0.090100   -9999.000000
53882     53882     shanxi         113.0667       36.0500           96       172     2012      07        21        203              0.222783      27.006561      11.783837       0.270531       0.211000       0.307300       0.148500       0.666000
53882     53882     shanxi         113.0667       36.0500           96       172     2012      07        22        204              0.269208      25.628723       0.232998       0.300893       0.208000   -9999.000000       0.120100       0.798000
53882     53882     shanxi         113.0667       36.0500           96       172     2012      07        23        205              0.258333      24.019287       1.453034       0.302172       0.208000       0.221500       0.160300       0.912000
53882     53882     shanxi         113.0667       36.0500           96       172     2012      07        24        206              0.248458      24.544922       0.059197       0.286559       0.211000       0.198300   -9999.000000       0.703000
53882     53882     shanxi         113.0667       36.0500           96       172     2012      07        25        207              0.235667      26.438385       2.828352       0.274848       0.183500   -9999.000000       0.146700   -9999.000000
53882     53882     shanxi         113.0667       36.0500           96       172     2012      07        26        208              0.217042      27.880310       0.155518       0.264820       0.196500       0.194000       0.113700       0.681000
53882     53882     shanxi         113.0667       36.0500           96       172     2012      07        27        209              0.197250      28.632629       0.270882       0.253417       0.173000   -9999.000000       0.152600       0.746000
53882     53882     shanxi         113.0667       36.0500           96       172     2012      07        28        210              0.182833      28.975250       0.162142       0.240766       0.162000   -9999.000000       0.126700       0.772000
53882     53882     shanxi         113.0667       36.0500           96       172     2012      07        29        211              0.174625      29.499939       0.071605       0.229811       0.194000       0.143200       0.157100       0.533000
53882     53882     shanxi         113.0667       36.0500           96       172     2012      07        30        212              0.172042      29.785339      26.477219       0.217548       0.185000   -9999.000000   -9999.000000   -9999.000000
53882     53882     shanxi         113.0667       36.0500           96       172     2012      07        31        213              0.250833      28.631409       5.038848       0.271816       0.287500       0.087600       0.116200       0.863000
53882     53882     shanxi         113.0667       36.0500           96       172     2012      08        01        214              0.264000      24.410095      25.899677       0.333366       0.250000   -9999.000000       0.126600   -9999.000000
53882     53882     shanxi         113.0667       36.0500           96       172     2012      08        02        215              0.274217      24.871643       7.049933       0.332477       0.228000       0.294700       0.118400       0.904000
53882     53882     shanxi         113.0667       36.0500           96       172     2012      08        03        216              0.262583      24.143158       1.890772       0.357005       0.213000       0.229200       0.128800   -9999.000000
53882     53882     shanxi         113.0667       36.0500           96       172     2012      08        04        217              0.249875      24.461731       1.197356       0.331381       0.231000   -9999.000000       0.126900   -9999.000000
53882     53882     shanxi         113.0667       36.0500           96       172     2012      08        05        218              0.246875      24.827667       0.575566       0.321266       0.221000       0.154500   -9999.000000       0.904000
53882     53882     shanxi         113.0667       36.0500           96       172     2012      08        06        219              0.236792      24.141327       0.000000       0.318833       0.223000       0.339600       0.098900   -9999.000000
53882     53882     shanxi         113.0667       36.0500           96       172     2012      08        07        220              0.223417      25.457001       0.000000       0.308675       0.193000   -9999.000000   -9999.000000       0.828000
53882     53882     shanxi         113.0667       36.0500           96       172     2012      08        08        221              0.210083      26.059540       0.599155       0.298944   -9999.000000       0.105500       0.160300   -9999.000000
53882     53882     shanxi         113.0667       36.0500           96       172     2012      08        09        222              0.198958      26.842773       1.293013       0.292024       0.198000   -9999.000000       0.190300       0.761000
53882     53882     shanxi         113.0667       36.0500           96       172     2012      08        10        223              0.188750      23.334229       0.000000       0.292636       0.170500       0.178300   -9999.000000       0.712000
53882     53882     shanxi         113.0667       36.0500           96       172     2012      08        11        224              0.179208      24.529663       0.000000       0.280824       0.206000       0.334600       0.175800       0.794000
53882     53882     shanxi         113.0667       36.0500           96       172     2012      08        12        225              0.173565      26.522705       4.235357       0.273062       0.204000       0.368500       0.150800       0.988000
53882     53882     shanxi         113.0667       36.0500           96       172     2012      08        13        226              0.170667      23.735077       3.503838       0.290431   -9999.000000       0.285700       0.165500   -9999.000000
53882     53882     shanxi         113.0667       36.0500           96       172     2012      08        14        227              0.173500      21.196381      10.435329       0.296686       0.213000   -9999.000000       0.185900       1.000000
53882     53882     shanxi         113.0667       36.0500           96       172     2012      08        15        228              0.178542      20.892059       0.000000       0.331175       0.226000       0.198500       0.187800       0.813000
53882     53882     shanxi         113.0667       36.0500           96       172     2012      08        16        229              0.173083      24.185181       0.000000       0.304679       0.192000       0.217100   -9999.000000       0.923000
53882     53882     shanxi         113.0667       36.0500           96       172     2012      08        17        230              0.167875      24.536346      10.886042       0.292552       0.215500   -9999.000000       0.153900       0.690000
53882     53882     shanxi         113.0667       36.0500           96       172     2012      08        18        231              0.217875      24.356964      27.624779       0.300110   -9999.000000       0.116900       0.216500   -9999.000000
53882     53882     shanxi         113.0667       36.0500           96       172     2012      08        19        232              0.251042      22.073578       0.190329       0.368269       0.205000   -9999.000000       0.172200       0.975000
53882     53882     shanxi         113.0667       36.0500           96       172     2012      08        20        233              0.247833      22.757721       0.030553       0.337992       0.194000       0.198600       0.238700       0.885000
53882     53882     shanxi         113.0667       36.0500           96       172     2012      08        21        234              0.236333      23.746002       0.000000       0.327273       0.149000       0.117000   -9999.000000       0.993000
53882     53882     shanxi         113.0667       36.0500           96       172     2012      08        22        235              0.222130      22.547363       0.000000       0.315881       0.171000   -9999.000000   -9999.000000   -9999.000000
53882     53882     shanxi         113.0667       36.0500           96       172     2012      08        23        236              0.207667      20.554840       0.000000       0.307940       0.178000       0.275100       0.115800   -9999.000000
53882     53882     shanxi         113.0667       36.0500           96       172     2012      08        24        237              0.197292      19.211273       0.996244       0.302110       0.179000       0.377200       0.235700       0.762000
53882     53882     shanxi         113.0667       36.0500           96       172     2012      08        25        238              0.000000      20.895050       0.000000       0.299009       0.195000   -9999.000000       0.180600       0.655000
53882     53882     shanxi         113.0667       36.0500           96       172     2012      08        26        239              0.180625      21.097687       0.000000       0.293886       0.188500       0.156700       0.223500       0.746000
53882     53882     shanxi         113.0667       36.0500           96       172     2012      08        27        240              0.167667      22.642975       7.331137       0.288786       0.197500   -9999.000000   -9999.000000       0.529000
53882     53882     shanxi         113.0667       36.0500           96       172     2012      08        28        241              0.156583      22.983734       0.000000       0.284383       0.185000       0.122200       0.177000   -9999.000000
53882     53882     shanxi         113.0667       36.0500           96       172     2012      08        29        242              0.149250      23.798096       0.000000       0.279237       0.188000       0.138200       0.163500       0.570000
53882     53882     shanxi         113.0667       36.0500           96       172     2012      08        30        243              0.143875      24.493256       0.271826       0.271110       0.176000       0.140000       0.195400   -9999.000000
53882     53882     shanxi         113.0667       36.0500           96       172     2012      08        31        244              0.141167      24.490356       1.733428       0.265366       0.268000       0.105700       0.172000       0.715000
53882     53882     shanxi         113.0667       36.0500           96       172     2012      09        01        245              0.160792      22.177979      13.401000       0.274639       0.206000   -9999.000000       0.223900   -9999.000000
53882     53882     shanxi         113.0667       36.0500           96       172     2012      09        02        246              0.200250      21.147827       0.162376       0.325509       0.181500   -9999.000000   -9999.000000   -9999.000000
53882     53882     shanxi         113.0667       36.0500           96       172     2012      09        03        247              0.193083      19.999512       2.126436       0.311810       0.164000       0.125800       0.128600       0.655000
53882     53882     shanxi         113.0667       36.0500           96       172     2012      09        04        248              0.184708      20.112122       5.063636       0.296965   -9999.000000   -9999.000000       0.188300   -9999.000000
53882     53882     shanxi         113.0667       36.0500           96       172     2012      09        05        249              0.198250      20.438171       0.763093       0.296516       0.169000   -9999.000000       0.165300       0.709000
53882     53882     shanxi         113.0667       36.0500           96       172     2012      09        06        250              0.198125      20.833801       3.680670       0.311341       0.187500   -9999.000000       0.204800   -9999.000000
53882     53882     shanxi         113.0667       36.0500           96       172     2012      09        07        251              0.194130      19.107941       0.000000       0.311006       0.182500       0.226400   -9999.000000       0.782000
53882     53882     shanxi         113.0667       36.0500           96       172     2012      09        08        252              0.185095      21.337067       1.353371       0.301338       0.169000       0.149200       0.200800       0.728000
53882     53882     shanxi         113.0667       36.0500           96       172     2012      09        09        253              0.178000      21.037109       0.000000       0.291897       0.162000   -9999.000000       0.098900       0.879000
53882     53882     shanxi         113.0667       36.0500           96       172     2012      09        10        254              0.178750      20.535736      12.395375       0.284892       0.240000       0.097500       0.166700       1.000000
53882     53882     shanxi         113.0667       36.0500           96       172     2012      09        11        255              0.221217      18.760468       0.809119       0.316862   -9999.000000       0.194200       0.138400   -9999.000000
53882     53882     shanxi         113.0667       36.0500           96       172     2012      09        12        256              0.215208      19.869843       0.000000       0.320670       0.141000       0.137400       0.160900       0.809000
53882     53882     shanxi         113.0667       36.0500           96       172     2012      09        13        257              0.205125      15.596405       0.000000       0.307367       0.153000       0.134800   -9999.000000       0.659000
53882     53882     shanxi         113.0667       36.0500           96       172     2012      09        14        258              0.196583      16.104218       0.000000       0.298035       0.152000   -9999.000000       0.125400       0.854000
53882     53882     shanxi         113.0667       36.0500           96       172     2012      09        15        259              0.187250      17.412354       0.379122       0.291793   -9999.000000       0.132800       0.123000       0.553000
53882     53882     shanxi         113.0667       36.0500           96       172     2012      09        16        260              0.180000      17.298950       0.000000       0.289426   -9999.000000   -9999.000000       0.153900   -9999.000000
53882     53882     shanxi         113.0667       36.0500           96       172     2012      09        17        261              0.173667      17.665100       0.000000       0.283976       0.118000       0.134100       0.179500       0.668000
53882     53882     shanxi         113.0667       36.0500           96       172     2012      09        18        262              0.169696      18.001831       1.692722       0.280097       0.177000       0.127400       0.187900       0.745000
53882     53882     shanxi         113.0667       36.0500           96       172     2012      09        19        263              0.164542      17.838196       1.426361       0.279879       0.164000   -9999.000000   -9999.000000       0.847000
53882     53882     shanxi         113.0667       36.0500           96       172     2012      09        20        264              0.161083      17.118805       0.683254       0.284700       0.166000   -9999.000000       0.111800       0.534000
53882     53882     shanxi         113.0667       36.0500           96       172     2012      09        21        265              0.158783      17.967926       0.628648       0.278707   -9999.000000       0.097200       0.196100   -9999.000000
53882     53882     shanxi         113.0667       36.0500           96       172     2012      09        22        266              0.159417      16.199188       0.000000       0.283865       0.164000       0.146500       0.162600       0.577000
53882     53882     shanxi         113.0667       36.0500           96       172     2012      09        23        267              0.159083      18.311829       0.000000       0.278123       0.159000       0.048600       0.192100       0.752000
53882     53882     shanxi         113.0667       36.0500           96       172     2012      09        24        268              0.160542      18.419556       0.000000       0.274589       0.157000   -9999.000000   -9999.000000       0.883000
53882     53882     shanxi         113.0667       36.0500           96       172     2012      09        25        269              0.159667      18.091339       6.659075       0.270529       0.173000   -9999.000000       0.163400       0.858000
53882     53882     shanxi         113.0667       36.0500           96       172     2012      09        26        270              0.163875      17.372467       0.550064       0.298242       0.147000       0.163300       0.103800   -9999.000000
53882     53882     shanxi         113.0667       36.0500           96       172     2012      09        27        271              0.168571      16.763245       0.000000       0.300627   -9999.000000   -9999.000000       0.153400       0.655000
53882     53882     shanxi         113.0667       36.0500           96       172     2012      09        28        272              0.163000      16.586945       0.000000       0.286174       0.129000   -9999.000000       0.135500   -9999.000000
53882     53882     shanxi         113.0667       36.0500           96       172     2012      09        29        273              0.161708      13.898834       0.000000       0.277280       0.168000   -9999.000000       0.160700       0.597000
53882     53882     shanxi         113.0667       36.0500           96       172     2012      09        30        274              0.160167      14.386505       0.115861       0.272507       0.153000       0.096000   -9999.000000   -9999.000000
53882     53882     shanxi         113.0667       36.0500           96       172     2012      10        01        275              0.158417      15.080505       0.000000       0.268784   -9999.000000       0.129700       0.094100   -9999.000000
53882     53882     shanxi         113.0667       36.0500           96       172     2012      10        02        276              0.157583      16.013397       0.000000       0.264375       0.134000   -9999.000000       0.124200       0.656000
53882     53882     shanxi         113.0667       36.0500           96       172     2012      10        03        277              0.155458      17.350250       0.000000       0.260370       0.125500       0.012500       0.102500   -9999.000000
53882     53882     shanxi         113.0667       36.0500           96       172     2012      10        04        278              0.153458      18.168549       4.559094       0.255577       0.149000       0.055100       0.119300       0.807000
53882     53882     shanxi         113.0667       36.0500           96       172     2012      10        05        279              0.156375      17.181641       0.519051       0.271931       0.147000       0.145900       0.139400   -9999.000000
53882     53882     shanxi         113.0667       36.0500           96       172     2012      10        06        280              0.156708      15.282318       0.000000       0.279475       0.144000   -9999.000000   -9999.000000       0.763000
53882     53882     shanxi         113.0667       36.0500           96       172     2012      10        07        281              0.156292      15.983124       0.000000       0.269379       0.140000   -9999.000000       0.055000       0.711000
53882     53882     shanxi         113.0667       36.0500           96       172     2012      10        08        282              0.154708      15.479462       0.027846       0.265966       0.147000       0.093300       0.099000       0.837000
53882     53882     shanxi         113.0667       36.0500           96       172     2012      10        09        283              0.151875      16.383240       0.000000       0.262937       0.123000       0.167700       0.087600       0.531000
53882     53882     shanxi         113.0667       36.0500           96       172     2012      10        10        284              0.149250      14.478790       0.000000       0.255046       0.145500   -9999.000000       0.108400   -9999.000000
53882     53882     shanxi         113.0667       36.0500           96       172     2012      10        11        285              0.148583      14.264130       0.000000       0.250482       0.112000   -9999.000000   -9999.000000       0.626000
53882     53882     shanxi         113.0667       36.0500           96       172     2012      10        12        286              0.147750      15.262207       0.000000       0.247859       0.119000   -9999.000000       0.086900       0.628000
53882     53882     shanxi         113.0667       36.0500           96       172     2012      10        13        287              0.146083      16.107849       0.000000       0.246843       0.113000       0.038300       0.064800       0.757000
53882     53882     shanxi         113.0667       36.0500           96       172     2012      10        14        288              0.145250      15.913483       0.103891       0.243423       0.113000       0.110300       0.101800       0.556000
53882     53882     shanxi         113.0667       36.0500           96       172     2012      10        15        289              0.144333      15.018921       0.473240       0.241733       0.130500   -9999.000000       0.078700   -9999.000000
53882     53882     shanxi         113.0667       36.0500           96       172     2012      10        16        290              0.143167      13.739136       0.077858       0.247280       0.124000       0.101500       0.091400       0.729000
53882     53882     shanxi         113.0667       36.0500           96       172     2012      10        17        291              0.142167      10.764832       0.000000       0.246411       0.118000   -9999.000000   -9999.000000       0.486000
53882     53882     shanxi         113.0667       36.0500           96       172     2012      10        18        292              0.143750      10.350281       0.191831       0.240512       0.113000   -9999.000000       0.057900       0.698000
53882     53882     shanxi         113.0667       36.0500           96       172     2012      10        19        293              0.144208      13.487030       0.000000       0.238678   -9999.000000       0.045200       0.085700       0.404000
53882     53882     shanxi         113.0667       36.0500           96       172     2012      10        20        294              0.144875      13.675720       0.000000       0.238440       0.118000   -9999.000000       0.073200   -9999.000000
53882     53882     shanxi         113.0667       36.0500           96       172     2012      10        21        295              0.147261      14.759277       6.485161       0.236412       0.139000   -9999.000000       0.097900       0.726000
53882     53882     shanxi         113.0667       36.0500           96       172     2012      10        22        296              0.155667      10.214417       0.071739       0.277643   -9999.000000   -9999.000000   -9999.000000       0.539000
53882     53882     shanxi         113.0667       36.0500           96       172     2012      10        23        297              0.154583       9.110535       0.000000       0.273382   -9999.000000   -9999.000000   -9999.000000       0.745000
53882     53882     shanxi         113.0667       36.0500           96       172     2012      10        24        298              0.154625       9.099670       0.000000       0.265918   -9999.000000       0.165800       0.032900       0.364000
53882     53882     shanxi         113.0667       36.0500           96       172     2012      10        25        299              0.000000      10.698181       0.000000       0.260775       0.111000   -9999.000000       0.080100   -9999.000000
53882     53882     shanxi         113.0667       36.0500           96       172     2012      10        26        300              0.149750      11.348785       0.450239       0.257090       0.132000       0.287100       0.068800       0.386000
53882     53882     shanxi         113.0667       36.0500           96       172     2012      10        27        301              0.150542       9.829498       0.000000       0.257679       0.127000       0.369900       0.082800   -9999.000000
53882     53882     shanxi         113.0667       36.0500           96       172     2012      10        28        302              0.000000      11.982239       0.159787       0.254119   -9999.000000   -9999.000000   -9999.000000       0.679000
53882     53882     shanxi         113.0667       36.0500           96       172     2012      10        29        303              0.147083      12.379333       0.000000       0.251704   -9999.000000       0.094900       0.058100   -9999.000000
53882     53882     shanxi         113.0667       36.0500           96       172     2012      10        30        304              0.145042      11.194733       0.000000       0.251225       0.113000   -9999.000000       0.047800   -9999.000000
53882     53882     shanxi         113.0667       36.0500           96       172     2012      10        31        305              0.143625       8.179993       8.728046       0.245740       0.137000   -9999.000000       0.070100       0.368000
53882     53882     shanxi         113.0667       36.0500           96       172     2012      11        01        306              0.143667       8.131683       0.000000       0.242490       0.114000   -9999.000000       0.061600   -9999.000000
53882     53882     shanxi         113.0667       36.0500           96       172     2012      11        02        307              0.142625       8.787231       3.821166       0.241418       0.119000   -9999.000000       0.075900       0.414000
53882     53882     shanxi         113.0667       36.0500           96       172     2012      11        03        308              0.142042      10.364319       0.119722       0.247943   -9999.000000       0.216400   -9999.000000   -9999.000000
53882     53882     shanxi         113.0667       36.0500           96       172     2012      11        04        309              0.141458       3.593262       0.000000       0.253916   -9999.000000       0.181300       0.041700       0.445000
53882     53882     shanxi         113.0667       36.0500           96       172     2012      11        05        310              0.142125       1.943970       0.000000       0.234417       0.122000   -9999.000000       0.065000       0.374000
53882     53882     shanxi         113.0667       36.0500           96       172     2012      11        06        311              0.144667       4.026093       0.000000       0.243539       0.134000       0.050000       0.055900       0.656000
53882     53882     shanxi         113.0667       36.0500           96       172     2012      11        07        312              0.144208       6.381470       0.000000       0.251996       0.132000   -9999.000000       0.068500       0.378000
53882     53882     shanxi         113.0667       36.0500           96       172     2012      11        08        313              0.144000       5.754303       0.000000       0.251871   -9999.000000   -9999.000000   -9999.000000   -9999.000000
53882     53882     shanxi         113.0667       36.0500           96       172     2012      11        09        314              0.143250       6.526398       0.123656       0.250161   -9999.000000       0.080000       0.075700       0.411000
53882     53882     shanxi         113.0667       36.0500           96       172     2012      11        10        315              0.146042       5.095154       1.420187       0.251592   -9999.000000       0.183000       0.028100       0.470000
53882     53882     shanxi         113.0667       36.0500           96       172     2012      11        11        316              0.144958       2.535522       0.000000       0.246535       0.134000       0.137300       0.061800       0.738000
53882     53882     shanxi         113.0667       36.0500           96       172     2012      11        12        317              0.144167       2.091858       0.000000       0.230400       0.115000   -9999.000000       0.055400       0.349000
53882     53882     shanxi         113.0667       36.0500           96       172     2012      11        13        318              0.000000       2.931854       0.000000       0.236564       0.118000   -9999.000000       0.067800   -9999.000000
53882     53882     shanxi         113.0667       36.0500           96       172     2012      11        14        319              0.146652       3.324280       0.000000       0.232958   -9999.000000       0.137900   -9999.000000       0.356000
53882     53882     shanxi         113.0667       36.0500           96       172     2012      11        15        320              0.148000       3.579559       0.992942       0.236598   -9999.000000   -9999.000000       0.041100       0.526000
53882     53882     shanxi         113.0667       36.0500           96       172     2012      11        16        321              0.147792       2.223938       0.000000       0.242910       0.128000       0.062900       0.044000       0.892000
53882     53882     shanxi         113.0667       36.0500           96       172     2012      11        17        322              0.000000       2.118469       0.000000       0.235480       0.119000   -9999.000000       0.044000       0.265000
53882     53882     shanxi         113.0667       36.0500           96       172     2012      11        18        323              0.148875       3.967896       0.000000       0.240594       0.120000   -9999.000000       0.064000   -9999.000000
53882     53882     shanxi         113.0667       36.0500           96       172     2012      11        19        324              0.148250       4.766174       0.000000       0.241547   -9999.000000       0.085000       0.061700       0.251000
53882     53882     shanxi         113.0667       36.0500           96       172     2012      11        20        325              0.149333       4.036835       0.000000       0.244933   -9999.000000   -9999.000000   -9999.000000       0.468000
53882     53882     shanxi         113.0667       36.0500           96       172     2012      11        21        326              0.149167       3.734100       0.000000       0.249354       0.094000       0.151700       0.018600       0.385000
53882     53882     shanxi         113.0667       36.0500           96       172     2012      11        22        327              0.147917       4.671021       0.000000       0.250300       0.108000   -9999.000000       0.051800       0.209000
53882     53882     shanxi         113.0667       36.0500           96       172     2012      11        23        328              0.144958       3.615021       0.000000       0.240390       0.097000   -9999.000000       0.041400   -9999.000000
53882     53882     shanxi         113.0667       36.0500           96       172     2012      11        24        329              0.143500       1.317627       0.000000       0.217914   -9999.000000       0.112900       0.058800       0.202000
53882     53882     shanxi         113.0667       36.0500           96       172     2012      11        25        330              0.144042       2.295563       0.358481       0.232076   -9999.000000   -9999.000000   -9999.000000   -9999.000000
53882     53882     shanxi         113.0667       36.0500           96       172     2012      11        26        331              0.140667       1.448669       0.000000       0.224153       0.094000   -9999.000000   -9999.000000       0.196000
53882     53882     shanxi         113.0667       36.0500           96       172     2012      11        27        332              0.141667       0.636261       0.000000       0.210648       0.106000   -9999.000000       0.030800   -9999.000000
53882     53882     shanxi         113.0667       36.0500           96       172     2012      11        28        333              0.140083       2.268616       0.000000       0.221547       0.099000       0.126700       0.056900   -9999.000000
53882     53882     shanxi         113.0667       36.0500           96       172     2012      11        29        334              0.137375       0.214783       0.000000       0.206248       0.102000       0.076400       0.042100       0.197000
53882     53882     shanxi         113.0667       36.0500           96       172     2012      11        30        335              0.134083      -0.232117       0.000000       0.200658   -9999.000000   -9999.000000       0.061400   -9999.000000
53882     53882     shanxi         113.0667       36.0500           96       172     2012      12        01        336              0.127333      -0.073334       0.698929       0.199821   -9999.000000   -9999.000000   -9999.000000       0.160000
53882     53882     shanxi         113.0667       36.0500           96       172     2012      12        02        337              0.122417      -2.103394       0.000000       0.183393       0.104000       0.181400       0.033700   -9999.000000
53882     53882     shanxi         113.0667       36.0500           96       172     2012      12        03        338              0.120875      -0.545746       0.000000       0.194528       0.098000   -9999.000000       0.051600       0.211000
53882     53882     shanxi         113.0667       36.0500           96       172     2012      12        04        339              0.127250      -1.411652       0.000000       0.192339       0.100000       0.119700       0.036600       0.255000
53882     53882     shanxi         113.0667       36.0500           96       172     2012      12        05        340              0.119708       0.720367       0.000000       0.205818   -9999.000000   -9999.000000       0.052200       0.440000
53882     53882     shanxi         113.0667       36.0500           96       172     2012      12        06        341              0.120542      -2.003876       0.000000       0.187301   -9999.000000   -9999.000000   -9999.000000       0.237000
53882     53882     shanxi         113.0667       36.0500           96       172     2012      12        07        342              0.117833       0.206573       0.000000       0.200203   -9999.000000       0.080300   -9999.000000   -9999.000000
53882     53882     shanxi         113.0667       36.0500           96       172     2012      12        08        343              0.108375      -1.416138       0.000000       0.190972       0.096000       0.100600       0.010000       0.207000
53882     53882     shanxi         113.0667       36.0500           96       172     2012      12        09        344              0.107417      -3.048523       0.000000       0.179657       0.096000       0.121000       0.047900       0.110000
53882     53882     shanxi         113.0667       36.0500           96       172     2012      12        10        345              0.108000      -2.193817       0.000000       0.182976       0.098000   -9999.000000       0.029300       0.454000
53882     53882     shanxi         113.0667       36.0500           96       172     2012      12        11        346              0.102958      -2.037292       0.000000       0.186185   -9999.000000       0.143700       0.046000       0.066000
53882     53882     shanxi         113.0667       36.0500           96       172     2012      12        12        347              0.104458      -3.722900       0.000000       0.172873   -9999.000000       0.039600   -9999.000000   -9999.000000
53882     53882     shanxi         113.0667       36.0500           96       172     2012      12        13        348              0.107583      -2.123383       3.220594       0.179455   -9999.000000   -9999.000000       0.033100       0.157000
53882     53882     shanxi         113.0667       36.0500           96       172     2012      12        14        349              0.109750      -2.550323       0.000000       0.176315       0.101000       0.134100       0.021500       0.162000
53882     53882     shanxi         113.0667       36.0500           96       172     2012      12        15        350              0.000000      -2.316132       0.000000       0.183639   -9999.000000       0.078200       0.043300       0.362000
53882     53882     shanxi         113.0667       36.0500           96       172     2012      12        16        351              0.113417      -2.914398       0.203154       0.167196   -9999.000000       0.103400   -9999.000000       0.254000
53882     53882     shanxi         113.0667       36.0500           96       172     2012      12        17        352              0.112583      -1.309723       0.000000       0.189936   -9999.000000       0.012500       0.047800   -9999.000000
53882     53882     shanxi         113.0667       36.0500           96       172     2012      12        18        353              0.108875      -1.199860       0.000000       0.195923   -9999.000000   -9999.000000   -9999.000000       0.060000
53882     53882     shanxi         113.0667       36.0500           96       172     2012      12        19        354              0.107500      -2.214203       0.289948       0.183910   -9999.000000   -9999.000000       0.017700       0.121000
53882     53882     shanxi         113.0667       36.0500           96       172     2012      12        20        355              0.000000      -2.772705       1.683823       0.173025   -9999.000000       0.156200       0.038000       0.345000
53882     53882     shanxi         113.0667       36.0500           96       172     2012      12        21        356              0.109417      -3.533295       0.000000       0.162524   -9999.000000       0.193500       0.026400       0.037000
53882     53882     shanxi         113.0667       36.0500           96       172     2012      12        22        357              0.105250      -4.133484       0.000000       0.169984   -9999.000000       0.048600       0.035800   -9999.000000
53882     53882     shanxi         113.0667       36.0500           96       172     2012      12        23        358              0.101292      -7.006042       0.000000       0.153132   -9999.000000   -9999.000000   -9999.000000       0.017000
53882     53882     shanxi         113.0667       36.0500           96       172     2012      12        24        359              0.100500      -9.501373       0.000000       0.145881   -9999.000000       0.111400       0.034000   -9999.000000
53882     53882     shanxi         113.0667       36.0500           96       172     2012      12        25        360              0.100667      -7.086365       0.000000       0.146081   -9999.000000       0.028000       0.010000       0.123000
53882     53882     shanxi         113.0667       36.0500           96       172     2012      12        26        361              0.000000      -5.758423       0.000000       0.153386   -9999.000000       0.118400       0.034600   -9999.000000
53882     53882     shanxi         113.0667       36.0500           96       172     2012      12        27        362              0.101833      -5.929962       0.000000       0.150372   -9999.000000       0.021600       0.025200   -9999.000000
53882     53882     shanxi         113.0667       36.0500           96       172     2012      12        28        363              0.103000      -4.354065       0.000000       0.154757   -9999.000000       0.160700       0.039300       0.049000
53882     53882     shanxi         113.0667       36.0500           96       172     2012      12        29        364              0.000000      -3.590424       0.000000       0.166728   -9999.000000       0.147500   -9999.000000   -9999.000000
53882     53882     shanxi         113.0667       36.0500           96       172     2012      12        30        365              0.000000      -8.722992       0.000000       0.150656   -9999.000000   -9999.000000       0.024300       0.063000
53882     53882     shanxi         113.0667       36.0500           96       172     2012      12        31        366              0.096933      -6.870636       0.000000       0.148146   -9999.000000   -9999.000000       0.020800   -9999.000000
