# Supplementary material for: Research on Fusing Multisatellite Soil Moisture Data Based on Bayesian Model Averaging
Source: Hindawi journal article supplement (doi:10.1155/2018/9310838), 2018-06-25
Supplement: f1 [file 9310838.f1.zip › 2012_sm00-10cm_daily_ZDB_ZHY_53884_366days_allin.txt]

53884     53884     shanxi         113.0247       36.5081           94       172     2012      01        01        001              0.000000   -9999.000000       1.157688   -9999.000000       0.081000   -9999.000000       0.021600   -9999.000000
53884     53884     shanxi         113.0247       36.5081           94       172     2012      01        02        002              0.017708      -4.467560       1.380604       0.168604   -9999.000000       0.082700       0.029200       0.133000
53884     53884     shanxi         113.0247       36.5081           94       172     2012      01        03        003              0.000000      -4.919067       0.429356       0.163623   -9999.000000       0.150900   -9999.000000       0.084000
53884     53884     shanxi         113.0247       36.5081           94       172     2012      01        04        004              0.015042      -6.934418       0.782957       0.151204   -9999.000000       0.139000       0.021800   -9999.000000
53884     53884     shanxi         113.0247       36.5081           94       172     2012      01        05        005              0.014708      -8.149719       1.439112       0.149867   -9999.000000   -9999.000000       0.025900       0.030000
53884     53884     shanxi         113.0247       36.5081           94       172     2012      01        06        006              0.015208      -6.784454       2.153656       0.157137   -9999.000000   -9999.000000       0.024300       0.049000
53884     53884     shanxi         113.0247       36.5081           94       172     2012      01        07        007              0.016083      -6.277069       2.641678       0.159452   -9999.000000       0.059900       0.025300       0.100000
53884     53884     shanxi         113.0247       36.5081           94       172     2012      01        08        008              0.000000      -5.648804       0.000000       0.153944   -9999.000000       0.106000       0.025700   -9999.000000
53884     53884     shanxi         113.0247       36.5081           94       172     2012      01        09        009              0.017292      -5.029449       0.000000       0.164348       0.088000       0.511800   -9999.000000   -9999.000000
53884     53884     shanxi         113.0247       36.5081           94       172     2012      01        10        010              0.017042      -3.647858       0.000000       0.184027   -9999.000000       0.026000       0.015600       0.042000
53884     53884     shanxi         113.0247       36.5081           94       172     2012      01        11        011              0.015958      -4.263519       0.000000       0.178132   -9999.000000   -9999.000000       0.020800   -9999.000000
53884     53884     shanxi         113.0247       36.5081           94       172     2012      01        12        012              0.015542      -5.282623       0.312255       0.167332       0.088000       0.100300       0.019600       0.041000
53884     53884     shanxi         113.0247       36.5081           94       172     2012      01        13        013              0.016292      -4.726715       0.592732       0.173140       0.092000   -9999.000000       0.021000       0.021000
53884     53884     shanxi         113.0247       36.5081           94       172     2012      01        14        014              0.016708      -3.435028       1.069501       0.183147   -9999.000000   -9999.000000   -9999.000000   -9999.000000
53884     53884     shanxi         113.0247       36.5081           94       172     2012      01        15        015              0.017375      -3.283051       0.000000       0.182431   -9999.000000       0.118800       0.023500       0.012000
53884     53884     shanxi         113.0247       36.5081           94       172     2012      01        16        016              0.017333      -3.739014       0.609912       0.174737   -9999.000000       0.060900       0.017900   -9999.000000
53884     53884     shanxi         113.0247       36.5081           94       172     2012      01        17        017              0.000000      -4.580353       0.217086       0.168757       0.084000   -9999.000000       0.020000       0.042000
53884     53884     shanxi         113.0247       36.5081           94       172     2012      01        18        018              0.018250      -2.664246       0.597117       0.185747       0.094000       0.039600       0.019100   -9999.000000
53884     53884     shanxi         113.0247       36.5081           94       172     2012      01        19        019              0.019250      -2.500031       0.831543       0.185842   -9999.000000   -9999.000000       0.020300       0.047000
53884     53884     shanxi         113.0247       36.5081           94       172     2012      01        20        020              0.019083      -3.390533       0.802088       0.170014   -9999.000000   -9999.000000   -9999.000000       0.043000
53884     53884     shanxi         113.0247       36.5081           94       172     2012      01        21        021              0.017292      -4.793457       0.288611       0.163896   -9999.000000   -9999.000000       0.015900       0.011000
53884     53884     shanxi         113.0247       36.5081           94       172     2012      01        22        022              0.016333      -7.754486       0.659604       0.151312   -9999.000000       0.111600       0.014900       0.052000
53884     53884     shanxi         113.0247       36.5081           94       172     2012      01        23        023              0.014750      -8.464294       0.488441       0.147150   -9999.000000   -9999.000000       0.015700   -9999.000000
53884     53884     shanxi         113.0247       36.5081           94       172     2012      01        24        024              0.014000      -9.000946       0.593468       0.144939   -9999.000000   -9999.000000   -9999.000000       0.016000
53884     53884     shanxi         113.0247       36.5081           94       172     2012      01        25        025              0.014000      -9.198151       1.210233       0.144519   -9999.000000       0.007200       0.019000       0.034000
53884     53884     shanxi         113.0247       36.5081           94       172     2012      01        26        026              0.014958      -7.942047       0.246919       0.150824   -9999.000000   -9999.000000   -9999.000000       0.050000
53884     53884     shanxi         113.0247       36.5081           94       172     2012      01        27        027              0.015583      -5.349792       0.000000       0.170354       0.095000   -9999.000000       0.014200       0.008000
53884     53884     shanxi         113.0247       36.5081           94       172     2012      01        28        028              0.016750      -3.985809       0.000000       0.180513       0.104000       0.027100       0.020200   -9999.000000
53884     53884     shanxi         113.0247       36.5081           94       172     2012      01        29        029              0.016958      -2.965790       0.297720       0.190694   -9999.000000   -9999.000000       0.019500       0.008000
53884     53884     shanxi         113.0247       36.5081           94       172     2012      01        30        030              0.017625      -3.893890       0.944234       0.170390       0.103000       0.098700       0.021700       0.089000
53884     53884     shanxi         113.0247       36.5081           94       172     2012      01        31        031              0.018375      -3.604004       0.000000       0.182780   -9999.000000   -9999.000000   -9999.000000       0.089000
53884     53884     shanxi         113.0247       36.5081           94       172     2012      02        01        032              0.017000      -1.706055       0.000000       0.203841   -9999.000000   -9999.000000       0.021000       0.041000
53884     53884     shanxi         113.0247       36.5081           94       172     2012      02        02        033              0.016167      -4.603394       0.000000       0.177401       0.089000       0.048100       0.019000   -9999.000000
53884     53884     shanxi         113.0247       36.5081           94       172     2012      02        03        034              0.017125      -4.935852       0.000000       0.170906       0.097000   -9999.000000       0.022100       0.017000
53884     53884     shanxi         113.0247       36.5081           94       172     2012      02        04        035              0.018125      -2.889984       0.000000       0.188336   -9999.000000   -9999.000000       0.021600       0.065000
53884     53884     shanxi         113.0247       36.5081           94       172     2012      02        05        036              0.020458      -2.151398       0.000000       0.192507   -9999.000000   -9999.000000       0.026900       0.093000
53884     53884     shanxi         113.0247       36.5081           94       172     2012      02        06        037              0.018583      -0.717102       0.000000       0.212973   -9999.000000   -9999.000000   -9999.000000       0.015000
53884     53884     shanxi         113.0247       36.5081           94       172     2012      02        07        038              0.016917      -3.647736       0.000000       0.192336       0.088000       0.062600       0.019100   -9999.000000
53884     53884     shanxi         113.0247       36.5081           94       172     2012      02        08        039              0.015125      -5.819153       0.000000       0.162364   -9999.000000   -9999.000000       0.024600       0.017000
53884     53884     shanxi         113.0247       36.5081           94       172     2012      02        09        040              0.016083      -6.985931       0.000000       0.150650   -9999.000000       0.105600       0.023600   -9999.000000
53884     53884     shanxi         113.0247       36.5081           94       172     2012      02        10        041              0.017250      -5.425018       0.000000       0.158117   -9999.000000   -9999.000000       0.025900       0.111000
53884     53884     shanxi         113.0247       36.5081           94       172     2012      02        11        042              0.018875      -4.366119       0.000000       0.182778   -9999.000000   -9999.000000       0.028000       0.024000
53884     53884     shanxi         113.0247       36.5081           94       172     2012      02        12        043              0.019375      -1.443939       0.000000       0.199418   -9999.000000   -9999.000000   -9999.000000   -9999.000000
53884     53884     shanxi         113.0247       36.5081           94       172     2012      02        13        044              0.018500      -2.956635       0.000000       0.186524       0.092000       0.082900   -9999.000000       0.018000
53884     53884     shanxi         113.0247       36.5081           94       172     2012      02        14        045              0.021000      -2.575775       0.000000       0.188894   -9999.000000   -9999.000000       0.028900   -9999.000000
53884     53884     shanxi         113.0247       36.5081           94       172     2012      02        15        046              0.021583      -0.649506       0.000000       0.211347       0.094000   -9999.000000       0.028500       0.062000
53884     53884     shanxi         113.0247       36.5081           94       172     2012      02        16        047              0.020417      -0.733551       0.000000       0.213522   -9999.000000   -9999.000000       0.028700   -9999.000000
53884     53884     shanxi         113.0247       36.5081           94       172     2012      02        17        048              0.018917      -2.667511       0.000000       0.197740       0.089000       0.100700   -9999.000000       0.096000
53884     53884     shanxi         113.0247       36.5081           94       172     2012      02        18        049              0.018542      -4.042358       0.000000       0.185267       0.097000   -9999.000000       0.027500       0.100000
53884     53884     shanxi         113.0247       36.5081           94       172     2012      02        19        050              0.019583      -4.268280       0.000000       0.186524       0.091000   -9999.000000       0.024200       0.115000
53884     53884     shanxi         113.0247       36.5081           94       172     2012      02        20        051              0.022833      -1.728058       0.000000       0.199280       0.086000   -9999.000000       0.029700       0.212000
53884     53884     shanxi         113.0247       36.5081           94       172     2012      02        21        052              0.025417       1.144958       0.000000       0.226372   -9999.000000       0.217000   -9999.000000   -9999.000000
53884     53884     shanxi         113.0247       36.5081           94       172     2012      02        22        053              0.028958       1.817505       0.000000       0.233102   -9999.000000   -9999.000000       0.037800       0.113000
53884     53884     shanxi         113.0247       36.5081           94       172     2012      02        23        054              0.031833       3.249420       0.000000       0.248593       0.079000       0.062800   -9999.000000       0.208000
53884     53884     shanxi         113.0247       36.5081           94       172     2012      02        24        055              0.033833       1.258728       0.000000       0.229545       0.084000   -9999.000000       0.023700       0.242000
53884     53884     shanxi         113.0247       36.5081           94       172     2012      02        25        056              0.032542       1.473907       0.000000       0.239118   -9999.000000   -9999.000000       0.028000       0.015000
53884     53884     shanxi         113.0247       36.5081           94       172     2012      02        26        057              0.030125      -0.938446       0.000000       0.205499   -9999.000000       0.226200       0.029200   -9999.000000
53884     53884     shanxi         113.0247       36.5081           94       172     2012      02        27        058              0.031292      -0.399719       0.000000       0.214018   -9999.000000   -9999.000000   -9999.000000       0.168000
53884     53884     shanxi         113.0247       36.5081           94       172     2012      02        28        059              0.033792       0.784760       0.000000       0.224145       0.079000       0.025000       0.034000       0.154000
53884     53884     shanxi         113.0247       36.5081           94       172     2012      02        29        060              0.000000   -9999.000000       0.000000   -9999.000000       0.087000   -9999.000000   -9999.000000   -9999.000000
53884     53884     shanxi         113.0247       36.5081           94       172     2012      03        01        061              0.039583       1.717377       0.000000       0.233032   -9999.000000   -9999.000000       0.018900       0.248000
53884     53884     shanxi         113.0247       36.5081           94       172     2012      03        02        062              0.042333       1.178802       0.000000       0.237410   -9999.000000   -9999.000000       0.028000   -9999.000000
53884     53884     shanxi         113.0247       36.5081           94       172     2012      03        03        063              0.040500       0.670166       0.000000       0.227668   -9999.000000   -9999.000000       0.029500       0.111000
53884     53884     shanxi         113.0247       36.5081           94       172     2012      03        04        064              0.043250      -0.127808       0.000000       0.213904       0.113000       0.099500       0.043100       0.237000
53884     53884     shanxi         113.0247       36.5081           94       172     2012      03        05        065              0.047750       1.330139       0.000000       0.231637       0.122000   -9999.000000   -9999.000000       0.553000
53884     53884     shanxi         113.0247       36.5081           94       172     2012      03        06        066              0.045208       1.563141       0.000000       0.231548       0.114000   -9999.000000       0.028700       0.147000
53884     53884     shanxi         113.0247       36.5081           94       172     2012      03        07        067              0.000000       1.027130       0.000000       0.225626       0.111000       0.005200       0.029900   -9999.000000
53884     53884     shanxi         113.0247       36.5081           94       172     2012      03        08        068              0.046875       3.936615       0.000000       0.247941   -9999.000000   -9999.000000       0.033100       0.159000
53884     53884     shanxi         113.0247       36.5081           94       172     2012      03        09        069              0.047667       2.434784       0.000000       0.237686   -9999.000000   -9999.000000       0.035700   -9999.000000
53884     53884     shanxi         113.0247       36.5081           94       172     2012      03        10        070              0.048458       3.117493       0.000000       0.241085       0.103000   -9999.000000       0.040800       0.148000
53884     53884     shanxi         113.0247       36.5081           94       172     2012      03        11        071              0.047708       4.261475       0.000000       0.242283       0.097000   -9999.000000   -9999.000000       0.162000
53884     53884     shanxi         113.0247       36.5081           94       172     2012      03        12        072              0.080625       2.722107       0.000000       0.230702       0.099000       0.151400       0.024700   -9999.000000
53884     53884     shanxi         113.0247       36.5081           94       172     2012      03        13        073              0.087583       3.195190       0.000000       0.233375   -9999.000000   -9999.000000       0.033100       0.190000
53884     53884     shanxi         113.0247       36.5081           94       172     2012      03        14        074              0.086000       5.668854       0.000000       0.244085   -9999.000000   -9999.000000   -9999.000000   -9999.000000
53884     53884     shanxi         113.0247       36.5081           94       172     2012      03        15        075              0.084125       5.641754       0.145776       0.244204       0.093000       0.233100       0.043800       0.231000
53884     53884     shanxi         113.0247       36.5081           94       172     2012      03        16        076              0.084917       2.913696       0.000000       0.246339       0.101000   -9999.000000       0.039700   -9999.000000
53884     53884     shanxi         113.0247       36.5081           94       172     2012      03        17        077              0.084250       6.514191       0.000000       0.250621       0.092000       0.029500       0.035700       0.275000
53884     53884     shanxi         113.0247       36.5081           94       172     2012      03        18        078              0.114375       9.109009       0.043747       0.257852   -9999.000000   -9999.000000       0.028300       0.213000
53884     53884     shanxi         113.0247       36.5081           94       172     2012      03        19        079              0.116375       5.596405       1.509221       0.244774   -9999.000000   -9999.000000       0.040400       0.275000
53884     53884     shanxi         113.0247       36.5081           94       172     2012      03        20        080              0.124708       1.935181       1.932779       0.238554       0.098000       0.180700       0.046200       0.310000
53884     53884     shanxi         113.0247       36.5081           94       172     2012      03        21        081              0.129958       5.276428       0.914650       0.254083   -9999.000000   -9999.000000       0.056300   -9999.000000
53884     53884     shanxi         113.0247       36.5081           94       172     2012      03        22        082              0.150125       2.135529       3.273935       0.245939   -9999.000000       0.134100   -9999.000000       0.567000
53884     53884     shanxi         113.0247       36.5081           94       172     2012      03        23        083              0.137667       2.998260       0.529564       0.253596       0.107000   -9999.000000       0.034100       0.228000
53884     53884     shanxi         113.0247       36.5081           94       172     2012      03        24        084              0.126625       4.507599       0.000000       0.241656   -9999.000000   -9999.000000   -9999.000000       0.486000
53884     53884     shanxi         113.0247       36.5081           94       172     2012      03        25        085              0.000000       7.583344       0.000000       0.244955       0.096000       0.079000       0.039800       0.348000
53884     53884     shanxi         113.0247       36.5081           94       172     2012      03        26        086              0.123417       9.257874       0.000000       0.246368       0.101000   -9999.000000       0.039400   -9999.000000
53884     53884     shanxi         113.0247       36.5081           94       172     2012      03        27        087              0.122667      10.484467       0.000000       0.241549       0.085000       0.228400       0.046200       0.355000
53884     53884     shanxi         113.0247       36.5081           94       172     2012      03        28        088              0.127750      11.331543       0.105657       0.236316       0.093000   -9999.000000   -9999.000000       0.411000
53884     53884     shanxi         113.0247       36.5081           94       172     2012      03        29        089              0.129625      11.941711       0.000000       0.234636       0.088000   -9999.000000       0.031300       0.409000
53884     53884     shanxi         113.0247       36.5081           94       172     2012      03        30        090              0.125208      12.950500       0.491570       0.231381   -9999.000000       0.030200       0.038600       0.092000
53884     53884     shanxi         113.0247       36.5081           94       172     2012      03        31        091              0.124875       7.394501       0.000000       0.227510       0.076000   -9999.000000       0.032100   -9999.000000
53884     53884     shanxi         113.0247       36.5081           94       172     2012      04        01        092              0.124500      11.195709       0.000000       0.223975       0.092000       0.089500       0.041200       0.181000
53884     53884     shanxi         113.0247       36.5081           94       172     2012      04        02        093              0.118833      12.746796       1.364788       0.219369       0.090000       0.309900   -9999.000000       0.226000
53884     53884     shanxi         113.0247       36.5081           94       172     2012      04        03        094              0.120708       6.276917       0.000000       0.218627   -9999.000000   -9999.000000       0.045600       0.263000
53884     53884     shanxi         113.0247       36.5081           94       172     2012      04        04        095              0.121208       9.635345       0.205368       0.219539   -9999.000000       0.038800       0.031800       0.093000
53884     53884     shanxi         113.0247       36.5081           94       172     2012      04        05        096              0.120458      12.459381       0.000000       0.213802       0.080000   -9999.000000       0.042100   -9999.000000
53884     53884     shanxi         113.0247       36.5081           94       172     2012      04        06        097              0.119792      12.946625       0.000000       0.208266       0.086000   -9999.000000       0.035400       0.063000
53884     53884     shanxi         113.0247       36.5081           94       172     2012      04        07        098              0.119667      13.507019       0.154323       0.203927       0.083000       0.142300       0.041600   -9999.000000
53884     53884     shanxi         113.0247       36.5081           94       172     2012      04        08        099              0.120167      14.906403       0.113639       0.200216   -9999.000000   -9999.000000   -9999.000000       0.182000
53884     53884     shanxi         113.0247       36.5081           94       172     2012      04        09        100              0.119375      16.882294       0.796119       0.197127       0.117000       0.016500       0.053100   -9999.000000
53884     53884     shanxi         113.0247       36.5081           94       172     2012      04        10        101              0.125250      15.517914       0.123554       0.198332       0.094000   -9999.000000       0.051300   -9999.000000
53884     53884     shanxi         113.0247       36.5081           94       172     2012      04        11        102              0.128250      15.365082       4.054558       0.201786       0.100000   -9999.000000       0.069200       0.178000
53884     53884     shanxi         113.0247       36.5081           94       172     2012      04        12        103              0.137083      15.404175       0.210777       0.219101       0.116000   -9999.000000       0.056100   -9999.000000
53884     53884     shanxi         113.0247       36.5081           94       172     2012      04        13        104              0.130042      11.458313       0.000000       0.243959       0.102000   -9999.000000       0.052500       0.185000
53884     53884     shanxi         113.0247       36.5081           94       172     2012      04        14        105              0.123958      15.041321       0.000000       0.225055       0.096000   -9999.000000   -9999.000000   -9999.000000
53884     53884     shanxi         113.0247       36.5081           94       172     2012      04        15        106              0.123625      14.859192       0.000000       0.214766       0.086000   -9999.000000       0.036100       0.165000
53884     53884     shanxi         113.0247       36.5081           94       172     2012      04        16        107              0.120833      16.772614       0.000000       0.204835       0.090000       0.255700       0.046900       0.209000
53884     53884     shanxi         113.0247       36.5081           94       172     2012      04        17        108              0.120292      16.462646       0.060993       0.199028       0.081000       0.119000       0.040700       0.324000
53884     53884     shanxi         113.0247       36.5081           94       172     2012      04        18        109              0.120625      17.123108       0.594971       0.196593       0.086000   -9999.000000   -9999.000000       0.240000
53884     53884     shanxi         113.0247       36.5081           94       172     2012      04        19        110              0.121167      18.000397       2.011600       0.197776       0.092000   -9999.000000   -9999.000000   -9999.000000
53884     53884     shanxi         113.0247       36.5081           94       172     2012      04        20        111              0.119875      17.434570       5.260923       0.217225       0.110000       0.285000       0.053900       0.123000
53884     53884     shanxi         113.0247       36.5081           94       172     2012      04        21        112              0.121000      15.365448       0.207233       0.246629       0.101000       0.214700       0.036600       0.160000
53884     53884     shanxi         113.0247       36.5081           94       172     2012      04        22        113              0.123750      17.137939       0.464024       0.251889       0.090000       0.016200       0.048200       0.307000
53884     53884     shanxi         113.0247       36.5081           94       172     2012      04        23        114              0.125333      19.915100       2.898950       0.233503       0.094000   -9999.000000       0.043300       0.344000
53884     53884     shanxi         113.0247       36.5081           94       172     2012      04        24        115              0.127583      22.298676       0.965918       0.233609   -9999.000000   -9999.000000       0.084200   -9999.000000
53884     53884     shanxi         113.0247       36.5081           94       172     2012      04        25        116              0.000000      12.284058       0.000000       0.258323   -9999.000000       0.193300   -9999.000000       0.580000
53884     53884     shanxi         113.0247       36.5081           94       172     2012      04        26        117              0.125708      13.098236       0.000000       0.236361       0.088500       0.257400       0.047700       0.195000
53884     53884     shanxi         113.0247       36.5081           94       172     2012      04        27        118              0.126500      18.199127       0.000000       0.219045       0.089000       0.041600   -9999.000000       0.269000
53884     53884     shanxi         113.0247       36.5081           94       172     2012      04        28        119              0.124125      19.661682       0.599675       0.204241       0.082000   -9999.000000       0.052900       0.138000
53884     53884     shanxi         113.0247       36.5081           94       172     2012      04        29        120              0.124250      19.509857       0.000000       0.199464   -9999.000000       0.122800       0.042700   -9999.000000
53884     53884     shanxi         113.0247       36.5081           94       172     2012      04        30        121              0.123792      20.749054       1.706250       0.194104       0.089000       0.148900       0.050900       0.125000
53884     53884     shanxi         113.0247       36.5081           94       172     2012      05        01        122              0.123875      21.758484       0.000000       0.190224       0.106500   -9999.000000   -9999.000000       0.335000
53884     53884     shanxi         113.0247       36.5081           94       172     2012      05        02        123              0.124375      21.081848       0.000000       0.187948       0.112000       0.180000       0.039900       0.257000
53884     53884     shanxi         113.0247       36.5081           94       172     2012      05        03        124              0.125292      22.434570       0.000000       0.185520       0.100000   -9999.000000       0.053600       0.156000
53884     53884     shanxi         113.0247       36.5081           94       172     2012      05        04        125              0.124708      23.002563       0.194230       0.181263       0.102000   -9999.000000       0.041600   -9999.000000
53884     53884     shanxi         113.0247       36.5081           94       172     2012      05        05        126              0.122875      24.113251       0.000000       0.179104       0.109000   -9999.000000       0.051900       0.130000
53884     53884     shanxi         113.0247       36.5081           94       172     2012      05        06        127              0.123375      24.596680       1.613698       0.177501       0.101000   -9999.000000   -9999.000000   -9999.000000
53884     53884     shanxi         113.0247       36.5081           94       172     2012      05        07        128              0.121542      26.168121       0.000000       0.175978   -9999.000000       0.138300       0.058500       0.266000
53884     53884     shanxi         113.0247       36.5081           94       172     2012      05        08        129              0.120792      24.655701       0.600093       0.176045       0.105000   -9999.000000       0.054200       0.296000
53884     53884     shanxi         113.0247       36.5081           94       172     2012      05        09        130              0.118542      24.848999       0.446355       0.177539       0.111000   -9999.000000       0.060600   -9999.000000
53884     53884     shanxi         113.0247       36.5081           94       172     2012      05        10        131              0.119833      23.440338       0.096118       0.178353       0.112000   -9999.000000       0.050100       0.240000
53884     53884     shanxi         113.0247       36.5081           94       172     2012      05        11        132              0.116500      26.009705       2.284507       0.176233       0.162000   -9999.000000       0.057800   -9999.000000
53884     53884     shanxi         113.0247       36.5081           94       172     2012      05        12        133              0.111333      22.001770       0.096444       0.196383       0.112500   -9999.000000   -9999.000000       0.143000
53884     53884     shanxi         113.0247       36.5081           94       172     2012      05        13        134              0.113750      16.395599       0.000000       0.202972       0.110500       0.178000       0.046200   -9999.000000
53884     53884     shanxi         113.0247       36.5081           94       172     2012      05        14        135              0.112333      19.373383       0.000000       0.188003       0.110000   -9999.000000       0.073600       0.091000
53884     53884     shanxi         113.0247       36.5081           94       172     2012      05        15        136              0.110917      18.959869       0.000000       0.179112       0.109000       0.032600       0.061100       0.322000
53884     53884     shanxi         113.0247       36.5081           94       172     2012      05        16        137              0.109542      19.938416       3.340946       0.175111       0.106000   -9999.000000       0.066000       0.300000
53884     53884     shanxi         113.0247       36.5081           94       172     2012      05        17        138              0.110792      20.634796       0.000000       0.173048       0.102500       0.023300       0.069300       0.261000
53884     53884     shanxi         113.0247       36.5081           94       172     2012      05        18        139              0.109917      24.030914       0.039473       0.171468       0.111500   -9999.000000   -9999.000000   -9999.000000
53884     53884     shanxi         113.0247       36.5081           94       172     2012      05        19        140              0.107583      25.234070       0.280765       0.171321       0.115000   -9999.000000       0.053500       0.199000
53884     53884     shanxi         113.0247       36.5081           94       172     2012      05        20        141              0.107208      24.622070       0.271911       0.174690       0.093000       0.050300       0.071700       0.324000
53884     53884     shanxi         113.0247       36.5081           94       172     2012      05        21        142              0.099833      25.324554       0.525432       0.172790       0.154000       0.149600       0.045300       0.252000
53884     53884     shanxi         113.0247       36.5081           94       172     2012      05        22        143              0.101375      18.983521       0.231021       0.178863       0.132500       0.276600       0.051000       0.176000
53884     53884     shanxi         113.0247       36.5081           94       172     2012      05        23        144              0.113667      20.315735      10.237674       0.183499   -9999.000000       0.091000   -9999.000000   -9999.000000
53884     53884     shanxi         113.0247       36.5081           94       172     2012      05        24        145              0.129375      20.277191       0.333990       0.241448       0.150000   -9999.000000       0.054500       0.803000
53884     53884     shanxi         113.0247       36.5081           94       172     2012      05        25        146              0.000000      19.017365       0.000000       0.256638       0.137000   -9999.000000       0.044500       0.302000
53884     53884     shanxi         113.0247       36.5081           94       172     2012      05        26        147              0.117208      21.203278       2.730905       0.228635       0.132000       0.334900       0.053000       0.296000
53884     53884     shanxi         113.0247       36.5081           94       172     2012      05        27        148              0.116250      21.930145       0.000000       0.209328       0.147000   -9999.000000       0.041000       0.204000
53884     53884     shanxi         113.0247       36.5081           94       172     2012      05        28        149              0.113250      24.345703       0.921602       0.193133       0.120500       0.073500       0.050100   -9999.000000
53884     53884     shanxi         113.0247       36.5081           94       172     2012      05        29        150              0.108042      24.237061       0.232415       0.186656       0.150000   -9999.000000   -9999.000000       0.150000
53884     53884     shanxi         113.0247       36.5081           94       172     2012      05        30        151              0.108750      21.367950       0.730748       0.193856       0.122000   -9999.000000       0.041000   -9999.000000
53884     53884     shanxi         113.0247       36.5081           94       172     2012      05        31        152              0.105500      23.536072       0.000000       0.182280       0.136000       0.155500   -9999.000000   -9999.000000
53884     53884     shanxi         113.0247       36.5081           94       172     2012      06        01        153              0.103333      22.840149       0.700854       0.178420       0.186000   -9999.000000       0.047400       0.489000
53884     53884     shanxi         113.0247       36.5081           94       172     2012      06        02        154              0.105833      22.651215       0.916282       0.183974       0.172000       0.235300       0.053600   -9999.000000
53884     53884     shanxi         113.0247       36.5081           94       172     2012      06        03        155              0.108250      23.001678       1.422825       0.181792       0.151500   -9999.000000       0.050700       0.354000
53884     53884     shanxi         113.0247       36.5081           94       172     2012      06        04        156              0.110000      22.621552       0.877234       0.192082       0.131000       0.048200   -9999.000000   -9999.000000
53884     53884     shanxi         113.0247       36.5081           94       172     2012      06        05        157              0.106458      24.800446       0.471648       0.191069   -9999.000000       0.114700       0.061700       0.330000
53884     53884     shanxi         113.0247       36.5081           94       172     2012      06        06        158              0.096958      25.027313       0.000000       0.182305       0.149000   -9999.000000       0.089500       0.144000
53884     53884     shanxi         113.0247       36.5081           94       172     2012      06        07        159              0.110125      19.066864       2.168756       0.181694       0.114000       0.082900       0.082700   -9999.000000
53884     53884     shanxi         113.0247       36.5081           94       172     2012      06        08        160              0.120958      22.990631       2.984684       0.197190       0.133000       0.142100       0.083500       0.277000
53884     53884     shanxi         113.0247       36.5081           94       172     2012      06        09        161              0.120167      23.738800       0.178065       0.194596       0.120000   -9999.000000   -9999.000000   -9999.000000
53884     53884     shanxi         113.0247       36.5081           94       172     2012      06        10        162              0.112917      26.718170       0.112123       0.176833       0.120000       0.057200       0.077600       0.264000
53884     53884     shanxi         113.0247       36.5081           94       172     2012      06        11        163              0.000000      24.973480       0.000000       0.172226       0.126000   -9999.000000       0.076700   -9999.000000
53884     53884     shanxi         113.0247       36.5081           94       172     2012      06        12        164              0.107125      24.929596       0.000000       0.167805       0.121000       0.116600       0.092000       0.118000
53884     53884     shanxi         113.0247       36.5081           94       172     2012      06        13        165              0.103375      26.667053       0.030210       0.165952       0.129500       0.146700       0.078400       0.300000
53884     53884     shanxi         113.0247       36.5081           94       172     2012      06        14        166              0.100000      28.170044       0.000000       0.164947       0.124000   -9999.000000       0.087000       0.356000
53884     53884     shanxi         113.0247       36.5081           94       172     2012      06        15        167              0.096500      25.501984       0.000000       0.164560       0.138000       0.242200   -9999.000000       0.308000
53884     53884     shanxi         113.0247       36.5081           94       172     2012      06        16        168              0.093917      25.669708       0.000000       0.164091       0.128000   -9999.000000       0.071000   -9999.000000
53884     53884     shanxi         113.0247       36.5081           94       172     2012      06        17        169              0.091250      27.716827       0.000000       0.163618       0.130000   -9999.000000       0.090000       0.253000
53884     53884     shanxi         113.0247       36.5081           94       172     2012      06        18        170              0.088417      29.186554       7.434141       0.162800       0.124500       0.250100       0.070400       0.312000
53884     53884     shanxi         113.0247       36.5081           94       172     2012      06        19        171              0.085667      29.672119       3.651618       0.162376       0.122000   -9999.000000       0.069000       0.386000
53884     53884     shanxi         113.0247       36.5081           94       172     2012      06        20        172              0.082667      28.488007       0.523843       0.194183       0.125000       0.166500   -9999.000000       0.504000
53884     53884     shanxi         113.0247       36.5081           94       172     2012      06        21        173              0.091958      26.017609       8.629483       0.193944       0.144000   -9999.000000       0.093400   -9999.000000
53884     53884     shanxi         113.0247       36.5081           94       172     2012      06        22        174              0.107917      23.979645       4.119193       0.255022       0.128000   -9999.000000       0.082900       0.495000
53884     53884     shanxi         113.0247       36.5081           94       172     2012      06        23        175              0.100167      25.915649       0.878327       0.249216       0.150000   -9999.000000       0.090500       0.460000
53884     53884     shanxi         113.0247       36.5081           94       172     2012      06        24        176              0.123167      22.974335      36.659389       0.248658       0.168500   -9999.000000       0.100900       1.000000
53884     53884     shanxi         113.0247       36.5081           94       172     2012      06        25        177              0.143500      21.673126       1.384321       0.352209       0.157000       0.326800       0.128800       0.966000
53884     53884     shanxi         113.0247       36.5081           94       172     2012      06        26        178              0.138417      22.623169       1.128747       0.317879   -9999.000000       0.212900   -9999.000000   -9999.000000
53884     53884     shanxi         113.0247       36.5081           94       172     2012      06        27        179              0.126625      23.273895       0.587867       0.300095       0.162000   -9999.000000       0.101000       0.675000
53884     53884     shanxi         113.0247       36.5081           94       172     2012      06        28        180              0.134875      21.299896      30.620668       0.288588       0.135000       0.140700       0.131600       0.638000
53884     53884     shanxi         113.0247       36.5081           94       172     2012      06        29        181              0.204000      21.431580      10.046412       0.318293       0.185000   -9999.000000       0.124500       1.000000
53884     53884     shanxi         113.0247       36.5081           94       172     2012      06        30        182              0.180458      20.939728       0.393469       0.359205       0.147000   -9999.000000       0.111500   -9999.000000
53884     53884     shanxi         113.0247       36.5081           94       172     2012      07        01        183              0.159333      24.286499       1.751492       0.326585       0.149000       0.210100       0.103600   -9999.000000
53884     53884     shanxi         113.0247       36.5081           94       172     2012      07        02        184              0.150250      25.343384       0.957430       0.311729       0.181000   -9999.000000   -9999.000000       0.659000
53884     53884     shanxi         113.0247       36.5081           94       172     2012      07        03        185              0.145750      25.838165       0.000000       0.300678       0.143500       0.162500       0.083100   -9999.000000
53884     53884     shanxi         113.0247       36.5081           94       172     2012      07        04        186              0.132125      25.940399       0.229214       0.291045       0.188000   -9999.000000       0.104600       0.611000
53884     53884     shanxi         113.0247       36.5081           94       172     2012      07        05        187              0.132292      23.268341       0.000000       0.289561       0.135000   -9999.000000       0.084000   -9999.000000
53884     53884     shanxi         113.0247       36.5081           94       172     2012      07        06        188              0.128375      25.197052       0.000000       0.276916   -9999.000000       0.248400       0.090100   -9999.000000
53884     53884     shanxi         113.0247       36.5081           94       172     2012      07        07        189              0.121875      25.737915       1.233875       0.266745   -9999.000000   -9999.000000   -9999.000000       0.576000
53884     53884     shanxi         113.0247       36.5081           94       172     2012      07        08        190              0.165833      23.209473      42.760815       0.276333   -9999.000000       0.269400       0.127100   -9999.000000
53884     53884     shanxi         113.0247       36.5081           94       172     2012      07        09        191              0.215750      23.947723      40.298744       0.333096       0.255000   -9999.000000       0.142200       1.000000
53884     53884     shanxi         113.0247       36.5081           94       172     2012      07        10        192              0.195542      22.638184       0.793959       0.392897       0.177500   -9999.000000       0.149700   -9999.000000
53884     53884     shanxi         113.0247       36.5081           94       172     2012      07        11        193              0.183125      24.950897       0.120765       0.356497       0.157000       0.275200       0.132900       0.970000
53884     53884     shanxi         113.0247       36.5081           94       172     2012      07        12        194              0.173958      25.931885       0.492194       0.340698   -9999.000000   -9999.000000       0.125600       0.783000
53884     53884     shanxi         113.0247       36.5081           94       172     2012      07        13        195              0.192333      26.340973      17.869810       0.329670       0.222000       0.082200   -9999.000000       0.700000
53884     53884     shanxi         113.0247       36.5081           94       172     2012      07        14        196              0.202167      23.010620       2.233692       0.364534       0.185500       0.173000       0.130700       0.875000
53884     53884     shanxi         113.0247       36.5081           94       172     2012      07        15        197              0.194958      21.173645       1.231634       0.350258       0.197000   -9999.000000       0.146500   -9999.000000
53884     53884     shanxi         113.0247       36.5081           94       172     2012      07        16        198              0.187917      21.859772       0.000000       0.342340       0.169000       0.080300       0.155700       0.866000
53884     53884     shanxi         113.0247       36.5081           94       172     2012      07        17        199              0.230478      22.907196       0.000000       0.333429       0.154000   -9999.000000       0.159600       0.663000
53884     53884     shanxi         113.0247       36.5081           94       172     2012      07        18        200              0.262583      23.059967       0.000000       0.326961       0.184000   -9999.000000       0.154400       0.733000
53884     53884     shanxi         113.0247       36.5081           94       172     2012      07        19        201              0.254292      23.933258       0.000000       0.321885       0.187000       0.287300   -9999.000000       0.517000
53884     53884     shanxi         113.0247       36.5081           94       172     2012      07        20        202              0.250696      24.641388       0.282643       0.317698       0.125000       0.183100       0.134600   -9999.000000
53884     53884     shanxi         113.0247       36.5081           94       172     2012      07        21        203              0.248174      25.841980       1.904717       0.315014       0.189000       0.132600       0.160700       0.620000
53884     53884     shanxi         113.0247       36.5081           94       172     2012      07        22        204              0.245125      24.486938       0.000000       0.320177       0.178000   -9999.000000       0.131500       0.636000
53884     53884     shanxi         113.0247       36.5081           94       172     2012      07        23        205              0.235417      23.676300       9.736769       0.311948       0.205000       0.303700       0.130800       0.603000
53884     53884     shanxi         113.0247       36.5081           94       172     2012      07        24        206              0.232167      23.530090       0.842759       0.308185       0.219000       0.239500   -9999.000000       0.655000
53884     53884     shanxi         113.0247       36.5081           94       172     2012      07        25        207              0.228125      25.277222       3.095469       0.305625       0.175000   -9999.000000       0.136400   -9999.000000
53884     53884     shanxi         113.0247       36.5081           94       172     2012      07        26        208              0.224708      26.402222       3.853541       0.310302       0.198000   -9999.000000       0.129800       0.579000
53884     53884     shanxi         113.0247       36.5081           94       172     2012      07        27        209              0.222958      26.267273       0.000000       0.317047       0.168000   -9999.000000       0.137200       0.623000
53884     53884     shanxi         113.0247       36.5081           94       172     2012      07        28        210              0.218833      27.302002       0.269422       0.303241       0.154000   -9999.000000       0.116900       0.666000
53884     53884     shanxi         113.0247       36.5081           94       172     2012      07        29        211              0.216750      27.818695       0.000000       0.295934       0.211000       0.388100       0.127900       0.398000
53884     53884     shanxi         113.0247       36.5081           94       172     2012      07        30        212              0.240042      28.437531      38.196766       0.286707       0.175000   -9999.000000   -9999.000000   -9999.000000
53884     53884     shanxi         113.0247       36.5081           94       172     2012      07        31        213              0.313333      26.461060      27.287840       0.336182       0.254500       0.296700       0.116100       0.913000
53884     53884     shanxi         113.0247       36.5081           94       172     2012      08        01        214              0.300583      23.015564       0.898832       0.384383       0.220000   -9999.000000       0.123700   -9999.000000
53884     53884     shanxi         113.0247       36.5081           94       172     2012      08        02        215              0.299333      23.856415       0.735148       0.354796       0.203000       0.347900       0.109800       0.764000
53884     53884     shanxi         113.0247       36.5081           94       172     2012      08        03        216              0.292083      24.612030       0.000000       0.344685       0.229000       0.066800       0.121800   -9999.000000
53884     53884     shanxi         113.0247       36.5081           94       172     2012      08        04        217              0.286333      24.637909       2.077442       0.337391       0.229000   -9999.000000       0.118300   -9999.000000
53884     53884     shanxi         113.0247       36.5081           94       172     2012      08        05        218              0.287833      25.403595       1.258820       0.333206       0.208000       0.517900   -9999.000000       0.687000
53884     53884     shanxi         113.0247       36.5081           94       172     2012      08        06        219              0.281625      24.361359       1.156980       0.336439       0.207000       0.146400       0.145100   -9999.000000
53884     53884     shanxi         113.0247       36.5081           94       172     2012      08        07        220              0.273083      24.704254       0.000000       0.329685       0.169000       0.089300   -9999.000000       0.628000
53884     53884     shanxi         113.0247       36.5081           94       172     2012      08        08        221              0.264750      25.603333       0.909127       0.323242   -9999.000000       0.183400       0.150400   -9999.000000
53884     53884     shanxi         113.0247       36.5081           94       172     2012      08        09        222              0.287667      26.276947      10.056378       0.321467       0.213000   -9999.000000       0.169800       0.972000
53884     53884     shanxi         113.0247       36.5081           94       172     2012      08        10        223              0.279875      22.028473       0.000000       0.347731       0.178500       0.157800   -9999.000000       0.692000
53884     53884     shanxi         113.0247       36.5081           94       172     2012      08        11        224              0.272667      23.736237       0.567106       0.327415       0.215500       0.199800       0.160500       0.733000
53884     53884     shanxi         113.0247       36.5081           94       172     2012      08        12        225              0.271250      25.557465       1.378920       0.321609       0.224000   -9999.000000       0.150700       0.670000
53884     53884     shanxi         113.0247       36.5081           94       172     2012      08        13        226              0.271250      22.443176       4.922829       0.326557       0.243000       0.121500       0.140000   -9999.000000
53884     53884     shanxi         113.0247       36.5081           94       172     2012      08        14        227              0.309875      21.099182      25.760126       0.328318       0.257000   -9999.000000       0.160400       0.969000
53884     53884     shanxi         113.0247       36.5081           94       172     2012      08        15        228              0.294333      20.095978       0.428850       0.373237       0.234000   -9999.000000       0.164600       0.808000
53884     53884     shanxi         113.0247       36.5081           94       172     2012      08        16        229              0.286292      22.927185       0.000000       0.344981       0.209000       0.102900   -9999.000000       0.818000
53884     53884     shanxi         113.0247       36.5081           94       172     2012      08        17        230              0.289750      23.434998      19.398224       0.335330   -9999.000000   -9999.000000       0.142500       0.719000
53884     53884     shanxi         113.0247       36.5081           94       172     2012      08        18        231              0.311667      22.257599      10.957237       0.351279   -9999.000000       0.113100       0.169900   -9999.000000
53884     53884     shanxi         113.0247       36.5081           94       172     2012      08        19        232              0.296500      21.280609       0.139644       0.371892       0.237000   -9999.000000       0.149800       0.883000
53884     53884     shanxi         113.0247       36.5081           94       172     2012      08        20        233              0.291667      22.655975       0.249200       0.350156       0.222000       0.199500       0.155900       0.741000
53884     53884     shanxi         113.0247       36.5081           94       172     2012      08        21        234              0.285292      23.657623       0.000000       0.342864       0.187500   -9999.000000       0.142900       0.853000
53884     53884     shanxi         113.0247       36.5081           94       172     2012      08        22        235              0.275833      20.940552       0.000000       0.334845       0.193000   -9999.000000       0.152500   -9999.000000
53884     53884     shanxi         113.0247       36.5081           94       172     2012      08        23        236              0.269292      19.636383       0.000000       0.330537       0.181000       0.342300       0.125800   -9999.000000
53884     53884     shanxi         113.0247       36.5081           94       172     2012      08        24        237              0.264208      18.800415       0.000000       0.327832       0.168000   -9999.000000       0.157300       0.654000
53884     53884     shanxi         113.0247       36.5081           94       172     2012      08        25        238              0.000000      20.283142       0.000000       0.324346       0.218000       0.135200       0.130800       0.608000
53884     53884     shanxi         113.0247       36.5081           94       172     2012      08        26        239              0.257417      20.631744       0.000000       0.322395       0.202500       0.046200       0.142500       0.635000
53884     53884     shanxi         113.0247       36.5081           94       172     2012      08        27        240              0.253333      21.927521       0.000000       0.319188       0.204500   -9999.000000   -9999.000000       0.492000
53884     53884     shanxi         113.0247       36.5081           94       172     2012      08        28        241              0.249333      22.055389       0.000000       0.317303       0.162000       0.186400       0.163700   -9999.000000
53884     53884     shanxi         113.0247       36.5081           94       172     2012      08        29        242              0.242375      22.460938       0.000000       0.313398       0.154000       0.330900       0.162700       0.477000
53884     53884     shanxi         113.0247       36.5081           94       172     2012      08        30        243              0.236208      22.868866       0.000000       0.308215       0.222000   -9999.000000       0.177800   -9999.000000
53884     53884     shanxi         113.0247       36.5081           94       172     2012      08        31        244              0.234167      23.322601       2.069967       0.305324       0.244000       0.065000       0.166300       0.559000
53884     53884     shanxi         113.0247       36.5081           94       172     2012      09        01        245              0.248739      21.238342      11.491741       0.312388       0.234000   -9999.000000       0.204900   -9999.000000
53884     53884     shanxi         113.0247       36.5081           94       172     2012      09        02        246              0.258667      20.080780       0.000000       0.344767       0.189000   -9999.000000   -9999.000000   -9999.000000
53884     53884     shanxi         113.0247       36.5081           94       172     2012      09        03        247              0.250000      18.919708       0.000000       0.328025       0.164000       0.107700       0.156300       0.512000
53884     53884     shanxi         113.0247       36.5081           94       172     2012      09        04        248              0.246542      19.299774       5.740615       0.317602   -9999.000000   -9999.000000       0.199300   -9999.000000
53884     53884     shanxi         113.0247       36.5081           94       172     2012      09        05        249              0.291500      20.050812       1.192559       0.318025   -9999.000000       0.093500       0.177100       0.667000
53884     53884     shanxi         113.0247       36.5081           94       172     2012      09        06        250              0.294417      20.021210       6.893517       0.331132       0.214000   -9999.000000       0.199500   -9999.000000
53884     53884     shanxi         113.0247       36.5081           94       172     2012      09        07        251              0.289167      18.036102       0.000000       0.340923       0.195000   -9999.000000   -9999.000000       0.754000
53884     53884     shanxi         113.0247       36.5081           94       172     2012      09        08        252              0.282958      20.234100       0.000000       0.328781       0.172000       0.091500       0.205000       0.708000
53884     53884     shanxi         113.0247       36.5081           94       172     2012      09        09        253              0.276583      20.355865       0.000000       0.321043       0.162000       0.245900       0.167800       0.694000
53884     53884     shanxi         113.0247       36.5081           94       172     2012      09        10        254              0.292583      19.801605      11.931272       0.314071       0.245000       0.167400       0.173500       0.911000
53884     53884     shanxi         113.0247       36.5081           94       172     2012      09        11        255              0.295833      17.747467       0.129904       0.338550       0.189000   -9999.000000       0.151800   -9999.000000
53884     53884     shanxi         113.0247       36.5081           94       172     2012      09        12        256              0.285583      19.202484       0.536212       0.334151       0.147000       0.332900       0.157900       0.699000
53884     53884     shanxi         113.0247       36.5081           94       172     2012      09        13        257              0.279500      14.904327       0.000000       0.324064       0.156000       0.141300   -9999.000000       0.554000
53884     53884     shanxi         113.0247       36.5081           94       172     2012      09        14        258              0.275500      15.342804       0.000000       0.318389       0.155000   -9999.000000       0.143700       0.700000
53884     53884     shanxi         113.0247       36.5081           94       172     2012      09        15        259              0.273000      16.381744       0.412134       0.314495       0.181000       0.175900       0.144600       0.622000
53884     53884     shanxi         113.0247       36.5081           94       172     2012      09        16        260              0.269333      16.727722       0.000000       0.311483       0.176000   -9999.000000       0.158100   -9999.000000
53884     53884     shanxi         113.0247       36.5081           94       172     2012      09        17        261              0.265958      16.657379       0.000000       0.308115       0.156000   -9999.000000       0.147700       0.491000
53884     53884     shanxi         113.0247       36.5081           94       172     2012      09        18        262              0.263583      16.992859       0.769916       0.306020       0.174500       0.157000       0.167500       0.737000
53884     53884     shanxi         113.0247       36.5081           94       172     2012      09        19        263              0.285083      17.082397       4.183369       0.305061       0.159000   -9999.000000   -9999.000000       0.803000
53884     53884     shanxi         113.0247       36.5081           94       172     2012      09        20        264              0.284292      15.823120       1.076629       0.321057       0.169000   -9999.000000       0.147000       0.527000
53884     53884     shanxi         113.0247       36.5081           94       172     2012      09        21        265              0.283875      17.226929       2.108697       0.311665   -9999.000000       0.135700       0.190600   -9999.000000
53884     53884     shanxi         113.0247       36.5081           94       172     2012      09        22        266              0.282333      15.293152       0.000000       0.319607       0.183000       0.291900       0.155400       0.572000
53884     53884     shanxi         113.0247       36.5081           94       172     2012      09        23        267              0.279083      17.895477       0.000000       0.311778       0.165500       0.213700       0.176800       0.745000
53884     53884     shanxi         113.0247       36.5081           94       172     2012      09        24        268              0.276333      18.318695       0.000000       0.307927       0.162000   -9999.000000   -9999.000000       0.641000
53884     53884     shanxi         113.0247       36.5081           94       172     2012      09        25        269              0.276417      17.618500       3.398577       0.305133       0.176000       0.314000       0.182100       0.718000
53884     53884     shanxi         113.0247       36.5081           94       172     2012      09        26        270              0.285917      16.814301       0.431151       0.314306       0.201000       0.254900       0.140500   -9999.000000
53884     53884     shanxi         113.0247       36.5081           94       172     2012      09        27        271              0.284143      16.804016       0.000000       0.316224       0.197000   -9999.000000       0.168900       0.470000
53884     53884     shanxi         113.0247       36.5081           94       172     2012      09        28        272              0.270600      15.416351       0.835669       0.306393       0.146000   -9999.000000       0.151800   -9999.000000
53884     53884     shanxi         113.0247       36.5081           94       172     2012      09        29        273              0.267458      12.640289      10.907670       0.301528       0.179000   -9999.000000       0.161100       0.502000
53884     53884     shanxi         113.0247       36.5081           94       172     2012      09        30        274              0.264375      12.960052      24.186567       0.315477       0.170000       0.200200   -9999.000000       0.273000
53884     53884     shanxi         113.0247       36.5081           94       172     2012      10        01        275              0.261917      13.632172      11.551463       0.328757   -9999.000000       0.177100       0.113000   -9999.000000
53884     53884     shanxi         113.0247       36.5081           94       172     2012      10        02        276              0.260917      14.187012       7.576776       0.329486       0.146000   -9999.000000       0.136000       0.439000
53884     53884     shanxi         113.0247       36.5081           94       172     2012      10        03        277              0.259083      16.079041       2.342291       0.322603       0.133000       0.129600       0.124500   -9999.000000
53884     53884     shanxi         113.0247       36.5081           94       172     2012      10        04        278              0.277208      16.352692      15.750874       0.314595       0.165500       0.105000       0.144200       1.000000
53884     53884     shanxi         113.0247       36.5081           94       172     2012      10        05        279              0.286083      15.571930       0.323058       0.345748       0.136000   -9999.000000       0.160400   -9999.000000
53884     53884     shanxi         113.0247       36.5081           94       172     2012      10        06        280              0.278833      14.097595       0.000000       0.332947       0.145000       0.109800   -9999.000000       0.722000
53884     53884     shanxi         113.0247       36.5081           94       172     2012      10        07        281              0.277167      14.628815       0.000000       0.324206       0.164000   -9999.000000       0.108000       0.684000
53884     53884     shanxi         113.0247       36.5081           94       172     2012      10        08        282              0.275583      14.118561       0.171949       0.321260       0.160000       0.149300       0.108000       0.722000
53884     53884     shanxi         113.0247       36.5081           94       172     2012      10        09        283              0.271417      15.169373       0.000000       0.319034       0.138500       0.381400       0.099400       0.536000
53884     53884     shanxi         113.0247       36.5081           94       172     2012      10        10        284              0.266958      12.726501       0.000000       0.313485       0.152500   -9999.000000       0.118900   -9999.000000
53884     53884     shanxi         113.0247       36.5081           94       172     2012      10        11        285              0.266375      12.672302       0.000000       0.311240       0.120000       0.177400   -9999.000000       0.480000
53884     53884     shanxi         113.0247       36.5081           94       172     2012      10        12        286              0.265583      14.136810       0.000000       0.310003       0.120000   -9999.000000       0.101400       0.535000
53884     53884     shanxi         113.0247       36.5081           94       172     2012      10        13        287              0.263000      14.239532       0.000000       0.308588       0.124000       0.278800       0.098100       0.584000
53884     53884     shanxi         113.0247       36.5081           94       172     2012      10        14        288              0.261250      14.013855       0.152869       0.305694       0.119500   -9999.000000       0.116500       0.455000
53884     53884     shanxi         113.0247       36.5081           94       172     2012      10        15        289              0.261500      13.287109       0.545815       0.304308       0.139000   -9999.000000       0.094400   -9999.000000
53884     53884     shanxi         113.0247       36.5081           94       172     2012      10        16        290              0.256958      11.912872       0.000000       0.307731       0.130000       0.237600       0.110200       0.583000
53884     53884     shanxi         113.0247       36.5081           94       172     2012      10        17        291              0.250167       9.192780       0.000000       0.305374       0.133000   -9999.000000   -9999.000000       0.482000
53884     53884     shanxi         113.0247       36.5081           94       172     2012      10        18        292              0.250792       8.639893       0.000000       0.302267       0.133000       0.395800       0.084200       0.560000
53884     53884     shanxi         113.0247       36.5081           94       172     2012      10        19        293              0.250833      11.343567       0.000000       0.301834       0.125000       0.045800       0.102800       0.375000
53884     53884     shanxi         113.0247       36.5081           94       172     2012      10        20        294              0.249708      11.984192       0.000000       0.300765       0.122000   -9999.000000       0.096300   -9999.000000
53884     53884     shanxi         113.0247       36.5081           94       172     2012      10        21        295              0.257250      13.067902       7.549185       0.298948       0.132000       0.164200       0.113100       0.577000
53884     53884     shanxi         113.0247       36.5081           94       172     2012      10        22        296              0.260000       8.669495       0.525639       0.323415   -9999.000000       0.224000       0.097300       0.499000
53884     53884     shanxi         113.0247       36.5081           94       172     2012      10        23        297              0.257208       7.595734       0.000000       0.315200   -9999.000000   -9999.000000       0.091200       0.601000
53884     53884     shanxi         113.0247       36.5081           94       172     2012      10        24        298              0.255208       7.289795       0.000000       0.311564   -9999.000000       0.078400       0.071900       0.355000
53884     53884     shanxi         113.0247       36.5081           94       172     2012      10        25        299              0.000000       9.239929       0.000000       0.308545       0.121000   -9999.000000       0.088800   -9999.000000
53884     53884     shanxi         113.0247       36.5081           94       172     2012      10        26        300              0.253792       9.699921       0.000000       0.306461       0.135000   -9999.000000       0.079800       0.316000
53884     53884     shanxi         113.0247       36.5081           94       172     2012      10        27        301              0.252125       8.239716       0.000000       0.306531       0.125000       0.166900       0.093900   -9999.000000
53884     53884     shanxi         113.0247       36.5081           94       172     2012      10        28        302              0.000000       9.932678       0.192439       0.304256       0.099000   -9999.000000   -9999.000000       0.399000
53884     53884     shanxi         113.0247       36.5081           94       172     2012      10        29        303              0.251042      10.515259       0.000000       0.302299   -9999.000000       0.134100       0.068700   -9999.000000
53884     53884     shanxi         113.0247       36.5081           94       172     2012      10        30        304              0.245167       9.473236       0.000000       0.301357       0.121000   -9999.000000       0.061700   -9999.000000
53884     53884     shanxi         113.0247       36.5081           94       172     2012      10        31        305              0.239417       6.747314       0.138764       0.294831       0.134000   -9999.000000       0.075500       0.310000
53884     53884     shanxi         113.0247       36.5081           94       172     2012      11        01        306              0.237458       6.279297       0.000000       0.292255       0.122000   -9999.000000       0.068600   -9999.000000
53884     53884     shanxi         113.0247       36.5081           94       172     2012      11        02        307              0.239375       6.818726       3.014164       0.295957       0.122000       0.228800       0.079800       0.347000
53884     53884     shanxi         113.0247       36.5081           94       172     2012      11        03        308              0.257000       9.017731       0.000000       0.300925   -9999.000000       0.187900   -9999.000000   -9999.000000
53884     53884     shanxi         113.0247       36.5081           94       172     2012      11        04        309              0.251500       3.254181       0.000000       0.284237   -9999.000000   -9999.000000       0.060700       0.491000
53884     53884     shanxi         113.0247       36.5081           94       172     2012      11        05        310              0.242792       1.606720       0.000000       0.258590       0.125000   -9999.000000       0.066000       0.297000
53884     53884     shanxi         113.0247       36.5081           94       172     2012      11        06        311              0.240375       3.069153       0.000000       0.270137       0.135000       0.079800       0.059500       0.412000
53884     53884     shanxi         113.0247       36.5081           94       172     2012      11        07        312              0.245250       4.646362       0.077813       0.288455       0.136000   -9999.000000       0.071900       0.344000
53884     53884     shanxi         113.0247       36.5081           94       172     2012      11        08        313              0.243583       3.812866       0.000000       0.287568       0.143000       0.100900   -9999.000000   -9999.000000
53884     53884     shanxi         113.0247       36.5081           94       172     2012      11        09        314              0.244667       4.815857       0.099288       0.294386   -9999.000000       0.313100       0.073500       0.284000
53884     53884     shanxi         113.0247       36.5081           94       172     2012      11        10        315              0.264583       4.179138       0.671790       0.298842       0.140000       0.160800       0.054800       0.336000
53884     53884     shanxi         113.0247       36.5081           94       172     2012      11        11        316              0.252083       1.909210       0.000000       0.264658       0.134000       0.062600       0.067800       0.469000
53884     53884     shanxi         113.0247       36.5081           94       172     2012      11        12        317              0.243750       1.119843       0.000000       0.244607       0.123000   -9999.000000       0.060600       0.260000
53884     53884     shanxi         113.0247       36.5081           94       172     2012      11        13        318              0.000000       2.183319       0.000000       0.257504       0.128000   -9999.000000       0.068700   -9999.000000
53884     53884     shanxi         113.0247       36.5081           94       172     2012      11        14        319              0.232750       2.281555       0.000000       0.254846   -9999.000000       0.201700   -9999.000000       0.252000
53884     53884     shanxi         113.0247       36.5081           94       172     2012      11        15        320              0.244375       2.560608       1.126489       0.259349   -9999.000000   -9999.000000       0.050600       0.486000
53884     53884     shanxi         113.0247       36.5081           94       172     2012      11        16        321              0.258708       1.309143       0.000000       0.263049       0.118000   -9999.000000       0.059200       0.520000
53884     53884     shanxi         113.0247       36.5081           94       172     2012      11        17        322              0.000000       1.341766       0.000000       0.249621       0.117000   -9999.000000       0.054900       0.422000
53884     53884     shanxi         113.0247       36.5081           94       172     2012      11        18        323              0.250333       2.130768       0.000000       0.257616       0.120000   -9999.000000       0.067800   -9999.000000
53884     53884     shanxi         113.0247       36.5081           94       172     2012      11        19        324              0.252208       2.913177       0.000000       0.262257   -9999.000000       0.101400       0.060900       0.188000
53884     53884     shanxi         113.0247       36.5081           94       172     2012      11        20        325              0.255583       2.796417       0.000000       0.277345       0.126000       0.141900   -9999.000000       0.289000
53884     53884     shanxi         113.0247       36.5081           94       172     2012      11        21        326              0.254000       3.144867       0.000000       0.291175       0.102000       0.111200       0.040300       0.349000
53884     53884     shanxi         113.0247       36.5081           94       172     2012      11        22        327              0.251667       4.272400       0.000000       0.289939       0.115000   -9999.000000       0.054800       0.167000
53884     53884     shanxi         113.0247       36.5081           94       172     2012      11        23        328              0.244875       2.350739       0.000000       0.267875       0.115000   -9999.000000       0.046100   -9999.000000
53884     53884     shanxi         113.0247       36.5081           94       172     2012      11        24        329              0.234500       0.017181       0.000000       0.228911       0.088000       0.066700       0.054700       0.256000
53884     53884     shanxi         113.0247       36.5081           94       172     2012      11        25        330              0.242125       0.774414       0.551794       0.234534   -9999.000000   -9999.000000   -9999.000000   -9999.000000
53884     53884     shanxi         113.0247       36.5081           94       172     2012      11        26        331              0.229583       0.077881       0.000000       0.233723       0.107000       0.161100   -9999.000000       0.146000
53884     53884     shanxi         113.0247       36.5081           94       172     2012      11        27        332              0.216292      -0.531616       0.000000       0.218795       0.117000   -9999.000000       0.039400   -9999.000000
53884     53884     shanxi         113.0247       36.5081           94       172     2012      11        28        333              0.204958       0.452393       0.000000       0.229814       0.105000       0.093300       0.047900   -9999.000000
53884     53884     shanxi         113.0247       36.5081           94       172     2012      11        29        334              0.183583      -1.217651       0.000000       0.211177       0.103000       0.060400       0.039000       0.122000
53884     53884     shanxi         113.0247       36.5081           94       172     2012      11        30        335              0.170792      -1.903900       0.000000       0.202014   -9999.000000   -9999.000000       0.051500   -9999.000000
53884     53884     shanxi         113.0247       36.5081           94       172     2012      12        01        336              0.173458      -1.028625       0.000000       0.206879   -9999.000000       0.130900   -9999.000000       0.133000
53884     53884     shanxi         113.0247       36.5081           94       172     2012      12        02        337              0.177208      -2.678497       0.000000       0.174324       0.105000       0.226400       0.039900   -9999.000000
53884     53884     shanxi         113.0247       36.5081           94       172     2012      12        03        338              0.170375      -0.980469       0.000000       0.200230       0.107000       0.102500       0.048600       0.080000
53884     53884     shanxi         113.0247       36.5081           94       172     2012      12        04        339              0.163167      -2.718719       0.000000       0.193109       0.107000       0.024800       0.037900       0.101000
53884     53884     shanxi         113.0247       36.5081           94       172     2012      12        05        340              0.159125      -0.330872       0.000000       0.216267   -9999.000000   -9999.000000       0.049400       0.110000
53884     53884     shanxi         113.0247       36.5081           94       172     2012      12        06        341              0.158042      -3.416199       0.000000       0.184049   -9999.000000   -9999.000000       0.050900       0.108000
53884     53884     shanxi         113.0247       36.5081           94       172     2012      12        07        342              0.155292      -0.683655       0.000000       0.208649       0.093000       0.117100   -9999.000000   -9999.000000
53884     53884     shanxi         113.0247       36.5081           94       172     2012      12        08        343              0.150708      -2.069427       0.000000       0.196766       0.112000       0.164000       0.036300       0.046000
53884     53884     shanxi         113.0247       36.5081           94       172     2012      12        09        344              0.147417      -4.455383       0.000000       0.174832       0.099000       0.113600       0.048600       0.022000
53884     53884     shanxi         113.0247       36.5081           94       172     2012      12        10        345              0.147292      -3.882599       0.000000       0.180161       0.101000   -9999.000000       0.029600       0.162000
53884     53884     shanxi         113.0247       36.5081           94       172     2012      12        11        346              0.146208      -3.773224       0.000000       0.183160   -9999.000000       0.185900       0.041600       0.090000
53884     53884     shanxi         113.0247       36.5081           94       172     2012      12        12        347              0.147125      -5.023926       0.000000       0.165896   -9999.000000   -9999.000000   -9999.000000   -9999.000000
53884     53884     shanxi         113.0247       36.5081           94       172     2012      12        13        348              0.152542      -3.707764       0.000000       0.170983   -9999.000000   -9999.000000       0.035700       0.110000
53884     53884     shanxi         113.0247       36.5081           94       172     2012      12        14        349              0.157125      -2.807068       0.000000       0.171536       0.105000       0.133400       0.031500       0.110000
53884     53884     shanxi         113.0247       36.5081           94       172     2012      12        15        350              0.000000      -2.354858       0.000000       0.185289   -9999.000000       0.235300       0.039100       0.166000
53884     53884     shanxi         113.0247       36.5081           94       172     2012      12        16        351              0.161958      -2.443329       0.000000       0.174207   -9999.000000       0.119700   -9999.000000       0.079000
53884     53884     shanxi         113.0247       36.5081           94       172     2012      12        17        352              0.159000      -1.879028       0.000000       0.187570   -9999.000000       0.055100       0.037500   -9999.000000
53884     53884     shanxi         113.0247       36.5081           94       172     2012      12        18        353              0.153167      -2.522675       0.000000       0.195735   -9999.000000   -9999.000000   -9999.000000       0.031000
53884     53884     shanxi         113.0247       36.5081           94       172     2012      12        19        354              0.156250      -2.695984       0.000000       0.180094   -9999.000000       0.107900       0.025800       0.055000
53884     53884     shanxi         113.0247       36.5081           94       172     2012      12        20        355              0.000000      -3.107941       0.000000       0.171789   -9999.000000       0.238900       0.036600       0.081000
53884     53884     shanxi         113.0247       36.5081           94       172     2012      12        21        356              0.155667      -4.276733       0.000000       0.161573   -9999.000000       0.175200       0.024600       0.117000
53884     53884     shanxi         113.0247       36.5081           94       172     2012      12        22        357              0.150125      -4.895172       0.000000       0.168503   -9999.000000       0.082200       0.034300   -9999.000000
53884     53884     shanxi         113.0247       36.5081           94       172     2012      12        23        358              0.143167      -8.048462       0.000000       0.149734   -9999.000000   -9999.000000   -9999.000000       0.021000
53884     53884     shanxi         113.0247       36.5081           94       172     2012      12        24        359              0.141588     -11.284637       0.000000       0.144972   -9999.000000       0.113400       0.032000   -9999.000000
53884     53884     shanxi         113.0247       36.5081           94       172     2012      12        25        360              0.142833      -8.573059       0.000000       0.144362   -9999.000000       0.089700       0.017100       0.036000
53884     53884     shanxi         113.0247       36.5081           94       172     2012      12        26        361              0.000000      -7.337708       0.000000       0.146941   -9999.000000       0.213700       0.030600   -9999.000000
53884     53884     shanxi         113.0247       36.5081           94       172     2012      12        27        362              0.144167      -6.877197       0.000000       0.146509   -9999.000000       0.112800       0.024900   -9999.000000
53884     53884     shanxi         113.0247       36.5081           94       172     2012      12        28        363              0.146000      -5.743134       0.000000       0.149309   -9999.000000   -9999.000000       0.034600       0.030000
53884     53884     shanxi         113.0247       36.5081           94       172     2012      12        29        364              0.000000      -4.264221       0.000000       0.161808   -9999.000000       0.132600   -9999.000000   -9999.000000
53884     53884     shanxi         113.0247       36.5081           94       172     2012      12        30        365              0.000000      -9.735107       0.000000       0.148746   -9999.000000       0.199500       0.026500       0.044000
53884     53884     shanxi         113.0247       36.5081           94       172     2012      12        31        366              0.139400      -8.858612       0.000000       0.144728   -9999.000000   -9999.000000       0.022300   -9999.000000
