# Supplementary material for: Research on Fusing Multisatellite Soil Moisture Data Based on Bayesian Model Averaging
Source: Hindawi journal article supplement (doi:10.1155/2018/9310838), 2018-06-25
Supplement: f1 [file 9310838.f1.zip › 2012_sm00-10cm_daily_ZDB_ZHY_53886_366days_allin.txt]

53886     53886     hebei          113.6722       36.5675           94       175     2012      01        01        001              0.000000   -9999.000000       0.000000   -9999.000000       0.079000   -9999.000000       0.033700   -9999.000000
53886     53886     hebei          113.6722       36.5675           94       175     2012      01        02        002              0.110667      -0.926666       0.000000       0.172878   -9999.000000       0.032400       0.039900       0.164000
53886     53886     hebei          113.6722       36.5675           94       175     2012      01        03        003              0.000000      -0.997070       0.000000       0.174060   -9999.000000       0.043700   -9999.000000       0.104000
53886     53886     hebei          113.6722       36.5675           94       175     2012      01        04        004              0.096500      -2.358948       1.541609       0.165768   -9999.000000   -9999.000000       0.038500   -9999.000000
53886     53886     hebei          113.6722       36.5675           94       175     2012      01        05        005              0.095292      -2.988770       0.149843       0.166883   -9999.000000   -9999.000000       0.037400       0.202000
53886     53886     hebei          113.6722       36.5675           94       175     2012      01        06        006              0.093167      -2.498962       0.000000       0.165861   -9999.000000   -9999.000000       0.039700       0.188000
53886     53886     hebei          113.6722       36.5675           94       175     2012      01        07        007              0.093500      -2.819916       0.000000       0.162378   -9999.000000       0.114100       0.038300       0.179000
53886     53886     hebei          113.6722       36.5675           94       175     2012      01        08        008              0.000000      -2.235840       0.000000       0.162645       0.089000   -9999.000000       0.039500       0.067000
53886     53886     hebei          113.6722       36.5675           94       175     2012      01        09        009              0.097542      -0.534485       0.000000       0.176788       0.091000   -9999.000000   -9999.000000   -9999.000000
53886     53886     hebei          113.6722       36.5675           94       175     2012      01        10        010              0.098292       0.053772       0.000000       0.182331   -9999.000000   -9999.000000       0.026400       0.079000
53886     53886     hebei          113.6722       36.5675           94       175     2012      01        11        011              0.094250      -0.177368       0.000000       0.179356   -9999.000000   -9999.000000       0.031500       0.013000
53886     53886     hebei          113.6722       36.5675           94       175     2012      01        12        012              0.095583      -1.726990       0.000000       0.168608       0.082000       0.213900       0.031000       0.202000
53886     53886     hebei          113.6722       36.5675           94       175     2012      01        13        013              0.096500      -0.185120       0.000000       0.178176       0.094000   -9999.000000       0.031900       0.095000
53886     53886     hebei          113.6722       36.5675           94       175     2012      01        14        014              0.095500      -0.057495       0.000000       0.179243   -9999.000000   -9999.000000       0.032200   -9999.000000
53886     53886     hebei          113.6722       36.5675           94       175     2012      01        15        015              0.097500      -0.424377       0.000000       0.177017   -9999.000000       0.003900       0.030300       0.208000
53886     53886     hebei          113.6722       36.5675           94       175     2012      01        16        016              0.097250       0.129974       0.000000       0.180314   -9999.000000       0.031700       0.029300   -9999.000000
53886     53886     hebei          113.6722       36.5675           94       175     2012      01        17        017              0.000000      -0.829224       0.000000       0.175934       0.083000   -9999.000000       0.034800       0.133000
53886     53886     hebei          113.6722       36.5675           94       175     2012      01        18        018              0.104125       0.710297       0.000000       0.186443   -9999.000000       0.024300       0.031600   -9999.000000
53886     53886     hebei          113.6722       36.5675           94       175     2012      01        19        019              0.105792      -0.082611       0.151078       0.182548       0.094000   -9999.000000       0.033900       0.082000
53886     53886     hebei          113.6722       36.5675           94       175     2012      01        20        020              0.107583       0.681519       1.705270       0.187676   -9999.000000   -9999.000000   -9999.000000       0.080000
53886     53886     hebei          113.6722       36.5675           94       175     2012      01        21        021              0.102458      -2.096222       0.130222       0.167957   -9999.000000   -9999.000000       0.027600   -9999.000000
53886     53886     hebei          113.6722       36.5675           94       175     2012      01        22        022              0.095958      -4.844116       0.806901       0.148063   -9999.000000   -9999.000000       0.024200       0.053000
53886     53886     hebei          113.6722       36.5675           94       175     2012      01        23        023              0.093917      -4.939056       0.000000       0.148251   -9999.000000   -9999.000000       0.030500   -9999.000000
53886     53886     hebei          113.6722       36.5675           94       175     2012      01        24        024              0.092583      -4.079987       0.000000       0.153642   -9999.000000   -9999.000000   -9999.000000       0.127000
53886     53886     hebei          113.6722       36.5675           94       175     2012      01        25        025              0.091750      -3.733429       0.000000       0.156885   -9999.000000   -9999.000000       0.034300       0.128000
53886     53886     hebei          113.6722       36.5675           94       175     2012      01        26        026              0.093708      -2.604614       0.000000       0.162921   -9999.000000   -9999.000000   -9999.000000       0.155000
53886     53886     hebei          113.6722       36.5675           94       175     2012      01        27        027              0.093583      -0.062134       0.000000       0.176927   -9999.000000   -9999.000000       0.028500       0.250000
53886     53886     hebei          113.6722       36.5675           94       175     2012      01        28        028              0.094542      -0.538879       0.000000       0.175528       0.099000   -9999.000000       0.035700   -9999.000000
53886     53886     hebei          113.6722       36.5675           94       175     2012      01        29        029              0.095542      -0.030548       0.000000       0.176454   -9999.000000   -9999.000000       0.033700       0.159000
53886     53886     hebei          113.6722       36.5675           94       175     2012      01        30        030              0.097583      -2.321442       0.000000       0.160913       0.093000       0.119400       0.040100       0.211000
53886     53886     hebei          113.6722       36.5675           94       175     2012      01        31        031              0.100000      -0.256439       0.000000       0.177102   -9999.000000       0.071700   -9999.000000       0.228000
53886     53886     hebei          113.6722       36.5675           94       175     2012      02        01        032              0.097750       0.943878       0.000000       0.181071   -9999.000000   -9999.000000       0.035600       0.195000
53886     53886     hebei          113.6722       36.5675           94       175     2012      02        02        033              0.093625      -2.386719       0.000000       0.166264   -9999.000000       0.029800       0.033900   -9999.000000
53886     53886     hebei          113.6722       36.5675           94       175     2012      02        03        034              0.097125      -2.101257       0.000000       0.164780       0.093000   -9999.000000       0.039000       0.165000
53886     53886     hebei          113.6722       36.5675           94       175     2012      02        04        035              0.098625       0.548615       0.000000       0.178475   -9999.000000       0.077100       0.037200       0.112000
53886     53886     hebei          113.6722       36.5675           94       175     2012      02        05        036              0.104625      -0.096893       0.000000       0.176689   -9999.000000   -9999.000000       0.043300       0.180000
53886     53886     hebei          113.6722       36.5675           94       175     2012      02        06        037              0.104750       1.974548       0.000000       0.189482   -9999.000000   -9999.000000   -9999.000000       0.282000
53886     53886     hebei          113.6722       36.5675           94       175     2012      02        07        038              0.097708       0.365051       0.000000       0.179337       0.083000       0.090200       0.035200   -9999.000000
53886     53886     hebei          113.6722       36.5675           94       175     2012      02        08        039              0.094167      -1.125580       0.000000       0.167937   -9999.000000   -9999.000000       0.035200       0.117000
53886     53886     hebei          113.6722       36.5675           94       175     2012      02        09        040              0.095250      -2.087677       0.000000       0.163336   -9999.000000       0.179300       0.036900       0.150000
53886     53886     hebei          113.6722       36.5675           94       175     2012      02        10        041              0.096792      -1.678101       0.000000       0.164791   -9999.000000   -9999.000000       0.037300       0.180000
53886     53886     hebei          113.6722       36.5675           94       175     2012      02        11        042              0.101333      -0.545349       0.000000       0.170934   -9999.000000   -9999.000000       0.038300       0.243000
53886     53886     hebei          113.6722       36.5675           94       175     2012      02        12        043              0.105833       1.712158       0.000000       0.179923   -9999.000000   -9999.000000   -9999.000000   -9999.000000
53886     53886     hebei          113.6722       36.5675           94       175     2012      02        13        044              0.105792       0.598419       0.000000       0.178186       0.085000       0.025900   -9999.000000       0.229000
53886     53886     hebei          113.6722       36.5675           94       175     2012      02        14        045              0.111750       1.558655       0.000000       0.184413       0.085000   -9999.000000       0.037200   -9999.000000
53886     53886     hebei          113.6722       36.5675           94       175     2012      02        15        046              0.113167       2.324738       0.000000       0.187964   -9999.000000   -9999.000000       0.037300       0.182000
53886     53886     hebei          113.6722       36.5675           94       175     2012      02        16        047              0.109625       1.686676       0.000000       0.184008   -9999.000000   -9999.000000       0.037300   -9999.000000
53886     53886     hebei          113.6722       36.5675           94       175     2012      02        17        048              0.105125       1.530457       0.000000       0.179933   -9999.000000       0.103000   -9999.000000   -9999.000000
53886     53886     hebei          113.6722       36.5675           94       175     2012      02        18        049              0.103667       0.942352       0.000000       0.174489       0.084000   -9999.000000       0.036900       0.115000
53886     53886     hebei          113.6722       36.5675           94       175     2012      02        19        050              0.105792       0.767975       0.000000       0.172574       0.083000   -9999.000000       0.034300   -9999.000000
53886     53886     hebei          113.6722       36.5675           94       175     2012      02        20        051              0.113083       2.542694       0.000000       0.177752       0.083000   -9999.000000       0.037500       0.373000
53886     53886     hebei          113.6722       36.5675           94       175     2012      02        21        052              0.128542       4.499329       0.000000       0.186235   -9999.000000   -9999.000000   -9999.000000   -9999.000000
53886     53886     hebei          113.6722       36.5675           94       175     2012      02        22        053              0.140792       4.532410       0.000000       0.185131   -9999.000000   -9999.000000       0.043200       0.373000
53886     53886     hebei          113.6722       36.5675           94       175     2012      02        23        054              0.151875       7.183197       0.000000       0.189371       0.072000       0.022900   -9999.000000       0.182000
53886     53886     hebei          113.6722       36.5675           94       175     2012      02        24        055              0.154652       3.225403       0.000000       0.182015       0.083000   -9999.000000       0.036100       0.302000
53886     53886     hebei          113.6722       36.5675           94       175     2012      02        25        056              0.152625       3.096283       0.000000       0.182234   -9999.000000   -9999.000000       0.037500       0.293000
53886     53886     hebei          113.6722       36.5675           94       175     2012      02        26        057              0.149750       0.528778       0.000000       0.174735   -9999.000000       0.010600       0.039500   -9999.000000
53886     53886     hebei          113.6722       36.5675           94       175     2012      02        27        058              0.150958       1.747192       0.000000       0.177204   -9999.000000   -9999.000000   -9999.000000       0.349000
53886     53886     hebei          113.6722       36.5675           94       175     2012      02        28        059              0.158667       4.301300       0.000000       0.185024       0.071000       0.081500       0.039400       0.277000
53886     53886     hebei          113.6722       36.5675           94       175     2012      02        29        060              0.000000   -9999.000000       0.000000   -9999.000000       0.086000   -9999.000000   -9999.000000   -9999.000000
53886     53886     hebei          113.6722       36.5675           94       175     2012      03        01        061              0.174000       4.767395       0.535670       0.186194   -9999.000000   -9999.000000       0.028100       0.479000
53886     53886     hebei          113.6722       36.5675           94       175     2012      03        02        062              0.176833       2.941895       0.546348       0.188626   -9999.000000   -9999.000000       0.035200   -9999.000000
53886     53886     hebei          113.6722       36.5675           94       175     2012      03        03        063              0.171333       1.600708       0.000000       0.184711   -9999.000000   -9999.000000       0.039500       0.245000
53886     53886     hebei          113.6722       36.5675           94       175     2012      03        04        064              0.166917       1.117279       0.000000       0.180185       0.101000   -9999.000000       0.043800       0.302000
53886     53886     hebei          113.6722       36.5675           94       175     2012      03        05        065              0.164708       2.990417       0.000000       0.187136       0.105000   -9999.000000   -9999.000000       0.384000
53886     53886     hebei          113.6722       36.5675           94       175     2012      03        06        066              0.161708       5.046783       0.111029       0.191897       0.101000   -9999.000000       0.041500       0.229000
53886     53886     hebei          113.6722       36.5675           94       175     2012      03        07        067              0.000000       5.262299       0.176883       0.188648       0.099000   -9999.000000       0.036900   -9999.000000
53886     53886     hebei          113.6722       36.5675           94       175     2012      03        08        068              0.158583       7.538330       0.093154       0.189434   -9999.000000   -9999.000000       0.041600       0.263000
53886     53886     hebei          113.6722       36.5675           94       175     2012      03        09        069              0.157167       3.798431       0.000000       0.181349   -9999.000000   -9999.000000       0.040400       0.314000
53886     53886     hebei          113.6722       36.5675           94       175     2012      03        10        070              0.156333       5.156189       0.000000       0.183174       0.085000   -9999.000000       0.046700       0.403000
53886     53886     hebei          113.6722       36.5675           94       175     2012      03        11        071              0.154125       6.921753       0.000000       0.178911       0.086000   -9999.000000   -9999.000000       0.196000
53886     53886     hebei          113.6722       36.5675           94       175     2012      03        12        072              0.153625       4.273468       0.000000       0.174054       0.086000       0.028800       0.038000   -9999.000000
53886     53886     hebei          113.6722       36.5675           94       175     2012      03        13        073              0.153458       6.037445       0.000000       0.176966   -9999.000000   -9999.000000       0.043000       0.337000
53886     53886     hebei          113.6722       36.5675           94       175     2012      03        14        074              0.152917      10.415863       0.000000       0.175222   -9999.000000       0.159000   -9999.000000   -9999.000000
53886     53886     hebei          113.6722       36.5675           94       175     2012      03        15        075              0.151042       8.246490       0.000000       0.172595       0.080500       0.034600       0.048500       0.283000
53886     53886     hebei          113.6722       36.5675           94       175     2012      03        16        076              0.152125       5.794769       0.000000       0.174614       0.085000   -9999.000000       0.047000   -9999.000000
53886     53886     hebei          113.6722       36.5675           94       175     2012      03        17        077              0.152250      11.418640       0.000000       0.173185       0.083000       0.142000   -9999.000000   -9999.000000
53886     53886     hebei          113.6722       36.5675           94       175     2012      03        18        078              0.147417      14.051697       0.037730       0.168936   -9999.000000   -9999.000000       0.038100       0.119000
53886     53886     hebei          113.6722       36.5675           94       175     2012      03        19        079              0.147250       3.030457       0.156819       0.170891   -9999.000000   -9999.000000       0.051400   -9999.000000
53886     53886     hebei          113.6722       36.5675           94       175     2012      03        20        080              0.150667       2.774902       1.534933       0.176869       0.082000       0.071000       0.050200       0.392000
53886     53886     hebei          113.6722       36.5675           94       175     2012      03        21        081              0.155625       6.813660       1.709870       0.181796       0.112000   -9999.000000       0.065300   -9999.000000
53886     53886     hebei          113.6722       36.5675           94       175     2012      03        22        082              0.180583       4.302521       0.938951       0.196904   -9999.000000       0.006200   -9999.000000       1.000000
53886     53886     hebei          113.6722       36.5675           94       175     2012      03        23        083              0.171292       4.513672       0.063145       0.223126       0.105000   -9999.000000       0.052000       0.496000
53886     53886     hebei          113.6722       36.5675           94       175     2012      03        24        084              0.166167       8.205017       0.000000       0.209271   -9999.000000   -9999.000000   -9999.000000       0.433000
53886     53886     hebei          113.6722       36.5675           94       175     2012      03        25        085              0.000000      12.338013       0.000000       0.194824       0.087000       0.102800       0.052300       0.414000
53886     53886     hebei          113.6722       36.5675           94       175     2012      03        26        086              0.161125      12.386902       0.000000       0.184194       0.089000   -9999.000000       0.051600   -9999.000000
53886     53886     hebei          113.6722       36.5675           94       175     2012      03        27        087              0.158708      15.299744       0.000000       0.175137       0.085000   -9999.000000       0.054800       0.583000
53886     53886     hebei          113.6722       36.5675           94       175     2012      03        28        088              0.156542      16.303802       0.030016       0.167725       0.085000   -9999.000000   -9999.000000       0.447000
53886     53886     hebei          113.6722       36.5675           94       175     2012      03        29        089              0.155000      16.462585       0.000000       0.165097       0.079000   -9999.000000       0.045500       0.507000
53886     53886     hebei          113.6722       36.5675           94       175     2012      03        30        090              0.149625      18.415314       0.000000       0.163178       0.077000       0.090500       0.051500       0.408000
53886     53886     hebei          113.6722       36.5675           94       175     2012      03        31        091              0.145917      13.814484       0.765962       0.161421       0.076000   -9999.000000       0.043700   -9999.000000
53886     53886     hebei          113.6722       36.5675           94       175     2012      04        01        092              0.142292      16.274567       0.000000       0.159405       0.087500   -9999.000000       0.051700       0.494000
53886     53886     hebei          113.6722       36.5675           94       175     2012      04        02        093              0.139083      14.167572       0.000000       0.159607       0.090000       0.050000       0.059100       0.322000
53886     53886     hebei          113.6722       36.5675           94       175     2012      04        03        094              0.138500       8.886261       0.000000       0.162672       0.088000   -9999.000000   -9999.000000       0.511000
53886     53886     hebei          113.6722       36.5675           94       175     2012      04        04        095              0.137208      14.893738       0.000000       0.160545       0.087000       0.043800       0.043600       0.421000
53886     53886     hebei          113.6722       36.5675           94       175     2012      04        05        096              0.133708      18.188934       0.000000       0.157496       0.082000   -9999.000000       0.055600   -9999.000000
53886     53886     hebei          113.6722       36.5675           94       175     2012      04        06        097              0.130708      18.852448       0.000000       0.155986       0.085500   -9999.000000       0.047300       0.359000
53886     53886     hebei          113.6722       36.5675           94       175     2012      04        07        098              0.127500      19.609985       0.000000       0.155149       0.081000       0.158900       0.054100       0.489000
53886     53886     hebei          113.6722       36.5675           94       175     2012      04        08        099              0.124208      20.668854       0.000000       0.154278       0.087000   -9999.000000   -9999.000000       0.505000
53886     53886     hebei          113.6722       36.5675           94       175     2012      04        09        100              0.119917      21.339447       1.443455       0.154002       0.099000       0.053700       0.054600       0.389000
53886     53886     hebei          113.6722       36.5675           94       175     2012      04        10        101              0.118583      20.265686       3.612197       0.162206       0.088500   -9999.000000       0.051600   -9999.000000
53886     53886     hebei          113.6722       36.5675           94       175     2012      04        11        102              0.118875      19.049500       7.928299       0.209961       0.107000       0.066900       0.064800       0.312000
53886     53886     hebei          113.6722       36.5675           94       175     2012      04        12        103              0.127708      16.293579       0.000000       0.227044       0.122000       0.050500       0.055300   -9999.000000
53886     53886     hebei          113.6722       36.5675           94       175     2012      04        13        104              0.129000      14.957001       0.000000       0.250246       0.095000   -9999.000000       0.051500       0.376000
53886     53886     hebei          113.6722       36.5675           94       175     2012      04        14        105              0.125083      19.112335       0.000000       0.218946       0.094000   -9999.000000   -9999.000000   -9999.000000
53886     53886     hebei          113.6722       36.5675           94       175     2012      04        15        106              0.123167      19.266296       0.000000       0.200062       0.095000       0.043000       0.043500       0.475000
53886     53886     hebei          113.6722       36.5675           94       175     2012      04        16        107              0.119304      21.703217       0.000000       0.184338       0.093500   -9999.000000       0.052900       0.371000
53886     53886     hebei          113.6722       36.5675           94       175     2012      04        17        108              0.117167      19.204407       0.000000       0.174756       0.085000       0.065800       0.044000   -9999.000000
53886     53886     hebei          113.6722       36.5675           94       175     2012      04        18        109              0.114333      21.859772       0.142837       0.169141       0.087000   -9999.000000   -9999.000000       0.405000
53886     53886     hebei          113.6722       36.5675           94       175     2012      04        19        110              0.111625      21.796448       2.135968       0.165607       0.095000       0.104900       0.051600   -9999.000000
53886     53886     hebei          113.6722       36.5675           94       175     2012      04        20        111              0.106917      22.944672       4.456379       0.173860       0.099000   -9999.000000   -9999.000000       0.535000
53886     53886     hebei          113.6722       36.5675           94       175     2012      04        21        112              0.107708      18.646576       3.078537       0.221057       0.106500   -9999.000000       0.044000       0.599000
53886     53886     hebei          113.6722       36.5675           94       175     2012      04        22        113              0.110208      18.719086       1.231585       0.248657       0.103000       0.184600       0.055300       0.637000
53886     53886     hebei          113.6722       36.5675           94       175     2012      04        23        114              0.111875      22.957214       4.155176       0.225521       0.095000   -9999.000000       0.076500       0.541000
53886     53886     hebei          113.6722       36.5675           94       175     2012      04        24        115              0.169542      24.211700      10.192333       0.226441       0.166000   -9999.000000       0.099800   -9999.000000
53886     53886     hebei          113.6722       36.5675           94       175     2012      04        25        116              0.000000      16.309540       0.000000       0.289484       0.139000       0.236900   -9999.000000       1.000000
53886     53886     hebei          113.6722       36.5675           94       175     2012      04        26        117              0.146625      16.841614       0.000000       0.252865       0.109000   -9999.000000       0.081900       0.602000
53886     53886     hebei          113.6722       36.5675           94       175     2012      04        27        118              0.140417      21.793335       0.000000       0.226561       0.103500       0.125400   -9999.000000       0.632000
53886     53886     hebei          113.6722       36.5675           94       175     2012      04        28        119              0.135542      23.268890       0.000000       0.204313       0.089000   -9999.000000       0.081400       0.411000
53886     53886     hebei          113.6722       36.5675           94       175     2012      04        29        120              0.132917      20.246704       0.000000       0.190402       0.089000       0.078600       0.069100   -9999.000000
53886     53886     hebei          113.6722       36.5675           94       175     2012      04        30        121              0.130083      21.647919       0.000000       0.180742       0.108000       0.152300       0.082300       0.538000
53886     53886     hebei          113.6722       36.5675           94       175     2012      05        01        122              0.127167      24.249969       0.000000       0.174378       0.140500   -9999.000000   -9999.000000       0.516000
53886     53886     hebei          113.6722       36.5675           94       175     2012      05        02        123              0.125208      23.556488       0.000000       0.171656       0.141500       0.141900       0.067800       0.562000
53886     53886     hebei          113.6722       36.5675           94       175     2012      05        03        124              0.122208      25.562378       0.000000       0.166811       0.117000   -9999.000000       0.082100       0.445000
53886     53886     hebei          113.6722       36.5675           94       175     2012      05        04        125              0.119667      25.993896       0.000000       0.162044       0.121000       0.196800       0.070700   -9999.000000
53886     53886     hebei          113.6722       36.5675           94       175     2012      05        05        126              0.115833      27.937134       0.000000       0.158782       0.141000   -9999.000000       0.078200       0.450000
53886     53886     hebei          113.6722       36.5675           94       175     2012      05        06        127              0.113500      26.913513       0.000000       0.157724       0.127000   -9999.000000       0.073700       0.434000
53886     53886     hebei          113.6722       36.5675           94       175     2012      05        07        128              0.109542      29.768463       0.000000       0.155945   -9999.000000       0.118600       0.100200       0.487000
53886     53886     hebei          113.6722       36.5675           94       175     2012      05        08        129              0.107458      27.873810       0.000000       0.156082       0.114000   -9999.000000       0.090500       0.322000
53886     53886     hebei          113.6722       36.5675           94       175     2012      05        09        130              0.105083      26.815857       1.846575       0.155987       0.117000       0.372000       0.102900   -9999.000000
53886     53886     hebei          113.6722       36.5675           94       175     2012      05        10        131              0.104167      26.749420       0.000000       0.156664       0.137000   -9999.000000       0.095300       0.447000
53886     53886     hebei          113.6722       36.5675           94       175     2012      05        11        132              0.101833      29.523376       1.487489       0.153998       0.221000   -9999.000000       0.095400   -9999.000000
53886     53886     hebei          113.6722       36.5675           94       175     2012      05        12        133              0.099250      26.165405       0.000000       0.164425       0.167000       0.131300   -9999.000000       0.391000
53886     53886     hebei          113.6722       36.5675           94       175     2012      05        13        134              0.097500      22.875153       0.000000       0.165970       0.149500       0.310700       0.094000   -9999.000000
53886     53886     hebei          113.6722       36.5675           94       175     2012      05        14        135              0.094625      25.259460       0.000000       0.154299       0.145000   -9999.000000       0.109300       0.390000
53886     53886     hebei          113.6722       36.5675           94       175     2012      05        15        136              0.092208      24.856964       0.000000       0.149776   -9999.000000       0.156300       0.115200       0.354000
53886     53886     hebei          113.6722       36.5675           94       175     2012      05        16        137              0.091542      25.430908       0.000000       0.148163       0.152000   -9999.000000       0.102100   -9999.000000
53886     53886     hebei          113.6722       36.5675           94       175     2012      05        17        138              0.090500      26.029144       0.000000       0.147495       0.137000   -9999.000000       0.110000       0.484000
53886     53886     hebei          113.6722       36.5675           94       175     2012      05        18        139              0.088375      28.419342       0.000000       0.146398       0.153500       0.071900   -9999.000000   -9999.000000
53886     53886     hebei          113.6722       36.5675           94       175     2012      05        19        140              0.086542      29.386902       0.294696       0.146415       0.151000   -9999.000000       0.104200       0.438000
53886     53886     hebei          113.6722       36.5675           94       175     2012      05        20        141              0.085000      28.242889       0.464831       0.146861       0.136000   -9999.000000       0.114000       0.456000
53886     53886     hebei          113.6722       36.5675           94       175     2012      05        21        142              0.083958      28.768402       0.119040       0.149205   -9999.000000   -9999.000000       0.081000       0.375000
53886     53886     hebei          113.6722       36.5675           94       175     2012      05        22        143              0.084375      23.736328       0.495305       0.149811       0.170000       0.167700       0.089500       0.353000
53886     53886     hebei          113.6722       36.5675           94       175     2012      05        23        144              0.084583      23.603241       3.007099       0.149638   -9999.000000       0.287600   -9999.000000   -9999.000000
53886     53886     hebei          113.6722       36.5675           94       175     2012      05        24        145              0.084875      23.750854       0.104048       0.168428       0.187000   -9999.000000       0.095200       0.542000
53886     53886     hebei          113.6722       36.5675           94       175     2012      05        25        146              0.000000      23.317108       0.000000       0.173146       0.153000       0.165500       0.079500       0.494000
53886     53886     hebei          113.6722       36.5675           94       175     2012      05        26        147              0.087667      26.844696       1.082277       0.156680       0.162000       0.133900       0.091900       0.505000
53886     53886     hebei          113.6722       36.5675           94       175     2012      05        27        148              0.088042      27.762238       0.000000       0.150195       0.162000   -9999.000000       0.085400       0.347000
53886     53886     hebei          113.6722       36.5675           94       175     2012      05        28        149              0.087542      29.614044       0.353815       0.146418       0.146500       0.079900       0.087200   -9999.000000
53886     53886     hebei          113.6722       36.5675           94       175     2012      05        29        150              0.085333      29.158203       0.340875       0.145462       0.168500   -9999.000000   -9999.000000       0.497000
53886     53886     hebei          113.6722       36.5675           94       175     2012      05        30        151              0.084917      25.699188       0.000000       0.146438       0.148000       0.184800       0.081600   -9999.000000
53886     53886     hebei          113.6722       36.5675           94       175     2012      05        31        152              0.084333      26.509460       0.000000       0.144810       0.164000       0.027100   -9999.000000   -9999.000000
53886     53886     hebei          113.6722       36.5675           94       175     2012      06        01        153              0.108708      27.255280      10.657195       0.143670       0.218000   -9999.000000       0.104900       0.892000
53886     53886     hebei          113.6722       36.5675           94       175     2012      06        02        154              0.123500      24.904724       8.571529       0.251433       0.176000       0.096200       0.082900   -9999.000000
53886     53886     hebei          113.6722       36.5675           94       175     2012      06        03        155              0.117292      23.147125       0.978999       0.280734       0.175500   -9999.000000       0.089200       0.479000
53886     53886     hebei          113.6722       36.5675           94       175     2012      06        04        156              0.115042      23.837219       3.251961       0.244624       0.148000   -9999.000000   -9999.000000       0.541000
53886     53886     hebei          113.6722       36.5675           94       175     2012      06        05        157              0.111375      26.935913       0.691211       0.208736   -9999.000000       0.155200       0.090800       0.507000
53886     53886     hebei          113.6722       36.5675           94       175     2012      06        06        158              0.105292      27.341766       0.000000       0.191936       0.169000   -9999.000000       0.107100       0.421000
53886     53886     hebei          113.6722       36.5675           94       175     2012      06        07        159              0.106333      23.241394       1.536789       0.186726       0.162000   -9999.000000       0.096900   -9999.000000
53886     53886     hebei          113.6722       36.5675           94       175     2012      06        08        160              0.104708      26.853973       0.000000       0.185836       0.161000       0.106100       0.102800       0.393000
53886     53886     hebei          113.6722       36.5675           94       175     2012      06        09        161              0.103292      27.881195       2.118744       0.172990       0.144000   -9999.000000   -9999.000000   -9999.000000
53886     53886     hebei          113.6722       36.5675           94       175     2012      06        10        162              0.098522      30.843079       0.473281       0.161964       0.140000       0.269800       0.104600       0.386000
53886     53886     hebei          113.6722       36.5675           94       175     2012      06        11        163              0.000000      25.713623       0.000000       0.180400       0.146000   -9999.000000       0.115400   -9999.000000
53886     53886     hebei          113.6722       36.5675           94       175     2012      06        12        164              0.096625      28.451538       0.000000       0.157364       0.150000       0.188200       0.131700   -9999.000000
53886     53886     hebei          113.6722       36.5675           94       175     2012      06        13        165              0.094583      30.864380       0.027574       0.149840       0.163000       0.062500       0.117400       0.547000
53886     53886     hebei          113.6722       36.5675           94       175     2012      06        14        166              0.092476      32.188965       0.000000       0.147738       0.143000   -9999.000000       0.127000   -9999.000000
53886     53886     hebei          113.6722       36.5675           94       175     2012      06        15        167              0.089250      30.897552       0.000000       0.146129       0.142000       0.035400   -9999.000000       0.349000
53886     53886     hebei          113.6722       36.5675           94       175     2012      06        16        168              0.087292      29.929688       0.000000       0.145173       0.148000   -9999.000000       0.121400   -9999.000000
53886     53886     hebei          113.6722       36.5675           94       175     2012      06        17        169              0.085458      31.649567       0.000000       0.143983       0.159000   -9999.000000       0.132100       0.547000
53886     53886     hebei          113.6722       36.5675           94       175     2012      06        18        170              0.083417      32.977142       2.462214       0.142818       0.141000       0.165500       0.089000       0.560000
53886     53886     hebei          113.6722       36.5675           94       175     2012      06        19        171              0.084208      33.462799       0.000000       0.142350       0.155000   -9999.000000       0.091800       0.571000
53886     53886     hebei          113.6722       36.5675           94       175     2012      06        20        172              0.091000      34.258514       0.000000       0.141511       0.151000   -9999.000000       0.078300       0.488000
53886     53886     hebei          113.6722       36.5675           94       175     2012      06        21        173              0.092292      32.645660       2.032159       0.141296       0.165000   -9999.000000   -9999.000000   -9999.000000
53886     53886     hebei          113.6722       36.5675           94       175     2012      06        22        174              0.095292      30.253784       4.513534       0.160166   -9999.000000   -9999.000000       0.084100       0.598000
53886     53886     hebei          113.6722       36.5675           94       175     2012      06        23        175              0.114417      30.711853       3.943683       0.173223       0.158000       0.160900       0.099400       0.670000
53886     53886     hebei          113.6722       36.5675           94       175     2012      06        24        176              0.147458      26.549530      20.275202       0.230831       0.207500   -9999.000000       0.109900       0.661000
53886     53886     hebei          113.6722       36.5675           94       175     2012      06        25        177              0.142292      24.621460      11.009560       0.304316       0.187000       0.320300       0.155600       0.762000
53886     53886     hebei          113.6722       36.5675           94       175     2012      06        26        178              0.136000      25.309174       4.877672       0.290919       0.197000       0.113200   -9999.000000   -9999.000000
53886     53886     hebei          113.6722       36.5675           94       175     2012      06        27        179              0.131708      26.124481       0.092172       0.286412       0.220000   -9999.000000       0.152900       1.000000
53886     53886     hebei          113.6722       36.5675           94       175     2012      06        28        180              0.132792      23.765533      20.685280       0.275348       0.191000       0.329000       0.152000       0.710000
53886     53886     hebei          113.6722       36.5675           94       175     2012      06        29        181              0.176750      23.914673      13.838683       0.282421       0.239000   -9999.000000       0.166600       1.000000
53886     53886     hebei          113.6722       36.5675           94       175     2012      06        30        182              0.156958      23.227814       0.000000       0.334574       0.190000       0.454000       0.154600   -9999.000000
53886     53886     hebei          113.6722       36.5675           94       175     2012      07        01        183              0.145667      27.263794      10.561917       0.294124       0.181000       0.231800       0.145600   -9999.000000
53886     53886     hebei          113.6722       36.5675           94       175     2012      07        02        184              0.135708      28.899811       3.477173       0.271390       0.200000       0.172800   -9999.000000       0.883000
53886     53886     hebei          113.6722       36.5675           94       175     2012      07        03        185              0.130250      27.901276       0.000000       0.272822       0.176000       0.173500       0.128100       0.638000
53886     53886     hebei          113.6722       36.5675           94       175     2012      07        04        186              0.148000      29.549194      19.951532       0.255375       0.234000   -9999.000000       0.155100       0.805000
53886     53886     hebei          113.6722       36.5675           94       175     2012      07        05        187              0.168125      25.816925       0.000000       0.300308       0.151000   -9999.000000       0.141200       0.657000
53886     53886     hebei          113.6722       36.5675           94       175     2012      07        06        188              0.154708      26.528900       0.000000       0.297727   -9999.000000       0.230900       0.138000   -9999.000000
53886     53886     hebei          113.6722       36.5675           94       175     2012      07        07        189              0.150625      28.449036       3.092870       0.272558   -9999.000000   -9999.000000       0.150700       1.000000
53886     53886     hebei          113.6722       36.5675           94       175     2012      07        08        190              0.155042      25.623657      11.477035       0.280280   -9999.000000       0.208300   -9999.000000   -9999.000000
53886     53886     hebei          113.6722       36.5675           94       175     2012      07        09        191              0.200792      27.088654      41.410786       0.293459   -9999.000000   -9999.000000       0.109800       1.000000
53886     53886     hebei          113.6722       36.5675           94       175     2012      07        10        192              0.185542      25.209381       4.821968       0.361962       0.215000   -9999.000000       0.113100   -9999.000000
53886     53886     hebei          113.6722       36.5675           94       175     2012      07        11        193              0.169458      27.850250       0.000000       0.332780       0.172000       0.190000       0.106500       1.000000
53886     53886     hebei          113.6722       36.5675           94       175     2012      07        12        194              0.157583      28.935120       0.591268       0.309146       0.160000       0.366800       0.103500       0.767000
53886     53886     hebei          113.6722       36.5675           94       175     2012      07        13        195              0.158750      29.347473      21.692444       0.294964       0.206000       0.224200   -9999.000000   -9999.000000
53886     53886     hebei          113.6722       36.5675           94       175     2012      07        14        196              0.192083      24.701294       5.225693       0.316546       0.201000       0.134700       0.107500       0.934000
53886     53886     hebei          113.6722       36.5675           94       175     2012      07        15        197              0.177708      23.377716       0.000000       0.335570       0.206500   -9999.000000       0.101700   -9999.000000
53886     53886     hebei          113.6722       36.5675           94       175     2012      07        16        198              0.168542      25.864960       0.000000       0.311149       0.182000       0.169300       0.141700       0.998000
53886     53886     hebei          113.6722       36.5675           94       175     2012      07        17        199              0.159333      25.862183       0.000000       0.298031       0.171000   -9999.000000       0.128700       0.827000
53886     53886     hebei          113.6722       36.5675           94       175     2012      07        18        200              0.151250      26.378052       0.000000       0.288980       0.194000   -9999.000000       0.131600       0.770000
53886     53886     hebei          113.6722       36.5675           94       175     2012      07        19        201              0.143417      26.964172       0.000000       0.281248       0.182000       0.238600   -9999.000000       0.718000
53886     53886     hebei          113.6722       36.5675           94       175     2012      07        20        202              0.137261      27.847961       0.804720       0.272993       0.156000       0.035500       0.128600   -9999.000000
53886     53886     hebei          113.6722       36.5675           94       175     2012      07        21        203              0.134333      28.876251       3.994576       0.267750       0.206500   -9999.000000       0.125700       0.891000
53886     53886     hebei          113.6722       36.5675           94       175     2012      07        22        204              0.130125      27.772064       0.128521       0.288424       0.186000   -9999.000000       0.127100       0.828000
53886     53886     hebei          113.6722       36.5675           94       175     2012      07        23        205              0.121750      27.292328      16.158192       0.273497       0.208000   -9999.000000       0.078500       0.741000
53886     53886     hebei          113.6722       36.5675           94       175     2012      07        24        206              0.116000      27.133423       0.594896       0.261453       0.211000       0.228300   -9999.000000       0.586000
53886     53886     hebei          113.6722       36.5675           94       175     2012      07        25        207              0.111167      28.798492       1.092016       0.250034       0.171500   -9999.000000       0.082900   -9999.000000
53886     53886     hebei          113.6722       36.5675           94       175     2012      07        26        208              0.107792      30.079834       3.066957       0.250738       0.184000       0.406100       0.080000       0.852000
53886     53886     hebei          113.6722       36.5675           94       175     2012      07        27        209              0.104708      30.562012       0.476124       0.250207       0.169000   -9999.000000       0.085700       0.729000
53886     53886     hebei          113.6722       36.5675           94       175     2012      07        28        210              0.103542      29.724457       0.000000       0.250344       0.170000   -9999.000000       0.077100       0.780000
53886     53886     hebei          113.6722       36.5675           94       175     2012      07        29        211              0.121708      32.070282      21.941441       0.232245   -9999.000000       0.138800       0.080500       0.765000
53886     53886     hebei          113.6722       36.5675           94       175     2012      07        30        212              0.147833      31.830048       9.318211       0.299864   -9999.000000   -9999.000000   -9999.000000   -9999.000000
53886     53886     hebei          113.6722       36.5675           94       175     2012      07        31        213              0.177375      27.526306      22.859844       0.314377       0.260000   -9999.000000       0.153600       1.000000
53886     53886     hebei          113.6722       36.5675           94       175     2012      08        01        214              0.159917      23.540283       1.294746       0.347874       0.229000   -9999.000000       0.144100       0.834000
53886     53886     hebei          113.6722       36.5675           94       175     2012      08        02        215              0.150625      25.146698       0.326222       0.320301       0.221000       0.140100       0.146600       0.791000
53886     53886     hebei          113.6722       36.5675           94       175     2012      08        03        216              0.142500      25.869873       0.000000       0.309736       0.249000       0.170900       0.135400       0.811000
53886     53886     hebei          113.6722       36.5675           94       175     2012      08        04        217              0.136542      26.902069       2.072822       0.298266       0.248000   -9999.000000       0.144100   -9999.000000
53886     53886     hebei          113.6722       36.5675           94       175     2012      08        05        218              0.150958      27.382874       9.244955       0.294651       0.222500       0.193900   -9999.000000       0.988000
53886     53886     hebei          113.6722       36.5675           94       175     2012      08        06        219              0.146000      25.006012       0.000000       0.321129       0.221500   -9999.000000       0.138800   -9999.000000
53886     53886     hebei          113.6722       36.5675           94       175     2012      08        07        220              0.136792      26.900116       0.000000       0.300750       0.196000   -9999.000000   -9999.000000       0.784000
53886     53886     hebei          113.6722       36.5675           94       175     2012      08        08        221              0.128250      28.790802      10.239165       0.287697       0.195000       0.053800       0.152100   -9999.000000
53886     53886     hebei          113.6722       36.5675           94       175     2012      08        09        222              0.121875      29.332397       3.967929       0.293049       0.223000   -9999.000000       0.163800       0.976000
53886     53886     hebei          113.6722       36.5675           94       175     2012      08        10        223              0.116792      25.759949       0.000000       0.306137       0.210000       0.182300   -9999.000000       0.798000
53886     53886     hebei          113.6722       36.5675           94       175     2012      08        11        224              0.111917      26.991058       0.000000       0.285749       0.204000       0.212200       0.166300   -9999.000000
53886     53886     hebei          113.6722       36.5675           94       175     2012      08        12        225              0.108000      28.265381       2.444525       0.278390       0.237000   -9999.000000       0.149900       0.876000
53886     53886     hebei          113.6722       36.5675           94       175     2012      08        13        226              0.107167      24.259674       0.766059       0.289232       0.205000       0.244300       0.112300   -9999.000000
53886     53886     hebei          113.6722       36.5675           94       175     2012      08        14        227              0.145250      23.298248      15.755667       0.283660       0.227000   -9999.000000       0.111600       1.000000
53886     53886     hebei          113.6722       36.5675           94       175     2012      08        15        228              0.143000      21.214539       0.000000       0.327673       0.221000   -9999.000000       0.111400       0.831000
53886     53886     hebei          113.6722       36.5675           94       175     2012      08        16        229              0.132083      25.170990       0.000000       0.298409       0.187000       0.048900   -9999.000000       0.795000
53886     53886     hebei          113.6722       36.5675           94       175     2012      08        17        230              0.123792      25.932831       8.428989       0.285583       0.186000   -9999.000000       0.104800       0.720000
53886     53886     hebei          113.6722       36.5675           94       175     2012      08        18        231              0.166042      25.719208      20.934942       0.293034   -9999.000000       0.097300       0.115300   -9999.000000
53886     53886     hebei          113.6722       36.5675           94       175     2012      08        19        232              0.154958      24.151947       0.656836       0.345194   -9999.000000   -9999.000000       0.114400       0.995000
53886     53886     hebei          113.6722       36.5675           94       175     2012      08        20        233              0.144292      25.788666       0.171090       0.314797       0.201000   -9999.000000       0.189700       0.872000
53886     53886     hebei          113.6722       36.5675           94       175     2012      08        21        234              0.134375      26.169250       5.093375       0.303826       0.210500       0.125300       0.186100       0.808000
53886     53886     hebei          113.6722       36.5675           94       175     2012      08        22        235              0.123750      23.754517       0.000000       0.295336       0.225000   -9999.000000   -9999.000000   -9999.000000
53886     53886     hebei          113.6722       36.5675           94       175     2012      08        23        236              0.115292      23.483582       0.000000       0.284956       0.208000       0.174600       0.169600   -9999.000000
53886     53886     hebei          113.6722       36.5675           94       175     2012      08        24        237              0.109750      22.353058       0.000000       0.278399       0.210000       0.186400       0.191000       0.768000
53886     53886     hebei          113.6722       36.5675           94       175     2012      08        25        238              0.000000      23.124390       3.176323       0.271031       0.225000       0.184200       0.171000       0.629000
53886     53886     hebei          113.6722       36.5675           94       175     2012      08        26        239              0.099750      24.286713       0.000000       0.267009       0.234000       0.053400       0.183400       0.749000
53886     53886     hebei          113.6722       36.5675           94       175     2012      08        27        240              0.095917      25.221161       0.000000       0.261746       0.234000   -9999.000000   -9999.000000       0.613000
53886     53886     hebei          113.6722       36.5675           94       175     2012      08        28        241              0.093250      25.420380       1.821039       0.258024       0.197000       0.230300       0.170600   -9999.000000
53886     53886     hebei          113.6722       36.5675           94       175     2012      08        29        242              0.089875      26.174194       0.000000       0.262061       0.199000       0.144700       0.160200       0.640000
53886     53886     hebei          113.6722       36.5675           94       175     2012      08        30        243              0.086917      26.974426       0.000000       0.248950       0.233000   -9999.000000       0.170300       0.642000
53886     53886     hebei          113.6722       36.5675           94       175     2012      08        31        244              0.084875      27.252411       3.123475       0.240899       0.240000       0.263000       0.157300       0.649000
53886     53886     hebei          113.6722       36.5675           94       175     2012      09        01        245              0.084958      25.488007      11.012690       0.250131       0.172000   -9999.000000       0.184700       1.000000
53886     53886     hebei          113.6722       36.5675           94       175     2012      09        02        246              0.090083      23.450928       0.318523       0.303998       0.189500       0.085200   -9999.000000   -9999.000000
53886     53886     hebei          113.6722       36.5675           94       175     2012      09        03        247              0.089167      22.445923       0.000000       0.288798       0.163000       0.195100       0.148000       0.664000
53886     53886     hebei          113.6722       36.5675           94       175     2012      09        04        248              0.086750      23.547760       0.813281       0.270674       0.176000   -9999.000000       0.167000   -9999.000000
53886     53886     hebei          113.6722       36.5675           94       175     2012      09        05        249              0.090458      22.742065       5.481574       0.263656       0.193000   -9999.000000       0.166200       0.740000
53886     53886     hebei          113.6722       36.5675           94       175     2012      09        06        250              0.092000      21.972748       5.951205       0.292667       0.204000   -9999.000000       0.176200   -9999.000000
53886     53886     hebei          113.6722       36.5675           94       175     2012      09        07        251              0.093875      20.946289       0.000000       0.300534       0.188500   -9999.000000       0.172400   -9999.000000
53886     53886     hebei          113.6722       36.5675           94       175     2012      09        08        252              0.090625      22.694641       0.000000       0.284050       0.171000       0.379300   -9999.000000       0.745000
53886     53886     hebei          113.6722       36.5675           94       175     2012      09        09        253              0.087417      23.297913       0.000000       0.271643       0.168000   -9999.000000       0.153500   -9999.000000
53886     53886     hebei          113.6722       36.5675           94       175     2012      09        10        254              0.085708      23.496033      10.299049       0.259958   -9999.000000       0.144000       0.148600       1.000000
53886     53886     hebei          113.6722       36.5675           94       175     2012      09        11        255              0.092292      21.655396       0.222498       0.285730       0.209000   -9999.000000       0.133000   -9999.000000
53886     53886     hebei          113.6722       36.5675           94       175     2012      09        12        256              0.090792      22.310760       0.000000       0.293728       0.184500       0.075000       0.136600       0.786000
53886     53886     hebei          113.6722       36.5675           94       175     2012      09        13        257              0.087750      18.723724       0.000000       0.276925       0.190500       0.153500   -9999.000000       0.534000
53886     53886     hebei          113.6722       36.5675           94       175     2012      09        14        258              0.085125      19.129974       0.000000       0.266022       0.180000   -9999.000000       0.131500       0.694000
53886     53886     hebei          113.6722       36.5675           94       175     2012      09        15        259              0.084500      19.466766       0.000000       0.258598   -9999.000000       0.077600       0.130700       0.563000
53886     53886     hebei          113.6722       36.5675           94       175     2012      09        16        260              0.083208      19.533203       0.000000       0.251755       0.218000       0.171000       0.137400   -9999.000000
53886     53886     hebei          113.6722       36.5675           94       175     2012      09        17        261              0.082583      19.856232       0.000000       0.245367       0.174500       0.226400       0.081200       0.653000
53886     53886     hebei          113.6722       36.5675           94       175     2012      09        18        262              0.081583      20.520111       0.948952       0.240975       0.179500       0.145500       0.084800       0.605000
53886     53886     hebei          113.6722       36.5675           94       175     2012      09        19        263              0.080667      20.030182       1.040354       0.245832       0.180000   -9999.000000   -9999.000000       0.644000
53886     53886     hebei          113.6722       36.5675           94       175     2012      09        20        264              0.080292      19.003235       0.630642       0.250864       0.188000   -9999.000000       0.080700       0.574000
53886     53886     hebei          113.6722       36.5675           94       175     2012      09        21        265              0.079333      20.999756       1.064617       0.242291   -9999.000000       0.225000       0.093700   -9999.000000
53886     53886     hebei          113.6722       36.5675           94       175     2012      09        22        266              0.080000      18.276367       0.000000       0.252263       0.208000   -9999.000000       0.082200       0.816000
53886     53886     hebei          113.6722       36.5675           94       175     2012      09        23        267              0.079750      21.720367       0.000000       0.242691       0.191000       0.252300       0.090100       0.623000
53886     53886     hebei          113.6722       36.5675           94       175     2012      09        24        268              0.078750      22.596893       1.025164       0.236540       0.197500   -9999.000000       0.136600       0.668000
53886     53886     hebei          113.6722       36.5675           94       175     2012      09        25        269              0.078583      21.319336       1.722596       0.232274       0.205000   -9999.000000       0.158600       0.935000
53886     53886     hebei          113.6722       36.5675           94       175     2012      09        26        270              0.078833      20.907043       0.663691       0.243309       0.221000       0.277200       0.137800   -9999.000000
53886     53886     hebei          113.6722       36.5675           94       175     2012      09        27        271              0.079286      18.756622       0.000000       0.252679       0.212000   -9999.000000       0.147300       0.484000
53886     53886     hebei          113.6722       36.5675           94       175     2012      09        28        272              0.077600      19.940430       0.000000       0.236346       0.187500   -9999.000000       0.138800       0.549000
53886     53886     hebei          113.6722       36.5675           94       175     2012      09        29        273              0.077125      17.757294       0.000000       0.224897       0.202500   -9999.000000       0.145700       0.605000
53886     53886     hebei          113.6722       36.5675           94       175     2012      09        30        274              0.076542      17.769958       0.000000       0.218010       0.188000       0.039600   -9999.000000       0.488000
53886     53886     hebei          113.6722       36.5675           94       175     2012      10        01        275              0.075917      18.240326       0.611202       0.212307       0.153000   -9999.000000       0.093000   -9999.000000
53886     53886     hebei          113.6722       36.5675           94       175     2012      10        02        276              0.075750      19.427155       0.000000       0.206672       0.149000   -9999.000000       0.088800       0.556000
53886     53886     hebei          113.6722       36.5675           94       175     2012      10        03        277              0.075667      21.037109       0.000000       0.201724       0.145000   -9999.000000       0.097200   -9999.000000
53886     53886     hebei          113.6722       36.5675           94       175     2012      10        04        278              0.074833      21.726685       5.777097       0.196977       0.155500   -9999.000000       0.090600       1.000000
53886     53886     hebei          113.6722       36.5675           94       175     2012      10        05        279              0.075167      20.008545       0.000000       0.229483       0.157000       0.272500       0.100600   -9999.000000
53886     53886     hebei          113.6722       36.5675           94       175     2012      10        06        280              0.075542      18.850647       0.000000       0.240831       0.155000   -9999.000000   -9999.000000   -9999.000000
53886     53886     hebei          113.6722       36.5675           94       175     2012      10        07        281              0.075250      18.754639       0.000000       0.225984       0.152000   -9999.000000       0.088300       0.545000
53886     53886     hebei          113.6722       36.5675           94       175     2012      10        08        282              0.075250      17.985718       0.171331       0.221549       0.160000   -9999.000000       0.111900   -9999.000000
53886     53886     hebei          113.6722       36.5675           94       175     2012      10        09        283              0.075375      19.653687       0.000000       0.216270       0.145000       0.097800       0.106400       0.465000
53886     53886     hebei          113.6722       36.5675           94       175     2012      10        10        284              0.074542      17.993988       0.000000       0.207294       0.157500       0.222600       0.112500   -9999.000000
53886     53886     hebei          113.6722       36.5675           94       175     2012      10        11        285              0.074292      16.798981       0.000000       0.200988       0.127000   -9999.000000   -9999.000000       0.496000
53886     53886     hebei          113.6722       36.5675           94       175     2012      10        12        286              0.074083      18.636444       0.000000       0.198041   -9999.000000   -9999.000000       0.113800       0.631000
53886     53886     hebei          113.6722       36.5675           94       175     2012      10        13        287              0.073583      19.277405       0.000000       0.196025       0.125000       0.176600       0.103700       0.575000
53886     53886     hebei          113.6722       36.5675           94       175     2012      10        14        288              0.073083      17.690338       0.000000       0.192236       0.118000       0.114000       0.116200       0.567000
53886     53886     hebei          113.6722       36.5675           94       175     2012      10        15        289              0.072833      16.681061       2.443321       0.189427       0.138500   -9999.000000       0.106600   -9999.000000
53886     53886     hebei          113.6722       36.5675           94       175     2012      10        16        290              0.072833      15.950226       0.000000       0.205514       0.138000   -9999.000000       0.110100       0.720000
53886     53886     hebei          113.6722       36.5675           94       175     2012      10        17        291              0.071833      14.459351       0.000000       0.218717       0.128000   -9999.000000   -9999.000000       0.496000
53886     53886     hebei          113.6722       36.5675           94       175     2012      10        18        292              0.072458      13.465149       0.000000       0.207046       0.134000   -9999.000000       0.103300       0.593000
53886     53886     hebei          113.6722       36.5675           94       175     2012      10        19        293              0.071917      15.437531       0.000000       0.201020       0.133000       0.315300       0.111300       0.494000
53886     53886     hebei          113.6722       36.5675           94       175     2012      10        20        294              0.071583      16.146515       0.000000       0.197948       0.123500   -9999.000000       0.105900   -9999.000000
53886     53886     hebei          113.6722       36.5675           94       175     2012      10        21        295              0.071000      17.591034       5.142537       0.194382       0.140000       0.220500       0.102100       0.531000
53886     53886     hebei          113.6722       36.5675           94       175     2012      10        22        296              0.071750      13.011261       0.000000       0.237120   -9999.000000       0.090300       0.106200       0.511000
53886     53886     hebei          113.6722       36.5675           94       175     2012      10        23        297              0.072500      12.353516       0.000000       0.236681   -9999.000000   -9999.000000   -9999.000000       0.680000
53886     53886     hebei          113.6722       36.5675           94       175     2012      10        24        298              0.073292      12.006195       0.000000       0.228250   -9999.000000       0.135700       0.085000       0.487000
53886     53886     hebei          113.6722       36.5675           94       175     2012      10        25        299              0.000000      14.505768       0.000000       0.221097       0.116000   -9999.000000       0.102700   -9999.000000
53886     53886     hebei          113.6722       36.5675           94       175     2012      10        26        300              0.072833      14.682648       0.092312       0.215396       0.128500       0.051000       0.098100       0.305000
53886     53886     hebei          113.6722       36.5675           94       175     2012      10        27        301              0.073458      11.884827       0.000000       0.215794       0.125000   -9999.000000       0.102000       0.537000
53886     53886     hebei          113.6722       36.5675           94       175     2012      10        28        302              0.000000      15.072571       0.000000       0.211494       0.126000       0.241400   -9999.000000       0.467000
53886     53886     hebei          113.6722       36.5675           94       175     2012      10        29        303              0.073208      13.299316       0.000000       0.206952       0.133000   -9999.000000       0.085300       0.435000
53886     53886     hebei          113.6722       36.5675           94       175     2012      10        30        304              0.072333      13.768616       0.000000       0.205282       0.127000   -9999.000000       0.073600   -9999.000000
53886     53886     hebei          113.6722       36.5675           94       175     2012      10        31        305              0.071333      11.679108       0.000000       0.200960       0.131500   -9999.000000       0.087200       0.429000
53886     53886     hebei          113.6722       36.5675           94       175     2012      11        01        306              0.070917      10.811890       0.000000       0.197321       0.122000       0.087200       0.081900   -9999.000000
53886     53886     hebei          113.6722       36.5675           94       175     2012      11        02        307              0.070583      11.642578       1.666029       0.195878       0.117000   -9999.000000       0.087100       0.497000
53886     53886     hebei          113.6722       36.5675           94       175     2012      11        03        308              0.070000      12.280243       1.858930       0.198911   -9999.000000   -9999.000000   -9999.000000   -9999.000000
53886     53886     hebei          113.6722       36.5675           94       175     2012      11        04        309              0.070000       6.310516       0.000000       0.238525   -9999.000000       0.042200       0.076600       0.519000
53886     53886     hebei          113.6722       36.5675           94       175     2012      11        05        310              0.070333       5.438324       0.119296       0.224740       0.126000   -9999.000000       0.080400       0.472000
53886     53886     hebei          113.6722       36.5675           94       175     2012      11        06        311              0.071500       7.736938       0.000000       0.220270       0.132500   -9999.000000       0.075100   -9999.000000
53886     53886     hebei          113.6722       36.5675           94       175     2012      11        07        312              0.072083       9.419342       0.030356       0.216380       0.131000   -9999.000000       0.081300       0.358000
53886     53886     hebei          113.6722       36.5675           94       175     2012      11        08        313              0.072000       8.694427       0.138962       0.216096   -9999.000000       0.019600   -9999.000000   -9999.000000
53886     53886     hebei          113.6722       36.5675           94       175     2012      11        09        314              0.072583       8.559662       0.121485       0.213118       0.142000   -9999.000000   -9999.000000       0.358000
53886     53886     hebei          113.6722       36.5675           94       175     2012      11        10        315              0.072083       7.417694       0.395022       0.214130   -9999.000000   -9999.000000       0.078300       0.496000
53886     53886     hebei          113.6722       36.5675           94       175     2012      11        11        316              0.071167       5.244415       0.000000       0.218467       0.134000   -9999.000000       0.080300       0.390000
53886     53886     hebei          113.6722       36.5675           94       175     2012      11        12        317              0.071542       5.030884       0.064665       0.210914       0.124000   -9999.000000       0.075100       0.490000
53886     53886     hebei          113.6722       36.5675           94       175     2012      11        13        318              0.000000       7.126007       0.000000       0.209995       0.121000       0.104300       0.077500   -9999.000000
53886     53886     hebei          113.6722       36.5675           94       175     2012      11        14        319              0.071750       6.461823       0.000000       0.205136   -9999.000000       0.073500   -9999.000000       0.466000
53886     53886     hebei          113.6722       36.5675           94       175     2012      11        15        320              0.072000       5.626678       0.242621       0.202678       0.125000   -9999.000000       0.073400       0.409000
53886     53886     hebei          113.6722       36.5675           94       175     2012      11        16        321              0.071833       5.450958       0.559903       0.208042       0.110000       0.066700       0.073200       0.364000
53886     53886     hebei          113.6722       36.5675           94       175     2012      11        17        322              0.000000       5.115509       0.000000       0.205834       0.120000   -9999.000000       0.077300       0.408000
53886     53886     hebei          113.6722       36.5675           94       175     2012      11        18        323              0.071875       6.625427       0.000000       0.206291       0.118000   -9999.000000       0.069700   -9999.000000
53886     53886     hebei          113.6722       36.5675           94       175     2012      11        19        324              0.071583       7.882965       0.000000       0.205562       0.119000       0.031400       0.070500       0.424000
53886     53886     hebei          113.6722       36.5675           94       175     2012      11        20        325              0.071250       6.649353       0.077586       0.204338       0.116000   -9999.000000   -9999.000000       0.361000
53886     53886     hebei          113.6722       36.5675           94       175     2012      11        21        326              0.071500       6.302155       0.000000       0.205778       0.098500   -9999.000000       0.058100       0.384000
53886     53886     hebei          113.6722       36.5675           94       175     2012      11        22        327              0.070667       7.485840       0.000000       0.205820       0.104000   -9999.000000       0.069700       0.258000
53886     53886     hebei          113.6722       36.5675           94       175     2012      11        23        328              0.070250       5.191315       0.000000       0.204018       0.100000       0.169000       0.064700   -9999.000000
53886     53886     hebei          113.6722       36.5675           94       175     2012      11        24        329              0.070167       3.516693       0.000000       0.193903       0.107000       0.280500       0.070500       0.215000
53886     53886     hebei          113.6722       36.5675           94       175     2012      11        25        330              0.070083       4.700073       0.218124       0.201902   -9999.000000   -9999.000000   -9999.000000       0.290000
53886     53886     hebei          113.6722       36.5675           94       175     2012      11        26        331              0.070083       4.361237       0.171726       0.203707   -9999.000000   -9999.000000   -9999.000000       0.243000
53886     53886     hebei          113.6722       36.5675           94       175     2012      11        27        332              0.070000       3.781738       0.000000       0.196994       0.109000   -9999.000000       0.055000       0.260000
53886     53886     hebei          113.6722       36.5675           94       175     2012      11        28        333              0.069917       6.151611       0.000000       0.200290       0.100000   -9999.000000       0.063100   -9999.000000
53886     53886     hebei          113.6722       36.5675           94       175     2012      11        29        334              0.069542       3.558716       0.000000       0.189455       0.104000       0.008300       0.055600       0.165000
53886     53886     hebei          113.6722       36.5675           94       175     2012      11        30        335              0.069208       2.417572       0.000000       0.184185   -9999.000000   -9999.000000       0.063200   -9999.000000
53886     53886     hebei          113.6722       36.5675           94       175     2012      12        01        336              0.069000       0.741211       0.000000       0.177595   -9999.000000   -9999.000000   -9999.000000       0.147000
53886     53886     hebei          113.6722       36.5675           94       175     2012      12        02        337              0.069000      -0.993805       0.000000       0.168190       0.103000       0.033900       0.058700   -9999.000000
53886     53886     hebei          113.6722       36.5675           94       175     2012      12        03        338              0.068958       2.056610       0.000000       0.191612       0.100000   -9999.000000       0.062400       0.240000
53886     53886     hebei          113.6722       36.5675           94       175     2012      12        04        339              0.069042       1.192657       0.000000       0.180352       0.099000       0.292700       0.066400       0.368000
53886     53886     hebei          113.6722       36.5675           94       175     2012      12        05        340              0.068625       3.353180       0.000000       0.192073   -9999.000000   -9999.000000       0.057400   -9999.000000
53886     53886     hebei          113.6722       36.5675           94       175     2012      12        06        341              0.068625       0.745422       0.000000       0.176898   -9999.000000       0.052700       0.067000       0.360000
53886     53886     hebei          113.6722       36.5675           94       175     2012      12        07        342              0.068375       2.262482       0.000000       0.185393       0.095000       0.075600   -9999.000000   -9999.000000
53886     53886     hebei          113.6722       36.5675           94       175     2012      12        08        343              0.068167       2.123199       0.000000       0.185273       0.104000   -9999.000000       0.051300       0.311000
53886     53886     hebei          113.6722       36.5675           94       175     2012      12        09        344              0.067792      -0.276459       0.000000       0.171253       0.099000   -9999.000000       0.065100       0.253000
53886     53886     hebei          113.6722       36.5675           94       175     2012      12        10        345              0.067167      -0.046021       0.000000       0.170159       0.098000   -9999.000000       0.045800       0.260000
53886     53886     hebei          113.6722       36.5675           94       175     2012      12        11        346              0.067000      -1.314392       0.080079       0.164975   -9999.000000       0.098600       0.052400       0.395000
53886     53886     hebei          113.6722       36.5675           94       175     2012      12        12        347              0.067667      -2.498413       0.000000       0.158888   -9999.000000   -9999.000000   -9999.000000   -9999.000000
53886     53886     hebei          113.6722       36.5675           94       175     2012      12        13        348              0.068000      -1.292542       1.236761       0.164795   -9999.000000   -9999.000000       0.054100       0.220000
53886     53886     hebei          113.6722       36.5675           94       175     2012      12        14        349              0.068000      -1.774078       1.786274       0.163304       0.105000   -9999.000000       0.044500       0.150000
53886     53886     hebei          113.6722       36.5675           94       175     2012      12        15        350              0.000000      -0.301025       0.361701       0.181438   -9999.000000   -9999.000000       0.054900       0.142000
53886     53886     hebei          113.6722       36.5675           94       175     2012      12        16        351              0.068500      -0.305054       0.099240       0.182791   -9999.000000       0.120500   -9999.000000       0.335000
53886     53886     hebei          113.6722       36.5675           94       175     2012      12        17        352              0.069000       0.208160       0.322892       0.189914   -9999.000000       0.080700       0.048700   -9999.000000
53886     53886     hebei          113.6722       36.5675           94       175     2012      12        18        353              0.069000      -0.848816       0.000000       0.177247   -9999.000000   -9999.000000   -9999.000000       0.201000
53886     53886     hebei          113.6722       36.5675           94       175     2012      12        19        354              0.069000      -0.794952       2.056904       0.176207   -9999.000000       0.148800       0.046800       0.093000
53886     53886     hebei          113.6722       36.5675           94       175     2012      12        20        355              0.000000      -1.088318       0.759270       0.172706   -9999.000000       0.083000       0.049700       0.051000
53886     53886     hebei          113.6722       36.5675           94       175     2012      12        21        356              0.069000      -2.196564       0.112587       0.161749   -9999.000000   -9999.000000       0.044400       0.098000
53886     53886     hebei          113.6722       36.5675           94       175     2012      12        22        357              0.069000      -1.672760       0.310894       0.171626   -9999.000000       0.214100       0.047500   -9999.000000
53886     53886     hebei          113.6722       36.5675           94       175     2012      12        23        358              0.068708      -3.394958       0.084618       0.160748   -9999.000000   -9999.000000   -9999.000000       0.092000
53886     53886     hebei          113.6722       36.5675           94       175     2012      12        24        359              0.068167      -6.649872       0.058783       0.136395   -9999.000000       0.029600   -9999.000000       0.048000
53886     53886     hebei          113.6722       36.5675           94       175     2012      12        25        360              0.068167      -3.910889       0.088983       0.152785   -9999.000000       0.051100       0.031900       0.101000
53886     53886     hebei          113.6722       36.5675           94       175     2012      12        26        361              0.000000      -5.546356       0.090915       0.143306   -9999.000000   -9999.000000       0.049900       0.050000
53886     53886     hebei          113.6722       36.5675           94       175     2012      12        27        362              0.068300      -5.361481       0.000000       0.141295   -9999.000000   -9999.000000       0.044500   -9999.000000
53886     53886     hebei          113.6722       36.5675           94       175     2012      12        28        363              0.069000      -2.455872       0.080228       0.160115   -9999.000000   -9999.000000       0.050100       0.009000
53886     53886     hebei          113.6722       36.5675           94       175     2012      12        29        364              0.000000      -1.842255       0.000000       0.165482   -9999.000000       0.195500   -9999.000000   -9999.000000
53886     53886     hebei          113.6722       36.5675           94       175     2012      12        30        365              0.000000      -4.650177       0.000000       0.144951   -9999.000000   -9999.000000       0.043700       0.124000
53886     53886     hebei          113.6722       36.5675           94       175     2012      12        31        366              0.068867      -3.714355       0.000000       0.153067   -9999.000000   -9999.000000       0.043000   -9999.000000
