# Supplementary material for: Research on Fusing Multisatellite Soil Moisture Data Based on Bayesian Model Averaging
Source: Hindawi journal article supplement (doi:10.1155/2018/9310838), 2018-06-25
Supplement: f1 [file 9310838.f1.zip › 2012_sm00-10cm_daily_ZDB_ZHY_53888_366days_allin.txt]

53888     53888     shanxi         113.4400       36.2017           95       174     2012      01        01        001              0.000000   -9999.000000       0.000000   -9999.000000       0.065000   -9999.000000       0.036600   -9999.000000
53888     53888     shanxi         113.4400       36.2017           95       174     2012      01        02        002              0.039458      -1.575806       0.000000       0.171270   -9999.000000       0.020200       0.044400       0.133000
53888     53888     shanxi         113.4400       36.2017           95       174     2012      01        03        003              0.000000      -1.926544       0.000000       0.170136   -9999.000000       0.095200   -9999.000000       0.026000
53888     53888     shanxi         113.4400       36.2017           95       174     2012      01        04        004              0.034042      -4.127838       0.000000       0.153938   -9999.000000       0.118500       0.042200   -9999.000000
53888     53888     shanxi         113.4400       36.2017           95       174     2012      01        05        005              0.034500      -4.640930       0.000000       0.152240   -9999.000000   -9999.000000       0.043600       0.185000
53888     53888     shanxi         113.4400       36.2017           95       174     2012      01        06        006              0.033875      -4.169495       0.000000       0.157412   -9999.000000   -9999.000000       0.042700       0.061000
53888     53888     shanxi         113.4400       36.2017           95       174     2012      01        07        007              0.035833      -4.202057       0.000000       0.153077   -9999.000000       0.048300       0.044700       0.110000
53888     53888     shanxi         113.4400       36.2017           95       174     2012      01        08        008              0.000000      -2.619293       0.000000       0.160067   -9999.000000   -9999.000000       0.044400       0.093000
53888     53888     shanxi         113.4400       36.2017           95       174     2012      01        09        009              0.038667      -1.659393       0.000000       0.171063   -9999.000000       0.306400   -9999.000000   -9999.000000
53888     53888     shanxi         113.4400       36.2017           95       174     2012      01        10        010              0.038125      -0.926270       0.000000       0.177398   -9999.000000   -9999.000000       0.020800       0.106000
53888     53888     shanxi         113.4400       36.2017           95       174     2012      01        11        011              0.035958      -1.219727       0.000000       0.176154   -9999.000000       0.083800       0.037000       0.105000
53888     53888     shanxi         113.4400       36.2017           95       174     2012      01        12        012              0.037875      -2.007935       0.000000       0.167094       0.080000       0.125200       0.034700       0.129000
53888     53888     shanxi         113.4400       36.2017           95       174     2012      01        13        013              0.038667      -1.170959       0.000000       0.174811   -9999.000000   -9999.000000       0.035900       0.018000
53888     53888     shanxi         113.4400       36.2017           95       174     2012      01        14        014              0.038000      -0.809845       0.000000       0.176433   -9999.000000   -9999.000000   -9999.000000   -9999.000000
53888     53888     shanxi         113.4400       36.2017           95       174     2012      01        15        015              0.038417      -1.251282       0.000000       0.173628   -9999.000000       0.048700       0.037500       0.052000
53888     53888     shanxi         113.4400       36.2017           95       174     2012      01        16        016              0.035833      -0.657104       0.000000       0.176652   -9999.000000   -9999.000000       0.027000   -9999.000000
53888     53888     shanxi         113.4400       36.2017           95       174     2012      01        17        017              0.000000      -1.616058       0.000000       0.171312   -9999.000000   -9999.000000       0.034000       0.050000
53888     53888     shanxi         113.4400       36.2017           95       174     2012      01        18        018              0.039542      -0.171661       0.000000       0.182079   -9999.000000       0.073300       0.032700   -9999.000000
53888     53888     shanxi         113.4400       36.2017           95       174     2012      01        19        019              0.042292      -0.919861       1.676377       0.175583   -9999.000000   -9999.000000       0.033900       0.049000
53888     53888     shanxi         113.4400       36.2017           95       174     2012      01        20        020              0.039667       0.045654       0.000000       0.184674   -9999.000000   -9999.000000   -9999.000000       0.050000
53888     53888     shanxi         113.4400       36.2017           95       174     2012      01        21        021              0.035875      -3.150208       0.044725       0.159413   -9999.000000   -9999.000000       0.027000   -9999.000000
53888     53888     shanxi         113.4400       36.2017           95       174     2012      01        22        022              0.033833      -5.875183       0.000000       0.140899   -9999.000000       0.045500       0.027700       0.045000
53888     53888     shanxi         113.4400       36.2017           95       174     2012      01        23        023              0.032500      -5.301147       0.000000       0.143987   -9999.000000   -9999.000000       0.031300   -9999.000000
53888     53888     shanxi         113.4400       36.2017           95       174     2012      01        24        024              0.031083      -5.269196       0.000000       0.146611   -9999.000000   -9999.000000   -9999.000000       0.037000
53888     53888     shanxi         113.4400       36.2017           95       174     2012      01        25        025              0.032417      -5.492859       0.000000       0.145684   -9999.000000   -9999.000000       0.032300       0.053000
53888     53888     shanxi         113.4400       36.2017           95       174     2012      01        26        026              0.036042      -3.864349       0.000000       0.156797   -9999.000000   -9999.000000   -9999.000000       0.033000
53888     53888     shanxi         113.4400       36.2017           95       174     2012      01        27        027              0.035750      -1.133240       0.000000       0.173747   -9999.000000       0.153700       0.023300       0.157000
53888     53888     shanxi         113.4400       36.2017           95       174     2012      01        28        028              0.037583      -1.859924       0.000000       0.169927       0.089000       0.040500       0.034800   -9999.000000
53888     53888     shanxi         113.4400       36.2017           95       174     2012      01        29        029              0.036375      -0.362488       0.000000       0.177653   -9999.000000   -9999.000000       0.034700       0.002000
53888     53888     shanxi         113.4400       36.2017           95       174     2012      01        30        030              0.039083      -2.521057       0.000000       0.161212   -9999.000000   -9999.000000       0.034700       0.064000
53888     53888     shanxi         113.4400       36.2017           95       174     2012      01        31        031              0.044208      -0.516815       0.000000       0.177656   -9999.000000   -9999.000000   -9999.000000       0.138000
53888     53888     shanxi         113.4400       36.2017           95       174     2012      02        01        032              0.037708       0.844147       0.000000       0.183375   -9999.000000   -9999.000000       0.035000       0.095000
53888     53888     shanxi         113.4400       36.2017           95       174     2012      02        02        033              0.035667      -2.912231       0.000000       0.165606   -9999.000000       0.016800       0.031300   -9999.000000
53888     53888     shanxi         113.4400       36.2017           95       174     2012      02        03        034              0.039125      -2.379791       0.000000       0.164740       0.080000   -9999.000000       0.036400       0.066000
53888     53888     shanxi         113.4400       36.2017           95       174     2012      02        04        035              0.038458       0.035095       0.000000       0.179588   -9999.000000       0.043300       0.037200       0.048000
53888     53888     shanxi         113.4400       36.2017           95       174     2012      02        05        036              0.041875      -0.617004       0.000000       0.176575   -9999.000000       0.038100       0.040600       0.109000
53888     53888     shanxi         113.4400       36.2017           95       174     2012      02        06        037              0.038250       1.196869       0.000000       0.190116   -9999.000000   -9999.000000   -9999.000000       0.089000
53888     53888     shanxi         113.4400       36.2017           95       174     2012      02        07        038              0.034000      -0.952667       0.000000       0.178184   -9999.000000       0.030800       0.036100   -9999.000000
53888     53888     shanxi         113.4400       36.2017           95       174     2012      02        08        039              0.031500      -2.777985       0.000000       0.161676   -9999.000000       0.031200       0.044100       0.084000
53888     53888     shanxi         113.4400       36.2017           95       174     2012      02        09        040              0.032833      -4.188721       0.000000       0.150633   -9999.000000       0.074400       0.041600       0.106000
53888     53888     shanxi         113.4400       36.2017           95       174     2012      02        10        041              0.035292      -3.048615       0.000000       0.157831   -9999.000000   -9999.000000       0.039800       0.140000
53888     53888     shanxi         113.4400       36.2017           95       174     2012      02        11        042              0.039417      -1.108368       0.000000       0.171817   -9999.000000   -9999.000000       0.043700       0.087000
53888     53888     shanxi         113.4400       36.2017           95       174     2012      02        12        043              0.037208       1.168030       0.000000       0.182840   -9999.000000       0.053600   -9999.000000   -9999.000000
53888     53888     shanxi         113.4400       36.2017           95       174     2012      02        13        044              0.037917      -0.340088       0.000000       0.178297   -9999.000000       0.028000   -9999.000000       0.039000
53888     53888     shanxi         113.4400       36.2017           95       174     2012      02        14        045              0.044292       0.643311       0.000000       0.185401   -9999.000000   -9999.000000       0.049400   -9999.000000
53888     53888     shanxi         113.4400       36.2017           95       174     2012      02        15        046              0.042625       1.825989       0.000000       0.190845   -9999.000000   -9999.000000       0.046100       0.205000
53888     53888     shanxi         113.4400       36.2017           95       174     2012      02        16        047              0.041042       1.258789       0.000000       0.189786   -9999.000000   -9999.000000       0.045200   -9999.000000
53888     53888     shanxi         113.4400       36.2017           95       174     2012      02        17        048              0.037458       0.453735       0.000000       0.181517   -9999.000000       0.151700   -9999.000000       0.023000
53888     53888     shanxi         113.4400       36.2017           95       174     2012      02        18        049              0.037458      -0.711914       0.000000       0.172962       0.079000       0.028000       0.044400       0.113000
53888     53888     shanxi         113.4400       36.2017           95       174     2012      02        19        050              0.041417      -1.035065       0.000000       0.170732       0.072000   -9999.000000       0.037200   -9999.000000
53888     53888     shanxi         113.4400       36.2017           95       174     2012      02        20        051              0.049417       1.340027       0.000000       0.178907       0.075000   -9999.000000       0.045800       0.230000
53888     53888     shanxi         113.4400       36.2017           95       174     2012      02        21        052              0.053792       3.482788       0.000000       0.192028   -9999.000000       0.061600   -9999.000000   -9999.000000
53888     53888     shanxi         113.4400       36.2017           95       174     2012      02        22        053              0.060500       3.331573       0.000000       0.190983   -9999.000000   -9999.000000       0.045400       0.138000
53888     53888     shanxi         113.4400       36.2017           95       174     2012      02        23        054              0.063625       5.809540       0.000000       0.201411       0.065000       0.052400   -9999.000000       0.211000
53888     53888     shanxi         113.4400       36.2017           95       174     2012      02        24        055              0.060667       2.018799       0.000000       0.186919   -9999.000000   -9999.000000       0.038300       0.170000
53888     53888     shanxi         113.4400       36.2017           95       174     2012      02        25        056              0.049250       2.366119       0.000000       0.189547   -9999.000000   -9999.000000       0.044200       0.114000
53888     53888     shanxi         113.4400       36.2017           95       174     2012      02        26        057              0.040375      -0.426575       0.275497       0.176115   -9999.000000       0.072800       0.041200   -9999.000000
53888     53888     shanxi         113.4400       36.2017           95       174     2012      02        27        058              0.043667       0.720428       0.000000       0.179972   -9999.000000   -9999.000000   -9999.000000       0.066000
53888     53888     shanxi         113.4400       36.2017           95       174     2012      02        28        059              0.050083       3.049133       0.000000       0.190935       0.065000       0.045700       0.038200       0.204000
53888     53888     shanxi         113.4400       36.2017           95       174     2012      02        29        060              0.000000   -9999.000000       0.000000   -9999.000000       0.077000   -9999.000000   -9999.000000   -9999.000000
53888     53888     shanxi         113.4400       36.2017           95       174     2012      03        01        061              0.059417       3.858063       0.154853       0.193992   -9999.000000   -9999.000000       0.020400       0.230000
53888     53888     shanxi         113.4400       36.2017           95       174     2012      03        02        062              0.064208       2.234985       0.249966       0.194341   -9999.000000   -9999.000000       0.037100   -9999.000000
53888     53888     shanxi         113.4400       36.2017           95       174     2012      03        03        063              0.058125       1.812653       0.000000       0.189435   -9999.000000   -9999.000000       0.036500       0.062000
53888     53888     shanxi         113.4400       36.2017           95       174     2012      03        04        064              0.059333       0.593964       0.000000       0.180607       0.095000       0.022400       0.043300       0.316000
53888     53888     shanxi         113.4400       36.2017           95       174     2012      03        05        065              0.064292       2.500031       0.000000       0.190788       0.104000   -9999.000000   -9999.000000       0.270000
53888     53888     shanxi         113.4400       36.2017           95       174     2012      03        06        066              0.066000       3.737976       0.152576       0.197471       0.087000   -9999.000000       0.043900       0.151000
53888     53888     shanxi         113.4400       36.2017           95       174     2012      03        07        067              0.000000       3.366516       0.104815       0.191885       0.088000       0.012900       0.035000   -9999.000000
53888     53888     shanxi         113.4400       36.2017           95       174     2012      03        08        068              0.064250       6.124023       0.294537       0.197685   -9999.000000   -9999.000000       0.042600       0.128000
53888     53888     shanxi         113.4400       36.2017           95       174     2012      03        09        069              0.059375       3.198181       0.000000       0.186435   -9999.000000       0.098000       0.045300       0.221000
53888     53888     shanxi         113.4400       36.2017           95       174     2012      03        10        070              0.061458       4.962372       0.000000       0.192058       0.083000       0.190200       0.050100       0.208000
53888     53888     shanxi         113.4400       36.2017           95       174     2012      03        11        071              0.057458       6.270294       0.000000       0.187292       0.080000   -9999.000000   -9999.000000       0.078000
53888     53888     shanxi         113.4400       36.2017           95       174     2012      03        12        072              0.055000       3.708191       0.000000       0.179332       0.077000   -9999.000000       0.036200   -9999.000000
53888     53888     shanxi         113.4400       36.2017           95       174     2012      03        13        073              0.059375       5.286560       0.000000       0.185466   -9999.000000   -9999.000000       0.045800       0.327000
53888     53888     shanxi         113.4400       36.2017           95       174     2012      03        14        074              0.063652       9.319946       0.000000       0.186987   -9999.000000       0.087200   -9999.000000   -9999.000000
53888     53888     shanxi         113.4400       36.2017           95       174     2012      03        15        075              0.090792       7.505615       0.320008       0.183888       0.088000       0.040400       0.051200       0.309000
53888     53888     shanxi         113.4400       36.2017           95       174     2012      03        16        076              0.096208       5.054626       0.000000       0.186799       0.077000   -9999.000000       0.050400   -9999.000000
53888     53888     shanxi         113.4400       36.2017           95       174     2012      03        17        077              0.100958       9.644867       0.000000       0.186096       0.076000       0.036800   -9999.000000       0.263000
53888     53888     shanxi         113.4400       36.2017           95       174     2012      03        18        078              0.102042      12.817566       0.512054       0.180419   -9999.000000   -9999.000000       0.028400       0.132000
53888     53888     shanxi         113.4400       36.2017           95       174     2012      03        19        079              0.113667       3.899384       0.116568       0.179337   -9999.000000   -9999.000000       0.056400   -9999.000000
53888     53888     shanxi         113.4400       36.2017           95       174     2012      03        20        080              0.119250       2.497223       0.337672       0.183256       0.073000       0.018800       0.055400       0.267000
53888     53888     shanxi         113.4400       36.2017           95       174     2012      03        21        081              0.115500       6.051666       0.459440       0.190065   -9999.000000   -9999.000000       0.068000   -9999.000000
53888     53888     shanxi         113.4400       36.2017           95       174     2012      03        22        082              0.119333       3.086975       1.447818       0.192505   -9999.000000       0.003800   -9999.000000       0.438000
53888     53888     shanxi         113.4400       36.2017           95       174     2012      03        23        083              0.135542       3.566925       0.145622       0.208772   -9999.000000   -9999.000000       0.049800       0.369000
53888     53888     shanxi         113.4400       36.2017           95       174     2012      03        24        084              0.137500       6.593781       0.000000       0.204702   -9999.000000   -9999.000000   -9999.000000       0.440000
53888     53888     shanxi         113.4400       36.2017           95       174     2012      03        25        085              0.000000      10.715973       0.000000       0.194339       0.086000       0.063900       0.054600       0.401000
53888     53888     shanxi         113.4400       36.2017           95       174     2012      03        26        086              0.125292      11.954895       0.000000       0.185212       0.086000   -9999.000000       0.058000   -9999.000000
53888     53888     shanxi         113.4400       36.2017           95       174     2012      03        27        087              0.117833      14.133789       0.000000       0.177639       0.080000       0.131400       0.060700       0.455000
53888     53888     shanxi         113.4400       36.2017           95       174     2012      03        28        088              0.113583      15.129333       0.010148       0.171137       0.081000       0.272500   -9999.000000       0.474000
53888     53888     shanxi         113.4400       36.2017           95       174     2012      03        29        089              0.112083      15.451599       0.000000       0.168380       0.074000   -9999.000000       0.044700       0.410000
53888     53888     shanxi         113.4400       36.2017           95       174     2012      03        30        090              0.107125      16.030548       1.493581       0.167226   -9999.000000   -9999.000000       0.051100       0.223000
53888     53888     shanxi         113.4400       36.2017           95       174     2012      03        31        091              0.106417      12.014984       0.000000       0.165864       0.073000   -9999.000000       0.048900   -9999.000000
53888     53888     shanxi         113.4400       36.2017           95       174     2012      04        01        092              0.106958      14.868225       0.000000       0.163172       0.084000   -9999.000000       0.056400       0.422000
53888     53888     shanxi         113.4400       36.2017           95       174     2012      04        02        093              0.103542      14.262390       0.180778       0.162301       0.081000       0.119700       0.061300       0.358000
53888     53888     shanxi         113.4400       36.2017           95       174     2012      04        03        094              0.103792       7.871185       0.000000       0.166821       0.083000   -9999.000000   -9999.000000       0.396000
53888     53888     shanxi         113.4400       36.2017           95       174     2012      04        04        095              0.104083      13.216797       0.000000       0.164928       0.082000       0.027900       0.030300       0.314000
53888     53888     shanxi         113.4400       36.2017           95       174     2012      04        05        096              0.102625      16.389771       0.000000       0.161238       0.074500   -9999.000000       0.055700   -9999.000000
53888     53888     shanxi         113.4400       36.2017           95       174     2012      04        06        097              0.101292      16.552063       0.000000       0.159389       0.079000       0.113200       0.049400       0.326000
53888     53888     shanxi         113.4400       36.2017           95       174     2012      04        07        098              0.100708      17.299652       0.000000       0.158452       0.072000   -9999.000000       0.052500       0.470000
53888     53888     shanxi         113.4400       36.2017           95       174     2012      04        08        099              0.099583      18.910400       0.000000       0.157505   -9999.000000   -9999.000000   -9999.000000       0.386000
53888     53888     shanxi         113.4400       36.2017           95       174     2012      04        09        100              0.097708      20.234924       1.021053       0.156823       0.090000       0.064900       0.066900       0.402000
53888     53888     shanxi         113.4400       36.2017           95       174     2012      04        10        101              0.104333      17.952087       6.895365       0.163483       0.086000   -9999.000000       0.060800   -9999.000000
53888     53888     shanxi         113.4400       36.2017           95       174     2012      04        11        102              0.103708      16.890442       4.015954       0.237648       0.112500   -9999.000000       0.077100       0.318000
53888     53888     shanxi         113.4400       36.2017           95       174     2012      04        12        103              0.111292      16.215179       0.000000       0.238863       0.117000       0.070400       0.069200   -9999.000000
53888     53888     shanxi         113.4400       36.2017           95       174     2012      04        13        104              0.107500      13.446930       2.210079       0.241633       0.091000   -9999.000000       0.059900       0.447000
53888     53888     shanxi         113.4400       36.2017           95       174     2012      04        14        105              0.103167      17.818329       0.000000       0.216057       0.090000       0.089700   -9999.000000   -9999.000000
53888     53888     shanxi         113.4400       36.2017           95       174     2012      04        15        106              0.102208      17.426361       0.000000       0.201385       0.089000       0.230400       0.043400       0.266000
53888     53888     shanxi         113.4400       36.2017           95       174     2012      04        16        107              0.100375      20.259369       0.000000       0.187266       0.090000   -9999.000000       0.064800       0.311000
53888     53888     shanxi         113.4400       36.2017           95       174     2012      04        17        108              0.098583      17.821930       0.213403       0.178868       0.076000       0.058800       0.053300   -9999.000000
53888     53888     shanxi         113.4400       36.2017           95       174     2012      04        18        109              0.096292      19.892914       0.089648       0.175270       0.083000   -9999.000000   -9999.000000       0.431000
53888     53888     shanxi         113.4400       36.2017           95       174     2012      04        19        110              0.099708      20.686859       1.442297       0.171023       0.092000       0.154400   -9999.000000   -9999.000000
53888     53888     shanxi         113.4400       36.2017           95       174     2012      04        20        111              0.107875      21.325256       4.156550       0.175579       0.100000       0.290300       0.068100       0.344000
53888     53888     shanxi         113.4400       36.2017           95       174     2012      04        21        112              0.114333      17.329224       1.269971       0.214909       0.106500   -9999.000000       0.050300       0.372000
53888     53888     shanxi         113.4400       36.2017           95       174     2012      04        22        113              0.110875      18.063110       0.000000       0.230621       0.102500       0.033100       0.064600       0.453000
53888     53888     shanxi         113.4400       36.2017           95       174     2012      04        23        114              0.108875      22.283173       1.995605       0.206472       0.092000   -9999.000000       0.068800       0.343000
53888     53888     shanxi         113.4400       36.2017           95       174     2012      04        24        115              0.149250      24.181580       8.108742       0.200899       0.130000       0.319500       0.106700   -9999.000000
53888     53888     shanxi         113.4400       36.2017           95       174     2012      04        25        116              0.000000      14.767242       0.000000       0.270366       0.120000       0.113800   -9999.000000       0.838000
53888     53888     shanxi         113.4400       36.2017           95       174     2012      04        26        117              0.124542      15.587067       0.174609       0.238980       0.092000   -9999.000000       0.073200       0.433000
53888     53888     shanxi         113.4400       36.2017           95       174     2012      04        27        118              0.120250      20.771973       4.714714       0.215152       0.091500       0.076000   -9999.000000       0.467000
53888     53888     shanxi         113.4400       36.2017           95       174     2012      04        28        119              0.117417      22.372833       0.000000       0.194425       0.082000   -9999.000000       0.079100       0.204000
53888     53888     shanxi         113.4400       36.2017           95       174     2012      04        29        120              0.114583      19.752808       0.339941       0.182390       0.089000       0.147200       0.066100   -9999.000000
53888     53888     shanxi         113.4400       36.2017           95       174     2012      04        30        121              0.112208      20.765411       0.284375       0.175888       0.097000       0.152600       0.081400       0.296000
53888     53888     shanxi         113.4400       36.2017           95       174     2012      05        01        122              0.110583      23.347870       0.000000       0.171455       0.112500   -9999.000000   -9999.000000       0.304000
53888     53888     shanxi         113.4400       36.2017           95       174     2012      05        02        123              0.107958      21.628845       0.000000       0.170360       0.120500       0.058500       0.063500       0.395000
53888     53888     shanxi         113.4400       36.2017           95       174     2012      05        03        124              0.104250      23.784485       0.000000       0.166489       0.104000       0.296400       0.081000       0.263000
53888     53888     shanxi         113.4400       36.2017           95       174     2012      05        04        125              0.100083      24.464630       0.000000       0.162663       0.103000   -9999.000000       0.072700   -9999.000000
53888     53888     shanxi         113.4400       36.2017           95       174     2012      05        05        126              0.095375      26.541199       0.000000       0.159685       0.114000   -9999.000000       0.075000       0.257000
53888     53888     shanxi         113.4400       36.2017           95       174     2012      05        06        127              0.091375      26.073730       0.159407       0.158948       0.107000   -9999.000000   -9999.000000       0.475000
53888     53888     shanxi         113.4400       36.2017           95       174     2012      05        07        128              0.085458      28.161255       0.058456       0.157430   -9999.000000       0.153300       0.092000       0.347000
53888     53888     shanxi         113.4400       36.2017           95       174     2012      05        08        129              0.082792      26.167572       0.544090       0.158094       0.106000   -9999.000000       0.070400       0.217000
53888     53888     shanxi         113.4400       36.2017           95       174     2012      05        09        130              0.078208      25.996552       0.757215       0.158311       0.101000   -9999.000000       0.097600   -9999.000000
53888     53888     shanxi         113.4400       36.2017           95       174     2012      05        10        131              0.076750      24.809418       0.000000       0.166406       0.108000   -9999.000000       0.082300       0.323000
53888     53888     shanxi         113.4400       36.2017           95       174     2012      05        11        132              0.076167      27.500580       1.849407       0.161505       0.161000   -9999.000000       0.083400   -9999.000000
53888     53888     shanxi         113.4400       36.2017           95       174     2012      05        12        133              0.074833      25.171326       0.000000       0.171116       0.128500       0.144800   -9999.000000       0.215000
53888     53888     shanxi         113.4400       36.2017           95       174     2012      05        13        134              0.078625      20.429688       0.000000       0.176802       0.119000       0.065900       0.076800   -9999.000000
53888     53888     shanxi         113.4400       36.2017           95       174     2012      05        14        135              0.076375      23.150330       0.000000       0.163068       0.111000   -9999.000000       0.103600       0.191000
53888     53888     shanxi         113.4400       36.2017           95       174     2012      05        15        136              0.074522      22.442169       0.000000       0.156421   -9999.000000       0.027800       0.108000       0.193000
53888     53888     shanxi         113.4400       36.2017           95       174     2012      05        16        137              0.072500      23.398926       0.000000       0.153831       0.116000   -9999.000000       0.095200   -9999.000000
53888     53888     shanxi         113.4400       36.2017           95       174     2012      05        17        138              0.072042      23.938446       0.000000       0.152647       0.104500       0.104900       0.097900       0.444000
53888     53888     shanxi         113.4400       36.2017           95       174     2012      05        18        139              0.068792      26.477020       0.000000       0.151674       0.120500       0.021600   -9999.000000   -9999.000000
53888     53888     shanxi         113.4400       36.2017           95       174     2012      05        19        140              0.065958      27.717377       0.177348       0.151515       0.105000   -9999.000000       0.072400       0.281000
53888     53888     shanxi         113.4400       36.2017           95       174     2012      05        20        141              0.065500      26.884521       0.000000       0.152828       0.113000       0.104600       0.101500       0.363000
53888     53888     shanxi         113.4400       36.2017           95       174     2012      05        21        142              0.060875      27.337463       0.150032       0.151882       0.116000       0.087900       0.090200       0.331000
53888     53888     shanxi         113.4400       36.2017           95       174     2012      05        22        143              0.059833      21.808777       0.330792       0.154389       0.123500   -9999.000000       0.094600       0.326000
53888     53888     shanxi         113.4400       36.2017           95       174     2012      05        23        144              0.064958      21.965057      10.262315       0.158984   -9999.000000       0.072600   -9999.000000   -9999.000000
53888     53888     shanxi         113.4400       36.2017           95       174     2012      05        24        145              0.074542      22.466522       0.074451       0.220907       0.137000   -9999.000000       0.113500       0.777000
53888     53888     shanxi         113.4400       36.2017           95       174     2012      05        25        146              0.000000      20.004364       0.000000       0.240408       0.121000       0.159900       0.087100       0.401000
53888     53888     shanxi         113.4400       36.2017           95       174     2012      05        26        147              0.080125      23.798401       0.304965       0.207050       0.117000       0.148500       0.098400       0.399000
53888     53888     shanxi         113.4400       36.2017           95       174     2012      05        27        148              0.078250      24.269623       0.000000       0.185260       0.120000       0.175900       0.091400       0.294000
53888     53888     shanxi         113.4400       36.2017           95       174     2012      05        28        149              0.074167      26.702148       0.498497       0.170706       0.113000       0.063200       0.092000   -9999.000000
53888     53888     shanxi         113.4400       36.2017           95       174     2012      05        29        150              0.068500      26.545593       0.672173       0.165013       0.132000   -9999.000000   -9999.000000       0.493000
53888     53888     shanxi         113.4400       36.2017           95       174     2012      05        30        151              0.070417      22.472412       0.169293       0.176430       0.115000       0.058900       0.086700   -9999.000000
53888     53888     shanxi         113.4400       36.2017           95       174     2012      05        31        152              0.067667      24.800903       0.000000       0.164065       0.126000       0.068900   -9999.000000   -9999.000000
53888     53888     shanxi         113.4400       36.2017           95       174     2012      06        01        153              0.070750      25.073761       9.591573       0.158685       0.147000   -9999.000000       0.088300       0.865000
53888     53888     shanxi         113.4400       36.2017           95       174     2012      06        02        154              0.083208      23.946991       1.126274       0.230329       0.144000       0.218100       0.105900   -9999.000000
53888     53888     shanxi         113.4400       36.2017           95       174     2012      06        03        155              0.082667      22.779510       0.000000       0.240468       0.137500   -9999.000000       0.101900       0.340000
53888     53888     shanxi         113.4400       36.2017           95       174     2012      06        04        156              0.080625      24.114044       0.000000       0.213019       0.111000       0.030800   -9999.000000       0.328000
53888     53888     shanxi         113.4400       36.2017           95       174     2012      06        05        157              0.074958      26.307892       0.438330       0.186592   -9999.000000       0.165900       0.093100       0.313000
53888     53888     shanxi         113.4400       36.2017           95       174     2012      06        06        158              0.066083      26.670380       0.000000       0.175535       0.118000   -9999.000000       0.132500       0.208000
53888     53888     shanxi         113.4400       36.2017           95       174     2012      06        07        159              0.067833      21.422852       0.539646       0.174312       0.116000       0.094500       0.121700   -9999.000000
53888     53888     shanxi         113.4400       36.2017           95       174     2012      06        08        160              0.068250      26.433655       0.000000       0.169100       0.123000       0.020700       0.131200       0.384000
53888     53888     shanxi         113.4400       36.2017           95       174     2012      06        09        161              0.068542      27.143433       0.342658       0.162803       0.103000   -9999.000000   -9999.000000   -9999.000000
53888     53888     shanxi         113.4400       36.2017           95       174     2012      06        10        162              0.063125      29.747040       0.394435       0.156777       0.113000       0.063700       0.135400       0.327000
53888     53888     shanxi         113.4400       36.2017           95       174     2012      06        11        163              0.000000      26.247742       0.000000       0.160698       0.108000   -9999.000000       0.128900   -9999.000000
53888     53888     shanxi         113.4400       36.2017           95       174     2012      06        12        164              0.060667      27.734589       0.000000       0.153116       0.103000       0.138400       0.148500       0.259000
53888     53888     shanxi         113.4400       36.2017           95       174     2012      06        13        165              0.058917      29.167816       0.764735       0.150329       0.117000       0.186200       0.139800       0.450000
53888     53888     shanxi         113.4400       36.2017           95       174     2012      06        14        166              0.054667      31.108704       0.000000       0.149066       0.107000   -9999.000000       0.142000   -9999.000000
53888     53888     shanxi         113.4400       36.2017           95       174     2012      06        15        167              0.051708      28.591156       0.000000       0.148551       0.106000       0.182300   -9999.000000       0.431000
53888     53888     shanxi         113.4400       36.2017           95       174     2012      06        16        168              0.050167      28.367188       0.000000       0.148095       0.113000   -9999.000000       0.124400   -9999.000000
53888     53888     shanxi         113.4400       36.2017           95       174     2012      06        17        169              0.046375      29.988800       0.000000       0.147387       0.107000   -9999.000000       0.153700       0.400000
53888     53888     shanxi         113.4400       36.2017           95       174     2012      06        18        170              0.045458      31.327576       1.179741       0.146597       0.104500       0.019800       0.122100       0.489000
53888     53888     shanxi         113.4400       36.2017           95       174     2012      06        19        171              0.042333      31.622620       2.961019       0.146111       0.114000   -9999.000000       0.126500       0.471000
53888     53888     shanxi         113.4400       36.2017           95       174     2012      06        20        172              0.040792      32.218842       0.770610       0.145571       0.081000       0.092900       0.131700       0.458000
53888     53888     shanxi         113.4400       36.2017           95       174     2012      06        21        173              0.038917      30.185608       1.472589       0.145516       0.119000   -9999.000000   -9999.000000   -9999.000000
53888     53888     shanxi         113.4400       36.2017           95       174     2012      06        22        174              0.039083      28.307953       0.343683       0.160143   -9999.000000   -9999.000000       0.097900       0.412000
53888     53888     shanxi         113.4400       36.2017           95       174     2012      06        23        175              0.036167      30.614960       0.555678       0.153823       0.136000       0.054400       0.149400       0.541000
53888     53888     shanxi         113.4400       36.2017           95       174     2012      06        24        176              0.046542      26.866119      15.551406       0.155804       0.152500   -9999.000000       0.155700       0.505000
53888     53888     shanxi         113.4400       36.2017           95       174     2012      06        25        177              0.071583      24.229309       4.465626       0.278579   -9999.000000       0.039500       0.163300       0.939000
53888     53888     shanxi         113.4400       36.2017           95       174     2012      06        26        178              0.093583      24.630676       9.384575       0.272688   -9999.000000       0.071300   -9999.000000   -9999.000000
53888     53888     shanxi         113.4400       36.2017           95       174     2012      06        27        179              0.115583      24.921783       0.342645       0.279270       0.161000   -9999.000000       0.160000       0.771000
53888     53888     shanxi         113.4400       36.2017           95       174     2012      06        28        180              0.110333      22.461670      21.020905       0.271104       0.134000       0.326500       0.169300       0.613000
53888     53888     shanxi         113.4400       36.2017           95       174     2012      06        29        181              0.155833      23.569000      15.059450       0.273480       0.171000   -9999.000000       0.174600       1.000000
53888     53888     shanxi         113.4400       36.2017           95       174     2012      06        30        182              0.136500      22.151733       1.931007       0.334545       0.132000   -9999.000000       0.153500   -9999.000000
53888     53888     shanxi         113.4400       36.2017           95       174     2012      07        01        183              0.124333      25.990021       2.988535       0.294501       0.141000       0.163900       0.140400   -9999.000000
53888     53888     shanxi         113.4400       36.2017           95       174     2012      07        02        184              0.115667      27.738922       0.874890       0.274361       0.152000   -9999.000000   -9999.000000       0.711000
53888     53888     shanxi         113.4400       36.2017           95       174     2012      07        03        185              0.112167      27.748749       0.000000       0.261159       0.134000       0.284500       0.138900       0.620000
53888     53888     shanxi         113.4400       36.2017           95       174     2012      07        04        186              0.104833      28.963837       3.055257       0.244803       0.176000   -9999.000000       0.166900       0.683000
53888     53888     shanxi         113.4400       36.2017           95       174     2012      07        05        187              0.108375      24.908081       0.000000       0.255643       0.121000   -9999.000000       0.147700       0.307000
53888     53888     shanxi         113.4400       36.2017           95       174     2012      07        06        188              0.106667      26.541931       0.000000       0.245276   -9999.000000       0.136000       0.152700   -9999.000000
53888     53888     shanxi         113.4400       36.2017           95       174     2012      07        07        189              0.105913      28.190582       5.210265       0.227659   -9999.000000   -9999.000000   -9999.000000       0.882000
53888     53888     shanxi         113.4400       36.2017           95       174     2012      07        08        190              0.123208      24.657776      24.092596       0.261090   -9999.000000       0.135000   -9999.000000   -9999.000000
53888     53888     shanxi         113.4400       36.2017           95       174     2012      07        09        191              0.177625      26.338104      53.779915       0.291140       0.220000   -9999.000000       0.169100       1.000000
53888     53888     shanxi         113.4400       36.2017           95       174     2012      07        10        192              0.162042      24.148590       0.505306       0.372783       0.160000       0.170600       0.194500   -9999.000000
53888     53888     shanxi         113.4400       36.2017           95       174     2012      07        11        193              0.150125      27.347137       1.821596       0.328949       0.146000       0.188200       0.176000       1.000000
53888     53888     shanxi         113.4400       36.2017           95       174     2012      07        12        194              0.138958      27.874969       1.499777       0.310836   -9999.000000   -9999.000000       0.179400       0.687000
53888     53888     shanxi         113.4400       36.2017           95       174     2012      07        13        195              0.143667      28.717773      33.406754       0.296339       0.191000       0.149600   -9999.000000   -9999.000000
53888     53888     shanxi         113.4400       36.2017           95       174     2012      07        14        196              0.169583      24.298950       6.600986       0.336747       0.165500       0.153300       0.196700       0.745000
53888     53888     shanxi         113.4400       36.2017           95       174     2012      07        15        197              0.157583      22.299927       2.724987       0.342940       0.178000   -9999.000000       0.185600   -9999.000000
53888     53888     shanxi         113.4400       36.2017           95       174     2012      07        16        198              0.150375      24.577423       0.000000       0.322521       0.156000       0.336000       0.152600       0.903000
53888     53888     shanxi         113.4400       36.2017           95       174     2012      07        17        199              0.199708      24.556488       0.000000       0.309780       0.146000   -9999.000000       0.141300       0.710000
53888     53888     shanxi         113.4400       36.2017           95       174     2012      07        18        200              0.232833      25.045990       0.000000       0.301176       0.164000       0.191800       0.140800       0.711000
53888     53888     shanxi         113.4400       36.2017           95       174     2012      07        19        201              0.228208      25.783752       0.000000       0.294479       0.160000       0.226300   -9999.000000       0.607000
53888     53888     shanxi         113.4400       36.2017           95       174     2012      07        20        202              0.233522      26.687225       0.965385       0.287895       0.142500   -9999.000000       0.120200   -9999.000000
53888     53888     shanxi         113.4400       36.2017           95       174     2012      07        21        203              0.240609      27.729187       4.306574       0.285916       0.194500       0.033300       0.144700       0.656000
53888     53888     shanxi         113.4400       36.2017           95       174     2012      07        22        204              0.247125      27.309143       0.477915       0.295073       0.164000   -9999.000000       0.134300       0.787000
53888     53888     shanxi         113.4400       36.2017           95       174     2012      07        23        205              0.236458      25.226959       6.283632       0.290729       0.185000       0.255000       0.108600       0.835000
53888     53888     shanxi         113.4400       36.2017           95       174     2012      07        24        206              0.228417      25.514923       0.070296       0.280335       0.191000       0.112600   -9999.000000       0.557000
53888     53888     shanxi         113.4400       36.2017           95       174     2012      07        25        207              0.223458      27.310974       0.607400       0.271620       0.157000   -9999.000000       0.111500   -9999.000000
53888     53888     shanxi         113.4400       36.2017           95       174     2012      07        26        208              0.217667      29.307953       0.136753       0.265913       0.176500       0.139600       0.096400       0.462000
53888     53888     shanxi         113.4400       36.2017           95       174     2012      07        27        209              0.209292      30.164490       0.250888       0.255790       0.158000   -9999.000000       0.114400       0.620000
53888     53888     shanxi         113.4400       36.2017           95       174     2012      07        28        210              0.203833      29.695160       0.000000       0.247333       0.159000       0.208200       0.103900       0.672000
53888     53888     shanxi         113.4400       36.2017           95       174     2012      07        29        211              0.196542      31.143005       1.177037       0.236566       0.192000   -9999.000000       0.112700       0.431000
53888     53888     shanxi         113.4400       36.2017           95       174     2012      07        30        212              0.213750      31.618225      13.496030       0.233260   -9999.000000   -9999.000000   -9999.000000   -9999.000000
53888     53888     shanxi         113.4400       36.2017           95       174     2012      07        31        213              0.282042      28.322845      20.589457       0.266082       0.239500       0.065600       0.117500       0.990000
53888     53888     shanxi         113.4400       36.2017           95       174     2012      08        01        214              0.275125      23.712616       7.009367       0.337880       0.197000       0.105200       0.115800       0.809000
53888     53888     shanxi         113.4400       36.2017           95       174     2012      08        02        215              0.284042      24.733154       1.323321       0.318433       0.197000   -9999.000000       0.111200       0.860000
53888     53888     shanxi         113.4400       36.2017           95       174     2012      08        03        216              0.284375      25.188843       0.000000       0.315056       0.227000   -9999.000000       0.106200       0.731000
53888     53888     shanxi         113.4400       36.2017           95       174     2012      08        04        217              0.278917      26.048767       2.100732       0.299858       0.221000   -9999.000000       0.104500   -9999.000000
53888     53888     shanxi         113.4400       36.2017           95       174     2012      08        05        218              0.283583      26.564453       5.261238       0.294391       0.201500       0.193400   -9999.000000       0.793000
53888     53888     shanxi         113.4400       36.2017           95       174     2012      08        06        219              0.284958      24.320953       0.000000       0.311722       0.205500       0.263000       0.110000   -9999.000000
53888     53888     shanxi         113.4400       36.2017           95       174     2012      08        07        220              0.276208      26.321625       0.000000       0.294556       0.174000   -9999.000000   -9999.000000       0.719000
53888     53888     shanxi         113.4400       36.2017           95       174     2012      08        08        221              0.266083      27.949066       5.133282       0.283159   -9999.000000       0.025600       0.127200   -9999.000000
53888     53888     shanxi         113.4400       36.2017           95       174     2012      08        09        222              0.261292      28.304596       5.176170       0.280861       0.201000   -9999.000000       0.137900       1.000000
53888     53888     shanxi         113.4400       36.2017           95       174     2012      08        10        223              0.253583      24.807770       0.000000       0.307482       0.170500       0.224600   -9999.000000       0.651000
53888     53888     shanxi         113.4400       36.2017           95       174     2012      08        11        224              0.245083      26.083740       0.187591       0.284204       0.190500       0.138700       0.148100   -9999.000000
53888     53888     shanxi         113.4400       36.2017           95       174     2012      08        12        225              0.238875      27.888580       1.968797       0.275818       0.212000       0.548100       0.126800       0.808000
53888     53888     shanxi         113.4400       36.2017           95       174     2012      08        13        226              0.238167      24.209656       0.883177       0.283527       0.200000       0.041800       0.147800   -9999.000000
53888     53888     shanxi         113.4400       36.2017           95       174     2012      08        14        227              0.260458      22.507568      17.552534       0.283962       0.212000   -9999.000000       0.152900       1.000000
53888     53888     shanxi         113.4400       36.2017           95       174     2012      08        15        228              0.258792      21.340851       0.000000       0.331238       0.194000       0.345100       0.141300       0.844000
53888     53888     shanxi         113.4400       36.2017           95       174     2012      08        16        229              0.246917      24.785126       0.000000       0.300761       0.179500       0.214500   -9999.000000       0.817000
53888     53888     shanxi         113.4400       36.2017           95       174     2012      08        17        230              0.239208      25.305420       8.803176       0.287944       0.181000       0.294800       0.131100       0.615000
53888     53888     shanxi         113.4400       36.2017           95       174     2012      08        18        231              0.275708      25.116486      27.019787       0.294675   -9999.000000       0.161000       0.155700   -9999.000000
53888     53888     shanxi         113.4400       36.2017           95       174     2012      08        19        232              0.282417      23.134064       0.162327       0.351914   -9999.000000   -9999.000000       0.139200       0.934000
53888     53888     shanxi         113.4400       36.2017           95       174     2012      08        20        233              0.276417      24.831085       0.168907       0.319991       0.189000       0.114100       0.161200       0.768000
53888     53888     shanxi         113.4400       36.2017           95       174     2012      08        21        234              0.272500      25.243103       0.000000       0.309731       0.176000       0.112200       0.154500       0.859000
53888     53888     shanxi         113.4400       36.2017           95       174     2012      08        22        235              0.262292      23.648010       0.000000       0.300220       0.189500   -9999.000000   -9999.000000   -9999.000000
53888     53888     shanxi         113.4400       36.2017           95       174     2012      08        23        236              0.252917      22.104431       0.000000       0.290888       0.170000       0.091200       0.116800   -9999.000000
53888     53888     shanxi         113.4400       36.2017           95       174     2012      08        24        237              0.246083      21.020935       0.000000       0.285136       0.187000   -9999.000000       0.159600       0.691000
53888     53888     shanxi         113.4400       36.2017           95       174     2012      08        25        238              0.000000      22.206512       0.000000       0.278811       0.203000   -9999.000000       0.148700       0.612000
53888     53888     shanxi         113.4400       36.2017           95       174     2012      08        26        239              0.234458      23.102112       0.000000       0.275456       0.206000   -9999.000000       0.153400       0.723000
53888     53888     shanxi         113.4400       36.2017           95       174     2012      08        27        240              0.229167      24.046936       0.000000       0.271082       0.205000   -9999.000000   -9999.000000       0.505000
53888     53888     shanxi         113.4400       36.2017           95       174     2012      08        28        241              0.232167      24.300720       2.106388       0.267059       0.167000       0.094200       0.150400   -9999.000000
53888     53888     shanxi         113.4400       36.2017           95       174     2012      08        29        242              0.237458      24.950867       0.000000       0.271789       0.170000       0.184100       0.138800       0.546000
53888     53888     shanxi         113.4400       36.2017           95       174     2012      08        30        243              0.229292      25.148193       0.000000       0.259643       0.196000   -9999.000000       0.144400       0.583000
53888     53888     shanxi         113.4400       36.2017           95       174     2012      08        31        244              0.224458      25.681000       4.643596       0.252854       0.202000   -9999.000000       0.137500       0.699000
53888     53888     shanxi         113.4400       36.2017           95       174     2012      09        01        245              0.239667      23.951385      10.439903       0.269371       0.161000   -9999.000000       0.158000       1.000000
53888     53888     shanxi         113.4400       36.2017           95       174     2012      09        02        246              0.256333      22.549072       0.194285       0.307866       0.161000   -9999.000000   -9999.000000   -9999.000000
53888     53888     shanxi         113.4400       36.2017           95       174     2012      09        03        247              0.244833      20.851898       0.000000       0.296835       0.144000       0.091600       0.151700       0.533000
53888     53888     shanxi         113.4400       36.2017           95       174     2012      09        04        248              0.236333      21.932922       2.863175       0.279485       0.168000   -9999.000000       0.154500   -9999.000000
53888     53888     shanxi         113.4400       36.2017           95       174     2012      09        05        249              0.250167      21.760529       3.841731       0.275956   -9999.000000   -9999.000000       0.178200       0.833000
53888     53888     shanxi         113.4400       36.2017           95       174     2012      09        06        250              0.246833      21.426605       1.475211       0.299304       0.174000   -9999.000000       0.189100   -9999.000000
53888     53888     shanxi         113.4400       36.2017           95       174     2012      09        07        251              0.241708      20.549774       0.000000       0.289657       0.170000   -9999.000000       0.176500       0.717000
53888     53888     shanxi         113.4400       36.2017           95       174     2012      09        08        252              0.234208      22.376434       0.000000       0.279932       0.143000       0.080000   -9999.000000       0.689000
53888     53888     shanxi         113.4400       36.2017           95       174     2012      09        09        253              0.224875      22.298981       0.000000       0.270020       0.148000   -9999.000000       0.135100   -9999.000000
53888     53888     shanxi         113.4400       36.2017           95       174     2012      09        10        254              0.230125      22.068024      16.829130       0.260939       0.176000       0.025800       0.159600       1.000000
53888     53888     shanxi         113.4400       36.2017           95       174     2012      09        11        255              0.268833      20.303436       0.644749       0.299746       0.166000       0.149600       0.140200   -9999.000000
53888     53888     shanxi         113.4400       36.2017           95       174     2012      09        12        256              0.257000      21.042572       0.000000       0.308270       0.146500   -9999.000000       0.144800       0.770000
53888     53888     shanxi         113.4400       36.2017           95       174     2012      09        13        257              0.247958      16.718597       0.000000       0.291497       0.148000       0.193100   -9999.000000       0.629000
53888     53888     shanxi         113.4400       36.2017           95       174     2012      09        14        258              0.240875      17.402985       0.000000       0.281005       0.140000   -9999.000000       0.132400       0.659000
53888     53888     shanxi         113.4400       36.2017           95       174     2012      09        15        259              0.234458      18.517242       0.000000       0.273412   -9999.000000       0.197500       0.136000       0.570000
53888     53888     shanxi         113.4400       36.2017           95       174     2012      09        16        260              0.229750      18.192657       0.000000       0.267362       0.162000       0.129000       0.142000   -9999.000000
53888     53888     shanxi         113.4400       36.2017           95       174     2012      09        17        261              0.225042      18.457977       0.000000       0.261828       0.139500       0.061500       0.095000       0.466000
53888     53888     shanxi         113.4400       36.2017           95       174     2012      09        18        262              0.220958      19.506470       0.504165       0.257809       0.157500       0.052400       0.100500       0.527000
53888     53888     shanxi         113.4400       36.2017           95       174     2012      09        19        263              0.218042      18.763519       0.569514       0.256056       0.148000   -9999.000000   -9999.000000       0.653000
53888     53888     shanxi         113.4400       36.2017           95       174     2012      09        20        264              0.216125      17.965454       0.000000       0.258529       0.146000       0.134600       0.081800       0.503000
53888     53888     shanxi         113.4400       36.2017           95       174     2012      09        21        265              0.213000      19.520905       0.543533       0.253612   -9999.000000       0.130800       0.110700   -9999.000000
53888     53888     shanxi         113.4400       36.2017           95       174     2012      09        22        266              0.214583      17.360107       0.000000       0.260428       0.155000       0.194200       0.097600       0.670000
53888     53888     shanxi         113.4400       36.2017           95       174     2012      09        23        267              0.211167      20.392883       0.000000       0.253792       0.146000   -9999.000000       0.099400       0.638000
53888     53888     shanxi         113.4400       36.2017           95       174     2012      09        24        268              0.206792      20.899017       0.000000       0.249142       0.149000   -9999.000000   -9999.000000       0.642000
53888     53888     shanxi         113.4400       36.2017           95       174     2012      09        25        269              0.213208      19.748352       4.568777       0.245324       0.165000   -9999.000000       0.165300       0.832000
53888     53888     shanxi         113.4400       36.2017           95       174     2012      09        26        270              0.229833      19.400513       0.125814       0.268477       0.176000       0.096700       0.123900   -9999.000000
53888     53888     shanxi         113.4400       36.2017           95       174     2012      09        27        271              0.229929      17.494507       0.000000       0.271373       0.161000   -9999.000000       0.141900       0.653000
53888     53888     shanxi         113.4400       36.2017           95       174     2012      09        28        272              0.217200      18.238495       0.000000       0.257335       0.142500   -9999.000000       0.134900       0.439000
53888     53888     shanxi         113.4400       36.2017           95       174     2012      09        29        273              0.214042      15.707764       0.000000       0.247479       0.155000   -9999.000000       0.147600       0.472000
53888     53888     shanxi         113.4400       36.2017           95       174     2012      09        30        274              0.209792      15.682068       0.000000       0.241719       0.144000   -9999.000000   -9999.000000       0.389000
53888     53888     shanxi         113.4400       36.2017           95       174     2012      10        01        275              0.206083      16.235596       0.167193       0.236844       0.123000   -9999.000000       0.093800   -9999.000000
53888     53888     shanxi         113.4400       36.2017           95       174     2012      10        02        276              0.202917      17.230774       0.000000       0.232684       0.121000   -9999.000000       0.099000       0.486000
53888     53888     shanxi         113.4400       36.2017           95       174     2012      10        03        277              0.200542      19.344940       0.000000       0.228848       0.114000       0.068300       0.109000   -9999.000000
53888     53888     shanxi         113.4400       36.2017           95       174     2012      10        04        278              0.197667      20.139282       6.649998       0.223148       0.131000       0.035700       0.100000       0.855000
53888     53888     shanxi         113.4400       36.2017           95       174     2012      10        05        279              0.202542      18.662048       0.000000       0.252782       0.136000   -9999.000000       0.108800   -9999.000000
53888     53888     shanxi         113.4400       36.2017           95       174     2012      10        06        280              0.200708      16.725922       0.000000       0.260790       0.132000   -9999.000000   -9999.000000       0.572000
53888     53888     shanxi         113.4400       36.2017           95       174     2012      10        07        281              0.198000      16.973083       0.000000       0.247805       0.127000   -9999.000000       0.076000       0.600000
53888     53888     shanxi         113.4400       36.2017           95       174     2012      10        08        282              0.196833      16.548340       0.443712       0.243285       0.128000       0.116800       0.111100   -9999.000000
53888     53888     shanxi         113.4400       36.2017           95       174     2012      10        09        283              0.193833      18.190308       0.000000       0.238780       0.118500       0.053900       0.103400       0.554000
53888     53888     shanxi         113.4400       36.2017           95       174     2012      10        10        284              0.190042      16.381042       0.000000       0.230456       0.127500   -9999.000000       0.112900   -9999.000000
53888     53888     shanxi         113.4400       36.2017           95       174     2012      10        11        285              0.188875      15.206360       0.000000       0.224758       0.108000   -9999.000000   -9999.000000       0.360000
53888     53888     shanxi         113.4400       36.2017           95       174     2012      10        12        286              0.187542      16.996185       0.000000       0.221841   -9999.000000   -9999.000000       0.116400       0.522000
53888     53888     shanxi         113.4400       36.2017           95       174     2012      10        13        287              0.185375      17.734833       0.000000       0.220641       0.106000       0.138800       0.094400       0.551000
53888     53888     shanxi         113.4400       36.2017           95       174     2012      10        14        288              0.183667      16.956940       0.050693       0.216242       0.096000       0.004200       0.114400       0.542000
53888     53888     shanxi         113.4400       36.2017           95       174     2012      10        15        289              0.182292      15.664948       0.508191       0.213266       0.118500   -9999.000000       0.102000   -9999.000000
53888     53888     shanxi         113.4400       36.2017           95       174     2012      10        16        290              0.181500      14.890228       0.393306       0.218427       0.111000   -9999.000000       0.106800       0.563000
53888     53888     shanxi         113.4400       36.2017           95       174     2012      10        17        291              0.179833      12.696869       0.000000       0.220437       0.103000       0.293900   -9999.000000       0.531000
53888     53888     shanxi         113.4400       36.2017           95       174     2012      10        18        292              0.182458      11.708649       0.000000       0.214148       0.103000       0.072500       0.090300       0.653000
53888     53888     shanxi         113.4400       36.2017           95       174     2012      10        19        293              0.182458      14.666138       0.000000       0.211510       0.112000   -9999.000000       0.107500       0.341000
53888     53888     shanxi         113.4400       36.2017           95       174     2012      10        20        294              0.182167      15.052734       0.000000       0.210893       0.104500   -9999.000000       0.098000   -9999.000000
53888     53888     shanxi         113.4400       36.2017           95       174     2012      10        21        295              0.186000      16.327820       4.495349       0.208360       0.124000   -9999.000000       0.096600       0.686000
53888     53888     shanxi         113.4400       36.2017           95       174     2012      10        22        296              0.195500      11.503876       0.000000       0.243232   -9999.000000   -9999.000000       0.106600       0.446000
53888     53888     shanxi         113.4400       36.2017           95       174     2012      10        23        297              0.196208      10.649689       0.000000       0.243278   -9999.000000   -9999.000000   -9999.000000       0.525000
53888     53888     shanxi         113.4400       36.2017           95       174     2012      10        24        298              0.196208      10.638641       0.000000       0.237163   -9999.000000   -9999.000000       0.059400       0.321000
53888     53888     shanxi         113.4400       36.2017           95       174     2012      10        25        299              0.000000      12.630219       0.000000       0.230739       0.100500   -9999.000000       0.092600   -9999.000000
53888     53888     shanxi         113.4400       36.2017           95       174     2012      10        26        300              0.191958      12.839935       0.064158       0.225981       0.114000   -9999.000000       0.087000       0.320000
53888     53888     shanxi         113.4400       36.2017           95       174     2012      10        27        301              0.192375      10.429840       0.000000       0.228057       0.109000       0.062100       0.097700       0.494000
53888     53888     shanxi         113.4400       36.2017           95       174     2012      10        28        302              0.000000      13.181122       0.000000       0.224212       0.114000       0.234700   -9999.000000       0.432000
53888     53888     shanxi         113.4400       36.2017           95       174     2012      10        29        303              0.189875      12.486572       0.000000       0.220850       0.115000       0.022100       0.081800       0.312000
53888     53888     shanxi         113.4400       36.2017           95       174     2012      10        30        304              0.185333      12.856293       0.000000       0.220493       0.103500   -9999.000000       0.070400   -9999.000000
53888     53888     shanxi         113.4400       36.2017           95       174     2012      10        31        305              0.183000       9.928101       0.000000       0.216573       0.113000       0.344600       0.087400       0.307000
53888     53888     shanxi         113.4400       36.2017           95       174     2012      11        01        306              0.182583       9.746613       0.000000       0.212960       0.105000       0.101900       0.074100   -9999.000000
53888     53888     shanxi         113.4400       36.2017           95       174     2012      11        02        307              0.181583      10.267029       2.593758       0.211984       0.106000   -9999.000000       0.084600       0.407000
53888     53888     shanxi         113.4400       36.2017           95       174     2012      11        03        308              0.185958      11.267609       0.682099       0.215360   -9999.000000       0.235200   -9999.000000   -9999.000000
53888     53888     shanxi         113.4400       36.2017           95       174     2012      11        04        309              0.189667       4.861420       0.000000       0.241678   -9999.000000       0.034600       0.066900       0.453000
53888     53888     shanxi         113.4400       36.2017           95       174     2012      11        05        310              0.190083       3.756744       0.000000       0.229083       0.107000   -9999.000000       0.081700       0.407000
53888     53888     shanxi         113.4400       36.2017           95       174     2012      11        06        311              0.191000       5.956512       0.000000       0.227939       0.112000       0.072100       0.078600   -9999.000000
53888     53888     shanxi         113.4400       36.2017           95       174     2012      11        07        312              0.190565       8.021942       0.000000       0.227364       0.110000   -9999.000000       0.085400       0.436000
53888     53888     shanxi         113.4400       36.2017           95       174     2012      11        08        313              0.189000       7.317932       0.000000       0.227045   -9999.000000   -9999.000000   -9999.000000   -9999.000000
53888     53888     shanxi         113.4400       36.2017           95       174     2012      11        09        314              0.187750       7.507111       0.127362       0.224956       0.124000       0.177200   -9999.000000       0.235000
53888     53888     shanxi         113.4400       36.2017           95       174     2012      11        10        315              0.197750       6.318573       0.426813       0.226425   -9999.000000   -9999.000000       0.048700       0.444000
53888     53888     shanxi         113.4400       36.2017           95       174     2012      11        11        316              0.201500       3.697876       0.000000       0.225740       0.125000   -9999.000000       0.085300       0.380000
53888     53888     shanxi         113.4400       36.2017           95       174     2012      11        12        317              0.200542       3.945374       0.000000       0.218095       0.108000   -9999.000000       0.075300       0.342000
53888     53888     shanxi         113.4400       36.2017           95       174     2012      11        13        318              0.000000       5.283722       0.000000       0.222090       0.106000   -9999.000000       0.078800   -9999.000000
53888     53888     shanxi         113.4400       36.2017           95       174     2012      11        14        319              0.199125       4.975372       0.000000       0.213402   -9999.000000       0.086100   -9999.000000       0.268000
53888     53888     shanxi         113.4400       36.2017           95       174     2012      11        15        320              0.198000       4.795715       0.494786       0.211544   -9999.000000   -9999.000000       0.070000       0.550000
53888     53888     shanxi         113.4400       36.2017           95       174     2012      11        16        321              0.199292       3.661896       0.000000       0.223855       0.101000       0.035400       0.076500       0.531000
53888     53888     shanxi         113.4400       36.2017           95       174     2012      11        17        322              0.000000       3.796448       0.000000       0.217396       0.106000   -9999.000000       0.083400       0.314000
53888     53888     shanxi         113.4400       36.2017           95       174     2012      11        18        323              0.197917       5.396606       0.000000       0.219117       0.099000       0.266300       0.074700   -9999.000000
53888     53888     shanxi         113.4400       36.2017           95       174     2012      11        19        324              0.196417       6.421387       0.000000       0.221068       0.108000       0.070000       0.073500       0.151000
53888     53888     shanxi         113.4400       36.2017           95       174     2012      11        20        325              0.196417       5.735291       0.000000       0.222048       0.108000   -9999.000000   -9999.000000       0.351000
53888     53888     shanxi         113.4400       36.2017           95       174     2012      11        21        326              0.195208       5.271179       0.000000       0.224576       0.089500       0.066200       0.051000       0.543000
53888     53888     shanxi         113.4400       36.2017           95       174     2012      11        22        327              0.193958       6.329834       0.000000       0.224159       0.099000   -9999.000000       0.073600       0.213000
53888     53888     shanxi         113.4400       36.2017           95       174     2012      11        23        328              0.191375       4.519623       0.000000       0.217753       0.082000       0.220500       0.063700   -9999.000000
53888     53888     shanxi         113.4400       36.2017           95       174     2012      11        24        329              0.189208       2.375610       0.000000       0.199476       0.094000       0.041500       0.068700       0.172000
53888     53888     shanxi         113.4400       36.2017           95       174     2012      11        25        330              0.189792       3.752319       0.591103       0.215962   -9999.000000   -9999.000000   -9999.000000   -9999.000000
53888     53888     shanxi         113.4400       36.2017           95       174     2012      11        26        331              0.185958       3.038330       0.000000       0.213697       0.083000       0.196200   -9999.000000       0.253000
53888     53888     shanxi         113.4400       36.2017           95       174     2012      11        27        332              0.185667       2.525604       0.000000       0.204382       0.093000       0.077600       0.045500       0.261000
53888     53888     shanxi         113.4400       36.2017           95       174     2012      11        28        333              0.185042       4.652191       0.000000       0.213985       0.086000   -9999.000000       0.069200   -9999.000000
53888     53888     shanxi         113.4400       36.2017           95       174     2012      11        29        334              0.180042       1.947662       0.000000       0.195804       0.090000   -9999.000000       0.058900       0.183000
53888     53888     shanxi         113.4400       36.2017           95       174     2012      11        30        335              0.174917       1.306915       0.000000       0.189274   -9999.000000   -9999.000000       0.060400   -9999.000000
53888     53888     shanxi         113.4400       36.2017           95       174     2012      12        01        336              0.168375       0.114624       0.000000       0.181491   -9999.000000   -9999.000000   -9999.000000       0.230000
53888     53888     shanxi         113.4400       36.2017           95       174     2012      12        02        337              0.172917      -1.302185       0.000000       0.167166   -9999.000000       0.067600       0.055200   -9999.000000
53888     53888     shanxi         113.4400       36.2017           95       174     2012      12        03        338              0.166208       0.931641       0.000000       0.192581   -9999.000000       0.212600       0.067200       0.094000
53888     53888     shanxi         113.4400       36.2017           95       174     2012      12        04        339              0.166375       0.182953       0.000000       0.183327       0.086000       0.056400       0.055300       0.183000
53888     53888     shanxi         113.4400       36.2017           95       174     2012      12        05        340              0.158583       2.112640       0.000000       0.197802   -9999.000000   -9999.000000       0.059600   -9999.000000
53888     53888     shanxi         113.4400       36.2017           95       174     2012      12        06        341              0.153125      -0.539612       0.000000       0.177941   -9999.000000       0.269200       0.063100       0.246000
53888     53888     shanxi         113.4400       36.2017           95       174     2012      12        07        342              0.151375       1.324554       0.000000       0.189744   -9999.000000       0.065000   -9999.000000   -9999.000000
53888     53888     shanxi         113.4400       36.2017           95       174     2012      12        08        343              0.141458       0.730408       0.000000       0.187049   -9999.000000   -9999.000000       0.017500       0.032000
53888     53888     shanxi         113.4400       36.2017           95       174     2012      12        09        344              0.137667      -1.368561       0.000000       0.170816   -9999.000000       0.118200       0.066500       0.152000
53888     53888     shanxi         113.4400       36.2017           95       174     2012      12        10        345              0.137750      -1.003387       0.000000       0.171645   -9999.000000   -9999.000000       0.050800       0.169000
53888     53888     shanxi         113.4400       36.2017           95       174     2012      12        11        346              0.133875      -1.520935       0.000000       0.168543   -9999.000000       0.232100       0.056500       0.141000
53888     53888     shanxi         113.4400       36.2017           95       174     2012      12        12        347              0.134208      -3.363739       0.000000       0.157691   -9999.000000   -9999.000000   -9999.000000   -9999.000000
53888     53888     shanxi         113.4400       36.2017           95       174     2012      12        13        348              0.136917      -1.650146       0.133715       0.165673   -9999.000000   -9999.000000       0.048800       0.026000
53888     53888     shanxi         113.4400       36.2017           95       174     2012      12        14        349              0.140417      -2.257538       1.721564       0.159239   -9999.000000   -9999.000000       0.042100       0.280000
53888     53888     shanxi         113.4400       36.2017           95       174     2012      12        15        350              0.000000      -0.994141       0.546420       0.178271   -9999.000000       0.125900       0.054300       0.053000
53888     53888     shanxi         113.4400       36.2017           95       174     2012      12        16        351              0.144333      -1.534210       0.121084       0.165592   -9999.000000       0.208600   -9999.000000       0.146000
53888     53888     shanxi         113.4400       36.2017           95       174     2012      12        17        352              0.142333      -0.379700       0.000000       0.184216   -9999.000000       0.140700       0.052600   -9999.000000
53888     53888     shanxi         113.4400       36.2017           95       174     2012      12        18        353              0.137542      -1.790436       0.103053       0.168181   -9999.000000   -9999.000000   -9999.000000       0.011000
53888     53888     shanxi         113.4400       36.2017           95       174     2012      12        19        354              0.137750      -2.231720       4.064946       0.165058   -9999.000000   -9999.000000       0.036100       0.209000
53888     53888     shanxi         113.4400       36.2017           95       174     2012      12        20        355              0.000000      -1.692566       0.000000       0.167441   -9999.000000       0.068800       0.045000       0.127000
53888     53888     shanxi         113.4400       36.2017           95       174     2012      12        21        356              0.138792      -3.384094       0.113810       0.150798   -9999.000000       0.298800       0.039400       0.051000
53888     53888     shanxi         113.4400       36.2017           95       174     2012      12        22        357              0.135417      -2.421265       0.000000       0.165883   -9999.000000       0.038600       0.044800   -9999.000000
53888     53888     shanxi         113.4400       36.2017           95       174     2012      12        23        358              0.131000      -5.055298       0.000000       0.150235   -9999.000000   -9999.000000   -9999.000000       0.054000
53888     53888     shanxi         113.4400       36.2017           95       174     2012      12        24        359              0.131150      -8.413605       0.000000       0.130612   -9999.000000       0.156300   -9999.000000       0.011000
53888     53888     shanxi         113.4400       36.2017           95       174     2012      12        25        360              0.131208      -5.038910       0.000000       0.144505   -9999.000000       0.033600       0.022100       0.010000
53888     53888     shanxi         113.4400       36.2017           95       174     2012      12        26        361              0.000000      -5.662323       0.000000       0.144077   -9999.000000   -9999.000000       0.050000       0.052000
53888     53888     shanxi         113.4400       36.2017           95       174     2012      12        27        362              0.131818      -5.011536       0.000000       0.144044   -9999.000000   -9999.000000       0.044700   -9999.000000
53888     53888     shanxi         113.4400       36.2017           95       174     2012      12        28        363              0.000000      -2.499390       0.000000       0.159586   -9999.000000       0.015900       0.044900       0.040000
53888     53888     shanxi         113.4400       36.2017           95       174     2012      12        29        364              0.000000      -2.087006       0.000000       0.165491   -9999.000000       0.157700   -9999.000000   -9999.000000
53888     53888     shanxi         113.4400       36.2017           95       174     2012      12        30        365              0.000000      -6.784241       0.000000       0.137073   -9999.000000   -9999.000000       0.043000       0.215000
53888     53888     shanxi         113.4400       36.2017           95       174     2012      12        31        366              0.129200      -5.197723       0.000000       0.142592   -9999.000000   -9999.000000       0.035900   -9999.000000
