# Supplementary material for: Research on Fusing Multisatellite Soil Moisture Data Based on Bayesian Model Averaging
Source: Hindawi journal article supplement (doi:10.1155/2018/9310838), 2018-06-25
Supplement: f1 [file 9310838.f1.zip › 2012_sm00-10cm_daily_ZDB_ZHY_53915_366days_allin.txt]

53915     53915     gansu          106.6900       35.5600           98       147     2012      01        01        001              0.000000   -9999.000000       0.000000   -9999.000000       0.077000   -9999.000000       0.046200   -9999.000000
53915     53915     gansu          106.6900       35.5600           98       147     2012      01        02        002              0.037708      -3.097137       0.000000       0.153217   -9999.000000   -9999.000000   -9999.000000       0.064000
53915     53915     gansu          106.6900       35.5600           98       147     2012      01        03        003              0.000000      -4.269958       0.000000       0.143435   -9999.000000   -9999.000000       0.047300   -9999.000000
53915     53915     gansu          106.6900       35.5600           98       147     2012      01        04        004              0.027542      -6.278656      25.036423       0.132834   -9999.000000   -9999.000000       0.054400       0.074000
53915     53915     gansu          106.6900       35.5600           98       147     2012      01        05        005              0.026458      -6.192963       0.000000       0.130641       0.074000   -9999.000000       0.044000   -9999.000000
53915     53915     gansu          106.6900       35.5600           98       147     2012      01        06        006              0.027045      -5.059357       0.000000       0.137982   -9999.000000   -9999.000000       0.051600       0.101000
53915     53915     gansu          106.6900       35.5600           98       147     2012      01        07        007              0.030318      -4.183563       0.000000       0.136944   -9999.000000   -9999.000000   -9999.000000   -9999.000000
53915     53915     gansu          106.6900       35.5600           98       147     2012      01        08        008              0.000000      -3.539459       0.000000       0.149414   -9999.000000   -9999.000000       0.054600   -9999.000000
53915     53915     gansu          106.6900       35.5600           98       147     2012      01        09        009              0.029583      -3.581482       0.000000       0.146637   -9999.000000   -9999.000000   -9999.000000       0.098000
53915     53915     gansu          106.6900       35.5600           98       147     2012      01        10        010              0.029208      -2.524292       0.000000       0.165156       0.074000   -9999.000000       0.046000   -9999.000000
53915     53915     gansu          106.6900       35.5600           98       147     2012      01        11        011              0.027913      -3.324280       0.000000       0.156907       0.074000   -9999.000000       0.040300       0.072000
53915     53915     gansu          106.6900       35.5600           98       147     2012      01        12        012              0.028333      -3.599304       0.000000       0.149004       0.078000   -9999.000000       0.043100   -9999.000000
53915     53915     gansu          106.6900       35.5600           98       147     2012      01        13        013              0.028292      -2.640564       0.122941       0.161181   -9999.000000   -9999.000000   -9999.000000       0.036000
53915     53915     gansu          106.6900       35.5600           98       147     2012      01        14        014              0.028333      -2.941895       0.000000       0.155502   -9999.000000       0.127100       0.045200       0.153000
53915     53915     gansu          106.6900       35.5600           98       147     2012      01        15        015              0.026043      -2.581512       0.000000       0.164368       0.083000   -9999.000000       0.049400       0.012000
53915     53915     gansu          106.6900       35.5600           98       147     2012      01        16        016              0.030083      -3.322815       0.000000       0.151021       0.074000   -9999.000000       0.035300       0.139000
53915     53915     gansu          106.6900       35.5600           98       147     2012      01        17        017              0.000000      -0.781403       0.000000       0.183449       0.071000   -9999.000000       0.041700   -9999.000000
53915     53915     gansu          106.6900       35.5600           98       147     2012      01        18        018              0.031292      -0.603912       0.000000       0.190475       0.076000   -9999.000000       0.040800       0.060000
53915     53915     gansu          106.6900       35.5600           98       147     2012      01        19        019              0.031000      -1.234039       0.000000       0.178984   -9999.000000   -9999.000000   -9999.000000       0.162000
53915     53915     gansu          106.6900       35.5600           98       147     2012      01        20        020              0.046917      -3.176453       0.000000       0.148265   -9999.000000   -9999.000000       0.040600       0.035000
53915     53915     gansu          106.6900       35.5600           98       147     2012      01        21        021              0.031600      -5.287415       0.000000       0.134688   -9999.000000   -9999.000000       0.041200       0.101000
53915     53915     gansu          106.6900       35.5600           98       147     2012      01        22        022              0.037333      -8.724792       1.362284       0.123731   -9999.000000   -9999.000000       0.033900   -9999.000000
53915     53915     gansu          106.6900       35.5600           98       147     2012      01        23        023              0.027652     -10.927612       0.000000       0.119189   -9999.000000   -9999.000000       0.032300       0.052000
53915     53915     gansu          106.6900       35.5600           98       147     2012      01        24        024              0.024250     -10.620789       0.272585       0.118082   -9999.000000   -9999.000000   -9999.000000       0.109000
53915     53915     gansu          106.6900       35.5600           98       147     2012      01        25        025              0.023913      -9.279694       0.206358       0.118535   -9999.000000   -9999.000000       0.033800       0.032000
53915     53915     gansu          106.6900       35.5600           98       147     2012      01        26        026              0.024958      -6.529724       0.000000       0.123214   -9999.000000   -9999.000000       0.021200       0.201000
53915     53915     gansu          106.6900       35.5600           98       147     2012      01        27        027              0.025708      -4.039124       0.000000       0.144717   -9999.000000   -9999.000000       0.033800   -9999.000000
53915     53915     gansu          106.6900       35.5600           98       147     2012      01        28        028              0.027958      -3.156189       0.000000       0.152607   -9999.000000   -9999.000000       0.031700       0.221000
53915     53915     gansu          106.6900       35.5600           98       147     2012      01        29        029              0.029958      -2.941772       0.000000       0.153785   -9999.000000   -9999.000000       0.034300   -9999.000000
53915     53915     gansu          106.6900       35.5600           98       147     2012      01        30        030              0.032500      -1.935181       0.000000       0.167287   -9999.000000   -9999.000000   -9999.000000       0.157000
53915     53915     gansu          106.6900       35.5600           98       147     2012      01        31        031              0.032708      -0.390930       0.000000       0.191371       0.090000   -9999.000000       0.037900       0.292000
53915     53915     gansu          106.6900       35.5600           98       147     2012      02        01        032              0.032917       0.675568       0.000000       0.206134       0.085000   -9999.000000       0.038200   -9999.000000
53915     53915     gansu          106.6900       35.5600           98       147     2012      02        02        033              0.030167      -0.963837       0.000000       0.186326   -9999.000000   -9999.000000       0.035400       0.171000
53915     53915     gansu          106.6900       35.5600           98       147     2012      02        03        034              0.029458      -2.612366       0.000000       0.162765       0.092000   -9999.000000       0.046200   -9999.000000
53915     53915     gansu          106.6900       35.5600           98       147     2012      02        04        035              0.032250      -0.403229       0.000000       0.189514   -9999.000000   -9999.000000       0.050200       0.079000
53915     53915     gansu          106.6900       35.5600           98       147     2012      02        05        036              0.035375       0.452759       0.000000       0.198881   -9999.000000   -9999.000000   -9999.000000   -9999.000000
53915     53915     gansu          106.6900       35.5600           98       147     2012      02        06        037              0.034261       0.926392       0.000000       0.209736   -9999.000000   -9999.000000       0.039100   -9999.000000
53915     53915     gansu          106.6900       35.5600           98       147     2012      02        07        038              0.026917      -3.384827       0.000000       0.161045   -9999.000000   -9999.000000       0.043700       0.163000
53915     53915     gansu          106.6900       35.5600           98       147     2012      02        08        039              0.025417      -4.612152       0.000000       0.143602   -9999.000000   -9999.000000       0.037600   -9999.000000
53915     53915     gansu          106.6900       35.5600           98       147     2012      02        09        040              0.024091      -5.010315       0.000000       0.136291   -9999.000000   -9999.000000       0.037700       0.098000
53915     53915     gansu          106.6900       35.5600           98       147     2012      02        10        041              0.023958      -7.041046       0.368336       0.126248   -9999.000000   -9999.000000   -9999.000000   -9999.000000
53915     53915     gansu          106.6900       35.5600           98       147     2012      02        11        042              0.025292      -4.564972       0.000000       0.144197       0.089000   -9999.000000       0.043100       0.141000
53915     53915     gansu          106.6900       35.5600           98       147     2012      02        12        043              0.029625      -2.599884       0.541304       0.156293   -9999.000000   -9999.000000   -9999.000000       0.239000
53915     53915     gansu          106.6900       35.5600           98       147     2012      02        13        044              0.029958      -1.622253       0.000000       0.171504   -9999.000000   -9999.000000       0.032100       0.132000
53915     53915     gansu          106.6900       35.5600           98       147     2012      02        14        045              0.034583      -1.055603       0.000000       0.177802   -9999.000000   -9999.000000   -9999.000000       0.233000
53915     53915     gansu          106.6900       35.5600           98       147     2012      02        15        046              0.039958       0.804688       0.000000       0.203709   -9999.000000   -9999.000000       0.041300   -9999.000000
53915     53915     gansu          106.6900       35.5600           98       147     2012      02        16        047              0.036913      -1.148102       0.000000       0.185236       0.086000   -9999.000000   -9999.000000       0.152000
53915     53915     gansu          106.6900       35.5600           98       147     2012      02        17        048              0.034083      -1.355927       0.000000       0.178624   -9999.000000   -9999.000000       0.039500       0.277000
53915     53915     gansu          106.6900       35.5600           98       147     2012      02        18        049              0.031083      -2.859467       0.000000       0.159637   -9999.000000   -9999.000000       0.041000       0.143000
53915     53915     gansu          106.6900       35.5600           98       147     2012      02        19        050              0.032125      -2.045258       0.000000       0.171646       0.089000   -9999.000000       0.039600       0.165000
53915     53915     gansu          106.6900       35.5600           98       147     2012      02        20        051              0.034042       0.140411       0.000000       0.192861   -9999.000000   -9999.000000       0.051500   -9999.000000
53915     53915     gansu          106.6900       35.5600           98       147     2012      02        21        052              0.039792       0.717438       0.000000       0.201534       0.078000   -9999.000000   -9999.000000       0.087000
53915     53915     gansu          106.6900       35.5600           98       147     2012      02        22        053              0.049667       2.816254       0.000000       0.222800   -9999.000000   -9999.000000   -9999.000000       0.401000
53915     53915     gansu          106.6900       35.5600           98       147     2012      02        23        054              0.050000       1.699097       0.000000       0.225782   -9999.000000   -9999.000000       0.041400       0.218000
53915     53915     gansu          106.6900       35.5600           98       147     2012      02        24        055              0.047739       0.072174       0.000000       0.201179   -9999.000000   -9999.000000       0.046200       0.224000
53915     53915     gansu          106.6900       35.5600           98       147     2012      02        25        056              0.041750      -0.715820       0.000000       0.186120   -9999.000000   -9999.000000       0.041500   -9999.000000
53915     53915     gansu          106.6900       35.5600           98       147     2012      02        26        057              0.039708      -2.540192       0.535907       0.154635   -9999.000000   -9999.000000       0.050000       0.273000
53915     53915     gansu          106.6900       35.5600           98       147     2012      02        27        058              0.047375       0.740845       0.000000       0.200978       0.075000   -9999.000000   -9999.000000       0.231000
53915     53915     gansu          106.6900       35.5600           98       147     2012      02        28        059              0.048391       0.430298       0.000000       0.196055       0.068000   -9999.000000   -9999.000000       0.225000
53915     53915     gansu          106.6900       35.5600           98       147     2012      02        29        060              0.000000   -9999.000000       0.000000   -9999.000000       0.079000   -9999.000000   -9999.000000   -9999.000000
53915     53915     gansu          106.6900       35.5600           98       147     2012      03        01        061              0.069625      -0.223846       0.485740       0.189149   -9999.000000   -9999.000000       0.052700   -9999.000000
53915     53915     gansu          106.6900       35.5600           98       147     2012      03        02        062              0.070045       1.145630       2.029478       0.216436       0.077000   -9999.000000       0.047800       0.362000
53915     53915     gansu          106.6900       35.5600           98       147     2012      03        03        063              0.073083      -0.144897       0.000000       0.193245   -9999.000000   -9999.000000       0.048900   -9999.000000
53915     53915     gansu          106.6900       35.5600           98       147     2012      03        04        064              0.071375      -0.105194       0.798359       0.193649   -9999.000000   -9999.000000   -9999.000000       0.350000
53915     53915     gansu          106.6900       35.5600           98       147     2012      03        05        065              0.079391      -0.674011       0.643929       0.177954   -9999.000000   -9999.000000       0.043900   -9999.000000
53915     53915     gansu          106.6900       35.5600           98       147     2012      03        06        066              0.081652       0.412201       0.000000       0.199290   -9999.000000   -9999.000000       0.046700   -9999.000000
53915     53915     gansu          106.6900       35.5600           98       147     2012      03        07        067              0.000000       0.955383       0.000000       0.205734   -9999.000000   -9999.000000       0.047700       0.444000
53915     53915     gansu          106.6900       35.5600           98       147     2012      03        08        068              0.092783       0.890381       0.936615       0.210170   -9999.000000   -9999.000000       0.045500   -9999.000000
53915     53915     gansu          106.6900       35.5600           98       147     2012      03        09        069              0.130045       0.592041       0.903201       0.208242       0.097000   -9999.000000   -9999.000000       0.374000
53915     53915     gansu          106.6900       35.5600           98       147     2012      03        10        070              0.150500       2.617798       0.000000       0.226713       0.099000   -9999.000000   -9999.000000   -9999.000000
53915     53915     gansu          106.6900       35.5600           98       147     2012      03        11        071              0.155833       4.351715       0.000000       0.244293       0.093000   -9999.000000       0.044600       0.653000
53915     53915     gansu          106.6900       35.5600           98       147     2012      03        12        072              0.153261       4.337799       0.000000       0.246116   -9999.000000   -9999.000000       0.048900       0.516000
53915     53915     gansu          106.6900       35.5600           98       147     2012      03        13        073              0.148750       4.112122       0.000000       0.249376       0.089000   -9999.000000       0.065000       0.530000
53915     53915     gansu          106.6900       35.5600           98       147     2012      03        14        074              0.145208       7.615204       0.000000       0.259739       0.099000   -9999.000000   -9999.000000       0.624000
53915     53915     gansu          106.6900       35.5600           98       147     2012      03        15        075              0.142217       6.326050       2.381730       0.262492       0.094000   -9999.000000   -9999.000000   -9999.000000
53915     53915     gansu          106.6900       35.5600           98       147     2012      03        16        076              0.137864       5.455353       0.000000       0.260111       0.085000   -9999.000000       0.048700       0.519000
53915     53915     gansu          106.6900       35.5600           98       147     2012      03        17        077              0.133333       7.879517       0.000000       0.256939   -9999.000000   -9999.000000       0.039400       0.682000
53915     53915     gansu          106.6900       35.5600           98       147     2012      03        18        078              0.128636       9.917664       1.474466       0.255327   -9999.000000   -9999.000000       0.054600       0.453000
53915     53915     gansu          106.6900       35.5600           98       147     2012      03        19        079              0.127125       9.242340       0.000000       0.253597       0.086000   -9999.000000       0.064400       0.494000
53915     53915     gansu          106.6900       35.5600           98       147     2012      03        20        080              0.122833       8.957855       0.144939       0.253608       0.082500   -9999.000000       0.067700   -9999.000000
53915     53915     gansu          106.6900       35.5600           98       147     2012      03        21        081              0.120091       7.244751       0.000000       0.253394       0.107000   -9999.000000   -9999.000000       0.567000
53915     53915     gansu          106.6900       35.5600           98       147     2012      03        22        082              0.116417       3.629395       0.000000       0.250955   -9999.000000       0.204300       0.049500       0.533000
53915     53915     gansu          106.6900       35.5600           98       147     2012      03        23        083              0.111583       2.568634       0.022754       0.236029   -9999.000000   -9999.000000       0.053200       0.313000
53915     53915     gansu          106.6900       35.5600           98       147     2012      03        24        084              0.107125       5.314850       0.000000       0.233421       0.083000       0.056400       0.053600       0.490000
53915     53915     gansu          106.6900       35.5600           98       147     2012      03        25        085              0.000000       8.640961       0.000000       0.242565       0.075000   -9999.000000       0.057600   -9999.000000
53915     53915     gansu          106.6900       35.5600           98       147     2012      03        26        086              0.098792       9.971863       0.516578       0.241588       0.083000   -9999.000000   -9999.000000       0.316000
53915     53915     gansu          106.6900       35.5600           98       147     2012      03        27        087              0.094292      11.154205       0.707857       0.239129   -9999.000000   -9999.000000       0.068500       0.300000
53915     53915     gansu          106.6900       35.5600           98       147     2012      03        28        088              0.117667      12.550720       2.196021       0.236645   -9999.000000   -9999.000000       0.068700       0.723000
53915     53915     gansu          106.6900       35.5600           98       147     2012      03        29        089              0.123625       7.206482       0.078333       0.249391       0.094500   -9999.000000       0.083200       0.656000
53915     53915     gansu          106.6900       35.5600           98       147     2012      03        30        090              0.112667      10.988312       0.486562       0.243919       0.083000   -9999.000000       0.060600   -9999.000000
53915     53915     gansu          106.6900       35.5600           98       147     2012      03        31        091              0.104792       7.291290       0.000000       0.239337       0.077000   -9999.000000       0.062000       0.578000
53915     53915     gansu          106.6900       35.5600           98       147     2012      04        01        092              0.098583      12.233307       0.044619       0.236332       0.083000       0.052800   -9999.000000   -9999.000000
53915     53915     gansu          106.6900       35.5600           98       147     2012      04        02        093              0.091083      12.145172       0.122455       0.234536   -9999.000000   -9999.000000       0.058800       0.303000
53915     53915     gansu          106.6900       35.5600           98       147     2012      04        03        094              0.085500       8.653015       0.000000       0.233521       0.080000   -9999.000000       0.049400   -9999.000000
53915     53915     gansu          106.6900       35.5600           98       147     2012      04        04        095              0.079167      12.013641       0.000000       0.229211       0.068500   -9999.000000       0.060600   -9999.000000
53915     53915     gansu          106.6900       35.5600           98       147     2012      04        05        096              0.073167      14.055145       0.000000       0.222865       0.060000   -9999.000000       0.057600       0.414000
53915     53915     gansu          106.6900       35.5600           98       147     2012      04        06        097              0.113083      11.911713       0.000000       0.221828       0.081000   -9999.000000       0.055900   -9999.000000
53915     53915     gansu          106.6900       35.5600           98       147     2012      04        07        098              0.135625      12.082886       1.536163       0.220475       0.068000   -9999.000000   -9999.000000       0.208000
53915     53915     gansu          106.6900       35.5600           98       147     2012      04        08        099              0.132417      14.252686       0.481989       0.216204       0.071000   -9999.000000       0.055800   -9999.000000
53915     53915     gansu          106.6900       35.5600           98       147     2012      04        09        100              0.134750      15.942657      13.637978       0.213196       0.114000   -9999.000000       0.095100       0.771000
53915     53915     gansu          106.6900       35.5600           98       147     2012      04        10        101              0.141708       9.570831       3.056979       0.298779       0.079000   -9999.000000       0.068300       0.580000
53915     53915     gansu          106.6900       35.5600           98       147     2012      04        11        102              0.139833      14.831604       2.992807       0.286912       0.084000   -9999.000000       0.076700       0.388000
53915     53915     gansu          106.6900       35.5600           98       147     2012      04        12        103              0.138875       7.449097       0.060482       0.287758   -9999.000000   -9999.000000   -9999.000000       0.276000
53915     53915     gansu          106.6900       35.5600           98       147     2012      04        13        104              0.139500       7.532074       0.000000       0.275024       0.077000   -9999.000000       0.073300   -9999.000000
53915     53915     gansu          106.6900       35.5600           98       147     2012      04        14        105              0.139458      12.004791       0.920397       0.265605       0.057000   -9999.000000       0.050900       0.183000
53915     53915     gansu          106.6900       35.5600           98       147     2012      04        15        106              0.138417      14.303406       0.000000       0.259158       0.066000   -9999.000000       0.062200       0.445000
53915     53915     gansu          106.6900       35.5600           98       147     2012      04        16        107              0.135583      15.968384       0.000000       0.251005       0.071000   -9999.000000       0.059400       0.148000
53915     53915     gansu          106.6900       35.5600           98       147     2012      04        17        108              0.134375      14.823608       1.208861       0.247638       0.092000   -9999.000000       0.090700       0.622000
53915     53915     gansu          106.6900       35.5600           98       147     2012      04        18        109              0.139000      11.248505       0.101119       0.260252       0.074000   -9999.000000   -9999.000000   -9999.000000
53915     53915     gansu          106.6900       35.5600           98       147     2012      04        19        110              0.135625      16.441772       3.525059       0.249009       0.081000       0.008500       0.079000       0.572000
53915     53915     gansu          106.6900       35.5600           98       147     2012      04        20        111              0.136333      11.536438       0.000000       0.271158       0.066000   -9999.000000       0.059200       0.390000
53915     53915     gansu          106.6900       35.5600           98       147     2012      04        21        112              0.136667      14.484589       0.000000       0.259258       0.063000   -9999.000000       0.069300       0.233000
53915     53915     gansu          106.6900       35.5600           98       147     2012      04        22        113              0.135458      18.013306       2.617986       0.246360       0.082000   -9999.000000   -9999.000000       0.330000
53915     53915     gansu          106.6900       35.5600           98       147     2012      04        23        114              0.152000      19.901733      12.870021       0.238593       0.122000   -9999.000000       0.092100   -9999.000000
53915     53915     gansu          106.6900       35.5600           98       147     2012      04        24        115              0.166417      13.487793       0.000000       0.296717   -9999.000000   -9999.000000   -9999.000000       0.677000
53915     53915     gansu          106.6900       35.5600           98       147     2012      04        25        116              0.000000      13.338287       0.000000       0.279314       0.083500   -9999.000000       0.079200   -9999.000000
53915     53915     gansu          106.6900       35.5600           98       147     2012      04        26        117              0.149708      14.624023       0.000000       0.264738       0.074500   -9999.000000       0.079000       0.280000
53915     53915     gansu          106.6900       35.5600           98       147     2012      04        27        118              0.145250      17.171387       0.000000       0.254004       0.076000   -9999.000000       0.066200       0.387000
53915     53915     gansu          106.6900       35.5600           98       147     2012      04        28        119              0.140292      18.823273       8.213085       0.245254   -9999.000000   -9999.000000       0.083600   -9999.000000
53915     53915     gansu          106.6900       35.5600           98       147     2012      04        29        120              0.141478      17.029724       0.000000       0.282297       0.089000   -9999.000000   -9999.000000       0.447000
53915     53915     gansu          106.6900       35.5600           98       147     2012      04        30        121              0.157583      19.863007       0.229297       0.269896       0.126000   -9999.000000       0.102800   -9999.000000
53915     53915     gansu          106.6900       35.5600           98       147     2012      05        01        122              0.170667      13.509003       1.884858       0.269782       0.126000   -9999.000000       0.078000       0.607000
53915     53915     gansu          106.6900       35.5600           98       147     2012      05        02        123              0.169708      15.074738       3.282326       0.274393       0.134000   -9999.000000       0.097400   -9999.000000
53915     53915     gansu          106.6900       35.5600           98       147     2012      05        03        124              0.176208      14.174835       1.154606       0.285345   -9999.000000   -9999.000000       0.085500   -9999.000000
53915     53915     gansu          106.6900       35.5600           98       147     2012      05        04        125              0.174875      14.245026       0.545989       0.285400       0.117000   -9999.000000       0.085300       0.773000
53915     53915     gansu          106.6900       35.5600           98       147     2012      05        05        126              0.168750      16.036438       2.519917       0.278058       0.101500   -9999.000000   -9999.000000   -9999.000000
53915     53915     gansu          106.6900       35.5600           98       147     2012      05        06        127              0.163083      19.594055       1.624835       0.266219       0.129000   -9999.000000       0.078800       0.599000
53915     53915     gansu          106.6900       35.5600           98       147     2012      05        07        128              0.166375      16.819489       0.982437       0.273238   -9999.000000   -9999.000000       0.094200   -9999.000000
53915     53915     gansu          106.6900       35.5600           98       147     2012      05        08        129              0.159875      20.172638       0.000000       0.267676       0.093000   -9999.000000       0.075600       0.390000
53915     53915     gansu          106.6900       35.5600           98       147     2012      05        09        130              0.153708      21.646545       0.897900       0.257191   -9999.000000   -9999.000000       0.081500       0.516000
53915     53915     gansu          106.6900       35.5600           98       147     2012      05        10        131              0.175583      20.887024      11.776772       0.260590       0.109500   -9999.000000       0.075800       0.184000
53915     53915     gansu          106.6900       35.5600           98       147     2012      05        11        132              0.217600      19.037506       0.223364       0.292726       0.136500   -9999.000000   -9999.000000       0.490000
53915     53915     gansu          106.6900       35.5600           98       147     2012      05        12        133              0.178846      17.106445       0.000000       0.287225       0.103000   -9999.000000       0.080900   -9999.000000
53915     53915     gansu          106.6900       35.5600           98       147     2012      05        13        134              0.170625      14.441650       0.403461       0.273480       0.137000   -9999.000000       0.088300       0.366000
53915     53915     gansu          106.6900       35.5600           98       147     2012      05        14        135              0.163800      12.771423       0.000000       0.268929       0.117000   -9999.000000       0.083700       0.319000
53915     53915     gansu          106.6900       35.5600           98       147     2012      05        15        136              0.158500      16.848938       0.000000       0.258713       0.126000   -9999.000000       0.086900       0.113000
53915     53915     gansu          106.6900       35.5600           98       147     2012      05        16        137              0.153667      18.764343       0.113004       0.249520       0.102000   -9999.000000   -9999.000000       0.285000
53915     53915     gansu          106.6900       35.5600           98       147     2012      05        17        138              0.148625      19.388306       0.000000       0.240533       0.103500   -9999.000000       0.095800   -9999.000000
53915     53915     gansu          106.6900       35.5600           98       147     2012      05        18        139              0.145208      19.819763       0.066410       0.235713       0.101000   -9999.000000       0.074900       0.573000
53915     53915     gansu          106.6900       35.5600           98       147     2012      05        19        140              0.143833      20.517334       0.767889       0.231525       0.114000   -9999.000000       0.092200       0.344000
53915     53915     gansu          106.6900       35.5600           98       147     2012      05        20        141              0.140083      22.749359       3.660779       0.227893   -9999.000000   -9999.000000       0.082600       0.259000
53915     53915     gansu          106.6900       35.5600           98       147     2012      05        21        142              0.155208      19.987610       4.249819       0.239761       0.194500   -9999.000000       0.128900       0.755000
53915     53915     gansu          106.6900       35.5600           98       147     2012      05        22        143              0.158333      14.503204       0.267578       0.284549       0.149500   -9999.000000   -9999.000000   -9999.000000
53915     53915     gansu          106.6900       35.5600           98       147     2012      05        23        144              0.149625      16.254303       0.086191       0.265279   -9999.000000   -9999.000000       0.116400       0.648000
53915     53915     gansu          106.6900       35.5600           98       147     2012      05        24        145              0.146833      13.235748       0.371729       0.261532   -9999.000000   -9999.000000       0.114400   -9999.000000
53915     53915     gansu          106.6900       35.5600           98       147     2012      05        25        146              0.000000      15.941223       0.323696       0.256208       0.147000   -9999.000000       0.097500       0.180000
53915     53915     gansu          106.6900       35.5600           98       147     2012      05        26        147              0.144083      17.482086       0.000000       0.249351       0.125000   -9999.000000       0.095600       0.393000
53915     53915     gansu          106.6900       35.5600           98       147     2012      05        27        148              0.142542      21.119141       0.000000       0.239458       0.118000   -9999.000000   -9999.000000   -9999.000000
53915     53915     gansu          106.6900       35.5600           98       147     2012      05        28        149              0.160958      22.766052      14.942673       0.230279       0.185000   -9999.000000   -9999.000000       1.000000
53915     53915     gansu          106.6900       35.5600           98       147     2012      05        29        150              0.175917      14.786835       0.000000       0.300385       0.139000   -9999.000000       0.104200   -9999.000000
53915     53915     gansu          106.6900       35.5600           98       147     2012      05        30        151              0.169000      19.556732       0.000000       0.279706       0.145000   -9999.000000       0.109100   -9999.000000
53915     53915     gansu          106.6900       35.5600           98       147     2012      05        31        152              0.161042      20.569000       0.079155       0.264970       0.148000   -9999.000000       0.090300   -9999.000000
53915     53915     gansu          106.6900       35.5600           98       147     2012      06        01        153              0.157833      18.900696       0.000000       0.259331       0.151000   -9999.000000       0.094400   -9999.000000
53915     53915     gansu          106.6900       35.5600           98       147     2012      06        02        154              0.153875      21.501892       0.000000       0.248902       0.118000   -9999.000000   -9999.000000       0.411000
53915     53915     gansu          106.6900       35.5600           98       147     2012      06        03        155              0.151667      21.999237       9.847239       0.241973       0.145000   -9999.000000   -9999.000000   -9999.000000
53915     53915     gansu          106.6900       35.5600           98       147     2012      06        04        156              0.154125      20.395233       0.688228       0.286721       0.152000   -9999.000000       0.097900       0.442000
53915     53915     gansu          106.6900       35.5600           98       147     2012      06        05        157              0.150583      21.084839       4.977331       0.275479       0.183000   -9999.000000       0.134000   -9999.000000
53915     53915     gansu          106.6900       35.5600           98       147     2012      06        06        158              0.154667      16.421844       0.069002       0.292479       0.149000   -9999.000000       0.102200       0.688000
53915     53915     gansu          106.6900       35.5600           98       147     2012      06        07        159              0.153375      19.651947       0.000000       0.276529       0.127000   -9999.000000       0.099800       0.434000
53915     53915     gansu          106.6900       35.5600           98       147     2012      06        08        160              0.146458      21.182312       0.198184       0.262570       0.135000   -9999.000000   -9999.000000       0.312000
53915     53915     gansu          106.6900       35.5600           98       147     2012      06        09        161              0.148125      19.082001       0.000000       0.259077   -9999.000000   -9999.000000       0.099200       0.438000
53915     53915     gansu          106.6900       35.5600           98       147     2012      06        10        162              0.145458      23.280182       0.000000       0.247904       0.142000   -9999.000000       0.104800   -9999.000000
53915     53915     gansu          106.6900       35.5600           98       147     2012      06        11        163              0.000000      22.408966       0.000000       0.237515       0.123500   -9999.000000       0.107700       0.279000
53915     53915     gansu          106.6900       35.5600           98       147     2012      06        12        164              0.141917      21.599762       0.000000       0.231883       0.125500   -9999.000000       0.114700       0.475000
53915     53915     gansu          106.6900       35.5600           98       147     2012      06        13        165              0.140042      24.394165       0.310981       0.220438       0.127000   -9999.000000   -9999.000000       0.380000
53915     53915     gansu          106.6900       35.5600           98       147     2012      06        14        166              0.137583      24.546051       0.000000       0.214404   -9999.000000   -9999.000000   -9999.000000       0.317000
53915     53915     gansu          106.6900       35.5600           98       147     2012      06        15        167              0.136375      22.450897       0.000000       0.207421       0.147000   -9999.000000       0.101900   -9999.000000
53915     53915     gansu          106.6900       35.5600           98       147     2012      06        16        168              0.135458      23.230743       0.000000       0.201875       0.127500   -9999.000000       0.123800       0.438000
53915     53915     gansu          106.6900       35.5600           98       147     2012      06        17        169              0.134250      24.460846       0.000000       0.196206       0.141000   -9999.000000       0.108700       0.480000
53915     53915     gansu          106.6900       35.5600           98       147     2012      06        18        170              0.139000      24.912262       8.616546       0.192192   -9999.000000   -9999.000000       0.113300       0.351000
53915     53915     gansu          106.6900       35.5600           98       147     2012      06        19        171              0.145958      22.523560       0.000000       0.257253       0.128000   -9999.000000   -9999.000000       0.485000
53915     53915     gansu          106.6900       35.5600           98       147     2012      06        20        172              0.142542      23.809113       0.561522       0.241776       0.151000   -9999.000000       0.115800   -9999.000000
53915     53915     gansu          106.6900       35.5600           98       147     2012      06        21        173              0.141042      24.264069       0.916453       0.229300       0.148000   -9999.000000       0.089000       0.495000
53915     53915     gansu          106.6900       35.5600           98       147     2012      06        22        174              0.139000      24.569366       0.459135       0.224208       0.121500   -9999.000000       0.110600   -9999.000000
53915     53915     gansu          106.6900       35.5600           98       147     2012      06        23        175              0.137583      25.648163       4.920959       0.213593       0.124000   -9999.000000       0.106200       0.861000
53915     53915     gansu          106.6900       35.5600           98       147     2012      06        24        176              0.137542      24.890778       0.355617       0.233659       0.171000   -9999.000000       0.110900       0.533000
53915     53915     gansu          106.6900       35.5600           98       147     2012      06        25        177              0.138125      22.619110       1.725571       0.241637       0.168000       0.029400   -9999.000000   -9999.000000
53915     53915     gansu          106.6900       35.5600           98       147     2012      06        26        178              0.139500      23.839020       5.842211       0.231435       0.180000   -9999.000000       0.144900       0.839000
53915     53915     gansu          106.6900       35.5600           98       147     2012      06        27        179              0.187042      21.188049      17.895206       0.258819       0.204500       0.022000       0.154800   -9999.000000
53915     53915     gansu          106.6900       35.5600           98       147     2012      06        28        180              0.253292      19.592560      22.937525       0.307932       0.207000   -9999.000000       0.135400       0.984000
53915     53915     gansu          106.6900       35.5600           98       147     2012      06        29        181              0.247583      19.252655       0.912923       0.339329       0.208000   -9999.000000       0.152300   -9999.000000
53915     53915     gansu          106.6900       35.5600           98       147     2012      06        30        182              0.229875      20.733093       0.000000       0.329211   -9999.000000   -9999.000000   -9999.000000   -9999.000000
53915     53915     gansu          106.6900       35.5600           98       147     2012      07        01        183              0.215458      23.537231       1.473216       0.304471       0.164000   -9999.000000       0.140400       0.590000
53915     53915     gansu          106.6900       35.5600           98       147     2012      07        02        184              0.205375      24.527039       0.000000       0.293470       0.146000   -9999.000000       0.118600   -9999.000000
53915     53915     gansu          106.6900       35.5600           98       147     2012      07        03        185              0.196833      24.434479       0.000000       0.289455       0.147000   -9999.000000       0.137800       0.572000
53915     53915     gansu          106.6900       35.5600           98       147     2012      07        04        186              0.188667      24.331665       1.762569       0.279146       0.133000   -9999.000000       0.132100   -9999.000000
53915     53915     gansu          106.6900       35.5600           98       147     2012      07        05        187              0.182333      23.787354       0.000000       0.279800       0.114000   -9999.000000       0.129700       0.557000
53915     53915     gansu          106.6900       35.5600           98       147     2012      07        06        188              0.174542      25.001434       4.053676       0.269081   -9999.000000   -9999.000000   -9999.000000       0.899000
53915     53915     gansu          106.6900       35.5600           98       147     2012      07        07        189              0.175750      21.808777       0.258785       0.282867   -9999.000000   -9999.000000       0.144400       0.706000
53915     53915     gansu          106.6900       35.5600           98       147     2012      07        08        190              0.235000      24.987610      16.735415       0.275178       0.182500       0.201000       0.152500       0.922000
53915     53915     gansu          106.6900       35.5600           98       147     2012      07        09        191              0.231042      20.280121       0.133691       0.328954       0.172000   -9999.000000       0.152200   -9999.000000
53915     53915     gansu          106.6900       35.5600           98       147     2012      07        10        192              0.214708      21.817017       0.000000       0.303313       0.142000   -9999.000000       0.134600       0.781000
53915     53915     gansu          106.6900       35.5600           98       147     2012      07        11        193              0.197000      25.558289       0.106689       0.286277       0.161000   -9999.000000       0.126800       0.663000
53915     53915     gansu          106.6900       35.5600           98       147     2012      07        12        194              0.185667      22.270020       0.112191       0.281676       0.138000   -9999.000000   -9999.000000       0.570000
53915     53915     gansu          106.6900       35.5600           98       147     2012      07        13        195              0.175208      24.847107       0.163656       0.272543       0.143500   -9999.000000       0.121500       0.530000
53915     53915     gansu          106.6900       35.5600           98       147     2012      07        14        196              0.170458      23.549622       0.228266       0.268041       0.133500   -9999.000000       0.130200   -9999.000000
53915     53915     gansu          106.6900       35.5600           98       147     2012      07        15        197              0.165208      25.237762       0.000000       0.260694       0.133000   -9999.000000       0.114900       0.505000
53915     53915     gansu          106.6900       35.5600           98       147     2012      07        16        198              0.160208      25.984833       0.813202       0.253880   -9999.000000   -9999.000000       0.096300       0.638000
53915     53915     gansu          106.6900       35.5600           98       147     2012      07        17        199              0.155167      25.389343       3.422635       0.249638       0.153000   -9999.000000   -9999.000000       0.750000
53915     53915     gansu          106.6900       35.5600           98       147     2012      07        18        200              0.156625      21.157776       0.000000       0.276110       0.144000   -9999.000000       0.106800       0.572000
53915     53915     gansu          106.6900       35.5600           98       147     2012      07        19        201              0.152875      23.838531       0.695721       0.262877       0.149500   -9999.000000       0.089600   -9999.000000
53915     53915     gansu          106.6900       35.5600           98       147     2012      07        20        202              0.153125      22.829376       6.417412       0.262888       0.158000   -9999.000000       0.120000       0.837000
53915     53915     gansu          106.6900       35.5600           98       147     2012      07        21        203              0.203273      23.177368      13.430026       0.281481   -9999.000000   -9999.000000       0.099900   -9999.000000
53915     53915     gansu          106.6900       35.5600           98       147     2012      07        22        204              0.197875      19.985535       1.871677       0.327680       0.206000   -9999.000000       0.108500       0.670000
53915     53915     gansu          106.6900       35.5600           98       147     2012      07        23        205              0.178208      23.826508       0.000000       0.296019       0.199000       0.100400   -9999.000000       0.635000
53915     53915     gansu          106.6900       35.5600           98       147     2012      07        24        206              0.165583      22.103851       2.221848       0.285853   -9999.000000   -9999.000000       0.112600   -9999.000000
53915     53915     gansu          106.6900       35.5600           98       147     2012      07        25        207              0.163958      21.126923       0.058356       0.290459       0.175000   -9999.000000       0.110000       0.705000
53915     53915     gansu          106.6900       35.5600           98       147     2012      07        26        208              0.160292      24.748291       0.349125       0.284734       0.183000       0.106900       0.099500   -9999.000000
53915     53915     gansu          106.6900       35.5600           98       147     2012      07        27        209              0.156625      24.493652       0.000000       0.278903   -9999.000000   -9999.000000       0.101500       0.530000
53915     53915     gansu          106.6900       35.5600           98       147     2012      07        28        210              0.154292      25.341797       1.951687       0.271516       0.180000   -9999.000000   -9999.000000   -9999.000000
53915     53915     gansu          106.6900       35.5600           98       147     2012      07        29        211              0.149958      26.383728       0.000000       0.269510       0.148000   -9999.000000   -9999.000000   -9999.000000
53915     53915     gansu          106.6900       35.5600           98       147     2012      07        30        212              0.144417      27.535309       4.195638       0.258492       0.185000   -9999.000000       0.108600       0.821000
53915     53915     gansu          106.6900       35.5600           98       147     2012      07        31        213              0.149958      20.736298       2.020740       0.281702       0.191000       0.023500       0.115600   -9999.000000
53915     53915     gansu          106.6900       35.5600           98       147     2012      08        01        214              0.151208      21.168945       0.472415       0.283001   -9999.000000   -9999.000000       0.102300       0.639000
53915     53915     gansu          106.6900       35.5600           98       147     2012      08        02        215              0.149958      21.821136       0.049564       0.273622       0.163000       0.157700       0.104000   -9999.000000
53915     53915     gansu          106.6900       35.5600           98       147     2012      08        03        216              0.146792      25.222687       0.804243       0.261850       0.160500   -9999.000000   -9999.000000       0.367000
53915     53915     gansu          106.6900       35.5600           98       147     2012      08        04        217              0.151042      25.808228       2.905550       0.256048       0.156000       0.065900       0.113100       0.823000
53915     53915     gansu          106.6900       35.5600           98       147     2012      08        05        218              0.152958      23.461761       7.349307       0.278223       0.138000       0.082600       0.101700       0.584000
53915     53915     gansu          106.6900       35.5600           98       147     2012      08        06        219              0.153000      24.717407       3.925546       0.277458       0.160000   -9999.000000       0.120800       0.773000
53915     53915     gansu          106.6900       35.5600           98       147     2012      08        07        220              0.149292      23.973297       0.907612       0.299916       0.165000   -9999.000000       0.105000   -9999.000000
53915     53915     gansu          106.6900       35.5600           98       147     2012      08        08        221              0.146708      25.623810       6.319678       0.280909       0.180000   -9999.000000       0.108800       0.511000
53915     53915     gansu          106.6900       35.5600           98       147     2012      08        09        222              0.149333      24.667572       0.176678       0.294745       0.148000   -9999.000000   -9999.000000       0.801000
53915     53915     gansu          106.6900       35.5600           98       147     2012      08        10        223              0.143917      25.704071       0.585850       0.284985       0.147000   -9999.000000       0.114300       0.675000
53915     53915     gansu          106.6900       35.5600           98       147     2012      08        11        224              0.142042      23.478119       0.161902       0.277980       0.156000   -9999.000000       0.118800       0.687000
53915     53915     gansu          106.6900       35.5600           98       147     2012      08        12        225              0.138875      24.558777       1.188381       0.272561   -9999.000000       0.103800       0.104900   -9999.000000
53915     53915     gansu          106.6900       35.5600           98       147     2012      08        13        226              0.141667      24.068878      10.270666       0.270479       0.202000       0.016000       0.138300       0.914000
53915     53915     gansu          106.6900       35.5600           98       147     2012      08        14        227              0.165333      21.222900       1.159755       0.301736       0.187000   -9999.000000   -9999.000000       0.892000
53915     53915     gansu          106.6900       35.5600           98       147     2012      08        15        228              0.157542      22.845032       0.000000       0.301164       0.161000   -9999.000000   -9999.000000       0.720000
53915     53915     gansu          106.6900       35.5600           98       147     2012      08        16        229              0.148167      24.274353       1.261757       0.282230       0.163000   -9999.000000       0.135100       0.815000
53915     53915     gansu          106.6900       35.5600           98       147     2012      08        17        230              0.257083      21.350159      29.368851       0.285715   -9999.000000   -9999.000000       0.143400   -9999.000000
53915     53915     gansu          106.6900       35.5600           98       147     2012      08        18        231              0.268583      19.381805      16.285378       0.354092       0.214000       0.132400       0.135600       1.000000
53915     53915     gansu          106.6900       35.5600           98       147     2012      08        19        232              0.246708      17.888824       0.026985       0.355013       0.206000   -9999.000000       0.146900   -9999.000000
53915     53915     gansu          106.6900       35.5600           98       147     2012      08        20        233              0.250167      20.477203       6.874665       0.328856       0.166000       0.223700   -9999.000000       0.775000
53915     53915     gansu          106.6900       35.5600           98       147     2012      08        21        234              0.249542      21.975037       0.000000       0.327668       0.165500   -9999.000000       0.137100   -9999.000000
53915     53915     gansu          106.6900       35.5600           98       147     2012      08        22        235              0.231958      20.133270       0.000000       0.320766       0.158000   -9999.000000       0.113700   -9999.000000
53915     53915     gansu          106.6900       35.5600           98       147     2012      08        23        236              0.216958      20.526062       0.000000       0.310299   -9999.000000   -9999.000000       0.131900       0.715000
53915     53915     gansu          106.6900       35.5600           98       147     2012      08        24        237              0.205792      20.970215       0.000000       0.304060   -9999.000000   -9999.000000       0.114700   -9999.000000
53915     53915     gansu          106.6900       35.5600           98       147     2012      08        25        238              0.000000      21.453217      11.649958       0.298848       0.183000   -9999.000000       0.109400       0.942000
53915     53915     gansu          106.6900       35.5600           98       147     2012      08        26        239              0.227375      20.156006       1.265919       0.324553       0.143000   -9999.000000   -9999.000000   -9999.000000
53915     53915     gansu          106.6900       35.5600           98       147     2012      08        27        240              0.218833      21.616852       3.313205       0.313647       0.151000       0.027200       0.134600   -9999.000000
53915     53915     gansu          106.6900       35.5600           98       147     2012      08        28        241              0.212042      20.797699       0.244493       0.315464       0.151000   -9999.000000       0.127400       0.686000
53915     53915     gansu          106.6900       35.5600           98       147     2012      08        29        242              0.198250      21.866272       0.000000       0.302037       0.154000   -9999.000000       0.109500   -9999.000000
53915     53915     gansu          106.6900       35.5600           98       147     2012      08        30        243              0.203208      22.532227      15.860219       0.293817   -9999.000000   -9999.000000       0.118300       0.713000
53915     53915     gansu          106.6900       35.5600           98       147     2012      08        31        244              0.286000      22.579773      22.112261       0.310019       0.205000       0.121600   -9999.000000   -9999.000000
53915     53915     gansu          106.6900       35.5600           98       147     2012      09        01        245              0.276042      18.474915      11.032397       0.356690   -9999.000000   -9999.000000       0.153800       0.997000
53915     53915     gansu          106.6900       35.5600           98       147     2012      09        02        246              0.253792      14.326782       0.000000       0.358722       0.157000   -9999.000000       0.129200       0.899000
53915     53915     gansu          106.6900       35.5600           98       147     2012      09        03        247              0.239167      18.365570       0.000000       0.332794       0.161000   -9999.000000       0.112200       0.879000
53915     53915     gansu          106.6900       35.5600           98       147     2012      09        04        248              0.230375      18.983215       0.000000       0.322537       0.154000   -9999.000000       0.103200       0.769000
53915     53915     gansu          106.6900       35.5600           98       147     2012      09        05        249              0.226375      18.017670       0.042593       0.317915       0.129000       0.020000       0.105000   -9999.000000
53915     53915     gansu          106.6900       35.5600           98       147     2012      09        06        250              0.220625      19.832306       3.843208       0.313683       0.126500   -9999.000000   -9999.000000       0.690000
53915     53915     gansu          106.6900       35.5600           98       147     2012      09        07        251              0.232083      21.116608       5.308062       0.319699       0.160000   -9999.000000       0.110500       1.000000
53915     53915     gansu          106.6900       35.5600           98       147     2012      09        08        252              0.237083      18.318604       0.583300       0.326848   -9999.000000   -9999.000000       0.102900       0.876000
53915     53915     gansu          106.6900       35.5600           98       147     2012      09        09        253              0.229833      19.655212       2.394978       0.316545       0.164000   -9999.000000       0.120700       0.956000
53915     53915     gansu          106.6900       35.5600           98       147     2012      09        10        254              0.243542      17.604034       4.297654       0.318609       0.180500       0.072700       0.139300   -9999.000000
53915     53915     gansu          106.6900       35.5600           98       147     2012      09        11        255              0.233667      16.826324       0.000000       0.328448       0.173500   -9999.000000       0.130100       0.779000
53915     53915     gansu          106.6900       35.5600           98       147     2012      09        12        256              0.218292      15.938171       0.000000       0.315185       0.149000   -9999.000000   -9999.000000       0.777000
53915     53915     gansu          106.6900       35.5600           98       147     2012      09        13        257              0.208250      12.419556       0.000000       0.309503       0.147000   -9999.000000       0.114800       0.677000
53915     53915     gansu          106.6900       35.5600           98       147     2012      09        14        258              0.196667      14.955109       0.000000       0.303438       0.151000   -9999.000000       0.122800       0.624000
53915     53915     gansu          106.6900       35.5600           98       147     2012      09        15        259              0.189708      15.973053       2.057707       0.298777       0.205000       0.040600       0.116800   -9999.000000
53915     53915     gansu          106.6900       35.5600           98       147     2012      09        16        260              0.193318      13.338257       0.547825       0.304779       0.183500   -9999.000000       0.131300       0.787000
53915     53915     gansu          106.6900       35.5600           98       147     2012      09        17        261              0.193792      12.692688       0.061997       0.308514       0.151000   -9999.000000   -9999.000000   -9999.000000
53915     53915     gansu          106.6900       35.5600           98       147     2012      09        18        262              0.185500      17.021637       0.101851       0.300854       0.153000       0.087400       0.111900       0.628000
53915     53915     gansu          106.6900       35.5600           98       147     2012      09        19        263              0.176375      17.722870       0.000000       0.295067   -9999.000000   -9999.000000       0.085700       0.549000
53915     53915     gansu          106.6900       35.5600           98       147     2012      09        20        264              0.231650      18.519470      18.215479       0.289809       0.202000   -9999.000000       0.128000   -9999.000000
53915     53915     gansu          106.6900       35.5600           98       147     2012      09        21        265              0.249167      13.906982       0.000000       0.338502   -9999.000000   -9999.000000       0.119500       0.801000
53915     53915     gansu          106.6900       35.5600           98       147     2012      09        22        266              0.233958      17.361328       0.105290       0.318458       0.122500   -9999.000000       0.114200   -9999.000000
53915     53915     gansu          106.6900       35.5600           98       147     2012      09        23        267              0.224750      17.424591       0.114791       0.310324       0.107000       0.135400   -9999.000000       0.671000
53915     53915     gansu          106.6900       35.5600           98       147     2012      09        24        268              0.258278      17.556274      30.178707       0.306159       0.176000   -9999.000000       0.142200   -9999.000000
53915     53915     gansu          106.6900       35.5600           98       147     2012      09        25        269              0.277045      13.711273       4.072109       0.354386       0.164000       0.131500       0.149400   -9999.000000
53915     53915     gansu          106.6900       35.5600           98       147     2012      09        26        270              0.260958      12.955597       0.000000       0.351163       0.156000   -9999.000000       0.137800       0.895000
53915     53915     gansu          106.6900       35.5600           98       147     2012      09        27        271              0.251143      16.440063       0.000000       0.331699       0.152000   -9999.000000       0.142400   -9999.000000
53915     53915     gansu          106.6900       35.5600           98       147     2012      09        28        272              0.232733      13.269379       0.221950       0.322509       0.133000   -9999.000000       0.140300       0.665000
53915     53915     gansu          106.6900       35.5600           98       147     2012      09        29        273              0.228250      12.301697       0.000000       0.317496       0.128000   -9999.000000   -9999.000000   -9999.000000
53915     53915     gansu          106.6900       35.5600           98       147     2012      09        30        274              0.221417      13.950256       0.000000       0.313851       0.144000   -9999.000000       0.121600       0.634000
53915     53915     gansu          106.6900       35.5600           98       147     2012      10        01        275              0.215958      15.279480       0.000000       0.309685       0.132000   -9999.000000       0.100400       0.751000
53915     53915     gansu          106.6900       35.5600           98       147     2012      10        02        276              0.213000      16.218536       0.359046       0.306408       0.134000       0.024500       0.093500       0.690000
53915     53915     gansu          106.6900       35.5600           98       147     2012      10        03        277              0.211208      14.071472       0.000000       0.307561       0.119000       0.045200       0.096400       0.632000
53915     53915     gansu          106.6900       35.5600           98       147     2012      10        04        278              0.207292      15.883118       1.498562       0.302326       0.131000   -9999.000000   -9999.000000   -9999.000000
53915     53915     gansu          106.6900       35.5600           98       147     2012      10        05        279              0.205208      12.015869       0.411992       0.307528   -9999.000000   -9999.000000       0.108800       0.570000
53915     53915     gansu          106.6900       35.5600           98       147     2012      10        06        280              0.204478      13.743927       1.142040       0.301817       0.133000   -9999.000000       0.086600       0.809000
53915     53915     gansu          106.6900       35.5600           98       147     2012      10        07        281              0.205217      11.168854       0.650467       0.306918       0.125500   -9999.000000       0.103700       0.656000
53915     53915     gansu          106.6900       35.5600           98       147     2012      10        08        282              0.202458      13.399414       0.410801       0.302743       0.127500       0.095900       0.090400       0.682000
53915     53915     gansu          106.6900       35.5600           98       147     2012      10        09        283              0.198292      11.583374       0.000000       0.302788       0.109000   -9999.000000       0.088900   -9999.000000
53915     53915     gansu          106.6900       35.5600           98       147     2012      10        10        284              0.190917      12.957123       0.000000       0.297627       0.121000   -9999.000000   -9999.000000       0.615000
53915     53915     gansu          106.6900       35.5600           98       147     2012      10        11        285              0.186917      13.684998       0.000000       0.294967       0.100000       0.017700       0.087600       0.719000
53915     53915     gansu          106.6900       35.5600           98       147     2012      10        12        286              0.182083      13.690857       0.000000       0.293386       0.103000   -9999.000000       0.091900       0.593000
53915     53915     gansu          106.6900       35.5600           98       147     2012      10        13        287              0.176417      13.449860       0.000000       0.290798       0.093000       0.070700       0.076500       0.527000
53915     53915     gansu          106.6900       35.5600           98       147     2012      10        14        288              0.173625      13.756561       1.091332       0.287796       0.102500   -9999.000000       0.092500   -9999.000000
53915     53915     gansu          106.6900       35.5600           98       147     2012      10        15        289              0.174667      11.470978       2.313543       0.292037       0.129000   -9999.000000   -9999.000000       0.695000
53915     53915     gansu          106.6900       35.5600           98       147     2012      10        16        290              0.176042       9.632324       0.357607       0.302174   -9999.000000       0.118000   -9999.000000   -9999.000000
53915     53915     gansu          106.6900       35.5600           98       147     2012      10        17        291              0.173375       8.553284       0.307455       0.295826       0.104000   -9999.000000       0.083200       0.577000
53915     53915     gansu          106.6900       35.5600           98       147     2012      10        18        292              0.178957      11.177460       7.159726       0.291534       0.122000   -9999.000000       0.105800       0.759000
53915     53915     gansu          106.6900       35.5600           98       147     2012      10        19        293              0.185000       7.064880       0.056155       0.318863       0.105500   -9999.000000       0.095000   -9999.000000
53915     53915     gansu          106.6900       35.5600           98       147     2012      10        20        294              0.184125      11.150360       0.117004       0.303901       0.111000   -9999.000000       0.101300       0.735000
53915     53915     gansu          106.6900       35.5600           98       147     2012      10        21        295              0.181167      12.140656       1.324330       0.300363   -9999.000000       0.070700   -9999.000000   -9999.000000
53915     53915     gansu          106.6900       35.5600           98       147     2012      10        22        296              0.179333       5.334412       2.336055       0.302037   -9999.000000   -9999.000000       0.092000       0.620000
53915     53915     gansu          106.6900       35.5600           98       147     2012      10        23        297              0.176250       9.112488       0.322528       0.297151   -9999.000000   -9999.000000       0.080600   -9999.000000
53915     53915     gansu          106.6900       35.5600           98       147     2012      10        24        298              0.174042       7.814087       0.472443       0.296529   -9999.000000   -9999.000000       0.095700   -9999.000000
53915     53915     gansu          106.6900       35.5600           98       147     2012      10        25        299              0.000000       8.904877       0.246714       0.293326       0.119500   -9999.000000       0.085900       0.659000
53915     53915     gansu          106.6900       35.5600           98       147     2012      10        26        300              0.170042      10.060272       0.000000       0.291913       0.124000   -9999.000000       0.089600   -9999.000000
53915     53915     gansu          106.6900       35.5600           98       147     2012      10        27        301              0.166417      10.887695       0.000000       0.289175       0.119000   -9999.000000   -9999.000000       0.548000
53915     53915     gansu          106.6900       35.5600           98       147     2012      10        28        302              0.000000      10.920776       0.647437       0.287473       0.118000   -9999.000000       0.087600   -9999.000000
53915     53915     gansu          106.6900       35.5600           98       147     2012      10        29        303              0.162333      10.685364       0.000000       0.287465       0.103000   -9999.000000       0.088900       0.391000
53915     53915     gansu          106.6900       35.5600           98       147     2012      10        30        304              0.158875       8.699585       0.000000       0.284586       0.112000   -9999.000000       0.073000       0.593000
53915     53915     gansu          106.6900       35.5600           98       147     2012      10        31        305              0.157042       7.956909       0.000000       0.282082       0.117000   -9999.000000       0.083500       0.449000
53915     53915     gansu          106.6900       35.5600           98       147     2012      11        01        306              0.156125       8.475494       0.000000       0.281117   -9999.000000   -9999.000000   -9999.000000       0.523000
53915     53915     gansu          106.6900       35.5600           98       147     2012      11        02        307              0.154375       8.844391       0.268146       0.281135   -9999.000000   -9999.000000       0.085500   -9999.000000
53915     53915     gansu          106.6900       35.5600           98       147     2012      11        03        308              0.151042       7.796539       0.000000       0.272177       0.103000   -9999.000000       0.063300       0.213000
53915     53915     gansu          106.6900       35.5600           98       147     2012      11        04        309              0.150167       1.985992       0.000000       0.235766       0.101000   -9999.000000       0.084100       0.483000
53915     53915     gansu          106.6900       35.5600           98       147     2012      11        05        310              0.150250       2.855286       0.000000       0.244721       0.096000   -9999.000000       0.069300   -9999.000000
53915     53915     gansu          106.6900       35.5600           98       147     2012      11        06        311              0.150417       4.021729       0.136308       0.260962       0.104000   -9999.000000       0.079900       0.435000
53915     53915     gansu          106.6900       35.5600           98       147     2012      11        07        312              0.150042       5.022522       0.547778       0.275916   -9999.000000   -9999.000000   -9999.000000   -9999.000000
53915     53915     gansu          106.6900       35.5600           98       147     2012      11        08        313              0.150000       3.701691       0.000000       0.265375       0.099000   -9999.000000       0.084200       0.469000
53915     53915     gansu          106.6900       35.5600           98       147     2012      11        09        314              0.151474       5.134918       0.268730       0.275792   -9999.000000   -9999.000000       0.070100       0.684000
53915     53915     gansu          106.6900       35.5600           98       147     2012      11        10        315              0.150870       2.915131       0.000000       0.270094       0.106000   -9999.000000       0.064200       0.334000
53915     53915     gansu          106.6900       35.5600           98       147     2012      11        11        316              0.150000       1.072845       0.158536       0.224436       0.116000   -9999.000000       0.073800       0.374000
53915     53915     gansu          106.6900       35.5600           98       147     2012      11        12        317              0.150708       2.739166       0.000000       0.249445   -9999.000000   -9999.000000       0.071100   -9999.000000
53915     53915     gansu          106.6900       35.5600           98       147     2012      11        13        318              0.000000       4.517334       0.000000       0.268657   -9999.000000   -9999.000000   -9999.000000       0.437000
53915     53915     gansu          106.6900       35.5600           98       147     2012      11        14        319              0.149875       5.602325       1.245359       0.272372       0.102500   -9999.000000       0.075200   -9999.000000
53915     53915     gansu          106.6900       35.5600           98       147     2012      11        15        320              0.150542       4.260498       1.262300       0.275482       0.120000   -9999.000000       0.073400       0.284000
53915     53915     gansu          106.6900       35.5600           98       147     2012      11        16        321              0.150739       2.168243       0.257606       0.259385       0.115000   -9999.000000       0.065900       0.386000
53915     53915     gansu          106.6900       35.5600           98       147     2012      11        17        322              0.000000       4.308319       2.248060       0.269991       0.113000   -9999.000000       0.074200   -9999.000000
53915     53915     gansu          106.6900       35.5600           98       147     2012      11        18        323              0.149458       6.454773       0.000000       0.276581   -9999.000000   -9999.000000   -9999.000000       0.397000
53915     53915     gansu          106.6900       35.5600           98       147     2012      11        19        324              0.148500       4.204834       0.219116       0.267807       0.097000   -9999.000000       0.077900   -9999.000000
53915     53915     gansu          106.6900       35.5600           98       147     2012      11        20        325              0.148583       3.318787       0.000000       0.269289       0.102000   -9999.000000       0.055400       0.431000
53915     53915     gansu          106.6900       35.5600           98       147     2012      11        21        326              0.148333       4.066528       0.000000       0.272271       0.094500   -9999.000000       0.075600   -9999.000000
53915     53915     gansu          106.6900       35.5600           98       147     2012      11        22        327              0.146042       4.493011       0.000000       0.268688       0.104000   -9999.000000       0.060100   -9999.000000
53915     53915     gansu          106.6900       35.5600           98       147     2012      11        23        328              0.145250       0.119049       0.000000       0.213577   -9999.000000   -9999.000000       0.065400       0.309000
53915     53915     gansu          106.6900       35.5600           98       147     2012      11        24        329              0.144667       0.447327       0.255267       0.207308   -9999.000000   -9999.000000   -9999.000000   -9999.000000
53915     53915     gansu          106.6900       35.5600           98       147     2012      11        25        330              0.143667       0.337738       0.000000       0.208788       0.088000   -9999.000000       0.065300       0.193000
53915     53915     gansu          106.6900       35.5600           98       147     2012      11        26        331              0.141500      -1.166626       0.000000       0.180826       0.090000   -9999.000000   -9999.000000   -9999.000000
53915     53915     gansu          106.6900       35.5600           98       147     2012      11        27        332              0.141083       0.611938       0.000000       0.204043       0.095000   -9999.000000       0.049100       0.087000
53915     53915     gansu          106.6900       35.5600           98       147     2012      11        28        333              0.138042       0.056335       0.000000       0.203989   -9999.000000   -9999.000000       0.060300       0.305000
53915     53915     gansu          106.6900       35.5600           98       147     2012      11        29        334              0.134500      -0.884857       0.000000       0.183448   -9999.000000   -9999.000000   -9999.000000       0.290000
53915     53915     gansu          106.6900       35.5600           98       147     2012      11        30        335              0.135375      -0.415497       0.725904       0.188043       0.098000   -9999.000000   -9999.000000       0.200000
53915     53915     gansu          106.6900       35.5600           98       147     2012      12        01        336              0.141208      -0.309418       0.054325       0.187948       0.097000   -9999.000000       0.057800   -9999.000000
53915     53915     gansu          106.6900       35.5600           98       147     2012      12        02        337              0.139250       0.171112       0.000000       0.199677       0.089000   -9999.000000       0.065300       0.257000
53915     53915     gansu          106.6900       35.5600           98       147     2012      12        03        338              0.137750      -0.484924       0.000000       0.191619       0.098000   -9999.000000       0.049300       0.292000
53915     53915     gansu          106.6900       35.5600           98       147     2012      12        04        339              0.138708       0.190094       0.000000       0.196135   -9999.000000   -9999.000000       0.058100       0.145000
53915     53915     gansu          106.6900       35.5600           98       147     2012      12        05        340              0.137333      -0.027740       0.428238       0.199356   -9999.000000   -9999.000000   -9999.000000       0.187000
53915     53915     gansu          106.6900       35.5600           98       147     2012      12        06        341              0.138667       0.309418       0.000000       0.198081       0.091000   -9999.000000       0.057500   -9999.000000
53915     53915     gansu          106.6900       35.5600           98       147     2012      12        07        342              0.138292       0.867432       0.139938       0.213538       0.085000   -9999.000000       0.044900       0.170000
53915     53915     gansu          106.6900       35.5600           98       147     2012      12        08        343              0.134500       0.058167       0.188765       0.200414       0.102000   -9999.000000       0.064800       0.153000
53915     53915     gansu          106.6900       35.5600           98       147     2012      12        09        344              0.131000      -0.773499       0.071968       0.185767   -9999.000000   -9999.000000       0.052100       0.168000
53915     53915     gansu          106.6900       35.5600           98       147     2012      12        10        345              0.133042      -0.608368       0.000000       0.183718   -9999.000000   -9999.000000       0.059800       0.136000
53915     53915     gansu          106.6900       35.5600           98       147     2012      12        11        346              0.134292       0.717163       0.000000       0.205873       0.090000       0.055200   -9999.000000   -9999.000000
53915     53915     gansu          106.6900       35.5600           98       147     2012      12        12        347              0.130583       0.106049       0.117260       0.200793       0.087000   -9999.000000       0.065200       0.187000
53915     53915     gansu          106.6900       35.5600           98       147     2012      12        13        348              0.130529      -0.804504       0.948088       0.180123   -9999.000000   -9999.000000       0.069400   -9999.000000
53915     53915     gansu          106.6900       35.5600           98       147     2012      12        14        349              0.128174      -2.675964       0.092488       0.151591       0.094000   -9999.000000       0.049500       0.087000
53915     53915     gansu          106.6900       35.5600           98       147     2012      12        15        350              0.000000      -0.981354       0.000000       0.182978   -9999.000000   -9999.000000       0.061900       0.093000
53915     53915     gansu          106.6900       35.5600           98       147     2012      12        16        351              0.125273      -2.345673       0.000000       0.155645   -9999.000000   -9999.000000   -9999.000000   -9999.000000
53915     53915     gansu          106.6900       35.5600           98       147     2012      12        17        352              0.121167      -3.337097       0.159913       0.140217       0.096000   -9999.000000       0.067000       0.109000
53915     53915     gansu          106.6900       35.5600           98       147     2012      12        18        353              0.113292      -3.121124       0.000000       0.152248       0.082000   -9999.000000       0.045800   -9999.000000
53915     53915     gansu          106.6900       35.5600           98       147     2012      12        19        354              0.112750      -2.443054       0.000000       0.163127   -9999.000000   -9999.000000       0.065100       0.126000
53915     53915     gansu          106.6900       35.5600           98       147     2012      12        20        355              0.000000      -2.445923       0.274864       0.152904   -9999.000000   -9999.000000       0.050900   -9999.000000
53915     53915     gansu          106.6900       35.5600           98       147     2012      12        21        356              0.106174      -4.595032       0.118761       0.135716   -9999.000000   -9999.000000       0.056000   -9999.000000
53915     53915     gansu          106.6900       35.5600           98       147     2012      12        22        357              0.096917      -4.709290       0.163023       0.140059   -9999.000000       0.036100   -9999.000000       0.101000
53915     53915     gansu          106.6900       35.5600           98       147     2012      12        23        358              0.093783      -8.569550       0.081665       0.124470       0.084000   -9999.000000       0.058300   -9999.000000
53915     53915     gansu          106.6900       35.5600           98       147     2012      12        24        359              0.093842      -5.240082       0.000000       0.131449       0.094000   -9999.000000       0.051100       0.083000
53915     53915     gansu          106.6900       35.5600           98       147     2012      12        25        360              0.094833      -3.131897       0.000000       0.160263   -9999.000000   -9999.000000       0.064600   -9999.000000
53915     53915     gansu          106.6900       35.5600           98       147     2012      12        26        361              0.000000      -3.882538       0.000000       0.147211   -9999.000000   -9999.000000       0.060700       0.013000
53915     53915     gansu          106.6900       35.5600           98       147     2012      12        27        362              0.092083      -4.852325       0.000000       0.140219       0.080000   -9999.000000       0.058800       0.170000
53915     53915     gansu          106.6900       35.5600           98       147     2012      12        28        363              0.000000      -4.548889       0.972538       0.140111   -9999.000000   -9999.000000   -9999.000000       0.061000
53915     53915     gansu          106.6900       35.5600           98       147     2012      12        29        364              0.000000      -7.703125       0.000000       0.126105   -9999.000000   -9999.000000       0.055400       0.049000
53915     53915     gansu          106.6900       35.5600           98       147     2012      12        30        365              0.000000      -9.411926       0.000000       0.121340   -9999.000000   -9999.000000       0.063100   -9999.000000
53915     53915     gansu          106.6900       35.5600           98       147     2012      12        31        366              0.091267      -5.574249       0.000000       0.135974   -9999.000000   -9999.000000       0.042600       0.011000
