# Supplementary material for: Research on Fusing Multisatellite Soil Moisture Data Based on Bayesian Model Averaging
Source: Hindawi journal article supplement (doi:10.1155/2018/9310838), 2018-06-25
Supplement: f1 [file 9310838.f1.zip › 2012_sm00-10cm_daily_ZDB_ZHY_53926_366days_allin.txt]

53926     53926     gansu          107.3500       35.3400           99       149     2012      01        01        001              0.000000   -9999.000000       2.968008   -9999.000000       0.082000   -9999.000000       0.054300   -9999.000000
53926     53926     gansu          107.3500       35.3400           99       149     2012      01        02        002              0.064417      -1.533447       0.000000       0.187732       0.081000       0.050500   -9999.000000   -9999.000000
53926     53926     gansu          107.3500       35.3400           99       149     2012      01        03        003              0.000000      -1.993988       0.000000       0.181991   -9999.000000   -9999.000000       0.062100   -9999.000000
53926     53926     gansu          107.3500       35.3400           99       149     2012      01        04        004              0.055625      -4.808289       0.000000       0.160341   -9999.000000   -9999.000000       0.068300       0.010000
53926     53926     gansu          107.3500       35.3400           99       149     2012      01        05        005              0.057292      -4.318604       0.000000       0.158822       0.077000       0.054800       0.059500   -9999.000000
53926     53926     gansu          107.3500       35.3400           99       149     2012      01        06        006              0.056455      -3.942413       0.000000       0.163989   -9999.000000   -9999.000000       0.066100       0.070000
53926     53926     gansu          107.3500       35.3400           99       149     2012      01        07        007              0.061609      -3.291138       0.000000       0.159759       0.093000       0.044600   -9999.000000   -9999.000000
53926     53926     gansu          107.3500       35.3400           99       149     2012      01        08        008              0.000000      -2.322693       0.000000       0.177311   -9999.000000   -9999.000000       0.067900   -9999.000000
53926     53926     gansu          107.3500       35.3400           99       149     2012      01        09        009              0.059875      -1.966095       0.000000       0.183520   -9999.000000       0.107600   -9999.000000       0.048000
53926     53926     gansu          107.3500       35.3400           99       149     2012      01        10        010              0.059667      -1.037689       0.000000       0.195108       0.075000   -9999.000000       0.058200   -9999.000000
53926     53926     gansu          107.3500       35.3400           99       149     2012      01        11        011              0.058174      -1.680237       0.000000       0.189505       0.075000   -9999.000000       0.052900       0.019000
53926     53926     gansu          107.3500       35.3400           99       149     2012      01        12        012              0.058833      -1.863464       0.000000       0.185430       0.087000       0.116400       0.056000   -9999.000000
53926     53926     gansu          107.3500       35.3400           99       149     2012      01        13        013              0.058542      -1.294861       0.000000       0.190997   -9999.000000   -9999.000000   -9999.000000   -9999.000000
53926     53926     gansu          107.3500       35.3400           99       149     2012      01        14        014              0.059208      -1.550049       0.000000       0.188717   -9999.000000       0.152900       0.057200       0.040000
53926     53926     gansu          107.3500       35.3400           99       149     2012      01        15        015              0.056217      -1.263153       0.044510       0.193155   -9999.000000       0.040900       0.055600   -9999.000000
53926     53926     gansu          107.3500       35.3400           99       149     2012      01        16        016              0.060208      -2.516998       0.000000       0.170680       0.078000   -9999.000000       0.055400       0.026000
53926     53926     gansu          107.3500       35.3400           99       149     2012      01        17        017              0.000000      -0.272247       0.000000       0.201562       0.074000   -9999.000000       0.052000   -9999.000000
53926     53926     gansu          107.3500       35.3400           99       149     2012      01        18        018              0.063000      -0.060394       0.000000       0.208052       0.084000   -9999.000000       0.051800   -9999.000000
53926     53926     gansu          107.3500       35.3400           99       149     2012      01        19        019              0.064333      -0.294159       0.000000       0.202643   -9999.000000   -9999.000000   -9999.000000       0.019000
53926     53926     gansu          107.3500       35.3400           99       149     2012      01        20        020              0.067625      -1.314880       0.491299       0.184554   -9999.000000   -9999.000000       0.050100       0.138000
53926     53926     gansu          107.3500       35.3400           99       149     2012      01        21        021              0.068375      -2.468079       0.000000       0.174110   -9999.000000   -9999.000000       0.053000       0.054000
53926     53926     gansu          107.3500       35.3400           99       149     2012      01        22        022              0.064348      -5.787201       0.684437       0.147290   -9999.000000   -9999.000000       0.046000   -9999.000000
53926     53926     gansu          107.3500       35.3400           99       149     2012      01        23        023              0.058348      -9.067535       6.165777       0.137845   -9999.000000   -9999.000000       0.039300   -9999.000000
53926     53926     gansu          107.3500       35.3400           99       149     2012      01        24        024              0.055708      -8.893677       0.284579       0.135389   -9999.000000   -9999.000000   -9999.000000       0.008000
53926     53926     gansu          107.3500       35.3400           99       149     2012      01        25        025              0.054000      -9.003693       0.369797       0.135850   -9999.000000   -9999.000000       0.039900       0.027000
53926     53926     gansu          107.3500       35.3400           99       149     2012      01        26        026              0.054167      -6.875641       0.236268       0.136763       0.082000   -9999.000000       0.031800       0.056000
53926     53926     gansu          107.3500       35.3400           99       149     2012      01        27        027              0.053792      -3.909485       0.000000       0.163930   -9999.000000   -9999.000000       0.039300   -9999.000000
53926     53926     gansu          107.3500       35.3400           99       149     2012      01        28        028              0.057167      -2.277588       0.000000       0.174594       0.093000   -9999.000000       0.041800       0.084000
53926     53926     gansu          107.3500       35.3400           99       149     2012      01        29        029              0.059417      -1.245544       0.000000       0.190790       0.092000   -9999.000000       0.044700       0.163000
53926     53926     gansu          107.3500       35.3400           99       149     2012      01        30        030              0.060000      -0.664276       0.000000       0.201123   -9999.000000       0.035200   -9999.000000       0.228000
53926     53926     gansu          107.3500       35.3400           99       149     2012      01        31        031              0.060500       0.201111       0.000000       0.212099       0.094000   -9999.000000       0.041400       0.185000
53926     53926     gansu          107.3500       35.3400           99       149     2012      02        01        032              0.063917       1.106567       0.000000       0.221236       0.089000       0.107800       0.040500   -9999.000000
53926     53926     gansu          107.3500       35.3400           99       149     2012      02        02        033              0.065000       0.201111       0.000000       0.211778   -9999.000000       0.081100       0.042800       0.124000
53926     53926     gansu          107.3500       35.3400           99       149     2012      02        03        034              0.062250      -1.295746       0.000000       0.195642       0.090000   -9999.000000       0.051800   -9999.000000
53926     53926     gansu          107.3500       35.3400           99       149     2012      02        04        035              0.066875       0.219147       0.541862       0.208310   -9999.000000   -9999.000000       0.054100       0.129000
53926     53926     gansu          107.3500       35.3400           99       149     2012      02        05        036              0.071125       1.077545       0.360922       0.220517   -9999.000000       0.047100   -9999.000000       0.176000
53926     53926     gansu          107.3500       35.3400           99       149     2012      02        06        037              0.072174       1.677979       0.000000       0.228232       0.087000   -9999.000000       0.046200   -9999.000000
53926     53926     gansu          107.3500       35.3400           99       149     2012      02        07        038              0.063083      -1.506012       0.000000       0.196969   -9999.000000       0.073400       0.048400       0.067000
53926     53926     gansu          107.3500       35.3400           99       149     2012      02        08        039              0.061208      -2.879974       0.000000       0.174369       0.087000   -9999.000000       0.046300   -9999.000000
53926     53926     gansu          107.3500       35.3400           99       149     2012      02        09        040              0.061000      -3.348053       0.177086       0.166208   -9999.000000   -9999.000000       0.044800       0.065000
53926     53926     gansu          107.3500       35.3400           99       149     2012      02        10        041              0.060583      -4.296204       0.454521       0.157122   -9999.000000       0.096300   -9999.000000   -9999.000000
53926     53926     gansu          107.3500       35.3400           99       149     2012      02        11        042              0.059250      -2.572479       0.000000       0.181595       0.085000   -9999.000000       0.049300       0.029000
53926     53926     gansu          107.3500       35.3400           99       149     2012      02        12        043              0.066500      -1.403473       0.133482       0.183738   -9999.000000   -9999.000000   -9999.000000       0.151000
53926     53926     gansu          107.3500       35.3400           99       149     2012      02        13        044              0.068083      -0.371857       0.000000       0.202112       0.098000   -9999.000000       0.045400   -9999.000000
53926     53926     gansu          107.3500       35.3400           99       149     2012      02        14        045              0.069333       0.257690       0.000000       0.209371   -9999.000000   -9999.000000   -9999.000000       0.267000
53926     53926     gansu          107.3500       35.3400           99       149     2012      02        15        046              0.078583       2.068939       0.084594       0.229539   -9999.000000   -9999.000000       0.057600   -9999.000000
53926     53926     gansu          107.3500       35.3400           99       149     2012      02        16        047              0.078435       0.374725       0.000000       0.218579       0.088000   -9999.000000   -9999.000000       0.180000
53926     53926     gansu          107.3500       35.3400           99       149     2012      02        17        048              0.078292       0.359985       0.000000       0.208688   -9999.000000   -9999.000000       0.050300       0.115000
53926     53926     gansu          107.3500       35.3400           99       149     2012      02        18        049              0.073792      -1.085846       0.000000       0.193825       0.093000   -9999.000000       0.048800       0.199000
53926     53926     gansu          107.3500       35.3400           99       149     2012      02        19        050              0.072083      -0.382812       0.000000       0.201902       0.095000   -9999.000000       0.054300       0.116000
53926     53926     gansu          107.3500       35.3400           99       149     2012      02        20        051              0.075875       1.279175       0.000000       0.215556   -9999.000000       0.074500       0.060200   -9999.000000
53926     53926     gansu          107.3500       35.3400           99       149     2012      02        21        052              0.083250       1.707855       0.000000       0.221744   -9999.000000   -9999.000000   -9999.000000       0.204000
53926     53926     gansu          107.3500       35.3400           99       149     2012      02        22        053              0.094917       3.972534       0.128842       0.240951       0.072000   -9999.000000   -9999.000000       0.366000
53926     53926     gansu          107.3500       35.3400           99       149     2012      02        23        054              0.099375       2.894287       0.243684       0.242429       0.074000   -9999.000000       0.052200       0.324000
53926     53926     gansu          107.3500       35.3400           99       149     2012      02        24        055              0.102542       0.999176       0.000000       0.231372       0.079000   -9999.000000       0.056300       0.174000
53926     53926     gansu          107.3500       35.3400           99       149     2012      02        25        056              0.102292       0.754639       0.000000       0.219127   -9999.000000       0.061000       0.055300   -9999.000000
53926     53926     gansu          107.3500       35.3400           99       149     2012      02        26        057              0.106750      -1.355103       0.132308       0.189348   -9999.000000   -9999.000000       0.061400       0.119000
53926     53926     gansu          107.3500       35.3400           99       149     2012      02        27        058              0.115739       1.573090       0.000000       0.219419       0.076000   -9999.000000   -9999.000000       0.215000
53926     53926     gansu          107.3500       35.3400           99       149     2012      02        28        059              0.117348       1.529480       0.000000       0.219246   -9999.000000   -9999.000000   -9999.000000       0.183000
53926     53926     gansu          107.3500       35.3400           99       149     2012      02        29        060              0.000000   -9999.000000       0.000000   -9999.000000       0.085000   -9999.000000   -9999.000000   -9999.000000
53926     53926     gansu          107.3500       35.3400           99       149     2012      03        01        061              0.138696       0.264313       0.057306       0.214323   -9999.000000       0.026000       0.061900   -9999.000000
53926     53926     gansu          107.3500       35.3400           99       149     2012      03        02        062              0.144364       2.026703       1.628475       0.239567       0.084000   -9999.000000       0.060500       0.394000
53926     53926     gansu          107.3500       35.3400           99       149     2012      03        03        063              0.148458       0.816040       0.300048       0.230314       0.083000   -9999.000000       0.059300   -9999.000000
53926     53926     gansu          107.3500       35.3400           99       149     2012      03        04        064              0.148348       0.704681       0.284480       0.225242   -9999.000000   -9999.000000   -9999.000000       0.307000
53926     53926     gansu          107.3500       35.3400           99       149     2012      03        05        065              0.162043       0.089661       0.269729       0.210052       0.104000   -9999.000000       0.054800       0.307000
53926     53926     gansu          107.3500       35.3400           99       149     2012      03        06        066              0.168739       1.839722       0.000000       0.233848   -9999.000000   -9999.000000       0.057000   -9999.000000
53926     53926     gansu          107.3500       35.3400           99       149     2012      03        07        067              0.000000       2.045990       0.327144       0.234907       0.086000   -9999.000000       0.063900       0.359000
53926     53926     gansu          107.3500       35.3400           99       149     2012      03        08        068              0.170304       2.389404       0.925328       0.244829   -9999.000000   -9999.000000       0.060300   -9999.000000
53926     53926     gansu          107.3500       35.3400           99       149     2012      03        09        069              0.169636       1.812866       0.260122       0.246603       0.104000   -9999.000000   -9999.000000       0.404000
53926     53926     gansu          107.3500       35.3400           99       149     2012      03        10        070              0.158625       3.628845       0.000000       0.255007       0.112000   -9999.000000   -9999.000000   -9999.000000
53926     53926     gansu          107.3500       35.3400           99       149     2012      03        11        071              0.150417       6.044830       0.000000       0.265872       0.097000   -9999.000000       0.057200       0.660000
53926     53926     gansu          107.3500       35.3400           99       149     2012      03        12        072              0.142652       6.584412       0.168146       0.266700   -9999.000000   -9999.000000       0.056600       0.605000
53926     53926     gansu          107.3500       35.3400           99       149     2012      03        13        073              0.136583       5.945984       0.000000       0.265221   -9999.000000   -9999.000000       0.067800   -9999.000000
53926     53926     gansu          107.3500       35.3400           99       149     2012      03        14        074              0.131625       9.627106       0.000000       0.264814       0.096500       0.120400   -9999.000000       0.534000
53926     53926     gansu          107.3500       35.3400           99       149     2012      03        15        075              0.127739       8.766357       0.000000       0.264345       0.082000   -9999.000000   -9999.000000   -9999.000000
53926     53926     gansu          107.3500       35.3400           99       149     2012      03        16        076              0.125273       5.921112       0.000000       0.266923       0.090000   -9999.000000       0.063000       0.521000
53926     53926     gansu          107.3500       35.3400           99       149     2012      03        17        077              0.121000       9.478333       0.000000       0.262003   -9999.000000   -9999.000000       0.049600       0.584000
53926     53926     gansu          107.3500       35.3400           99       149     2012      03        18        078              0.116136      11.628693       0.513929       0.258009   -9999.000000   -9999.000000       0.073000       0.451000
53926     53926     gansu          107.3500       35.3400           99       149     2012      03        19        079              0.114542      12.271027       0.000000       0.254564       0.087000   -9999.000000       0.075600       0.527000
53926     53926     gansu          107.3500       35.3400           99       149     2012      03        20        080              0.113500       8.863953       0.170089       0.257022       0.089000   -9999.000000       0.077700   -9999.000000
53926     53926     gansu          107.3500       35.3400           99       149     2012      03        21        081              0.112696       7.952820       1.062201       0.258071       0.109000   -9999.000000   -9999.000000       0.625000
53926     53926     gansu          107.3500       35.3400           99       149     2012      03        22        082              0.112792       5.177246       0.200263       0.261201   -9999.000000   -9999.000000       0.059800       0.569000
53926     53926     gansu          107.3500       35.3400           99       149     2012      03        23        083              0.112083       4.092865       0.067241       0.257659   -9999.000000   -9999.000000       0.061300       0.362000
53926     53926     gansu          107.3500       35.3400           99       149     2012      03        24        084              0.109542       6.976471       0.220105       0.250564       0.084000   -9999.000000       0.059600       0.372000
53926     53926     gansu          107.3500       35.3400           99       149     2012      03        25        085              0.000000      10.092743       0.000000       0.249904       0.080000   -9999.000000       0.062100   -9999.000000
53926     53926     gansu          107.3500       35.3400           99       149     2012      03        26        086              0.102542      11.628845       0.670913       0.244155       0.085000   -9999.000000   -9999.000000       0.320000
53926     53926     gansu          107.3500       35.3400           99       149     2012      03        27        087              0.099458      12.822632       0.000000       0.242044       0.080000   -9999.000000   -9999.000000       0.395000
53926     53926     gansu          107.3500       35.3400           99       149     2012      03        28        088              0.103292      14.358551       0.735735       0.237726   -9999.000000   -9999.000000       0.081900       0.788000
53926     53926     gansu          107.3500       35.3400           99       149     2012      03        29        089              0.113542       9.137177       0.000000       0.250690       0.093000   -9999.000000       0.091400       0.620000
53926     53926     gansu          107.3500       35.3400           99       149     2012      03        30        090              0.109625      13.128693       0.455771       0.245212       0.081000   -9999.000000       0.068900   -9999.000000
53926     53926     gansu          107.3500       35.3400           99       149     2012      03        31        091              0.105167       8.741974       0.303237       0.241124       0.079000   -9999.000000       0.069500       0.448000
53926     53926     gansu          107.3500       35.3400           99       149     2012      04        01        092              0.101917      13.857117       0.023694       0.234136       0.091000   -9999.000000   -9999.000000   -9999.000000
53926     53926     gansu          107.3500       35.3400           99       149     2012      04        02        093              0.097917      13.619049       0.439879       0.233471   -9999.000000   -9999.000000       0.071000       0.133000
53926     53926     gansu          107.3500       35.3400           99       149     2012      04        03        094              0.094333      10.527435       0.000000       0.233047       0.085000   -9999.000000       0.061100       0.179000
53926     53926     gansu          107.3500       35.3400           99       149     2012      04        04        095              0.090583      13.135834       0.000000       0.228248       0.074000   -9999.000000       0.070600   -9999.000000
53926     53926     gansu          107.3500       35.3400           99       149     2012      04        05        096              0.087125      15.703674       0.000000       0.221136       0.074500   -9999.000000       0.062100       0.278000
53926     53926     gansu          107.3500       35.3400           99       149     2012      04        06        097              0.147542      13.720062       0.659087       0.218779       0.084000   -9999.000000       0.064800   -9999.000000
53926     53926     gansu          107.3500       35.3400           99       149     2012      04        07        098              0.182208      13.846832       0.000000       0.219629       0.081000   -9999.000000   -9999.000000       0.155000
53926     53926     gansu          107.3500       35.3400           99       149     2012      04        08        099              0.179292      15.944885       0.000000       0.213997       0.078000   -9999.000000       0.065600   -9999.000000
53926     53926     gansu          107.3500       35.3400           99       149     2012      04        09        100              0.179250      17.689056       9.105631       0.209589       0.106000   -9999.000000       0.105500       0.713000
53926     53926     gansu          107.3500       35.3400           99       149     2012      04        10        101              0.185542      12.243774       3.033508       0.283557       0.086500   -9999.000000       0.076200       0.472000
53926     53926     gansu          107.3500       35.3400           99       149     2012      04        11        102              0.186083      16.628143       1.480351       0.270657       0.096000   -9999.000000       0.083500   -9999.000000
53926     53926     gansu          107.3500       35.3400           99       149     2012      04        12        103              0.184500      11.260193       0.853963       0.269645   -9999.000000   -9999.000000   -9999.000000       0.160000
53926     53926     gansu          107.3500       35.3400           99       149     2012      04        13        104              0.181792       9.622528       0.000000       0.262227       0.090000   -9999.000000   -9999.000000   -9999.000000
53926     53926     gansu          107.3500       35.3400           99       149     2012      04        14        105              0.179000      14.221039       0.247002       0.250882       0.081000   -9999.000000       0.065800       0.135000
53926     53926     gansu          107.3500       35.3400           99       149     2012      04        15        106              0.176042      16.538147       0.000000       0.242536       0.078500   -9999.000000       0.074400       0.198000
53926     53926     gansu          107.3500       35.3400           99       149     2012      04        16        107              0.173208      18.172638       0.000000       0.233118       0.085000   -9999.000000       0.071100       0.145000
53926     53926     gansu          107.3500       35.3400           99       149     2012      04        17        108              0.172625      17.088318       1.357150       0.227735   -9999.000000   -9999.000000       0.093200       0.475000
53926     53926     gansu          107.3500       35.3400           99       149     2012      04        18        109              0.170458      13.216583       0.000000       0.244177       0.088000   -9999.000000   -9999.000000   -9999.000000
53926     53926     gansu          107.3500       35.3400           99       149     2012      04        19        110              0.168667      18.213348       4.399060       0.232155       0.093000   -9999.000000       0.081700       0.152000
53926     53926     gansu          107.3500       35.3400           99       149     2012      04        20        111              0.166667      13.307648       0.000000       0.265175       0.075500   -9999.000000       0.068300       0.146000
53926     53926     gansu          107.3500       35.3400           99       149     2012      04        21        112              0.163750      16.201691       1.398322       0.251906       0.074000   -9999.000000       0.079900       0.175000
53926     53926     gansu          107.3500       35.3400           99       149     2012      04        22        113              0.160958      19.251495       0.701172       0.236098       0.095000   -9999.000000   -9999.000000       0.138000
53926     53926     gansu          107.3500       35.3400           99       149     2012      04        23        114              0.160000      21.128296       8.464186       0.231394       0.151000   -9999.000000       0.094900   -9999.000000
53926     53926     gansu          107.3500       35.3400           99       149     2012      04        24        115              0.160000      17.725281       0.000000       0.276344       0.120000   -9999.000000   -9999.000000       0.284000
53926     53926     gansu          107.3500       35.3400           99       149     2012      04        25        116              0.000000      15.724792       0.000000       0.265532       0.098000   -9999.000000       0.093100       0.095000
53926     53926     gansu          107.3500       35.3400           99       149     2012      04        26        117              0.157875      16.586639       0.000000       0.248046       0.091000   -9999.000000       0.094900       0.181000
53926     53926     gansu          107.3500       35.3400           99       149     2012      04        27        118              0.156375      19.137817       0.000000       0.234123       0.099000   -9999.000000       0.079600       0.138000
53926     53926     gansu          107.3500       35.3400           99       149     2012      04        28        119              0.155042      20.861481      27.256620       0.222610   -9999.000000   -9999.000000       0.060800   -9999.000000
53926     53926     gansu          107.3500       35.3400           99       149     2012      04        29        120              0.153957      20.235687       0.000000       0.325367       0.109000   -9999.000000   -9999.000000       0.260000
53926     53926     gansu          107.3500       35.3400           99       149     2012      04        30        121              0.153875      20.948730       0.708472       0.306239       0.133500   -9999.000000       0.127300   -9999.000000
53926     53926     gansu          107.3500       35.3400           99       149     2012      05        01        122              0.156625      15.880920       2.662962       0.299376       0.150000   -9999.000000       0.104600       0.495000
53926     53926     gansu          107.3500       35.3400           99       149     2012      05        02        123              0.160125      17.271637       1.038377       0.302509       0.175000   -9999.000000       0.123400       0.783000
53926     53926     gansu          107.3500       35.3400           99       149     2012      05        03        124              0.163292      16.389984       0.537917       0.300501   -9999.000000   -9999.000000       0.110500   -9999.000000
53926     53926     gansu          107.3500       35.3400           99       149     2012      05        04        125              0.164333      16.779175       0.000000       0.296879       0.142000   -9999.000000       0.103800       0.494000
53926     53926     gansu          107.3500       35.3400           99       149     2012      05        05        126              0.161250      18.519592       0.000000       0.287843       0.125500   -9999.000000   -9999.000000   -9999.000000
53926     53926     gansu          107.3500       35.3400           99       149     2012      05        06        127              0.160792      21.592896      11.449847       0.275599       0.158000   -9999.000000       0.112900       0.364000
53926     53926     gansu          107.3500       35.3400           99       149     2012      05        07        128              0.168708      18.350220       5.663891       0.305066   -9999.000000   -9999.000000       0.104400   -9999.000000
53926     53926     gansu          107.3500       35.3400           99       149     2012      05        08        129              0.170417      20.833740       0.000000       0.324191       0.117000   -9999.000000       0.103500       0.790000
53926     53926     gansu          107.3500       35.3400           99       149     2012      05        09        130              0.168167      23.013031       0.545752       0.302953   -9999.000000   -9999.000000       0.095000       0.447000
53926     53926     gansu          107.3500       35.3400           99       149     2012      05        10        131              0.164833      21.994965      17.649353       0.296006   -9999.000000   -9999.000000       0.087600   -9999.000000
53926     53926     gansu          107.3500       35.3400           99       149     2012      05        11        132              0.189708      21.128357       0.673786       0.317983       0.162000   -9999.000000   -9999.000000       0.565000
53926     53926     gansu          107.3500       35.3400           99       149     2012      05        12        133              0.188833      19.051575       0.000000       0.323469       0.129000   -9999.000000       0.095700   -9999.000000
53926     53926     gansu          107.3500       35.3400           99       149     2012      05        13        134              0.183500      15.633820       0.000000       0.307192       0.167000   -9999.000000       0.101000       0.428000
53926     53926     gansu          107.3500       35.3400           99       149     2012      05        14        135              0.177458      14.262878       0.000000       0.301182       0.152000   -9999.000000       0.109000       0.255000
53926     53926     gansu          107.3500       35.3400           99       149     2012      05        15        136              0.170750      17.855438       0.000000       0.290616       0.154000   -9999.000000       0.109000       0.207000
53926     53926     gansu          107.3500       35.3400           99       149     2012      05        16        137              0.165000      19.391327       0.051300       0.280997       0.133000   -9999.000000   -9999.000000       0.150000
53926     53926     gansu          107.3500       35.3400           99       149     2012      05        17        138              0.160304      20.276337       0.000000       0.272136       0.128500   -9999.000000       0.119400   -9999.000000
53926     53926     gansu          107.3500       35.3400           99       149     2012      05        18        139              0.157250      21.462189       0.284887       0.266806       0.130000   -9999.000000       0.100700       0.223000
53926     53926     gansu          107.3500       35.3400           99       149     2012      05        19        140              0.154042      22.507263       0.123183       0.259602   -9999.000000   -9999.000000       0.115300       0.232000
53926     53926     gansu          107.3500       35.3400           99       149     2012      05        20        141              0.152292      24.410217       0.874761       0.251832   -9999.000000   -9999.000000       0.106100       0.184000
53926     53926     gansu          107.3500       35.3400           99       149     2012      05        21        142              0.152000      21.901459       7.844849       0.254466       0.210000   -9999.000000       0.157500       0.743000
53926     53926     gansu          107.3500       35.3400           99       149     2012      05        22        143              0.152000      16.814484       0.232349       0.305344       0.174000   -9999.000000   -9999.000000   -9999.000000
53926     53926     gansu          107.3500       35.3400           99       149     2012      05        23        144              0.152000      17.901459       0.037397       0.285105   -9999.000000   -9999.000000       0.150400       0.506000
53926     53926     gansu          107.3500       35.3400           99       149     2012      05        24        145              0.151792      15.849762       0.131629       0.279343   -9999.000000   -9999.000000       0.144900       0.185000
53926     53926     gansu          107.3500       35.3400           99       149     2012      05        25        146              0.000000      16.937286       0.440897       0.274090       0.172000   -9999.000000       0.149300       0.288000
53926     53926     gansu          107.3500       35.3400           99       149     2012      05        26        147              0.149292      18.761810       0.139882       0.268660       0.146000   -9999.000000       0.134900       0.227000
53926     53926     gansu          107.3500       35.3400           99       149     2012      05        27        148              0.148125      22.223663       0.000000       0.257425       0.149000   -9999.000000       0.130800   -9999.000000
53926     53926     gansu          107.3500       35.3400           99       149     2012      05        28        149              0.164875      24.191071      30.269957       0.246128   -9999.000000   -9999.000000   -9999.000000       0.943000
53926     53926     gansu          107.3500       35.3400           99       149     2012      05        29        150              0.200708      16.538208       1.185000       0.345282       0.163000   -9999.000000       0.148400   -9999.000000
53926     53926     gansu          107.3500       35.3400           99       149     2012      05        30        151              0.186833      20.341675       0.000000       0.318920       0.167000   -9999.000000       0.149600   -9999.000000
53926     53926     gansu          107.3500       35.3400           99       149     2012      05        31        152              0.177417      21.613434       0.073529       0.301279       0.164000   -9999.000000       0.133100   -9999.000000
53926     53926     gansu          107.3500       35.3400           99       149     2012      06        01        153              0.169250      19.657623       0.000000       0.295319       0.140500   -9999.000000       0.132600   -9999.000000
53926     53926     gansu          107.3500       35.3400           99       149     2012      06        02        154              0.161625      22.538879       0.000000       0.283800       0.134500   -9999.000000   -9999.000000       0.354000
53926     53926     gansu          107.3500       35.3400           99       149     2012      06        03        155              0.155667      22.945496       3.090797       0.275831       0.146000   -9999.000000   -9999.000000   -9999.000000
53926     53926     gansu          107.3500       35.3400           99       149     2012      06        04        156              0.151333      22.219788       0.783757       0.282570       0.145000   -9999.000000       0.159400       0.429000
53926     53926     gansu          107.3500       35.3400           99       149     2012      06        05        157              0.149250      22.579193       4.077192       0.282198       0.166000   -9999.000000       0.204700   -9999.000000
53926     53926     gansu          107.3500       35.3400           99       149     2012      06        06        158              0.146875      18.916809       0.000000       0.298638       0.135000   -9999.000000       0.167500       0.538000
53926     53926     gansu          107.3500       35.3400           99       149     2012      06        07        159              0.144542      21.507172       0.000000       0.282867       0.133500   -9999.000000       0.168100       0.369000
53926     53926     gansu          107.3500       35.3400           99       149     2012      06        08        160              0.142792      23.166016       0.559766       0.269908       0.153000   -9999.000000   -9999.000000   -9999.000000
53926     53926     gansu          107.3500       35.3400           99       149     2012      06        09        161              0.141333      21.059418       0.000000       0.265709   -9999.000000   -9999.000000       0.168100       0.382000
53926     53926     gansu          107.3500       35.3400           99       149     2012      06        10        162              0.139958      24.796082       0.000000       0.253592       0.135000   -9999.000000       0.176200   -9999.000000
53926     53926     gansu          107.3500       35.3400           99       149     2012      06        11        163              0.000000      24.232880       0.511541       0.242618       0.121500   -9999.000000       0.171300       0.334000
53926     53926     gansu          107.3500       35.3400           99       149     2012      06        12        164              0.136750      23.078705       0.000000       0.235755       0.125500   -9999.000000       0.177400       0.416000
53926     53926     gansu          107.3500       35.3400           99       149     2012      06        13        165              0.136000      25.759766       0.044655       0.224397       0.129000   -9999.000000   -9999.000000       0.430000
53926     53926     gansu          107.3500       35.3400           99       149     2012      06        14        166              0.134917      26.370575       0.000000       0.214378       0.126000   -9999.000000   -9999.000000       0.322000
53926     53926     gansu          107.3500       35.3400           99       149     2012      06        15        167              0.133708      23.909668       0.000000       0.208020       0.128000   -9999.000000       0.168400   -9999.000000
53926     53926     gansu          107.3500       35.3400           99       149     2012      06        16        168              0.133042      24.737213       0.000000       0.203122       0.125000   -9999.000000       0.188800       0.388000
53926     53926     gansu          107.3500       35.3400           99       149     2012      06        17        169              0.132792      26.072418       0.000000       0.197705       0.125000   -9999.000000       0.172200       0.419000
53926     53926     gansu          107.3500       35.3400           99       149     2012      06        18        170              0.132333      26.151459       5.066478       0.194113       0.117000   -9999.000000       0.151300       0.474000
53926     53926     gansu          107.3500       35.3400           99       149     2012      06        19        171              0.132000      24.261383       0.000000       0.227311       0.126000   -9999.000000   -9999.000000       0.304000
53926     53926     gansu          107.3500       35.3400           99       149     2012      06        20        172              0.132125      25.093048       0.000000       0.232781       0.134000   -9999.000000       0.178400   -9999.000000
53926     53926     gansu          107.3500       35.3400           99       149     2012      06        21        173              0.132167      26.611023       0.000000       0.215788       0.126000   -9999.000000       0.148400       0.380000
53926     53926     gansu          107.3500       35.3400           99       149     2012      06        22        174              0.132083      27.284698       0.000000       0.202844       0.119500   -9999.000000       0.171000       0.469000
53926     53926     gansu          107.3500       35.3400           99       149     2012      06        23        175              0.132208      28.615601       2.245811       0.192471       0.122000   -9999.000000       0.160100       0.473000
53926     53926     gansu          107.3500       35.3400           99       149     2012      06        24        176              0.131208      28.655945       0.730495       0.200808   -9999.000000   -9999.000000       0.184000       0.435000
53926     53926     gansu          107.3500       35.3400           99       149     2012      06        25        177              0.130375      23.595825       4.327548       0.223202       0.138000   -9999.000000   -9999.000000   -9999.000000
53926     53926     gansu          107.3500       35.3400           99       149     2012      06        26        178              0.131250      23.791351       3.204615       0.253009   -9999.000000   -9999.000000       0.167500       0.765000
53926     53926     gansu          107.3500       35.3400           99       149     2012      06        27        179              0.130208      23.320984       3.374871       0.255503       0.162000   -9999.000000       0.176300   -9999.000000
53926     53926     gansu          107.3500       35.3400           99       149     2012      06        28        180              0.130292      21.868530      18.167278       0.272624       0.172000   -9999.000000       0.167400       0.933000
53926     53926     gansu          107.3500       35.3400           99       149     2012      06        29        181              0.136708      21.066559       3.011834       0.307843       0.186000   -9999.000000       0.177400   -9999.000000
53926     53926     gansu          107.3500       35.3400           99       149     2012      06        30        182              0.150708      22.309052       0.000000       0.322838   -9999.000000   -9999.000000   -9999.000000   -9999.000000
53926     53926     gansu          107.3500       35.3400           99       149     2012      07        01        183              0.157708      25.229034       1.278656       0.291911   -9999.000000   -9999.000000   -9999.000000       0.594000
53926     53926     gansu          107.3500       35.3400           99       149     2012      07        02        184              0.161625      26.524200       1.179281       0.278365       0.118000   -9999.000000       0.160800   -9999.000000
53926     53926     gansu          107.3500       35.3400           99       149     2012      07        03        185              0.164292      25.710724       0.000000       0.272868       0.120500   -9999.000000       0.173700       0.390000
53926     53926     gansu          107.3500       35.3400           99       149     2012      07        04        186              0.163833      26.911102       2.635664       0.258469       0.133000   -9999.000000       0.157900   -9999.000000
53926     53926     gansu          107.3500       35.3400           99       149     2012      07        05        187              0.164833      25.337646       0.000000       0.263731       0.116000   -9999.000000       0.164500       0.476000
53926     53926     gansu          107.3500       35.3400           99       149     2012      07        06        188              0.162417      27.007294      14.450617       0.248452   -9999.000000   -9999.000000   -9999.000000       0.851000
53926     53926     gansu          107.3500       35.3400           99       149     2012      07        07        189              0.162792      24.970245       0.887810       0.285555   -9999.000000   -9999.000000       0.185500   -9999.000000
53926     53926     gansu          107.3500       35.3400           99       149     2012      07        08        190              0.189583      26.119476      20.324114       0.297906       0.156500   -9999.000000       0.191100       0.900000
53926     53926     gansu          107.3500       35.3400           99       149     2012      07        09        191              0.222875      22.201904       1.912986       0.345885       0.142000   -9999.000000       0.182900   -9999.000000
53926     53926     gansu          107.3500       35.3400           99       149     2012      07        10        192              0.214750      23.334900       0.000000       0.323553       0.131000       0.181100       0.169100       0.774000
53926     53926     gansu          107.3500       35.3400           99       149     2012      07        11        193              0.201833      27.404510       0.000000       0.301288       0.145000   -9999.000000       0.156400       0.636000
53926     53926     gansu          107.3500       35.3400           99       149     2012      07        12        194              0.198042      24.824036       0.370859       0.292998       0.134000   -9999.000000   -9999.000000       0.603000
53926     53926     gansu          107.3500       35.3400           99       149     2012      07        13        195              0.193583      26.673462       0.000000       0.281565       0.119500       0.038900       0.150900       0.413000
53926     53926     gansu          107.3500       35.3400           99       149     2012      07        14        196              0.191292      26.047913       0.950289       0.271064       0.127000   -9999.000000       0.154700   -9999.000000
53926     53926     gansu          107.3500       35.3400           99       149     2012      07        15        197              0.187792      27.187683       0.897694       0.262415       0.140000       0.201800       0.148100       0.486000
53926     53926     gansu          107.3500       35.3400           99       149     2012      07        16        198              0.184542      27.104553       0.385190       0.262762   -9999.000000   -9999.000000       0.142600       0.531000
53926     53926     gansu          107.3500       35.3400           99       149     2012      07        17        199              0.180625      25.942535       3.173656       0.262380       0.124000   -9999.000000   -9999.000000       0.544000
53926     53926     gansu          107.3500       35.3400           99       149     2012      07        18        200              0.179375      23.928253       0.000000       0.260566       0.123000       0.075600       0.146600       0.358000
53926     53926     gansu          107.3500       35.3400           99       149     2012      07        19        201              0.175833      25.148529       0.264142       0.253463       0.125500   -9999.000000       0.129200   -9999.000000
53926     53926     gansu          107.3500       35.3400           99       149     2012      07        20        202              0.173542      24.553711       3.758822       0.254487       0.144000   -9999.000000       0.159400       0.717000
53926     53926     gansu          107.3500       35.3400           99       149     2012      07        21        203              0.182455      24.556122      18.569466       0.269629   -9999.000000       0.266400       0.133500       0.923000
53926     53926     gansu          107.3500       35.3400           99       149     2012      07        22        204              0.200125      21.819214       0.754503       0.341133       0.161000       0.134200       0.161100       0.925000
53926     53926     gansu          107.3500       35.3400           99       149     2012      07        23        205              0.193500      25.502258       0.233344       0.302231       0.148000       0.177700   -9999.000000       0.552000
53926     53926     gansu          107.3500       35.3400           99       149     2012      07        24        206              0.193417      22.752228       2.582674       0.292449       0.156500   -9999.000000       0.167000   -9999.000000
53926     53926     gansu          107.3500       35.3400           99       149     2012      07        25        207              0.196292      23.101440       0.000000       0.301172       0.153500   -9999.000000       0.156300       0.617000
53926     53926     gansu          107.3500       35.3400           99       149     2012      07        26        208              0.193958      26.412994       0.563109       0.287640       0.153000       0.174700       0.162300   -9999.000000
53926     53926     gansu          107.3500       35.3400           99       149     2012      07        27        209              0.190958      27.075623       0.240364       0.281079   -9999.000000   -9999.000000       0.152700       0.512000
53926     53926     gansu          107.3500       35.3400           99       149     2012      07        28        210              0.189792      27.750122       1.282872       0.271743       0.146000       0.099500       0.141400       0.447000
53926     53926     gansu          107.3500       35.3400           99       149     2012      07        29        211              0.186708      28.717346       0.000000       0.263114       0.126500   -9999.000000   -9999.000000   -9999.000000
53926     53926     gansu          107.3500       35.3400           99       149     2012      07        30        212              0.179458      29.633881       1.614817       0.249913       0.156000       0.067500       0.101400       0.617000
53926     53926     gansu          107.3500       35.3400           99       149     2012      07        31        213              0.175083      24.238190       4.972217       0.259090   -9999.000000       0.058400       0.112900   -9999.000000
53926     53926     gansu          107.3500       35.3400           99       149     2012      08        01        214              0.173792      22.366730       1.449110       0.279370   -9999.000000   -9999.000000       0.103800       0.705000
53926     53926     gansu          107.3500       35.3400           99       149     2012      08        02        215              0.174667      22.184387       0.000000       0.285041       0.137000   -9999.000000       0.099400   -9999.000000
53926     53926     gansu          107.3500       35.3400           99       149     2012      08        03        216              0.171958      26.086243       1.236486       0.268093       0.133000   -9999.000000   -9999.000000       0.442000
53926     53926     gansu          107.3500       35.3400           99       149     2012      08        04        217              0.167292      27.104919       0.360318       0.257855       0.128000       0.016000       0.107500       0.748000
53926     53926     gansu          107.3500       35.3400           99       149     2012      08        05        218              0.162708      26.128448       3.963843       0.254249       0.127500       0.136000       0.098900   -9999.000000
53926     53926     gansu          107.3500       35.3400           99       149     2012      08        06        219              0.158250      26.366425       0.612178       0.264637       0.148000   -9999.000000       0.127500       0.636000
53926     53926     gansu          107.3500       35.3400           99       149     2012      08        07        220              0.154375      25.858978       0.153799       0.267713       0.134000   -9999.000000       0.111300   -9999.000000
53926     53926     gansu          107.3500       35.3400           99       149     2012      08        08        221              0.149792      27.904785       8.561478       0.252325       0.145000       0.089800       0.088400       0.454000
53926     53926     gansu          107.3500       35.3400           99       149     2012      08        09        222              0.146083      26.924377       0.555909       0.283423       0.130000       0.195900   -9999.000000       0.696000
53926     53926     gansu          107.3500       35.3400           99       149     2012      08        10        223              0.142542      27.478516       0.000000       0.270138       0.133500       0.104100       0.122000       0.579000
53926     53926     gansu          107.3500       35.3400           99       149     2012      08        11        224              0.140917      25.667542       1.991882       0.260527       0.167000   -9999.000000       0.124900       0.630000
53926     53926     gansu          107.3500       35.3400           99       149     2012      08        12        225              0.138958      27.167511       0.878449       0.251686   -9999.000000   -9999.000000       0.112400   -9999.000000
53926     53926     gansu          107.3500       35.3400           99       149     2012      08        13        226              0.136217      26.305481       4.319157       0.245866       0.199000       0.178900       0.145600       0.509000
53926     53926     gansu          107.3500       35.3400           99       149     2012      08        14        227              0.137208      23.647064       7.414127       0.261509       0.174000   -9999.000000   -9999.000000       0.923000
53926     53926     gansu          107.3500       35.3400           99       149     2012      08        15        228              0.140292      23.981018       0.442034       0.305633       0.158000       0.094700   -9999.000000       0.714000
53926     53926     gansu          107.3500       35.3400           99       149     2012      08        16        229              0.140708      25.801636       0.507611       0.277287       0.156000   -9999.000000       0.141000       0.700000
53926     53926     gansu          107.3500       35.3400           99       149     2012      08        17        230              0.193348      24.020660      27.229919       0.272446   -9999.000000   -9999.000000       0.162100   -9999.000000
53926     53926     gansu          107.3500       35.3400           99       149     2012      08        18        231              0.247522      21.380951      13.495913       0.349187       0.206000       0.155000       0.153200       1.000000
53926     53926     gansu          107.3500       35.3400           99       149     2012      08        19        232              0.238000      19.397614       0.101265       0.352158       0.208000   -9999.000000       0.163100       0.970000
53926     53926     gansu          107.3500       35.3400           99       149     2012      08        20        233              0.223042      21.156464       6.429825       0.327891       0.171500       0.136900   -9999.000000       0.977000
53926     53926     gansu          107.3500       35.3400           99       149     2012      08        21        234              0.208292      23.272064       2.927449       0.329867       0.146000   -9999.000000       0.138700   -9999.000000
53926     53926     gansu          107.3500       35.3400           99       149     2012      08        22        235              0.195167      21.519836       0.000000       0.318911       0.148000       0.063400       0.115500   -9999.000000
53926     53926     gansu          107.3500       35.3400           99       149     2012      08        23        236              0.183500      22.443726       0.000000       0.306800   -9999.000000       0.189600       0.128500       0.624000
53926     53926     gansu          107.3500       35.3400           99       149     2012      08        24        237              0.174667      22.231110       0.000000       0.299695   -9999.000000   -9999.000000       0.111000   -9999.000000
53926     53926     gansu          107.3500       35.3400           99       149     2012      08        25        238              0.000000      23.017090       7.013520       0.292635       0.147500   -9999.000000       0.094000       0.851000
53926     53926     gansu          107.3500       35.3400           99       149     2012      08        26        239              0.192625      22.813141       0.000000       0.311404       0.145500   -9999.000000   -9999.000000       0.629000
53926     53926     gansu          107.3500       35.3400           99       149     2012      08        27        240              0.186375      23.490021       2.165358       0.304248       0.159000       0.076500       0.140600   -9999.000000
53926     53926     gansu          107.3500       35.3400           99       149     2012      08        28        241              0.177667      22.504791       0.118498       0.303794       0.136000       0.247200       0.135600       0.629000
53926     53926     gansu          107.3500       35.3400           99       149     2012      08        29        242              0.168167      23.402924       0.000000       0.291111       0.148000   -9999.000000       0.114100   -9999.000000
53926     53926     gansu          107.3500       35.3400           99       149     2012      08        30        243              0.161167      24.274445       9.591291       0.281474   -9999.000000   -9999.000000       0.123700       0.578000
53926     53926     gansu          107.3500       35.3400           99       149     2012      08        31        244              0.175727      24.405640      26.285898       0.294327       0.198500       0.196600   -9999.000000   -9999.000000
53926     53926     gansu          107.3500       35.3400           99       149     2012      09        01        245              0.263125      19.844421       9.045785       0.349463       0.165000   -9999.000000   -9999.000000       1.000000
53926     53926     gansu          107.3500       35.3400           99       149     2012      09        02        246              0.241375      16.535187       0.000000       0.358638       0.139000   -9999.000000       0.139800       0.884000
53926     53926     gansu          107.3500       35.3400           99       149     2012      09        03        247              0.225167      19.509857       0.285678       0.331884       0.128000   -9999.000000       0.111100   -9999.000000
53926     53926     gansu          107.3500       35.3400           99       149     2012      09        04        248              0.213833      20.632019       1.545037       0.320802       0.143000   -9999.000000       0.099100       0.716000
53926     53926     gansu          107.3500       35.3400           99       149     2012      09        05        249              0.205667      20.169403       0.000000       0.315829       0.135500       0.145600       0.098300   -9999.000000
53926     53926     gansu          107.3500       35.3400           99       149     2012      09        06        250              0.198583      22.464600       0.311394       0.309793       0.121000   -9999.000000   -9999.000000       0.660000
53926     53926     gansu          107.3500       35.3400           99       149     2012      09        07        251              0.196625      23.088196      10.010995       0.305455       0.164000       0.144400       0.111000       1.000000
53926     53926     gansu          107.3500       35.3400           99       149     2012      09        08        252              0.200833      20.490784       0.579480       0.328582       0.147000   -9999.000000       0.104900       0.918000
53926     53926     gansu          107.3500       35.3400           99       149     2012      09        09        253              0.200542      20.976654       2.037120       0.321110       0.161000       0.175600       0.117100       0.935000
53926     53926     gansu          107.3500       35.3400           99       149     2012      09        10        254              0.261292      19.522736      21.987381       0.318918       0.173500       0.176700       0.147400   -9999.000000
53926     53926     gansu          107.3500       35.3400           99       149     2012      09        11        255              0.252958      17.899445       0.000000       0.360438       0.159500   -9999.000000       0.142600       0.950000
53926     53926     gansu          107.3500       35.3400           99       149     2012      09        12        256              0.236833      18.532715       0.000000       0.332877       0.147000   -9999.000000   -9999.000000       0.826000
53926     53926     gansu          107.3500       35.3400           99       149     2012      09        13        257              0.227542      14.850220       0.000000       0.324007       0.148000   -9999.000000       0.131000       0.747000
53926     53926     gansu          107.3500       35.3400           99       149     2012      09        14        258              0.221167      16.297211       0.000000       0.316396       0.162000       0.076800       0.131700       0.559000
53926     53926     gansu          107.3500       35.3400           99       149     2012      09        15        259              0.214917      17.679932       5.465553       0.310354       0.183000       0.184200       0.132500   -9999.000000
53926     53926     gansu          107.3500       35.3400           99       149     2012      09        16        260              0.216958      15.275909       0.735504       0.325201       0.177000   -9999.000000       0.142200       0.925000
53926     53926     gansu          107.3500       35.3400           99       149     2012      09        17        261              0.218625      14.471619       1.988820       0.321690       0.153000   -9999.000000   -9999.000000       0.772000
53926     53926     gansu          107.3500       35.3400           99       149     2012      09        18        262              0.215042      17.899353       0.000000       0.319219       0.159000       0.202300   -9999.000000       0.758000
53926     53926     gansu          107.3500       35.3400           99       149     2012      09        19        263              0.211208      18.558105       1.344687       0.311213   -9999.000000   -9999.000000       0.111200       0.525000
53926     53926     gansu          107.3500       35.3400           99       149     2012      09        20        264              0.228750      19.438965      17.678900       0.307941       0.191000       0.104200       0.149800   -9999.000000
53926     53926     gansu          107.3500       35.3400           99       149     2012      09        21        265              0.245708      15.845490       0.000000       0.347939   -9999.000000   -9999.000000       0.132300       0.869000
53926     53926     gansu          107.3500       35.3400           99       149     2012      09        22        266              0.233958      18.578461       0.000000       0.329013       0.130000       0.121700       0.134300   -9999.000000
53926     53926     gansu          107.3500       35.3400           99       149     2012      09        23        267              0.226333      18.783905       0.552458       0.321047       0.135000       0.122100   -9999.000000       0.737000
53926     53926     gansu          107.3500       35.3400           99       149     2012      09        24        268              0.236083      18.618927      23.377083       0.317095       0.164000   -9999.000000       0.128000       0.986000
53926     53926     gansu          107.3500       35.3400           99       149     2012      09        25        269              0.275609      15.558472       5.606018       0.352869       0.163000       0.205600       0.123100   -9999.000000
53926     53926     gansu          107.3500       35.3400           99       149     2012      09        26        270              0.257875      13.938721       0.000000       0.356317       0.164000   -9999.000000       0.129800       0.897000
53926     53926     gansu          107.3500       35.3400           99       149     2012      09        27        271              0.248786      17.852600       0.000000       0.336693       0.139500       0.264700       0.117300   -9999.000000
53926     53926     gansu          107.3500       35.3400           99       149     2012      09        28        272              0.233000      15.621735       0.506255       0.327248       0.139500   -9999.000000       0.115300       0.637000
53926     53926     gansu          107.3500       35.3400           99       149     2012      09        29        273              0.228125      13.901367       0.000000       0.321682       0.143000   -9999.000000   -9999.000000   -9999.000000
53926     53926     gansu          107.3500       35.3400           99       149     2012      09        30        274              0.225042      15.169983       0.000000       0.318199   -9999.000000   -9999.000000       0.110000       0.616000
53926     53926     gansu          107.3500       35.3400           99       149     2012      10        01        275              0.221750      16.695740       0.000000       0.314117       0.133000   -9999.000000       0.109600       0.714000
53926     53926     gansu          107.3500       35.3400           99       149     2012      10        02        276              0.217458      17.430237       2.175972       0.310445       0.136000       0.080100       0.102700   -9999.000000
53926     53926     gansu          107.3500       35.3400           99       149     2012      10        03        277              0.218125      14.748657       0.435624       0.317218       0.127500       0.114600       0.107500       0.663000
53926     53926     gansu          107.3500       35.3400           99       149     2012      10        04        278              0.216333      16.956177       0.413777       0.311185       0.144000   -9999.000000   -9999.000000   -9999.000000
53926     53926     gansu          107.3500       35.3400           99       149     2012      10        05        279              0.214583      13.828644       0.000000       0.310156       0.129000   -9999.000000       0.114800       0.575000
53926     53926     gansu          107.3500       35.3400           99       149     2012      10        06        280              0.211875      15.239594       0.331873       0.306326       0.136000       0.131100       0.099200       0.659000
53926     53926     gansu          107.3500       35.3400           99       149     2012      10        07        281              0.211375      13.637146       0.000000       0.306457       0.134500   -9999.000000       0.112300       0.594000
53926     53926     gansu          107.3500       35.3400           99       149     2012      10        08        282              0.210125      14.581024       0.330893       0.305699       0.129500       0.219000       0.086600       0.630000
53926     53926     gansu          107.3500       35.3400           99       149     2012      10        09        283              0.209875      13.020874       0.000000       0.305522       0.110000   -9999.000000       0.083600   -9999.000000
53926     53926     gansu          107.3500       35.3400           99       149     2012      10        10        284              0.209875      14.293610       0.000000       0.300604       0.130000   -9999.000000   -9999.000000       0.481000
53926     53926     gansu          107.3500       35.3400           99       149     2012      10        11        285              0.209875      15.200226       0.000000       0.297885       0.113000       0.255800       0.082400       0.599000
53926     53926     gansu          107.3500       35.3400           99       149     2012      10        12        286              0.209000      16.035675       0.000000       0.296065       0.111000   -9999.000000       0.085500       0.595000
53926     53926     gansu          107.3500       35.3400           99       149     2012      10        13        287              0.208292      14.711334       0.000000       0.294128       0.100500       0.151200       0.076500       0.489000
53926     53926     gansu          107.3500       35.3400           99       149     2012      10        14        288              0.206500      15.478607       0.000000       0.290817       0.105500   -9999.000000       0.086300   -9999.000000
53926     53926     gansu          107.3500       35.3400           99       149     2012      10        15        289              0.205000      13.819946       0.586934       0.292883       0.129000   -9999.000000       0.112700       0.568000
53926     53926     gansu          107.3500       35.3400           99       149     2012      10        16        290              0.203917      11.688263       0.000000       0.296388   -9999.000000       0.191300   -9999.000000       0.474000
53926     53926     gansu          107.3500       35.3400           99       149     2012      10        17        291              0.202750      10.275543       0.000000       0.291448       0.110000   -9999.000000       0.101300       0.489000
53926     53926     gansu          107.3500       35.3400           99       149     2012      10        18        292              0.201875      11.803375       7.943948       0.288507       0.135000   -9999.000000       0.123900       0.783000
53926     53926     gansu          107.3500       35.3400           99       149     2012      10        19        293              0.207958       8.372498       0.134551       0.322634       0.116000   -9999.000000       0.113700   -9999.000000
53926     53926     gansu          107.3500       35.3400           99       149     2012      10        20        294              0.208875      12.070709       0.000000       0.307483       0.120000   -9999.000000       0.118300       0.691000
53926     53926     gansu          107.3500       35.3400           99       149     2012      10        21        295              0.205333      13.651947       0.473475       0.303070       0.157000       0.107500   -9999.000000   -9999.000000
53926     53926     gansu          107.3500       35.3400           99       149     2012      10        22        296              0.203542       7.381653       0.044997       0.303312   -9999.000000   -9999.000000       0.123500       0.565000
53926     53926     gansu          107.3500       35.3400           99       149     2012      10        23        297              0.201583      10.144745       0.168374       0.298540   -9999.000000   -9999.000000       0.104500       0.451000
53926     53926     gansu          107.3500       35.3400           99       149     2012      10        24        298              0.201000       8.574677       0.000000       0.299368   -9999.000000       0.166100       0.122200   -9999.000000
53926     53926     gansu          107.3500       35.3400           99       149     2012      10        25        299              0.000000       9.856964       0.493299       0.295505       0.132000   -9999.000000       0.111700       0.532000
53926     53926     gansu          107.3500       35.3400           99       149     2012      10        26        300              0.200167      11.031982       0.000000       0.293894       0.140000   -9999.000000       0.113200   -9999.000000
53926     53926     gansu          107.3500       35.3400           99       149     2012      10        27        301              0.197667      12.011932       0.000000       0.291300   -9999.000000   -9999.000000   -9999.000000       0.455000
53926     53926     gansu          107.3500       35.3400           99       149     2012      10        28        302              0.000000      12.069427       1.025706       0.289218       0.134000   -9999.000000       0.112500   -9999.000000
53926     53926     gansu          107.3500       35.3400           99       149     2012      10        29        303              0.194208       9.772888       0.000000       0.290851       0.116000       0.082000       0.122500       0.380000
53926     53926     gansu          107.3500       35.3400           99       149     2012      10        30        304              0.193000      10.084778       0.000000       0.287846       0.116000   -9999.000000       0.107500       0.508000
53926     53926     gansu          107.3500       35.3400           99       149     2012      10        31        305              0.192792       8.983643       0.000000       0.285733       0.139000       0.174000       0.118000   -9999.000000
53926     53926     gansu          107.3500       35.3400           99       149     2012      11        01        306              0.192250       8.882843       0.000000       0.283957       0.124000   -9999.000000   -9999.000000       0.400000
53926     53926     gansu          107.3500       35.3400           99       149     2012      11        02        307              0.193917       9.437408       0.155354       0.283842   -9999.000000   -9999.000000   -9999.000000   -9999.000000
53926     53926     gansu          107.3500       35.3400           99       149     2012      11        03        308              0.189958       9.131287       0.000000       0.282149   -9999.000000       0.181200       0.103300       0.290000
53926     53926     gansu          107.3500       35.3400           99       149     2012      11        04        309              0.204208       3.626587       0.000000       0.262110       0.110000   -9999.000000       0.122000       0.402000
53926     53926     gansu          107.3500       35.3400           99       149     2012      11        05        310              0.195000       3.570312       0.000000       0.260290       0.112000       0.101500       0.107700   -9999.000000
53926     53926     gansu          107.3500       35.3400           99       149     2012      11        06        311              0.191167       4.736511       0.148268       0.271986       0.126000   -9999.000000       0.118900       0.365000
53926     53926     gansu          107.3500       35.3400           99       149     2012      11        07        312              0.189333       6.151855       1.021061       0.279856   -9999.000000   -9999.000000   -9999.000000   -9999.000000
53926     53926     gansu          107.3500       35.3400           99       149     2012      11        08        313              0.188125       4.644135       0.000000       0.279576       0.138000       0.091400       0.123100       0.327000
53926     53926     gansu          107.3500       35.3400           99       149     2012      11        09        314              0.187542       6.540802       0.249214       0.281384       0.143000   -9999.000000       0.112400       0.725000
53926     53926     gansu          107.3500       35.3400           99       149     2012      11        10        315              0.186333       4.389862       0.000000       0.284943       0.120000   -9999.000000       0.120000       0.523000
53926     53926     gansu          107.3500       35.3400           99       149     2012      11        11        316              0.185375       2.608582       0.052785       0.254323       0.133000   -9999.000000       0.121000       0.269000
53926     53926     gansu          107.3500       35.3400           99       149     2012      11        12        317              0.190333       3.330963       0.000000       0.262889   -9999.000000   -9999.000000       0.113400   -9999.000000
53926     53926     gansu          107.3500       35.3400           99       149     2012      11        13        318              0.000000       5.386841       0.000000       0.273721   -9999.000000       0.032200   -9999.000000       0.394000
53926     53926     gansu          107.3500       35.3400           99       149     2012      11        14        319              0.192833       6.099060       0.000000       0.277425       0.120000   -9999.000000       0.122900       0.433000
53926     53926     gansu          107.3500       35.3400           99       149     2012      11        15        320              0.191833       3.800964       0.000000       0.280731       0.131000   -9999.000000       0.118500       0.662000
53926     53926     gansu          107.3500       35.3400           99       149     2012      11        16        321              0.189783       3.004578       0.335378       0.277518       0.134000       0.025200       0.105800       0.366000
53926     53926     gansu          107.3500       35.3400           99       149     2012      11        17        322              0.000000       5.216034       0.000000       0.277434       0.130000   -9999.000000       0.116000   -9999.000000
53926     53926     gansu          107.3500       35.3400           99       149     2012      11        18        323              0.188833       6.501160       0.000000       0.279778   -9999.000000       0.095200   -9999.000000       0.342000
53926     53926     gansu          107.3500       35.3400           99       149     2012      11        19        324              0.187917       5.233093       0.000000       0.274877       0.124000   -9999.000000       0.111600   -9999.000000
53926     53926     gansu          107.3500       35.3400           99       149     2012      11        20        325              0.188250       4.232147       0.000000       0.278327       0.114000   -9999.000000       0.086500       0.322000
53926     53926     gansu          107.3500       35.3400           99       149     2012      11        21        326              0.187375       4.535339       0.000000       0.280050       0.109500       0.090000       0.107000   -9999.000000
53926     53926     gansu          107.3500       35.3400           99       149     2012      11        22        327              0.183875       5.377563       0.000000       0.279779       0.119000   -9999.000000       0.092400   -9999.000000
53926     53926     gansu          107.3500       35.3400           99       149     2012      11        23        328              0.181208       2.280853       0.000000       0.256856   -9999.000000       0.076400       0.097100       0.265000
53926     53926     gansu          107.3500       35.3400           99       149     2012      11        24        329              0.179500       2.151459       0.043243       0.242177   -9999.000000   -9999.000000   -9999.000000   -9999.000000
53926     53926     gansu          107.3500       35.3400           99       149     2012      11        25        330              0.179875       0.602570       0.000000       0.233453       0.103000   -9999.000000       0.095000       0.083000
53926     53926     gansu          107.3500       35.3400           99       149     2012      11        26        331              0.177792       0.357697       0.000000       0.221167       0.106000       0.034600   -9999.000000   -9999.000000
53926     53926     gansu          107.3500       35.3400           99       149     2012      11        27        332              0.179250       1.292419       0.000000       0.230143       0.124000   -9999.000000       0.098800       0.085000
53926     53926     gansu          107.3500       35.3400           99       149     2012      11        28        333              0.178667       1.480011       0.000000       0.230938       0.117000   -9999.000000       0.095600       0.186000
53926     53926     gansu          107.3500       35.3400           99       149     2012      11        29        334              0.172750      -0.004791       0.000000       0.213444   -9999.000000       0.049300       0.095600   -9999.000000
53926     53926     gansu          107.3500       35.3400           99       149     2012      11        30        335              0.165250      -0.820465       0.172384       0.198674   -9999.000000   -9999.000000   -9999.000000       0.202000
53926     53926     gansu          107.3500       35.3400           99       149     2012      12        01        336              0.177167       0.188629       0.000000       0.208728       0.108000       0.078100       0.093300   -9999.000000
53926     53926     gansu          107.3500       35.3400           99       149     2012      12        02        337              0.176375       1.079163       0.000000       0.227882       0.094000   -9999.000000       0.100100       0.134000
53926     53926     gansu          107.3500       35.3400           99       149     2012      12        03        338              0.176042       1.168274       0.000000       0.227485       0.114000   -9999.000000       0.079000       0.192000
53926     53926     gansu          107.3500       35.3400           99       149     2012      12        04        339              0.175000       1.026703       0.000000       0.225548   -9999.000000       0.038800       0.086600       0.184000
53926     53926     gansu          107.3500       35.3400           99       149     2012      12        05        340              0.175833       1.547729       0.000000       0.233925   -9999.000000   -9999.000000   -9999.000000       0.084000
53926     53926     gansu          107.3500       35.3400           99       149     2012      12        06        341              0.175708       1.423676       0.000000       0.231297       0.100000       0.075600       0.091300   -9999.000000
53926     53926     gansu          107.3500       35.3400           99       149     2012      12        07        342              0.177417       2.478760       0.000000       0.245917       0.098000   -9999.000000       0.066600       0.055000
53926     53926     gansu          107.3500       35.3400           99       149     2012      12        08        343              0.175375       1.717590       0.000000       0.232569       0.109000   -9999.000000       0.090400       0.136000
53926     53926     gansu          107.3500       35.3400           99       149     2012      12        09        344              0.169083       0.261108       0.000000       0.214697   -9999.000000       0.023600       0.079500       0.144000
53926     53926     gansu          107.3500       35.3400           99       149     2012      12        10        345              0.161833      -0.385162       0.000000       0.202921   -9999.000000   -9999.000000       0.088200       0.060000
53926     53926     gansu          107.3500       35.3400           99       149     2012      12        11        346              0.159083       1.104767       0.000000       0.222372       0.100000       0.100700   -9999.000000   -9999.000000
53926     53926     gansu          107.3500       35.3400           99       149     2012      12        12        347              0.158125       0.312836       0.000000       0.213829   -9999.000000   -9999.000000       0.092500       0.022000
53926     53926     gansu          107.3500       35.3400           99       149     2012      12        13        348              0.165913      -0.144012       0.000000       0.203961   -9999.000000   -9999.000000       0.095700       0.053000
53926     53926     gansu          107.3500       35.3400           99       149     2012      12        14        349              0.166625      -1.223602       0.000000       0.184019       0.108000       0.045000       0.079400       0.125000
53926     53926     gansu          107.3500       35.3400           99       149     2012      12        15        350              0.000000      -0.391418       0.000000       0.200746   -9999.000000   -9999.000000       0.091100       0.020000
53926     53926     gansu          107.3500       35.3400           99       149     2012      12        16        351              0.165750      -1.228333       0.000000       0.181913   -9999.000000   -9999.000000   -9999.000000   -9999.000000
53926     53926     gansu          107.3500       35.3400           99       149     2012      12        17        352              0.169458      -1.700775       0.000000       0.175120       0.097000       0.189100   -9999.000000       0.020000
53926     53926     gansu          107.3500       35.3400           99       149     2012      12        18        353              0.158833      -1.700409       0.000000       0.188175       0.091000       0.060400       0.070000   -9999.000000
53926     53926     gansu          107.3500       35.3400           99       149     2012      12        19        354              0.155417      -1.106445       0.000000       0.193723       0.111000       0.086100       0.087300       0.126000
53926     53926     gansu          107.3500       35.3400           99       149     2012      12        20        355              0.000000      -1.066376       0.240408       0.186438   -9999.000000   -9999.000000       0.073900       0.036000
53926     53926     gansu          107.3500       35.3400           99       149     2012      12        21        356              0.145833      -2.433563       0.000000       0.170408   -9999.000000   -9999.000000       0.078300   -9999.000000
53926     53926     gansu          107.3500       35.3400           99       149     2012      12        22        357              0.137667      -2.449280       0.000000       0.175271   -9999.000000       0.045700   -9999.000000       0.025000
53926     53926     gansu          107.3500       35.3400           99       149     2012      12        23        358              0.131042      -5.783295       0.000000       0.153275       0.085000   -9999.000000       0.077600   -9999.000000
53926     53926     gansu          107.3500       35.3400           99       149     2012      12        24        359              0.130158      -4.568115       0.000000       0.157708       0.099000       0.080000       0.071000       0.032000
53926     53926     gansu          107.3500       35.3400           99       149     2012      12        25        360              0.129708      -3.199585       0.000000       0.166552       0.097000   -9999.000000       0.091400   -9999.000000
53926     53926     gansu          107.3500       35.3400           99       149     2012      12        26        361              0.000000      -3.225830       0.000000       0.167952   -9999.000000   -9999.000000       0.079300   -9999.000000
53926     53926     gansu          107.3500       35.3400           99       149     2012      12        27        362              0.127083      -3.921234       0.000000       0.161004       0.085000       0.043100       0.082700       0.010000
53926     53926     gansu          107.3500       35.3400           99       149     2012      12        28        363              0.000000      -3.549835       0.092443       0.163087   -9999.000000   -9999.000000   -9999.000000   -9999.000000
53926     53926     gansu          107.3500       35.3400           99       149     2012      12        29        364              0.000000      -5.231903       0.000000       0.150936   -9999.000000   -9999.000000       0.080500   -9999.000000
53926     53926     gansu          107.3500       35.3400           99       149     2012      12        30        365              0.000000      -7.716339       0.000000       0.140786       0.092000   -9999.000000       0.088500   -9999.000000
53926     53926     gansu          107.3500       35.3400           99       149     2012      12        31        366              0.123333      -4.613342       0.000000       0.158610   -9999.000000   -9999.000000       0.063400   -9999.000000
