# Supplementary material for: Research on Fusing Multisatellite Soil Moisture Data Based on Bayesian Model Averaging
Source: Hindawi journal article supplement (doi:10.1155/2018/9310838), 2018-06-25
Supplement: f1 [file 9310838.f1.zip › 2012_sm00-10cm_daily_ZDB_ZHY_53929_366days_allin.txt]

53929     53929     shaanxi        107.8000       35.2000           99       151     2012      01        01        001              0.000000   -9999.000000       1.663101   -9999.000000       0.079000   -9999.000000       0.058700   -9999.000000
53929     53929     shaanxi        107.8000       35.2000           99       151     2012      01        02        002              0.148000      -1.420410       0.000000       0.188687       0.084000       0.086100   -9999.000000       0.017000
53929     53929     shaanxi        107.8000       35.2000           99       151     2012      01        03        003              0.000000      -1.495636       0.000000       0.190479   -9999.000000   -9999.000000       0.057000   -9999.000000
53929     53929     shaanxi        107.8000       35.2000           99       151     2012      01        04        004              0.136522      -4.139191       0.000000       0.164175   -9999.000000   -9999.000000       0.063800   -9999.000000
53929     53929     shaanxi        107.8000       35.2000           99       151     2012      01        05        005              0.138000      -3.773499       0.000000       0.163033       0.079000   -9999.000000       0.054300   -9999.000000
53929     53929     shaanxi        107.8000       35.2000           99       151     2012      01        06        006              0.139500      -3.738983       0.000000       0.165853   -9999.000000   -9999.000000       0.062200       0.097000
53929     53929     shaanxi        107.8000       35.2000           99       151     2012      01        07        007              0.143125      -2.427490       0.000000       0.169564       0.092000       0.104000   -9999.000000   -9999.000000
53929     53929     shaanxi        107.8000       35.2000           99       151     2012      01        08        008              0.000000      -1.647980       0.000000       0.187296       0.086000   -9999.000000   -9999.000000   -9999.000000
53929     53929     shaanxi        107.8000       35.2000           99       151     2012      01        09        009              0.140750      -1.426300       0.000000       0.192489   -9999.000000   -9999.000000   -9999.000000       0.020000
53929     53929     shaanxi        107.8000       35.2000           99       151     2012      01        10        010              0.141375      -0.826172       0.000000       0.198949       0.076000       0.064000       0.052400   -9999.000000
53929     53929     shaanxi        107.8000       35.2000           99       151     2012      01        11        011              0.140250      -1.264038       0.000000       0.195791       0.077000   -9999.000000       0.045800       0.033000
53929     53929     shaanxi        107.8000       35.2000           99       151     2012      01        12        012              0.142917      -1.484467       0.000000       0.190516       0.089000   -9999.000000       0.050100   -9999.000000
53929     53929     shaanxi        107.8000       35.2000           99       151     2012      01        13        013              0.142375      -1.011383       0.034943       0.195916       0.084000   -9999.000000   -9999.000000   -9999.000000
53929     53929     shaanxi        107.8000       35.2000           99       151     2012      01        14        014              0.141667      -1.052521       0.000000       0.195786   -9999.000000   -9999.000000       0.049800       0.018000
53929     53929     shaanxi        107.8000       35.2000           99       151     2012      01        15        015              0.139042      -1.061951       0.000000       0.198144   -9999.000000       0.087900       0.038200   -9999.000000
53929     53929     shaanxi        107.8000       35.2000           99       151     2012      01        16        016              0.139167      -1.216736       0.000000       0.193273       0.078000   -9999.000000       0.051000       0.042000
53929     53929     shaanxi        107.8000       35.2000           99       151     2012      01        17        017              0.000000      -1.243469       0.000000       0.187058       0.074000   -9999.000000       0.044800   -9999.000000
53929     53929     shaanxi        107.8000       35.2000           99       151     2012      01        18        018              0.142000       0.085358       0.000000       0.210839       0.090000   -9999.000000       0.047700   -9999.000000
53929     53929     shaanxi        107.8000       35.2000           99       151     2012      01        19        019              0.143375      -0.198822       0.000000       0.206538   -9999.000000   -9999.000000   -9999.000000       0.107000
53929     53929     shaanxi        107.8000       35.2000           99       151     2012      01        20        020              0.146208      -0.826172       0.292860       0.191366   -9999.000000   -9999.000000       0.046900   -9999.000000
53929     53929     shaanxi        107.8000       35.2000           99       151     2012      01        21        021              0.148667      -1.549988       0.000000       0.185818   -9999.000000   -9999.000000       0.048000       0.103000
53929     53929     shaanxi        107.8000       35.2000           99       151     2012      01        22        022              0.148875      -5.094055       0.000000       0.150986   -9999.000000   -9999.000000       0.038800   -9999.000000
53929     53929     shaanxi        107.8000       35.2000           99       151     2012      01        23        023              0.146042      -7.848206       0.000000       0.139637   -9999.000000       0.021700       0.037800       0.004000
53929     53929     shaanxi        107.8000       35.2000           99       151     2012      01        24        024              0.143833      -8.037628       0.354755       0.137096   -9999.000000   -9999.000000   -9999.000000       0.006000
53929     53929     shaanxi        107.8000       35.2000           99       151     2012      01        25        025              0.141833      -8.144928       0.568358       0.137169   -9999.000000       0.152700   -9999.000000       0.012000
53929     53929     shaanxi        107.8000       35.2000           99       151     2012      01        26        026              0.141625      -6.218506       0.044802       0.140497   -9999.000000   -9999.000000       0.027400       0.097000
53929     53929     shaanxi        107.8000       35.2000           99       151     2012      01        27        027              0.141250      -3.631927       0.000000       0.164956   -9999.000000   -9999.000000       0.038700   -9999.000000
53929     53929     shaanxi        107.8000       35.2000           99       151     2012      01        28        028              0.144708      -2.199982       0.781947       0.176201   -9999.000000   -9999.000000       0.040500       0.173000
53929     53929     shaanxi        107.8000       35.2000           99       151     2012      01        29        029              0.146375      -0.582184       0.000000       0.200738       0.095000   -9999.000000       0.043900       0.172000
53929     53929     shaanxi        107.8000       35.2000           99       151     2012      01        30        030              0.146083      -0.113037       0.000000       0.210624   -9999.000000   -9999.000000   -9999.000000       0.200000
53929     53929     shaanxi        107.8000       35.2000           99       151     2012      01        31        031              0.150083       0.021637       0.000000       0.212264   -9999.000000   -9999.000000       0.042900       0.206000
53929     53929     shaanxi        107.8000       35.2000           99       151     2012      02        01        032              0.152792       0.975494       0.000000       0.225068       0.089000   -9999.000000       0.033800   -9999.000000
53929     53929     shaanxi        107.8000       35.2000           99       151     2012      02        02        033              0.146667       0.121124       0.000000       0.214404       0.088000       0.037700       0.045800       0.064000
53929     53929     shaanxi        107.8000       35.2000           99       151     2012      02        03        034              0.144833      -1.288910       0.000000       0.196597       0.092000   -9999.000000       0.053500       0.136000
53929     53929     shaanxi        107.8000       35.2000           99       151     2012      02        04        035              0.151250       0.316284       0.000000       0.212694   -9999.000000   -9999.000000       0.058100       0.248000
53929     53929     shaanxi        107.8000       35.2000           99       151     2012      02        05        036              0.155833       1.220612       0.000000       0.225621   -9999.000000   -9999.000000   -9999.000000       0.199000
53929     53929     shaanxi        107.8000       35.2000           99       151     2012      02        06        037              0.151917       1.680084       0.000000       0.233712       0.087000   -9999.000000       0.042000   -9999.000000
53929     53929     shaanxi        107.8000       35.2000           99       151     2012      02        07        038              0.139917      -1.269379       0.000000       0.202762   -9999.000000       0.076000       0.045400       0.056000
53929     53929     shaanxi        107.8000       35.2000           99       151     2012      02        08        039              0.138875      -2.607544       0.000000       0.177418       0.088000   -9999.000000       0.041700   -9999.000000
53929     53929     shaanxi        107.8000       35.2000           99       151     2012      02        09        040              0.140125      -3.091736       0.000000       0.168247   -9999.000000   -9999.000000       0.043400       0.105000
53929     53929     shaanxi        107.8000       35.2000           99       151     2012      02        10        041              0.140583      -3.570892       0.112049       0.162145   -9999.000000       0.037200   -9999.000000   -9999.000000
53929     53929     shaanxi        107.8000       35.2000           99       151     2012      02        11        042              0.140708      -2.018158       0.000000       0.188507       0.082000   -9999.000000   -9999.000000   -9999.000000
53929     53929     shaanxi        107.8000       35.2000           99       151     2012      02        12        043              0.146208      -0.889069       0.075459       0.192791   -9999.000000   -9999.000000   -9999.000000       0.132000
53929     53929     shaanxi        107.8000       35.2000           99       151     2012      02        13        044              0.148250      -0.105377       0.000000       0.207492       0.098000   -9999.000000       0.029100   -9999.000000
53929     53929     shaanxi        107.8000       35.2000           99       151     2012      02        14        045              0.152957       0.304382       0.000000       0.212190   -9999.000000   -9999.000000   -9999.000000       0.278000
53929     53929     shaanxi        107.8000       35.2000           99       151     2012      02        15        046              0.161458       2.074280       0.000000       0.236057   -9999.000000   -9999.000000       0.055700   -9999.000000
53929     53929     shaanxi        107.8000       35.2000           99       151     2012      02        16        047              0.155208       0.811646       0.000000       0.228632       0.087000   -9999.000000   -9999.000000       0.143000
53929     53929     shaanxi        107.8000       35.2000           99       151     2012      02        17        048              0.149500       0.710663       0.000000       0.217187       0.084000   -9999.000000       0.047700       0.086000
53929     53929     shaanxi        107.8000       35.2000           99       151     2012      02        18        049              0.148167      -0.725220       0.000000       0.200402       0.095000   -9999.000000       0.038700   -9999.000000
53929     53929     shaanxi        107.8000       35.2000           99       151     2012      02        19        050              0.151833       0.065033       0.000000       0.209061       0.092000   -9999.000000       0.049700       0.175000
53929     53929     shaanxi        107.8000       35.2000           99       151     2012      02        20        051              0.155667       1.623108       0.000000       0.223367   -9999.000000       0.031600       0.059000   -9999.000000
53929     53929     shaanxi        107.8000       35.2000           99       151     2012      02        21        052              0.161417       1.869659       0.000000       0.231794   -9999.000000   -9999.000000   -9999.000000       0.095000
53929     53929     shaanxi        107.8000       35.2000           99       151     2012      02        22        053              0.170458       3.699951       0.190198       0.247829       0.072000   -9999.000000   -9999.000000       0.402000
53929     53929     shaanxi        107.8000       35.2000           99       151     2012      02        23        054              0.175208       2.905396       0.359830       0.252507       0.075000   -9999.000000       0.046300       0.267000
53929     53929     shaanxi        107.8000       35.2000           99       151     2012      02        24        055              0.176500       1.296692      11.847798       0.241630       0.085000   -9999.000000       0.054700       0.157000
53929     53929     shaanxi        107.8000       35.2000           99       151     2012      02        25        056              0.169500       1.081238       0.000000       0.229395   -9999.000000   -9999.000000       0.051400   -9999.000000
53929     53929     shaanxi        107.8000       35.2000           99       151     2012      02        26        057              0.168333      -0.656677       0.155275       0.203954   -9999.000000   -9999.000000       0.060200       0.220000
53929     53929     shaanxi        107.8000       35.2000           99       151     2012      02        27        058              0.170958       1.078186       0.000000       0.222132       0.073000   -9999.000000   -9999.000000       0.199000
53929     53929     shaanxi        107.8000       35.2000           99       151     2012      02        28        059              0.171750       1.229828       0.000000       0.223996       0.077000       0.112100   -9999.000000       0.261000
53929     53929     shaanxi        107.8000       35.2000           99       151     2012      02        29        060              0.000000   -9999.000000       0.000000   -9999.000000       0.083000   -9999.000000   -9999.000000   -9999.000000
53929     53929     shaanxi        107.8000       35.2000           99       151     2012      03        01        061              0.185792       1.237579       0.046055       0.232793   -9999.000000   -9999.000000       0.053000   -9999.000000
53929     53929     shaanxi        107.8000       35.2000           99       151     2012      03        02        062              0.192583       2.377350       1.084559       0.252357       0.088000   -9999.000000       0.051600       0.422000
53929     53929     shaanxi        107.8000       35.2000           99       151     2012      03        03        063              0.196042       1.403717       0.000000       0.250837       0.090000   -9999.000000       0.055400       0.404000
53929     53929     shaanxi        107.8000       35.2000           99       151     2012      03        04        064              0.197625       1.149292       0.150742       0.242975   -9999.000000       0.144000   -9999.000000       0.410000
53929     53929     shaanxi        107.8000       35.2000           99       151     2012      03        05        065              0.206583       0.751862       0.135568       0.232405       0.110000   -9999.000000       0.048700       0.273000
53929     53929     shaanxi        107.8000       35.2000           99       151     2012      03        06        066              0.214458       2.562042       0.036434       0.249273       0.109000   -9999.000000       0.040300   -9999.000000
53929     53929     shaanxi        107.8000       35.2000           99       151     2012      03        07        067              0.000000       2.608948       0.134127       0.247965       0.086000   -9999.000000       0.049400       0.386000
53929     53929     shaanxi        107.8000       35.2000           99       151     2012      03        08        068              0.230958       2.983215       0.487920       0.258900       0.094000   -9999.000000       0.057600   -9999.000000
53929     53929     shaanxi        107.8000       35.2000           99       151     2012      03        09        069              0.243917       2.306091       0.188370       0.261236       0.103000       0.077100       0.065900       0.444000
53929     53929     shaanxi        107.8000       35.2000           99       151     2012      03        10        070              0.260875       2.979034       0.000000       0.262193       0.115000   -9999.000000   -9999.000000   -9999.000000
53929     53929     shaanxi        107.8000       35.2000           99       151     2012      03        11        071              0.292500       6.000183       0.000000       0.275111       0.102000   -9999.000000       0.048200   -9999.000000
53929     53929     shaanxi        107.8000       35.2000           99       151     2012      03        12        072              0.306625       6.813232       0.084246       0.277446   -9999.000000       0.051700       0.052700       0.511000
53929     53929     shaanxi        107.8000       35.2000           99       151     2012      03        13        073              0.307708       6.516510       0.000000       0.276284   -9999.000000   -9999.000000       0.064100   -9999.000000
53929     53929     shaanxi        107.8000       35.2000           99       151     2012      03        14        074              0.307167       9.794952       0.000000       0.274499       0.092500   -9999.000000   -9999.000000       0.507000
53929     53929     shaanxi        107.8000       35.2000           99       151     2012      03        15        075              0.304250       9.176147       0.120803       0.273978       0.088500   -9999.000000   -9999.000000   -9999.000000
53929     53929     shaanxi        107.8000       35.2000           99       151     2012      03        16        076              0.300750       5.615204       0.000000       0.277723       0.090000   -9999.000000       0.059900       0.561000
53929     53929     shaanxi        107.8000       35.2000           99       151     2012      03        17        077              0.294208       9.534027       0.000000       0.273383   -9999.000000   -9999.000000       0.046900       0.567000
53929     53929     shaanxi        107.8000       35.2000           99       151     2012      03        18        078              0.287458      12.108948       0.145350       0.269350   -9999.000000   -9999.000000       0.065000   -9999.000000
53929     53929     shaanxi        107.8000       35.2000           99       151     2012      03        19        079              0.283333      12.582367       0.000000       0.266064       0.083500   -9999.000000       0.073800       0.412000
53929     53929     shaanxi        107.8000       35.2000           99       151     2012      03        20        080              0.279958       8.056732       0.066100       0.269857       0.091000   -9999.000000       0.077500   -9999.000000
53929     53929     shaanxi        107.8000       35.2000           99       151     2012      03        21        081              0.278792       7.999054       0.211436       0.270430       0.111000   -9999.000000   -9999.000000       0.446000
53929     53929     shaanxi        107.8000       35.2000           99       151     2012      03        22        082              0.278875       5.191833       0.175765       0.274338   -9999.000000       0.045000       0.062900       0.539000
53929     53929     shaanxi        107.8000       35.2000           99       151     2012      03        23        083              0.272167       4.342102       0.046680       0.272554   -9999.000000   -9999.000000       0.053400       0.345000
53929     53929     shaanxi        107.8000       35.2000           99       151     2012      03        24        084              0.267083       7.364685       0.049081       0.262375       0.088000   -9999.000000       0.059600       0.298000
53929     53929     shaanxi        107.8000       35.2000           99       151     2012      03        25        085              0.000000      10.703430       0.000000       0.262517       0.081000   -9999.000000       0.064700   -9999.000000
53929     53929     shaanxi        107.8000       35.2000           99       151     2012      03        26        086              0.259417      12.057861       0.929156       0.257105       0.087000   -9999.000000       0.067000       0.247000
53929     53929     shaanxi        107.8000       35.2000           99       151     2012      03        27        087              0.254208      13.190552       0.000000       0.254009       0.081000       0.070100   -9999.000000       0.318000
53929     53929     shaanxi        107.8000       35.2000           99       151     2012      03        28        088              0.263542      14.733917       3.143261       0.249854       0.109000   -9999.000000       0.078100       0.506000
53929     53929     shaanxi        107.8000       35.2000           99       151     2012      03        29        089              0.263625       9.898865       0.109375       0.277792       0.099000   -9999.000000       0.084200       0.468000
53929     53929     shaanxi        107.8000       35.2000           99       151     2012      03        30        090              0.255542      13.232269       0.000000       0.268396       0.080000   -9999.000000       0.063200   -9999.000000
53929     53929     shaanxi        107.8000       35.2000           99       151     2012      03        31        091              0.248792       9.115356       0.000000       0.261947       0.075000   -9999.000000       0.067500       0.310000
53929     53929     shaanxi        107.8000       35.2000           99       151     2012      04        01        092              0.243833      13.821350       0.174800       0.253270       0.092000       0.098900   -9999.000000       0.198000
53929     53929     shaanxi        107.8000       35.2000           99       151     2012      04        02        093              0.238667      13.624329       0.182010       0.252713   -9999.000000   -9999.000000       0.077000       0.131000
53929     53929     shaanxi        107.8000       35.2000           99       151     2012      04        03        094              0.232458      10.838867       0.000000       0.250844       0.092000   -9999.000000       0.050200       0.162000
53929     53929     shaanxi        107.8000       35.2000           99       151     2012      04        04        095              0.224500      13.568024       0.000000       0.245195       0.079000   -9999.000000       0.070500   -9999.000000
53929     53929     shaanxi        107.8000       35.2000           99       151     2012      04        05        096              0.217458      16.058868       0.000000       0.238308       0.078500   -9999.000000       0.061300       0.187000
53929     53929     shaanxi        107.8000       35.2000           99       151     2012      04        06        097              0.212250      14.389954       0.435267       0.235642       0.085000   -9999.000000       0.065400   -9999.000000
53929     53929     shaanxi        107.8000       35.2000           99       151     2012      04        07        098              0.206917      14.294556       0.000000       0.233835   -9999.000000   -9999.000000   -9999.000000       0.114000
53929     53929     shaanxi        107.8000       35.2000           99       151     2012      04        08        099              0.201167      16.083466       0.000000       0.228435       0.083000   -9999.000000       0.065500   -9999.000000
53929     53929     shaanxi        107.8000       35.2000           99       151     2012      04        09        100              0.213167      18.088104      14.091042       0.222861       0.116000   -9999.000000       0.107600   -9999.000000
53929     53929     shaanxi        107.8000       35.2000           99       151     2012      04        10        101              0.226583      12.473267       0.000000       0.305667       0.094500   -9999.000000       0.082400       0.533000
53929     53929     shaanxi        107.8000       35.2000           99       151     2012      04        11        102              0.219083      16.761414       2.719030       0.287378       0.111000   -9999.000000       0.090800   -9999.000000
53929     53929     shaanxi        107.8000       35.2000           99       151     2012      04        12        103              0.218667      12.371552       0.000000       0.287519   -9999.000000   -9999.000000   -9999.000000       0.215000
53929     53929     shaanxi        107.8000       35.2000           99       151     2012      04        13        104              0.211708       9.668793       0.000000       0.282826       0.102000   -9999.000000   -9999.000000   -9999.000000
53929     53929     shaanxi        107.8000       35.2000           99       151     2012      04        14        105              0.205458      14.267456       0.437441       0.270990       0.085000   -9999.000000       0.067800       0.199000
53929     53929     shaanxi        107.8000       35.2000           99       151     2012      04        15        106              0.197583      16.066833       0.000000       0.264011       0.085500   -9999.000000       0.078700       0.284000
53929     53929     shaanxi        107.8000       35.2000           99       151     2012      04        16        107              0.190348      18.410675       0.000000       0.255385       0.086000   -9999.000000       0.082700   -9999.000000
53929     53929     shaanxi        107.8000       35.2000           99       151     2012      04        17        108              0.187958      17.550446       0.173810       0.250382       0.109000   -9999.000000       0.101100       0.279000
53929     53929     shaanxi        107.8000       35.2000           99       151     2012      04        18        109              0.185000      14.714661       0.000000       0.253905       0.090000   -9999.000000   -9999.000000   -9999.000000
53929     53929     shaanxi        107.8000       35.2000           99       151     2012      04        19        110              0.180500      18.617279       2.838377       0.245379       0.102000       0.093800       0.102900       0.173000
53929     53929     shaanxi        107.8000       35.2000           99       151     2012      04        20        111              0.178958      14.984222       0.000000       0.264890       0.081000   -9999.000000       0.068700       0.188000
53929     53929     shaanxi        107.8000       35.2000           99       151     2012      04        21        112              0.175042      16.677124       0.000000       0.255992       0.096000   -9999.000000       0.093600       0.169000
53929     53929     shaanxi        107.8000       35.2000           99       151     2012      04        22        113              0.170208      19.812500       0.000000       0.240941       0.110000   -9999.000000   -9999.000000       0.157000
53929     53929     shaanxi        107.8000       35.2000           99       151     2012      04        23        114              0.183042      22.267487      12.353637       0.229711       0.170000   -9999.000000       0.082900   -9999.000000
53929     53929     shaanxi        107.8000       35.2000           99       151     2012      04        24        115              0.202250      19.456482       0.000000       0.288816       0.137000   -9999.000000   -9999.000000       0.605000
53929     53929     shaanxi        107.8000       35.2000           99       151     2012      04        25        116              0.000000      16.271637       0.228451       0.281472       0.106000   -9999.000000       0.108800       0.230000
53929     53929     shaanxi        107.8000       35.2000           99       151     2012      04        26        117              0.187208      16.686066       0.000000       0.264174       0.101000   -9999.000000       0.110400       0.319000
53929     53929     shaanxi        107.8000       35.2000           99       151     2012      04        27        118              0.183375      19.219696       0.000000       0.251475       0.097000       0.109400       0.093200       0.138000
53929     53929     shaanxi        107.8000       35.2000           99       151     2012      04        28        119              0.180833      20.683502      18.152126       0.240858   -9999.000000   -9999.000000       0.063300   -9999.000000
53929     53929     shaanxi        107.8000       35.2000           99       151     2012      04        29        120              0.181250      20.929108       0.000000       0.301057       0.117000   -9999.000000   -9999.000000       0.301000
53929     53929     shaanxi        107.8000       35.2000           99       151     2012      04        30        121              0.180083      21.251007       1.478548       0.295910       0.131000   -9999.000000   -9999.000000       0.687000
53929     53929     shaanxi        107.8000       35.2000           99       151     2012      05        01        122              0.187667      17.608032       1.426747       0.290122       0.167500   -9999.000000       0.124500       0.497000
53929     53929     shaanxi        107.8000       35.2000           99       151     2012      05        02        123              0.190083      18.451202       1.951760       0.290111       0.168000   -9999.000000       0.146400       0.806000
53929     53929     shaanxi        107.8000       35.2000           99       151     2012      05        03        124              0.198250      17.377747       0.686099       0.295507       0.171000   -9999.000000       0.134300   -9999.000000
53929     53929     shaanxi        107.8000       35.2000           99       151     2012      05        04        125              0.194917      17.823853       0.067994       0.293538       0.146000   -9999.000000       0.122800       0.536000
53929     53929     shaanxi        107.8000       35.2000           99       151     2012      05        05        126              0.189083      20.332672       0.598078       0.281107       0.125500   -9999.000000   -9999.000000   -9999.000000
53929     53929     shaanxi        107.8000       35.2000           99       151     2012      05        06        127              0.182958      22.102051       5.758329       0.271099       0.138000   -9999.000000       0.143100       0.289000
53929     53929     shaanxi        107.8000       35.2000           99       151     2012      05        07        128              0.183208      18.462463       1.450022       0.290240   -9999.000000       0.166500       0.100900   -9999.000000
53929     53929     shaanxi        107.8000       35.2000           99       151     2012      05        08        129              0.180000      21.422638       0.100253       0.297270       0.120000   -9999.000000       0.118400   -9999.000000
53929     53929     shaanxi        107.8000       35.2000           99       151     2012      05        09        130              0.175167      23.505890       0.000000       0.280647   -9999.000000   -9999.000000       0.099600       0.399000
53929     53929     shaanxi        107.8000       35.2000           99       151     2012      05        10        131              0.179917      22.624664      10.469309       0.273162   -9999.000000   -9999.000000       0.099100   -9999.000000
53929     53929     shaanxi        107.8000       35.2000           99       151     2012      05        11        132              0.229333      22.822113       0.260990       0.285614       0.171500   -9999.000000   -9999.000000       0.537000
53929     53929     shaanxi        107.8000       35.2000           99       151     2012      05        12        133              0.209083      19.517517       0.000000       0.299668       0.147500   -9999.000000       0.107900   -9999.000000
53929     53929     shaanxi        107.8000       35.2000           99       151     2012      05        13        134              0.197542      16.532288       0.738343       0.283941       0.153000   -9999.000000       0.113200       0.578000
53929     53929     shaanxi        107.8000       35.2000           99       151     2012      05        14        135              0.189625      15.505920       0.239629       0.278828       0.156000   -9999.000000       0.134700       0.319000
53929     53929     shaanxi        107.8000       35.2000           99       151     2012      05        15        136              0.181625      18.659210       0.000000       0.267950       0.150000   -9999.000000       0.141100   -9999.000000
53929     53929     shaanxi        107.8000       35.2000           99       151     2012      05        16        137              0.172875      20.064178       0.000000       0.257373       0.122500   -9999.000000   -9999.000000       0.231000
53929     53929     shaanxi        107.8000       35.2000           99       151     2012      05        17        138              0.165458      20.955109       0.000000       0.247839       0.123000   -9999.000000   -9999.000000   -9999.000000
53929     53929     shaanxi        107.8000       35.2000           99       151     2012      05        18        139              0.159375      21.652954       0.245091       0.241007       0.118000   -9999.000000       0.114100       0.306000
53929     53929     shaanxi        107.8000       35.2000           99       151     2012      05        19        140              0.153583      23.714386       0.126866       0.233901   -9999.000000   -9999.000000       0.145000       0.325000
53929     53929     shaanxi        107.8000       35.2000           99       151     2012      05        20        141              0.147917      25.044739       0.243220       0.225445   -9999.000000   -9999.000000       0.133700       0.273000
53929     53929     shaanxi        107.8000       35.2000           99       151     2012      05        21        142              0.149458      21.100311       4.900237       0.228169       0.195500   -9999.000000       0.187600       0.832000
53929     53929     shaanxi        107.8000       35.2000           99       151     2012      05        22        143              0.160417      16.954407       0.000000       0.273585       0.157500   -9999.000000   -9999.000000   -9999.000000
53929     53929     shaanxi        107.8000       35.2000           99       151     2012      05        23        144              0.159250      18.104584       0.136713       0.262829   -9999.000000   -9999.000000       0.176900       0.461000
53929     53929     shaanxi        107.8000       35.2000           99       151     2012      05        24        145              0.157167      16.731873       0.198862       0.257471       0.153000   -9999.000000       0.154600       0.255000
53929     53929     shaanxi        107.8000       35.2000           99       151     2012      05        25        146              0.000000      16.171661       0.000000       0.254831       0.152000   -9999.000000       0.179400       0.420000
53929     53929     shaanxi        107.8000       35.2000           99       151     2012      05        26        147              0.150042      19.560425       0.023195       0.245213       0.130000   -9999.000000       0.162200       0.367000
53929     53929     shaanxi        107.8000       35.2000           99       151     2012      05        27        148              0.145625      22.876129       0.000000       0.232601       0.134500       0.159500       0.158500   -9999.000000
53929     53929     shaanxi        107.8000       35.2000           99       151     2012      05        28        149              0.169917      24.778961      20.288883       0.221118   -9999.000000   -9999.000000   -9999.000000       0.957000
53929     53929     shaanxi        107.8000       35.2000           99       151     2012      05        29        150              0.207042      17.550507       0.000000       0.312064       0.151000   -9999.000000       0.172200   -9999.000000
53929     53929     shaanxi        107.8000       35.2000           99       151     2012      05        30        151              0.188458      21.145081       1.384932       0.294399       0.154000   -9999.000000       0.176200   -9999.000000
53929     53929     shaanxi        107.8000       35.2000           99       151     2012      05        31        152              0.176500      21.967865       0.193588       0.284208       0.155000   -9999.000000       0.157600   -9999.000000
53929     53929     shaanxi        107.8000       35.2000           99       151     2012      06        01        153              0.167917      19.932098       0.000000       0.276143       0.124000   -9999.000000       0.159000   -9999.000000
53929     53929     shaanxi        107.8000       35.2000           99       151     2012      06        02        154              0.158417      23.070221       0.000000       0.261699       0.121000   -9999.000000   -9999.000000       0.492000
53929     53929     shaanxi        107.8000       35.2000           99       151     2012      06        03        155              0.150958      23.752197       0.000000       0.251281       0.121000   -9999.000000   -9999.000000   -9999.000000
53929     53929     shaanxi        107.8000       35.2000           99       151     2012      06        04        156              0.145500      23.244995       0.571740       0.244097       0.133000   -9999.000000       0.141000       0.375000
53929     53929     shaanxi        107.8000       35.2000           99       151     2012      06        05        157              0.141417      24.273499       2.017761       0.236446       0.163000   -9999.000000       0.197800   -9999.000000
53929     53929     shaanxi        107.8000       35.2000           99       151     2012      06        06        158              0.141042      19.942719       0.000000       0.255574       0.129500   -9999.000000       0.165700   -9999.000000
53929     53929     shaanxi        107.8000       35.2000           99       151     2012      06        07        159              0.138750      22.588409       0.000000       0.246810       0.123000   -9999.000000       0.168900       0.456000
53929     53929     shaanxi        107.8000       35.2000           99       151     2012      06        08        160              0.135333      24.410370       0.457303       0.231895       0.129000   -9999.000000   -9999.000000   -9999.000000
53929     53929     shaanxi        107.8000       35.2000           99       151     2012      06        09        161              0.134417      22.529724       0.000000       0.226545   -9999.000000   -9999.000000       0.169000       0.453000
53929     53929     shaanxi        107.8000       35.2000           99       151     2012      06        10        162              0.131500      26.446808       0.000000       0.213967       0.129000   -9999.000000       0.158300   -9999.000000
53929     53929     shaanxi        107.8000       35.2000           99       151     2012      06        11        163              0.000000      25.672638       0.000000       0.203656       0.110000   -9999.000000       0.184300       0.375000
53929     53929     shaanxi        107.8000       35.2000           99       151     2012      06        12        164              0.126750      25.007843       0.000000       0.197011       0.104000   -9999.000000       0.170700       0.499000
53929     53929     shaanxi        107.8000       35.2000           99       151     2012      06        13        165              0.125708      27.143250       0.095257       0.190156       0.114000   -9999.000000       0.164500   -9999.000000
53929     53929     shaanxi        107.8000       35.2000           99       151     2012      06        14        166              0.122250      28.537109       0.000000       0.184504       0.105000   -9999.000000   -9999.000000       0.386000
53929     53929     shaanxi        107.8000       35.2000           99       151     2012      06        15        167              0.120583      25.578400       0.000000       0.182197       0.121000   -9999.000000       0.162100   -9999.000000
53929     53929     shaanxi        107.8000       35.2000           99       151     2012      06        16        168              0.119333      26.436432       0.000000       0.180601       0.123000   -9999.000000       0.181500       0.400000
53929     53929     shaanxi        107.8000       35.2000           99       151     2012      06        17        169              0.118083      27.361786       0.000000       0.178677       0.108500   -9999.000000       0.163600       0.554000
53929     53929     shaanxi        107.8000       35.2000           99       151     2012      06        18        170              0.116250      27.744019       5.567340       0.177912       0.105000   -9999.000000       0.137300       0.445000
53929     53929     shaanxi        107.8000       35.2000           99       151     2012      06        19        171              0.115792      25.650055       0.231470       0.225375       0.111000       0.271600   -9999.000000       0.457000
53929     53929     shaanxi        107.8000       35.2000           99       151     2012      06        20        172              0.116167      25.050446       0.000000       0.225252       0.135000   -9999.000000       0.164900   -9999.000000
53929     53929     shaanxi        107.8000       35.2000           99       151     2012      06        21        173              0.115333      27.269165       0.224990       0.204805       0.128000   -9999.000000       0.129600       0.405000
53929     53929     shaanxi        107.8000       35.2000           99       151     2012      06        22        174              0.114583      28.197693       0.000000       0.192499       0.098000   -9999.000000       0.163900       0.538000
53929     53929     shaanxi        107.8000       35.2000           99       151     2012      06        23        175              0.113042      29.517761       9.951656       0.183759       0.101000   -9999.000000       0.150100       0.473000
53929     53929     shaanxi        107.8000       35.2000           99       151     2012      06        24        176              0.109917      29.422394       0.725942       0.230112   -9999.000000       0.305000       0.173100       0.579000
53929     53929     shaanxi        107.8000       35.2000           99       151     2012      06        25        177              0.107958      24.316772       3.973703       0.264747   -9999.000000   -9999.000000   -9999.000000   -9999.000000
53929     53929     shaanxi        107.8000       35.2000           99       151     2012      06        26        178              0.109042      23.232666       1.633461       0.273926       0.128000   -9999.000000       0.168900       0.574000
53929     53929     shaanxi        107.8000       35.2000           99       151     2012      06        27        179              0.108292      23.961334       0.350092       0.258178       0.130000   -9999.000000       0.177400   -9999.000000
53929     53929     shaanxi        107.8000       35.2000           99       151     2012      06        28        180              0.109292      22.705505      13.534833       0.261011       0.144500   -9999.000000       0.160800       0.770000
53929     53929     shaanxi        107.8000       35.2000           99       151     2012      06        29        181              0.198167      22.564728       7.767971       0.283423       0.146000   -9999.000000       0.183000   -9999.000000
53929     53929     shaanxi        107.8000       35.2000           99       151     2012      06        30        182              0.211417      23.235199       0.000000       0.322807   -9999.000000   -9999.000000   -9999.000000   -9999.000000
53929     53929     shaanxi        107.8000       35.2000           99       151     2012      07        01        183              0.194792      25.681580       4.313764       0.288757   -9999.000000   -9999.000000   -9999.000000       0.479000
53929     53929     shaanxi        107.8000       35.2000           99       151     2012      07        02        184              0.222458      27.164642       0.188411       0.279305       0.104500   -9999.000000       0.138900   -9999.000000
53929     53929     shaanxi        107.8000       35.2000           99       151     2012      07        03        185              0.205333      25.462524       0.000000       0.282867       0.103000   -9999.000000       0.147300       0.451000
53929     53929     shaanxi        107.8000       35.2000           99       151     2012      07        04        186              0.188875      27.587372       2.119380       0.264150       0.109000   -9999.000000       0.146400   -9999.000000
53929     53929     shaanxi        107.8000       35.2000           99       151     2012      07        05        187              0.175542      25.470703       0.000000       0.267504       0.102000   -9999.000000       0.147700   -9999.000000
53929     53929     shaanxi        107.8000       35.2000           99       151     2012      07        06        188              0.164375      27.200623      13.935642       0.252400   -9999.000000   -9999.000000   -9999.000000       0.533000
53929     53929     shaanxi        107.8000       35.2000           99       151     2012      07        07        189              0.176667      26.191956       1.285110       0.272686   -9999.000000   -9999.000000       0.167100   -9999.000000
53929     53929     shaanxi        107.8000       35.2000           99       151     2012      07        08        190              0.252208      26.244446      26.875261       0.302810       0.134500   -9999.000000       0.140700       0.891000
53929     53929     shaanxi        107.8000       35.2000           99       151     2012      07        09        191              0.253958      23.095886       1.901562       0.358265       0.128500   -9999.000000       0.191800   -9999.000000
53929     53929     shaanxi        107.8000       35.2000           99       151     2012      07        10        192              0.237958      23.177460       0.000000       0.331548       0.111000       0.233700       0.183500       0.831000
53929     53929     shaanxi        107.8000       35.2000           99       151     2012      07        11        193              0.222292      27.449249       0.140462       0.309957   -9999.000000   -9999.000000       0.176500       0.639000
53929     53929     shaanxi        107.8000       35.2000           99       151     2012      07        12        194              0.207333      25.513885       0.401256       0.301805       0.117000   -9999.000000   -9999.000000   -9999.000000
53929     53929     shaanxi        107.8000       35.2000           99       151     2012      07        13        195              0.192000      27.267456       0.153212       0.289623       0.119500       0.336900       0.158800       0.513000
53929     53929     shaanxi        107.8000       35.2000           99       151     2012      07        14        196              0.197375      26.645142       2.414171       0.280096       0.110000   -9999.000000       0.175600   -9999.000000
53929     53929     shaanxi        107.8000       35.2000           99       151     2012      07        15        197              0.213875      27.309723       0.639284       0.280933       0.117000       0.210300       0.161900       0.548000
53929     53929     shaanxi        107.8000       35.2000           99       151     2012      07        16        198              0.197833      26.302887       0.291052       0.279906       0.120000   -9999.000000       0.182600       0.563000
53929     53929     shaanxi        107.8000       35.2000           99       151     2012      07        17        199              0.184542      26.310822       0.000000       0.271307       0.125000   -9999.000000   -9999.000000       0.508000
53929     53929     shaanxi        107.8000       35.2000           99       151     2012      07        18        200              0.174750      25.610626       0.000000       0.265206       0.106500       0.132400   -9999.000000       0.411000
53929     53929     shaanxi        107.8000       35.2000           99       151     2012      07        19        201              0.167708      26.232361       0.091844       0.257316       0.112500   -9999.000000       0.144100   -9999.000000
53929     53929     shaanxi        107.8000       35.2000           99       151     2012      07        20        202              0.172130      25.150970       4.440074       0.257861   -9999.000000   -9999.000000       0.174800       0.662000
53929     53929     shaanxi        107.8000       35.2000           99       151     2012      07        21        203              0.266609      25.009521      31.167856       0.285841   -9999.000000       0.101000       0.162900       1.000000
53929     53929     shaanxi        107.8000       35.2000           99       151     2012      07        22        204              0.258250      21.943298       0.107789       0.362300       0.143000   -9999.000000       0.208200       0.946000
53929     53929     shaanxi        107.8000       35.2000           99       151     2012      07        23        205              0.253208      25.682465       1.812551       0.321669       0.139000       0.155700   -9999.000000       0.788000
53929     53929     shaanxi        107.8000       35.2000           99       151     2012      07        24        206              0.251792      22.683167       4.403424       0.317830       0.140000   -9999.000000       0.151500   -9999.000000
53929     53929     shaanxi        107.8000       35.2000           99       151     2012      07        25        207              0.246583      23.936676       0.463355       0.327143       0.140000   -9999.000000       0.125500       0.755000
53929     53929     shaanxi        107.8000       35.2000           99       151     2012      07        26        208              0.236208      26.785522       4.077967       0.310986   -9999.000000   -9999.000000       0.149500   -9999.000000
53929     53929     shaanxi        107.8000       35.2000           99       151     2012      07        27        209              0.219667      27.602264       0.817114       0.315492   -9999.000000   -9999.000000       0.139900       0.732000
53929     53929     shaanxi        107.8000       35.2000           99       151     2012      07        28        210              0.202292      28.300629       1.331884       0.304696       0.127000       0.234400       0.135900       0.575000
53929     53929     shaanxi        107.8000       35.2000           99       151     2012      07        29        211              0.188208      29.203217       0.000000       0.291673       0.108000   -9999.000000   -9999.000000   -9999.000000
53929     53929     shaanxi        107.8000       35.2000           99       151     2012      07        30        212              0.178292      29.695129       5.738685       0.280225       0.121000       0.152200       0.107600       0.902000
53929     53929     shaanxi        107.8000       35.2000           99       151     2012      07        31        213              0.174167      25.379181       1.923496       0.303246   -9999.000000       0.037900       0.118300   -9999.000000
53929     53929     shaanxi        107.8000       35.2000           99       151     2012      08        01        214              0.172750      23.569244       0.560974       0.300625   -9999.000000   -9999.000000       0.102400       0.664000
53929     53929     shaanxi        107.8000       35.2000           99       151     2012      08        02        215              0.178042      23.475983       0.151319       0.298500       0.135000   -9999.000000       0.106300   -9999.000000
53929     53929     shaanxi        107.8000       35.2000           99       151     2012      08        03        216              0.175000      26.852295       0.000000       0.287056       0.119000   -9999.000000   -9999.000000   -9999.000000
53929     53929     shaanxi        107.8000       35.2000           99       151     2012      08        04        217              0.167458      27.542847       0.429959       0.278511       0.110000   -9999.000000   -9999.000000       0.617000
53929     53929     shaanxi        107.8000       35.2000           99       151     2012      08        05        218              0.161333      27.026276       1.462076       0.273499       0.113000   -9999.000000       0.090600   -9999.000000
53929     53929     shaanxi        107.8000       35.2000           99       151     2012      08        06        219              0.156417      26.316956       0.282826       0.278584       0.133000   -9999.000000       0.110000       0.540000
53929     53929     shaanxi        107.8000       35.2000           99       151     2012      08        07        220              0.151625      26.548401       2.064420       0.273142   -9999.000000   -9999.000000       0.098900   -9999.000000
53929     53929     shaanxi        107.8000       35.2000           99       151     2012      08        08        221              0.147417      27.386627       0.806157       0.277581       0.138000       0.009900       0.105500       0.450000
53929     53929     shaanxi        107.8000       35.2000           99       151     2012      08        09        222              0.143667      26.997345       4.600096       0.272381       0.122000   -9999.000000   -9999.000000       0.624000
53929     53929     shaanxi        107.8000       35.2000           99       151     2012      08        10        223              0.139083      27.804871       0.000000       0.284677       0.112500       0.208900       0.104500   -9999.000000
53929     53929     shaanxi        107.8000       35.2000           99       151     2012      08        11        224              0.135917      26.159607       1.660013       0.275364       0.133000   -9999.000000       0.104100       0.629000
53929     53929     shaanxi        107.8000       35.2000           99       151     2012      08        12        225              0.137708      27.740997       0.248174       0.270885       0.124000       0.165800       0.112300   -9999.000000
53929     53929     shaanxi        107.8000       35.2000           99       151     2012      08        13        226              0.139458      26.853790       4.102125       0.268381       0.186000       0.167300       0.136800       0.741000
53929     53929     shaanxi        107.8000       35.2000           99       151     2012      08        14        227              0.157333      23.893616       7.998538       0.282898       0.181000   -9999.000000       0.138300       0.931000
53929     53929     shaanxi        107.8000       35.2000           99       151     2012      08        15        228              0.164833      24.111176       0.114536       0.315513       0.143500   -9999.000000   -9999.000000       0.810000
53929     53929     shaanxi        107.8000       35.2000           99       151     2012      08        16        229              0.159875      26.235474       0.000000       0.288869       0.128000   -9999.000000       0.122000       0.567000
53929     53929     shaanxi        107.8000       35.2000           99       151     2012      08        17        230              0.229958      25.218719      28.506805       0.281100   -9999.000000   -9999.000000       0.147400   -9999.000000
53929     53929     shaanxi        107.8000       35.2000           99       151     2012      08        18        231              0.266083      22.601562      13.123328       0.351266       0.179000       0.332700       0.142200       1.000000
53929     53929     shaanxi        107.8000       35.2000           99       151     2012      08        19        232              0.264042      20.071991       0.854164       0.355763       0.168000   -9999.000000       0.151200       1.000000
53929     53929     shaanxi        107.8000       35.2000           99       151     2012      08        20        233              0.255167      21.247955       2.194037       0.338357       0.156500   -9999.000000   -9999.000000       0.963000
53929     53929     shaanxi        107.8000       35.2000           99       151     2012      08        21        234              0.243167      23.273010       0.000000       0.329455       0.148500   -9999.000000       0.127100   -9999.000000
53929     53929     shaanxi        107.8000       35.2000           99       151     2012      08        22        235              0.229917      21.378662       0.000000       0.318467       0.141000       0.158400       0.091000   -9999.000000
53929     53929     shaanxi        107.8000       35.2000           99       151     2012      08        23        236              0.209667      22.458527       0.000000       0.308730   -9999.000000       0.092400       0.115800       0.563000
53929     53929     shaanxi        107.8000       35.2000           99       151     2012      08        24        237              0.193375      22.128052       0.000000       0.303363   -9999.000000   -9999.000000       0.100000   -9999.000000
53929     53929     shaanxi        107.8000       35.2000           99       151     2012      08        25        238              0.000000      23.015442      20.699728       0.297253       0.138500   -9999.000000       0.100500       0.932000
53929     53929     shaanxi        107.8000       35.2000           99       151     2012      08        26        239              0.261417      23.421539       0.000000       0.337599       0.143000       0.191900   -9999.000000       0.901000
53929     53929     shaanxi        107.8000       35.2000           99       151     2012      08        27        240              0.248750      23.502960       3.387261       0.331568       0.149000   -9999.000000       0.148500   -9999.000000
53929     53929     shaanxi        107.8000       35.2000           99       151     2012      08        28        241              0.242167      22.728699       0.000000       0.326884       0.130000       0.250000       0.131300       0.722000
53929     53929     shaanxi        107.8000       35.2000           99       151     2012      08        29        242              0.222083      23.362274       0.000000       0.315746       0.143000   -9999.000000       0.137900   -9999.000000
53929     53929     shaanxi        107.8000       35.2000           99       151     2012      08        30        243              0.209208      23.978394      11.476355       0.305275   -9999.000000   -9999.000000       0.128000       0.570000
53929     53929     shaanxi        107.8000       35.2000           99       151     2012      08        31        244              0.278958      24.311462      46.711895       0.315437       0.180000       0.198500       0.161600   -9999.000000
53929     53929     shaanxi        107.8000       35.2000           99       151     2012      09        01        245              0.288583      20.375153      15.448537       0.372919       0.156000   -9999.000000   -9999.000000   -9999.000000
53929     53929     shaanxi        107.8000       35.2000           99       151     2012      09        02        246              0.273875      17.020142       0.284096       0.379633       0.144000   -9999.000000       0.144500       0.947000
53929     53929     shaanxi        107.8000       35.2000           99       151     2012      09        03        247              0.265792      19.878601       0.000000       0.351146   -9999.000000   -9999.000000       0.105900   -9999.000000
53929     53929     shaanxi        107.8000       35.2000           99       151     2012      09        04        248              0.256750      20.854034       0.000000       0.340101       0.139000   -9999.000000       0.090900       0.765000
53929     53929     shaanxi        107.8000       35.2000           99       151     2012      09        05        249              0.249000      21.573547       0.000000       0.333005       0.126500       0.298000       0.093300   -9999.000000
53929     53929     shaanxi        107.8000       35.2000           99       151     2012      09        06        250              0.241417      22.732391       0.000000       0.327620       0.121000   -9999.000000   -9999.000000       0.721000
53929     53929     shaanxi        107.8000       35.2000           99       151     2012      09        07        251              0.244458      22.921967       6.977776       0.323052       0.145000   -9999.000000       0.111100       1.000000
53929     53929     shaanxi        107.8000       35.2000           99       151     2012      09        08        252              0.254125      21.220642       0.426191       0.337487       0.156000   -9999.000000       0.087900   -9999.000000
53929     53929     shaanxi        107.8000       35.2000           99       151     2012      09        09        253              0.250042      21.683990       3.820493       0.329910       0.142000   -9999.000000       0.107900       0.813000
53929     53929     shaanxi        107.8000       35.2000           99       151     2012      09        10        254              0.293250      20.188446      35.303684       0.330100       0.154000       0.075600       0.163300   -9999.000000
53929     53929     shaanxi        107.8000       35.2000           99       151     2012      09        11        255              0.278167      18.171478       0.000000       0.381877       0.163000   -9999.000000       0.158200       1.000000
53929     53929     shaanxi        107.8000       35.2000           99       151     2012      09        12        256              0.269042      19.158356       0.000000       0.349258       0.147000       0.235300   -9999.000000       0.867000
53929     53929     shaanxi        107.8000       35.2000           99       151     2012      09        13        257              0.262417      15.566223       0.000000       0.339560       0.137000       0.077700       0.140000       0.789000
53929     53929     shaanxi        107.8000       35.2000           99       151     2012      09        14        258              0.255042      16.431793       0.000000       0.332330       0.149000   -9999.000000       0.143400       0.606000
53929     53929     shaanxi        107.8000       35.2000           99       151     2012      09        15        259              0.257167      17.408356       6.397134       0.326490       0.179000       0.131500       0.139900   -9999.000000
53929     53929     shaanxi        107.8000       35.2000           99       151     2012      09        16        260              0.268292      15.922668       2.361073       0.340237       0.168500   -9999.000000       0.158900       0.902000
53929     53929     shaanxi        107.8000       35.2000           99       151     2012      09        17        261              0.266333      14.932129       0.387532       0.340381       0.149500   -9999.000000   -9999.000000       0.801000
53929     53929     shaanxi        107.8000       35.2000           99       151     2012      09        18        262              0.259417      17.906433       0.000000       0.330813       0.147000       0.112000   -9999.000000       0.738000
53929     53929     shaanxi        107.8000       35.2000           99       151     2012      09        19        263              0.250792      18.146698       0.708456       0.324625   -9999.000000   -9999.000000       0.107200       0.595000
53929     53929     shaanxi        107.8000       35.2000           99       151     2012      09        20        264              0.256833      19.136658      11.410791       0.321154       0.185000       0.058400       0.147300   -9999.000000
53929     53929     shaanxi        107.8000       35.2000           99       151     2012      09        21        265              0.265083      16.899658       0.000000       0.345754   -9999.000000   -9999.000000       0.128600       0.792000
53929     53929     shaanxi        107.8000       35.2000           99       151     2012      09        22        266              0.260208      19.154358       0.000000       0.332962       0.126500   -9999.000000       0.132900   -9999.000000
53929     53929     shaanxi        107.8000       35.2000           99       151     2012      09        23        267              0.255958      18.776520       0.000000       0.327141       0.139000       0.269800   -9999.000000       0.636000
53929     53929     shaanxi        107.8000       35.2000           99       151     2012      09        24        268              0.259333      18.941437      23.152060       0.323569       0.160000   -9999.000000       0.131300       0.830000
53929     53929     shaanxi        107.8000       35.2000           99       151     2012      09        25        269              0.288875      17.664246      14.025618       0.348194       0.158000       0.071100       0.110600   -9999.000000
53929     53929     shaanxi        107.8000       35.2000           99       151     2012      09        26        270              0.279083      14.499329       0.000000       0.372093       0.152000   -9999.000000       0.128600       0.910000
53929     53929     shaanxi        107.8000       35.2000           99       151     2012      09        27        271              0.273714      17.703613       0.000000       0.347871       0.144000       0.082600       0.111700   -9999.000000
53929     53929     shaanxi        107.8000       35.2000           99       151     2012      09        28        272              0.261667      16.057983       0.046174       0.337954       0.136000   -9999.000000       0.113100       0.624000
53929     53929     shaanxi        107.8000       35.2000           99       151     2012      09        29        273              0.258125      13.705811       0.000000       0.332208       0.132000   -9999.000000   -9999.000000   -9999.000000
53929     53929     shaanxi        107.8000       35.2000           99       151     2012      09        30        274              0.252375      15.607544       0.077727       0.328235   -9999.000000   -9999.000000       0.108200   -9999.000000
53929     53929     shaanxi        107.8000       35.2000           99       151     2012      10        01        275              0.246208      16.708893       0.000000       0.324240       0.130000   -9999.000000       0.126000       0.661000
53929     53929     shaanxi        107.8000       35.2000           99       151     2012      10        02        276              0.248000      17.629608       3.997863       0.320539       0.140000   -9999.000000       0.115700   -9999.000000
53929     53929     shaanxi        107.8000       35.2000           99       151     2012      10        03        277              0.252458      15.201843       0.057186       0.331213       0.118000       0.129400       0.125200       0.652000
53929     53929     shaanxi        107.8000       35.2000           99       151     2012      10        04        278              0.250708      16.496155       0.352195       0.325546       0.143000   -9999.000000   -9999.000000   -9999.000000
53929     53929     shaanxi        107.8000       35.2000           99       151     2012      10        05        279              0.247833      14.491364       0.000000       0.323056       0.126000   -9999.000000   -9999.000000       0.607000
53929     53929     shaanxi        107.8000       35.2000           99       151     2012      10        06        280              0.245250      15.508514       0.835316       0.318706       0.130000       0.130700       0.110500       0.736000
53929     53929     shaanxi        107.8000       35.2000           99       151     2012      10        07        281              0.243625      14.713928       0.000000       0.317374       0.137000   -9999.000000       0.126700   -9999.000000
53929     53929     shaanxi        107.8000       35.2000           99       151     2012      10        08        282              0.244458      14.818207       0.248569       0.316643       0.125000   -9999.000000       0.099700       0.624000
53929     53929     shaanxi        107.8000       35.2000           99       151     2012      10        09        283              0.242583      13.304779       0.000000       0.316477       0.115500   -9999.000000       0.099100   -9999.000000
53929     53929     shaanxi        107.8000       35.2000           99       151     2012      10        10        284              0.236292      14.567932       0.000000       0.311894       0.118000       0.089200   -9999.000000       0.578000
53929     53929     shaanxi        107.8000       35.2000           99       151     2012      10        11        285              0.231208      15.345337       0.000000       0.308925       0.117000   -9999.000000       0.096000       0.658000
53929     53929     shaanxi        107.8000       35.2000           99       151     2012      10        12        286              0.227750      16.539307       0.000000       0.307319       0.111000   -9999.000000       0.083500       0.571000
53929     53929     shaanxi        107.8000       35.2000           99       151     2012      10        13        287              0.220708      15.321686       0.000000       0.305918       0.100500       0.037400       0.099600       0.522000
53929     53929     shaanxi        107.8000       35.2000           99       151     2012      10        14        288              0.217083      15.648773       0.000000       0.302649       0.113500   -9999.000000       0.100700   -9999.000000
53929     53929     shaanxi        107.8000       35.2000           99       151     2012      10        15        289              0.217167      14.047516       0.806886       0.304068       0.134000   -9999.000000       0.131900       0.502000
53929     53929     shaanxi        107.8000       35.2000           99       151     2012      10        16        290              0.215042      12.564545       0.000000       0.306895   -9999.000000       0.102800   -9999.000000       0.572000
53929     53929     shaanxi        107.8000       35.2000           99       151     2012      10        17        291              0.209292      10.727997       0.000000       0.302612       0.120000   -9999.000000       0.121300       0.552000
53929     53929     shaanxi        107.8000       35.2000           99       151     2012      10        18        292              0.216833      11.828064       9.408313       0.299502       0.143000   -9999.000000       0.143900       0.793000
53929     53929     shaanxi        107.8000       35.2000           99       151     2012      10        19        293              0.224417       8.586395       0.000000       0.332903       0.120000   -9999.000000       0.131500   -9999.000000
53929     53929     shaanxi        107.8000       35.2000           99       151     2012      10        20        294              0.222875      11.781799       0.000000       0.318727       0.122000   -9999.000000       0.139900       0.740000
53929     53929     shaanxi        107.8000       35.2000           99       151     2012      10        21        295              0.218708      13.934967       0.101930       0.314225       0.174000       0.097400   -9999.000000   -9999.000000
53929     53929     shaanxi        107.8000       35.2000           99       151     2012      10        22        296              0.214167       8.048798       0.000000       0.312291   -9999.000000   -9999.000000       0.128600       0.536000
53929     53929     shaanxi        107.8000       35.2000           99       151     2012      10        23        297              0.212958      10.187042       0.316281       0.308540   -9999.000000   -9999.000000       0.097400       0.520000
53929     53929     shaanxi        107.8000       35.2000           99       151     2012      10        24        298              0.211625       8.161957       0.000000       0.310046   -9999.000000       0.114400       0.129300   -9999.000000
53929     53929     shaanxi        107.8000       35.2000           99       151     2012      10        25        299              0.000000       9.409607       0.000000       0.306813       0.144500   -9999.000000       0.117700       0.576000
53929     53929     shaanxi        107.8000       35.2000           99       151     2012      10        26        300              0.204292      11.436981       0.000000       0.304795       0.147000       0.028200       0.124000   -9999.000000
53929     53929     shaanxi        107.8000       35.2000           99       151     2012      10        27        301              0.199250      12.504700       0.000000       0.302632   -9999.000000   -9999.000000   -9999.000000       0.518000
53929     53929     shaanxi        107.8000       35.2000           99       151     2012      10        28        302              0.000000      12.423553       1.689074       0.300558       0.149000       0.163100       0.119800   -9999.000000
53929     53929     shaanxi        107.8000       35.2000           99       151     2012      10        29        303              0.197042       9.660645       0.000000       0.302390       0.129000       0.173200       0.112300   -9999.000000
53929     53929     shaanxi        107.8000       35.2000           99       151     2012      10        30        304              0.193042      10.211395       0.000000       0.299551       0.123000   -9999.000000       0.105500       0.497000
53929     53929     shaanxi        107.8000       35.2000           99       151     2012      10        31        305              0.189625       9.014130       0.000000       0.297531       0.154000       0.013000       0.120100   -9999.000000
53929     53929     shaanxi        107.8000       35.2000           99       151     2012      11        01        306              0.187625       8.858978       0.000000       0.296256       0.128000   -9999.000000   -9999.000000       0.491000
53929     53929     shaanxi        107.8000       35.2000           99       151     2012      11        02        307              0.185625       9.732574       0.394036       0.296421   -9999.000000   -9999.000000   -9999.000000   -9999.000000
53929     53929     shaanxi        107.8000       35.2000           99       151     2012      11        03        308              0.181458       9.828125       2.123173       0.295696   -9999.000000       0.167800       0.105900       0.403000
53929     53929     shaanxi        107.8000       35.2000           99       151     2012      11        04        309              0.179458       3.924194       0.130596       0.278995       0.118000   -9999.000000       0.122900       0.352000
53929     53929     shaanxi        107.8000       35.2000           99       151     2012      11        05        310              0.178792       3.839508       0.000000       0.277267       0.116000       0.044200       0.105500   -9999.000000
53929     53929     shaanxi        107.8000       35.2000           99       151     2012      11        06        311              0.179125       4.981140       0.073460       0.284800       0.135000   -9999.000000       0.118100       0.430000
53929     53929     shaanxi        107.8000       35.2000           99       151     2012      11        07        312              0.179792       6.582458       0.765025       0.292422   -9999.000000   -9999.000000   -9999.000000   -9999.000000
53929     53929     shaanxi        107.8000       35.2000           99       151     2012      11        08        313              0.180042       4.743805       0.000000       0.294749       0.140000       0.091300       0.128000       0.305000
53929     53929     shaanxi        107.8000       35.2000           99       151     2012      11        09        314              0.180625       6.796204       0.729098       0.294817       0.158000   -9999.000000       0.094900       0.702000
53929     53929     shaanxi        107.8000       35.2000           99       151     2012      11        10        315              0.180500       4.882660       0.999471       0.299924       0.129000   -9999.000000       0.118900       0.496000
53929     53929     shaanxi        107.8000       35.2000           99       151     2012      11        11        316              0.178583       3.371307       0.000000       0.273773       0.142000   -9999.000000       0.110000       0.314000
53929     53929     shaanxi        107.8000       35.2000           99       151     2012      11        12        317              0.178667       3.734406       0.000000       0.279751   -9999.000000   -9999.000000       0.099000   -9999.000000
53929     53929     shaanxi        107.8000       35.2000           99       151     2012      11        13        318              0.000000       5.518188       0.000000       0.290171   -9999.000000       0.112900   -9999.000000       0.328000
53929     53929     shaanxi        107.8000       35.2000           99       151     2012      11        14        319              0.177792       6.319183       0.000000       0.291173       0.140000   -9999.000000       0.101900       0.461000
53929     53929     shaanxi        107.8000       35.2000           99       151     2012      11        15        320              0.178625       5.403046       0.155304       0.293352   -9999.000000   -9999.000000       0.102200       0.669000
53929     53929     shaanxi        107.8000       35.2000           99       151     2012      11        16        321              0.179042       3.293304       0.000000       0.293748       0.151000       0.197900       0.089300       0.347000
53929     53929     shaanxi        107.8000       35.2000           99       151     2012      11        17        322              0.000000       5.320770       0.000000       0.291823       0.141000   -9999.000000       0.101300   -9999.000000
53929     53929     shaanxi        107.8000       35.2000           99       151     2012      11        18        323              0.177750       6.797485       0.000000       0.293100   -9999.000000       0.082300   -9999.000000       0.332000
53929     53929     shaanxi        107.8000       35.2000           99       151     2012      11        19        324              0.177500       5.444397       0.000000       0.290855       0.145000   -9999.000000   -9999.000000   -9999.000000
53929     53929     shaanxi        107.8000       35.2000           99       151     2012      11        20        325              0.178000       5.199005       0.000000       0.292397       0.124000   -9999.000000       0.073000       0.363000
53929     53929     shaanxi        107.8000       35.2000           99       151     2012      11        21        326              0.177792       5.238495       0.000000       0.293824       0.125000       0.079500       0.098000       0.309000
53929     53929     shaanxi        107.8000       35.2000           99       151     2012      11        22        327              0.176250       6.137146       0.000000       0.293863       0.123000   -9999.000000       0.083300   -9999.000000
53929     53929     shaanxi        107.8000       35.2000           99       151     2012      11        23        328              0.174833       2.816437       0.000000       0.276102   -9999.000000       0.013100       0.091200       0.273000
53929     53929     shaanxi        107.8000       35.2000           99       151     2012      11        24        329              0.174250       2.675568       0.079641       0.255859   -9999.000000   -9999.000000   -9999.000000   -9999.000000
53929     53929     shaanxi        107.8000       35.2000           99       151     2012      11        25        330              0.174250       0.808563       0.000000       0.249822       0.120000   -9999.000000       0.088400       0.223000
53929     53929     shaanxi        107.8000       35.2000           99       151     2012      11        26        331              0.171417       1.153473       0.000000       0.241342       0.117000       0.034100   -9999.000000   -9999.000000
53929     53929     shaanxi        107.8000       35.2000           99       151     2012      11        27        332              0.169625       1.522247       0.000000       0.239306       0.132000   -9999.000000       0.085200   -9999.000000
53929     53929     shaanxi        107.8000       35.2000           99       151     2012      11        28        333              0.163000       1.690338       0.000000       0.244175       0.130000   -9999.000000       0.083300       0.178000
53929     53929     shaanxi        107.8000       35.2000           99       151     2012      11        29        334              0.145542       0.115417       0.000000       0.222495   -9999.000000       0.020400       0.082000   -9999.000000
53929     53929     shaanxi        107.8000       35.2000           99       151     2012      11        30        335              0.138167      -0.703522       0.069824       0.203638   -9999.000000   -9999.000000   -9999.000000       0.288000
53929     53929     shaanxi        107.8000       35.2000           99       151     2012      12        01        336              0.155500       0.231628       0.278934       0.215584       0.122000       0.211400       0.080900   -9999.000000
53929     53929     shaanxi        107.8000       35.2000           99       151     2012      12        02        337              0.159958       1.115540       0.000000       0.235427       0.118000   -9999.000000       0.085500       0.110000
53929     53929     shaanxi        107.8000       35.2000           99       151     2012      12        03        338              0.155500       1.916016       0.000000       0.245313       0.129000       0.173000       0.078700       0.234000
53929     53929     shaanxi        107.8000       35.2000           99       151     2012      12        04        339              0.150292       1.511047       0.000000       0.240135   -9999.000000       0.137700       0.088600   -9999.000000
53929     53929     shaanxi        107.8000       35.2000           99       151     2012      12        05        340              0.152417       2.130463       0.000000       0.251081   -9999.000000   -9999.000000   -9999.000000       0.208000
53929     53929     shaanxi        107.8000       35.2000           99       151     2012      12        06        341              0.157417       1.867645       0.000000       0.244366       0.113000       0.011800       0.091200   -9999.000000
53929     53929     shaanxi        107.8000       35.2000           99       151     2012      12        07        342              0.162375       2.600250       0.000000       0.259011       0.110000   -9999.000000       0.057800       0.116000
53929     53929     shaanxi        107.8000       35.2000           99       151     2012      12        08        343              0.148958       2.282867       0.000000       0.249776       0.128000       0.096900       0.090500       0.128000
53929     53929     shaanxi        107.8000       35.2000           99       151     2012      12        09        344              0.129375       0.680939       0.000000       0.226772   -9999.000000       0.084800       0.078600       0.106000
53929     53929     shaanxi        107.8000       35.2000           99       151     2012      12        10        345              0.122708      -0.089813       0.000000       0.212968   -9999.000000   -9999.000000       0.074100       0.088000
53929     53929     shaanxi        107.8000       35.2000           99       151     2012      12        11        346              0.120292       0.778595       0.000000       0.226245       0.101000   -9999.000000   -9999.000000   -9999.000000
53929     53929     shaanxi        107.8000       35.2000           99       151     2012      12        12        347              0.122875       0.336761       0.000000       0.220591       0.106000   -9999.000000       0.076900       0.079000
53929     53929     shaanxi        107.8000       35.2000           99       151     2012      12        13        348              0.125542       0.538605       0.000000       0.221888   -9999.000000   -9999.000000       0.069900       0.169000
53929     53929     shaanxi        107.8000       35.2000           99       151     2012      12        14        349              0.126917      -0.475159       0.000000       0.201235       0.114000       0.025900       0.083400       0.136000
53929     53929     shaanxi        107.8000       35.2000           99       151     2012      12        15        350              0.000000       0.112823       0.000000       0.214043   -9999.000000   -9999.000000       0.078700       0.113000
53929     53929     shaanxi        107.8000       35.2000           99       151     2012      12        16        351              0.132083      -0.340790       0.000000       0.197304   -9999.000000   -9999.000000       0.076000   -9999.000000
53929     53929     shaanxi        107.8000       35.2000           99       151     2012      12        17        352              0.132458      -0.266754       0.000000       0.202318       0.102000   -9999.000000   -9999.000000       0.052000
53929     53929     shaanxi        107.8000       35.2000           99       151     2012      12        18        353              0.121000      -0.662018       0.000000       0.204175       0.100000   -9999.000000       0.065500   -9999.000000
53929     53929     shaanxi        107.8000       35.2000           99       151     2012      12        19        354              0.122417      -0.467621       0.000000       0.204961       0.113000   -9999.000000       0.077200       0.145000
53929     53929     shaanxi        107.8000       35.2000           99       151     2012      12        20        355              0.000000      -0.562347       1.049971       0.197015   -9999.000000   -9999.000000       0.062400       0.025000
53929     53929     shaanxi        107.8000       35.2000           99       151     2012      12        21        356              0.118750      -1.731598       0.042275       0.181001   -9999.000000       0.162300       0.070400   -9999.000000
53929     53929     shaanxi        107.8000       35.2000           99       151     2012      12        22        357              0.109333      -2.045532       0.000000       0.179364   -9999.000000   -9999.000000   -9999.000000       0.042000
53929     53929     shaanxi        107.8000       35.2000           99       151     2012      12        23        358              0.099708      -4.807343       0.000000       0.159610       0.093000   -9999.000000       0.075300   -9999.000000
53929     53929     shaanxi        107.8000       35.2000           99       151     2012      12        24        359              0.098611      -4.558594       0.000000       0.158149       0.104000       0.110100       0.050000       0.061000
53929     53929     shaanxi        107.8000       35.2000           99       151     2012      12        25        360              0.098958      -2.718994       0.000000       0.173168       0.103000   -9999.000000       0.076600   -9999.000000
53929     53929     shaanxi        107.8000       35.2000           99       151     2012      12        26        361              0.000000      -2.912506       0.000000       0.172330   -9999.000000   -9999.000000       0.066800   -9999.000000
53929     53929     shaanxi        107.8000       35.2000           99       151     2012      12        27        362              0.098364      -3.591980       0.000000       0.163746   -9999.000000       0.055200       0.071700       0.010000
53929     53929     shaanxi        107.8000       35.2000           99       151     2012      12        28        363              0.000000      -2.981812       0.118197       0.169470   -9999.000000   -9999.000000   -9999.000000   -9999.000000
53929     53929     shaanxi        107.8000       35.2000           99       151     2012      12        29        364              0.000000      -4.204834       0.000000       0.156112   -9999.000000   -9999.000000       0.068100   -9999.000000
53929     53929     shaanxi        107.8000       35.2000           99       151     2012      12        30        365              0.000000      -6.865204       0.000000       0.143361       0.099000   -9999.000000       0.074400   -9999.000000
53929     53929     shaanxi        107.8000       35.2000           99       151     2012      12        31        366              0.091667      -4.523529       0.000000       0.158855   -9999.000000       0.531400       0.061600   -9999.000000
