# Supplementary material for: Research on Fusing Multisatellite Soil Moisture Data Based on Bayesian Model Averaging
Source: Hindawi journal article supplement (doi:10.1155/2018/9310838), 2018-06-25
Supplement: f1 [file 9310838.f1.zip › 2012_sm00-10cm_daily_ZDB_ZHY_53937_366days_allin.txt]

53937     53937     gansu          107.9200       35.5100           98       152     2012      01        01        001              0.000000   -9999.000000       0.000000   -9999.000000       0.079000   -9999.000000       0.050300   -9999.000000
53937     53937     gansu          107.9200       35.5100           98       152     2012      01        02        002              0.044958      -1.535706       0.000000       0.189890       0.085000   -9999.000000   -9999.000000   -9999.000000
53937     53937     gansu          107.9200       35.5100           98       152     2012      01        03        003              0.000000      -1.839569       0.000000       0.184385   -9999.000000   -9999.000000       0.053000   -9999.000000
53937     53937     gansu          107.9200       35.5100           98       152     2012      01        04        004              0.037333      -4.752869      74.070358       0.159236   -9999.000000   -9999.000000       0.059400   -9999.000000
53937     53937     gansu          107.9200       35.5100           98       152     2012      01        05        005              0.038625      -4.348328       0.000000       0.158887       0.080000   -9999.000000       0.047200       0.005000
53937     53937     gansu          107.9200       35.5100           98       152     2012      01        06        006              0.039000      -4.356689       0.000000       0.159049   -9999.000000   -9999.000000       0.058500       0.087000
53937     53937     gansu          107.9200       35.5100           98       152     2012      01        07        007              0.043696      -2.816956       0.000000       0.165619       0.091000       0.070200       0.055800   -9999.000000
53937     53937     gansu          107.9200       35.5100           98       152     2012      01        08        008              0.000000      -1.926544       0.000000       0.185364       0.084000   -9999.000000   -9999.000000   -9999.000000
53937     53937     gansu          107.9200       35.5100           98       152     2012      01        09        009              0.041542      -1.834778       2.100240       0.187237   -9999.000000   -9999.000000   -9999.000000       0.003000
53937     53937     gansu          107.9200       35.5100           98       152     2012      01        10        010              0.041208      -0.876862       0.000000       0.198516       0.079000       0.063800       0.047500   -9999.000000
53937     53937     gansu          107.9200       35.5100           98       152     2012      01        11        011              0.039870      -1.579651       0.000000       0.191933       0.075000   -9999.000000       0.039400       0.005000
53937     53937     gansu          107.9200       35.5100           98       152     2012      01        12        012              0.040750      -1.901581       0.000000       0.185979       0.085000   -9999.000000       0.045500   -9999.000000
53937     53937     gansu          107.9200       35.5100           98       152     2012      01        13        013              0.040917      -1.254547       0.000000       0.193463       0.081000   -9999.000000   -9999.000000   -9999.000000
53937     53937     gansu          107.9200       35.5100           98       152     2012      01        14        014              0.041417      -1.065216       0.000000       0.195509   -9999.000000   -9999.000000       0.048500       0.026000
53937     53937     gansu          107.9200       35.5100           98       152     2012      01        15        015              0.038696      -1.384918       0.000000       0.193741   -9999.000000   -9999.000000       0.032400   -9999.000000
53937     53937     gansu          107.9200       35.5100           98       152     2012      01        16        016              0.039375      -1.450439       0.000000       0.190891       0.064000   -9999.000000       0.045000       0.032000
53937     53937     gansu          107.9200       35.5100           98       152     2012      01        17        017              0.000000      -1.653992       0.000000       0.180355       0.069000   -9999.000000       0.037800   -9999.000000
53937     53937     gansu          107.9200       35.5100           98       152     2012      01        18        018              0.043125      -0.232117       0.000000       0.204511       0.085000   -9999.000000       0.042200   -9999.000000
53937     53937     gansu          107.9200       35.5100           98       152     2012      01        19        019              0.044917      -0.158051       0.000000       0.205187   -9999.000000   -9999.000000   -9999.000000       0.026000
53937     53937     gansu          107.9200       35.5100           98       152     2012      01        20        020              0.047708      -0.858032       0.183723       0.190834   -9999.000000       0.046700       0.040000   -9999.000000
53937     53937     gansu          107.9200       35.5100           98       152     2012      01        21        021              0.049125      -1.542786       0.000000       0.187502   -9999.000000   -9999.000000       0.040400       0.081000
53937     53937     gansu          107.9200       35.5100           98       152     2012      01        22        022              0.047087      -5.180267       0.000000       0.152035   -9999.000000   -9999.000000       0.031300   -9999.000000
53937     53937     gansu          107.9200       35.5100           98       152     2012      01        23        023              0.043348      -7.604156       0.000000       0.139973   -9999.000000       0.067400       0.034500   -9999.000000
53937     53937     gansu          107.9200       35.5100           98       152     2012      01        24        024              0.040583      -8.096375       0.000000       0.137195   -9999.000000   -9999.000000   -9999.000000       0.006000
53937     53937     gansu          107.9200       35.5100           98       152     2012      01        25        025              0.038750      -8.279449       0.151787       0.136522   -9999.000000   -9999.000000   -9999.000000       0.016000
53937     53937     gansu          107.9200       35.5100           98       152     2012      01        26        026              0.039083      -5.779419       0.140541       0.147157   -9999.000000   -9999.000000       0.025600       0.026000
53937     53937     gansu          107.9200       35.5100           98       152     2012      01        27        027              0.039417      -3.220459       0.115730       0.171438       0.081000   -9999.000000       0.037200   -9999.000000
53937     53937     gansu          107.9200       35.5100           98       152     2012      01        28        028              0.040750      -1.786682       0.113425       0.185880       0.096000   -9999.000000       0.034800       0.141000
53937     53937     gansu          107.9200       35.5100           98       152     2012      01        29        029              0.042000      -0.320709       0.000000       0.202827       0.092000   -9999.000000       0.041300       0.104000
53937     53937     gansu          107.9200       35.5100           98       152     2012      01        30        030              0.041667      -0.082642       0.000000       0.208616   -9999.000000   -9999.000000   -9999.000000       0.140000
53937     53937     gansu          107.9200       35.5100           98       152     2012      01        31        031              0.041292       0.017670       0.000000       0.209542   -9999.000000   -9999.000000       0.041000       0.124000
53937     53937     gansu          107.9200       35.5100           98       152     2012      02        01        032              0.041542       1.110718       0.000000       0.223900       0.082000   -9999.000000       0.029900   -9999.000000
53937     53937     gansu          107.9200       35.5100           98       152     2012      02        02        033              0.041000      -0.148376       0.000000       0.208535       0.083000   -9999.000000       0.043400       0.028000
53937     53937     gansu          107.9200       35.5100           98       152     2012      02        03        034              0.039958      -1.295776       0.000000       0.196000       0.091000   -9999.000000       0.047400       0.140000
53937     53937     gansu          107.9200       35.5100           98       152     2012      02        04        035              0.042792       0.306549       0.000000       0.209794   -9999.000000   -9999.000000       0.052700       0.159000
53937     53937     gansu          107.9200       35.5100           98       152     2012      02        05        036              0.043875       0.847565       0.000000       0.219033   -9999.000000   -9999.000000   -9999.000000       0.087000
53937     53937     gansu          107.9200       35.5100           98       152     2012      02        06        037              0.043043       1.626587       0.000000       0.227275       0.074000   -9999.000000       0.039200   -9999.000000
53937     53937     gansu          107.9200       35.5100           98       152     2012      02        07        038              0.036833      -1.851318       0.000000       0.195313   -9999.000000       0.101300       0.044100       0.080000
53937     53937     gansu          107.9200       35.5100           98       152     2012      02        08        039              0.037167      -3.364655       0.000000       0.170236   -9999.000000   -9999.000000       0.038000   -9999.000000
53937     53937     gansu          107.9200       35.5100           98       152     2012      02        09        040              0.037773      -4.068390       0.000000       0.159267   -9999.000000   -9999.000000       0.042000       0.069000
53937     53937     gansu          107.9200       35.5100           98       152     2012      02        10        041              0.037500      -4.458069       0.199390       0.155367   -9999.000000       0.051400   -9999.000000   -9999.000000
53937     53937     gansu          107.9200       35.5100           98       152     2012      02        11        042              0.037750      -2.581360       0.000000       0.182169       0.072000   -9999.000000   -9999.000000   -9999.000000
53937     53937     gansu          107.9200       35.5100           98       152     2012      02        12        043              0.041783      -1.168579       0.179340       0.188503   -9999.000000   -9999.000000   -9999.000000       0.091000
53937     53937     gansu          107.9200       35.5100           98       152     2012      02        13        044              0.042208      -0.670563       0.000000       0.200920       0.095000   -9999.000000       0.016900   -9999.000000
53937     53937     gansu          107.9200       35.5100           98       152     2012      02        14        045              0.044125      -0.185516       0.220235       0.203833       0.091000   -9999.000000   -9999.000000       0.266000
53937     53937     gansu          107.9200       35.5100           98       152     2012      02        15        046              0.050083       1.668518       0.028504       0.228192   -9999.000000   -9999.000000       0.053300   -9999.000000
53937     53937     gansu          107.9200       35.5100           98       152     2012      02        16        047              0.047348       0.923950       0.000000       0.223198       0.081000   -9999.000000   -9999.000000       0.070000
53937     53937     gansu          107.9200       35.5100           98       152     2012      02        17        048              0.044542       0.360870       0.000000       0.211080       0.075000       0.203600       0.042700       0.011000
53937     53937     gansu          107.9200       35.5100           98       152     2012      02        18        049              0.042667      -0.805664       0.000000       0.197355       0.089000   -9999.000000       0.031700   -9999.000000
53937     53937     gansu          107.9200       35.5100           98       152     2012      02        19        050              0.042958      -0.261841       0.000000       0.203588       0.085000   -9999.000000       0.047600       0.120000
53937     53937     gansu          107.9200       35.5100           98       152     2012      02        20        051              0.046500       1.538696       0.000000       0.220369   -9999.000000       0.024800       0.051200   -9999.000000
53937     53937     gansu          107.9200       35.5100           98       152     2012      02        21        052              0.050708       1.432037       0.000000       0.224722   -9999.000000   -9999.000000   -9999.000000       0.020000
53937     53937     gansu          107.9200       35.5100           98       152     2012      02        22        053              0.057333       3.467194       0.000000       0.241542       0.070000   -9999.000000   -9999.000000       0.280000
53937     53937     gansu          107.9200       35.5100           98       152     2012      02        23        054              0.061917       3.114227       0.000000       0.245453       0.073000       0.005500       0.043700       0.227000
53937     53937     gansu          107.9200       35.5100           98       152     2012      02        24        055              0.064250       1.355896       0.267273       0.235793       0.085000   -9999.000000       0.051700       0.178000
53937     53937     gansu          107.9200       35.5100           98       152     2012      02        25        056              0.064000       0.990387       0.000000       0.224638   -9999.000000       0.099200       0.047500   -9999.000000
53937     53937     gansu          107.9200       35.5100           98       152     2012      02        26        057              0.061958      -0.063293       0.092482       0.209635   -9999.000000   -9999.000000       0.057500       0.114000
53937     53937     gansu          107.9200       35.5100           98       152     2012      02        27        058              0.060250       0.661469       0.000000       0.216568       0.063000   -9999.000000   -9999.000000       0.149000
53937     53937     gansu          107.9200       35.5100           98       152     2012      02        28        059              0.060696       1.033051       0.000000       0.218113       0.074000       0.029200   -9999.000000       0.251000
53937     53937     gansu          107.9200       35.5100           98       152     2012      02        29        060              0.000000   -9999.000000       0.000000   -9999.000000       0.079000   -9999.000000   -9999.000000   -9999.000000
53937     53937     gansu          107.9200       35.5100           98       152     2012      03        01        061              0.070217       1.371338       0.103776       0.228489   -9999.000000   -9999.000000       0.052000   -9999.000000
53937     53937     gansu          107.9200       35.5100           98       152     2012      03        02        062              0.078136       2.131744       0.072876       0.245402       0.082000   -9999.000000       0.049600       0.246000
53937     53937     gansu          107.9200       35.5100           98       152     2012      03        03        063              0.087458       1.692627       0.600163       0.247749       0.086000   -9999.000000       0.056100       0.377000
53937     53937     gansu          107.9200       35.5100           98       152     2012      03        04        064              0.097042       1.353394       0.054462       0.244174   -9999.000000       0.019200   -9999.000000       0.481000
53937     53937     gansu          107.9200       35.5100           98       152     2012      03        05        065              0.116174       1.137604       0.253037       0.236235       0.105000   -9999.000000       0.048300       0.133000
53937     53937     gansu          107.9200       35.5100           98       152     2012      03        06        066              0.178773       2.537292       0.000000       0.243661       0.103000       0.044100       0.039600   -9999.000000
53937     53937     gansu          107.9200       35.5100           98       152     2012      03        07        067              0.000000       2.462891       0.000000       0.239555       0.083000   -9999.000000       0.050600       0.351000
53937     53937     gansu          107.9200       35.5100           98       152     2012      03        08        068              0.246043       3.723175       1.020603       0.256795   -9999.000000   -9999.000000       0.059500   -9999.000000
53937     53937     gansu          107.9200       35.5100           98       152     2012      03        09        069              0.262364       2.471588       0.445513       0.259833       0.095000       0.033400       0.071400       0.378000
53937     53937     gansu          107.9200       35.5100           98       152     2012      03        10        070              0.266292       2.773193       0.000000       0.257775       0.111000   -9999.000000   -9999.000000       0.498000
53937     53937     gansu          107.9200       35.5100           98       152     2012      03        11        071              0.269875       5.556244       0.000000       0.267113       0.098000   -9999.000000       0.049800   -9999.000000
53937     53937     gansu          107.9200       35.5100           98       152     2012      03        12        072              0.270545       6.448212       0.000000       0.271281   -9999.000000   -9999.000000       0.048100       0.444000
53937     53937     gansu          107.9200       35.5100           98       152     2012      03        13        073              0.270167       6.740204       0.000000       0.269549       0.077000   -9999.000000       0.056700   -9999.000000
53937     53937     gansu          107.9200       35.5100           98       152     2012      03        14        074              0.271500       9.444519       0.000000       0.269011       0.083000   -9999.000000   -9999.000000       0.443000
53937     53937     gansu          107.9200       35.5100           98       152     2012      03        15        075              0.274087       9.175507       0.264392       0.268224       0.085500   -9999.000000   -9999.000000   -9999.000000
53937     53937     gansu          107.9200       35.5100           98       152     2012      03        16        076              0.275818       5.639130       0.000000       0.273830       0.087000   -9999.000000       0.054900       0.631000
53937     53937     gansu          107.9200       35.5100           98       152     2012      03        17        077              0.275667       9.597015       0.000000       0.268286       0.085000       0.066400       0.032800       0.524000
53937     53937     gansu          107.9200       35.5100           98       152     2012      03        18        078              0.273522      11.493927       0.342445       0.263753       0.084000   -9999.000000       0.058900   -9999.000000
53937     53937     gansu          107.9200       35.5100           98       152     2012      03        19        079              0.270583      12.519989       0.438692       0.260334       0.077500   -9999.000000       0.061500       0.410000
53937     53937     gansu          107.9200       35.5100           98       152     2012      03        20        080              0.266458       8.401398       0.240457       0.267242       0.084000   -9999.000000       0.066500   -9999.000000
53937     53937     gansu          107.9200       35.5100           98       152     2012      03        21        081              0.263435       8.439697       0.477574       0.266584       0.106000   -9999.000000   -9999.000000       0.533000
53937     53937     gansu          107.9200       35.5100           98       152     2012      03        22        082              0.265083       5.127563       4.179671       0.272604   -9999.000000       0.029900       0.053000       0.565000
53937     53937     gansu          107.9200       35.5100           98       152     2012      03        23        083              0.260542       4.396667       0.000000       0.288458   -9999.000000   -9999.000000       0.041100       0.418000
53937     53937     gansu          107.9200       35.5100           98       152     2012      03        24        084              0.255083       6.857635       0.000000       0.270485       0.081000   -9999.000000       0.050100       0.267000
53937     53937     gansu          107.9200       35.5100           98       152     2012      03        25        085              0.000000       9.956848       0.000000       0.269062       0.073000   -9999.000000       0.056700   -9999.000000
53937     53937     gansu          107.9200       35.5100           98       152     2012      03        26        086              0.248792      11.351624       0.000000       0.262714       0.080000   -9999.000000       0.062700       0.311000
53937     53937     gansu          107.9200       35.5100           98       152     2012      03        27        087              0.246708      11.625824       0.100933       0.258169       0.077000       0.104000   -9999.000000       0.287000
53937     53937     gansu          107.9200       35.5100           98       152     2012      03        28        088              0.247250      14.464905       3.510659       0.252798       0.101000   -9999.000000       0.072000       0.320000
53937     53937     gansu          107.9200       35.5100           98       152     2012      03        29        089              0.250292       9.741516       0.302165       0.280671       0.092000   -9999.000000       0.074000       0.343000
53937     53937     gansu          107.9200       35.5100           98       152     2012      03        30        090              0.245917      12.970123       0.000000       0.272720       0.067000   -9999.000000       0.054400   -9999.000000
53937     53937     gansu          107.9200       35.5100           98       152     2012      03        31        091              0.243375       8.700958       0.167111       0.263699       0.070000   -9999.000000       0.061300       0.247000
53937     53937     gansu          107.9200       35.5100           98       152     2012      04        01        092              0.240875      12.929047       0.142244       0.255808       0.080000   -9999.000000   -9999.000000       0.187000
53937     53937     gansu          107.9200       35.5100           98       152     2012      04        02        093              0.238542      13.214539       2.642506       0.254092   -9999.000000   -9999.000000       0.065900       0.256000
53937     53937     gansu          107.9200       35.5100           98       152     2012      04        03        094              0.237125      10.357483       0.000000       0.251417       0.086000   -9999.000000       0.041100       0.076000
53937     53937     gansu          107.9200       35.5100           98       152     2012      04        04        095              0.235625      13.089783       0.000000       0.245195       0.071000   -9999.000000       0.061900   -9999.000000
53937     53937     gansu          107.9200       35.5100           98       152     2012      04        05        096              0.233250      15.399017       0.000000       0.238048       0.067000   -9999.000000       0.053100       0.151000
53937     53937     gansu          107.9200       35.5100           98       152     2012      04        06        097              0.231250      13.937531       0.263399       0.234777       0.073000   -9999.000000       0.057200   -9999.000000
53937     53937     gansu          107.9200       35.5100           98       152     2012      04        07        098              0.229958      13.719788       0.000000       0.233321   -9999.000000   -9999.000000   -9999.000000       0.113000
53937     53937     gansu          107.9200       35.5100           98       152     2012      04        08        099              0.228667      15.554504       0.000000       0.227084       0.075000   -9999.000000       0.057200   -9999.000000
53937     53937     gansu          107.9200       35.5100           98       152     2012      04        09        100              0.227042      17.670258      13.054621       0.220892       0.106000   -9999.000000       0.084100   -9999.000000
53937     53937     gansu          107.9200       35.5100           98       152     2012      04        10        101              0.232000      12.164825       0.000000       0.299658       0.093500   -9999.000000       0.082000       0.509000
53937     53937     gansu          107.9200       35.5100           98       152     2012      04        11        102              0.230833      16.003937       3.370364       0.285100       0.104000       0.222600       0.077800   -9999.000000
53937     53937     gansu          107.9200       35.5100           98       152     2012      04        12        103              0.232130      12.381042       0.041268       0.286703       0.108000   -9999.000000       0.074300       0.213000
53937     53937     gansu          107.9200       35.5100           98       152     2012      04        13        104              0.231750       9.722992       0.000000       0.282652       0.095000   -9999.000000   -9999.000000   -9999.000000
53937     53937     gansu          107.9200       35.5100           98       152     2012      04        14        105              0.229875      13.756256       0.834969       0.269624       0.086000   -9999.000000       0.053900       0.197000
53937     53937     gansu          107.9200       35.5100           98       152     2012      04        15        106              0.228542      15.529755       0.000000       0.261886       0.078000   -9999.000000       0.066400       0.192000
53937     53937     gansu          107.9200       35.5100           98       152     2012      04        16        107              0.226417      17.948273       0.000000       0.251690       0.081000   -9999.000000       0.060200   -9999.000000
53937     53937     gansu          107.9200       35.5100           98       152     2012      04        17        108              0.224083      17.611969       0.807011       0.245540       0.100000   -9999.000000       0.073500       0.223000
53937     53937     gansu          107.9200       35.5100           98       152     2012      04        18        109              0.223875      14.297485       0.000000       0.254891       0.090000   -9999.000000   -9999.000000   -9999.000000
53937     53937     gansu          107.9200       35.5100           98       152     2012      04        19        110              0.221208      18.484558       3.556012       0.244204       0.094000       0.039200       0.077100       0.072000
53937     53937     gansu          107.9200       35.5100           98       152     2012      04        20        111              0.220833      14.873962       0.000000       0.267763       0.076500   -9999.000000       0.046300       0.063000
53937     53937     gansu          107.9200       35.5100           98       152     2012      04        21        112              0.220375      16.352753       0.192507       0.258216       0.094500   -9999.000000       0.070800       0.190000
53937     53937     gansu          107.9200       35.5100           98       152     2012      04        22        113              0.219167      19.486755       0.081510       0.243201       0.089000   -9999.000000   -9999.000000       0.059000
53937     53937     gansu          107.9200       35.5100           98       152     2012      04        23        114              0.221083      21.998840       9.607422       0.232315       0.150000   -9999.000000       0.063000   -9999.000000
53937     53937     gansu          107.9200       35.5100           98       152     2012      04        24        115              0.236750      19.738586       0.000000       0.276576       0.128000   -9999.000000   -9999.000000       0.831000
53937     53937     gansu          107.9200       35.5100           98       152     2012      04        25        116              0.000000      16.135132       0.595964       0.272177       0.094500   -9999.000000       0.083900       0.178000
53937     53937     gansu          107.9200       35.5100           98       152     2012      04        26        117              0.227833      16.434326       0.000000       0.254792       0.093000   -9999.000000       0.083200       0.320000
53937     53937     gansu          107.9200       35.5100           98       152     2012      04        27        118              0.223833      19.078339       0.000000       0.241754       0.082000   -9999.000000       0.070500       0.095000
53937     53937     gansu          107.9200       35.5100           98       152     2012      04        28        119              0.220333      20.437164      10.719581       0.231255   -9999.000000   -9999.000000       0.058400   -9999.000000
53937     53937     gansu          107.9200       35.5100           98       152     2012      04        29        120              0.217174      21.129303       0.000000       0.277604       0.109000   -9999.000000       0.074000       0.106000
53937     53937     gansu          107.9200       35.5100           98       152     2012      04        30        121              0.214292      21.442291       0.000000       0.273573       0.116000   -9999.000000   -9999.000000       0.644000
53937     53937     gansu          107.9200       35.5100           98       152     2012      05        01        122              0.216667      18.665527       3.466858       0.265791       0.155500   -9999.000000       0.091500       0.772000
53937     53937     gansu          107.9200       35.5100           98       152     2012      05        02        123              0.230417      18.903961       2.178413       0.277547       0.152000   -9999.000000       0.111400       0.832000
53937     53937     gansu          107.9200       35.5100           98       152     2012      05        03        124              0.263083      18.230804       3.087087       0.287102       0.142000   -9999.000000       0.100700   -9999.000000
53937     53937     gansu          107.9200       35.5100           98       152     2012      05        04        125              0.263667      18.546631       0.000000       0.293052       0.137000   -9999.000000       0.091600       0.417000
53937     53937     gansu          107.9200       35.5100           98       152     2012      05        05        126              0.251833      21.432587       0.690883       0.273670       0.115000   -9999.000000   -9999.000000   -9999.000000
53937     53937     gansu          107.9200       35.5100           98       152     2012      05        06        127              0.265542      22.046509      17.216158       0.263356       0.121000   -9999.000000       0.117600       0.274000
53937     53937     gansu          107.9200       35.5100           98       152     2012      05        07        128              0.304522      18.313812       0.193572       0.296594   -9999.000000   -9999.000000       0.092700   -9999.000000
53937     53937     gansu          107.9200       35.5100           98       152     2012      05        08        129              0.283208      21.787231       1.722724       0.313643       0.103000   -9999.000000       0.114800   -9999.000000
53937     53937     gansu          107.9200       35.5100           98       152     2012      05        09        130              0.266708      22.845184       0.112408       0.299721   -9999.000000   -9999.000000       0.100000       0.426000
53937     53937     gansu          107.9200       35.5100           98       152     2012      05        10        131              0.261625      22.361237      14.156808       0.290505   -9999.000000   -9999.000000       0.095700   -9999.000000
53937     53937     gansu          107.9200       35.5100           98       152     2012      05        11        132              0.290542      23.069183       0.100313       0.305428       0.164500   -9999.000000   -9999.000000       0.550000
53937     53937     gansu          107.9200       35.5100           98       152     2012      05        12        133              0.268625      18.888092       0.000000       0.315972       0.133000       0.131000       0.101100   -9999.000000
53937     53937     gansu          107.9200       35.5100           98       152     2012      05        13        134              0.255667      16.558289       0.000000       0.297948       0.135000   -9999.000000       0.106000       0.494000
53937     53937     gansu          107.9200       35.5100           98       152     2012      05        14        135              0.247750      15.736786       0.063742       0.291303       0.142000   -9999.000000       0.110000       0.273000
53937     53937     gansu          107.9200       35.5100           98       152     2012      05        15        136              0.239087      18.453949       0.000000       0.280592       0.143000       0.069700       0.115600   -9999.000000
53937     53937     gansu          107.9200       35.5100           98       152     2012      05        16        137              0.232625      19.460754       0.000000       0.269907       0.110500   -9999.000000   -9999.000000       0.171000
53937     53937     gansu          107.9200       35.5100           98       152     2012      05        17        138              0.226708      20.248047       0.000000       0.260249       0.113500   -9999.000000   -9999.000000   -9999.000000
53937     53937     gansu          107.9200       35.5100           98       152     2012      05        18        139              0.223542      21.505371       0.396160       0.252552       0.110000   -9999.000000       0.092700       0.244000
53937     53937     gansu          107.9200       35.5100           98       152     2012      05        19        140              0.219737      23.460419       0.252766       0.246609   -9999.000000   -9999.000000       0.118200       0.300000
53937     53937     gansu          107.9200       35.5100           98       152     2012      05        20        141              0.215250      24.257660       1.328776       0.240979   -9999.000000   -9999.000000       0.106700       0.279000
53937     53937     gansu          107.9200       35.5100           98       152     2012      05        21        142              0.215375      21.893768       4.794432       0.244133       0.186500   -9999.000000       0.158100       0.733000
53937     53937     gansu          107.9200       35.5100           98       152     2012      05        22        143              0.222042      16.406250       0.135937       0.288885       0.144000   -9999.000000   -9999.000000   -9999.000000
53937     53937     gansu          107.9200       35.5100           98       152     2012      05        23        144              0.218750      18.389923       0.016524       0.271573   -9999.000000   -9999.000000       0.141900       0.404000
53937     53937     gansu          107.9200       35.5100           98       152     2012      05        24        145              0.215875      17.275543       0.000000       0.265320       0.135000   -9999.000000       0.124300       0.208000
53937     53937     gansu          107.9200       35.5100           98       152     2012      05        25        146              0.000000      16.357330       0.000000       0.262802       0.160000       0.095400       0.148000       0.312000
53937     53937     gansu          107.9200       35.5100           98       152     2012      05        26        147              0.213750      19.717529       0.917991       0.253890       0.140000   -9999.000000       0.128400       0.318000
53937     53937     gansu          107.9200       35.5100           98       152     2012      05        27        148              0.211125      22.647308       0.000000       0.241031       0.123500   -9999.000000       0.131600   -9999.000000
53937     53937     gansu          107.9200       35.5100           98       152     2012      05        28        149              0.211500      24.498749      13.241254       0.229448   -9999.000000       0.027000   -9999.000000       0.889000
53937     53937     gansu          107.9200       35.5100           98       152     2012      05        29        150              0.228958      18.130524       0.000000       0.293407       0.136000   -9999.000000       0.139200       0.313000
53937     53937     gansu          107.9200       35.5100           98       152     2012      05        30        151              0.222917      21.415436       0.459578       0.284375       0.146000       0.091100       0.141000   -9999.000000
53937     53937     gansu          107.9200       35.5100           98       152     2012      05        31        152              0.214958      22.061432       0.075866       0.268278       0.145000   -9999.000000       0.127800   -9999.000000
53937     53937     gansu          107.9200       35.5100           98       152     2012      06        01        153              0.213522      20.553436       0.315691       0.262934       0.113500   -9999.000000       0.128700   -9999.000000
53937     53937     gansu          107.9200       35.5100           98       152     2012      06        02        154              0.209500      22.863892       0.000000       0.249340       0.110500   -9999.000000   -9999.000000       0.380000
53937     53937     gansu          107.9200       35.5100           98       152     2012      06        03        155              0.205833      23.693420       0.246110       0.239454       0.110000   -9999.000000   -9999.000000   -9999.000000
53937     53937     gansu          107.9200       35.5100           98       152     2012      06        04        156              0.203167      23.235138       1.106324       0.233543   -9999.000000   -9999.000000       0.131800       0.376000
53937     53937     gansu          107.9200       35.5100           98       152     2012      06        05        157              0.199375      23.731781       5.077859       0.237078       0.161000   -9999.000000       0.184900       0.822000
53937     53937     gansu          107.9200       35.5100           98       152     2012      06        06        158              0.201375      19.974457       0.000000       0.272351       0.122500   -9999.000000       0.155300   -9999.000000
53937     53937     gansu          107.9200       35.5100           98       152     2012      06        07        159              0.200708      21.790863       0.187147       0.260590       0.108500   -9999.000000       0.154600       0.401000
53937     53937     gansu          107.9200       35.5100           98       152     2012      06        08        160              0.197083      23.903687       1.087102       0.242421       0.116000   -9999.000000   -9999.000000   -9999.000000
53937     53937     gansu          107.9200       35.5100           98       152     2012      06        09        161              0.197125      22.613464       0.000000       0.234966   -9999.000000   -9999.000000       0.150900       0.432000
53937     53937     gansu          107.9200       35.5100           98       152     2012      06        10        162              0.193417      26.094482       0.000000       0.219848       0.126000   -9999.000000       0.136100   -9999.000000
53937     53937     gansu          107.9200       35.5100           98       152     2012      06        11        163              0.000000      25.139954       0.306356       0.207469       0.105000   -9999.000000       0.195300       0.317000
53937     53937     gansu          107.9200       35.5100           98       152     2012      06        12        164              0.187458      25.479950       0.000000       0.196761       0.099000   -9999.000000       0.183200       0.414000
53937     53937     gansu          107.9200       35.5100           98       152     2012      06        13        165              0.184708      26.647583       0.308187       0.190578       0.107000   -9999.000000       0.177900   -9999.000000
53937     53937     gansu          107.9200       35.5100           98       152     2012      06        14        166              0.181083      28.254089       0.200788       0.183216       0.100000   -9999.000000   -9999.000000       0.358000
53937     53937     gansu          107.9200       35.5100           98       152     2012      06        15        167              0.178000      25.456360       0.000000       0.182330       0.115000   -9999.000000       0.169000   -9999.000000
53937     53937     gansu          107.9200       35.5100           98       152     2012      06        16        168              0.174917      26.497467       0.299068       0.179413       0.116000   -9999.000000       0.189000       0.304000
53937     53937     gansu          107.9200       35.5100           98       152     2012      06        17        169              0.172167      27.011383       0.000000       0.179221       0.105000   -9999.000000       0.170600       0.427000
53937     53937     gansu          107.9200       35.5100           98       152     2012      06        18        170              0.168739      28.051086       3.767675       0.177751       0.093000   -9999.000000       0.171200       0.407000
53937     53937     gansu          107.9200       35.5100           98       152     2012      06        19        171              0.166583      25.344147       0.262223       0.212629       0.113000   -9999.000000   -9999.000000       0.399000
53937     53937     gansu          107.9200       35.5100           98       152     2012      06        20        172              0.166000      24.796204       0.000000       0.214232       0.127000   -9999.000000       0.169100   -9999.000000
53937     53937     gansu          107.9200       35.5100           98       152     2012      06        21        173              0.163958      27.210968       3.664279       0.198540       0.125000   -9999.000000       0.134500       0.417000
53937     53937     gansu          107.9200       35.5100           98       152     2012      06        22        174              0.163250      27.701294       0.000000       0.212512       0.090500   -9999.000000       0.171800       0.564000
53937     53937     gansu          107.9200       35.5100           98       152     2012      06        23        175              0.164625      28.222900      10.747123       0.211616       0.097000   -9999.000000       0.154900       0.418000
53937     53937     gansu          107.9200       35.5100           98       152     2012      06        24        176              0.174083      28.360626       0.100163       0.239230       0.097000   -9999.000000       0.181200       0.599000
53937     53937     gansu          107.9200       35.5100           98       152     2012      06        25        177              0.173250      24.977936       0.482624       0.265830   -9999.000000       0.037700   -9999.000000   -9999.000000
53937     53937     gansu          107.9200       35.5100           98       152     2012      06        26        178              0.172125      24.197174       4.345909       0.251350       0.116000   -9999.000000       0.170900       0.554000
53937     53937     gansu          107.9200       35.5100           98       152     2012      06        27        179              0.171708      24.202728       0.441698       0.261663       0.121500       0.275100       0.165400       0.581000
53937     53937     gansu          107.9200       35.5100           98       152     2012      06        28        180              0.171792      22.998047      12.965435       0.265223       0.137500   -9999.000000       0.181200       0.615000
53937     53937     gansu          107.9200       35.5100           98       152     2012      06        29        181              0.189250      22.744995       5.424814       0.287243       0.148000   -9999.000000       0.196500   -9999.000000
53937     53937     gansu          107.9200       35.5100           98       152     2012      06        30        182              0.194333      23.202515       0.000000       0.315797       0.114000   -9999.000000       0.170000   -9999.000000
53937     53937     gansu          107.9200       35.5100           98       152     2012      07        01        183              0.189750      26.182007       1.178175       0.281831   -9999.000000   -9999.000000   -9999.000000       0.441000
53937     53937     gansu          107.9200       35.5100           98       152     2012      07        02        184              0.188250      27.287506       0.070586       0.266907       0.098000   -9999.000000       0.163500   -9999.000000
53937     53937     gansu          107.9200       35.5100           98       152     2012      07        03        185              0.188292      26.028015       0.000000       0.261297       0.092000   -9999.000000       0.181500       0.386000
53937     53937     gansu          107.9200       35.5100           98       152     2012      07        04        186              0.186167      27.179993       7.656192       0.247226       0.103000   -9999.000000       0.172600   -9999.000000
53937     53937     gansu          107.9200       35.5100           98       152     2012      07        05        187              0.190042      25.330048       0.000000       0.275879       0.099000   -9999.000000       0.195200   -9999.000000
53937     53937     gansu          107.9200       35.5100           98       152     2012      07        06        188              0.188958      26.782806      15.224016       0.265537   -9999.000000   -9999.000000   -9999.000000       0.386000
53937     53937     gansu          107.9200       35.5100           98       152     2012      07        07        189              0.205500      25.972992       0.219486       0.279376   -9999.000000   -9999.000000       0.211600   -9999.000000
53937     53937     gansu          107.9200       35.5100           98       152     2012      07        08        190              0.301375      26.470245      24.069538       0.305664       0.124500   -9999.000000       0.173000       0.956000
53937     53937     gansu          107.9200       35.5100           98       152     2012      07        09        191              0.309583      23.331085       3.129886       0.353539       0.126500   -9999.000000       0.214900   -9999.000000
53937     53937     gansu          107.9200       35.5100           98       152     2012      07        10        192              0.288417      23.348724       0.000000       0.331824       0.109000       0.140200       0.201600       0.904000
53937     53937     gansu          107.9200       35.5100           98       152     2012      07        11        193              0.269167      27.519562       0.322153       0.308392   -9999.000000   -9999.000000       0.202600       0.613000
53937     53937     gansu          107.9200       35.5100           98       152     2012      07        12        194              0.259625      25.166809       0.021458       0.301035       0.108000   -9999.000000   -9999.000000   -9999.000000
53937     53937     gansu          107.9200       35.5100           98       152     2012      07        13        195              0.249708      27.330444       1.385349       0.287595       0.119000   -9999.000000       0.177200       0.493000
53937     53937     gansu          107.9200       35.5100           98       152     2012      07        14        196              0.260292      26.599182       8.376926       0.284824       0.100500   -9999.000000       0.194200   -9999.000000
53937     53937     gansu          107.9200       35.5100           98       152     2012      07        15        197              0.259583      26.452911       0.000000       0.302261       0.101000       0.087000       0.182500       0.630000
53937     53937     gansu          107.9200       35.5100           98       152     2012      07        16        198              0.250583      25.387848       0.147839       0.298044       0.109000   -9999.000000       0.222900       0.489000
53937     53937     gansu          107.9200       35.5100           98       152     2012      07        17        199              0.243417      25.914459       0.558214       0.287627       0.115000   -9999.000000   -9999.000000       0.484000
53937     53937     gansu          107.9200       35.5100           98       152     2012      07        18        200              0.236708      25.546234       0.164675       0.281473       0.113000       0.044900   -9999.000000       0.368000
53937     53937     gansu          107.9200       35.5100           98       152     2012      07        19        201              0.230833      26.094574       0.375071       0.272803       0.099000   -9999.000000       0.173000   -9999.000000
53937     53937     gansu          107.9200       35.5100           98       152     2012      07        20        202              0.230000      24.957397       5.212681       0.273037   -9999.000000   -9999.000000       0.200900       0.586000
53937     53937     gansu          107.9200       35.5100           98       152     2012      07        21        203              0.307000      24.937439      32.291122       0.296650   -9999.000000   -9999.000000       0.199800       1.000000
53937     53937     gansu          107.9200       35.5100           98       152     2012      07        22        204              0.278583      21.963379       0.000000       0.365919       0.133000   -9999.000000       0.264700       1.000000
53937     53937     gansu          107.9200       35.5100           98       152     2012      07        23        205              0.262542      25.360352       0.955169       0.326161       0.141000   -9999.000000   -9999.000000       0.690000
53937     53937     gansu          107.9200       35.5100           98       152     2012      07        24        206              0.259375      23.089233       4.224777       0.318997       0.132000   -9999.000000       0.171800   -9999.000000
53937     53937     gansu          107.9200       35.5100           98       152     2012      07        25        207              0.250125      24.163727       0.294040       0.327523       0.129000   -9999.000000       0.140000       0.735000
53937     53937     gansu          107.9200       35.5100           98       152     2012      07        26        208              0.239208      26.478424       1.636314       0.313915       0.126000   -9999.000000       0.166800       0.620000
53937     53937     gansu          107.9200       35.5100           98       152     2012      07        27        209              0.229250      27.866089       1.527755       0.309664   -9999.000000   -9999.000000       0.152400       0.728000
53937     53937     gansu          107.9200       35.5100           98       152     2012      07        28        210              0.220083      28.495331       0.848997       0.302628       0.121000       0.112400       0.155100       0.467000
53937     53937     gansu          107.9200       35.5100           98       152     2012      07        29        211              0.212958      29.083923       0.000000       0.294492       0.107000   -9999.000000   -9999.000000   -9999.000000
53937     53937     gansu          107.9200       35.5100           98       152     2012      07        30        212              0.206042      29.862732       2.916169       0.281793       0.120000   -9999.000000       0.123800       0.802000
53937     53937     gansu          107.9200       35.5100           98       152     2012      07        31        213              0.204708      25.695496       1.783181       0.293353       0.110000       0.012400       0.131900   -9999.000000
53937     53937     gansu          107.9200       35.5100           98       152     2012      08        01        214              0.204542      23.547272       0.271405       0.294477   -9999.000000   -9999.000000       0.116900       0.658000
53937     53937     gansu          107.9200       35.5100           98       152     2012      08        02        215              0.204000      23.939240       0.643881       0.292096       0.129000   -9999.000000       0.125200   -9999.000000
53937     53937     gansu          107.9200       35.5100           98       152     2012      08        03        216              0.203250      26.734406       0.183234       0.282055       0.127000   -9999.000000   -9999.000000   -9999.000000
53937     53937     gansu          107.9200       35.5100           98       152     2012      08        04        217              0.201667      27.367615       1.111164       0.277136       0.107500   -9999.000000   -9999.000000       0.527000
53937     53937     gansu          107.9200       35.5100           98       152     2012      08        05        218              0.201500      26.755157       1.427327       0.276244       0.113000       0.029000       0.101400   -9999.000000
53937     53937     gansu          107.9200       35.5100           98       152     2012      08        06        219              0.200000      25.826721       0.527765       0.279714       0.117000   -9999.000000       0.121500       0.527000
53937     53937     gansu          107.9200       35.5100           98       152     2012      08        07        220              0.198250      26.086731       0.926965       0.276445   -9999.000000   -9999.000000       0.109200   -9999.000000
53937     53937     gansu          107.9200       35.5100           98       152     2012      08        08        221              0.194833      27.715454       2.797776       0.270082       0.140000   -9999.000000       0.121900       0.446000
53937     53937     gansu          107.9200       35.5100           98       152     2012      08        09        222              0.193333      26.868347       0.315792       0.280435       0.113500   -9999.000000   -9999.000000       0.569000
53937     53937     gansu          107.9200       35.5100           98       152     2012      08        10        223              0.189958      28.156036       0.000000       0.268044       0.110000   -9999.000000       0.117200   -9999.000000
53937     53937     gansu          107.9200       35.5100           98       152     2012      08        11        224              0.221333      26.751099       6.791729       0.260434       0.121000   -9999.000000       0.115900       0.607000
53937     53937     gansu          107.9200       35.5100           98       152     2012      08        12        225              0.246542      27.668243       0.916685       0.275400       0.114000   -9999.000000       0.125400   -9999.000000
53937     53937     gansu          107.9200       35.5100           98       152     2012      08        13        226              0.233042      27.267303      17.243156       0.280763   -9999.000000       0.133500       0.151000       0.881000
53937     53937     gansu          107.9200       35.5100           98       152     2012      08        14        227              0.260250      23.524658       6.785074       0.313987       0.161000   -9999.000000       0.155900       0.925000
53937     53937     gansu          107.9200       35.5100           98       152     2012      08        15        228              0.246417      23.626984       0.000000       0.336523       0.129500   -9999.000000   -9999.000000       0.943000
53937     53937     gansu          107.9200       35.5100           98       152     2012      08        16        229              0.231958      25.928711       0.285145       0.308135       0.120000   -9999.000000       0.134300       0.641000
53937     53937     gansu          107.9200       35.5100           98       152     2012      08        17        230              0.280042      25.109222      24.550800       0.299363   -9999.000000   -9999.000000       0.153400   -9999.000000
53937     53937     gansu          107.9200       35.5100           98       152     2012      08        18        231              0.302667      23.072693      12.876474       0.351734       0.170000       0.328800       0.152900       1.000000
53937     53937     gansu          107.9200       35.5100           98       152     2012      08        19        232              0.282833      20.280853       0.124637       0.359299       0.163000   -9999.000000       0.167200       0.955000
53937     53937     gansu          107.9200       35.5100           98       152     2012      08        20        233              0.272542      21.518494       3.279861       0.336985       0.141000   -9999.000000   -9999.000000       1.000000
53937     53937     gansu          107.9200       35.5100           98       152     2012      08        21        234              0.261333      23.184265       0.000000       0.332914       0.135500   -9999.000000       0.170600   -9999.000000
53937     53937     gansu          107.9200       35.5100           98       152     2012      08        22        235              0.247500      21.369904       0.000000       0.321141       0.126000   -9999.000000       0.124800   -9999.000000
53937     53937     gansu          107.9200       35.5100           98       152     2012      08        23        236              0.235417      22.146698       0.000000       0.311480   -9999.000000       0.105100       0.162900       0.572000
53937     53937     gansu          107.9200       35.5100           98       152     2012      08        24        237              0.226833      22.272705       1.259174       0.306012   -9999.000000   -9999.000000       0.142100   -9999.000000
53937     53937     gansu          107.9200       35.5100           98       152     2012      08        25        238              0.000000      22.851501      10.999652       0.302377       0.136000   -9999.000000       0.142800   -9999.000000
53937     53937     gansu          107.9200       35.5100           98       152     2012      08        26        239              0.273042      23.262726       4.064183       0.321708       0.142000       0.103800   -9999.000000       0.930000
53937     53937     gansu          107.9200       35.5100           98       152     2012      08        27        240              0.264458      23.077972       4.751322       0.320609       0.136000   -9999.000000       0.168000   -9999.000000
53937     53937     gansu          107.9200       35.5100           98       152     2012      08        28        241              0.259000      22.616882       0.176218       0.322919       0.119000       0.070000       0.152300       0.793000
53937     53937     gansu          107.9200       35.5100           98       152     2012      08        29        242              0.244375      23.614471       0.000000       0.312885       0.136000   -9999.000000       0.156500   -9999.000000
53937     53937     gansu          107.9200       35.5100           98       152     2012      08        30        243              0.234667      24.036255       8.646106       0.301809   -9999.000000   -9999.000000       0.153000       0.495000
53937     53937     gansu          107.9200       35.5100           98       152     2012      08        31        244              0.287167      24.153687      34.108124       0.307620       0.145000       0.073200       0.192200   -9999.000000
53937     53937     gansu          107.9200       35.5100           98       152     2012      09        01        245              0.321667      20.531128      13.759645       0.355701       0.170000   -9999.000000   -9999.000000   -9999.000000
53937     53937     gansu          107.9200       35.5100           98       152     2012      09        02        246              0.285208      17.179260       0.498107       0.373368       0.151000       0.077100       0.166900       0.962000
53937     53937     gansu          107.9200       35.5100           98       152     2012      09        03        247              0.268667      19.908203       0.000000       0.345425   -9999.000000   -9999.000000       0.153600   -9999.000000
53937     53937     gansu          107.9200       35.5100           98       152     2012      09        04        248              0.255667      20.626129       0.189999       0.334466       0.143000   -9999.000000       0.138100       0.635000
53937     53937     gansu          107.9200       35.5100           98       152     2012      09        05        249              0.246833      21.622925       0.067474       0.327606       0.126000       0.092200       0.145000   -9999.000000
53937     53937     gansu          107.9200       35.5100           98       152     2012      09        06        250              0.241250      22.571167       0.254470       0.322952       0.123000   -9999.000000   -9999.000000       0.674000
53937     53937     gansu          107.9200       35.5100           98       152     2012      09        07        251              0.238958      22.801086       3.297353       0.318776       0.147000       0.137900       0.155800       0.990000
53937     53937     gansu          107.9200       35.5100           98       152     2012      09        08        252              0.242375      21.336884       0.000000       0.325523       0.148000   -9999.000000       0.114700   -9999.000000
53937     53937     gansu          107.9200       35.5100           98       152     2012      09        09        253              0.238583      22.328583       1.027070       0.319008   -9999.000000   -9999.000000       0.154700       0.674000
53937     53937     gansu          107.9200       35.5100           98       152     2012      09        10        254              0.328917      20.683136      28.509670       0.317885       0.163000       0.055200       0.160000   -9999.000000
53937     53937     gansu          107.9200       35.5100           98       152     2012      09        11        255              0.295708      18.192200       0.057865       0.371009       0.152000   -9999.000000       0.165100       0.997000
53937     53937     gansu          107.9200       35.5100           98       152     2012      09        12        256              0.275042      19.042694       0.000000       0.341481       0.146500   -9999.000000   -9999.000000       0.746000
53937     53937     gansu          107.9200       35.5100           98       152     2012      09        13        257              0.261958      16.044281       0.000000       0.331414       0.125000       0.068100       0.137400       0.717000
53937     53937     gansu          107.9200       35.5100           98       152     2012      09        14        258              0.250417      16.153931       0.000000       0.324802       0.142000   -9999.000000       0.143600       0.548000
53937     53937     gansu          107.9200       35.5100           98       152     2012      09        15        259              0.246083      17.357391       2.977161       0.318867       0.162000   -9999.000000       0.133200   -9999.000000
53937     53937     gansu          107.9200       35.5100           98       152     2012      09        16        260              0.253083      16.474182       0.776888       0.325205       0.146000   -9999.000000       0.160600       0.783000
53937     53937     gansu          107.9200       35.5100           98       152     2012      09        17        261              0.251208      15.031830       0.115647       0.326442       0.138500   -9999.000000       0.146600       0.722000
53937     53937     gansu          107.9200       35.5100           98       152     2012      09        18        262              0.244333      17.602020       0.069899       0.320084       0.131000       0.086200   -9999.000000       0.714000
53937     53937     gansu          107.9200       35.5100           98       152     2012      09        19        263              0.237333      18.251770       0.000000       0.314347       0.129000   -9999.000000       0.122200       0.456000
53937     53937     gansu          107.9200       35.5100           98       152     2012      09        20        264              0.247792      19.214325      11.872066       0.308930       0.173000       0.097800       0.163100   -9999.000000
53937     53937     gansu          107.9200       35.5100           98       152     2012      09        21        265              0.266125      16.750702       0.069385       0.338772   -9999.000000   -9999.000000       0.153700       0.834000
53937     53937     gansu          107.9200       35.5100           98       152     2012      09        22        266              0.257208      19.005737       0.000000       0.327864       0.129500   -9999.000000       0.160400       0.780000
53937     53937     gansu          107.9200       35.5100           98       152     2012      09        23        267              0.251583      18.376465       0.314714       0.321900       0.133000       0.065000   -9999.000000       0.809000
53937     53937     gansu          107.9200       35.5100           98       152     2012      09        24        268              0.253750      19.250916      17.384228       0.318192       0.149000   -9999.000000       0.152800       0.745000
53937     53937     gansu          107.9200       35.5100           98       152     2012      09        25        269              0.327043      18.186676      12.533908       0.334423       0.154000   -9999.000000       0.123200   -9999.000000
53937     53937     gansu          107.9200       35.5100           98       152     2012      09        26        270              0.300292      14.335297       0.000000       0.366101       0.153000   -9999.000000       0.142100       0.892000
53937     53937     gansu          107.9200       35.5100           98       152     2012      09        27        271              0.287857      17.503937       0.000000       0.342146       0.137500   -9999.000000       0.136800   -9999.000000
53937     53937     gansu          107.9200       35.5100           98       152     2012      09        28        272              0.269533      15.546051       0.000000       0.333081       0.131000   -9999.000000       0.139700       0.638000
53937     53937     gansu          107.9200       35.5100           98       152     2012      09        29        273              0.263708      13.159882       0.463486       0.327546       0.131000   -9999.000000   -9999.000000   -9999.000000
53937     53937     gansu          107.9200       35.5100           98       152     2012      09        30        274              0.256250      15.647858       0.488775       0.323050   -9999.000000   -9999.000000       0.123800   -9999.000000
53937     53937     gansu          107.9200       35.5100           98       152     2012      10        01        275              0.248792      16.551819       0.000000       0.319206       0.124000       0.133200       0.126200       0.628000
53937     53937     gansu          107.9200       35.5100           98       152     2012      10        02        276              0.245000      17.483093       0.497518       0.315327       0.127000   -9999.000000       0.115500   -9999.000000
53937     53937     gansu          107.9200       35.5100           98       152     2012      10        03        277              0.243083      16.002747       0.000000       0.316836       0.108000   -9999.000000       0.126300       0.552000
53937     53937     gansu          107.9200       35.5100           98       152     2012      10        04        278              0.240000      17.061707       0.052844       0.313089       0.128000   -9999.000000   -9999.000000   -9999.000000
53937     53937     gansu          107.9200       35.5100           98       152     2012      10        05        279              0.237792      14.056030       0.000000       0.312942       0.116000   -9999.000000   -9999.000000       0.618000
53937     53937     gansu          107.9200       35.5100           98       152     2012      10        06        280              0.235000      15.141296       0.000000       0.309923       0.126000       0.079600       0.100300       0.616000
53937     53937     gansu          107.9200       35.5100           98       152     2012      10        07        281              0.235000      14.739746       0.000000       0.308967       0.126000   -9999.000000       0.126300   -9999.000000
53937     53937     gansu          107.9200       35.5100           98       152     2012      10        08        282              0.233625      14.398102       0.094929       0.309280       0.116500   -9999.000000       0.100300       0.554000
53937     53937     gansu          107.9200       35.5100           98       152     2012      10        09        283              0.229652      13.374573       0.000000       0.309335       0.107000   -9999.000000       0.102400   -9999.000000
53937     53937     gansu          107.9200       35.5100           98       152     2012      10        10        284              0.225292      14.172821       0.000000       0.304638       0.105000   -9999.000000   -9999.000000       0.527000
53937     53937     gansu          107.9200       35.5100           98       152     2012      10        11        285              0.222708      15.100555       0.000000       0.301866       0.113000       0.191200       0.095200       0.588000
53937     53937     gansu          107.9200       35.5100           98       152     2012      10        12        286              0.220542      16.233307       0.000000       0.300923       0.110000   -9999.000000       0.082400       0.582000
53937     53937     gansu          107.9200       35.5100           98       152     2012      10        13        287              0.217417      15.485382       0.000000       0.298773       0.096500   -9999.000000       0.101300       0.450000
53937     53937     gansu          107.9200       35.5100           98       152     2012      10        14        288              0.216000      15.268555       0.031041       0.295352       0.105500   -9999.000000       0.097000   -9999.000000
53937     53937     gansu          107.9200       35.5100           98       152     2012      10        15        289              0.216000      13.739960       1.704161       0.297291       0.128000   -9999.000000       0.115300       0.453000
53937     53937     gansu          107.9200       35.5100           98       152     2012      10        16        290              0.214542      12.547943       0.000000       0.302833       0.106000       0.036800   -9999.000000       0.471000
53937     53937     gansu          107.9200       35.5100           98       152     2012      10        17        291              0.212750      10.349030       0.000000       0.299351       0.112000   -9999.000000       0.103900       0.507000
53937     53937     gansu          107.9200       35.5100           98       152     2012      10        18        292              0.216250      11.642303       5.086146       0.295393       0.129000   -9999.000000       0.121400       0.768000
53937     53937     gansu          107.9200       35.5100           98       152     2012      10        19        293              0.223500       8.547211       0.000000       0.317262       0.108000   -9999.000000       0.110700   -9999.000000
53937     53937     gansu          107.9200       35.5100           98       152     2012      10        20        294              0.224750      11.760559       0.088929       0.308096       0.113000   -9999.000000       0.120500       0.583000
53937     53937     gansu          107.9200       35.5100           98       152     2012      10        21        295              0.221792      14.536713       0.431073       0.303923       0.160000   -9999.000000   -9999.000000       0.508000
53937     53937     gansu          107.9200       35.5100           98       152     2012      10        22        296              0.220708       7.896210       0.048962       0.304682   -9999.000000   -9999.000000       0.112100       0.596000
53937     53937     gansu          107.9200       35.5100           98       152     2012      10        23        297              0.217667       9.654053       0.333603       0.300636   -9999.000000   -9999.000000       0.080500       0.368000
53937     53937     gansu          107.9200       35.5100           98       152     2012      10        24        298              0.217333       8.192078       0.000000       0.300648   -9999.000000       0.103900       0.110800   -9999.000000
53937     53937     gansu          107.9200       35.5100           98       152     2012      10        25        299              0.000000       9.157135       0.000000       0.298600       0.135500   -9999.000000       0.099500       0.483000
53937     53937     gansu          107.9200       35.5100           98       152     2012      10        26        300              0.214833      11.075836       0.000000       0.296598       0.136000   -9999.000000       0.103800   -9999.000000
53937     53937     gansu          107.9200       35.5100           98       152     2012      10        27        301              0.212458      11.988525       0.000000       0.294547   -9999.000000   -9999.000000   -9999.000000       0.415000
53937     53937     gansu          107.9200       35.5100           98       152     2012      10        28        302              0.000000      12.420197       0.041654       0.292542       0.146000   -9999.000000       0.101300   -9999.000000
53937     53937     gansu          107.9200       35.5100           98       152     2012      10        29        303              0.211292       9.892181       0.000000       0.294231       0.138000       0.149100       0.084500   -9999.000000
53937     53937     gansu          107.9200       35.5100           98       152     2012      10        30        304              0.208750      10.219238       0.000000       0.291956       0.121000   -9999.000000       0.098600       0.393000
53937     53937     gansu          107.9200       35.5100           98       152     2012      10        31        305              0.206833       8.880798       0.000000       0.289910       0.138000       0.266900       0.096800   -9999.000000
53937     53937     gansu          107.9200       35.5100           98       152     2012      11        01        306              0.205833       8.370026       0.000000       0.288513       0.120000   -9999.000000       0.096100       0.384000
53937     53937     gansu          107.9200       35.5100           98       152     2012      11        02        307              0.205667       9.378265       1.246013       0.288487   -9999.000000   -9999.000000   -9999.000000   -9999.000000
53937     53937     gansu          107.9200       35.5100           98       152     2012      11        03        308              0.204417       9.471069       0.064008       0.291639   -9999.000000       0.031900       0.080800       0.514000
53937     53937     gansu          107.9200       35.5100           98       152     2012      11        04        309              0.201708       3.782715       0.218020       0.271623       0.117000   -9999.000000       0.097200       0.281000
53937     53937     gansu          107.9200       35.5100           98       152     2012      11        05        310              0.200958       3.556274       1.952212       0.270625       0.114000       0.100600       0.078900   -9999.000000
53937     53937     gansu          107.9200       35.5100           98       152     2012      11        06        311              0.201542       4.790192       0.127939       0.277079       0.128000       0.041800       0.091600       0.349000
53937     53937     gansu          107.9200       35.5100           98       152     2012      11        07        312              0.201958       6.118805       0.443329       0.286624   -9999.000000   -9999.000000   -9999.000000   -9999.000000
53937     53937     gansu          107.9200       35.5100           98       152     2012      11        08        313              0.201875       4.817963       0.000000       0.288174       0.145000       0.069100       0.097500       0.241000
53937     53937     gansu          107.9200       35.5100           98       152     2012      11        09        314              0.202000       6.656036       0.986006       0.288570       0.148000   -9999.000000       0.066800       0.603000
53937     53937     gansu          107.9200       35.5100           98       152     2012      11        10        315              0.201250       4.515930       0.233506       0.296368       0.127000   -9999.000000       0.089600       0.491000
53937     53937     gansu          107.9200       35.5100           98       152     2012      11        11        316              0.198250       3.214203       0.308391       0.263304       0.133000       0.077900       0.081800       0.203000
53937     53937     gansu          107.9200       35.5100           98       152     2012      11        12        317              0.197750       3.493439       0.000000       0.268241       0.127000   -9999.000000       0.086200   -9999.000000
53937     53937     gansu          107.9200       35.5100           98       152     2012      11        13        318              0.000000       4.921448       0.000000       0.279249   -9999.000000   -9999.000000   -9999.000000       0.264000
53937     53937     gansu          107.9200       35.5100           98       152     2012      11        14        319              0.200125       5.984833       0.000000       0.284316       0.134000   -9999.000000       0.085200       0.355000
53937     53937     gansu          107.9200       35.5100           98       152     2012      11        15        320              0.201000       5.784576       0.812213       0.287663   -9999.000000   -9999.000000       0.085200       0.649000
53937     53937     gansu          107.9200       35.5100           98       152     2012      11        16        321              0.201565       3.109161       0.126569       0.290178       0.139000       0.074400       0.075900       0.285000
53937     53937     gansu          107.9200       35.5100           98       152     2012      11        17        322              0.000000       4.772339       0.000000       0.285535       0.135000   -9999.000000       0.089500   -9999.000000
53937     53937     gansu          107.9200       35.5100           98       152     2012      11        18        323              0.201042       6.322174       0.000000       0.288086   -9999.000000       0.134500   -9999.000000       0.298000
53937     53937     gansu          107.9200       35.5100           98       152     2012      11        19        324              0.200625       5.406219       0.000000       0.284414       0.149000   -9999.000000   -9999.000000       0.367000
53937     53937     gansu          107.9200       35.5100           98       152     2012      11        20        325              0.201125       5.163300       0.000000       0.287151       0.121500   -9999.000000       0.058000       0.411000
53937     53937     gansu          107.9200       35.5100           98       152     2012      11        21        326              0.201042       5.313232       0.000000       0.289244       0.118000       0.049000       0.081400       0.248000
53937     53937     gansu          107.9200       35.5100           98       152     2012      11        22        327              0.199625       6.134308       0.000000       0.289194       0.115000   -9999.000000       0.068900   -9999.000000
53937     53937     gansu          107.9200       35.5100           98       152     2012      11        23        328              0.197750       2.405121       0.000000       0.264833   -9999.000000       0.038400       0.075800       0.066000
53937     53937     gansu          107.9200       35.5100           98       152     2012      11        24        329              0.194833       2.007355       0.307591       0.245679       0.120000   -9999.000000   -9999.000000   -9999.000000
53937     53937     gansu          107.9200       35.5100           98       152     2012      11        25        330              0.196583       0.596771       0.207237       0.235425       0.118000   -9999.000000       0.070900       0.123000
53937     53937     gansu          107.9200       35.5100           98       152     2012      11        26        331              0.190167       0.894684       0.000000       0.232972       0.110000       0.046500   -9999.000000   -9999.000000
53937     53937     gansu          107.9200       35.5100           98       152     2012      11        27        332              0.183750       0.940765       0.000000       0.232225       0.130000   -9999.000000       0.069400   -9999.000000
53937     53937     gansu          107.9200       35.5100           98       152     2012      11        28        333              0.169708       1.544403       0.000000       0.238205       0.121000   -9999.000000       0.064000       0.037000
53937     53937     gansu          107.9200       35.5100           98       152     2012      11        29        334              0.155167       0.096710       0.000000       0.219202   -9999.000000       0.051300       0.069600   -9999.000000
53937     53937     gansu          107.9200       35.5100           98       152     2012      11        30        335              0.152708      -0.670929       2.030896       0.204085       0.128000   -9999.000000   -9999.000000       0.152000
53937     53937     gansu          107.9200       35.5100           98       152     2012      12        01        336              0.168083       0.499268       0.211769       0.218915       0.118000       0.019400       0.067200   -9999.000000
53937     53937     gansu          107.9200       35.5100           98       152     2012      12        02        337              0.168542       1.057953       0.000000       0.235887       0.109000   -9999.000000       0.071100       0.135000
53937     53937     gansu          107.9200       35.5100           98       152     2012      12        03        338              0.167417       1.848663       0.000000       0.241175       0.122000   -9999.000000       0.059600       0.094000
53937     53937     gansu          107.9200       35.5100           98       152     2012      12        04        339              0.163625       1.205353       0.000000       0.234682   -9999.000000       0.060800       0.070500   -9999.000000
53937     53937     gansu          107.9200       35.5100           98       152     2012      12        05        340              0.161500       1.867035       0.000000       0.241509   -9999.000000   -9999.000000   -9999.000000       0.068000
53937     53937     gansu          107.9200       35.5100           98       152     2012      12        06        341              0.162708       1.375793       0.000000       0.234519       0.103000   -9999.000000       0.069500   -9999.000000
53937     53937     gansu          107.9200       35.5100           98       152     2012      12        07        342              0.173333       1.929535       0.000000       0.246765       0.109000   -9999.000000       0.043900       0.062000
53937     53937     gansu          107.9200       35.5100           98       152     2012      12        08        343              0.157208       1.674164       0.000000       0.236887       0.119000   -9999.000000       0.069700       0.099000
53937     53937     gansu          107.9200       35.5100           98       152     2012      12        09        344              0.148583       0.151581       0.000000       0.218333       0.120000       0.016100       0.058500       0.105000
53937     53937     gansu          107.9200       35.5100           98       152     2012      12        10        345              0.145833      -0.301331       0.049527       0.206702   -9999.000000   -9999.000000       0.066400       0.054000
53937     53937     gansu          107.9200       35.5100           98       152     2012      12        11        346              0.143750       0.584015       0.087555       0.219432       0.099000   -9999.000000   -9999.000000   -9999.000000
53937     53937     gansu          107.9200       35.5100           98       152     2012      12        12        347              0.145917       0.165619       0.000000       0.215750       0.099000   -9999.000000       0.067400       0.081000
53937     53937     gansu          107.9200       35.5100           98       152     2012      12        13        348              0.149375       0.450439       1.756065       0.217350   -9999.000000   -9999.000000       0.059500       0.096000
53937     53937     gansu          107.9200       35.5100           98       152     2012      12        14        349              0.151250      -0.516266       0.000000       0.198010       0.110000       0.026600       0.072500       0.128000
53937     53937     gansu          107.9200       35.5100           98       152     2012      12        15        350              0.000000       0.213196       0.000000       0.212744   -9999.000000   -9999.000000       0.070600       0.064000
53937     53937     gansu          107.9200       35.5100           98       152     2012      12        16        351              0.154333      -0.512451       0.000000       0.193584   -9999.000000   -9999.000000       0.067200   -9999.000000
53937     53937     gansu          107.9200       35.5100           98       152     2012      12        17        352              0.154500      -0.291809       0.115961       0.202307   -9999.000000   -9999.000000   -9999.000000       0.034000
53937     53937     gansu          107.9200       35.5100           98       152     2012      12        18        353              0.148875      -0.804077       0.090550       0.199060       0.096000   -9999.000000       0.059200       0.075000
53937     53937     gansu          107.9200       35.5100           98       152     2012      12        19        354              0.146458      -0.600555       0.000000       0.201638       0.110000       0.022500       0.070100       0.083000
53937     53937     gansu          107.9200       35.5100           98       152     2012      12        20        355              0.000000      -0.446716       0.769716       0.197990   -9999.000000   -9999.000000       0.055800   -9999.000000
53937     53937     gansu          107.9200       35.5100           98       152     2012      12        21        356              0.142875      -2.140259       0.047855       0.176872   -9999.000000   -9999.000000       0.065600   -9999.000000
53937     53937     gansu          107.9200       35.5100           98       152     2012      12        22        357              0.138208      -2.680176       0.000000       0.171781   -9999.000000       0.047600   -9999.000000       0.053000
53937     53937     gansu          107.9200       35.5100           98       152     2012      12        23        358              0.134125      -5.313141       0.000000       0.156305   -9999.000000   -9999.000000       0.069900   -9999.000000
53937     53937     gansu          107.9200       35.5100           98       152     2012      12        24        359              0.133421      -5.392151       7.611394       0.149295       0.099000       0.059100       0.039900       0.020000
53937     53937     gansu          107.9200       35.5100           98       152     2012      12        25        360              0.133625      -2.778625       0.000000       0.171983       0.095000   -9999.000000       0.069200   -9999.000000
53937     53937     gansu          107.9200       35.5100           98       152     2012      12        26        361              0.000000      -3.030212       0.000000       0.170248   -9999.000000   -9999.000000       0.059400   -9999.000000
53937     53937     gansu          107.9200       35.5100           98       152     2012      12        27        362              0.132667      -3.916931       0.000000       0.158917   -9999.000000       0.040400       0.065700       0.009000
53937     53937     gansu          107.9200       35.5100           98       152     2012      12        28        363              0.000000      -3.278717       0.151305       0.165601   -9999.000000   -9999.000000   -9999.000000   -9999.000000
53937     53937     gansu          107.9200       35.5100           98       152     2012      12        29        364              0.000000      -4.623047       0.000000       0.155802   -9999.000000   -9999.000000       0.060900   -9999.000000
53937     53937     gansu          107.9200       35.5100           98       152     2012      12        30        365              0.000000      -7.330658       0.000000       0.141126       0.095000   -9999.000000       0.066100   -9999.000000
53937     53937     gansu          107.9200       35.5100           98       152     2012      12        31        366              0.129867      -4.880341       0.000000       0.153557   -9999.000000   -9999.000000       0.044100   -9999.000000
