# Supplementary material for: Research on Fusing Multisatellite Soil Moisture Data Based on Bayesian Model Averaging
Source: Hindawi journal article supplement (doi:10.1155/2018/9310838), 2018-06-25
Supplement: f1 [file 9310838.f1.zip › 2012_sm00-10cm_daily_ZDB_ZHY_53941_366days_allin.txt]

53941     53941     shaanxi        109.5833       35.1833           99       158     2012      01        01        001              0.000000   -9999.000000       0.000000   -9999.000000       0.086000   -9999.000000       0.039200   -9999.000000
53941     53941     shaanxi        109.5833       35.1833           99       158     2012      01        02        002              0.167500      -1.373077       0.000000       0.182160       0.088000   -9999.000000   -9999.000000       0.069000
53941     53941     shaanxi        109.5833       35.1833           99       158     2012      01        03        003              0.000000      -1.500214       0.000000       0.183804       0.087000   -9999.000000       0.043700   -9999.000000
53941     53941     shaanxi        109.5833       35.1833           99       158     2012      01        04        004              0.138609      -4.417053       0.000000       0.168063   -9999.000000   -9999.000000       0.032900       0.005000
53941     53941     shaanxi        109.5833       35.1833           99       158     2012      01        05        005              0.133500      -5.022186       0.000000       0.163423   -9999.000000   -9999.000000       0.043400       0.033000
53941     53941     shaanxi        109.5833       35.1833           99       158     2012      01        06        006              0.136333      -4.128906       0.000000       0.165477       0.084000   -9999.000000       0.040600       0.120000
53941     53941     shaanxi        109.5833       35.1833           99       158     2012      01        07        007              0.139000      -1.741699       0.000000       0.179549   -9999.000000   -9999.000000       0.045300       0.020000
53941     53941     shaanxi        109.5833       35.1833           99       158     2012      01        08        008              0.000000      -2.437286       0.000000       0.177944       0.089000   -9999.000000   -9999.000000   -9999.000000
53941     53941     shaanxi        109.5833       35.1833           99       158     2012      01        09        009              0.139000      -1.488892       0.000000       0.182207   -9999.000000   -9999.000000   -9999.000000       0.020000
53941     53941     shaanxi        109.5833       35.1833           99       158     2012      01        10        010              0.140625      -1.198700       0.000000       0.183759   -9999.000000   -9999.000000       0.031100       0.086000
53941     53941     shaanxi        109.5833       35.1833           99       158     2012      01        11        011              0.139250      -1.687469       0.000000       0.181632       0.082000   -9999.000000       0.029300       0.083000
53941     53941     shaanxi        109.5833       35.1833           99       158     2012      01        12        012              0.137917      -1.950226       0.000000       0.179668       0.091000   -9999.000000       0.036700       0.007000
53941     53941     shaanxi        109.5833       35.1833           99       158     2012      01        13        013              0.141167      -1.396057       0.000000       0.181920       0.087000   -9999.000000   -9999.000000   -9999.000000
53941     53941     shaanxi        109.5833       35.1833           99       158     2012      01        14        014              0.141708      -0.893250       0.000000       0.185522   -9999.000000   -9999.000000   -9999.000000       0.021000
53941     53941     shaanxi        109.5833       35.1833           99       158     2012      01        15        015              0.139625      -1.714813       0.000000       0.181069   -9999.000000   -9999.000000       0.024600   -9999.000000
53941     53941     shaanxi        109.5833       35.1833           99       158     2012      01        16        016              0.138958      -0.997345       0.000000       0.184020       0.073000   -9999.000000       0.026800       0.002000
53941     53941     shaanxi        109.5833       35.1833           99       158     2012      01        17        017              0.000000      -1.041931       0.272458       0.184916       0.079000   -9999.000000       0.023900       0.032000
53941     53941     shaanxi        109.5833       35.1833           99       158     2012      01        18        018              0.142958      -0.123413       0.000000       0.190054       0.089000   -9999.000000       0.030200   -9999.000000
53941     53941     shaanxi        109.5833       35.1833           99       158     2012      01        19        019              0.148375      -0.152313       0.000000       0.189854   -9999.000000   -9999.000000   -9999.000000       0.010000
53941     53941     shaanxi        109.5833       35.1833           99       158     2012      01        20        020              0.151625      -0.685791       0.229500       0.188948   -9999.000000   -9999.000000       0.029600   -9999.000000
53941     53941     shaanxi        109.5833       35.1833           99       158     2012      01        21        021              0.146875      -1.265411       5.610398       0.185689   -9999.000000   -9999.000000       0.020300       0.006000
53941     53941     shaanxi        109.5833       35.1833           99       158     2012      01        22        022              0.137083      -3.632660       0.345972       0.164769   -9999.000000       0.095600       0.027100   -9999.000000
53941     53941     shaanxi        109.5833       35.1833           99       158     2012      01        23        023              0.133375      -5.016693       0.000000       0.159857   -9999.000000   -9999.000000       0.025100   -9999.000000
53941     53941     shaanxi        109.5833       35.1833           99       158     2012      01        24        024              0.131250      -5.404541       0.000000       0.157521   -9999.000000   -9999.000000   -9999.000000       0.006000
53941     53941     shaanxi        109.5833       35.1833           99       158     2012      01        25        025              0.130250      -5.596039       0.864292       0.158231   -9999.000000   -9999.000000   -9999.000000   -9999.000000
53941     53941     shaanxi        109.5833       35.1833           99       158     2012      01        26        026              0.131000      -3.875336       0.000000       0.171652   -9999.000000   -9999.000000       0.028800       0.012000
53941     53941     shaanxi        109.5833       35.1833           99       158     2012      01        27        027              0.132625      -1.681122       0.000000       0.187239       0.090000   -9999.000000       0.033200   -9999.000000
53941     53941     shaanxi        109.5833       35.1833           99       158     2012      01        28        028              0.135958      -0.885406       0.000000       0.191618       0.101000   -9999.000000       0.030500       0.126000
53941     53941     shaanxi        109.5833       35.1833           99       158     2012      01        29        029              0.138250       0.079865       0.000000       0.196534       0.099000   -9999.000000       0.037600       0.139000
53941     53941     shaanxi        109.5833       35.1833           99       158     2012      01        30        030              0.138250       0.106262       0.102383       0.196400   -9999.000000   -9999.000000   -9999.000000   -9999.000000
53941     53941     shaanxi        109.5833       35.1833           99       158     2012      01        31        031              0.143250       0.408051       0.000000       0.196467   -9999.000000   -9999.000000   -9999.000000       0.162000
53941     53941     shaanxi        109.5833       35.1833           99       158     2012      02        01        032              0.144042       2.491364       0.000000       0.207009       0.092000   -9999.000000       0.020300   -9999.000000
53941     53941     shaanxi        109.5833       35.1833           99       158     2012      02        02        033              0.138458      -0.835419       0.000000       0.190801       0.093000   -9999.000000       0.032900       0.104000
53941     53941     shaanxi        109.5833       35.1833           99       158     2012      02        03        034              0.138667      -1.805084       0.243388       0.182734       0.088000   -9999.000000       0.030500       0.080000
53941     53941     shaanxi        109.5833       35.1833           99       158     2012      02        04        035              0.140792       0.029999       0.000000       0.189562   -9999.000000   -9999.000000       0.036400       0.193000
53941     53941     shaanxi        109.5833       35.1833           99       158     2012      02        05        036              0.146125      -0.406891       0.000000       0.189032   -9999.000000   -9999.000000   -9999.000000       0.103000
53941     53941     shaanxi        109.5833       35.1833           99       158     2012      02        06        037              0.145458       1.287140       0.207882       0.197213       0.078000   -9999.000000       0.033000   -9999.000000
53941     53941     shaanxi        109.5833       35.1833           99       158     2012      02        07        038              0.136000      -2.183685       0.295877       0.183077   -9999.000000   -9999.000000       0.022700       0.004000
53941     53941     shaanxi        109.5833       35.1833           99       158     2012      02        08        039              0.134000      -3.863495       0.000000       0.168702   -9999.000000   -9999.000000       0.031300       0.027000
53941     53941     shaanxi        109.5833       35.1833           99       158     2012      02        09        040              0.134667      -4.495361       0.000000       0.164167   -9999.000000   -9999.000000       0.030400       0.057000
53941     53941     shaanxi        109.5833       35.1833           99       158     2012      02        10        041              0.138167      -3.450439       0.000000       0.168737   -9999.000000   -9999.000000       0.033300   -9999.000000
53941     53941     shaanxi        109.5833       35.1833           99       158     2012      02        11        042              0.143333      -2.128082       0.000000       0.178103       0.084000   -9999.000000   -9999.000000   -9999.000000
53941     53941     shaanxi        109.5833       35.1833           99       158     2012      02        12        043              0.151875      -0.035767       0.096795       0.187006   -9999.000000   -9999.000000   -9999.000000       0.085000
53941     53941     shaanxi        109.5833       35.1833           99       158     2012      02        13        044              0.150125      -0.648041       0.000000       0.186145       0.093000   -9999.000000   -9999.000000       0.083000
53941     53941     shaanxi        109.5833       35.1833           99       158     2012      02        14        045              0.158167       0.089050       0.000000       0.188649       0.088000   -9999.000000   -9999.000000       0.162000
53941     53941     shaanxi        109.5833       35.1833           99       158     2012      02        15        046              0.167375       1.980774       0.083733       0.196454   -9999.000000   -9999.000000       0.037300       0.011000
53941     53941     shaanxi        109.5833       35.1833           99       158     2012      02        16        047              0.167083       1.477997       0.000000       0.196178   -9999.000000   -9999.000000   -9999.000000   -9999.000000
53941     53941     shaanxi        109.5833       35.1833           99       158     2012      02        17        048              0.158333       0.184326       0.000000       0.187080       0.074000   -9999.000000   -9999.000000       0.010000
53941     53941     shaanxi        109.5833       35.1833           99       158     2012      02        18        049              0.154250      -1.713135       0.751722       0.179034       0.086000   -9999.000000       0.020400   -9999.000000
53941     53941     shaanxi        109.5833       35.1833           99       158     2012      02        19        050              0.158042      -0.656738       0.000000       0.180877       0.079000   -9999.000000       0.030600       0.127000
53941     53941     shaanxi        109.5833       35.1833           99       158     2012      02        20        051              0.166417       1.370636       0.000000       0.187628   -9999.000000   -9999.000000       0.032500   -9999.000000
53941     53941     shaanxi        109.5833       35.1833           99       158     2012      02        21        052              0.177417       2.652008       0.000000       0.192853   -9999.000000   -9999.000000   -9999.000000   -9999.000000
53941     53941     shaanxi        109.5833       35.1833           99       158     2012      02        22        053              0.190833       3.048828       0.400367       0.194558       0.066000   -9999.000000   -9999.000000       0.322000
53941     53941     shaanxi        109.5833       35.1833           99       158     2012      02        23        054              0.196667       4.456726       0.000000       0.197001   -9999.000000       0.038200       0.028000   -9999.000000
53941     53941     shaanxi        109.5833       35.1833           99       158     2012      02        24        055              0.201708       0.829773       0.000000       0.190669       0.082000   -9999.000000       0.026600       0.223000
53941     53941     shaanxi        109.5833       35.1833           99       158     2012      02        25        056              0.202167       1.890778       0.168580       0.192089   -9999.000000   -9999.000000       0.035500   -9999.000000
53941     53941     shaanxi        109.5833       35.1833           99       158     2012      02        26        057              0.202500      -0.027863       0.128106       0.186613   -9999.000000   -9999.000000       0.033400       0.184000
53941     53941     shaanxi        109.5833       35.1833           99       158     2012      02        27        058              0.202333       0.314606       0.000000       0.186873       0.073000   -9999.000000   -9999.000000       0.204000
53941     53941     shaanxi        109.5833       35.1833           99       158     2012      02        28        059              0.201875       1.399048       0.787562       0.189735       0.065000       0.099100   -9999.000000   -9999.000000
53941     53941     shaanxi        109.5833       35.1833           99       158     2012      02        29        060              0.000000   -9999.000000       0.000000   -9999.000000       0.079000   -9999.000000   -9999.000000   -9999.000000
53941     53941     shaanxi        109.5833       35.1833           99       158     2012      03        01        061              0.203792       1.684357       3.190947       0.192903       0.100000   -9999.000000       0.034900   -9999.000000
53941     53941     shaanxi        109.5833       35.1833           99       158     2012      03        02        062              0.202625       2.275635       0.206004       0.197004   -9999.000000   -9999.000000       0.031500       0.228000
53941     53941     shaanxi        109.5833       35.1833           99       158     2012      03        03        063              0.200292       1.537689       0.000000       0.197071   -9999.000000   -9999.000000       0.039200       0.314000
53941     53941     shaanxi        109.5833       35.1833           99       158     2012      03        04        064              0.198708       1.106506       0.247002       0.195061       0.090000       0.102200   -9999.000000       0.322000
53941     53941     shaanxi        109.5833       35.1833           99       158     2012      03        05        065              0.197792       1.539154       0.056003       0.195422       0.100000   -9999.000000   -9999.000000       0.324000
53941     53941     shaanxi        109.5833       35.1833           99       158     2012      03        06        066              0.195458       3.922333       0.000000       0.200367       0.087000   -9999.000000       0.022000   -9999.000000
53941     53941     shaanxi        109.5833       35.1833           99       158     2012      03        07        067              0.000000       2.052338       0.101760       0.194418   -9999.000000       0.008700       0.036500       0.358000
53941     53941     shaanxi        109.5833       35.1833           99       158     2012      03        08        068              0.193292       4.917755       1.003517       0.197152   -9999.000000   -9999.000000       0.034500       0.392000
53941     53941     shaanxi        109.5833       35.1833           99       158     2012      03        09        069              0.191458       3.970154       0.000000       0.195331       0.086000       0.123400       0.036700       0.399000
53941     53941     shaanxi        109.5833       35.1833           99       158     2012      03        10        070              0.190500       4.127045       0.165878       0.194027       0.096000   -9999.000000   -9999.000000       0.275000
53941     53941     shaanxi        109.5833       35.1833           99       158     2012      03        11        071              0.188542       7.027252       0.000000       0.194810       0.079000   -9999.000000       0.029900   -9999.000000
53941     53941     shaanxi        109.5833       35.1833           99       158     2012      03        12        072              0.186125       6.501770       0.000000       0.190870   -9999.000000       0.090200       0.021800       0.427000
53941     53941     shaanxi        109.5833       35.1833           99       158     2012      03        13        073              0.185625       6.229523       0.000000       0.187630   -9999.000000   -9999.000000       0.032800       0.328000
53941     53941     shaanxi        109.5833       35.1833           99       158     2012      03        14        074              0.184333       9.731842       0.000000       0.184357       0.076000       0.065300   -9999.000000       0.403000
53941     53941     shaanxi        109.5833       35.1833           99       158     2012      03        15        075              0.195917       9.541046       0.641174       0.181831   -9999.000000   -9999.000000       0.046500       0.562000
53941     53941     shaanxi        109.5833       35.1833           99       158     2012      03        16        076              0.197417       4.150604       0.000000       0.194471       0.087000   -9999.000000   -9999.000000   -9999.000000
53941     53941     shaanxi        109.5833       35.1833           99       158     2012      03        17        077              0.194042       9.805573       0.000000       0.190944   -9999.000000   -9999.000000       0.024600       0.547000
53941     53941     shaanxi        109.5833       35.1833           99       158     2012      03        18        078              0.189833      12.572357       0.000000       0.184154       0.088000   -9999.000000       0.034200   -9999.000000
53941     53941     shaanxi        109.5833       35.1833           99       158     2012      03        19        079              0.185208      12.671875       0.000000       0.178335       0.081500   -9999.000000       0.035400       0.346000
53941     53941     shaanxi        109.5833       35.1833           99       158     2012      03        20        080              0.183167       8.697266       0.061100       0.177864       0.077000   -9999.000000       0.045200   -9999.000000
53941     53941     shaanxi        109.5833       35.1833           99       158     2012      03        21        081              0.208667       7.605621       1.299961       0.179686       0.124000   -9999.000000   -9999.000000   -9999.000000
53941     53941     shaanxi        109.5833       35.1833           99       158     2012      03        22        082              0.225375       3.622711       0.117173       0.199045       0.115000       0.121700       0.048700       0.655000
53941     53941     shaanxi        109.5833       35.1833           99       158     2012      03        23        083              0.216250       5.003143       0.113329       0.204829   -9999.000000   -9999.000000       0.024900   -9999.000000
53941     53941     shaanxi        109.5833       35.1833           99       158     2012      03        24        084              0.207833       7.987335       0.000000       0.194173   -9999.000000   -9999.000000       0.030800       0.209000
53941     53941     shaanxi        109.5833       35.1833           99       158     2012      03        25        085              0.000000      11.083221       0.000000       0.184070       0.082000   -9999.000000       0.037800   -9999.000000
53941     53941     shaanxi        109.5833       35.1833           99       158     2012      03        26        086              0.195875      12.006165       0.000000       0.176961       0.076000   -9999.000000       0.045200       0.444000
53941     53941     shaanxi        109.5833       35.1833           99       158     2012      03        27        087              0.191500      12.630554       0.614085       0.173096       0.074000   -9999.000000   -9999.000000       0.433000
53941     53941     shaanxi        109.5833       35.1833           99       158     2012      03        28        088              0.209083      14.354980       1.598061       0.170094       0.110000   -9999.000000       0.057700   -9999.000000
53941     53941     shaanxi        109.5833       35.1833           99       158     2012      03        29        089              0.220875      11.158051       0.000000       0.189191       0.101000   -9999.000000       0.050900       0.478000
53941     53941     shaanxi        109.5833       35.1833           99       158     2012      03        30        090              0.207833      14.539978       0.000000       0.191348       0.077000       0.114000       0.042400   -9999.000000
53941     53941     shaanxi        109.5833       35.1833           99       158     2012      03        31        091              0.199042      10.418701       0.298055       0.182268       0.078000   -9999.000000       0.046200       0.431000
53941     53941     shaanxi        109.5833       35.1833           99       158     2012      04        01        092              0.192750      14.844727       0.000000       0.175365       0.088000       0.059100       0.046700       0.468000
53941     53941     shaanxi        109.5833       35.1833           99       158     2012      04        02        093              0.186542      15.785736       0.215754       0.171004   -9999.000000   -9999.000000   -9999.000000       0.395000
53941     53941     shaanxi        109.5833       35.1833           99       158     2012      04        03        094              0.180583      11.984924       0.000000       0.170205       0.091000       0.139200       0.032800       0.317000
53941     53941     shaanxi        109.5833       35.1833           99       158     2012      04        04        095              0.175458      14.265259       0.077294       0.166667       0.081500       0.209400       0.045900   -9999.000000
53941     53941     shaanxi        109.5833       35.1833           99       158     2012      04        05        096              0.169000      17.100067       0.000000       0.164991       0.080500   -9999.000000       0.038300       0.302000
53941     53941     shaanxi        109.5833       35.1833           99       158     2012      04        06        097              0.163750      16.170990       0.000000       0.163529       0.079000   -9999.000000       0.038700       0.404000
53941     53941     shaanxi        109.5833       35.1833           99       158     2012      04        07        098              0.159083      16.391052       0.000000       0.162710       0.078000   -9999.000000   -9999.000000       0.361000
53941     53941     shaanxi        109.5833       35.1833           99       158     2012      04        08        099              0.155042      17.298737       0.000000       0.162065       0.087000   -9999.000000       0.046500       0.281000
53941     53941     shaanxi        109.5833       35.1833           99       158     2012      04        09        100              0.151833      19.439789       1.220713       0.161265       0.102000       0.119800       0.047100   -9999.000000
53941     53941     shaanxi        109.5833       35.1833           99       158     2012      04        10        101              0.150875      16.755554       0.000000       0.172327       0.087500   -9999.000000       0.052200       0.353000
53941     53941     shaanxi        109.5833       35.1833           99       158     2012      04        11        102              0.148500      17.130890       3.593083       0.178219       0.091000   -9999.000000       0.044200   -9999.000000
53941     53941     shaanxi        109.5833       35.1833           99       158     2012      04        12        103              0.146042      15.976959       0.342569       0.185059       0.107000   -9999.000000       0.052200       0.260000
53941     53941     shaanxi        109.5833       35.1833           99       158     2012      04        13        104              0.145625      12.207520       0.000000       0.212077       0.096000   -9999.000000   -9999.000000       0.341000
53941     53941     shaanxi        109.5833       35.1833           99       158     2012      04        14        105              0.144458      16.019958       0.129013       0.188936       0.095000   -9999.000000       0.042300   -9999.000000
53941     53941     shaanxi        109.5833       35.1833           99       158     2012      04        15        106              0.143167      16.181854       0.000000       0.178306       0.090000   -9999.000000       0.040000       0.433000
53941     53941     shaanxi        109.5833       35.1833           99       158     2012      04        16        107              0.141000      19.918365       0.000000       0.169463       0.092500   -9999.000000       0.045500   -9999.000000
53941     53941     shaanxi        109.5833       35.1833           99       158     2012      04        17        108              0.139583      19.765533       0.028784       0.164839       0.081000       0.052100       0.054700       0.298000
53941     53941     shaanxi        109.5833       35.1833           99       158     2012      04        18        109              0.139167      16.422607       0.000000       0.165478       0.094000   -9999.000000   -9999.000000   -9999.000000
53941     53941     shaanxi        109.5833       35.1833           99       158     2012      04        19        110              0.138667      20.098602       1.757135       0.163610       0.102000   -9999.000000   -9999.000000   -9999.000000
53941     53941     shaanxi        109.5833       35.1833           99       158     2012      04        20        111              0.137875      20.037628       1.060649       0.175030       0.102000   -9999.000000       0.045200       0.721000
53941     53941     shaanxi        109.5833       35.1833           99       158     2012      04        21        112              0.139000      16.170135       0.000000       0.197011       0.100500   -9999.000000       0.051900   -9999.000000
53941     53941     shaanxi        109.5833       35.1833           99       158     2012      04        22        113              0.139167      20.877441       0.000000       0.181915       0.097000       0.155600   -9999.000000       0.407000
53941     53941     shaanxi        109.5833       35.1833           99       158     2012      04        23        114              0.145042      24.017822       1.150317       0.167598   -9999.000000   -9999.000000       0.057700   -9999.000000
53941     53941     shaanxi        109.5833       35.1833           99       158     2012      04        24        115              0.175333      23.073456       0.562695       0.171212       0.141000       0.169700   -9999.000000       0.981000
53941     53941     shaanxi        109.5833       35.1833           99       158     2012      04        25        116              0.000000      17.391998       0.064174       0.172948       0.110500   -9999.000000       0.069400       0.596000
53941     53941     shaanxi        109.5833       35.1833           99       158     2012      04        26        117              0.160333      18.700806       0.000000       0.162376       0.096000   -9999.000000       0.048000   -9999.000000
53941     53941     shaanxi        109.5833       35.1833           99       158     2012      04        27        118              0.152875      22.304718       0.000000       0.158491       0.091000       0.143000       0.052800       0.417000
53941     53941     shaanxi        109.5833       35.1833           99       158     2012      04        28        119              0.146833      23.832489       0.140365       0.156818       0.086000   -9999.000000       0.051900   -9999.000000
53941     53941     shaanxi        109.5833       35.1833           99       158     2012      04        29        120              0.143000      25.364532       0.000000       0.156073       0.104000   -9999.000000       0.058900       0.356000
53941     53941     shaanxi        109.5833       35.1833           99       158     2012      04        30        121              0.140208      25.050446       0.000000       0.156355       0.145000       0.065700   -9999.000000       0.592000
53941     53941     shaanxi        109.5833       35.1833           99       158     2012      05        01        122              0.143625      19.421356       3.751616       0.158965       0.186000   -9999.000000       0.086600       0.719000
53941     53941     shaanxi        109.5833       35.1833           99       158     2012      05        02        123              0.150667      16.801941       0.000000       0.205628       0.152000       0.099600       0.073300       0.528000
53941     53941     shaanxi        109.5833       35.1833           99       158     2012      05        03        124              0.148542      21.158905       0.000000       0.198178       0.124000   -9999.000000       0.063600   -9999.000000
53941     53941     shaanxi        109.5833       35.1833           99       158     2012      05        04        125              0.144625      21.248627       0.000000       0.180581       0.137000   -9999.000000       0.072500       0.397000
53941     53941     shaanxi        109.5833       35.1833           99       158     2012      05        05        126              0.140917      23.591003       0.000000       0.167067       0.128000   -9999.000000   -9999.000000       0.466000
53941     53941     shaanxi        109.5833       35.1833           99       158     2012      05        06        127              0.138792      25.568146       1.634152       0.160462       0.124000   -9999.000000   -9999.000000       0.384000
53941     53941     shaanxi        109.5833       35.1833           99       158     2012      05        07        128              0.137958      25.394714       0.322633       0.166877   -9999.000000       0.030100       0.067800       0.687000
53941     53941     shaanxi        109.5833       35.1833           99       158     2012      05        08        129              0.136708      23.987396       0.165623       0.178417       0.116000   -9999.000000       0.074700   -9999.000000
53941     53941     shaanxi        109.5833       35.1833           99       158     2012      05        09        130              0.134625      26.335663       2.996656       0.166369   -9999.000000   -9999.000000       0.070500       0.552000
53941     53941     shaanxi        109.5833       35.1833           99       158     2012      05        10        131              0.134125      24.684784       2.767227       0.160954       0.135000   -9999.000000       0.075400       0.350000
53941     53941     shaanxi        109.5833       35.1833           99       158     2012      05        11        132              0.133708      27.104889       6.527975       0.164393       0.199000   -9999.000000   -9999.000000       0.747000
53941     53941     shaanxi        109.5833       35.1833           99       158     2012      05        12        133              0.134167      19.024597       1.378223       0.260114       0.166000       0.104900       0.087800       0.570000
53941     53941     shaanxi        109.5833       35.1833           99       158     2012      05        13        134              0.133917      17.884583       0.167975       0.224376       0.143000   -9999.000000       0.066800   -9999.000000
53941     53941     shaanxi        109.5833       35.1833           99       158     2012      05        14        135              0.133708      18.566650       0.000000       0.204253   -9999.000000   -9999.000000       0.089200       0.474000
53941     53941     shaanxi        109.5833       35.1833           99       158     2012      05        15        136              0.132500      20.907410       0.000000       0.184786       0.156000       0.015100       0.079300   -9999.000000
53941     53941     shaanxi        109.5833       35.1833           99       158     2012      05        16        137              0.131417      22.363922       0.000000       0.170694       0.143000   -9999.000000       0.088000       0.311000
53941     53941     shaanxi        109.5833       35.1833           99       158     2012      05        17        138              0.130667      23.355072       0.431654       0.164175       0.132000   -9999.000000   -9999.000000   -9999.000000
53941     53941     shaanxi        109.5833       35.1833           99       158     2012      05        18        139              0.129958      24.985931       0.000000       0.161169       0.143000   -9999.000000       0.078300   -9999.000000
53941     53941     shaanxi        109.5833       35.1833           99       158     2012      05        19        140              0.129625      25.538879       0.000000       0.159692       0.130000   -9999.000000       0.091500       0.516000
53941     53941     shaanxi        109.5833       35.1833           99       158     2012      05        20        141              0.128875      27.710724       0.503742       0.158082   -9999.000000   -9999.000000       0.072800   -9999.000000
53941     53941     shaanxi        109.5833       35.1833           99       158     2012      05        21        142              0.127000      27.140259       2.791881       0.158530   -9999.000000   -9999.000000       0.125500       0.737000
53941     53941     shaanxi        109.5833       35.1833           99       158     2012      05        22        143              0.128208      18.454315       0.276394       0.193205       0.196000       0.121100   -9999.000000   -9999.000000
53941     53941     shaanxi        109.5833       35.1833           99       158     2012      05        23        144              0.129000      20.110107       0.130600       0.193693   -9999.000000       0.127800   -9999.000000       0.538000
53941     53941     shaanxi        109.5833       35.1833           99       158     2012      05        24        145              0.128250      20.203156       0.000000       0.177446       0.182000   -9999.000000       0.074300       0.459000
53941     53941     shaanxi        109.5833       35.1833           99       158     2012      05        25        146              0.000000      18.888336       0.000000       0.169036       0.189000       0.058300       0.098000   -9999.000000
53941     53941     shaanxi        109.5833       35.1833           99       158     2012      05        26        147              0.128875      22.786804       1.116143       0.161394       0.163000   -9999.000000       0.084900       0.341000
53941     53941     shaanxi        109.5833       35.1833           99       158     2012      05        27        148              0.128333      26.196442       1.805115       0.156765       0.171000   -9999.000000       0.092600   -9999.000000
53941     53941     shaanxi        109.5833       35.1833           99       158     2012      05        28        149              0.132583      26.644165      10.599609       0.167051   -9999.000000       0.117800   -9999.000000       0.373000
53941     53941     shaanxi        109.5833       35.1833           99       158     2012      05        29        150              0.151708      22.431396       0.905944       0.215367       0.173000   -9999.000000       0.094200       0.606000
53941     53941     shaanxi        109.5833       35.1833           99       158     2012      05        30        151              0.145708      23.121002       0.552038       0.239909   -9999.000000       0.176700       0.082400   -9999.000000
53941     53941     shaanxi        109.5833       35.1833           99       158     2012      05        31        152              0.139583      24.423859       0.000000       0.209679       0.186000   -9999.000000       0.083000   -9999.000000
53941     53941     shaanxi        109.5833       35.1833           99       158     2012      06        01        153              0.136167      22.169373       0.787538       0.194622       0.142500   -9999.000000       0.079700   -9999.000000
53941     53941     shaanxi        109.5833       35.1833           99       158     2012      06        02        154              0.132833      24.678619       0.000000       0.184501       0.140000       0.067400       0.086600       0.491000
53941     53941     shaanxi        109.5833       35.1833           99       158     2012      06        03        155              0.130333      25.630005       0.000000       0.174117       0.149000   -9999.000000   -9999.000000       0.463000
53941     53941     shaanxi        109.5833       35.1833           99       158     2012      06        04        156              0.129125      26.074310       0.000000       0.165649       0.143000   -9999.000000       0.082000       0.501000
53941     53941     shaanxi        109.5833       35.1833           99       158     2012      06        05        157              0.127500      27.599487       4.095901       0.161510       0.185000   -9999.000000       0.104600       0.635000
53941     53941     shaanxi        109.5833       35.1833           99       158     2012      06        06        158              0.126917      22.993896       0.719186       0.202110       0.170000   -9999.000000       0.087600   -9999.000000
53941     53941     shaanxi        109.5833       35.1833           99       158     2012      06        07        159              0.127708      21.681152       0.000000       0.207301       0.150000       0.074200       0.090000       0.587000
53941     53941     shaanxi        109.5833       35.1833           99       158     2012      06        08        160              0.126750      26.100922       0.000000       0.180796       0.138000   -9999.000000   -9999.000000   -9999.000000
53941     53941     shaanxi        109.5833       35.1833           99       158     2012      06        09        161              0.126917      25.750946       0.000000       0.167583       0.126000   -9999.000000   -9999.000000       0.531000
53941     53941     shaanxi        109.5833       35.1833           99       158     2012      06        10        162              0.125542      29.573730       0.000000       0.160336       0.143000       0.089800       0.068700       0.384000
53941     53941     shaanxi        109.5833       35.1833           99       158     2012      06        11        163              0.000000      27.784363       0.000000       0.157336       0.148000   -9999.000000       0.117700   -9999.000000
53941     53941     shaanxi        109.5833       35.1833           99       158     2012      06        12        164              0.124167      28.351105       0.798560       0.154540       0.141000   -9999.000000       0.119900       0.575000
53941     53941     shaanxi        109.5833       35.1833           99       158     2012      06        13        165              0.123583      30.113678       0.000000       0.152923       0.145500   -9999.000000       0.126000   -9999.000000
53941     53941     shaanxi        109.5833       35.1833           99       158     2012      06        14        166              0.122458      31.597626       0.000000       0.151698       0.138000   -9999.000000   -9999.000000       0.496000
53941     53941     shaanxi        109.5833       35.1833           99       158     2012      06        15        167              0.121417      27.995636       0.059879       0.151136       0.145000       0.163600       0.126600   -9999.000000
53941     53941     shaanxi        109.5833       35.1833           99       158     2012      06        16        168              0.120917      28.409607       0.000000       0.150496       0.149000   -9999.000000       0.110300   -9999.000000
53941     53941     shaanxi        109.5833       35.1833           99       158     2012      06        17        169              0.120500      29.542603       0.000000       0.149550       0.144000       0.166300       0.120900       0.509000
53941     53941     shaanxi        109.5833       35.1833           99       158     2012      06        18        170              0.120500      30.876099       7.156633       0.149461       0.135000   -9999.000000       0.090600   -9999.000000
53941     53941     shaanxi        109.5833       35.1833           99       158     2012      06        19        171              0.136375      29.151031       4.480989       0.176004       0.180000   -9999.000000       0.120900       0.756000
53941     53941     shaanxi        109.5833       35.1833           99       158     2012      06        20        172              0.146125      22.957733       0.000000       0.262697   -9999.000000       0.202500   -9999.000000   -9999.000000
53941     53941     shaanxi        109.5833       35.1833           99       158     2012      06        21        173              0.143250      26.868225       1.166206       0.215554       0.156000   -9999.000000       0.092300       0.489000
53941     53941     shaanxi        109.5833       35.1833           99       158     2012      06        22        174              0.137875      28.137970       0.000000       0.195968       0.152000   -9999.000000       0.097300       0.526000
53941     53941     shaanxi        109.5833       35.1833           99       158     2012      06        23        175              0.132917      29.462280       1.205115       0.179873       0.150500   -9999.000000       0.089200   -9999.000000
53941     53941     shaanxi        109.5833       35.1833           99       158     2012      06        24        176              0.129917      31.329285       4.917218       0.171657       0.163000   -9999.000000       0.104300       0.671000
53941     53941     shaanxi        109.5833       35.1833           99       158     2012      06        25        177              0.141333      27.869568       6.438880       0.203417       0.207000       0.159100   -9999.000000   -9999.000000
53941     53941     shaanxi        109.5833       35.1833           99       158     2012      06        26        178              0.147583      24.400513       1.358896       0.269933       0.193000   -9999.000000       0.130600       0.673000
53941     53941     shaanxi        109.5833       35.1833           99       158     2012      06        27        179              0.145125      23.797852       0.200700       0.236077       0.179500   -9999.000000       0.098500       0.638000
53941     53941     shaanxi        109.5833       35.1833           99       158     2012      06        28        180              0.141792      23.738129       3.386140       0.216492       0.175000   -9999.000000       0.143700       0.569000
53941     53941     shaanxi        109.5833       35.1833           99       158     2012      06        29        181              0.156583      23.693634       6.422538       0.214474       0.202000   -9999.000000       0.133100       1.000000
53941     53941     shaanxi        109.5833       35.1833           99       158     2012      06        30        182              0.156542      23.679565       0.584760       0.276596       0.169000       0.149300       0.124100   -9999.000000
53941     53941     shaanxi        109.5833       35.1833           99       158     2012      07        01        183              0.149083      26.998810       2.260128       0.232153   -9999.000000   -9999.000000   -9999.000000       0.675000
53941     53941     shaanxi        109.5833       35.1833           99       158     2012      07        02        184              0.149083      28.628876       0.994516       0.209654       0.199000   -9999.000000       0.119100       0.713000
53941     53941     shaanxi        109.5833       35.1833           99       158     2012      07        03        185              0.147208      25.957703       7.685348       0.224101       0.148000       0.122600       0.109100       0.567000
53941     53941     shaanxi        109.5833       35.1833           99       158     2012      07        04        186              0.157625      27.993866       0.683334       0.219362       0.233000   -9999.000000       0.136800       0.766000
53941     53941     shaanxi        109.5833       35.1833           99       158     2012      07        05        187              0.156583      24.305756       0.367699       0.257944       0.165000       0.006200       0.132500   -9999.000000
53941     53941     shaanxi        109.5833       35.1833           99       158     2012      07        06        188              0.149458      27.509094       0.448605       0.221674   -9999.000000   -9999.000000       0.117600       0.668000
53941     53941     shaanxi        109.5833       35.1833           99       158     2012      07        07        189              0.144208      27.512543       0.288117       0.200584   -9999.000000   -9999.000000   -9999.000000   -9999.000000
53941     53941     shaanxi        109.5833       35.1833           99       158     2012      07        08        190              0.170333      27.254791      19.199326       0.190828       0.214000       0.263800       0.117900       0.866000
53941     53941     shaanxi        109.5833       35.1833           99       158     2012      07        09        191              0.226583      23.619019       8.854620       0.302570       0.244000   -9999.000000       0.144400       1.000000
53941     53941     shaanxi        109.5833       35.1833           99       158     2012      07        10        192              0.212792      23.406067       0.000000       0.314271       0.181000   -9999.000000       0.140900   -9999.000000
53941     53941     shaanxi        109.5833       35.1833           99       158     2012      07        11        193              0.196375      28.178711       0.979984       0.272330       0.175000       0.215200       0.130400       0.824000
53941     53941     shaanxi        109.5833       35.1833           99       158     2012      07        12        194              0.183125      26.668457       0.444435       0.254769       0.178000   -9999.000000   -9999.000000   -9999.000000
53941     53941     shaanxi        109.5833       35.1833           99       158     2012      07        13        195              0.165875      28.607330       1.128664       0.232353       0.221000       0.079500       0.137700       0.738000
53941     53941     shaanxi        109.5833       35.1833           99       158     2012      07        14        196              0.161042      26.686035       0.053493       0.224614       0.186000   -9999.000000       0.111000   -9999.000000
53941     53941     shaanxi        109.5833       35.1833           99       158     2012      07        15        197              0.156167      26.838379       0.000000       0.211741       0.171000       0.082700       0.131600   -9999.000000
53941     53941     shaanxi        109.5833       35.1833           99       158     2012      07        16        198              0.150917      27.875549       1.424809       0.196370       0.159000       0.102900       0.132100       0.642000
53941     53941     shaanxi        109.5833       35.1833           99       158     2012      07        17        199              0.145833      27.638153       0.000000       0.184575       0.189000       0.332400       0.137000   -9999.000000
53941     53941     shaanxi        109.5833       35.1833           99       158     2012      07        18        200              0.142208      26.990112       0.309131       0.176713       0.191000       0.101600   -9999.000000       0.581000
53941     53941     shaanxi        109.5833       35.1833           99       158     2012      07        19        201              0.139042      28.569885       0.169513       0.171424       0.168000   -9999.000000       0.126400   -9999.000000
53941     53941     shaanxi        109.5833       35.1833           99       158     2012      07        20        202              0.137174      28.962738       1.329737       0.168727       0.169000   -9999.000000       0.135800       0.425000
53941     53941     shaanxi        109.5833       35.1833           99       158     2012      07        21        203              0.135348      29.353851       5.148367       0.166840   -9999.000000   -9999.000000       0.133100       0.924000
53941     53941     shaanxi        109.5833       35.1833           99       158     2012      07        22        204              0.134417      25.270416       0.094430       0.215158   -9999.000000   -9999.000000       0.137400   -9999.000000
53941     53941     shaanxi        109.5833       35.1833           99       158     2012      07        23        205              0.132500      27.961151       1.797077       0.203471       0.248000       0.075800   -9999.000000       0.650000
53941     53941     shaanxi        109.5833       35.1833           99       158     2012      07        24        206              0.132500      25.973846       0.814109       0.192948       0.212000   -9999.000000   -9999.000000   -9999.000000
53941     53941     shaanxi        109.5833       35.1833           99       158     2012      07        25        207              0.131958      26.560181       0.172832       0.211158       0.214000       0.127900       0.089600       0.611000
53941     53941     shaanxi        109.5833       35.1833           99       158     2012      07        26        208              0.131708      28.169373       0.268407       0.191796   -9999.000000   -9999.000000       0.120100       0.723000
53941     53941     shaanxi        109.5833       35.1833           99       158     2012      07        27        209              0.130458      30.514709       1.058650       0.177427       0.166000   -9999.000000       0.109000       0.587000
53941     53941     shaanxi        109.5833       35.1833           99       158     2012      07        28        210              0.129000      31.961395       0.161253       0.166637       0.207000       0.115000       0.114700       0.546000
53941     53941     shaanxi        109.5833       35.1833           99       158     2012      07        29        211              0.127667      33.826843       0.444468       0.161417       0.208000   -9999.000000   -9999.000000   -9999.000000
53941     53941     shaanxi        109.5833       35.1833           99       158     2012      07        30        212              0.180417      33.989258      20.304754       0.161949       0.270000   -9999.000000       0.096200       0.938000
53941     53941     shaanxi        109.5833       35.1833           99       158     2012      07        31        213              0.235583      28.294556       0.221139       0.269215       0.243000       0.292200       0.080100       0.844000
53941     53941     shaanxi        109.5833       35.1833           99       158     2012      08        01        214              0.223833      25.028473       1.177152       0.277886       0.206000   -9999.000000       0.093800       0.878000
53941     53941     shaanxi        109.5833       35.1833           99       158     2012      08        02        215              0.215375      26.119812       0.729374       0.251802   -9999.000000   -9999.000000       0.092300       0.728000
53941     53941     shaanxi        109.5833       35.1833           99       158     2012      08        03        216              0.207042      27.566193       0.000000       0.231287       0.210000       0.123700       0.090600   -9999.000000
53941     53941     shaanxi        109.5833       35.1833           99       158     2012      08        04        217              0.197958      28.704071       0.407532       0.210441       0.179500       0.245900   -9999.000000       0.685000
53941     53941     shaanxi        109.5833       35.1833           99       158     2012      08        05        218              0.190750      28.866547       1.303799       0.193445       0.198000       0.026500       0.082400   -9999.000000
53941     53941     shaanxi        109.5833       35.1833           99       158     2012      08        06        219              0.184625      27.127747       1.018721       0.189265       0.190000   -9999.000000       0.111100       0.593000
53941     53941     shaanxi        109.5833       35.1833           99       158     2012      08        07        220              0.177917      27.196594       0.000000       0.194133       0.167000   -9999.000000       0.095100       0.610000
53941     53941     shaanxi        109.5833       35.1833           99       158     2012      08        08        221              0.172917      30.425903       4.717508       0.176903       0.219000       0.193600       0.106200   -9999.000000
53941     53941     shaanxi        109.5833       35.1833           99       158     2012      08        09        222              0.170750      28.606262       2.405011       0.220338       0.204500   -9999.000000   -9999.000000       0.622000
53941     53941     shaanxi        109.5833       35.1833           99       158     2012      08        10        223              0.165250      27.946838       0.000000       0.209119       0.187500       0.198000   -9999.000000   -9999.000000
53941     53941     shaanxi        109.5833       35.1833           99       158     2012      08        11        224              0.159750      28.131409       1.423790       0.186837       0.187000   -9999.000000       0.094900       0.630000
53941     53941     shaanxi        109.5833       35.1833           99       158     2012      08        12        225              0.156875      30.999512       0.535279       0.175135       0.180000   -9999.000000       0.107900   -9999.000000
53941     53941     shaanxi        109.5833       35.1833           99       158     2012      08        13        226              0.154542      28.072968       2.051899       0.190532       0.220000       0.197900       0.119400   -9999.000000
53941     53941     shaanxi        109.5833       35.1833           99       158     2012      08        14        227              0.153875      23.823181       0.648393       0.199677       0.231000   -9999.000000       0.127400       0.780000
53941     53941     shaanxi        109.5833       35.1833           99       158     2012      08        15        228              0.153250      24.496948       0.207313       0.202172       0.182500       0.140100   -9999.000000   -9999.000000
53941     53941     shaanxi        109.5833       35.1833           99       158     2012      08        16        229              0.150458      27.593933       0.291426       0.182653       0.191500   -9999.000000       0.109900       0.642000
53941     53941     shaanxi        109.5833       35.1833           99       158     2012      08        17        230              0.185125      27.936035      31.029070       0.170753       0.177000   -9999.000000       0.095200   -9999.000000
53941     53941     shaanxi        109.5833       35.1833           99       158     2012      08        18        231              0.249917      27.335388       9.075373       0.246498   -9999.000000       0.136300       0.127100       1.000000
53941     53941     shaanxi        109.5833       35.1833           99       158     2012      08        19        232              0.249375      21.498779       6.716449       0.330085       0.237000   -9999.000000       0.145700       0.983000
53941     53941     shaanxi        109.5833       35.1833           99       158     2012      08        20        233              0.234458      21.079987       0.578348       0.321317       0.258000       0.084600       0.103100   -9999.000000
53941     53941     shaanxi        109.5833       35.1833           99       158     2012      08        21        234              0.220750      22.268097       0.279744       0.296461       0.225000       0.081500   -9999.000000       0.961000
53941     53941     shaanxi        109.5833       35.1833           99       158     2012      08        22        235              0.209667      21.475037       9.283895       0.276406       0.189000       0.205700       0.086900   -9999.000000
53941     53941     shaanxi        109.5833       35.1833           99       158     2012      08        23        236              0.199500      22.469543       1.438256       0.262076       0.195000       0.190600       0.096700       0.726000
53941     53941     shaanxi        109.5833       35.1833           99       158     2012      08        24        237              0.190792      22.478485      15.329971       0.247581   -9999.000000   -9999.000000       0.090700   -9999.000000
53941     53941     shaanxi        109.5833       35.1833           99       158     2012      08        25        238              0.000000      23.844299       2.217606       0.234105   -9999.000000       0.090500       0.102000   -9999.000000
53941     53941     shaanxi        109.5833       35.1833           99       158     2012      08        26        239              0.192792      24.665039       1.067548       0.231316       0.212000       0.274600   -9999.000000       0.672000
53941     53941     shaanxi        109.5833       35.1833           99       158     2012      08        27        240              0.186625      24.691925       1.606566       0.241798       0.223000   -9999.000000       0.126200   -9999.000000
53941     53941     shaanxi        109.5833       35.1833           99       158     2012      08        28        241              0.179292      24.450806       0.000000       0.235509       0.196000       0.160700       0.092700       0.694000
53941     53941     shaanxi        109.5833       35.1833           99       158     2012      08        29        242              0.172042      25.296143       0.932743       0.221687   -9999.000000   -9999.000000       0.109400       0.611000
53941     53941     shaanxi        109.5833       35.1833           99       158     2012      08        30        243              0.165708      26.509705       4.114206       0.203473   -9999.000000       0.137900       0.098500       0.647000
53941     53941     shaanxi        109.5833       35.1833           99       158     2012      08        31        244              0.214208      27.285706      20.914133       0.200929       0.243000   -9999.000000       0.150000       0.968000
53941     53941     shaanxi        109.5833       35.1833           99       158     2012      09        01        245              0.256417      20.921997      25.312456       0.319785       0.231000   -9999.000000   -9999.000000   -9999.000000
53941     53941     shaanxi        109.5833       35.1833           99       158     2012      09        02        246              0.230250      18.764465       2.304832       0.356827       0.187000       0.228200       0.122300       0.819000
53941     53941     shaanxi        109.5833       35.1833           99       158     2012      09        03        247              0.215958      20.701904       0.868471       0.316395       0.179000   -9999.000000       0.105800   -9999.000000
53941     53941     shaanxi        109.5833       35.1833           99       158     2012      09        04        248              0.205083      21.918304       0.000000       0.297875       0.201000       0.216200       0.113500       0.666000
53941     53941     shaanxi        109.5833       35.1833           99       158     2012      09        05        249              0.196708      22.839081       0.000000       0.283834       0.191000       0.159200       0.116000       0.685000
53941     53941     shaanxi        109.5833       35.1833           99       158     2012      09        06        250              0.190417      23.555237       4.577067       0.274438       0.192500   -9999.000000       0.099900   -9999.000000
53941     53941     shaanxi        109.5833       35.1833           99       158     2012      09        07        251              0.190042      21.789917       4.582632       0.281525       0.187000   -9999.000000   -9999.000000       0.900000
53941     53941     shaanxi        109.5833       35.1833           99       158     2012      09        08        252              0.201750      22.627136       1.256749       0.287824       0.205000       0.052700       0.103200   -9999.000000
53941     53941     shaanxi        109.5833       35.1833           99       158     2012      09        09        253              0.193750      22.116913       0.079461       0.286029       0.193000       0.125600       0.116000       0.668000
53941     53941     shaanxi        109.5833       35.1833           99       158     2012      09        10        254              0.249125      22.549896      33.495285       0.268920       0.241000       0.133500       0.144600   -9999.000000
53941     53941     shaanxi        109.5833       35.1833           99       158     2012      09        11        255              0.234500      18.697083       2.695861       0.359666       0.228000   -9999.000000       0.151200   -9999.000000
53941     53941     shaanxi        109.5833       35.1833           99       158     2012      09        12        256              0.218292      20.343201       0.798218       0.330785       0.222000       0.166800   -9999.000000       0.794000
53941     53941     shaanxi        109.5833       35.1833           99       158     2012      09        13        257              0.206708      17.050964       0.000000       0.315006       0.194000       0.160200       0.134700   -9999.000000
53941     53941     shaanxi        109.5833       35.1833           99       158     2012      09        14        258              0.196667      17.356232       0.221722       0.302311   -9999.000000   -9999.000000       0.102800       0.547000
53941     53941     shaanxi        109.5833       35.1833           99       158     2012      09        15        259              0.189917      17.793976       0.248969       0.293262       0.212000       0.107600       0.141800   -9999.000000
53941     53941     shaanxi        109.5833       35.1833           99       158     2012      09        16        260              0.188375      18.404999       0.000000       0.288586       0.215000   -9999.000000       0.131900       0.700000
53941     53941     shaanxi        109.5833       35.1833           99       158     2012      09        17        261              0.184708      18.084534       0.000000       0.286415       0.195000   -9999.000000       0.129500       0.661000
53941     53941     shaanxi        109.5833       35.1833           99       158     2012      09        18        262              0.178917      18.642151       0.000000       0.281537       0.188000   -9999.000000   -9999.000000   -9999.000000
53941     53941     shaanxi        109.5833       35.1833           99       158     2012      09        19        263              0.173042      19.519440       0.329334       0.273667       0.179000   -9999.000000       0.118000       0.597000
53941     53941     shaanxi        109.5833       35.1833           99       158     2012      09        20        264              0.174917      20.215912       5.395006       0.265404       0.254000       0.031300       0.133700   -9999.000000
53941     53941     shaanxi        109.5833       35.1833           99       158     2012      09        21        265              0.181208      18.385925       0.000000       0.289844   -9999.000000   -9999.000000       0.121700       0.866000
53941     53941     shaanxi        109.5833       35.1833           99       158     2012      09        22        266              0.179667      19.769989       0.379604       0.285531       0.168000       0.293800       0.140100       0.772000
53941     53941     shaanxi        109.5833       35.1833           99       158     2012      09        23        267              0.177250      19.692444       1.641819       0.277023       0.170500   -9999.000000   -9999.000000       0.720000
53941     53941     shaanxi        109.5833       35.1833           99       158     2012      09        24        268              0.175000      20.039276       0.000000       0.269843       0.149000   -9999.000000   -9999.000000       0.683000
53941     53941     shaanxi        109.5833       35.1833           99       158     2012      09        25        269              0.194625      19.572968      11.376390       0.265713   -9999.000000       0.108400       0.121800   -9999.000000
53941     53941     shaanxi        109.5833       35.1833           99       158     2012      09        26        270              0.202042      16.372040       0.000000       0.316269       0.197000       0.063900       0.142300       0.831000
53941     53941     shaanxi        109.5833       35.1833           99       158     2012      09        27        271              0.195071      17.157013       0.000000       0.297386       0.169500       0.241000       0.141500       0.706000
53941     53941     shaanxi        109.5833       35.1833           99       158     2012      09        28        272              0.179533      16.575836       0.000000       0.284550       0.161000   -9999.000000       0.135700       0.781000
53941     53941     shaanxi        109.5833       35.1833           99       158     2012      09        29        273              0.174375      14.193085       0.000000       0.275754       0.156000   -9999.000000   -9999.000000       0.590000
53941     53941     shaanxi        109.5833       35.1833           99       158     2012      09        30        274              0.168542      15.908264       0.000000       0.269097       0.151000   -9999.000000       0.142100   -9999.000000
53941     53941     shaanxi        109.5833       35.1833           99       158     2012      10        01        275              0.153458      16.415070       0.800205       0.262410       0.160000   -9999.000000       0.091800       0.671000
53941     53941     shaanxi        109.5833       35.1833           99       158     2012      10        02        276              0.150167      17.725861       0.551065       0.256523       0.160000   -9999.000000       0.111900   -9999.000000
53941     53941     shaanxi        109.5833       35.1833           99       158     2012      10        03        277              0.148458      17.762177       1.358948       0.255982       0.149000       0.051100       0.099400       0.560000
53941     53941     shaanxi        109.5833       35.1833           99       158     2012      10        04        278              0.146500      18.963165       0.849002       0.249937       0.166000   -9999.000000       0.108900       0.539000
53941     53941     shaanxi        109.5833       35.1833           99       158     2012      10        05        279              0.145167      16.597595       0.270242       0.251833       0.150000   -9999.000000   -9999.000000   -9999.000000
53941     53941     shaanxi        109.5833       35.1833           99       158     2012      10        06        280              0.143250      16.931396       0.056743       0.246475       0.164000   -9999.000000       0.099900       0.641000
53941     53941     shaanxi        109.5833       35.1833           99       158     2012      10        07        281              0.142000      17.035492       0.000000       0.241337       0.163000   -9999.000000       0.109700   -9999.000000
53941     53941     shaanxi        109.5833       35.1833           99       158     2012      10        08        282              0.142417      15.235199       1.222910       0.242773       0.160000       0.126100       0.081800       0.549000
53941     53941     shaanxi        109.5833       35.1833           99       158     2012      10        09        283              0.140875      15.480865       0.000000       0.242250       0.151500   -9999.000000       0.093700   -9999.000000
53941     53941     shaanxi        109.5833       35.1833           99       158     2012      10        10        284              0.139000      15.881500       0.000000       0.234873       0.150000   -9999.000000   -9999.000000   -9999.000000
53941     53941     shaanxi        109.5833       35.1833           99       158     2012      10        11        285              0.137875      16.539795       0.000000       0.228838   -9999.000000       0.117800   -9999.000000       0.682000
53941     53941     shaanxi        109.5833       35.1833           99       158     2012      10        12        286              0.137000      17.285004       0.000000       0.225583       0.120000   -9999.000000       0.060800   -9999.000000
53941     53941     shaanxi        109.5833       35.1833           99       158     2012      10        13        287              0.135875      16.271393       0.000000       0.223746       0.119500   -9999.000000       0.090100       0.484000
53941     53941     shaanxi        109.5833       35.1833           99       158     2012      10        14        288              0.134917      16.816956       0.000000       0.217961       0.118500       0.005300       0.080200   -9999.000000
53941     53941     shaanxi        109.5833       35.1833           99       158     2012      10        15        289              0.135042      15.258362       2.726637       0.217688       0.134000   -9999.000000       0.093900       0.543000
53941     53941     shaanxi        109.5833       35.1833           99       158     2012      10        16        290              0.135750      14.375366       0.531252       0.230052       0.132000       0.098500   -9999.000000       0.668000
53941     53941     shaanxi        109.5833       35.1833           99       158     2012      10        17        291              0.134792      11.912018       0.449369       0.244757       0.134000   -9999.000000       0.094300   -9999.000000
53941     53941     shaanxi        109.5833       35.1833           99       158     2012      10        18        292              0.134667      11.943451       0.736155       0.232029       0.140000       0.135300       0.089900       0.624000
53941     53941     shaanxi        109.5833       35.1833           99       158     2012      10        19        293              0.135500      11.522339       0.338375       0.237397       0.127000       0.083300       0.102200   -9999.000000
53941     53941     shaanxi        109.5833       35.1833           99       158     2012      10        20        294              0.135250      13.892914       0.000000       0.233082       0.138500   -9999.000000       0.109100       0.551000
53941     53941     shaanxi        109.5833       35.1833           99       158     2012      10        21        295              0.136250      16.208344       2.455227       0.227174   -9999.000000       0.036600       0.115200       0.710000
53941     53941     shaanxi        109.5833       35.1833           99       158     2012      10        22        296              0.138292       9.704407       0.018526       0.250698   -9999.000000   -9999.000000   -9999.000000       0.752000
53941     53941     shaanxi        109.5833       35.1833           99       158     2012      10        23        297              0.138000      10.769684       0.096228       0.242325   -9999.000000   -9999.000000       0.073700       0.530000
53941     53941     shaanxi        109.5833       35.1833           99       158     2012      10        24        298              0.137875       7.877625       3.668471       0.239674   -9999.000000   -9999.000000       0.087100   -9999.000000
53941     53941     shaanxi        109.5833       35.1833           99       158     2012      10        25        299              0.000000      10.948364       1.406411       0.234352       0.145000   -9999.000000       0.079400       0.584000
53941     53941     shaanxi        109.5833       35.1833           99       158     2012      10        26        300              0.136250      12.429169       0.000000       0.229356       0.141000       0.142400       0.096400       0.602000
53941     53941     shaanxi        109.5833       35.1833           99       158     2012      10        27        301              0.134958      11.907562       0.000000       0.227373       0.141000   -9999.000000   -9999.000000       0.636000
53941     53941     shaanxi        109.5833       35.1833           99       158     2012      10        28        302              0.000000      12.541840       0.448263       0.222764       0.159000   -9999.000000       0.093700       0.554000
53941     53941     shaanxi        109.5833       35.1833           99       158     2012      10        29        303              0.133833      11.849152       0.000000       0.223666       0.156000       0.101500       0.056800   -9999.000000
53941     53941     shaanxi        109.5833       35.1833           99       158     2012      10        30        304              0.131917      11.348236       0.115015       0.222538       0.137000   -9999.000000       0.074200       0.473000
53941     53941     shaanxi        109.5833       35.1833           99       158     2012      10        31        305              0.130792       9.845673       0.000000       0.216859       0.153000   -9999.000000       0.069700   -9999.000000
53941     53941     shaanxi        109.5833       35.1833           99       158     2012      11        01        306              0.129958       9.275757       0.039975       0.212587       0.116000   -9999.000000       0.079700       0.505000
53941     53941     shaanxi        109.5833       35.1833           99       158     2012      11        02        307              0.129625      10.008240       0.405172       0.211166   -9999.000000   -9999.000000   -9999.000000       0.452000
53941     53941     shaanxi        109.5833       35.1833           99       158     2012      11        03        308              0.128583      11.393860       1.581260       0.210643   -9999.000000       0.159100       0.069800   -9999.000000
53941     53941     shaanxi        109.5833       35.1833           99       158     2012      11        04        309              0.127792       5.595734       0.097345       0.210280       0.118000   -9999.000000       0.069400       0.366000
53941     53941     shaanxi        109.5833       35.1833           99       158     2012      11        05        310              0.127417       4.712616       0.000000       0.205276       0.114000   -9999.000000       0.062000   -9999.000000
53941     53941     shaanxi        109.5833       35.1833           99       158     2012      11        06        311              0.127458       5.153595       0.000000       0.203744       0.127000   -9999.000000       0.086100       0.543000
53941     53941     shaanxi        109.5833       35.1833           99       158     2012      11        07        312              0.127458       7.282867       0.582586       0.205959   -9999.000000   -9999.000000       0.076000   -9999.000000
53941     53941     shaanxi        109.5833       35.1833           99       158     2012      11        08        313              0.127292       6.078705       2.601120       0.206691       0.132000       0.077700   -9999.000000   -9999.000000
53941     53941     shaanxi        109.5833       35.1833           99       158     2012      11        09        314              0.127083       7.637054       0.546216       0.206537       0.139500   -9999.000000       0.068400       0.545000
53941     53941     shaanxi        109.5833       35.1833           99       158     2012      11        10        315              0.126875       5.759827       0.357250       0.212533       0.128000   -9999.000000       0.079400   -9999.000000
53941     53941     shaanxi        109.5833       35.1833           99       158     2012      11        11        316              0.126333       3.424835       0.000000       0.211694       0.118000       0.109600       0.072700       0.345000
53941     53941     shaanxi        109.5833       35.1833           99       158     2012      11        12        317              0.126375       3.485382       0.000000       0.204945       0.120000   -9999.000000       0.071900   -9999.000000
53941     53941     shaanxi        109.5833       35.1833           99       158     2012      11        13        318              0.000000       5.479370       0.460395       0.209569   -9999.000000       0.185600   -9999.000000       0.326000
53941     53941     shaanxi        109.5833       35.1833           99       158     2012      11        14        319              0.126458       5.847626       0.000000       0.208334       0.127000   -9999.000000       0.069300       0.506000
53941     53941     shaanxi        109.5833       35.1833           99       158     2012      11        15        320              0.127250       6.866028       2.024164       0.208695   -9999.000000   -9999.000000       0.047400   -9999.000000
53941     53941     shaanxi        109.5833       35.1833           99       158     2012      11        16        321              0.129750       3.724701       0.593267       0.230299       0.140000       0.053500       0.063600       0.456000
53941     53941     shaanxi        109.5833       35.1833           99       158     2012      11        17        322              0.000000       4.880920       0.000000       0.226096       0.126000   -9999.000000       0.063400   -9999.000000
53941     53941     shaanxi        109.5833       35.1833           99       158     2012      11        18        323              0.130625       5.926666       0.000000       0.224020   -9999.000000   -9999.000000       0.069600       0.458000
53941     53941     shaanxi        109.5833       35.1833           99       158     2012      11        19        324              0.130833       6.127533       0.075037       0.219809       0.139000   -9999.000000   -9999.000000       0.507000
53941     53941     shaanxi        109.5833       35.1833           99       158     2012      11        20        325              0.131000       6.009735       0.000000       0.218651       0.125000       0.156700       0.061700       0.438000
53941     53941     shaanxi        109.5833       35.1833           99       158     2012      11        21        326              0.131167       5.406219       0.000000       0.219767       0.113500   -9999.000000       0.066000       0.413000
53941     53941     shaanxi        109.5833       35.1833           99       158     2012      11        22        327              0.130292       6.637512       0.000000       0.219444       0.119000   -9999.000000       0.052200   -9999.000000
53941     53941     shaanxi        109.5833       35.1833           99       158     2012      11        23        328              0.129375       4.111328       0.000000       0.215365       0.112000       0.112300       0.061700       0.211000
53941     53941     shaanxi        109.5833       35.1833           99       158     2012      11        24        329              0.129000       3.257019       0.521959       0.204297       0.118000       0.001600   -9999.000000       0.427000
53941     53941     shaanxi        109.5833       35.1833           99       158     2012      11        25        330              0.128750       3.441437       0.272853       0.211279   -9999.000000   -9999.000000   -9999.000000       0.421000
53941     53941     shaanxi        109.5833       35.1833           99       158     2012      11        26        331              0.128333       2.582489       0.177446       0.212386       0.111000       0.104200   -9999.000000       0.172000
53941     53941     shaanxi        109.5833       35.1833           99       158     2012      11        27        332              0.128292       1.834900       0.045097       0.199709       0.128000   -9999.000000       0.053400   -9999.000000
53941     53941     shaanxi        109.5833       35.1833           99       158     2012      11        28        333              0.127792       3.285797       0.000000       0.206746   -9999.000000   -9999.000000       0.047600       0.158000
53941     53941     shaanxi        109.5833       35.1833           99       158     2012      11        29        334              0.127375      -0.318512       0.000000       0.189255   -9999.000000       0.065100       0.050600   -9999.000000
53941     53941     shaanxi        109.5833       35.1833           99       158     2012      11        30        335              0.127625      -0.790588       0.088084       0.184401   -9999.000000   -9999.000000   -9999.000000       0.334000
53941     53941     shaanxi        109.5833       35.1833           99       158     2012      12        01        336              0.128000       0.751129       0.669398       0.194546   -9999.000000   -9999.000000       0.046600       0.255000
53941     53941     shaanxi        109.5833       35.1833           99       158     2012      12        02        337              0.128792      -0.332367       0.210326       0.195175       0.121000   -9999.000000       0.040900   -9999.000000
53941     53941     shaanxi        109.5833       35.1833           99       158     2012      12        03        338              0.129833       1.490723       0.000000       0.206903       0.122000   -9999.000000       0.048900       0.224000
53941     53941     shaanxi        109.5833       35.1833           99       158     2012      12        04        339              0.130083       1.248535       1.467107       0.198314   -9999.000000   -9999.000000       0.049000   -9999.000000
53941     53941     shaanxi        109.5833       35.1833           99       158     2012      12        05        340              0.130292       2.387207       0.209822       0.203891   -9999.000000   -9999.000000       0.052300       0.152000
53941     53941     shaanxi        109.5833       35.1833           99       158     2012      12        06        341              0.130708       1.436676       0.000000       0.197201       0.112000   -9999.000000   -9999.000000   -9999.000000
53941     53941     shaanxi        109.5833       35.1833           99       158     2012      12        07        342              0.130542       3.339233       0.000000       0.204673       0.107000       0.084600       0.037400   -9999.000000
53941     53941     shaanxi        109.5833       35.1833           99       158     2012      12        08        343              0.130000       2.332855       0.000000       0.196654       0.116000       0.118200       0.051700       0.127000
53941     53941     shaanxi        109.5833       35.1833           99       158     2012      12        09        344              0.129208      -0.566376       0.107545       0.183523       0.112000       0.097300       0.041700   -9999.000000
53941     53941     shaanxi        109.5833       35.1833           99       158     2012      12        10        345              0.128500      -0.712219       0.000000       0.181961   -9999.000000   -9999.000000       0.054700       0.194000
53941     53941     shaanxi        109.5833       35.1833           99       158     2012      12        11        346              0.127667       0.299774       0.000000       0.186276   -9999.000000   -9999.000000   -9999.000000   -9999.000000
53941     53941     shaanxi        109.5833       35.1833           99       158     2012      12        12        347              0.128708      -0.489868       0.000000       0.184661       0.094000       0.017700       0.055200       0.033000
53941     53941     shaanxi        109.5833       35.1833           99       158     2012      12        13        348              0.130000       0.090118       0.184752       0.188645       0.116000   -9999.000000       0.030800       0.127000
53941     53941     shaanxi        109.5833       35.1833           99       158     2012      12        14        349              0.130292      -1.120087       0.220435       0.184139   -9999.000000       0.031700       0.052000   -9999.000000
53941     53941     shaanxi        109.5833       35.1833           99       158     2012      12        15        350              0.000000      -0.678162       0.290138       0.188798   -9999.000000   -9999.000000       0.051100       0.237000
53941     53941     shaanxi        109.5833       35.1833           99       158     2012      12        16        351              0.130917      -0.884735       0.278036       0.186704   -9999.000000   -9999.000000       0.059800   -9999.000000
53941     53941     shaanxi        109.5833       35.1833           99       158     2012      12        17        352              0.130833       0.018829       0.000000       0.195228   -9999.000000       0.024300   -9999.000000       0.277000
53941     53941     shaanxi        109.5833       35.1833           99       158     2012      12        18        353              0.130167      -0.981049       0.150159       0.188392       0.092000   -9999.000000       0.047500       0.133000
53941     53941     shaanxi        109.5833       35.1833           99       158     2012      12        19        354              0.129750      -0.644623       0.000000       0.186170       0.109000       0.048800       0.041500       0.106000
53941     53941     shaanxi        109.5833       35.1833           99       158     2012      12        20        355              0.000000      -0.648590       0.098738       0.187024   -9999.000000   -9999.000000       0.051600       0.014000
53941     53941     shaanxi        109.5833       35.1833           99       158     2012      12        21        356              0.130125      -2.415192       0.087603       0.175495   -9999.000000       0.089300       0.054700   -9999.000000
53941     53941     shaanxi        109.5833       35.1833           99       158     2012      12        22        357              0.126667      -2.987152       0.000000       0.172176   -9999.000000       0.067400       0.050800       0.021000
53941     53941     shaanxi        109.5833       35.1833           99       158     2012      12        23        358              0.119083      -5.349854       0.000000       0.160044   -9999.000000   -9999.000000   -9999.000000   -9999.000000
53941     53941     shaanxi        109.5833       35.1833           99       158     2012      12        24        359              0.117389      -6.514832       0.228990       0.152151       0.096000   -9999.000000       0.032200       0.006000
53941     53941     shaanxi        109.5833       35.1833           99       158     2012      12        25        360              0.117875      -4.265228       0.277605       0.164352       0.093000   -9999.000000       0.048400   -9999.000000
53941     53941     shaanxi        109.5833       35.1833           99       158     2012      12        26        361              0.000000      -4.253387       0.000000       0.165185   -9999.000000       0.121200       0.044200   -9999.000000
53941     53941     shaanxi        109.5833       35.1833           99       158     2012      12        27        362              0.117727      -4.216400       0.000000       0.163287   -9999.000000       0.139700       0.049400       0.003000
53941     53941     shaanxi        109.5833       35.1833           99       158     2012      12        28        363              0.000000      -3.246185       0.000000       0.170685   -9999.000000   -9999.000000   -9999.000000   -9999.000000
53941     53941     shaanxi        109.5833       35.1833           99       158     2012      12        29        364              0.000000      -3.603455       0.000000       0.167002   -9999.000000   -9999.000000       0.048200       0.005000
53941     53941     shaanxi        109.5833       35.1833           99       158     2012      12        30        365              0.000000      -7.042908       0.000000       0.152066       0.090000   -9999.000000       0.028500       0.001000
53941     53941     shaanxi        109.5833       35.1833           99       158     2012      12        31        366              0.117267      -5.193390       0.000000       0.160165   -9999.000000   -9999.000000       0.042700   -9999.000000
