# Supplementary material for: Research on Fusing Multisatellite Soil Moisture Data Based on Bayesian Model Averaging
Source: Hindawi journal article supplement (doi:10.1155/2018/9310838), 2018-06-25
Supplement: f1 [file 9310838.f1.zip › 2012_sm00-10cm_daily_ZDB_ZHY_53942_366days_allin.txt]

53942     53942     shaanxi        109.5000       35.8167           97       158     2012      01        01        001              0.000000   -9999.000000       0.000000   -9999.000000       0.091000   -9999.000000       0.031200   -9999.000000
53942     53942     shaanxi        109.5000       35.8167           97       158     2012      01        02        002              0.174917      -1.701019       0.000000       0.193070       0.095000       0.018800   -9999.000000       0.012000
53942     53942     shaanxi        109.5000       35.8167           97       158     2012      01        03        003              0.000000      -2.728577       0.000000       0.183822   -9999.000000   -9999.000000       0.030400   -9999.000000
53942     53942     shaanxi        109.5000       35.8167           97       158     2012      01        04        004              0.162292      -5.927643       0.000000       0.160746   -9999.000000   -9999.000000       0.025500   -9999.000000
53942     53942     shaanxi        109.5000       35.8167           97       158     2012      01        05        005              0.162250      -5.898743       0.000000       0.160420   -9999.000000   -9999.000000       0.032700       0.047000
53942     53942     shaanxi        109.5000       35.8167           97       158     2012      01        06        006              0.167833      -4.041290       0.000000       0.170934       0.092000   -9999.000000       0.031100       0.133000
53942     53942     shaanxi        109.5000       35.8167           97       158     2012      01        07        007              0.171667      -1.684174       0.000000       0.192574       0.098000       0.095400       0.034100       0.006000
53942     53942     shaanxi        109.5000       35.8167           97       158     2012      01        08        008              0.000000      -2.174774       0.000000       0.189088       0.093000       0.026500   -9999.000000   -9999.000000
53942     53942     shaanxi        109.5000       35.8167           97       158     2012      01        09        009              0.169833      -1.479797       0.000000       0.196715   -9999.000000       0.131300   -9999.000000       0.010000
53942     53942     shaanxi        109.5000       35.8167           97       158     2012      01        10        010              0.167792      -1.155731       0.000000       0.200632   -9999.000000       0.137300       0.027500       0.052000
53942     53942     shaanxi        109.5000       35.8167           97       158     2012      01        11        011              0.166833      -2.222351       0.000000       0.190455       0.091000   -9999.000000       0.028700       0.098000
53942     53942     shaanxi        109.5000       35.8167           97       158     2012      01        12        012              0.166792      -2.203888       0.000000       0.190572       0.101000   -9999.000000       0.029400       0.002000
53942     53942     shaanxi        109.5000       35.8167           97       158     2012      01        13        013              0.167792      -1.446320       0.000000       0.196575       0.096000   -9999.000000       0.029400   -9999.000000
53942     53942     shaanxi        109.5000       35.8167           97       158     2012      01        14        014              0.167667      -1.263672       0.000000       0.197572   -9999.000000   -9999.000000   -9999.000000       0.032000
53942     53942     shaanxi        109.5000       35.8167           97       158     2012      01        15        015              0.166833      -2.350677       0.000000       0.189787   -9999.000000   -9999.000000       0.024600       0.073000
53942     53942     shaanxi        109.5000       35.8167           97       158     2012      01        16        016              0.170125      -1.145142       0.000000       0.198177       0.087000   -9999.000000       0.025900       0.122000
53942     53942     shaanxi        109.5000       35.8167           97       158     2012      01        17        017              0.000000      -0.745636       0.000000       0.202013       0.088000   -9999.000000       0.024100       0.006000
53942     53942     shaanxi        109.5000       35.8167           97       158     2012      01        18        018              0.171583      -0.454651       0.000000       0.205779       0.096000       0.099300       0.027200   -9999.000000
53942     53942     shaanxi        109.5000       35.8167           97       158     2012      01        19        019              0.175708      -0.142883       0.000000       0.207820   -9999.000000   -9999.000000   -9999.000000       0.031000
53942     53942     shaanxi        109.5000       35.8167           97       158     2012      01        20        020              0.175167      -0.424957       0.498933       0.206727   -9999.000000   -9999.000000       0.023100   -9999.000000
53942     53942     shaanxi        109.5000       35.8167           97       158     2012      01        21        021              0.170458      -2.275177       0.132307       0.186132   -9999.000000   -9999.000000       0.019000       0.055000
53942     53942     shaanxi        109.5000       35.8167           97       158     2012      01        22        022              0.165167      -5.948669       0.585806       0.157686   -9999.000000       0.080000       0.021900   -9999.000000
53942     53942     shaanxi        109.5000       35.8167           97       158     2012      01        23        023              0.161292      -7.017731       1.036613       0.154227   -9999.000000   -9999.000000       0.022300   -9999.000000
53942     53942     shaanxi        109.5000       35.8167           97       158     2012      01        24        024              0.159167      -7.288300       0.000000       0.149349   -9999.000000   -9999.000000   -9999.000000       0.017000
53942     53942     shaanxi        109.5000       35.8167           97       158     2012      01        25        025              0.159500      -7.319519       0.000000       0.150626   -9999.000000   -9999.000000   -9999.000000   -9999.000000
53942     53942     shaanxi        109.5000       35.8167           97       158     2012      01        26        026              0.163167      -4.234894       0.109318       0.172742   -9999.000000   -9999.000000       0.024400       0.016000
53942     53942     shaanxi        109.5000       35.8167           97       158     2012      01        27        027              0.164583      -1.676605       0.000000       0.196028       0.099000   -9999.000000       0.025600   -9999.000000
53942     53942     shaanxi        109.5000       35.8167           97       158     2012      01        28        028              0.167625      -0.424866       0.000000       0.206402       0.111000   -9999.000000       0.025900       0.125000
53942     53942     shaanxi        109.5000       35.8167           97       158     2012      01        29        029              0.171375      -0.038666       0.000000       0.210104       0.106000   -9999.000000       0.027800       0.136000
53942     53942     shaanxi        109.5000       35.8167           97       158     2012      01        30        030              0.172375       0.327728       0.000000       0.214811   -9999.000000   -9999.000000   -9999.000000       0.246000
53942     53942     shaanxi        109.5000       35.8167           97       158     2012      01        31        031              0.176917       0.796844       0.000000       0.218632   -9999.000000   -9999.000000   -9999.000000       0.201000
53942     53942     shaanxi        109.5000       35.8167           97       158     2012      02        01        032              0.174125       2.375549       0.000000       0.232487       0.089000   -9999.000000       0.020700   -9999.000000
53942     53942     shaanxi        109.5000       35.8167           97       158     2012      02        02        033              0.168917      -1.474854       0.000000       0.201159       0.095000   -9999.000000       0.025500       0.061000
53942     53942     shaanxi        109.5000       35.8167           97       158     2012      02        03        034              0.171708      -1.886841       0.000000       0.194002       0.096000   -9999.000000       0.027500       0.182000
53942     53942     shaanxi        109.5000       35.8167           97       158     2012      02        04        035              0.174208       0.279694       0.000000       0.210671   -9999.000000   -9999.000000       0.030100       0.268000
53942     53942     shaanxi        109.5000       35.8167           97       158     2012      02        05        036              0.178000      -0.064667       0.000000       0.208366   -9999.000000       0.072900   -9999.000000       0.098000
53942     53942     shaanxi        109.5000       35.8167           97       158     2012      02        06        037              0.173250       1.355621       0.000000       0.219574   -9999.000000   -9999.000000       0.026200   -9999.000000
53942     53942     shaanxi        109.5000       35.8167           97       158     2012      02        07        038              0.163583      -3.452728       0.000000       0.188685       0.081000   -9999.000000       0.023200       0.003000
53942     53942     shaanxi        109.5000       35.8167           97       158     2012      02        08        039              0.159708      -4.976044       0.000000       0.168197   -9999.000000   -9999.000000       0.027800       0.016000
53942     53942     shaanxi        109.5000       35.8167           97       158     2012      02        09        040              0.160833      -6.296204       0.000000       0.152240   -9999.000000       0.165800       0.028000       0.059000
53942     53942     shaanxi        109.5000       35.8167           97       158     2012      02        10        041              0.163833      -4.979279       0.000000       0.160163   -9999.000000   -9999.000000       0.029600       0.003000
53942     53942     shaanxi        109.5000       35.8167           97       158     2012      02        11        042              0.167667      -2.443695       0.000000       0.188769       0.083000   -9999.000000   -9999.000000   -9999.000000
53942     53942     shaanxi        109.5000       35.8167           97       158     2012      02        12        043              0.172958       0.122803       0.359374       0.206187       0.091000   -9999.000000   -9999.000000       0.179000
53942     53942     shaanxi        109.5000       35.8167           97       158     2012      02        13        044              0.169958      -0.701904       0.000000       0.201667       0.098000   -9999.000000   -9999.000000       0.213000
53942     53942     shaanxi        109.5000       35.8167           97       158     2012      02        14        045              0.174500      -0.493164       0.000000       0.204310       0.091000   -9999.000000   -9999.000000       0.277000
53942     53942     shaanxi        109.5000       35.8167           97       158     2012      02        15        046              0.178833       0.874939       0.000000       0.215760   -9999.000000   -9999.000000       0.032200       0.006000
53942     53942     shaanxi        109.5000       35.8167           97       158     2012      02        16        047              0.177292       0.679810       0.000000       0.215970   -9999.000000   -9999.000000   -9999.000000   -9999.000000
53942     53942     shaanxi        109.5000       35.8167           97       158     2012      02        17        048              0.171875      -0.409760       0.000000       0.205298       0.082000   -9999.000000   -9999.000000       0.005000
53942     53942     shaanxi        109.5000       35.8167           97       158     2012      02        18        049              0.171708      -1.994751       0.000000       0.192019       0.097000   -9999.000000       0.020400   -9999.000000
53942     53942     shaanxi        109.5000       35.8167           97       158     2012      02        19        050              0.176375      -0.978790       0.000000       0.198001       0.091000   -9999.000000       0.030400       0.235000
53942     53942     shaanxi        109.5000       35.8167           97       158     2012      02        20        051              0.184458       1.187103       0.000000       0.212460   -9999.000000       0.050600       0.028900   -9999.000000
53942     53942     shaanxi        109.5000       35.8167           97       158     2012      02        21        052              0.196125       2.094177       0.000000       0.223657   -9999.000000   -9999.000000   -9999.000000   -9999.000000
53942     53942     shaanxi        109.5000       35.8167           97       158     2012      02        22        053              0.209333       3.659943       0.000000       0.232534       0.079000   -9999.000000   -9999.000000       0.275000
53942     53942     shaanxi        109.5000       35.8167           97       158     2012      02        23        054              0.216087       4.340210       0.000000       0.238612       0.073000   -9999.000000       0.028600   -9999.000000
53942     53942     shaanxi        109.5000       35.8167           97       158     2012      02        24        055              0.217625       1.791077       0.434783       0.229231       0.094000   -9999.000000       0.025500       0.362000
53942     53942     shaanxi        109.5000       35.8167           97       158     2012      02        25        056              0.214250       1.838837       1.221306       0.229284   -9999.000000       0.045700       0.029000   -9999.000000
53942     53942     shaanxi        109.5000       35.8167           97       158     2012      02        26        057              0.211083       0.793365       0.469260       0.217562   -9999.000000   -9999.000000       0.031800       0.108000
53942     53942     shaanxi        109.5000       35.8167           97       158     2012      02        27        058              0.204333       0.855194       0.000000       0.218253       0.081000   -9999.000000   -9999.000000       0.290000
53942     53942     shaanxi        109.5000       35.8167           97       158     2012      02        28        059              0.202750       1.276855       0.000000       0.218412       0.078000       0.048100   -9999.000000       0.443000
53942     53942     shaanxi        109.5000       35.8167           97       158     2012      02        29        060              0.000000   -9999.000000       0.000000   -9999.000000       0.088000   -9999.000000   -9999.000000   -9999.000000
53942     53942     shaanxi        109.5000       35.8167           97       158     2012      03        01        061              0.224083       2.174042       0.291449       0.227547       0.099000   -9999.000000       0.028100   -9999.000000
53942     53942     shaanxi        109.5000       35.8167           97       158     2012      03        02        062              0.232583       2.456848       0.000000       0.236925   -9999.000000   -9999.000000       0.025900       0.350000
53942     53942     shaanxi        109.5000       35.8167           97       158     2012      03        03        063              0.235708       1.899750       2.443856       0.235294   -9999.000000   -9999.000000       0.029300       0.391000
53942     53942     shaanxi        109.5000       35.8167           97       158     2012      03        04        064              0.240625       1.540405       0.000000       0.229309       0.093000       0.076000   -9999.000000       0.512000
53942     53942     shaanxi        109.5000       35.8167           97       158     2012      03        05        065              0.263000       2.044678       0.000000       0.233134       0.101000   -9999.000000       0.029500       0.312000
53942     53942     shaanxi        109.5000       35.8167           97       158     2012      03        06        066              0.267583       3.530151       0.000000       0.235660       0.098000   -9999.000000       0.021900   -9999.000000
53942     53942     shaanxi        109.5000       35.8167           97       158     2012      03        07        067              0.000000       2.162811       0.000000       0.223778       0.092000       0.010500       0.032100       0.414000
53942     53942     shaanxi        109.5000       35.8167           97       158     2012      03        08        068              0.276708       4.247772       0.000000       0.237667   -9999.000000   -9999.000000       0.031300       0.423000
53942     53942     shaanxi        109.5000       35.8167           97       158     2012      03        09        069              0.282500       3.865540       0.000000       0.238538       0.092000       0.070100       0.035300       0.518000
53942     53942     shaanxi        109.5000       35.8167           97       158     2012      03        10        070              0.289833       4.522675       0.000000       0.238949       0.105000   -9999.000000   -9999.000000       0.310000
53942     53942     shaanxi        109.5000       35.8167           97       158     2012      03        11        071              0.294292       6.573578       0.000000       0.240977       0.089000   -9999.000000       0.028900   -9999.000000
53942     53942     shaanxi        109.5000       35.8167           97       158     2012      03        12        072              0.294208       6.381897       0.000000       0.237954   -9999.000000   -9999.000000       0.027500       0.315000
53942     53942     shaanxi        109.5000       35.8167           97       158     2012      03        13        073              0.294083       6.836609       0.000000       0.235649   -9999.000000   -9999.000000       0.032100       0.475000
53942     53942     shaanxi        109.5000       35.8167           97       158     2012      03        14        074              0.295292       9.367065       0.000000       0.235668       0.081000       0.028100   -9999.000000       0.647000
53942     53942     shaanxi        109.5000       35.8167           97       158     2012      03        15        075              0.305417       9.818451       0.470151       0.233378       0.090000   -9999.000000       0.041900       0.653000
53942     53942     shaanxi        109.5000       35.8167           97       158     2012      03        16        076              0.306167       4.545410       0.000000       0.243404       0.087000       0.269100   -9999.000000   -9999.000000
53942     53942     shaanxi        109.5000       35.8167           97       158     2012      03        17        077              0.303208       9.838776       0.000000       0.238747       0.090000   -9999.000000       0.028400       0.524000
53942     53942     shaanxi        109.5000       35.8167           97       158     2012      03        18        078              0.300125      12.237244       0.101861       0.232097       0.087000   -9999.000000       0.036100   -9999.000000
53942     53942     shaanxi        109.5000       35.8167           97       158     2012      03        19        079              0.297000      12.612183       0.000000       0.224413       0.084500   -9999.000000       0.035400       0.447000
53942     53942     shaanxi        109.5000       35.8167           97       158     2012      03        20        080              0.293458       8.653625       0.000000       0.225178       0.083000   -9999.000000       0.039000   -9999.000000
53942     53942     shaanxi        109.5000       35.8167           97       158     2012      03        21        081              0.296375       8.661560       0.256577       0.226734       0.123000   -9999.000000   -9999.000000   -9999.000000
53942     53942     shaanxi        109.5000       35.8167           97       158     2012      03        22        082              0.308500       4.218872       0.376041       0.233837       0.113000       0.020800       0.037400       0.728000
53942     53942     shaanxi        109.5000       35.8167           97       158     2012      03        23        083              0.300708       4.761871       0.261422       0.239953   -9999.000000   -9999.000000       0.028100   -9999.000000
53942     53942     shaanxi        109.5000       35.8167           97       158     2012      03        24        084              0.291458       6.579468       0.204714       0.229869   -9999.000000       0.104100       0.033100       0.501000
53942     53942     shaanxi        109.5000       35.8167           97       158     2012      03        25        085              0.000000       9.976013       0.000000       0.227441       0.086000       0.034000       0.035800   -9999.000000
53942     53942     shaanxi        109.5000       35.8167           97       158     2012      03        26        086              0.281833      11.380951       0.000000       0.218336       0.092000   -9999.000000       0.041700       0.515000
53942     53942     shaanxi        109.5000       35.8167           97       158     2012      03        27        087              0.278250      11.757874       0.000000       0.212346       0.091000   -9999.000000   -9999.000000       0.503000
53942     53942     shaanxi        109.5000       35.8167           97       158     2012      03        28        088              0.283542      14.221710       1.551933       0.204584       0.105000   -9999.000000       0.047900       0.595000
53942     53942     shaanxi        109.5000       35.8167           97       158     2012      03        29        089              0.293917      10.797455       0.000000       0.221798       0.096000   -9999.000000       0.044300       0.544000
53942     53942     shaanxi        109.5000       35.8167           97       158     2012      03        30        090              0.285125      13.902802       0.266263       0.220906       0.089000   -9999.000000       0.040200   -9999.000000
53942     53942     shaanxi        109.5000       35.8167           97       158     2012      03        31        091              0.278292       9.084625       0.000000       0.212837       0.088500   -9999.000000       0.044200       0.527000
53942     53942     shaanxi        109.5000       35.8167           97       158     2012      04        01        092              0.273042      13.528381       0.000000       0.204526       0.088000       0.033400       0.041800       0.496000
53942     53942     shaanxi        109.5000       35.8167           97       158     2012      04        02        093              0.267583      14.677704       0.000000       0.199264   -9999.000000   -9999.000000   -9999.000000       0.551000
53942     53942     shaanxi        109.5000       35.8167           97       158     2012      04        03        094              0.264000      10.304840       1.351706       0.198552       0.089000   -9999.000000       0.033900       0.362000
53942     53942     shaanxi        109.5000       35.8167           97       158     2012      04        04        095              0.260375      13.417358       0.000000       0.193213       0.084500       0.016600       0.039500   -9999.000000
53942     53942     shaanxi        109.5000       35.8167           97       158     2012      04        05        096              0.255208      16.329865       0.000000       0.186984       0.082500   -9999.000000       0.034300       0.487000
53942     53942     shaanxi        109.5000       35.8167           97       158     2012      04        06        097              0.250583      15.939270       0.000000       0.183156       0.087000   -9999.000000       0.039400       0.449000
53942     53942     shaanxi        109.5000       35.8167           97       158     2012      04        07        098              0.247042      15.590698       0.000000       0.181146       0.091000   -9999.000000   -9999.000000       0.583000
53942     53942     shaanxi        109.5000       35.8167           97       158     2012      04        08        099              0.242875      17.449615       0.000000       0.179292       0.084000   -9999.000000       0.040900       0.352000
53942     53942     shaanxi        109.5000       35.8167           97       158     2012      04        09        100              0.238792      19.093231       0.657774       0.177563       0.092500       0.085100       0.045400   -9999.000000
53942     53942     shaanxi        109.5000       35.8167           97       158     2012      04        10        101              0.242792      16.374756       0.000000       0.185935       0.091000   -9999.000000       0.044900       0.499000
53942     53942     shaanxi        109.5000       35.8167           97       158     2012      04        11        102              0.241875      17.866943       0.651501       0.188682       0.103000   -9999.000000       0.038800       0.605000
53942     53942     shaanxi        109.5000       35.8167           97       158     2012      04        12        103              0.253667      14.841064       1.337910       0.187528       0.108000   -9999.000000       0.043200       0.849000
53942     53942     shaanxi        109.5000       35.8167           97       158     2012      04        13        104              0.255292      11.540924       0.000000       0.209255       0.094000   -9999.000000   -9999.000000       0.371000
53942     53942     shaanxi        109.5000       35.8167           97       158     2012      04        14        105              0.253375      15.925781       0.368677       0.195719       0.090000   -9999.000000       0.040100   -9999.000000
53942     53942     shaanxi        109.5000       35.8167           97       158     2012      04        15        106              0.252292      15.591309       0.000000       0.189340       0.085000   -9999.000000       0.037900       0.415000
53942     53942     shaanxi        109.5000       35.8167           97       158     2012      04        16        107              0.251696      19.379303       0.000000       0.180987       0.087500   -9999.000000       0.039300   -9999.000000
53942     53942     shaanxi        109.5000       35.8167           97       158     2012      04        17        108              0.250042      20.063965       0.226330       0.175826       0.083000   -9999.000000       0.047400       0.381000
53942     53942     shaanxi        109.5000       35.8167           97       158     2012      04        18        109              0.251917      15.969543       0.000000       0.177636       0.089000   -9999.000000   -9999.000000   -9999.000000
53942     53942     shaanxi        109.5000       35.8167           97       158     2012      04        19        110              0.250750      20.172638       0.333728       0.176125       0.088000       0.043100   -9999.000000   -9999.000000
53942     53942     shaanxi        109.5000       35.8167           97       158     2012      04        20        111              0.248917      18.976685       0.253760       0.175150       0.094000   -9999.000000       0.039700       0.410000
53942     53942     shaanxi        109.5000       35.8167           97       158     2012      04        21        112              0.250083      18.360809       0.000000       0.176318       0.095500   -9999.000000       0.045700   -9999.000000
53942     53942     shaanxi        109.5000       35.8167           97       158     2012      04        22        113              0.250333      21.732300       0.000000       0.173200       0.096000       0.020200   -9999.000000       0.390000
53942     53942     shaanxi        109.5000       35.8167           97       158     2012      04        23        114              0.249917      23.704834       3.141016       0.171191   -9999.000000   -9999.000000       0.057700   -9999.000000
53942     53942     shaanxi        109.5000       35.8167           97       158     2012      04        24        115              0.252917      22.673004       0.112956       0.193756       0.110000   -9999.000000   -9999.000000       0.921000
53942     53942     shaanxi        109.5000       35.8167           97       158     2012      04        25        116              0.000000      17.071228       0.652083       0.205145       0.103000   -9999.000000       0.062600       0.412000
53942     53942     shaanxi        109.5000       35.8167           97       158     2012      04        26        117              0.251417      17.496399       0.000000       0.185138       0.092000   -9999.000000       0.053700       0.566000
53942     53942     shaanxi        109.5000       35.8167           97       158     2012      04        27        118              0.250750      20.890686       0.000000       0.175084       0.094000       0.073900       0.052600       0.367000
53942     53942     shaanxi        109.5000       35.8167           97       158     2012      04        28        119              0.249708      23.082184       3.134179       0.170478       0.092000   -9999.000000       0.051400   -9999.000000
53942     53942     shaanxi        109.5000       35.8167           97       158     2012      04        29        120              0.247958      23.708344       0.730925       0.195120       0.091000   -9999.000000       0.052500       0.444000
53942     53942     shaanxi        109.5000       35.8167           97       158     2012      04        30        121              0.243417      23.080627       0.000000       0.194014       0.127000   -9999.000000   -9999.000000       0.581000
53942     53942     shaanxi        109.5000       35.8167           97       158     2012      05        01        122              0.257750      18.767120       6.610968       0.187410       0.156500   -9999.000000       0.076900       1.000000
53942     53942     shaanxi        109.5000       35.8167           97       158     2012      05        02        123              0.269792      15.849640       0.121375       0.260230       0.152000       0.194200       0.073100       0.538000
53942     53942     shaanxi        109.5000       35.8167           97       158     2012      05        03        124              0.264750      20.211914       0.134721       0.239196       0.141000   -9999.000000       0.063400   -9999.000000
53942     53942     shaanxi        109.5000       35.8167           97       158     2012      05        04        125              0.262667      20.021698       0.783193       0.223309       0.116000   -9999.000000       0.062100       0.667000
53942     53942     shaanxi        109.5000       35.8167           97       158     2012      05        05        126              0.261417      23.135193       0.000000       0.202305       0.116000   -9999.000000       0.061100       0.444000
53942     53942     shaanxi        109.5000       35.8167           97       158     2012      05        06        127              0.258958      24.292358       7.784080       0.185370       0.101000   -9999.000000   -9999.000000       0.567000
53942     53942     shaanxi        109.5000       35.8167           97       158     2012      05        07        128              0.283125      23.194916       2.203089       0.201544   -9999.000000       0.174200       0.080900       0.744000
53942     53942     shaanxi        109.5000       35.8167           97       158     2012      05        08        129              0.277083      21.175995       4.736943       0.265000       0.121000   -9999.000000       0.072400   -9999.000000
53942     53942     shaanxi        109.5000       35.8167           97       158     2012      05        09        130              0.267667      24.037537       6.489557       0.244734   -9999.000000   -9999.000000       0.082800       0.630000
53942     53942     shaanxi        109.5000       35.8167           97       158     2012      05        10        131              0.264217      21.155670       5.209408       0.290608       0.119000   -9999.000000       0.082200       0.534000
53942     53942     shaanxi        109.5000       35.8167           97       158     2012      05        11        132              0.266125      24.186096       1.061987       0.261572       0.213500   -9999.000000   -9999.000000       0.982000
53942     53942     shaanxi        109.5000       35.8167           97       158     2012      05        12        133              0.262958      17.873230       0.000000       0.286938       0.196000   -9999.000000       0.084400       0.499000
53942     53942     shaanxi        109.5000       35.8167           97       158     2012      05        13        134              0.259542      16.662109       0.053805       0.258622       0.186000   -9999.000000       0.080800   -9999.000000
53942     53942     shaanxi        109.5000       35.8167           97       158     2012      05        14        135              0.258083      16.996185       0.000000       0.245451   -9999.000000   -9999.000000       0.107200       0.401000
53942     53942     shaanxi        109.5000       35.8167           97       158     2012      05        15        136              0.255292      19.522125       0.000000       0.227732       0.161000       0.066900       0.096500   -9999.000000
53942     53942     shaanxi        109.5000       35.8167           97       158     2012      05        16        137              0.251292      20.813751       0.000000       0.209936       0.151500   -9999.000000       0.097800       0.337000
53942     53942     shaanxi        109.5000       35.8167           97       158     2012      05        17        138              0.241083      21.307648       0.000000       0.195764       0.157500   -9999.000000   -9999.000000   -9999.000000
53942     53942     shaanxi        109.5000       35.8167           97       158     2012      05        18        139              0.232208      23.473145       0.000000       0.186452       0.164000   -9999.000000       0.095500   -9999.000000
53942     53942     shaanxi        109.5000       35.8167           97       158     2012      05        19        140              0.229500      25.273346       0.000000       0.181165       0.149000   -9999.000000       0.103600       0.481000
53942     53942     shaanxi        109.5000       35.8167           97       158     2012      05        20        141              0.226542      26.603821       2.135903       0.177734   -9999.000000       0.125200       0.091400   -9999.000000
53942     53942     shaanxi        109.5000       35.8167           97       158     2012      05        21        142              0.223208      26.407104       5.856354       0.181228       0.261000   -9999.000000       0.139300       0.932000
53942     53942     shaanxi        109.5000       35.8167           97       158     2012      05        22        143              0.230417      16.931519       0.102145       0.262604       0.214500       0.124500   -9999.000000   -9999.000000
53942     53942     shaanxi        109.5000       35.8167           97       158     2012      05        23        144              0.229083      19.735535       0.110713       0.243159   -9999.000000   -9999.000000   -9999.000000       0.680000
53942     53942     shaanxi        109.5000       35.8167           97       158     2012      05        24        145              0.225458      19.540375       0.063366       0.224240       0.214000   -9999.000000       0.100500       0.443000
53942     53942     shaanxi        109.5000       35.8167           97       158     2012      05        25        146              0.000000      17.680695       0.000000       0.215082       0.201000       0.061900       0.113700       0.517000
53942     53942     shaanxi        109.5000       35.8167           97       158     2012      05        26        147              0.227042      21.334503       0.000000       0.200831       0.183000   -9999.000000       0.104600       0.427000
53942     53942     shaanxi        109.5000       35.8167           97       158     2012      05        27        148              0.225417      24.310455       0.000000       0.185842       0.189500   -9999.000000       0.101500   -9999.000000
53942     53942     shaanxi        109.5000       35.8167           97       158     2012      05        28        149              0.220625      26.032074       5.240395       0.177436   -9999.000000   -9999.000000   -9999.000000       0.487000
53942     53942     shaanxi        109.5000       35.8167           97       158     2012      05        29        150              0.223958      22.393219       0.445300       0.208442       0.217000   -9999.000000       0.106600       0.513000
53942     53942     shaanxi        109.5000       35.8167           97       158     2012      05        30        151              0.224500      23.289062       0.000000       0.225989   -9999.000000       0.121300       0.104200   -9999.000000
53942     53942     shaanxi        109.5000       35.8167           97       158     2012      05        31        152              0.220667      24.483643       0.000000       0.197388       0.190000   -9999.000000       0.101500   -9999.000000
53942     53942     shaanxi        109.5000       35.8167           97       158     2012      06        01        153              0.221458      22.279205       5.580841       0.187897       0.169000       0.243700       0.078100   -9999.000000
53942     53942     shaanxi        109.5000       35.8167           97       158     2012      06        02        154              0.220375      23.253265       0.185134       0.225258       0.173500   -9999.000000       0.102700       0.753000
53942     53942     shaanxi        109.5000       35.8167           97       158     2012      06        03        155              0.218750      23.788483       0.428605       0.222865       0.179000   -9999.000000   -9999.000000       0.494000
53942     53942     shaanxi        109.5000       35.8167           97       158     2012      06        04        156              0.216958      23.747223       0.217870       0.200478   -9999.000000   -9999.000000       0.115800       0.643000
53942     53942     shaanxi        109.5000       35.8167           97       158     2012      06        05        157              0.212750      25.015869       3.579665       0.187787       0.201000       0.188800       0.138200       0.621000
53942     53942     shaanxi        109.5000       35.8167           97       158     2012      06        06        158              0.212292      21.133301       0.147213       0.215733       0.184000   -9999.000000       0.119100   -9999.000000
53942     53942     shaanxi        109.5000       35.8167           97       158     2012      06        07        159              0.214333      19.993591       0.246605       0.222033       0.170500       0.087200       0.117100       0.532000
53942     53942     shaanxi        109.5000       35.8167           97       158     2012      06        08        160              0.211875      24.422516       0.000000       0.198080       0.183000   -9999.000000   -9999.000000       0.481000
53942     53942     shaanxi        109.5000       35.8167           97       158     2012      06        09        161              0.211625      24.745636       0.000000       0.182900       0.158000   -9999.000000       0.120000       0.600000
53942     53942     shaanxi        109.5000       35.8167           97       158     2012      06        10        162              0.210625      28.658081       0.000000       0.171805       0.162000   -9999.000000       0.108400       0.423000
53942     53942     shaanxi        109.5000       35.8167           97       158     2012      06        11        163              0.000000      25.978058       0.000000       0.167466       0.176000   -9999.000000       0.171000   -9999.000000
53942     53942     shaanxi        109.5000       35.8167           97       158     2012      06        12        164              0.210042      27.500610       0.997000       0.164183       0.162500       0.066300       0.159900       0.498000
53942     53942     shaanxi        109.5000       35.8167           97       158     2012      06        13        165              0.209458      28.595428       1.437366       0.170103       0.179000   -9999.000000       0.155000   -9999.000000
53942     53942     shaanxi        109.5000       35.8167           97       158     2012      06        14        166              0.206417      29.178406       0.419957       0.175503       0.186000   -9999.000000   -9999.000000       0.459000
53942     53942     shaanxi        109.5000       35.8167           97       158     2012      06        15        167              0.204667      26.187714       0.000000       0.170517       0.180000   -9999.000000       0.166300   -9999.000000
53942     53942     shaanxi        109.5000       35.8167           97       158     2012      06        16        168              0.203458      27.446808       0.000000       0.162925       0.169000   -9999.000000       0.165900   -9999.000000
53942     53942     shaanxi        109.5000       35.8167           97       158     2012      06        17        169              0.202000      28.531403       0.000000       0.160112       0.178000       0.043600       0.171800       0.535000
53942     53942     shaanxi        109.5000       35.8167           97       158     2012      06        18        170              0.199458      29.772278      13.114452       0.159121       0.186000   -9999.000000       0.133000   -9999.000000
53942     53942     shaanxi        109.5000       35.8167           97       158     2012      06        19        171              0.206333      27.796997       1.875646       0.223322       0.193000   -9999.000000       0.148100       0.636000
53942     53942     shaanxi        109.5000       35.8167           97       158     2012      06        20        172              0.215833      22.296021       0.000000       0.275484   -9999.000000       0.152000   -9999.000000   -9999.000000
53942     53942     shaanxi        109.5000       35.8167           97       158     2012      06        21        173              0.220833      25.986389       4.821116       0.233054       0.214000   -9999.000000       0.151300       0.536000
53942     53942     shaanxi        109.5000       35.8167           97       158     2012      06        22        174              0.231167      25.680145       1.525615       0.240888       0.181000   -9999.000000       0.151400       0.641000
53942     53942     shaanxi        109.5000       35.8167           97       158     2012      06        23        175              0.229417      27.145813       1.685131       0.227214       0.170500   -9999.000000       0.133600       0.677000
53942     53942     shaanxi        109.5000       35.8167           97       158     2012      06        24        176              0.225667      28.960754       0.425761       0.205782       0.218000   -9999.000000       0.142900       0.567000
53942     53942     shaanxi        109.5000       35.8167           97       158     2012      06        25        177              0.219458      27.523682       3.051416       0.208990   -9999.000000       0.161300   -9999.000000   -9999.000000
53942     53942     shaanxi        109.5000       35.8167           97       158     2012      06        26        178              0.217375      24.377716       0.222037       0.228598       0.210000   -9999.000000       0.180900       0.771000
53942     53942     shaanxi        109.5000       35.8167           97       158     2012      06        27        179              0.216375      24.005463       0.298616       0.213051       0.204000   -9999.000000       0.155600       0.636000
53942     53942     shaanxi        109.5000       35.8167           97       158     2012      06        28        180              0.214375      24.222931       7.339874       0.199994       0.209000   -9999.000000       0.202900       0.681000
53942     53942     shaanxi        109.5000       35.8167           97       158     2012      06        29        181              0.236304      24.013092       3.670700       0.217725       0.240000   -9999.000000       0.181900   -9999.000000
53942     53942     shaanxi        109.5000       35.8167           97       158     2012      06        30        182              0.241458      23.993713       2.819378       0.276348       0.210000       0.162200       0.168200   -9999.000000
53942     53942     shaanxi        109.5000       35.8167           97       158     2012      07        01        183              0.236792      27.079895       1.477528       0.236695       0.191000   -9999.000000   -9999.000000       0.705000
53942     53942     shaanxi        109.5000       35.8167           97       158     2012      07        02        184              0.230478      28.663086       0.000000       0.209784       0.198000   -9999.000000       0.157700       0.622000
53942     53942     shaanxi        109.5000       35.8167           97       158     2012      07        03        185              0.226125      28.110535       0.000000       0.196846       0.186000   -9999.000000       0.161100       0.647000
53942     53942     shaanxi        109.5000       35.8167           97       158     2012      07        04        186              0.219208      29.422699       0.488479       0.182154       0.236000   -9999.000000       0.157300       0.560000
53942     53942     shaanxi        109.5000       35.8167           97       158     2012      07        05        187              0.217208      25.999420       0.000000       0.182035       0.209000       0.248000       0.158200   -9999.000000
53942     53942     shaanxi        109.5000       35.8167           97       158     2012      07        06        188              0.212208      29.566864       0.720444       0.172885   -9999.000000   -9999.000000       0.156500       0.561000
53942     53942     shaanxi        109.5000       35.8167           97       158     2012      07        07        189              0.209500      28.921509       0.925711       0.169976   -9999.000000   -9999.000000   -9999.000000       0.623000
53942     53942     shaanxi        109.5000       35.8167           97       158     2012      07        08        190              0.292417      27.262085      41.114098       0.184098       0.259000       0.117400       0.170200       1.000000
53942     53942     shaanxi        109.5000       35.8167           97       158     2012      07        09        191              0.322125      23.240204       6.165746       0.338673       0.251000   -9999.000000       0.193600       0.965000
53942     53942     shaanxi        109.5000       35.8167           97       158     2012      07        10        192              0.308583      23.804108       0.560449       0.328262       0.212000       0.176800       0.180100   -9999.000000
53942     53942     shaanxi        109.5000       35.8167           97       158     2012      07        11        193              0.298167      28.107574       0.000000       0.298722       0.222000   -9999.000000       0.182000       0.844000
53942     53942     shaanxi        109.5000       35.8167           97       158     2012      07        12        194              0.286000      26.726074       0.052219       0.283043       0.213000   -9999.000000   -9999.000000   -9999.000000
53942     53942     shaanxi        109.5000       35.8167           97       158     2012      07        13        195              0.274792      28.116791       0.670394       0.262065       0.227500       0.028400       0.185100       0.766000
53942     53942     shaanxi        109.5000       35.8167           97       158     2012      07        14        196              0.267625      26.789185       3.827927       0.250169       0.247500   -9999.000000       0.173100   -9999.000000
53942     53942     shaanxi        109.5000       35.8167           97       158     2012      07        15        197              0.265750      25.761566       0.251411       0.266107       0.250000   -9999.000000       0.176800   -9999.000000
53942     53942     shaanxi        109.5000       35.8167           97       158     2012      07        16        198              0.260167      26.439850       3.011884       0.256345       0.231000   -9999.000000       0.163500       0.642000
53942     53942     shaanxi        109.5000       35.8167           97       158     2012      07        17        199              0.254000      26.074982       1.720973       0.240089       0.218000       0.305500       0.165400   -9999.000000
53942     53942     shaanxi        109.5000       35.8167           97       158     2012      07        18        200              0.250458      25.452728       0.000000       0.228045       0.225000       0.056700   -9999.000000       0.539000
53942     53942     shaanxi        109.5000       35.8167           97       158     2012      07        19        201              0.245750      26.810638       0.239138       0.213788       0.220000   -9999.000000       0.162900   -9999.000000
53942     53942     shaanxi        109.5000       35.8167           97       158     2012      07        20        202              0.242478      26.757355       0.321020       0.205570       0.225000   -9999.000000       0.166200       0.595000
53942     53942     shaanxi        109.5000       35.8167           97       158     2012      07        21        203              0.301875      27.427460      21.742641       0.201372   -9999.000000   -9999.000000       0.173100       1.000000
53942     53942     shaanxi        109.5000       35.8167           97       158     2012      07        22        204              0.306542      23.146423       2.627346       0.313840   -9999.000000       0.261500       0.168600       0.961000
53942     53942     shaanxi        109.5000       35.8167           97       158     2012      07        23        205              0.294750      25.700470       2.711213       0.298447       0.269000       0.254400   -9999.000000       0.885000
53942     53942     shaanxi        109.5000       35.8167           97       158     2012      07        24        206              0.299000      23.807556       1.863242       0.288826       0.252000   -9999.000000   -9999.000000   -9999.000000
53942     53942     shaanxi        109.5000       35.8167           97       158     2012      07        25        207              0.290125      24.966248       0.528811       0.295142       0.241000       0.227200       0.136600       0.888000
53942     53942     shaanxi        109.5000       35.8167           97       158     2012      07        26        208              0.279208      27.055908       9.875468       0.275976       0.250000       0.181100       0.155800       0.799000
53942     53942     shaanxi        109.5000       35.8167           97       158     2012      07        27        209              0.243625      28.447479       0.000000       0.259537       0.228000   -9999.000000       0.142400       0.828000
53942     53942     shaanxi        109.5000       35.8167           97       158     2012      07        28        210              0.220833      29.234711       1.369821       0.241206       0.244000   -9999.000000       0.144200       0.720000
53942     53942     shaanxi        109.5000       35.8167           97       158     2012      07        29        211              0.211583      29.825470       4.352980       0.230034       0.262000   -9999.000000   -9999.000000   -9999.000000
53942     53942     shaanxi        109.5000       35.8167           97       158     2012      07        30        212              0.204500      30.330200      12.983366       0.233480       0.285000   -9999.000000       0.120400       0.830000
53942     53942     shaanxi        109.5000       35.8167           97       158     2012      07        31        213              0.203458      26.681183       1.075411       0.301891       0.291500       0.137900       0.108000       0.883000
53942     53942     shaanxi        109.5000       35.8167           97       158     2012      08        01        214              0.203083      24.716766       0.658213       0.290550       0.236000   -9999.000000       0.111200       0.939000
53942     53942     shaanxi        109.5000       35.8167           97       158     2012      08        02        215              0.200208      26.294678       0.172792       0.271859   -9999.000000   -9999.000000       0.108000       0.732000
53942     53942     shaanxi        109.5000       35.8167           97       158     2012      08        03        216              0.196292      26.966003       0.000000       0.257739       0.236000   -9999.000000       0.110000   -9999.000000
53942     53942     shaanxi        109.5000       35.8167           97       158     2012      08        04        217              0.196542      27.500824       0.239158       0.244159       0.220000   -9999.000000   -9999.000000       0.698000
53942     53942     shaanxi        109.5000       35.8167           97       158     2012      08        05        218              0.194833      27.369354       2.848606       0.231825       0.254000       0.247100       0.110900       0.777000
53942     53942     shaanxi        109.5000       35.8167           97       158     2012      08        06        219              0.196583      26.381287       0.642472       0.249605       0.240000   -9999.000000       0.130400       0.663000
53942     53942     shaanxi        109.5000       35.8167           97       158     2012      08        07        220              0.197375      26.759460       1.635829       0.239053       0.226000   -9999.000000       0.113900       0.548000
53942     53942     shaanxi        109.5000       35.8167           97       158     2012      08        08        221              0.195500      29.485504       1.817971       0.218815       0.257000   -9999.000000       0.119900   -9999.000000
53942     53942     shaanxi        109.5000       35.8167           97       158     2012      08        09        222              0.193417      28.373993       0.159289       0.223231       0.263000   -9999.000000   -9999.000000       0.745000
53942     53942     shaanxi        109.5000       35.8167           97       158     2012      08        10        223              0.191042      28.865051       0.000000       0.211811       0.244000       0.084600   -9999.000000   -9999.000000
53942     53942     shaanxi        109.5000       35.8167           97       158     2012      08        11        224              0.188708      28.666992       5.800546       0.195842       0.266000   -9999.000000       0.122600       0.649000
53942     53942     shaanxi        109.5000       35.8167           97       158     2012      08        12        225              0.185083      29.516663       0.622596       0.207875       0.269000       0.452600       0.122300   -9999.000000
53942     53942     shaanxi        109.5000       35.8167           97       158     2012      08        13        226              0.209292      26.836578      52.370686       0.246101   -9999.000000       0.096100       0.095000   -9999.000000
53942     53942     shaanxi        109.5000       35.8167           97       158     2012      08        14        227              0.301292      23.395538      15.084659       0.333969       0.257000   -9999.000000       0.092100       0.939000
53942     53942     shaanxi        109.5000       35.8167           97       158     2012      08        15        228              0.284750      23.267426       0.000000       0.363411       0.235500       0.295500   -9999.000000   -9999.000000
53942     53942     shaanxi        109.5000       35.8167           97       158     2012      08        16        229              0.273833      25.887817       0.265565       0.328130       0.241000       0.067300       0.085500       0.811000
53942     53942     shaanxi        109.5000       35.8167           97       158     2012      08        17        230              0.290042      25.466248      66.816063       0.315366   -9999.000000   -9999.000000       0.078800   -9999.000000
53942     53942     shaanxi        109.5000       35.8167           97       158     2012      08        18        231              0.305875      24.089081      12.104857       0.373932   -9999.000000       0.176900       0.095100       1.000000
53942     53942     shaanxi        109.5000       35.8167           97       158     2012      08        19        232              0.296583      21.080017       1.533645       0.376543       0.279000   -9999.000000       0.094200       0.958000
53942     53942     shaanxi        109.5000       35.8167           97       158     2012      08        20        233              0.289625      21.883118       1.327479       0.354374       0.269000       0.141400       0.116700       0.920000
53942     53942     shaanxi        109.5000       35.8167           97       158     2012      08        21        234              0.278375      23.266296       0.000000       0.344511       0.247500   -9999.000000   -9999.000000       0.974000
53942     53942     shaanxi        109.5000       35.8167           97       158     2012      08        22        235              0.270000      20.797333       0.000000       0.334588       0.249000       0.076500       0.105300   -9999.000000
53942     53942     shaanxi        109.5000       35.8167           97       158     2012      08        23        236              0.264417      21.454926       0.000000       0.329214       0.250000       0.219200       0.116300       0.818000
53942     53942     shaanxi        109.5000       35.8167           97       158     2012      08        24        237              0.259583      21.520233       0.000000       0.324040   -9999.000000   -9999.000000       0.105600   -9999.000000
53942     53942     shaanxi        109.5000       35.8167           97       158     2012      08        25        238              0.000000      22.160645       7.525404       0.320362   -9999.000000       0.197900       0.104700   -9999.000000
53942     53942     shaanxi        109.5000       35.8167           97       158     2012      08        26        239              0.256458      22.856537       0.000000       0.334302       0.262500   -9999.000000   -9999.000000       0.771000
53942     53942     shaanxi        109.5000       35.8167           97       158     2012      08        27        240              0.254292      23.776398       1.229477       0.328857       0.277500   -9999.000000       0.129900   -9999.000000
53942     53942     shaanxi        109.5000       35.8167           97       158     2012      08        28        241              0.253625      22.714722       1.121178       0.325324       0.237000       0.226800       0.113100       0.818000
53942     53942     shaanxi        109.5000       35.8167           97       158     2012      08        29        242              0.250167      23.443451       0.000000       0.319008   -9999.000000   -9999.000000       0.124300       0.763000
53942     53942     shaanxi        109.5000       35.8167           97       158     2012      08        30        243              0.245125      23.954895       2.342476       0.311693       0.229000   -9999.000000       0.115900       0.787000
53942     53942     shaanxi        109.5000       35.8167           97       158     2012      08        31        244              0.258750      24.310730      22.415695       0.310480       0.305000       0.076600       0.144400       1.000000
53942     53942     shaanxi        109.5000       35.8167           97       158     2012      09        01        245              0.308750      21.110626      29.958721       0.350293       0.264000   -9999.000000   -9999.000000   -9999.000000
53942     53942     shaanxi        109.5000       35.8167           97       158     2012      09        02        246              0.294125      18.061890       0.125137       0.383929       0.255000       0.176000       0.124800       0.891000
53942     53942     shaanxi        109.5000       35.8167           97       158     2012      09        03        247              0.286833      19.655975       0.000000       0.351849       0.238000   -9999.000000       0.111900       0.844000
53942     53942     shaanxi        109.5000       35.8167           97       158     2012      09        04        248              0.280208      20.625793       0.000000       0.341722       0.254000       0.239300       0.110300       0.928000
53942     53942     shaanxi        109.5000       35.8167           97       158     2012      09        05        249              0.274708      21.824860       0.000000       0.335543       0.239000       0.127000       0.108400       0.782000
53942     53942     shaanxi        109.5000       35.8167           97       158     2012      09        06        250              0.271708      22.209656       0.367665       0.332409       0.230500   -9999.000000       0.104800   -9999.000000
53942     53942     shaanxi        109.5000       35.8167           97       158     2012      09        07        251              0.272042      20.223572       2.282348       0.332921       0.286000   -9999.000000   -9999.000000       0.799000
53942     53942     shaanxi        109.5000       35.8167           97       158     2012      09        08        252              0.272458      21.629608       0.906073       0.331784       0.251000   -9999.000000       0.098500   -9999.000000
53942     53942     shaanxi        109.5000       35.8167           97       158     2012      09        09        253              0.266917      22.336609       0.669952       0.327448       0.242000       0.040800       0.110400       0.693000
53942     53942     shaanxi        109.5000       35.8167           97       158     2012      09        10        254              0.295417      21.849304      25.481277       0.322737       0.276000       0.068900       0.132800   -9999.000000
53942     53942     shaanxi        109.5000       35.8167           97       158     2012      09        11        255              0.292458      18.194824       3.142044       0.370336       0.244000   -9999.000000       0.139200   -9999.000000
53942     53942     shaanxi        109.5000       35.8167           97       158     2012      09        12        256              0.279667      19.456635       0.435638       0.350779       0.253500       0.111800   -9999.000000       0.822000
53942     53942     shaanxi        109.5000       35.8167           97       158     2012      09        13        257              0.271708      16.163147       0.000000       0.339254       0.246000       0.138700       0.132900   -9999.000000
53942     53942     shaanxi        109.5000       35.8167           97       158     2012      09        14        258              0.266667      16.436127       0.000000       0.333463   -9999.000000   -9999.000000       0.121000       0.615000
53942     53942     shaanxi        109.5000       35.8167           97       158     2012      09        15        259              0.262250      17.120911       0.573439       0.329053       0.252000       0.109200       0.135900   -9999.000000
53942     53942     shaanxi        109.5000       35.8167           97       158     2012      09        16        260              0.260292      17.675140       0.195451       0.327390       0.253500   -9999.000000       0.132800       0.729000
53942     53942     shaanxi        109.5000       35.8167           97       158     2012      09        17        261              0.257750      17.203644       0.348849       0.328508       0.241000   -9999.000000       0.123300       0.721000
53942     53942     shaanxi        109.5000       35.8167           97       158     2012      09        18        262              0.251250      17.919434       0.000000       0.326640       0.252000   -9999.000000   -9999.000000       0.808000
53942     53942     shaanxi        109.5000       35.8167           97       158     2012      09        19        263              0.248833      18.326324       0.000000       0.322779       0.235000   -9999.000000       0.122700       0.679000
53942     53942     shaanxi        109.5000       35.8167           97       158     2012      09        20        264              0.248870      19.231964       6.107862       0.318760       0.290000       0.013200       0.135600   -9999.000000
53942     53942     shaanxi        109.5000       35.8167           97       158     2012      09        21        265              0.256083      17.639465       0.000000       0.333839   -9999.000000   -9999.000000       0.125400       0.930000
53942     53942     shaanxi        109.5000       35.8167           97       158     2012      09        22        266              0.254125      19.349701       0.000000       0.329307       0.201000       0.177500       0.128600       0.864000
53942     53942     shaanxi        109.5000       35.8167           97       158     2012      09        23        267              0.251250      19.306641       0.000000       0.323766       0.212000   -9999.000000       0.125200       0.833000
53942     53942     shaanxi        109.5000       35.8167           97       158     2012      09        24        268              0.248042      19.209686       0.670298       0.319827       0.209000   -9999.000000   -9999.000000       0.654000
53942     53942     shaanxi        109.5000       35.8167           97       158     2012      09        25        269              0.268667      19.004242      13.218516       0.318964   -9999.000000   -9999.000000       0.129600   -9999.000000
53942     53942     shaanxi        109.5000       35.8167           97       158     2012      09        26        270              0.272542      15.156036       0.000000       0.352833       0.218000       0.093100       0.149100       0.895000
53942     53942     shaanxi        109.5000       35.8167           97       158     2012      09        27        271              0.268071      16.460632       0.000000       0.336030       0.209500       0.082500       0.143500       0.788000
53942     53942     shaanxi        109.5000       35.8167           97       158     2012      09        28        272              0.252467      15.822418       0.000000       0.327782       0.213500   -9999.000000       0.151100       0.777000
53942     53942     shaanxi        109.5000       35.8167           97       158     2012      09        29        273              0.248208      13.856964       0.000000       0.322839       0.218000   -9999.000000   -9999.000000       0.645000
53942     53942     shaanxi        109.5000       35.8167           97       158     2012      09        30        274              0.243208      14.663483       0.000000       0.319476       0.197000   -9999.000000       0.140600   -9999.000000
53942     53942     shaanxi        109.5000       35.8167           97       158     2012      10        01        275              0.239417      15.198090       0.000000       0.316366       0.181000   -9999.000000       0.105600       0.660000
53942     53942     shaanxi        109.5000       35.8167           97       158     2012      10        02        276              0.237000      16.730621       0.000000       0.313655       0.171000   -9999.000000       0.115000       0.724000
53942     53942     shaanxi        109.5000       35.8167           97       158     2012      10        03        277              0.233833      16.971313       0.165317       0.313516       0.172000       0.086700       0.107200       0.751000
53942     53942     shaanxi        109.5000       35.8167           97       158     2012      10        04        278              0.230250      17.418304       0.000000       0.310666       0.213000   -9999.000000       0.116600       0.594000
53942     53942     shaanxi        109.5000       35.8167           97       158     2012      10        05        279              0.228000      15.234009       0.000000       0.310551       0.179000   -9999.000000   -9999.000000   -9999.000000
53942     53942     shaanxi        109.5000       35.8167           97       158     2012      10        06        280              0.225875      15.218750       0.000000       0.308587       0.183000   -9999.000000       0.112700       0.698000
53942     53942     shaanxi        109.5000       35.8167           97       158     2012      10        07        281              0.224708      15.865814       0.000000       0.306336       0.180000   -9999.000000       0.115900   -9999.000000
53942     53942     shaanxi        109.5000       35.8167           97       158     2012      10        08        282              0.224333      14.185272       0.178385       0.308639       0.176000       0.181500       0.100300       0.651000
53942     53942     shaanxi        109.5000       35.8167           97       158     2012      10        09        283              0.220833      14.628387       0.108667       0.307884       0.172500   -9999.000000       0.102000   -9999.000000
53942     53942     shaanxi        109.5000       35.8167           97       158     2012      10        10        284              0.218333      14.228180       0.000000       0.303708       0.177000   -9999.000000   -9999.000000   -9999.000000
53942     53942     shaanxi        109.5000       35.8167           97       158     2012      10        11        285              0.217375      14.966248       0.000000       0.301254       0.140000   -9999.000000   -9999.000000       0.672000
53942     53942     shaanxi        109.5000       35.8167           97       158     2012      10        12        286              0.215667      16.309021       0.000000       0.300311       0.134000   -9999.000000       0.087900   -9999.000000
53942     53942     shaanxi        109.5000       35.8167           97       158     2012      10        13        287              0.213333      15.507568       0.000000       0.298652       0.132500   -9999.000000       0.106300       0.592000
53942     53942     shaanxi        109.5000       35.8167           97       158     2012      10        14        288              0.211917      15.536316       0.276292       0.295605       0.128500       0.066600       0.102200   -9999.000000
53942     53942     shaanxi        109.5000       35.8167           97       158     2012      10        15        289              0.211375      14.112244       1.940796       0.296687       0.150000   -9999.000000       0.101800       0.514000
53942     53942     shaanxi        109.5000       35.8167           97       158     2012      10        16        290              0.213250      12.999146       8.775920       0.303326       0.141000   -9999.000000   -9999.000000       0.658000
53942     53942     shaanxi        109.5000       35.8167           97       158     2012      10        17        291              0.212417      10.630920       0.131065       0.301884       0.150000   -9999.000000       0.097800       0.697000
53942     53942     shaanxi        109.5000       35.8167           97       158     2012      10        18        292              0.212458      10.905029       0.508969       0.296759       0.142000       0.082900       0.091100       0.600000
53942     53942     shaanxi        109.5000       35.8167           97       158     2012      10        19        293              0.214542      11.289368       0.000000       0.299068       0.136000   -9999.000000       0.100800   -9999.000000
53942     53942     shaanxi        109.5000       35.8167           97       158     2012      10        20        294              0.214792      13.366608       0.000000       0.296571       0.148000   -9999.000000       0.100600       0.609000
53942     53942     shaanxi        109.5000       35.8167           97       158     2012      10        21        295              0.214000      15.170959       2.114271       0.294314   -9999.000000       0.032100       0.101300       0.739000
53942     53942     shaanxi        109.5000       35.8167           97       158     2012      10        22        296              0.216417       8.765350       0.156284       0.305083   -9999.000000   -9999.000000   -9999.000000       0.826000
53942     53942     shaanxi        109.5000       35.8167           97       158     2012      10        23        297              0.216000       9.305969       0.000000       0.299272   -9999.000000   -9999.000000       0.078600       0.550000
53942     53942     shaanxi        109.5000       35.8167           97       158     2012      10        24        298              0.215583       7.951324       0.000000       0.298132   -9999.000000   -9999.000000       0.086800   -9999.000000
53942     53942     shaanxi        109.5000       35.8167           97       158     2012      10        25        299              0.000000      10.112823       0.000000       0.295721       0.146000       0.103100       0.079100       0.539000
53942     53942     shaanxi        109.5000       35.8167           97       158     2012      10        26        300              0.213875      11.013367       0.000000       0.294142       0.152000       0.155000       0.085600       0.606000
53942     53942     shaanxi        109.5000       35.8167           97       158     2012      10        27        301              0.212000      11.047943       0.000000       0.293757       0.141000   -9999.000000   -9999.000000       0.649000
53942     53942     shaanxi        109.5000       35.8167           97       158     2012      10        28        302              0.000000      11.923767       0.467695       0.291611       0.150000       0.121800       0.086700       0.553000
53942     53942     shaanxi        109.5000       35.8167           97       158     2012      10        29        303              0.210250      10.985931       0.000000       0.292957       0.151000       0.015700       0.063100   -9999.000000
53942     53942     shaanxi        109.5000       35.8167           97       158     2012      10        30        304              0.207125       9.907623       0.000000       0.290860       0.143000   -9999.000000       0.075300       0.457000
53942     53942     shaanxi        109.5000       35.8167           97       158     2012      10        31        305              0.204792       8.570282       0.000000       0.287603       0.162500       0.061000       0.068600       0.537000
53942     53942     shaanxi        109.5000       35.8167           97       158     2012      11        01        306              0.203167       8.279205       0.000000       0.285546       0.120000   -9999.000000       0.073300       0.621000
53942     53942     shaanxi        109.5000       35.8167           97       158     2012      11        02        307              0.201958       9.007111       1.561994       0.285781   -9999.000000       0.253700   -9999.000000       0.547000
53942     53942     shaanxi        109.5000       35.8167           97       158     2012      11        03        308              0.201958      10.360382       0.347061       0.289131   -9999.000000   -9999.000000       0.069400   -9999.000000
53942     53942     shaanxi        109.5000       35.8167           97       158     2012      11        04        309              0.199875       3.623322       0.253966       0.276028       0.132000   -9999.000000       0.073600       0.397000
53942     53942     shaanxi        109.5000       35.8167           97       158     2012      11        05        310              0.199458       2.981323       0.551008       0.265252       0.127000   -9999.000000       0.061300   -9999.000000
53942     53942     shaanxi        109.5000       35.8167           97       158     2012      11        06        311              0.200250       3.980408       0.000000       0.270141       0.132000       0.031500       0.068700       0.567000
53942     53942     shaanxi        109.5000       35.8167           97       158     2012      11        07        312              0.200292       6.355316       0.079533       0.283721       0.148000   -9999.000000       0.068500   -9999.000000
53942     53942     shaanxi        109.5000       35.8167           97       158     2012      11        08        313              0.199833       5.250458       0.000000       0.284913       0.139000       0.028800   -9999.000000   -9999.000000
53942     53942     shaanxi        109.5000       35.8167           97       158     2012      11        09        314              0.199292       6.588074       0.665808       0.284772       0.143500   -9999.000000       0.059800       0.653000
53942     53942     shaanxi        109.5000       35.8167           97       158     2012      11        10        315              0.201375       5.223755       0.093449       0.288516       0.136000       0.050200       0.061100   -9999.000000
53942     53942     shaanxi        109.5000       35.8167           97       158     2012      11        11        316              0.200000       3.028229       0.326385       0.262571       0.141000   -9999.000000       0.063900       0.315000
53942     53942     shaanxi        109.5000       35.8167           97       158     2012      11        12        317              0.199917       2.651611       0.000000       0.252960       0.127000   -9999.000000       0.057900   -9999.000000
53942     53942     shaanxi        109.5000       35.8167           97       158     2012      11        13        318              0.000000       4.528595       0.000000       0.273880   -9999.000000       0.005800   -9999.000000       0.399000
53942     53942     shaanxi        109.5000       35.8167           97       158     2012      11        14        319              0.200542       5.379120       0.000000       0.276008       0.130000   -9999.000000       0.059900       0.554000
53942     53942     shaanxi        109.5000       35.8167           97       158     2012      11        15        320              0.200292       6.046814       1.516580       0.280816   -9999.000000   -9999.000000       0.045200       0.544000
53942     53942     shaanxi        109.5000       35.8167           97       158     2012      11        16        321              0.204917       3.021332       0.146271       0.284461       0.140000   -9999.000000       0.055000       0.461000
53942     53942     shaanxi        109.5000       35.8167           97       158     2012      11        17        322              0.000000       3.984009       0.140848       0.275685       0.130000   -9999.000000       0.056200   -9999.000000
53942     53942     shaanxi        109.5000       35.8167           97       158     2012      11        18        323              0.205625       5.629913       0.000000       0.281145   -9999.000000   -9999.000000       0.058600       0.537000
53942     53942     shaanxi        109.5000       35.8167           97       158     2012      11        19        324              0.204417       5.588806       0.000000       0.277662       0.128000       0.063100   -9999.000000       0.585000
53942     53942     shaanxi        109.5000       35.8167           97       158     2012      11        20        325              0.204167       5.708252       0.068574       0.280931       0.123000       0.175000       0.046600       0.597000
53942     53942     shaanxi        109.5000       35.8167           97       158     2012      11        21        326              0.203583       4.465393       0.000000       0.284578       0.112000   -9999.000000       0.053100       0.404000
53942     53942     shaanxi        109.5000       35.8167           97       158     2012      11        22        327              0.201375       5.609039       0.000000       0.284472       0.120000   -9999.000000       0.045300   -9999.000000
53942     53942     shaanxi        109.5000       35.8167           97       158     2012      11        23        328              0.199708       2.929443       0.000000       0.267819       0.116000       0.186300       0.051900       0.378000
53942     53942     shaanxi        109.5000       35.8167           97       158     2012      11        24        329              0.198208       2.257507       0.124256       0.247159       0.118000       0.026900   -9999.000000       0.525000
53942     53942     shaanxi        109.5000       35.8167           97       158     2012      11        25        330              0.198583       2.591217       0.000000       0.267339   -9999.000000       0.086100   -9999.000000       0.499000
53942     53942     shaanxi        109.5000       35.8167           97       158     2012      11        26        331              0.196208       2.212555       0.000000       0.252961       0.110000       0.038900   -9999.000000       0.194000
53942     53942     shaanxi        109.5000       35.8167           97       158     2012      11        27        332              0.194958       1.292175       0.000000       0.234376       0.126000   -9999.000000       0.040400   -9999.000000
53942     53942     shaanxi        109.5000       35.8167           97       158     2012      11        28        333              0.192292       2.563538       0.038967       0.249909       0.113000       0.056600       0.038000       0.112000
53942     53942     shaanxi        109.5000       35.8167           97       158     2012      11        29        334              0.180833      -0.379150       0.000000       0.218128   -9999.000000   -9999.000000       0.044100       0.208000
53942     53942     shaanxi        109.5000       35.8167           97       158     2012      11        30        335              0.174167      -0.750336       0.000000       0.208224   -9999.000000   -9999.000000   -9999.000000       0.340000
53942     53942     shaanxi        109.5000       35.8167           97       158     2012      12        01        336              0.188750       0.886597       0.103295       0.228282   -9999.000000   -9999.000000       0.040200       0.270000
53942     53942     shaanxi        109.5000       35.8167           97       158     2012      12        02        337              0.191417      -0.003571       0.128960       0.220909       0.112000   -9999.000000       0.034700   -9999.000000
53942     53942     shaanxi        109.5000       35.8167           97       158     2012      12        03        338              0.190292       1.288086       0.000000       0.240779       0.120000   -9999.000000       0.041900       0.182000
53942     53942     shaanxi        109.5000       35.8167           97       158     2012      12        04        339              0.185167       0.849762       0.000000       0.228852       0.120000       0.064400       0.041700   -9999.000000
53942     53942     shaanxi        109.5000       35.8167           97       158     2012      12        05        340              0.184833       2.043823       0.000000       0.242969   -9999.000000   -9999.000000       0.040800       0.129000
53942     53942     shaanxi        109.5000       35.8167           97       158     2012      12        06        341              0.182250       0.807526       0.000000       0.225778       0.110000   -9999.000000   -9999.000000   -9999.000000
53942     53942     shaanxi        109.5000       35.8167           97       158     2012      12        07        342              0.187125       2.020050       0.000000       0.243283       0.104000       0.066100       0.034700   -9999.000000
53942     53942     shaanxi        109.5000       35.8167           97       158     2012      12        08        343              0.178042       1.362305       0.000000       0.233264       0.120000       0.167900       0.040300       0.066000
53942     53942     shaanxi        109.5000       35.8167           97       158     2012      12        09        344              0.156000      -0.756744       0.000000       0.209066       0.113000   -9999.000000       0.036800   -9999.000000
53942     53942     shaanxi        109.5000       35.8167           97       158     2012      12        10        345              0.144583      -0.748199       0.000000       0.204852   -9999.000000   -9999.000000       0.039400       0.158000
53942     53942     shaanxi        109.5000       35.8167           97       158     2012      12        11        346              0.133875       0.032867       0.000000       0.213973   -9999.000000   -9999.000000   -9999.000000   -9999.000000
53942     53942     shaanxi        109.5000       35.8167           97       158     2012      12        12        347              0.133750      -0.599823       0.122533       0.205816       0.096000       0.026800       0.043100       0.041000
53942     53942     shaanxi        109.5000       35.8167           97       158     2012      12        13        348              0.137708       0.153168       0.000000       0.213380   -9999.000000   -9999.000000       0.032700       0.197000
53942     53942     shaanxi        109.5000       35.8167           97       158     2012      12        14        349              0.140208      -0.748047       0.141622       0.198801       0.108000       0.010500       0.042800       0.190000
53942     53942     shaanxi        109.5000       35.8167           97       158     2012      12        15        350              0.000000      -0.125427       0.000000       0.211493   -9999.000000   -9999.000000       0.040200       0.261000
53942     53942     shaanxi        109.5000       35.8167           97       158     2012      12        16        351              0.146333      -0.647217       9.368799       0.198109   -9999.000000   -9999.000000       0.041900   -9999.000000
53942     53942     shaanxi        109.5000       35.8167           97       158     2012      12        17        352              0.142792      -0.272614       0.181654       0.209521   -9999.000000       0.021700   -9999.000000       0.184000
53942     53942     shaanxi        109.5000       35.8167           97       158     2012      12        18        353              0.130042      -1.420319       0.129742       0.197169       0.099000   -9999.000000       0.037800       0.122000
53942     53942     shaanxi        109.5000       35.8167           97       158     2012      12        19        354              0.127542      -0.895996       0.000000       0.202719   -9999.000000   -9999.000000       0.041300       0.086000
53942     53942     shaanxi        109.5000       35.8167           97       158     2012      12        20        355              0.000000      -1.258453       0.361356       0.190838   -9999.000000   -9999.000000       0.040300       0.004000
53942     53942     shaanxi        109.5000       35.8167           97       158     2012      12        21        356              0.124042      -2.673431       0.091452       0.178616   -9999.000000       0.269600       0.038600   -9999.000000
53942     53942     shaanxi        109.5000       35.8167           97       158     2012      12        22        357              0.117792      -3.741943       0.000000       0.171345   -9999.000000   -9999.000000       0.036100       0.055000
53942     53942     shaanxi        109.5000       35.8167           97       158     2012      12        23        358              0.110833      -6.569183       0.107350       0.156122   -9999.000000   -9999.000000   -9999.000000       0.003000
53942     53942     shaanxi        109.5000       35.8167           97       158     2012      12        24        359              0.110105      -7.828979       0.157184       0.148324       0.105000   -9999.000000       0.028200       0.063000
53942     53942     shaanxi        109.5000       35.8167           97       158     2012      12        25        360              0.110167      -4.699127       0.557724       0.163749   -9999.000000   -9999.000000       0.034300       0.012000
53942     53942     shaanxi        109.5000       35.8167           97       158     2012      12        26        361              0.000000      -4.547760       0.000000       0.166515   -9999.000000       0.184200       0.035200   -9999.000000
53942     53942     shaanxi        109.5000       35.8167           97       158     2012      12        27        362              0.110417      -4.442841       0.077508       0.161159   -9999.000000       0.013900       0.038400       0.007000
53942     53942     shaanxi        109.5000       35.8167           97       158     2012      12        28        363              0.000000      -3.551300       0.000000       0.172269   -9999.000000   -9999.000000   -9999.000000       0.042000
53942     53942     shaanxi        109.5000       35.8167           97       158     2012      12        29        364              0.000000      -4.514984       0.000000       0.163203   -9999.000000   -9999.000000       0.034000       0.021000
53942     53942     shaanxi        109.5000       35.8167           97       158     2012      12        30        365              0.000000      -7.904755       0.113985       0.150764   -9999.000000   -9999.000000       0.028500   -9999.000000
53942     53942     shaanxi        109.5000       35.8167           97       158     2012      12        31        366              0.107400      -6.041565       0.091013       0.155099       0.098000   -9999.000000       0.031000   -9999.000000
