# Supplementary material for: Research on Fusing Multisatellite Soil Moisture Data Based on Bayesian Model Averaging
Source: Hindawi journal article supplement (doi:10.1155/2018/9310838), 2018-06-25
Supplement: f1 [file 9310838.f1.zip › 2012_sm00-10cm_daily_ZDB_ZHY_53954_366days_allin.txt]

53954     53954     shanxi         110.9667       35.6167           98       164     2012      01        01        001              0.000000   -9999.000000       0.000000   -9999.000000   -9999.000000   -9999.000000       0.067300   -9999.000000
53954     53954     shanxi         110.9667       35.6167           98       164     2012      01        02        002              0.104750      -0.644867       0.000000       0.180896   -9999.000000   -9999.000000       0.078900       0.149000
53954     53954     shanxi         110.9667       35.6167           98       164     2012      01        03        003              0.000000      -0.225708       0.000000       0.183388   -9999.000000       0.048100   -9999.000000   -9999.000000
53954     53954     shanxi         110.9667       35.6167           98       164     2012      01        04        004              0.083667      -2.123291      55.766693       0.173993   -9999.000000       0.096200       0.019400   -9999.000000
53954     53954     shanxi         110.9667       35.6167           98       164     2012      01        05        005              0.074250      -2.385986       0.000000       0.171667   -9999.000000   -9999.000000       0.076800       0.019000
53954     53954     shanxi         110.9667       35.6167           98       164     2012      01        06        006              0.076292      -2.399536       0.000000       0.171514   -9999.000000   -9999.000000       0.066600   -9999.000000
53954     53954     shanxi         110.9667       35.6167           98       164     2012      01        07        007              0.085333      -0.791168       0.000000       0.178146   -9999.000000   -9999.000000       0.078400       0.122000
53954     53954     shanxi         110.9667       35.6167           98       164     2012      01        08        008              0.000000      -0.624939       0.000000       0.179855       0.094000       0.108900   -9999.000000   -9999.000000
53954     53954     shanxi         110.9667       35.6167           98       164     2012      01        09        009              0.082375       0.235687       0.000000       0.182923   -9999.000000   -9999.000000   -9999.000000       0.080000
53954     53954     shanxi         110.9667       35.6167           98       164     2012      01        10        010              0.086000       0.382599       0.000000       0.183281   -9999.000000       0.060400       0.024900       0.051000
53954     53954     shanxi         110.9667       35.6167           98       164     2012      01        11        011              0.085000       0.537750       0.000000       0.183714       0.076000   -9999.000000       0.066400       0.073000
53954     53954     shanxi         110.9667       35.6167           98       164     2012      01        12        012              0.083125       0.473969       0.000000       0.182194   -9999.000000       0.063900       0.055600       0.141000
53954     53954     shanxi         110.9667       35.6167           98       164     2012      01        13        013              0.083304       0.475037       0.000000       0.181961       0.101000       0.027100       0.063900   -9999.000000
53954     53954     shanxi         110.9667       35.6167           98       164     2012      01        14        014              0.083167       0.868561       0.000000       0.183277   -9999.000000   -9999.000000   -9999.000000       0.124000
53954     53954     shanxi         110.9667       35.6167           98       164     2012      01        15        015              0.082000       0.235138       0.000000       0.180750   -9999.000000       0.159700       0.046000       0.039000
53954     53954     shanxi         110.9667       35.6167           98       164     2012      01        16        016              0.088750       1.085693       0.000000       0.183800   -9999.000000   -9999.000000       0.058500       0.041000
53954     53954     shanxi         110.9667       35.6167           98       164     2012      01        17        017              0.000000       0.686249       0.000000       0.183527   -9999.000000   -9999.000000       0.047900       0.031000
53954     53954     shanxi         110.9667       35.6167           98       164     2012      01        18        018              0.087333       0.908417       0.000000       0.185731   -9999.000000       0.014700       0.057100   -9999.000000
53954     53954     shanxi         110.9667       35.6167           98       164     2012      01        19        019              0.091917       1.463837       0.092398       0.186844   -9999.000000   -9999.000000   -9999.000000       0.045000
53954     53954     shanxi         110.9667       35.6167           98       164     2012      01        20        020              0.102167       1.306610       0.169893       0.188392   -9999.000000       0.017100   -9999.000000       0.218000
53954     53954     shanxi         110.9667       35.6167           98       164     2012      01        21        021              0.097000       0.647430       0.000000       0.187682   -9999.000000   -9999.000000       0.010300       0.103000
53954     53954     shanxi         110.9667       35.6167           98       164     2012      01        22        022              0.089875      -1.490631       0.957273       0.178481   -9999.000000       0.203600       0.053800       0.114000
53954     53954     shanxi         110.9667       35.6167           98       164     2012      01        23        023              0.074375      -2.408234       0.000000       0.172572   -9999.000000       0.038800       0.053500   -9999.000000
53954     53954     shanxi         110.9667       35.6167           98       164     2012      01        24        024              0.069875      -2.633057       0.000000       0.170212   -9999.000000   -9999.000000   -9999.000000       0.002000
53954     53954     shanxi         110.9667       35.6167           98       164     2012      01        25        025              0.068667      -2.932983       0.000000       0.168700   -9999.000000       0.109400   -9999.000000   -9999.000000
53954     53954     shanxi         110.9667       35.6167           98       164     2012      01        26        026              0.069583      -1.730713       0.916238       0.173196   -9999.000000   -9999.000000       0.063500       0.156000
53954     53954     shanxi         110.9667       35.6167           98       164     2012      01        27        027              0.072792      -0.469360       0.512854       0.178310   -9999.000000   -9999.000000       0.031100       0.005000
53954     53954     shanxi         110.9667       35.6167           98       164     2012      01        28        028              0.080417       0.394073       0.000000       0.182087       0.107000       0.034700       0.065500   -9999.000000
53954     53954     shanxi         110.9667       35.6167           98       164     2012      01        29        029              0.085292       1.496002       0.000000       0.184515       0.101000   -9999.000000       0.057800       0.006000
53954     53954     shanxi         110.9667       35.6167           98       164     2012      01        30        030              0.083792       1.841095       1.755409       0.185363   -9999.000000       0.059400       0.061000   -9999.000000
53954     53954     shanxi         110.9667       35.6167           98       164     2012      01        31        031              0.086583       1.939514       0.000000       0.185610   -9999.000000   -9999.000000   -9999.000000       0.188000
53954     53954     shanxi         110.9667       35.6167           98       164     2012      02        01        032              0.083625       3.183228      56.321510       0.188249   -9999.000000   -9999.000000       0.034300   -9999.000000
53954     53954     shanxi         110.9667       35.6167           98       164     2012      02        02        033              0.081500       0.826416       0.000000       0.181373       0.094000       0.075300       0.058100   -9999.000000
53954     53954     shanxi         110.9667       35.6167           98       164     2012      02        03        034              0.084042       0.650635       2.295664       0.178057       0.089000   -9999.000000       0.048000       0.030000
53954     53954     shanxi         110.9667       35.6167           98       164     2012      02        04        035              0.083417       1.784119       0.000000       0.179772   -9999.000000   -9999.000000       0.060500   -9999.000000
53954     53954     shanxi         110.9667       35.6167           98       164     2012      02        05        036              0.089417       0.971619       0.000000       0.178932   -9999.000000       0.102600   -9999.000000       0.189000
53954     53954     shanxi         110.9667       35.6167           98       164     2012      02        06        037              0.088292       2.326202       0.000000       0.183388   -9999.000000   -9999.000000   -9999.000000   -9999.000000
53954     53954     shanxi         110.9667       35.6167           98       164     2012      02        07        038              0.080417      -0.058319       0.000000       0.175701   -9999.000000       0.057400       0.010000       0.019000
53954     53954     shanxi         110.9667       35.6167           98       164     2012      02        08        039              0.074458      -0.986542       0.000000       0.170092   -9999.000000   -9999.000000       0.057000       0.074000
53954     53954     shanxi         110.9667       35.6167           98       164     2012      02        09        040              0.081958      -2.890411       0.000000       0.162525   -9999.000000       0.259000       0.047800       0.096000
53954     53954     shanxi         110.9667       35.6167           98       164     2012      02        10        041              0.090625      -0.797821       0.000000       0.170147   -9999.000000       0.042000       0.054700       0.156000
53954     53954     shanxi         110.9667       35.6167           98       164     2012      02        11        042              0.096333       0.883911       0.000000       0.173538   -9999.000000   -9999.000000   -9999.000000   -9999.000000
53954     53954     shanxi         110.9667       35.6167           98       164     2012      02        12        043              0.116000       2.929657       0.000000       0.178314   -9999.000000   -9999.000000   -9999.000000       0.115000
53954     53954     shanxi         110.9667       35.6167           98       164     2012      02        13        044              0.106375       1.846558       0.000000       0.177440   -9999.000000       0.009900   -9999.000000       0.100000
53954     53954     shanxi         110.9667       35.6167           98       164     2012      02        14        045              0.103375       1.715820       0.082775       0.178222       0.089000   -9999.000000       0.063600       0.233000
53954     53954     shanxi         110.9667       35.6167           98       164     2012      02        15        046              0.111458       3.328583       0.000000       0.181774   -9999.000000   -9999.000000       0.055400       0.095000
53954     53954     shanxi         110.9667       35.6167           98       164     2012      02        16        047              0.114083       3.481232       0.000000       0.181985   -9999.000000   -9999.000000       0.060300   -9999.000000
53954     53954     shanxi         110.9667       35.6167           98       164     2012      02        17        048              0.105917       3.025513       0.000000       0.177475   -9999.000000   -9999.000000   -9999.000000       0.035000
53954     53954     shanxi         110.9667       35.6167           98       164     2012      02        18        049              0.100000       1.505463       0.000000       0.173495       0.085000       0.038000       0.025900       0.088000
53954     53954     shanxi         110.9667       35.6167           98       164     2012      02        19        050              0.103792       2.034271       0.000000       0.172602       0.081000   -9999.000000       0.062000       0.199000
53954     53954     shanxi         110.9667       35.6167           98       164     2012      02        20        051              0.122417       4.058716       0.681266       0.175270   -9999.000000       0.090700       0.046200       0.161000
53954     53954     shanxi         110.9667       35.6167           98       164     2012      02        21        052              0.137833       5.551208       0.000000       0.177674   -9999.000000   -9999.000000   -9999.000000   -9999.000000
53954     53954     shanxi         110.9667       35.6167           98       164     2012      02        22        053              0.155958       5.590027       0.000000       0.179423       0.078000   -9999.000000   -9999.000000       0.172000
53954     53954     shanxi         110.9667       35.6167           98       164     2012      02        23        054              0.164625       7.217010       0.514855       0.180983   -9999.000000       0.158900   -9999.000000   -9999.000000
53954     53954     shanxi         110.9667       35.6167           98       164     2012      02        24        055              0.166500       4.528015       0.000000       0.178277       0.085000   -9999.000000       0.010000       0.320000
53954     53954     shanxi         110.9667       35.6167           98       164     2012      02        25        056              0.165042       5.473358       0.306419       0.179245   -9999.000000       0.194600       0.056600       0.218000
53954     53954     shanxi         110.9667       35.6167           98       164     2012      02        26        057              0.164500       2.788452       1.147195       0.177644   -9999.000000   -9999.000000       0.050800   -9999.000000
53954     53954     shanxi         110.9667       35.6167           98       164     2012      02        27        058              0.163750       4.745880       0.000000       0.178840   -9999.000000   -9999.000000   -9999.000000       0.249000
53954     53954     shanxi         110.9667       35.6167           98       164     2012      02        28        059              0.163167       5.368774       0.000000       0.179484       0.080000       0.141700   -9999.000000   -9999.000000
53954     53954     shanxi         110.9667       35.6167           98       164     2012      02        29        060              0.000000   -9999.000000       0.000000   -9999.000000       0.085000   -9999.000000   -9999.000000   -9999.000000
53954     53954     shanxi         110.9667       35.6167           98       164     2012      03        01        061              0.161292       5.507843       0.159123       0.179734   -9999.000000   -9999.000000       0.038400   -9999.000000
53954     53954     shanxi         110.9667       35.6167           98       164     2012      03        02        062              0.160333       4.550049       0.000000       0.184032   -9999.000000       0.049400       0.061100   -9999.000000
53954     53954     shanxi         110.9667       35.6167           98       164     2012      03        03        063              0.159125       4.914368       0.000000       0.184408   -9999.000000   -9999.000000       0.052100       0.264000
53954     53954     shanxi         110.9667       35.6167           98       164     2012      03        04        064              0.158125       4.452881       0.076066       0.183011   -9999.000000       0.073100       0.058000   -9999.000000
53954     53954     shanxi         110.9667       35.6167           98       164     2012      03        05        065              0.157625       4.527252       0.491373       0.183370       0.103000   -9999.000000   -9999.000000       0.300000
53954     53954     shanxi         110.9667       35.6167           98       164     2012      03        06        066              0.155375       5.943787       0.637610       0.183318   -9999.000000   -9999.000000       0.022800   -9999.000000
53954     53954     shanxi         110.9667       35.6167           98       164     2012      03        07        067              0.000000       4.087433       0.259839       0.179826   -9999.000000       0.154600       0.057200       0.223000
53954     53954     shanxi         110.9667       35.6167           98       164     2012      03        08        068              0.155292       7.619049       0.118764       0.180216   -9999.000000   -9999.000000       0.044700       0.266000
53954     53954     shanxi         110.9667       35.6167           98       164     2012      03        09        069              0.154292       7.343384       1.319776       0.178869       0.078000   -9999.000000       0.054300       0.272000
53954     53954     shanxi         110.9667       35.6167           98       164     2012      03        10        070              0.154292       8.108276       0.000000       0.178573       0.097000   -9999.000000   -9999.000000       0.353000
53954     53954     shanxi         110.9667       35.6167           98       164     2012      03        11        071              0.152583      10.071930       0.000000       0.176732       0.088000       0.152500       0.052300   -9999.000000
53954     53954     shanxi         110.9667       35.6167           98       164     2012      03        12        072              0.150292       8.405365       5.071646       0.174047   -9999.000000       0.307600       0.010800       0.263000
53954     53954     shanxi         110.9667       35.6167           98       164     2012      03        13        073              0.151500       8.158539       0.000000       0.173674   -9999.000000   -9999.000000       0.059500       0.221000
53954     53954     shanxi         110.9667       35.6167           98       164     2012      03        14        074              0.150625      11.598541       0.183161       0.172949       0.086000   -9999.000000   -9999.000000       0.313000
53954     53954     shanxi         110.9667       35.6167           98       164     2012      03        15        075              0.152583      11.942078       0.562484       0.173033   -9999.000000   -9999.000000       0.079900       0.600000
53954     53954     shanxi         110.9667       35.6167           98       164     2012      03        16        076              0.156083       7.123077       0.000000       0.186563       0.090000   -9999.000000   -9999.000000   -9999.000000
53954     53954     shanxi         110.9667       35.6167           98       164     2012      03        17        077              0.157958      11.784760       0.000000       0.183827       0.089000       0.226300       0.050700       0.305000
53954     53954     shanxi         110.9667       35.6167           98       164     2012      03        18        078              0.156875      14.745667       0.408381       0.178287       0.110000   -9999.000000       0.048900       0.205000
53954     53954     shanxi         110.9667       35.6167           98       164     2012      03        19        079              0.151875      12.926880       0.000000       0.176994       0.101000   -9999.000000       0.085700       0.306000
53954     53954     shanxi         110.9667       35.6167           98       164     2012      03        20        080              0.151875       7.155334       0.077973       0.180458       0.091500       0.164100       0.079000       0.189000
53954     53954     shanxi         110.9667       35.6167           98       164     2012      03        21        081              0.189167       9.484314       3.488860       0.179621   -9999.000000   -9999.000000       0.125100   -9999.000000
53954     53954     shanxi         110.9667       35.6167           98       164     2012      03        22        082              0.199125       4.470306       0.271597       0.224190   -9999.000000       0.314700   -9999.000000       0.760000
53954     53954     shanxi         110.9667       35.6167           98       164     2012      03        23        083              0.189208       7.529480       0.483192       0.224770   -9999.000000   -9999.000000       0.044700   -9999.000000
53954     53954     shanxi         110.9667       35.6167           98       164     2012      03        24        084              0.185125       9.698822       0.000000       0.215872   -9999.000000   -9999.000000   -9999.000000       0.276000
53954     53954     shanxi         110.9667       35.6167           98       164     2012      03        25        085              0.000000      12.978790       0.000000       0.199813       0.084000       0.284900       0.067600       0.165000
53954     53954     shanxi         110.9667       35.6167           98       164     2012      03        26        086              0.178292      14.655334       0.000000       0.187634       0.096000   -9999.000000       0.089200   -9999.000000
53954     53954     shanxi         110.9667       35.6167           98       164     2012      03        27        087              0.178000      15.360138       0.000000       0.180557       0.090000   -9999.000000   -9999.000000       0.241000
53954     53954     shanxi         110.9667       35.6167           98       164     2012      03        28        088              0.179542      17.974335       1.378714       0.174481   -9999.000000   -9999.000000       0.110100   -9999.000000
53954     53954     shanxi         110.9667       35.6167           98       164     2012      03        29        089              0.189125      16.335754       0.000000       0.186018       0.125000   -9999.000000       0.045700       0.428000
53954     53954     shanxi         110.9667       35.6167           98       164     2012      03        30        090              0.179917      17.196381       0.110108       0.190163       0.082000       0.141700       0.090800   -9999.000000
53954     53954     shanxi         110.9667       35.6167           98       164     2012      03        31        091              0.178750      12.893890       0.000000       0.181978       0.098000   -9999.000000       0.072900   -9999.000000
53954     53954     shanxi         110.9667       35.6167           98       164     2012      04        01        092              0.177083      16.816193       0.129726       0.173062       0.108000   -9999.000000       0.079800       0.263000
53954     53954     shanxi         110.9667       35.6167           98       164     2012      04        02        093              0.170125      19.042389       1.696172       0.169098       0.107000   -9999.000000   -9999.000000   -9999.000000
53954     53954     shanxi         110.9667       35.6167           98       164     2012      04        03        094              0.167750      13.710541       3.759536       0.188335       0.122000   -9999.000000       0.070600       0.243000
53954     53954     shanxi         110.9667       35.6167           98       164     2012      04        04        095              0.167750      15.906006       0.000000       0.180330       0.114500       0.073100       0.067800   -9999.000000
53954     53954     shanxi         110.9667       35.6167           98       164     2012      04        05        096              0.164333      19.409637       2.842004       0.170357       0.104000   -9999.000000       0.085300       0.152000
53954     53954     shanxi         110.9667       35.6167           98       164     2012      04        06        097              0.162217      18.868561       0.366647       0.165622       0.096000       0.088100       0.080700       0.207000
53954     53954     shanxi         110.9667       35.6167           98       164     2012      04        07        098              0.159625      19.772430       0.000000       0.163738       0.106000       0.122100       0.077100       0.290000
53954     53954     shanxi         110.9667       35.6167           98       164     2012      04        08        099              0.158500      20.972687       0.000000       0.162327       0.115000   -9999.000000   -9999.000000       0.202000
53954     53954     shanxi         110.9667       35.6167           98       164     2012      04        09        100              0.152958      22.994232       0.984546       0.161146       0.116000       0.072700       0.047200   -9999.000000
53954     53954     shanxi         110.9667       35.6167           98       164     2012      04        10        101              0.150000      19.905029       0.229336       0.166430       0.110500   -9999.000000       0.087400       0.331000
53954     53954     shanxi         110.9667       35.6167           98       164     2012      04        11        102              0.150250      19.878754       7.686702       0.175396       0.142000   -9999.000000       0.065100       0.174000
53954     53954     shanxi         110.9667       35.6167           98       164     2012      04        12        103              0.154917      19.861969       0.119560       0.199249       0.137000   -9999.000000       0.085700       0.328000
53954     53954     shanxi         110.9667       35.6167           98       164     2012      04        13        104              0.154708      14.646820       0.000000       0.243542       0.130000   -9999.000000   -9999.000000       0.127000
53954     53954     shanxi         110.9667       35.6167           98       164     2012      04        14        105              0.148833      18.720764       0.690875       0.212516       0.132000   -9999.000000       0.082700   -9999.000000
53954     53954     shanxi         110.9667       35.6167           98       164     2012      04        15        106              0.147583      17.714050       0.000000       0.203156       0.101000   -9999.000000       0.033300       0.120000
53954     53954     shanxi         110.9667       35.6167           98       164     2012      04        16        107              0.143375      21.023590       0.000000       0.188552       0.115500       0.255900       0.112000       0.091000
53954     53954     shanxi         110.9667       35.6167           98       164     2012      04        17        108              0.136500      21.834229       0.000000       0.178190       0.109000       0.066900       0.094000       0.145000
53954     53954     shanxi         110.9667       35.6167           98       164     2012      04        18        109              0.134292      20.104126       0.000000       0.175429   -9999.000000   -9999.000000   -9999.000000       0.137000
53954     53954     shanxi         110.9667       35.6167           98       164     2012      04        19        110              0.129458      23.186005       4.359817       0.170842       0.116000       0.257900   -9999.000000   -9999.000000
53954     53954     shanxi         110.9667       35.6167           98       164     2012      04        20        111              0.123292      23.767181       0.076598       0.189116       0.113000   -9999.000000       0.093800       0.240000
53954     53954     shanxi         110.9667       35.6167           98       164     2012      04        21        112              0.120583      19.396576       0.000000       0.215892       0.127000   -9999.000000       0.110800   -9999.000000
53954     53954     shanxi         110.9667       35.6167           98       164     2012      04        22        113              0.118292      23.034790       0.000000       0.192279       0.115000       0.074400   -9999.000000       0.166000
53954     53954     shanxi         110.9667       35.6167           98       164     2012      04        23        114              0.113333      26.332550       0.170801       0.176333       0.121000   -9999.000000       0.162400       0.096000
53954     53954     shanxi         110.9667       35.6167           98       164     2012      04        24        115              0.106583      25.966766       0.468457       0.171240       0.157000       0.117200       0.189800   -9999.000000
53954     53954     shanxi         110.9667       35.6167           98       164     2012      04        25        116              0.000000      18.522308       0.000000       0.175929       0.138000       0.092900   -9999.000000       0.145000
53954     53954     shanxi         110.9667       35.6167           98       164     2012      04        26        117              0.105958      20.682495       0.000000       0.166635       0.116500   -9999.000000       0.077700   -9999.000000
53954     53954     shanxi         110.9667       35.6167           98       164     2012      04        27        118              0.105750      23.669098       0.000000       0.163497       0.103000       0.131600   -9999.000000       0.283000
53954     53954     shanxi         110.9667       35.6167           98       164     2012      04        28        119              0.103208      26.149048       0.000000       0.161315       0.111000   -9999.000000       0.137500   -9999.000000
53954     53954     shanxi         110.9667       35.6167           98       164     2012      04        29        120              0.100833      26.648895       0.000000       0.160401       0.125000   -9999.000000       0.154800   -9999.000000
53954     53954     shanxi         110.9667       35.6167           98       164     2012      04        30        121              0.095417      26.508331       0.161959       0.159936       0.141000       0.135600   -9999.000000       0.397000
53954     53954     shanxi         110.9667       35.6167           98       164     2012      05        01        122              0.096500      22.148407       1.423185       0.163531       0.160500   -9999.000000       0.119900   -9999.000000
53954     53954     shanxi         110.9667       35.6167           98       164     2012      05        02        123              0.097333      23.404907       0.353031       0.164585       0.156500       0.163900       0.059000       0.256000
53954     53954     shanxi         110.9667       35.6167           98       164     2012      05        03        124              0.094458      26.534912       0.000000       0.160627       0.146000   -9999.000000       0.116100   -9999.000000
53954     53954     shanxi         110.9667       35.6167           98       164     2012      05        04        125              0.092792      26.015442       0.000000       0.158315   -9999.000000   -9999.000000       0.096700       0.135000
53954     53954     shanxi         110.9667       35.6167           98       164     2012      05        05        126              0.091458      27.925049       0.000000       0.156640       0.148000   -9999.000000       0.105000       0.184000
53954     53954     shanxi         110.9667       35.6167           98       164     2012      05        06        127              0.092083      28.803680       0.615304       0.155793       0.083000   -9999.000000   -9999.000000       0.260000
53954     53954     shanxi         110.9667       35.6167           98       164     2012      05        07        128              0.090000      30.176575       0.143410       0.156568   -9999.000000   -9999.000000       0.136800       0.256000
53954     53954     shanxi         110.9667       35.6167           98       164     2012      05        08        129              0.090917      27.532410       0.108082       0.159868       0.139000   -9999.000000       0.178900   -9999.000000
53954     53954     shanxi         110.9667       35.6167           98       164     2012      05        09        130              0.088500      30.790375       0.000000       0.155552   -9999.000000   -9999.000000       0.152200       0.294000
53954     53954     shanxi         110.9667       35.6167           98       164     2012      05        10        131              0.089083      28.618164       0.000000       0.155209       0.152000   -9999.000000       0.169800       0.264000
53954     53954     shanxi         110.9667       35.6167           98       164     2012      05        11        132              0.083750      30.649170       1.439989       0.153775       0.185000   -9999.000000   -9999.000000       0.268000
53954     53954     shanxi         110.9667       35.6167           98       164     2012      05        12        133              0.081417      23.891876       0.000000       0.168547       0.168000   -9999.000000   -9999.000000       0.147000
53954     53954     shanxi         110.9667       35.6167           98       164     2012      05        13        134              0.083375      21.260529       0.000000       0.165078       0.150000       0.083200       0.080100   -9999.000000
53954     53954     shanxi         110.9667       35.6167           98       164     2012      05        14        135              0.083500      24.175903       0.000000       0.155793       0.152000   -9999.000000       0.201000       0.111000
53954     53954     shanxi         110.9667       35.6167           98       164     2012      05        15        136              0.082542      25.894684       0.000000       0.152966       0.160000       0.238300       0.169100       0.241000
53954     53954     shanxi         110.9667       35.6167           98       164     2012      05        16        137              0.080708      26.328400       0.000000       0.151413       0.154000   -9999.000000       0.185700       0.229000
53954     53954     shanxi         110.9667       35.6167           98       164     2012      05        17        138              0.080375      26.774780       0.000000       0.150587       0.144500       0.277800   -9999.000000       0.245000
53954     53954     shanxi         110.9667       35.6167           98       164     2012      05        18        139              0.078833      28.317352       0.000000       0.149985       0.148000       0.246200       0.172900   -9999.000000
53954     53954     shanxi         110.9667       35.6167           98       164     2012      05        19        140              0.078958      28.488525       0.000000       0.150632       0.143000   -9999.000000       0.118400       0.189000
53954     53954     shanxi         110.9667       35.6167           98       164     2012      05        20        141              0.077667      31.374359       0.273063       0.150228   -9999.000000       0.109500       0.187600   -9999.000000
53954     53954     shanxi         110.9667       35.6167           98       164     2012      05        21        142              0.072292      30.276764       2.211784       0.150119   -9999.000000   -9999.000000       0.253000       0.391000
53954     53954     shanxi         110.9667       35.6167           98       164     2012      05        22        143              0.072583      22.469086       0.529796       0.165977       0.161000   -9999.000000       0.250900       0.152000
53954     53954     shanxi         110.9667       35.6167           98       164     2012      05        23        144              0.075208      22.854675       1.640632       0.183019   -9999.000000       0.137500   -9999.000000   -9999.000000
53954     53954     shanxi         110.9667       35.6167           98       164     2012      05        24        145              0.074833      24.453186       0.000000       0.179122       0.183000   -9999.000000       0.169500       0.311000
53954     53954     shanxi         110.9667       35.6167           98       164     2012      05        25        146              0.000000      23.348114       0.000000       0.176773   -9999.000000   -9999.000000       0.248600   -9999.000000
53954     53954     shanxi         110.9667       35.6167           98       164     2012      05        26        147              0.079458      26.150055       1.292176       0.163433       0.161000   -9999.000000       0.206600       0.394000
53954     53954     shanxi         110.9667       35.6167           98       164     2012      05        27        148              0.079500      29.427826       2.044278       0.156282       0.148000   -9999.000000       0.231800   -9999.000000
53954     53954     shanxi         110.9667       35.6167           98       164     2012      05        28        149              0.082667      31.638947      18.753754       0.153064       0.165000       0.309300   -9999.000000   -9999.000000
53954     53954     shanxi         110.9667       35.6167           98       164     2012      05        29        150              0.149958      27.740753       0.514828       0.204884       0.185000   -9999.000000   -9999.000000       0.495000
53954     53954     shanxi         110.9667       35.6167           98       164     2012      05        30        151              0.144500      25.741638       0.000000       0.274145       0.182000       0.163400       0.128000   -9999.000000
53954     53954     shanxi         110.9667       35.6167           98       164     2012      05        31        152              0.131208      26.525635       0.187401       0.229971       0.170000   -9999.000000       0.154800   -9999.000000
53954     53954     shanxi         110.9667       35.6167           98       164     2012      06        01        153              0.124083      24.752869       0.093168       0.210155       0.136000   -9999.000000       0.218100   -9999.000000
53954     53954     shanxi         110.9667       35.6167           98       164     2012      06        02        154              0.115417      27.739441       0.000000       0.192147       0.128000       0.232300       0.234200       0.388000
53954     53954     shanxi         110.9667       35.6167           98       164     2012      06        03        155              0.106333      29.568573       0.000000       0.178344       0.120000   -9999.000000   -9999.000000       0.390000
53954     53954     shanxi         110.9667       35.6167           98       164     2012      06        04        156              0.102167      29.111389       0.000000       0.172135       0.135000   -9999.000000       0.188500       0.352000
53954     53954     shanxi         110.9667       35.6167           98       164     2012      06        05        157              0.096542      31.010986       1.812887       0.167824   -9999.000000       0.294500       0.168500       0.369000
53954     53954     shanxi         110.9667       35.6167           98       164     2012      06        06        158              0.091500      27.758240       0.966114       0.182765       0.153000   -9999.000000       0.224100   -9999.000000
53954     53954     shanxi         110.9667       35.6167           98       164     2012      06        07        159              0.109625      24.987793       3.180362       0.183847       0.148500       0.168000       0.196800       0.320000
53954     53954     shanxi         110.9667       35.6167           98       164     2012      06        08        160              0.129667      28.984985       0.000000       0.199286       0.150500   -9999.000000       0.218000       0.353000
53954     53954     shanxi         110.9667       35.6167           98       164     2012      06        09        161              0.133958      27.936615       0.000000       0.188737       0.119000       0.069600   -9999.000000       0.346000
53954     53954     shanxi         110.9667       35.6167           98       164     2012      06        10        162              0.129583      31.962372       0.000000       0.169053       0.131000   -9999.000000       0.127300       0.275000
53954     53954     shanxi         110.9667       35.6167           98       164     2012      06        11        163              0.000000      30.968048       0.000000       0.161755       0.132000   -9999.000000       0.201200   -9999.000000
53954     53954     shanxi         110.9667       35.6167           98       164     2012      06        12        164              0.120042      31.871887       0.000000       0.158486       0.115500   -9999.000000       0.173400       0.276000
53954     53954     shanxi         110.9667       35.6167           98       164     2012      06        13        165              0.114375      33.501007       0.000000       0.156648       0.131500   -9999.000000       0.190000       0.357000
53954     53954     shanxi         110.9667       35.6167           98       164     2012      06        14        166              0.108750      34.324280       0.000000       0.155170       0.129000   -9999.000000   -9999.000000       0.336000
53954     53954     shanxi         110.9667       35.6167           98       164     2012      06        15        167              0.104000      31.424896       0.000000       0.154451   -9999.000000       0.169800       0.205100       0.337000
53954     53954     shanxi         110.9667       35.6167           98       164     2012      06        16        168              0.100208      31.911987       0.000000       0.153356       0.135000   -9999.000000       0.097100   -9999.000000
53954     53954     shanxi         110.9667       35.6167           98       164     2012      06        17        169              0.097333      33.420593       0.000000       0.152624       0.120000   -9999.000000       0.205200       0.281000
53954     53954     shanxi         110.9667       35.6167           98       164     2012      06        18        170              0.094417      34.379791       0.446754       0.152242       0.138000   -9999.000000       0.171400   -9999.000000
53954     53954     shanxi         110.9667       35.6167           98       164     2012      06        19        171              0.090625      34.768005       1.279560       0.151929       0.145000   -9999.000000       0.192600       0.534000
53954     53954     shanxi         110.9667       35.6167           98       164     2012      06        20        172              0.089625      32.437195       1.763288       0.163472       0.139000       0.266000   -9999.000000       0.291000
53954     53954     shanxi         110.9667       35.6167           98       164     2012      06        21        173              0.088500      32.194580       0.337220       0.158543       0.132000   -9999.000000       0.170700   -9999.000000
53954     53954     shanxi         110.9667       35.6167           98       164     2012      06        22        174              0.087458      33.523499       0.000000       0.153863       0.128000   -9999.000000       0.158200       0.319000
53954     53954     shanxi         110.9667       35.6167           98       164     2012      06        23        175              0.085875      35.639069       3.518479       0.151700       0.135000       0.203900       0.181400   -9999.000000
53954     53954     shanxi         110.9667       35.6167           98       164     2012      06        24        176              0.096625      35.574219       1.857975       0.162114       0.143000   -9999.000000       0.213000       0.462000
53954     53954     shanxi         110.9667       35.6167           98       164     2012      06        25        177              0.100292      30.207214       6.003306       0.207644   -9999.000000       0.166000       0.182300   -9999.000000
53954     53954     shanxi         110.9667       35.6167           98       164     2012      06        26        178              0.102500      26.648956       0.346461       0.240270       0.160000   -9999.000000   -9999.000000   -9999.000000
53954     53954     shanxi         110.9667       35.6167           98       164     2012      06        27        179              0.106625      26.464294       0.346272       0.215112       0.157000   -9999.000000       0.097900       0.458000
53954     53954     shanxi         110.9667       35.6167           98       164     2012      06        28        180              0.106375      26.574188       4.728548       0.192088       0.172000       0.162100       0.180300   -9999.000000
53954     53954     shanxi         110.9667       35.6167           98       164     2012      06        29        181              0.136375      25.801300       7.166213       0.191840       0.208000   -9999.000000       0.170300       0.911000
53954     53954     shanxi         110.9667       35.6167           98       164     2012      06        30        182              0.155083      25.368347       0.000000       0.282228       0.140000   -9999.000000       0.154400   -9999.000000
53954     53954     shanxi         110.9667       35.6167           98       164     2012      07        01        183              0.155417      29.196991       0.069953       0.234798       0.144000   -9999.000000   -9999.000000       0.487000
53954     53954     shanxi         110.9667       35.6167           98       164     2012      07        02        184              0.149792      31.618652       0.801168       0.201180       0.160000   -9999.000000       0.155100       0.424000
53954     53954     shanxi         110.9667       35.6167           98       164     2012      07        03        185              0.143083      30.537567       0.000000       0.190110       0.120000       0.154100       0.072800       0.437000
53954     53954     shanxi         110.9667       35.6167           98       164     2012      07        04        186              0.131583      32.015656       2.583118       0.177642       0.174000   -9999.000000       0.175800       0.545000
53954     53954     shanxi         110.9667       35.6167           98       164     2012      07        05        187              0.134792      27.492218       0.675377       0.201827       0.146000       0.090100       0.138200   -9999.000000
53954     53954     shanxi         110.9667       35.6167           98       164     2012      07        06        188              0.132667      31.401520       0.852448       0.183580   -9999.000000       0.156500       0.148600       0.375000
53954     53954     shanxi         110.9667       35.6167           98       164     2012      07        07        189              0.124792      31.689209       1.616718       0.173016   -9999.000000   -9999.000000   -9999.000000       0.549000
53954     53954     shanxi         110.9667       35.6167           98       164     2012      07        08        190              0.156708      29.202179      47.390282       0.193240       0.243000       0.217000       0.181600       0.491000
53954     53954     shanxi         110.9667       35.6167           98       164     2012      07        09        191              0.224125      26.750275       2.514817       0.299236       0.224000   -9999.000000       0.183000       1.000000
53954     53954     shanxi         110.9667       35.6167           98       164     2012      07        10        192              0.212833      25.800934       0.000000       0.332910       0.166000   -9999.000000       0.158000   -9999.000000
53954     53954     shanxi         110.9667       35.6167           98       164     2012      07        11        193              0.199292      30.243195       0.000000       0.297860       0.162000       0.275200       0.161100       0.726000
53954     53954     shanxi         110.9667       35.6167           98       164     2012      07        12        194              0.192792      30.504730       0.000000       0.274986       0.166000   -9999.000000       0.140900       0.579000
53954     53954     shanxi         110.9667       35.6167           98       164     2012      07        13        195              0.190250      31.505524      14.668630       0.248787       0.219000       0.213300   -9999.000000       0.530000
53954     53954     shanxi         110.9667       35.6167           98       164     2012      07        14        196              0.191792      27.792999       0.000000       0.312332       0.168500   -9999.000000       0.090800       0.588000
53954     53954     shanxi         110.9667       35.6167           98       164     2012      07        15        197              0.183708      27.824951       0.000000       0.288921       0.177500   -9999.000000       0.155400   -9999.000000
53954     53954     shanxi         110.9667       35.6167           98       164     2012      07        16        198              0.174417      28.255737       0.000000       0.265256       0.149000       0.240400       0.194800       0.452000
53954     53954     shanxi         110.9667       35.6167           98       164     2012      07        17        199              0.197250      28.000427       0.000000       0.247850   -9999.000000   -9999.000000       0.207900   -9999.000000
53954     53954     shanxi         110.9667       35.6167           98       164     2012      07        18        200              0.212000      28.754822       0.000000       0.229781       0.161000       0.162800   -9999.000000       0.534000
53954     53954     shanxi         110.9667       35.6167           98       164     2012      07        19        201              0.204417      29.727783       0.000000       0.214911       0.133000   -9999.000000       0.207000       0.380000
53954     53954     shanxi         110.9667       35.6167           98       164     2012      07        20        202              0.197522      31.464844       0.000000       0.201835       0.151000       0.140000       0.122200   -9999.000000
53954     53954     shanxi         110.9667       35.6167           98       164     2012      07        21        203              0.189957      32.382416      15.638586       0.193346       0.178000       0.059700       0.248100       0.880000
53954     53954     shanxi         110.9667       35.6167           98       164     2012      07        22        204              0.196083      29.309601       0.000000       0.276519       0.175000   -9999.000000       0.192200   -9999.000000
53954     53954     shanxi         110.9667       35.6167           98       164     2012      07        23        205              0.187875      29.418427       0.706642       0.268164   -9999.000000       0.163700       0.146000       0.573000
53954     53954     shanxi         110.9667       35.6167           98       164     2012      07        24        206              0.184750      28.275421       0.086256       0.248462       0.192000       0.172800   -9999.000000   -9999.000000
53954     53954     shanxi         110.9667       35.6167           98       164     2012      07        25        207              0.179708      29.951508       3.383866       0.231969       0.177000       0.265900       0.108100   -9999.000000
53954     53954     shanxi         110.9667       35.6167           98       164     2012      07        26        208              0.174167      32.095367       0.166470       0.213819       0.165000       0.135700       0.145900       0.565000
53954     53954     shanxi         110.9667       35.6167           98       164     2012      07        27        209              0.165583      33.900177       0.000000       0.197325       0.153000   -9999.000000       0.123900   -9999.000000
53954     53954     shanxi         110.9667       35.6167           98       164     2012      07        28        210              0.159667      34.534821       0.000000       0.186312       0.173000       0.124500       0.140600       0.570000
53954     53954     shanxi         110.9667       35.6167           98       164     2012      07        29        211              0.153083      36.596497       2.400564       0.179626       0.197000       0.152900   -9999.000000   -9999.000000
53954     53954     shanxi         110.9667       35.6167           98       164     2012      07        30        212              0.152125      33.901886      16.190643       0.199182       0.278000   -9999.000000   -9999.000000       0.462000
53954     53954     shanxi         110.9667       35.6167           98       164     2012      07        31        213              0.174083      31.204376       1.514155       0.254559       0.241000       0.195500       0.096000       0.684000
53954     53954     shanxi         110.9667       35.6167           98       164     2012      08        01        214              0.172792      27.509399       0.062691       0.287837       0.190000   -9999.000000       0.171900       0.712000
53954     53954     shanxi         110.9667       35.6167           98       164     2012      08        02        215              0.173542      26.429413       0.000000       0.264479   -9999.000000   -9999.000000       0.145100       0.612000
53954     53954     shanxi         110.9667       35.6167           98       164     2012      08        03        216              0.171000      29.279327       0.000000       0.245628       0.215000       0.065500       0.149500   -9999.000000
53954     53954     shanxi         110.9667       35.6167           98       164     2012      08        04        217              0.166292      30.061188      22.631079       0.224656       0.182500   -9999.000000   -9999.000000       0.574000
53954     53954     shanxi         110.9667       35.6167           98       164     2012      08        05        218              0.156958      31.761719       1.642627       0.205136       0.210000       0.282400       0.144400       0.664000
53954     53954     shanxi         110.9667       35.6167           98       164     2012      08        06        219              0.156583      28.992035       0.000000       0.211269       0.193000   -9999.000000       0.136800       0.601000
53954     53954     shanxi         110.9667       35.6167           98       164     2012      08        07        220              0.153625      30.938324       0.000000       0.199158       0.176000       0.189000       0.154900       0.470000
53954     53954     shanxi         110.9667       35.6167           98       164     2012      08        08        221              0.148917      33.265076       0.591494       0.187487       0.213000       0.211200       0.165300   -9999.000000
53954     53954     shanxi         110.9667       35.6167           98       164     2012      08        09        222              0.143792      32.449463       3.655693       0.185691       0.222000   -9999.000000       0.195300       0.540000
53954     53954     shanxi         110.9667       35.6167           98       164     2012      08        10        223              0.147750      27.584717       0.000000       0.226455       0.179000       0.112100   -9999.000000       0.562000
53954     53954     shanxi         110.9667       35.6167           98       164     2012      08        11        224              0.145792      30.789093       0.110834       0.198062       0.192500   -9999.000000       0.123400       0.497000
53954     53954     shanxi         110.9667       35.6167           98       164     2012      08        12        225              0.140708      32.401154       0.278746       0.183933       0.187000       0.442400       0.180800       0.450000
53954     53954     shanxi         110.9667       35.6167           98       164     2012      08        13        226              0.135167      30.265167       1.787533       0.179988   -9999.000000       0.221600       0.127100   -9999.000000
53954     53954     shanxi         110.9667       35.6167           98       164     2012      08        14        227              0.156958      25.680969      12.422287       0.193463       0.238000   -9999.000000       0.155500       0.761000
53954     53954     shanxi         110.9667       35.6167           98       164     2012      08        15        228              0.174333      24.578217       0.000000       0.291132       0.176000       0.142200   -9999.000000   -9999.000000
53954     53954     shanxi         110.9667       35.6167           98       164     2012      08        16        229              0.172833      27.712341       0.000000       0.250141       0.191000       0.039300       0.136400       0.626000
53954     53954     shanxi         110.9667       35.6167           98       164     2012      08        17        230              0.170917      28.478973      58.396091       0.222721       0.180000   -9999.000000       0.097000       0.417000
53954     53954     shanxi         110.9667       35.6167           98       164     2012      08        18        231              0.267000      28.471466      16.676680       0.270686   -9999.000000       0.481400       0.157300   -9999.000000
53954     53954     shanxi         110.9667       35.6167           98       164     2012      08        19        232              0.266875      24.427185       3.054680       0.369091       0.234000   -9999.000000       0.146000       0.878000
53954     53954     shanxi         110.9667       35.6167           98       164     2012      08        20        233              0.257875      23.865601       0.181239       0.343163       0.254000   -9999.000000       0.249300   -9999.000000
53954     53954     shanxi         110.9667       35.6167           98       164     2012      08        21        234              0.242917      24.663269       0.000000       0.328522       0.177500       0.315400   -9999.000000       0.720000
53954     53954     shanxi         110.9667       35.6167           98       164     2012      08        22        235              0.225667      24.192139       0.000000       0.310593       0.182500   -9999.000000       0.196500   -9999.000000
53954     53954     shanxi         110.9667       35.6167           98       164     2012      08        23        236              0.208417      24.385590       0.000000       0.297233       0.148000       0.257800       0.175000   -9999.000000
53954     53954     shanxi         110.9667       35.6167           98       164     2012      08        24        237              0.195167      23.255554       0.000000       0.283445   -9999.000000   -9999.000000       0.232300       0.551000
53954     53954     shanxi         110.9667       35.6167           98       164     2012      08        25        238              0.000000      24.834564       0.000000       0.272722       0.193000       0.158700       0.215700   -9999.000000
53954     53954     shanxi         110.9667       35.6167           98       164     2012      08        26        239              0.179542      24.605988       0.000000       0.266606       0.152500       0.151100       0.212700       0.556000
53954     53954     shanxi         110.9667       35.6167           98       164     2012      08        27        240              0.174125      25.858948       2.294857       0.259817       0.178500   -9999.000000   -9999.000000   -9999.000000
53954     53954     shanxi         110.9667       35.6167           98       164     2012      08        28        241              0.168333      26.896149       0.175817       0.249795       0.152000       0.117100       0.155800       0.473000
53954     53954     shanxi         110.9667       35.6167           98       164     2012      08        29        242              0.165250      28.208832       0.000000       0.239225       0.178000   -9999.000000       0.257900       0.565000
53954     53954     shanxi         110.9667       35.6167           98       164     2012      08        30        243              0.162875      29.346222       0.410677       0.225832       0.166000   -9999.000000       0.217600       0.537000
53954     53954     shanxi         110.9667       35.6167           98       164     2012      08        31        244              0.162292      28.850555      22.345076       0.217021       0.233000       0.141600       0.328700       0.916000
53954     53954     shanxi         110.9667       35.6167           98       164     2012      09        01        245              0.226625      22.875580      27.413147       0.327634       0.252000   -9999.000000   -9999.000000   -9999.000000
53954     53954     shanxi         110.9667       35.6167           98       164     2012      09        02        246              0.240250      21.223724       0.000000       0.364807       0.188000       0.372300       0.287700       0.780000
53954     53954     shanxi         110.9667       35.6167           98       164     2012      09        03        247              0.222958      22.330048       0.000000       0.331030       0.178000       0.198800       0.173100       0.701000
53954     53954     shanxi         110.9667       35.6167           98       164     2012      09        04        248              0.209625      23.681152       0.000000       0.313304       0.205000       0.359800       0.326400       0.642000
53954     53954     shanxi         110.9667       35.6167           98       164     2012      09        05        249              0.198708      23.939178       0.106843       0.301127       0.202000       0.080200       0.272900       0.481000
53954     53954     shanxi         110.9667       35.6167           98       164     2012      09        06        250              0.189792      24.719879       4.919873       0.292531       0.200500   -9999.000000       0.344500   -9999.000000
53954     53954     shanxi         110.9667       35.6167           98       164     2012      09        07        251              0.189000      22.140350       1.370149       0.306955       0.198000       0.122800   -9999.000000       0.608000
53954     53954     shanxi         110.9667       35.6167           98       164     2012      09        08        252              0.185250      24.445618       0.000000       0.300505       0.183000       0.199400       0.269100       0.570000
53954     53954     shanxi         110.9667       35.6167           98       164     2012      09        09        253              0.177042      24.519165       0.273734       0.291863   -9999.000000   -9999.000000       0.303500       0.615000
53954     53954     shanxi         110.9667       35.6167           98       164     2012      09        10        254              0.200958      24.854614      29.618952       0.277496       0.268000       0.055200       0.242400       0.990000
53954     53954     shanxi         110.9667       35.6167           98       164     2012      09        11        255              0.243833      20.720276       0.852457       0.350110       0.191500   -9999.000000       0.312000   -9999.000000
53954     53954     shanxi         110.9667       35.6167           98       164     2012      09        12        256              0.227625      22.663635       0.000000       0.337684       0.194500   -9999.000000       0.280000       0.621000
53954     53954     shanxi         110.9667       35.6167           98       164     2012      09        13        257              0.214000      18.522369       0.000000       0.319242       0.159000       0.206700   -9999.000000   -9999.000000
53954     53954     shanxi         110.9667       35.6167           98       164     2012      09        14        258              0.204208      19.651306       0.000000       0.307631       0.164000   -9999.000000       0.136400       0.587000
53954     53954     shanxi         110.9667       35.6167           98       164     2012      09        15        259              0.194667      20.892273       0.000000       0.299038       0.184000       0.130100       0.265500       0.379000
53954     53954     shanxi         110.9667       35.6167           98       164     2012      09        16        260              0.185625      21.040039       0.000000       0.290638       0.186000   -9999.000000       0.217700   -9999.000000
53954     53954     shanxi         110.9667       35.6167           98       164     2012      09        17        261              0.178500      20.717987       1.373390       0.284551       0.146000   -9999.000000       0.209200       0.531000
53954     53954     shanxi         110.9667       35.6167           98       164     2012      09        18        262              0.172583      21.290161       0.798342       0.284379       0.185500       0.113000   -9999.000000   -9999.000000
53954     53954     shanxi         110.9667       35.6167           98       164     2012      09        19        263              0.165708      22.209045       0.000000       0.285548       0.152000   -9999.000000       0.214400       0.566000
53954     53954     shanxi         110.9667       35.6167           98       164     2012      09        20        264              0.161708      22.970795       2.794206       0.274800       0.217000       0.042000       0.160200   -9999.000000
53954     53954     shanxi         110.9667       35.6167           98       164     2012      09        21        265              0.161417      21.093414       0.829764       0.279437   -9999.000000       0.030400       0.235200   -9999.000000
53954     53954     shanxi         110.9667       35.6167           98       164     2012      09        22        266              0.160625      20.680573       0.000000       0.291012       0.135500       0.238400       0.191800       0.642000
53954     53954     shanxi         110.9667       35.6167           98       164     2012      09        23        267              0.159000      22.173737       0.000000       0.278790       0.153500       0.092700       0.211800   -9999.000000
53954     53954     shanxi         110.9667       35.6167           98       164     2012      09        24        268              0.156833      22.745056       0.000000       0.269742       0.143000   -9999.000000   -9999.000000       0.602000
53954     53954     shanxi         110.9667       35.6167           98       164     2012      09        25        269              0.156000      22.472992       4.557704       0.261238       0.189000   -9999.000000       0.222100   -9999.000000
53954     53954     shanxi         110.9667       35.6167           98       164     2012      09        26        270              0.155625      20.506500       1.378251       0.283605       0.168000       0.167300       0.286600       0.664000
53954     53954     shanxi         110.9667       35.6167           98       164     2012      09        27        271              0.156071      19.188721       0.000000       0.281875       0.148500   -9999.000000       0.219100       0.551000
53954     53954     shanxi         110.9667       35.6167           98       164     2012      09        28        272              0.147933      19.392059       0.000000       0.268405       0.148000   -9999.000000       0.256400       0.482000
53954     53954     shanxi         110.9667       35.6167           98       164     2012      09        29        273              0.146833      17.593262       0.000000       0.257544       0.139000   -9999.000000   -9999.000000       0.489000
53954     53954     shanxi         110.9667       35.6167           98       164     2012      09        30        274              0.145833      18.319794       0.000000       0.250503       0.133000   -9999.000000   -9999.000000   -9999.000000
53954     53954     shanxi         110.9667       35.6167           98       164     2012      10        01        275              0.145375      18.616882       0.000000       0.243715       0.131000       0.038600       0.066000       0.494000
53954     53954     shanxi         110.9667       35.6167           98       164     2012      10        02        276              0.146125      19.959808       0.842657       0.237425       0.127000   -9999.000000       0.174000       0.556000
53954     53954     shanxi         110.9667       35.6167           98       164     2012      10        03        277              0.146250      20.788788       3.438916       0.232891       0.117000       0.187300       0.142800       0.544000
53954     53954     shanxi         110.9667       35.6167           98       164     2012      10        04        278              0.144958      21.483856       0.787972       0.228507       0.161500   -9999.000000       0.180700       0.516000
53954     53954     shanxi         110.9667       35.6167           98       164     2012      10        05        279              0.143375      20.310333       0.323605       0.230521       0.128000       0.362200   -9999.000000   -9999.000000
53954     53954     shanxi         110.9667       35.6167           98       164     2012      10        06        280              0.142875      19.626007       0.461162       0.226922   -9999.000000       0.208200       0.148400       0.404000
53954     53954     shanxi         110.9667       35.6167           98       164     2012      10        07        281              0.142333      19.850311       0.000000       0.219536       0.140000   -9999.000000       0.103900       0.451000
53954     53954     shanxi         110.9667       35.6167           98       164     2012      10        08        282              0.141667      17.985748       0.087117       0.218541       0.126500   -9999.000000       0.219800       0.465000
53954     53954     shanxi         110.9667       35.6167           98       164     2012      10        09        283              0.139667      19.165375       0.000000       0.217007       0.124000       0.035300       0.183600       0.343000
53954     53954     shanxi         110.9667       35.6167           98       164     2012      10        10        284              0.136958      18.745026       0.000000       0.210578       0.112000   -9999.000000       0.207900   -9999.000000
53954     53954     shanxi         110.9667       35.6167           98       164     2012      10        11        285              0.137375      18.889618       0.148328       0.205586       0.112000       0.119300   -9999.000000       0.377000
53954     53954     shanxi         110.9667       35.6167           98       164     2012      10        12        286              0.136167      20.305420       0.000000       0.204292       0.117000   -9999.000000       0.126800   -9999.000000
53954     53954     shanxi         110.9667       35.6167           98       164     2012      10        13        287              0.135542      19.686737       0.000000       0.204038       0.117000   -9999.000000       0.218600       0.436000
53954     53954     shanxi         110.9667       35.6167           98       164     2012      10        14        288              0.135292      20.165558       0.258998       0.201232       0.107500       0.204600       0.175900       0.340000
53954     53954     shanxi         110.9667       35.6167           98       164     2012      10        15        289              0.134958      18.853363       5.128597       0.198574       0.130500   -9999.000000       0.217400   -9999.000000
53954     53954     shanxi         110.9667       35.6167           98       164     2012      10        16        290              0.130542      17.180115       1.060847       0.215079       0.117000       0.329300   -9999.000000       0.366000
53954     53954     shanxi         110.9667       35.6167           98       164     2012      10        17        291              0.126333      13.880096       0.124752       0.250837   -9999.000000   -9999.000000   -9999.000000   -9999.000000
53954     53954     shanxi         110.9667       35.6167           98       164     2012      10        18        292              0.125875      14.062042       0.921329       0.233062       0.122000       0.271500       0.108700       0.649000
53954     53954     shanxi         110.9667       35.6167           98       164     2012      10        19        293              0.130208      14.364502       0.512857       0.233365       0.107500       0.109800       0.232400   -9999.000000
53954     53954     shanxi         110.9667       35.6167           98       164     2012      10        20        294              0.133833      16.290222       0.000000       0.228091       0.122000   -9999.000000       0.195900   -9999.000000
53954     53954     shanxi         110.9667       35.6167           98       164     2012      10        21        295              0.128375      18.099182       5.289093       0.220552       0.163000       0.048700       0.286600       0.690000
53954     53954     shanxi         110.9667       35.6167           98       164     2012      10        22        296              0.126750      12.521332       0.568544       0.259975   -9999.000000   -9999.000000   -9999.000000   -9999.000000
53954     53954     shanxi         110.9667       35.6167           98       164     2012      10        23        297              0.121917      12.580536       0.157996       0.252408   -9999.000000   -9999.000000       0.188200       0.465000
53954     53954     shanxi         110.9667       35.6167           98       164     2012      10        24        298              0.124375      10.052277       5.150842       0.246143   -9999.000000       0.382600       0.161900   -9999.000000
53954     53954     shanxi         110.9667       35.6167           98       164     2012      10        25        299              0.000000      12.431763       0.000000       0.240532       0.139500   -9999.000000       0.218300       0.353000
53954     53954     shanxi         110.9667       35.6167           98       164     2012      10        26        300              0.127875      14.028290       0.000000       0.234920       0.132000       0.063700       0.215100       0.288000
53954     53954     shanxi         110.9667       35.6167           98       164     2012      10        27        301              0.128583      13.604645       0.000000       0.232001       0.126000       0.140000       0.208000       0.351000
53954     53954     shanxi         110.9667       35.6167           98       164     2012      10        28        302              0.000000      15.286346       1.039265       0.226846   -9999.000000   -9999.000000   -9999.000000       0.552000
53954     53954     shanxi         110.9667       35.6167           98       164     2012      10        29        303              0.127375      14.794647       0.000000       0.229487       0.152000   -9999.000000       0.089300   -9999.000000
53954     53954     shanxi         110.9667       35.6167           98       164     2012      10        30        304              0.124708      13.907867       0.000000       0.232912       0.109000   -9999.000000       0.195700       0.255000
53954     53954     shanxi         110.9667       35.6167           98       164     2012      10        31        305              0.123750      11.714905       0.000000       0.222875       0.141000   -9999.000000       0.157500       0.295000
53954     53954     shanxi         110.9667       35.6167           98       164     2012      11        01        306              0.123625      11.757996       0.000000       0.216879       0.120000       0.196100       0.192800       0.350000
53954     53954     shanxi         110.9667       35.6167           98       164     2012      11        02        307              0.125417      12.371307       2.173514       0.213375   -9999.000000   -9999.000000   -9999.000000       0.315000
53954     53954     shanxi         110.9667       35.6167           98       164     2012      11        03        308              0.119708      14.050842       1.574077       0.216733   -9999.000000       0.234900       0.202900   -9999.000000
53954     53954     shanxi         110.9667       35.6167           98       164     2012      11        04        309              0.117125       7.131439       2.232192       0.234644       0.126000   -9999.000000       0.081900       0.222000
53954     53954     shanxi         110.9667       35.6167           98       164     2012      11        05        310              0.117375       5.892334       0.000000       0.223162       0.127000   -9999.000000       0.184700       0.169000
53954     53954     shanxi         110.9667       35.6167           98       164     2012      11        06        311              0.119375       7.048737       0.145616       0.219627       0.131000       0.103200       0.155700       0.317000
53954     53954     shanxi         110.9667       35.6167           98       164     2012      11        07        312              0.119375       8.975403       0.127959       0.218140       0.143000   -9999.000000       0.181800       0.215000
53954     53954     shanxi         110.9667       35.6167           98       164     2012      11        08        313              0.121625       8.215088       0.000000       0.218534       0.155000       0.176000   -9999.000000   -9999.000000
53954     53954     shanxi         110.9667       35.6167           98       164     2012      11        09        314              0.120375      10.258698       0.134745       0.215463       0.186000   -9999.000000       0.168900       0.168000
53954     53954     shanxi         110.9667       35.6167           98       164     2012      11        10        315              0.117167       8.143799       0.099272       0.215642   -9999.000000   -9999.000000       0.180400   -9999.000000
53954     53954     shanxi         110.9667       35.6167           98       164     2012      11        11        316              0.115875       5.659790       0.000000       0.214742       0.142000   -9999.000000       0.147700       0.330000
53954     53954     shanxi         110.9667       35.6167           98       164     2012      11        12        317              0.115958       5.884949       0.000000       0.210830       0.134000   -9999.000000       0.157100       0.216000
53954     53954     shanxi         110.9667       35.6167           98       164     2012      11        13        318              0.000000       7.115387       0.000000       0.209713   -9999.000000       0.058100   -9999.000000   -9999.000000
53954     53954     shanxi         110.9667       35.6167           98       164     2012      11        14        319              0.117167       7.817352       0.000000       0.207428       0.140000   -9999.000000   -9999.000000       0.246000
53954     53954     shanxi         110.9667       35.6167           98       164     2012      11        15        320              0.116333       8.131195       0.275627       0.205707   -9999.000000   -9999.000000       0.061100   -9999.000000
53954     53954     shanxi         110.9667       35.6167           98       164     2012      11        16        321              0.115250       5.524841       0.000000       0.209576       0.154000       0.372400       0.164700       0.379000
53954     53954     shanxi         110.9667       35.6167           98       164     2012      11        17        322              0.000000       6.526855       3.754000       0.210252       0.128000   -9999.000000       0.136000   -9999.000000
53954     53954     shanxi         110.9667       35.6167           98       164     2012      11        18        323              0.116917       7.693939       0.000000       0.208758       0.144000   -9999.000000       0.158100   -9999.000000
53954     53954     shanxi         110.9667       35.6167           98       164     2012      11        19        324              0.119500       8.303619       0.344519       0.206503       0.144000       0.271000   -9999.000000       0.245000
53954     53954     shanxi         110.9667       35.6167           98       164     2012      11        20        325              0.120667       8.551788       0.000000       0.204298       0.135500       0.173200       0.143000   -9999.000000
53954     53954     shanxi         110.9667       35.6167           98       164     2012      11        21        326              0.119625       7.489166       0.000000       0.205240       0.102000       0.062600       0.074300       0.341000
53954     53954     shanxi         110.9667       35.6167           98       164     2012      11        22        327              0.118000       8.560120       0.000000       0.205224   -9999.000000   -9999.000000       0.140100   -9999.000000
53954     53954     shanxi         110.9667       35.6167           98       164     2012      11        23        328              0.116208       6.107605       0.000000       0.203129       0.113000       0.175400       0.115600       0.059000
53954     53954     shanxi         110.9667       35.6167           98       164     2012      11        24        329              0.116750       5.337250       0.322990       0.199117       0.123000       0.076300       0.140800       0.262000
53954     53954     shanxi         110.9667       35.6167           98       164     2012      11        25        330              0.114458       6.337250       0.088657       0.200486   -9999.000000   -9999.000000   -9999.000000       0.227000
53954     53954     shanxi         110.9667       35.6167           98       164     2012      11        26        331              0.112000       4.339935       0.000000       0.197964       0.092000       0.062100   -9999.000000       0.332000
53954     53954     shanxi         110.9667       35.6167           98       164     2012      11        27        332              0.112333       4.219513       0.000000       0.194287       0.112000   -9999.000000       0.104900   -9999.000000
53954     53954     shanxi         110.9667       35.6167           98       164     2012      11        28        333              0.110292       5.166534       0.530753       0.196162   -9999.000000       0.128700       0.083800       0.114000
53954     53954     shanxi         110.9667       35.6167           98       164     2012      11        29        334              0.108208       2.704834       0.000000       0.189747   -9999.000000       0.088700       0.104700       0.058000
53954     53954     shanxi         110.9667       35.6167           98       164     2012      11        30        335              0.109958       2.133392       0.113460       0.186921   -9999.000000   -9999.000000   -9999.000000       0.171000
53954     53954     shanxi         110.9667       35.6167           98       164     2012      12        01        336              0.110000       3.329773       0.253547       0.191736   -9999.000000       0.109200   -9999.000000       0.476000
53954     53954     shanxi         110.9667       35.6167           98       164     2012      12        02        337              0.110833       1.534546       0.000000       0.190489   -9999.000000   -9999.000000       0.019900   -9999.000000
53954     53954     shanxi         110.9667       35.6167           98       164     2012      12        03        338              0.109625       2.804657       0.000000       0.195381       0.124000   -9999.000000       0.111100       0.158000
53954     53954     shanxi         110.9667       35.6167           98       164     2012      12        04        339              0.110125       2.951355       0.000000       0.192689       0.124000       0.058700       0.094100       0.175000
53954     53954     shanxi         110.9667       35.6167           98       164     2012      12        05        340              0.110917       3.861572       0.000000       0.195326   -9999.000000   -9999.000000       0.112300       0.175000
53954     53954     shanxi         110.9667       35.6167           98       164     2012      12        06        341              0.112250       2.511688       0.000000       0.188384   -9999.000000       0.120000   -9999.000000       0.205000
53954     53954     shanxi         110.9667       35.6167           98       164     2012      12        07        342              0.111875       3.927582       0.000000       0.192103       0.102000       0.144900       0.088300   -9999.000000
53954     53954     shanxi         110.9667       35.6167           98       164     2012      12        08        343              0.109125       3.524567       0.000000       0.188933   -9999.000000   -9999.000000       0.066000       0.015000
53954     53954     shanxi         110.9667       35.6167           98       164     2012      12        09        344              0.106750       1.624268       0.000000       0.182126       0.108000       0.033700       0.110400   -9999.000000
53954     53954     shanxi         110.9667       35.6167           98       164     2012      12        10        345              0.106292       1.363312       0.000000       0.181129   -9999.000000   -9999.000000       0.096400       0.100000
53954     53954     shanxi         110.9667       35.6167           98       164     2012      12        11        346              0.106750       1.673492       0.000000       0.182222   -9999.000000   -9999.000000       0.095200       0.096000
53954     53954     shanxi         110.9667       35.6167           98       164     2012      12        12        347              0.108000       0.757477       0.000000       0.180241   -9999.000000       0.040200   -9999.000000   -9999.000000
53954     53954     shanxi         110.9667       35.6167           98       164     2012      12        13        348              0.108000       1.374786       0.571262       0.182638   -9999.000000       0.153600       0.035900       0.095000
53954     53954     shanxi         110.9667       35.6167           98       164     2012      12        14        349              0.108167       0.645721       0.000000       0.183865   -9999.000000   -9999.000000       0.097600   -9999.000000
53954     53954     shanxi         110.9667       35.6167           98       164     2012      12        15        350              0.000000       1.382080       0.000000       0.187783   -9999.000000   -9999.000000       0.096100       0.480000
53954     53954     shanxi         110.9667       35.6167           98       164     2012      12        16        351              0.110000       1.305511       0.000000       0.190511   -9999.000000   -9999.000000       0.113500   -9999.000000
53954     53954     shanxi         110.9667       35.6167           98       164     2012      12        17        352              0.109417       1.407196       0.000000       0.192905   -9999.000000       0.071700   -9999.000000   -9999.000000
53954     53954     shanxi         110.9667       35.6167           98       164     2012      12        18        353              0.108833       1.706879       0.000000       0.192863       0.096000       0.078000       0.097900       0.144000
53954     53954     shanxi         110.9667       35.6167           98       164     2012      12        19        354              0.108583       1.933075       0.000000       0.190879   -9999.000000       0.097300       0.027300   -9999.000000
53954     53954     shanxi         110.9667       35.6167           98       164     2012      12        20        355              0.000000       0.631226       0.166831       0.187873   -9999.000000   -9999.000000       0.095300       0.327000
53954     53954     shanxi         110.9667       35.6167           98       164     2012      12        21        356              0.107292      -0.942291       0.000000       0.180581   -9999.000000   -9999.000000       0.087000   -9999.000000
53954     53954     shanxi         110.9667       35.6167           98       164     2012      12        22        357              0.104167      -0.646454       0.000000       0.180790   -9999.000000       0.125200       0.094500       0.060000
53954     53954     shanxi         110.9667       35.6167           98       164     2012      12        23        358              0.094833      -2.719971       0.000000       0.171674   -9999.000000   -9999.000000   -9999.000000       0.010000
53954     53954     shanxi         110.9667       35.6167           98       164     2012      12        24        359              0.090500      -4.631195       0.000000       0.160842   -9999.000000   -9999.000000       0.069000       0.032000
53954     53954     shanxi         110.9667       35.6167           98       164     2012      12        25        360              0.091667      -2.563782       0.000000       0.170063   -9999.000000       0.087200       0.071400       0.081000
53954     53954     shanxi         110.9667       35.6167           98       164     2012      12        26        361              0.000000      -2.078491       0.000000       0.171979   -9999.000000       0.223900       0.077000   -9999.000000
53954     53954     shanxi         110.9667       35.6167           98       164     2012      12        27        362              0.100100      -1.829498       0.000000       0.173170   -9999.000000       0.040100       0.090800       0.069000
53954     53954     shanxi         110.9667       35.6167           98       164     2012      12        28        363              0.098000      -1.371674       0.000000       0.175203   -9999.000000   -9999.000000       0.093200       0.123000
53954     53954     shanxi         110.9667       35.6167           98       164     2012      12        29        364              0.000000      -1.434723       0.000000       0.175713   -9999.000000       0.244600   -9999.000000       0.021000
53954     53954     shanxi         110.9667       35.6167           98       164     2012      12        30        365              0.000000      -3.494965       0.000000       0.165864   -9999.000000       0.036800       0.014600       0.156000
53954     53954     shanxi         110.9667       35.6167           98       164     2012      12        31        366              0.097133      -2.816711       0.000000       0.167569   -9999.000000       0.144600       0.082800   -9999.000000
