# Supplementary material for: Research on Fusing Multisatellite Soil Moisture Data Based on Bayesian Model Averaging
Source: Hindawi journal article supplement (doi:10.1155/2018/9310838), 2018-06-25
Supplement: f1 [file 9310838.f1.zip › 2012_sm00-10cm_daily_ZDB_ZHY_53956_366days_allin.txt]

53956     53956     shanxi         110.8333       35.4000           98       163     2012      01        01        001              0.000000   -9999.000000       0.000000   -9999.000000   -9999.000000   -9999.000000       0.057100   -9999.000000
53956     53956     shanxi         110.8333       35.4000           98       163     2012      01        02        002              0.107417      -0.069366       0.000000       0.192699   -9999.000000       0.074200   -9999.000000       0.280000
53956     53956     shanxi         110.8333       35.4000           98       163     2012      01        03        003              0.000000       0.677490       0.000000       0.196278   -9999.000000   -9999.000000   -9999.000000   -9999.000000
53956     53956     shanxi         110.8333       35.4000           98       163     2012      01        04        004              0.094292      -1.043304      27.879469       0.188513   -9999.000000   -9999.000000       0.014700       0.084000
53956     53956     shanxi         110.8333       35.4000           98       163     2012      01        05        005              0.091542      -1.330872       0.000000       0.185115   -9999.000000   -9999.000000       0.054000       0.216000
53956     53956     shanxi         110.8333       35.4000           98       163     2012      01        06        006              0.092917      -1.554962       0.000000       0.183598   -9999.000000   -9999.000000       0.050900   -9999.000000
53956     53956     shanxi         110.8333       35.4000           98       163     2012      01        07        007              0.098042      -0.023529       0.000000       0.190558   -9999.000000   -9999.000000       0.057300       0.154000
53956     53956     shanxi         110.8333       35.4000           98       163     2012      01        08        008              0.000000       0.214752       0.000000       0.193269       0.103000   -9999.000000   -9999.000000   -9999.000000
53956     53956     shanxi         110.8333       35.4000           98       163     2012      01        09        009              0.099833       1.306000       0.000000       0.196553   -9999.000000   -9999.000000   -9999.000000       0.051000
53956     53956     shanxi         110.8333       35.4000           98       163     2012      01        10        010              0.099957       1.508514       0.000000       0.197326   -9999.000000       0.066500       0.016400       0.283000
53956     53956     shanxi         110.8333       35.4000           98       163     2012      01        11        011              0.096917       1.389282       0.000000       0.196552   -9999.000000   -9999.000000       0.044000       0.122000
53956     53956     shanxi         110.8333       35.4000           98       163     2012      01        12        012              0.096583       1.310638       0.000000       0.194968   -9999.000000   -9999.000000       0.045500       0.225000
53956     53956     shanxi         110.8333       35.4000           98       163     2012      01        13        013              0.098417       1.430267       0.000000       0.195341       0.107000   -9999.000000       0.050200   -9999.000000
53956     53956     shanxi         110.8333       35.4000           98       163     2012      01        14        014              0.099542       1.969391       0.000000       0.196910   -9999.000000   -9999.000000   -9999.000000       0.073000
53956     53956     shanxi         110.8333       35.4000           98       163     2012      01        15        015              0.096375       1.226654       0.000000       0.194291   -9999.000000   -9999.000000       0.035400       0.267000
53956     53956     shanxi         110.8333       35.4000           98       163     2012      01        16        016              0.099333       1.703156       0.000000       0.195857   -9999.000000   -9999.000000       0.039000       0.159000
53956     53956     shanxi         110.8333       35.4000           98       163     2012      01        17        017              0.000000       1.623871       0.461312       0.197220   -9999.000000   -9999.000000       0.040000       0.177000
53956     53956     shanxi         110.8333       35.4000           98       163     2012      01        18        018              0.100083       1.386078       0.000000       0.198530       0.105000       0.063200       0.042500   -9999.000000
53956     53956     shanxi         110.8333       35.4000           98       163     2012      01        19        019              0.102167       1.833344       0.754861       0.199529   -9999.000000   -9999.000000   -9999.000000       0.163000
53956     53956     shanxi         110.8333       35.4000           98       163     2012      01        20        020              0.104750       1.758881       0.892303       0.202333   -9999.000000   -9999.000000   -9999.000000       0.495000
53956     53956     shanxi         110.8333       35.4000           98       163     2012      01        21        021              0.099250       1.277161       0.000000       0.202510   -9999.000000   -9999.000000       0.010000       0.327000
53956     53956     shanxi         110.8333       35.4000           98       163     2012      01        22        022              0.093875      -0.762512       0.000000       0.191826   -9999.000000       0.083600       0.036000       0.084000
53956     53956     shanxi         110.8333       35.4000           98       163     2012      01        23        023              0.088500      -1.610687       0.000000       0.184614   -9999.000000   -9999.000000       0.041300   -9999.000000
53956     53956     shanxi         110.8333       35.4000           98       163     2012      01        24        024              0.087125      -1.934204       0.000000       0.181762   -9999.000000   -9999.000000   -9999.000000       0.123000
53956     53956     shanxi         110.8333       35.4000           98       163     2012      01        25        025              0.087000      -1.878418       0.000000       0.181658   -9999.000000   -9999.000000   -9999.000000   -9999.000000
53956     53956     shanxi         110.8333       35.4000           98       163     2012      01        26        026              0.088542      -0.978973       0.153658       0.184440   -9999.000000   -9999.000000       0.041300       0.184000
53956     53956     shanxi         110.8333       35.4000           98       163     2012      01        27        027              0.090500       0.349701       0.601383       0.189582       0.101000   -9999.000000       0.020700       0.072000
53956     53956     shanxi         110.8333       35.4000           98       163     2012      01        28        028              0.093708       1.190887       0.000000       0.193165       0.120000       0.032200       0.046600   -9999.000000
53956     53956     shanxi         110.8333       35.4000           98       163     2012      01        29        029              0.096167       2.414154       0.000000       0.195796       0.116000   -9999.000000       0.046900       0.147000
53956     53956     shanxi         110.8333       35.4000           98       163     2012      01        30        030              0.096458       2.726288       0.875372       0.196103   -9999.000000   -9999.000000       0.049800   -9999.000000
53956     53956     shanxi         110.8333       35.4000           98       163     2012      01        31        031              0.100292       2.570343       0.000000       0.196143   -9999.000000   -9999.000000   -9999.000000       0.297000
53956     53956     shanxi         110.8333       35.4000           98       163     2012      02        01        032              0.097583       3.838043      28.158321       0.198767   -9999.000000   -9999.000000       0.026300   -9999.000000
53956     53956     shanxi         110.8333       35.4000           98       163     2012      02        02        033              0.094667       1.477692       0.000000       0.191529       0.101000       0.061400       0.042100       0.105000
53956     53956     shanxi         110.8333       35.4000           98       163     2012      02        03        034              0.095792       1.123505       2.383299       0.187401       0.103000   -9999.000000       0.038000       0.097000
53956     53956     shanxi         110.8333       35.4000           98       163     2012      02        04        035              0.095958       2.418488       0.000000       0.189779   -9999.000000       0.071200       0.048000   -9999.000000
53956     53956     shanxi         110.8333       35.4000           98       163     2012      02        05        036              0.099625       1.463165       0.000000       0.189811   -9999.000000       0.109500   -9999.000000       0.259000
53956     53956     shanxi         110.8333       35.4000           98       163     2012      02        06        037              0.097542       2.952606       0.000000       0.193406   -9999.000000   -9999.000000   -9999.000000   -9999.000000
53956     53956     shanxi         110.8333       35.4000           98       163     2012      02        07        038              0.090667       0.838104       0.000000       0.186154   -9999.000000   -9999.000000       0.010000       0.045000
53956     53956     shanxi         110.8333       35.4000           98       163     2012      02        08        039              0.088870      -0.578094       0.000000       0.180121   -9999.000000   -9999.000000       0.039400       0.189000
53956     53956     shanxi         110.8333       35.4000           98       163     2012      02        09        040              0.092750      -1.874390       0.000000       0.176781   -9999.000000       0.129200       0.038100       0.051000
53956     53956     shanxi         110.8333       35.4000           98       163     2012      02        10        041              0.096333      -0.381897       0.000000       0.180834   -9999.000000   -9999.000000       0.046000       0.054000
53956     53956     shanxi         110.8333       35.4000           98       163     2012      02        11        042              0.100083       1.311951       0.000000       0.182941   -9999.000000   -9999.000000   -9999.000000   -9999.000000
53956     53956     shanxi         110.8333       35.4000           98       163     2012      02        12        043              0.112333       3.121460       0.000000       0.187261   -9999.000000   -9999.000000   -9999.000000       0.216000
53956     53956     shanxi         110.8333       35.4000           98       163     2012      02        13        044              0.109250       2.568787       0.000000       0.187903       0.098000   -9999.000000   -9999.000000       0.160000
53956     53956     shanxi         110.8333       35.4000           98       163     2012      02        14        045              0.110375       2.344208       0.241950       0.188571       0.090000   -9999.000000       0.046700       0.278000
53956     53956     shanxi         110.8333       35.4000           98       163     2012      02        15        046              0.121125       4.151031       0.000000       0.191187   -9999.000000   -9999.000000       0.047700       0.191000
53956     53956     shanxi         110.8333       35.4000           98       163     2012      02        16        047              0.113000       4.378204       0.486831       0.190691   -9999.000000   -9999.000000       0.045200   -9999.000000
53956     53956     shanxi         110.8333       35.4000           98       163     2012      02        17        048              0.102083       3.387878       0.000000       0.186010   -9999.000000   -9999.000000   -9999.000000       0.052000
53956     53956     shanxi         110.8333       35.4000           98       163     2012      02        18        049              0.099542       1.923798       1.203418       0.182632       0.093000       0.044300       0.018200       0.218000
53956     53956     shanxi         110.8333       35.4000           98       163     2012      02        19        050              0.102833       2.361420       0.000000       0.182185       0.091000   -9999.000000       0.044400       0.229000
53956     53956     shanxi         110.8333       35.4000           98       163     2012      02        20        051              0.116750       4.400940       0.333051       0.184184   -9999.000000       0.098700       0.041100       0.175000
53956     53956     shanxi         110.8333       35.4000           98       163     2012      02        21        052              0.130958       5.892120       0.000000       0.185145   -9999.000000   -9999.000000   -9999.000000   -9999.000000
53956     53956     shanxi         110.8333       35.4000           98       163     2012      02        22        053              0.161417       6.006714       0.000000       0.185773       0.080000   -9999.000000   -9999.000000       0.315000
53956     53956     shanxi         110.8333       35.4000           98       163     2012      02        23        054              0.184958       7.816071       0.252059       0.185689   -9999.000000   -9999.000000       0.040600   -9999.000000
53956     53956     shanxi         110.8333       35.4000           98       163     2012      02        24        055              0.196333       5.247772       0.000000       0.185429       0.092000   -9999.000000       0.010000       0.364000
53956     53956     shanxi         110.8333       35.4000           98       163     2012      02        25        056              0.198125       6.248383       0.252316       0.185280   -9999.000000       0.089400       0.044100       0.294000
53956     53956     shanxi         110.8333       35.4000           98       163     2012      02        26        057              0.194750       3.566650       0.570700       0.185506   -9999.000000       0.140500       0.045000   -9999.000000
53956     53956     shanxi         110.8333       35.4000           98       163     2012      02        27        058              0.191375       5.293243       0.000000       0.185921       0.088000   -9999.000000   -9999.000000       0.306000
53956     53956     shanxi         110.8333       35.4000           98       163     2012      02        28        059              0.191542       5.779297       0.000000       0.185578       0.082000       0.275200   -9999.000000   -9999.000000
53956     53956     shanxi         110.8333       35.4000           98       163     2012      02        29        060              0.000000   -9999.000000       0.000000   -9999.000000       0.089000   -9999.000000   -9999.000000   -9999.000000
53956     53956     shanxi         110.8333       35.4000           98       163     2012      03        01        061              0.211333       6.072571       0.463072       0.185197   -9999.000000   -9999.000000       0.035200   -9999.000000
53956     53956     shanxi         110.8333       35.4000           98       163     2012      03        02        062              0.216333       4.910156       0.000000       0.187502   -9999.000000   -9999.000000       0.055700       0.515000
53956     53956     shanxi         110.8333       35.4000           98       163     2012      03        03        063              0.211500       5.160156       0.000000       0.189054   -9999.000000   -9999.000000       0.052000       0.351000
53956     53956     shanxi         110.8333       35.4000           98       163     2012      03        04        064              0.208500       4.383453       0.065684       0.188813   -9999.000000   -9999.000000       0.054500   -9999.000000
53956     53956     shanxi         110.8333       35.4000           98       163     2012      03        05        065              0.205292       4.763824       0.460935       0.188951       0.104000   -9999.000000   -9999.000000       0.318000
53956     53956     shanxi         110.8333       35.4000           98       163     2012      03        06        066              0.200875       6.656128       0.312197       0.188111   -9999.000000   -9999.000000       0.018600   -9999.000000
53956     53956     shanxi         110.8333       35.4000           98       163     2012      03        07        067              0.000000       4.876587       0.151876       0.185773   -9999.000000       0.089100       0.046100       0.265000
53956     53956     shanxi         110.8333       35.4000           98       163     2012      03        08        068              0.196500       8.402649       0.312858       0.183209   -9999.000000   -9999.000000       0.040800       0.323000
53956     53956     shanxi         110.8333       35.4000           98       163     2012      03        09        069              0.194000       8.176392       0.000000       0.182199       0.084000       0.127400       0.046900       0.338000
53956     53956     shanxi         110.8333       35.4000           98       163     2012      03        10        070              0.193750       8.715424       0.219527       0.181237       0.100000   -9999.000000   -9999.000000       0.357000
53956     53956     shanxi         110.8333       35.4000           98       163     2012      03        11        071              0.190792      11.101471       0.000000       0.178892       0.086000       0.116900       0.045600   -9999.000000
53956     53956     shanxi         110.8333       35.4000           98       163     2012      03        12        072              0.187167       9.435883       0.632907       0.176364   -9999.000000       0.072700       0.010000       0.261000
53956     53956     shanxi         110.8333       35.4000           98       163     2012      03        13        073              0.187750       9.034698       0.000000       0.175635   -9999.000000   -9999.000000       0.040200       0.267000
53956     53956     shanxi         110.8333       35.4000           98       163     2012      03        14        074              0.187217      12.500427       0.202009       0.174362       0.074000       0.079500   -9999.000000       0.318000
53956     53956     shanxi         110.8333       35.4000           98       163     2012      03        15        075              0.183500      12.787811       0.861345       0.174904   -9999.000000   -9999.000000       0.059000       0.644000
53956     53956     shanxi         110.8333       35.4000           98       163     2012      03        16        076              0.186333       7.764099       0.348711       0.179799       0.089000   -9999.000000   -9999.000000   -9999.000000
53956     53956     shanxi         110.8333       35.4000           98       163     2012      03        17        077              0.187708      13.224609       0.000000       0.178973       0.080000       0.143700       0.040800       0.392000
53956     53956     shanxi         110.8333       35.4000           98       163     2012      03        18        078              0.185708      15.639465       0.759024       0.175443   -9999.000000   -9999.000000       0.039900       0.347000
53956     53956     shanxi         110.8333       35.4000           98       163     2012      03        19        079              0.179583      14.253235       0.000000       0.180594   -9999.000000   -9999.000000       0.067200       0.429000
53956     53956     shanxi         110.8333       35.4000           98       163     2012      03        20        080              0.178792       8.051788       0.000000       0.184211       0.076000       0.235800       0.061400       0.222000
53956     53956     shanxi         110.8333       35.4000           98       163     2012      03        21        081              0.232667      10.146515       2.731228       0.182368   -9999.000000   -9999.000000       0.083200   -9999.000000
53956     53956     shanxi         110.8333       35.4000           98       163     2012      03        22        082              0.243292       5.239410       0.445977       0.221047   -9999.000000       0.173200   -9999.000000       0.799000
53956     53956     shanxi         110.8333       35.4000           98       163     2012      03        23        083              0.227875       7.920593       0.601740       0.224412   -9999.000000   -9999.000000       0.029600   -9999.000000
53956     53956     shanxi         110.8333       35.4000           98       163     2012      03        24        084              0.219583      10.579285       0.000000       0.216331   -9999.000000   -9999.000000   -9999.000000       0.332000
53956     53956     shanxi         110.8333       35.4000           98       163     2012      03        25        085              0.000000      13.919708       0.321672       0.198234       0.079000       0.162800       0.052500       0.302000
53956     53956     shanxi         110.8333       35.4000           98       163     2012      03        26        086              0.209917      15.598602       0.000000       0.185900       0.090000   -9999.000000       0.071800   -9999.000000
53956     53956     shanxi         110.8333       35.4000           98       163     2012      03        27        087              0.207167      16.181885       1.740724       0.179327       0.091000   -9999.000000   -9999.000000       0.429000
53956     53956     shanxi         110.8333       35.4000           98       163     2012      03        28        088              0.212250      18.873932       1.227798       0.174876   -9999.000000   -9999.000000       0.088300   -9999.000000
53956     53956     shanxi         110.8333       35.4000           98       163     2012      03        29        089              0.222667      16.769257       0.000000       0.186762   -9999.000000   -9999.000000       0.037000       0.584000
53956     53956     shanxi         110.8333       35.4000           98       163     2012      03        30        090              0.207250      18.167328       0.203106       0.188344       0.078000   -9999.000000       0.062800   -9999.000000
53956     53956     shanxi         110.8333       35.4000           98       163     2012      03        31        091              0.202250      13.754120       0.926803       0.180408       0.087000   -9999.000000       0.059300       0.367000
53956     53956     shanxi         110.8333       35.4000           98       163     2012      04        01        092              0.199750      17.658875       0.069266       0.173909       0.096000       0.027500       0.069400       0.383000
53956     53956     shanxi         110.8333       35.4000           98       163     2012      04        02        093              0.190000      19.544617       1.229341       0.171085       0.103000   -9999.000000   -9999.000000   -9999.000000
53956     53956     shanxi         110.8333       35.4000           98       163     2012      04        03        094              0.186167      14.798309       1.875217       0.184543   -9999.000000   -9999.000000       0.050500       0.518000
53956     53956     shanxi         110.8333       35.4000           98       163     2012      04        04        095              0.184375      17.226532       0.000000       0.177848       0.096000       0.059200       0.057700   -9999.000000
53956     53956     shanxi         110.8333       35.4000           98       163     2012      04        05        096              0.178792      20.717285       1.419832       0.170600       0.082000   -9999.000000       0.053400       0.258000
53956     53956     shanxi         110.8333       35.4000           98       163     2012      04        06        097              0.173208      20.188660       0.338325       0.167584       0.093000   -9999.000000       0.063400       0.374000
53956     53956     shanxi         110.8333       35.4000           98       163     2012      04        07        098              0.170500      20.694397       0.000000       0.167414       0.091000       0.079900       0.058700       0.320000
53956     53956     shanxi         110.8333       35.4000           98       163     2012      04        08        099              0.166917      21.959381       0.000000       0.166083       0.092000   -9999.000000   -9999.000000       0.361000
53956     53956     shanxi         110.8333       35.4000           98       163     2012      04        09        100              0.159667      23.788666       0.886654       0.165189       0.105000   -9999.000000       0.038100   -9999.000000
53956     53956     shanxi         110.8333       35.4000           98       163     2012      04        10        101              0.156042      20.795410       0.063520       0.170781       0.092500   -9999.000000       0.067300       0.407000
53956     53956     shanxi         110.8333       35.4000           98       163     2012      04        11        102              0.152750      21.188599       4.219943       0.176107       0.104000   -9999.000000       0.058100       0.388000
53956     53956     shanxi         110.8333       35.4000           98       163     2012      04        12        103              0.147333      20.734100       0.105184       0.186651       0.116000   -9999.000000       0.071800       0.592000
53956     53956     shanxi         110.8333       35.4000           98       163     2012      04        13        104              0.147375      16.195282       0.000000       0.218145       0.110000   -9999.000000   -9999.000000       0.299000
53956     53956     shanxi         110.8333       35.4000           98       163     2012      04        14        105              0.142500      20.016937       0.350552       0.191168       0.108000   -9999.000000       0.060300   -9999.000000
53956     53956     shanxi         110.8333       35.4000           98       163     2012      04        15        106              0.141000      19.341553       0.000000       0.181308       0.087000   -9999.000000       0.027600       0.178000
53956     53956     shanxi         110.8333       35.4000           98       163     2012      04        16        107              0.136167      22.711365       0.000000       0.173420       0.100000   -9999.000000       0.080300       0.261000
53956     53956     shanxi         110.8333       35.4000           98       163     2012      04        17        108              0.131083      23.493713       0.170367       0.169278       0.094000   -9999.000000       0.069200       0.343000
53956     53956     shanxi         110.8333       35.4000           98       163     2012      04        18        109              0.129375      21.305664       0.000000       0.169820   -9999.000000   -9999.000000   -9999.000000       0.178000
53956     53956     shanxi         110.8333       35.4000           98       163     2012      04        19        110              0.126792      24.372528       5.614512       0.167552       0.095000       0.172500   -9999.000000   -9999.000000
53956     53956     shanxi         110.8333       35.4000           98       163     2012      04        20        111              0.121750      24.716553       0.346279       0.192406       0.117000   -9999.000000       0.068400       0.499000
53956     53956     shanxi         110.8333       35.4000           98       163     2012      04        21        112              0.119583      19.328888       0.000000       0.232516       0.111000   -9999.000000       0.071700   -9999.000000
53956     53956     shanxi         110.8333       35.4000           98       163     2012      04        22        113              0.117292      23.426636       0.000000       0.203754       0.103000       0.327500   -9999.000000       0.426000
53956     53956     shanxi         110.8333       35.4000           98       163     2012      04        23        114              0.114958      26.907867       0.151074       0.183762       0.108000   -9999.000000       0.089500       0.241000
53956     53956     shanxi         110.8333       35.4000           98       163     2012      04        24        115              0.121042      26.638794       0.683008       0.177157       0.147000   -9999.000000   -9999.000000   -9999.000000
53956     53956     shanxi         110.8333       35.4000           98       163     2012      04        25        116              0.000000      19.331787       0.103971       0.182053       0.110000       0.015900   -9999.000000       0.351000
53956     53956     shanxi         110.8333       35.4000           98       163     2012      04        26        117              0.120708      22.006378       0.000000       0.171420       0.102000   -9999.000000       0.039700   -9999.000000
53956     53956     shanxi         110.8333       35.4000           98       163     2012      04        27        118              0.117917      24.489960       0.000000       0.168009       0.099000   -9999.000000       0.041000       0.377000
53956     53956     shanxi         110.8333       35.4000           98       163     2012      04        28        119              0.114083      26.733307       0.160547       0.166101       0.093000   -9999.000000       0.081300   -9999.000000
53956     53956     shanxi         110.8333       35.4000           98       163     2012      04        29        120              0.110542      27.981018       0.000000       0.165199       0.116000   -9999.000000       0.085100       0.239000
53956     53956     shanxi         110.8333       35.4000           98       163     2012      04        30        121              0.104292      27.686401       0.104590       0.164529       0.140000   -9999.000000   -9999.000000       0.576000
53956     53956     shanxi         110.8333       35.4000           98       163     2012      05        01        122              0.103250      22.572144       1.038425       0.168106       0.178500   -9999.000000       0.083700   -9999.000000
53956     53956     shanxi         110.8333       35.4000           98       163     2012      05        02        123              0.104292      23.465790       0.000000       0.168606       0.163500       0.052100       0.046300       0.438000
53956     53956     shanxi         110.8333       35.4000           98       163     2012      05        03        124              0.102167      27.441284       0.000000       0.164699       0.143000   -9999.000000       0.082900   -9999.000000
53956     53956     shanxi         110.8333       35.4000           98       163     2012      05        04        125              0.100458      26.991211       0.000000       0.163009       0.160000   -9999.000000       0.081300       0.169000
53956     53956     shanxi         110.8333       35.4000           98       163     2012      05        05        126              0.098042      28.761993       0.000000       0.161197       0.163000   -9999.000000       0.085200       0.380000
53956     53956     shanxi         110.8333       35.4000           98       163     2012      05        06        127              0.096083      30.403931       0.365890       0.160159       0.098000   -9999.000000   -9999.000000       0.291000
53956     53956     shanxi         110.8333       35.4000           98       163     2012      05        07        128              0.092958      31.425354       0.209299       0.160629   -9999.000000   -9999.000000       0.076700       0.304000
53956     53956     shanxi         110.8333       35.4000           98       163     2012      05        08        129              0.094125      29.159424       0.000000       0.162272       0.135000   -9999.000000       0.104100   -9999.000000
53956     53956     shanxi         110.8333       35.4000           98       163     2012      05        09        130              0.093375      31.994049       0.000000       0.160459   -9999.000000   -9999.000000       0.092600       0.314000
53956     53956     shanxi         110.8333       35.4000           98       163     2012      05        10        131              0.093190      29.496185       0.000000       0.160173       0.165000   -9999.000000       0.094500       0.441000
53956     53956     shanxi         110.8333       35.4000           98       163     2012      05        11        132              0.088083      31.790894       1.332655       0.158851       0.213500   -9999.000000   -9999.000000       0.283000
53956     53956     shanxi         110.8333       35.4000           98       163     2012      05        12        133              0.086833      24.415985       0.000000       0.171689       0.188000   -9999.000000   -9999.000000       0.207000
53956     53956     shanxi         110.8333       35.4000           98       163     2012      05        13        134              0.088042      22.145508       0.000000       0.167830       0.167000       0.196800       0.046000   -9999.000000
53956     53956     shanxi         110.8333       35.4000           98       163     2012      05        14        135              0.089292      25.021637       0.000000       0.160114       0.160000   -9999.000000       0.142400       0.307000
53956     53956     shanxi         110.8333       35.4000           98       163     2012      05        15        136              0.087958      26.781281       0.000000       0.157659       0.183000       0.265800       0.127300       0.312000
53956     53956     shanxi         110.8333       35.4000           98       163     2012      05        16        137              0.085292      27.678223       0.000000       0.156135       0.175000   -9999.000000       0.137000       0.310000
53956     53956     shanxi         110.8333       35.4000           98       163     2012      05        17        138              0.083917      28.135132       0.206203       0.155356       0.158500   -9999.000000   -9999.000000       0.215000
53956     53956     shanxi         110.8333       35.4000           98       163     2012      05        18        139              0.081542      29.579559       0.000000       0.155051       0.153000   -9999.000000       0.129300   -9999.000000
53956     53956     shanxi         110.8333       35.4000           98       163     2012      05        19        140              0.080875      30.150452       0.000000       0.155629       0.156000   -9999.000000       0.092500       0.301000
53956     53956     shanxi         110.8333       35.4000           98       163     2012      05        20        141              0.079250      32.422943       0.000000       0.155178   -9999.000000       0.030400       0.133900   -9999.000000
53956     53956     shanxi         110.8333       35.4000           98       163     2012      05        21        142              0.074208      31.545471       1.509642       0.155202   -9999.000000   -9999.000000       0.128000       0.562000
53956     53956     shanxi         110.8333       35.4000           98       163     2012      05        22        143              0.073792      23.353088       0.313937       0.167911       0.214500   -9999.000000       0.111300       0.271000
53956     53956     shanxi         110.8333       35.4000           98       163     2012      05        23        144              0.075583      24.010162       0.136518       0.172531   -9999.000000   -9999.000000   -9999.000000   -9999.000000
53956     53956     shanxi         110.8333       35.4000           98       163     2012      05        24        145              0.075292      25.792877       0.000000       0.162765       0.216000   -9999.000000       0.074500       0.311000
53956     53956     shanxi         110.8333       35.4000           98       163     2012      05        25        146              0.000000      24.903229       0.000000       0.159183   -9999.000000   -9999.000000       0.111500   -9999.000000
53956     53956     shanxi         110.8333       35.4000           98       163     2012      05        26        147              0.077500      27.597351       0.000000       0.156591       0.223000   -9999.000000       0.102100       0.353000
53956     53956     shanxi         110.8333       35.4000           98       163     2012      05        27        148              0.077417      30.196503       0.000000       0.155174       0.175000   -9999.000000       0.107600   -9999.000000
53956     53956     shanxi         110.8333       35.4000           98       163     2012      05        28        149              0.077792      32.647644      17.156822       0.154055       0.204000   -9999.000000   -9999.000000       0.314000
53956     53956     shanxi         110.8333       35.4000           98       163     2012      05        29        150              0.133167      28.431915       0.241238       0.210070       0.220000   -9999.000000       0.113300       0.559000
53956     53956     shanxi         110.8333       35.4000           98       163     2012      05        30        151              0.132208      26.878296       0.359588       0.269021   -9999.000000       0.164200       0.058700   -9999.000000
53956     53956     shanxi         110.8333       35.4000           98       163     2012      05        31        152              0.125083      27.505493       0.000000       0.225653       0.224000   -9999.000000       0.085100   -9999.000000
53956     53956     shanxi         110.8333       35.4000           98       163     2012      06        01        153              0.124708      25.698059       0.481048       0.205514       0.173000   -9999.000000       0.105000   -9999.000000
53956     53956     shanxi         110.8333       35.4000           98       163     2012      06        02        154              0.123875      28.722931       0.000000       0.191136       0.153000       0.044000       0.108000       0.295000
53956     53956     shanxi         110.8333       35.4000           98       163     2012      06        03        155              0.119208      30.402161       1.533998       0.179553       0.168000   -9999.000000   -9999.000000       0.528000
53956     53956     shanxi         110.8333       35.4000           98       163     2012      06        04        156              0.117667      30.072266       0.425763       0.174051       0.163000       0.064800       0.155300       0.346000
53956     53956     shanxi         110.8333       35.4000           98       163     2012      06        05        157              0.111792      32.030334       2.703093       0.170635       0.185000       0.031700       0.138100       0.479000
53956     53956     shanxi         110.8333       35.4000           98       163     2012      06        06        158              0.107792      27.868011       0.751098       0.194382       0.197000   -9999.000000       0.181400   -9999.000000
53956     53956     shanxi         110.8333       35.4000           98       163     2012      06        07        159              0.110250      25.784027       1.815884       0.193481       0.176500       0.098400       0.168700       0.313000
53956     53956     shanxi         110.8333       35.4000           98       163     2012      06        08        160              0.105875      29.730194       0.000000       0.189468       0.170000   -9999.000000       0.170600       0.428000
53956     53956     shanxi         110.8333       35.4000           98       163     2012      06        09        161              0.107958      29.166382       0.000000       0.177948       0.145000   -9999.000000   -9999.000000       0.434000
53956     53956     shanxi         110.8333       35.4000           98       163     2012      06        10        162              0.104292      33.182831       0.000000       0.166669       0.166000       0.057900       0.105300       0.340000
53956     53956     shanxi         110.8333       35.4000           98       163     2012      06        11        163              0.000000      31.103180       0.340745       0.163217       0.183000   -9999.000000       0.244500   -9999.000000
53956     53956     shanxi         110.8333       35.4000           98       163     2012      06        12        164              0.101042      32.268890       0.539762       0.160942       0.158000   -9999.000000       0.222600       0.262000
53956     53956     shanxi         110.8333       35.4000           98       163     2012      06        13        165              0.098792      33.863434       0.000000       0.159707       0.179500   -9999.000000       0.226600       0.505000
53956     53956     shanxi         110.8333       35.4000           98       163     2012      06        14        166              0.093667      35.040558       0.000000       0.158547       0.171000   -9999.000000   -9999.000000       0.511000
53956     53956     shanxi         110.8333       35.4000           98       163     2012      06        15        167              0.091042      31.697937       0.000000       0.158087   -9999.000000   -9999.000000       0.231600       0.310000
53956     53956     shanxi         110.8333       35.4000           98       163     2012      06        16        168              0.089792      32.159698       0.000000       0.157115       0.191000   -9999.000000       0.123300   -9999.000000
53956     53956     shanxi         110.8333       35.4000           98       163     2012      06        17        169              0.087042      33.764435       0.000000       0.156495       0.169500   -9999.000000       0.233800       0.413000
53956     53956     shanxi         110.8333       35.4000           98       163     2012      06        18        170              0.083958      35.000671       0.352770       0.156223       0.184500   -9999.000000       0.148300   -9999.000000
53956     53956     shanxi         110.8333       35.4000           98       163     2012      06        19        171              0.080583      34.945465       1.638449       0.156908       0.223000   -9999.000000       0.161000       0.539000
53956     53956     shanxi         110.8333       35.4000           98       163     2012      06        20        172              0.078917      32.220703       0.000000       0.169527       0.189000       0.111900   -9999.000000       0.403000
53956     53956     shanxi         110.8333       35.4000           98       163     2012      06        21        173              0.077458      33.047394       0.731730       0.164455       0.185000   -9999.000000       0.144700   -9999.000000
53956     53956     shanxi         110.8333       35.4000           98       163     2012      06        22        174              0.076375      33.869232       0.000000       0.159172       0.173500   -9999.000000       0.158300       0.483000
53956     53956     shanxi         110.8333       35.4000           98       163     2012      06        23        175              0.073917      35.669647       5.924646       0.157057       0.177500       0.139200       0.146200   -9999.000000
53956     53956     shanxi         110.8333       35.4000           98       163     2012      06        24        176              0.072417      35.873047       0.358410       0.176419       0.178000   -9999.000000       0.179700       0.611000
53956     53956     shanxi         110.8333       35.4000           98       163     2012      06        25        177              0.081417      30.698975       8.204062       0.214348   -9999.000000       0.138700       0.193900   -9999.000000
53956     53956     shanxi         110.8333       35.4000           98       163     2012      06        26        178              0.093625      26.941315       0.250458       0.260003       0.219000   -9999.000000   -9999.000000       0.714000
53956     53956     shanxi         110.8333       35.4000           98       163     2012      06        27        179              0.101042      26.755646       0.194351       0.230135       0.243000   -9999.000000       0.103300       0.715000
53956     53956     shanxi         110.8333       35.4000           98       163     2012      06        28        180              0.101208      27.308258       3.162627       0.206072       0.247000       0.253500       0.184800   -9999.000000
53956     53956     shanxi         110.8333       35.4000           98       163     2012      06        29        181              0.123625      26.022308       6.131660       0.201617       0.296000   -9999.000000       0.180600       1.000000
53956     53956     shanxi         110.8333       35.4000           98       163     2012      06        30        182              0.143958      26.247131       0.000000       0.276600       0.187000   -9999.000000       0.157300   -9999.000000
53956     53956     shanxi         110.8333       35.4000           98       163     2012      07        01        183              0.142750      30.072205       0.274871       0.230462       0.205000   -9999.000000   -9999.000000       0.518000
53956     53956     shanxi         110.8333       35.4000           98       163     2012      07        02        184              0.135417      32.507721       0.854423       0.197840       0.234000       0.142000       0.131800       0.606000
53956     53956     shanxi         110.8333       35.4000           98       163     2012      07        03        185              0.134167      31.872925       0.000000       0.183224       0.166500   -9999.000000       0.078000       0.539000
53956     53956     shanxi         110.8333       35.4000           98       163     2012      07        04        186              0.123458      32.543457       1.145348       0.177246       0.238500   -9999.000000       0.158900       0.621000
53956     53956     shanxi         110.8333       35.4000           98       163     2012      07        05        187              0.126583      28.312225       0.000000       0.187917       0.193000       0.163100       0.138700   -9999.000000
53956     53956     shanxi         110.8333       35.4000           98       163     2012      07        06        188              0.125208      33.120758       0.380977       0.174348   -9999.000000   -9999.000000       0.142900       0.341000
53956     53956     shanxi         110.8333       35.4000           98       163     2012      07        07        189              0.119750      33.103912       0.466904       0.169556   -9999.000000   -9999.000000   -9999.000000       0.604000
53956     53956     shanxi         110.8333       35.4000           98       163     2012      07        08        190              0.157750      31.026154      45.196507       0.172426       0.347000       0.344600       0.161800       0.601000
53956     53956     shanxi         110.8333       35.4000           98       163     2012      07        09        191              0.227917      27.702637       3.113156       0.301609       0.290000   -9999.000000       0.203900       1.000000
53956     53956     shanxi         110.8333       35.4000           98       163     2012      07        10        192              0.212875      26.412445       0.000000       0.333654       0.212000   -9999.000000       0.187800   -9999.000000
53956     53956     shanxi         110.8333       35.4000           98       163     2012      07        11        193              0.196667      31.346222       0.000000       0.297111       0.197000       0.213700       0.196100       0.710000
53956     53956     shanxi         110.8333       35.4000           98       163     2012      07        12        194              0.184500      30.577728       0.000000       0.274402       0.209000   -9999.000000   -9999.000000       0.677000
53956     53956     shanxi         110.8333       35.4000           98       163     2012      07        13        195              0.171087      32.288239      11.247472       0.245800       0.272000   -9999.000000   -9999.000000       0.623000
53956     53956     shanxi         110.8333       35.4000           98       163     2012      07        14        196              0.166625      28.821838       0.379868       0.304563       0.208000   -9999.000000       0.102100       0.614000
53956     53956     shanxi         110.8333       35.4000           98       163     2012      07        15        197              0.157739      28.659607       0.000000       0.279414       0.216500   -9999.000000       0.184800   -9999.000000
53956     53956     shanxi         110.8333       35.4000           98       163     2012      07        16        198              0.148000      28.774719       0.000000       0.256408       0.191000       0.157600       0.132200       0.555000
53956     53956     shanxi         110.8333       35.4000           98       163     2012      07        17        199              0.138458      28.966675       0.000000       0.236680   -9999.000000   -9999.000000       0.140100   -9999.000000
53956     53956     shanxi         110.8333       35.4000           98       163     2012      07        18        200              0.130125      29.609222       0.000000       0.217974       0.214000   -9999.000000   -9999.000000       0.688000
53956     53956     shanxi         110.8333       35.4000           98       163     2012      07        19        201              0.120500      31.088654       0.000000       0.203240       0.179000   -9999.000000       0.124600       0.399000
53956     53956     shanxi         110.8333       35.4000           98       163     2012      07        20        202              0.112435      32.402985       0.536581       0.192984       0.186000       0.118700       0.089200   -9999.000000
53956     53956     shanxi         110.8333       35.4000           98       163     2012      07        21        203              0.105217      33.294098      14.459870       0.187403       0.231000   -9999.000000       0.158300       1.000000
53956     53956     shanxi         110.8333       35.4000           98       163     2012      07        22        204              0.104500      29.610260       0.000000       0.283976       0.196000   -9999.000000       0.132500   -9999.000000
53956     53956     shanxi         110.8333       35.4000           98       163     2012      07        23        205              0.101000      29.954895       1.175206       0.262634   -9999.000000   -9999.000000       0.138100       0.655000
53956     53956     shanxi         110.8333       35.4000           98       163     2012      07        24        206              0.098708      29.034607       0.084649       0.241675       0.226500   -9999.000000   -9999.000000   -9999.000000
53956     53956     shanxi         110.8333       35.4000           98       163     2012      07        25        207              0.095458      30.593140       2.582494       0.229931   -9999.000000   -9999.000000       0.105600       0.526000
53956     53956     shanxi         110.8333       35.4000           98       163     2012      07        26        208              0.092167      32.006378       0.158401       0.211539       0.225000       0.264200       0.129100       0.691000
53956     53956     shanxi         110.8333       35.4000           98       163     2012      07        27        209              0.087500      34.481262       0.000000       0.195800       0.183000   -9999.000000       0.124500   -9999.000000
53956     53956     shanxi         110.8333       35.4000           98       163     2012      07        28        210              0.084000      35.511322       0.346042       0.184904       0.234000   -9999.000000       0.134900       0.653000
53956     53956     shanxi         110.8333       35.4000           98       163     2012      07        29        211              0.082708      37.383698       1.221886       0.179379       0.247000       0.081600   -9999.000000   -9999.000000
53956     53956     shanxi         110.8333       35.4000           98       163     2012      07        30        212              0.089348      35.610168      27.004257       0.187641       0.363000   -9999.000000   -9999.000000       0.641000
53956     53956     shanxi         110.8333       35.4000           98       163     2012      07        31        213              0.096792      31.488831       0.942734       0.303296       0.296000       0.083800       0.065200       0.937000
53956     53956     shanxi         110.8333       35.4000           98       163     2012      08        01        214              0.100375      27.643616       0.073441       0.311011   -9999.000000   -9999.000000       0.110200       0.811000
53956     53956     shanxi         110.8333       35.4000           98       163     2012      08        02        215              0.103042      26.979553       2.100513       0.284482   -9999.000000   -9999.000000       0.107200       0.759000
53956     53956     shanxi         110.8333       35.4000           98       163     2012      08        03        216              0.102136      29.344971       0.297699       0.272161       0.230000       0.124500       0.111800   -9999.000000
53956     53956     shanxi         110.8333       35.4000           98       163     2012      08        04        217              0.097833      30.415192       8.482855       0.254447       0.199000   -9999.000000   -9999.000000       0.663000
53956     53956     shanxi         110.8333       35.4000           98       163     2012      08        05        218              0.092917      31.520569       2.956124       0.233286       0.221500       0.175000       0.100800       0.832000
53956     53956     shanxi         110.8333       35.4000           98       163     2012      08        06        219              0.093625      29.328705       0.000000       0.247336       0.197000   -9999.000000       0.122900       0.744000
53956     53956     shanxi         110.8333       35.4000           98       163     2012      08        07        220              0.091708      30.705170       0.000000       0.229048       0.185000   -9999.000000       0.140800       0.582000
53956     53956     shanxi         110.8333       35.4000           98       163     2012      08        08        221              0.088870      33.167450       3.791827       0.210375       0.236000   -9999.000000       0.157300   -9999.000000
53956     53956     shanxi         110.8333       35.4000           98       163     2012      08        09        222              0.084591      31.925659       8.065452       0.235176       0.217000   -9999.000000       0.168500       0.838000
53956     53956     shanxi         110.8333       35.4000           98       163     2012      08        10        223              0.086087      27.469543       0.000000       0.287525       0.186000       0.062800   -9999.000000       0.634000
53956     53956     shanxi         110.8333       35.4000           98       163     2012      08        11        224              0.084125      30.134766       0.992413       0.250249       0.214000       0.125500       0.106800       0.740000
53956     53956     shanxi         110.8333       35.4000           98       163     2012      08        12        225              0.081250      31.485474       0.666855       0.229368       0.214000   -9999.000000       0.155100       0.413000
53956     53956     shanxi         110.8333       35.4000           98       163     2012      08        13        226              0.078091      29.707397       4.592330       0.221131   -9999.000000       0.128900       0.116300   -9999.000000
53956     53956     shanxi         110.8333       35.4000           98       163     2012      08        14        227              0.076435      25.718292      12.050454       0.242970       0.257000   -9999.000000       0.138500       0.831000
53956     53956     shanxi         110.8333       35.4000           98       163     2012      08        15        228              0.078500      24.918579       0.000000       0.312138       0.193000   -9999.000000   -9999.000000   -9999.000000
53956     53956     shanxi         110.8333       35.4000           98       163     2012      08        16        229              0.080826      28.131073       0.000000       0.272404       0.201000       0.084300       0.115100       0.698000
53956     53956     shanxi         110.8333       35.4000           98       163     2012      08        17        230              0.103500      28.724335      62.739590       0.247255       0.189000   -9999.000000       0.089800       0.429000
53956     53956     shanxi         110.8333       35.4000           98       163     2012      08        18        231              0.242913      28.657227      14.356615       0.294226   -9999.000000       0.070400       0.128300   -9999.000000
53956     53956     shanxi         110.8333       35.4000           98       163     2012      08        19        232              0.235792      24.548615       1.684389       0.382433       0.285000   -9999.000000       0.128500       1.000000
53956     53956     shanxi         110.8333       35.4000           98       163     2012      08        20        233              0.226083      23.912750       0.085170       0.355537       0.270000   -9999.000000       0.213800   -9999.000000
53956     53956     shanxi         110.8333       35.4000           98       163     2012      08        21        234              0.214261      24.908203       0.000000       0.341111       0.206000       0.162300   -9999.000000       0.876000
53956     53956     shanxi         110.8333       35.4000           98       163     2012      08        22        235              0.201167      23.934662       0.000000       0.324390       0.200000   -9999.000000       0.170500   -9999.000000
53956     53956     shanxi         110.8333       35.4000           98       163     2012      08        23        236              0.191391      24.568573       0.000000       0.312692       0.173000       0.099500       0.165000       0.685000
53956     53956     shanxi         110.8333       35.4000           98       163     2012      08        24        237              0.182522      23.616089       0.000000       0.300309   -9999.000000   -9999.000000       0.189500       0.554000
53956     53956     shanxi         110.8333       35.4000           98       163     2012      08        25        238              0.000000      25.326843       0.000000       0.290519       0.225000       0.124500       0.187100   -9999.000000
53956     53956     shanxi         110.8333       35.4000           98       163     2012      08        26        239              0.174136      25.394653       0.000000       0.284125       0.185000       0.143700       0.182000       0.752000
53956     53956     shanxi         110.8333       35.4000           98       163     2012      08        27        240              0.170870      26.089142       0.000000       0.277389       0.214500   -9999.000000   -9999.000000   -9999.000000
53956     53956     shanxi         110.8333       35.4000           98       163     2012      08        28        241              0.167273      27.190765       0.000000       0.267874       0.165000       0.031200       0.080900       0.496000
53956     53956     shanxi         110.8333       35.4000           98       163     2012      08        29        242              0.161739      28.592590       0.000000       0.255300   -9999.000000   -9999.000000       0.132300       0.717000
53956     53956     shanxi         110.8333       35.4000           98       163     2012      08        30        243              0.155750      29.362793       0.424128       0.242216       0.205000       0.130300       0.125400       0.553000
53956     53956     shanxi         110.8333       35.4000           98       163     2012      08        31        244              0.195458      29.188354      30.926901       0.234026       0.283000       0.182600       0.177300       0.883000
53956     53956     shanxi         110.8333       35.4000           98       163     2012      09        01        245              0.247875      23.115021      27.236622       0.358361       0.296000   -9999.000000   -9999.000000   -9999.000000
53956     53956     shanxi         110.8333       35.4000           98       163     2012      09        02        246              0.232708      21.626282       0.000000       0.383008       0.227000   -9999.000000       0.155700       0.954000
53956     53956     shanxi         110.8333       35.4000           98       163     2012      09        03        247              0.216583      22.928345       0.000000       0.349279       0.206000       0.263200       0.089000       0.787000
53956     53956     shanxi         110.8333       35.4000           98       163     2012      09        04        248              0.205500      24.020355       0.000000       0.332805       0.242000   -9999.000000       0.138500       0.784000
53956     53956     shanxi         110.8333       35.4000           98       163     2012      09        05        249              0.197458      24.501434       0.000000       0.321173       0.225000       0.108900       0.137100       0.600000
53956     53956     shanxi         110.8333       35.4000           98       163     2012      09        06        250              0.191750      25.165863       4.101482       0.313219       0.223000   -9999.000000       0.157100   -9999.000000
53956     53956     shanxi         110.8333       35.4000           98       163     2012      09        07        251              0.196095      22.711090       1.263746       0.323381       0.227000   -9999.000000   -9999.000000       0.742000
53956     53956     shanxi         110.8333       35.4000           98       163     2012      09        08        252              0.191333      24.856964       0.883341       0.315589       0.227000       0.094800       0.127800       0.675000
53956     53956     shanxi         110.8333       35.4000           98       163     2012      09        09        253              0.187417      25.051697       0.103956       0.306548   -9999.000000   -9999.000000       0.135200       0.754000
53956     53956     shanxi         110.8333       35.4000           98       163     2012      09        10        254              0.218917      25.256683      27.975531       0.295264       0.317000       0.221400       0.161400       1.000000
53956     53956     shanxi         110.8333       35.4000           98       163     2012      09        11        255              0.237542      21.143982       1.749838       0.363994       0.232500   -9999.000000       0.191400   -9999.000000
53956     53956     shanxi         110.8333       35.4000           98       163     2012      09        12        256              0.216227      22.904358       0.000000       0.346280       0.213000   -9999.000000   -9999.000000       0.692000
53956     53956     shanxi         110.8333       35.4000           98       163     2012      09        13        257              0.205636      19.309418       0.000000       0.330067       0.213000       0.091400   -9999.000000   -9999.000000
53956     53956     shanxi         110.8333       35.4000           98       163     2012      09        14        258              0.196917      20.173065       0.000000       0.319501       0.197000   -9999.000000       0.076600       0.623000
53956     53956     shanxi         110.8333       35.4000           98       163     2012      09        15        259              0.189864      21.293427       0.000000       0.311045       0.217000       0.059200       0.167300       0.536000
53956     53956     shanxi         110.8333       35.4000           98       163     2012      09        16        260              0.182000      21.567871       0.000000       0.303575       0.239000   -9999.000000       0.148200   -9999.000000
53956     53956     shanxi         110.8333       35.4000           98       163     2012      09        17        261              0.179333      21.321808       0.685641       0.297872       0.208000   -9999.000000       0.133600       0.600000
53956     53956     shanxi         110.8333       35.4000           98       163     2012      09        18        262              0.176000      21.544525       0.000000       0.296056       0.191000       0.373200   -9999.000000   -9999.000000
53956     53956     shanxi         110.8333       35.4000           98       163     2012      09        19        263              0.170958      23.027130       0.000000       0.290279       0.186000   -9999.000000       0.106300       0.684000
53956     53956     shanxi         110.8333       35.4000           98       163     2012      09        20        264              0.164083      23.634827       2.417144       0.281779       0.286000   -9999.000000       0.100500   -9999.000000
53956     53956     shanxi         110.8333       35.4000           98       163     2012      09        21        265              0.166833      21.460480       0.133588       0.288975   -9999.000000       0.184200       0.129900       0.833000
53956     53956     shanxi         110.8333       35.4000           98       163     2012      09        22        266              0.171167      21.435760       0.000000       0.294199       0.170500   -9999.000000       0.123300       0.679000
53956     53956     shanxi         110.8333       35.4000           98       163     2012      09        23        267              0.169458      22.801208       0.000000       0.284360       0.192500       0.222100       0.132300   -9999.000000
53956     53956     shanxi         110.8333       35.4000           98       163     2012      09        24        268              0.161667      23.342926       0.000000       0.275877       0.177000   -9999.000000   -9999.000000       0.644000
53956     53956     shanxi         110.8333       35.4000           98       163     2012      09        25        269              0.158417      22.754547       2.597556       0.269167   -9999.000000   -9999.000000       0.131000   -9999.000000
53956     53956     shanxi         110.8333       35.4000           98       163     2012      09        26        270              0.162958      20.696442       0.000000       0.283566       0.216000   -9999.000000       0.164800       0.624000
53956     53956     shanxi         110.8333       35.4000           98       163     2012      09        27        271              0.167571      19.564789       0.000000       0.281507       0.179500   -9999.000000       0.142300       0.587000
53956     53956     shanxi         110.8333       35.4000           98       163     2012      09        28        272              0.155867      20.232513       0.000000       0.269630       0.159000   -9999.000000       0.157000       0.571000
53956     53956     shanxi         110.8333       35.4000           98       163     2012      09        29        273              0.155042      18.086365       0.000000       0.259601       0.174000   -9999.000000   -9999.000000       0.488000
53956     53956     shanxi         110.8333       35.4000           98       163     2012      09        30        274              0.152125      19.025818       0.000000       0.252510       0.171000   -9999.000000   -9999.000000   -9999.000000
53956     53956     shanxi         110.8333       35.4000           98       163     2012      10        01        275              0.149958      19.323120       0.000000       0.245887       0.173000       0.002000       0.061400       0.507000
53956     53956     shanxi         110.8333       35.4000           98       163     2012      10        02        276              0.147583      20.471436       0.073636       0.239858       0.163000   -9999.000000       0.156600       0.584000
53956     53956     shanxi         110.8333       35.4000           98       163     2012      10        03        277              0.145542      21.152832       7.466311       0.236293       0.138000       0.096400       0.135900       0.619000
53956     53956     shanxi         110.8333       35.4000           98       163     2012      10        04        278              0.141333      21.916260       2.034389       0.232113       0.174500   -9999.000000       0.168200       0.719000
53956     53956     shanxi         110.8333       35.4000           98       163     2012      10        05        279              0.139083      20.175842       0.522721       0.247087       0.149000   -9999.000000   -9999.000000   -9999.000000
53956     53956     shanxi         110.8333       35.4000           98       163     2012      10        06        280              0.136833      19.995453       0.000000       0.241865   -9999.000000       0.150100       0.138200       0.489000
53956     53956     shanxi         110.8333       35.4000           98       163     2012      10        07        281              0.133417      20.249847       0.000000       0.232620       0.173000   -9999.000000       0.106700       0.603000
53956     53956     shanxi         110.8333       35.4000           98       163     2012      10        08        282              0.131958      18.392365       0.264873       0.231259       0.150000   -9999.000000       0.143300       0.600000
53956     53956     shanxi         110.8333       35.4000           98       163     2012      10        09        283              0.129417      18.684906       0.000000       0.230656       0.135000       0.130400       0.141400       0.376000
53956     53956     shanxi         110.8333       35.4000           98       163     2012      10        10        284              0.127708      19.151062       0.000000       0.222892       0.153000   -9999.000000       0.139500   -9999.000000
53956     53956     shanxi         110.8333       35.4000           98       163     2012      10        11        285              0.127125      19.160461       0.000000       0.216392       0.123000       0.164000   -9999.000000       0.513000
53956     53956     shanxi         110.8333       35.4000           98       163     2012      10        12        286              0.124250      20.338684       0.000000       0.212605       0.131000   -9999.000000       0.087100   -9999.000000
53956     53956     shanxi         110.8333       35.4000           98       163     2012      10        13        287              0.122375      19.873383       0.000000       0.211562       0.128000   -9999.000000       0.146500       0.588000
53956     53956     shanxi         110.8333       35.4000           98       163     2012      10        14        288              0.120208      20.290588       0.000000       0.208044       0.116500       0.173500       0.125200       0.384000
53956     53956     shanxi         110.8333       35.4000           98       163     2012      10        15        289              0.117917      18.991150       5.178165       0.205668       0.150500   -9999.000000       0.140200   -9999.000000
53956     53956     shanxi         110.8333       35.4000           98       163     2012      10        16        290              0.114458      17.721191       0.741170       0.222546       0.137000       0.256800   -9999.000000       0.513000
53956     53956     shanxi         110.8333       35.4000           98       163     2012      10        17        291              0.114417      14.489441       0.151905       0.257248   -9999.000000   -9999.000000       0.137200   -9999.000000
53956     53956     shanxi         110.8333       35.4000           98       163     2012      10        18        292              0.114792      14.303711       1.033071       0.239619       0.141000   -9999.000000       0.073200       0.725000
53956     53956     shanxi         110.8333       35.4000           98       163     2012      10        19        293              0.116375      14.384827       0.394606       0.242483       0.119500       0.051000       0.137700   -9999.000000
53956     53956     shanxi         110.8333       35.4000           98       163     2012      10        20        294              0.117125      16.507782       0.000000       0.237298       0.137500   -9999.000000       0.129400       0.456000
53956     53956     shanxi         110.8333       35.4000           98       163     2012      10        21        295              0.112542      18.087341       5.238522       0.229100       0.190000       0.117000       0.177300       0.794000
53956     53956     shanxi         110.8333       35.4000           98       163     2012      10        22        296              0.111417      12.739227       0.050282       0.269640   -9999.000000   -9999.000000   -9999.000000   -9999.000000
53956     53956     shanxi         110.8333       35.4000           98       163     2012      10        23        297              0.109042      13.069611       0.079262       0.260390   -9999.000000   -9999.000000       0.112200       0.556000
53956     53956     shanxi         110.8333       35.4000           98       163     2012      10        24        298              0.111042      10.262085       2.574183       0.254729   -9999.000000       0.219300       0.102300   -9999.000000
53956     53956     shanxi         110.8333       35.4000           98       163     2012      10        25        299              0.000000      12.810822       0.000000       0.249142       0.151000   -9999.000000       0.108700       0.427000
53956     53956     shanxi         110.8333       35.4000           98       163     2012      10        26        300              0.111708      14.036957       0.000000       0.243439       0.156000   -9999.000000       0.124600       0.579000
53956     53956     shanxi         110.8333       35.4000           98       163     2012      10        27        301              0.111625      13.621552       0.000000       0.241563       0.151000       0.213700       0.125400       0.503000
53956     53956     shanxi         110.8333       35.4000           98       163     2012      10        28        302              0.000000      15.284424       0.618456       0.235952   -9999.000000   -9999.000000   -9999.000000       0.529000
53956     53956     shanxi         110.8333       35.4000           98       163     2012      10        29        303              0.109042      14.538452       0.000000       0.236729   -9999.000000       0.245800       0.052300   -9999.000000
53956     53956     shanxi         110.8333       35.4000           98       163     2012      10        30        304              0.106792      14.252777       0.000000       0.237310       0.132000   -9999.000000       0.120600       0.264000
53956     53956     shanxi         110.8333       35.4000           98       163     2012      10        31        305              0.106583      12.054779       0.000000       0.228314       0.161000   -9999.000000       0.112600       0.503000
53956     53956     shanxi         110.8333       35.4000           98       163     2012      11        01        306              0.106458      12.068542       0.134941       0.222647       0.127000       0.201800       0.130300       0.443000
53956     53956     shanxi         110.8333       35.4000           98       163     2012      11        02        307              0.106917      12.206512       1.299148       0.219627   -9999.000000   -9999.000000   -9999.000000       0.403000
53956     53956     shanxi         110.8333       35.4000           98       163     2012      11        03        308              0.104083      14.099945       0.229851       0.222308   -9999.000000       0.140500       0.128900   -9999.000000
53956     53956     shanxi         110.8333       35.4000           98       163     2012      11        04        309              0.104167       8.320038       0.289006       0.228830       0.135000   -9999.000000       0.053600       0.279000
53956     53956     shanxi         110.8333       35.4000           98       163     2012      11        05        310              0.104667       7.227478       0.000000       0.221836       0.135000   -9999.000000       0.113300       0.509000
53956     53956     shanxi         110.8333       35.4000           98       163     2012      11        06        311              0.106125       7.573242       0.724131       0.218586       0.144000       0.054700       0.103900       0.478000
53956     53956     shanxi         110.8333       35.4000           98       163     2012      11        07        312              0.105833       9.455841       0.112322       0.216599       0.150000   -9999.000000       0.112800       0.252000
53956     53956     shanxi         110.8333       35.4000           98       163     2012      11        08        313              0.106417       8.911469       1.137505       0.217417   -9999.000000       0.118200   -9999.000000   -9999.000000
53956     53956     shanxi         110.8333       35.4000           98       163     2012      11        09        314              0.105125      10.624786       0.283154       0.216253   -9999.000000   -9999.000000       0.104100       0.437000
53956     53956     shanxi         110.8333       35.4000           98       163     2012      11        10        315              0.102333       8.842529       0.148781       0.217610   -9999.000000       0.219400       0.104200   -9999.000000
53956     53956     shanxi         110.8333       35.4000           98       163     2012      11        11        316              0.101417       6.219788       0.000000       0.218048       0.138000   -9999.000000       0.098300       0.409000
53956     53956     shanxi         110.8333       35.4000           98       163     2012      11        12        317              0.102125       6.494690       0.000000       0.214108       0.137000   -9999.000000       0.102600       0.278000
53956     53956     shanxi         110.8333       35.4000           98       163     2012      11        13        318              0.000000       7.984222       0.000000       0.212315   -9999.000000   -9999.000000   -9999.000000   -9999.000000
53956     53956     shanxi         110.8333       35.4000           98       163     2012      11        14        319              0.102917       8.338837       0.000000       0.209611   -9999.000000   -9999.000000   -9999.000000       0.346000
53956     53956     shanxi         110.8333       35.4000           98       163     2012      11        15        320              0.101000       8.511108       0.295940       0.208145   -9999.000000   -9999.000000       0.035000   -9999.000000
53956     53956     shanxi         110.8333       35.4000           98       163     2012      11        16        321              0.102083       6.216827       0.000000       0.211138       0.154000       0.386000       0.102900       0.517000
53956     53956     shanxi         110.8333       35.4000           98       163     2012      11        17        322              0.000000       7.361176       0.000000       0.211317       0.134000   -9999.000000       0.090800   -9999.000000
53956     53956     shanxi         110.8333       35.4000           98       163     2012      11        18        323              0.103292       7.922211       0.000000       0.210053       0.137000   -9999.000000       0.107200       0.441000
53956     53956     shanxi         110.8333       35.4000           98       163     2012      11        19        324              0.104458       8.773468       0.000000       0.208377       0.141000       0.227600   -9999.000000       0.325000
53956     53956     shanxi         110.8333       35.4000           98       163     2012      11        20        325              0.105042       8.767639       0.000000       0.207073       0.130000   -9999.000000       0.077200   -9999.000000
53956     53956     shanxi         110.8333       35.4000           98       163     2012      11        21        326              0.104542       8.016266       0.000000       0.208594       0.109000       0.037900       0.049900       0.396000
53956     53956     shanxi         110.8333       35.4000           98       163     2012      11        22        327              0.102833       8.993042       0.000000       0.208829       0.119000   -9999.000000       0.083100   -9999.000000
53956     53956     shanxi         110.8333       35.4000           98       163     2012      11        23        328              0.101792       6.777649       0.000000       0.207504       0.120000   -9999.000000       0.075800       0.213000
53956     53956     shanxi         110.8333       35.4000           98       163     2012      11        24        329              0.101042       6.132416       0.231481       0.204543   -9999.000000       0.000600       0.084000       0.391000
53956     53956     shanxi         110.8333       35.4000           98       163     2012      11        25        330              0.100000       6.674255       0.246914       0.204760   -9999.000000   -9999.000000   -9999.000000       0.409000
53956     53956     shanxi         110.8333       35.4000           98       163     2012      11        26        331              0.098833       5.080750       0.000000       0.203373       0.105000       0.028400   -9999.000000       0.428000
53956     53956     shanxi         110.8333       35.4000           98       163     2012      11        27        332              0.098792       4.761719       0.000000       0.200074       0.127000   -9999.000000       0.075200   -9999.000000
53956     53956     shanxi         110.8333       35.4000           98       163     2012      11        28        333              0.097375       5.385773       0.142080       0.200853   -9999.000000       0.089200       0.064400       0.139000
53956     53956     shanxi         110.8333       35.4000           98       163     2012      11        29        334              0.093542       2.908142       0.000000       0.196216   -9999.000000       0.044500       0.076400       0.102000
53956     53956     shanxi         110.8333       35.4000           98       163     2012      11        30        335              0.094125       2.238190       0.000000       0.194034   -9999.000000   -9999.000000   -9999.000000       0.243000
53956     53956     shanxi         110.8333       35.4000           98       163     2012      12        01        336              0.098000       3.344330       0.146762       0.198603   -9999.000000   -9999.000000       0.075000       0.478000
53956     53956     shanxi         110.8333       35.4000           98       163     2012      12        02        337              0.097417       1.714386       0.000000       0.201519   -9999.000000   -9999.000000       0.013400   -9999.000000
53956     53956     shanxi         110.8333       35.4000           98       163     2012      12        03        338              0.095167       3.060516       0.000000       0.204651       0.132000   -9999.000000       0.077000       0.221000
53956     53956     shanxi         110.8333       35.4000           98       163     2012      12        04        339              0.093583       3.469727       0.000000       0.201141   -9999.000000       0.055000       0.072400       0.412000
53956     53956     shanxi         110.8333       35.4000           98       163     2012      12        05        340              0.094083       4.332947       0.511570       0.202923   -9999.000000   -9999.000000       0.081300       0.309000
53956     53956     shanxi         110.8333       35.4000           98       163     2012      12        06        341              0.095417       3.301941       0.615163       0.198345   -9999.000000   -9999.000000   -9999.000000       0.299000
53956     53956     shanxi         110.8333       35.4000           98       163     2012      12        07        342              0.096000       4.923431       0.000000       0.200867       0.106000       0.122400       0.058900   -9999.000000
53956     53956     shanxi         110.8333       35.4000           98       163     2012      12        08        343              0.091167       4.597900       0.000000       0.198446   -9999.000000   -9999.000000       0.047300       0.188000
53956     53956     shanxi         110.8333       35.4000           98       163     2012      12        09        344              0.086458       2.319763       0.000000       0.192713       0.119000       0.051300       0.066700   -9999.000000
53956     53956     shanxi         110.8333       35.4000           98       163     2012      12        10        345              0.084500       1.791534       0.000000       0.190686   -9999.000000   -9999.000000       0.067000       0.286000
53956     53956     shanxi         110.8333       35.4000           98       163     2012      12        11        346              0.080625       1.806488       0.184752       0.190760   -9999.000000   -9999.000000       0.066700       0.129000
53956     53956     shanxi         110.8333       35.4000           98       163     2012      12        12        347              0.082833       1.162445       0.000000       0.190183   -9999.000000       0.003600   -9999.000000   -9999.000000
53956     53956     shanxi         110.8333       35.4000           98       163     2012      12        13        348              0.088875       1.616943       0.000000       0.193219   -9999.000000   -9999.000000       0.021000       0.311000
53956     53956     shanxi         110.8333       35.4000           98       163     2012      12        14        349              0.093875       1.013702       0.000000       0.196681   -9999.000000       0.058100       0.066100   -9999.000000
53956     53956     shanxi         110.8333       35.4000           98       163     2012      12        15        350              0.000000       1.884949       0.000000       0.200289   -9999.000000   -9999.000000       0.067800       0.452000
53956     53956     shanxi         110.8333       35.4000           98       163     2012      12        16        351              0.096000       1.503479       0.000000       0.202950   -9999.000000   -9999.000000       0.084100   -9999.000000
53956     53956     shanxi         110.8333       35.4000           98       163     2012      12        17        352              0.095625       1.977142       0.000000       0.207272   -9999.000000       0.090900   -9999.000000       0.328000
53956     53956     shanxi         110.8333       35.4000           98       163     2012      12        18        353              0.092833       2.175385       0.000000       0.203669       0.104000   -9999.000000       0.057400       0.248000
53956     53956     shanxi         110.8333       35.4000           98       163     2012      12        19        354              0.093000       2.404724       0.000000       0.200412   -9999.000000       0.064100       0.012600   -9999.000000
53956     53956     shanxi         110.8333       35.4000           98       163     2012      12        20        355              0.000000       1.264435       0.000000       0.200426   -9999.000000   -9999.000000       0.054800       0.418000
53956     53956     shanxi         110.8333       35.4000           98       163     2012      12        21        356              0.089750      -0.509705       0.000000       0.193858   -9999.000000   -9999.000000       0.058900   -9999.000000
53956     53956     shanxi         110.8333       35.4000           98       163     2012      12        22        357              0.076458      -0.113129       0.000000       0.193669   -9999.000000       0.077000       0.064500       0.127000
53956     53956     shanxi         110.8333       35.4000           98       163     2012      12        23        358              0.068333      -2.127563       0.000000       0.183687   -9999.000000   -9999.000000   -9999.000000       0.063000
53956     53956     shanxi         110.8333       35.4000           98       163     2012      12        24        359              0.066722      -4.125763       0.000000       0.171460   -9999.000000   -9999.000000       0.048300       0.112000
53956     53956     shanxi         110.8333       35.4000           98       163     2012      12        25        360              0.067500      -1.788269       0.000000       0.182179   -9999.000000       0.065400       0.055400       0.145000
53956     53956     shanxi         110.8333       35.4000           98       163     2012      12        26        361              0.000000      -1.520477       0.000000       0.183416   -9999.000000   -9999.000000       0.054300   -9999.000000
53956     53956     shanxi         110.8333       35.4000           98       163     2012      12        27        362              0.069909      -1.599274       0.000000       0.183511   -9999.000000       0.090800       0.059100       0.097000
53956     53956     shanxi         110.8333       35.4000           98       163     2012      12        28        363              0.068000      -0.865082       0.000000       0.187035   -9999.000000   -9999.000000   -9999.000000       0.028000
53956     53956     shanxi         110.8333       35.4000           98       163     2012      12        29        364              0.000000      -0.796082       0.000000       0.189420   -9999.000000   -9999.000000   -9999.000000       0.193000
53956     53956     shanxi         110.8333       35.4000           98       163     2012      12        30        365              0.000000      -2.655548       0.000000       0.179221   -9999.000000       0.124700       0.010000       0.170000
53956     53956     shanxi         110.8333       35.4000           98       163     2012      12        31        366              0.068000      -1.966949       0.000000       0.180307   -9999.000000   -9999.000000       0.048700   -9999.000000
