# Supplementary material for: Research on Fusing Multisatellite Soil Moisture Data Based on Bayesian Model Averaging
Source: Hindawi journal article supplement (doi:10.1155/2018/9310838), 2018-06-25
Supplement: f1 [file 9310838.f1.zip › 2012_sm00-10cm_daily_ZDB_ZHY_53966_366days_allin.txt]

53966     53966     shanxi         111.8300       35.9619           96       167     2012      01        01        001              0.000000   -9999.000000       0.000000   -9999.000000   -9999.000000   -9999.000000       0.041300   -9999.000000
53966     53966     shanxi         111.8300       35.9619           96       167     2012      01        02        002              0.040250      -0.908203       0.000000       0.188774   -9999.000000   -9999.000000       0.058900       0.137000
53966     53966     shanxi         111.8300       35.9619           96       167     2012      01        03        003              0.000000      -0.778015       0.196921       0.191791   -9999.000000       0.040500   -9999.000000       0.066000
53966     53966     shanxi         111.8300       35.9619           96       167     2012      01        04        004              0.029208      -2.613464       0.389192       0.179161   -9999.000000       0.139800       0.038100   -9999.000000
53966     53966     shanxi         111.8300       35.9619           96       167     2012      01        05        005              0.029500      -3.417206       0.000000       0.173103   -9999.000000   -9999.000000       0.054700       0.242000
53966     53966     shanxi         111.8300       35.9619           96       167     2012      01        06        006              0.030958      -2.923004       0.000000       0.173145   -9999.000000   -9999.000000       0.051400   -9999.000000
53966     53966     shanxi         111.8300       35.9619           96       167     2012      01        07        007              0.033375      -0.898438       0.000000       0.186395   -9999.000000   -9999.000000       0.059100       0.118000
53966     53966     shanxi         111.8300       35.9619           96       167     2012      01        08        008              0.000000      -0.573517       0.000000       0.192412   -9999.000000   -9999.000000   -9999.000000   -9999.000000
53966     53966     shanxi         111.8300       35.9619           96       167     2012      01        09        009              0.034500      -0.257172       0.000000       0.194182   -9999.000000   -9999.000000   -9999.000000       0.002000
53966     53966     shanxi         111.8300       35.9619           96       167     2012      01        10        010              0.031458      -0.092102       0.000000       0.197115   -9999.000000   -9999.000000       0.023300       0.290000
53966     53966     shanxi         111.8300       35.9619           96       167     2012      01        11        011              0.029042       0.126221       0.000000       0.198309   -9999.000000   -9999.000000       0.039200   -9999.000000
53966     53966     shanxi         111.8300       35.9619           96       167     2012      01        12        012              0.029375      -0.464264       0.000000       0.192381   -9999.000000   -9999.000000       0.036500       0.124000
53966     53966     shanxi         111.8300       35.9619           96       167     2012      01        13        013              0.030125      -0.692017       0.000000       0.190124       0.086000       0.064500       0.040400   -9999.000000
53966     53966     shanxi         111.8300       35.9619           96       167     2012      01        14        014              0.028625       0.036438       0.000000       0.195303   -9999.000000   -9999.000000   -9999.000000       0.011000
53966     53966     shanxi         111.8300       35.9619           96       167     2012      01        15        015              0.030208      -0.386932       0.000000       0.193339   -9999.000000       0.048400       0.036200       0.025000
53966     53966     shanxi         111.8300       35.9619           96       167     2012      01        16        016              0.029000       0.197235       0.000000       0.195416   -9999.000000       0.037200       0.032500       0.043000
53966     53966     shanxi         111.8300       35.9619           96       167     2012      01        17        017              0.000000       0.059235       0.000000       0.196060   -9999.000000   -9999.000000       0.035900       0.101000
53966     53966     shanxi         111.8300       35.9619           96       167     2012      01        18        018              0.032958       0.631531       0.000000       0.202601   -9999.000000       0.095400       0.033300   -9999.000000
53966     53966     shanxi         111.8300       35.9619           96       167     2012      01        19        019              0.033292       1.021362       0.495450       0.205565   -9999.000000   -9999.000000       0.038400       0.041000
53966     53966     shanxi         111.8300       35.9619           96       167     2012      01        20        020              0.036250       1.541931       1.192656       0.211926   -9999.000000   -9999.000000   -9999.000000       0.570000
53966     53966     shanxi         111.8300       35.9619           96       167     2012      01        21        021              0.035250       0.107635       0.000000       0.211923   -9999.000000   -9999.000000       0.023300       0.199000
53966     53966     shanxi         111.8300       35.9619           96       167     2012      01        22        022              0.031250      -1.243927       0.000000       0.189770   -9999.000000       0.094100       0.033300       0.090000
53966     53966     shanxi         111.8300       35.9619           96       167     2012      01        23        023              0.026833      -2.294495       0.000000       0.179978   -9999.000000   -9999.000000       0.034000   -9999.000000
53966     53966     shanxi         111.8300       35.9619           96       167     2012      01        24        024              0.024000      -2.541168       0.000000       0.176431   -9999.000000   -9999.000000   -9999.000000       0.225000
53966     53966     shanxi         111.8300       35.9619           96       167     2012      01        25        025              0.022833      -3.222870       0.000000       0.173142   -9999.000000       0.055500   -9999.000000       0.293000
53966     53966     shanxi         111.8300       35.9619           96       167     2012      01        26        026              0.024000      -2.555328       0.000000       0.176332   -9999.000000   -9999.000000       0.037900       0.144000
53966     53966     shanxi         111.8300       35.9619           96       167     2012      01        27        027              0.026583      -1.055115       0.000000       0.186473       0.081000   -9999.000000       0.027700       0.098000
53966     53966     shanxi         111.8300       35.9619           96       167     2012      01        28        028              0.028458      -0.148346       0.000000       0.193593       0.099000       0.002700       0.037900   -9999.000000
53966     53966     shanxi         111.8300       35.9619           96       167     2012      01        29        029              0.030667       0.771332       0.000000       0.200047       0.094000   -9999.000000       0.038500       0.280000
53966     53966     shanxi         111.8300       35.9619           96       167     2012      01        30        030              0.029083       1.125519       0.000000       0.203651       0.093000   -9999.000000       0.039700   -9999.000000
53966     53966     shanxi         111.8300       35.9619           96       167     2012      01        31        031              0.032750       0.679138       0.000000       0.200421   -9999.000000       0.065600   -9999.000000       0.163000
53966     53966     shanxi         111.8300       35.9619           96       167     2012      02        01        032              0.026292       1.523376       0.000000       0.205642   -9999.000000   -9999.000000       0.029500       0.012000
53966     53966     shanxi         111.8300       35.9619           96       167     2012      02        02        033              0.025000       0.384491       0.000000       0.198391       0.083000       0.076400       0.031200   -9999.000000
53966     53966     shanxi         111.8300       35.9619           96       167     2012      02        03        034              0.028083      -0.279846       0.000000       0.190750       0.085000   -9999.000000       0.032100       0.299000
53966     53966     shanxi         111.8300       35.9619           96       167     2012      02        04        035              0.027083       0.890594       0.000000       0.195469   -9999.000000   -9999.000000       0.036500   -9999.000000
53966     53966     shanxi         111.8300       35.9619           96       167     2012      02        05        036              0.030500       1.307953       0.000000       0.202444   -9999.000000       0.076500       0.037000       0.153000
53966     53966     shanxi         111.8300       35.9619           96       167     2012      02        06        037              0.024333       1.808777       0.000000       0.206899   -9999.000000   -9999.000000   -9999.000000   -9999.000000
53966     53966     shanxi         111.8300       35.9619           96       167     2012      02        07        038              0.020167       0.004303       0.000000       0.193908       0.078000       0.063700       0.026300       0.029000
53966     53966     shanxi         111.8300       35.9619           96       167     2012      02        08        039              0.017250      -0.855927       0.000000       0.184356   -9999.000000   -9999.000000       0.038600       0.244000
53966     53966     shanxi         111.8300       35.9619           96       167     2012      02        09        040              0.019750      -2.650574       0.000000       0.172092   -9999.000000   -9999.000000       0.033900   -9999.000000
53966     53966     shanxi         111.8300       35.9619           96       167     2012      02        10        041              0.022500      -0.914703       0.000000       0.182941   -9999.000000       0.026500       0.039600       0.088000
53966     53966     shanxi         111.8300       35.9619           96       167     2012      02        11        042              0.028125       0.293915       0.000000       0.189770   -9999.000000   -9999.000000   -9999.000000   -9999.000000
53966     53966     shanxi         111.8300       35.9619           96       167     2012      02        12        043              0.028167       2.104431       0.000000       0.199442   -9999.000000   -9999.000000   -9999.000000       0.045000
53966     53966     shanxi         111.8300       35.9619           96       167     2012      02        13        044              0.027625       1.308014       0.000000       0.201420   -9999.000000       0.010700   -9999.000000       0.169000
53966     53966     shanxi         111.8300       35.9619           96       167     2012      02        14        045              0.031083       1.104706       0.000000       0.201001       0.082000   -9999.000000       0.040500       0.291000
53966     53966     shanxi         111.8300       35.9619           96       167     2012      02        15        046              0.031625       2.709564       0.000000       0.210629   -9999.000000   -9999.000000       0.036500       0.178000
53966     53966     shanxi         111.8300       35.9619           96       167     2012      02        16        047              0.026792       3.164398       0.000000       0.211336   -9999.000000   -9999.000000       0.040500   -9999.000000
53966     53966     shanxi         111.8300       35.9619           96       167     2012      02        17        048              0.022333       2.366425       0.000000       0.200776       0.069000   -9999.000000   -9999.000000       0.129000
53966     53966     shanxi         111.8300       35.9619           96       167     2012      02        18        049              0.022458       0.877350       0.000000       0.191978       0.081000       0.082500       0.030000       0.340000
53966     53966     shanxi         111.8300       35.9619           96       167     2012      02        19        050              0.027917       1.181580       0.000000       0.190747       0.076000   -9999.000000       0.038500       0.278000
53966     53966     shanxi         111.8300       35.9619           96       167     2012      02        20        051              0.037125       3.036957       0.000000       0.198834       0.083000       0.041100       0.034700       0.261000
53966     53966     shanxi         111.8300       35.9619           96       167     2012      02        21        052              0.047583       4.923645       0.000000       0.209802   -9999.000000   -9999.000000   -9999.000000   -9999.000000
53966     53966     shanxi         111.8300       35.9619           96       167     2012      02        22        053              0.059250       5.445068       0.000000       0.212518       0.064000   -9999.000000       0.040700       0.399000
53966     53966     shanxi         111.8300       35.9619           96       167     2012      02        23        054              0.065958       6.039764       0.000000       0.215541       0.072000   -9999.000000   -9999.000000       0.287000
53966     53966     shanxi         111.8300       35.9619           96       167     2012      02        24        055              0.067375       5.695648       0.000000       0.212814       0.080000   -9999.000000       0.025800       0.334000
53966     53966     shanxi         111.8300       35.9619           96       167     2012      02        25        056              0.062208       5.224487       0.943274       0.213389   -9999.000000   -9999.000000       0.036900       0.410000
53966     53966     shanxi         111.8300       35.9619           96       167     2012      02        26        057              0.061917       2.487549       0.000000       0.219141   -9999.000000       0.049500       0.037400   -9999.000000
53966     53966     shanxi         111.8300       35.9619           96       167     2012      02        27        058              0.061833       4.376892       0.000000       0.215840   -9999.000000   -9999.000000   -9999.000000       0.277000
53966     53966     shanxi         111.8300       35.9619           96       167     2012      02        28        059              0.064792       5.255829       0.000000       0.215797       0.072000       0.039500   -9999.000000       0.328000
53966     53966     shanxi         111.8300       35.9619           96       167     2012      02        29        060              0.000000   -9999.000000       0.000000   -9999.000000       0.079000   -9999.000000   -9999.000000   -9999.000000
53966     53966     shanxi         111.8300       35.9619           96       167     2012      03        01        061              0.080083       5.520264       1.624028       0.216706   -9999.000000   -9999.000000       0.032900       0.628000
53966     53966     shanxi         111.8300       35.9619           96       167     2012      03        02        062              0.089500       4.982605       0.000000       0.237210   -9999.000000       0.094800       0.039500   -9999.000000
53966     53966     shanxi         111.8300       35.9619           96       167     2012      03        03        063              0.087625       5.215881       0.000000       0.234801   -9999.000000   -9999.000000       0.040500       0.510000
53966     53966     shanxi         111.8300       35.9619           96       167     2012      03        04        064              0.085708       4.866943       0.000000       0.227762       0.091000   -9999.000000       0.046200   -9999.000000
53966     53966     shanxi         111.8300       35.9619           96       167     2012      03        05        065              0.086083       5.867889       0.000000       0.226326       0.104000   -9999.000000   -9999.000000       0.351000
53966     53966     shanxi         111.8300       35.9619           96       167     2012      03        06        066              0.082625       5.558655       0.000000       0.221210       0.099000   -9999.000000       0.026800   -9999.000000
53966     53966     shanxi         111.8300       35.9619           96       167     2012      03        07        067              0.000000       4.637634       0.000000       0.213939   -9999.000000   -9999.000000       0.040000       0.401000
53966     53966     shanxi         111.8300       35.9619           96       167     2012      03        08        068              0.087125       8.018890       0.000000       0.214260   -9999.000000   -9999.000000       0.035700       0.295000
53966     53966     shanxi         111.8300       35.9619           96       167     2012      03        09        069              0.089583       7.922028       0.000000       0.210437       0.084000       0.028000       0.042100   -9999.000000
53966     53966     shanxi         111.8300       35.9619           96       167     2012      03        10        070              0.095500       7.877563       0.000000       0.208112       0.094000   -9999.000000       0.039000       0.381000
53966     53966     shanxi         111.8300       35.9619           96       167     2012      03        11        071              0.102042       9.424805       0.000000       0.203825       0.091000   -9999.000000   -9999.000000   -9999.000000
53966     53966     shanxi         111.8300       35.9619           96       167     2012      03        12        072              0.104208       8.598907       0.000000       0.198340       0.095000       0.253100       0.020200       0.213000
53966     53966     shanxi         111.8300       35.9619           96       167     2012      03        13        073              0.105667       8.533752       0.000000       0.195404   -9999.000000   -9999.000000       0.037400       0.515000
53966     53966     shanxi         111.8300       35.9619           96       167     2012      03        14        074              0.107000      11.127258       0.000000       0.192137   -9999.000000       0.101200   -9999.000000       0.407000
53966     53966     shanxi         111.8300       35.9619           96       167     2012      03        15        075              0.109292      12.443542       1.179289       0.188586   -9999.000000       0.182400       0.050400       0.480000
53966     53966     shanxi         111.8300       35.9619           96       167     2012      03        16        076              0.110042       7.671478       0.000000       0.207448       0.090000   -9999.000000   -9999.000000   -9999.000000
53966     53966     shanxi         111.8300       35.9619           96       167     2012      03        17        077              0.108667      10.512146       0.000000       0.206848       0.086000       0.028800       0.031300       0.361000
53966     53966     shanxi         111.8300       35.9619           96       167     2012      03        18        078              0.107458      14.267609       0.947635       0.198849   -9999.000000   -9999.000000       0.036200       0.487000
53966     53966     shanxi         111.8300       35.9619           96       167     2012      03        19        079              0.107333      13.623840       0.000000       0.194860       0.107000   -9999.000000       0.054800       0.550000
53966     53966     shanxi         111.8300       35.9619           96       167     2012      03        20        080              0.106833       7.732239       0.000000       0.204785       0.088000       0.379000       0.043900       0.267000
53966     53966     shanxi         111.8300       35.9619           96       167     2012      03        21        081              0.113458      11.094788       6.328152       0.199699   -9999.000000   -9999.000000       0.073800   -9999.000000
53966     53966     shanxi         111.8300       35.9619           96       167     2012      03        22        082              0.141500       6.087860       0.185036       0.235920   -9999.000000       0.275500   -9999.000000       0.849000
53966     53966     shanxi         111.8300       35.9619           96       167     2012      03        23        083              0.131167       7.335052       0.000000       0.261925   -9999.000000   -9999.000000       0.036500       0.555000
53966     53966     shanxi         111.8300       35.9619           96       167     2012      03        24        084              0.122333       9.234253       0.000000       0.238567   -9999.000000   -9999.000000   -9999.000000       0.430000
53966     53966     shanxi         111.8300       35.9619           96       167     2012      03        25        085              0.000000      12.138702       0.000000       0.223829       0.083000   -9999.000000       0.044600       0.282000
53966     53966     shanxi         111.8300       35.9619           96       167     2012      03        26        086              0.114208      13.972412       0.000000       0.210679       0.100000   -9999.000000       0.060400   -9999.000000
53966     53966     shanxi         111.8300       35.9619           96       167     2012      03        27        087              0.112333      15.398315       0.000000       0.199746       0.091000       0.038900   -9999.000000       0.392000
53966     53966     shanxi         111.8300       35.9619           96       167     2012      03        28        088              0.112542      17.264404       2.145340       0.189496       0.094000   -9999.000000   -9999.000000   -9999.000000
53966     53966     shanxi         111.8300       35.9619           96       167     2012      03        29        089              0.116375      17.095612       0.000000       0.203970       0.107000   -9999.000000       0.042100       0.261000
53966     53966     shanxi         111.8300       35.9619           96       167     2012      03        30        090              0.110500      16.909882       0.000000       0.210987       0.090000   -9999.000000       0.059600       0.291000
53966     53966     shanxi         111.8300       35.9619           96       167     2012      03        31        091              0.107708      12.059387       0.000000       0.199910       0.085000   -9999.000000       0.051200   -9999.000000
53966     53966     shanxi         111.8300       35.9619           96       167     2012      04        01        092              0.105583      15.431976       0.000000       0.188338       0.107000       0.153800       0.055400       0.343000
53966     53966     shanxi         111.8300       35.9619           96       167     2012      04        02        093              0.103375      18.241333       0.137406       0.180696       0.105000   -9999.000000   -9999.000000   -9999.000000
53966     53966     shanxi         111.8300       35.9619           96       167     2012      04        03        094              0.103000      12.445435       0.000000       0.181294       0.114000       0.194900       0.055800       0.242000
53966     53966     shanxi         111.8300       35.9619           96       167     2012      04        04        095              0.101958      15.641357       0.000000       0.176796       0.106000       0.019100       0.049900   -9999.000000
53966     53966     shanxi         111.8300       35.9619           96       167     2012      04        05        096              0.100750      18.571533       0.000000       0.172087       0.103000   -9999.000000       0.061400       0.226000
53966     53966     shanxi         111.8300       35.9619           96       167     2012      04        06        097              0.099565      19.127991       0.000000       0.168850       0.105000   -9999.000000       0.055400       0.314000
53966     53966     shanxi         111.8300       35.9619           96       167     2012      04        07        098              0.098458      19.567200       0.000000       0.167102       0.102000       0.102600       0.060600   -9999.000000
53966     53966     shanxi         111.8300       35.9619           96       167     2012      04        08        099              0.097667      20.493134       0.000000       0.165864       0.110000   -9999.000000   -9999.000000       0.254000
53966     53966     shanxi         111.8300       35.9619           96       167     2012      04        09        100              0.096417      22.340820       2.662896       0.164460       0.140000       0.050700       0.068100   -9999.000000
53966     53966     shanxi         111.8300       35.9619           96       167     2012      04        10        101              0.097083      19.825409       0.082112       0.188555       0.113000   -9999.000000       0.085000       0.338000
53966     53966     shanxi         111.8300       35.9619           96       167     2012      04        11        102              0.098958      20.116913       9.455989       0.195631       0.123000   -9999.000000       0.067500       0.483000
53966     53966     shanxi         111.8300       35.9619           96       167     2012      04        12        103              0.104500      19.808533       0.572470       0.216801       0.145000       0.234500       0.081100       0.570000
53966     53966     shanxi         111.8300       35.9619           96       167     2012      04        13        104              0.101458      16.021057       0.000000       0.253312   -9999.000000   -9999.000000   -9999.000000       0.190000
53966     53966     shanxi         111.8300       35.9619           96       167     2012      04        14        105              0.099375      18.315582       0.000000       0.224447       0.128000       0.087500       0.080600   -9999.000000
53966     53966     shanxi         111.8300       35.9619           96       167     2012      04        15        106              0.098125      17.730988       0.000000       0.209290       0.104000   -9999.000000       0.052300       0.156000
53966     53966     shanxi         111.8300       35.9619           96       167     2012      04        16        107              0.097042      20.444092       0.000000       0.195171       0.123000   -9999.000000       0.085700       0.360000
53966     53966     shanxi         111.8300       35.9619           96       167     2012      04        17        108              0.094875      21.931763       0.000000       0.182286       0.117000       0.216400       0.081200       0.318000
53966     53966     shanxi         111.8300       35.9619           96       167     2012      04        18        109              0.094042      20.608185       0.000000       0.177909       0.123000   -9999.000000   -9999.000000       0.129000
53966     53966     shanxi         111.8300       35.9619           96       167     2012      04        19        110              0.092500      22.671875       1.654524       0.173175       0.117000       0.285200   -9999.000000   -9999.000000
53966     53966     shanxi         111.8300       35.9619           96       167     2012      04        20        111              0.096667      23.532928       0.000000       0.179050       0.126500   -9999.000000       0.083500       0.309000
53966     53966     shanxi         111.8300       35.9619           96       167     2012      04        21        112              0.100333      20.188110       0.000000       0.187522       0.118500       0.073700       0.075000       0.098000
53966     53966     shanxi         111.8300       35.9619           96       167     2012      04        22        113              0.096417      23.268585       0.214111       0.175553       0.109000       0.020100       0.085100       0.283000
53966     53966     shanxi         111.8300       35.9619           96       167     2012      04        23        114              0.095917      25.829987       1.017236       0.170142       0.121000   -9999.000000       0.089700       0.307000
53966     53966     shanxi         111.8300       35.9619           96       167     2012      04        24        115              0.155208      27.107880       0.221240       0.169073       0.181000   -9999.000000       0.133300   -9999.000000
53966     53966     shanxi         111.8300       35.9619           96       167     2012      04        25        116              0.000000      17.656464       0.000000       0.182672       0.151000       0.214700   -9999.000000       0.304000
53966     53966     shanxi         111.8300       35.9619           96       167     2012      04        26        117              0.117750      19.392792       0.075781       0.169493       0.122500   -9999.000000       0.081600   -9999.000000
53966     53966     shanxi         111.8300       35.9619           96       167     2012      04        27        118              0.108167      22.774231       0.000000       0.164188       0.120500       0.220400   -9999.000000       0.184000
53966     53966     shanxi         111.8300       35.9619           96       167     2012      04        28        119              0.100750      25.143341       0.198145       0.161511       0.110000   -9999.000000       0.090800       0.261000
53966     53966     shanxi         111.8300       35.9619           96       167     2012      04        29        120              0.093625      27.038605       0.000000       0.161428       0.136000       0.080000       0.098100   -9999.000000
53966     53966     shanxi         111.8300       35.9619           96       167     2012      04        30        121              0.087208      26.964386       0.075586       0.160342       0.132000       0.143300   -9999.000000       0.326000
53966     53966     shanxi         111.8300       35.9619           96       167     2012      05        01        122              0.083583      25.987671       0.323676       0.160348       0.159500   -9999.000000       0.096900   -9999.000000
53966     53966     shanxi         111.8300       35.9619           96       167     2012      05        02        123              0.079208      26.127441       1.050352       0.159811       0.167000       0.138200       0.066800       0.129000
53966     53966     shanxi         111.8300       35.9619           96       167     2012      05        03        124              0.072417      27.189545       0.000000       0.158713       0.144000   -9999.000000       0.091400   -9999.000000
53966     53966     shanxi         111.8300       35.9619           96       167     2012      05        04        125              0.067125      27.154907       0.000000       0.157365   -9999.000000   -9999.000000       0.081600       0.187000
53966     53966     shanxi         111.8300       35.9619           96       167     2012      05        05        126              0.062583      28.204346       0.000000       0.156235       0.167000   -9999.000000       0.086700       0.363000
53966     53966     shanxi         111.8300       35.9619           96       167     2012      05        06        127              0.058208      29.144775       0.791605       0.155819       0.115000   -9999.000000   -9999.000000   -9999.000000
53966     53966     shanxi         111.8300       35.9619           96       167     2012      05        07        128              0.055792      30.090820       0.525592       0.155116   -9999.000000       0.104900       0.093700       0.358000
53966     53966     shanxi         111.8300       35.9619           96       167     2012      05        08        129              0.055375      28.009827       0.629638       0.155939       0.131000   -9999.000000       0.097500   -9999.000000
53966     53966     shanxi         111.8300       35.9619           96       167     2012      05        09        130              0.054458      29.484314       0.000000       0.158039       0.153000   -9999.000000       0.103000       0.199000
53966     53966     shanxi         111.8300       35.9619           96       167     2012      05        10        131              0.053375      28.168610       0.000000       0.156939       0.158000   -9999.000000       0.097500       0.510000
53966     53966     shanxi         111.8300       35.9619           96       167     2012      05        11        132              0.063833      29.914337       4.480623       0.154207       0.232000   -9999.000000       0.115800       0.343000
53966     53966     shanxi         111.8300       35.9619           96       167     2012      05        12        133              0.080250      24.002808       1.366188       0.195634       0.166500       0.163000   -9999.000000       0.268000
53966     53966     shanxi         111.8300       35.9619           96       167     2012      05        13        134              0.074167      20.031311       0.000000       0.207044       0.156000       0.331800       0.079100   -9999.000000
53966     53966     shanxi         111.8300       35.9619           96       167     2012      05        14        135              0.065583      22.112274       1.267254       0.181955       0.161000       0.485100       0.116000       0.217000
53966     53966     shanxi         111.8300       35.9619           96       167     2012      05        15        136              0.057125      23.983612       1.843910       0.167849       0.179000       0.127800       0.106200       0.286000
53966     53966     shanxi         111.8300       35.9619           96       167     2012      05        16        137              0.051667      25.357086       0.399642       0.159993       0.173000   -9999.000000       0.113100       0.403000
53966     53966     shanxi         111.8300       35.9619           96       167     2012      05        17        138              0.048292      25.973724       0.000000       0.156773       0.153500       0.209700   -9999.000000       0.226000
53966     53966     shanxi         111.8300       35.9619           96       167     2012      05        18        139              0.046458      27.836700       0.000000       0.154803       0.173000       0.131600       0.115800   -9999.000000
53966     53966     shanxi         111.8300       35.9619           96       167     2012      05        19        140              0.045167      29.266296       0.000000       0.154228       0.152000   -9999.000000       0.089900       0.356000
53966     53966     shanxi         111.8300       35.9619           96       167     2012      05        20        141              0.042625      30.858673       0.149162       0.153581   -9999.000000   -9999.000000       0.107300       0.515000
53966     53966     shanxi         111.8300       35.9619           96       167     2012      05        21        142              0.040208      30.509247       1.997670       0.153131       0.244000   -9999.000000       0.102700       0.322000
53966     53966     shanxi         111.8300       35.9619           96       167     2012      05        22        143              0.044417      22.834534       0.255426       0.168049       0.170500   -9999.000000       0.117300       0.308000
53966     53966     shanxi         111.8300       35.9619           96       167     2012      05        23        144              0.045875      23.001160       3.586715       0.178089   -9999.000000       0.151300   -9999.000000   -9999.000000
53966     53966     shanxi         111.8300       35.9619           96       167     2012      05        24        145              0.047792      23.894592       0.000000       0.194265       0.167000   -9999.000000       0.104500       0.626000
53966     53966     shanxi         111.8300       35.9619           96       167     2012      05        25        146              0.000000      22.110687       0.000000       0.197684   -9999.000000       0.358400       0.117900   -9999.000000
53966     53966     shanxi         111.8300       35.9619           96       167     2012      05        26        147              0.043917      25.168549       2.475486       0.174423       0.182000       0.130200       0.103700       0.322000
53966     53966     shanxi         111.8300       35.9619           96       167     2012      05        27        148              0.042042      27.403259       0.000000       0.161986       0.153500   -9999.000000       0.110700       0.270000
53966     53966     shanxi         111.8300       35.9619           96       167     2012      05        28        149              0.041875      30.693787      13.873585       0.156103       0.158000   -9999.000000       0.109700   -9999.000000
53966     53966     shanxi         111.8300       35.9619           96       167     2012      05        29        150              0.082250      28.952148       3.676471       0.196251       0.213000   -9999.000000   -9999.000000       0.688000
53966     53966     shanxi         111.8300       35.9619           96       167     2012      05        30        151              0.071000      24.391724       0.000000       0.274065       0.164000       0.145100       0.091800   -9999.000000
53966     53966     shanxi         111.8300       35.9619           96       167     2012      05        31        152              0.055708      26.130463       0.239013       0.226442       0.183000       0.187400   -9999.000000   -9999.000000
53966     53966     shanxi         111.8300       35.9619           96       167     2012      06        01        153              0.048583      25.328430       5.475597       0.204783       0.154000   -9999.000000       0.105100   -9999.000000
53966     53966     shanxi         111.8300       35.9619           96       167     2012      06        02        154              0.044708      27.383484       0.398626       0.186934       0.137500       0.287300       0.111300       0.331000
53966     53966     shanxi         111.8300       35.9619           96       167     2012      06        03        155              0.042250      28.534180       0.000000       0.175050       0.133000   -9999.000000   -9999.000000       0.495000
53966     53966     shanxi         111.8300       35.9619           96       167     2012      06        04        156              0.040125      28.456268       0.210738       0.169721       0.133000       0.046800       0.112100   -9999.000000
53966     53966     shanxi         111.8300       35.9619           96       167     2012      06        05        157              0.038583      31.053345       2.286947       0.164943   -9999.000000       0.102500       0.101300       0.336000
53966     53966     shanxi         111.8300       35.9619           96       167     2012      06        06        158              0.042417      28.521240       0.000000       0.179852       0.166000   -9999.000000       0.118600   -9999.000000
53966     53966     shanxi         111.8300       35.9619           96       167     2012      06        07        159              0.042042      23.656799       0.930742       0.186941       0.128500   -9999.000000       0.104400       0.311000
53966     53966     shanxi         111.8300       35.9619           96       167     2012      06        08        160              0.039042      28.079346       0.000000       0.176644       0.139000   -9999.000000       0.111000       0.590000
53966     53966     shanxi         111.8300       35.9619           96       167     2012      06        09        161              0.038333      28.436493       1.388290       0.166430       0.125000   -9999.000000   -9999.000000       0.513000
53966     53966     shanxi         111.8300       35.9619           96       167     2012      06        10        162              0.035708      32.198822       1.157815       0.159245   -9999.000000       0.140400       0.093000       0.268000
53966     53966     shanxi         111.8300       35.9619           96       167     2012      06        11        163              0.000000      29.909821       2.705763       0.157022       0.106000   -9999.000000       0.105300   -9999.000000
53966     53966     shanxi         111.8300       35.9619           96       167     2012      06        12        164              0.032583      30.872009       0.515414       0.154697       0.101500       0.080400       0.095100       0.319000
53966     53966     shanxi         111.8300       35.9619           96       167     2012      06        13        165              0.031125      32.800232       0.121473       0.153703       0.111500   -9999.000000       0.097100       0.533000
53966     53966     shanxi         111.8300       35.9619           96       167     2012      06        14        166              0.028500      33.412750       0.188770       0.153708       0.114000   -9999.000000       0.100200       0.406000
53966     53966     shanxi         111.8300       35.9619           96       167     2012      06        15        167              0.027000      31.336884       2.253895       0.152889       0.125000   -9999.000000   -9999.000000       0.291000
53966     53966     shanxi         111.8300       35.9619           96       167     2012      06        16        168              0.026417      31.800415       0.000000       0.151983       0.119000   -9999.000000       0.078200   -9999.000000
53966     53966     shanxi         111.8300       35.9619           96       167     2012      06        17        169              0.026000      32.891388       0.453582       0.151418       0.112500   -9999.000000       0.111100       0.375000
53966     53966     shanxi         111.8300       35.9619           96       167     2012      06        18        170              0.025417      34.288879       2.922860       0.151226       0.108000       0.142400       0.082600       0.545000
53966     53966     shanxi         111.8300       35.9619           96       167     2012      06        19        171              0.025000      35.184052       0.247517       0.151047       0.129000   -9999.000000       0.089800       0.355000
53966     53966     shanxi         111.8300       35.9619           96       167     2012      06        20        172              0.025000      34.603424       1.117184       0.151252       0.106000       0.190900   -9999.000000       0.384000
53966     53966     shanxi         111.8300       35.9619           96       167     2012      06        21        173              0.039167      32.440186       0.475396       0.159116       0.139000   -9999.000000       0.084900   -9999.000000
53966     53966     shanxi         111.8300       35.9619           96       167     2012      06        22        174              0.041875      32.687866       0.445368       0.155923       0.126000   -9999.000000       0.078100       0.460000
53966     53966     shanxi         111.8300       35.9619           96       167     2012      06        23        175              0.035583      35.298401       1.740177       0.151926       0.121000       0.137600       0.077700   -9999.000000
53966     53966     shanxi         111.8300       35.9619           96       167     2012      06        24        176              0.059167      33.899414       9.164905       0.164753       0.180000   -9999.000000       0.114900       0.521000
53966     53966     shanxi         111.8300       35.9619           96       167     2012      06        25        177              0.049917      28.560242       0.887837       0.257779       0.173000       0.123800       0.127900       0.564000
53966     53966     shanxi         111.8300       35.9619           96       167     2012      06        26        178              0.044167      27.267883       0.440424       0.223620       0.163000   -9999.000000   -9999.000000   -9999.000000
53966     53966     shanxi         111.8300       35.9619           96       167     2012      06        27        179              0.039375      27.759857       0.138876       0.202865       0.170000   -9999.000000       0.096500       0.604000
53966     53966     shanxi         111.8300       35.9619           96       167     2012      06        28        180              0.047750      27.365814       9.835328       0.186733       0.172500       0.222600       0.140000   -9999.000000
53966     53966     shanxi         111.8300       35.9619           96       167     2012      06        29        181              0.138750      26.903534       8.287531       0.223158       0.184000   -9999.000000       0.134800       1.000000
53966     53966     shanxi         111.8300       35.9619           96       167     2012      06        30        182              0.109833      25.774261       0.331899       0.293078       0.136000   -9999.000000       0.126200   -9999.000000
53966     53966     shanxi         111.8300       35.9619           96       167     2012      07        01        183              0.075583      29.745880       1.998384       0.244639   -9999.000000       0.221600   -9999.000000       0.683000
53966     53966     shanxi         111.8300       35.9619           96       167     2012      07        02        184              0.051083      31.711487       0.581138       0.213020       0.151000   -9999.000000   -9999.000000       0.627000
53966     53966     shanxi         111.8300       35.9619           96       167     2012      07        03        185              0.042708      31.466187       0.352331       0.194578       0.121000       0.309300       0.056100   -9999.000000
53966     53966     shanxi         111.8300       35.9619           96       167     2012      07        04        186              0.039750      31.991852       0.435075       0.184774       0.151500   -9999.000000       0.078800       0.547000
53966     53966     shanxi         111.8300       35.9619           96       167     2012      07        05        187              0.038583      27.884766       0.340731       0.186110       0.138000       0.101900       0.070900   -9999.000000
53966     53966     shanxi         111.8300       35.9619           96       167     2012      07        06        188              0.036667      32.856720       0.300140       0.175850   -9999.000000       0.114900       0.075100       0.453000
53966     53966     shanxi         111.8300       35.9619           96       167     2012      07        07        189              0.036167      32.545044       0.508785       0.168989   -9999.000000   -9999.000000   -9999.000000       0.533000
53966     53966     shanxi         111.8300       35.9619           96       167     2012      07        08        190              0.093000      31.220062      26.165081       0.169590       0.227000       0.161200       0.097700       0.634000
53966     53966     shanxi         111.8300       35.9619           96       167     2012      07        09        191              0.191667      27.250916       7.512691       0.264519       0.201500   -9999.000000       0.122100       1.000000
53966     53966     shanxi         111.8300       35.9619           96       167     2012      07        10        192              0.155958      26.126312       0.325842       0.322070       0.177000       0.289800       0.120300   -9999.000000
53966     53966     shanxi         111.8300       35.9619           96       167     2012      07        11        193              0.119417      31.147186       0.217428       0.280985       0.160000       0.197800       0.113400       0.809000
53966     53966     shanxi         111.8300       35.9619           96       167     2012      07        12        194              0.084792      31.581268       0.150394       0.256915       0.144000       0.311200       0.110100       0.770000
53966     53966     shanxi         111.8300       35.9619           96       167     2012      07        13        195              0.105875      32.242767      10.297793       0.230687       0.204000       0.109400   -9999.000000       0.644000
53966     53966     shanxi         111.8300       35.9619           96       167     2012      07        14        196              0.117792      28.851868       2.239901       0.276992       0.170000   -9999.000000       0.095800       0.723000
53966     53966     shanxi         111.8300       35.9619           96       167     2012      07        15        197              0.093458      28.968567       0.138706       0.269100       0.177500   -9999.000000       0.119300   -9999.000000
53966     53966     shanxi         111.8300       35.9619           96       167     2012      07        16        198              0.074917      27.964478       0.264981       0.254884       0.159000       0.179400       0.124500       0.691000
53966     53966     shanxi         111.8300       35.9619           96       167     2012      07        17        199              0.143000      28.435486       0.260187       0.235821   -9999.000000   -9999.000000       0.126100       0.777000
53966     53966     shanxi         111.8300       35.9619           96       167     2012      07        18        200              0.193500      29.344788       0.897334       0.218605       0.151000       0.183100   -9999.000000       0.612000
53966     53966     shanxi         111.8300       35.9619           96       167     2012      07        19        201              0.187917      30.370148       0.295632       0.204094       0.138500       0.089500       0.111800       0.474000
53966     53966     shanxi         111.8300       35.9619           96       167     2012      07        20        202              0.185435      32.063965       3.265889       0.192415       0.142000       0.405100       0.097200   -9999.000000
53966     53966     shanxi         111.8300       35.9619           96       167     2012      07        21        203              0.189348      32.203522       7.179190       0.214710       0.169000   -9999.000000       0.133000       0.979000
53966     53966     shanxi         111.8300       35.9619           96       167     2012      07        22        204              0.189750      29.190857       1.180514       0.256136       0.159000   -9999.000000       0.112300   -9999.000000
53966     53966     shanxi         111.8300       35.9619           96       167     2012      07        23        205              0.185292      30.307556       3.751932       0.235883   -9999.000000       0.161700       0.114000       0.605000
53966     53966     shanxi         111.8300       35.9619           96       167     2012      07        24        206              0.182750      28.841156       0.454120       0.247153       0.169000       0.307800   -9999.000000       0.557000
53966     53966     shanxi         111.8300       35.9619           96       167     2012      07        25        207              0.182000      29.809052       0.794331       0.229274       0.157000   -9999.000000       0.102700   -9999.000000
53966     53966     shanxi         111.8300       35.9619           96       167     2012      07        26        208              0.181417      32.354340       4.960068       0.210053       0.163000       0.052700       0.104900       0.730000
53966     53966     shanxi         111.8300       35.9619           96       167     2012      07        27        209              0.178792      33.970612       3.323766       0.211084       0.153000   -9999.000000       0.108500   -9999.000000
53966     53966     shanxi         111.8300       35.9619           96       167     2012      07        28        210              0.177000      33.523285       0.061923       0.222101   -9999.000000       0.116700       0.104800       0.575000
53966     53966     shanxi         111.8300       35.9619           96       167     2012      07        29        211              0.184333      35.452484      12.503852       0.198832       0.163000       0.161500       0.080300   -9999.000000
53966     53966     shanxi         111.8300       35.9619           96       167     2012      07        30        212              0.216125      33.738068      57.354843       0.286692       0.176000   -9999.000000   -9999.000000       0.600000
53966     53966     shanxi         111.8300       35.9619           96       167     2012      07        31        213              0.294833      29.751617       6.528057       0.377186       0.237500   -9999.000000       0.113400       1.000000
53966     53966     shanxi         111.8300       35.9619           96       167     2012      08        01        214              0.280167      25.972443       0.111024       0.364797       0.226000   -9999.000000       0.126600   -9999.000000
53966     53966     shanxi         111.8300       35.9619           96       167     2012      08        02        215              0.264458      26.328979       2.778048       0.325119       0.205000       0.264800       0.120000       0.907000
53966     53966     shanxi         111.8300       35.9619           96       167     2012      08        03        216              0.245458      29.055511       0.000000       0.307654       0.215000       0.365200       0.118500   -9999.000000
53966     53966     shanxi         111.8300       35.9619           96       167     2012      08        04        217              0.222167      29.553192       0.426818       0.292425       0.214000   -9999.000000   -9999.000000       0.730000
53966     53966     shanxi         111.8300       35.9619           96       167     2012      08        05        218              0.232167      30.090179      11.588910       0.280750       0.193500       0.204200       0.118000       1.000000
53966     53966     shanxi         111.8300       35.9619           96       167     2012      08        06        219              0.215792      28.535858       0.000000       0.319692       0.183000   -9999.000000       0.127600       0.894000
53966     53966     shanxi         111.8300       35.9619           96       167     2012      08        07        220              0.197042      29.469849       0.000000       0.296035       0.164000   -9999.000000       0.131300       0.686000
53966     53966     shanxi         111.8300       35.9619           96       167     2012      08        08        221              0.189708      30.559692       5.671914       0.278198       0.209000       0.460700       0.131500   -9999.000000
53966     53966     shanxi         111.8300       35.9619           96       167     2012      08        09        222              0.192000      31.280548       5.569376       0.280839       0.201000   -9999.000000       0.168700       0.866000
53966     53966     shanxi         111.8300       35.9619           96       167     2012      08        10        223              0.187833      26.120148       0.000000       0.312279       0.166500       0.150500   -9999.000000       0.782000
53966     53966     shanxi         111.8300       35.9619           96       167     2012      08        11        224              0.185250      28.733490       0.705154       0.282270       0.183000       0.255700       0.130600       0.736000
53966     53966     shanxi         111.8300       35.9619           96       167     2012      08        12        225              0.183375      29.935181       0.429243       0.269072       0.191000       0.219400       0.138800       0.589000
53966     53966     shanxi         111.8300       35.9619           96       167     2012      08        13        226              0.182125      27.804138       8.999310       0.264624   -9999.000000       0.101700       0.133800   -9999.000000
53966     53966     shanxi         111.8300       35.9619           96       167     2012      08        14        227              0.258792      24.965485      18.442650       0.281827       0.244000   -9999.000000       0.162500       1.000000
53966     53966     shanxi         111.8300       35.9619           96       167     2012      08        15        228              0.254625      23.988190       0.540845       0.343497       0.188500   -9999.000000       0.145400       0.927000
53966     53966     shanxi         111.8300       35.9619           96       167     2012      08        16        229              0.228167      27.692261       0.000000       0.310370       0.182500       0.222900   -9999.000000       0.786000
53966     53966     shanxi         111.8300       35.9619           96       167     2012      08        17        230              0.244833      27.779388      58.045448       0.294942       0.194000   -9999.000000       0.110600       0.808000
53966     53966     shanxi         111.8300       35.9619           96       167     2012      08        18        231              0.365250      26.795685      14.021845       0.343972   -9999.000000       0.288600       0.155700   -9999.000000
53966     53966     shanxi         111.8300       35.9619           96       167     2012      08        19        232              0.330087      24.787659       0.164560       0.371541       0.230000   -9999.000000       0.152100       0.956000
53966     53966     shanxi         111.8300       35.9619           96       167     2012      08        20        233              0.314583      24.925262       0.314568       0.343832       0.219000       0.317300       0.216600   -9999.000000
53966     53966     shanxi         111.8300       35.9619           96       167     2012      08        21        234              0.295333      25.645447       0.000000       0.332903       0.163500       0.331700   -9999.000000       0.923000
53966     53966     shanxi         111.8300       35.9619           96       167     2012      08        22        235              0.272792      24.846375       0.000000       0.320257       0.165000   -9999.000000       0.180600   -9999.000000
53966     53966     shanxi         111.8300       35.9619           96       167     2012      08        23        236              0.249542      24.329529       0.000000       0.311429       0.151000       0.167100       0.161300   -9999.000000
53966     53966     shanxi         111.8300       35.9619           96       167     2012      08        24        237              0.233125      23.078979       0.000000       0.305217   -9999.000000   -9999.000000       0.196900       0.632000
53966     53966     shanxi         111.8300       35.9619           96       167     2012      08        25        238              0.000000      24.682831       0.000000       0.298904       0.188000       0.196800       0.176700   -9999.000000
53966     53966     shanxi         111.8300       35.9619           96       167     2012      08        26        239              0.213208      24.611115       0.000000       0.296627       0.152500       0.292300       0.183500       0.631000
53966     53966     shanxi         111.8300       35.9619           96       167     2012      08        27        240              0.206667      25.933990       9.902761       0.291536       0.166500   -9999.000000   -9999.000000   -9999.000000
53966     53966     shanxi         111.8300       35.9619           96       167     2012      08        28        241              0.201042      26.584412       1.449326       0.286709       0.144000       0.166100       0.125900       0.578000
53966     53966     shanxi         111.8300       35.9619           96       167     2012      08        29        242              0.194875      27.469086       0.000000       0.280905       0.151000       0.089400       0.147500       0.763000
53966     53966     shanxi         111.8300       35.9619           96       167     2012      08        30        243              0.189417      28.131744       0.000000       0.273049       0.168000   -9999.000000       0.133300   -9999.000000
53966     53966     shanxi         111.8300       35.9619           96       167     2012      08        31        244              0.187250      27.954987       4.680536       0.266354       0.226000   -9999.000000       0.170600       0.703000
53966     53966     shanxi         111.8300       35.9619           96       167     2012      09        01        245              0.229417      24.501465      31.375414       0.290546       0.236000   -9999.000000   -9999.000000   -9999.000000
53966     53966     shanxi         111.8300       35.9619           96       167     2012      09        02        246              0.253125      22.253021       0.000000       0.362466       0.196000   -9999.000000   -9999.000000       0.865000
53966     53966     shanxi         111.8300       35.9619           96       167     2012      09        03        247              0.246125      22.852448       1.710007       0.329019       0.172000       0.246000       0.127400       0.788000
53966     53966     shanxi         111.8300       35.9619           96       167     2012      09        04        248              0.241042      23.030060       0.465828       0.314340       0.188000       0.092900       0.172200       0.662000
53966     53966     shanxi         111.8300       35.9619           96       167     2012      09        05        249              0.236083      23.484589       0.338743       0.306124       0.207000       0.152800       0.144900       0.650000
53966     53966     shanxi         111.8300       35.9619           96       167     2012      09        06        250              0.234125      24.053528       6.017073       0.303195       0.205000   -9999.000000       0.181000   -9999.000000
53966     53966     shanxi         111.8300       35.9619           96       167     2012      09        07        251              0.243583      21.288300       0.147336       0.319863       0.201000       0.208800   -9999.000000       0.799000
53966     53966     shanxi         111.8300       35.9619           96       167     2012      09        08        252              0.241125      24.193207       0.721445       0.308989       0.187000       0.163500       0.156800       0.852000
53966     53966     shanxi         111.8300       35.9619           96       167     2012      09        09        253              0.240208      24.787048       0.000000       0.300853       0.171000   -9999.000000       0.141300       0.764000
53966     53966     shanxi         111.8300       35.9619           96       167     2012      09        10        254              0.270667      24.964020      21.335518       0.292036       0.260000       0.416400       0.175900       1.000000
53966     53966     shanxi         111.8300       35.9619           96       167     2012      09        11        255              0.298458      21.468719       0.306273       0.340787       0.172500   -9999.000000       0.167200   -9999.000000
53966     53966     shanxi         111.8300       35.9619           96       167     2012      09        12        256              0.278083      22.999908       0.000000       0.329595       0.170000   -9999.000000       0.166900       0.737000
53966     53966     shanxi         111.8300       35.9619           96       167     2012      09        13        257              0.270083      19.046112       0.000000       0.314999       0.153000       0.515300   -9999.000000       0.735000
53966     53966     shanxi         111.8300       35.9619           96       167     2012      09        14        258              0.263833      19.446777       0.000000       0.307024       0.145000   -9999.000000       0.125600       0.704000
53966     53966     shanxi         111.8300       35.9619           96       167     2012      09        15        259              0.256375      20.752930       0.000000       0.300804       0.163000       0.256500       0.157000       0.583000
53966     53966     shanxi         111.8300       35.9619           96       167     2012      09        16        260              0.250917      21.086182       0.000000       0.295592       0.167000       0.178200       0.134000   -9999.000000
53966     53966     shanxi         111.8300       35.9619           96       167     2012      09        17        261              0.245625      21.175262       0.382798       0.290723       0.146000   -9999.000000       0.127700       0.693000
53966     53966     shanxi         111.8300       35.9619           96       167     2012      09        18        262              0.242000      20.879333       0.507505       0.287446       0.162000       0.112400   -9999.000000   -9999.000000
53966     53966     shanxi         111.8300       35.9619           96       167     2012      09        19        263              0.239167      21.087189       0.289852       0.285978   -9999.000000   -9999.000000       0.131700       0.560000
53966     53966     shanxi         111.8300       35.9619           96       167     2012      09        20        264              0.235875      21.288116       2.393310       0.284027   -9999.000000       0.141800       0.127200       0.590000
53966     53966     shanxi         111.8300       35.9619           96       167     2012      09        21        265              0.242167      21.302368       1.836326       0.288995   -9999.000000       0.141700       0.146200   -9999.000000
53966     53966     shanxi         111.8300       35.9619           96       167     2012      09        22        266              0.246250      19.989838       0.000000       0.303356       0.144000       0.104000       0.123200       0.706000
53966     53966     shanxi         111.8300       35.9619           96       167     2012      09        23        267              0.242833      22.457611       0.000000       0.290004       0.154000       0.237600       0.133400   -9999.000000
53966     53966     shanxi         111.8300       35.9619           96       167     2012      09        24        268              0.239375      22.621246       0.000000       0.283673       0.143000   -9999.000000   -9999.000000       0.574000
53966     53966     shanxi         111.8300       35.9619           96       167     2012      09        25        269              0.237750      22.581177       4.770273       0.278613       0.172000       0.121600       0.191400   -9999.000000
53966     53966     shanxi         111.8300       35.9619           96       167     2012      09        26        270              0.243958      21.294556       0.094869       0.293058       0.178000       0.178800       0.183300       0.812000
53966     53966     shanxi         111.8300       35.9619           96       167     2012      09        27        271              0.246143      20.118317       0.000000       0.297880       0.157000       0.403100       0.178900       0.620000
53966     53966     shanxi         111.8300       35.9619           96       167     2012      09        28        272              0.236467      19.084381       0.000000       0.285344       0.138500   -9999.000000       0.175500   -9999.000000
53966     53966     shanxi         111.8300       35.9619           96       167     2012      09        29        273              0.235625      17.243134       0.000000       0.277227       0.140000   -9999.000000       0.172700       0.549000
53966     53966     shanxi         111.8300       35.9619           96       167     2012      09        30        274              0.232417      17.529388       0.000000       0.272807       0.136000   -9999.000000   -9999.000000   -9999.000000
53966     53966     shanxi         111.8300       35.9619           96       167     2012      10        01        275              0.228833      17.781158       0.000000       0.268387       0.126000       0.159100       0.089800       0.471000
53966     53966     shanxi         111.8300       35.9619           96       167     2012      10        02        276              0.225042      19.054504       0.000000       0.263764       0.127000   -9999.000000       0.112300       0.698000
53966     53966     shanxi         111.8300       35.9619           96       167     2012      10        03        277              0.221250      20.590546       0.000000       0.261069       0.111000       0.209400       0.101600       0.632000
53966     53966     shanxi         111.8300       35.9619           96       167     2012      10        04        278              0.218792      21.111298       3.605641       0.258013       0.150500       0.051400       0.137000       0.839000
53966     53966     shanxi         111.8300       35.9619           96       167     2012      10        05        279              0.220458      19.736725       0.000000       0.276230       0.131000       0.190700   -9999.000000   -9999.000000
53966     53966     shanxi         111.8300       35.9619           96       167     2012      10        06        280              0.219500      18.496063       0.000000       0.270489       0.136000   -9999.000000       0.116200       0.513000
53966     53966     shanxi         111.8300       35.9619           96       167     2012      10        07        281              0.216958      19.061615       0.000000       0.262856       0.134000   -9999.000000       0.094000       0.704000
53966     53966     shanxi         111.8300       35.9619           96       167     2012      10        08        282              0.215333      18.427032       0.000000       0.261689       0.129000   -9999.000000       0.112000       0.620000
53966     53966     shanxi         111.8300       35.9619           96       167     2012      10        09        283              0.211333      19.472137       0.000000       0.258660       0.113000       0.105200       0.097000       0.414000
53966     53966     shanxi         111.8300       35.9619           96       167     2012      10        10        284              0.208292      17.382538       0.000000       0.250522       0.117000   -9999.000000       0.109000   -9999.000000
53966     53966     shanxi         111.8300       35.9619           96       167     2012      10        11        285              0.204875      17.357452       0.000000       0.246285       0.096000       0.202500   -9999.000000       0.394000
53966     53966     shanxi         111.8300       35.9619           96       167     2012      10        12        286              0.200875      19.010956       0.000000       0.244013       0.103000   -9999.000000       0.092700       0.543000
53966     53966     shanxi         111.8300       35.9619           96       167     2012      10        13        287              0.198542      19.040375       0.000000       0.242694       0.106000       0.187600       0.110400       0.588000
53966     53966     shanxi         111.8300       35.9619           96       167     2012      10        14        288              0.195792      19.296936       0.000000       0.239404       0.098500       0.205800       0.095300       0.438000
53966     53966     shanxi         111.8300       35.9619           96       167     2012      10        15        289              0.192750      18.583771       3.716472       0.237123       0.117000       0.313700       0.092900   -9999.000000
53966     53966     shanxi         111.8300       35.9619           96       167     2012      10        16        290              0.190250      17.167542       1.042186       0.249632       0.109000       0.240100       0.091600       0.569000
53966     53966     shanxi         111.8300       35.9619           96       167     2012      10        17        291              0.190958      13.273651       0.000000       0.263350   -9999.000000   -9999.000000   -9999.000000   -9999.000000
53966     53966     shanxi         111.8300       35.9619           96       167     2012      10        18        292              0.192250      12.736053       0.536918       0.251608       0.111000       0.194300       0.070600       0.449000
53966     53966     shanxi         111.8300       35.9619           96       167     2012      10        19        293              0.190167      15.065186       0.000000       0.249561       0.096500       0.165200       0.090500       0.376000
53966     53966     shanxi         111.8300       35.9619           96       167     2012      10        20        294              0.191208      15.521393       0.000000       0.246892       0.106000   -9999.000000       0.081800   -9999.000000
53966     53966     shanxi         111.8300       35.9619           96       167     2012      10        21        295              0.191250      17.489410       5.260144       0.243229       0.146000       0.297500       0.117900       0.816000
53966     53966     shanxi         111.8300       35.9619           96       167     2012      10        22        296              0.198750      12.071228       0.000000       0.276868   -9999.000000   -9999.000000   -9999.000000   -9999.000000
53966     53966     shanxi         111.8300       35.9619           96       167     2012      10        23        297              0.198542      12.156860       0.000000       0.269113   -9999.000000   -9999.000000       0.077800       0.468000
53966     53966     shanxi         111.8300       35.9619           96       167     2012      10        24        298              0.200292      10.215240       0.000000       0.263597   -9999.000000   -9999.000000       0.065400   -9999.000000
53966     53966     shanxi         111.8300       35.9619           96       167     2012      10        25        299              0.000000      11.727386       0.000000       0.260182       0.112000   -9999.000000       0.082600       0.384000
53966     53966     shanxi         111.8300       35.9619           96       167     2012      10        26        300              0.198042      13.362885       0.000000       0.256876       0.122000       0.125300       0.078300       0.553000
53966     53966     shanxi         111.8300       35.9619           96       167     2012      10        27        301              0.198250      12.807770       0.000000       0.256500       0.108000       0.160100       0.084100   -9999.000000
53966     53966     shanxi         111.8300       35.9619           96       167     2012      10        28        302              0.000000      14.225952       0.000000       0.253187       0.132000   -9999.000000   -9999.000000       0.473000
53966     53966     shanxi         111.8300       35.9619           96       167     2012      10        29        303              0.193167      15.012848       0.000000       0.250786   -9999.000000       0.175000       0.067000   -9999.000000
53966     53966     shanxi         111.8300       35.9619           96       167     2012      10        30        304              0.189875      13.615234       0.000000       0.248625       0.099000   -9999.000000       0.086400       0.303000
53966     53966     shanxi         111.8300       35.9619           96       167     2012      10        31        305              0.189667      10.795624       0.000000       0.243292       0.125000   -9999.000000       0.075400       0.578000
53966     53966     shanxi         111.8300       35.9619           96       167     2012      11        01        306              0.188458      10.645355       0.000000       0.240689       0.113000       0.026500       0.086400       0.484000
53966     53966     shanxi         111.8300       35.9619           96       167     2012      11        02        307              0.189750      11.258911       1.152766       0.239766       0.121000   -9999.000000   -9999.000000       0.334000
53966     53966     shanxi         111.8300       35.9619           96       167     2012      11        03        308              0.200292      13.402557       0.000000       0.241944   -9999.000000       0.157300   -9999.000000   -9999.000000
53966     53966     shanxi         111.8300       35.9619           96       167     2012      11        04        309              0.199292       6.882385       0.000000       0.245863       0.144000   -9999.000000       0.063600       0.395000
53966     53966     shanxi         111.8300       35.9619           96       167     2012      11        05        310              0.202042       4.946838       0.000000       0.239063       0.128000   -9999.000000       0.077200       0.558000
53966     53966     shanxi         111.8300       35.9619           96       167     2012      11        06        311              0.206125       6.087921       0.000000       0.239652       0.132000       0.186300       0.075300       0.465000
53966     53966     shanxi         111.8300       35.9619           96       167     2012      11        07        312              0.204750       8.060455       0.082224       0.240421       0.132000   -9999.000000       0.085000       0.312000
53966     53966     shanxi         111.8300       35.9619           96       167     2012      11        08        313              0.206542       7.443451       0.000000       0.242099   -9999.000000       0.131600   -9999.000000   -9999.000000
53966     53966     shanxi         111.8300       35.9619           96       167     2012      11        09        314              0.204375       9.061798       1.955729       0.240872   -9999.000000   -9999.000000       0.082800       0.462000
53966     53966     shanxi         111.8300       35.9619           96       167     2012      11        10        315              0.209583       8.336456       0.113878       0.250797   -9999.000000   -9999.000000       0.072500       0.578000
53966     53966     shanxi         111.8300       35.9619           96       167     2012      11        11        316              0.208917       5.273651       0.000000       0.257146       0.142000   -9999.000000       0.077600       0.489000
53966     53966     shanxi         111.8300       35.9619           96       167     2012      11        12        317              0.210208       5.491241       0.000000       0.246558       0.129000   -9999.000000       0.069300       0.371000
53966     53966     shanxi         111.8300       35.9619           96       167     2012      11        13        318              0.000000       5.709320       0.000000       0.245803   -9999.000000       0.165200       0.077400   -9999.000000
53966     53966     shanxi         111.8300       35.9619           96       167     2012      11        14        319              0.214000       6.399902       0.000000       0.244136       0.138000       0.049700   -9999.000000       0.511000
53966     53966     shanxi         111.8300       35.9619           96       167     2012      11        15        320              0.212208       7.394958       0.610186       0.242572       0.138000       0.112800       0.057000   -9999.000000
53966     53966     shanxi         111.8300       35.9619           96       167     2012      11        16        321              0.212333       5.621185       0.000000       0.249530       0.145000       0.102700       0.071700       0.337000
53966     53966     shanxi         111.8300       35.9619           96       167     2012      11        17        322              0.000000       5.861755       0.196392       0.246567       0.128000   -9999.000000       0.067900       0.337000
53966     53966     shanxi         111.8300       35.9619           96       167     2012      11        18        323              0.213708       6.947571       0.000000       0.245008       0.131000       0.292500       0.076800   -9999.000000
53966     53966     shanxi         111.8300       35.9619           96       167     2012      11        19        324              0.214250       7.175140       0.711398       0.243928       0.141000       0.018900   -9999.000000       0.303000
53966     53966     shanxi         111.8300       35.9619           96       167     2012      11        20        325              0.212958       7.605743       0.098829       0.243947   -9999.000000       0.273900       0.075200   -9999.000000
53966     53966     shanxi         111.8300       35.9619           96       167     2012      11        21        326              0.213083       6.723877       0.000000       0.252876       0.104000       0.091700       0.050200       0.445000
53966     53966     shanxi         111.8300       35.9619           96       167     2012      11        22        327              0.211583       7.687683       0.000000       0.249783       0.121000   -9999.000000       0.067400   -9999.000000
53966     53966     shanxi         111.8300       35.9619           96       167     2012      11        23        328              0.208833       5.690369       0.000000       0.247006       0.113000       0.216800       0.061300       0.258000
53966     53966     shanxi         111.8300       35.9619           96       167     2012      11        24        329              0.209708       4.829102       0.000000       0.236538   -9999.000000       0.081600       0.071900       0.468000
53966     53966     shanxi         111.8300       35.9619           96       167     2012      11        25        330              0.207542       5.525543       0.000000       0.241337   -9999.000000   -9999.000000   -9999.000000   -9999.000000
53966     53966     shanxi         111.8300       35.9619           96       167     2012      11        26        331              0.203833       4.280090       0.000000       0.238297       0.091000       0.045800   -9999.000000       0.230000
53966     53966     shanxi         111.8300       35.9619           96       167     2012      11        27        332              0.204542       3.834930       0.000000       0.227897       0.110000   -9999.000000       0.060800   -9999.000000
53966     53966     shanxi         111.8300       35.9619           96       167     2012      11        28        333              0.199083       3.946655       0.000000       0.231436   -9999.000000   -9999.000000       0.052600       0.159000
53966     53966     shanxi         111.8300       35.9619           96       167     2012      11        29        334              0.194125       2.945404       0.000000       0.221878   -9999.000000       0.054200       0.062000       0.482000
53966     53966     shanxi         111.8300       35.9619           96       167     2012      11        30        335              0.199708       1.946472       0.323860       0.211819   -9999.000000   -9999.000000       0.063900       0.346000
53966     53966     shanxi         111.8300       35.9619           96       167     2012      12        01        336              0.203542       2.935883       1.295433       0.224871   -9999.000000       0.113600   -9999.000000       0.416000
53966     53966     shanxi         111.8300       35.9619           96       167     2012      12        02        337              0.202750       1.432526       0.000000       0.236905       0.111000       0.062700       0.040600   -9999.000000
53966     53966     shanxi         111.8300       35.9619           96       167     2012      12        03        338              0.192750       3.080963       0.000000       0.238743       0.119000   -9999.000000       0.067400       0.246000
53966     53966     shanxi         111.8300       35.9619           96       167     2012      12        04        339              0.192583       2.397705       0.000000       0.221013       0.106000       0.033400       0.059500       0.450000
53966     53966     shanxi         111.8300       35.9619           96       167     2012      12        05        340              0.184333       2.680603       0.000000       0.227357   -9999.000000   -9999.000000       0.063800       0.322000
53966     53966     shanxi         111.8300       35.9619           96       167     2012      12        06        341              0.186167       1.933228       0.000000       0.212784   -9999.000000       0.070800   -9999.000000       0.251000
53966     53966     shanxi         111.8300       35.9619           96       167     2012      12        07        342              0.184083       2.144379       0.000000       0.222866       0.095000       0.029500       0.053700   -9999.000000
53966     53966     shanxi         111.8300       35.9619           96       167     2012      12        08        343              0.174042       2.638245       0.000000       0.220306   -9999.000000       0.092100       0.043500       0.120000
53966     53966     shanxi         111.8300       35.9619           96       167     2012      12        09        344              0.172583       0.564423       0.000000       0.200871       0.109000       0.054500       0.068000       0.318000
53966     53966     shanxi         111.8300       35.9619           96       167     2012      12        10        345              0.170292       0.452240       0.000000       0.198110   -9999.000000   -9999.000000       0.044900       0.184000
53966     53966     shanxi         111.8300       35.9619           96       167     2012      12        11        346              0.168375       0.512329       0.000000       0.198622   -9999.000000       0.109400       0.052100       0.162000
53966     53966     shanxi         111.8300       35.9619           96       167     2012      12        12        347              0.169500       0.458160       0.000000       0.198385   -9999.000000       0.022200   -9999.000000   -9999.000000
53966     53966     shanxi         111.8300       35.9619           96       167     2012      12        13        348              0.171583       0.850983       0.371236       0.202892   -9999.000000   -9999.000000       0.036100       0.446000
53966     53966     shanxi         111.8300       35.9619           96       167     2012      12        14        349              0.173208       0.463440       0.000000       0.210090   -9999.000000       0.022900       0.052700   -9999.000000
53966     53966     shanxi         111.8300       35.9619           96       167     2012      12        15        350              0.000000       1.262756       0.000000       0.215366   -9999.000000   -9999.000000       0.050500       0.327000
53966     53966     shanxi         111.8300       35.9619           96       167     2012      12        16        351              0.180500       2.132385       0.000000       0.228118   -9999.000000   -9999.000000       0.059600       0.412000
53966     53966     shanxi         111.8300       35.9619           96       167     2012      12        17        352              0.182292       1.700806       0.000000       0.230705   -9999.000000       0.118000   -9999.000000   -9999.000000
53966     53966     shanxi         111.8300       35.9619           96       167     2012      12        18        353              0.176167       2.419586       0.000000       0.226587       0.090000   -9999.000000   -9999.000000       0.212000
53966     53966     shanxi         111.8300       35.9619           96       167     2012      12        19        354              0.172708       1.567169       2.405918       0.211723   -9999.000000       0.164600       0.038600   -9999.000000
53966     53966     shanxi         111.8300       35.9619           96       167     2012      12        20        355              0.000000       0.870422       3.073412       0.211001   -9999.000000       0.104100       0.058600       0.112000
53966     53966     shanxi         111.8300       35.9619           96       167     2012      12        21        356              0.170958      -0.089233       0.000000       0.207814   -9999.000000       0.100800       0.050700   -9999.000000
53966     53966     shanxi         111.8300       35.9619           96       167     2012      12        22        357              0.165667      -0.564606       0.000000       0.207648   -9999.000000       0.099600       0.057700       0.209000
53966     53966     shanxi         111.8300       35.9619           96       167     2012      12        23        358              0.159667      -3.005554       0.000000       0.176811   -9999.000000   -9999.000000   -9999.000000       0.088000
53966     53966     shanxi         111.8300       35.9619           96       167     2012      12        24        359              0.159059      -5.747040       0.000000       0.148723   -9999.000000       0.120100       0.043600   -9999.000000
53966     53966     shanxi         111.8300       35.9619           96       167     2012      12        25        360              0.160042      -3.947815       0.000000       0.160787   -9999.000000       0.020400       0.037400       0.099000
53966     53966     shanxi         111.8300       35.9619           96       167     2012      12        26        361              0.000000      -2.872284       0.000000       0.171763   -9999.000000       0.164800       0.048500   -9999.000000
53966     53966     shanxi         111.8300       35.9619           96       167     2012      12        27        362              0.162909      -2.412598       0.000000       0.171777   -9999.000000       0.031900       0.043400       0.067000
53966     53966     shanxi         111.8300       35.9619           96       167     2012      12        28        363              0.000000      -1.831665       0.000000       0.180823   -9999.000000   -9999.000000       0.053300       0.354000
53966     53966     shanxi         111.8300       35.9619           96       167     2012      12        29        364              0.000000      -1.856689       0.000000       0.177252   -9999.000000   -9999.000000   -9999.000000       0.101000
53966     53966     shanxi         111.8300       35.9619           96       167     2012      12        30        365              0.000000      -4.650421       0.000000       0.158375   -9999.000000       0.091500       0.031100       0.068000
53966     53966     shanxi         111.8300       35.9619           96       167     2012      12        31        366              0.157267      -3.566315       0.117234       0.168253   -9999.000000       0.306700       0.045000   -9999.000000
