# Supplementary material for: Research on Fusing Multisatellite Soil Moisture Data Based on Bayesian Model Averaging
Source: Hindawi journal article supplement (doi:10.1155/2018/9310838), 2018-06-25
Supplement: f1 [file 9310838.f1.zip › 2012_sm00-10cm_daily_ZDB_ZHY_53967_366days_allin.txt]

53967     53967     shanxi         111.1983       35.3842           98       165     2012      01        01        001              0.000000   -9999.000000       0.000000   -9999.000000       0.097000   -9999.000000       0.059100   -9999.000000
53967     53967     shanxi         111.1983       35.3842           98       165     2012      01        02        002              0.091208      -0.659302       0.000000       0.181799       0.113000       0.189500       0.068600       0.158000
53967     53967     shanxi         111.1983       35.3842           98       165     2012      01        03        003              0.000000       0.027252       0.134475       0.185884   -9999.000000       0.029800   -9999.000000   -9999.000000
53967     53967     shanxi         111.1983       35.3842           98       165     2012      01        04        004              0.061500      -1.871338       0.000000       0.177301   -9999.000000       0.052900       0.031900   -9999.000000
53967     53967     shanxi         111.1983       35.3842           98       165     2012      01        05        005              0.055500      -2.573334       0.000000       0.171936   -9999.000000       0.056400       0.068500       0.011000
53967     53967     shanxi         111.1983       35.3842           98       165     2012      01        06        006              0.056292      -2.410980       0.000000       0.172070       0.091000   -9999.000000       0.057800   -9999.000000
53967     53967     shanxi         111.1983       35.3842           98       165     2012      01        07        007              0.060417      -0.670746       0.000000       0.179589   -9999.000000   -9999.000000       0.073000       0.046000
53967     53967     shanxi         111.1983       35.3842           98       165     2012      01        08        008              0.000000      -0.444672       0.000000       0.181894       0.105000       0.088600   -9999.000000   -9999.000000
53967     53967     shanxi         111.1983       35.3842           98       165     2012      01        09        009              0.056167       0.102692       0.000000       0.183785   -9999.000000       0.158900   -9999.000000       0.026000
53967     53967     shanxi         111.1983       35.3842           98       165     2012      01        10        010              0.057000       0.213593       0.000000       0.184241   -9999.000000       0.055300       0.020700       0.054000
53967     53967     shanxi         111.1983       35.3842           98       165     2012      01        11        011              0.055375       0.503815       0.000000       0.185106       0.083000   -9999.000000       0.054100       0.067000
53967     53967     shanxi         111.1983       35.3842           98       165     2012      01        12        012              0.052292       0.303253       0.000000       0.183782       0.115000   -9999.000000       0.044000       0.107000
53967     53967     shanxi         111.1983       35.3842           98       165     2012      01        13        013              0.053417       0.241272       0.000000       0.183267       0.112000       0.043500       0.052000   -9999.000000
53967     53967     shanxi         111.1983       35.3842           98       165     2012      01        14        014              0.053667       0.646637       0.000000       0.184932       0.117000   -9999.000000   -9999.000000       0.115000
53967     53967     shanxi         111.1983       35.3842           98       165     2012      01        15        015              0.054208       0.153870       0.000000       0.183114   -9999.000000       0.036200       0.039100       0.126000
53967     53967     shanxi         111.1983       35.3842           98       165     2012      01        16        016              0.055042       0.988770       0.000000       0.186041       0.101000   -9999.000000       0.046200       0.003000
53967     53967     shanxi         111.1983       35.3842           98       165     2012      01        17        017              0.000000       0.674438       0.000000       0.186801       0.102000   -9999.000000       0.041000       0.041000
53967     53967     shanxi         111.1983       35.3842           98       165     2012      01        18        018              0.057417       0.970764       0.000000       0.188979       0.113000       0.028700       0.045000   -9999.000000
53967     53967     shanxi         111.1983       35.3842           98       165     2012      01        19        019              0.061333       1.730408       0.304623       0.190001       0.122000   -9999.000000       0.049400       0.082000
53967     53967     shanxi         111.1983       35.3842           98       165     2012      01        20        020              0.064792       1.779907       0.000000       0.192814   -9999.000000       0.082300   -9999.000000       0.181000
53967     53967     shanxi         111.1983       35.3842           98       165     2012      01        21        021              0.055417       1.015930       0.000000       0.192619   -9999.000000   -9999.000000       0.013200       0.188000
53967     53967     shanxi         111.1983       35.3842           98       165     2012      01        22        022              0.050833      -1.086060       0.124497       0.182213   -9999.000000       0.129900       0.043500       0.124000
53967     53967     shanxi         111.1983       35.3842           98       165     2012      01        23        023              0.042125      -2.092285       0.000000       0.175738   -9999.000000       0.045100       0.046200   -9999.000000
53967     53967     shanxi         111.1983       35.3842           98       165     2012      01        24        024              0.039500      -2.403625       0.000000       0.172470   -9999.000000   -9999.000000   -9999.000000       0.044000
53967     53967     shanxi         111.1983       35.3842           98       165     2012      01        25        025              0.039542      -2.630737       0.000000       0.171145   -9999.000000       0.070600   -9999.000000       0.063000
53967     53967     shanxi         111.1983       35.3842           98       165     2012      01        26        026              0.040000      -1.692139       0.000000       0.174261   -9999.000000       0.060200       0.056500       0.120000
53967     53967     shanxi         111.1983       35.3842           98       165     2012      01        27        027              0.043000      -0.560547       0.461067       0.178927       0.091000   -9999.000000       0.026800       0.011000
53967     53967     shanxi         111.1983       35.3842           98       165     2012      01        28        028              0.047250       0.326508       0.000000       0.182915       0.115000       0.030500       0.058000   -9999.000000
53967     53967     shanxi         111.1983       35.3842           98       165     2012      01        29        029              0.049833       1.361328       0.000000       0.186350       0.114000   -9999.000000       0.051900       0.013000
53967     53967     shanxi         111.1983       35.3842           98       165     2012      01        30        030              0.047833       1.823486       0.000000       0.188079   -9999.000000   -9999.000000       0.051600   -9999.000000
53967     53967     shanxi         111.1983       35.3842           98       165     2012      01        31        031              0.050375       1.832336       0.000000       0.188149   -9999.000000   -9999.000000   -9999.000000       0.179000
53967     53967     shanxi         111.1983       35.3842           98       165     2012      02        01        032              0.052625       3.024353       0.000000       0.190423   -9999.000000   -9999.000000       0.031600   -9999.000000
53967     53967     shanxi         111.1983       35.3842           98       165     2012      02        02        033              0.049292       1.332581       0.000000       0.183565       0.100000       0.004700       0.049300   -9999.000000
53967     53967     shanxi         111.1983       35.3842           98       165     2012      02        03        034              0.051292       0.532440       2.230443       0.179433       0.101000   -9999.000000       0.039700       0.030000
53967     53967     shanxi         111.1983       35.3842           98       165     2012      02        04        035              0.049917       1.602692       0.000000       0.180489       0.113000   -9999.000000       0.052800   -9999.000000
53967     53967     shanxi         111.1983       35.3842           98       165     2012      02        05        036              0.053583       1.007599       0.000000       0.180504   -9999.000000       0.084000       0.050800       0.096000
53967     53967     shanxi         111.1983       35.3842           98       165     2012      02        06        037              0.050083       2.377380       0.000000       0.184181   -9999.000000   -9999.000000   -9999.000000   -9999.000000
53967     53967     shanxi         111.1983       35.3842           98       165     2012      02        07        038              0.044833       0.365936       0.000000       0.177518   -9999.000000       0.219700       0.014300       0.020000
53967     53967     shanxi         111.1983       35.3842           98       165     2012      02        08        039              0.042750      -0.612213       0.000000       0.172250   -9999.000000   -9999.000000       0.053300       0.046000
53967     53967     shanxi         111.1983       35.3842           98       165     2012      02        09        040              0.047500      -2.121063       0.000000       0.167882       0.110000       0.076500       0.045100   -9999.000000
53967     53967     shanxi         111.1983       35.3842           98       165     2012      02        10        041              0.053792      -0.256195       0.000000       0.172459   -9999.000000       0.073800       0.054000       0.069000
53967     53967     shanxi         111.1983       35.3842           98       165     2012      02        11        042              0.063333       1.016205       0.000000       0.174167   -9999.000000   -9999.000000   -9999.000000   -9999.000000
53967     53967     shanxi         111.1983       35.3842           98       165     2012      02        12        043              0.074542       3.040802       0.000000       0.178842   -9999.000000   -9999.000000   -9999.000000       0.119000
53967     53967     shanxi         111.1983       35.3842           98       165     2012      02        13        044              0.070167       1.882416       0.000000       0.178307   -9999.000000       0.029800   -9999.000000       0.107000
53967     53967     shanxi         111.1983       35.3842           98       165     2012      02        14        045              0.069750       1.926910       0.033811       0.178663       0.098000   -9999.000000       0.054400       0.217000
53967     53967     shanxi         111.1983       35.3842           98       165     2012      02        15        046              0.080042       3.335663       0.000000       0.182021   -9999.000000   -9999.000000       0.048000       0.087000
53967     53967     shanxi         111.1983       35.3842           98       165     2012      02        16        047              0.078500       3.605957       0.000000       0.181857   -9999.000000   -9999.000000       0.049600   -9999.000000
53967     53967     shanxi         111.1983       35.3842           98       165     2012      02        17        048              0.074042       3.187500       0.000000       0.177561       0.064000   -9999.000000   -9999.000000       0.184000
53967     53967     shanxi         111.1983       35.3842           98       165     2012      02        18        049              0.070208       2.033600       0.000000       0.173580       0.092000       0.024200       0.028200       0.028000
53967     53967     shanxi         111.1983       35.3842           98       165     2012      02        19        050              0.075708       2.020081       0.000000       0.171678       0.093000   -9999.000000       0.052600       0.195000
53967     53967     shanxi         111.1983       35.3842           98       165     2012      02        20        051              0.099292       4.127197       0.000000       0.173885   -9999.000000       0.053500       0.041700       0.113000
53967     53967     shanxi         111.1983       35.3842           98       165     2012      02        21        052              0.103333       5.858337       0.000000       0.175190   -9999.000000   -9999.000000   -9999.000000   -9999.000000
53967     53967     shanxi         111.1983       35.3842           98       165     2012      02        22        053              0.110250       5.730011       0.000000       0.176030       0.088000       0.328300   -9999.000000       0.122000
53967     53967     shanxi         111.1983       35.3842           98       165     2012      02        23        054              0.113458       7.301483       1.020178       0.176247       0.084000       0.081200   -9999.000000       0.204000
53967     53967     shanxi         111.1983       35.3842           98       165     2012      02        24        055              0.116583       5.068207       0.000000       0.175090       0.100000   -9999.000000       0.016300       0.220000
53967     53967     shanxi         111.1983       35.3842           98       165     2012      02        25        056              0.120792       5.662750       0.000000       0.175730       0.108000       0.112300       0.053000       0.190000
53967     53967     shanxi         111.1983       35.3842           98       165     2012      02        26        057              0.124792       3.338165       0.000000       0.175932   -9999.000000   -9999.000000       0.047600   -9999.000000
53967     53967     shanxi         111.1983       35.3842           98       165     2012      02        27        058              0.129958       4.930481       0.000000       0.176134   -9999.000000       0.153800   -9999.000000       0.226000
53967     53967     shanxi         111.1983       35.3842           98       165     2012      02        28        059              0.133208       5.627716       0.000000       0.175877       0.090000       0.085100   -9999.000000   -9999.000000
53967     53967     shanxi         111.1983       35.3842           98       165     2012      02        29        060              0.000000   -9999.000000       0.000000   -9999.000000       0.096000   -9999.000000   -9999.000000   -9999.000000
53967     53967     shanxi         111.1983       35.3842           98       165     2012      03        01        061              0.136792       5.727264       0.472237       0.175587   -9999.000000   -9999.000000       0.037600   -9999.000000
53967     53967     shanxi         111.1983       35.3842           98       165     2012      03        02        062              0.136833       4.909485       0.000000       0.184641   -9999.000000       0.087800       0.057600   -9999.000000
53967     53967     shanxi         111.1983       35.3842           98       165     2012      03        03        063              0.133917       5.085938       0.000000       0.185035   -9999.000000   -9999.000000       0.046200       0.191000
53967     53967     shanxi         111.1983       35.3842           98       165     2012      03        04        064              0.131917       4.201721       0.027715       0.183541       0.103000       0.072200       0.054200   -9999.000000
53967     53967     shanxi         111.1983       35.3842           98       165     2012      03        05        065              0.131500       4.574646       0.926156       0.182694       0.116000   -9999.000000   -9999.000000       0.285000
53967     53967     shanxi         111.1983       35.3842           98       165     2012      03        06        066              0.129583       5.940948       0.000000       0.181353       0.110000       0.111400       0.028400   -9999.000000
53967     53967     shanxi         111.1983       35.3842           98       165     2012      03        07        067              0.000000       4.247528       0.043324       0.178272   -9999.000000       0.058900       0.057100       0.308000
53967     53967     shanxi         111.1983       35.3842           98       165     2012      03        08        068              0.128750       7.814087       0.269548       0.176164   -9999.000000   -9999.000000       0.044400       0.186000
53967     53967     shanxi         111.1983       35.3842           98       165     2012      03        09        069              0.128625       7.528778       1.974583       0.174389       0.082000       0.061200       0.051600   -9999.000000
53967     53967     shanxi         111.1983       35.3842           98       165     2012      03        10        070              0.128875       8.323792       0.000000       0.173014       0.110000   -9999.000000   -9999.000000       0.255000
53967     53967     shanxi         111.1983       35.3842           98       165     2012      03        11        071              0.128000      10.221619       0.000000       0.171021       0.104000   -9999.000000   -9999.000000   -9999.000000
53967     53967     shanxi         111.1983       35.3842           98       165     2012      03        12        072              0.126833       8.516602       0.000000       0.168614       0.113000       0.149500       0.013800       0.243000
53967     53967     shanxi         111.1983       35.3842           98       165     2012      03        13        073              0.128125       8.532410       0.000000       0.167933   -9999.000000   -9999.000000       0.051800       0.148000
53967     53967     shanxi         111.1983       35.3842           98       165     2012      03        14        074              0.126917      12.005707       0.398864       0.166892       0.096500   -9999.000000   -9999.000000       0.257000
53967     53967     shanxi         111.1983       35.3842           98       165     2012      03        15        075              0.127583      12.096832       1.788286       0.167360   -9999.000000   -9999.000000       0.075100       0.529000
53967     53967     shanxi         111.1983       35.3842           98       165     2012      03        16        076              0.128750       7.249481       0.000000       0.204483       0.108000   -9999.000000   -9999.000000   -9999.000000
53967     53967     shanxi         111.1983       35.3842           98       165     2012      03        17        077              0.130583      11.436218       0.000000       0.197740       0.111000   -9999.000000       0.043700       0.416000
53967     53967     shanxi         111.1983       35.3842           98       165     2012      03        18        078              0.129292      14.973755       0.884688       0.186623   -9999.000000   -9999.000000       0.046100       0.135000
53967     53967     shanxi         111.1983       35.3842           98       165     2012      03        19        079              0.126750      12.721436       0.000000       0.183949       0.118000   -9999.000000       0.079200       0.320000
53967     53967     shanxi         111.1983       35.3842           98       165     2012      03        20        080              0.126667       7.005890       0.365446       0.190225       0.102000       0.083700       0.058100       0.135000
53967     53967     shanxi         111.1983       35.3842           98       165     2012      03        21        081              0.171917       9.874756      11.311403       0.186420   -9999.000000       0.161800       0.115600   -9999.000000
53967     53967     shanxi         111.1983       35.3842           98       165     2012      03        22        082              0.164083       4.946411       0.487777       0.285091       0.192000       0.095600   -9999.000000       0.833000
53967     53967     shanxi         111.1983       35.3842           98       165     2012      03        23        083              0.150958       7.964142       1.323755       0.269968   -9999.000000   -9999.000000       0.048100       0.332000
53967     53967     shanxi         111.1983       35.3842           98       165     2012      03        24        084              0.146750       9.950775       1.100368       0.248274   -9999.000000   -9999.000000   -9999.000000       0.405000
53967     53967     shanxi         111.1983       35.3842           98       165     2012      03        25        085              0.000000      12.800110       0.000000       0.231727       0.114500       0.130700       0.060500       0.153000
53967     53967     shanxi         111.1983       35.3842           98       165     2012      03        26        086              0.144167      14.452759       0.000000       0.217479       0.123500   -9999.000000       0.086600   -9999.000000
53967     53967     shanxi         111.1983       35.3842           98       165     2012      03        27        087              0.145292      15.165955       1.123460       0.206947       0.118000       0.067900   -9999.000000       0.228000
53967     53967     shanxi         111.1983       35.3842           98       165     2012      03        28        088              0.146583      17.459747       4.511634       0.195867   -9999.000000   -9999.000000       0.109200   -9999.000000
53967     53967     shanxi         111.1983       35.3842           98       165     2012      03        29        089              0.147708      16.567657       0.000000       0.225705       0.134000   -9999.000000       0.046000       0.324000
53967     53967     shanxi         111.1983       35.3842           98       165     2012      03        30        090              0.142542      16.826019       0.115734       0.236756       0.098000       0.082300       0.088800   -9999.000000
53967     53967     shanxi         111.1983       35.3842           98       165     2012      03        31        091              0.142875      12.994415       0.000000       0.219660       0.111500   -9999.000000       0.067200   -9999.000000
53967     53967     shanxi         111.1983       35.3842           98       165     2012      04        01        092              0.143917      15.956543       0.094810       0.202452       0.148000       0.156900       0.077000       0.116000
53967     53967     shanxi         111.1983       35.3842           98       165     2012      04        02        093              0.139375      18.715088       0.172432       0.190733       0.153000   -9999.000000   -9999.000000   -9999.000000
53967     53967     shanxi         111.1983       35.3842           98       165     2012      04        03        094              0.139500      13.668823       0.000000       0.189495       0.138000   -9999.000000       0.065700       0.127000
53967     53967     shanxi         111.1983       35.3842           98       165     2012      04        04        095              0.140125      16.034668       0.000000       0.181704       0.123000       0.185800       0.059400   -9999.000000
53967     53967     shanxi         111.1983       35.3842           98       165     2012      04        05        096              0.139208      19.210388       0.000000       0.175083       0.126500   -9999.000000       0.077700       0.207000
53967     53967     shanxi         111.1983       35.3842           98       165     2012      04        06        097              0.137667      18.720673       0.000000       0.171167       0.125000   -9999.000000       0.070200       0.085000
53967     53967     shanxi         111.1983       35.3842           98       165     2012      04        07        098              0.137542      19.465607       0.000000       0.168738       0.136000       0.154500       0.073000   -9999.000000
53967     53967     shanxi         111.1983       35.3842           98       165     2012      04        08        099              0.138750      20.671875       0.000000       0.166868       0.135000       0.134300   -9999.000000       0.154000
53967     53967     shanxi         111.1983       35.3842           98       165     2012      04        09        100              0.138333      22.825134       0.573514       0.164940   -9999.000000       0.040600       0.047300   -9999.000000
53967     53967     shanxi         111.1983       35.3842           98       165     2012      04        10        101              0.140083      19.778381       0.113250       0.168444       0.126000   -9999.000000       0.084200       0.277000
53967     53967     shanxi         111.1983       35.3842           98       165     2012      04        11        102              0.145083      19.961517      10.961456       0.173676       0.188000   -9999.000000       0.059000       0.278000
53967     53967     shanxi         111.1983       35.3842           98       165     2012      04        12        103              0.152208      20.266541       0.343566       0.211178       0.166000   -9999.000000       0.081700       0.465000
53967     53967     shanxi         111.1983       35.3842           98       165     2012      04        13        104              0.146708      14.883575       0.000000       0.263023   -9999.000000   -9999.000000   -9999.000000       0.103000
53967     53967     shanxi         111.1983       35.3842           98       165     2012      04        14        105              0.143875      18.551666       0.465661       0.230777       0.152000       0.052400       0.076300   -9999.000000
53967     53967     shanxi         111.1983       35.3842           98       165     2012      04        15        106              0.143250      17.635803       0.000000       0.219484       0.130500   -9999.000000       0.034300       0.196000
53967     53967     shanxi         111.1983       35.3842           98       165     2012      04        16        107              0.142292      20.751160       0.000000       0.202942       0.139500       0.104200       0.102300       0.075000
53967     53967     shanxi         111.1983       35.3842           98       165     2012      04        17        108              0.139667      21.360992       0.000000       0.188682       0.141000       0.045100       0.085500       0.122000
53967     53967     shanxi         111.1983       35.3842           98       165     2012      04        18        109              0.142083      20.160309       0.000000       0.183140   -9999.000000   -9999.000000   -9999.000000       0.063000
53967     53967     shanxi         111.1983       35.3842           98       165     2012      04        19        110              0.143208      22.474274       3.418348       0.176659       0.138000       0.150700   -9999.000000   -9999.000000
53967     53967     shanxi         111.1983       35.3842           98       165     2012      04        20        111              0.142083      23.767151       0.054575       0.190013       0.147000   -9999.000000       0.089400       0.289000
53967     53967     shanxi         111.1983       35.3842           98       165     2012      04        21        112              0.144583      19.788239       0.000000       0.209098       0.147000   -9999.000000       0.086500       0.153000
53967     53967     shanxi         111.1983       35.3842           98       165     2012      04        22        113              0.143583      23.270844       0.000000       0.189903       0.150000       0.271900       0.101600       0.071000
53967     53967     shanxi         111.1983       35.3842           98       165     2012      04        23        114              0.140542      26.156738       0.181006       0.176788       0.155000   -9999.000000       0.101600       0.091000
53967     53967     shanxi         111.1983       35.3842           98       165     2012      04        24        115              0.134125      26.244019       0.732813       0.171865       0.213000   -9999.000000       0.129300   -9999.000000
53967     53967     shanxi         111.1983       35.3842           98       165     2012      04        25        116              0.000000      18.723236       0.000000       0.181196       0.176000       0.173900   -9999.000000       0.015000
53967     53967     shanxi         111.1983       35.3842           98       165     2012      04        26        117              0.131833      20.333984       0.000000       0.170389       0.144000   -9999.000000       0.057200   -9999.000000
53967     53967     shanxi         111.1983       35.3842           98       165     2012      04        27        118              0.129542      23.372803       0.000000       0.165148       0.125000       0.148200   -9999.000000       0.112000
53967     53967     shanxi         111.1983       35.3842           98       165     2012      04        28        119              0.126250      26.004639       0.000000       0.162045       0.145000   -9999.000000       0.085200   -9999.000000
53967     53967     shanxi         111.1983       35.3842           98       165     2012      04        29        120              0.122042      26.406891       0.000000       0.160712       0.148000   -9999.000000       0.098200   -9999.000000
53967     53967     shanxi         111.1983       35.3842           98       165     2012      04        30        121              0.115000      26.359070       0.268132       0.159922       0.168000       0.113400   -9999.000000       0.335000
53967     53967     shanxi         111.1983       35.3842           98       165     2012      05        01        122              0.117208      23.672028       2.124194       0.163019       0.179000   -9999.000000       0.096000   -9999.000000
53967     53967     shanxi         111.1983       35.3842           98       165     2012      05        02        123              0.114958      24.792755       0.360395       0.162007       0.177000       0.130700       0.049700       0.193000
53967     53967     shanxi         111.1983       35.3842           98       165     2012      05        03        124              0.108833      27.148438       0.000000       0.159361       0.177000   -9999.000000       0.096000   -9999.000000
53967     53967     shanxi         111.1983       35.3842           98       165     2012      05        04        125              0.104000      26.530304       0.000000       0.157508   -9999.000000   -9999.000000       0.079300       0.148000
53967     53967     shanxi         111.1983       35.3842           98       165     2012      05        05        126              0.099500      28.510437       0.000000       0.155952       0.177000   -9999.000000       0.087500       0.153000
53967     53967     shanxi         111.1983       35.3842           98       165     2012      05        06        127              0.095500      29.621094       1.056731       0.155105       0.095000   -9999.000000   -9999.000000   -9999.000000
53967     53967     shanxi         111.1983       35.3842           98       165     2012      05        07        128              0.089417      30.723419       0.054603       0.156978   -9999.000000       0.036900       0.075700       0.244000
53967     53967     shanxi         111.1983       35.3842           98       165     2012      05        08        129              0.087458      27.659790       0.164614       0.162310       0.161000   -9999.000000       0.097700   -9999.000000
53967     53967     shanxi         111.1983       35.3842           98       165     2012      05        09        130              0.084000      30.686646       0.000000       0.155601       0.179000   -9999.000000       0.083600       0.242000
53967     53967     shanxi         111.1983       35.3842           98       165     2012      05        10        131              0.081917      28.838745       0.000000       0.154599       0.179000       0.186900       0.092000       0.247000
53967     53967     shanxi         111.1983       35.3842           98       165     2012      05        11        132              0.076625      30.641724       2.013692       0.153220       0.202500   -9999.000000       0.093600       0.325000
53967     53967     shanxi         111.1983       35.3842           98       165     2012      05        12        133              0.078542      24.243011       0.000000       0.172425       0.184500   -9999.000000   -9999.000000       0.124000
53967     53967     shanxi         111.1983       35.3842           98       165     2012      05        13        134              0.081333      21.518005       0.000000       0.170571       0.176000       0.094400       0.047700   -9999.000000
53967     53967     shanxi         111.1983       35.3842           98       165     2012      05        14        135              0.081083      24.166870       0.000000       0.157969       0.176000   -9999.000000       0.118400       0.309000
53967     53967     shanxi         111.1983       35.3842           98       165     2012      05        15        136              0.078917      25.843353       0.000000       0.154013       0.175000       0.276900       0.096900       0.167000
53967     53967     shanxi         111.1983       35.3842           98       165     2012      05        16        137              0.076667      26.316895       0.000000       0.151897       0.172000   -9999.000000       0.108900       0.370000
53967     53967     shanxi         111.1983       35.3842           98       165     2012      05        17        138              0.074667      27.034058       0.000000       0.150673       0.159000   -9999.000000   -9999.000000       0.178000
53967     53967     shanxi         111.1983       35.3842           98       165     2012      05        18        139              0.071042      28.665894       0.963621       0.149824       0.174000       0.072500       0.120800   -9999.000000
53967     53967     shanxi         111.1983       35.3842           98       165     2012      05        19        140              0.070458      28.741241       0.000000       0.150243       0.169000   -9999.000000       0.070300       0.140000
53967     53967     shanxi         111.1983       35.3842           98       165     2012      05        20        141              0.068292      31.499390       0.414770       0.149937   -9999.000000       0.149400       0.117400       0.365000
53967     53967     shanxi         111.1983       35.3842           98       165     2012      05        21        142              0.061750      30.353088       2.864557       0.149653   -9999.000000   -9999.000000       0.114200       0.346000
53967     53967     shanxi         111.1983       35.3842           98       165     2012      05        22        143              0.064125      23.076141       0.836628       0.167036       0.170500   -9999.000000       0.117700       0.185000
53967     53967     shanxi         111.1983       35.3842           98       165     2012      05        23        144              0.069292      22.376648       7.408411       0.196041   -9999.000000       0.297700   -9999.000000   -9999.000000
53967     53967     shanxi         111.1983       35.3842           98       165     2012      05        24        145              0.069208      24.153351       0.000000       0.222292       0.201000   -9999.000000       0.091300       0.411000
53967     53967     shanxi         111.1983       35.3842           98       165     2012      05        25        146              0.000000      22.320587       0.000000       0.232485   -9999.000000   -9999.000000       0.123300   -9999.000000
53967     53967     shanxi         111.1983       35.3842           98       165     2012      05        26        147              0.077417      24.905334       0.894177       0.200957       0.182000   -9999.000000       0.097700       0.329000
53967     53967     shanxi         111.1983       35.3842           98       165     2012      05        27        148              0.077000      28.468567       0.073509       0.177626       0.144500       0.286000       0.106700   -9999.000000
53967     53967     shanxi         111.1983       35.3842           98       165     2012      05        28        149              0.084250      31.124176      24.059134       0.166303       0.176000       0.174200   -9999.000000   -9999.000000
53967     53967     shanxi         111.1983       35.3842           98       165     2012      05        29        150              0.169292      27.947113       1.464890       0.215629       0.217000   -9999.000000   -9999.000000       0.594000
53967     53967     shanxi         111.1983       35.3842           98       165     2012      05        30        151              0.156583      25.052307       0.000000       0.297752       0.182000       0.219700       0.066700   -9999.000000
53967     53967     shanxi         111.1983       35.3842           98       165     2012      05        31        152              0.142625      26.328461       0.133797       0.252401       0.177000       0.108600       0.071200   -9999.000000
53967     53967     shanxi         111.1983       35.3842           98       165     2012      06        01        153              0.138167      24.596954       0.021403       0.234285       0.123000   -9999.000000       0.098800   -9999.000000
53967     53967     shanxi         111.1983       35.3842           98       165     2012      06        02        154              0.133917      27.124664       0.000000       0.213477       0.120000       0.176000       0.107700       0.373000
53967     53967     shanxi         111.1983       35.3842           98       165     2012      06        03        155              0.126500      28.839172       0.000000       0.192558       0.135000   -9999.000000   -9999.000000       0.404000
53967     53967     shanxi         111.1983       35.3842           98       165     2012      06        04        156              0.122000      28.709442       0.000000       0.181520       0.139000   -9999.000000       0.081200   -9999.000000
53967     53967     shanxi         111.1983       35.3842           98       165     2012      06        05        157              0.114042      30.727234       2.061192       0.174640       0.122000       0.122200       0.072000       0.400000
53967     53967     shanxi         111.1983       35.3842           98       165     2012      06        06        158              0.107833      28.111389       0.259063       0.184804       0.151000   -9999.000000       0.099400   -9999.000000
53967     53967     shanxi         111.1983       35.3842           98       165     2012      06        07        159              0.110696      25.035645       3.370841       0.193744       0.138500   -9999.000000       0.084300       0.362000
53967     53967     shanxi         111.1983       35.3842           98       165     2012      06        08        160              0.113083      29.064453       0.000000       0.205447       0.140000   -9999.000000       0.094800       0.412000
53967     53967     shanxi         111.1983       35.3842           98       165     2012      06        09        161              0.116545      28.141449       0.000000       0.195939       0.131000       0.104000   -9999.000000       0.447000
53967     53967     shanxi         111.1983       35.3842           98       165     2012      06        10        162              0.113143      31.822235       0.000000       0.175922       0.122000       0.143800       0.056500       0.337000
53967     53967     shanxi         111.1983       35.3842           98       165     2012      06        11        163              0.000000      31.383362       0.000000       0.166767       0.109000   -9999.000000       0.097500   -9999.000000
53967     53967     shanxi         111.1983       35.3842           98       165     2012      06        12        164              0.104250      31.503601       0.000000       0.162961       0.105000       0.092500       0.084000       0.381000
53967     53967     shanxi         111.1983       35.3842           98       165     2012      06        13        165              0.100444      33.206177       0.000000       0.160773       0.133500   -9999.000000       0.092600       0.374000
53967     53967     shanxi         111.1983       35.3842           98       165     2012      06        14        166              0.093619      34.305115       0.000000       0.159015       0.126000   -9999.000000   -9999.000000       0.423000
53967     53967     shanxi         111.1983       35.3842           98       165     2012      06        15        167              0.089050      31.788483       0.000000       0.157961   -9999.000000       0.147500   -9999.000000       0.289000
53967     53967     shanxi         111.1983       35.3842           98       165     2012      06        16        168              0.085105      32.150482       0.000000       0.156864       0.121000   -9999.000000       0.048200   -9999.000000
53967     53967     shanxi         111.1983       35.3842           98       165     2012      06        17        169              0.082500      33.269897       0.000000       0.155833       0.112500       0.307100       0.100100       0.294000
53967     53967     shanxi         111.1983       35.3842           98       165     2012      06        18        170              0.078391      34.560059       0.000000       0.155336       0.137500       0.048300       0.071300       0.418000
53967     53967     shanxi         111.1983       35.3842           98       165     2012      06        19        171              0.074625      35.186859       0.824028       0.154667       0.139000   -9999.000000       0.083100       0.466000
53967     53967     shanxi         111.1983       35.3842           98       165     2012      06        20        172              0.072167      33.057739       3.845000       0.160181       0.136000       0.218300   -9999.000000       0.383000
53967     53967     shanxi         111.1983       35.3842           98       165     2012      06        21        173              0.071875      30.562256       0.168999       0.196938       0.127000   -9999.000000       0.074400   -9999.000000
53967     53967     shanxi         111.1983       35.3842           98       165     2012      06        22        174              0.070500      32.280396       0.000000       0.177042       0.129000   -9999.000000       0.067700       0.363000
53967     53967     shanxi         111.1983       35.3842           98       165     2012      06        23        175              0.067958      35.324066       2.663818       0.162415       0.136500       0.177800       0.081300   -9999.000000
53967     53967     shanxi         111.1983       35.3842           98       165     2012      06        24        176              0.065292      35.070160       1.162076       0.172803       0.156000   -9999.000000       0.098200       0.448000
53967     53967     shanxi         111.1983       35.3842           98       165     2012      06        25        177              0.063792      30.501526       4.370764       0.192599   -9999.000000       0.140100       0.126800   -9999.000000
53967     53967     shanxi         111.1983       35.3842           98       165     2012      06        26        178              0.067917      27.134766       0.257592       0.223281       0.156000   -9999.000000   -9999.000000   -9999.000000
53967     53967     shanxi         111.1983       35.3842           98       165     2012      06        27        179              0.071292      27.419342       0.520865       0.205947       0.145000       0.313900       0.069200       0.407000
53967     53967     shanxi         111.1983       35.3842           98       165     2012      06        28        180              0.072250      27.469086       5.510769       0.184108       0.172500       0.259300       0.128800   -9999.000000
53967     53967     shanxi         111.1983       35.3842           98       165     2012      06        29        181              0.101833      26.477509       7.790128       0.199377       0.187500   -9999.000000       0.118500       0.977000
53967     53967     shanxi         111.1983       35.3842           98       165     2012      06        30        182              0.122042      25.675018       0.000000       0.285069       0.147000       0.174300       0.107200   -9999.000000
53967     53967     shanxi         111.1983       35.3842           98       165     2012      07        01        183              0.123042      29.836029       0.000000       0.236802   -9999.000000   -9999.000000   -9999.000000       0.524000
53967     53967     shanxi         111.1983       35.3842           98       165     2012      07        02        184              0.114667      32.195374       1.258373       0.202294       0.149000   -9999.000000       0.089800       0.456000
53967     53967     shanxi         111.1983       35.3842           98       165     2012      07        03        185              0.113250      30.323914       0.000000       0.197032       0.120000       0.240600       0.042900       0.450000
53967     53967     shanxi         111.1983       35.3842           98       165     2012      07        04        186              0.103458      32.337128       4.573421       0.180167       0.172000   -9999.000000       0.095600       0.546000
53967     53967     shanxi         111.1983       35.3842           98       165     2012      07        05        187              0.105167      26.966309       0.502910       0.226533       0.155000       0.222200       0.078700   -9999.000000
53967     53967     shanxi         111.1983       35.3842           98       165     2012      07        06        188              0.102667      31.353027       1.402526       0.198645   -9999.000000       0.249400       0.087200       0.442000
53967     53967     shanxi         111.1983       35.3842           98       165     2012      07        07        189              0.102292      31.662811       4.513305       0.181477   -9999.000000   -9999.000000   -9999.000000       0.639000
53967     53967     shanxi         111.1983       35.3842           98       165     2012      07        08        190              0.134292      28.906311      33.111706       0.234077       0.204500       0.395100       0.110700       0.535000
53967     53967     shanxi         111.1983       35.3842           98       165     2012      07        09        191              0.182917      26.721497       1.756851       0.299327       0.226000   -9999.000000       0.115900       0.950000
53967     53967     shanxi         111.1983       35.3842           98       165     2012      07        10        192              0.171333      26.307831       0.000000       0.326402       0.177000   -9999.000000       0.125400   -9999.000000
53967     53967     shanxi         111.1983       35.3842           98       165     2012      07        11        193              0.164500      30.385315       0.000000       0.291164       0.179000       0.316300       0.115500       0.778000
53967     53967     shanxi         111.1983       35.3842           98       165     2012      07        12        194              0.160250      31.468964       0.000000       0.266341       0.164000   -9999.000000       0.105400       0.577000
53967     53967     shanxi         111.1983       35.3842           98       165     2012      07        13        195              0.152500      32.215912      25.674566       0.238617       0.232000       0.100500   -9999.000000       0.589000
53967     53967     shanxi         111.1983       35.3842           98       165     2012      07        14        196              0.147417      28.713501       0.000000       0.336321       0.180000   -9999.000000       0.074600       0.656000
53967     53967     shanxi         111.1983       35.3842           98       165     2012      07        15        197              0.145333      28.027924       0.000000       0.306707       0.191000       0.451900       0.119000   -9999.000000
53967     53967     shanxi         111.1983       35.3842           98       165     2012      07        16        198              0.142792      28.234589       0.000000       0.280689       0.173000       0.179800       0.123500       0.440000
53967     53967     shanxi         111.1983       35.3842           98       165     2012      07        17        199              0.158208      27.930115       0.000000       0.263815   -9999.000000   -9999.000000       0.136500       0.662000
53967     53967     shanxi         111.1983       35.3842           98       165     2012      07        18        200              0.168333      28.765656       0.000000       0.245613       0.164000       0.106800   -9999.000000       0.493000
53967     53967     shanxi         111.1983       35.3842           98       165     2012      07        19        201              0.168375      29.766846       0.000000       0.229053       0.134500   -9999.000000       0.134200       0.346000
53967     53967     shanxi         111.1983       35.3842           98       165     2012      07        20        202              0.166217      31.336609       0.000000       0.213217       0.155500       0.433100       0.081200   -9999.000000
53967     53967     shanxi         111.1983       35.3842           98       165     2012      07        21        203              0.168435      32.369690      22.786682       0.200680       0.178000       0.254000       0.156100       0.893000
53967     53967     shanxi         111.1983       35.3842           98       165     2012      07        22        204              0.180375      29.687012       0.000000       0.319706       0.196000   -9999.000000       0.123100   -9999.000000
53967     53967     shanxi         111.1983       35.3842           98       165     2012      07        23        205              0.175708      28.870392       2.021731       0.295624   -9999.000000       0.193600       0.116600       0.529000
53967     53967     shanxi         111.1983       35.3842           98       165     2012      07        24        206              0.175042      28.530365       0.162306       0.271402       0.182000       0.337700   -9999.000000   -9999.000000
53967     53967     shanxi         111.1983       35.3842           98       165     2012      07        25        207              0.175000      29.666504       1.512525       0.252712       0.176000   -9999.000000       0.092600   -9999.000000
53967     53967     shanxi         111.1983       35.3842           98       165     2012      07        26        208              0.177333      31.590759       0.000000       0.236821       0.177500       0.247500       0.117200       0.555000
53967     53967     shanxi         111.1983       35.3842           98       165     2012      07        27        209              0.173500      33.579865       0.000000       0.215239       0.169000   -9999.000000       0.095800   -9999.000000
53967     53967     shanxi         111.1983       35.3842           98       165     2012      07        28        210              0.170292      34.424103       0.000000       0.197893       0.162000   -9999.000000       0.107900       0.548000
53967     53967     shanxi         111.1983       35.3842           98       165     2012      07        29        211              0.165542      36.099091       1.137957       0.187214       0.192000       0.048900   -9999.000000   -9999.000000
53967     53967     shanxi         111.1983       35.3842           98       165     2012      07        30        212              0.183417      34.755341      30.393967       0.192000       0.207000   -9999.000000   -9999.000000       0.536000
53967     53967     shanxi         111.1983       35.3842           98       165     2012      07        31        213              0.211667      31.893677       1.959011       0.285659       0.255500       0.108000       0.108800       0.797000
53967     53967     shanxi         111.1983       35.3842           98       165     2012      08        01        214              0.200750      27.500305       0.282132       0.325948       0.241000   -9999.000000       0.180500       0.692000
53967     53967     shanxi         111.1983       35.3842           98       165     2012      08        02        215              0.195750      27.145416       0.000000       0.296455       0.232000       0.156400       0.148700       0.616000
53967     53967     shanxi         111.1983       35.3842           98       165     2012      08        03        216              0.191917      29.607178       0.000000       0.278857       0.225000       0.164700       0.151500   -9999.000000
53967     53967     shanxi         111.1983       35.3842           98       165     2012      08        04        217              0.188417      30.321167       1.594859       0.258350       0.206000   -9999.000000   -9999.000000       0.625000
53967     53967     shanxi         111.1983       35.3842           98       165     2012      08        05        218              0.181417      31.087250       6.609520       0.237680       0.254000       0.150600       0.149700       0.812000
53967     53967     shanxi         111.1983       35.3842           98       165     2012      08        06        219              0.181000      28.465302       0.000000       0.272681       0.220000   -9999.000000       0.126400       0.714000
53967     53967     shanxi         111.1983       35.3842           98       165     2012      08        07        220              0.180250      29.652435       0.000000       0.253599       0.204000       0.215800       0.150200       0.488000
53967     53967     shanxi         111.1983       35.3842           98       165     2012      08        08        221              0.176500      31.584900       6.277455       0.230354   -9999.000000       0.102900       0.152300   -9999.000000
53967     53967     shanxi         111.1983       35.3842           98       165     2012      08        09        222              0.169458      32.052368       0.082254       0.233721       0.239000   -9999.000000       0.183700       0.776000
53967     53967     shanxi         111.1983       35.3842           98       165     2012      08        10        223              0.169583      27.303925       0.000000       0.261619       0.196000       0.143700   -9999.000000       0.555000
53967     53967     shanxi         111.1983       35.3842           98       165     2012      08        11        224              0.167458      29.920563       0.000000       0.230283       0.211500   -9999.000000       0.122600       0.615000
53967     53967     shanxi         111.1983       35.3842           98       165     2012      08        12        225              0.161208      31.464264       0.195571       0.212127       0.217000   -9999.000000       0.182000       0.430000
53967     53967     shanxi         111.1983       35.3842           98       165     2012      08        13        226              0.155292      29.091553       2.137044       0.207255   -9999.000000       0.115900       0.123600   -9999.000000
53967     53967     shanxi         111.1983       35.3842           98       165     2012      08        14        227              0.153000      25.045135      10.004455       0.219374       0.254000   -9999.000000       0.157100       0.756000
53967     53967     shanxi         111.1983       35.3842           98       165     2012      08        15        228              0.159208      24.663849       0.000000       0.294934       0.188500       0.297700   -9999.000000       0.706000
53967     53967     shanxi         111.1983       35.3842           98       165     2012      08        16        229              0.161167      28.093506       0.000000       0.258505       0.201500   -9999.000000   -9999.000000       0.520000
53967     53967     shanxi         111.1983       35.3842           98       165     2012      08        17        230              0.160583      28.185303      40.381615       0.236442       0.205000       0.214000       0.093700       0.400000
53967     53967     shanxi         111.1983       35.3842           98       165     2012      08        18        231              0.224500      28.546967      18.080421       0.270834   -9999.000000       0.107100       0.159500   -9999.000000
53967     53967     shanxi         111.1983       35.3842           98       165     2012      08        19        232              0.221333      24.786102       4.267632       0.369019       0.244000   -9999.000000       0.138300       0.767000
53967     53967     shanxi         111.1983       35.3842           98       165     2012      08        20        233              0.214875      24.399506       0.279409       0.346023       0.256000       0.433100       0.232600   -9999.000000
53967     53967     shanxi         111.1983       35.3842           98       165     2012      08        21        234              0.204708      25.316193       0.000000       0.331249       0.188500       0.086100   -9999.000000       0.742000
53967     53967     shanxi         111.1983       35.3842           98       165     2012      08        22        235              0.195417      25.038269       0.000000       0.313789       0.190500   -9999.000000       0.184700   -9999.000000
53967     53967     shanxi         111.1983       35.3842           98       165     2012      08        23        236              0.188875      24.606903       0.000000       0.299868       0.181000       0.111000       0.162800   -9999.000000
53967     53967     shanxi         111.1983       35.3842           98       165     2012      08        24        237              0.185917      23.431427       0.000000       0.286673   -9999.000000   -9999.000000       0.213600       0.704000
53967     53967     shanxi         111.1983       35.3842           98       165     2012      08        25        238              0.000000      25.004822       0.000000       0.276048       0.193000       0.096500       0.175800   -9999.000000
53967     53967     shanxi         111.1983       35.3842           98       165     2012      08        26        239              0.179167      24.729828       0.000000       0.270759       0.158000       0.180400       0.196900       0.544000
53967     53967     shanxi         111.1983       35.3842           98       165     2012      08        27        240              0.176667      26.210052       4.595241       0.263124       0.190500   -9999.000000   -9999.000000   -9999.000000
53967     53967     shanxi         111.1983       35.3842           98       165     2012      08        28        241              0.172667      27.335602       0.118157       0.252605       0.183000   -9999.000000       0.106400       0.545000
53967     53967     shanxi         111.1983       35.3842           98       165     2012      08        29        242              0.171583      28.021790       0.000000       0.242483       0.191000   -9999.000000       0.166800       0.510000
53967     53967     shanxi         111.1983       35.3842           98       165     2012      08        30        243              0.167250      29.396515       0.853886       0.228613       0.173000       0.381900       0.138000   -9999.000000
53967     53967     shanxi         111.1983       35.3842           98       165     2012      08        31        244              0.158500      28.924347      11.445186       0.218831       0.242000       0.144400       0.197500       0.855000
53967     53967     shanxi         111.1983       35.3842           98       165     2012      09        01        245              0.205000      23.602661      20.538355       0.297998       0.261000   -9999.000000   -9999.000000   -9999.000000
53967     53967     shanxi         111.1983       35.3842           98       165     2012      09        02        246              0.203333      21.673431       2.020075       0.344542       0.225000       0.279900       0.183300       0.791000
53967     53967     shanxi         111.1983       35.3842           98       165     2012      09        03        247              0.192833      22.823517       0.000000       0.315498       0.211000       0.108900       0.113600       0.575000
53967     53967     shanxi         111.1983       35.3842           98       165     2012      09        04        248              0.186542      23.950317       0.000000       0.296423       0.210000       0.127500       0.202800       0.676000
53967     53967     shanxi         111.1983       35.3842           98       165     2012      09        05        249              0.182125      24.393097       0.033185       0.283114       0.201000       0.095500       0.169800       0.449000
53967     53967     shanxi         111.1983       35.3842           98       165     2012      09        06        250              0.172333      25.325470       3.080551       0.273823       0.204500   -9999.000000       0.195800   -9999.000000
53967     53967     shanxi         111.1983       35.3842           98       165     2012      09        07        251              0.172000      22.411346       2.033694       0.285796       0.216000       0.289400   -9999.000000       0.676000
53967     53967     shanxi         111.1983       35.3842           98       165     2012      09        08        252              0.167833      25.269012       0.000000       0.282605       0.205000       0.079400       0.168800       0.562000
53967     53967     shanxi         111.1983       35.3842           98       165     2012      09        09        253              0.165458      24.862823       0.116369       0.275536   -9999.000000   -9999.000000       0.157200       0.671000
53967     53967     shanxi         111.1983       35.3842           98       165     2012      09        10        254              0.198292      25.475464      25.937990       0.258418       0.297000       0.116300       0.204700       0.989000
53967     53967     shanxi         111.1983       35.3842           98       165     2012      09        11        255              0.214708      21.351379       1.477692       0.335009       0.193000   -9999.000000       0.195300   -9999.000000
53967     53967     shanxi         111.1983       35.3842           98       165     2012      09        12        256              0.194667      23.277252       0.000000       0.330867       0.196000       0.133900       0.176400       0.627000
53967     53967     shanxi         111.1983       35.3842           98       165     2012      09        13        257              0.186208      19.133453       0.000000       0.310250       0.183000       0.224900   -9999.000000       0.516000
53967     53967     shanxi         111.1983       35.3842           98       165     2012      09        14        258              0.181417      19.721710       0.000000       0.296942       0.183000   -9999.000000       0.091100       0.526000
53967     53967     shanxi         111.1983       35.3842           98       165     2012      09        15        259              0.176667      21.256439       0.000000       0.287228       0.184000   -9999.000000       0.167100       0.423000
53967     53967     shanxi         111.1983       35.3842           98       165     2012      09        16        260              0.171750      21.520477       0.000000       0.278034       0.179000   -9999.000000       0.139200   -9999.000000
53967     53967     shanxi         111.1983       35.3842           98       165     2012      09        17        261              0.168208      21.362213       1.190106       0.270300       0.174500   -9999.000000       0.119200       0.451000
53967     53967     shanxi         111.1983       35.3842           98       165     2012      09        18        262              0.164750      21.931152       3.587924       0.268273       0.182000   -9999.000000   -9999.000000   -9999.000000
53967     53967     shanxi         111.1983       35.3842           98       165     2012      09        19        263              0.161833      21.895325       1.283098       0.287361       0.169000   -9999.000000       0.123200       0.497000
53967     53967     shanxi         111.1983       35.3842           98       165     2012      09        20        264              0.157250      22.704742       3.538922       0.275321   -9999.000000       0.133800       0.094700   -9999.000000
53967     53967     shanxi         111.1983       35.3842           98       165     2012      09        21        265              0.153208      21.483002       2.301646       0.280981   -9999.000000       0.162500       0.140100   -9999.000000
53967     53967     shanxi         111.1983       35.3842           98       165     2012      09        22        266              0.154333      20.622925       0.000000       0.298589       0.135500       0.174400       0.109700       0.606000
53967     53967     shanxi         111.1983       35.3842           98       165     2012      09        23        267              0.154000      22.349213       0.000000       0.281454       0.156000       0.195500       0.120900   -9999.000000
53967     53967     shanxi         111.1983       35.3842           98       165     2012      09        24        268              0.151750      22.888336       0.000000       0.270466       0.153000   -9999.000000   -9999.000000       0.509000
53967     53967     shanxi         111.1983       35.3842           98       165     2012      09        25        269              0.147542      22.791321       1.891593       0.260789       0.185000       0.188200       0.143800   -9999.000000
53967     53967     shanxi         111.1983       35.3842           98       165     2012      09        26        270              0.142750      21.074829       0.171608       0.270543       0.169000       0.051400       0.172100       0.669000
53967     53967     shanxi         111.1983       35.3842           98       165     2012      09        27        271              0.145000      19.778381       0.000000       0.270681       0.153000   -9999.000000       0.133600       0.463000
53967     53967     shanxi         111.1983       35.3842           98       165     2012      09        28        272              0.136867      20.132416       0.000000       0.257313       0.132000   -9999.000000       0.153100   -9999.000000
53967     53967     shanxi         111.1983       35.3842           98       165     2012      09        29        273              0.136667      17.844330       0.000000       0.246009       0.150000   -9999.000000       0.145700       0.412000
53967     53967     shanxi         111.1983       35.3842           98       165     2012      09        30        274              0.135667      18.464447       0.000000       0.238957       0.146000       0.080900   -9999.000000   -9999.000000
53967     53967     shanxi         111.1983       35.3842           98       165     2012      10        01        275              0.135708      18.878357       0.000000       0.231815       0.124000       0.023300       0.047700       0.501000
53967     53967     shanxi         111.1983       35.3842           98       165     2012      10        02        276              0.134083      20.243164       0.156526       0.224377       0.121000   -9999.000000       0.109400       0.486000
53967     53967     shanxi         111.1983       35.3842           98       165     2012      10        03        277              0.131000      21.495331       6.853536       0.219065       0.111500   -9999.000000       0.088400       0.581000
53967     53967     shanxi         111.1983       35.3842           98       165     2012      10        04        278              0.128750      21.983734       1.228997       0.214392       0.154500   -9999.000000       0.111600       0.467000
53967     53967     shanxi         111.1983       35.3842           98       165     2012      10        05        279              0.126458      21.076233       0.000000       0.220279       0.134000       0.304000   -9999.000000   -9999.000000
53967     53967     shanxi         111.1983       35.3842           98       165     2012      10        06        280              0.125583      20.156860       0.000000       0.218858   -9999.000000   -9999.000000       0.110500       0.456000
53967     53967     shanxi         111.1983       35.3842           98       165     2012      10        07        281              0.123417      20.333130       0.000000       0.209504       0.133000   -9999.000000       0.066200       0.443000
53967     53967     shanxi         111.1983       35.3842           98       165     2012      10        08        282              0.122042      18.622406       0.111907       0.207858       0.120500       0.149200       0.130400       0.514000
53967     53967     shanxi         111.1983       35.3842           98       165     2012      10        09        283              0.119000      20.045074       0.000000       0.205666       0.120500       0.023900       0.103200       0.300000
53967     53967     shanxi         111.1983       35.3842           98       165     2012      10        10        284              0.117458      19.074707       0.000000       0.198731       0.132000       0.053700       0.121300   -9999.000000
53967     53967     shanxi         111.1983       35.3842           98       165     2012      10        11        285              0.116750      19.431519       0.972031       0.193006       0.126000   -9999.000000   -9999.000000       0.259000
53967     53967     shanxi         111.1983       35.3842           98       165     2012      10        12        286              0.114750      20.849884       0.000000       0.190201       0.117000   -9999.000000       0.084200       0.421000
53967     53967     shanxi         111.1983       35.3842           98       165     2012      10        13        287              0.114333      20.202271       0.000000       0.189886       0.117000       0.068200       0.126200       0.401000
53967     53967     shanxi         111.1983       35.3842           98       165     2012      10        14        288              0.114083      20.819885       0.022224       0.187798       0.113000       0.062900       0.102500       0.282000
53967     53967     shanxi         111.1983       35.3842           98       165     2012      10        15        289              0.113333      19.475861       4.167618       0.185705       0.134000   -9999.000000       0.108100   -9999.000000
53967     53967     shanxi         111.1983       35.3842           98       165     2012      10        16        290              0.108958      17.744537       0.206882       0.200736       0.138000       0.277300   -9999.000000       0.374000
53967     53967     shanxi         111.1983       35.3842           98       165     2012      10        17        291              0.107958      14.460236       0.000000       0.237503   -9999.000000   -9999.000000   -9999.000000   -9999.000000
53967     53967     shanxi         111.1983       35.3842           98       165     2012      10        18        292              0.109583      14.362793       0.259824       0.218893       0.134000   -9999.000000       0.048000       0.442000
53967     53967     shanxi         111.1983       35.3842           98       165     2012      10        19        293              0.110833      15.091644       0.770376       0.213717       0.108000       0.092500       0.114700   -9999.000000
53967     53967     shanxi         111.1983       35.3842           98       165     2012      10        20        294              0.112708      16.666992       0.000000       0.209053       0.130000   -9999.000000       0.097900   -9999.000000
53967     53967     shanxi         111.1983       35.3842           98       165     2012      10        21        295              0.109542      18.538483       7.607852       0.202664       0.191000       0.145100       0.143800       0.661000
53967     53967     shanxi         111.1983       35.3842           98       165     2012      10        22        296              0.109042      13.087860       0.000000       0.261048   -9999.000000   -9999.000000   -9999.000000   -9999.000000
53967     53967     shanxi         111.1983       35.3842           98       165     2012      10        23        297              0.106500      12.761566       0.044691       0.256390   -9999.000000       0.173800       0.095100       0.353000
53967     53967     shanxi         111.1983       35.3842           98       165     2012      10        24        298              0.108750      10.425812       0.000000       0.248322   -9999.000000       0.214300       0.076600   -9999.000000
53967     53967     shanxi         111.1983       35.3842           98       165     2012      10        25        299              0.000000      12.705383       0.000000       0.241739       0.158500   -9999.000000       0.109400       0.390000
53967     53967     shanxi         111.1983       35.3842           98       165     2012      10        26        300              0.113375      14.252472       0.000000       0.235647       0.159000       0.361300       0.091300       0.294000
53967     53967     shanxi         111.1983       35.3842           98       165     2012      10        27        301              0.113458      13.609161       0.000000       0.232995       0.160000       0.164900       0.105000   -9999.000000
53967     53967     shanxi         111.1983       35.3842           98       165     2012      10        28        302              0.000000      15.337128       1.283126       0.227530       0.181000   -9999.000000   -9999.000000       0.543000
53967     53967     shanxi         111.1983       35.3842           98       165     2012      10        29        303              0.112083      15.055969       0.000000       0.231858   -9999.000000       0.222800       0.052700   -9999.000000
53967     53967     shanxi         111.1983       35.3842           98       165     2012      10        30        304              0.109333      14.004700       0.000000       0.234830       0.122000   -9999.000000       0.100200       0.297000
53967     53967     shanxi         111.1983       35.3842           98       165     2012      10        31        305              0.108667      11.486725       0.000000       0.223842       0.163000       0.224200       0.078500       0.243000
53967     53967     shanxi         111.1983       35.3842           98       165     2012      11        01        306              0.110292      11.539307       0.000000       0.217181       0.164000       0.116300       0.097200       0.315000
53967     53967     shanxi         111.1983       35.3842           98       165     2012      11        02        307              0.112042      12.270966       2.365676       0.213345   -9999.000000       0.123000   -9999.000000       0.285000
53967     53967     shanxi         111.1983       35.3842           98       165     2012      11        03        308              0.107833      14.153168       0.466700       0.217266   -9999.000000       0.143000       0.107300   -9999.000000
53967     53967     shanxi         111.1983       35.3842           98       165     2012      11        04        309              0.106000       7.711823       0.000000       0.234939       0.166000   -9999.000000       0.037400       0.295000
53967     53967     shanxi         111.1983       35.3842           98       165     2012      11        05        310              0.106583       5.954620       0.000000       0.223552       0.161000       0.378900       0.099600       0.183000
53967     53967     shanxi         111.1983       35.3842           98       165     2012      11        06        311              0.109125       6.824921       0.413335       0.218882       0.179000       0.066200       0.082200       0.328000
53967     53967     shanxi         111.1983       35.3842           98       165     2012      11        07        312              0.109042       8.803986       0.658796       0.216297       0.180000       0.222400       0.099400       0.189000
53967     53967     shanxi         111.1983       35.3842           98       165     2012      11        08        313              0.112083       8.401337       0.000000       0.217689       0.172000       0.127800   -9999.000000   -9999.000000
53967     53967     shanxi         111.1983       35.3842           98       165     2012      11        09        314              0.111750      10.192352       0.231511       0.214694   -9999.000000   -9999.000000       0.094300       0.161000
53967     53967     shanxi         111.1983       35.3842           98       165     2012      11        10        315              0.107625       8.392242       0.247291       0.214835       0.193000       0.197900       0.078500       0.247000
53967     53967     shanxi         111.1983       35.3842           98       165     2012      11        11        316              0.105750       6.007538       0.000000       0.217354       0.173000       0.141700       0.077700       0.182000
53967     53967     shanxi         111.1983       35.3842           98       165     2012      11        12        317              0.105167       5.987946       0.000000       0.211847       0.164000   -9999.000000       0.086200       0.144000
53967     53967     shanxi         111.1983       35.3842           98       165     2012      11        13        318              0.000000       6.847046       0.000000       0.209231   -9999.000000       0.211800       0.084300   -9999.000000
53967     53967     shanxi         111.1983       35.3842           98       165     2012      11        14        319              0.108792       7.520325       0.000000       0.206401       0.177000       0.129200   -9999.000000       0.111000
53967     53967     shanxi         111.1983       35.3842           98       165     2012      11        15        320              0.106750       8.374390       0.442605       0.203868       0.152000       0.233900       0.041300   -9999.000000
53967     53967     shanxi         111.1983       35.3842           98       165     2012      11        16        321              0.105375       5.843811       0.000000       0.209562       0.193000       0.263600       0.093500       0.291000
53967     53967     shanxi         111.1983       35.3842           98       165     2012      11        17        322              0.000000       6.409180       0.261582       0.210937       0.172000   -9999.000000       0.074400   -9999.000000
53967     53967     shanxi         111.1983       35.3842           98       165     2012      11        18        323              0.106167       7.690491       0.000000       0.209845       0.186000   -9999.000000       0.089300   -9999.000000
53967     53967     shanxi         111.1983       35.3842           98       165     2012      11        19        324              0.107750       8.042633       0.149139       0.207014       0.164000       0.072400   -9999.000000       0.212000
53967     53967     shanxi         111.1983       35.3842           98       165     2012      11        20        325              0.107875       8.432098       0.000000       0.204053       0.182000       0.232300       0.089700   -9999.000000
53967     53967     shanxi         111.1983       35.3842           98       165     2012      11        21        326              0.107833       7.513977       0.000000       0.204823       0.123000       0.060100       0.043400       0.237000
53967     53967     shanxi         111.1983       35.3842           98       165     2012      11        22        327              0.106333       8.524170       0.000000       0.204397       0.136000   -9999.000000       0.087800   -9999.000000
53967     53967     shanxi         111.1983       35.3842           98       165     2012      11        23        328              0.104458       6.489777       0.000000       0.203029       0.146000       0.225500       0.072000       0.060000
53967     53967     shanxi         111.1983       35.3842           98       165     2012      11        24        329              0.105125       5.326111       0.109019       0.199363       0.143000       0.095300       0.090200       0.164000
53967     53967     shanxi         111.1983       35.3842           98       165     2012      11        25        330              0.103625       6.488739       0.177343       0.198764   -9999.000000       0.242800   -9999.000000       0.179000
53967     53967     shanxi         111.1983       35.3842           98       165     2012      11        26        331              0.101167       4.529327       0.000000       0.197197       0.109000       0.024600   -9999.000000       0.213000
53967     53967     shanxi         111.1983       35.3842           98       165     2012      11        27        332              0.101708       3.986938       0.000000       0.193918       0.140000   -9999.000000       0.079200   -9999.000000
53967     53967     shanxi         111.1983       35.3842           98       165     2012      11        28        333              0.100583       5.048737       0.000000       0.194238       0.140000       0.270700       0.060500       0.200000
53967     53967     shanxi         111.1983       35.3842           98       165     2012      11        29        334              0.098833       2.849396       0.000000       0.189578   -9999.000000       0.117800       0.076100       0.066000
53967     53967     shanxi         111.1983       35.3842           98       165     2012      11        30        335              0.099083       2.132050       0.186171       0.186953   -9999.000000   -9999.000000   -9999.000000       0.223000
53967     53967     shanxi         111.1983       35.3842           98       165     2012      12        01        336              0.099417       3.312103       0.116262       0.190753   -9999.000000       0.214500   -9999.000000       0.337000
53967     53967     shanxi         111.1983       35.3842           98       165     2012      12        02        337              0.099250       1.802582       0.000000       0.194137       0.150000   -9999.000000       0.016300   -9999.000000
53967     53967     shanxi         111.1983       35.3842           98       165     2012      12        03        338              0.098708       2.900757       0.000000       0.196063       0.152000       0.250000       0.080600       0.246000
53967     53967     shanxi         111.1983       35.3842           98       165     2012      12        04        339              0.098250       2.818085       0.000000       0.192418       0.155000       0.061600       0.065100       0.131000
53967     53967     shanxi         111.1983       35.3842           98       165     2012      12        05        340              0.099083       3.592621       0.000000       0.194295   -9999.000000   -9999.000000       0.077400       0.181000
53967     53967     shanxi         111.1983       35.3842           98       165     2012      12        06        341              0.099667       2.430542       0.000000       0.188636   -9999.000000   -9999.000000   -9999.000000       0.161000
53967     53967     shanxi         111.1983       35.3842           98       165     2012      12        07        342              0.100125       3.588806       0.661852       0.191371       0.119000       0.015900       0.059300   -9999.000000
53967     53967     shanxi         111.1983       35.3842           98       165     2012      12        08        343              0.097917       3.485291       0.000000       0.188722       0.135000       0.078900       0.039300       0.013000
53967     53967     shanxi         111.1983       35.3842           98       165     2012      12        09        344              0.095833       1.403351       0.000000       0.181981       0.136000       0.024200       0.077800       0.165000
53967     53967     shanxi         111.1983       35.3842           98       165     2012      12        10        345              0.094625       1.162140       0.000000       0.180953   -9999.000000   -9999.000000       0.055700       0.094000
53967     53967     shanxi         111.1983       35.3842           98       165     2012      12        11        346              0.095833       1.458038       0.000000       0.181688   -9999.000000   -9999.000000       0.072000       0.109000
53967     53967     shanxi         111.1983       35.3842           98       165     2012      12        12        347              0.097333       0.804504       0.000000       0.180846   -9999.000000       0.101700   -9999.000000   -9999.000000
53967     53967     shanxi         111.1983       35.3842           98       165     2012      12        13        348              0.098000       1.157501       0.212156       0.183484   -9999.000000       0.146700       0.028000       0.083000
53967     53967     shanxi         111.1983       35.3842           98       165     2012      12        14        349              0.097250       0.565765       0.000000       0.187795   -9999.000000       0.026200       0.075100   -9999.000000
53967     53967     shanxi         111.1983       35.3842           98       165     2012      12        15        350              0.000000       1.512085       0.000000       0.191386   -9999.000000   -9999.000000       0.068200       0.334000
53967     53967     shanxi         111.1983       35.3842           98       165     2012      12        16        351              0.098000       1.672058       0.000000       0.194856   -9999.000000   -9999.000000       0.085800   -9999.000000
53967     53967     shanxi         111.1983       35.3842           98       165     2012      12        17        352              0.098333       1.815552       0.000000       0.197795   -9999.000000       0.120400   -9999.000000   -9999.000000
53967     53967     shanxi         111.1983       35.3842           98       165     2012      12        18        353              0.096792       2.279236       0.000000       0.197044       0.115000   -9999.000000       0.071100       0.115000
53967     53967     shanxi         111.1983       35.3842           98       165     2012      12        19        354              0.096750       2.198242       0.000000       0.194037   -9999.000000       0.058000       0.013600   -9999.000000
53967     53967     shanxi         111.1983       35.3842           98       165     2012      12        20        355              0.000000       0.807953       0.249954       0.191752   -9999.000000       0.061400       0.068400       0.209000
53967     53967     shanxi         111.1983       35.3842           98       165     2012      12        21        356              0.095208      -0.613464       0.000000       0.185158   -9999.000000       0.114800       0.059000   -9999.000000
53967     53967     shanxi         111.1983       35.3842           98       165     2012      12        22        357              0.091125      -0.256042       0.000000       0.186052   -9999.000000       0.099700       0.068200       0.146000
53967     53967     shanxi         111.1983       35.3842           98       165     2012      12        23        358              0.079792      -1.985657       0.000000       0.177077   -9999.000000   -9999.000000   -9999.000000       0.062000
53967     53967     shanxi         111.1983       35.3842           98       165     2012      12        24        359              0.077111      -4.418396       0.000000       0.161350   -9999.000000   -9999.000000       0.053700   -9999.000000
53967     53967     shanxi         111.1983       35.3842           98       165     2012      12        25        360              0.078958      -2.759277       0.000000       0.170071   -9999.000000       0.022600       0.047700       0.071000
53967     53967     shanxi         111.1983       35.3842           98       165     2012      12        26        361              0.000000      -1.982361       0.000000       0.173582   -9999.000000       0.129900       0.068600   -9999.000000
53967     53967     shanxi         111.1983       35.3842           98       165     2012      12        27        362              0.085091      -1.627869       0.000000       0.175586   -9999.000000       0.025500       0.068100       0.082000
53967     53967     shanxi         111.1983       35.3842           98       165     2012      12        28        363              0.083000      -1.426697       0.000000       0.176872   -9999.000000   -9999.000000       0.072400       0.065000
53967     53967     shanxi         111.1983       35.3842           98       165     2012      12        29        364              0.000000      -1.540009       0.000000       0.177337   -9999.000000   -9999.000000   -9999.000000       0.110000
53967     53967     shanxi         111.1983       35.3842           98       165     2012      12        30        365              0.000000      -3.271332       0.000000       0.168385   -9999.000000       0.077900       0.013100       0.036000
53967     53967     shanxi         111.1983       35.3842           98       165     2012      12        31        366              0.075467      -2.722382       0.000000       0.169731       0.118000       0.130000       0.059100   -9999.000000
