# Supplementary material for: Research on Fusing Multisatellite Soil Moisture Data Based on Bayesian Model Averaging
Source: Hindawi journal article supplement (doi:10.1155/2018/9310838), 2018-06-25
Supplement: f1 [file 9310838.f1.zip › 2012_sm00-10cm_daily_ZDB_ZHY_53970_366days_allin.txt]

53970     53970     shanxi         112.0875       35.6639           97       168     2012      01        01        001              0.000000   -9999.000000       0.000000   -9999.000000       0.085000   -9999.000000       0.047200   -9999.000000
53970     53970     shanxi         112.0875       35.6639           97       168     2012      01        02        002              0.027417      -1.342468       0.000000       0.183686       0.092000   -9999.000000       0.045800       0.009000
53970     53970     shanxi         112.0875       35.6639           97       168     2012      01        03        003              0.000000      -2.441193       0.165071       0.177454   -9999.000000       0.059200   -9999.000000   -9999.000000
53970     53970     shanxi         112.0875       35.6639           97       168     2012      01        04        004              0.019708      -5.548401       0.544191       0.156556   -9999.000000       0.110100       0.045100   -9999.000000
53970     53970     shanxi         112.0875       35.6639           97       168     2012      01        05        005              0.019083      -5.511444       0.000000       0.156150   -9999.000000   -9999.000000       0.048000       0.026000
53970     53970     shanxi         112.0875       35.6639           97       168     2012      01        06        006              0.019708      -3.654449       0.000000       0.168590       0.081000   -9999.000000       0.046600   -9999.000000
53970     53970     shanxi         112.0875       35.6639           97       168     2012      01        07        007              0.020250      -1.932648       0.000000       0.179203       0.092000   -9999.000000       0.048200       0.015000
53970     53970     shanxi         112.0875       35.6639           97       168     2012      01        08        008              0.000000      -2.261230       0.000000       0.176845       0.093000       0.045200   -9999.000000   -9999.000000
53970     53970     shanxi         112.0875       35.6639           97       168     2012      01        09        009              0.020542      -1.369934       0.000000       0.184143   -9999.000000       0.176800   -9999.000000   -9999.000000
53970     53970     shanxi         112.0875       35.6639           97       168     2012      01        10        010              0.021083      -1.220764       0.000000       0.186379   -9999.000000       0.004700       0.030000       0.029000
53970     53970     shanxi         112.0875       35.6639           97       168     2012      01        11        011              0.019250      -1.640808       0.000000       0.183901       0.081000   -9999.000000       0.037400   -9999.000000
53970     53970     shanxi         112.0875       35.6639           97       168     2012      01        12        012              0.019500      -1.898071       0.000000       0.180043       0.100000       0.033700       0.037300       0.019000
53970     53970     shanxi         112.0875       35.6639           97       168     2012      01        13        013              0.020042      -1.392700       0.000000       0.184361       0.091000   -9999.000000       0.036400   -9999.000000
53970     53970     shanxi         112.0875       35.6639           97       168     2012      01        14        014              0.018875      -0.878815       0.000000       0.187304   -9999.000000   -9999.000000   -9999.000000   -9999.000000
53970     53970     shanxi         112.0875       35.6639           97       168     2012      01        15        015              0.019333      -1.677032       0.000000       0.182556   -9999.000000       0.093200       0.037000       0.033000
53970     53970     shanxi         112.0875       35.6639           97       168     2012      01        16        016              0.019208      -0.253265       0.000000       0.191783   -9999.000000       0.006700       0.032400       0.028000
53970     53970     shanxi         112.0875       35.6639           97       168     2012      01        17        017              0.000000      -1.429565       0.000000       0.181375       0.086000       0.070700       0.034200       0.015000
53970     53970     shanxi         112.0875       35.6639           97       168     2012      01        18        018              0.020667      -0.039398       0.000000       0.195410       0.097000   -9999.000000       0.033300   -9999.000000
53970     53970     shanxi         112.0875       35.6639           97       168     2012      01        19        019              0.025333      -0.096405       0.119616       0.194837       0.094000   -9999.000000       0.031400   -9999.000000
53970     53970     shanxi         112.0875       35.6639           97       168     2012      01        20        020              0.025000      -0.112457       0.286051       0.194537   -9999.000000   -9999.000000   -9999.000000       0.040000
53970     53970     shanxi         112.0875       35.6639           97       168     2012      01        21        021              0.024583      -1.117920       0.000000       0.189441   -9999.000000       0.018400       0.030700       0.018000
53970     53970     shanxi         112.0875       35.6639           97       168     2012      01        22        022              0.022458      -3.560547       0.000000       0.168189   -9999.000000       0.057200       0.029500   -9999.000000
53970     53970     shanxi         112.0875       35.6639           97       168     2012      01        23        023              0.018917      -5.671234       0.000000       0.156501   -9999.000000   -9999.000000       0.029400   -9999.000000
53970     53970     shanxi         112.0875       35.6639           97       168     2012      01        24        024              0.016708      -6.409271       0.000000       0.150132   -9999.000000   -9999.000000   -9999.000000       0.012000
53970     53970     shanxi         112.0875       35.6639           97       168     2012      01        25        025              0.016917      -6.969055       0.000000       0.146157   -9999.000000       0.047300   -9999.000000   -9999.000000
53970     53970     shanxi         112.0875       35.6639           97       168     2012      01        26        026              0.018875      -4.666321       0.000000       0.159343   -9999.000000   -9999.000000       0.031000       0.069000
53970     53970     shanxi         112.0875       35.6639           97       168     2012      01        27        027              0.019167      -2.351868       0.959435       0.176863       0.087000   -9999.000000       0.029700       0.040000
53970     53970     shanxi         112.0875       35.6639           97       168     2012      01        28        028              0.018708      -0.643555       0.000000       0.189549       0.102000       0.009500       0.032300   -9999.000000
53970     53970     shanxi         112.0875       35.6639           97       168     2012      01        29        029              0.018375      -0.235840       0.000000       0.192388       0.103000   -9999.000000       0.036500       0.020000
53970     53970     shanxi         112.0875       35.6639           97       168     2012      01        30        030              0.022083       0.042603       0.000000       0.195242       0.102000       0.042400       0.037300       0.034000
53970     53970     shanxi         112.0875       35.6639           97       168     2012      01        31        031              0.029792       0.120819       0.000000       0.194746   -9999.000000       0.068600   -9999.000000       0.060000
53970     53970     shanxi         112.0875       35.6639           97       168     2012      02        01        032              0.023042       1.641205       0.000000       0.205089       0.084000   -9999.000000       0.034700   -9999.000000
53970     53970     shanxi         112.0875       35.6639           97       168     2012      02        02        033              0.019125      -1.478424       0.000000       0.185343       0.088000   -9999.000000       0.034600   -9999.000000
53970     53970     shanxi         112.0875       35.6639           97       168     2012      02        03        034              0.021875      -2.091370       0.000000       0.177780       0.092000   -9999.000000       0.036900       0.022000
53970     53970     shanxi         112.0875       35.6639           97       168     2012      02        04        035              0.019083      -0.069824       0.000000       0.189022   -9999.000000       0.214200       0.037000   -9999.000000
53970     53970     shanxi         112.0875       35.6639           97       168     2012      02        05        036              0.024917      -0.636169       0.000000       0.188293   -9999.000000       0.025900       0.040000       0.095000
53970     53970     shanxi         112.0875       35.6639           97       168     2012      02        06        037              0.017500       0.806610       0.000000       0.198212   -9999.000000   -9999.000000   -9999.000000   -9999.000000
53970     53970     shanxi         112.0875       35.6639           97       168     2012      02        07        038              0.014042      -2.705048       0.000000       0.178931       0.080000       0.107700       0.030300   -9999.000000
53970     53970     shanxi         112.0875       35.6639           97       168     2012      02        08        039              0.012000      -4.243347       0.000000       0.163421   -9999.000000       0.082300       0.037200   -9999.000000
53970     53970     shanxi         112.0875       35.6639           97       168     2012      02        09        040              0.013958      -6.135590       0.000000       0.149133       0.090000       0.058700       0.036600   -9999.000000
53970     53970     shanxi         112.0875       35.6639           97       168     2012      02        10        041              0.016083      -3.564087       0.000000       0.164135   -9999.000000       0.042400       0.037600       0.042000
53970     53970     shanxi         112.0875       35.6639           97       168     2012      02        11        042              0.019792      -1.884827       0.000000       0.178404   -9999.000000   -9999.000000   -9999.000000   -9999.000000
53970     53970     shanxi         112.0875       35.6639           97       168     2012      02        12        043              0.016917       1.235565       0.000000       0.194569   -9999.000000       0.086900   -9999.000000   -9999.000000
53970     53970     shanxi         112.0875       35.6639           97       168     2012      02        13        044              0.018083      -0.718994       0.000000       0.185803   -9999.000000       0.089900   -9999.000000       0.046000
53970     53970     shanxi         112.0875       35.6639           97       168     2012      02        14        045              0.023000       0.464630       0.000000       0.193784       0.083000   -9999.000000       0.040000       0.169000
53970     53970     shanxi         112.0875       35.6639           97       168     2012      02        15        046              0.021583       1.743134       0.000000       0.201104   -9999.000000   -9999.000000       0.042800       0.017000
53970     53970     shanxi         112.0875       35.6639           97       168     2012      02        16        047              0.017625       1.177032       0.000000       0.199075   -9999.000000   -9999.000000       0.035400   -9999.000000
53970     53970     shanxi         112.0875       35.6639           97       168     2012      02        17        048              0.014708      -0.537231       0.000000       0.185856       0.067000       0.059500   -9999.000000       0.031000
53970     53970     shanxi         112.0875       35.6639           97       168     2012      02        18        049              0.014667      -1.619659       0.000000       0.178025       0.088000       0.101100       0.034100       0.020000
53970     53970     shanxi         112.0875       35.6639           97       168     2012      02        19        050              0.020750      -1.134033       0.000000       0.179655       0.086000   -9999.000000       0.041300       0.121000
53970     53970     shanxi         112.0875       35.6639           97       168     2012      02        20        051              0.025542       1.913605       0.000000       0.192288       0.085000       0.031300       0.035300       0.119000
53970     53970     shanxi         112.0875       35.6639           97       168     2012      02        21        052              0.024583       3.434692       0.000000       0.201198   -9999.000000   -9999.000000   -9999.000000   -9999.000000
53970     53970     shanxi         112.0875       35.6639           97       168     2012      02        22        053              0.033304       3.663574       0.000000       0.205575       0.074000   -9999.000000       0.037000       0.116000
53970     53970     shanxi         112.0875       35.6639           97       168     2012      02        23        054              0.040542       4.588135       0.000000       0.209776       0.077000   -9999.000000   -9999.000000       0.141000
53970     53970     shanxi         112.0875       35.6639           97       168     2012      02        24        055              0.043125       3.624573       0.000000       0.202773       0.084000   -9999.000000       0.033700       0.245000
53970     53970     shanxi         112.0875       35.6639           97       168     2012      02        25        056              0.038292       1.933380       0.219479       0.199969   -9999.000000   -9999.000000       0.036500       0.150000
53970     53970     shanxi         112.0875       35.6639           97       168     2012      02        26        057              0.036750       0.036682       0.000000       0.190891   -9999.000000       0.083200       0.038800   -9999.000000
53970     53970     shanxi         112.0875       35.6639           97       168     2012      02        27        058              0.038583       1.339233       0.000000       0.195010   -9999.000000   -9999.000000   -9999.000000       0.115000
53970     53970     shanxi         112.0875       35.6639           97       168     2012      02        28        059              0.040292       2.977631       0.000000       0.200814       0.078000       0.017000   -9999.000000       0.242000
53970     53970     shanxi         112.0875       35.6639           97       168     2012      02        29        060              0.000000   -9999.000000       0.000000   -9999.000000       0.082000   -9999.000000   -9999.000000   -9999.000000
53970     53970     shanxi         112.0875       35.6639           97       168     2012      03        01        061              0.056792       3.369629       0.377804       0.203509   -9999.000000   -9999.000000       0.035700       0.395000
53970     53970     shanxi         112.0875       35.6639           97       168     2012      03        02        062              0.059875       2.247742       0.000000       0.207455   -9999.000000   -9999.000000       0.037700   -9999.000000
53970     53970     shanxi         112.0875       35.6639           97       168     2012      03        03        063              0.054292       2.746979       0.000000       0.207057   -9999.000000       0.151600       0.042100       0.064000
53970     53970     shanxi         112.0875       35.6639           97       168     2012      03        04        064              0.062292       2.118561       0.000000       0.199365       0.088000   -9999.000000       0.039200   -9999.000000
53970     53970     shanxi         112.0875       35.6639           97       168     2012      03        05        065              0.069917       2.699066       0.000000       0.202437       0.107000   -9999.000000   -9999.000000       0.236000
53970     53970     shanxi         112.0875       35.6639           97       168     2012      03        06        066              0.056042       1.977814       0.000000       0.200428       0.095000   -9999.000000       0.033200   -9999.000000
53970     53970     shanxi         112.0875       35.6639           97       168     2012      03        07        067              0.000000       1.598907       0.000000       0.195161   -9999.000000       0.150300       0.039300   -9999.000000
53970     53970     shanxi         112.0875       35.6639           97       168     2012      03        08        068              0.089833       5.327606       0.000000       0.205118   -9999.000000   -9999.000000       0.039100       0.205000
53970     53970     shanxi         112.0875       35.6639           97       168     2012      03        09        069              0.092250       4.891510       0.000000       0.202347       0.089000       0.010300       0.042400   -9999.000000
53970     53970     shanxi         112.0875       35.6639           97       168     2012      03        10        070              0.093125       5.386963       0.000000       0.203889       0.098000   -9999.000000       0.037900       0.166000
53970     53970     shanxi         112.0875       35.6639           97       168     2012      03        11        071              0.084042       6.530060       0.000000       0.201148       0.093000       0.210400   -9999.000000   -9999.000000
53970     53970     shanxi         112.0875       35.6639           97       168     2012      03        12        072              0.078625       6.096863       0.000000       0.196573       0.091000   -9999.000000       0.033500       0.207000
53970     53970     shanxi         112.0875       35.6639           97       168     2012      03        13        073              0.077500       6.155518       0.000000       0.196485   -9999.000000   -9999.000000       0.038000       0.330000
53970     53970     shanxi         112.0875       35.6639           97       168     2012      03        14        074              0.075958       9.380829       0.000000       0.195906       0.088000       0.073200   -9999.000000       0.291000
53970     53970     shanxi         112.0875       35.6639           97       168     2012      03        15        075              0.083750      10.433594       0.274491       0.192969       0.106000       0.204800       0.044500       0.278000
53970     53970     shanxi         112.0875       35.6639           97       168     2012      03        16        076              0.078958       5.553223       0.000000       0.197252       0.101000       0.155400   -9999.000000   -9999.000000
53970     53970     shanxi         112.0875       35.6639           97       168     2012      03        17        077              0.076792       8.354065       0.000000       0.198176       0.087000       0.026300       0.040700       0.390000
53970     53970     shanxi         112.0875       35.6639           97       168     2012      03        18        078              0.075458      12.798096       0.244278       0.192907       0.099000   -9999.000000       0.041500       0.277000
53970     53970     shanxi         112.0875       35.6639           97       168     2012      03        19        079              0.076000      10.846344       0.000000       0.187996   -9999.000000       0.183600       0.054000       0.362000
53970     53970     shanxi         112.0875       35.6639           97       168     2012      03        20        080              0.076208       4.505280       0.000000       0.190961       0.088000       0.315600       0.049600       0.198000
53970     53970     shanxi         112.0875       35.6639           97       168     2012      03        21        081              0.105875       7.621674       2.143510       0.192051       0.157000   -9999.000000       0.063600   -9999.000000
53970     53970     shanxi         112.0875       35.6639           97       168     2012      03        22        082              0.109875       3.196899       0.167204       0.211102   -9999.000000   -9999.000000   -9999.000000       0.636000
53970     53970     shanxi         112.0875       35.6639           97       168     2012      03        23        083              0.094917       3.737122       0.000000       0.224677   -9999.000000   -9999.000000       0.043500       0.313000
53970     53970     shanxi         112.0875       35.6639           97       168     2012      03        24        084              0.089542       6.362976       0.000000       0.212965   -9999.000000   -9999.000000   -9999.000000       0.482000
53970     53970     shanxi         112.0875       35.6639           97       168     2012      03        25        085              0.000000      10.154053       0.000000       0.203818       0.090000       0.264200       0.048800       0.256000
53970     53970     shanxi         112.0875       35.6639           97       168     2012      03        26        086              0.085292      12.318451       0.000000       0.193447       0.105500   -9999.000000       0.055600   -9999.000000
53970     53970     shanxi         112.0875       35.6639           97       168     2012      03        27        087              0.083458      14.211029       0.000000       0.185114       0.097000       0.041400       0.056600       0.172000
53970     53970     shanxi         112.0875       35.6639           97       168     2012      03        28        088              0.085667      16.130829       0.866440       0.178156       0.101000   -9999.000000   -9999.000000       0.568000
53970     53970     shanxi         112.0875       35.6639           97       168     2012      03        29        089              0.087667      15.540009       0.000000       0.183660       0.102000       0.089500       0.049100       0.252000
53970     53970     shanxi         112.0875       35.6639           97       168     2012      03        30        090              0.081000      14.276398       1.748477       0.188150       0.091000   -9999.000000       0.056500       0.185000
53970     53970     shanxi         112.0875       35.6639           97       168     2012      03        31        091              0.077875      10.171387       0.000000       0.183835       0.096000   -9999.000000       0.047900   -9999.000000
53970     53970     shanxi         112.0875       35.6639           97       168     2012      04        01        092              0.078625      13.276489       0.000000       0.176800       0.116000       0.213800       0.051200       0.340000
53970     53970     shanxi         112.0875       35.6639           97       168     2012      04        02        093              0.077417      16.961273       1.455528       0.171391       0.119000       0.097200   -9999.000000   -9999.000000
53970     53970     shanxi         112.0875       35.6639           97       168     2012      04        03        094              0.075000       9.999481       0.000000       0.190706       0.116000   -9999.000000       0.051700       0.222000
53970     53970     shanxi         112.0875       35.6639           97       168     2012      04        04        095              0.073833      12.550262       0.000000       0.182303       0.110000       0.048500       0.046200   -9999.000000
53970     53970     shanxi         112.0875       35.6639           97       168     2012      04        05        096              0.071333      15.849335       0.000000       0.173847       0.104000   -9999.000000       0.053700   -9999.000000
53970     53970     shanxi         112.0875       35.6639           97       168     2012      04        06        097              0.070042      15.608734       0.000000       0.168774       0.105000   -9999.000000       0.053600       0.332000
53970     53970     shanxi         112.0875       35.6639           97       168     2012      04        07        098              0.069708      16.682251       0.000000       0.166243       0.106000       0.328000       0.053100   -9999.000000
53970     53970     shanxi         112.0875       35.6639           97       168     2012      04        08        099              0.069333      18.388245       0.000000       0.164289       0.113000   -9999.000000   -9999.000000       0.165000
53970     53970     shanxi         112.0875       35.6639           97       168     2012      04        09        100              0.076042      20.667786       2.266657       0.162253       0.143000       0.008900       0.061600   -9999.000000
53970     53970     shanxi         112.0875       35.6639           97       168     2012      04        10        101              0.078667      16.585907       0.000000       0.185901       0.113000   -9999.000000       0.066600       0.231000
53970     53970     shanxi         112.0875       35.6639           97       168     2012      04        11        102              0.080083      17.064148       4.079155       0.189661       0.130000       0.040300       0.053300       0.212000
53970     53970     shanxi         112.0875       35.6639           97       168     2012      04        12        103              0.078542      17.745361       0.491782       0.197654       0.158000       0.252500       0.061500       0.486000
53970     53970     shanxi         112.0875       35.6639           97       168     2012      04        13        104              0.074042      13.240540       0.000000       0.219289   -9999.000000   -9999.000000   -9999.000000       0.193000
53970     53970     shanxi         112.0875       35.6639           97       168     2012      04        14        105              0.071083      16.677948       0.050165       0.197254       0.132000       0.032400   -9999.000000   -9999.000000
53970     53970     shanxi         112.0875       35.6639           97       168     2012      04        15        106              0.069917      16.431122       0.000000       0.185558       0.112000   -9999.000000       0.046300       0.184000
53970     53970     shanxi         112.0875       35.6639           97       168     2012      04        16        107              0.069417      19.293030       0.000000       0.175644       0.130000   -9999.000000       0.058500       0.209000
53970     53970     shanxi         112.0875       35.6639           97       168     2012      04        17        108              0.069083      19.932892       0.183105       0.169094       0.114000       0.184600       0.055700       0.330000
53970     53970     shanxi         112.0875       35.6639           97       168     2012      04        18        109              0.068375      18.778961       0.000000       0.167533       0.133000   -9999.000000   -9999.000000       0.165000
53970     53970     shanxi         112.0875       35.6639           97       168     2012      04        19        110              0.070375      20.631744       3.759401       0.164928       0.136000       0.186400   -9999.000000   -9999.000000
53970     53970     shanxi         112.0875       35.6639           97       168     2012      04        20        111              0.082417      21.902649       0.696821       0.184328       0.139500       0.039500       0.063100       0.160000
53970     53970     shanxi         112.0875       35.6639           97       168     2012      04        21        112              0.083750      17.499237       0.000000       0.217696       0.127000   -9999.000000       0.058700       0.117000
53970     53970     shanxi         112.0875       35.6639           97       168     2012      04        22        113              0.079333      20.749420       0.185400       0.193302       0.133000       0.007900       0.060800       0.314000
53970     53970     shanxi         112.0875       35.6639           97       168     2012      04        23        114              0.083375      24.058960       0.174512       0.176089       0.131000   -9999.000000       0.061200       0.223000
53970     53970     shanxi         112.0875       35.6639           97       168     2012      04        24        115              0.096250      24.517639       0.603418       0.169404       0.176000       0.142100       0.089400   -9999.000000
53970     53970     shanxi         112.0875       35.6639           97       168     2012      04        25        116              0.000000      14.600342       0.000000       0.178804       0.154000       0.208100   -9999.000000       0.238000
53970     53970     shanxi         112.0875       35.6639           97       168     2012      04        26        117              0.079250      16.755493       1.214453       0.169251       0.121000       0.103200       0.056700       0.337000
53970     53970     shanxi         112.0875       35.6639           97       168     2012      04        27        118              0.075583      21.049042       0.000000       0.162949       0.126500       0.075900   -9999.000000       0.117000
53970     53970     shanxi         112.0875       35.6639           97       168     2012      04        28        119              0.085875      23.413666       0.000000       0.159054       0.122000   -9999.000000       0.061500       0.197000
53970     53970     shanxi         112.0875       35.6639           97       168     2012      04        29        120              0.098458      25.273132       0.000000       0.157510       0.137000   -9999.000000       0.061400   -9999.000000
53970     53970     shanxi         112.0875       35.6639           97       168     2012      04        30        121              0.103333      25.365753       0.000000       0.157028       0.129000       0.292200   -9999.000000       0.157000
53970     53970     shanxi         112.0875       35.6639           97       168     2012      05        01        122              0.109083      23.093506       1.594140       0.157493       0.137000   -9999.000000       0.065300   -9999.000000
53970     53970     shanxi         112.0875       35.6639           97       168     2012      05        02        123              0.111792      24.175079       0.131544       0.157377       0.139000       0.046900       0.051100       0.234000
53970     53970     shanxi         112.0875       35.6639           97       168     2012      05        03        124              0.113375      24.258301       0.000000       0.158140       0.122000   -9999.000000       0.065000   -9999.000000
53970     53970     shanxi         112.0875       35.6639           97       168     2012      05        04        125              0.115417      24.664185       0.000000       0.155170   -9999.000000       0.143700       0.061700   -9999.000000
53970     53970     shanxi         112.0875       35.6639           97       168     2012      05        05        126              0.116250      26.807190       0.000000       0.153370       0.142000   -9999.000000       0.059900       0.217000
53970     53970     shanxi         112.0875       35.6639           97       168     2012      05        06        127              0.113792      27.964508       0.965446       0.153036       0.119500   -9999.000000   -9999.000000   -9999.000000
53970     53970     shanxi         112.0875       35.6639           97       168     2012      05        07        128              0.112000      28.225555       0.241676       0.153022   -9999.000000       0.230200       0.060800       0.224000
53970     53970     shanxi         112.0875       35.6639           97       168     2012      05        08        129              0.113125      24.690704       2.312168       0.161155       0.132000       0.017000       0.064200   -9999.000000
53970     53970     shanxi         112.0875       35.6639           97       168     2012      05        09        130              0.111667      26.079407       0.098522       0.176336       0.114000   -9999.000000       0.066500       0.367000
53970     53970     shanxi         112.0875       35.6639           97       168     2012      05        10        131              0.111833      24.743073       0.523790       0.172766       0.134000   -9999.000000       0.055300       0.261000
53970     53970     shanxi         112.0875       35.6639           97       168     2012      05        11        132              0.107958      27.453613       7.310630       0.159146       0.174000   -9999.000000       0.061600       0.277000
53970     53970     shanxi         112.0875       35.6639           97       168     2012      05        12        133              0.104500      22.332306       0.000000       0.212277       0.133500       0.201800   -9999.000000       0.281000
53970     53970     shanxi         112.0875       35.6639           97       168     2012      05        13        134              0.106000      17.603546       0.000000       0.221661       0.138000       0.253800       0.060400   -9999.000000
53970     53970     shanxi         112.0875       35.6639           97       168     2012      05        14        135              0.106000      20.455597       0.000000       0.194449       0.127000       0.108000       0.075800       0.230000
53970     53970     shanxi         112.0875       35.6639           97       168     2012      05        15        136              0.104917      21.300964       0.000000       0.175734       0.150000       0.123400       0.069800       0.309000
53970     53970     shanxi         112.0875       35.6639           97       168     2012      05        16        137              0.104250      22.616730       0.387537       0.163919       0.136000   -9999.000000       0.070200       0.290000
53970     53970     shanxi         112.0875       35.6639           97       168     2012      05        17        138              0.105125      23.767273       0.000000       0.158547       0.129000   -9999.000000   -9999.000000       0.213000
53970     53970     shanxi         112.0875       35.6639           97       168     2012      05        18        139              0.103833      26.261566       0.000000       0.155419       0.146000       0.304000       0.074400   -9999.000000
53970     53970     shanxi         112.0875       35.6639           97       168     2012      05        19        140              0.102625      27.126007       0.118749       0.154251       0.135000   -9999.000000       0.066700       0.271000
53970     53970     shanxi         112.0875       35.6639           97       168     2012      05        20        141              0.101542      28.024231       0.165405       0.153638   -9999.000000   -9999.000000       0.070600       0.342000
53970     53970     shanxi         112.0875       35.6639           97       168     2012      05        21        142              0.096875      27.392639       2.121183       0.152720       0.167000   -9999.000000       0.071600       0.238000
53970     53970     shanxi         112.0875       35.6639           97       168     2012      05        22        143              0.093792      20.325806       0.822661       0.169619       0.136500       0.094700       0.078800       0.308000
53970     53970     shanxi         112.0875       35.6639           97       168     2012      05        23        144              0.096500      19.453857       4.204379       0.193077   -9999.000000       0.226200   -9999.000000   -9999.000000
53970     53970     shanxi         112.0875       35.6639           97       168     2012      05        24        145              0.096417      20.744568       0.000000       0.208434       0.158000   -9999.000000       0.075300       0.571000
53970     53970     shanxi         112.0875       35.6639           97       168     2012      05        25        146              0.000000      19.730774       0.227610       0.210092       0.151000       0.488100       0.075100       0.346000
53970     53970     shanxi         112.0875       35.6639           97       168     2012      05        26        147              0.104208      22.929474       1.264693       0.183564       0.148000       0.077900       0.077000       0.260000
53970     53970     shanxi         112.0875       35.6639           97       168     2012      05        27        148              0.106583      25.167847       0.000000       0.166394       0.127500       0.134800       0.070700       0.275000
53970     53970     shanxi         112.0875       35.6639           97       168     2012      05        28        149              0.104917      27.829498       8.518190       0.158099       0.134000       0.161500       0.072100   -9999.000000
53970     53970     shanxi         112.0875       35.6639           97       168     2012      05        29        150              0.102625      26.186859       4.342420       0.184950       0.173000   -9999.000000   -9999.000000       0.606000
53970     53970     shanxi         112.0875       35.6639           97       168     2012      05        30        151              0.107083      22.066040       0.000000       0.262219       0.136000       0.198100       0.072700   -9999.000000
53970     53970     shanxi         112.0875       35.6639           97       168     2012      05        31        152              0.104542      24.592529       0.052749       0.215164       0.144000       0.134700   -9999.000000   -9999.000000
53970     53970     shanxi         112.0875       35.6639           97       168     2012      06        01        153              0.104375      23.040649       0.245893       0.194439       0.118000   -9999.000000       0.071500   -9999.000000
53970     53970     shanxi         112.0875       35.6639           97       168     2012      06        02        154              0.107042      24.954193       0.703852       0.180072       0.107000       0.175800       0.072300   -9999.000000
53970     53970     shanxi         112.0875       35.6639           97       168     2012      06        03        155              0.108000      25.031586       0.000000       0.176385       0.104000   -9999.000000   -9999.000000       0.273000
53970     53970     shanxi         112.0875       35.6639           97       168     2012      06        04        156              0.109167      26.185150       0.000000       0.167075       0.098000   -9999.000000       0.092400   -9999.000000
53970     53970     shanxi         112.0875       35.6639           97       168     2012      06        05        157              0.106500      28.895874       3.059939       0.159993   -9999.000000       0.334900       0.091700       0.288000
53970     53970     shanxi         112.0875       35.6639           97       168     2012      06        06        158              0.100500      26.708923       0.087405       0.176259       0.114000   -9999.000000       0.100000   -9999.000000
53970     53970     shanxi         112.0875       35.6639           97       168     2012      06        07        159              0.103125      21.411835       0.451198       0.194520       0.099000       0.065700       0.093200       0.289000
53970     53970     shanxi         112.0875       35.6639           97       168     2012      06        08        160              0.100208      26.080963       0.000000       0.174279       0.107000   -9999.000000       0.091100       0.305000
53970     53970     shanxi         112.0875       35.6639           97       168     2012      06        09        161              0.099375      26.171448       0.000000       0.163118       0.102000       0.058000   -9999.000000       0.413000
53970     53970     shanxi         112.0875       35.6639           97       168     2012      06        10        162              0.097250      29.893066       0.000000       0.156077   -9999.000000       0.166100       0.085700       0.302000
53970     53970     shanxi         112.0875       35.6639           97       168     2012      06        11        163              0.000000      28.295654       0.000000       0.152793       0.094000   -9999.000000       0.094200   -9999.000000
53970     53970     shanxi         112.0875       35.6639           97       168     2012      06        12        164              0.090000      28.237701       0.000000       0.150520       0.083500       0.059700       0.084700       0.222000
53970     53970     shanxi         112.0875       35.6639           97       168     2012      06        13        165              0.087000      30.421143       0.059126       0.149092       0.091500   -9999.000000       0.078700       0.316000
53970     53970     shanxi         112.0875       35.6639           97       168     2012      06        14        166              0.082083      31.423309       0.000000       0.148352       0.091000   -9999.000000       0.087300       0.417000
53970     53970     shanxi         112.0875       35.6639           97       168     2012      06        15        167              0.077292      28.517578       0.000000       0.147561       0.094000       0.104500   -9999.000000       0.295000
53970     53970     shanxi         112.0875       35.6639           97       168     2012      06        16        168              0.073542      29.089081       0.000000       0.146694       0.095000   -9999.000000       0.086000   -9999.000000
53970     53970     shanxi         112.0875       35.6639           97       168     2012      06        17        169              0.068375      30.383118       0.000000       0.146056       0.088500       0.191900       0.096700       0.283000
53970     53970     shanxi         112.0875       35.6639           97       168     2012      06        18        170              0.065708      30.797089       1.976746       0.145837       0.093500       0.243800       0.071300       0.357000
53970     53970     shanxi         112.0875       35.6639           97       168     2012      06        19        171              0.061458      32.210846       0.281179       0.146513       0.095000   -9999.000000       0.078700       0.433000
53970     53970     shanxi         112.0875       35.6639           97       168     2012      06        20        172              0.057125      30.750763       1.652029       0.146759   -9999.000000       0.154100   -9999.000000       0.349000
53970     53970     shanxi         112.0875       35.6639           97       168     2012      06        21        173              0.053708      27.687073       1.281066       0.159979       0.102000   -9999.000000       0.084300   -9999.000000
53970     53970     shanxi         112.0875       35.6639           97       168     2012      06        22        174              0.050833      28.739044       0.000000       0.161929       0.092000   -9999.000000       0.076100       0.282000
53970     53970     shanxi         112.0875       35.6639           97       168     2012      06        23        175              0.046875      31.418671       3.383532       0.153400       0.102000       0.140500       0.083300       0.454000
53970     53970     shanxi         112.0875       35.6639           97       168     2012      06        24        176              0.044750      28.833588       9.707478       0.181955       0.125500       0.292100       0.097200       0.568000
53970     53970     shanxi         112.0875       35.6639           97       168     2012      06        25        177              0.042417      25.062988       3.030881       0.275075   -9999.000000       0.149400       0.104400       0.777000
53970     53970     shanxi         112.0875       35.6639           97       168     2012      06        26        178              0.042750      23.664948       0.388023       0.252182       0.117000   -9999.000000   -9999.000000   -9999.000000
53970     53970     shanxi         112.0875       35.6639           97       168     2012      06        27        179              0.041667      24.333374       0.108435       0.227760       0.117000   -9999.000000       0.097100       0.416000
53970     53970     shanxi         112.0875       35.6639           97       168     2012      06        28        180              0.040958      23.216217      11.122657       0.207274       0.126500       0.201800       0.116100   -9999.000000
53970     53970     shanxi         112.0875       35.6639           97       168     2012      06        29        181              0.043583      23.455139       8.026865       0.239618       0.136000   -9999.000000       0.107000       1.000000
53970     53970     shanxi         112.0875       35.6639           97       168     2012      06        30        182              0.047042      22.708710       0.000000       0.299967       0.113000       0.221200       0.100600   -9999.000000
53970     53970     shanxi         112.0875       35.6639           97       168     2012      07        01        183              0.049583      26.700684       0.000000       0.253664   -9999.000000       0.192000   -9999.000000   -9999.000000
53970     53970     shanxi         112.0875       35.6639           97       168     2012      07        02        184              0.049875      28.376099       0.000000       0.222719       0.117000       0.228600   -9999.000000       0.398000
53970     53970     shanxi         112.0875       35.6639           97       168     2012      07        03        185              0.049542      27.274567       0.000000       0.203219       0.108000       0.161100       0.077200   -9999.000000
53970     53970     shanxi         112.0875       35.6639           97       168     2012      07        04        186              0.046292      29.535187       1.464051       0.187864       0.128000   -9999.000000       0.095000       0.454000
53970     53970     shanxi         112.0875       35.6639           97       168     2012      07        05        187              0.047375      24.706390       0.773061       0.200623       0.117000       0.262800       0.089000   -9999.000000
53970     53970     shanxi         112.0875       35.6639           97       168     2012      07        06        188              0.047333      28.894684       0.768339       0.185643   -9999.000000       0.089500       0.084600       0.333000
53970     53970     shanxi         112.0875       35.6639           97       168     2012      07        07        189              0.045000      29.289886       1.539671       0.174100   -9999.000000   -9999.000000   -9999.000000       0.513000
53970     53970     shanxi         112.0875       35.6639           97       168     2012      07        08        190              0.045750      26.102112      24.679667       0.198052       0.146000       0.101600       0.112300       0.623000
53970     53970     shanxi         112.0875       35.6639           97       168     2012      07        09        191              0.064250      25.927521       8.168508       0.273984       0.171000   -9999.000000       0.127300       1.000000
53970     53970     shanxi         112.0875       35.6639           97       168     2012      07        10        192              0.097292      23.674103       0.000000       0.322153       0.144000       0.323400       0.115300   -9999.000000
53970     53970     shanxi         112.0875       35.6639           97       168     2012      07        11        193              0.098750      28.132385       0.000000       0.283152       0.125000       0.206500       0.112800       0.847000
53970     53970     shanxi         112.0875       35.6639           97       168     2012      07        12        194              0.090792      29.098755       0.000000       0.257572       0.122000       0.270600       0.100500       0.589000
53970     53970     shanxi         112.0875       35.6639           97       168     2012      07        13        195              0.124792      29.665527      12.946298       0.231659   -9999.000000       0.140100   -9999.000000       0.571000
53970     53970     shanxi         112.0875       35.6639           97       168     2012      07        14        196              0.178500      25.258118       0.697198       0.282671       0.131000   -9999.000000       0.111800       0.729000
53970     53970     shanxi         112.0875       35.6639           97       168     2012      07        15        197              0.167875      25.003540       7.564591       0.276505       0.134000   -9999.000000       0.110400   -9999.000000
53970     53970     shanxi         112.0875       35.6639           97       168     2012      07        16        198              0.159792      24.886047       0.000000       0.300517       0.120000   -9999.000000       0.115100       0.667000
53970     53970     shanxi         112.0875       35.6639           97       168     2012      07        17        199              0.214000      24.417816       0.000000       0.275560   -9999.000000   -9999.000000       0.111000       0.563000
53970     53970     shanxi         112.0875       35.6639           97       168     2012      07        18        200              0.249208      25.246216       0.000000       0.254952       0.112000       0.088600   -9999.000000       0.584000
53970     53970     shanxi         112.0875       35.6639           97       168     2012      07        19        201              0.238750      25.695862       0.000000       0.239614       0.110500       0.057300   -9999.000000       0.446000
53970     53970     shanxi         112.0875       35.6639           97       168     2012      07        20        202              0.229783      27.469269       0.857047       0.223161       0.114000       0.181400       0.103500   -9999.000000
53970     53970     shanxi         112.0875       35.6639           97       168     2012      07        21        203              0.227957      27.870239       8.348912       0.219768       0.140000       0.430000       0.127200       0.959000
53970     53970     shanxi         112.0875       35.6639           97       168     2012      07        22        204              0.266667      26.595886       0.000000       0.261109       0.138000   -9999.000000       0.111600   -9999.000000
53970     53970     shanxi         112.0875       35.6639           97       168     2012      07        23        205              0.256750      26.684326       0.000000       0.255137       0.139000   -9999.000000       0.107300       0.545000
53970     53970     shanxi         112.0875       35.6639           97       168     2012      07        24        206              0.242375      26.789398       0.098835       0.231806       0.139000       0.039000   -9999.000000       0.505000
53970     53970     shanxi         112.0875       35.6639           97       168     2012      07        25        207              0.229000      28.647217       0.937221       0.212901       0.128500   -9999.000000       0.105900   -9999.000000
53970     53970     shanxi         112.0875       35.6639           97       168     2012      07        26        208              0.216625      29.686218       7.417501       0.207147       0.136000       0.067400       0.099600       0.460000
53970     53970     shanxi         112.0875       35.6639           97       168     2012      07        27        209              0.202000      30.526428       0.260444       0.234336       0.138000   -9999.000000       0.103300   -9999.000000
53970     53970     shanxi         112.0875       35.6639           97       168     2012      07        28        210              0.188500      30.787811       2.604044       0.211829   -9999.000000   -9999.000000       0.097200       0.559000
53970     53970     shanxi         112.0875       35.6639           97       168     2012      07        29        211              0.178958      32.579224       4.385132       0.195343       0.126000       0.164200       0.060600   -9999.000000
53970     53970     shanxi         112.0875       35.6639           97       168     2012      07        30        212              0.175708      31.946289      51.360291       0.220313       0.093000       0.167500   -9999.000000   -9999.000000
53970     53970     shanxi         112.0875       35.6639           97       168     2012      07        31        213              0.298167      28.221741       6.762196       0.315050       0.181000       0.138800       0.104100       0.918000
53970     53970     shanxi         112.0875       35.6639           97       168     2012      08        01        214              0.293708      24.213135       3.164841       0.345387       0.195000   -9999.000000       0.116400   -9999.000000
53970     53970     shanxi         112.0875       35.6639           97       168     2012      08        02        215              0.352375      25.067413       0.462893       0.321578       0.158000       0.046200       0.106700       0.831000
53970     53970     shanxi         112.0875       35.6639           97       168     2012      08        03        216              0.327125      26.281921       0.000000       0.312448       0.160000       0.251000       0.106000   -9999.000000
53970     53970     shanxi         112.0875       35.6639           97       168     2012      08        04        217              0.310583      26.853912       3.929404       0.295441       0.145000   -9999.000000   -9999.000000       0.784000
53970     53970     shanxi         112.0875       35.6639           97       168     2012      08        05        218              0.368375      26.636230       5.616504       0.287973       0.151500       0.120800       0.106600       0.881000
53970     53970     shanxi         112.0875       35.6639           97       168     2012      08        06        219              0.336750      25.475922       0.000000       0.315001       0.169000       0.204700       0.114100       0.769000
53970     53970     shanxi         112.0875       35.6639           97       168     2012      08        07        220              0.317083      26.214661       0.000000       0.291489       0.139000   -9999.000000       0.105700       0.612000
53970     53970     shanxi         112.0875       35.6639           97       168     2012      08        08        221              0.301542      27.783081       9.109845       0.274891       0.150000       0.351200       0.112000   -9999.000000
53970     53970     shanxi         112.0875       35.6639           97       168     2012      08        09        222              0.290958      28.498932       0.704059       0.292258       0.149000   -9999.000000       0.122900       0.759000
53970     53970     shanxi         112.0875       35.6639           97       168     2012      08        10        223              0.283208      24.341705       0.000000       0.298951       0.133000       0.303000   -9999.000000       0.681000
53970     53970     shanxi         112.0875       35.6639           97       168     2012      08        11        224              0.270042      26.851196       0.000000       0.274427       0.151500       0.184800       0.116500       0.707000
53970     53970     shanxi         112.0875       35.6639           97       168     2012      08        12        225              0.258792      27.329193       2.692550       0.264219       0.154000   -9999.000000       0.118700       0.845000
53970     53970     shanxi         112.0875       35.6639           97       168     2012      08        13        226              0.258750      25.244415       6.651639       0.273562       0.212000       0.172900       0.136000   -9999.000000
53970     53970     shanxi         112.0875       35.6639           97       168     2012      08        14        227              0.265542      22.140991      12.592826       0.293485       0.176000   -9999.000000       0.150700       1.000000
53970     53970     shanxi         112.0875       35.6639           97       168     2012      08        15        228              0.270042      22.157593       2.401448       0.329393       0.154000       0.235300       0.139300       0.706000
53970     53970     shanxi         112.0875       35.6639           97       168     2012      08        16        229              0.258292      25.491974       0.000000       0.297489       0.154000       0.212200   -9999.000000       0.778000
53970     53970     shanxi         112.0875       35.6639           97       168     2012      08        17        230              0.246167      25.334137      26.064199       0.283048       0.156000   -9999.000000       0.098100       0.607000
53970     53970     shanxi         112.0875       35.6639           97       168     2012      08        18        231              0.275500      25.572418      29.533869       0.307808   -9999.000000       0.274800       0.149400   -9999.000000
53970     53970     shanxi         112.0875       35.6639           97       168     2012      08        19        232              0.285000      22.540314       1.437813       0.367655       0.186000   -9999.000000       0.141500       1.000000
53970     53970     shanxi         112.0875       35.6639           97       168     2012      08        20        233              0.281917      22.684662       0.264815       0.339275       0.147000       0.148900       0.152300       0.805000
53970     53970     shanxi         112.0875       35.6639           97       168     2012      08        21        234              0.269583      23.315765       0.000000       0.326865       0.139500       0.188400   -9999.000000       0.951000
53970     53970     shanxi         112.0875       35.6639           97       168     2012      08        22        235              0.259917      23.144745       0.000000       0.313657       0.143500   -9999.000000       0.141800   -9999.000000
53970     53970     shanxi         112.0875       35.6639           97       168     2012      08        23        236              0.243750      22.427917       0.000000       0.304375       0.134000       0.170200       0.129900   -9999.000000
53970     53970     shanxi         112.0875       35.6639           97       168     2012      08        24        237              0.230333      21.026428       0.000000       0.296226   -9999.000000   -9999.000000       0.139200       0.645000
53970     53970     shanxi         112.0875       35.6639           97       168     2012      08        25        238              0.000000      22.810852       0.000000       0.289688       0.149000       0.278400       0.130200   -9999.000000
53970     53970     shanxi         112.0875       35.6639           97       168     2012      08        26        239              0.209583      22.792725       5.937066       0.286438       0.127500       0.252100       0.137800       0.591000
53970     53970     shanxi         112.0875       35.6639           97       168     2012      08        27        240              0.198583      23.193634       0.542559       0.307840       0.141000   -9999.000000   -9999.000000   -9999.000000
53970     53970     shanxi         112.0875       35.6639           97       168     2012      08        28        241              0.188375      24.037506       0.000000       0.295187       0.132000       0.391700       0.107900   -9999.000000
53970     53970     shanxi         112.0875       35.6639           97       168     2012      08        29        242              0.178167      25.213470       0.669296       0.284766       0.123000       0.224100       0.112400       0.521000
53970     53970     shanxi         112.0875       35.6639           97       168     2012      08        30        243              0.169750      26.100586       0.000000       0.279117       0.140000   -9999.000000       0.108000   -9999.000000
53970     53970     shanxi         112.0875       35.6639           97       168     2012      08        31        244              0.167000      25.800507       2.887377       0.268545       0.173000       0.119900       0.126300       0.631000
53970     53970     shanxi         112.0875       35.6639           97       168     2012      09        01        245              0.167000      22.198364      18.099403       0.282431       0.169500   -9999.000000       0.129800   -9999.000000
53970     53970     shanxi         112.0875       35.6639           97       168     2012      09        02        246              0.167000      20.507965       0.000000       0.337346       0.148000       0.395100   -9999.000000       0.810000
53970     53970     shanxi         112.0875       35.6639           97       168     2012      09        03        247              0.167500      20.388245       0.000000       0.312330       0.131000       0.140800       0.119800       0.698000
53970     53970     shanxi         112.0875       35.6639           97       168     2012      09        04        248              0.164917      20.996918       2.528878       0.297055       0.134000       0.073600       0.153500       0.683000
53970     53970     shanxi         112.0875       35.6639           97       168     2012      09        05        249              0.168542      22.129120       0.000000       0.288595       0.127000       0.178200       0.130600       0.602000
53970     53970     shanxi         112.0875       35.6639           97       168     2012      09        06        250              0.166833      23.091766      13.069533       0.283820       0.141500   -9999.000000       0.137900   -9999.000000
53970     53970     shanxi         112.0875       35.6639           97       168     2012      09        07        251              0.166583      19.840332       0.067264       0.321683       0.150000   -9999.000000   -9999.000000       0.879000
53970     53970     shanxi         112.0875       35.6639           97       168     2012      09        08        252              0.165375      22.702911       2.697129       0.309347       0.143000       0.239700       0.139400       0.801000
53970     53970     shanxi         112.0875       35.6639           97       168     2012      09        09        253              0.161500      22.138000       0.000000       0.307627       0.128000   -9999.000000       0.131200       0.801000
53970     53970     shanxi         112.0875       35.6639           97       168     2012      09        10        254              0.161333      22.400269      21.334379       0.295144       0.170000       0.108200       0.137000       1.000000
53970     53970     shanxi         112.0875       35.6639           97       168     2012      09        11        255              0.197750      19.305359       0.231095       0.337203       0.130500   -9999.000000       0.130200   -9999.000000
53970     53970     shanxi         112.0875       35.6639           97       168     2012      09        12        256              0.203583      20.460327       0.000000       0.330933       0.121000       0.184900       0.132700       0.771000
53970     53970     shanxi         112.0875       35.6639           97       168     2012      09        13        257              0.201333      15.986786       0.000000       0.315506       0.126000       0.305300   -9999.000000       0.577000
53970     53970     shanxi         112.0875       35.6639           97       168     2012      09        14        258              0.197500      17.029205       0.000000       0.306334       0.119000   -9999.000000       0.110200       0.700000
53970     53970     shanxi         112.0875       35.6639           97       168     2012      09        15        259              0.192500      18.543579       0.000000       0.299325       0.137000       0.168200       0.122800       0.499000
53970     53970     shanxi         112.0875       35.6639           97       168     2012      09        16        260              0.186875      18.412842       0.000000       0.294438       0.130000       0.034000       0.119100   -9999.000000
53970     53970     shanxi         112.0875       35.6639           97       168     2012      09        17        261              0.181750      18.596313       0.000000       0.290051       0.123000   -9999.000000       0.097000       0.436000
53970     53970     shanxi         112.0875       35.6639           97       168     2012      09        18        262              0.176208      18.983185       0.304919       0.285875       0.141000       0.069900   -9999.000000       0.595000
53970     53970     shanxi         112.0875       35.6639           97       168     2012      09        19        263              0.172708      19.227264       1.159113       0.283971       0.119000   -9999.000000   -9999.000000       0.501000
53970     53970     shanxi         112.0875       35.6639           97       168     2012      09        20        264              0.168500      19.906250       4.626248       0.284863   -9999.000000       0.168600       0.096000       0.444000
53970     53970     shanxi         112.0875       35.6639           97       168     2012      09        21        265              0.168625      19.395721       3.564911       0.293544   -9999.000000       0.111200       0.104500   -9999.000000
53970     53970     shanxi         112.0875       35.6639           97       168     2012      09        22        266              0.170292      17.462952       0.000000       0.313925       0.114000       0.150200       0.100200       0.641000
53970     53970     shanxi         112.0875       35.6639           97       168     2012      09        23        267              0.169208      20.192017       0.000000       0.297675       0.125500       0.064100       0.097900   -9999.000000
53970     53970     shanxi         112.0875       35.6639           97       168     2012      09        24        268              0.166500      20.394623       0.000000       0.290472       0.125000   -9999.000000   -9999.000000       0.521000
53970     53970     shanxi         112.0875       35.6639           97       168     2012      09        25        269              0.172875      20.191681       7.525496       0.284122       0.132000   -9999.000000       0.126700   -9999.000000
53970     53970     shanxi         112.0875       35.6639           97       168     2012      09        26        270              0.199167      19.004333       0.464341       0.305067       0.129000       0.154900       0.120900   -9999.000000
53970     53970     shanxi         112.0875       35.6639           97       168     2012      09        27        271              0.206214      17.678070       0.079260       0.309455       0.128000       0.206500       0.121500       0.594000
53970     53970     shanxi         112.0875       35.6639           97       168     2012      09        28        272              0.200600      16.329010       0.000000       0.295774       0.117000   -9999.000000       0.106600   -9999.000000
53970     53970     shanxi         112.0875       35.6639           97       168     2012      09        29        273              0.197375      14.704041       0.000000       0.287381       0.120500   -9999.000000       0.118000       0.515000
53970     53970     shanxi         112.0875       35.6639           97       168     2012      09        30        274              0.192792      15.635986       0.000000       0.282442       0.115000       0.100000   -9999.000000   -9999.000000
53970     53970     shanxi         112.0875       35.6639           97       168     2012      10        01        275              0.188292      16.035706       0.000000       0.277715       0.105000   -9999.000000       0.074600       0.525000
53970     53970     shanxi         112.0875       35.6639           97       168     2012      10        02        276              0.184375      17.655457       0.000000       0.273112       0.104000   -9999.000000       0.093800       0.480000
53970     53970     shanxi         112.0875       35.6639           97       168     2012      10        03        277              0.181333      18.877319       0.000000       0.270025       0.097000       0.111100       0.086400       0.600000
53970     53970     shanxi         112.0875       35.6639           97       168     2012      10        04        278              0.176958      19.650299       7.667810       0.266625       0.122500   -9999.000000       0.098000       0.936000
53970     53970     shanxi         112.0875       35.6639           97       168     2012      10        05        279              0.175708      18.316223       0.000000       0.293756       0.108000       0.122500   -9999.000000   -9999.000000
53970     53970     shanxi         112.0875       35.6639           97       168     2012      10        06        280              0.172542      16.647034       0.000000       0.291023       0.108000       0.209700       0.093600       0.630000
53970     53970     shanxi         112.0875       35.6639           97       168     2012      10        07        281              0.169667      17.116608       0.000000       0.281727       0.112000   -9999.000000       0.082000       0.590000
53970     53970     shanxi         112.0875       35.6639           97       168     2012      10        08        282              0.167875      16.306305       0.000000       0.278809       0.109000       0.237700       0.100400       0.571000
53970     53970     shanxi         112.0875       35.6639           97       168     2012      10        09        283              0.166542      17.088684       0.000000       0.275465       0.099500       0.205200       0.088800       0.466000
53970     53970     shanxi         112.0875       35.6639           97       168     2012      10        10        284              0.163667      14.917511       0.000000       0.267836       0.109000   -9999.000000       0.098400   -9999.000000
53970     53970     shanxi         112.0875       35.6639           97       168     2012      10        11        285              0.161833      15.812164       0.000000       0.263620       0.097000       0.031100   -9999.000000       0.511000
53970     53970     shanxi         112.0875       35.6639           97       168     2012      10        12        286              0.159750      17.098602       0.000000       0.260750       0.103000   -9999.000000       0.099300       0.482000
53970     53970     shanxi         112.0875       35.6639           97       168     2012      10        13        287              0.159333      16.928070       0.000000       0.259965       0.101000   -9999.000000       0.097800       0.573000
53970     53970     shanxi         112.0875       35.6639           97       168     2012      10        14        288              0.157000      17.552917       0.157274       0.256425       0.097500       0.283800       0.089100       0.376000
53970     53970     shanxi         112.0875       35.6639           97       168     2012      10        15        289              0.155542      16.657837       2.038097       0.254027       0.108500   -9999.000000       0.088600   -9999.000000
53970     53970     shanxi         112.0875       35.6639           97       168     2012      10        16        290              0.153875      14.856293       0.000000       0.260074       0.109000       0.137100       0.084600       0.339000
53970     53970     shanxi         112.0875       35.6639           97       168     2012      10        17        291              0.153000      10.842804       0.000000       0.263681   -9999.000000   -9999.000000   -9999.000000       0.424000
53970     53970     shanxi         112.0875       35.6639           97       168     2012      10        18        292              0.153375      11.239594       1.326470       0.256013       0.104000       0.137900       0.072300       0.520000
53970     53970     shanxi         112.0875       35.6639           97       168     2012      10        19        293              0.152750      13.803162       0.000000       0.261022       0.097500       0.119300       0.091100       0.282000
53970     53970     shanxi         112.0875       35.6639           97       168     2012      10        20        294              0.153042      14.043732       0.000000       0.259057       0.111000   -9999.000000       0.084400   -9999.000000
53970     53970     shanxi         112.0875       35.6639           97       168     2012      10        21        295              0.149875      16.342896       8.299847       0.254570       0.136000       0.167200       0.105600       0.744000
53970     53970     shanxi         112.0875       35.6639           97       168     2012      10        22        296              0.149542      10.348572       0.000000       0.294052   -9999.000000   -9999.000000   -9999.000000   -9999.000000
53970     53970     shanxi         112.0875       35.6639           97       168     2012      10        23        297              0.152708       9.903870       0.000000       0.284271   -9999.000000   -9999.000000       0.082300       0.505000
53970     53970     shanxi         112.0875       35.6639           97       168     2012      10        24        298              0.156958       9.118317       0.000000       0.278330   -9999.000000       0.182000       0.073300   -9999.000000
53970     53970     shanxi         112.0875       35.6639           97       168     2012      10        25        299              0.000000      10.901398       0.000000       0.273584       0.122500   -9999.000000       0.081800   -9999.000000
53970     53970     shanxi         112.0875       35.6639           97       168     2012      10        26        300              0.155750      12.736481       2.553862       0.269979       0.129500       0.132200       0.080200       0.425000
53970     53970     shanxi         112.0875       35.6639           97       168     2012      10        27        301              0.156458      11.744232       0.000000       0.269232       0.125000       0.167100       0.078700   -9999.000000
53970     53970     shanxi         112.0875       35.6639           97       168     2012      10        28        302              0.000000      13.312866       1.019248       0.265054   -9999.000000   -9999.000000   -9999.000000       0.503000
53970     53970     shanxi         112.0875       35.6639           97       168     2012      10        29        303              0.154708      13.622650       0.552165       0.262425       0.126000       0.068400       0.078200   -9999.000000
53970     53970     shanxi         112.0875       35.6639           97       168     2012      10        30        304              0.153000      11.213989       0.000000       0.261230       0.107000   -9999.000000       0.088200       0.255000
53970     53970     shanxi         112.0875       35.6639           97       168     2012      10        31        305              0.152708       8.466339       0.000000       0.256579       0.134000   -9999.000000       0.076600       0.347000
53970     53970     shanxi         112.0875       35.6639           97       168     2012      11        01        306              0.152750       9.040253       0.000000       0.254041       0.141000       0.158600       0.085300       0.541000
53970     53970     shanxi         112.0875       35.6639           97       168     2012      11        02        307              0.153000      10.354919       0.079772       0.252905       0.137000   -9999.000000   -9999.000000       0.390000
53970     53970     shanxi         112.0875       35.6639           97       168     2012      11        03        308              0.150000      12.158936       0.000000       0.250419   -9999.000000   -9999.000000   -9999.000000   -9999.000000
53970     53970     shanxi         112.0875       35.6639           97       168     2012      11        04        309              0.148000       4.057526       0.000000       0.237704   -9999.000000   -9999.000000       0.076000       0.448000
53970     53970     shanxi         112.0875       35.6639           97       168     2012      11        05        310              0.148583       2.126587       0.000000       0.225407       0.137000   -9999.000000       0.074400       0.372000
53970     53970     shanxi         112.0875       35.6639           97       168     2012      11        06        311              0.150792       4.067108       0.000000       0.241549       0.151000       0.214700       0.076500       0.528000
53970     53970     shanxi         112.0875       35.6639           97       168     2012      11        07        312              0.150833       7.289459       0.147091       0.248440       0.146000   -9999.000000       0.080400       0.376000
53970     53970     shanxi         112.0875       35.6639           97       168     2012      11        08        313              0.151958       6.108826       0.000000       0.249815       0.140000       0.059300   -9999.000000   -9999.000000
53970     53970     shanxi         112.0875       35.6639           97       168     2012      11        09        314              0.151000       8.295624       0.250451       0.248868       0.150000   -9999.000000       0.081400       0.342000
53970     53970     shanxi         112.0875       35.6639           97       168     2012      11        10        315              0.150458       6.580170       1.165458       0.251095       0.147000   -9999.000000       0.068800       0.328000
53970     53970     shanxi         112.0875       35.6639           97       168     2012      11        11        316              0.149292       3.178864       0.000000       0.241017       0.150000       0.230600       0.072800       0.447000
53970     53970     shanxi         112.0875       35.6639           97       168     2012      11        12        317              0.149417       2.890045       0.000000       0.231653       0.140000   -9999.000000       0.068900       0.272000
53970     53970     shanxi         112.0875       35.6639           97       168     2012      11        13        318              0.000000       4.163147       0.000000       0.240042   -9999.000000       0.149000       0.067200   -9999.000000
53970     53970     shanxi         112.0875       35.6639           97       168     2012      11        14        319              0.151417       4.843964       0.000000       0.241515       0.143000       0.176100   -9999.000000       0.268000
53970     53970     shanxi         112.0875       35.6639           97       168     2012      11        15        320              0.150917       6.195892       0.297941       0.244414       0.138000   -9999.000000       0.058700   -9999.000000
53970     53970     shanxi         112.0875       35.6639           97       168     2012      11        16        321              0.151000       3.664825       0.000000       0.244799       0.163000       0.175400       0.069000       0.267000
53970     53970     shanxi         112.0875       35.6639           97       168     2012      11        17        322              0.000000       3.449249       1.013538       0.239858       0.149000   -9999.000000       0.063700       0.370000
53970     53970     shanxi         112.0875       35.6639           97       168     2012      11        18        323              0.151750       6.281799       0.000000       0.246188       0.135000   -9999.000000       0.071800   -9999.000000
53970     53970     shanxi         112.0875       35.6639           97       168     2012      11        19        324              0.152000       6.078339       0.164864       0.244529       0.144000       0.210800   -9999.000000       0.294000
53970     53970     shanxi         112.0875       35.6639           97       168     2012      11        20        325              0.152583       6.430054       0.021210       0.244826       0.144000       0.156100       0.070600   -9999.000000
53970     53970     shanxi         112.0875       35.6639           97       168     2012      11        21        326              0.153417       5.328979       0.000000       0.248301       0.125000       0.111500       0.050400       0.315000
53970     53970     shanxi         112.0875       35.6639           97       168     2012      11        22        327              0.152583       6.106415       0.000000       0.248085       0.129000   -9999.000000       0.065700   -9999.000000
53970     53970     shanxi         112.0875       35.6639           97       168     2012      11        23        328              0.151333       3.923309       0.000000       0.238805       0.121000   -9999.000000       0.064900   -9999.000000
53970     53970     shanxi         112.0875       35.6639           97       168     2012      11        24        329              0.150667       2.577698       0.196561       0.224667   -9999.000000       0.108300       0.066800       0.277000
53970     53970     shanxi         112.0875       35.6639           97       168     2012      11        25        330              0.151208       4.215851       0.039409       0.239217   -9999.000000   -9999.000000   -9999.000000   -9999.000000
53970     53970     shanxi         112.0875       35.6639           97       168     2012      11        26        331              0.149917       2.145813       0.000000       0.225092       0.107000       0.028900   -9999.000000       0.108000
53970     53970     shanxi         112.0875       35.6639           97       168     2012      11        27        332              0.149833       1.899841       0.000000       0.216872       0.134000   -9999.000000       0.054200   -9999.000000
53970     53970     shanxi         112.0875       35.6639           97       168     2012      11        28        333              0.150000       3.416565       0.000000       0.225504       0.123000   -9999.000000       0.058100       0.008000
53970     53970     shanxi         112.0875       35.6639           97       168     2012      11        29        334              0.148292       0.770111       0.000000       0.205882   -9999.000000       0.080500       0.058500       0.040000
53970     53970     shanxi         112.0875       35.6639           97       168     2012      11        30        335              0.147875       0.803802       0.000000       0.203266   -9999.000000   -9999.000000       0.058900       0.229000
53970     53970     shanxi         112.0875       35.6639           97       168     2012      12        01        336              0.149667       2.196564       0.302931       0.216249   -9999.000000       0.099800   -9999.000000       0.140000
53970     53970     shanxi         112.0875       35.6639           97       168     2012      12        02        337              0.148833      -0.150574       0.000000       0.201201       0.135000       0.153800       0.049500   -9999.000000
53970     53970     shanxi         112.0875       35.6639           97       168     2012      12        03        338              0.149458       1.428162       0.000000       0.213569       0.127000       0.126500       0.058700       0.103000
53970     53970     shanxi         112.0875       35.6639           97       168     2012      12        04        339              0.147958       0.489532       0.000000       0.201578       0.122000       0.041600       0.054800       0.161000
53970     53970     shanxi         112.0875       35.6639           97       168     2012      12        05        340              0.149042       1.921783       0.000000       0.213602   -9999.000000   -9999.000000       0.057600       0.123000
53970     53970     shanxi         112.0875       35.6639           97       168     2012      12        06        341              0.147917      -0.073639       0.000000       0.194653   -9999.000000       0.158300   -9999.000000       0.090000
53970     53970     shanxi         112.0875       35.6639           97       168     2012      12        07        342              0.150000       1.093536       0.000000       0.206569       0.105000       0.141100       0.058700   -9999.000000
53970     53970     shanxi         112.0875       35.6639           97       168     2012      12        08        343              0.146625       0.567780       0.000000       0.200445       0.125000   -9999.000000       0.046700       0.012000
53970     53970     shanxi         112.0875       35.6639           97       168     2012      12        09        344              0.142458      -1.485657       0.000000       0.181837       0.123000       0.006800       0.057400       0.069000
53970     53970     shanxi         112.0875       35.6639           97       168     2012      12        10        345              0.138917      -0.188171       0.000000       0.190379   -9999.000000   -9999.000000       0.045600       0.172000
53970     53970     shanxi         112.0875       35.6639           97       168     2012      12        11        346              0.133583      -0.034302       0.000000       0.192430   -9999.000000       0.089100       0.051100       0.045000
53970     53970     shanxi         112.0875       35.6639           97       168     2012      12        12        347              0.130792      -0.597412       0.000000       0.189165       0.097000       0.051000   -9999.000000   -9999.000000
53970     53970     shanxi         112.0875       35.6639           97       168     2012      12        13        348              0.135125       0.160828       0.095090       0.193365   -9999.000000       0.130400       0.047400       0.038000
53970     53970     shanxi         112.0875       35.6639           97       168     2012      12        14        349              0.141375      -0.421265       0.000000       0.192777   -9999.000000   -9999.000000       0.049500       0.082000
53970     53970     shanxi         112.0875       35.6639           97       168     2012      12        15        350              0.000000      -0.158295       0.000000       0.195835   -9999.000000   -9999.000000       0.051700       0.233000
53970     53970     shanxi         112.0875       35.6639           97       168     2012      12        16        351              0.151458       0.196777       0.000000       0.200356   -9999.000000       0.036700       0.054800       0.280000
53970     53970     shanxi         112.0875       35.6639           97       168     2012      12        17        352              0.153000       0.041260       0.000000       0.200828   -9999.000000       0.100200       0.053800   -9999.000000
53970     53970     shanxi         112.0875       35.6639           97       168     2012      12        18        353              0.153000       0.244720       0.000000       0.203659       0.108000   -9999.000000   -9999.000000       0.018000
53970     53970     shanxi         112.0875       35.6639           97       168     2012      12        19        354              0.152400       0.067352       2.423444       0.196893   -9999.000000       0.199800       0.047900   -9999.000000
53970     53970     shanxi         112.0875       35.6639           97       168     2012      12        20        355              0.000000      -0.729004       0.780510       0.189098   -9999.000000   -9999.000000       0.057000       0.103000
53970     53970     shanxi         112.0875       35.6639           97       168     2012      12        21        356              0.148750      -2.405914       0.000000       0.171113   -9999.000000   -9999.000000       0.054200   -9999.000000
53970     53970     shanxi         112.0875       35.6639           97       168     2012      12        22        357              0.138292      -2.543732       0.000000       0.174095   -9999.000000       0.036500       0.056600   -9999.000000
53970     53970     shanxi         112.0875       35.6639           97       168     2012      12        23        358              0.126708      -5.754639       0.000000       0.155487   -9999.000000   -9999.000000   -9999.000000       0.055000
53970     53970     shanxi         112.0875       35.6639           97       168     2012      12        24        359              0.124722      -6.763153       0.000000       0.144865   -9999.000000       0.145100       0.047200   -9999.000000
53970     53970     shanxi         112.0875       35.6639           97       168     2012      12        25        360              0.125125      -4.016449       0.000000       0.162233   -9999.000000       0.138000       0.047700       0.025000
53970     53970     shanxi         112.0875       35.6639           97       168     2012      12        26        361              0.000000      -3.480743       0.000000       0.166491   -9999.000000   -9999.000000       0.051400   -9999.000000
53970     53970     shanxi         112.0875       35.6639           97       168     2012      12        27        362              0.124077      -3.152618       0.000000       0.167938   -9999.000000       0.050500       0.052500       0.017000
53970     53970     shanxi         112.0875       35.6639           97       168     2012      12        28        363              0.126000      -2.481537       0.000000       0.173141   -9999.000000   -9999.000000       0.050600   -9999.000000
53970     53970     shanxi         112.0875       35.6639           97       168     2012      12        29        364              0.000000      -3.811676       0.000000       0.161786   -9999.000000       0.112800   -9999.000000       0.007000
53970     53970     shanxi         112.0875       35.6639           97       168     2012      12        30        365              0.000000      -7.233246       0.000000       0.146570   -9999.000000       0.176700       0.040400       0.029000
53970     53970     shanxi         112.0875       35.6639           97       168     2012      12        31        366              0.123000      -5.355713       0.025155       0.151702   -9999.000000   -9999.000000       0.047000   -9999.000000
