# Supplementary material for: Research on Fusing Multisatellite Soil Moisture Data Based on Bayesian Model Averaging
Source: Hindawi journal article supplement (doi:10.1155/2018/9310838), 2018-06-25
Supplement: f1 [file 9310838.f1.zip › 2012_sm00-10cm_daily_ZDB_ZHY_53973_366days_allin.txt]

53973     53973     shanxi         112.9914       35.7622           97       172     2012      01        01        001              0.000000   -9999.000000       0.000000   -9999.000000       0.072000   -9999.000000       0.022600   -9999.000000
53973     53973     shanxi         112.9914       35.7622           97       172     2012      01        02        002              0.064292      -2.396820       0.073899       0.172081   -9999.000000   -9999.000000       0.036800       0.163000
53973     53973     shanxi         112.9914       35.7622           97       172     2012      01        03        003              0.000000      -2.528198       0.607656       0.172636   -9999.000000       0.087000   -9999.000000       0.082000
53973     53973     shanxi         112.9914       35.7622           97       172     2012      01        04        004              0.055292      -4.729370       0.200073       0.162321   -9999.000000       0.093400       0.023900   -9999.000000
53973     53973     shanxi         112.9914       35.7622           97       172     2012      01        05        005              0.054250      -5.929626       0.000000       0.155650   -9999.000000   -9999.000000       0.026200       0.076000
53973     53973     shanxi         112.9914       35.7622           97       172     2012      01        06        006              0.053792      -4.737885       0.000000       0.161569   -9999.000000   -9999.000000       0.037400       0.123000
53973     53973     shanxi         112.9914       35.7622           97       172     2012      01        07        007              0.055500      -3.811096       0.000000       0.165539   -9999.000000       0.091100       0.037400       0.137000
53973     53973     shanxi         112.9914       35.7622           97       172     2012      01        08        008              0.000000      -3.853455       0.000000       0.163087       0.080000       0.051100       0.037200       0.059000
53973     53973     shanxi         112.9914       35.7622           97       172     2012      01        09        009              0.057708      -2.803009       0.000000       0.170386       0.083000   -9999.000000   -9999.000000   -9999.000000
53973     53973     shanxi         112.9914       35.7622           97       172     2012      01        10        010              0.059833      -1.801880       0.000000       0.175820   -9999.000000       0.002500       0.010000       0.089000
53973     53973     shanxi         112.9914       35.7622           97       172     2012      01        11        011              0.054167      -1.724518       0.000000       0.176309   -9999.000000   -9999.000000       0.029700   -9999.000000
53973     53973     shanxi         112.9914       35.7622           97       172     2012      01        12        012              0.055542      -3.308228       0.000000       0.168262       0.095000       0.075000       0.017700       0.142000
53973     53973     shanxi         112.9914       35.7622           97       172     2012      01        13        013              0.059125      -2.067688       0.000000       0.173349       0.085000   -9999.000000       0.027900   -9999.000000
53973     53973     shanxi         112.9914       35.7622           97       172     2012      01        14        014              0.059375      -1.306030       0.000000       0.177520   -9999.000000   -9999.000000   -9999.000000   -9999.000000
53973     53973     shanxi         112.9914       35.7622           97       172     2012      01        15        015              0.068875      -1.421387       0.000000       0.177137   -9999.000000   -9999.000000       0.029200       0.117000
53973     53973     shanxi         112.9914       35.7622           97       172     2012      01        16        016              0.065917      -0.982971       0.211965       0.179769   -9999.000000       0.049900       0.010000   -9999.000000
53973     53973     shanxi         112.9914       35.7622           97       172     2012      01        17        017              0.000000      -2.529999       0.000000       0.171751       0.089000   -9999.000000       0.029100       0.166000
53973     53973     shanxi         112.9914       35.7622           97       172     2012      01        18        018              0.067458      -0.884705       0.000000       0.180657       0.091000   -9999.000000       0.022700   -9999.000000
53973     53973     shanxi         112.9914       35.7622           97       172     2012      01        19        019              0.079083      -0.660461       0.000000       0.182959       0.089000   -9999.000000       0.029000       0.040000
53973     53973     shanxi         112.9914       35.7622           97       172     2012      01        20        020              0.073583      -0.406769       0.000000       0.184860   -9999.000000   -9999.000000   -9999.000000       0.216000
53973     53973     shanxi         112.9914       35.7622           97       172     2012      01        21        021              0.061667      -2.507599       0.000000       0.173737   -9999.000000       0.056100       0.016800       0.066000
53973     53973     shanxi         112.9914       35.7622           97       172     2012      01        22        022              0.055375      -4.780273       2.418607       0.158839   -9999.000000       0.095400       0.015000       0.108000
53973     53973     shanxi         112.9914       35.7622           97       172     2012      01        23        023              0.051792      -6.875458       0.000000       0.149637   -9999.000000   -9999.000000       0.016900   -9999.000000
53973     53973     shanxi         112.9914       35.7622           97       172     2012      01        24        024              0.049167      -6.181915       0.000000       0.153205   -9999.000000   -9999.000000   -9999.000000       0.077000
53973     53973     shanxi         112.9914       35.7622           97       172     2012      01        25        025              0.049875      -6.499237       0.000000       0.152788   -9999.000000       0.040400       0.030400       0.133000
53973     53973     shanxi         112.9914       35.7622           97       172     2012      01        26        026              0.055542      -4.832947       0.000000       0.160477   -9999.000000       0.005900   -9999.000000       0.214000
53973     53973     shanxi         112.9914       35.7622           97       172     2012      01        27        027              0.058958      -1.729980       0.000000       0.174651       0.088000   -9999.000000       0.010000       0.092000
53973     53973     shanxi         112.9914       35.7622           97       172     2012      01        28        028              0.059875      -1.027985       0.000000       0.178868       0.097000       0.008200       0.031800   -9999.000000
53973     53973     shanxi         112.9914       35.7622           97       172     2012      01        29        029              0.057042      -0.786743       0.000000       0.180505   -9999.000000   -9999.000000       0.020800       0.118000
53973     53973     shanxi         112.9914       35.7622           97       172     2012      01        30        030              0.060458      -2.364929       0.000000       0.171588       0.093000       0.070100       0.033800       0.133000
53973     53973     shanxi         112.9914       35.7622           97       172     2012      01        31        031              0.075750      -1.413818       0.000000       0.177799   -9999.000000       0.048700   -9999.000000       0.261000
53973     53973     shanxi         112.9914       35.7622           97       172     2012      02        01        032              0.064500       1.403442       0.000000       0.187963   -9999.000000   -9999.000000       0.031000       0.116000
53973     53973     shanxi         112.9914       35.7622           97       172     2012      02        02        033              0.056000      -3.081696       0.000000       0.171706       0.084000   -9999.000000       0.010800   -9999.000000
53973     53973     shanxi         112.9914       35.7622           97       172     2012      02        03        034              0.063042      -3.520752       0.000000       0.167488       0.089000       0.106900       0.033100       0.090000
53973     53973     shanxi         112.9914       35.7622           97       172     2012      02        04        035              0.061500      -0.778839       0.000000       0.177747   -9999.000000       0.014900       0.027300       0.178000
53973     53973     shanxi         112.9914       35.7622           97       172     2012      02        05        036              0.074042      -1.447083       0.000000       0.176824   -9999.000000       0.005500       0.037100       0.292000
53973     53973     shanxi         112.9914       35.7622           97       172     2012      02        06        037              0.073583       0.152740       0.000000       0.184180   -9999.000000   -9999.000000   -9999.000000       0.050000
53973     53973     shanxi         112.9914       35.7622           97       172     2012      02        07        038              0.060500      -1.666962       0.137520       0.177468       0.076000       0.095700       0.016900   -9999.000000
53973     53973     shanxi         112.9914       35.7622           97       172     2012      02        08        039              0.052917      -3.358856       0.000000       0.167172   -9999.000000       0.110900       0.034100       0.118000
53973     53973     shanxi         112.9914       35.7622           97       172     2012      02        09        040              0.056083      -5.451477       0.000000       0.153074   -9999.000000       0.100600       0.020400   -9999.000000
53973     53973     shanxi         112.9914       35.7622           97       172     2012      02        10        041              0.060583      -3.260773       0.000000       0.164566   -9999.000000       0.007700       0.031200       0.199000
53973     53973     shanxi         112.9914       35.7622           97       172     2012      02        11        042              0.069708      -2.051453       0.000000       0.171717   -9999.000000   -9999.000000       0.034100   -9999.000000
53973     53973     shanxi         112.9914       35.7622           97       172     2012      02        12        043              0.065958       0.128510       0.000000       0.178102   -9999.000000   -9999.000000   -9999.000000   -9999.000000
53973     53973     shanxi         112.9914       35.7622           97       172     2012      02        13        044              0.068542      -1.684113       0.000000       0.174068   -9999.000000       0.015400   -9999.000000       0.217000
53973     53973     shanxi         112.9914       35.7622           97       172     2012      02        14        045              0.082833      -0.403625       0.000000       0.178358   -9999.000000   -9999.000000       0.033900   -9999.000000
53973     53973     shanxi         112.9914       35.7622           97       172     2012      02        15        046              0.082708       1.345795       0.000000       0.184784       0.076000   -9999.000000       0.027500       0.261000
53973     53973     shanxi         112.9914       35.7622           97       172     2012      02        16        047              0.074833       0.447510       0.000000       0.183236   -9999.000000   -9999.000000       0.032000   -9999.000000
53973     53973     shanxi         112.9914       35.7622           97       172     2012      02        17        048              0.068542      -0.403198       0.000000       0.177297       0.072000   -9999.000000   -9999.000000       0.086000
53973     53973     shanxi         112.9914       35.7622           97       172     2012      02        18        049              0.068750      -1.193207       0.000000       0.172660       0.084000       0.040700       0.032000       0.235000
53973     53973     shanxi         112.9914       35.7622           97       172     2012      02        19        050              0.076458      -0.975616       0.000000       0.171556       0.077000   -9999.000000       0.017500       0.337000
53973     53973     shanxi         112.9914       35.7622           97       172     2012      02        20        051              0.101125       0.891815       0.000000       0.175302       0.083000   -9999.000000       0.031800       0.377000
53973     53973     shanxi         112.9914       35.7622           97       172     2012      02        21        052              0.116000       2.513397       0.000000       0.180700   -9999.000000       0.033500   -9999.000000   -9999.000000
53973     53973     shanxi         112.9914       35.7622           97       172     2012      02        22        053              0.146125       2.167206       0.000000       0.181146   -9999.000000   -9999.000000       0.036200       0.230000
53973     53973     shanxi         112.9914       35.7622           97       172     2012      02        23        054              0.174875       4.517487       0.000000       0.184487       0.073000       0.045400   -9999.000000       0.326000
53973     53973     shanxi         112.9914       35.7622           97       172     2012      02        24        055              0.175708       2.780792       0.000000       0.179826       0.080000   -9999.000000       0.017900       0.360000
53973     53973     shanxi         112.9914       35.7622           97       172     2012      02        25        056              0.164083       2.074738       0.000000       0.179385   -9999.000000       0.114500       0.031900       0.235000
53973     53973     shanxi         112.9914       35.7622           97       172     2012      02        26        057              0.139500      -0.547089       0.000000       0.174126   -9999.000000       0.075000       0.023400   -9999.000000
53973     53973     shanxi         112.9914       35.7622           97       172     2012      02        27        058              0.123750      -0.290253       0.000000       0.173459   -9999.000000       0.155500   -9999.000000       0.283000
53973     53973     shanxi         112.9914       35.7622           97       172     2012      02        28        059              0.136792       1.433044       0.000000       0.176978       0.066000       0.035800       0.030800       0.350000
53973     53973     shanxi         112.9914       35.7622           97       172     2012      02        29        060              0.000000   -9999.000000       0.000000   -9999.000000       0.078000   -9999.000000   -9999.000000   -9999.000000
53973     53973     shanxi         112.9914       35.7622           97       172     2012      03        01        061              0.168417       2.051453       0.360024       0.178568   -9999.000000   -9999.000000       0.010000       0.616000
53973     53973     shanxi         112.9914       35.7622           97       172     2012      03        02        062              0.177625       1.058990       0.321548       0.180783   -9999.000000   -9999.000000       0.032200   -9999.000000
53973     53973     shanxi         112.9914       35.7622           97       172     2012      03        03        063              0.179292       1.172607       0.912556       0.182796   -9999.000000   -9999.000000       0.027900       0.304000
53973     53973     shanxi         112.9914       35.7622           97       172     2012      03        04        064              0.180000       0.252167       0.000000       0.179971   -9999.000000       0.047000       0.044000       0.353000
53973     53973     shanxi         112.9914       35.7622           97       172     2012      03        05        065              0.180250       0.782196       0.000000       0.180844       0.105000   -9999.000000   -9999.000000       0.606000
53973     53973     shanxi         112.9914       35.7622           97       172     2012      03        06        066              0.175583       2.392426       0.000000       0.184171       0.096000   -9999.000000       0.027700       0.244000
53973     53973     shanxi         112.9914       35.7622           97       172     2012      03        07        067              0.000000       1.715698       0.000000       0.180391       0.093000       0.043200       0.016700   -9999.000000
53973     53973     shanxi         112.9914       35.7622           97       172     2012      03        08        068              0.174417       5.097168       0.000000       0.181759   -9999.000000   -9999.000000       0.033000       0.260000
53973     53973     shanxi         112.9914       35.7622           97       172     2012      03        09        069              0.171250       3.105835       0.000000       0.177857   -9999.000000   -9999.000000       0.030500   -9999.000000
53973     53973     shanxi         112.9914       35.7622           97       172     2012      03        10        070              0.170292       3.409454       0.000000       0.176858       0.092000   -9999.000000       0.037000       0.303000
53973     53973     shanxi         112.9914       35.7622           97       172     2012      03        11        071              0.165708       5.950195       0.000000       0.176510       0.082000   -9999.000000   -9999.000000   -9999.000000
53973     53973     shanxi         112.9914       35.7622           97       172     2012      03        12        072              0.162875       2.736572       0.000000       0.171475       0.082000   -9999.000000       0.013100   -9999.000000
53973     53973     shanxi         112.9914       35.7622           97       172     2012      03        13        073              0.166458       4.030121       1.113966       0.171763   -9999.000000   -9999.000000       0.034300       0.337000
53973     53973     shanxi         112.9914       35.7622           97       172     2012      03        14        074              0.168478       8.384338       0.000000       0.172171   -9999.000000       0.102500   -9999.000000   -9999.000000
53973     53973     shanxi         112.9914       35.7622           97       172     2012      03        15        075              0.168708       8.415985       0.390787       0.170575       0.084000       0.124300       0.044200       0.536000
53973     53973     shanxi         112.9914       35.7622           97       172     2012      03        16        076              0.169750       4.492432       0.000000       0.172248       0.083000   -9999.000000   -9999.000000   -9999.000000
53973     53973     shanxi         112.9914       35.7622           97       172     2012      03        17        077              0.166625       8.618469       0.000000       0.172266       0.078000   -9999.000000   -9999.000000       0.346000
53973     53973     shanxi         112.9914       35.7622           97       172     2012      03        18        078              0.162625      11.169708       0.000000       0.169494   -9999.000000   -9999.000000       0.010000       0.293000
53973     53973     shanxi         112.9914       35.7622           97       172     2012      03        19        079              0.161625       8.789429       0.000000       0.168371   -9999.000000   -9999.000000       0.038900       0.397000
53973     53973     shanxi         112.9914       35.7622           97       172     2012      03        20        080              0.160917       1.597565       0.237032       0.170231       0.069000       0.075100       0.036400       0.340000
53973     53973     shanxi         112.9914       35.7622           97       172     2012      03        21        081              0.185000       4.091064       1.481372       0.173136   -9999.000000   -9999.000000       0.062400   -9999.000000
53973     53973     shanxi         112.9914       35.7622           97       172     2012      03        22        082              0.184667       1.608215       0.140364       0.186228   -9999.000000       0.081100   -9999.000000       0.689000
53973     53973     shanxi         112.9914       35.7622           97       172     2012      03        23        083              0.175417       3.416687       0.359147       0.199049   -9999.000000   -9999.000000       0.032200       0.401000
53973     53973     shanxi         112.9914       35.7622           97       172     2012      03        24        084              0.169500       5.581635       0.888435       0.190428   -9999.000000   -9999.000000   -9999.000000       0.518000
53973     53973     shanxi         112.9914       35.7622           97       172     2012      03        25        085              0.000000      10.010986       0.000000       0.182643       0.087000       0.023300       0.042000       0.354000
53973     53973     shanxi         112.9914       35.7622           97       172     2012      03        26        086              0.176125      11.758789       0.000000       0.174166       0.088000   -9999.000000       0.037500   -9999.000000
53973     53973     shanxi         112.9914       35.7622           97       172     2012      03        27        087              0.179792      13.341522       0.000000       0.168638       0.078000   -9999.000000       0.045100       0.388000
53973     53973     shanxi         112.9914       35.7622           97       172     2012      03        28        088              0.179667      15.073853       0.499315       0.164764       0.082000   -9999.000000   -9999.000000       0.332000
53973     53973     shanxi         112.9914       35.7622           97       172     2012      03        29        089              0.181583      14.925690       0.000000       0.163942       0.087000   -9999.000000       0.022000       0.543000
53973     53973     shanxi         112.9914       35.7622           97       172     2012      03        30        090              0.169875      15.856415       1.301834       0.163971   -9999.000000       0.005500       0.043700       0.233000
53973     53973     shanxi         112.9914       35.7622           97       172     2012      03        31        091              0.163292       9.975525       0.000000       0.163308       0.075000   -9999.000000       0.032600   -9999.000000
53973     53973     shanxi         112.9914       35.7622           97       172     2012      04        01        092              0.160708      13.377808       0.000000       0.161388       0.081000       0.091600       0.041100       0.249000
53973     53973     shanxi         112.9914       35.7622           97       172     2012      04        02        093              0.153083      15.251251       0.241961       0.160611       0.087000   -9999.000000   -9999.000000       0.308000
53973     53973     shanxi         112.9914       35.7622           97       172     2012      04        03        094              0.153833       8.948639       0.000000       0.165509   -9999.000000   -9999.000000       0.046500       0.430000
53973     53973     shanxi         112.9914       35.7622           97       172     2012      04        04        095              0.162000      12.318024       0.000000       0.162559   -9999.000000       0.031100       0.013200       0.274000
53973     53973     shanxi         112.9914       35.7622           97       172     2012      04        05        096              0.161458      15.740784       0.000000       0.159654       0.069000   -9999.000000       0.044400   -9999.000000
53973     53973     shanxi         112.9914       35.7622           97       172     2012      04        06        097              0.155708      16.395752       0.000000       0.158019       0.079000   -9999.000000       0.031700       0.254000
53973     53973     shanxi         112.9914       35.7622           97       172     2012      04        07        098              0.152333      17.033508       0.000000       0.157420       0.078000       0.028300       0.041300   -9999.000000
53973     53973     shanxi         112.9914       35.7622           97       172     2012      04        08        099              0.154333      17.915283       0.000000       0.156890   -9999.000000   -9999.000000   -9999.000000       0.337000
53973     53973     shanxi         112.9914       35.7622           97       172     2012      04        09        100              0.149667      19.784637       0.265594       0.156298       0.119000       0.116600       0.053000   -9999.000000
53973     53973     shanxi         112.9914       35.7622           97       172     2012      04        10        101              0.148667      15.679352       0.213731       0.160007       0.089000   -9999.000000       0.050100   -9999.000000
53973     53973     shanxi         112.9914       35.7622           97       172     2012      04        11        102              0.148208      16.101196       0.000000       0.163585       0.110500   -9999.000000       0.082200       0.324000
53973     53973     shanxi         112.9914       35.7622           97       172     2012      04        12        103              0.148750      16.733582       0.354417       0.162250       0.105000   -9999.000000       0.050500   -9999.000000
53973     53973     shanxi         112.9914       35.7622           97       172     2012      04        13        104              0.147375      12.488281       0.000000       0.161380       0.086000   -9999.000000       0.047800       0.347000
53973     53973     shanxi         112.9914       35.7622           97       172     2012      04        14        105              0.141417      17.781097       0.370227       0.158147       0.093000       0.100900   -9999.000000   -9999.000000
53973     53973     shanxi         112.9914       35.7622           97       172     2012      04        15        106              0.142125      16.459473       0.000000       0.157125       0.085000   -9999.000000       0.018900       0.284000
53973     53973     shanxi         112.9914       35.7622           97       172     2012      04        16        107              0.141250      19.984772       0.000000       0.155859       0.086000   -9999.000000       0.051100       0.337000
53973     53973     shanxi         112.9914       35.7622           97       172     2012      04        17        108              0.139208      18.291016       0.000000       0.155918       0.078000       0.006200       0.035000       0.438000
53973     53973     shanxi         112.9914       35.7622           97       172     2012      04        18        109              0.138750      17.799316       0.000000       0.156641       0.076000   -9999.000000   -9999.000000       0.326000
53973     53973     shanxi         112.9914       35.7622           97       172     2012      04        19        110              0.140042      18.860901       7.499493       0.156219       0.103000       0.072400   -9999.000000   -9999.000000
53973     53973     shanxi         112.9914       35.7622           97       172     2012      04        20        111              0.174833      20.825836       2.821233       0.188759   -9999.000000       0.067400       0.068100       0.417000
53973     53973     shanxi         112.9914       35.7622           97       172     2012      04        21        112              0.177417      15.390625       1.212858       0.259710       0.107500   -9999.000000       0.034400       0.707000
53973     53973     shanxi         112.9914       35.7622           97       172     2012      04        22        113              0.171542      17.019836       0.000000       0.243713       0.097500       0.118100       0.056600       0.575000
53973     53973     shanxi         112.9914       35.7622           97       172     2012      04        23        114              0.168000      20.245239       1.058447       0.221772       0.093000   -9999.000000       0.041600       0.433000
53973     53973     shanxi         112.9914       35.7622           97       172     2012      04        24        115              0.192458      22.043274       2.330664       0.209474   -9999.000000   -9999.000000       0.088000   -9999.000000
53973     53973     shanxi         112.9914       35.7622           97       172     2012      04        25        116              0.000000      13.314301       0.000000       0.237525   -9999.000000       0.257500   -9999.000000       0.864000
53973     53973     shanxi         112.9914       35.7622           97       172     2012      04        26        117              0.170667      14.171448       0.809635       0.214851       0.091000       0.205500       0.046800       0.437000
53973     53973     shanxi         112.9914       35.7622           97       172     2012      04        27        118              0.168750      18.729126       0.000000       0.194713       0.092500       0.064300   -9999.000000       0.492000
53973     53973     shanxi         112.9914       35.7622           97       172     2012      04        28        119              0.164417      21.002960       0.000000       0.179088       0.088000   -9999.000000       0.055800       0.391000
53973     53973     shanxi         112.9914       35.7622           97       172     2012      04        29        120              0.161500      21.564850       0.000000       0.171486   -9999.000000       0.128900       0.048900   -9999.000000
53973     53973     shanxi         112.9914       35.7622           97       172     2012      04        30        121              0.157250      21.528564       0.000000       0.168398       0.101000       0.071500   -9999.000000       0.375000
53973     53973     shanxi         112.9914       35.7622           97       172     2012      05        01        122              0.156500      20.605255       0.000000       0.167629       0.105000   -9999.000000   -9999.000000       0.343000
53973     53973     shanxi         112.9914       35.7622           97       172     2012      05        02        123              0.154667      21.845703       0.238098       0.165027       0.112000       0.137600       0.026700       0.472000
53973     53973     shanxi         112.9914       35.7622           97       172     2012      05        03        124              0.151542      22.536285       0.000000       0.163098       0.101000   -9999.000000       0.056300       0.371000
53973     53973     shanxi         112.9914       35.7622           97       172     2012      05        04        125              0.148917      23.012726       0.795985       0.160700       0.101000   -9999.000000       0.039400   -9999.000000
53973     53973     shanxi         112.9914       35.7622           97       172     2012      05        05        126              0.145500      25.020508       0.303369       0.158191       0.119000   -9999.000000       0.049100       0.337000
53973     53973     shanxi         112.9914       35.7622           97       172     2012      05        06        127              0.142542      26.007996       0.036141       0.157159   -9999.000000   -9999.000000   -9999.000000   -9999.000000
53973     53973     shanxi         112.9914       35.7622           97       172     2012      05        07        128              0.136250      26.583771       0.137696       0.155856   -9999.000000       0.123700       0.052600       0.405000
53973     53973     shanxi         112.9914       35.7622           97       172     2012      05        08        129              0.137125      24.419403       0.041255       0.156880       0.096000   -9999.000000       0.029700   -9999.000000
53973     53973     shanxi         112.9914       35.7622           97       172     2012      05        09        130              0.137042      25.577545       0.131828       0.156577       0.096000       0.187400       0.057200   -9999.000000
53973     53973     shanxi         112.9914       35.7622           97       172     2012      05        10        131              0.139208      24.438232       0.000000       0.156502       0.127000   -9999.000000       0.037500       0.425000
53973     53973     shanxi         112.9914       35.7622           97       172     2012      05        11        132              0.139458      26.373535       4.917494       0.154962       0.180000   -9999.000000       0.050500   -9999.000000
53973     53973     shanxi         112.9914       35.7622           97       172     2012      05        12        133              0.141250      22.926666       0.000000       0.190173       0.140500       0.159900   -9999.000000       0.339000
53973     53973     shanxi         112.9914       35.7622           97       172     2012      05        13        134              0.142000      17.973114       0.038795       0.209451       0.117000       0.156400       0.036500   -9999.000000
53973     53973     shanxi         112.9914       35.7622           97       172     2012      05        14        135              0.138708      20.631927       0.000000       0.183965       0.109000   -9999.000000       0.064600       0.263000
53973     53973     shanxi         112.9914       35.7622           97       172     2012      05        15        136              0.137042      20.846588       0.000000       0.167758       0.141000   -9999.000000       0.046600       0.366000
53973     53973     shanxi         112.9914       35.7622           97       172     2012      05        16        137              0.135917      21.741150       0.396627       0.160324       0.122000   -9999.000000       0.058800       0.474000
53973     53973     shanxi         112.9914       35.7622           97       172     2012      05        17        138              0.136417      22.899902       0.000000       0.157181       0.106000       0.177100       0.059300       0.413000
53973     53973     shanxi         112.9914       35.7622           97       172     2012      05        18        139              0.133167      25.260742       0.000000       0.155060       0.120500       0.052200   -9999.000000   -9999.000000
53973     53973     shanxi         112.9914       35.7622           97       172     2012      05        19        140              0.133042      25.026337       0.338981       0.154473       0.105000   -9999.000000       0.025800       0.314000
53973     53973     shanxi         112.9914       35.7622           97       172     2012      05        20        141              0.131000      26.004303       0.000000       0.153714   -9999.000000       0.202300       0.064400       0.474000
53973     53973     shanxi         112.9914       35.7622           97       172     2012      05        21        142              0.126292      25.302490       0.216495       0.153072       0.157000   -9999.000000       0.047100       0.404000
53973     53973     shanxi         112.9914       35.7622           97       172     2012      05        22        143              0.126083      20.516571       1.848644       0.154882       0.145000   -9999.000000       0.061700       0.481000
53973     53973     shanxi         112.9914       35.7622           97       172     2012      05        23        144              0.132708      19.121521       7.572805       0.182143   -9999.000000   -9999.000000   -9999.000000   -9999.000000
53973     53973     shanxi         112.9914       35.7622           97       172     2012      05        24        145              0.139667      19.464600       0.000000       0.232444       0.160000   -9999.000000       0.074000       0.934000
53973     53973     shanxi         112.9914       35.7622           97       172     2012      05        25        146              0.000000      18.995758       0.000000       0.230997       0.131000       0.181300       0.031700       0.488000
53973     53973     shanxi         112.9914       35.7622           97       172     2012      05        26        147              0.139583      21.664154       1.470177       0.201673       0.155000   -9999.000000       0.069900       0.545000
53973     53973     shanxi         112.9914       35.7622           97       172     2012      05        27        148              0.139292      21.983765       0.000000       0.197510       0.144000       0.293000       0.045300       0.492000
53973     53973     shanxi         112.9914       35.7622           97       172     2012      05        28        149              0.137000      25.067291       3.537092       0.180246       0.131000   -9999.000000       0.058700   -9999.000000
53973     53973     shanxi         112.9914       35.7622           97       172     2012      05        29        150              0.151208      24.403656       3.597097       0.178977       0.144000   -9999.000000   -9999.000000       0.784000
53973     53973     shanxi         112.9914       35.7622           97       172     2012      05        30        151              0.150375      19.472229       0.000000       0.246835       0.120000       0.244800       0.039700   -9999.000000
53973     53973     shanxi         112.9914       35.7622           97       172     2012      05        31        152              0.144917      22.533783       0.000000       0.208199       0.149000       0.083900   -9999.000000   -9999.000000
53973     53973     shanxi         112.9914       35.7622           97       172     2012      06        01        153              0.159875      22.139160      17.967930       0.188795   -9999.000000   -9999.000000       0.046900       0.370000
53973     53973     shanxi         112.9914       35.7622           97       172     2012      06        02        154              0.177167      22.869659       0.228010       0.259066       0.135500       0.073600       0.069100   -9999.000000
53973     53973     shanxi         112.9914       35.7622           97       172     2012      06        03        155              0.165833      22.520447       0.000000       0.275497       0.139000   -9999.000000       0.058900       0.472000
53973     53973     shanxi         112.9914       35.7622           97       172     2012      06        04        156              0.162000      22.614258       0.000000       0.239025       0.121000       0.162400   -9999.000000   -9999.000000
53973     53973     shanxi         112.9914       35.7622           97       172     2012      06        05        157              0.157000      25.296997       2.448151       0.213464   -9999.000000       0.138100       0.031900       0.498000
53973     53973     shanxi         112.9914       35.7622           97       172     2012      06        06        158              0.146500      24.834137       0.822686       0.217680       0.144000   -9999.000000       0.076600   -9999.000000
53973     53973     shanxi         112.9914       35.7622           97       172     2012      06        07        159              0.152208      19.172333       0.000000       0.233638       0.115000   -9999.000000       0.053300   -9999.000000
53973     53973     shanxi         112.9914       35.7622           97       172     2012      06        08        160              0.148083      24.749146       0.000000       0.206564       0.124500       0.129000       0.063900       0.533000
53973     53973     shanxi         112.9914       35.7622           97       172     2012      06        09        161              0.148083      25.099335       0.000000       0.187147       0.108000   -9999.000000   -9999.000000   -9999.000000
53973     53973     shanxi         112.9914       35.7622           97       172     2012      06        10        162              0.142417      27.866760       1.669476       0.172780       0.089000   -9999.000000       0.057200       0.557000
53973     53973     shanxi         112.9914       35.7622           97       172     2012      06        11        163              0.000000      28.172943       0.000000       0.167612       0.118000   -9999.000000       0.053200   -9999.000000
53973     53973     shanxi         112.9914       35.7622           97       172     2012      06        12        164              0.136167      27.285675       0.000000       0.162663       0.116500   -9999.000000       0.077700       0.336000
53973     53973     shanxi         112.9914       35.7622           97       172     2012      06        13        165              0.133625      28.469513       0.000000       0.159512       0.130000       0.076600       0.058300       0.593000
53973     53973     shanxi         112.9914       35.7622           97       172     2012      06        14        166              0.127250      30.661987       0.000000       0.157348       0.129000   -9999.000000       0.071900       0.604000
53973     53973     shanxi         112.9914       35.7622           97       172     2012      06        15        167              0.124375      27.854736       0.475632       0.156221       0.126000   -9999.000000   -9999.000000       0.545000
53973     53973     shanxi         112.9914       35.7622           97       172     2012      06        16        168              0.120208      27.672821       0.000000       0.155263       0.121000   -9999.000000       0.046000   -9999.000000
53973     53973     shanxi         112.9914       35.7622           97       172     2012      06        17        169              0.116750      28.216522       0.000000       0.154504       0.128000   -9999.000000       0.077400       0.373000
53973     53973     shanxi         112.9914       35.7622           97       172     2012      06        18        170              0.114958      29.062714       2.847487       0.153444       0.129500   -9999.000000       0.060800       0.590000
53973     53973     shanxi         112.9914       35.7622           97       172     2012      06        19        171              0.112583      30.075562       0.201680       0.153023       0.131000   -9999.000000       0.074000       0.592000
53973     53973     shanxi         112.9914       35.7622           97       172     2012      06        20        172              0.108958      29.931366       0.000000       0.152551       0.126000       0.125200   -9999.000000       0.561000
53973     53973     shanxi         112.9914       35.7622           97       172     2012      06        21        173              0.106625      28.981110       0.853132       0.151619       0.132000   -9999.000000   -9999.000000   -9999.000000
53973     53973     shanxi         112.9914       35.7622           97       172     2012      06        22        174              0.105250      28.213654       0.126318       0.158919       0.132000   -9999.000000       0.034100       0.507000
53973     53973     shanxi         112.9914       35.7622           97       172     2012      06        23        175              0.101875      29.770050      13.668984       0.155192       0.120500       0.118800       0.093300       0.741000
53973     53973     shanxi         112.9914       35.7622           97       172     2012      06        24        176              0.105125      26.361633      16.672388       0.264786       0.188000   -9999.000000       0.065200       1.000000
53973     53973     shanxi         112.9914       35.7622           97       172     2012      06        25        177              0.141625      23.666351       5.727087       0.310129   -9999.000000       0.115200       0.122500       1.000000
53973     53973     shanxi         112.9914       35.7622           97       172     2012      06        26        178              0.166958      22.681793       1.820780       0.304314   -9999.000000       0.234000   -9999.000000   -9999.000000
53973     53973     shanxi         112.9914       35.7622           97       172     2012      06        27        179              0.178833      23.807098       0.310691       0.280783       0.177000       0.144100       0.106600       0.882000
53973     53973     shanxi         112.9914       35.7622           97       172     2012      06        28        180              0.170000      22.817200       4.911720       0.268330       0.177000       0.129900       0.111100       0.774000
53973     53973     shanxi         112.9914       35.7622           97       172     2012      06        29        181              0.201542      23.048645       8.805532       0.265912       0.186000   -9999.000000       0.121200       1.000000
53973     53973     shanxi         112.9914       35.7622           97       172     2012      06        30        182              0.191417      21.702606       0.000000       0.312527       0.149000   -9999.000000       0.090700   -9999.000000
53973     53973     shanxi         112.9914       35.7622           97       172     2012      07        01        183              0.181250      25.387299       0.899363       0.272297       0.160000       0.039200       0.097100   -9999.000000
53973     53973     shanxi         112.9914       35.7622           97       172     2012      07        02        184              0.170208      26.769684       1.222298       0.249794       0.159000       0.040600   -9999.000000       0.808000
53973     53973     shanxi         112.9914       35.7622           97       172     2012      07        03        185              0.162958      26.540344       0.000000       0.239759       0.144500       0.070400       0.084800   -9999.000000
53973     53973     shanxi         112.9914       35.7622           97       172     2012      07        04        186              0.174333      28.049469       9.480568       0.223137       0.215000   -9999.000000       0.152600       0.996000
53973     53973     shanxi         112.9914       35.7622           97       172     2012      07        05        187              0.193708      23.994141       1.305634       0.278551       0.153000   -9999.000000       0.107600   -9999.000000
53973     53973     shanxi         112.9914       35.7622           97       172     2012      07        06        188              0.178333      25.934143       0.000000       0.259409   -9999.000000   -9999.000000       0.124800   -9999.000000
53973     53973     shanxi         112.9914       35.7622           97       172     2012      07        07        189              0.214750      25.932831       7.998394       0.236985   -9999.000000       0.117000   -9999.000000       0.997000
53973     53973     shanxi         112.9914       35.7622           97       172     2012      07        08        190              0.220708      23.356415      47.307022       0.288324   -9999.000000       0.150300       0.164900   -9999.000000
53973     53973     shanxi         112.9914       35.7622           97       172     2012      07        09        191              0.216125      25.449951       8.683931       0.313636       0.240000   -9999.000000       0.120300       1.000000
53973     53973     shanxi         112.9914       35.7622           97       172     2012      07        10        192              0.201875      24.022339       0.241989       0.355105       0.185000   -9999.000000       0.184000   -9999.000000
53973     53973     shanxi         112.9914       35.7622           97       172     2012      07        11        193              0.191667      26.311768       0.000000       0.321840       0.167000       0.257600       0.147800       0.910000
53973     53973     shanxi         112.9914       35.7622           97       172     2012      07        12        194              0.184125      27.168365       0.162011       0.303651   -9999.000000   -9999.000000       0.157900       0.760000
53973     53973     shanxi         112.9914       35.7622           97       172     2012      07        13        195              0.177458      27.728943      10.573771       0.288023       0.191000       0.191000   -9999.000000       0.779000
53973     53973     shanxi         112.9914       35.7622           97       172     2012      07        14        196              0.193750      23.515625       2.272969       0.318946       0.187500       0.131500       0.155200       0.964000
53973     53973     shanxi         112.9914       35.7622           97       172     2012      07        15        197              0.187667      22.748199       3.935300       0.314038       0.191500   -9999.000000       0.153300   -9999.000000
53973     53973     shanxi         112.9914       35.7622           97       172     2012      07        16        198              0.180833      23.693909       0.000000       0.309911       0.171000       0.081700       0.179700       0.909000
53973     53973     shanxi         112.9914       35.7622           97       172     2012      07        17        199              0.175333      23.305908       0.000000       0.298446       0.178000   -9999.000000       0.167000       0.809000
53973     53973     shanxi         112.9914       35.7622           97       172     2012      07        18        200              0.168458      24.692139       0.000000       0.285892       0.178000       0.270300       0.162900       0.824000
53973     53973     shanxi         112.9914       35.7622           97       172     2012      07        19        201              0.161250      25.112732       0.000000       0.276067       0.169000       0.033600   -9999.000000       0.707000
53973     53973     shanxi         112.9914       35.7622           97       172     2012      07        20        202              0.152957      25.836761       0.381647       0.266781       0.166500       0.026400       0.091500   -9999.000000
53973     53973     shanxi         112.9914       35.7622           97       172     2012      07        21        203              0.155043      27.322601      14.318905       0.257336       0.209000       0.053600       0.171200       0.777000
53973     53973     shanxi         112.9914       35.7622           97       172     2012      07        22        204              0.169417      25.898621       0.031613       0.295150       0.209000   -9999.000000       0.143200       0.826000
53973     53973     shanxi         112.9914       35.7622           97       172     2012      07        23        205              0.165792      23.896179       3.027182       0.300908       0.233000       0.200200       0.189600       0.869000
53973     53973     shanxi         112.9914       35.7622           97       172     2012      07        24        206              0.165208      24.957031       0.120878       0.281255       0.236000   -9999.000000   -9999.000000       0.878000
53973     53973     shanxi         112.9914       35.7622           97       172     2012      07        25        207              0.163958      26.356323       0.152632       0.268655       0.196000       0.038200       0.185100   -9999.000000
53973     53973     shanxi         112.9914       35.7622           97       172     2012      07        26        208              0.162042      28.143646       0.000000       0.258623       0.199500       0.023500       0.124500       0.657000
53973     53973     shanxi         112.9914       35.7622           97       172     2012      07        27        209              0.157417      29.186859       0.112048       0.245123       0.185000   -9999.000000       0.197900       0.765000
53973     53973     shanxi         112.9914       35.7622           97       172     2012      07        28        210              0.153042      29.429321       0.873729       0.231734       0.169000       0.208400       0.159500       0.751000
53973     53973     shanxi         112.9914       35.7622           97       172     2012      07        29        211              0.147000      29.953094       0.092415       0.220332       0.212000   -9999.000000       0.186000       0.553000
53973     53973     shanxi         112.9914       35.7622           97       172     2012      07        30        212              0.173083      29.523499      34.496956       0.212623       0.181000   -9999.000000   -9999.000000   -9999.000000
53973     53973     shanxi         112.9914       35.7622           97       172     2012      07        31        213              0.232583      28.862854       7.477817       0.271606       0.298500       0.156000       0.121400       0.970000
53973     53973     shanxi         112.9914       35.7622           97       172     2012      08        01        214              0.223208      24.784271       7.786275       0.343243       0.253000   -9999.000000       0.144600   -9999.000000
53973     53973     shanxi         112.9914       35.7622           97       172     2012      08        02        215              0.207792      24.837830       6.323637       0.331826       0.236000       0.243300       0.124700       0.924000
53973     53973     shanxi         112.9914       35.7622           97       172     2012      08        03        216              0.197542      24.773041       0.146601       0.335884       0.226000       0.062500       0.142500   -9999.000000
53973     53973     shanxi         112.9914       35.7622           97       172     2012      08        04        217              0.190833      24.910400       0.978551       0.313297       0.234000   -9999.000000       0.130800   -9999.000000
53973     53973     shanxi         112.9914       35.7622           97       172     2012      08        05        218              0.188583      25.196533       0.848764       0.304769       0.248000       0.128100   -9999.000000       0.913000
53973     53973     shanxi         112.9914       35.7622           97       172     2012      08        06        219              0.187667      24.689880       0.365368       0.303783       0.243000       0.123600       0.136300   -9999.000000
53973     53973     shanxi         112.9914       35.7622           97       172     2012      08        07        220              0.184708      25.549438       0.000000       0.293774       0.207000       0.136400   -9999.000000       0.821000
53973     53973     shanxi         112.9914       35.7622           97       172     2012      08        08        221              0.178917      26.685760       0.000000       0.282233   -9999.000000       0.040100       0.177900   -9999.000000
53973     53973     shanxi         112.9914       35.7622           97       172     2012      08        09        222              0.169542      27.360413       0.156479       0.273272       0.225000   -9999.000000       0.221700       0.656000
53973     53973     shanxi         112.9914       35.7622           97       172     2012      08        10        223              0.166667      24.282715       0.000000       0.269229       0.187500       0.053900   -9999.000000       0.753000
53973     53973     shanxi         112.9914       35.7622           97       172     2012      08        11        224              0.158375      25.699371       0.000000       0.257926       0.209500       0.156800       0.209100       0.836000
53973     53973     shanxi         112.9914       35.7622           97       172     2012      08        12        225              0.152000      27.015228       7.064170       0.249418       0.198000       0.142000       0.195200       1.000000
53973     53973     shanxi         112.9914       35.7622           97       172     2012      08        13        226              0.181667      24.668488       4.025569       0.276862   -9999.000000       0.095500       0.233700   -9999.000000
53973     53973     shanxi         112.9914       35.7622           97       172     2012      08        14        227              0.207500      21.583099       4.315854       0.301748       0.232000   -9999.000000       0.231600       0.833000
53973     53973     shanxi         112.9914       35.7622           97       172     2012      08        15        228              0.197375      21.868591       0.371295       0.305198       0.218000       0.111600       0.235500       0.815000
53973     53973     shanxi         112.9914       35.7622           97       172     2012      08        16        229              0.183167      24.469696       0.000000       0.284231       0.196500       0.123400   -9999.000000       0.812000
53973     53973     shanxi         112.9914       35.7622           97       172     2012      08        17        230              0.173625      24.560272       1.376676       0.272711       0.221000   -9999.000000       0.174600       0.695000
53973     53973     shanxi         112.9914       35.7622           97       172     2012      08        18        231              0.195917      24.806610      10.961542       0.267842   -9999.000000       0.050300       0.245300   -9999.000000
53973     53973     shanxi         112.9914       35.7622           97       172     2012      08        19        232              0.196333      22.569916       0.784416       0.317820       0.234000   -9999.000000       0.212300       0.949000
53973     53973     shanxi         112.9914       35.7622           97       172     2012      08        20        233              0.193042      23.458252       0.170617       0.298822       0.211000       0.080300       0.237400       0.865000
53973     53973     shanxi         112.9914       35.7622           97       172     2012      08        21        234              0.181708      23.937927       0.000000       0.290284       0.194000       0.045200   -9999.000000       0.906000
53973     53973     shanxi         112.9914       35.7622           97       172     2012      08        22        235              0.165958      23.273987       0.000000       0.276161       0.216000   -9999.000000   -9999.000000   -9999.000000
53973     53973     shanxi         112.9914       35.7622           97       172     2012      08        23        236              0.151125      21.137024       0.000000       0.264551       0.198000       0.192000       0.111900   -9999.000000
53973     53973     shanxi         112.9914       35.7622           97       172     2012      08        24        237              0.154625      19.504974       0.000000       0.256242       0.197000       0.169600       0.247600       0.714000
53973     53973     shanxi         112.9914       35.7622           97       172     2012      08        25        238              0.000000      21.503052       0.000000       0.247965       0.221000       0.136500       0.191500       0.711000
53973     53973     shanxi         112.9914       35.7622           97       172     2012      08        26        239              0.155250      21.689941       0.000000       0.241605       0.208000       0.100400       0.220600       0.722000
53973     53973     shanxi         112.9914       35.7622           97       172     2012      08        27        240              0.152542      23.151062       0.000000       0.234391       0.235500   -9999.000000   -9999.000000       0.607000
53973     53973     shanxi         112.9914       35.7622           97       172     2012      08        28        241              0.149917      24.142975       0.559795       0.228267       0.192000       0.006800       0.189500   -9999.000000
53973     53973     shanxi         112.9914       35.7622           97       172     2012      08        29        242              0.147208      24.691406       0.000000       0.221788       0.207000       0.156100       0.170100       0.655000
53973     53973     shanxi         112.9914       35.7622           97       172     2012      08        30        243              0.141542      26.033508       0.000000       0.210890       0.212000   -9999.000000       0.226300   -9999.000000
53973     53973     shanxi         112.9914       35.7622           97       172     2012      08        31        244              0.133083      26.036957       2.248318       0.203382       0.262000       0.031700       0.201100       0.711000
53973     53973     shanxi         112.9914       35.7622           97       172     2012      09        01        245              0.174833      22.867889      16.546591       0.217887       0.203000   -9999.000000       0.252500   -9999.000000
53973     53973     shanxi         112.9914       35.7622           97       172     2012      09        02        246              0.206500      21.745117       0.017110       0.299613       0.202000       0.252000   -9999.000000   -9999.000000
53973     53973     shanxi         112.9914       35.7622           97       172     2012      09        03        247              0.194583      20.050629       0.000000       0.294249       0.180000       0.185200       0.125100       0.786000
53973     53973     shanxi         112.9914       35.7622           97       172     2012      09        04        248              0.184625      20.772095       0.394574       0.271326   -9999.000000   -9999.000000       0.192000   -9999.000000
53973     53973     shanxi         112.9914       35.7622           97       172     2012      09        05        249              0.179250      20.717804       0.097239       0.262365       0.186000       0.159600       0.155300       0.724000
53973     53973     shanxi         112.9914       35.7622           97       172     2012      09        06        250              0.179417      21.702301       3.767064       0.258740       0.188500   -9999.000000       0.191700   -9999.000000
53973     53973     shanxi         112.9914       35.7622           97       172     2012      09        07        251              0.184917      20.056213       0.086481       0.272612       0.207000       0.139800   -9999.000000       0.718000
53973     53973     shanxi         112.9914       35.7622           97       172     2012      09        08        252              0.174833      22.132507       0.095632       0.266562       0.178000       0.063900       0.192100       0.761000
53973     53973     shanxi         112.9914       35.7622           97       172     2012      09        09        253              0.171833      21.401367       0.000000       0.255783       0.183000   -9999.000000       0.106500       0.803000
53973     53973     shanxi         112.9914       35.7622           97       172     2012      09        10        254              0.186375      21.747986      10.330270       0.244654       0.261000       0.009600       0.185100       1.000000
53973     53973     shanxi         112.9914       35.7622           97       172     2012      09        11        255              0.216792      19.539215       3.040390       0.279624       0.182000       0.164300       0.152600   -9999.000000
53973     53973     shanxi         112.9914       35.7622           97       172     2012      09        12        256              0.198833      20.153015       0.000000       0.302140       0.164000       0.150200       0.167600       0.794000
53973     53973     shanxi         112.9914       35.7622           97       172     2012      09        13        257              0.192333      15.818298       0.000000       0.281863       0.166500       0.124800   -9999.000000       0.761000
53973     53973     shanxi         112.9914       35.7622           97       172     2012      09        14        258              0.188458      16.626617       0.000000       0.268191       0.162000   -9999.000000       0.128600       0.766000
53973     53973     shanxi         112.9914       35.7622           97       172     2012      09        15        259              0.181750      17.729034       0.130566       0.259444       0.181000       0.327000       0.130300       0.686000
53973     53973     shanxi         112.9914       35.7622           97       172     2012      09        16        260              0.175625      17.858917       0.000000       0.252522       0.167000   -9999.000000       0.166200   -9999.000000
53973     53973     shanxi         112.9914       35.7622           97       172     2012      09        17        261              0.171458      17.919495       0.071236       0.245345       0.143500       0.217400       0.150700       0.601000
53973     53973     shanxi         112.9914       35.7622           97       172     2012      09        18        262              0.168208      18.387299       0.585444       0.240382       0.175500       0.128800       0.154600       0.805000
53973     53973     shanxi         112.9914       35.7622           97       172     2012      09        19        263              0.162292      18.377563       0.592450       0.239956   -9999.000000   -9999.000000   -9999.000000       0.783000
53973     53973     shanxi         112.9914       35.7622           97       172     2012      09        20        264              0.158208      17.613647       0.067690       0.241211       0.171000   -9999.000000       0.085400       0.686000
53973     53973     shanxi         112.9914       35.7622           97       172     2012      09        21        265              0.155625      18.677368       0.305428       0.235217   -9999.000000       0.336100       0.158300   -9999.000000
53973     53973     shanxi         112.9914       35.7622           97       172     2012      09        22        266              0.163792      16.522461       0.000000       0.240766       0.168000       0.195300       0.123200       0.625000
53973     53973     shanxi         112.9914       35.7622           97       172     2012      09        23        267              0.157958      19.210175       0.000000       0.233804       0.165500   -9999.000000       0.154300       0.819000
53973     53973     shanxi         112.9914       35.7622           97       172     2012      09        24        268              0.153167      19.298218       0.000000       0.227153       0.157000   -9999.000000   -9999.000000       0.760000
53973     53973     shanxi         112.9914       35.7622           97       172     2012      09        25        269              0.150375      18.703033       3.016525       0.221235       0.172000       0.124200       0.153700       0.870000
53973     53973     shanxi         112.9914       35.7622           97       172     2012      09        26        270              0.159958      17.654327       0.214242       0.246257       0.170000       0.182400       0.095200   -9999.000000
53973     53973     shanxi         112.9914       35.7622           97       172     2012      09        27        271              0.169143      17.510620       0.000000       0.253255       0.167000   -9999.000000       0.138900       0.663000
53973     53973     shanxi         112.9914       35.7622           97       172     2012      09        28        272              0.149667      17.386200       0.270165       0.237922       0.159500   -9999.000000       0.113400   -9999.000000
53973     53973     shanxi         112.9914       35.7622           97       172     2012      09        29        273              0.149708      14.632050       0.000000       0.225393       0.172500   -9999.000000       0.141400       0.601000
53973     53973     shanxi         112.9914       35.7622           97       172     2012      09        30        274              0.144875      15.209930       0.000000       0.217797       0.162000       0.742600   -9999.000000   -9999.000000
53973     53973     shanxi         112.9914       35.7622           97       172     2012      10        01        275              0.140417      15.941498       0.000000       0.210775   -9999.000000   -9999.000000       0.072700   -9999.000000
53973     53973     shanxi         112.9914       35.7622           97       172     2012      10        02        276              0.138625      16.940033       0.000000       0.203964       0.150000   -9999.000000       0.100800       0.583000
53973     53973     shanxi         112.9914       35.7622           97       172     2012      10        03        277              0.138958      18.294373       0.000000       0.198669       0.133500       0.081600       0.075100   -9999.000000
53973     53973     shanxi         112.9914       35.7622           97       172     2012      10        04        278              0.131000      19.350708       3.298454       0.193254       0.166000       0.031300       0.098900       0.617000
53973     53973     shanxi         112.9914       35.7622           97       172     2012      10        05        279              0.139833      18.440521       0.000000       0.210444       0.153000       0.121700       0.109400   -9999.000000
53973     53973     shanxi         112.9914       35.7622           97       172     2012      10        06        280              0.137042      16.532104       0.000000       0.227555       0.147000       0.191000   -9999.000000       0.617000
53973     53973     shanxi         112.9914       35.7622           97       172     2012      10        07        281              0.130875      17.035431       0.000000       0.215219       0.152000   -9999.000000       0.036500       0.620000
53973     53973     shanxi         112.9914       35.7622           97       172     2012      10        08        282              0.127542      15.894653       0.040807       0.210498       0.145000   -9999.000000       0.088400       0.730000
53973     53973     shanxi         112.9914       35.7622           97       172     2012      10        09        283              0.127750      16.962982       0.000000       0.207256       0.139000   -9999.000000       0.066100       0.526000
53973     53973     shanxi         112.9914       35.7622           97       172     2012      10        10        284              0.123583      15.615082       0.000000       0.198728       0.148000       0.177000       0.086000   -9999.000000
53973     53973     shanxi         112.9914       35.7622           97       172     2012      10        11        285              0.121292      15.015747       0.000000       0.191949       0.118000       0.047000   -9999.000000       0.605000
53973     53973     shanxi         112.9914       35.7622           97       172     2012      10        12        286              0.120208      16.009827       0.000000       0.188735   -9999.000000   -9999.000000       0.085500       0.592000
53973     53973     shanxi         112.9914       35.7622           97       172     2012      10        13        287              0.119417      16.746613       0.000000       0.187312       0.123000       0.140400       0.055900       0.684000
53973     53973     shanxi         112.9914       35.7622           97       172     2012      10        14        288              0.118042      17.064209       0.382150       0.184139       0.118500       0.337900       0.093200       0.569000
53973     53973     shanxi         112.9914       35.7622           97       172     2012      10        15        289              0.114542      16.457306       0.922544       0.182530       0.146500   -9999.000000       0.062800   -9999.000000
53973     53973     shanxi         112.9914       35.7622           97       172     2012      10        16        290              0.110458      14.806030       0.223748       0.190318       0.127000       0.239200       0.078800       0.669000
53973     53973     shanxi         112.9914       35.7622           97       172     2012      10        17        291              0.108542      11.429321       0.000000       0.199467       0.123000   -9999.000000   -9999.000000       0.528000
53973     53973     shanxi         112.9914       35.7622           97       172     2012      10        18        292              0.095708      10.855652       0.144386       0.190829       0.124000       0.035300       0.045000       0.603000
53973     53973     shanxi         112.9914       35.7622           97       172     2012      10        19        293              0.097000      14.622772       0.000000       0.187701       0.125000       0.175000       0.079500       0.403000
53973     53973     shanxi         112.9914       35.7622           97       172     2012      10        20        294              0.098167      14.051056       0.000000       0.187054       0.129500   -9999.000000       0.065400   -9999.000000
53973     53973     shanxi         112.9914       35.7622           97       172     2012      10        21        295              0.101708      15.710114       1.677779       0.183934       0.137000   -9999.000000       0.083000       0.829000
53973     53973     shanxi         112.9914       35.7622           97       172     2012      10        22        296              0.112875      10.925018       0.000000       0.202814   -9999.000000   -9999.000000   -9999.000000       0.589000
53973     53973     shanxi         112.9914       35.7622           97       172     2012      10        23        297              0.103125       9.864441       0.154994       0.204899   -9999.000000       0.127000   -9999.000000       0.644000
53973     53973     shanxi         112.9914       35.7622           97       172     2012      10        24        298              0.105583       9.702209       0.000000       0.200859   -9999.000000       0.044100       0.021500       0.370000
53973     53973     shanxi         112.9914       35.7622           97       172     2012      10        25        299              0.000000      11.959198       0.730916       0.196130       0.120000   -9999.000000       0.072100   -9999.000000
53973     53973     shanxi         112.9914       35.7622           97       172     2012      10        26        300              0.100583      12.535004       0.067327       0.191334       0.133500       0.165100       0.053600       0.380000
53973     53973     shanxi         112.9914       35.7622           97       172     2012      10        27        301              0.102500      10.144135       0.000000       0.193045       0.123000       0.171800       0.071800   -9999.000000
53973     53973     shanxi         112.9914       35.7622           97       172     2012      10        28        302              0.000000      12.849487       0.652354       0.189908   -9999.000000       0.478800   -9999.000000       0.708000
53973     53973     shanxi         112.9914       35.7622           97       172     2012      10        29        303              0.100333      13.224091       0.000000       0.191955       0.126000       0.192100       0.049400   -9999.000000
53973     53973     shanxi         112.9914       35.7622           97       172     2012      10        30        304              0.096458      11.645020       0.000000       0.196696       0.111000   -9999.000000       0.044100   -9999.000000
53973     53973     shanxi         112.9914       35.7622           97       172     2012      10        31        305              0.095208       9.062225       0.025676       0.191084       0.134000       0.216000       0.064100       0.370000
53973     53973     shanxi         112.9914       35.7622           97       172     2012      11        01        306              0.094292       9.079071       0.000000       0.186566       0.113000       0.101500       0.047600   -9999.000000
53973     53973     shanxi         112.9914       35.7622           97       172     2012      11        02        307              0.094917       9.235199       0.368131       0.184342       0.119000   -9999.000000       0.061400       0.476000
53973     53973     shanxi         112.9914       35.7622           97       172     2012      11        03        308              0.107625      11.009979       0.042369       0.184211   -9999.000000       0.325000   -9999.000000   -9999.000000
53973     53973     shanxi         112.9914       35.7622           97       172     2012      11        04        309              0.099583       3.897675       0.000000       0.188242   -9999.000000       0.174200       0.030500       0.426000
53973     53973     shanxi         112.9914       35.7622           97       172     2012      11        05        310              0.099042       2.205902       0.000000       0.184579       0.128000   -9999.000000       0.063100       0.401000
53973     53973     shanxi         112.9914       35.7622           97       172     2012      11        06        311              0.103458       4.515839       0.000000       0.186279       0.133000       0.209700       0.046400       0.502000
53973     53973     shanxi         112.9914       35.7622           97       172     2012      11        07        312              0.103667       7.057678       0.000000       0.186848       0.124000   -9999.000000       0.064400       0.448000
53973     53973     shanxi         112.9914       35.7622           97       172     2012      11        08        313              0.104750       6.363068       0.000000       0.187028   -9999.000000       0.111900   -9999.000000   -9999.000000
53973     53973     shanxi         112.9914       35.7622           97       172     2012      11        09        314              0.103292       7.511444       0.154608       0.186453       0.145000       0.187600       0.072400       0.328000
53973     53973     shanxi         112.9914       35.7622           97       172     2012      11        10        315              0.097958       5.957886       0.210663       0.188297   -9999.000000       0.157100       0.030800       0.400000
53973     53973     shanxi         112.9914       35.7622           97       172     2012      11        11        316              0.092917       2.855682       0.000000       0.190293       0.130000   -9999.000000       0.065000       0.588000
53973     53973     shanxi         112.9914       35.7622           97       172     2012      11        12        317              0.094083       2.569916       0.000000       0.185800       0.117000   -9999.000000       0.044000       0.349000
53973     53973     shanxi         112.9914       35.7622           97       172     2012      11        13        318              0.000000       3.534485       0.000000       0.186972       0.113000   -9999.000000       0.058700   -9999.000000
53973     53973     shanxi         112.9914       35.7622           97       172     2012      11        14        319              0.098958       4.262512       0.000000       0.184843   -9999.000000       0.126400   -9999.000000       0.321000
53973     53973     shanxi         112.9914       35.7622           97       172     2012      11        15        320              0.099292       4.069153       0.088376       0.186070   -9999.000000   -9999.000000       0.044000       0.650000
53973     53973     shanxi         112.9914       35.7622           97       172     2012      11        16        321              0.096042       2.711365       0.000000       0.188029       0.132000       0.067200       0.043600       0.685000
53973     53973     shanxi         112.9914       35.7622           97       172     2012      11        17        322              0.000000       2.404633       0.000000       0.185465       0.119000   -9999.000000       0.056600       0.350000
53973     53973     shanxi         112.9914       35.7622           97       172     2012      11        18        323              0.102917       4.553925       0.000000       0.187960       0.116000       0.168500       0.058700   -9999.000000
53973     53973     shanxi         112.9914       35.7622           97       172     2012      11        19        324              0.105375       6.116455       0.000000       0.187949   -9999.000000       0.254000       0.057800       0.300000
53973     53973     shanxi         112.9914       35.7622           97       172     2012      11        20        325              0.107167       4.559235       0.000000       0.187402       0.119000       0.034200   -9999.000000       0.395000
53973     53973     shanxi         112.9914       35.7622           97       172     2012      11        21        326              0.107708       4.129578       0.000000       0.189351       0.091000       0.222400       0.022900       0.419000
53973     53973     shanxi         112.9914       35.7622           97       172     2012      11        22        327              0.105958       4.947021       0.000000       0.190274       0.106000   -9999.000000       0.058400       0.278000
53973     53973     shanxi         112.9914       35.7622           97       172     2012      11        23        328              0.098667       4.347992       0.000000       0.189170       0.100000       0.123200       0.035800   -9999.000000
53973     53973     shanxi         112.9914       35.7622           97       172     2012      11        24        329              0.090458       1.345856       0.000000       0.180750   -9999.000000       0.168300       0.054500       0.286000
53973     53973     shanxi         112.9914       35.7622           97       172     2012      11        25        330              0.092375       2.719452       0.287979       0.186568   -9999.000000   -9999.000000   -9999.000000   -9999.000000
53973     53973     shanxi         112.9914       35.7622           97       172     2012      11        26        331              0.084833       1.750916       0.000000       0.186978       0.090000       0.119900   -9999.000000       0.233000
53973     53973     shanxi         112.9914       35.7622           97       172     2012      11        27        332              0.084333       0.582794       0.000000       0.179486       0.108000       0.081500       0.017800   -9999.000000
53973     53973     shanxi         112.9914       35.7622           97       172     2012      11        28        333              0.086250       2.691833       0.000000       0.184235       0.098000       0.125400       0.050500   -9999.000000
53973     53973     shanxi         112.9914       35.7622           97       172     2012      11        29        334              0.079958       0.618073       0.000000       0.178658       0.101000       0.051800       0.038400       0.281000
53973     53973     shanxi         112.9914       35.7622           97       172     2012      11        30        335              0.093000      -0.003693       0.000000       0.175675   -9999.000000   -9999.000000       0.051700   -9999.000000
53973     53973     shanxi         112.9914       35.7622           97       172     2012      12        01        336              0.085583       0.861542       0.070613       0.178476   -9999.000000       0.112200   -9999.000000       0.288000
53973     53973     shanxi         112.9914       35.7622           97       172     2012      12        02        337              0.093250      -1.940369       0.000000       0.172276       0.102000       0.160600       0.024200   -9999.000000
53973     53973     shanxi         112.9914       35.7622           97       172     2012      12        03        338              0.084250       0.432861       0.000000       0.182172       0.101000   -9999.000000       0.051200       0.118000
53973     53973     shanxi         112.9914       35.7622           97       172     2012      12        04        339              0.075542      -1.085358       0.000000       0.174594       0.104000       0.071700       0.031300       0.322000
53973     53973     shanxi         112.9914       35.7622           97       172     2012      12        05        340              0.077500       0.945892       0.000000       0.180576   -9999.000000   -9999.000000       0.047200       0.286000
53973     53973     shanxi         112.9914       35.7622           97       172     2012      12        06        341              0.074708      -1.870117       0.000000       0.170973   -9999.000000   -9999.000000   -9999.000000       0.310000
53973     53973     shanxi         112.9914       35.7622           97       172     2012      12        07        342              0.079458       0.495453       0.000000       0.177896       0.076000       0.095800   -9999.000000   -9999.000000
53973     53973     shanxi         112.9914       35.7622           97       172     2012      12        08        343              0.042917      -1.200928       0.000000       0.172321       0.100000   -9999.000000       0.010000       0.057000
53973     53973     shanxi         112.9914       35.7622           97       172     2012      12        09        344              0.040958      -2.799805       0.000000       0.166058       0.101000       0.160900       0.049200       0.193000
53973     53973     shanxi         112.9914       35.7622           97       172     2012      12        10        345              0.028667      -1.985931       0.000000       0.167518       0.103000   -9999.000000       0.030200       0.274000
53973     53973     shanxi         112.9914       35.7622           97       172     2012      12        11        346              0.021250      -2.388062       0.000000       0.167162   -9999.000000       0.128900       0.043600       0.199000
53973     53973     shanxi         112.9914       35.7622           97       172     2012      12        12        347              0.024333      -3.718140       0.000000       0.162901   -9999.000000   -9999.000000   -9999.000000   -9999.000000
53973     53973     shanxi         112.9914       35.7622           97       172     2012      12        13        348              0.030958      -2.291016       0.291996       0.167241   -9999.000000   -9999.000000       0.033300       0.150000
53973     53973     shanxi         112.9914       35.7622           97       172     2012      12        14        349              0.034083      -2.243591       0.000000       0.170490   -9999.000000       0.094100       0.022900       0.221000
53973     53973     shanxi         112.9914       35.7622           97       172     2012      12        15        350              0.000000      -1.666199       0.000000       0.174233   -9999.000000       0.060800       0.041500       0.189000
53973     53973     shanxi         112.9914       35.7622           97       172     2012      12        16        351              0.042500      -2.427612       0.033757       0.167948   -9999.000000       0.152900   -9999.000000       0.450000
53973     53973     shanxi         112.9914       35.7622           97       172     2012      12        17        352              0.044750      -1.216614       0.000000       0.178157   -9999.000000       0.056400       0.043900   -9999.000000
53973     53973     shanxi         112.9914       35.7622           97       172     2012      12        18        353              0.041583      -0.709564       0.194332       0.181366   -9999.000000   -9999.000000   -9999.000000       0.178000
53973     53973     shanxi         112.9914       35.7622           97       172     2012      12        19        354              0.037708      -1.921661       0.000000       0.174615   -9999.000000   -9999.000000       0.011700       0.203000
53973     53973     shanxi         112.9914       35.7622           97       172     2012      12        20        355              0.000000      -2.692169       0.317864       0.168074   -9999.000000   -9999.000000       0.040500       0.138000
53973     53973     shanxi         112.9914       35.7622           97       172     2012      12        21        356              0.035542      -4.212799       0.000000       0.159474   -9999.000000       0.235100       0.022800       0.177000
53973     53973     shanxi         112.9914       35.7622           97       172     2012      12        22        357              0.026833      -3.167725       0.000000       0.166585   -9999.000000       0.046500       0.037400   -9999.000000
53973     53973     shanxi         112.9914       35.7622           97       172     2012      12        23        358              0.016333      -6.073425       0.000000       0.155816   -9999.000000   -9999.000000   -9999.000000       0.062000
53973     53973     shanxi         112.9914       35.7622           97       172     2012      12        24        359              0.017810      -8.348541       0.000000       0.142532   -9999.000000       0.173400       0.042200   -9999.000000
53973     53973     shanxi         112.9914       35.7622           97       172     2012      12        25        360              0.016583      -5.526855       0.000000       0.152649   -9999.000000       0.042500       0.010000       0.124000
53973     53973     shanxi         112.9914       35.7622           97       172     2012      12        26        361              0.000000      -5.498108       0.000000       0.155732   -9999.000000       0.266900       0.043300   -9999.000000
53973     53973     shanxi         112.9914       35.7622           97       172     2012      12        27        362              0.017182      -5.610901       0.000000       0.148631   -9999.000000       0.145100       0.027500   -9999.000000
53973     53973     shanxi         112.9914       35.7622           97       172     2012      12        28        363              0.020000      -4.131317       0.000000       0.154707   -9999.000000       0.118100       0.040900       0.155000
53973     53973     shanxi         112.9914       35.7622           97       172     2012      12        29        364              0.000000      -3.305450       0.000000       0.163088   -9999.000000       0.131300   -9999.000000   -9999.000000
53973     53973     shanxi         112.9914       35.7622           97       172     2012      12        30        365              0.000000      -8.467102       0.000000       0.147431   -9999.000000       0.101700       0.027400       0.122000
53973     53973     shanxi         112.9914       35.7622           97       172     2012      12        31        366              0.011333      -6.903137       0.000000       0.146677   -9999.000000   -9999.000000       0.022400   -9999.000000
