# Supplementary material for: Research on Fusing Multisatellite Soil Moisture Data Based on Bayesian Model Averaging
Source: Hindawi journal article supplement (doi:10.1155/2018/9310838), 2018-06-25
Supplement: f1 [file 9310838.f1.zip › 2012_sm00-10cm_daily_ZDB_ZHY_54026_366days_allin.txt]

54026     54026     neimenggu      120.9000       44.5667           62       204     2012      01        01        001              0.000000   -9999.000000       0.000000   -9999.000000   -9999.000000   -9999.000000       0.075700   -9999.000000
54026     54026     neimenggu      120.9000       44.5667           62       204     2012      01        02        002              0.000000      -8.401184       0.000000       0.087478   -9999.000000   -9999.000000   -9999.000000   -9999.000000
54026     54026     neimenggu      120.9000       44.5667           62       204     2012      01        03        003              0.000000      -7.914612       0.000000       0.087665   -9999.000000   -9999.000000       0.058500       0.118000
54026     54026     neimenggu      120.9000       44.5667           62       204     2012      01        04        004              0.000000      -7.616028       0.000000       0.087806   -9999.000000   -9999.000000       0.067700       0.114000
54026     54026     neimenggu      120.9000       44.5667           62       204     2012      01        05        005              0.000000      -8.597626       0.000000       0.087915   -9999.000000   -9999.000000       0.068300       0.105000
54026     54026     neimenggu      120.9000       44.5667           62       204     2012      01        06        006              0.000000      -9.313721       0.000000       0.088001   -9999.000000   -9999.000000       0.070800       0.169000
54026     54026     neimenggu      120.9000       44.5667           62       204     2012      01        07        007              0.000000     -10.211639       0.000000       0.088031   -9999.000000   -9999.000000       0.075600   -9999.000000
54026     54026     neimenggu      120.9000       44.5667           62       204     2012      01        08        008              0.000000     -10.618683       0.000000       0.087948   -9999.000000   -9999.000000       0.066000       0.156000
54026     54026     neimenggu      120.9000       44.5667           62       204     2012      01        09        009              0.000000     -10.576324       0.000000       0.087929   -9999.000000   -9999.000000       0.064400       0.125000
54026     54026     neimenggu      120.9000       44.5667           62       204     2012      01        10        010              0.000000     -11.077789       0.000000       0.087826   -9999.000000   -9999.000000   -9999.000000       0.083000
54026     54026     neimenggu      120.9000       44.5667           62       204     2012      01        11        011              0.000000     -12.282135       0.000000       0.087500   -9999.000000   -9999.000000       0.064500       0.041000
54026     54026     neimenggu      120.9000       44.5667           62       204     2012      01        12        012              0.000000     -12.914307       0.000000       0.086948   -9999.000000   -9999.000000       0.068400       0.145000
54026     54026     neimenggu      120.9000       44.5667           62       204     2012      01        13        013              0.000000     -10.070160       0.000000       0.087191   -9999.000000   -9999.000000   -9999.000000       0.158000
54026     54026     neimenggu      120.9000       44.5667           62       204     2012      01        14        014              0.000000      -9.621063       0.000000       0.087238   -9999.000000   -9999.000000       0.059900       0.143000
54026     54026     neimenggu      120.9000       44.5667           62       204     2012      01        15        015              0.000000     -10.406433       0.000000       0.086629   -9999.000000   -9999.000000       0.064700   -9999.000000
54026     54026     neimenggu      120.9000       44.5667           62       204     2012      01        16        016              0.000000      -9.146698       0.000000       0.086490   -9999.000000   -9999.000000       0.080700       0.108000
54026     54026     neimenggu      120.9000       44.5667           62       204     2012      01        17        017              0.000000     -11.275391       0.000000       0.085951   -9999.000000   -9999.000000       0.073600       0.144000
54026     54026     neimenggu      120.9000       44.5667           62       204     2012      01        18        018              0.000000     -12.528503       0.000000       0.085103   -9999.000000   -9999.000000       0.078400       0.150000
54026     54026     neimenggu      120.9000       44.5667           62       204     2012      01        19        019              0.000000     -11.170532       0.000000       0.085394   -9999.000000   -9999.000000   -9999.000000       0.115000
54026     54026     neimenggu      120.9000       44.5667           62       204     2012      01        20        020              0.000000     -11.836884       0.000000       0.085218   -9999.000000   -9999.000000       0.070200       0.057000
54026     54026     neimenggu      120.9000       44.5667           62       204     2012      01        21        021              0.000000     -15.662964       0.000000       0.084067   -9999.000000   -9999.000000       0.078300       0.106000
54026     54026     neimenggu      120.9000       44.5667           62       204     2012      01        22        022              0.000000     -16.948975       0.000000       0.083518   -9999.000000   -9999.000000       0.076200       0.125000
54026     54026     neimenggu      120.9000       44.5667           62       204     2012      01        23        023              0.000000     -16.307343       0.000000       0.083453   -9999.000000   -9999.000000       0.081000   -9999.000000
54026     54026     neimenggu      120.9000       44.5667           62       204     2012      01        24        024              0.000000     -15.298279       0.000000       0.083571   -9999.000000   -9999.000000       0.089200       0.154000
54026     54026     neimenggu      120.9000       44.5667           62       204     2012      01        25        025              0.000000     -16.259430       0.000000       0.083357   -9999.000000   -9999.000000       0.074300       0.106000
54026     54026     neimenggu      120.9000       44.5667           62       204     2012      01        26        026              0.000000     -14.174713       0.000000       0.083537   -9999.000000   -9999.000000       0.075400       0.103000
54026     54026     neimenggu      120.9000       44.5667           62       204     2012      01        27        027              0.000000     -13.725098       0.000000       0.083595   -9999.000000   -9999.000000       0.080200       0.152000
54026     54026     neimenggu      120.9000       44.5667           62       204     2012      01        28        028              0.000000     -14.609253       0.000000       0.083307   -9999.000000   -9999.000000       0.078700   -9999.000000
54026     54026     neimenggu      120.9000       44.5667           62       204     2012      01        29        029              0.000000     -13.368042       0.000000       0.083238   -9999.000000   -9999.000000       0.084800       0.094000
54026     54026     neimenggu      120.9000       44.5667           62       204     2012      01        30        030              0.000000     -16.022583       0.000000       0.082682   -9999.000000   -9999.000000   -9999.000000       0.128000
54026     54026     neimenggu      120.9000       44.5667           62       204     2012      01        31        031              0.000000     -16.687469       0.000000       0.082453   -9999.000000   -9999.000000       0.073400   -9999.000000
54026     54026     neimenggu      120.9000       44.5667           62       204     2012      02        01        032              0.000000     -17.284988       0.000000       0.082414   -9999.000000   -9999.000000   -9999.000000       0.164000
54026     54026     neimenggu      120.9000       44.5667           62       204     2012      02        02        033              0.000000     -17.117126       0.000000       0.082600   -9999.000000   -9999.000000       0.087500   -9999.000000
54026     54026     neimenggu      120.9000       44.5667           62       204     2012      02        03        034              0.000000     -13.468842       0.000000       0.083145   -9999.000000   -9999.000000       0.082200       0.103000
54026     54026     neimenggu      120.9000       44.5667           62       204     2012      02        04        035              0.000000     -12.530365       0.000000       0.083488   -9999.000000   -9999.000000       0.089200       0.061000
54026     54026     neimenggu      120.9000       44.5667           62       204     2012      02        05        036              0.000000      -9.572998       0.000000       0.083991   -9999.000000   -9999.000000   -9999.000000   -9999.000000
54026     54026     neimenggu      120.9000       44.5667           62       204     2012      02        06        037              0.000000      -7.493958       0.000000       0.088633   -9999.000000   -9999.000000       0.076900       0.135000
54026     54026     neimenggu      120.9000       44.5667           62       204     2012      02        07        038              0.000000     -12.987061       0.000000       0.084425   -9999.000000   -9999.000000       0.084600       0.097000
54026     54026     neimenggu      120.9000       44.5667           62       204     2012      02        08        039              0.000000     -12.684906       0.000000       0.083744   -9999.000000   -9999.000000       0.081600       0.086000
54026     54026     neimenggu      120.9000       44.5667           62       204     2012      02        09        040              0.000000     -11.213165       0.000000       0.083997   -9999.000000   -9999.000000       0.084600       0.122000
54026     54026     neimenggu      120.9000       44.5667           62       204     2012      02        10        041              0.000000     -10.427460       0.000000       0.083809   -9999.000000   -9999.000000       0.087000       0.113000
54026     54026     neimenggu      120.9000       44.5667           62       204     2012      02        11        042              0.000000     -10.425385       0.000000       0.083479   -9999.000000   -9999.000000       0.076000       0.069000
54026     54026     neimenggu      120.9000       44.5667           62       204     2012      02        12        043              0.000000     -10.835114       0.000000       0.083106   -9999.000000   -9999.000000       0.079200       0.099000
54026     54026     neimenggu      120.9000       44.5667           62       204     2012      02        13        044              0.000000      -7.824097       0.000000       0.084421   -9999.000000   -9999.000000       0.085200   -9999.000000
54026     54026     neimenggu      120.9000       44.5667           62       204     2012      02        14        045              0.000000      -6.883392       0.000000       0.087811   -9999.000000   -9999.000000       0.081800       0.042000
54026     54026     neimenggu      120.9000       44.5667           62       204     2012      02        15        046              0.000000      -9.985992       0.000000       0.083182   -9999.000000   -9999.000000       0.090600       0.070000
54026     54026     neimenggu      120.9000       44.5667           62       204     2012      02        16        047              0.000000      -8.966125       0.000000       0.083061   -9999.000000   -9999.000000   -9999.000000       0.098000
54026     54026     neimenggu      120.9000       44.5667           62       204     2012      02        17        048              0.000000     -10.382812       0.000000       0.082279   -9999.000000   -9999.000000       0.075900       0.086000
54026     54026     neimenggu      120.9000       44.5667           62       204     2012      02        18        049              0.000000     -10.221497       0.000000       0.082271   -9999.000000   -9999.000000   -9999.000000       0.045000
54026     54026     neimenggu      120.9000       44.5667           62       204     2012      02        19        050              0.000000      -7.252808       0.000000       0.085678       0.132000   -9999.000000       0.081200       0.064000
54026     54026     neimenggu      120.9000       44.5667           62       204     2012      02        20        051              0.000000      -4.375397       0.000000       0.115054   -9999.000000   -9999.000000       0.079100       0.082000
54026     54026     neimenggu      120.9000       44.5667           62       204     2012      02        21        052              0.000000      -8.702301       0.000000       0.092195   -9999.000000   -9999.000000       0.084400       0.105000
54026     54026     neimenggu      120.9000       44.5667           62       204     2012      02        22        053              0.000000      -7.393799       0.000000       0.091242   -9999.000000   -9999.000000   -9999.000000       0.119000
54026     54026     neimenggu      120.9000       44.5667           62       204     2012      02        23        054              0.000000      -6.989349       0.091061       0.092225   -9999.000000   -9999.000000       0.074800       0.079000
54026     54026     neimenggu      120.9000       44.5667           62       204     2012      02        24        055              0.000000      -3.905579       0.000000       0.115823   -9999.000000   -9999.000000       0.080500       0.011000
54026     54026     neimenggu      120.9000       44.5667           62       204     2012      02        25        056              0.000000      -4.902893       0.000000       0.119601   -9999.000000   -9999.000000       0.078300       0.111000
54026     54026     neimenggu      120.9000       44.5667           62       204     2012      02        26        057              0.000000      -6.157257       0.000000       0.104724       0.118000   -9999.000000       0.082300   -9999.000000
54026     54026     neimenggu      120.9000       44.5667           62       204     2012      02        27        058              0.000000      -6.246887       0.000000       0.104495       0.106000   -9999.000000       0.090800       0.100000
54026     54026     neimenggu      120.9000       44.5667           62       204     2012      02        28        059              0.000000      -2.342896       0.156926       0.140414       0.111000       0.093000       0.076100       0.139000
54026     54026     neimenggu      120.9000       44.5667           62       204     2012      02        29        060              0.000000   -9999.000000       0.000000   -9999.000000   -9999.000000   -9999.000000   -9999.000000   -9999.000000
54026     54026     neimenggu      120.9000       44.5667           62       204     2012      03        01        061              0.000000       0.436371       0.785163       0.164817       0.121000       0.007600       0.082200       0.155000
54026     54026     neimenggu      120.9000       44.5667           62       204     2012      03        02        062              0.000000      -4.131714       0.000000       0.129987       0.120000   -9999.000000       0.079300   -9999.000000
54026     54026     neimenggu      120.9000       44.5667           62       204     2012      03        03        063              0.000000      -4.849518       0.237527       0.117771       0.112000   -9999.000000       0.087300       0.093000
54026     54026     neimenggu      120.9000       44.5667           62       204     2012      03        04        064              0.000000      -1.657806       1.038877       0.142789       0.105000   -9999.000000   -9999.000000       0.103000
54026     54026     neimenggu      120.9000       44.5667           62       204     2012      03        05        065              0.000000      -0.750854       1.290839       0.151629   -9999.000000       0.072000       0.063500   -9999.000000
54026     54026     neimenggu      120.9000       44.5667           62       204     2012      03        06        066              0.000000      -2.210083       0.000000       0.126146   -9999.000000   -9999.000000       0.070500       0.021000
54026     54026     neimenggu      120.9000       44.5667           62       204     2012      03        07        067              0.000000      -3.210571       0.000000       0.132485   -9999.000000   -9999.000000       0.066200       0.001000
54026     54026     neimenggu      120.9000       44.5667           62       204     2012      03        08        068              0.000000      -3.986084       0.000000       0.120953   -9999.000000       0.039700       0.067400       0.158000
54026     54026     neimenggu      120.9000       44.5667           62       204     2012      03        09        069              0.000000      -6.110809       0.000000       0.105925   -9999.000000       0.185500       0.067400       0.114000
54026     54026     neimenggu      120.9000       44.5667           62       204     2012      03        10        070              0.000000      -4.382965       0.000000       0.113100   -9999.000000       0.018000       0.059300       0.168000
54026     54026     neimenggu      120.9000       44.5667           62       204     2012      03        11        071              0.000000      -6.366547       0.000000       0.102480   -9999.000000   -9999.000000       0.062900       0.108000
54026     54026     neimenggu      120.9000       44.5667           62       204     2012      03        12        072              0.000000      -4.520050       0.000000       0.114459       0.116000   -9999.000000       0.089600       0.065000
54026     54026     neimenggu      120.9000       44.5667           62       204     2012      03        13        073              0.000000      -2.668335       0.000000       0.134112       0.118000   -9999.000000       0.077600   -9999.000000
54026     54026     neimenggu      120.9000       44.5667           62       204     2012      03        14        074              0.000000      -0.403687       0.582106       0.159220       0.122000   -9999.000000       0.086500       0.137000
54026     54026     neimenggu      120.9000       44.5667           62       204     2012      03        15        075              0.000000       0.090057       1.047501       0.165793       0.149000   -9999.000000       0.118800       0.309000
54026     54026     neimenggu      120.9000       44.5667           62       204     2012      03        16        076              0.000000       2.897949       0.000000       0.223648   -9999.000000       0.106300       0.089300       0.181000
54026     54026     neimenggu      120.9000       44.5667           62       204     2012      03        17        077              0.000000       4.932159       0.000000       0.218134   -9999.000000   -9999.000000       0.080100       0.014000
54026     54026     neimenggu      120.9000       44.5667           62       204     2012      03        18        078              0.000000      -4.031860       0.000000       0.117734       0.121000   -9999.000000       0.088900       0.036000
54026     54026     neimenggu      120.9000       44.5667           62       204     2012      03        19        079              0.000000      -1.030487       0.000000       0.150471       0.109000       0.253400       0.076200       0.079000
54026     54026     neimenggu      120.9000       44.5667           62       204     2012      03        20        080              0.000000       0.182709       0.649843       0.165721       0.102000   -9999.000000       0.083900       0.137000
54026     54026     neimenggu      120.9000       44.5667           62       204     2012      03        21        081              0.000000       2.282104       0.675084       0.189520   -9999.000000       0.022200   -9999.000000       0.153000
54026     54026     neimenggu      120.9000       44.5667           62       204     2012      03        22        082              0.000000       3.898438       0.405949       0.214024       0.119000       0.092700       0.077300       0.123000
54026     54026     neimenggu      120.9000       44.5667           62       204     2012      03        23        083              0.000000       4.466522       0.512120       0.217966   -9999.000000       0.043300       0.105300       0.138000
54026     54026     neimenggu      120.9000       44.5667           62       204     2012      03        24        084              0.000000       2.298370       3.918596       0.198202       0.105000       0.089800       0.081800       0.086000
54026     54026     neimenggu      120.9000       44.5667           62       204     2012      03        25        085              0.000000       2.666138       0.141122       0.196231       0.103000       0.097400       0.080800       0.085000
54026     54026     neimenggu      120.9000       44.5667           62       204     2012      03        26        086              0.000000       2.844330       0.468983       0.206801   -9999.000000       0.008100       0.085400   -9999.000000
54026     54026     neimenggu      120.9000       44.5667           62       204     2012      03        27        087              0.000000       7.719147       0.103506       0.237732       0.114000       0.053300       0.076000       0.130000
54026     54026     neimenggu      120.9000       44.5667           62       204     2012      03        28        088              0.000000       7.432068       0.000000       0.226697       0.113000       0.019000       0.076900       0.059000
54026     54026     neimenggu      120.9000       44.5667           62       204     2012      03        29        089              0.000000      10.060791       1.336500       0.233648       0.094000       0.126400       0.086400   -9999.000000
54026     54026     neimenggu      120.9000       44.5667           62       204     2012      03        30        090              0.000000       7.414581       0.103659       0.224852       0.113000   -9999.000000       0.077400       0.076000
54026     54026     neimenggu      120.9000       44.5667           62       204     2012      03        31        091              0.000000       4.102936       0.693012       0.196871   -9999.000000       0.015700       0.088100   -9999.000000
54026     54026     neimenggu      120.9000       44.5667           62       204     2012      04        01        092              0.000000       1.465240       0.093926       0.175109   -9999.000000       0.036000       0.087000       0.018000
54026     54026     neimenggu      120.9000       44.5667           62       204     2012      04        02        093              0.000000       1.874176       0.298811       0.178380       0.101000   -9999.000000       0.081300       0.094000
54026     54026     neimenggu      120.9000       44.5667           62       204     2012      04        03        094              0.000000       3.732483       0.085271       0.198760       0.096000       0.001900       0.084900   -9999.000000
54026     54026     neimenggu      120.9000       44.5667           62       204     2012      04        04        095              0.000000       5.368011       0.082511       0.224079       0.089000       0.256700       0.091600       0.134000
54026     54026     neimenggu      120.9000       44.5667           62       204     2012      04        05        096              0.000000       5.391602       0.048249       0.218460       0.097000       0.013100       0.085300       0.071000
54026     54026     neimenggu      120.9000       44.5667           62       204     2012      04        06        097              0.000000       3.576050       0.000000       0.192901   -9999.000000       0.232300       0.091600       0.014000
54026     54026     neimenggu      120.9000       44.5667           62       204     2012      04        07        098              0.000000       4.180695       0.340223       0.201512       0.116000   -9999.000000   -9999.000000       0.095000
54026     54026     neimenggu      120.9000       44.5667           62       204     2012      04        08        099              0.000000       9.951172       1.957673       0.226279       0.118000       0.018000       0.088000       0.115000
54026     54026     neimenggu      120.9000       44.5667           62       204     2012      04        09        100              0.000000       7.749817       0.000000       0.234139       0.109000       0.060500       0.090200       0.172000
54026     54026     neimenggu      120.9000       44.5667           62       204     2012      04        10        101              0.000000      12.289764       0.300917       0.229690       0.101000       0.026400       0.083300       0.140000
54026     54026     neimenggu      120.9000       44.5667           62       204     2012      04        11        102              0.000000       8.828796       0.662674       0.222752       0.100000   -9999.000000       0.086600   -9999.000000
54026     54026     neimenggu      120.9000       44.5667           62       204     2012      04        12        103              0.000000      11.086395       0.000000       0.221815       0.105500   -9999.000000       0.096100       0.091000
54026     54026     neimenggu      120.9000       44.5667           62       204     2012      04        13        104              0.000000      11.195618       0.000000       0.218925       0.114000   -9999.000000       0.084400       0.099000
54026     54026     neimenggu      120.9000       44.5667           62       204     2012      04        14        105              0.000000      14.820221       0.000000       0.211549       0.093000       0.053300       0.085300       0.202000
54026     54026     neimenggu      120.9000       44.5667           62       204     2012      04        15        106              0.000000      12.762909       0.000000       0.208084       0.094000       0.031200       0.085900       0.171000
54026     54026     neimenggu      120.9000       44.5667           62       204     2012      04        16        107              0.000000       9.523590       0.365660       0.206333       0.092000   -9999.000000       0.083600       0.053000
54026     54026     neimenggu      120.9000       44.5667           62       204     2012      04        17        108              0.000000      11.859283       0.000000       0.204759       0.102500   -9999.000000   -9999.000000       0.084000
54026     54026     neimenggu      120.9000       44.5667           62       204     2012      04        18        109              0.000000      16.403717       0.000000       0.200311       0.098000       0.017000       0.093600       0.177000
54026     54026     neimenggu      120.9000       44.5667           62       204     2012      04        19        110              0.000000      19.368134       0.786607       0.194547       0.089000       0.108600       0.098500   -9999.000000
54026     54026     neimenggu      120.9000       44.5667           62       204     2012      04        20        111              0.000000      16.985870       0.000000       0.197234       0.096500   -9999.000000   -9999.000000       0.156000
54026     54026     neimenggu      120.9000       44.5667           62       204     2012      04        21        112              0.000000      16.827789       0.000000       0.194380       0.094000       0.013900       0.089500       0.078000
54026     54026     neimenggu      120.9000       44.5667           62       204     2012      04        22        113              0.000000      17.685577       0.000000       0.192868       0.091000       0.032000       0.082200       0.129000
54026     54026     neimenggu      120.9000       44.5667           62       204     2012      04        23        114              0.000000      19.126740      15.882983       0.187855       0.105000       0.022100       0.143600       0.223000
54026     54026     neimenggu      120.9000       44.5667           62       204     2012      04        24        115              0.000000      19.801758      17.698805       0.260722   -9999.000000       0.204700   -9999.000000   -9999.000000
54026     54026     neimenggu      120.9000       44.5667           62       204     2012      04        25        116              0.000000      12.052002       0.000000       0.313120       0.106000   -9999.000000       0.093500       0.224000
54026     54026     neimenggu      120.9000       44.5667           62       204     2012      04        26        117              0.000000      11.406250       0.060010       0.276440       0.102500       0.090600       0.093100       0.214000
54026     54026     neimenggu      120.9000       44.5667           62       204     2012      04        27        118              0.000000      13.789001       0.482292       0.262301       0.113000       0.172800       0.094900   -9999.000000
54026     54026     neimenggu      120.9000       44.5667           62       204     2012      04        28        119              0.000000      10.894775       0.154419       0.256439       0.106000       0.240000       0.092600       0.184000
54026     54026     neimenggu      120.9000       44.5667           62       204     2012      04        29        120              0.000000       9.762238       0.000000       0.250785       0.102000       0.174800       0.101000       0.209000
54026     54026     neimenggu      120.9000       44.5667           62       204     2012      04        30        121              0.000000      14.199219       0.096875       0.245619       0.098500   -9999.000000       0.090200       0.168000
54026     54026     neimenggu      120.9000       44.5667           62       204     2012      05        01        122              0.000000      15.817413       1.050567       0.240111       0.095000       0.026100       0.086500       0.169000
54026     54026     neimenggu      120.9000       44.5667           62       204     2012      05        02        123              0.000000      16.691956       0.000000       0.236384       0.105000       0.043600       0.091400   -9999.000000
54026     54026     neimenggu      120.9000       44.5667           62       204     2012      05        03        124              0.000000      16.750854       0.659367       0.239765       0.098000       0.099600       0.089800       0.273000
54026     54026     neimenggu      120.9000       44.5667           62       204     2012      05        04        125              0.000000      21.248688       0.000000       0.225740       0.103000   -9999.000000       0.090900       0.257000
54026     54026     neimenggu      120.9000       44.5667           62       204     2012      05        05        126              0.000000      19.021667       0.000000       0.216734       0.082000   -9999.000000   -9999.000000       0.201000
54026     54026     neimenggu      120.9000       44.5667           62       204     2012      05        06        127              0.000000      18.062103       0.000000       0.210655       0.095000       0.056400       0.082400       0.149000
54026     54026     neimenggu      120.9000       44.5667           62       204     2012      05        07        128              0.000000      19.248535       0.000000       0.205093   -9999.000000       0.196100       0.083000       0.279000
54026     54026     neimenggu      120.9000       44.5667           62       204     2012      05        08        129              0.000000      20.402557       0.000000       0.200495       0.092000   -9999.000000       0.092600       0.311000
54026     54026     neimenggu      120.9000       44.5667           62       204     2012      05        09        130              0.000000      19.986786       0.000000       0.198054       0.090000       0.040000       0.084800       0.257000
54026     54026     neimenggu      120.9000       44.5667           62       204     2012      05        10        131              0.000000      20.739441       0.000000       0.193412       0.081000       0.110800       0.089700   -9999.000000
54026     54026     neimenggu      120.9000       44.5667           62       204     2012      05        11        132              0.000000      20.691559       0.292730       0.189007       0.118500       0.056200   -9999.000000       0.242000
54026     54026     neimenggu      120.9000       44.5667           62       204     2012      05        12        133              0.000000      18.265045       9.538034       0.194668   -9999.000000   -9999.000000       0.211700       0.751000
54026     54026     neimenggu      120.9000       44.5667           62       204     2012      05        13        134              0.000000      14.006958       2.268346       0.267541   -9999.000000   -9999.000000       0.184200       0.661000
54026     54026     neimenggu      120.9000       44.5667           62       204     2012      05        14        135              0.000000      13.180359       0.207831       0.261667       0.156000       0.295500       0.144700       0.406000
54026     54026     neimenggu      120.9000       44.5667           62       204     2012      05        15        136              0.000000      13.272522       1.862853       0.248528       0.122000       0.221400       0.121900       0.385000
54026     54026     neimenggu      120.9000       44.5667           62       204     2012      05        16        137              0.000000      14.621185       4.662175       0.249999       0.231000       0.160600       0.199100       0.495000
54026     54026     neimenggu      120.9000       44.5667           62       204     2012      05        17        138              0.000000      12.034332       0.000000       0.271511       0.133500       0.200400       0.114100       0.405000
54026     54026     neimenggu      120.9000       44.5667           62       204     2012      05        18        139              0.000000      19.723633       0.000000       0.247497       0.129000   -9999.000000       0.101100       0.410000
54026     54026     neimenggu      120.9000       44.5667           62       204     2012      05        19        140              0.000000      23.187866       0.000000       0.230507       0.117500       0.156000       0.097700       0.330000
54026     54026     neimenggu      120.9000       44.5667           62       204     2012      05        20        141              0.000000      19.606506       0.000000       0.219800       0.110000       0.266200       0.098400       0.238000
54026     54026     neimenggu      120.9000       44.5667           62       204     2012      05        21        142              0.000000      23.049103       0.293790       0.210977       0.126000       0.087000       0.111700       0.230000
54026     54026     neimenggu      120.9000       44.5667           62       204     2012      05        22        143              0.000000      25.254822       0.577092       0.201736       0.165000       0.065200   -9999.000000       0.310000
54026     54026     neimenggu      120.9000       44.5667           62       204     2012      05        23        144              0.000000      19.343506       0.000000       0.207419   -9999.000000   -9999.000000       0.094400   -9999.000000
54026     54026     neimenggu      120.9000       44.5667           62       204     2012      05        24        145              0.000000      18.763641       0.000000       0.196803       0.138000       0.093800       0.098800       0.279000
54026     54026     neimenggu      120.9000       44.5667           62       204     2012      05        25        146              0.000000      18.123047       0.000000       0.191921       0.122000       0.097300       0.098500       0.216000
54026     54026     neimenggu      120.9000       44.5667           62       204     2012      05        26        147              0.000000      19.749298       0.058329       0.187367       0.114000   -9999.000000       0.102400   -9999.000000
54026     54026     neimenggu      120.9000       44.5667           62       204     2012      05        27        148              0.000000      20.563843       0.000000       0.184487       0.127000   -9999.000000       0.107900       0.325000
54026     54026     neimenggu      120.9000       44.5667           62       204     2012      05        28        149              0.000000      23.070038       0.000000       0.176460       0.131000   -9999.000000       0.094400       0.328000
54026     54026     neimenggu      120.9000       44.5667           62       204     2012      05        29        150              0.000000      23.874908      11.995344       0.170561       0.298000       0.049300       0.100600       0.952000
54026     54026     neimenggu      120.9000       44.5667           62       204     2012      05        30        151              0.000000      20.145325       0.039898       0.229820       0.142500       0.296800       0.107800   -9999.000000
54026     54026     neimenggu      120.9000       44.5667           62       204     2012      05        31        152              0.000000      19.851807       0.000000       0.244667       0.108000   -9999.000000   -9999.000000   -9999.000000
54026     54026     neimenggu      120.9000       44.5667           62       204     2012      06        01        153              0.000000      21.996674      10.627478       0.222181       0.222500       0.159000       0.198700       0.442000
54026     54026     neimenggu      120.9000       44.5667           62       204     2012      06        02        154              0.000000      20.096802       9.157133       0.254068       0.308000       0.367900       0.213200       0.665000
54026     54026     neimenggu      120.9000       44.5667           62       204     2012      06        03        155              0.000000      17.106049       0.068947       0.292809       0.229000       0.211800       0.141600       0.538000
54026     54026     neimenggu      120.9000       44.5667           62       204     2012      06        04        156              0.000000      20.819733       2.979501       0.265179       0.313000       0.151400       0.200100       0.453000
54026     54026     neimenggu      120.9000       44.5667           62       204     2012      06        05        157              0.000000      19.510406       0.000000       0.269083       0.209000   -9999.000000       0.118500       0.491000
54026     54026     neimenggu      120.9000       44.5667           62       204     2012      06        06        158              0.000000      23.589569       1.731775       0.249241       0.239500       0.104000       0.142300       0.677000
54026     54026     neimenggu      120.9000       44.5667           62       204     2012      06        07        159              0.000000      22.738251       0.000000       0.251229       0.178000       0.229500       0.108000       0.440000
54026     54026     neimenggu      120.9000       44.5667           62       204     2012      06        08        160              0.000000      23.701050       0.300162       0.238910       0.177000       0.196100   -9999.000000   -9999.000000
54026     54026     neimenggu      120.9000       44.5667           62       204     2012      06        09        161              0.000000      23.230621       2.621505       0.229901       0.197500       0.305800       0.107700       0.378000
54026     54026     neimenggu      120.9000       44.5667           62       204     2012      06        10        162              0.000000      21.064911       0.000000       0.241705       0.167000   -9999.000000       0.083700       0.373000
54026     54026     neimenggu      120.9000       44.5667           62       204     2012      06        11        163              0.000000      20.880859      11.311847       0.228137       0.141000       0.139500       0.161000       0.377000
54026     54026     neimenggu      120.9000       44.5667           62       204     2012      06        12        164              0.000000      18.877808      27.999395       0.240768   -9999.000000   -9999.000000       0.206500       0.919000
54026     54026     neimenggu      120.9000       44.5667           62       204     2012      06        13        165              0.000000      15.691406       1.316434       0.328229       0.365000   -9999.000000       0.210100       0.949000
54026     54026     neimenggu      120.9000       44.5667           62       204     2012      06        14        166              0.000000      19.388611      46.845642       0.290976       0.401500       0.152500       0.204800       0.709000
54026     54026     neimenggu      120.9000       44.5667           62       204     2012      06        15        167              0.000000      17.685211      12.098699       0.334333       0.445000       0.637500       0.239400       0.985000
54026     54026     neimenggu      120.9000       44.5667           62       204     2012      06        16        168              0.000000      16.885101       4.353959       0.328456       0.323000       0.178500       0.220000   -9999.000000
54026     54026     neimenggu      120.9000       44.5667           62       204     2012      06        17        169              0.000000      22.008881       6.930790       0.305620       0.307000   -9999.000000       0.197900       0.797000
54026     54026     neimenggu      120.9000       44.5667           62       204     2012      06        18        170              0.000000      20.660492       0.000000       0.309035       0.291000   -9999.000000       0.180900       0.825000
54026     54026     neimenggu      120.9000       44.5667           62       204     2012      06        19        171              0.000000      23.569580       0.000000       0.288258       0.233000       0.174900       0.154100       0.568000
54026     54026     neimenggu      120.9000       44.5667           62       204     2012      06        20        172              0.000000      25.431610       0.000000       0.274812       0.184500       0.110300       0.111400       0.495000
54026     54026     neimenggu      120.9000       44.5667           62       204     2012      06        21        173              0.000000      26.551727       0.000000       0.264803       0.156000   -9999.000000       0.108200   -9999.000000
54026     54026     neimenggu      120.9000       44.5667           62       204     2012      06        22        174              0.000000      27.003235       1.156609       0.255926       0.181000       0.037300       0.117700       0.479000
54026     54026     neimenggu      120.9000       44.5667           62       204     2012      06        23        175              0.000000      26.493530       2.984931       0.249025       0.166000   -9999.000000       0.124300       0.447000
54026     54026     neimenggu      120.9000       44.5667           62       204     2012      06        24        176              0.000000      26.519073       7.888666       0.250752       0.305000       0.212600       0.185900   -9999.000000
54026     54026     neimenggu      120.9000       44.5667           62       204     2012      06        25        177              0.000000      24.893402       3.007929       0.280559       0.279500       0.233000   -9999.000000       0.660000
54026     54026     neimenggu      120.9000       44.5667           62       204     2012      06        26        178              0.000000      24.847534       3.571563       0.267220       0.224000       0.275100       0.127300       0.603000
54026     54026     neimenggu      120.9000       44.5667           62       204     2012      06        27        179              0.000000      26.455109       9.103276       0.260947       0.251500       0.313700       0.167700       0.780000
54026     54026     neimenggu      120.9000       44.5667           62       204     2012      06        28        180              0.000000      25.884491       4.508307       0.295958       0.201000       0.130600       0.192100       0.732000
54026     54026     neimenggu      120.9000       44.5667           62       204     2012      06        29        181              0.000000      24.642731       0.630721       0.283354       0.231000       0.264500       0.160700   -9999.000000
54026     54026     neimenggu      120.9000       44.5667           62       204     2012      06        30        182              0.000000      24.786041       2.277421       0.275003       0.191000       0.223700       0.129100   -9999.000000
54026     54026     neimenggu      120.9000       44.5667           62       204     2012      07        01        183              0.000000      27.038422       0.602020       0.261448       0.272000       0.112400       0.114300       0.614000
54026     54026     neimenggu      120.9000       44.5667           62       204     2012      07        02        184              0.000000      22.555603       2.475772       0.259095       0.190000       0.067500       0.122100       0.642000
54026     54026     neimenggu      120.9000       44.5667           62       204     2012      07        03        185              0.000000      22.443359       1.061551       0.261679       0.302000       0.313800       0.190000       0.746000
54026     54026     neimenggu      120.9000       44.5667           62       204     2012      07        04        186              0.000000      22.675354       0.000000       0.263207       0.258000       0.224000       0.114000       0.578000
54026     54026     neimenggu      120.9000       44.5667           62       204     2012      07        05        187              0.000000      26.244690       0.108949       0.249514       0.210000       0.115400       0.124400       0.664000
54026     54026     neimenggu      120.9000       44.5667           62       204     2012      07        06        188              0.000000      27.107971       0.000000       0.240742   -9999.000000   -9999.000000       0.115900       0.588000
54026     54026     neimenggu      120.9000       44.5667           62       204     2012      07        07        189              0.000000      28.457825       1.426723       0.229869   -9999.000000       0.069500       0.095300   -9999.000000
54026     54026     neimenggu      120.9000       44.5667           62       204     2012      07        08        190              0.000000      29.274170       5.202685       0.225158       0.186000       0.118500       0.100200       0.725000
54026     54026     neimenggu      120.9000       44.5667           62       204     2012      07        09        191              0.000000      28.895325       2.379862       0.225989       0.201000       0.083600       0.134300       0.530000
54026     54026     neimenggu      120.9000       44.5667           62       204     2012      07        10        192              0.000000      28.833984      23.054092       0.234528   -9999.000000       0.242600       0.167500       0.675000
54026     54026     neimenggu      120.9000       44.5667           62       204     2012      07        11        193              0.000000      23.872742      11.140622       0.264493       0.411000   -9999.000000       0.220600       1.000000
54026     54026     neimenggu      120.9000       44.5667           62       204     2012      07        12        194              0.000000      21.178467       1.867500       0.316401       0.408000       0.169500   -9999.000000       1.000000
54026     54026     neimenggu      120.9000       44.5667           62       204     2012      07        13        195              0.000000      21.762299       0.000000       0.295891       0.324500       0.203200       0.193900       0.878000
54026     54026     neimenggu      120.9000       44.5667           62       204     2012      07        14        196              0.000000      24.735962       0.000000       0.274982       0.243000       0.142000       0.162900       0.755000
54026     54026     neimenggu      120.9000       44.5667           62       204     2012      07        15        197              0.000000      26.739594       0.000000       0.261945   -9999.000000       0.166200       0.134100   -9999.000000
54026     54026     neimenggu      120.9000       44.5667           62       204     2012      07        16        198              0.000000      28.088013       0.000000       0.251089       0.218500   -9999.000000       0.141600       0.619000
54026     54026     neimenggu      120.9000       44.5667           62       204     2012      07        17        199              0.000000      29.111511       0.000000       0.241862       0.197000       0.064200       0.148400       0.516000
54026     54026     neimenggu      120.9000       44.5667           62       204     2012      07        18        200              0.000000      28.960663       0.000000       0.231596       0.162000       0.056800       0.130700       0.585000
54026     54026     neimenggu      120.9000       44.5667           62       204     2012      07        19        201              0.000000      28.267792       0.000000       0.226479       0.188000       0.063900       0.130200       0.626000
54026     54026     neimenggu      120.9000       44.5667           62       204     2012      07        20        202              0.027125      29.066193       2.090061       0.219463       0.249000       0.030700       0.159600   -9999.000000
54026     54026     neimenggu      120.9000       44.5667           62       204     2012      07        21        203              0.083917      27.882416      29.024937       0.232064   -9999.000000       0.098800       0.153200       1.000000
54026     54026     neimenggu      120.9000       44.5667           62       204     2012      07        22        204              0.286542      27.310211      48.484779       0.287173       0.491000       0.247600       0.216200       1.000000
54026     54026     neimenggu      120.9000       44.5667           62       204     2012      07        23        205              0.240143      21.476410       0.000000       0.343468       0.406000       0.337700   -9999.000000   -9999.000000
54026     54026     neimenggu      120.9000       44.5667           62       204     2012      07        24        206              0.000000      26.063232       0.000000       0.297699       0.371000   -9999.000000       0.209000       0.839000
54026     54026     neimenggu      120.9000       44.5667           62       204     2012      07        25        207              0.000000      27.344360       0.450116       0.284010       0.332000       0.194700       0.199000       0.744000
54026     54026     neimenggu      120.9000       44.5667           62       204     2012      07        26        208              0.149900      27.784546       0.000000       0.277154       0.316000       0.104900       0.167700       0.602000
54026     54026     neimenggu      120.9000       44.5667           62       204     2012      07        27        209              0.123500      27.066071       0.000000       0.264370       0.298000       0.136800       0.163100       0.628000
54026     54026     neimenggu      120.9000       44.5667           62       204     2012      07        28        210              0.235333      27.595551      78.018387       0.255440       0.500000       0.515000       0.239500   -9999.000000
54026     54026     neimenggu      120.9000       44.5667           62       204     2012      07        29        211              0.269417      22.152222       2.156204       0.395229       0.412000       0.104500   -9999.000000       0.869000
54026     54026     neimenggu      120.9000       44.5667           62       204     2012      07        30        212              0.236917      21.880249       0.000000       0.316838       0.362000       0.163700       0.203400       0.793000
54026     54026     neimenggu      120.9000       44.5667           62       204     2012      07        31        213              0.214417      23.455688       0.000000       0.292884       0.390000       0.210900       0.192900       0.784000
54026     54026     neimenggu      120.9000       44.5667           62       204     2012      08        01        214              0.196583      24.016754      11.410736       0.282269   -9999.000000       0.150400       0.173800       0.770000
54026     54026     neimenggu      120.9000       44.5667           62       204     2012      08        02        215              0.183792      24.344818       0.000000       0.297558       0.412500       0.148100       0.165000       0.710000
54026     54026     neimenggu      120.9000       44.5667           62       204     2012      08        03        216              0.173458      24.215332       0.000000       0.289759       0.353000       0.074400       0.168000       0.687000
54026     54026     neimenggu      120.9000       44.5667           62       204     2012      08        04        217              0.163375      25.201385       0.000000       0.277793       0.376000       0.199800       0.150800       0.680000
54026     54026     neimenggu      120.9000       44.5667           62       204     2012      08        05        218              0.147750      25.840240       0.000000       0.271339       0.379000   -9999.000000       0.146200   -9999.000000
54026     54026     neimenggu      120.9000       44.5667           62       204     2012      08        06        219              0.129125      27.851837       0.000000       0.263521       0.457000       0.157300       0.179600       0.661000
54026     54026     neimenggu      120.9000       44.5667           62       204     2012      08        07        220              0.111583      28.511078       0.000000       0.256214       0.398000       0.058300   -9999.000000       0.633000
54026     54026     neimenggu      120.9000       44.5667           62       204     2012      08        08        221              0.102000      29.367584       0.015570       0.249973       0.361000   -9999.000000       0.185600       0.632000
54026     54026     neimenggu      120.9000       44.5667           62       204     2012      08        09        222              0.091167      26.493866       0.113502       0.246458       0.385000       0.074600   -9999.000000       0.599000
54026     54026     neimenggu      120.9000       44.5667           62       204     2012      08        10        223              0.083875      25.286896       1.015348       0.239171       0.368500   -9999.000000       0.167600       0.540000
54026     54026     neimenggu      120.9000       44.5667           62       204     2012      08        11        224              0.143375      24.229034      13.985830       0.239457       0.479000   -9999.000000       0.228700       0.681000
54026     54026     neimenggu      120.9000       44.5667           62       204     2012      08        12        225              0.192667      19.499298       0.000000       0.294890       0.476000   -9999.000000       0.201700       0.797000
54026     54026     neimenggu      120.9000       44.5667           62       204     2012      08        13        226              0.173000      22.845032       0.000000       0.275562       0.370000       0.356400       0.187100   -9999.000000
54026     54026     neimenggu      120.9000       44.5667           62       204     2012      08        14        227              0.159625      23.909454       0.110671       0.262903       0.290000   -9999.000000       0.192800       0.657000
54026     54026     neimenggu      120.9000       44.5667           62       204     2012      08        15        228              0.147292      23.906738       0.000000       0.258230       0.384000       0.096600       0.174100       0.579000
54026     54026     neimenggu      120.9000       44.5667           62       204     2012      08        16        229              0.145208      25.019409       0.000000       0.250842       0.416000   -9999.000000       0.171700       0.623000
54026     54026     neimenggu      120.9000       44.5667           62       204     2012      08        17        230              0.143167      25.740509       0.490530       0.243991   -9999.000000       0.028400       0.187800       0.620000
54026     54026     neimenggu      120.9000       44.5667           62       204     2012      08        18        231              0.140833      25.431488       0.000000       0.245209       0.409500   -9999.000000       0.180500   -9999.000000
54026     54026     neimenggu      120.9000       44.5667           62       204     2012      08        19        232              0.140333      23.882996       0.000000       0.239058       0.364000       0.049000       0.193200       0.566000
54026     54026     neimenggu      120.9000       44.5667           62       204     2012      08        20        233              0.017083      24.724182       0.000000       0.232772       0.369500   -9999.000000       0.190200       0.536000
54026     54026     neimenggu      120.9000       44.5667           62       204     2012      08        21        234              0.030000      20.166565       0.000000       0.230570       0.317500   -9999.000000       0.157900   -9999.000000
54026     54026     neimenggu      120.9000       44.5667           62       204     2012      08        22        235              0.045000      20.541168       0.000000       0.225847       0.329000       0.054800       0.170700   -9999.000000
54026     54026     neimenggu      120.9000       44.5667           62       204     2012      08        23        236              0.045000      20.457703       0.000000       0.221815       0.340500   -9999.000000       0.185400       0.618000
54026     54026     neimenggu      120.9000       44.5667           62       204     2012      08        24        237              0.045000      23.424683       0.000000       0.218413       0.321000       0.113500       0.176600   -9999.000000
54026     54026     neimenggu      120.9000       44.5667           62       204     2012      08        25        238              0.000000      24.879852       0.000000       0.214268       0.258000   -9999.000000       0.192200   -9999.000000
54026     54026     neimenggu      120.9000       44.5667           62       204     2012      08        26        239              0.045000      25.708588       0.000000       0.210416       0.302000   -9999.000000   -9999.000000   -9999.000000
54026     54026     neimenggu      120.9000       44.5667           62       204     2012      08        27        240              0.045000      25.481201       0.000000       0.207071       0.364000       0.070700       0.162500       0.587000
54026     54026     neimenggu      120.9000       44.5667           62       204     2012      08        28        241              0.045000      25.547760       0.000000       0.205846       0.349000       0.091700       0.172500       0.567000
54026     54026     neimenggu      120.9000       44.5667           62       204     2012      08        29        242              0.045000      26.323730       0.000000       0.203194       0.316500   -9999.000000       0.164000       0.507000
54026     54026     neimenggu      120.9000       44.5667           62       204     2012      08        30        243              0.045000      24.759735       0.000000       0.195733       0.255000       0.072200       0.173100       0.510000
54026     54026     neimenggu      120.9000       44.5667           62       204     2012      08        31        244              0.045000      26.519165       0.000000       0.191187       0.290000   -9999.000000       0.177000       0.544000
54026     54026     neimenggu      120.9000       44.5667           62       204     2012      09        01        245              0.045000      27.451447       0.343408       0.188627       0.260500       0.071900       0.164100       0.627000
54026     54026     neimenggu      120.9000       44.5667           62       204     2012      09        02        246              0.045000      27.096863      17.155226       0.186969       0.471000       0.054700       0.207000       0.893000
54026     54026     neimenggu      120.9000       44.5667           62       204     2012      09        03        247              0.045000      18.477448       0.338494       0.284817       0.446500   -9999.000000       0.268200   -9999.000000
54026     54026     neimenggu      120.9000       44.5667           62       204     2012      09        04        248              0.045000      18.614563       2.303328       0.264705       0.426000       0.248400       0.194100       0.827000
54026     54026     neimenggu      120.9000       44.5667           62       204     2012      09        05        249              0.045000      16.867767       2.500581       0.267122       0.386000       0.151100       0.197900       0.817000
54026     54026     neimenggu      120.9000       44.5667           62       204     2012      09        06        250              0.045000      19.651001       0.000000       0.264320       0.300500       0.362200       0.181300       0.576000
54026     54026     neimenggu      120.9000       44.5667           62       204     2012      09        07        251              0.045000      21.679626       0.000000       0.253852       0.289000       0.305200       0.180500       0.604000
54026     54026     neimenggu      120.9000       44.5667           62       204     2012      09        08        252              0.045000      22.572144       0.000000       0.246620       0.302500   -9999.000000       0.169000       0.566000
54026     54026     neimenggu      120.9000       44.5667           62       204     2012      09        09        253              0.045000      22.801605       0.000000       0.241340       0.277000       0.153200       0.177400       0.492000
54026     54026     neimenggu      120.9000       44.5667           62       204     2012      09        10        254              0.045000      22.621155       1.874562       0.234977       0.212000       0.180900       0.151000       0.551000
54026     54026     neimenggu      120.9000       44.5667           62       204     2012      09        11        255              0.045000      24.245667      14.912855       0.236746       0.272500       0.177600       0.198700       0.549000
54026     54026     neimenggu      120.9000       44.5667           62       204     2012      09        12        256              0.045000      20.280609       2.672271       0.281751       0.364000       0.418400   -9999.000000       0.763000
54026     54026     neimenggu      120.9000       44.5667           62       204     2012      09        13        257              0.045000      15.800903       0.536871       0.290339       0.326000       0.324600       0.232300       0.857000
54026     54026     neimenggu      120.9000       44.5667           62       204     2012      09        14        258              0.045000      16.332306       0.000000       0.272027       0.265500       0.168800       0.213800       0.549000
54026     54026     neimenggu      120.9000       44.5667           62       204     2012      09        15        259              0.045000      17.686981       0.000000       0.263548   -9999.000000       0.066500       0.155700       0.561000
54026     54026     neimenggu      120.9000       44.5667           62       204     2012      09        16        260              0.045000      19.142059       0.000000       0.256931       0.227000   -9999.000000       0.156200   -9999.000000
54026     54026     neimenggu      120.9000       44.5667           62       204     2012      09        17        261              0.149333      18.810577       0.000000       0.251647       0.222000       0.133000       0.167200       0.481000
54026     54026     neimenggu      120.9000       44.5667           62       204     2012      09        18        262              0.208333      19.243927       0.000000       0.247116       0.251000       0.107300       0.157900       0.484000
54026     54026     neimenggu      120.9000       44.5667           62       204     2012      09        19        263              0.203250      19.969940       3.438551       0.243363       0.241500       0.184800       0.157400   -9999.000000
54026     54026     neimenggu      120.9000       44.5667           62       204     2012      09        20        264              0.199125      20.192291       0.000000       0.240711       0.238000   -9999.000000       0.165100       0.488000
54026     54026     neimenggu      120.9000       44.5667           62       204     2012      09        21        265              0.195250      20.970398       0.000000       0.237910   -9999.000000   -9999.000000       0.157500       0.506000
54026     54026     neimenggu      120.9000       44.5667           62       204     2012      09        22        266              0.190875      21.493103       0.235786       0.235500       0.172500       0.061800       0.172800       0.466000
54026     54026     neimenggu      120.9000       44.5667           62       204     2012      09        23        267              0.187792      20.694427       0.000000       0.234535       0.201000       0.101600   -9999.000000       0.459000
54026     54026     neimenggu      120.9000       44.5667           62       204     2012      09        24        268              0.184083      19.993256       0.000000       0.232828       0.178000       0.038000       0.144000   -9999.000000
54026     54026     neimenggu      120.9000       44.5667           62       204     2012      09        25        269              0.179417      18.090607       6.330956       0.233067       0.221000       0.340200       0.161000       0.818000
54026     54026     neimenggu      120.9000       44.5667           62       204     2012      09        26        270              0.177917      16.164825       2.121358       0.265745       0.177000       0.115700       0.165100       0.462000
54026     54026     neimenggu      120.9000       44.5667           62       204     2012      09        27        271              0.224000      16.863678      47.110348       0.259023       0.225000       0.162800       0.168100       0.872000
54026     54026     neimenggu      120.9000       44.5667           62       204     2012      09        28        272              0.321533      12.083282      13.971741       0.339626       0.278000   -9999.000000       0.293700       0.808000
54026     54026     neimenggu      120.9000       44.5667           62       204     2012      09        29        273              0.290500      10.937469       0.000000       0.325737   -9999.000000   -9999.000000   -9999.000000       0.845000
54026     54026     neimenggu      120.9000       44.5667           62       204     2012      09        30        274              0.270750      12.876160       0.000000       0.297425       0.271500   -9999.000000       0.240900       0.539000
54026     54026     neimenggu      120.9000       44.5667           62       204     2012      10        01        275              0.259125      14.325256       0.000000       0.288357       0.208000   -9999.000000       0.219900       0.573000
54026     54026     neimenggu      120.9000       44.5667           62       204     2012      10        02        276              0.307000      15.810486      10.144283       0.281559       0.178000       0.248900       0.159400   -9999.000000
54026     54026     neimenggu      120.9000       44.5667           62       204     2012      10        03        277              0.310917      17.227264       0.253021       0.295483       0.199000       0.139000       0.159800       0.625000
54026     54026     neimenggu      120.9000       44.5667           62       204     2012      10        04        278              0.304417      13.715576       0.000000       0.291226       0.203000   -9999.000000       0.184900       0.642000
54026     54026     neimenggu      120.9000       44.5667           62       204     2012      10        05        279              0.298333      15.000916       0.000000       0.280031       0.186000       0.231500       0.162800       0.533000
54026     54026     neimenggu      120.9000       44.5667           62       204     2012      10        06        280              0.296542      13.524872       0.000000       0.274047       0.170500       0.065400       0.160400       0.490000
54026     54026     neimenggu      120.9000       44.5667           62       204     2012      10        07        281              0.294167      14.139832       0.000000       0.270440       0.137000       0.171900       0.164600       0.497000
54026     54026     neimenggu      120.9000       44.5667           62       204     2012      10        08        282              0.292542      15.451721       0.281039       0.267506       0.164500       0.289900       0.113900       0.510000
54026     54026     neimenggu      120.9000       44.5667           62       204     2012      10        09        283              0.294167      16.745728       4.237586       0.265056   -9999.000000   -9999.000000       0.159000       0.826000
54026     54026     neimenggu      120.9000       44.5667           62       204     2012      10        10        284              0.297208      11.337280       0.000000       0.281722   -9999.000000       0.212300   -9999.000000       0.935000
54026     54026     neimenggu      120.9000       44.5667           62       204     2012      10        11        285              0.295500      10.435394       0.000000       0.270372       0.159500       0.100400       0.143900       0.617000
54026     54026     neimenggu      120.9000       44.5667           62       204     2012      10        12        286              0.292667      11.642487       0.524554       0.266916       0.152000       0.115900       0.147800       0.636000
54026     54026     neimenggu      120.9000       44.5667           62       204     2012      10        13        287              0.291042      10.558990       0.000000       0.266478       0.166000       0.102000       0.153200       0.604000
54026     54026     neimenggu      120.9000       44.5667           62       204     2012      10        14        288              0.289208       8.640411       0.000000       0.263897       0.137000   -9999.000000       0.128300       0.546000
54026     54026     neimenggu      120.9000       44.5667           62       204     2012      10        15        289              0.288250       8.384583       0.493537       0.261901       0.169000       0.383600       0.123400   -9999.000000
54026     54026     neimenggu      120.9000       44.5667           62       204     2012      10        16        290              0.290542       9.448914       1.614739       0.261096   -9999.000000       0.219700       0.177000       0.742000
54026     54026     neimenggu      120.9000       44.5667           62       204     2012      10        17        291              0.291042       6.366516       1.389722       0.269675       0.206000       0.348800       0.148200       0.683000
54026     54026     neimenggu      120.9000       44.5667           62       204     2012      10        18        292              0.289125       5.641479       0.194542       0.266735       0.158000       0.214600       0.136900   -9999.000000
54026     54026     neimenggu      120.9000       44.5667           62       204     2012      10        19        293              0.288000       4.936188       0.288740       0.266553       0.151000       0.253500       0.117900       0.529000
54026     54026     neimenggu      120.9000       44.5667           62       204     2012      10        20        294              0.285167       7.143768       1.585562       0.263971   -9999.000000   -9999.000000       0.113500       0.325000
54026     54026     neimenggu      120.9000       44.5667           62       204     2012      10        21        295              0.282875       4.629364       4.946498       0.267239   -9999.000000   -9999.000000       0.110900       0.432000
54026     54026     neimenggu      120.9000       44.5667           62       204     2012      10        22        296              0.283167       4.027161       2.344413       0.283809   -9999.000000   -9999.000000       0.106400       0.458000
54026     54026     neimenggu      120.9000       44.5667           62       204     2012      10        23        297              0.282208       6.009857       0.398950       0.275372   -9999.000000       0.122700       0.101100   -9999.000000
54026     54026     neimenggu      120.9000       44.5667           62       204     2012      10        24        298              0.281708       7.114563       0.000000       0.270434   -9999.000000       0.116600       0.097700       0.508000
54026     54026     neimenggu      120.9000       44.5667           62       204     2012      10        25        299              0.000000       8.194855       0.000000       0.267574       0.132000       0.128800       0.085700       0.409000
54026     54026     neimenggu      120.9000       44.5667           62       204     2012      10        26        300              0.281792       8.817627       0.154788       0.265838       0.133000       0.289900       0.102600       0.390000
54026     54026     neimenggu      120.9000       44.5667           62       204     2012      10        27        301              0.280292      10.917084       0.314097       0.265490       0.142000   -9999.000000   -9999.000000       0.377000
54026     54026     neimenggu      120.9000       44.5667           62       204     2012      10        28        302              0.000000       7.977936       0.925686       0.263152       0.140000       0.147500       0.091500       0.313000
54026     54026     neimenggu      120.9000       44.5667           62       204     2012      10        29        303              0.274167       4.085052       4.436667       0.259848   -9999.000000   -9999.000000       0.092900       0.371000
54026     54026     neimenggu      120.9000       44.5667           62       204     2012      10        30        304              0.270417       1.218903       2.532396       0.231113   -9999.000000       0.087200       0.072800       0.086000
54026     54026     neimenggu      120.9000       44.5667           62       204     2012      10        31        305              0.267958       0.186829       0.800705       0.191801   -9999.000000       0.104800       0.076700   -9999.000000
54026     54026     neimenggu      120.9000       44.5667           62       204     2012      11        01        306              0.267292      -0.105988       1.868384       0.189082       0.144000   -9999.000000       0.085500       0.302000
54026     54026     neimenggu      120.9000       44.5667           62       204     2012      11        02        307              0.269500       0.352997       0.000000       0.190198   -9999.000000       0.048300       0.084300       0.332000
54026     54026     neimenggu      120.9000       44.5667           62       204     2012      11        03        308              0.271000       0.651581       0.000000       0.200838       0.116000       0.242200       0.084100       0.403000
54026     54026     neimenggu      120.9000       44.5667           62       204     2012      11        04        309              0.271000       0.773224       0.000000       0.209322   -9999.000000       0.099100       0.089500       0.387000
54026     54026     neimenggu      120.9000       44.5667           62       204     2012      11        05        310              0.270583       0.798950       0.000000       0.211183   -9999.000000   -9999.000000       0.074500       0.277000
54026     54026     neimenggu      120.9000       44.5667           62       204     2012      11        06        311              0.268917       1.383270       0.000000       0.218169   -9999.000000       0.032800       0.077000       0.285000
54026     54026     neimenggu      120.9000       44.5667           62       204     2012      11        07        312              0.267417       1.343048       0.423887       0.205685       0.130000       0.070500       0.078900       0.318000
54026     54026     neimenggu      120.9000       44.5667           62       204     2012      11        08        313              0.267333       1.372833       0.389377       0.222317       0.143000       0.189900   -9999.000000   -9999.000000
54026     54026     neimenggu      120.9000       44.5667           62       204     2012      11        09        314              0.267250       2.022583       0.000000       0.217639       0.137000   -9999.000000       0.075000       0.303000
54026     54026     neimenggu      120.9000       44.5667           62       204     2012      11        10        315              0.267417       1.507294       0.338574       0.217289       0.122000       0.032600       0.075400       0.251000
54026     54026     neimenggu      120.9000       44.5667           62       204     2012      11        11        316              0.268000       1.173218       0.151498       0.224966   -9999.000000   -9999.000000       0.074200       0.207000
54026     54026     neimenggu      120.9000       44.5667           62       204     2012      11        12        317              0.267667       0.511749       2.939578       0.204205   -9999.000000   -9999.000000       0.067700       0.348000
54026     54026     neimenggu      120.9000       44.5667           62       204     2012      11        13        318              0.000000      -1.488800       0.000000       0.140199   -9999.000000   -9999.000000   -9999.000000   -9999.000000
54026     54026     neimenggu      120.9000       44.5667           62       204     2012      11        14        319              0.255792      -2.230225       0.000000       0.120278   -9999.000000   -9999.000000       0.059200       0.348000
54026     54026     neimenggu      120.9000       44.5667           62       204     2012      11        15        320              0.252750      -2.542816       0.000000       0.128835   -9999.000000       0.084900       0.065200       0.323000
54026     54026     neimenggu      120.9000       44.5667           62       204     2012      11        16        321              0.256958      -1.411163       0.000000       0.130536   -9999.000000       0.074700       0.055600   -9999.000000
54026     54026     neimenggu      120.9000       44.5667           62       204     2012      11        17        322              0.000000      -2.078339       0.000000       0.133095   -9999.000000       0.047400       0.058300       0.350000
54026     54026     neimenggu      120.9000       44.5667           62       204     2012      11        18        323              0.198625      -3.196136       0.000000       0.122729   -9999.000000       0.032100       0.060000       0.214000
54026     54026     neimenggu      120.9000       44.5667           62       204     2012      11        19        324              0.196083      -4.449127       0.000000       0.101796   -9999.000000   -9999.000000       0.042600       0.282000
54026     54026     neimenggu      120.9000       44.5667           62       204     2012      11        20        325              0.173917      -3.585907       0.000000       0.114933   -9999.000000       0.078900       0.043800       0.280000
54026     54026     neimenggu      120.9000       44.5667           62       204     2012      11        21        326              0.167625      -3.597137       0.000000       0.116861   -9999.000000       0.141900       0.048000   -9999.000000
54026     54026     neimenggu      120.9000       44.5667           62       204     2012      11        22        327              0.164542      -2.456451       0.000000       0.123925   -9999.000000       0.055400       0.045000       0.291000
54026     54026     neimenggu      120.9000       44.5667           62       204     2012      11        23        328              0.156333      -4.818939       0.000000       0.110107   -9999.000000       0.157500       0.050400       0.286000
54026     54026     neimenggu      120.9000       44.5667           62       204     2012      11        24        329              0.153167      -5.017639       0.000000       0.102658   -9999.000000       0.113800   -9999.000000       0.240000
54026     54026     neimenggu      120.9000       44.5667           62       204     2012      11        25        330              0.151083      -5.130707       0.000000       0.101566   -9999.000000       0.090600       0.040700       0.238000
54026     54026     neimenggu      120.9000       44.5667           62       204     2012      11        26        331              0.147875      -4.864990       0.000000       0.102739   -9999.000000       0.092400   -9999.000000       0.250000
54026     54026     neimenggu      120.9000       44.5667           62       204     2012      11        27        332              0.146750      -6.587799       0.000000       0.097774   -9999.000000       0.049000       0.051200       0.272000
54026     54026     neimenggu      120.9000       44.5667           62       204     2012      11        28        333              0.145167      -7.034454       0.000000       0.095660   -9999.000000       0.018000       0.052200       0.251000
54026     54026     neimenggu      120.9000       44.5667           62       204     2012      11        29        334              0.141958      -7.451050       0.000000       0.095456   -9999.000000   -9999.000000       0.056300   -9999.000000
54026     54026     neimenggu      120.9000       44.5667           62       204     2012      11        30        335              0.138792     -10.165741       0.000000       0.092719   -9999.000000       0.063500   -9999.000000       0.172000
54026     54026     neimenggu      120.9000       44.5667           62       204     2012      12        01        336              0.139250     -11.652863       0.000000       0.090402   -9999.000000   -9999.000000       0.049000       0.209000
54026     54026     neimenggu      120.9000       44.5667           62       204     2012      12        02        337              0.141125     -10.196686       0.000000       0.090250   -9999.000000   -9999.000000       0.052700       0.183000
54026     54026     neimenggu      120.9000       44.5667           62       204     2012      12        03        338              0.138417      -7.006195       0.000000       0.092656   -9999.000000       0.102200       0.052900       0.189000
54026     54026     neimenggu      120.9000       44.5667           62       204     2012      12        04        339              0.136750      -9.913055       0.000000       0.090863   -9999.000000       0.176600       0.056100       0.125000
54026     54026     neimenggu      120.9000       44.5667           62       204     2012      12        05        340              0.135458     -10.329651       0.000000       0.090305   -9999.000000       0.088100       0.060300       0.117000
54026     54026     neimenggu      120.9000       44.5667           62       204     2012      12        06        341              0.133000     -12.744965       0.000000       0.089516   -9999.000000       0.060900       0.051100       0.075000
54026     54026     neimenggu      120.9000       44.5667           62       204     2012      12        07        342              0.131833     -14.145233       0.000000       0.088598   -9999.000000   -9999.000000       0.051300   -9999.000000
54026     54026     neimenggu      120.9000       44.5667           62       204     2012      12        08        343              0.132500     -14.763519       0.000000       0.087932   -9999.000000   -9999.000000       0.061800       0.232000
54026     54026     neimenggu      120.9000       44.5667           62       204     2012      12        09        344              0.134625     -13.209290       0.000000       0.088302   -9999.000000   -9999.000000       0.059600       0.201000
54026     54026     neimenggu      120.9000       44.5667           62       204     2012      12        10        345              0.134542     -10.595551       0.000000       0.089295   -9999.000000   -9999.000000       0.060500       0.161000
54026     54026     neimenggu      120.9000       44.5667           62       204     2012      12        11        346              0.134208      -9.338074       0.000000       0.089403   -9999.000000   -9999.000000   -9999.000000       0.242000
54026     54026     neimenggu      120.9000       44.5667           62       204     2012      12        12        347              0.134083     -10.080872       0.000000       0.089001   -9999.000000   -9999.000000       0.052600   -9999.000000
54026     54026     neimenggu      120.9000       44.5667           62       204     2012      12        13        348              0.134042     -10.588440       0.000000       0.088630   -9999.000000   -9999.000000       0.056700       0.186000
54026     54026     neimenggu      120.9000       44.5667           62       204     2012      12        14        349              0.134625      -9.403259       0.000000       0.089069   -9999.000000   -9999.000000       0.057600       0.121000
54026     54026     neimenggu      120.9000       44.5667           62       204     2012      12        15        350              0.000000     -10.178894       0.000000       0.088895   -9999.000000   -9999.000000       0.054100   -9999.000000
54026     54026     neimenggu      120.9000       44.5667           62       204     2012      12        16        351              0.135292     -11.479736       0.000000       0.088675   -9999.000000   -9999.000000       0.055500       0.185000
54026     54026     neimenggu      120.9000       44.5667           62       204     2012      12        17        352              0.133750     -11.255646       0.000000       0.088578   -9999.000000   -9999.000000       0.048800       0.153000
54026     54026     neimenggu      120.9000       44.5667           62       204     2012      12        18        353              0.132500     -12.916016       1.130785       0.087903   -9999.000000   -9999.000000   -9999.000000       0.146000
54026     54026     neimenggu      120.9000       44.5667           62       204     2012      12        19        354              0.131917     -12.311584       0.000000       0.088099   -9999.000000   -9999.000000       0.053300       0.164000
54026     54026     neimenggu      120.9000       44.5667           62       204     2012      12        20        355              0.000000     -10.912689       0.000000       0.088792   -9999.000000   -9999.000000       0.053800   -9999.000000
54026     54026     neimenggu      120.9000       44.5667           62       204     2012      12        21        356              0.133000      -9.721710       0.000000       0.089164   -9999.000000   -9999.000000       0.057700       0.199000
54026     54026     neimenggu      120.9000       44.5667           62       204     2012      12        22        357              0.131042      -9.851959       0.000000       0.089365   -9999.000000   -9999.000000       0.058900       0.190000
54026     54026     neimenggu      120.9000       44.5667           62       204     2012      12        23        358              0.130083     -12.542694       0.000000       0.088865   -9999.000000   -9999.000000   -9999.000000       0.177000
54026     54026     neimenggu      120.9000       44.5667           62       204     2012      12        24        359              0.129842     -14.852173       0.000000       0.087328   -9999.000000   -9999.000000       0.051000       0.102000
54026     54026     neimenggu      120.9000       44.5667           62       204     2012      12        25        360              0.129083     -15.217865       0.000000       0.086340   -9999.000000   -9999.000000       0.062300       0.172000
54026     54026     neimenggu      120.9000       44.5667           62       204     2012      12        26        361              0.000000     -16.687927       0.000000       0.085576   -9999.000000   -9999.000000       0.060900       0.208000
54026     54026     neimenggu      120.9000       44.5667           62       204     2012      12        27        362              0.130385     -14.817047       0.000000       0.085274   -9999.000000   -9999.000000       0.062900       0.185000
54026     54026     neimenggu      120.9000       44.5667           62       204     2012      12        28        363              0.000000     -13.429413       3.204002       0.085522   -9999.000000   -9999.000000   -9999.000000   -9999.000000
54026     54026     neimenggu      120.9000       44.5667           62       204     2012      12        29        364              0.000000     -12.068909       0.000000       0.085905   -9999.000000   -9999.000000   -9999.000000       0.116000
54026     54026     neimenggu      120.9000       44.5667           62       204     2012      12        30        365              0.000000     -10.349609       0.000000       0.086787   -9999.000000   -9999.000000       0.055200       0.166000
54026     54026     neimenggu      120.9000       44.5667           62       204     2012      12        31        366              0.130067      -9.196014       0.000000       0.087215   -9999.000000   -9999.000000       0.050200       0.176000
