# Supplementary material for: Research on Fusing Multisatellite Soil Moisture Data Based on Bayesian Model Averaging
Source: Hindawi journal article supplement (doi:10.1155/2018/9310838), 2018-06-25
Supplement: f1 [file 9310838.f1.zip › 2012_sm00-10cm_daily_ZDB_ZHY_54047_366days_allin.txt]

54047     54047     neimenggu      123.2833       44.1333           63       213     2012      01        01        001              0.000000   -9999.000000       0.000000   -9999.000000   -9999.000000   -9999.000000       0.074800   -9999.000000
54047     54047     neimenggu      123.2833       44.1333           63       213     2012      01        02        002              0.000000     -17.036682       0.000000       0.177215   -9999.000000   -9999.000000       0.078300       0.085000
54047     54047     neimenggu      123.2833       44.1333           63       213     2012      01        03        003              0.000000     -15.348633       0.000000       0.178338   -9999.000000   -9999.000000       0.070500       0.068000
54047     54047     neimenggu      123.2833       44.1333           63       213     2012      01        04        004              0.000000     -15.306091       0.000000       0.178768   -9999.000000   -9999.000000       0.070100       0.110000
54047     54047     neimenggu      123.2833       44.1333           63       213     2012      01        05        005              0.000000     -14.987823       0.000000       0.178450   -9999.000000   -9999.000000       0.077500       0.084000
54047     54047     neimenggu      123.2833       44.1333           63       213     2012      01        06        006              0.000000     -14.640869       0.000000       0.178174   -9999.000000   -9999.000000       0.074300       0.064000
54047     54047     neimenggu      123.2833       44.1333           63       213     2012      01        07        007              0.000000     -15.099365       0.000000       0.177985   -9999.000000   -9999.000000       0.078400       0.096000
54047     54047     neimenggu      123.2833       44.1333           63       213     2012      01        08        008              0.000000     -15.258331       0.000000       0.177615   -9999.000000   -9999.000000   -9999.000000       0.099000
54047     54047     neimenggu      123.2833       44.1333           63       213     2012      01        09        009              0.000000     -15.085144       0.000000       0.177562   -9999.000000   -9999.000000       0.070000   -9999.000000
54047     54047     neimenggu      123.2833       44.1333           63       213     2012      01        10        010              0.000000     -15.618530       0.000000       0.177384   -9999.000000   -9999.000000   -9999.000000       0.134000
54047     54047     neimenggu      123.2833       44.1333           63       213     2012      01        11        011              0.000000     -17.779449       0.000000       0.176984   -9999.000000   -9999.000000       0.073400       0.056000
54047     54047     neimenggu      123.2833       44.1333           63       213     2012      01        12        012              0.000000     -16.695587       0.000000       0.176682   -9999.000000   -9999.000000       0.074700       0.051000
54047     54047     neimenggu      123.2833       44.1333           63       213     2012      01        13        013              0.000000     -13.382324       0.000000       0.177770   -9999.000000   -9999.000000       0.078100       0.098000
54047     54047     neimenggu      123.2833       44.1333           63       213     2012      01        14        014              0.000000     -12.688965       0.000000       0.178237   -9999.000000   -9999.000000       0.069300   -9999.000000
54047     54047     neimenggu      123.2833       44.1333           63       213     2012      01        15        015              0.000000     -13.214539       0.000000       0.178060   -9999.000000   -9999.000000       0.070400       0.144000
54047     54047     neimenggu      123.2833       44.1333           63       213     2012      01        16        016              0.000000     -12.179443       0.000000       0.177806   -9999.000000   -9999.000000       0.079300       0.085000
54047     54047     neimenggu      123.2833       44.1333           63       213     2012      01        17        017              0.000000     -12.998169       0.000000       0.177761   -9999.000000   -9999.000000       0.077900   -9999.000000
54047     54047     neimenggu      123.2833       44.1333           63       213     2012      01        18        018              0.000000     -13.953308       0.000000       0.177344   -9999.000000   -9999.000000       0.083100       0.118000
54047     54047     neimenggu      123.2833       44.1333           63       213     2012      01        19        019              0.000000     -12.998596       0.000000       0.177216   -9999.000000   -9999.000000       0.083500       0.129000
54047     54047     neimenggu      123.2833       44.1333           63       213     2012      01        20        020              0.000000     -13.591919       0.000000       0.177359   -9999.000000   -9999.000000       0.072700       0.099000
54047     54047     neimenggu      123.2833       44.1333           63       213     2012      01        21        021              0.000000     -16.141296       0.000000       0.176344   -9999.000000   -9999.000000       0.073500       0.043000
54047     54047     neimenggu      123.2833       44.1333           63       213     2012      01        22        022              0.000000     -18.281494       0.000000       0.175485   -9999.000000   -9999.000000       0.083000       0.155000
54047     54047     neimenggu      123.2833       44.1333           63       213     2012      01        23        023              0.000000     -18.253616       0.000000       0.175268   -9999.000000   -9999.000000       0.079800       0.079000
54047     54047     neimenggu      123.2833       44.1333           63       213     2012      01        24        024              0.000000     -17.639206       0.000000       0.175297   -9999.000000   -9999.000000       0.083700       0.112000
54047     54047     neimenggu      123.2833       44.1333           63       213     2012      01        25        025              0.000000     -17.954376       0.000000       0.175352   -9999.000000   -9999.000000   -9999.000000       0.092000
54047     54047     neimenggu      123.2833       44.1333           63       213     2012      01        26        026              0.000000     -16.637085       0.000000       0.175265   -9999.000000   -9999.000000       0.074000       0.094000
54047     54047     neimenggu      123.2833       44.1333           63       213     2012      01        27        027              0.000000     -15.590546       0.000000       0.175689   -9999.000000   -9999.000000       0.079000       0.107000
54047     54047     neimenggu      123.2833       44.1333           63       213     2012      01        28        028              0.000000     -16.787567       0.000000       0.175365   -9999.000000   -9999.000000       0.079100       0.096000
54047     54047     neimenggu      123.2833       44.1333           63       213     2012      01        29        029              0.000000     -15.576935       0.000000       0.175384   -9999.000000   -9999.000000       0.081400       0.121000
54047     54047     neimenggu      123.2833       44.1333           63       213     2012      01        30        030              0.000000     -17.231293       0.000000       0.175079   -9999.000000   -9999.000000       0.085700   -9999.000000
54047     54047     neimenggu      123.2833       44.1333           63       213     2012      01        31        031              0.000000     -18.197617       0.000000       0.174632   -9999.000000   -9999.000000       0.078200       0.070000
54047     54047     neimenggu      123.2833       44.1333           63       213     2012      02        01        032              0.000000     -19.929779       0.000000       0.174256   -9999.000000   -9999.000000   -9999.000000       0.127000
54047     54047     neimenggu      123.2833       44.1333           63       213     2012      02        02        033              0.000000     -19.260406       0.000000       0.174232   -9999.000000   -9999.000000       0.081500       0.096000
54047     54047     neimenggu      123.2833       44.1333           63       213     2012      02        03        034              0.000000     -16.101379       0.000000       0.174948   -9999.000000   -9999.000000       0.083100       0.105000
54047     54047     neimenggu      123.2833       44.1333           63       213     2012      02        04        035              0.000000     -14.283600       0.000000       0.175754   -9999.000000   -9999.000000       0.087800       0.132000
54047     54047     neimenggu      123.2833       44.1333           63       213     2012      02        05        036              0.000000     -11.444305       0.000000       0.176247   -9999.000000   -9999.000000       0.087100       0.051000
54047     54047     neimenggu      123.2833       44.1333           63       213     2012      02        06        037              0.000000      -9.817413       0.000000       0.176860   -9999.000000   -9999.000000       0.081300       0.056000
54047     54047     neimenggu      123.2833       44.1333           63       213     2012      02        07        038              0.000000     -12.980042       0.000000       0.176141   -9999.000000   -9999.000000       0.080300   -9999.000000
54047     54047     neimenggu      123.2833       44.1333           63       213     2012      02        08        039              0.000000     -14.538208       0.000000       0.174966   -9999.000000   -9999.000000       0.089500       0.095000
54047     54047     neimenggu      123.2833       44.1333           63       213     2012      02        09        040              0.000000     -13.224762       0.000000       0.175120   -9999.000000   -9999.000000       0.084300       0.089000
54047     54047     neimenggu      123.2833       44.1333           63       213     2012      02        10        041              0.000000     -11.441010       0.000000       0.175613   -9999.000000   -9999.000000       0.089300       0.043000
54047     54047     neimenggu      123.2833       44.1333           63       213     2012      02        11        042              0.000000     -12.723938       0.000000       0.175117   -9999.000000   -9999.000000   -9999.000000       0.065000
54047     54047     neimenggu      123.2833       44.1333           63       213     2012      02        12        043              0.000000     -12.893799       0.000000       0.174923   -9999.000000   -9999.000000       0.083200   -9999.000000
54047     54047     neimenggu      123.2833       44.1333           63       213     2012      02        13        044              0.000000      -8.030731       0.000000       0.177513   -9999.000000   -9999.000000       0.083800       0.084000
54047     54047     neimenggu      123.2833       44.1333           63       213     2012      02        14        045              0.000000      -7.074371       0.000000       0.183553   -9999.000000   -9999.000000       0.081800       0.101000
54047     54047     neimenggu      123.2833       44.1333           63       213     2012      02        15        046              0.000000     -11.726166       0.000000       0.175452   -9999.000000   -9999.000000       0.083600   -9999.000000
54047     54047     neimenggu      123.2833       44.1333           63       213     2012      02        16        047              0.000000     -10.216278       0.000000       0.174763   -9999.000000   -9999.000000       0.087000       0.025000
54047     54047     neimenggu      123.2833       44.1333           63       213     2012      02        17        048              0.000000     -11.949768       0.000000       0.174197   -9999.000000   -9999.000000       0.079000       0.038000
54047     54047     neimenggu      123.2833       44.1333           63       213     2012      02        18        049              0.000000     -12.525238       0.000000       0.173700   -9999.000000   -9999.000000   -9999.000000       0.082000
54047     54047     neimenggu      123.2833       44.1333           63       213     2012      02        19        050              0.000000      -9.728973       0.000000       0.174506   -9999.000000   -9999.000000       0.083700       0.090000
54047     54047     neimenggu      123.2833       44.1333           63       213     2012      02        20        051              0.000000      -7.181671       0.000000       0.184177   -9999.000000       0.033200       0.084900   -9999.000000
54047     54047     neimenggu      123.2833       44.1333           63       213     2012      02        21        052              0.000000     -10.766479       0.000000       0.173893   -9999.000000   -9999.000000       0.091000       0.099000
54047     54047     neimenggu      123.2833       44.1333           63       213     2012      02        22        053              0.000000      -8.535339       0.000000       0.174576   -9999.000000   -9999.000000       0.089600       0.072000
54047     54047     neimenggu      123.2833       44.1333           63       213     2012      02        23        054              0.000000     -10.108154       0.000000       0.174709   -9999.000000   -9999.000000       0.082800       0.093000
54047     54047     neimenggu      123.2833       44.1333           63       213     2012      02        24        055              0.000000      -8.831390       0.000000       0.174976   -9999.000000   -9999.000000       0.081300       0.070000
54047     54047     neimenggu      123.2833       44.1333           63       213     2012      02        25        056              0.000000      -6.478729       0.000000       0.191096   -9999.000000   -9999.000000       0.085300       0.098000
54047     54047     neimenggu      123.2833       44.1333           63       213     2012      02        26        057              0.000000      -8.916718       0.000000       0.182584   -9999.000000   -9999.000000       0.082900       0.060000
54047     54047     neimenggu      123.2833       44.1333           63       213     2012      02        27        058              0.000000      -9.227631       0.000000       0.181180       0.101000   -9999.000000       0.087200       0.127000
54047     54047     neimenggu      123.2833       44.1333           63       213     2012      02        28        059              0.000000      -5.116364       0.000000       0.202558       0.123000       0.297800   -9999.000000   -9999.000000
54047     54047     neimenggu      123.2833       44.1333           63       213     2012      02        29        060              0.000000   -9999.000000       0.000000   -9999.000000   -9999.000000   -9999.000000   -9999.000000   -9999.000000
54047     54047     neimenggu      123.2833       44.1333           63       213     2012      03        01        061              0.000000      -1.692474       0.000000       0.240159       0.116000       0.031700       0.086700       0.135000
54047     54047     neimenggu      123.2833       44.1333           63       213     2012      03        02        062              0.000000      -5.789368       0.000000       0.214032       0.111000       0.118600       0.081800       0.042000
54047     54047     neimenggu      123.2833       44.1333           63       213     2012      03        03        063              0.000000      -7.503876       0.158338       0.196872       0.099000   -9999.000000       0.086100       0.106000
54047     54047     neimenggu      123.2833       44.1333           63       213     2012      03        04        064              0.000000      -4.279785       0.000000       0.214037       0.094000       0.159100       0.089600       0.064000
54047     54047     neimenggu      123.2833       44.1333           63       213     2012      03        05        065              0.000000      -2.391418       0.000000       0.232623   -9999.000000   -9999.000000       0.074800       0.072000
54047     54047     neimenggu      123.2833       44.1333           63       213     2012      03        06        066              0.000000      -1.114410       0.000000       0.248150   -9999.000000   -9999.000000       0.074900       0.028000
54047     54047     neimenggu      123.2833       44.1333           63       213     2012      03        07        067              0.000000      -5.810699       0.000000       0.208725       0.128000       0.116900       0.079200   -9999.000000
54047     54047     neimenggu      123.2833       44.1333           63       213     2012      03        08        068              0.000000      -4.648254       0.000000       0.214809   -9999.000000       0.018900       0.069000       0.176000
54047     54047     neimenggu      123.2833       44.1333           63       213     2012      03        09        069              0.000000      -6.356201       0.000000       0.208051   -9999.000000       0.149100       0.075800       0.190000
54047     54047     neimenggu      123.2833       44.1333           63       213     2012      03        10        070              0.000000      -6.754089       0.000000       0.199404   -9999.000000   -9999.000000   -9999.000000       0.065000
54047     54047     neimenggu      123.2833       44.1333           63       213     2012      03        11        071              0.000000      -6.532684       0.000000       0.195924   -9999.000000   -9999.000000       0.065700       0.157000
54047     54047     neimenggu      123.2833       44.1333           63       213     2012      03        12        072              0.000000      -6.563751       0.000000       0.199168       0.097000       0.172900       0.073700   -9999.000000
54047     54047     neimenggu      123.2833       44.1333           63       213     2012      03        13        073              0.000000      -5.050568       0.000000       0.212116       0.102000   -9999.000000       0.081800       0.244000
54047     54047     neimenggu      123.2833       44.1333           63       213     2012      03        14        074              0.000000      -2.035553       0.000000       0.243588       0.103000       0.179300       0.081500       0.203000
54047     54047     neimenggu      123.2833       44.1333           63       213     2012      03        15        075              0.000000      -1.390717       0.000000       0.246098       0.142000   -9999.000000       0.132900   -9999.000000
54047     54047     neimenggu      123.2833       44.1333           63       213     2012      03        16        076              0.000000       2.258636       0.000000       0.308770   -9999.000000       0.153600   -9999.000000       0.397000
54047     54047     neimenggu      123.2833       44.1333           63       213     2012      03        17        077              0.000000       2.772919       0.000000       0.302890   -9999.000000       0.331200       0.088100       0.034000
54047     54047     neimenggu      123.2833       44.1333           63       213     2012      03        18        078              0.000000      -7.154053       0.000000       0.203579       0.111000   -9999.000000       0.092100       0.087000
54047     54047     neimenggu      123.2833       44.1333           63       213     2012      03        19        079              0.000000      -3.238617       0.000000       0.217492       0.107000       0.103500       0.085800       0.100000
54047     54047     neimenggu      123.2833       44.1333           63       213     2012      03        20        080              0.000000      -1.535828       0.000000       0.248136       0.102000   -9999.000000       0.089700       0.068000
54047     54047     neimenggu      123.2833       44.1333           63       213     2012      03        21        081              0.000000      -0.176849       0.000000       0.255024   -9999.000000       0.058500       0.096600       0.156000
54047     54047     neimenggu      123.2833       44.1333           63       213     2012      03        22        082              0.000000       3.104156       0.000000       0.293528   -9999.000000   -9999.000000       0.092300       0.114000
54047     54047     neimenggu      123.2833       44.1333           63       213     2012      03        23        083              0.000000       3.409363       0.000000       0.293163       0.115000   -9999.000000       0.095700       0.166000
54047     54047     neimenggu      123.2833       44.1333           63       213     2012      03        24        084              0.000000       2.300293       0.000000       0.291147       0.132000       0.068500       0.119200       0.056000
54047     54047     neimenggu      123.2833       44.1333           63       213     2012      03        25        085              0.000000       0.756073       0.000000       0.273344       0.110000   -9999.000000       0.092000       0.165000
54047     54047     neimenggu      123.2833       44.1333           63       213     2012      03        26        086              0.000000       1.405243       0.000000       0.277984   -9999.000000       0.034000       0.101200       0.218000
54047     54047     neimenggu      123.2833       44.1333           63       213     2012      03        27        087              0.000000       5.550262       0.000000       0.317477   -9999.000000       0.253800   -9999.000000       0.187000
54047     54047     neimenggu      123.2833       44.1333           63       213     2012      03        28        088              0.000000       6.304260       0.000000       0.301105       0.118000   -9999.000000       0.094600   -9999.000000
54047     54047     neimenggu      123.2833       44.1333           63       213     2012      03        29        089              0.000000       7.957886       0.000000       0.317547       0.098000       0.077800       0.103800       0.122000
54047     54047     neimenggu      123.2833       44.1333           63       213     2012      03        30        090              0.000000       7.506287       1.222881       0.301989       0.103000       0.168700       0.101200       0.181000
54047     54047     neimenggu      123.2833       44.1333           63       213     2012      03        31        091              0.000000       3.016174       0.000000       0.290307       0.114000       0.051400       0.096700       0.160000
54047     54047     neimenggu      123.2833       44.1333           63       213     2012      04        01        092              0.000000       0.038727       0.000000       0.260133   -9999.000000       0.172100       0.100800       0.010000
54047     54047     neimenggu      123.2833       44.1333           63       213     2012      04        02        093              0.000000       0.957672       0.000000       0.264251       0.103000   -9999.000000   -9999.000000       0.060000
54047     54047     neimenggu      123.2833       44.1333           63       213     2012      04        03        094              0.000000       2.433685       0.000000       0.277143       0.098000       0.017400       0.093900       0.058000
54047     54047     neimenggu      123.2833       44.1333           63       213     2012      04        04        095              0.000000       4.146851       0.054920       0.292110       0.092000   -9999.000000       0.096300       0.071000
54047     54047     neimenggu      123.2833       44.1333           63       213     2012      04        05        096              0.000000       4.656708       0.275856       0.297237       0.102000       0.090000       0.092100   -9999.000000
54047     54047     neimenggu      123.2833       44.1333           63       213     2012      04        06        097              0.000000       2.685120       0.000000       0.278640   -9999.000000       0.037500       0.094700       0.011000
54047     54047     neimenggu      123.2833       44.1333           63       213     2012      04        07        098              0.000000       1.663910       0.016792       0.270084       0.105500   -9999.000000       0.100100       0.038000
54047     54047     neimenggu      123.2833       44.1333           63       213     2012      04        08        099              0.000000       6.875671       0.068836       0.305754       0.107000       0.197900       0.099400       0.013000
54047     54047     neimenggu      123.2833       44.1333           63       213     2012      04        09        100              0.000000       5.649658       0.000000       0.297691       0.099000   -9999.000000       0.098500       0.053000
54047     54047     neimenggu      123.2833       44.1333           63       213     2012      04        10        101              0.000000      11.072205       0.269557       0.302400       0.092000   -9999.000000       0.101600   -9999.000000
54047     54047     neimenggu      123.2833       44.1333           63       213     2012      04        11        102              0.000000       9.859741       0.000000       0.294201       0.100000       0.027800       0.098500       0.036000
54047     54047     neimenggu      123.2833       44.1333           63       213     2012      04        12        103              0.000000       9.764221       0.264375       0.295830       0.096000   -9999.000000       0.106300       0.048000
54047     54047     neimenggu      123.2833       44.1333           63       213     2012      04        13        104              0.000000       9.498779       0.337820       0.292612       0.102500   -9999.000000   -9999.000000   -9999.000000
54047     54047     neimenggu      123.2833       44.1333           63       213     2012      04        14        105              0.000000      13.780060       0.000000       0.284766       0.096000   -9999.000000       0.096600       0.082000
54047     54047     neimenggu      123.2833       44.1333           63       213     2012      04        15        106              0.000000      12.383423       0.000000       0.281754       0.090000   -9999.000000       0.093600       0.053000
54047     54047     neimenggu      123.2833       44.1333           63       213     2012      04        16        107              0.000000       9.120117       0.000000       0.276832       0.098500   -9999.000000       0.097700       0.008000
54047     54047     neimenggu      123.2833       44.1333           63       213     2012      04        17        108              0.000000       9.691284       0.000000       0.275786       0.094000       0.057200   -9999.000000       0.058000
54047     54047     neimenggu      123.2833       44.1333           63       213     2012      04        18        109              0.000000      14.099091       0.000000       0.270575       0.094500       0.033000       0.103100       0.106000
54047     54047     neimenggu      123.2833       44.1333           63       213     2012      04        19        110              0.000000      17.210968       0.000000       0.263126       0.094000       0.020300       0.097200       0.042000
54047     54047     neimenggu      123.2833       44.1333           63       213     2012      04        20        111              0.000000      16.715820       0.000000       0.258563       0.105000   -9999.000000   -9999.000000       0.098000
54047     54047     neimenggu      123.2833       44.1333           63       213     2012      04        21        112              0.000000      15.451996       0.000000       0.264202       0.105000       0.045600       0.096500       0.081000
54047     54047     neimenggu      123.2833       44.1333           63       213     2012      04        22        113              0.000000      15.111481       0.000000       0.264217       0.111000       0.258000       0.103000       0.060000
54047     54047     neimenggu      123.2833       44.1333           63       213     2012      04        23        114              0.000000      14.880310       0.000000       0.263790       0.100000       0.055600       0.106100       0.093000
54047     54047     neimenggu      123.2833       44.1333           63       213     2012      04        24        115              0.000000      18.859131      42.065384       0.260637       0.173000       0.108200       0.256900       0.645000
54047     54047     neimenggu      123.2833       44.1333           63       213     2012      04        25        116              0.000000      13.256287       0.445605       0.370801   -9999.000000   -9999.000000       0.268600       0.645000
54047     54047     neimenggu      123.2833       44.1333           63       213     2012      04        26        117              0.000000       8.017731       0.148698       0.376836       0.155500       0.444100       0.142700   -9999.000000
54047     54047     neimenggu      123.2833       44.1333           63       213     2012      04        27        118              0.000000      12.303772       0.000000       0.355255   -9999.000000       0.221600       0.127800       0.272000
54047     54047     neimenggu      123.2833       44.1333           63       213     2012      04        28        119              0.000000      11.034576       0.000000       0.345821       0.115000   -9999.000000       0.112000       0.211000
54047     54047     neimenggu      123.2833       44.1333           63       213     2012      04        29        120              0.000000       9.580200       0.000000       0.336827       0.109500       0.199300       0.120400       0.182000
54047     54047     neimenggu      123.2833       44.1333           63       213     2012      04        30        121              0.000000      13.570862       0.458643       0.330938       0.080000       0.230400   -9999.000000       0.225000
54047     54047     neimenggu      123.2833       44.1333           63       213     2012      05        01        122              0.000000      14.506897       0.247950       0.329641       0.096500       0.114800       0.089700       0.140000
54047     54047     neimenggu      123.2833       44.1333           63       213     2012      05        02        123              0.000000      14.654816       0.066310       0.322227       0.105000       0.289800       0.092600       0.157000
54047     54047     neimenggu      123.2833       44.1333           63       213     2012      05        03        124              0.000000      13.954773       0.108810       0.320582       0.096000   -9999.000000       0.088800       0.222000
54047     54047     neimenggu      123.2833       44.1333           63       213     2012      05        04        125              0.000000      18.765167       0.000000       0.311411       0.095000       0.152700       0.088500   -9999.000000
54047     54047     neimenggu      123.2833       44.1333           63       213     2012      05        05        126              0.000000      17.102539       0.000000       0.302782       0.080000       0.159000       0.094200       0.200000
54047     54047     neimenggu      123.2833       44.1333           63       213     2012      05        06        127              0.000000      14.735199       0.000000       0.298750       0.086500       0.103200       0.080200       0.167000
54047     54047     neimenggu      123.2833       44.1333           63       213     2012      05        07        128              0.000000      16.423676       0.000000       0.291958   -9999.000000       0.298900       0.078400       0.148000
54047     54047     neimenggu      123.2833       44.1333           63       213     2012      05        08        129              0.000000      17.955322       0.000000       0.287004       0.095000   -9999.000000       0.081500       0.189000
54047     54047     neimenggu      123.2833       44.1333           63       213     2012      05        09        130              0.000000      17.499603       0.000000       0.282940       0.085500       0.079300       0.082700   -9999.000000
54047     54047     neimenggu      123.2833       44.1333           63       213     2012      05        10        131              0.000000      18.299713       0.000000       0.276725       0.079000       0.272500       0.088000       0.228000
54047     54047     neimenggu      123.2833       44.1333           63       213     2012      05        11        132              0.000000      18.439240       0.000000       0.270893       0.091500       0.177900       0.083900       0.218000
54047     54047     neimenggu      123.2833       44.1333           63       213     2012      05        12        133              0.191000      18.451294       2.731154       0.267159       0.111000       0.109200       0.179800   -9999.000000
54047     54047     neimenggu      123.2833       44.1333           63       213     2012      05        13        134              0.000000      14.044342       5.266562       0.299000   -9999.000000       0.379400       0.124800       0.377000
54047     54047     neimenggu      123.2833       44.1333           63       213     2012      05        14        135              0.000000      15.222412       0.078090       0.322109       0.130000       0.369900       0.110500       0.220000
54047     54047     neimenggu      123.2833       44.1333           63       213     2012      05        15        136              0.000000      14.302948       0.000000       0.311327       0.098000       0.238700       0.097400       0.347000
54047     54047     neimenggu      123.2833       44.1333           63       213     2012      05        16        137              0.000000      15.345093       0.310066       0.299770       0.124000       0.242400       0.134200       0.209000
54047     54047     neimenggu      123.2833       44.1333           63       213     2012      05        17        138              0.000000      14.522247       0.000000       0.297244       0.105000       0.215000   -9999.000000       0.280000
54047     54047     neimenggu      123.2833       44.1333           63       213     2012      05        18        139              0.000000      18.022949       0.000000       0.287291       0.100000   -9999.000000       0.082900       0.249000
54047     54047     neimenggu      123.2833       44.1333           63       213     2012      05        19        140              0.000000      21.363312       0.000000       0.274485       0.092000       0.049200       0.080600       0.229000
54047     54047     neimenggu      123.2833       44.1333           63       213     2012      05        20        141              0.000000      19.982483       0.000000       0.263118       0.098000   -9999.000000       0.082900       0.266000
54047     54047     neimenggu      123.2833       44.1333           63       213     2012      05        21        142              0.000000      23.246124       0.000000       0.253202       0.081000   -9999.000000       0.086300       0.233000
54047     54047     neimenggu      123.2833       44.1333           63       213     2012      05        22        143              0.000000      25.193146       1.588990       0.242678       0.132500       0.087000       0.140600       0.551000
54047     54047     neimenggu      123.2833       44.1333           63       213     2012      05        23        144              0.000000      19.715485       0.000000       0.264916   -9999.000000   -9999.000000       0.081300       0.172000
54047     54047     neimenggu      123.2833       44.1333           63       213     2012      05        24        145              0.000000      18.676361       0.342413       0.254557   -9999.000000       0.038900       0.080200       0.234000
54047     54047     neimenggu      123.2833       44.1333           63       213     2012      05        25        146              0.000000      17.931427       0.000000       0.247675       0.094000       0.108900       0.082900   -9999.000000
54047     54047     neimenggu      123.2833       44.1333           63       213     2012      05        26        147              0.000000      19.249634       0.000000       0.242021       0.079000   -9999.000000       0.088800       0.168000
54047     54047     neimenggu      123.2833       44.1333           63       213     2012      05        27        148              0.000000      17.798553       0.000000       0.243332       0.089500       0.143300       0.090800       0.218000
54047     54047     neimenggu      123.2833       44.1333           63       213     2012      05        28        149              0.000000      22.031860       0.000000       0.237715       0.099000       0.101700       0.091800       0.171000
54047     54047     neimenggu      123.2833       44.1333           63       213     2012      05        29        150              0.000000      24.145203       5.193438       0.232354       0.111000       0.166100       0.082800       0.706000
54047     54047     neimenggu      123.2833       44.1333           63       213     2012      05        30        151              0.000000      23.502991       5.703007       0.274382   -9999.000000       0.216600       0.193600   -9999.000000
54047     54047     neimenggu      123.2833       44.1333           63       213     2012      05        31        152              0.000000      16.969177       0.113525       0.323813       0.085000       0.109000       0.085900   -9999.000000
54047     54047     neimenggu      123.2833       44.1333           63       213     2012      06        01        153              0.000000      19.931152       2.352089       0.295053       0.085000       0.250300       0.141400       0.219000
54047     54047     neimenggu      123.2833       44.1333           63       213     2012      06        02        154              0.000000      20.667542       4.507453       0.285428       0.215500       0.423900       0.151500   -9999.000000
54047     54047     neimenggu      123.2833       44.1333           63       213     2012      06        03        155              0.000000      18.224731       0.856218       0.322286       0.187000   -9999.000000   -9999.000000       0.301000
54047     54047     neimenggu      123.2833       44.1333           63       213     2012      06        04        156              0.000000      19.891022      10.022829       0.311261   -9999.000000       0.150600       0.167000       0.651000
54047     54047     neimenggu      123.2833       44.1333           63       213     2012      06        05        157              0.000000      18.051605       0.078867       0.352496       0.159000       0.373900       0.095400       0.560000
54047     54047     neimenggu      123.2833       44.1333           63       213     2012      06        06        158              0.000000      21.830719       8.716070       0.328278       0.101000       0.176900       0.207100       0.887000
54047     54047     neimenggu      123.2833       44.1333           63       213     2012      06        07        159              0.000000      23.615509       0.000000       0.352013       0.135500       0.181400       0.128200   -9999.000000
54047     54047     neimenggu      123.2833       44.1333           63       213     2012      06        08        160              0.000000      23.837158       0.000000       0.329132       0.141000   -9999.000000       0.094200       0.399000
54047     54047     neimenggu      123.2833       44.1333           63       213     2012      06        09        161              0.000000      24.086304      13.708817       0.313975   -9999.000000       0.197400       0.070800       0.302000
54047     54047     neimenggu      123.2833       44.1333           63       213     2012      06        10        162              0.000000      23.514801       0.100782       0.348452       0.136500       0.543200       0.089500   -9999.000000
54047     54047     neimenggu      123.2833       44.1333           63       213     2012      06        11        163              0.000000      20.255920       7.959091       0.336666       0.101000       0.193900       0.109000       0.489000
54047     54047     neimenggu      123.2833       44.1333           63       213     2012      06        12        164              0.000000      18.584839       0.856622       0.341766       0.226000       0.288300       0.180200       0.556000
54047     54047     neimenggu      123.2833       44.1333           63       213     2012      06        13        165              0.000000      18.042786       0.060950       0.350965       0.188000       0.155200       0.125300       0.460000
54047     54047     neimenggu      123.2833       44.1333           63       213     2012      06        14        166              0.000000      20.185455      13.891968       0.335094   -9999.000000       0.212600   -9999.000000       0.384000
54047     54047     neimenggu      123.2833       44.1333           63       213     2012      06        15        167              0.000000      19.941833      11.955160       0.363422       0.312000   -9999.000000       0.139400       0.921000
54047     54047     neimenggu      123.2833       44.1333           63       213     2012      06        16        168              0.000000      20.025360       6.050039       0.378456       0.298000       0.280000       0.177100       0.635000
54047     54047     neimenggu      123.2833       44.1333           63       213     2012      06        17        169              0.000000      20.855560       9.149035       0.374200       0.235000       0.410200       0.197300       0.754000
54047     54047     neimenggu      123.2833       44.1333           63       213     2012      06        18        170              0.000000      20.684296       0.425969       0.385042       0.233000       0.259900       0.127300       0.596000
54047     54047     neimenggu      123.2833       44.1333           63       213     2012      06        19        171              0.000000      23.267700       0.000000       0.365321       0.186000       0.386500       0.101000       0.549000
54047     54047     neimenggu      123.2833       44.1333           63       213     2012      06        20        172              0.000000      24.995789       0.000000       0.352357       0.135000       0.168900   -9999.000000       0.455000
54047     54047     neimenggu      123.2833       44.1333           63       213     2012      06        21        173              0.000000      26.088989       2.420249       0.342016       0.112000   -9999.000000       0.062700       0.620000
54047     54047     neimenggu      123.2833       44.1333           63       213     2012      06        22        174              0.000000      26.055847       1.163981       0.341779       0.121000       0.228000       0.084700       0.788000
54047     54047     neimenggu      123.2833       44.1333           63       213     2012      06        23        175              0.000000      25.446472       0.000000       0.338353       0.175500   -9999.000000       0.084000   -9999.000000
54047     54047     neimenggu      123.2833       44.1333           63       213     2012      06        24        176              0.000000      23.671448       0.000000       0.335241       0.150000       0.332900       0.071700       0.506000
54047     54047     neimenggu      123.2833       44.1333           63       213     2012      06        25        177              0.000000      24.996521       0.210674       0.328348       0.130500       0.186600       0.083200       0.491000
54047     54047     neimenggu      123.2833       44.1333           63       213     2012      06        26        178              0.000000      26.664001       0.548540       0.317256       0.121000   -9999.000000       0.080500       0.423000
54047     54047     neimenggu      123.2833       44.1333           63       213     2012      06        27        179              0.000000      26.225098       0.070396       0.314964       0.100000       0.270300       0.067700       0.563000
54047     54047     neimenggu      123.2833       44.1333           63       213     2012      06        28        180              0.000000      27.637787       0.294287       0.303801       0.107500       0.192000       0.066100       0.366000
54047     54047     neimenggu      123.2833       44.1333           63       213     2012      06        29        181              0.000000      25.334045       5.097296       0.297724       0.189000       0.081100       0.103600       0.646000
54047     54047     neimenggu      123.2833       44.1333           63       213     2012      06        30        182              0.000000      22.109283       0.000000       0.333017       0.134000       0.165700       0.074300   -9999.000000
54047     54047     neimenggu      123.2833       44.1333           63       213     2012      07        01        183              0.000000      26.978241      13.322266       0.308323       0.164000       0.211300   -9999.000000   -9999.000000
54047     54047     neimenggu      123.2833       44.1333           63       213     2012      07        02        184              0.000000      23.118195      11.272458       0.352080       0.143000       0.395600       0.112900       0.864000
54047     54047     neimenggu      123.2833       44.1333           63       213     2012      07        03        185              0.000000      23.421417       2.360759       0.356725       0.304000       0.469400       0.160200       0.975000
54047     54047     neimenggu      123.2833       44.1333           63       213     2012      07        04        186              0.000000      21.521912       0.139649       0.365613       0.235000       0.537800       0.127200       0.796000
54047     54047     neimenggu      123.2833       44.1333           63       213     2012      07        05        187              0.000000      24.809631       0.000000       0.349281   -9999.000000       0.205800       0.102500       0.709000
54047     54047     neimenggu      123.2833       44.1333           63       213     2012      07        06        188              0.000000      27.253265       0.490884       0.336414   -9999.000000       0.050300       0.096100   -9999.000000
54047     54047     neimenggu      123.2833       44.1333           63       213     2012      07        07        189              0.000000      27.782562       0.000000       0.325228   -9999.000000       0.331400       0.069400       0.613000
54047     54047     neimenggu      123.2833       44.1333           63       213     2012      07        08        190              0.000000      28.384857       0.029508       0.314963       0.132000       0.208000       0.066400       0.524000
54047     54047     neimenggu      123.2833       44.1333           63       213     2012      07        09        191              0.000000      27.458649       3.512283       0.309096       0.151000       0.373400       0.103700   -9999.000000
54047     54047     neimenggu      123.2833       44.1333           63       213     2012      07        10        192              0.000000      26.774231      17.712616       0.328946   -9999.000000       0.150300       0.170000       0.640000
54047     54047     neimenggu      123.2833       44.1333           63       213     2012      07        11        193              0.000000      23.853241      16.541334       0.339749       0.397000   -9999.000000       0.218800       1.000000
54047     54047     neimenggu      123.2833       44.1333           63       213     2012      07        12        194              0.000000      21.115509       0.084535       0.395193       0.391000       0.417100       0.204400       1.000000
54047     54047     neimenggu      123.2833       44.1333           63       213     2012      07        13        195              0.000000      21.915955       0.000000       0.373545       0.200000       0.409900       0.139200       0.911000
54047     54047     neimenggu      123.2833       44.1333           63       213     2012      07        14        196              0.000000      23.731873       0.000000       0.356705       0.191000   -9999.000000       0.116000       0.696000
54047     54047     neimenggu      123.2833       44.1333           63       213     2012      07        15        197              0.000000      25.228058       0.000000       0.345794   -9999.000000       0.210600       0.106900       0.766000
54047     54047     neimenggu      123.2833       44.1333           63       213     2012      07        16        198              0.000000      26.487915       0.000000       0.336240       0.182000   -9999.000000       0.105400       0.702000
54047     54047     neimenggu      123.2833       44.1333           63       213     2012      07        17        199              0.000000      27.244446       0.000000       0.326821       0.161000       0.085500       0.106700       0.516000
54047     54047     neimenggu      123.2833       44.1333           63       213     2012      07        18        200              0.000000      27.978699       0.043038       0.317638       0.139000       0.101700   -9999.000000       0.641000
54047     54047     neimenggu      123.2833       44.1333           63       213     2012      07        19        201              0.000000      26.353333       0.233497       0.317041       0.153500   -9999.000000       0.093000       0.588000
54047     54047     neimenggu      123.2833       44.1333           63       213     2012      07        20        202              0.219313      28.101410       5.843044       0.312518       0.159500       0.057200       0.096400       0.745000
54047     54047     neimenggu      123.2833       44.1333           63       213     2012      07        21        203              0.215042      28.666840       9.404531       0.330221       0.235000   -9999.000000       0.119700       0.731000
54047     54047     neimenggu      123.2833       44.1333           63       213     2012      07        22        204              0.256250      26.849030      47.440067       0.346034       0.387000       0.169900       0.176500   -9999.000000
54047     54047     neimenggu      123.2833       44.1333           63       213     2012      07        23        205              0.263958      23.346344       0.000000       0.412311       0.260000   -9999.000000       0.237000       0.978000
54047     54047     neimenggu      123.2833       44.1333           63       213     2012      07        24        206              0.251875      24.714447       0.000000       0.386866       0.229000       0.266900       0.197100       0.898000
54047     54047     neimenggu      123.2833       44.1333           63       213     2012      07        25        207              0.246042      25.484894       0.039260       0.373872       0.241000       0.358000       0.170900       0.913000
54047     54047     neimenggu      123.2833       44.1333           63       213     2012      07        26        208              0.239458      27.591003       4.438257       0.364386       0.280000       0.407100       0.155200       0.815000
54047     54047     neimenggu      123.2833       44.1333           63       213     2012      07        27        209              0.236208      26.429077       0.000000       0.366567       0.237000       0.284100       0.160200       0.726000
54047     54047     neimenggu      123.2833       44.1333           63       213     2012      07        28        210              0.237125      26.590698      13.764646       0.355771       0.312000       0.184200       0.240700       0.773000
54047     54047     neimenggu      123.2833       44.1333           63       213     2012      07        29        211              0.253875      25.522614       2.972990       0.386196       0.270000   -9999.000000       0.243100       1.000000
54047     54047     neimenggu      123.2833       44.1333           63       213     2012      07        30        212              0.251708      23.873840       0.336628       0.376291       0.282500       0.286400       0.193600   -9999.000000
54047     54047     neimenggu      123.2833       44.1333           63       213     2012      07        31        213              0.243667      21.484375       0.000000       0.367261       0.271500       0.468000       0.150600       0.792000
54047     54047     neimenggu      123.2833       44.1333           63       213     2012      08        01        214              0.236833      23.473969       3.258985       0.358612   -9999.000000   -9999.000000       0.175700       0.789000
54047     54047     neimenggu      123.2833       44.1333           63       213     2012      08        02        215              0.249792      23.567078       3.545788       0.355277       0.336000       0.259200       0.178600       0.895000
54047     54047     neimenggu      123.2833       44.1333           63       213     2012      08        03        216              0.243792      21.446106       0.115886       0.370439       0.230000       0.372800       0.167400       0.773000
54047     54047     neimenggu      123.2833       44.1333           63       213     2012      08        04        217              0.238625      24.419708       0.333605       0.357282       0.224000       0.217200   -9999.000000   -9999.000000
54047     54047     neimenggu      123.2833       44.1333           63       213     2012      08        05        218              0.236958      24.968170       0.000000       0.353225       0.289000       0.285100       0.132800       0.705000
54047     54047     neimenggu      123.2833       44.1333           63       213     2012      08        06        219              0.231250      26.760498       0.000000       0.344292       0.301000   -9999.000000       0.184600       0.689000
54047     54047     neimenggu      123.2833       44.1333           63       213     2012      08        07        220              0.225375      27.303375       0.000000       0.336757       0.272500       0.123200       0.180500   -9999.000000
54047     54047     neimenggu      123.2833       44.1333           63       213     2012      08        08        221              0.220292      27.766144       3.181987       0.329191       0.316000       0.252600       0.217900       0.800000
54047     54047     neimenggu      123.2833       44.1333           63       213     2012      08        09        222              0.222208      24.811798       0.000000       0.343692       0.164000       0.213200       0.205400       0.789000
54047     54047     neimenggu      123.2833       44.1333           63       213     2012      08        10        223              0.216042      24.614380      11.251834       0.329870       0.367000       0.055100       0.233800       0.788000
54047     54047     neimenggu      123.2833       44.1333           63       213     2012      08        11        224              0.209625      22.269287       0.992004       0.375020       0.370000       0.222300       0.231000       0.883000
54047     54047     neimenggu      123.2833       44.1333           63       213     2012      08        12        225              0.212792      19.860138       0.000000       0.354920       0.351000       0.395800       0.197600       0.717000
54047     54047     neimenggu      123.2833       44.1333           63       213     2012      08        13        226              0.210087      21.730469       0.000000       0.343809       0.293000   -9999.000000       0.191900       0.721000
54047     54047     neimenggu      123.2833       44.1333           63       213     2012      08        14        227              0.204333      22.590027       0.082693       0.334720       0.237000       0.134000       0.203100       0.711000
54047     54047     neimenggu      123.2833       44.1333           63       213     2012      08        15        228              0.203625      22.955566       0.047157       0.331394       0.278000   -9999.000000       0.207600       0.591000
54047     54047     neimenggu      123.2833       44.1333           63       213     2012      08        16        229              0.200958      23.816681       0.000000       0.324954       0.285000   -9999.000000       0.171100       0.767000
54047     54047     neimenggu      123.2833       44.1333           63       213     2012      08        17        230              0.194708      24.395294       0.000000       0.317870       0.281000       0.179600       0.172800       0.636000
54047     54047     neimenggu      123.2833       44.1333           63       213     2012      08        18        231              0.193833      24.168030       0.524312       0.313477       0.267000       0.130200       0.188000       0.725000
54047     54047     neimenggu      123.2833       44.1333           63       213     2012      08        19        232              0.190250      25.213959       0.000000       0.309524       0.223000   -9999.000000       0.188300       0.698000
54047     54047     neimenggu      123.2833       44.1333           63       213     2012      08        20        233              0.185000      25.152130       0.168102       0.303310       0.231000       0.157800       0.171500   -9999.000000
54047     54047     neimenggu      123.2833       44.1333           63       213     2012      08        21        234              0.166167      22.242462       0.307870       0.296718       0.241000   -9999.000000   -9999.000000       0.684000
54047     54047     neimenggu      123.2833       44.1333           63       213     2012      08        22        235              0.158375      20.188538       0.000000       0.291749       0.267000       0.116400       0.151000   -9999.000000
54047     54047     neimenggu      123.2833       44.1333           63       213     2012      08        23        236              0.156917      19.636444       0.842486       0.288520       0.263000       0.151100       0.159600       0.596000
54047     54047     neimenggu      123.2833       44.1333           63       213     2012      08        24        237              0.155667      21.857452       0.000000       0.284600       0.266500   -9999.000000       0.167700   -9999.000000
54047     54047     neimenggu      123.2833       44.1333           63       213     2012      08        25        238              0.000000      23.473419       0.000000       0.282387       0.232000   -9999.000000       0.171200   -9999.000000
54047     54047     neimenggu      123.2833       44.1333           63       213     2012      08        26        239              0.149625      24.211639       0.000000       0.274052       0.240000       0.162300       0.182100       0.735000
54047     54047     neimenggu      123.2833       44.1333           63       213     2012      08        27        240              0.147792      24.066925       0.000000       0.271509       0.262500       0.101300       0.139200       0.608000
54047     54047     neimenggu      123.2833       44.1333           63       213     2012      08        28        241              0.147417      23.633850       4.627428       0.269480   -9999.000000       0.222300       0.144600   -9999.000000
54047     54047     neimenggu      123.2833       44.1333           63       213     2012      08        29        242              0.150042      24.086365       0.000000       0.295567       0.275000       0.098400       0.149800       0.581000
54047     54047     neimenggu      123.2833       44.1333           63       213     2012      08        30        243              0.155542      22.565765       0.545687       0.295791       0.219000       0.080500       0.156300       0.556000
54047     54047     neimenggu      123.2833       44.1333           63       213     2012      08        31        244              0.153083      25.849304       0.000000       0.283299       0.198000   -9999.000000       0.163900       0.710000
54047     54047     neimenggu      123.2833       44.1333           63       213     2012      09        01        245              0.153792      26.753510       0.000000       0.278386       0.257000       0.097800   -9999.000000       0.632000
54047     54047     neimenggu      123.2833       44.1333           63       213     2012      09        02        246              0.176125      27.980652      17.301704       0.267561       0.418000       0.196100       0.177700   -9999.000000
54047     54047     neimenggu      123.2833       44.1333           63       213     2012      09        03        247              0.239292      19.871521       9.245571       0.326170       0.423000       0.259600       0.210500       0.961000
54047     54047     neimenggu      123.2833       44.1333           63       213     2012      09        04        248              0.238583      15.717041       0.043423       0.367286       0.427000       0.246600       0.191300       0.895000
54047     54047     neimenggu      123.2833       44.1333           63       213     2012      09        05        249              0.228625      16.296051       0.146825       0.349560       0.254000       0.252500       0.176500   -9999.000000
54047     54047     neimenggu      123.2833       44.1333           63       213     2012      09        06        250              0.222375      18.816162       0.049578       0.335897       0.255000   -9999.000000       0.170900       0.641000
54047     54047     neimenggu      123.2833       44.1333           63       213     2012      09        07        251              0.217333      20.461975       0.000000       0.326751       0.290000       0.171600       0.154500       0.664000
54047     54047     neimenggu      123.2833       44.1333           63       213     2012      09        08        252              0.210667      21.553741       0.383162       0.323258       0.285000       0.184400       0.148300       0.597000
54047     54047     neimenggu      123.2833       44.1333           63       213     2012      09        09        253              0.208417      20.587250       0.000000       0.320242       0.264500       0.123900       0.152600       0.620000
54047     54047     neimenggu      123.2833       44.1333           63       213     2012      09        10        254              0.205833      21.717560       0.000000       0.313177       0.225000       0.193800       0.158600       0.534000
54047     54047     neimenggu      123.2833       44.1333           63       213     2012      09        11        255              0.199000      23.175964      32.651745       0.306217       0.174000   -9999.000000       0.223500       0.557000
54047     54047     neimenggu      123.2833       44.1333           63       213     2012      09        12        256              0.238125      21.987640       7.804803       0.340105   -9999.000000       0.356700       0.266200       0.826000
54047     54047     neimenggu      123.2833       44.1333           63       213     2012      09        13        257              0.225292      14.390839       0.000000       0.392479   -9999.000000       0.355100       0.248400       0.925000
54047     54047     neimenggu      123.2833       44.1333           63       213     2012      09        14        258              0.217750      15.255798       0.000000       0.368374       0.288000       0.264000       0.215800       0.789000
54047     54047     neimenggu      123.2833       44.1333           63       213     2012      09        15        259              0.212500      16.654663       0.000000       0.358363   -9999.000000       0.236500       0.210500       0.750000
54047     54047     neimenggu      123.2833       44.1333           63       213     2012      09        16        260              0.206500      17.462189       0.091591       0.351484       0.203000       0.144000       0.179300       0.636000
54047     54047     neimenggu      123.2833       44.1333           63       213     2012      09        17        261              0.200958      18.017761       0.000000       0.346235       0.221000       0.204700       0.147900       0.560000
54047     54047     neimenggu      123.2833       44.1333           63       213     2012      09        18        262              0.196625      17.752258       0.000000       0.341373       0.232000       0.461900   -9999.000000   -9999.000000
54047     54047     neimenggu      123.2833       44.1333           63       213     2012      09        19        263              0.193917      17.620392       0.000000       0.337115       0.225000       0.334400       0.129700       0.553000
54047     54047     neimenggu      123.2833       44.1333           63       213     2012      09        20        264              0.192250      18.411743       0.000000       0.333736       0.227500       0.215400       0.133200       0.520000
54047     54047     neimenggu      123.2833       44.1333           63       213     2012      09        21        265              0.189542      19.995850       1.945575       0.331098   -9999.000000   -9999.000000       0.138500       0.515000
54047     54047     neimenggu      123.2833       44.1333           63       213     2012      09        22        266              0.205000      20.743652      20.108566       0.327525       0.191500       0.216700       0.201000       0.580000
54047     54047     neimenggu      123.2833       44.1333           63       213     2012      09        23        267              0.226875      20.395050       0.147126       0.366247       0.240500       0.359600       0.194000       0.955000
54047     54047     neimenggu      123.2833       44.1333           63       213     2012      09        24        268              0.215583      17.905396       0.000000       0.366076       0.219000   -9999.000000       0.152100       0.745000
54047     54047     neimenggu      123.2833       44.1333           63       213     2012      09        25        269              0.209500      16.888855       3.231957       0.353738       0.210500       0.329900       0.142600       0.759000
54047     54047     neimenggu      123.2833       44.1333           63       213     2012      09        26        270              0.209250      17.120728       1.008260       0.358222       0.196000       0.258900       0.149200   -9999.000000
54047     54047     neimenggu      123.2833       44.1333           63       213     2012      09        27        271              0.215143      16.459961      37.794228       0.352248       0.199000       0.227100       0.218700       0.951000
54047     54047     neimenggu      123.2833       44.1333           63       213     2012      09        28        272              0.246733      15.524719      37.216454       0.394722   -9999.000000   -9999.000000       0.260500       0.944000
54047     54047     neimenggu      123.2833       44.1333           63       213     2012      09        29        273              0.234750      12.851013       0.210651       0.430052   -9999.000000   -9999.000000       0.222600       0.792000
54047     54047     neimenggu      123.2833       44.1333           63       213     2012      09        30        274              0.225625      10.756378       0.000000       0.403012       0.338000   -9999.000000       0.200200       0.823000
54047     54047     neimenggu      123.2833       44.1333           63       213     2012      10        01        275              0.220792      12.439636       0.000000       0.390466       0.235000   -9999.000000       0.172900   -9999.000000
54047     54047     neimenggu      123.2833       44.1333           63       213     2012      10        02        276              0.267167      14.351166       0.062035       0.383941       0.181000       0.228400       0.176400       0.797000
54047     54047     neimenggu      123.2833       44.1333           63       213     2012      10        03        277              0.272333      15.052490       0.083685       0.378927       0.182000       0.227100       0.146900       0.719000
54047     54047     neimenggu      123.2833       44.1333           63       213     2012      10        04        278              0.267000      13.928406       0.000000       0.375632       0.211000   -9999.000000       0.162100   -9999.000000
54047     54047     neimenggu      123.2833       44.1333           63       213     2012      10        05        279              0.261750      13.938507       0.000000       0.372145   -9999.000000       0.243000   -9999.000000       0.613000
54047     54047     neimenggu      123.2833       44.1333           63       213     2012      10        06        280              0.258500      12.026703       0.000000       0.368047       0.177000       0.270100       0.139100       0.547000
54047     54047     neimenggu      123.2833       44.1333           63       213     2012      10        07        281              0.257083      12.304230       0.000000       0.365735       0.165000       0.210700       0.138700       0.577000
54047     54047     neimenggu      123.2833       44.1333           63       213     2012      10        08        282              0.256083      14.026581       0.000000       0.363631       0.173500       0.206000       0.127300       0.530000
54047     54047     neimenggu      123.2833       44.1333           63       213     2012      10        09        283              0.284125      15.959778      19.697906       0.361695       0.216000       0.266700       0.180600       0.994000
54047     54047     neimenggu      123.2833       44.1333           63       213     2012      10        10        284              0.283083      12.092865       0.000000       0.396819   -9999.000000       0.673400       0.175600       0.806000
54047     54047     neimenggu      123.2833       44.1333           63       213     2012      10        11        285              0.276167       9.104187       0.173440       0.381528   -9999.000000       0.482400       0.173100       0.783000
54047     54047     neimenggu      123.2833       44.1333           63       213     2012      10        12        286              0.273583      10.521851       3.903969       0.375001       0.164000   -9999.000000       0.156400       0.773000
54047     54047     neimenggu      123.2833       44.1333           63       213     2012      10        13        287              0.272583      10.928802       0.448088       0.376030   -9999.000000       0.442700       0.171500       0.772000
54047     54047     neimenggu      123.2833       44.1333           63       213     2012      10        14        288              0.261917       8.093475       0.278396       0.374344   -9999.000000       0.381700       0.143800       0.662000
54047     54047     neimenggu      123.2833       44.1333           63       213     2012      10        15        289              0.259250       7.268951       0.310085       0.369404   -9999.000000       0.270200       0.140100       0.652000
54047     54047     neimenggu      123.2833       44.1333           63       213     2012      10        16        290              0.284708       8.105255      13.417230       0.368083   -9999.000000       0.324800       0.159500       0.971000
54047     54047     neimenggu      123.2833       44.1333           63       213     2012      10        17        291              0.281667       6.376953       0.680939       0.393925   -9999.000000   -9999.000000       0.178700   -9999.000000
54047     54047     neimenggu      123.2833       44.1333           63       213     2012      10        18        292              0.272083       4.701508       0.328196       0.379801   -9999.000000       0.354500       0.155300       0.698000
54047     54047     neimenggu      123.2833       44.1333           63       213     2012      10        19        293              0.271167       3.881195       1.189000       0.359858   -9999.000000       0.387600       0.148400       0.773000
54047     54047     neimenggu      123.2833       44.1333           63       213     2012      10        20        294              0.262583       5.689911       0.000000       0.374162   -9999.000000   -9999.000000       0.109800       0.780000
54047     54047     neimenggu      123.2833       44.1333           63       213     2012      10        21        295              0.260083       3.505188       0.542669       0.355447   -9999.000000       0.241700       0.127500       0.594000
54047     54047     neimenggu      123.2833       44.1333           63       213     2012      10        22        296              0.258917       3.135223       0.189425       0.366737   -9999.000000       0.168800   -9999.000000       0.661000
54047     54047     neimenggu      123.2833       44.1333           63       213     2012      10        23        297              0.258500       3.436523       0.000000       0.356262   -9999.000000       0.143600       0.122000       0.450000
54047     54047     neimenggu      123.2833       44.1333           63       213     2012      10        24        298              0.258917       5.008514       0.000000       0.366098   -9999.000000       0.163200       0.126900       0.525000
54047     54047     neimenggu      123.2833       44.1333           63       213     2012      10        25        299              0.000000       6.332977       1.546562       0.365431   -9999.000000       0.194900       0.113400   -9999.000000
54047     54047     neimenggu      123.2833       44.1333           63       213     2012      10        26        300              0.260250       7.359375       0.000000       0.364288       0.150000       0.340400       0.116500       0.524000
54047     54047     neimenggu      123.2833       44.1333           63       213     2012      10        27        301              0.267000      11.173676       0.000000       0.363409       0.154000       0.403200       0.146700       0.456000
54047     54047     neimenggu      123.2833       44.1333           63       213     2012      10        28        302              0.000000       8.888611       0.000000       0.361780       0.169000       0.549900       0.130200       0.585000
54047     54047     neimenggu      123.2833       44.1333           63       213     2012      10        29        303              0.254500       3.189911       0.000000       0.331890   -9999.000000   -9999.000000       0.114100       0.394000
54047     54047     neimenggu      123.2833       44.1333           63       213     2012      10        30        304              0.252750       0.520020       0.000000       0.299808   -9999.000000       0.261200       0.117000   -9999.000000
54047     54047     neimenggu      123.2833       44.1333           63       213     2012      10        31        305              0.251292      -0.654449       0.000000       0.274378   -9999.000000       0.147000       0.085600       0.421000
54047     54047     neimenggu      123.2833       44.1333           63       213     2012      11        01        306              0.247417      -1.557220       0.000000       0.237910   -9999.000000       0.126000       0.095200       0.442000
54047     54047     neimenggu      123.2833       44.1333           63       213     2012      11        02        307              0.248500      -0.665253       0.000000       0.261408   -9999.000000   -9999.000000   -9999.000000   -9999.000000
54047     54047     neimenggu      123.2833       44.1333           63       213     2012      11        03        308              0.250667       0.382538       0.000000       0.279556   -9999.000000       0.183200       0.109000       0.461000
54047     54047     neimenggu      123.2833       44.1333           63       213     2012      11        04        309              0.248500       0.727356       0.000000       0.297995   -9999.000000   -9999.000000       0.111200       0.461000
54047     54047     neimenggu      123.2833       44.1333           63       213     2012      11        05        310              0.245583       1.116302       0.000000       0.313131   -9999.000000   -9999.000000       0.085700       0.372000
54047     54047     neimenggu      123.2833       44.1333           63       213     2012      11        06        311              0.241417       0.439911       0.000000       0.294553   -9999.000000       0.533100       0.082600       0.295000
54047     54047     neimenggu      123.2833       44.1333           63       213     2012      11        07        312              0.240292      -0.194305       0.000000       0.279065       0.134000       0.100300       0.090100       0.293000
54047     54047     neimenggu      123.2833       44.1333           63       213     2012      11        08        313              0.238750       0.421204       0.000000       0.282903       0.124000       0.166900   -9999.000000       0.297000
54047     54047     neimenggu      123.2833       44.1333           63       213     2012      11        09        314              0.238792       0.539764       0.000000       0.289434       0.109000       0.160000       0.087400       0.350000
54047     54047     neimenggu      123.2833       44.1333           63       213     2012      11        10        315              0.240958       0.931641       0.033011       0.297857       0.111000       0.207500       0.095400       0.327000
54047     54047     neimenggu      123.2833       44.1333           63       213     2012      11        11        316              0.275833       1.491821       2.194244       0.316119   -9999.000000   -9999.000000       0.086400       0.720000
54047     54047     neimenggu      123.2833       44.1333           63       213     2012      11        12        317              0.278500       0.870331       0.000000       0.323669   -9999.000000   -9999.000000       0.069300       0.606000
54047     54047     neimenggu      123.2833       44.1333           63       213     2012      11        13        318              0.000000      -0.470184       0.000000       0.283341   -9999.000000       0.272600       0.069500       0.478000
54047     54047     neimenggu      123.2833       44.1333           63       213     2012      11        14        319              0.276833      -1.518402       0.000000       0.234410   -9999.000000   -9999.000000       0.069800       0.541000
54047     54047     neimenggu      123.2833       44.1333           63       213     2012      11        15        320              0.272167      -1.597839       0.000000       0.239829   -9999.000000       0.134200       0.060900   -9999.000000
54047     54047     neimenggu      123.2833       44.1333           63       213     2012      11        16        321              0.270167      -2.922913       0.000000       0.217360   -9999.000000       0.198300       0.052800       0.396000
54047     54047     neimenggu      123.2833       44.1333           63       213     2012      11        17        322              0.000000      -5.151215       0.000000       0.209445   -9999.000000       0.272500       0.047500       0.409000
54047     54047     neimenggu      123.2833       44.1333           63       213     2012      11        18        323              0.245000      -6.625031       0.000000       0.201359   -9999.000000       0.110000       0.059700       0.330000
54047     54047     neimenggu      123.2833       44.1333           63       213     2012      11        19        324              0.247042      -5.616394       0.000000       0.193521   -9999.000000       0.122600   -9999.000000       0.409000
54047     54047     neimenggu      123.2833       44.1333           63       213     2012      11        20        325              0.235667      -8.194275       0.000000       0.193195   -9999.000000   -9999.000000       0.043900       0.320000
54047     54047     neimenggu      123.2833       44.1333           63       213     2012      11        21        326              0.223167      -6.904449       0.000000       0.192814   -9999.000000       0.123000       0.047600       0.254000
54047     54047     neimenggu      123.2833       44.1333           63       213     2012      11        22        327              0.208000      -6.662445       0.000000       0.193738   -9999.000000   -9999.000000       0.044400       0.353000
54047     54047     neimenggu      123.2833       44.1333           63       213     2012      11        23        328              0.186000      -6.913696       0.000000       0.194010   -9999.000000   -9999.000000       0.046100   -9999.000000
54047     54047     neimenggu      123.2833       44.1333           63       213     2012      11        24        329              0.177208      -9.160339       0.000000       0.191492   -9999.000000       0.162500       0.048300       0.338000
54047     54047     neimenggu      123.2833       44.1333           63       213     2012      11        25        330              0.170250      -8.121979       0.000000       0.190607   -9999.000000       0.141300       0.042900       0.255000
54047     54047     neimenggu      123.2833       44.1333           63       213     2012      11        26        331              0.158375      -8.614532       0.000000       0.190866   -9999.000000       0.116200   -9999.000000       0.239000
54047     54047     neimenggu      123.2833       44.1333           63       213     2012      11        27        332              0.157167     -10.619507       0.000000       0.189409   -9999.000000   -9999.000000   -9999.000000       0.336000
54047     54047     neimenggu      123.2833       44.1333           63       213     2012      11        28        333              0.155833      -7.654419       0.000000       0.188906   -9999.000000   -9999.000000       0.039800   -9999.000000
54047     54047     neimenggu      123.2833       44.1333           63       213     2012      11        29        334              0.148792     -10.056641       0.000000       0.189277   -9999.000000       0.122400       0.041400       0.303000
54047     54047     neimenggu      123.2833       44.1333           63       213     2012      11        30        335              0.138875     -11.691528       0.000000       0.187795   -9999.000000       0.112100       0.041300       0.219000
54047     54047     neimenggu      123.2833       44.1333           63       213     2012      12        01        336              0.135250     -14.600189       0.000000       0.184425   -9999.000000   -9999.000000       0.035200   -9999.000000
54047     54047     neimenggu      123.2833       44.1333           63       213     2012      12        02        337              0.141792     -11.559204       0.000000       0.183688   -9999.000000   -9999.000000       0.033100       0.300000
54047     54047     neimenggu      123.2833       44.1333           63       213     2012      12        03        338              0.138208      -8.561920       0.000000       0.184686   -9999.000000   -9999.000000       0.033900       0.233000
54047     54047     neimenggu      123.2833       44.1333           63       213     2012      12        04        339              0.133583     -13.143646       0.000000       0.184598   -9999.000000       0.343300       0.031300       0.252000
54047     54047     neimenggu      123.2833       44.1333           63       213     2012      12        05        340              0.129000     -14.505188       0.000000       0.183537   -9999.000000       0.138600       0.032500       0.167000
54047     54047     neimenggu      123.2833       44.1333           63       213     2012      12        06        341              0.124542     -14.347107       0.000000       0.183599   -9999.000000   -9999.000000   -9999.000000       0.205000
54047     54047     neimenggu      123.2833       44.1333           63       213     2012      12        07        342              0.121667     -16.236542       0.000000       0.182896   -9999.000000   -9999.000000       0.026100       0.180000
54047     54047     neimenggu      123.2833       44.1333           63       213     2012      12        08        343              0.120167     -19.000000       0.000000       0.180375   -9999.000000   -9999.000000       0.029600       0.278000
54047     54047     neimenggu      123.2833       44.1333           63       213     2012      12        09        344              0.123750     -16.272186       0.000000       0.179748   -9999.000000   -9999.000000       0.023600       0.132000
54047     54047     neimenggu      123.2833       44.1333           63       213     2012      12        10        345              0.122750     -15.314636       0.000000       0.179979   -9999.000000   -9999.000000       0.020100       0.153000
54047     54047     neimenggu      123.2833       44.1333           63       213     2012      12        11        346              0.122417     -15.940948       0.000000       0.179876   -9999.000000   -9999.000000       0.018100       0.205000
54047     54047     neimenggu      123.2833       44.1333           63       213     2012      12        12        347              0.122583     -15.386261       0.000000       0.180219   -9999.000000   -9999.000000       0.015200       0.232000
54047     54047     neimenggu      123.2833       44.1333           63       213     2012      12        13        348              0.123500     -13.469940       0.000000       0.180413   -9999.000000   -9999.000000       0.013300       0.262000
54047     54047     neimenggu      123.2833       44.1333           63       213     2012      12        14        349              0.122500     -12.925903       0.000000       0.180856   -9999.000000   -9999.000000       0.017200   -9999.000000
54047     54047     neimenggu      123.2833       44.1333           63       213     2012      12        15        350              0.000000     -13.926788       0.000000       0.180956   -9999.000000   -9999.000000       0.011300       0.130000
54047     54047     neimenggu      123.2833       44.1333           63       213     2012      12        16        351              0.121167     -16.084167       0.000000       0.180767   -9999.000000   -9999.000000       0.014000       0.183000
54047     54047     neimenggu      123.2833       44.1333           63       213     2012      12        17        352              0.120167     -16.721497       0.000000       0.180074   -9999.000000   -9999.000000   -9999.000000       0.095000
54047     54047     neimenggu      123.2833       44.1333           63       213     2012      12        18        353              0.119000     -16.501373       0.000000       0.180046   -9999.000000   -9999.000000   -9999.000000       0.202000
54047     54047     neimenggu      123.2833       44.1333           63       213     2012      12        19        354              0.117833     -17.925919       0.000000       0.179603   -9999.000000   -9999.000000       0.011800       0.084000
54047     54047     neimenggu      123.2833       44.1333           63       213     2012      12        20        355              0.000000     -17.508438       0.000000       0.179533   -9999.000000   -9999.000000       0.016100       0.121000
54047     54047     neimenggu      123.2833       44.1333           63       213     2012      12        21        356              0.119750     -14.761047       0.000000       0.180052   -9999.000000   -9999.000000       0.013200       0.195000
54047     54047     neimenggu      123.2833       44.1333           63       213     2012      12        22        357              0.117417     -15.054443       0.000000       0.180450   -9999.000000   -9999.000000       0.013500   -9999.000000
54047     54047     neimenggu      123.2833       44.1333           63       213     2012      12        23        358              0.114750     -19.744568       0.000000       0.179102   -9999.000000   -9999.000000   -9999.000000       0.192000
54047     54047     neimenggu      123.2833       44.1333           63       213     2012      12        24        359              0.112800     -21.752701       0.000000       0.177535   -9999.000000   -9999.000000       0.010600       0.104000
54047     54047     neimenggu      123.2833       44.1333           63       213     2012      12        25        360              0.112333     -18.715424       0.000000       0.177758   -9999.000000   -9999.000000       0.015200       0.094000
54047     54047     neimenggu      123.2833       44.1333           63       213     2012      12        26        361              0.000000     -20.707809       0.000000       0.177848   -9999.000000   -9999.000000       0.014900       0.196000
54047     54047     neimenggu      123.2833       44.1333           63       213     2012      12        27        362              0.111800     -19.720459       0.000000       0.177028   -9999.000000   -9999.000000       0.019900   -9999.000000
54047     54047     neimenggu      123.2833       44.1333           63       213     2012      12        28        363              0.000000     -18.188858       0.000000       0.177738   -9999.000000   -9999.000000       0.022300       0.172000
54047     54047     neimenggu      123.2833       44.1333           63       213     2012      12        29        364              0.000000     -16.928131       0.000000       0.178210   -9999.000000   -9999.000000   -9999.000000       0.081000
54047     54047     neimenggu      123.2833       44.1333           63       213     2012      12        30        365              0.000000     -17.089539       0.000000       0.178460   -9999.000000   -9999.000000       0.013400   -9999.000000
54047     54047     neimenggu      123.2833       44.1333           63       213     2012      12        31        366              0.111267     -20.796219       2.155620       0.177371   -9999.000000   -9999.000000       0.013600       0.095000
