# Supplementary material for: Research on Fusing Multisatellite Soil Moisture Data Based on Bayesian Model Averaging
Source: Hindawi journal article supplement (doi:10.1155/2018/9310838), 2018-06-25
Supplement: f1 [file 9310838.f1.zip › 2012_sm00-10cm_daily_ZDB_ZHY_54213_366days_allin.txt]

54213     54213     neimenggu      119.0197       42.9300           68       196     2012      01        01        001              0.000000   -9999.000000       0.000000   -9999.000000   -9999.000000   -9999.000000       0.081100   -9999.000000
54213     54213     neimenggu      119.0197       42.9300           68       196     2012      01        02        002              0.000000     -10.153229       0.000000       0.086580   -9999.000000   -9999.000000       0.070700       0.069000
54213     54213     neimenggu      119.0197       42.9300           68       196     2012      01        03        003              0.000000      -9.622131       0.000000       0.086630   -9999.000000   -9999.000000       0.070100       0.028000
54213     54213     neimenggu      119.0197       42.9300           68       196     2012      01        04        004              0.000000      -9.731812       0.000000       0.086666   -9999.000000   -9999.000000       0.069900       0.075000
54213     54213     neimenggu      119.0197       42.9300           68       196     2012      01        05        005              0.000000     -10.239655       0.000000       0.086689   -9999.000000   -9999.000000       0.076400   -9999.000000
54213     54213     neimenggu      119.0197       42.9300           68       196     2012      01        06        006              0.000000     -10.553528       0.000000       0.086705   -9999.000000   -9999.000000       0.081600       0.097000
54213     54213     neimenggu      119.0197       42.9300           68       196     2012      01        07        007              0.000000     -11.717438       0.000000       0.086714   -9999.000000   -9999.000000   -9999.000000       0.030000
54213     54213     neimenggu      119.0197       42.9300           68       196     2012      01        08        008              0.000000     -12.298401       0.000000       0.086531   -9999.000000   -9999.000000       0.070400       0.052000
54213     54213     neimenggu      119.0197       42.9300           68       196     2012      01        09        009              0.000000     -11.918915       0.000000       0.086561   -9999.000000   -9999.000000       0.072200       0.043000
54213     54213     neimenggu      119.0197       42.9300           68       196     2012      01        10        010              0.000000     -11.460297       0.000000       0.086478   -9999.000000   -9999.000000       0.084100       0.049000
54213     54213     neimenggu      119.0197       42.9300           68       196     2012      01        11        011              0.000000     -13.221191       0.000000       0.086123   -9999.000000   -9999.000000       0.079700       0.079000
54213     54213     neimenggu      119.0197       42.9300           68       196     2012      01        12        012              0.000000     -10.541565       0.000000       0.086353   -9999.000000   -9999.000000       0.083800       0.092000
54213     54213     neimenggu      119.0197       42.9300           68       196     2012      01        13        013              0.000000      -9.687958       0.000000       0.086581   -9999.000000   -9999.000000       0.069500       0.080000
54213     54213     neimenggu      119.0197       42.9300           68       196     2012      01        14        014              0.000000      -9.100372       0.000000       0.086355   -9999.000000   -9999.000000       0.074500       0.062000
54213     54213     neimenggu      119.0197       42.9300           68       196     2012      01        15        015              0.000000     -10.160858       0.000000       0.085736   -9999.000000   -9999.000000       0.078600       0.182000
54213     54213     neimenggu      119.0197       42.9300           68       196     2012      01        16        016              0.000000      -9.450439       0.000000       0.085551   -9999.000000   -9999.000000       0.079100       0.062000
54213     54213     neimenggu      119.0197       42.9300           68       196     2012      01        17        017              0.000000     -11.381897       0.000000       0.085136   -9999.000000   -9999.000000       0.082600       0.052000
54213     54213     neimenggu      119.0197       42.9300           68       196     2012      01        18        018              0.000000     -12.719086       0.000000       0.084639   -9999.000000   -9999.000000       0.086700   -9999.000000
54213     54213     neimenggu      119.0197       42.9300           68       196     2012      01        19        019              0.000000     -11.053741       0.000000       0.084849   -9999.000000   -9999.000000       0.080900       0.062000
54213     54213     neimenggu      119.0197       42.9300           68       196     2012      01        20        020              0.000000     -11.823334       0.000000       0.084743   -9999.000000   -9999.000000       0.078900       0.021000
54213     54213     neimenggu      119.0197       42.9300           68       196     2012      01        21        021              0.000000     -15.707794       0.000000       0.083942   -9999.000000   -9999.000000       0.076500   -9999.000000
54213     54213     neimenggu      119.0197       42.9300           68       196     2012      01        22        022              0.000000     -17.016113       0.000000       0.083337   -9999.000000   -9999.000000       0.083600       0.035000
54213     54213     neimenggu      119.0197       42.9300           68       196     2012      01        23        023              0.000000     -16.436310       0.000000       0.083399   -9999.000000   -9999.000000       0.093000       0.097000
54213     54213     neimenggu      119.0197       42.9300           68       196     2012      01        24        024              0.000000     -15.365112       0.000000       0.083434   -9999.000000   -9999.000000   -9999.000000       0.052000
54213     54213     neimenggu      119.0197       42.9300           68       196     2012      01        25        025              0.000000     -15.492462       0.000000       0.083430   -9999.000000   -9999.000000       0.079200       0.053000
54213     54213     neimenggu      119.0197       42.9300           68       196     2012      01        26        026              0.000000     -13.394257       0.000000       0.083575   -9999.000000   -9999.000000       0.080300       0.093000
54213     54213     neimenggu      119.0197       42.9300           68       196     2012      01        27        027              0.000000     -13.314819       0.000000       0.083383   -9999.000000   -9999.000000       0.093400       0.018000
54213     54213     neimenggu      119.0197       42.9300           68       196     2012      01        28        028              0.000000     -14.835815       0.000000       0.082824   -9999.000000   -9999.000000       0.090600       0.048000
54213     54213     neimenggu      119.0197       42.9300           68       196     2012      01        29        029              0.000000     -13.575836       0.000000       0.082790   -9999.000000   -9999.000000       0.084600   -9999.000000
54213     54213     neimenggu      119.0197       42.9300           68       196     2012      01        30        030              0.000000     -16.256256       0.000000       0.082306   -9999.000000   -9999.000000       0.075500       0.081000
54213     54213     neimenggu      119.0197       42.9300           68       196     2012      01        31        031              0.000000     -15.066284       0.000000       0.082148   -9999.000000   -9999.000000       0.082100       0.081000
54213     54213     neimenggu      119.0197       42.9300           68       196     2012      02        01        032              0.000000     -16.197906       0.000000       0.082456   -9999.000000   -9999.000000   -9999.000000       0.008000
54213     54213     neimenggu      119.0197       42.9300           68       196     2012      02        02        033              0.000000     -16.769226       0.000000       0.082435   -9999.000000   -9999.000000       0.086500       0.097000
54213     54213     neimenggu      119.0197       42.9300           68       196     2012      02        03        034              0.000000     -14.314423       0.000000       0.082887   -9999.000000   -9999.000000       0.082400   -9999.000000
54213     54213     neimenggu      119.0197       42.9300           68       196     2012      02        04        035              0.000000     -12.475403       0.000000       0.083195   -9999.000000   -9999.000000       0.090800       0.048000
54213     54213     neimenggu      119.0197       42.9300           68       196     2012      02        05        036              0.000000     -10.068146       0.000000       0.083488   -9999.000000   -9999.000000       0.071700       0.035000
54213     54213     neimenggu      119.0197       42.9300           68       196     2012      02        06        037              0.000000      -8.050995       0.000000       0.088758   -9999.000000   -9999.000000       0.081000       0.042000
54213     54213     neimenggu      119.0197       42.9300           68       196     2012      02        07        038              0.000000     -14.258118       0.000000       0.083428   -9999.000000   -9999.000000       0.077500       0.024000
54213     54213     neimenggu      119.0197       42.9300           68       196     2012      02        08        039              0.000000     -13.908234       0.000000       0.083072   -9999.000000   -9999.000000       0.085800   -9999.000000
54213     54213     neimenggu      119.0197       42.9300           68       196     2012      02        09        040              0.000000     -12.055542       0.000000       0.083550   -9999.000000   -9999.000000       0.088800       0.010000
54213     54213     neimenggu      119.0197       42.9300           68       196     2012      02        10        041              0.000000     -10.728394       0.000000       0.083504   -9999.000000   -9999.000000   -9999.000000       0.010000
54213     54213     neimenggu      119.0197       42.9300           68       196     2012      02        11        042              0.000000     -10.104797       0.000000       0.083266   -9999.000000   -9999.000000       0.074300       0.061000
54213     54213     neimenggu      119.0197       42.9300           68       196     2012      02        12        043              0.000000     -10.684113       0.000000       0.082955   -9999.000000   -9999.000000       0.079600       0.079000
54213     54213     neimenggu      119.0197       42.9300           68       196     2012      02        13        044              0.000000      -6.368622       0.000000       0.098894   -9999.000000   -9999.000000       0.082900       0.157000
54213     54213     neimenggu      119.0197       42.9300           68       196     2012      02        14        045              0.000000      -5.828888       0.000000       0.106392   -9999.000000   -9999.000000       0.090700       0.062000
54213     54213     neimenggu      119.0197       42.9300           68       196     2012      02        15        046              0.000000      -9.701172       0.000000       0.089561   -9999.000000   -9999.000000       0.093900       0.069000
54213     54213     neimenggu      119.0197       42.9300           68       196     2012      02        16        047              0.000000      -8.701813       0.000000       0.089414   -9999.000000   -9999.000000       0.087200   -9999.000000
54213     54213     neimenggu      119.0197       42.9300           68       196     2012      02        17        048              0.000000     -11.286591       0.000000       0.087973   -9999.000000   -9999.000000       0.090400       0.044000
54213     54213     neimenggu      119.0197       42.9300           68       196     2012      02        18        049              0.000000     -11.064240       0.000000       0.087571   -9999.000000   -9999.000000   -9999.000000       0.089000
54213     54213     neimenggu      119.0197       42.9300           68       196     2012      02        19        050              0.000000      -8.265961       3.741602       0.088191   -9999.000000   -9999.000000       0.086300   -9999.000000
54213     54213     neimenggu      119.0197       42.9300           68       196     2012      02        20        051              0.000000      -5.558716       0.000000       0.115021   -9999.000000   -9999.000000       0.085000       0.113000
54213     54213     neimenggu      119.0197       42.9300           68       196     2012      02        21        052              0.000000      -9.425201       0.000000       0.088761   -9999.000000   -9999.000000       0.091000       0.004000
54213     54213     neimenggu      119.0197       42.9300           68       196     2012      02        22        053              0.000000      -8.407593       0.000000       0.088125   -9999.000000   -9999.000000       0.073000       0.054000
54213     54213     neimenggu      119.0197       42.9300           68       196     2012      02        23        054              0.000000      -8.763306       0.696173       0.086802   -9999.000000   -9999.000000       0.076300       0.032000
54213     54213     neimenggu      119.0197       42.9300           68       196     2012      02        24        055              0.000000      -5.053406       0.000000       0.106341       0.131000   -9999.000000       0.076200       0.113000
54213     54213     neimenggu      119.0197       42.9300           68       196     2012      02        25        056              0.000000      -5.637665       0.000000       0.112734   -9999.000000       0.158800       0.079100       0.060000
54213     54213     neimenggu      119.0197       42.9300           68       196     2012      02        26        057              0.000000      -6.896240      15.541169       0.097786   -9999.000000   -9999.000000       0.087800       0.072000
54213     54213     neimenggu      119.0197       42.9300           68       196     2012      02        27        058              0.001222      -6.331696       1.411578       0.106080       0.104000   -9999.000000   -9999.000000   -9999.000000
54213     54213     neimenggu      119.0197       42.9300           68       196     2012      02        28        059              0.006000      -3.593597       0.755789       0.131180   -9999.000000   -9999.000000       0.084900       0.001000
54213     54213     neimenggu      119.0197       42.9300           68       196     2012      02        29        060              0.000000   -9999.000000       0.340254   -9999.000000   -9999.000000       0.071300   -9999.000000   -9999.000000
54213     54213     neimenggu      119.0197       42.9300           68       196     2012      03        01        061              0.008083      -0.306396       0.828533       0.162767       0.118000       0.070600       0.084900       0.014000
54213     54213     neimenggu      119.0197       42.9300           68       196     2012      03        02        062              0.005000      -4.145721       1.153326       0.134723       0.103000   -9999.000000       0.082700       0.060000
54213     54213     neimenggu      119.0197       42.9300           68       196     2012      03        03        063              0.005810      -5.541565       1.497231       0.112379       0.104000   -9999.000000       0.087100   -9999.000000
54213     54213     neimenggu      119.0197       42.9300           68       196     2012      03        04        064              0.009042      -2.477539       0.703957       0.127159   -9999.000000   -9999.000000       0.079000       0.026000
54213     54213     neimenggu      119.0197       42.9300           68       196     2012      03        05        065              0.009167      -1.943756       1.308530       0.141198   -9999.000000       0.061300       0.065700       0.044000
54213     54213     neimenggu      119.0197       42.9300           68       196     2012      03        06        066              0.007583      -3.044434       0.437348       0.115032   -9999.000000   -9999.000000       0.063600   -9999.000000
54213     54213     neimenggu      119.0197       42.9300           68       196     2012      03        07        067              0.000000      -5.052704       0.000000       0.113111   -9999.000000   -9999.000000       0.062600       0.079000
54213     54213     neimenggu      119.0197       42.9300           68       196     2012      03        08        068              0.002750      -5.943481       0.000000       0.106515   -9999.000000   -9999.000000       0.064600   -9999.000000
54213     54213     neimenggu      119.0197       42.9300           68       196     2012      03        09        069              0.001882      -8.515259       0.000000       0.092469   -9999.000000       0.150400       0.065600       0.021000
54213     54213     neimenggu      119.0197       42.9300           68       196     2012      03        10        070              0.000714      -6.380371       0.000000       0.096612   -9999.000000   -9999.000000       0.059100       0.112000
54213     54213     neimenggu      119.0197       42.9300           68       196     2012      03        11        071              0.000857      -8.830688       0.000000       0.089253   -9999.000000   -9999.000000       0.062500       0.180000
54213     54213     neimenggu      119.0197       42.9300           68       196     2012      03        12        072              0.013579      -6.461090       0.000000       0.099646       0.124000       0.071700       0.083700       0.072000
54213     54213     neimenggu      119.0197       42.9300           68       196     2012      03        13        073              0.015273      -2.510376       0.560337       0.137231       0.120000   -9999.000000       0.082100       0.497000
54213     54213     neimenggu      119.0197       42.9300           68       196     2012      03        14        074              0.019292      -0.566345       4.491426       0.161488       0.120000   -9999.000000       0.086500       0.117000
54213     54213     neimenggu      119.0197       42.9300           68       196     2012      03        15        075              0.028542       1.240021       1.449714       0.190106   -9999.000000       0.109000   -9999.000000       0.271000
54213     54213     neimenggu      119.0197       42.9300           68       196     2012      03        16        076              0.059087       2.885101       0.949218       0.233141       0.121000       0.100800       0.089100   -9999.000000
54213     54213     neimenggu      119.0197       42.9300           68       196     2012      03        17        077              0.035435       3.823547       1.755765       0.217412   -9999.000000   -9999.000000       0.076200       0.027000
54213     54213     neimenggu      119.0197       42.9300           68       196     2012      03        18        078              0.020708      -2.047211       0.000000       0.146271   -9999.000000   -9999.000000       0.069700       0.065000
54213     54213     neimenggu      119.0197       42.9300           68       196     2012      03        19        079              0.022750      -3.494965       0.000000       0.111034       0.120000       0.087600       0.083900   -9999.000000
54213     54213     neimenggu      119.0197       42.9300           68       196     2012      03        20        080              0.029500      -0.705688       7.772613       0.163415   -9999.000000       0.044800       0.088300       0.132000
54213     54213     neimenggu      119.0197       42.9300           68       196     2012      03        21        081              0.048917       1.913849       0.278013       0.190483   -9999.000000   -9999.000000       0.086200       0.157000
54213     54213     neimenggu      119.0197       42.9300           68       196     2012      03        22        082              0.061958       3.294464       0.801304       0.208785       0.120000   -9999.000000       0.081900       0.121000
54213     54213     neimenggu      119.0197       42.9300           68       196     2012      03        23        083              0.072958       3.098358       0.505063       0.214337   -9999.000000   -9999.000000       0.102400       0.342000
54213     54213     neimenggu      119.0197       42.9300           68       196     2012      03        24        084              0.057333       1.222107       2.135971       0.197717       0.096000       0.106400   -9999.000000       0.136000
54213     54213     neimenggu      119.0197       42.9300           68       196     2012      03        25        085              0.000000       1.088440       0.821785       0.193837   -9999.000000   -9999.000000       0.088500       0.145000
54213     54213     neimenggu      119.0197       42.9300           68       196     2012      03        26        086              0.080125       2.014465       0.544300       0.202313   -9999.000000       0.242200       0.086100   -9999.000000
54213     54213     neimenggu      119.0197       42.9300           68       196     2012      03        27        087              0.089167       5.490692       3.445454       0.244352       0.109000   -9999.000000       0.074800   -9999.000000
54213     54213     neimenggu      119.0197       42.9300           68       196     2012      03        28        088              0.091958       6.712616       1.491702       0.245658       0.115000       0.017200       0.076100       0.113000
54213     54213     neimenggu      119.0197       42.9300           68       196     2012      03        29        089              0.090167       9.627716       0.857772       0.254407       0.093000       0.031000       0.092900       0.144000
54213     54213     neimenggu      119.0197       42.9300           68       196     2012      03        30        090              0.082000       5.798004      12.242961       0.230188       0.115000   -9999.000000       0.088300       0.001000
54213     54213     neimenggu      119.0197       42.9300           68       196     2012      03        31        091              0.076417       1.801788       3.103259       0.193991   -9999.000000       0.032000       0.093400       0.030000
54213     54213     neimenggu      119.0197       42.9300           68       196     2012      04        01        092              0.074500       1.158722       0.832537       0.198055       0.109000   -9999.000000   -9999.000000   -9999.000000
54213     54213     neimenggu      119.0197       42.9300           68       196     2012      04        02        093              0.078708       1.542358       2.074003       0.194890       0.112000       0.048400       0.087200       0.033000
54213     54213     neimenggu      119.0197       42.9300           68       196     2012      04        03        094              0.080000       2.603302       1.270978       0.213835       0.101000       0.016800       0.085900       0.135000
54213     54213     neimenggu      119.0197       42.9300           68       196     2012      04        04        095              0.079000       4.377960       0.416779       0.249712       0.085000       0.045400       0.088400       0.081000
54213     54213     neimenggu      119.0197       42.9300           68       196     2012      04        05        096              0.076750       4.383789       0.540928       0.237701   -9999.000000       0.069300       0.090100       0.141000
54213     54213     neimenggu      119.0197       42.9300           68       196     2012      04        06        097              0.077708       3.875854       1.309952       0.222067       0.118000   -9999.000000       0.097300   -9999.000000
54213     54213     neimenggu      119.0197       42.9300           68       196     2012      04        07        098              0.081750       5.085114       0.386987       0.237190       0.106500       0.026800       0.084300       0.082000
54213     54213     neimenggu      119.0197       42.9300           68       196     2012      04        08        099              0.080083      10.448700       0.641348       0.250266       0.106000       0.070500       0.092300       0.152000
54213     54213     neimenggu      119.0197       42.9300           68       196     2012      04        09        100              0.083292       8.463654       0.230875       0.244654       0.109000       0.042800       0.088700       0.037000
54213     54213     neimenggu      119.0197       42.9300           68       196     2012      04        10        101              0.079000      13.682281       0.296553       0.242432   -9999.000000       0.042600       0.096200       0.095000
54213     54213     neimenggu      119.0197       42.9300           68       196     2012      04        11        102              0.076167       7.671753       0.260198       0.233617       0.107000   -9999.000000       0.103900       0.226000
54213     54213     neimenggu      119.0197       42.9300           68       196     2012      04        12        103              0.075375       9.317993       0.264912       0.239043       0.106500   -9999.000000       0.101600       0.063000
54213     54213     neimenggu      119.0197       42.9300           68       196     2012      04        13        104              0.075667      10.430634       0.370135       0.236603       0.095000   -9999.000000       0.089500       0.139000
54213     54213     neimenggu      119.0197       42.9300           68       196     2012      04        14        105              0.072958      13.514587       0.265576       0.233264       0.096500   -9999.000000       0.091400   -9999.000000
54213     54213     neimenggu      119.0197       42.9300           68       196     2012      04        15        106              0.065583      12.746765       0.242741       0.230296       0.097000       0.019900       0.103000       0.148000
54213     54213     neimenggu      119.0197       42.9300           68       196     2012      04        16        107              0.065208       7.282166       0.178653       0.226508       0.101000       0.024700       0.087100       0.017000
54213     54213     neimenggu      119.0197       42.9300           68       196     2012      04        17        108              0.065583      11.459808       0.146534       0.228459       0.103000   -9999.000000   -9999.000000   -9999.000000
54213     54213     neimenggu      119.0197       42.9300           68       196     2012      04        18        109              0.063792      16.203705       0.240270       0.223208       0.100000       0.023800   -9999.000000       0.233000
54213     54213     neimenggu      119.0197       42.9300           68       196     2012      04        19        110              0.059042      18.076477       1.158634       0.218114       0.100000   -9999.000000       0.084100       0.221000
54213     54213     neimenggu      119.0197       42.9300           68       196     2012      04        20        111              0.054875      15.308899       0.338749       0.225534       0.107000       0.031300   -9999.000000       0.140000
54213     54213     neimenggu      119.0197       42.9300           68       196     2012      04        21        112              0.052750      15.042786       0.000000       0.225006       0.116000       0.022500       0.092600       0.060000
54213     54213     neimenggu      119.0197       42.9300           68       196     2012      04        22        113              0.052083      15.222961       0.000000       0.222493       0.105000   -9999.000000       0.087400       0.173000
54213     54213     neimenggu      119.0197       42.9300           68       196     2012      04        23        114              0.050333      17.297089       3.148340       0.217074       0.109000   -9999.000000       0.149100       0.135000
54213     54213     neimenggu      119.0197       42.9300           68       196     2012      04        24        115              0.145917      18.755096      28.957815       0.219573   -9999.000000   -9999.000000       0.188900       0.760000
54213     54213     neimenggu      119.0197       42.9300           68       196     2012      04        25        116              0.000000      10.912811       1.405371       0.319557       0.139000       0.163200       0.139500   -9999.000000
54213     54213     neimenggu      119.0197       42.9300           68       196     2012      04        26        117              0.143625       9.685211       0.601562       0.287355       0.134000       0.153600       0.111700       0.273000
54213     54213     neimenggu      119.0197       42.9300           68       196     2012      04        27        118              0.131333      13.682343       2.103711       0.277117   -9999.000000       0.098300   -9999.000000       0.222000
54213     54213     neimenggu      119.0197       42.9300           68       196     2012      04        28        119              0.125833       7.888947       2.392090       0.273139       0.110000       0.129100       0.112100       0.077000
54213     54213     neimenggu      119.0197       42.9300           68       196     2012      04        29        120              0.124125       9.330902       0.553320       0.273606       0.095000   -9999.000000   -9999.000000       0.264000
54213     54213     neimenggu      119.0197       42.9300           68       196     2012      04        30        121              0.118292      14.687195       7.354102       0.264121       0.103000   -9999.000000       0.103600   -9999.000000
54213     54213     neimenggu      119.0197       42.9300           68       196     2012      05        01        122              0.113292      14.812164       1.854293       0.282862       0.192000   -9999.000000       0.086700       0.124000
54213     54213     neimenggu      119.0197       42.9300           68       196     2012      05        02        123              0.109250      15.298248       0.222026       0.273879       0.111000       0.357900       0.109600       0.193000
54213     54213     neimenggu      119.0197       42.9300           68       196     2012      05        03        124              0.101583      16.964020       0.000000       0.269014       0.099000   -9999.000000       0.096100       0.191000
54213     54213     neimenggu      119.0197       42.9300           68       196     2012      05        04        125              0.091458      19.541626       0.000000       0.257138       0.086000       0.184500       0.100600       0.183000
54213     54213     neimenggu      119.0197       42.9300           68       196     2012      05        05        126              0.079917      17.485565       0.334137       0.247657       0.092500       0.238300       0.085800   -9999.000000
54213     54213     neimenggu      119.0197       42.9300           68       196     2012      05        06        127              0.072458      15.964417       0.350429       0.241112       0.094500       0.083300       0.080000       0.105000
54213     54213     neimenggu      119.0197       42.9300           68       196     2012      05        07        128              0.065125      16.897797       0.474482       0.238597   -9999.000000   -9999.000000       0.083600       0.155000
54213     54213     neimenggu      119.0197       42.9300           68       196     2012      05        08        129              0.060833      17.234100       0.000000       0.240044       0.095500       0.058000       0.092500       0.100000
54213     54213     neimenggu      119.0197       42.9300           68       196     2012      05        09        130              0.057333      18.303345       2.112437       0.232096       0.088000       0.102800       0.117200       0.187000
54213     54213     neimenggu      119.0197       42.9300           68       196     2012      05        10        131              0.053708      19.818207       0.170059       0.234989       0.079000   -9999.000000       0.093700       0.434000
54213     54213     neimenggu      119.0197       42.9300           68       196     2012      05        11        132              0.070625      19.034393       9.871708       0.235041       0.226000       0.225100       0.171000       0.213000
54213     54213     neimenggu      119.0197       42.9300           68       196     2012      05        12        133              0.111042      13.496216       0.988203       0.282721       0.171000       0.215500       0.126800       0.399000
54213     54213     neimenggu      119.0197       42.9300           68       196     2012      05        13        134              0.112625      13.300720       3.566359       0.271212       0.188000       0.107300       0.143600   -9999.000000
54213     54213     neimenggu      119.0197       42.9300           68       196     2012      05        14        135              0.106917      12.093140       0.000000       0.275757       0.119000       0.228200       0.092600       0.220000
54213     54213     neimenggu      119.0197       42.9300           68       196     2012      05        15        136              0.094542      12.340332       0.402536       0.261725       0.103000       0.146000       0.095400       0.223000
54213     54213     neimenggu      119.0197       42.9300           68       196     2012      05        16        137              0.081458      13.302643       0.656109       0.254841       0.112500       0.164100   -9999.000000   -9999.000000
54213     54213     neimenggu      119.0197       42.9300           68       196     2012      05        17        138              0.075875      12.090179       0.000000       0.255560       0.109000   -9999.000000       0.074200       0.253000
54213     54213     neimenggu      119.0197       42.9300           68       196     2012      05        18        139              0.067958      18.906372       0.504425       0.246791       0.103000   -9999.000000       0.080200       0.290000
54213     54213     neimenggu      119.0197       42.9300           68       196     2012      05        19        140              0.058708      22.097321       0.000000       0.239198       0.098500   -9999.000000       0.088300       0.201000
54213     54213     neimenggu      119.0197       42.9300           68       196     2012      05        20        141              0.055042      18.165741       0.000000       0.232379       0.085000   -9999.000000       0.086800       0.239000
54213     54213     neimenggu      119.0197       42.9300           68       196     2012      05        21        142              0.051625      21.139984       0.792367       0.227096       0.104000   -9999.000000       0.127600       0.187000
54213     54213     neimenggu      119.0197       42.9300           68       196     2012      05        22        143              0.046167      22.943481       0.173040       0.221112       0.115000       0.077400       0.078300       0.155000
54213     54213     neimenggu      119.0197       42.9300           68       196     2012      05        23        144              0.043333      18.221924       0.000000       0.221325   -9999.000000   -9999.000000       0.082600       0.262000
54213     54213     neimenggu      119.0197       42.9300           68       196     2012      05        24        145              0.040167      17.158325       0.000000       0.213518       0.108000   -9999.000000       0.080000   -9999.000000
54213     54213     neimenggu      119.0197       42.9300           68       196     2012      05        25        146              0.000000      16.679993       0.000000       0.209010       0.101000   -9999.000000       0.087500       0.149000
54213     54213     neimenggu      119.0197       42.9300           68       196     2012      05        26        147              0.035583      18.621735       4.096935       0.204419       0.074000   -9999.000000       0.082300       0.165000
54213     54213     neimenggu      119.0197       42.9300           68       196     2012      05        27        148              0.034708      18.485229       0.000000       0.203446       0.105000       0.054500       0.093200       0.223000
54213     54213     neimenggu      119.0197       42.9300           68       196     2012      05        28        149              0.034750      20.916199       0.000000       0.197974       0.101000   -9999.000000       0.075600       0.325000
54213     54213     neimenggu      119.0197       42.9300           68       196     2012      05        29        150              0.029292      23.952698       6.365344       0.190670       0.112000       0.149700       0.097500   -9999.000000
54213     54213     neimenggu      119.0197       42.9300           68       196     2012      05        30        151              0.028250      17.245483       0.000000       0.229401       0.104000       0.244500       0.086800   -9999.000000
54213     54213     neimenggu      119.0197       42.9300           68       196     2012      05        31        152              0.031333      16.567017       0.100129       0.231741       0.091000       0.293200   -9999.000000   -9999.000000
54213     54213     neimenggu      119.0197       42.9300           68       196     2012      06        01        153              0.030458      19.494171       4.925365       0.218042       0.149000       0.187300       0.114300       0.227000
54213     54213     neimenggu      119.0197       42.9300           68       196     2012      06        02        154              0.027583      17.260559       2.982613       0.247012       0.165000       0.240400   -9999.000000       0.496000
54213     54213     neimenggu      119.0197       42.9300           68       196     2012      06        03        155              0.027125      16.749420       2.081175       0.248837       0.144000       0.101200       0.082800   -9999.000000
54213     54213     neimenggu      119.0197       42.9300           68       196     2012      06        04        156              0.027625      18.871796       0.413519       0.255353       0.160000   -9999.000000       0.097000       0.390000
54213     54213     neimenggu      119.0197       42.9300           68       196     2012      06        05        157              0.029167      18.661285       0.000000       0.244738       0.122000   -9999.000000       0.086600       0.304000
54213     54213     neimenggu      119.0197       42.9300           68       196     2012      06        06        158              0.026792      21.147461       1.173128       0.230434       0.126000   -9999.000000       0.090200       0.256000
54213     54213     neimenggu      119.0197       42.9300           68       196     2012      06        07        159              0.027792      21.345062       2.516284       0.226027       0.130000       0.214100       0.087200       0.388000
54213     54213     neimenggu      119.0197       42.9300           68       196     2012      06        08        160              0.048000      22.531403       6.847695       0.234317       0.172000       0.039700       0.118800       0.430000
54213     54213     neimenggu      119.0197       42.9300           68       196     2012      06        09        161              0.058208      21.599396       1.624059       0.265168       0.129000       0.139500       0.089900       0.477000
54213     54213     neimenggu      119.0197       42.9300           68       196     2012      06        10        162              0.050542      19.897278       0.000000       0.246586       0.104000       0.046700       0.075800       0.263000
54213     54213     neimenggu      119.0197       42.9300           68       196     2012      06        11        163              0.000000      18.155182       1.895201       0.232489       0.149000   -9999.000000       0.121200   -9999.000000
54213     54213     neimenggu      119.0197       42.9300           68       196     2012      06        12        164              0.042458      16.520630       0.210266       0.240771       0.167000   -9999.000000       0.110100       0.306000
54213     54213     neimenggu      119.0197       42.9300           68       196     2012      06        13        165              0.075625      16.936798      24.525715       0.237309       0.271000       0.084700       0.172000       0.367000
54213     54213     neimenggu      119.0197       42.9300           68       196     2012      06        14        166              0.195708      15.286041      78.732582       0.302563   -9999.000000       0.294800       0.151000   -9999.000000
54213     54213     neimenggu      119.0197       42.9300           68       196     2012      06        15        167              0.199125      14.338409      10.064188       0.361866       0.258000       0.219200       0.198500       0.847000
54213     54213     neimenggu      119.0197       42.9300           68       196     2012      06        16        168              0.179208      15.825317       1.617136       0.329761       0.195000       0.252200       0.170600       0.702000
54213     54213     neimenggu      119.0197       42.9300           68       196     2012      06        17        169              0.167750      21.161102       0.180982       0.303478       0.196500       0.190400       0.130200       0.707000
54213     54213     neimenggu      119.0197       42.9300           68       196     2012      06        18        170              0.157792      22.137665       0.000000       0.290310       0.176000       0.201300       0.111300       0.629000
54213     54213     neimenggu      119.0197       42.9300           68       196     2012      06        19        171              0.151667      22.552826       0.000000       0.280889       0.143500       0.168400   -9999.000000   -9999.000000
54213     54213     neimenggu      119.0197       42.9300           68       196     2012      06        20        172              0.145917      23.536774       0.000000       0.272040       0.136000       0.112700       0.090600       0.548000
54213     54213     neimenggu      119.0197       42.9300           68       196     2012      06        21        173              0.139167      23.054932      12.226477       0.267974       0.136000   -9999.000000       0.080900       0.661000
54213     54213     neimenggu      119.0197       42.9300           68       196     2012      06        22        174              0.188167      24.504395       5.841891       0.271315       0.171000       0.222700       0.111400   -9999.000000
54213     54213     neimenggu      119.0197       42.9300           68       196     2012      06        23        175              0.174542      22.436981       3.884066       0.296758       0.176000   -9999.000000       0.104200       0.611000
54213     54213     neimenggu      119.0197       42.9300           68       196     2012      06        24        176              0.166708      23.835236       2.440615       0.290323       0.209000       0.268500       0.118500       0.731000
54213     54213     neimenggu      119.0197       42.9300           68       196     2012      06        25        177              0.168333      22.518707       0.386534       0.286140       0.185000       0.197900       0.128100       0.570000
54213     54213     neimenggu      119.0197       42.9300           68       196     2012      06        26        178              0.157375      22.553802       0.104875       0.279723       0.130000       0.167500       0.104700       0.690000
54213     54213     neimenggu      119.0197       42.9300           68       196     2012      06        27        179              0.132583      24.121857       0.055706       0.269269       0.153000   -9999.000000       0.103700   -9999.000000
54213     54213     neimenggu      119.0197       42.9300           68       196     2012      06        28        180              0.119125      25.671967       0.876089       0.260282       0.178000       0.134900       0.126300       0.562000
54213     54213     neimenggu      119.0197       42.9300           68       196     2012      06        29        181              0.115583      22.023773       0.000000       0.261267       0.146000       0.141000       0.101700       0.666000
54213     54213     neimenggu      119.0197       42.9300           68       196     2012      06        30        182              0.110625      23.525818       1.078414       0.254005       0.125000       0.401400       0.095400   -9999.000000
54213     54213     neimenggu      119.0197       42.9300           68       196     2012      07        01        183              0.105500      25.539398       0.000000       0.244074       0.122000       0.060500       0.080900       0.457000
54213     54213     neimenggu      119.0197       42.9300           68       196     2012      07        02        184              0.102083      23.412109       0.703148       0.236946       0.159500       0.049500       0.084000   -9999.000000
54213     54213     neimenggu      119.0197       42.9300           68       196     2012      07        03        185              0.099833      23.031067       0.000000       0.237593       0.146000       0.226400       0.093400       0.411000
54213     54213     neimenggu      119.0197       42.9300           68       196     2012      07        04        186              0.098625      22.465729       0.000000       0.234287       0.145000       0.250700       0.089500       0.426000
54213     54213     neimenggu      119.0197       42.9300           68       196     2012      07        05        187              0.097208      24.531982       0.000000       0.227801       0.130000       0.384600       0.090200       0.412000
54213     54213     neimenggu      119.0197       42.9300           68       196     2012      07        06        188              0.096583      24.726624       0.000000       0.225397   -9999.000000       0.074000       0.078200       0.411000
54213     54213     neimenggu      119.0197       42.9300           68       196     2012      07        07        189              0.105667      25.897125      24.703543       0.219187   -9999.000000       0.140700       0.079100       0.503000
54213     54213     neimenggu      119.0197       42.9300           68       196     2012      07        08        190              0.127917      26.078186       0.097670       0.275930       0.149000       0.462600       0.090500       0.694000
54213     54213     neimenggu      119.0197       42.9300           68       196     2012      07        09        191              0.120167      26.769135       3.017644       0.282918       0.181000       0.147500       0.092100       0.509000
54213     54213     neimenggu      119.0197       42.9300           68       196     2012      07        10        192              0.134292      26.973206      13.461598       0.276522       0.214000       0.210400       0.127600   -9999.000000
54213     54213     neimenggu      119.0197       42.9300           68       196     2012      07        11        193              0.139667      22.276642      10.696276       0.301730       0.275500   -9999.000000       0.137200       0.855000
54213     54213     neimenggu      119.0197       42.9300           68       196     2012      07        12        194              0.145208      19.776489      18.282883       0.311798       0.235000       0.245400       0.137500       0.976000
54213     54213     neimenggu      119.0197       42.9300           68       196     2012      07        13        195              0.140458      19.530609       0.036290       0.327090       0.242500       0.398100       0.124800   -9999.000000
54213     54213     neimenggu      119.0197       42.9300           68       196     2012      07        14        196              0.134750      21.775543       0.000000       0.298067       0.221000       0.157500       0.099000       0.683000
54213     54213     neimenggu      119.0197       42.9300           68       196     2012      07        15        197              0.130083      23.164032       0.000000       0.282852   -9999.000000   -9999.000000       0.092800       0.596000
54213     54213     neimenggu      119.0197       42.9300           68       196     2012      07        16        198              0.125125      24.799347       0.000000       0.272844       0.159000   -9999.000000       0.090500       0.496000
54213     54213     neimenggu      119.0197       42.9300           68       196     2012      07        17        199              0.119167      25.933502       0.000000       0.264058       0.130000       0.060400   -9999.000000       0.576000
54213     54213     neimenggu      119.0197       42.9300           68       196     2012      07        18        200              0.114083      26.718719       0.000000       0.255959       0.118000       0.058600       0.078000       0.446000
54213     54213     neimenggu      119.0197       42.9300           68       196     2012      07        19        201              0.110917      26.812469       0.000000       0.249785       0.153500   -9999.000000       0.075700       0.556000
54213     54213     neimenggu      119.0197       42.9300           68       196     2012      07        20        202              0.107958      26.825775       3.223899       0.245958       0.218000       0.061700       0.095700       0.649000
54213     54213     neimenggu      119.0197       42.9300           68       196     2012      07        21        203              0.114667      25.767090      35.923920       0.258900       0.271000   -9999.000000       0.126800   -9999.000000
54213     54213     neimenggu      119.0197       42.9300           68       196     2012      07        22        204              0.145333      23.831024       1.942162       0.307090       0.295000       0.156000       0.126000       0.941000
54213     54213     neimenggu      119.0197       42.9300           68       196     2012      07        23        205              0.137625      21.584320       0.000000       0.311936       0.210000       0.281700       0.103600       0.785000
54213     54213     neimenggu      119.0197       42.9300           68       196     2012      07        24        206              0.132708      24.674652       0.000000       0.286338       0.203500       0.134700       0.098400       0.606000
54213     54213     neimenggu      119.0197       42.9300           68       196     2012      07        25        207              0.128792      25.461426       0.042708       0.276811       0.219000       0.116500       0.091100       0.666000
54213     54213     neimenggu      119.0197       42.9300           68       196     2012      07        26        208              0.131708      25.825592       3.072063       0.269833       0.240000       0.242000       0.096900   -9999.000000
54213     54213     neimenggu      119.0197       42.9300           68       196     2012      07        27        209              0.129458      24.622345       1.226489       0.274501       0.187500       0.147000       0.096400       0.566000
54213     54213     neimenggu      119.0197       42.9300           68       196     2012      07        28        210              0.125833      25.343536       1.956155       0.263359       0.206000       0.256600       0.107800       0.556000
54213     54213     neimenggu      119.0197       42.9300           68       196     2012      07        29        211              0.120208      23.576263       0.066507       0.274767       0.193000       0.106700       0.086200       0.602000
54213     54213     neimenggu      119.0197       42.9300           68       196     2012      07        30        212              0.115125      23.073486       0.044821       0.261272       0.192000       0.128500       0.070000       0.549000
54213     54213     neimenggu      119.0197       42.9300           68       196     2012      07        31        213              0.111833      23.879181       0.116212       0.253588       0.195000       0.137200       0.073100       0.508000
54213     54213     neimenggu      119.0197       42.9300           68       196     2012      08        01        214              0.117917      22.078766      18.457331       0.252763       0.249500   -9999.000000       0.095600       0.515000
54213     54213     neimenggu      119.0197       42.9300           68       196     2012      08        02        215              0.128458      21.289368       0.000000       0.303449       0.201000   -9999.000000       0.083000       0.578000
54213     54213     neimenggu      119.0197       42.9300           68       196     2012      08        03        216              0.124958      22.675232       0.000000       0.285695       0.170000   -9999.000000   -9999.000000       0.512000
54213     54213     neimenggu      119.0197       42.9300           68       196     2012      08        04        217              0.121583      23.590027       0.033419       0.274879       0.197000   -9999.000000       0.069000       0.580000
54213     54213     neimenggu      119.0197       42.9300           68       196     2012      08        05        218              0.116458      24.490387       0.000000       0.266785       0.234000       0.120200       0.065000       0.593000
54213     54213     neimenggu      119.0197       42.9300           68       196     2012      08        06        219              0.111208      26.041626       0.000000       0.257565       0.206000       0.034300       0.090700       0.538000
54213     54213     neimenggu      119.0197       42.9300           68       196     2012      08        07        220              0.106958      25.806000       0.821361       0.250568       0.186000       0.060600   -9999.000000       0.532000
54213     54213     neimenggu      119.0197       42.9300           68       196     2012      08        08        221              0.104000      28.290894       0.069997       0.246077       0.152000       0.178400       0.092500   -9999.000000
54213     54213     neimenggu      119.0197       42.9300           68       196     2012      08        09        222              0.102750      24.036652       0.000000       0.246645       0.179500       0.082500       0.077300       0.448000
54213     54213     neimenggu      119.0197       42.9300           68       196     2012      08        10        223              0.101250      24.035400       2.063425       0.237926       0.194000   -9999.000000       0.078400       0.448000
54213     54213     neimenggu      119.0197       42.9300           68       196     2012      08        11        224              0.098667      24.612640       9.515065       0.237741       0.347000       0.088400       0.101100   -9999.000000
54213     54213     neimenggu      119.0197       42.9300           68       196     2012      08        12        225              0.098250      19.662872       0.488785       0.273431       0.278000       0.356500       0.112500       0.676000
54213     54213     neimenggu      119.0197       42.9300           68       196     2012      08        13        226              0.098500      19.472809       0.628287       0.274112       0.211000       0.212500       0.100600       0.576000
54213     54213     neimenggu      119.0197       42.9300           68       196     2012      08        14        227              0.097458      21.282776       4.161333       0.259176       0.164000       0.152700       0.114000       0.434000
54213     54213     neimenggu      119.0197       42.9300           68       196     2012      08        15        228              0.097458      20.661224       0.000000       0.270758       0.205500   -9999.000000       0.090100       0.512000
54213     54213     neimenggu      119.0197       42.9300           68       196     2012      08        16        229              0.097125      21.572784       0.978849       0.263195       0.231000       0.056400       0.088700       0.436000
54213     54213     neimenggu      119.0197       42.9300           68       196     2012      08        17        230              0.096042      23.744232       0.511238       0.253821       0.208500       0.162200       0.097700       0.521000
54213     54213     neimenggu      119.0197       42.9300           68       196     2012      08        18        231              0.094792      24.301453       0.046657       0.252919       0.211000       0.265700       0.098900       0.550000
54213     54213     neimenggu      119.0197       42.9300           68       196     2012      08        19        232              0.094125      21.739502       0.000000       0.245245       0.173000   -9999.000000       0.104300   -9999.000000
54213     54213     neimenggu      119.0197       42.9300           68       196     2012      08        20        233              0.092167      22.310913       0.254160       0.238791       0.184500       0.113800   -9999.000000       0.444000
54213     54213     neimenggu      119.0197       42.9300           68       196     2012      08        21        234              0.091125      17.379547       0.148517       0.237776       0.215000   -9999.000000       0.088800       0.559000
54213     54213     neimenggu      119.0197       42.9300           68       196     2012      08        22        235              0.091167      17.776489       0.000000       0.234905       0.206000       0.060700       0.090200   -9999.000000
54213     54213     neimenggu      119.0197       42.9300           68       196     2012      08        23        236              0.091333      18.494507       0.000000       0.230576       0.197000       0.124300       0.101100       0.592000
54213     54213     neimenggu      119.0197       42.9300           68       196     2012      08        24        237              0.091083      22.098785       0.000000       0.226242       0.170000       0.039900       0.102100   -9999.000000
54213     54213     neimenggu      119.0197       42.9300           68       196     2012      08        25        238              0.000000      23.196075       0.000000       0.221181       0.178500   -9999.000000       0.103800   -9999.000000
54213     54213     neimenggu      119.0197       42.9300           68       196     2012      08        26        239              0.089583      23.752258       0.000000       0.216770       0.191000       0.118100       0.088800       0.476000
54213     54213     neimenggu      119.0197       42.9300           68       196     2012      08        27        240              0.089042      22.992645      11.663312       0.216616       0.210000       0.034100       0.078400       0.441000
54213     54213     neimenggu      119.0197       42.9300           68       196     2012      08        28        241              0.089083      23.858521       0.041313       0.214521       0.209500       0.399500       0.076000       0.538000
54213     54213     neimenggu      119.0197       42.9300           68       196     2012      08        29        242              0.088417      24.619965       0.000000       0.211758       0.193000       0.024500       0.079800   -9999.000000
54213     54213     neimenggu      119.0197       42.9300           68       196     2012      08        30        243              0.088375      22.396851       0.000000       0.205858       0.169000       0.095000       0.085900       0.443000
54213     54213     neimenggu      119.0197       42.9300           68       196     2012      08        31        244              0.087667      24.857330       0.000000       0.202037       0.172500   -9999.000000       0.087500       0.496000
54213     54213     neimenggu      119.0197       42.9300           68       196     2012      09        01        245              0.086958      24.719177       7.931467       0.198863       0.184000       0.196200       0.074400       0.390000
54213     54213     neimenggu      119.0197       42.9300           68       196     2012      09        02        246              0.111708      24.666290      12.701200       0.218158       0.289000       0.274200       0.121500       0.750000
54213     54213     neimenggu      119.0197       42.9300           68       196     2012      09        03        247              0.121208      14.979218       0.038958       0.297376       0.256500       0.136500       0.103700       0.865000
54213     54213     neimenggu      119.0197       42.9300           68       196     2012      09        04        248              0.117083      15.103546       0.000000       0.269506       0.206000       0.206300       0.086800       0.486000
54213     54213     neimenggu      119.0197       42.9300           68       196     2012      09        05        249              0.114667      14.262543       0.171591       0.260457       0.181000       0.162400       0.089400       0.488000
54213     54213     neimenggu      119.0197       42.9300           68       196     2012      09        06        250              0.111542      18.389587       0.000000       0.253583       0.183000       0.130400       0.069900   -9999.000000
54213     54213     neimenggu      119.0197       42.9300           68       196     2012      09        07        251              0.107833      19.929565       0.000000       0.246953       0.183000   -9999.000000       0.069900       0.416000
54213     54213     neimenggu      119.0197       42.9300           68       196     2012      09        08        252              0.103958      19.658386       0.000000       0.242249       0.174500   -9999.000000       0.077500       0.458000
54213     54213     neimenggu      119.0197       42.9300           68       196     2012      09        09        253              0.100500      19.715668       0.168200       0.238980       0.172000   -9999.000000       0.079300   -9999.000000
54213     54213     neimenggu      119.0197       42.9300           68       196     2012      09        10        254              0.097667      20.932434       0.000000       0.235203       0.141000   -9999.000000       0.082800       0.449000
54213     54213     neimenggu      119.0197       42.9300           68       196     2012      09        11        255              0.094833      21.938507       4.947492       0.231302       0.178500       0.034900       0.104600       0.643000
54213     54213     neimenggu      119.0197       42.9300           68       196     2012      09        12        256              0.092042      18.427856      12.203069       0.250452       0.205000       0.252200       0.083400       0.386000
54213     54213     neimenggu      119.0197       42.9300           68       196     2012      09        13        257              0.091000      12.998505       0.221191       0.253651       0.165500       0.043100       0.084200       0.348000
54213     54213     neimenggu      119.0197       42.9300           68       196     2012      09        14        258              0.090667      13.898010       0.000000       0.247844       0.158500       0.022500       0.079100       0.324000
54213     54213     neimenggu      119.0197       42.9300           68       196     2012      09        15        259              0.090167      14.951416       0.000000       0.243265   -9999.000000       0.280400       0.086700       0.363000
54213     54213     neimenggu      119.0197       42.9300           68       196     2012      09        16        260              0.089250      15.529724       0.000000       0.238905       0.143500       0.048800       0.090400       0.437000
54213     54213     neimenggu      119.0197       42.9300           68       196     2012      09        17        261              0.088375      15.429810       0.000000       0.235870       0.157000       0.157600   -9999.000000   -9999.000000
54213     54213     neimenggu      119.0197       42.9300           68       196     2012      09        18        262              0.087625      15.723999       0.000000       0.233088       0.155000       0.240500       0.063000       0.360000
54213     54213     neimenggu      119.0197       42.9300           68       196     2012      09        19        263              0.086917      16.024445       0.000000       0.230324       0.159500       0.119700       0.072100       0.318000
54213     54213     neimenggu      119.0197       42.9300           68       196     2012      09        20        264              0.086667      16.709351       0.000000       0.228589       0.138000   -9999.000000       0.078500       0.379000
54213     54213     neimenggu      119.0197       42.9300           68       196     2012      09        21        265              0.086000      18.252411       2.815389       0.227281   -9999.000000       0.064900       0.084400       0.584000
54213     54213     neimenggu      119.0197       42.9300           68       196     2012      09        22        266              0.085667      18.108215       0.646306       0.243938       0.135000       0.210300       0.081000   -9999.000000
54213     54213     neimenggu      119.0197       42.9300           68       196     2012      09        23        267              0.085000      18.127960       0.708369       0.243774       0.143000       0.130000       0.072700       0.416000
54213     54213     neimenggu      119.0197       42.9300           68       196     2012      09        24        268              0.084542      17.476440       0.300393       0.242537       0.142000   -9999.000000       0.073400       0.354000
54213     54213     neimenggu      119.0197       42.9300           68       196     2012      09        25        269              0.083583      17.466492      13.199834       0.238943   -9999.000000       0.280200       0.107200       0.650000
54213     54213     neimenggu      119.0197       42.9300           68       196     2012      09        26        270              0.083583      13.818787       0.658386       0.293388       0.134000   -9999.000000       0.083200       0.437000
54213     54213     neimenggu      119.0197       42.9300           68       196     2012      09        27        271              0.083571      14.797577      31.556812       0.271241       0.186000       0.115900       0.124000   -9999.000000
54213     54213     neimenggu      119.0197       42.9300           68       196     2012      09        28        272              0.120000      10.842682       6.568254       0.328016   -9999.000000   -9999.000000       0.134400       0.570000
54213     54213     neimenggu      119.0197       42.9300           68       196     2012      09        29        273              0.117500       8.877197       0.000000       0.316554       0.185000   -9999.000000       0.086100       0.417000
54213     54213     neimenggu      119.0197       42.9300           68       196     2012      09        30        274              0.114542      10.565765       0.000000       0.292622       0.154000   -9999.000000       0.082500       0.552000
54213     54213     neimenggu      119.0197       42.9300           68       196     2012      10        01        275              0.111958      11.919830       0.000000       0.284489       0.106000   -9999.000000       0.074600       0.402000
54213     54213     neimenggu      119.0197       42.9300           68       196     2012      10        02        276              0.109708      13.018066       0.456662       0.278214       0.129000   -9999.000000       0.083000       0.538000
54213     54213     neimenggu      119.0197       42.9300           68       196     2012      10        03        277              0.106708      14.284668       1.460727       0.275807       0.139000       0.377000       0.076400       0.396000
54213     54213     neimenggu      119.0197       42.9300           68       196     2012      10        04        278              0.103792      11.836090       0.000000       0.271098       0.126000       0.061500   -9999.000000       0.337000
54213     54213     neimenggu      119.0197       42.9300           68       196     2012      10        05        279              0.101583      12.005463       0.221098       0.266756       0.128000       0.367200       0.066400   -9999.000000
54213     54213     neimenggu      119.0197       42.9300           68       196     2012      10        06        280              0.100083      10.528595       0.391359       0.263414       0.123000       0.236900       0.067500       0.320000
54213     54213     neimenggu      119.0197       42.9300           68       196     2012      10        07        281              0.098375      12.460571       0.000000       0.261651       0.114000       0.110900       0.077700       0.381000
54213     54213     neimenggu      119.0197       42.9300           68       196     2012      10        08        282              0.096917      13.661438       0.274567       0.259488       0.124500       0.147000       0.079200   -9999.000000
54213     54213     neimenggu      119.0197       42.9300           68       196     2012      10        09        283              0.093958      15.575836       0.305384       0.258550       0.163000       0.075200       0.077400       0.348000
54213     54213     neimenggu      119.0197       42.9300           68       196     2012      10        10        284              0.092000       9.811890       0.397863       0.258862       0.132500       0.254900       0.065000       0.374000
54213     54213     neimenggu      119.0197       42.9300           68       196     2012      10        11        285              0.091167       9.184753       0.370084       0.256732       0.104000       0.043900       0.065400       0.322000
54213     54213     neimenggu      119.0197       42.9300           68       196     2012      10        12        286              0.090750      10.122650       1.821343       0.257036       0.104000       0.074900       0.073000       0.372000
54213     54213     neimenggu      119.0197       42.9300           68       196     2012      10        13        287              0.088750      10.789490       4.344544       0.257522       0.100000   -9999.000000       0.074000       0.181000
54213     54213     neimenggu      119.0197       42.9300           68       196     2012      10        14        288              0.087458       6.716370       3.486716       0.269121   -9999.000000   -9999.000000       0.076100       0.207000
54213     54213     neimenggu      119.0197       42.9300           68       196     2012      10        15        289              0.087625       5.900909       0.568805       0.268606       0.111000       0.091600       0.097600       0.305000
54213     54213     neimenggu      119.0197       42.9300           68       196     2012      10        16        290              0.087417       7.971588       3.272998       0.268849       0.164000       0.233200       0.087200   -9999.000000
54213     54213     neimenggu      119.0197       42.9300           68       196     2012      10        17        291              0.086750       5.444672       4.687290       0.274378       0.121000       0.083500       0.076400       0.321000
54213     54213     neimenggu      119.0197       42.9300           68       196     2012      10        18        292              0.086625       4.686066       1.952946       0.274499       0.105000       0.106600       0.075600       0.237000
54213     54213     neimenggu      119.0197       42.9300           68       196     2012      10        19        293              0.087167       4.475281       0.738924       0.270124       0.113000   -9999.000000       0.077200       0.201000
54213     54213     neimenggu      119.0197       42.9300           68       196     2012      10        20        294              0.086875       7.128845       3.401414       0.271725       0.122000   -9999.000000       0.078200       0.284000
54213     54213     neimenggu      119.0197       42.9300           68       196     2012      10        21        295              0.086000       5.484528      16.033495       0.273104   -9999.000000   -9999.000000   -9999.000000   -9999.000000
54213     54213     neimenggu      119.0197       42.9300           68       196     2012      10        22        296              0.086000       2.531830       7.278226       0.296008   -9999.000000   -9999.000000       0.060500       0.605000
54213     54213     neimenggu      119.0197       42.9300           68       196     2012      10        23        297              0.088000       2.348633       2.793643       0.310883   -9999.000000       0.191800       0.102500       0.648000
54213     54213     neimenggu      119.0197       42.9300           68       196     2012      10        24        298              0.115667       4.602417       5.885166       0.301830   -9999.000000   -9999.000000       0.082200       0.724000
54213     54213     neimenggu      119.0197       42.9300           68       196     2012      10        25        299              0.000000       6.618835       1.338406       0.288173   -9999.000000   -9999.000000       0.085300       0.533000
54213     54213     neimenggu      119.0197       42.9300           68       196     2012      10        26        300              0.123208       8.109467       0.164570       0.284996       0.146000   -9999.000000       0.098500   -9999.000000
54213     54213     neimenggu      119.0197       42.9300           68       196     2012      10        27        301              0.120917       9.973206       1.586066       0.282951       0.132000       0.102900       0.083200       0.483000
54213     54213     neimenggu      119.0197       42.9300           68       196     2012      10        28        302              0.000000       6.600616       3.559517       0.276896       0.111000       0.113900       0.080000       0.330000
54213     54213     neimenggu      119.0197       42.9300           68       196     2012      10        29        303              0.115542       3.998535       1.656026       0.274211   -9999.000000       0.113500       0.074800       0.373000
54213     54213     neimenggu      119.0197       42.9300           68       196     2012      10        30        304              0.114167       1.154755       2.254363       0.233918   -9999.000000       0.094300       0.065400       0.207000
54213     54213     neimenggu      119.0197       42.9300           68       196     2012      10        31        305              0.113250       1.105621       1.571117       0.223658   -9999.000000   -9999.000000       0.073800       0.410000
54213     54213     neimenggu      119.0197       42.9300           68       196     2012      11        01        306              0.113333       0.923035       2.185241       0.221488       0.120000   -9999.000000       0.069500       0.319000
54213     54213     neimenggu      119.0197       42.9300           68       196     2012      11        02        307              0.111875       1.286926       0.300841       0.221079   -9999.000000       0.101900       0.065300       0.236000
54213     54213     neimenggu      119.0197       42.9300           68       196     2012      11        03        308              0.110958      -0.279449       0.184686       0.165888   -9999.000000       0.156400       0.070400   -9999.000000
54213     54213     neimenggu      119.0197       42.9300           68       196     2012      11        04        309              0.111000      -0.118439       0.000000       0.161588   -9999.000000   -9999.000000       0.067000       0.231000
54213     54213     neimenggu      119.0197       42.9300           68       196     2012      11        05        310              0.112000      -0.082764       0.000000       0.158476   -9999.000000   -9999.000000       0.053700       0.340000
54213     54213     neimenggu      119.0197       42.9300           68       196     2012      11        06        311              0.112792      -1.132904       0.000000       0.159514   -9999.000000   -9999.000000       0.054100   -9999.000000
54213     54213     neimenggu      119.0197       42.9300           68       196     2012      11        07        312              0.113000      -3.352600       0.000000       0.124359   -9999.000000       0.137400       0.051300       0.324000
54213     54213     neimenggu      119.0197       42.9300           68       196     2012      11        08        313              0.113167      -1.245178       0.000000       0.141997   -9999.000000   -9999.000000   -9999.000000       0.269000
54213     54213     neimenggu      119.0197       42.9300           68       196     2012      11        09        314              0.114000      -3.318359       0.000000       0.128193   -9999.000000       0.087300       0.053800       0.327000
54213     54213     neimenggu      119.0197       42.9300           68       196     2012      11        10        315              0.114000      -3.602448       0.000000       0.116479   -9999.000000   -9999.000000       0.049000       0.358000
54213     54213     neimenggu      119.0197       42.9300           68       196     2012      11        11        316              0.114042      -1.723480       0.000000       0.124187   -9999.000000   -9999.000000       0.054600       0.398000
54213     54213     neimenggu      119.0197       42.9300           68       196     2012      11        12        317              0.115000      -3.702332       0.000000       0.106972   -9999.000000   -9999.000000       0.050300       0.255000
54213     54213     neimenggu      119.0197       42.9300           68       196     2012      11        13        318              0.000000      -5.363647       0.000000       0.100812   -9999.000000   -9999.000000       0.044300       0.307000
54213     54213     neimenggu      119.0197       42.9300           68       196     2012      11        14        319              0.115000      -5.832703       0.000000       0.098408   -9999.000000   -9999.000000       0.046400   -9999.000000
54213     54213     neimenggu      119.0197       42.9300           68       196     2012      11        15        320              0.115000      -6.235443       0.000000       0.097833   -9999.000000       0.139600       0.046700       0.430000
54213     54213     neimenggu      119.0197       42.9300           68       196     2012      11        16        321              0.115000      -4.236115       0.000000       0.097523   -9999.000000   -9999.000000       0.040500       0.291000
54213     54213     neimenggu      119.0197       42.9300           68       196     2012      11        17        322              0.000000      -4.361603       0.000000       0.105086   -9999.000000       0.080600       0.043800       0.210000
54213     54213     neimenggu      119.0197       42.9300           68       196     2012      11        18        323              0.115000      -6.829132       0.000000       0.097157   -9999.000000   -9999.000000   -9999.000000       0.293000
54213     54213     neimenggu      119.0197       42.9300           68       196     2012      11        19        324              0.114458      -5.242493       0.000000       0.094686   -9999.000000   -9999.000000       0.041500   -9999.000000
54213     54213     neimenggu      119.0197       42.9300           68       196     2012      11        20        325              0.114000      -5.422455       0.000000       0.100801   -9999.000000   -9999.000000       0.042100       0.390000
54213     54213     neimenggu      119.0197       42.9300           68       196     2012      11        21        326              0.114000      -6.064758       0.000000       0.096287   -9999.000000   -9999.000000       0.035600       0.403000
54213     54213     neimenggu      119.0197       42.9300           68       196     2012      11        22        327              0.113583      -5.373322       0.000000       0.101285   -9999.000000   -9999.000000       0.033400       0.412000
54213     54213     neimenggu      119.0197       42.9300           68       196     2012      11        23        328              0.113000      -7.057648       0.000000       0.095505   -9999.000000       0.061000       0.036100       0.338000
54213     54213     neimenggu      119.0197       42.9300           68       196     2012      11        24        329              0.112667      -6.274109       0.000000       0.094775   -9999.000000       0.060200       0.033500       0.475000
54213     54213     neimenggu      119.0197       42.9300           68       196     2012      11        25        330              0.112000      -5.546387       0.000000       0.096070   -9999.000000   -9999.000000       0.033400       0.294000
54213     54213     neimenggu      119.0197       42.9300           68       196     2012      11        26        331              0.111250      -6.444916       0.000000       0.094820   -9999.000000       0.130400       0.035800       0.323000
54213     54213     neimenggu      119.0197       42.9300           68       196     2012      11        27        332              0.110375      -9.307465       0.000000       0.092370   -9999.000000       0.045700       0.033800       0.328000
54213     54213     neimenggu      119.0197       42.9300           68       196     2012      11        28        333              0.109542      -5.904205       0.000000       0.092578   -9999.000000       0.135200       0.032500       0.292000
54213     54213     neimenggu      119.0197       42.9300           68       196     2012      11        29        334              0.107333      -8.029327       0.000000       0.092159   -9999.000000       0.050400       0.032900       0.405000
54213     54213     neimenggu      119.0197       42.9300           68       196     2012      11        30        335              0.100792     -11.027588       0.000000       0.090539   -9999.000000       0.047200       0.026400       0.251000
54213     54213     neimenggu      119.0197       42.9300           68       196     2012      12        01        336              0.093458     -13.574310       0.000000       0.088239   -9999.000000   -9999.000000       0.030700       0.267000
54213     54213     neimenggu      119.0197       42.9300           68       196     2012      12        02        337              0.091917     -12.061310       0.000000       0.086984   -9999.000000   -9999.000000       0.030700   -9999.000000
54213     54213     neimenggu      119.0197       42.9300           68       196     2012      12        03        338              0.090958      -6.578857       0.000000       0.090394   -9999.000000       0.097600       0.025400       0.262000
54213     54213     neimenggu      119.0197       42.9300           68       196     2012      12        04        339              0.088875     -10.012695       0.000000       0.088448   -9999.000000       0.151900       0.024900       0.370000
54213     54213     neimenggu      119.0197       42.9300           68       196     2012      12        05        340              0.087000     -10.816559       0.000000       0.087559   -9999.000000       0.060200   -9999.000000   -9999.000000
54213     54213     neimenggu      119.0197       42.9300           68       196     2012      12        06        341              0.084958     -13.422546       0.000000       0.086932   -9999.000000       0.084000       0.019500       0.194000
54213     54213     neimenggu      119.0197       42.9300           68       196     2012      12        07        342              0.083042     -14.541168       0.000000       0.086251   -9999.000000   -9999.000000       0.021400       0.209000
54213     54213     neimenggu      119.0197       42.9300           68       196     2012      12        08        343              0.081708     -15.539764       0.000000       0.085520   -9999.000000   -9999.000000       0.022100       0.242000
54213     54213     neimenggu      119.0197       42.9300           68       196     2012      12        09        344              0.081208     -15.476318       0.000000       0.085853   -9999.000000   -9999.000000       0.020100       0.307000
54213     54213     neimenggu      119.0197       42.9300           68       196     2012      12        10        345              0.080917     -13.352173       0.000000       0.086273   -9999.000000   -9999.000000       0.019000       0.325000
54213     54213     neimenggu      119.0197       42.9300           68       196     2012      12        11        346              0.080000     -14.550781       0.000000       0.085573   -9999.000000   -9999.000000       0.014700       0.167000
54213     54213     neimenggu      119.0197       42.9300           68       196     2012      12        12        347              0.080000     -13.647552       0.000000       0.085604   -9999.000000   -9999.000000       0.016300       0.222000
54213     54213     neimenggu      119.0197       42.9300           68       196     2012      12        13        348              0.079500     -12.895386       0.636013       0.086112   -9999.000000   -9999.000000       0.015200   -9999.000000
54213     54213     neimenggu      119.0197       42.9300           68       196     2012      12        14        349              0.079250     -11.710632       0.998176       0.086387   -9999.000000   -9999.000000       0.010000       0.248000
54213     54213     neimenggu      119.0197       42.9300           68       196     2012      12        15        350              0.000000     -10.561523       0.000000       0.086529   -9999.000000   -9999.000000       0.010600       0.237000
54213     54213     neimenggu      119.0197       42.9300           68       196     2012      12        16        351              0.079750     -10.285095       0.000000       0.086937   -9999.000000   -9999.000000       0.010000       0.129000
54213     54213     neimenggu      119.0197       42.9300           68       196     2012      12        17        352              0.079000     -10.622314       0.000000       0.087157   -9999.000000   -9999.000000       0.010000       0.208000
54213     54213     neimenggu      119.0197       42.9300           68       196     2012      12        18        353              0.078583     -10.808502       0.000000       0.087319   -9999.000000   -9999.000000       0.010000   -9999.000000
54213     54213     neimenggu      119.0197       42.9300           68       196     2012      12        19        354              0.077500     -12.041748       0.000000       0.087301   -9999.000000   -9999.000000       0.010000       0.226000
54213     54213     neimenggu      119.0197       42.9300           68       196     2012      12        20        355              0.000000     -12.050964       0.759365       0.087235   -9999.000000   -9999.000000       0.010000       0.320000
54213     54213     neimenggu      119.0197       42.9300           68       196     2012      12        21        356              0.077000     -10.496429       0.000000       0.087629   -9999.000000   -9999.000000       0.010000       0.235000
54213     54213     neimenggu      119.0197       42.9300           68       196     2012      12        22        357              0.076958     -10.569672       0.000000       0.088009   -9999.000000   -9999.000000       0.010000       0.188000
54213     54213     neimenggu      119.0197       42.9300           68       196     2012      12        23        358              0.075750     -11.743317       0.000000       0.088042   -9999.000000   -9999.000000   -9999.000000   -9999.000000
54213     54213     neimenggu      119.0197       42.9300           68       196     2012      12        24        359              0.074400     -12.967072       0.000000       0.087781   -9999.000000   -9999.000000       0.010000       0.225000
54213     54213     neimenggu      119.0197       42.9300           68       196     2012      12        25        360              0.074000     -12.683044       0.000000       0.087646   -9999.000000   -9999.000000       0.010000       0.226000
54213     54213     neimenggu      119.0197       42.9300           68       196     2012      12        26        361              0.000000     -13.496094       0.000000       0.087654   -9999.000000   -9999.000000       0.010000       0.239000
54213     54213     neimenggu      119.0197       42.9300           68       196     2012      12        27        362              0.073077     -13.810669       0.000000       0.087291   -9999.000000   -9999.000000       0.010000       0.204000
54213     54213     neimenggu      119.0197       42.9300           68       196     2012      12        28        363              0.000000     -14.041656       1.919303       0.086661   -9999.000000   -9999.000000       0.010000       0.365000
54213     54213     neimenggu      119.0197       42.9300           68       196     2012      12        29        364              0.000000     -12.456299       0.000000       0.086073   -9999.000000   -9999.000000   -9999.000000       0.159000
54213     54213     neimenggu      119.0197       42.9300           68       196     2012      12        30        365              0.000000     -10.791870       0.000000       0.086394   -9999.000000   -9999.000000       0.010000       0.231000
54213     54213     neimenggu      119.0197       42.9300           68       196     2012      12        31        366              0.073000     -10.502441       0.000000       0.086509   -9999.000000   -9999.000000       0.010000   -9999.000000
