# Supplementary material for: Research on Fusing Multisatellite Soil Moisture Data Based on Bayesian Model Averaging
Source: Hindawi journal article supplement (doi:10.1155/2018/9310838), 2018-06-25
Supplement: f1 [file 9310838.f1.zip › 2012_sm00-10cm_daily_ZDB_ZHY_54218_366days_allin.txt]

54218     54218     neimenggu      118.9300       42.2700           71       196     2012      01        01        001              0.000000   -9999.000000       0.000000   -9999.000000   -9999.000000   -9999.000000       0.063400   -9999.000000
54218     54218     neimenggu      118.9300       42.2700           71       196     2012      01        02        002              0.154208      -6.742523       0.000000       0.120049   -9999.000000   -9999.000000       0.049700       0.230000
54218     54218     neimenggu      118.9300       42.2700           71       196     2012      01        03        003              0.000000      -6.279144       0.000000       0.120312   -9999.000000   -9999.000000       0.055500       0.045000
54218     54218     neimenggu      118.9300       42.2700           71       196     2012      01        04        004              0.153417      -6.436554       0.000000       0.120567   -9999.000000   -9999.000000       0.058800       0.271000
54218     54218     neimenggu      118.9300       42.2700           71       196     2012      01        05        005              0.153500      -6.808990       0.000000       0.120812   -9999.000000   -9999.000000       0.057400   -9999.000000
54218     54218     neimenggu      118.9300       42.2700           71       196     2012      01        06        006              0.152667      -7.037140       0.000000       0.121833   -9999.000000   -9999.000000       0.072400       0.167000
54218     54218     neimenggu      118.9300       42.2700           71       196     2012      01        07        007              0.152458      -8.180756       0.000000       0.121766   -9999.000000   -9999.000000       0.068100       0.147000
54218     54218     neimenggu      118.9300       42.2700           71       196     2012      01        08        008              0.000000      -8.581055       0.000000       0.121673   -9999.000000   -9999.000000       0.050000       0.068000
54218     54218     neimenggu      118.9300       42.2700           71       196     2012      01        09        009              0.152708      -8.430389       0.000000       0.121726   -9999.000000   -9999.000000       0.059700       0.297000
54218     54218     neimenggu      118.9300       42.2700           71       196     2012      01        10        010              0.152708      -8.891418       0.000000       0.121432   -9999.000000   -9999.000000       0.067500   -9999.000000
54218     54218     neimenggu      118.9300       42.2700           71       196     2012      01        11        011              0.152875      -8.956635       0.000000       0.121450   -9999.000000   -9999.000000       0.062800       0.210000
54218     54218     neimenggu      118.9300       42.2700           71       196     2012      01        12        012              0.153750      -8.536499       0.000000       0.120924   -9999.000000   -9999.000000       0.066400       0.238000
54218     54218     neimenggu      118.9300       42.2700           71       196     2012      01        13        013              0.153500      -7.830597       0.000000       0.123005   -9999.000000   -9999.000000       0.049300       0.174000
54218     54218     neimenggu      118.9300       42.2700           71       196     2012      01        14        014              0.153333      -7.624664       0.000000       0.118567   -9999.000000   -9999.000000       0.051800       0.282000
54218     54218     neimenggu      118.9300       42.2700           71       196     2012      01        15        015              0.153333      -8.569000       0.000000       0.118531   -9999.000000   -9999.000000       0.058700       0.071000
54218     54218     neimenggu      118.9300       42.2700           71       196     2012      01        16        016              0.153667      -7.716827       0.000000       0.115539   -9999.000000   -9999.000000       0.063000       0.217000
54218     54218     neimenggu      118.9300       42.2700           71       196     2012      01        17        017              0.000000      -8.225800       0.000000       0.115306   -9999.000000   -9999.000000       0.061700       0.292000
54218     54218     neimenggu      118.9300       42.2700           71       196     2012      01        18        018              0.152792     -10.915344       0.000000       0.110846   -9999.000000   -9999.000000       0.069700   -9999.000000
54218     54218     neimenggu      118.9300       42.2700           71       196     2012      01        19        019              0.152667      -8.956329       0.000000       0.112629   -9999.000000   -9999.000000       0.047700       0.180000
54218     54218     neimenggu      118.9300       42.2700           71       196     2012      01        20        020              0.152083     -10.130798       0.000000       0.109756   -9999.000000   -9999.000000       0.053800       0.189000
54218     54218     neimenggu      118.9300       42.2700           71       196     2012      01        21        021              0.151250     -13.885529       0.000000       0.108203   -9999.000000   -9999.000000       0.059700   -9999.000000
54218     54218     neimenggu      118.9300       42.2700           71       196     2012      01        22        022              0.150875     -14.839691       0.000000       0.106813   -9999.000000   -9999.000000       0.063300       0.162000
54218     54218     neimenggu      118.9300       42.2700           71       196     2012      01        23        023              0.151042     -15.317688       0.000000       0.106498   -9999.000000   -9999.000000       0.072900       0.182000
54218     54218     neimenggu      118.9300       42.2700           71       196     2012      01        24        024              0.150917     -14.132477       0.000000       0.106276   -9999.000000   -9999.000000   -9999.000000       0.093000
54218     54218     neimenggu      118.9300       42.2700           71       196     2012      01        25        025              0.151250     -14.469452       0.000000       0.106185   -9999.000000   -9999.000000       0.053600       0.230000
54218     54218     neimenggu      118.9300       42.2700           71       196     2012      01        26        026              0.151250     -12.658997       0.000000       0.106040   -9999.000000   -9999.000000       0.062600       0.044000
54218     54218     neimenggu      118.9300       42.2700           71       196     2012      01        27        027              0.151083     -12.355316       0.000000       0.105646   -9999.000000   -9999.000000       0.070600       0.172000
54218     54218     neimenggu      118.9300       42.2700           71       196     2012      01        28        028              0.151083     -12.529022       0.000000       0.105040   -9999.000000   -9999.000000       0.060100       0.303000
54218     54218     neimenggu      118.9300       42.2700           71       196     2012      01        29        029              0.150750     -12.367340       0.000000       0.104680   -9999.000000   -9999.000000       0.073400   -9999.000000
54218     54218     neimenggu      118.9300       42.2700           71       196     2012      01        30        030              0.150583     -14.246796       0.000000       0.103897   -9999.000000   -9999.000000       0.053100       0.071000
54218     54218     neimenggu      118.9300       42.2700           71       196     2012      01        31        031              0.150542     -13.762238       0.000000       0.103730   -9999.000000   -9999.000000       0.055700       0.146000
54218     54218     neimenggu      118.9300       42.2700           71       196     2012      02        01        032              0.150292     -14.738617       0.000000       0.103831   -9999.000000   -9999.000000   -9999.000000       0.078000
54218     54218     neimenggu      118.9300       42.2700           71       196     2012      02        02        033              0.150458     -16.041687       0.000000       0.103422   -9999.000000   -9999.000000       0.068900       0.227000
54218     54218     neimenggu      118.9300       42.2700           71       196     2012      02        03        034              0.150917     -13.858734       0.062288       0.103253   -9999.000000   -9999.000000       0.068400   -9999.000000
54218     54218     neimenggu      118.9300       42.2700           71       196     2012      02        04        035              0.151875     -11.584991       0.000000       0.103772   -9999.000000   -9999.000000       0.073300       0.300000
54218     54218     neimenggu      118.9300       42.2700           71       196     2012      02        05        036              0.152792      -8.135834       0.000000       0.109280   -9999.000000   -9999.000000       0.052500       0.200000
54218     54218     neimenggu      118.9300       42.2700           71       196     2012      02        06        037              0.151042      -6.529663       0.000000       0.128582   -9999.000000   -9999.000000       0.056400       0.050000
54218     54218     neimenggu      118.9300       42.2700           71       196     2012      02        07        038              0.150750     -13.317017       0.000000       0.113903   -9999.000000   -9999.000000       0.061600       0.142000
54218     54218     neimenggu      118.9300       42.2700           71       196     2012      02        08        039              0.150917     -12.946564       0.000000       0.111553   -9999.000000   -9999.000000       0.067600   -9999.000000
54218     54218     neimenggu      118.9300       42.2700           71       196     2012      02        09        040              0.151292     -11.263397       0.000000       0.111728   -9999.000000   -9999.000000       0.070600       0.132000
54218     54218     neimenggu      118.9300       42.2700           71       196     2012      02        10        041              0.151375      -9.733398       0.000000       0.114884   -9999.000000   -9999.000000   -9999.000000       0.296000
54218     54218     neimenggu      118.9300       42.2700           71       196     2012      02        11        042              0.151458      -9.358276       0.000000       0.113644   -9999.000000   -9999.000000       0.052200       0.099000
54218     54218     neimenggu      118.9300       42.2700           71       196     2012      02        12        043              0.151958      -9.279388       0.000000       0.117404   -9999.000000   -9999.000000       0.062500       0.248000
54218     54218     neimenggu      118.9300       42.2700           71       196     2012      02        13        044              0.152750      -5.330322       0.000000       0.133017   -9999.000000   -9999.000000       0.071300       0.031000
54218     54218     neimenggu      118.9300       42.2700           71       196     2012      02        14        045              0.151917      -3.290833       0.048070       0.150077   -9999.000000   -9999.000000       0.068500       0.070000
54218     54218     neimenggu      118.9300       42.2700           71       196     2012      02        15        046              0.151583      -7.773590       0.000000       0.125953   -9999.000000   -9999.000000       0.076200       0.236000
54218     54218     neimenggu      118.9300       42.2700           71       196     2012      02        16        047              0.151125      -7.493683       0.000000       0.128640   -9999.000000   -9999.000000       0.053600   -9999.000000
54218     54218     neimenggu      118.9300       42.2700           71       196     2012      02        17        048              0.150833      -9.846771       0.000000       0.116153   -9999.000000   -9999.000000       0.057200       0.159000
54218     54218     neimenggu      118.9300       42.2700           71       196     2012      02        18        049              0.151417     -10.695831       0.000000       0.114422   -9999.000000   -9999.000000   -9999.000000       0.136000
54218     54218     neimenggu      118.9300       42.2700           71       196     2012      02        19        050              0.152125      -7.224762       0.000000       0.125570       0.097000   -9999.000000       0.065100   -9999.000000
54218     54218     neimenggu      118.9300       42.2700           71       196     2012      02        20        051              0.151625      -4.786102       0.000000       0.148720       0.096000   -9999.000000       0.062700       0.312000
54218     54218     neimenggu      118.9300       42.2700           71       196     2012      02        21        052              0.151542      -7.816772       0.000000       0.130276   -9999.000000   -9999.000000       0.073600       0.311000
54218     54218     neimenggu      118.9300       42.2700           71       196     2012      02        22        053              0.151417      -6.373749       0.000000       0.131762   -9999.000000   -9999.000000       0.053900       0.124000
54218     54218     neimenggu      118.9300       42.2700           71       196     2012      02        23        054              0.151708      -8.432251       1.386330       0.119704   -9999.000000   -9999.000000       0.058000       0.079000
54218     54218     neimenggu      118.9300       42.2700           71       196     2012      02        24        055              0.152208      -5.314758       0.000000       0.137289   -9999.000000   -9999.000000       0.060400       0.199000
54218     54218     neimenggu      118.9300       42.2700           71       196     2012      02        25        056              0.151833      -5.956421       0.000000       0.136662   -9999.000000   -9999.000000       0.052900       0.222000
54218     54218     neimenggu      118.9300       42.2700           71       196     2012      02        26        057              0.152167      -7.542023       0.000000       0.126802   -9999.000000       0.055500       0.065400       0.278000
54218     54218     neimenggu      118.9300       42.2700           71       196     2012      02        27        058              0.152792      -6.497955       0.000000       0.135417       0.085000       0.121700   -9999.000000   -9999.000000
54218     54218     neimenggu      118.9300       42.2700           71       196     2012      02        28        059              0.153750      -2.906952       0.000000       0.153767   -9999.000000   -9999.000000       0.056000       0.284000
54218     54218     neimenggu      118.9300       42.2700           71       196     2012      02        29        060              0.000000   -9999.000000       0.000000   -9999.000000   -9999.000000       0.144700   -9999.000000   -9999.000000
54218     54218     neimenggu      118.9300       42.2700           71       196     2012      03        01        061              0.154750       0.825989       0.250183       0.183458   -9999.000000       0.058800       0.059600       0.207000
54218     54218     neimenggu      118.9300       42.2700           71       196     2012      03        02        062              0.154208      -3.717377       0.000000       0.157055       0.079000       0.053500       0.055900       0.228000
54218     54218     neimenggu      118.9300       42.2700           71       196     2012      03        03        063              0.154542      -5.340424       0.000000       0.141708   -9999.000000       0.024500       0.064700   -9999.000000
54218     54218     neimenggu      118.9300       42.2700           71       196     2012      03        04        064              0.155875      -2.184052       0.158847       0.155262   -9999.000000   -9999.000000       0.057900       0.292000
54218     54218     neimenggu      118.9300       42.2700           71       196     2012      03        05        065              0.155917       0.579376       0.231692       0.180063   -9999.000000   -9999.000000       0.051600       0.246000
54218     54218     neimenggu      118.9300       42.2700           71       196     2012      03        06        066              0.155708      -2.050873       0.553601       0.159399   -9999.000000   -9999.000000       0.054300       0.240000
54218     54218     neimenggu      118.9300       42.2700           71       196     2012      03        07        067              0.000000      -3.676971       0.483797       0.154439   -9999.000000   -9999.000000       0.047400       0.270000
54218     54218     neimenggu      118.9300       42.2700           71       196     2012      03        08        068              0.154792      -4.168488       0.000000       0.152828   -9999.000000   -9999.000000       0.050900   -9999.000000
54218     54218     neimenggu      118.9300       42.2700           71       196     2012      03        09        069              0.155542      -6.558105       0.000000       0.134502   -9999.000000       0.183400       0.059000       0.127000
54218     54218     neimenggu      118.9300       42.2700           71       196     2012      03        10        070              0.154625      -3.554413       0.000000       0.144822   -9999.000000       0.075600       0.038400       0.162000
54218     54218     neimenggu      118.9300       42.2700           71       196     2012      03        11        071              0.154917      -7.331512       0.000000       0.126503   -9999.000000   -9999.000000       0.054500       0.146000
54218     54218     neimenggu      118.9300       42.2700           71       196     2012      03        12        072              0.156167      -5.361877       0.000000       0.139603       0.102000       0.036900       0.059000       0.279000
54218     54218     neimenggu      118.9300       42.2700           71       196     2012      03        13        073              0.158000      -2.275787       0.000000       0.159755       0.092000       0.055700       0.059300       0.224000
54218     54218     neimenggu      118.9300       42.2700           71       196     2012      03        14        074              0.159375       0.583527       0.000000       0.176665       0.090000   -9999.000000       0.061900       0.287000
54218     54218     neimenggu      118.9300       42.2700           71       196     2012      03        15        075              0.161739       1.704834       4.843198       0.180119   -9999.000000       0.058700   -9999.000000       0.498000
54218     54218     neimenggu      118.9300       42.2700           71       196     2012      03        16        076              0.163750       4.703217       0.000000       0.213218       0.110000   -9999.000000       0.057800   -9999.000000
54218     54218     neimenggu      118.9300       42.2700           71       196     2012      03        17        077              0.162292       6.235809       0.000000       0.197126   -9999.000000   -9999.000000       0.057100       0.273000
54218     54218     neimenggu      118.9300       42.2700           71       196     2012      03        18        078              0.161583      -2.476379       0.634354       0.161727       0.104000   -9999.000000       0.055200       0.215000
54218     54218     neimenggu      118.9300       42.2700           71       196     2012      03        19        079              0.162667      -2.807465       0.000000       0.152171       0.099000       0.071700       0.063300   -9999.000000
54218     54218     neimenggu      118.9300       42.2700           71       196     2012      03        20        080              0.164667       0.985016       0.000000       0.173687   -9999.000000   -9999.000000       0.073300       0.248000
54218     54218     neimenggu      118.9300       42.2700           71       196     2012      03        21        081              0.165783       3.364563       0.000000       0.184706   -9999.000000   -9999.000000       0.061700       0.322000
54218     54218     neimenggu      118.9300       42.2700           71       196     2012      03        22        082              0.167083       4.785400       0.198187       0.191569       0.105000   -9999.000000       0.060600       0.328000
54218     54218     neimenggu      118.9300       42.2700           71       196     2012      03        23        083              0.166917       4.274628       0.624029       0.194821       0.095000   -9999.000000       0.065200       0.340000
54218     54218     neimenggu      118.9300       42.2700           71       196     2012      03        24        084              0.166208       2.548248       0.577738       0.186637       0.089000   -9999.000000   -9999.000000       0.106000
54218     54218     neimenggu      118.9300       42.2700           71       196     2012      03        25        085              0.000000       1.553558       0.964474       0.175769   -9999.000000   -9999.000000       0.060200       0.416000
54218     54218     neimenggu      118.9300       42.2700           71       196     2012      03        26        086              0.168958       3.053558       1.182498       0.180349   -9999.000000       0.005900       0.071400   -9999.000000
54218     54218     neimenggu      118.9300       42.2700           71       196     2012      03        27        087              0.170125       7.337769       0.000000       0.192833       0.092000   -9999.000000       0.053100   -9999.000000
54218     54218     neimenggu      118.9300       42.2700           71       196     2012      03        28        088              0.171000       8.486725       0.000000       0.187383       0.094000   -9999.000000       0.062100       0.394000
54218     54218     neimenggu      118.9300       42.2700           71       196     2012      03        29        089              0.169833      12.204651       0.000000       0.186909       0.078000   -9999.000000       0.061800       0.215000
54218     54218     neimenggu      118.9300       42.2700           71       196     2012      03        30        090              0.167542       7.848785       0.000000       0.176658       0.084000   -9999.000000       0.061100       0.304000
54218     54218     neimenggu      118.9300       42.2700           71       196     2012      03        31        091              0.166458       2.987488       0.000000       0.167090   -9999.000000       0.042700       0.068700       0.397000
54218     54218     neimenggu      118.9300       42.2700           71       196     2012      04        01        092              0.167000       2.014832       0.139925       0.163571       0.097000   -9999.000000       0.051800   -9999.000000
54218     54218     neimenggu      118.9300       42.2700           71       196     2012      04        02        093              0.167083       3.871155       0.000000       0.171421       0.093000       0.057800       0.053900       0.450000
54218     54218     neimenggu      118.9300       42.2700           71       196     2012      04        03        094              0.167292       4.030457       0.000000       0.170917       0.077000   -9999.000000       0.061200       0.247000
54218     54218     neimenggu      118.9300       42.2700           71       196     2012      04        04        095              0.167000       6.474060       0.000000       0.178986       0.072000   -9999.000000       0.062700       0.219000
54218     54218     neimenggu      118.9300       42.2700           71       196     2012      04        05        096              0.166208       5.523071       0.543060       0.170903   -9999.000000       0.082500       0.062200       0.329000
54218     54218     neimenggu      118.9300       42.2700           71       196     2012      04        06        097              0.166417       4.926788       0.000000       0.169765       0.094000   -9999.000000       0.066500   -9999.000000
54218     54218     neimenggu      118.9300       42.2700           71       196     2012      04        07        098              0.168083       6.351074       0.529111       0.171960       0.094000       0.011700       0.054900       0.331000
54218     54218     neimenggu      118.9300       42.2700           71       196     2012      04        08        099              0.167375      13.354614       0.000000       0.171167       0.073000   -9999.000000       0.053700       0.368000
54218     54218     neimenggu      118.9300       42.2700           71       196     2012      04        09        100              0.168583      10.642578       0.000000       0.167772       0.082000   -9999.000000       0.063900       0.175000
54218     54218     neimenggu      118.9300       42.2700           71       196     2012      04        10        101              0.166750      16.557404       3.368769       0.162901   -9999.000000   -9999.000000       0.057600       0.342000
54218     54218     neimenggu      118.9300       42.2700           71       196     2012      04        11        102              0.166500      10.219482       0.000000       0.174056   -9999.000000   -9999.000000       0.077500       0.202000
54218     54218     neimenggu      118.9300       42.2700           71       196     2012      04        12        103              0.166958      11.146301       0.000000       0.173478       0.092000   -9999.000000       0.078200       0.319000
54218     54218     neimenggu      118.9300       42.2700           71       196     2012      04        13        104              0.167125      13.209412       0.000000       0.166211       0.076000   -9999.000000       0.054600       0.327000
54218     54218     neimenggu      118.9300       42.2700           71       196     2012      04        14        105              0.167083      16.376099       0.236239       0.159653       0.079500   -9999.000000       0.062500   -9999.000000
54218     54218     neimenggu      118.9300       42.2700           71       196     2012      04        15        106              0.164875      17.136078       0.000000       0.155365   -9999.000000   -9999.000000       0.083300       0.612000
54218     54218     neimenggu      118.9300       42.2700           71       196     2012      04        16        107              0.165792       9.810852       0.000000       0.156233       0.076000   -9999.000000       0.064700       0.219000
54218     54218     neimenggu      118.9300       42.2700           71       196     2012      04        17        108              0.166875      13.756042       0.000000       0.155550       0.076500   -9999.000000   -9999.000000   -9999.000000
54218     54218     neimenggu      118.9300       42.2700           71       196     2012      04        18        109              0.166875      18.723450       0.000000       0.152413       0.081000   -9999.000000   -9999.000000       0.377000
54218     54218     neimenggu      118.9300       42.2700           71       196     2012      04        19        110              0.165917      20.228210       0.331728       0.150836       0.077000   -9999.000000       0.063000       0.427000
54218     54218     neimenggu      118.9300       42.2700           71       196     2012      04        20        111              0.166542      17.024445       0.000000       0.154103       0.082000       0.079300   -9999.000000       0.347000
54218     54218     neimenggu      118.9300       42.2700           71       196     2012      04        21        112              0.166792      17.547821       0.000000       0.153956       0.092000   -9999.000000       0.076800       0.315000
54218     54218     neimenggu      118.9300       42.2700           71       196     2012      04        22        113              0.167417      17.061584       0.000000       0.153390       0.081000   -9999.000000       0.072500       0.450000
54218     54218     neimenggu      118.9300       42.2700           71       196     2012      04        23        114              0.167542      20.108368       3.530810       0.150943       0.084000       0.049200       0.090400       0.366000
54218     54218     neimenggu      118.9300       42.2700           71       196     2012      04        24        115              0.203292      21.400116      39.041992       0.161404   -9999.000000   -9999.000000       0.109000       1.000000
54218     54218     neimenggu      118.9300       42.2700           71       196     2012      04        25        116              0.000000      12.024811       0.000000       0.336521       0.119000   -9999.000000       0.108100   -9999.000000
54218     54218     neimenggu      118.9300       42.2700           71       196     2012      04        26        117              0.218125      10.778503       0.500732       0.296424       0.108000       0.225500       0.080900       0.608000
54218     54218     neimenggu      118.9300       42.2700           71       196     2012      04        27        118              0.214042      14.762726       0.247510       0.277150       0.109000   -9999.000000   -9999.000000       0.319000
54218     54218     neimenggu      118.9300       42.2700           71       196     2012      04        28        119              0.212542       9.614014       0.000000       0.266109       0.083000   -9999.000000       0.077200       0.242000
54218     54218     neimenggu      118.9300       42.2700           71       196     2012      04        29        120              0.214000      11.983215       0.000000       0.257122       0.068000   -9999.000000       0.077300       0.498000
54218     54218     neimenggu      118.9300       42.2700           71       196     2012      04        30        121              0.213125      17.625671       0.293262       0.245139       0.079000   -9999.000000       0.061500   -9999.000000
54218     54218     neimenggu      118.9300       42.2700           71       196     2012      05        01        122              0.213875      18.086029       2.096098       0.238009       0.132000       0.062100       0.063000       0.165000
54218     54218     neimenggu      118.9300       42.2700           71       196     2012      05        02        123              0.214042      18.873993       0.000000       0.235969       0.084000       0.270000       0.074600       0.243000
54218     54218     neimenggu      118.9300       42.2700           71       196     2012      05        03        124              0.214375      19.770630       0.230489       0.234596       0.073500   -9999.000000       0.065100       0.296000
54218     54218     neimenggu      118.9300       42.2700           71       196     2012      05        04        125              0.213125      22.438171       0.000000       0.216506       0.076000   -9999.000000       0.070800       0.341000
54218     54218     neimenggu      118.9300       42.2700           71       196     2012      05        05        126              0.211500      20.421234       0.000000       0.202315       0.071000   -9999.000000       0.052400   -9999.000000
54218     54218     neimenggu      118.9300       42.2700           71       196     2012      05        06        127              0.210417      19.528168       0.000000       0.192522       0.071000   -9999.000000       0.052800       0.137000
54218     54218     neimenggu      118.9300       42.2700           71       196     2012      05        07        128              0.207625      20.030518       0.528886       0.184705   -9999.000000   -9999.000000       0.064100       0.343000
54218     54218     neimenggu      118.9300       42.2700           71       196     2012      05        08        129              0.208125      17.490753       4.230791       0.190752       0.075500       0.052300       0.062800       0.256000
54218     54218     neimenggu      118.9300       42.2700           71       196     2012      05        09        130              0.209125      19.881378       0.139448       0.183054       0.078000   -9999.000000       0.069400       0.298000
54218     54218     neimenggu      118.9300       42.2700           71       196     2012      05        10        131              0.208708      23.127350       0.290427       0.174947       0.062000   -9999.000000       0.072700       0.071000
54218     54218     neimenggu      118.9300       42.2700           71       196     2012      05        11        132              0.215875      22.516052      11.278841       0.171167       0.168000       0.073600       0.109500       0.444000
54218     54218     neimenggu      118.9300       42.2700           71       196     2012      05        12        133              0.219125      14.287537       1.591729       0.272482   -9999.000000   -9999.000000       0.091400       0.636000
54218     54218     neimenggu      118.9300       42.2700           71       196     2012      05        13        134              0.216833      13.682831       2.528707       0.264367   -9999.000000       0.154600       0.119700   -9999.000000
54218     54218     neimenggu      118.9300       42.2700           71       196     2012      05        14        135              0.215417      13.004242       0.000000       0.263991       0.088000   -9999.000000       0.080500       0.434000
54218     54218     neimenggu      118.9300       42.2700           71       196     2012      05        15        136              0.214167      13.270477       0.066510       0.246130       0.104000       0.138600       0.078200       0.560000
54218     54218     neimenggu      118.9300       42.2700           71       196     2012      05        16        137              0.211833      14.053986       0.948089       0.235082       0.076000   -9999.000000   -9999.000000   -9999.000000
54218     54218     neimenggu      118.9300       42.2700           71       196     2012      05        17        138              0.215250      12.826447       0.000000       0.238359       0.087000   -9999.000000       0.057700       0.377000
54218     54218     neimenggu      118.9300       42.2700           71       196     2012      05        18        139              0.216042      20.460388       0.000000       0.222203       0.078000   -9999.000000       0.062700       0.411000
54218     54218     neimenggu      118.9300       42.2700           71       196     2012      05        19        140              0.214000      23.540649       0.034593       0.204288       0.089500   -9999.000000       0.074600       0.280000
54218     54218     neimenggu      118.9300       42.2700           71       196     2012      05        20        141              0.213583      20.382629       0.139157       0.194484       0.068000       0.222400       0.070900       0.234000
54218     54218     neimenggu      118.9300       42.2700           71       196     2012      05        21        142              0.213625      23.232208       0.065442       0.188559       0.081000       0.031500       0.083500       0.238000
54218     54218     neimenggu      118.9300       42.2700           71       196     2012      05        22        143              0.211083      24.398804       0.614570       0.179860       0.081000   -9999.000000       0.056800       0.282000
54218     54218     neimenggu      118.9300       42.2700           71       196     2012      05        23        144              0.211167      20.643799       0.000000       0.174458   -9999.000000   -9999.000000       0.056100       0.456000
54218     54218     neimenggu      118.9300       42.2700           71       196     2012      05        24        145              0.209958      20.760925       0.000000       0.168139       0.084000   -9999.000000       0.059100   -9999.000000
54218     54218     neimenggu      118.9300       42.2700           71       196     2012      05        25        146              0.000000      20.553833       0.000000       0.164304       0.084000   -9999.000000       0.061500       0.177000
54218     54218     neimenggu      118.9300       42.2700           71       196     2012      05        26        147              0.208333      22.763153       0.424852       0.160727       0.053000   -9999.000000       0.068500       0.334000
54218     54218     neimenggu      118.9300       42.2700           71       196     2012      05        27        148              0.207750      23.180145       0.000000       0.159788       0.072500   -9999.000000       0.073900       0.289000
54218     54218     neimenggu      118.9300       42.2700           71       196     2012      05        28        149              0.207042      24.806976       0.069993       0.160135       0.072000       0.097700       0.055700       0.493000
54218     54218     neimenggu      118.9300       42.2700           71       196     2012      05        29        150              0.204667      27.779358       9.046636       0.156027       0.120500       0.070300       0.060800   -9999.000000
54218     54218     neimenggu      118.9300       42.2700           71       196     2012      05        30        151              0.206250      21.247986       0.000000       0.216812       0.091000   -9999.000000       0.063600   -9999.000000
54218     54218     neimenggu      118.9300       42.2700           71       196     2012      05        31        152              0.208292      18.605652       0.091330       0.231822       0.063000       0.072100   -9999.000000   -9999.000000
54218     54218     neimenggu      118.9300       42.2700           71       196     2012      06        01        153              0.207250      21.884216       4.978617       0.205517       0.120500       0.142900       0.095800       0.233000
54218     54218     neimenggu      118.9300       42.2700           71       196     2012      06        02        154              0.206583      19.991302       1.541029       0.231487       0.143000   -9999.000000   -9999.000000       0.489000
54218     54218     neimenggu      118.9300       42.2700           71       196     2012      06        03        155              0.204958      18.780731       1.214449       0.231850       0.117500   -9999.000000       0.081200   -9999.000000
54218     54218     neimenggu      118.9300       42.2700           71       196     2012      06        04        156              0.204958      19.301849       1.373471       0.239305       0.107500   -9999.000000       0.058600       0.287000
54218     54218     neimenggu      118.9300       42.2700           71       196     2012      06        05        157              0.206167      20.563354       1.042347       0.228399       0.077000   -9999.000000       0.071000       0.442000
54218     54218     neimenggu      118.9300       42.2700           71       196     2012      06        06        158              0.203458      23.837433       0.000000       0.216423       0.097000       0.063400       0.068900       0.256000
54218     54218     neimenggu      118.9300       42.2700           71       196     2012      06        07        159              0.204167      22.454803       0.000000       0.203219       0.095000   -9999.000000       0.073600       0.465000
54218     54218     neimenggu      118.9300       42.2700           71       196     2012      06        08        160              0.202708      24.806030       1.188528       0.186474       0.129000       0.129200       0.058800       0.225000
54218     54218     neimenggu      118.9300       42.2700           71       196     2012      06        09        161              0.200292      25.448792       1.919656       0.186236   -9999.000000   -9999.000000       0.075300       0.377000
54218     54218     neimenggu      118.9300       42.2700           71       196     2012      06        10        162              0.198833      22.237396       0.416758       0.198804       0.074000   -9999.000000       0.064600       0.436000
54218     54218     neimenggu      118.9300       42.2700           71       196     2012      06        11        163              0.000000      20.639832       1.940530       0.187527       0.067000       0.151700       0.099600   -9999.000000
54218     54218     neimenggu      118.9300       42.2700           71       196     2012      06        12        164              0.196833      18.219818       0.919125       0.197374       0.125000   -9999.000000       0.074100       0.588000
54218     54218     neimenggu      118.9300       42.2700           71       196     2012      06        13        165              0.221208      19.579163      48.494259       0.204851       0.218000   -9999.000000       0.145400       0.451000
54218     54218     neimenggu      118.9300       42.2700           71       196     2012      06        14        166              0.240947      16.475464      48.676785       0.330315       0.218000   -9999.000000       0.121400   -9999.000000
54218     54218     neimenggu      118.9300       42.2700           71       196     2012      06        15        167              0.000000      16.138550       6.200005       0.372229       0.206000   -9999.000000       0.152900       0.998000
54218     54218     neimenggu      118.9300       42.2700           71       196     2012      06        16        168              0.000000      17.032959       0.569907       0.349624       0.152000   -9999.000000       0.131300       0.851000
54218     54218     neimenggu      118.9300       42.2700           71       196     2012      06        17        169              0.000000      22.520477       0.812865       0.323913       0.152000       0.267200       0.117400       0.816000
54218     54218     neimenggu      118.9300       42.2700           71       196     2012      06        18        170              0.000000      23.160645       0.000000       0.313816       0.151000       0.251600       0.110900       0.750000
54218     54218     neimenggu      118.9300       42.2700           71       196     2012      06        19        171              0.000000      25.068268       0.878237       0.301802       0.125500       0.329700       0.079800   -9999.000000
54218     54218     neimenggu      118.9300       42.2700           71       196     2012      06        20        172              0.231619      25.211945       1.834465       0.295444       0.109000       0.158500       0.088800       0.785000
54218     54218     neimenggu      118.9300       42.2700           71       196     2012      06        21        173              0.231125      23.812927       1.112697       0.297554       0.111000   -9999.000000       0.083400       0.675000
54218     54218     neimenggu      118.9300       42.2700           71       196     2012      06        22        174              0.229292      25.628693       3.034296       0.289055       0.152000   -9999.000000       0.113600   -9999.000000
54218     54218     neimenggu      118.9300       42.2700           71       196     2012      06        23        175              0.228917      24.529388       0.045296       0.294971       0.158000   -9999.000000       0.088500       0.708000
54218     54218     neimenggu      118.9300       42.2700           71       196     2012      06        24        176              0.231083      26.989044      10.196096       0.280106       0.162000       0.145500       0.116800       1.000000
54218     54218     neimenggu      118.9300       42.2700           71       196     2012      06        25        177              0.232625      23.599792       2.996505       0.306970       0.176500       0.287400       0.115100       1.000000
54218     54218     neimenggu      118.9300       42.2700           71       196     2012      06        26        178              0.230500      23.166687       0.000000       0.311272       0.121000   -9999.000000       0.087000       0.779000
54218     54218     neimenggu      118.9300       42.2700           71       196     2012      06        27        179              0.229042      25.766418       0.251811       0.290155       0.113500   -9999.000000       0.083700   -9999.000000
54218     54218     neimenggu      118.9300       42.2700           71       196     2012      06        28        180              0.226250      26.520325       0.230334       0.277719       0.125000       0.147400       0.083700       0.592000
54218     54218     neimenggu      118.9300       42.2700           71       196     2012      06        29        181              0.227208      22.945038       1.557772       0.275804       0.122000       0.172500       0.097500   -9999.000000
54218     54218     neimenggu      118.9300       42.2700           71       196     2012      06        30        182              0.227667      24.389008       0.000000       0.278080       0.102500       0.135700       0.084100   -9999.000000
54218     54218     neimenggu      118.9300       42.2700           71       196     2012      07        01        183              0.225208      27.479218       4.432443       0.259941       0.106000       0.189200       0.064400       0.608000
54218     54218     neimenggu      118.9300       42.2700           71       196     2012      07        02        184              0.223417      25.559113       0.241518       0.244552       0.123000   -9999.000000       0.068400   -9999.000000
54218     54218     neimenggu      118.9300       42.2700           71       196     2012      07        03        185              0.221750      25.738556       0.000000       0.234554       0.120000       0.055100       0.066800       0.413000
54218     54218     neimenggu      118.9300       42.2700           71       196     2012      07        04        186              0.221375      24.892914       0.000000       0.229112       0.112000       0.110300       0.068000       0.629000
54218     54218     neimenggu      118.9300       42.2700           71       196     2012      07        05        187              0.219083      26.816986       0.196510       0.219460       0.122000       0.255900       0.074700       0.505000
54218     54218     neimenggu      118.9300       42.2700           71       196     2012      07        06        188              0.217917      27.152222       0.000000       0.213125   -9999.000000       0.059900       0.060700       0.606000
54218     54218     neimenggu      118.9300       42.2700           71       196     2012      07        07        189              0.216750      27.848206       1.231028       0.205137   -9999.000000       0.208200       0.066300       0.398000
54218     54218     neimenggu      118.9300       42.2700           71       196     2012      07        08        190              0.215958      28.734528       0.250094       0.207651       0.108500       0.166100       0.067000       0.614000
54218     54218     neimenggu      118.9300       42.2700           71       196     2012      07        09        191              0.214167      30.055359       1.746765       0.202316       0.143000       0.140600       0.084200       0.659000
54218     54218     neimenggu      118.9300       42.2700           71       196     2012      07        10        192              0.219917      29.232269       8.052244       0.211288       0.166000   -9999.000000       0.111000   -9999.000000
54218     54218     neimenggu      118.9300       42.2700           71       196     2012      07        11        193              0.222542      25.400116       1.699171       0.263080       0.189500   -9999.000000       0.118400       0.682000
54218     54218     neimenggu      118.9300       42.2700           71       196     2012      07        12        194              0.226833      23.173553       9.808457       0.259191   -9999.000000       0.201800       0.109600       0.912000
54218     54218     neimenggu      118.9300       42.2700           71       196     2012      07        13        195              0.227458      21.525482       0.047027       0.298856       0.183500       0.196000       0.096900       0.770000
54218     54218     neimenggu      118.9300       42.2700           71       196     2012      07        14        196              0.224833      22.957092       0.000000       0.275182       0.169000       0.209200       0.089100       0.647000
54218     54218     neimenggu      118.9300       42.2700           71       196     2012      07        15        197              0.222750      24.698486       0.000000       0.255128   -9999.000000   -9999.000000       0.075100       0.682000
54218     54218     neimenggu      118.9300       42.2700           71       196     2012      07        16        198              0.220667      26.660919       0.000000       0.237833       0.127500   -9999.000000       0.090100       0.488000
54218     54218     neimenggu      118.9300       42.2700           71       196     2012      07        17        199              0.218458      28.324982       0.000000       0.221628       0.117000   -9999.000000   -9999.000000       0.514000
54218     54218     neimenggu      118.9300       42.2700           71       196     2012      07        18        200              0.216000      29.443329       2.674202       0.206156       0.097000   -9999.000000       0.067100       0.494000
54218     54218     neimenggu      118.9300       42.2700           71       196     2012      07        19        201              0.212333      30.108093       0.000000       0.193715       0.114500       0.158300       0.072900       0.682000
54218     54218     neimenggu      118.9300       42.2700           71       196     2012      07        20        202              0.208458      30.323822       4.123846       0.185029       0.151000   -9999.000000       0.094100       0.680000
54218     54218     neimenggu      118.9300       42.2700           71       196     2012      07        21        203              0.210792      30.510284      34.976410       0.206027       0.213500       0.075400       0.080900   -9999.000000
54218     54218     neimenggu      118.9300       42.2700           71       196     2012      07        22        204              0.235625      26.246063       3.418960       0.285602       0.252000   -9999.000000       0.112500       0.984000
54218     54218     neimenggu      118.9300       42.2700           71       196     2012      07        23        205              0.230792      23.276550       0.087750       0.323692       0.193000   -9999.000000       0.106300       0.793000
54218     54218     neimenggu      118.9300       42.2700           71       196     2012      07        24        206              0.227500      25.754486       0.000000       0.291490       0.184500       0.177600       0.103400       0.724000
54218     54218     neimenggu      118.9300       42.2700           71       196     2012      07        25        207              0.224458      26.274780       0.027692       0.279018       0.178000   -9999.000000       0.106700       0.673000
54218     54218     neimenggu      118.9300       42.2700           71       196     2012      07        26        208              0.221833      27.178894       0.452646       0.266469       0.196000   -9999.000000       0.117600   -9999.000000
54218     54218     neimenggu      118.9300       42.2700           71       196     2012      07        27        209              0.218792      26.823822       0.405562       0.255310       0.165500       0.102100       0.110400       0.575000
54218     54218     neimenggu      118.9300       42.2700           71       196     2012      07        28        210              0.221125      27.900238       8.877504       0.241889   -9999.000000   -9999.000000       0.119300       0.815000
54218     54218     neimenggu      118.9300       42.2700           71       196     2012      07        29        211              0.220917      25.230042       0.516891       0.290500       0.177000       0.166300       0.091700       0.781000
54218     54218     neimenggu      118.9300       42.2700           71       196     2012      07        30        212              0.217167      24.764343       1.283020       0.267162       0.171000       0.109900       0.098100       0.625000
54218     54218     neimenggu      118.9300       42.2700           71       196     2012      07        31        213              0.213417      25.508240       1.141258       0.258379       0.178000   -9999.000000       0.114300   -9999.000000
54218     54218     neimenggu      118.9300       42.2700           71       196     2012      08        01        214              0.219542      22.226837      17.718964       0.265896       0.229500   -9999.000000       0.122100       0.582000
54218     54218     neimenggu      118.9300       42.2700           71       196     2012      08        02        215              0.227583      22.175507       0.000000       0.309639       0.225000   -9999.000000       0.137000       0.752000
54218     54218     neimenggu      118.9300       42.2700           71       196     2012      08        03        216              0.225208      22.507690       0.000000       0.301787       0.149000   -9999.000000   -9999.000000       0.876000
54218     54218     neimenggu      118.9300       42.2700           71       196     2012      08        04        217              0.222000      24.868896       0.000000       0.285112       0.194000   -9999.000000       0.102500       0.646000
54218     54218     neimenggu      118.9300       42.2700           71       196     2012      08        05        218              0.219625      24.450806       0.000000       0.275140       0.236000       0.368300       0.106000       0.595000
54218     54218     neimenggu      118.9300       42.2700           71       196     2012      08        06        219              0.215708      26.699799       0.000000       0.261847       0.187500       0.189500       0.119700       0.646000
54218     54218     neimenggu      118.9300       42.2700           71       196     2012      08        07        220              0.211375      27.047913       0.051198       0.249875       0.169000   -9999.000000   -9999.000000       0.629000
54218     54218     neimenggu      118.9300       42.2700           71       196     2012      08        08        221              0.205708      29.551544       0.991258       0.236694   -9999.000000       0.036500       0.122800   -9999.000000
54218     54218     neimenggu      118.9300       42.2700           71       196     2012      08        09        222              0.201792      24.904755       0.189955       0.242275       0.163500       0.205100       0.092100       0.465000
54218     54218     neimenggu      118.9300       42.2700           71       196     2012      08        10        223              0.195875      26.502228       0.226261       0.226415       0.172000       0.244200       0.094300       0.463000
54218     54218     neimenggu      118.9300       42.2700           71       196     2012      08        11        224              0.190792      27.515350       1.895469       0.213189       0.203000       0.241000       0.104400       0.427000
54218     54218     neimenggu      118.9300       42.2700           71       196     2012      08        12        225              0.188708      23.445648       0.382116       0.223362       0.201500   -9999.000000       0.110200       0.555000
54218     54218     neimenggu      118.9300       42.2700           71       196     2012      08        13        226              0.188333      20.273438       0.000000       0.231117       0.169000       0.198700       0.120200       0.638000
54218     54218     neimenggu      118.9300       42.2700           71       196     2012      08        14        227              0.186750      23.379456       0.962961       0.214103       0.154000       0.125900       0.133500       0.511000
54218     54218     neimenggu      118.9300       42.2700           71       196     2012      08        15        228              0.186292      22.879883       0.072383       0.210500       0.165000   -9999.000000       0.112100       0.496000
54218     54218     neimenggu      118.9300       42.2700           71       196     2012      08        16        229              0.185500      24.488922       0.212581       0.205472       0.182000   -9999.000000       0.112800       0.560000
54218     54218     neimenggu      118.9300       42.2700           71       196     2012      08        17        230              0.184792      26.224396       0.000000       0.192297       0.175500       0.092100       0.112000       0.642000
54218     54218     neimenggu      118.9300       42.2700           71       196     2012      08        18        231              0.204042      27.219696       5.288407       0.184512       0.161000       0.242800       0.117600       0.770000
54218     54218     neimenggu      118.9300       42.2700           71       196     2012      08        19        232              0.214167      23.826843       0.000000       0.234816       0.152000   -9999.000000       0.132000   -9999.000000
54218     54218     neimenggu      118.9300       42.2700           71       196     2012      08        20        233              0.208792      24.777008       0.454052       0.216390       0.190000       0.286400   -9999.000000       0.525000
54218     54218     neimenggu      118.9300       42.2700           71       196     2012      08        21        234              0.204625      21.078430       0.515385       0.206340       0.190000   -9999.000000       0.093300       0.575000
54218     54218     neimenggu      118.9300       42.2700           71       196     2012      08        22        235              0.201208      20.039978       0.000000       0.198966       0.170000       0.014900       0.101500   -9999.000000
54218     54218     neimenggu      118.9300       42.2700           71       196     2012      08        23        236              0.198500      20.764282       0.000000       0.187149       0.176500       0.189500       0.107900       0.670000
54218     54218     neimenggu      118.9300       42.2700           71       196     2012      08        24        237              0.194375      24.597809       0.000000       0.175882       0.161000   -9999.000000       0.099400   -9999.000000
54218     54218     neimenggu      118.9300       42.2700           71       196     2012      08        25        238              0.000000      25.198334       0.000000       0.166935       0.176500   -9999.000000       0.115900   -9999.000000
54218     54218     neimenggu      118.9300       42.2700           71       196     2012      08        26        239              0.187375      26.639191       0.000000       0.161165       0.185000       0.071600       0.094900       0.485000
54218     54218     neimenggu      118.9300       42.2700           71       196     2012      08        27        240              0.185250      26.533264       0.000000       0.159036       0.190000       0.059600       0.089300       0.509000
54218     54218     neimenggu      118.9300       42.2700           71       196     2012      08        28        241              0.184000      26.008636       0.000000       0.158179       0.178000   -9999.000000       0.095900       0.589000
54218     54218     neimenggu      118.9300       42.2700           71       196     2012      08        29        242              0.182083      27.271271       0.000000       0.155521       0.174000       0.143600       0.087300   -9999.000000
54218     54218     neimenggu      118.9300       42.2700           71       196     2012      08        30        243              0.180667      26.182770       0.000000       0.151862       0.126000   -9999.000000       0.109000       0.568000
54218     54218     neimenggu      118.9300       42.2700           71       196     2012      08        31        244              0.179042      28.364868       0.067498       0.149961       0.164500       0.166100       0.108000       0.607000
54218     54218     neimenggu      118.9300       42.2700           71       196     2012      09        01        245              0.177958      28.163788       2.989992       0.150395   -9999.000000       0.019200       0.087200       0.455000
54218     54218     neimenggu      118.9300       42.2700           71       196     2012      09        02        246              0.214917      28.542206      21.451735       0.161468       0.216000       0.466900       0.126200       0.900000
54218     54218     neimenggu      118.9300       42.2700           71       196     2012      09        03        247              0.221333      17.170410       0.000000       0.304752       0.221500       0.120800       0.116700       0.911000
54218     54218     neimenggu      118.9300       42.2700           71       196     2012      09        04        248              0.217083      17.093811       0.000000       0.272410       0.166000       0.119900       0.097300       0.640000
54218     54218     neimenggu      118.9300       42.2700           71       196     2012      09        05        249              0.215333      15.989441       0.000000       0.256416       0.164000       0.243700       0.103400       0.532000
54218     54218     neimenggu      118.9300       42.2700           71       196     2012      09        06        250              0.213708      19.872467       0.000000       0.242051       0.166000   -9999.000000       0.080300   -9999.000000
54218     54218     neimenggu      118.9300       42.2700           71       196     2012      09        07        251              0.211167      22.066132       0.000000       0.228850       0.172000   -9999.000000       0.082400       0.574000
54218     54218     neimenggu      118.9300       42.2700           71       196     2012      09        08        252              0.209458      20.916412       0.000000       0.220997       0.164000   -9999.000000       0.089500       0.368000
54218     54218     neimenggu      118.9300       42.2700           71       196     2012      09        09        253              0.207667      21.164459       0.390674       0.212213       0.163000       0.046500       0.093100   -9999.000000
54218     54218     neimenggu      118.9300       42.2700           71       196     2012      09        10        254              0.205958      22.922760       0.220471       0.201201       0.131000   -9999.000000       0.076800       0.524000
54218     54218     neimenggu      118.9300       42.2700           71       196     2012      09        11        255              0.211667      23.934570      11.597599       0.191232       0.123000   -9999.000000       0.109900       0.928000
54218     54218     neimenggu      118.9300       42.2700           71       196     2012      09        12        256              0.224208      20.938385       0.096788       0.237527   -9999.000000   -9999.000000       0.089300       0.680000
54218     54218     neimenggu      118.9300       42.2700           71       196     2012      09        13        257              0.219625      14.708160       0.000000       0.263948       0.154500       0.057700       0.083400       0.505000
54218     54218     neimenggu      118.9300       42.2700           71       196     2012      09        14        258              0.217167      14.996552       0.000000       0.246130       0.146500       0.128900       0.083000       0.441000
54218     54218     neimenggu      118.9300       42.2700           71       196     2012      09        15        259              0.215083      16.934357       0.000000       0.235139   -9999.000000   -9999.000000       0.083100       0.431000
54218     54218     neimenggu      118.9300       42.2700           71       196     2012      09        16        260              0.212875      17.002991       0.000000       0.225594       0.140500       0.051500       0.091500       0.451000
54218     54218     neimenggu      118.9300       42.2700           71       196     2012      09        17        261              0.211083      17.196686       0.000000       0.216697       0.158000       0.117500       0.086600   -9999.000000
54218     54218     neimenggu      118.9300       42.2700           71       196     2012      09        18        262              0.209375      17.565247       0.000000       0.207637       0.149000       0.148500       0.071400       0.604000
54218     54218     neimenggu      118.9300       42.2700           71       196     2012      09        19        263              0.207750      17.844574       0.000000       0.198644       0.149000   -9999.000000       0.074600       0.474000
54218     54218     neimenggu      118.9300       42.2700           71       196     2012      09        20        264              0.207000      18.865082       0.000000       0.191135       0.130000       0.022400       0.084900       0.383000
54218     54218     neimenggu      118.9300       42.2700           71       196     2012      09        21        265              0.205667      20.323883       2.620089       0.184253   -9999.000000       0.053400       0.077400       0.621000
54218     54218     neimenggu      118.9300       42.2700           71       196     2012      09        22        266              0.203792      20.888885       0.110970       0.191288       0.121500       0.166500       0.094400   -9999.000000
54218     54218     neimenggu      118.9300       42.2700           71       196     2012      09        23        267              0.202000      19.493134       0.302697       0.192470       0.124000       0.156400       0.069700       0.445000
54218     54218     neimenggu      118.9300       42.2700           71       196     2012      09        24        268              0.200583      19.245239       0.000000       0.187647       0.121500   -9999.000000       0.064300       0.546000
54218     54218     neimenggu      118.9300       42.2700           71       196     2012      09        25        269              0.198917      19.830780       2.747517       0.182594       0.149000   -9999.000000       0.088500       0.480000
54218     54218     neimenggu      118.9300       42.2700           71       196     2012      09        26        270              0.199042      15.273376       0.275116       0.214657       0.105000   -9999.000000       0.076500       0.479000
54218     54218     neimenggu      118.9300       42.2700           71       196     2012      09        27        271              0.198000      16.660980       9.801168       0.206141   -9999.000000       0.171300       0.097400   -9999.000000
54218     54218     neimenggu      118.9300       42.2700           71       196     2012      09        28        272              0.197800      12.186737       1.176268       0.260957   -9999.000000   -9999.000000       0.094400       0.743000
54218     54218     neimenggu      118.9300       42.2700           71       196     2012      09        29        273              0.198792      10.287201       0.000000       0.263911       0.154000   -9999.000000       0.066400       0.456000
54218     54218     neimenggu      118.9300       42.2700           71       196     2012      09        30        274              0.198667      12.292603       0.000000       0.243783       0.130500   -9999.000000       0.068200       0.395000
54218     54218     neimenggu      118.9300       42.2700           71       196     2012      10        01        275              0.198208      13.601105       0.000000       0.233905       0.086000   -9999.000000       0.067400       0.347000
54218     54218     neimenggu      118.9300       42.2700           71       196     2012      10        02        276              0.198292      15.239960       0.690332       0.224919       0.106000   -9999.000000       0.062800       0.350000
54218     54218     neimenggu      118.9300       42.2700           71       196     2012      10        03        277              0.196958      16.395874       0.000000       0.217813       0.108000       0.067000       0.077400       0.343000
54218     54218     neimenggu      118.9300       42.2700           71       196     2012      10        04        278              0.195792      13.867737       0.000000       0.210425       0.106000       0.110300   -9999.000000       0.542000
54218     54218     neimenggu      118.9300       42.2700           71       196     2012      10        05        279              0.194208      14.109222       0.034817       0.203686       0.107000   -9999.000000       0.058100   -9999.000000
54218     54218     neimenggu      118.9300       42.2700           71       196     2012      10        06        280              0.193208      12.896149       0.000000       0.198906       0.110000       0.017700       0.067100       0.463000
54218     54218     neimenggu      118.9300       42.2700           71       196     2012      10        07        281              0.192958      14.143311       0.000000       0.194906       0.093000       0.093500       0.077000       0.244000
54218     54218     neimenggu      118.9300       42.2700           71       196     2012      10        08        282              0.192958      15.590759       1.566423       0.190711       0.101500   -9999.000000       0.069900   -9999.000000
54218     54218     neimenggu      118.9300       42.2700           71       196     2012      10        09        283              0.190500      17.374298       0.770733       0.190899   -9999.000000       0.073700       0.079600       0.512000
54218     54218     neimenggu      118.9300       42.2700           71       196     2012      10        10        284              0.189000      10.634796       0.000000       0.214729       0.121000   -9999.000000       0.057800       0.453000
54218     54218     neimenggu      118.9300       42.2700           71       196     2012      10        11        285              0.189292      10.690399       0.117263       0.203987       0.100000       0.148400       0.060400       0.354000
54218     54218     neimenggu      118.9300       42.2700           71       196     2012      10        12        286              0.188792      13.138702       0.000000       0.198441       0.092000   -9999.000000       0.064800       0.320000
54218     54218     neimenggu      118.9300       42.2700           71       196     2012      10        13        287              0.186083      13.898529       0.000000       0.192847       0.080000   -9999.000000       0.060100       0.357000
54218     54218     neimenggu      118.9300       42.2700           71       196     2012      10        14        288              0.184917       9.027985       0.000000       0.186899   -9999.000000   -9999.000000       0.067400       0.402000
54218     54218     neimenggu      118.9300       42.2700           71       196     2012      10        15        289              0.184833       8.413635       1.000728       0.183285       0.096000       0.115400       0.079400       0.364000
54218     54218     neimenggu      118.9300       42.2700           71       196     2012      10        16        290              0.183417      11.381714       5.005408       0.187633       0.129000   -9999.000000       0.061100   -9999.000000
54218     54218     neimenggu      118.9300       42.2700           71       196     2012      10        17        291              0.181875       6.219482       0.000000       0.243288       0.098000       0.139700       0.066200       0.417000
54218     54218     neimenggu      118.9300       42.2700           71       196     2012      10        18        292              0.181375       5.738251       0.000000       0.223837       0.094000       0.205800       0.064200       0.268000
54218     54218     neimenggu      118.9300       42.2700           71       196     2012      10        19        293              0.181625       6.069244       0.000000       0.217145       0.094500   -9999.000000       0.058700       0.280000
54218     54218     neimenggu      118.9300       42.2700           71       196     2012      10        20        294              0.180750       9.056305       0.562620       0.216123   -9999.000000   -9999.000000       0.073200       0.547000
54218     54218     neimenggu      118.9300       42.2700           71       196     2012      10        21        295              0.179167       7.263580       5.981925       0.210480   -9999.000000   -9999.000000   -9999.000000   -9999.000000
54218     54218     neimenggu      118.9300       42.2700           71       196     2012      10        22        296              0.191042       4.216248       4.993546       0.229592   -9999.000000   -9999.000000       0.059900       0.604000
54218     54218     neimenggu      118.9300       42.2700           71       196     2012      10        23        297              0.221583       3.625977       3.675750       0.283932   -9999.000000   -9999.000000       0.090200       0.756000
54218     54218     neimenggu      118.9300       42.2700           71       196     2012      10        24        298              0.220542       6.649963       0.000000       0.265089   -9999.000000   -9999.000000       0.075300       0.759000
54218     54218     neimenggu      118.9300       42.2700           71       196     2012      10        25        299              0.000000       8.589233       0.000000       0.253866   -9999.000000   -9999.000000       0.072000       0.533000
54218     54218     neimenggu      118.9300       42.2700           71       196     2012      10        26        300              0.217417       9.628601       0.496703       0.247938       0.116500       0.139700       0.085900   -9999.000000
54218     54218     neimenggu      118.9300       42.2700           71       196     2012      10        27        301              0.215958      11.236664       0.149138       0.243533       0.103000       0.079600       0.061600       0.424000
54218     54218     neimenggu      118.9300       42.2700           71       196     2012      10        28        302              0.000000       8.414948       0.000000       0.233889       0.090000       0.282700       0.061000       0.445000
54218     54218     neimenggu      118.9300       42.2700           71       196     2012      10        29        303              0.210458       5.412079       0.000000       0.233897   -9999.000000       0.109400       0.065800       0.376000
54218     54218     neimenggu      118.9300       42.2700           71       196     2012      10        30        304              0.209250       1.135406       0.175541       0.201317   -9999.000000       0.221400       0.050000       0.431000
54218     54218     neimenggu      118.9300       42.2700           71       196     2012      10        31        305              0.208417       1.826263       0.300502       0.200110   -9999.000000   -9999.000000       0.063900       0.426000
54218     54218     neimenggu      118.9300       42.2700           71       196     2012      11        01        306              0.208708       1.730591       0.000000       0.203667       0.105000   -9999.000000       0.064800       0.244000
54218     54218     neimenggu      118.9300       42.2700           71       196     2012      11        02        307              0.207958       2.740845       0.075445       0.210045       0.105000       0.116400       0.052400       0.538000
54218     54218     neimenggu      118.9300       42.2700           71       196     2012      11        03        308              0.207042       2.835693       3.050748       0.205019   -9999.000000       0.426500       0.064800   -9999.000000
54218     54218     neimenggu      118.9300       42.2700           71       196     2012      11        04        309              0.208167       1.044342       0.733489       0.199106   -9999.000000   -9999.000000       0.066100       0.305000
54218     54218     neimenggu      118.9300       42.2700           71       196     2012      11        05        310              0.212833       0.147400       0.000000       0.185175   -9999.000000   -9999.000000       0.051300       0.310000
54218     54218     neimenggu      118.9300       42.2700           71       196     2012      11        06        311              0.208750      -0.674866       0.000000       0.181250   -9999.000000   -9999.000000       0.054600       0.366000
54218     54218     neimenggu      118.9300       42.2700           71       196     2012      11        07        312              0.209542      -2.153259       1.636078       0.159101       0.106000   -9999.000000       0.039900       0.423000
54218     54218     neimenggu      118.9300       42.2700           71       196     2012      11        08        313              0.210875      -0.393433       0.274074       0.174744       0.092000   -9999.000000   -9999.000000       0.404000
54218     54218     neimenggu      118.9300       42.2700           71       196     2012      11        09        314              0.209000      -1.024994       9.168873       0.170314   -9999.000000   -9999.000000       0.048200       0.425000
54218     54218     neimenggu      118.9300       42.2700           71       196     2012      11        10        315              0.209917      -1.297302       0.000000       0.165846   -9999.000000   -9999.000000       0.048000       0.405000
54218     54218     neimenggu      118.9300       42.2700           71       196     2012      11        11        316              0.214417      -0.433014       0.000000       0.170427   -9999.000000   -9999.000000       0.045500       0.348000
54218     54218     neimenggu      118.9300       42.2700           71       196     2012      11        12        317              0.215000      -2.645874       0.000000       0.145971   -9999.000000   -9999.000000       0.042200       0.199000
54218     54218     neimenggu      118.9300       42.2700           71       196     2012      11        13        318              0.000000      -3.541840       0.000000       0.145002   -9999.000000   -9999.000000       0.027400       0.297000
54218     54218     neimenggu      118.9300       42.2700           71       196     2012      11        14        319              0.214917      -4.915985       0.000000       0.132311   -9999.000000       0.084000       0.035800   -9999.000000
54218     54218     neimenggu      118.9300       42.2700           71       196     2012      11        15        320              0.214000      -5.039368       0.000000       0.138860   -9999.000000       0.171700       0.044700       0.292000
54218     54218     neimenggu      118.9300       42.2700           71       196     2012      11        16        321              0.214000      -3.287292       0.000000       0.140217   -9999.000000   -9999.000000       0.021900       0.377000
54218     54218     neimenggu      118.9300       42.2700           71       196     2012      11        17        322              0.000000      -4.284119       0.000000       0.144794   -9999.000000       0.262000       0.038500       0.208000
54218     54218     neimenggu      118.9300       42.2700           71       196     2012      11        18        323              0.214000      -5.495880       0.000000       0.134872   -9999.000000   -9999.000000   -9999.000000       0.229000
54218     54218     neimenggu      118.9300       42.2700           71       196     2012      11        19        324              0.213792      -2.647369       0.000000       0.148027   -9999.000000   -9999.000000       0.027000   -9999.000000
54218     54218     neimenggu      118.9300       42.2700           71       196     2012      11        20        325              0.212750      -3.986664       0.000000       0.141948   -9999.000000       0.031200       0.034900       0.261000
54218     54218     neimenggu      118.9300       42.2700           71       196     2012      11        21        326              0.212000      -3.899567       0.000000       0.140352   -9999.000000       0.070000       0.032400       0.346000
54218     54218     neimenggu      118.9300       42.2700           71       196     2012      11        22        327              0.211875      -3.443390       0.000000       0.146748   -9999.000000   -9999.000000       0.019400       0.224000
54218     54218     neimenggu      118.9300       42.2700           71       196     2012      11        23        328              0.210167      -6.076538       0.000000       0.133019   -9999.000000       0.173800       0.031500       0.285000
54218     54218     neimenggu      118.9300       42.2700           71       196     2012      11        24        329              0.208375      -6.558014       0.000000       0.125173   -9999.000000   -9999.000000       0.015400   -9999.000000
54218     54218     neimenggu      118.9300       42.2700           71       196     2012      11        25        330              0.207917      -4.552429       0.000000       0.131659   -9999.000000   -9999.000000       0.018700       0.228000
54218     54218     neimenggu      118.9300       42.2700           71       196     2012      11        26        331              0.206000      -5.854248       0.000000       0.130653   -9999.000000       0.239800       0.027000       0.368000
54218     54218     neimenggu      118.9300       42.2700           71       196     2012      11        27        332              0.204083      -7.739716       0.000000       0.121904   -9999.000000       0.037900       0.029900       0.360000
54218     54218     neimenggu      118.9300       42.2700           71       196     2012      11        28        333              0.202750      -3.351776       0.000000       0.138864   -9999.000000   -9999.000000       0.024600       0.204000
54218     54218     neimenggu      118.9300       42.2700           71       196     2012      11        29        334              0.197750      -7.160431       0.000000       0.124153   -9999.000000   -9999.000000       0.029000       0.329000
54218     54218     neimenggu      118.9300       42.2700           71       196     2012      11        30        335              0.189042      -9.872955       0.000000       0.119369   -9999.000000       0.139100       0.012300       0.111000
54218     54218     neimenggu      118.9300       42.2700           71       196     2012      12        01        336              0.180833     -12.854248       0.000000       0.114816   -9999.000000       0.100900       0.022200       0.082000
54218     54218     neimenggu      118.9300       42.2700           71       196     2012      12        02        337              0.180458     -10.064941       0.000000       0.114779   -9999.000000   -9999.000000       0.026500   -9999.000000
54218     54218     neimenggu      118.9300       42.2700           71       196     2012      12        03        338              0.179333      -5.455841       0.000000       0.126617   -9999.000000   -9999.000000       0.022100       0.254000
54218     54218     neimenggu      118.9300       42.2700           71       196     2012      12        04        339              0.176333      -9.578522       0.000000       0.119421   -9999.000000   -9999.000000       0.029400       0.260000
54218     54218     neimenggu      118.9300       42.2700           71       196     2012      12        05        340              0.174167      -9.573151       0.000000       0.117745   -9999.000000   -9999.000000   -9999.000000       0.234000
54218     54218     neimenggu      118.9300       42.2700           71       196     2012      12        06        341              0.170958     -13.319672       0.000000       0.115937   -9999.000000   -9999.000000       0.014900       0.285000
54218     54218     neimenggu      118.9300       42.2700           71       196     2012      12        07        342              0.169208     -13.396606       0.000000       0.112898   -9999.000000   -9999.000000       0.020600       0.257000
54218     54218     neimenggu      118.9300       42.2700           71       196     2012      12        08        343              0.168000     -14.023346       0.000000       0.113096   -9999.000000   -9999.000000       0.024200       0.291000
54218     54218     neimenggu      118.9300       42.2700           71       196     2012      12        09        344              0.167958     -14.143860       0.000000       0.113880   -9999.000000   -9999.000000       0.017000       0.242000
54218     54218     neimenggu      118.9300       42.2700           71       196     2012      12        10        345              0.167250     -11.068420       0.000000       0.114667   -9999.000000   -9999.000000       0.018400       0.228000
54218     54218     neimenggu      118.9300       42.2700           71       196     2012      12        11        346              0.166417     -12.889801       0.000000       0.114443   -9999.000000   -9999.000000       0.010000       0.193000
54218     54218     neimenggu      118.9300       42.2700           71       196     2012      12        12        347              0.166667     -12.298920       0.000000       0.113927   -9999.000000   -9999.000000       0.013900       0.286000
54218     54218     neimenggu      118.9300       42.2700           71       196     2012      12        13        348              0.167000      -9.409546       0.051423       0.115011   -9999.000000   -9999.000000       0.014700   -9999.000000
54218     54218     neimenggu      118.9300       42.2700           71       196     2012      12        14        349              0.167000      -9.174744       3.568917       0.116332   -9999.000000   -9999.000000       0.010000       0.224000
54218     54218     neimenggu      118.9300       42.2700           71       196     2012      12        15        350              0.000000      -9.748932       0.000000       0.116689   -9999.000000   -9999.000000       0.011800       0.168000
54218     54218     neimenggu      118.9300       42.2700           71       196     2012      12        16        351              0.167000      -8.681915       0.788651       0.117798   -9999.000000   -9999.000000       0.010000       0.067000
54218     54218     neimenggu      118.9300       42.2700           71       196     2012      12        17        352              0.167000      -8.650421       0.224190       0.118659   -9999.000000   -9999.000000       0.010000       0.159000
54218     54218     neimenggu      118.9300       42.2700           71       196     2012      12        18        353              0.166000      -8.642792       1.488189       0.119386   -9999.000000   -9999.000000       0.010000   -9999.000000
54218     54218     neimenggu      118.9300       42.2700           71       196     2012      12        19        354              0.166000      -9.307800       0.000000       0.119951   -9999.000000   -9999.000000       0.010000       0.146000
54218     54218     neimenggu      118.9300       42.2700           71       196     2012      12        20        355              0.000000      -9.242493       0.160165       0.120265   -9999.000000   -9999.000000       0.010000       0.111000
54218     54218     neimenggu      118.9300       42.2700           71       196     2012      12        21        356              0.166000      -8.729309       0.538856       0.120563   -9999.000000   -9999.000000       0.010000       0.289000
54218     54218     neimenggu      118.9300       42.2700           71       196     2012      12        22        357              0.165875      -8.798889       0.154772       0.120972   -9999.000000   -9999.000000       0.010000       0.197000
54218     54218     neimenggu      118.9300       42.2700           71       196     2012      12        23        358              0.164792      -9.707397       0.564572       0.120803   -9999.000000   -9999.000000   -9999.000000   -9999.000000
54218     54218     neimenggu      118.9300       42.2700           71       196     2012      12        24        359              0.164000     -10.768219       0.282726       0.119681   -9999.000000   -9999.000000       0.010000       0.103000
54218     54218     neimenggu      118.9300       42.2700           71       196     2012      12        25        360              0.163042     -10.603546       1.371620       0.119012   -9999.000000   -9999.000000       0.010000       0.294000
54218     54218     neimenggu      118.9300       42.2700           71       196     2012      12        26        361              0.000000     -11.070160       0.000000       0.118894   -9999.000000   -9999.000000       0.010000       0.162000
54218     54218     neimenggu      118.9300       42.2700           71       196     2012      12        27        362              0.163000     -10.785492       0.000000       0.118624   -9999.000000   -9999.000000       0.010000       0.190000
54218     54218     neimenggu      118.9300       42.2700           71       196     2012      12        28        363              0.163000     -10.035095       5.210821       0.118934   -9999.000000   -9999.000000       0.010000       0.190000
54218     54218     neimenggu      118.9300       42.2700           71       196     2012      12        29        364              0.000000      -9.270721       0.107354       0.119135   -9999.000000   -9999.000000   -9999.000000       0.050000
54218     54218     neimenggu      118.9300       42.2700           71       196     2012      12        30        365              0.000000      -7.855835       0.373417       0.119491   -9999.000000   -9999.000000       0.010000       0.128000
54218     54218     neimenggu      118.9300       42.2700           71       196     2012      12        31        366              0.163000      -7.288025       1.726632       0.119795   -9999.000000   -9999.000000       0.010000   -9999.000000
