# Supplementary material for: Research on Fusing Multisatellite Soil Moisture Data Based on Bayesian Model Averaging
Source: Hindawi journal article supplement (doi:10.1155/2018/9310838), 2018-06-25
Supplement: f1 [file 9310838.f1.zip › 2012_sm00-10cm_daily_ZDB_ZHY_54223_366days_allin.txt]

54223     54223     neimenggu      120.6406       42.8339           69       203     2012      01        01        001              0.000000   -9999.000000       0.000000   -9999.000000   -9999.000000   -9999.000000       0.061800   -9999.000000
54223     54223     neimenggu      120.6406       42.8339           69       203     2012      01        02        002              0.000000      -9.098480       0.000000       0.085515   -9999.000000   -9999.000000       0.045100   -9999.000000
54223     54223     neimenggu      120.6406       42.8339           69       203     2012      01        03        003              0.000000      -8.638336       0.000000       0.085675   -9999.000000   -9999.000000       0.043600       0.115000
54223     54223     neimenggu      120.6406       42.8339           69       203     2012      01        04        004              0.000000      -8.710693       0.000000       0.085801   -9999.000000   -9999.000000       0.049700       0.113000
54223     54223     neimenggu      120.6406       42.8339           69       203     2012      01        05        005              0.000000      -8.944641       0.000000       0.085899   -9999.000000   -9999.000000       0.043000       0.022000
54223     54223     neimenggu      120.6406       42.8339           69       203     2012      01        06        006              0.000000      -9.573822       0.000000       0.085979   -9999.000000   -9999.000000       0.041100       0.146000
54223     54223     neimenggu      120.6406       42.8339           69       203     2012      01        07        007              0.000000     -10.965149       0.000000       0.086046   -9999.000000   -9999.000000       0.052300       0.073000
54223     54223     neimenggu      120.6406       42.8339           69       203     2012      01        08        008              0.000000     -11.381958       0.000000       0.086096   -9999.000000   -9999.000000       0.043800       0.086000
54223     54223     neimenggu      120.6406       42.8339           69       203     2012      01        09        009              0.000000     -11.538239       0.000000       0.086101   -9999.000000   -9999.000000       0.052200       0.088000
54223     54223     neimenggu      120.6406       42.8339           69       203     2012      01        10        010              0.000000     -11.878143       0.000000       0.086045   -9999.000000   -9999.000000   -9999.000000   -9999.000000
54223     54223     neimenggu      120.6406       42.8339           69       203     2012      01        11        011              0.000000     -11.829620       0.000000       0.086045   -9999.000000   -9999.000000       0.053800       0.109000
54223     54223     neimenggu      120.6406       42.8339           69       203     2012      01        12        012              0.000000     -11.204895       0.000000       0.085807   -9999.000000   -9999.000000       0.053500       0.160000
54223     54223     neimenggu      120.6406       42.8339           69       203     2012      01        13        013              0.000000     -10.051453       0.000000       0.086379   -9999.000000   -9999.000000       0.061500       0.121000
54223     54223     neimenggu      120.6406       42.8339           69       203     2012      01        14        014              0.000000      -9.503021       0.000000       0.086158   -9999.000000   -9999.000000       0.055900       0.166000
54223     54223     neimenggu      120.6406       42.8339           69       203     2012      01        15        015              0.000000      -9.684845       0.000000       0.085736   -9999.000000   -9999.000000       0.060200   -9999.000000
54223     54223     neimenggu      120.6406       42.8339           69       203     2012      01        16        016              0.000000      -8.941254       0.000000       0.085837   -9999.000000   -9999.000000       0.069700       0.114000
54223     54223     neimenggu      120.6406       42.8339           69       203     2012      01        17        017              0.000000     -10.642365       0.000000       0.085296   -9999.000000   -9999.000000       0.056500       0.145000
54223     54223     neimenggu      120.6406       42.8339           69       203     2012      01        18        018              0.000000     -12.091461       0.000000       0.084592   -9999.000000   -9999.000000       0.068200       0.144000
54223     54223     neimenggu      120.6406       42.8339           69       203     2012      01        19        019              0.000000     -10.168793       0.000000       0.084684   -9999.000000   -9999.000000       0.058600       0.138000
54223     54223     neimenggu      120.6406       42.8339           69       203     2012      01        20        020              0.000000     -11.767212       0.000000       0.084503   -9999.000000   -9999.000000       0.056000   -9999.000000
54223     54223     neimenggu      120.6406       42.8339           69       203     2012      01        21        021              0.000000     -15.159973       0.000000       0.083237   -9999.000000   -9999.000000       0.062800       0.103000
54223     54223     neimenggu      120.6406       42.8339           69       203     2012      01        22        022              0.000000     -16.624695       0.000000       0.082524   -9999.000000   -9999.000000       0.058300       0.168000
54223     54223     neimenggu      120.6406       42.8339           69       203     2012      01        23        023              0.000000     -16.381317       0.000000       0.082424   -9999.000000   -9999.000000       0.060400       0.106000
54223     54223     neimenggu      120.6406       42.8339           69       203     2012      01        24        024              0.000000     -15.285858       0.000000       0.082519   -9999.000000   -9999.000000       0.066300       0.068000
54223     54223     neimenggu      120.6406       42.8339           69       203     2012      01        25        025              0.000000     -15.344971       0.000000       0.082502   -9999.000000   -9999.000000       0.058700       0.124000
54223     54223     neimenggu      120.6406       42.8339           69       203     2012      01        26        026              0.000000     -13.072601       0.000000       0.082701   -9999.000000   -9999.000000       0.063600       0.080000
54223     54223     neimenggu      120.6406       42.8339           69       203     2012      01        27        027              0.000000     -12.829773       0.000000       0.082614   -9999.000000   -9999.000000       0.070400       0.126000
54223     54223     neimenggu      120.6406       42.8339           69       203     2012      01        28        028              0.000000     -14.251953       0.000000       0.082166   -9999.000000   -9999.000000       0.061600   -9999.000000
54223     54223     neimenggu      120.6406       42.8339           69       203     2012      01        29        029              0.000000     -12.661896       0.000000       0.082292   -9999.000000   -9999.000000       0.070300       0.101000
54223     54223     neimenggu      120.6406       42.8339           69       203     2012      01        30        030              0.000000     -15.069763       0.000000       0.081724   -9999.000000   -9999.000000   -9999.000000       0.139000
54223     54223     neimenggu      120.6406       42.8339           69       203     2012      01        31        031              0.000000     -15.111969       0.000000       0.081384   -9999.000000   -9999.000000       0.067600   -9999.000000
54223     54223     neimenggu      120.6406       42.8339           69       203     2012      02        01        032              0.000000     -16.484436       0.000000       0.081275   -9999.000000   -9999.000000   -9999.000000       0.097000
54223     54223     neimenggu      120.6406       42.8339           69       203     2012      02        02        033              0.000000     -16.883850       0.000000       0.081195   -9999.000000   -9999.000000       0.071100       0.058000
54223     54223     neimenggu      120.6406       42.8339           69       203     2012      02        03        034              0.000000     -14.018951       0.000000       0.081642   -9999.000000   -9999.000000       0.070700       0.069000
54223     54223     neimenggu      120.6406       42.8339           69       203     2012      02        04        035              0.000000     -12.019775       0.562020       0.081932   -9999.000000   -9999.000000       0.076500       0.130000
54223     54223     neimenggu      120.6406       42.8339           69       203     2012      02        05        036              0.000000      -9.183624       0.000000       0.083597   -9999.000000   -9999.000000       0.073500       0.081000
54223     54223     neimenggu      120.6406       42.8339           69       203     2012      02        06        037              0.000000      -7.539886       0.000000       0.089141   -9999.000000   -9999.000000       0.066800       0.066000
54223     54223     neimenggu      120.6406       42.8339           69       203     2012      02        07        038              0.000000     -12.430939       0.000000       0.084184   -9999.000000   -9999.000000       0.079400       0.109000
54223     54223     neimenggu      120.6406       42.8339           69       203     2012      02        08        039              0.000000     -12.855499       0.000000       0.083062   -9999.000000   -9999.000000       0.065900   -9999.000000
54223     54223     neimenggu      120.6406       42.8339           69       203     2012      02        09        040              0.000000     -11.149506       0.000000       0.083119   -9999.000000   -9999.000000       0.069800       0.116000
54223     54223     neimenggu      120.6406       42.8339           69       203     2012      02        10        041              0.000000      -9.759003       0.000000       0.082993   -9999.000000   -9999.000000       0.069700       0.025000
54223     54223     neimenggu      120.6406       42.8339           69       203     2012      02        11        042              0.000000      -9.585663       3.211768       0.082842   -9999.000000   -9999.000000       0.068000       0.060000
54223     54223     neimenggu      120.6406       42.8339           69       203     2012      02        12        043              0.000000      -8.207489       0.000000       0.083229   -9999.000000   -9999.000000       0.073800       0.138000
54223     54223     neimenggu      120.6406       42.8339           69       203     2012      02        13        044              0.000000      -6.595459       0.000000       0.093723   -9999.000000   -9999.000000       0.080100   -9999.000000
54223     54223     neimenggu      120.6406       42.8339           69       203     2012      02        14        045              0.000000      -5.416718       0.000000       0.102255   -9999.000000   -9999.000000       0.070200       0.073000
54223     54223     neimenggu      120.6406       42.8339           69       203     2012      02        15        046              0.000000      -9.362488       0.000000       0.089583   -9999.000000   -9999.000000       0.083200       0.026000
54223     54223     neimenggu      120.6406       42.8339           69       203     2012      02        16        047              0.000000      -8.053894       0.000000       0.088488   -9999.000000   -9999.000000   -9999.000000       0.039000
54223     54223     neimenggu      120.6406       42.8339           69       203     2012      02        17        048              0.000000      -9.997040       0.000000       0.086766   -9999.000000   -9999.000000       0.076200       0.027000
54223     54223     neimenggu      120.6406       42.8339           69       203     2012      02        18        049              0.000000     -10.698212       0.000000       0.086199   -9999.000000   -9999.000000   -9999.000000   -9999.000000
54223     54223     neimenggu      120.6406       42.8339           69       203     2012      02        19        050              0.000000      -8.185516       0.000000       0.086495   -9999.000000   -9999.000000       0.083000       0.053000
54223     54223     neimenggu      120.6406       42.8339           69       203     2012      02        20        051              0.000000      -4.290314       0.000000       0.113650   -9999.000000   -9999.000000       0.065300       0.051000
54223     54223     neimenggu      120.6406       42.8339           69       203     2012      02        21        052              0.000000      -7.272064       0.000000       0.092392   -9999.000000   -9999.000000       0.070200       0.049000
54223     54223     neimenggu      120.6406       42.8339           69       203     2012      02        22        053              0.000000      -5.647125       0.000000       0.100941   -9999.000000   -9999.000000       0.064000   -9999.000000
54223     54223     neimenggu      120.6406       42.8339           69       203     2012      02        23        054              0.000000      -8.819550       2.780137       0.090820   -9999.000000   -9999.000000       0.059600       0.012000
54223     54223     neimenggu      120.6406       42.8339           69       203     2012      02        24        055              0.000000      -7.125275       0.000000       0.089892   -9999.000000   -9999.000000       0.059600       0.009000
54223     54223     neimenggu      120.6406       42.8339           69       203     2012      02        25        056              0.000000      -6.027710       0.000000       0.102288   -9999.000000       0.089400       0.050800       0.005000
54223     54223     neimenggu      120.6406       42.8339           69       203     2012      02        26        057              0.000000      -8.409637       0.000000       0.089068   -9999.000000   -9999.000000       0.054500   -9999.000000
54223     54223     neimenggu      120.6406       42.8339           69       203     2012      02        27        058              0.000000      -7.532990       0.000000       0.089248   -9999.000000   -9999.000000       0.068400       0.110000
54223     54223     neimenggu      120.6406       42.8339           69       203     2012      02        28        059              0.000000      -3.632019       0.000000       0.112833   -9999.000000   -9999.000000       0.081000       0.239000
54223     54223     neimenggu      120.6406       42.8339           69       203     2012      02        29        060              0.000000   -9999.000000       0.000000   -9999.000000   -9999.000000   -9999.000000   -9999.000000   -9999.000000
54223     54223     neimenggu      120.6406       42.8339           69       203     2012      03        01        061              0.000000       0.216766       0.000000       0.166440       0.116000       0.178700       0.081300       0.103000
54223     54223     neimenggu      120.6406       42.8339           69       203     2012      03        02        062              0.000000      -3.334900       0.000000       0.132104       0.101000       0.015500       0.064000       0.020000
54223     54223     neimenggu      120.6406       42.8339           69       203     2012      03        03        063              0.000000      -5.483307       0.000000       0.103953       0.097000   -9999.000000       0.065100       0.078000
54223     54223     neimenggu      120.6406       42.8339           69       203     2012      03        04        064              0.000000      -2.244720       0.476273       0.126476       0.096000   -9999.000000   -9999.000000       0.054000
54223     54223     neimenggu      120.6406       42.8339           69       203     2012      03        05        065              0.000000       0.330963       1.675321       0.165464   -9999.000000   -9999.000000       0.078200       0.301000
54223     54223     neimenggu      120.6406       42.8339           69       203     2012      03        06        066              0.000000      -0.664215       0.000000       0.157893   -9999.000000   -9999.000000       0.063900       0.048000
54223     54223     neimenggu      120.6406       42.8339           69       203     2012      03        07        067              0.000000      -3.961853       0.000000       0.117240   -9999.000000       0.031000       0.056400       0.033000
54223     54223     neimenggu      120.6406       42.8339           69       203     2012      03        08        068              0.000000      -4.853760       0.000000       0.111714   -9999.000000   -9999.000000       0.049000   -9999.000000
54223     54223     neimenggu      120.6406       42.8339           69       203     2012      03        09        069              0.000000      -7.505615       0.000000       0.092649   -9999.000000       0.195500       0.055400       0.130000
54223     54223     neimenggu      120.6406       42.8339           69       203     2012      03        10        070              0.000000      -5.819672       0.000000       0.099375   -9999.000000   -9999.000000       0.053600       0.152000
54223     54223     neimenggu      120.6406       42.8339           69       203     2012      03        11        071              0.000000      -7.854828       0.000000       0.091964   -9999.000000   -9999.000000       0.055400       0.044000
54223     54223     neimenggu      120.6406       42.8339           69       203     2012      03        12        072              0.000000      -6.091156       0.000000       0.098139       0.117000       0.049300       0.078500       0.148000
54223     54223     neimenggu      120.6406       42.8339           69       203     2012      03        13        073              0.000000      -3.117035       0.000000       0.119490       0.127000   -9999.000000       0.060700   -9999.000000
54223     54223     neimenggu      120.6406       42.8339           69       203     2012      03        14        074              0.000000      -0.011047       0.000000       0.162876       0.131000   -9999.000000       0.070600       0.384000
54223     54223     neimenggu      120.6406       42.8339           69       203     2012      03        15        075              0.000000       0.748901       0.238883       0.173298   -9999.000000   -9999.000000       0.105600       0.487000
54223     54223     neimenggu      120.6406       42.8339           69       203     2012      03        16        076              0.000000       3.181458       0.000000       0.218468   -9999.000000       0.098200       0.095000       0.460000
54223     54223     neimenggu      120.6406       42.8339           69       203     2012      03        17        077              0.000000       4.533295       0.801946       0.219309   -9999.000000       0.089700       0.068800       0.062000
54223     54223     neimenggu      120.6406       42.8339           69       203     2012      03        18        078              0.000000      -3.320648       1.475517       0.143757       0.125000   -9999.000000       0.071900   -9999.000000
54223     54223     neimenggu      120.6406       42.8339           69       203     2012      03        19        079              0.000000      -3.558990       0.000000       0.115030       0.114000   -9999.000000       0.065300       0.148000
54223     54223     neimenggu      120.6406       42.8339           69       203     2012      03        20        080              0.000000       0.281250       0.000000       0.166707       0.106000   -9999.000000       0.068000       0.150000
54223     54223     neimenggu      120.6406       42.8339           69       203     2012      03        21        081              0.000000       1.661621       0.274399       0.186828   -9999.000000   -9999.000000   -9999.000000       0.232000
54223     54223     neimenggu      120.6406       42.8339           69       203     2012      03        22        082              0.000000       3.069244       0.187501       0.204909       0.110000   -9999.000000       0.075200       0.102000
54223     54223     neimenggu      120.6406       42.8339           69       203     2012      03        23        083              0.000000       3.071564       0.000000       0.210658   -9999.000000       0.001900       0.096400       0.278000
54223     54223     neimenggu      120.6406       42.8339           69       203     2012      03        24        084              0.000000       1.175171       4.504328       0.192177       0.132000       0.010000   -9999.000000       0.250000
54223     54223     neimenggu      120.6406       42.8339           69       203     2012      03        25        085              0.000000       1.634705       1.733421       0.190416       0.104000   -9999.000000       0.061900       0.133000
54223     54223     neimenggu      120.6406       42.8339           69       203     2012      03        26        086              0.000000       1.742249       0.000000       0.192974       0.103000   -9999.000000       0.070000   -9999.000000
54223     54223     neimenggu      120.6406       42.8339           69       203     2012      03        27        087              0.000000       5.300293       0.000000       0.232650       0.108000   -9999.000000       0.070000       0.145000
54223     54223     neimenggu      120.6406       42.8339           69       203     2012      03        28        088              0.000000       7.317902       0.000000       0.233712       0.103500       0.087600       0.074100       0.133000
54223     54223     neimenggu      120.6406       42.8339           69       203     2012      03        29        089              0.000000       9.846588       0.000000       0.239504       0.100000   -9999.000000       0.080100   -9999.000000
54223     54223     neimenggu      120.6406       42.8339           69       203     2012      03        30        090              0.000000       7.630737       0.000000       0.227342       0.091000       0.030000       0.079800       0.096000
54223     54223     neimenggu      120.6406       42.8339           69       203     2012      03        31        091              0.000000       3.510132       0.000000       0.201604   -9999.000000   -9999.000000       0.081200   -9999.000000
54223     54223     neimenggu      120.6406       42.8339           69       203     2012      04        01        092              0.000000       1.615997       2.068341       0.182977   -9999.000000       0.058300       0.082400   -9999.000000
54223     54223     neimenggu      120.6406       42.8339           69       203     2012      04        02        093              0.000000       2.509735       0.000000       0.196472       0.118000   -9999.000000       0.080500       0.050000
54223     54223     neimenggu      120.6406       42.8339           69       203     2012      04        03        094              0.000000       3.541931       0.000000       0.202282       0.100000       0.028200       0.086700       0.012000
54223     54223     neimenggu      120.6406       42.8339           69       203     2012      04        04        095              0.000000       4.676208       0.000000       0.228242       0.091000   -9999.000000       0.096600       0.129000
54223     54223     neimenggu      120.6406       42.8339           69       203     2012      04        05        096              0.000000       5.259766       0.000000       0.223685   -9999.000000   -9999.000000       0.077300       0.066000
54223     54223     neimenggu      120.6406       42.8339           69       203     2012      04        06        097              0.000000       4.181641       0.000000       0.205932   -9999.000000   -9999.000000       0.084700   -9999.000000
54223     54223     neimenggu      120.6406       42.8339           69       203     2012      04        07        098              0.000000       3.677155       0.000000       0.211683       0.105500   -9999.000000   -9999.000000       0.021000
54223     54223     neimenggu      120.6406       42.8339           69       203     2012      04        08        099              0.000000       9.155701       0.000000       0.231354       0.101000       0.021600       0.085200       0.014000
54223     54223     neimenggu      120.6406       42.8339           69       203     2012      04        09        100              0.000000       8.620728       0.000000       0.229304       0.095000   -9999.000000       0.092700       0.177000
54223     54223     neimenggu      120.6406       42.8339           69       203     2012      04        10        101              0.000000      13.392578       0.486213       0.225946       0.094500       0.024900       0.080300       0.123000
54223     54223     neimenggu      120.6406       42.8339           69       203     2012      04        11        102              0.000000       9.364502       3.908275       0.224913       0.097000       0.009000       0.081500   -9999.000000
54223     54223     neimenggu      120.6406       42.8339           69       203     2012      04        12        103              0.000000       9.309540       0.000000       0.226398       0.103500       0.073800       0.087900       0.072000
54223     54223     neimenggu      120.6406       42.8339           69       203     2012      04        13        104              0.000000      10.522369       0.000000       0.224553       0.097000   -9999.000000       0.081700       0.153000
54223     54223     neimenggu      120.6406       42.8339           69       203     2012      04        14        105              0.000000      14.059998       0.000000       0.220017       0.104000       0.052900       0.087100       0.050000
54223     54223     neimenggu      120.6406       42.8339           69       203     2012      04        15        106              0.000000      13.676880       0.348462       0.216839       0.086500       0.055200       0.087600       0.127000
54223     54223     neimenggu      120.6406       42.8339           69       203     2012      04        16        107              0.000000       9.330170       0.000000       0.216449       0.091000   -9999.000000       0.083600   -9999.000000
54223     54223     neimenggu      120.6406       42.8339           69       203     2012      04        17        108              0.000000      11.102112       0.000000       0.214881       0.100500       0.096800   -9999.000000       0.107000
54223     54223     neimenggu      120.6406       42.8339           69       203     2012      04        18        109              0.000000      16.002899       0.000000       0.209842       0.100500       0.051300       0.089800       0.220000
54223     54223     neimenggu      120.6406       42.8339           69       203     2012      04        19        110              0.000000      18.082397       0.276543       0.204016       0.095000   -9999.000000       0.093800       0.170000
54223     54223     neimenggu      120.6406       42.8339           69       203     2012      04        20        111              0.000000      14.489929       0.000000       0.206313       0.100000       0.005900   -9999.000000       0.203000
54223     54223     neimenggu      120.6406       42.8339           69       203     2012      04        21        112              0.000000      15.532349       0.000000       0.210055       0.105000   -9999.000000       0.098200       0.015000
54223     54223     neimenggu      120.6406       42.8339           69       203     2012      04        22        113              0.000000      14.514404       0.000000       0.211635       0.099000   -9999.000000       0.084400       0.095000
54223     54223     neimenggu      120.6406       42.8339           69       203     2012      04        23        114              0.000000      17.007568       1.275635       0.208923       0.105500   -9999.000000       0.092400       0.233000
54223     54223     neimenggu      120.6406       42.8339           69       203     2012      04        24        115              0.000000      18.911591      25.360474       0.209795       0.185000   -9999.000000       0.187700   -9999.000000
54223     54223     neimenggu      120.6406       42.8339           69       203     2012      04        25        116              0.000000      12.234436       0.000000       0.297452       0.182000       0.124400       0.139900       0.442000
54223     54223     neimenggu      120.6406       42.8339           69       203     2012      04        26        117              0.000000       9.765747       0.000000       0.291756       0.130000       0.154700       0.100200       0.369000
54223     54223     neimenggu      120.6406       42.8339           69       203     2012      04        27        118              0.000000      13.328705       0.000000       0.271119       0.111000       0.106700   -9999.000000   -9999.000000
54223     54223     neimenggu      120.6406       42.8339           69       203     2012      04        28        119              0.000000      10.486908       2.577246       0.260966       0.111500       0.320900       0.088500       0.177000
54223     54223     neimenggu      120.6406       42.8339           69       203     2012      04        29        120              0.000000      10.957184       0.060937       0.254315       0.095000       0.139200       0.092900       0.244000
54223     54223     neimenggu      120.6406       42.8339           69       203     2012      04        30        121              0.000000      15.287659       0.000000       0.248488       0.091000       0.184200       0.080200       0.156000
54223     54223     neimenggu      120.6406       42.8339           69       203     2012      05        01        122              0.000000      17.128662       1.934847       0.243959       0.085000       0.018500       0.074200       0.084000
54223     54223     neimenggu      120.6406       42.8339           69       203     2012      05        02        123              0.000000      16.264099       0.000000       0.243975       0.101000   -9999.000000       0.081600       0.223000
54223     54223     neimenggu      120.6406       42.8339           69       203     2012      05        03        124              0.000000      15.699799       0.000000       0.250382       0.097500   -9999.000000       0.072100       0.264000
54223     54223     neimenggu      120.6406       42.8339           69       203     2012      05        04        125              0.000000      20.159241       0.000000       0.239030       0.093000       0.047300       0.074600       0.210000
54223     54223     neimenggu      120.6406       42.8339           69       203     2012      05        05        126              0.000000      17.960358       0.175616       0.230915       0.089000   -9999.000000       0.073700   -9999.000000
54223     54223     neimenggu      120.6406       42.8339           69       203     2012      05        06        127              0.000000      16.618011       0.000000       0.225058       0.087500   -9999.000000       0.074200       0.087000
54223     54223     neimenggu      120.6406       42.8339           69       203     2012      05        07        128              0.000000      16.846008       0.000000       0.220962   -9999.000000   -9999.000000       0.072400       0.255000
54223     54223     neimenggu      120.6406       42.8339           69       203     2012      05        08        129              0.000000      16.943054       0.000000       0.220883       0.100000       0.027300       0.084900       0.254000
54223     54223     neimenggu      120.6406       42.8339           69       203     2012      05        09        130              0.000000      18.274078       0.232635       0.217636       0.095500   -9999.000000       0.071700       0.276000
54223     54223     neimenggu      120.6406       42.8339           69       203     2012      05        10        131              0.000000      20.904022       0.000000       0.211921       0.082000   -9999.000000       0.079300   -9999.000000
54223     54223     neimenggu      120.6406       42.8339           69       203     2012      05        11        132              0.000000      19.914642       1.183892       0.207272       0.100500   -9999.000000       0.096500       0.188000
54223     54223     neimenggu      120.6406       42.8339           69       203     2012      05        12        133              0.000000      17.527924       5.306827       0.219296       0.166000   -9999.000000       0.156800       0.650000
54223     54223     neimenggu      120.6406       42.8339           69       203     2012      05        13        134              0.000000      14.047607       5.084058       0.260046   -9999.000000   -9999.000000       0.170700       0.447000
54223     54223     neimenggu      120.6406       42.8339           69       203     2012      05        14        135              0.000000      14.424500       0.000000       0.268832       0.113000       0.266200       0.084400       0.372000
54223     54223     neimenggu      120.6406       42.8339           69       203     2012      05        15        136              0.000000      14.417877       0.198910       0.252755       0.095000       0.091900       0.073200   -9999.000000
54223     54223     neimenggu      120.6406       42.8339           69       203     2012      05        16        137              0.000000      14.684052       3.082594       0.243930       0.158000       0.141000       0.116300       0.099000
54223     54223     neimenggu      120.6406       42.8339           69       203     2012      05        17        138              0.000000      12.842194       0.000000       0.259009       0.107000       0.210100       0.070700       0.312000
54223     54223     neimenggu      120.6406       42.8339           69       203     2012      05        18        139              0.000000      18.122955       0.000000       0.246087       0.093000       0.108000       0.070900       0.232000
54223     54223     neimenggu      120.6406       42.8339           69       203     2012      05        19        140              0.000000      22.143219       0.257603       0.232552       0.092500       0.006600       0.072400       0.352000
54223     54223     neimenggu      120.6406       42.8339           69       203     2012      05        20        141              0.000000      18.568268       0.308151       0.228618       0.077000   -9999.000000       0.066200       0.178000
54223     54223     neimenggu      120.6406       42.8339           69       203     2012      05        21        142              0.000000      20.991943       0.000000       0.224665       0.088000       0.083300       0.085100       0.243000
54223     54223     neimenggu      120.6406       42.8339           69       203     2012      05        22        143              0.000000      23.462769       0.477474       0.213857       0.088500   -9999.000000   -9999.000000       0.317000
54223     54223     neimenggu      120.6406       42.8339           69       203     2012      05        23        144              0.000000      18.518707       0.000000       0.217991   -9999.000000   -9999.000000       0.075600   -9999.000000
54223     54223     neimenggu      120.6406       42.8339           69       203     2012      05        24        145              0.000000      18.623688       0.000000       0.209650       0.100000       0.010800       0.080500       0.076000
54223     54223     neimenggu      120.6406       42.8339           69       203     2012      05        25        146              0.000000      17.483368       0.000000       0.203534       0.097000   -9999.000000       0.083100       0.119000
54223     54223     neimenggu      120.6406       42.8339           69       203     2012      05        26        147              0.000000      19.378571       0.381729       0.198114       0.068000   -9999.000000       0.073100   -9999.000000
54223     54223     neimenggu      120.6406       42.8339           69       203     2012      05        27        148              0.000000      18.796265       0.000000       0.200812       0.085500   -9999.000000       0.085200       0.297000
54223     54223     neimenggu      120.6406       42.8339           69       203     2012      05        28        149              0.000000      21.447754       0.000000       0.193171       0.089000   -9999.000000       0.076800       0.288000
54223     54223     neimenggu      120.6406       42.8339           69       203     2012      05        29        150              0.000000      25.290588       6.584353       0.184241       0.151000   -9999.000000       0.075900       0.336000
54223     54223     neimenggu      120.6406       42.8339           69       203     2012      05        30        151              0.000000      21.533508       0.194506       0.206111       0.106500   -9999.000000       0.081800   -9999.000000
54223     54223     neimenggu      120.6406       42.8339           69       203     2012      05        31        152              0.000000      18.821564       0.146178       0.234477       0.078000   -9999.000000   -9999.000000   -9999.000000
54223     54223     neimenggu      120.6406       42.8339           69       203     2012      06        01        153              0.000000      20.227142      21.659264       0.215831       0.155000   -9999.000000       0.166500       0.565000
54223     54223     neimenggu      120.6406       42.8339           69       203     2012      06        02        154              0.000000      18.363708       0.327596       0.267045       0.181000       0.137200       0.119200       0.558000
54223     54223     neimenggu      120.6406       42.8339           69       203     2012      06        03        155              0.000000      18.509827       0.212978       0.282225       0.154000       0.111200       0.113600   -9999.000000
54223     54223     neimenggu      120.6406       42.8339           69       203     2012      06        04        156              0.000000      17.435944       2.124858       0.269131       0.132000       0.130700       0.096800       0.429000
54223     54223     neimenggu      120.6406       42.8339           69       203     2012      06        05        157              0.000000      19.604584       0.000000       0.261572       0.096000       0.040000       0.081400       0.334000
54223     54223     neimenggu      120.6406       42.8339           69       203     2012      06        06        158              0.000000      22.213104       1.168980       0.248360       0.096500   -9999.000000       0.073500       0.297000
54223     54223     neimenggu      120.6406       42.8339           69       203     2012      06        07        159              0.000000      23.009888       0.000000       0.240653       0.080000       0.341700       0.076900       0.411000
54223     54223     neimenggu      120.6406       42.8339           69       203     2012      06        08        160              0.000000      24.245056       0.219201       0.230295       0.116000       0.029900   -9999.000000   -9999.000000
54223     54223     neimenggu      120.6406       42.8339           69       203     2012      06        09        161              0.000000      24.308228      10.538432       0.222435       0.137500       0.046800       0.099300       0.280000
54223     54223     neimenggu      120.6406       42.8339           69       203     2012      06        10        162              0.000000      22.336670       0.271775       0.271513       0.095000       0.181800       0.084300       0.355000
54223     54223     neimenggu      120.6406       42.8339           69       203     2012      06        11        163              0.000000      19.841583       2.072617       0.253734       0.097000       0.027400       0.112900       0.312000
54223     54223     neimenggu      120.6406       42.8339           69       203     2012      06        12        164              0.000000      18.611084       0.129148       0.251281       0.096500       0.210800       0.074500       0.424000
54223     54223     neimenggu      120.6406       42.8339           69       203     2012      06        13        165              0.000000      18.636017      31.389984       0.248766   -9999.000000       0.009200       0.175500   -9999.000000
54223     54223     neimenggu      120.6406       42.8339           69       203     2012      06        14        166              0.000000      18.145447       8.388354       0.307145       0.226000       0.281500       0.167800       0.955000
54223     54223     neimenggu      120.6406       42.8339           69       203     2012      06        15        167              0.000000      16.477325       1.950673       0.319222       0.237000   -9999.000000       0.170200       0.961000
54223     54223     neimenggu      120.6406       42.8339           69       203     2012      06        16        168              0.000000      16.988434       2.611024       0.300267       0.154000       0.180300       0.110600       0.815000
54223     54223     neimenggu      120.6406       42.8339           69       203     2012      06        17        169              0.000000      21.003662       0.312435       0.290531       0.134500       0.222300       0.093200       0.572000
54223     54223     neimenggu      120.6406       42.8339           69       203     2012      06        18        170              0.000000      23.619202       0.000000       0.282198       0.121000   -9999.000000       0.082000       0.601000
54223     54223     neimenggu      120.6406       42.8339           69       203     2012      06        19        171              0.000000      24.112854       0.000000       0.270095       0.107000       0.079500       0.081600       0.518000
54223     54223     neimenggu      120.6406       42.8339           69       203     2012      06        20        172              0.000000      25.056976       0.000000       0.261122       0.104500   -9999.000000       0.077900       0.515000
54223     54223     neimenggu      120.6406       42.8339           69       203     2012      06        21        173              0.000000      25.819031       0.299919       0.253572       0.105000   -9999.000000       0.080700   -9999.000000
54223     54223     neimenggu      120.6406       42.8339           69       203     2012      06        22        174              0.000000      25.616089       3.458141       0.246397       0.110000       0.115100       0.083300       0.536000
54223     54223     neimenggu      120.6406       42.8339           69       203     2012      06        23        175              0.000000      24.547180       0.000000       0.258819       0.107000       0.167800       0.065200       0.491000
54223     54223     neimenggu      120.6406       42.8339           69       203     2012      06        24        176              0.000000      25.594513       0.367364       0.250710       0.100000   -9999.000000       0.072800   -9999.000000
54223     54223     neimenggu      120.6406       42.8339           69       203     2012      06        25        177              0.000000      25.763641       0.232052       0.244458       0.106000       0.129000   -9999.000000       0.539000
54223     54223     neimenggu      120.6406       42.8339           69       203     2012      06        26        178              0.000000      24.696075       0.000000       0.239810       0.094000       0.136900       0.073900       0.513000
54223     54223     neimenggu      120.6406       42.8339           69       203     2012      06        27        179              0.000000      26.446259       0.000000       0.229772       0.088000       0.031800       0.074700       0.447000
54223     54223     neimenggu      120.6406       42.8339           69       203     2012      06        28        180              0.000000      27.108856       1.154138       0.220780       0.084500       0.220800       0.064000       0.419000
54223     54223     neimenggu      120.6406       42.8339           69       203     2012      06        29        181              0.000000      24.288940       0.421574       0.221751       0.107000       0.043300       0.069200   -9999.000000
54223     54223     neimenggu      120.6406       42.8339           69       203     2012      06        30        182              0.000000      23.202576       0.000000       0.232837       0.103000       0.190800       0.073200   -9999.000000
54223     54223     neimenggu      120.6406       42.8339           69       203     2012      07        01        183              0.000000      27.065155       0.000000       0.216382       0.097000       0.022800       0.069700       0.555000
54223     54223     neimenggu      120.6406       42.8339           69       203     2012      07        02        184              0.000000      25.624847       0.270907       0.204210       0.094000       0.028800       0.077100   -9999.000000
54223     54223     neimenggu      120.6406       42.8339           69       203     2012      07        03        185              0.000000      23.967316       1.828306       0.203339       0.110000       0.265100       0.080000       0.455000
54223     54223     neimenggu      120.6406       42.8339           69       203     2012      07        04        186              0.000000      22.917358       0.000000       0.221848       0.106000       0.100700       0.071900       0.521000
54223     54223     neimenggu      120.6406       42.8339           69       203     2012      07        05        187              0.000000      26.071991       0.000000       0.208040       0.119000       0.178100       0.084200       0.517000
54223     54223     neimenggu      120.6406       42.8339           69       203     2012      07        06        188              0.000000      27.047699       0.000000       0.198523   -9999.000000   -9999.000000       0.073200       0.580000
54223     54223     neimenggu      120.6406       42.8339           69       203     2012      07        07        189              0.000000      28.692108       9.620337       0.188413   -9999.000000   -9999.000000       0.071100   -9999.000000
54223     54223     neimenggu      120.6406       42.8339           69       203     2012      07        08        190              0.000000      29.219604       0.937780       0.211623       0.108000       0.267900       0.082700       0.610000
54223     54223     neimenggu      120.6406       42.8339           69       203     2012      07        09        191              0.000000      28.005951       0.126690       0.248596       0.127000       0.109500       0.091700       0.630000
54223     54223     neimenggu      120.6406       42.8339           69       203     2012      07        10        192              0.000000      26.950165      14.092078       0.229203       0.178000       0.027100       0.122400       1.000000
54223     54223     neimenggu      120.6406       42.8339           69       203     2012      07        11        193              0.000000      21.559570       2.876804       0.289015       0.205500       0.130500       0.127600       0.915000
54223     54223     neimenggu      120.6406       42.8339           69       203     2012      07        12        194              0.000000      20.824615       7.558269       0.277411       0.207000       0.161700       0.129400   -9999.000000
54223     54223     neimenggu      120.6406       42.8339           69       203     2012      07        13        195              0.000000      21.128326       0.000000       0.294210       0.136000       0.239500       0.097300       0.788000
54223     54223     neimenggu      120.6406       42.8339           69       203     2012      07        14        196              0.000000      23.087219       0.000000       0.269651       0.111500       0.169300       0.086100       0.633000
54223     54223     neimenggu      120.6406       42.8339           69       203     2012      07        15        197              0.000000      24.930267       0.000000       0.254677   -9999.000000       0.031300       0.075400       0.539000
54223     54223     neimenggu      120.6406       42.8339           69       203     2012      07        16        198              0.000000      25.995148       0.000000       0.242585       0.113500       0.027500       0.075000       0.556000
54223     54223     neimenggu      120.6406       42.8339           69       203     2012      07        17        199              0.000000      27.541473       0.000000       0.232042       0.105000   -9999.000000       0.077800       0.500000
54223     54223     neimenggu      120.6406       42.8339           69       203     2012      07        18        200              0.000000      27.480957       0.000000       0.222266       0.098000   -9999.000000       0.070400       0.559000
54223     54223     neimenggu      120.6406       42.8339           69       203     2012      07        19        201              0.000000      27.434723       0.225486       0.216674       0.105500   -9999.000000       0.068000       0.607000
54223     54223     neimenggu      120.6406       42.8339           69       203     2012      07        20        202              0.123000      28.497467       6.277063       0.210670       0.148000   -9999.000000       0.067900   -9999.000000
54223     54223     neimenggu      120.6406       42.8339           69       203     2012      07        21        203              0.126167      27.544769      14.051928       0.245396   -9999.000000       0.107100       0.093200       0.579000
54223     54223     neimenggu      120.6406       42.8339           69       203     2012      07        22        204              0.243208      26.626068      33.232880       0.268458       0.258500       0.154700       0.133300       1.000000
54223     54223     neimenggu      120.6406       42.8339           69       203     2012      07        23        205              0.223000      21.688232       0.000000       0.333791       0.190000       0.291500   -9999.000000   -9999.000000
54223     54223     neimenggu      120.6406       42.8339           69       203     2012      07        24        206              0.210875      25.798523       0.421765       0.291244       0.162500   -9999.000000       0.109500       0.625000
54223     54223     neimenggu      120.6406       42.8339           69       203     2012      07        25        207              0.199708      25.520874       0.000000       0.280832       0.142000       0.050300       0.107000       0.568000
54223     54223     neimenggu      120.6406       42.8339           69       203     2012      07        26        208              0.199583      27.406830       4.282429       0.270130       0.193000   -9999.000000       0.131200       0.946000
54223     54223     neimenggu      120.6406       42.8339           69       203     2012      07        27        209              0.193167      26.287323       0.316499       0.278112       0.161500       0.109300       0.092000       0.641000
54223     54223     neimenggu      120.6406       42.8339           69       203     2012      07        28        210              0.183000      26.669769       0.276204       0.263978       0.157000       0.120800       0.101600       0.630000
54223     54223     neimenggu      120.6406       42.8339           69       203     2012      07        29        211              0.169333      25.983978       0.026813       0.260710       0.153000       0.017800       0.100100       0.512000
54223     54223     neimenggu      120.6406       42.8339           69       203     2012      07        30        212              0.154750      24.093689       0.000000       0.252562       0.131500       0.113700       0.095400       0.563000
54223     54223     neimenggu      120.6406       42.8339           69       203     2012      07        31        213              0.145833      24.943298       0.235258       0.244403       0.144000       0.274100       0.094600   -9999.000000
54223     54223     neimenggu      120.6406       42.8339           69       203     2012      08        01        214              0.158000      23.685455      25.476059       0.242375       0.169000       0.016300       0.142200       0.497000
54223     54223     neimenggu      120.6406       42.8339           69       203     2012      08        02        215              0.209167      23.456299       0.000000       0.281608       0.226000       0.122000       0.115100       0.816000
54223     54223     neimenggu      120.6406       42.8339           69       203     2012      08        03        216              0.195083      22.832001       0.173322       0.299910       0.175000       0.152800       0.112700       0.625000
54223     54223     neimenggu      120.6406       42.8339           69       203     2012      08        04        217              0.185917      24.103516      15.770407       0.281418       0.171000       0.125300       0.102500       0.696000
54223     54223     neimenggu      120.6406       42.8339           69       203     2012      08        05        218              0.169792      24.521362       0.000000       0.319030       0.192000       0.141000       0.088200   -9999.000000
54223     54223     neimenggu      120.6406       42.8339           69       203     2012      08        06        219              0.152708      26.776703       0.000000       0.281135       0.174000       0.036800       0.095400       0.619000
54223     54223     neimenggu      120.6406       42.8339           69       203     2012      08        07        220              0.139250      27.320526       0.082705       0.268812       0.157500   -9999.000000   -9999.000000       0.555000
54223     54223     neimenggu      120.6406       42.8339           69       203     2012      08        08        221              0.135833      28.775726       2.809331       0.259197       0.142000       0.087000       0.113700       0.573000
54223     54223     neimenggu      120.6406       42.8339           69       203     2012      08        09        222              0.131708      25.381805       0.000000       0.271454       0.127000       0.085200   -9999.000000       0.584000
54223     54223     neimenggu      120.6406       42.8339           69       203     2012      08        10        223              0.144250      26.201965       4.147896       0.257000       0.120000       0.309100       0.081700   -9999.000000
54223     54223     neimenggu      120.6406       42.8339           69       203     2012      08        11        224              0.152792      26.362427       9.106865       0.253238   -9999.000000   -9999.000000       0.094000       0.691000
54223     54223     neimenggu      120.6406       42.8339           69       203     2012      08        12        225              0.157000      21.896362       0.089097       0.284996       0.196500       0.128300       0.104700       0.680000
54223     54223     neimenggu      120.6406       42.8339           69       203     2012      08        13        226              0.153435      20.601532       0.000000       0.280086       0.165000       0.099200       0.113700       0.537000
54223     54223     neimenggu      120.6406       42.8339           69       203     2012      08        14        227              0.151000      22.882782       0.600494       0.263182       0.142000       0.047400       0.130900       0.463000
54223     54223     neimenggu      120.6406       42.8339           69       203     2012      08        15        228              0.150583      22.824219       0.043896       0.256122       0.149500   -9999.000000       0.115500       0.454000
54223     54223     neimenggu      120.6406       42.8339           69       203     2012      08        16        229              0.150083      24.030914       0.000000       0.251421       0.163000   -9999.000000       0.107900       0.522000
54223     54223     neimenggu      120.6406       42.8339           69       203     2012      08        17        230              0.148667      25.346436       0.083205       0.241534       0.153000       0.055600       0.120800       0.577000
54223     54223     neimenggu      120.6406       42.8339           69       203     2012      08        18        231              0.148000      25.307251       5.611611       0.237252       0.168000       0.177700       0.107900   -9999.000000
54223     54223     neimenggu      120.6406       42.8339           69       203     2012      08        19        232              0.147167      24.415497       0.000000       0.250081       0.178000       0.038300       0.114900       0.462000
54223     54223     neimenggu      120.6406       42.8339           69       203     2012      08        20        233              0.146000      23.698029       0.337014       0.245211       0.160000       0.106200       0.124600       0.446000
54223     54223     neimenggu      120.6406       42.8339           69       203     2012      08        21        234              0.146000      22.082062       0.349027       0.237260       0.145500       0.097000       0.099500   -9999.000000
54223     54223     neimenggu      120.6406       42.8339           69       203     2012      08        22        235              0.146000      19.981354       0.000000       0.233320       0.157000   -9999.000000       0.101300   -9999.000000
54223     54223     neimenggu      120.6406       42.8339           69       203     2012      08        23        236              0.146000      19.701477       0.000000       0.227060       0.169500   -9999.000000       0.111800       0.389000
54223     54223     neimenggu      120.6406       42.8339           69       203     2012      08        24        237              0.146000      23.090149       0.000000       0.220877       0.157000       0.010200       0.105000   -9999.000000
54223     54223     neimenggu      120.6406       42.8339           69       203     2012      08        25        238              0.000000      23.906250       0.000000       0.215177       0.162000   -9999.000000       0.119200   -9999.000000
54223     54223     neimenggu      120.6406       42.8339           69       203     2012      08        26        239              0.146000      24.574615       0.000000       0.208167       0.137500   -9999.000000   -9999.000000       0.467000
54223     54223     neimenggu      120.6406       42.8339           69       203     2012      08        27        240              0.146000      23.986786       0.000000       0.207663       0.149000   -9999.000000       0.090400       0.403000
54223     54223     neimenggu      120.6406       42.8339           69       203     2012      08        28        241              0.146000      24.394867       0.645728       0.206898       0.161500       0.211300       0.101600       0.497000
54223     54223     neimenggu      120.6406       42.8339           69       203     2012      08        29        242              0.146000      24.941040       0.000000       0.207802       0.166000   -9999.000000       0.088300   -9999.000000
54223     54223     neimenggu      120.6406       42.8339           69       203     2012      08        30        243              0.146000      23.727081       0.000000       0.197652       0.136000   -9999.000000       0.091800       0.315000
54223     54223     neimenggu      120.6406       42.8339           69       203     2012      08        31        244              0.146000      26.581116       0.000000       0.189981       0.141000       0.273100       0.105300       0.446000
54223     54223     neimenggu      120.6406       42.8339           69       203     2012      09        01        245              0.146000      27.425690       0.391496       0.183026       0.144000       0.049000       0.096300       0.469000
54223     54223     neimenggu      120.6406       42.8339           69       203     2012      09        02        246              0.185292      27.956573      37.175987       0.178358       0.234000       0.283000       0.134300       0.956000
54223     54223     neimenggu      120.6406       42.8339           69       203     2012      09        03        247              0.209292      18.253082       1.055424       0.309651       0.218000       0.128300       0.120400   -9999.000000
54223     54223     neimenggu      120.6406       42.8339           69       203     2012      09        04        248              0.198333      17.189209       0.339801       0.291763       0.156000       0.074000       0.082000       0.556000
54223     54223     neimenggu      120.6406       42.8339           69       203     2012      09        05        249              0.191625      16.628998       0.000000       0.275565       0.136000       0.124400       0.096800       0.512000
54223     54223     neimenggu      120.6406       42.8339           69       203     2012      09        06        250              0.185458      19.583740       0.000000       0.263869       0.131000       0.114200       0.079900       0.494000
54223     54223     neimenggu      120.6406       42.8339           69       203     2012      09        07        251              0.180625      22.040466       0.000000       0.255867       0.151000       0.020300       0.077000       0.425000
54223     54223     neimenggu      120.6406       42.8339           69       203     2012      09        08        252              0.176458      21.350494       0.000000       0.250784       0.156000       0.140000       0.084500   -9999.000000
54223     54223     neimenggu      120.6406       42.8339           69       203     2012      09        09        253              0.171667      20.351715       0.000000       0.247966       0.154000   -9999.000000       0.083700       0.447000
54223     54223     neimenggu      120.6406       42.8339           69       203     2012      09        10        254              0.166542      22.756989       0.000000       0.241950       0.136000   -9999.000000       0.064400       0.500000
54223     54223     neimenggu      120.6406       42.8339           69       203     2012      09        11        255              0.203833      24.291962      56.996140       0.236704       0.107000       0.080300       0.101500       0.464000
54223     54223     neimenggu      120.6406       42.8339           69       203     2012      09        12        256              0.260625      22.360901       2.402804       0.306749       0.220000       0.283200       0.119700       0.702000
54223     54223     neimenggu      120.6406       42.8339           69       203     2012      09        13        257              0.241250      15.147919       0.000000       0.322952       0.162000       0.260700       0.091500       0.706000
54223     54223     neimenggu      120.6406       42.8339           69       203     2012      09        14        258              0.233542      15.492279       0.000000       0.296231       0.155500       0.064500       0.091300       0.447000
54223     54223     neimenggu      120.6406       42.8339           69       203     2012      09        15        259              0.227833      17.071838       0.000000       0.286129   -9999.000000       0.173500       0.074700       0.537000
54223     54223     neimenggu      120.6406       42.8339           69       203     2012      09        16        260              0.223125      17.400513       0.000000       0.278721       0.126500       0.078000       0.072400   -9999.000000
54223     54223     neimenggu      120.6406       42.8339           69       203     2012      09        17        261              0.217542      17.118439       0.000000       0.272948       0.116000       0.047200       0.069800       0.467000
54223     54223     neimenggu      120.6406       42.8339           69       203     2012      09        18        262              0.212958      17.283142       0.000000       0.267791       0.138000       0.193900       0.064700       0.402000
54223     54223     neimenggu      120.6406       42.8339           69       203     2012      09        19        263              0.209208      17.540131       0.000000       0.263289       0.136000       0.026900       0.069100   -9999.000000
54223     54223     neimenggu      120.6406       42.8339           69       203     2012      09        20        264              0.204708      18.718994       0.000000       0.259794       0.123000       0.333300       0.067200       0.455000
54223     54223     neimenggu      120.6406       42.8339           69       203     2012      09        21        265              0.199375      20.236267       0.000000       0.256027   -9999.000000   -9999.000000       0.061900       0.415000
54223     54223     neimenggu      120.6406       42.8339           69       203     2012      09        22        266              0.195583      20.637878       0.000000       0.251662       0.094000       0.052100       0.070900       0.389000
54223     54223     neimenggu      120.6406       42.8339           69       203     2012      09        23        267              0.191125      20.441193       0.000000       0.249658       0.108000       0.189300       0.065200       0.458000
54223     54223     neimenggu      120.6406       42.8339           69       203     2012      09        24        268              0.186417      19.123871       0.000000       0.248396       0.112500       0.117800       0.062300       0.394000
54223     54223     neimenggu      120.6406       42.8339           69       203     2012      09        25        269              0.182417      18.784851       2.386535       0.245319       0.123000       0.022200       0.083500       0.641000
54223     54223     neimenggu      120.6406       42.8339           69       203     2012      09        26        270              0.179292      16.625122       0.000000       0.256971       0.098000   -9999.000000       0.073200       0.486000
54223     54223     neimenggu      120.6406       42.8339           69       203     2012      09        27        271              0.202857      17.270172      48.106300       0.251743       0.117000       0.059900       0.072200   -9999.000000
54223     54223     neimenggu      120.6406       42.8339           69       203     2012      09        28        272              0.275000      13.645569      28.841753       0.324962       0.198000   -9999.000000       0.121600       1.000000
54223     54223     neimenggu      120.6406       42.8339           69       203     2012      09        29        273              0.257000       9.141663       0.035716       0.342605   -9999.000000   -9999.000000       0.092400       0.754000
54223     54223     neimenggu      120.6406       42.8339           69       203     2012      09        30        274              0.249208      11.224731       0.000000       0.305814       0.143500   -9999.000000       0.081100       0.549000
54223     54223     neimenggu      120.6406       42.8339           69       203     2012      10        01        275              0.243958      12.688507       0.000000       0.294981       0.107000   -9999.000000       0.076900       0.661000
54223     54223     neimenggu      120.6406       42.8339           69       203     2012      10        02        276              0.222208      14.718170       0.000000       0.287329       0.105000       0.083200       0.062900   -9999.000000
54223     54223     neimenggu      120.6406       42.8339           69       203     2012      10        03        277              0.211625      16.701172       0.000000       0.282041       0.107000       0.306600       0.065700       0.562000
54223     54223     neimenggu      120.6406       42.8339           69       203     2012      10        04        278              0.205583      14.248962       0.000000       0.276006       0.109000       0.051200       0.069500       0.600000
54223     54223     neimenggu      120.6406       42.8339           69       203     2012      10        05        279              0.201083      13.760681       0.000000       0.271710       0.115500       0.038200       0.066200       0.737000
54223     54223     neimenggu      120.6406       42.8339           69       203     2012      10        06        280              0.198583      12.094849       0.000000       0.268376       0.113000       0.168000       0.068000       0.621000
54223     54223     neimenggu      120.6406       42.8339           69       203     2012      10        07        281              0.196042      13.619019       0.000000       0.266263       0.102000       0.028000       0.073300   -9999.000000
54223     54223     neimenggu      120.6406       42.8339           69       203     2012      10        08        282              0.190250      15.507233       0.000000       0.264535       0.105500       0.260100       0.059900       0.447000
54223     54223     neimenggu      120.6406       42.8339           69       203     2012      10        09        283              0.201083      16.892700      10.920601       0.261872   -9999.000000   -9999.000000       0.104000       0.787000
54223     54223     neimenggu      120.6406       42.8339           69       203     2012      10        10        284              0.197000      11.192413       0.000000       0.298756       0.133000       0.264800   -9999.000000       0.919000
54223     54223     neimenggu      120.6406       42.8339           69       203     2012      10        11        285              0.193458      10.639801       0.295587       0.279467       0.114500       0.067900       0.071600       0.698000
54223     54223     neimenggu      120.6406       42.8339           69       203     2012      10        12        286              0.189792      12.558563       0.000000       0.273738       0.110000       0.059700       0.077700       0.490000
54223     54223     neimenggu      120.6406       42.8339           69       203     2012      10        13        287              0.184125      12.954193       0.000000       0.270354       0.100000       0.255200       0.081100       0.466000
54223     54223     neimenggu      120.6406       42.8339           69       203     2012      10        14        288              0.180042       8.633575       0.000000       0.265466       0.080000       0.170700       0.063500       0.501000
54223     54223     neimenggu      120.6406       42.8339           69       203     2012      10        15        289              0.179000       7.512909       0.271788       0.263905       0.104000       0.049100       0.094800   -9999.000000
54223     54223     neimenggu      120.6406       42.8339           69       203     2012      10        16        290              0.208083      10.263763       6.780560       0.263600   -9999.000000       0.287300       0.112800       0.989000
54223     54223     neimenggu      120.6406       42.8339           69       203     2012      10        17        291              0.202542       7.272919       0.000000       0.287794       0.128000       0.106900       0.086600       0.799000
54223     54223     neimenggu      120.6406       42.8339           69       203     2012      10        18        292              0.196708       6.159241       0.000000       0.276181       0.115000       0.119000       0.080400   -9999.000000
54223     54223     neimenggu      120.6406       42.8339           69       203     2012      10        19        293              0.194250       5.973175       0.000000       0.270830       0.103500       0.093800       0.060500       0.588000
54223     54223     neimenggu      120.6406       42.8339           69       203     2012      10        20        294              0.190208       8.779144       1.008401       0.268155   -9999.000000   -9999.000000       0.058500       0.451000
54223     54223     neimenggu      120.6406       42.8339           69       203     2012      10        21        295              0.194875       6.127899       8.190622       0.266136   -9999.000000   -9999.000000       0.066500       0.706000
54223     54223     neimenggu      120.6406       42.8339           69       203     2012      10        22        296              0.210208       3.956207       8.929201       0.272258   -9999.000000   -9999.000000       0.054100       0.742000
54223     54223     neimenggu      120.6406       42.8339           69       203     2012      10        23        297              0.227292       3.317108       0.000000       0.305829   -9999.000000   -9999.000000       0.086000       0.730000
54223     54223     neimenggu      120.6406       42.8339           69       203     2012      10        24        298              0.227875       5.006256       0.000000       0.301448   -9999.000000   -9999.000000       0.098500       0.693000
54223     54223     neimenggu      120.6406       42.8339           69       203     2012      10        25        299              0.000000       7.906006       0.000000       0.286783       0.120000   -9999.000000       0.071500       0.713000
54223     54223     neimenggu      120.6406       42.8339           69       203     2012      10        26        300              0.220375       9.694244       0.000000       0.281792       0.108000       0.366100       0.067500   -9999.000000
54223     54223     neimenggu      120.6406       42.8339           69       203     2012      10        27        301              0.216833      11.982422       0.000000       0.278547       0.122000   -9999.000000   -9999.000000       0.659000
54223     54223     neimenggu      120.6406       42.8339           69       203     2012      10        28        302              0.000000       8.900146       1.615120       0.274694       0.103000       0.158900       0.066600       0.590000
54223     54223     neimenggu      120.6406       42.8339           69       203     2012      10        29        303              0.210167       4.364349       0.715473       0.271382   -9999.000000       0.346500       0.077700       0.479000
54223     54223     neimenggu      120.6406       42.8339           69       203     2012      10        30        304              0.208375       1.801636       0.000000       0.237053       0.104000       0.067300       0.050800       0.485000
54223     54223     neimenggu      120.6406       42.8339           69       203     2012      10        31        305              0.206083       1.690216       0.000000       0.224827   -9999.000000       0.287300       0.050200   -9999.000000
54223     54223     neimenggu      120.6406       42.8339           69       203     2012      11        01        306              0.205958       1.292755       0.000000       0.229564       0.118000       0.463300       0.062300       0.564000
54223     54223     neimenggu      120.6406       42.8339           69       203     2012      11        02        307              0.204625       1.797943       0.000000       0.237508       0.116000       0.066900       0.066200       0.450000
54223     54223     neimenggu      120.6406       42.8339           69       203     2012      11        03        308              0.205375       1.530182       1.632309       0.235465       0.104000       0.330600       0.063900       0.528000
54223     54223     neimenggu      120.6406       42.8339           69       203     2012      11        04        309              0.205417       1.697388       0.548294       0.248326   -9999.000000       0.051700       0.067200       0.578000
54223     54223     neimenggu      120.6406       42.8339           69       203     2012      11        05        310              0.209583       1.112610       0.000000       0.222424   -9999.000000   -9999.000000       0.040700   -9999.000000
54223     54223     neimenggu      120.6406       42.8339           69       203     2012      11        06        311              0.207958       0.278137       0.000000       0.200548   -9999.000000       0.053900       0.044300       0.530000
54223     54223     neimenggu      120.6406       42.8339           69       203     2012      11        07        312              0.210917      -0.389282       0.000000       0.168603       0.126000       0.008300       0.050900       0.519000
54223     54223     neimenggu      120.6406       42.8339           69       203     2012      11        08        313              0.212292       0.682739       0.000000       0.193834       0.112000       0.194100   -9999.000000       0.619000
54223     54223     neimenggu      120.6406       42.8339           69       203     2012      11        09        314              0.214208       0.993347       0.000000       0.208744       0.113000       0.039900       0.062100       0.568000
54223     54223     neimenggu      120.6406       42.8339           69       203     2012      11        10        315              0.215292       1.673370       0.000000       0.229141   -9999.000000       0.065100       0.062200       0.556000
54223     54223     neimenggu      120.6406       42.8339           69       203     2012      11        11        316              0.218000       1.404175       0.000000       0.232714   -9999.000000   -9999.000000       0.057500       0.489000
54223     54223     neimenggu      120.6406       42.8339           69       203     2012      11        12        317              0.218000      -0.604767       0.000000       0.170126   -9999.000000   -9999.000000       0.050900       0.563000
54223     54223     neimenggu      120.6406       42.8339           69       203     2012      11        13        318              0.000000      -3.098511       0.000000       0.112818   -9999.000000   -9999.000000       0.048900   -9999.000000
54223     54223     neimenggu      120.6406       42.8339           69       203     2012      11        14        319              0.217000      -4.377594       0.000000       0.102966   -9999.000000   -9999.000000       0.051000       0.527000
54223     54223     neimenggu      120.6406       42.8339           69       203     2012      11        15        320              0.217000      -4.548065       0.000000       0.105982   -9999.000000       0.045900       0.051600       0.527000
54223     54223     neimenggu      120.6406       42.8339           69       203     2012      11        16        321              0.217000      -3.268311       0.000000       0.108041   -9999.000000       0.084700       0.033100   -9999.000000
54223     54223     neimenggu      120.6406       42.8339           69       203     2012      11        17        322              0.000000      -4.528870       0.000000       0.107265   -9999.000000       0.020200       0.029600       0.438000
54223     54223     neimenggu      120.6406       42.8339           69       203     2012      11        18        323              0.215000      -5.475220       0.000000       0.097420   -9999.000000       0.049700       0.040400       0.468000
54223     54223     neimenggu      120.6406       42.8339           69       203     2012      11        19        324              0.214750      -3.656647       0.000000       0.105270   -9999.000000       0.164500       0.035000       0.472000
54223     54223     neimenggu      120.6406       42.8339           69       203     2012      11        20        325              0.212000      -4.313324       0.000000       0.103277   -9999.000000       0.037200       0.036100       0.534000
54223     54223     neimenggu      120.6406       42.8339           69       203     2012      11        21        326              0.212000      -3.934753       0.000000       0.101459   -9999.000000       0.108500       0.041500       0.463000
54223     54223     neimenggu      120.6406       42.8339           69       203     2012      11        22        327              0.211667      -4.010223       0.000000       0.107911   -9999.000000   -9999.000000       0.025900       0.402000
54223     54223     neimenggu      120.6406       42.8339           69       203     2012      11        23        328              0.209375      -5.754333       0.000000       0.098820   -9999.000000       0.136600       0.030000       0.376000
54223     54223     neimenggu      120.6406       42.8339           69       203     2012      11        24        329              0.207000      -5.794891       0.000000       0.095118   -9999.000000       0.014100   -9999.000000   -9999.000000
54223     54223     neimenggu      120.6406       42.8339           69       203     2012      11        25        330              0.206833      -3.989899       0.000000       0.101249   -9999.000000       0.056400       0.023100       0.442000
54223     54223     neimenggu      120.6406       42.8339           69       203     2012      11        26        331              0.203208      -4.783356       0.000000       0.102359   -9999.000000       0.175300       0.033300       0.450000
54223     54223     neimenggu      120.6406       42.8339           69       203     2012      11        27        332              0.201917      -7.726379       0.000000       0.094341   -9999.000000       0.042700       0.030300       0.417000
54223     54223     neimenggu      120.6406       42.8339           69       203     2012      11        28        333              0.195208      -4.024506       0.000000       0.101659   -9999.000000       0.030500       0.024900       0.430000
54223     54223     neimenggu      120.6406       42.8339           69       203     2012      11        29        334              0.180833      -7.289795       0.000000       0.095226   -9999.000000   -9999.000000       0.030800   -9999.000000
54223     54223     neimenggu      120.6406       42.8339           69       203     2012      11        30        335              0.158625     -10.075073       0.000000       0.091656   -9999.000000   -9999.000000       0.025400       0.325000
54223     54223     neimenggu      120.6406       42.8339           69       203     2012      12        01        336              0.150667     -12.879822       0.000000       0.087610   -9999.000000   -9999.000000       0.028200       0.347000
54223     54223     neimenggu      120.6406       42.8339           69       203     2012      12        02        337              0.153000      -9.341919       0.000000       0.087909   -9999.000000   -9999.000000       0.029900       0.349000
54223     54223     neimenggu      120.6406       42.8339           69       203     2012      12        03        338              0.146792      -5.432953       0.000000       0.091705   -9999.000000       0.018200       0.017800       0.382000
54223     54223     neimenggu      120.6406       42.8339           69       203     2012      12        04        339              0.141125      -9.340820       0.000000       0.088858   -9999.000000   -9999.000000       0.019400   -9999.000000
54223     54223     neimenggu      120.6406       42.8339           69       203     2012      12        05        340              0.137167     -10.378967       0.000000       0.087948   -9999.000000   -9999.000000       0.025000       0.332000
54223     54223     neimenggu      120.6406       42.8339           69       203     2012      12        06        341              0.134500     -12.868561       0.000000       0.087276   -9999.000000   -9999.000000       0.017600       0.334000
54223     54223     neimenggu      120.6406       42.8339           69       203     2012      12        07        342              0.132500     -14.000916       0.000000       0.086279   -9999.000000   -9999.000000       0.020200       0.264000
54223     54223     neimenggu      120.6406       42.8339           69       203     2012      12        08        343              0.131000     -14.780212       0.000000       0.085607   -9999.000000   -9999.000000       0.020700       0.348000
54223     54223     neimenggu      120.6406       42.8339           69       203     2012      12        09        344              0.131000     -14.478058       0.000000       0.085997   -9999.000000   -9999.000000       0.018900       0.280000
54223     54223     neimenggu      120.6406       42.8339           69       203     2012      12        10        345              0.131000     -11.803680       0.000000       0.086693   -9999.000000   -9999.000000       0.016300       0.239000
54223     54223     neimenggu      120.6406       42.8339           69       203     2012      12        11        346              0.131000     -12.474915       0.000000       0.086390   -9999.000000   -9999.000000   -9999.000000       0.356000
54223     54223     neimenggu      120.6406       42.8339           69       203     2012      12        12        347              0.131000     -11.889191       0.000000       0.086523   -9999.000000   -9999.000000       0.018300   -9999.000000
54223     54223     neimenggu      120.6406       42.8339           69       203     2012      12        13        348              0.131000     -10.050354       0.000000       0.087176   -9999.000000   -9999.000000       0.021200       0.254000
54223     54223     neimenggu      120.6406       42.8339           69       203     2012      12        14        349              0.131000     -10.107513       0.000000       0.087255   -9999.000000   -9999.000000       0.017100       0.331000
54223     54223     neimenggu      120.6406       42.8339           69       203     2012      12        15        350              0.000000     -11.086151       0.000000       0.086818   -9999.000000   -9999.000000       0.010000   -9999.000000
54223     54223     neimenggu      120.6406       42.8339           69       203     2012      12        16        351              0.130833     -11.378784       0.000000       0.086917   -9999.000000   -9999.000000       0.010000       0.312000
54223     54223     neimenggu      120.6406       42.8339           69       203     2012      12        17        352              0.130000     -12.304443       0.000000       0.086337   -9999.000000   -9999.000000       0.010000       0.289000
54223     54223     neimenggu      120.6406       42.8339           69       203     2012      12        18        353              0.129083     -13.029419       0.000000       0.086063   -9999.000000   -9999.000000   -9999.000000       0.229000
54223     54223     neimenggu      120.6406       42.8339           69       203     2012      12        19        354              0.128167     -14.223511       0.000000       0.085524   -9999.000000   -9999.000000       0.012100       0.290000
54223     54223     neimenggu      120.6406       42.8339           69       203     2012      12        20        355              0.000000     -13.461609       0.000000       0.085482   -9999.000000   -9999.000000       0.010000       0.262000
54223     54223     neimenggu      120.6406       42.8339           69       203     2012      12        21        356              0.129417     -10.907410       0.000000       0.085963   -9999.000000   -9999.000000       0.010000       0.267000
54223     54223     neimenggu      120.6406       42.8339           69       203     2012      12        22        357              0.128000     -12.519012       0.000000       0.086214   -9999.000000   -9999.000000       0.010000       0.306000
54223     54223     neimenggu      120.6406       42.8339           69       203     2012      12        23        358              0.128000     -16.176849       0.000000       0.084753   -9999.000000   -9999.000000   -9999.000000   -9999.000000
54223     54223     neimenggu      120.6406       42.8339           69       203     2012      12        24        359              0.128000     -17.805939       0.000000       0.082880   -9999.000000   -9999.000000       0.011600       0.287000
54223     54223     neimenggu      120.6406       42.8339           69       203     2012      12        25        360              0.128000     -15.793579       0.000000       0.083204   -9999.000000   -9999.000000       0.010000       0.257000
54223     54223     neimenggu      120.6406       42.8339           69       203     2012      12        26        361              0.000000     -17.988449       0.000000       0.082965   -9999.000000   -9999.000000       0.010000       0.280000
54223     54223     neimenggu      120.6406       42.8339           69       203     2012      12        27        362              0.128000     -15.099945       0.000000       0.083377   -9999.000000   -9999.000000       0.010000       0.299000
54223     54223     neimenggu      120.6406       42.8339           69       203     2012      12        28        363              0.128000     -13.239807       3.298483       0.083956   -9999.000000   -9999.000000       0.010000   -9999.000000
54223     54223     neimenggu      120.6406       42.8339           69       203     2012      12        29        364              0.000000     -13.413055       0.000000       0.084261   -9999.000000   -9999.000000   -9999.000000       0.278000
54223     54223     neimenggu      120.6406       42.8339           69       203     2012      12        30        365              0.000000     -10.923370       0.000000       0.084987   -9999.000000   -9999.000000       0.010000       0.240000
54223     54223     neimenggu      120.6406       42.8339           69       203     2012      12        31        366              0.128000      -9.731506       0.000000       0.085301   -9999.000000   -9999.000000       0.010000       0.210000
