# Supplementary material for: Research on Fusing Multisatellite Soil Moisture Data Based on Bayesian Model Averaging
Source: Hindawi journal article supplement (doi:10.1155/2018/9310838), 2018-06-25
Supplement: f1 [file 9310838.f1.zip › 2012_sm00-10cm_daily_ZDB_ZHY_54231_366days_allin.txt]

54231     54231     neimenggu      122.3500       42.9667           68       209     2012      01        01        001              0.000000   -9999.000000       0.000000   -9999.000000   -9999.000000   -9999.000000       0.057400   -9999.000000
54231     54231     neimenggu      122.3500       42.9667           68       209     2012      01        02        002              0.000000      -8.836334       0.000000       0.083075   -9999.000000   -9999.000000       0.036200       0.087000
54231     54231     neimenggu      122.3500       42.9667           68       209     2012      01        03        003              0.000000      -8.485504       0.000000       0.083163   -9999.000000   -9999.000000       0.033000       0.034000
54231     54231     neimenggu      122.3500       42.9667           68       209     2012      01        04        004              0.000000      -8.681213       0.000000       0.083236   -9999.000000   -9999.000000       0.034500   -9999.000000
54231     54231     neimenggu      122.3500       42.9667           68       209     2012      01        05        005              0.000000      -9.295349       0.000000       0.083297   -9999.000000   -9999.000000       0.040600       0.044000
54231     54231     neimenggu      122.3500       42.9667           68       209     2012      01        06        006              0.000000      -9.811188       0.000000       0.083346   -9999.000000   -9999.000000       0.038400       0.021000
54231     54231     neimenggu      122.3500       42.9667           68       209     2012      01        07        007              0.000000     -10.901337       0.000000       0.083386   -9999.000000   -9999.000000       0.041900       0.045000
54231     54231     neimenggu      122.3500       42.9667           68       209     2012      01        08        008              0.000000     -11.197662       0.000000       0.083418   -9999.000000   -9999.000000       0.031300       0.067000
54231     54231     neimenggu      122.3500       42.9667           68       209     2012      01        09        009              0.000000     -11.039185       0.000000       0.083446   -9999.000000   -9999.000000       0.032800   -9999.000000
54231     54231     neimenggu      122.3500       42.9667           68       209     2012      01        10        010              0.000000     -11.820251       0.000000       0.083445   -9999.000000   -9999.000000   -9999.000000       0.034000
54231     54231     neimenggu      122.3500       42.9667           68       209     2012      01        11        011              0.000000     -12.787598       0.000000       0.083374   -9999.000000   -9999.000000       0.041200       0.100000
54231     54231     neimenggu      122.3500       42.9667           68       209     2012      01        12        012              0.000000     -12.771606       0.000000       0.083253   -9999.000000   -9999.000000       0.042200   -9999.000000
54231     54231     neimenggu      122.3500       42.9667           68       209     2012      01        13        013              0.000000      -9.953644       0.000000       0.083766   -9999.000000   -9999.000000       0.049200       0.109000
54231     54231     neimenggu      122.3500       42.9667           68       209     2012      01        14        014              0.000000      -9.274719       0.000000       0.084039   -9999.000000   -9999.000000       0.034700       0.159000
54231     54231     neimenggu      122.3500       42.9667           68       209     2012      01        15        015              0.000000     -10.143036       0.000000       0.083654   -9999.000000   -9999.000000       0.038900       0.057000
54231     54231     neimenggu      122.3500       42.9667           68       209     2012      01        16        016              0.000000      -8.783173       0.000000       0.083635   -9999.000000   -9999.000000       0.047000       0.034000
54231     54231     neimenggu      122.3500       42.9667           68       209     2012      01        17        017              0.000000     -10.967285       0.000000       0.083154   -9999.000000   -9999.000000       0.048800       0.056000
54231     54231     neimenggu      122.3500       42.9667           68       209     2012      01        18        018              0.000000     -12.038971       0.000000       0.082627   -9999.000000   -9999.000000       0.049600       0.132000
54231     54231     neimenggu      122.3500       42.9667           68       209     2012      01        19        019              0.000000     -10.317474       0.000000       0.082710   -9999.000000   -9999.000000   -9999.000000       0.157000
54231     54231     neimenggu      122.3500       42.9667           68       209     2012      01        20        020              0.000000     -10.416748       0.000000       0.082909   -9999.000000   -9999.000000       0.044300   -9999.000000
54231     54231     neimenggu      122.3500       42.9667           68       209     2012      01        21        021              0.000000     -14.316956       0.000000       0.081545   -9999.000000   -9999.000000       0.046200       0.075000
54231     54231     neimenggu      122.3500       42.9667           68       209     2012      01        22        022              0.000000     -16.200348       0.000000       0.080776   -9999.000000   -9999.000000       0.051300       0.079000
54231     54231     neimenggu      122.3500       42.9667           68       209     2012      01        23        023              0.000000     -16.110504       0.000000       0.080486   -9999.000000   -9999.000000       0.055400       0.153000
54231     54231     neimenggu      122.3500       42.9667           68       209     2012      01        24        024              0.000000     -15.296448       0.000000       0.080556   -9999.000000   -9999.000000       0.060900       0.160000
54231     54231     neimenggu      122.3500       42.9667           68       209     2012      01        25        025              0.000000     -15.426941       0.000000       0.080557   -9999.000000   -9999.000000       0.047600   -9999.000000
54231     54231     neimenggu      122.3500       42.9667           68       209     2012      01        26        026              0.000000     -13.273010       0.000000       0.080748   -9999.000000   -9999.000000       0.049500       0.104000
54231     54231     neimenggu      122.3500       42.9667           68       209     2012      01        27        027              0.000000     -12.151520       0.000000       0.081033   -9999.000000   -9999.000000       0.049400       0.114000
54231     54231     neimenggu      122.3500       42.9667           68       209     2012      01        28        028              0.000000     -13.934357       0.000000       0.080562   -9999.000000   -9999.000000       0.054000       0.104000
54231     54231     neimenggu      122.3500       42.9667           68       209     2012      01        29        029              0.000000     -11.810059       0.000000       0.080677   -9999.000000   -9999.000000       0.051800       0.128000
54231     54231     neimenggu      122.3500       42.9667           68       209     2012      01        30        030              0.000000     -15.055054       0.000000       0.080117   -9999.000000   -9999.000000       0.062500       0.013000
54231     54231     neimenggu      122.3500       42.9667           68       209     2012      01        31        031              0.000000     -15.249725       0.000000       0.079683   -9999.000000   -9999.000000       0.042700       0.077000
54231     54231     neimenggu      122.3500       42.9667           68       209     2012      02        01        032              0.000000     -17.042633       0.000000       0.079645   -9999.000000   -9999.000000   -9999.000000       0.092000
54231     54231     neimenggu      122.3500       42.9667           68       209     2012      02        02        033              0.000000     -17.147430       0.000000       0.079640   -9999.000000   -9999.000000       0.057400       0.068000
54231     54231     neimenggu      122.3500       42.9667           68       209     2012      02        03        034              0.000000     -13.977264       0.000000       0.080220   -9999.000000   -9999.000000       0.059000       0.130000
54231     54231     neimenggu      122.3500       42.9667           68       209     2012      02        04        035              0.000000     -12.007385       0.000000       0.080627   -9999.000000   -9999.000000       0.063400       0.112000
54231     54231     neimenggu      122.3500       42.9667           68       209     2012      02        05        036              0.000000      -9.065491       0.000000       0.081370   -9999.000000   -9999.000000   -9999.000000       0.129000
54231     54231     neimenggu      122.3500       42.9667           68       209     2012      02        06        037              0.000000      -6.754913       0.000000       0.088112   -9999.000000   -9999.000000       0.052200       0.072000
54231     54231     neimenggu      122.3500       42.9667           68       209     2012      02        07        038              0.000000     -11.803589       0.000000       0.083023   -9999.000000   -9999.000000       0.056100   -9999.000000
54231     54231     neimenggu      122.3500       42.9667           68       209     2012      02        08        039              0.000000     -12.535614       0.000000       0.082094   -9999.000000   -9999.000000       0.069000       0.009000
54231     54231     neimenggu      122.3500       42.9667           68       209     2012      02        09        040              0.000000     -10.398621       0.000000       0.082406   -9999.000000   -9999.000000       0.062200       0.046000
54231     54231     neimenggu      122.3500       42.9667           68       209     2012      02        10        041              0.000000      -9.069031       0.000000       0.082415   -9999.000000   -9999.000000       0.065300   -9999.000000
54231     54231     neimenggu      122.3500       42.9667           68       209     2012      02        11        042              0.000000     -10.123688       0.000000       0.081994   -9999.000000   -9999.000000       0.051800       0.078000
54231     54231     neimenggu      122.3500       42.9667           68       209     2012      02        12        043              0.000000     -10.006592       0.000000       0.081707   -9999.000000   -9999.000000       0.056300       0.180000
54231     54231     neimenggu      122.3500       42.9667           68       209     2012      02        13        044              0.000000      -5.501648       0.000000       0.091246   -9999.000000   -9999.000000       0.056700       0.002000
54231     54231     neimenggu      122.3500       42.9667           68       209     2012      02        14        045              0.000000      -4.481140       0.693385       0.109403   -9999.000000   -9999.000000       0.055800       0.023000
54231     54231     neimenggu      122.3500       42.9667           68       209     2012      02        15        046              0.000000      -8.807678       0.000000       0.088727   -9999.000000   -9999.000000       0.064800       0.042000
54231     54231     neimenggu      122.3500       42.9667           68       209     2012      02        16        047              0.000000      -7.597168       0.000000       0.088190   -9999.000000   -9999.000000       0.070900       0.073000
54231     54231     neimenggu      122.3500       42.9667           68       209     2012      02        17        048              0.000000      -9.286530       0.000000       0.086057   -9999.000000   -9999.000000       0.050400       0.080000
54231     54231     neimenggu      122.3500       42.9667           68       209     2012      02        18        049              0.000000     -10.138336       1.506718       0.085670   -9999.000000   -9999.000000   -9999.000000   -9999.000000
54231     54231     neimenggu      122.3500       42.9667           68       209     2012      02        19        050              0.000000      -8.329865       0.000000       0.089455   -9999.000000   -9999.000000       0.057100       0.120000
54231     54231     neimenggu      122.3500       42.9667           68       209     2012      02        20        051              0.000000      -3.995422       0.000000       0.116839   -9999.000000   -9999.000000       0.057700       0.036000
54231     54231     neimenggu      122.3500       42.9667           68       209     2012      02        21        052              0.000000      -7.295074       0.000000       0.091799   -9999.000000   -9999.000000       0.071900       0.119000
54231     54231     neimenggu      122.3500       42.9667           68       209     2012      02        22        053              0.000000      -5.524170       0.689340       0.101866   -9999.000000   -9999.000000   -9999.000000       0.089000
54231     54231     neimenggu      122.3500       42.9667           68       209     2012      02        23        054              0.000000      -7.200562       0.000000       0.091870   -9999.000000   -9999.000000       0.044300   -9999.000000
54231     54231     neimenggu      122.3500       42.9667           68       209     2012      02        24        055              0.000000      -7.681976       0.000000       0.088150   -9999.000000   -9999.000000       0.045300       0.007000
54231     54231     neimenggu      122.3500       42.9667           68       209     2012      02        25        056              0.000000      -5.682587       0.000000       0.100421   -9999.000000   -9999.000000       0.048500       0.053000
54231     54231     neimenggu      122.3500       42.9667           68       209     2012      02        26        057              0.000000      -7.139709       0.000000       0.089912   -9999.000000   -9999.000000       0.050400       0.069000
54231     54231     neimenggu      122.3500       42.9667           68       209     2012      02        27        058              0.000000      -7.553497       0.000000       0.088405   -9999.000000   -9999.000000       0.057100       0.182000
54231     54231     neimenggu      122.3500       42.9667           68       209     2012      02        28        059              0.000000      -3.280609       0.000000       0.115052       0.149000   -9999.000000       0.068500       0.231000
54231     54231     neimenggu      122.3500       42.9667           68       209     2012      02        29        060              0.000000   -9999.000000       0.000000   -9999.000000   -9999.000000   -9999.000000   -9999.000000   -9999.000000
54231     54231     neimenggu      122.3500       42.9667           68       209     2012      03        01        061              0.000000       0.010864       0.000000       0.165590       0.145000   -9999.000000       0.061500       0.152000
54231     54231     neimenggu      122.3500       42.9667           68       209     2012      03        02        062              0.000000      -3.229706       0.000000       0.129839       0.108000   -9999.000000       0.058500       0.129000
54231     54231     neimenggu      122.3500       42.9667           68       209     2012      03        03        063              0.000000      -5.730682       0.000000       0.102694       0.118000   -9999.000000       0.061300       0.090000
54231     54231     neimenggu      122.3500       42.9667           68       209     2012      03        04        064              0.000000      -2.289062       0.000000       0.134177       0.115000   -9999.000000       0.057500       0.075000
54231     54231     neimenggu      122.3500       42.9667           68       209     2012      03        05        065              0.000000       0.418274       0.000000       0.165790   -9999.000000       0.042200       0.051900       0.341000
54231     54231     neimenggu      122.3500       42.9667           68       209     2012      03        06        066              0.000000       0.385742       0.284388       0.177877   -9999.000000   -9999.000000       0.043700       0.176000
54231     54231     neimenggu      122.3500       42.9667           68       209     2012      03        07        067              0.000000      -3.784790       0.000000       0.118133   -9999.000000   -9999.000000       0.040000   -9999.000000
54231     54231     neimenggu      122.3500       42.9667           68       209     2012      03        08        068              0.000000      -3.583099       0.000000       0.118512   -9999.000000   -9999.000000       0.041900       0.204000
54231     54231     neimenggu      122.3500       42.9667           68       209     2012      03        09        069              0.000000      -5.873505       0.000000       0.099937   -9999.000000       0.069600       0.042500       0.209000
54231     54231     neimenggu      122.3500       42.9667           68       209     2012      03        10        070              0.000000      -6.182678       0.000000       0.098013   -9999.000000   -9999.000000   -9999.000000   -9999.000000
54231     54231     neimenggu      122.3500       42.9667           68       209     2012      03        11        071              0.000000      -6.669464       0.000000       0.091686   -9999.000000   -9999.000000       0.035200       0.204000
54231     54231     neimenggu      122.3500       42.9667           68       209     2012      03        12        072              0.000000      -5.730988       0.000000       0.093131   -9999.000000   -9999.000000       0.049700       0.216000
54231     54231     neimenggu      122.3500       42.9667           68       209     2012      03        13        073              0.000000      -3.826965       0.000000       0.110771       0.116000   -9999.000000       0.055100       0.322000
54231     54231     neimenggu      122.3500       42.9667           68       209     2012      03        14        074              0.000000       0.151459       0.000000       0.166233       0.131000       0.052800       0.057000       0.465000
54231     54231     neimenggu      122.3500       42.9667           68       209     2012      03        15        075              0.000000       0.333862       0.000000       0.167240       0.176000   -9999.000000       0.118700       0.446000
54231     54231     neimenggu      122.3500       42.9667           68       209     2012      03        16        076              0.000000       2.435608       0.000000       0.223745   -9999.000000   -9999.000000       0.102900       0.534000
54231     54231     neimenggu      122.3500       42.9667           68       209     2012      03        17        077              0.000000       3.002136       0.901634       0.224746   -9999.000000       0.079200       0.067100       0.073000
54231     54231     neimenggu      122.3500       42.9667           68       209     2012      03        18        078              0.000000      -3.159637       5.108537       0.138157       0.159000   -9999.000000       0.070300   -9999.000000
54231     54231     neimenggu      122.3500       42.9667           68       209     2012      03        19        079              0.000000      -1.857452       0.000000       0.133712       0.139000   -9999.000000       0.061800       0.421000
54231     54231     neimenggu      122.3500       42.9667           68       209     2012      03        20        080              0.000000       0.911407       0.052169       0.178776       0.136000   -9999.000000       0.065300       0.171000
54231     54231     neimenggu      122.3500       42.9667           68       209     2012      03        21        081              0.000000       1.307281       0.000000       0.184805   -9999.000000   -9999.000000       0.068500       0.362000
54231     54231     neimenggu      122.3500       42.9667           68       209     2012      03        22        082              0.000000       2.634552       0.000000       0.210268       0.132000       0.207000       0.062700       0.274000
54231     54231     neimenggu      122.3500       42.9667           68       209     2012      03        23        083              0.000000       3.379639       2.221041       0.218658       0.124000       0.024500       0.072200   -9999.000000
54231     54231     neimenggu      122.3500       42.9667           68       209     2012      03        24        084              0.000000       1.802582       0.354803       0.211929       0.126000       0.038200       0.078000       0.133000
54231     54231     neimenggu      122.3500       42.9667           68       209     2012      03        25        085              0.000000       1.902039       0.318295       0.203710       0.117000   -9999.000000       0.060700       0.112000
54231     54231     neimenggu      122.3500       42.9667           68       209     2012      03        26        086              0.000000       2.365692       0.000000       0.208338       0.135000   -9999.000000       0.063800       0.223000
54231     54231     neimenggu      122.3500       42.9667           68       209     2012      03        27        087              0.000000       6.134125       0.000000       0.249901   -9999.000000   -9999.000000   -9999.000000       0.224000
54231     54231     neimenggu      122.3500       42.9667           68       209     2012      03        28        088              0.000000       7.788330       0.000000       0.248050       0.129000   -9999.000000       0.062500       0.214000
54231     54231     neimenggu      122.3500       42.9667           68       209     2012      03        29        089              0.000000       8.992096       0.000000       0.250176       0.112000       0.075200       0.070400       0.216000
54231     54231     neimenggu      122.3500       42.9667           68       209     2012      03        30        090              0.000000       8.170380       0.000000       0.242378       0.110000   -9999.000000       0.068900       0.211000
54231     54231     neimenggu      122.3500       42.9667           68       209     2012      03        31        091              0.000000       4.896515       0.201914       0.220520   -9999.000000       0.024000       0.070100       0.125000
54231     54231     neimenggu      122.3500       42.9667           68       209     2012      04        01        092              0.000000       2.362549       0.000000       0.194756   -9999.000000   -9999.000000       0.077900       0.171000
54231     54231     neimenggu      122.3500       42.9667           68       209     2012      04        02        093              0.000000       2.465149       0.092512       0.203853       0.121000   -9999.000000       0.066500       0.061000
54231     54231     neimenggu      122.3500       42.9667           68       209     2012      04        03        094              0.000000       4.173492       0.000000       0.211314       0.107000   -9999.000000       0.071100       0.185000
54231     54231     neimenggu      122.3500       42.9667           68       209     2012      04        04        095              0.000000       5.012695       0.000000       0.237088       0.111000       0.218300       0.067500       0.182000
54231     54231     neimenggu      122.3500       42.9667           68       209     2012      04        05        096              0.000000       6.025574       0.044086       0.238407       0.117000       0.003500       0.063100   -9999.000000
54231     54231     neimenggu      122.3500       42.9667           68       209     2012      04        06        097              0.000000       4.526855       0.000000       0.218985   -9999.000000       0.066800       0.078200       0.033000
54231     54231     neimenggu      122.3500       42.9667           68       209     2012      04        07        098              0.000000       3.487823       0.000000       0.212534       0.111000   -9999.000000       0.081600       0.063000
54231     54231     neimenggu      122.3500       42.9667           68       209     2012      04        08        099              0.000000       8.086761       0.196363       0.243302       0.106000       0.058200       0.071400   -9999.000000
54231     54231     neimenggu      122.3500       42.9667           68       209     2012      04        09        100              0.000000       7.813049       0.078225       0.238595       0.101000       0.294000       0.074100       0.219000
54231     54231     neimenggu      122.3500       42.9667           68       209     2012      04        10        101              0.000000      12.053711       0.632353       0.240452       0.098000       0.191600       0.082000       0.459000
54231     54231     neimenggu      122.3500       42.9667           68       209     2012      04        11        102              0.000000      10.699677       0.000000       0.243434       0.123000       0.078000       0.067000       0.022000
54231     54231     neimenggu      122.3500       42.9667           68       209     2012      04        12        103              0.000000       9.803192       1.291499       0.240884       0.118500       0.039000       0.083500       0.087000
54231     54231     neimenggu      122.3500       42.9667           68       209     2012      04        13        104              0.000000      10.681671       1.604150       0.238556       0.111000   -9999.000000   -9999.000000       0.089000
54231     54231     neimenggu      122.3500       42.9667           68       209     2012      04        14        105              0.000000      14.601868       2.245055       0.234727       0.120000   -9999.000000       0.064200       0.180000
54231     54231     neimenggu      122.3500       42.9667           68       209     2012      04        15        106              0.000000      14.270752       0.000000       0.234458       0.098000   -9999.000000       0.068100       0.192000
54231     54231     neimenggu      122.3500       42.9667           68       209     2012      04        16        107              0.000000      10.477295       1.665143       0.232358       0.116000       0.006300       0.071600   -9999.000000
54231     54231     neimenggu      122.3500       42.9667           68       209     2012      04        17        108              0.000000      11.105743       0.000000       0.230952       0.113000       0.008100   -9999.000000       0.082000
54231     54231     neimenggu      122.3500       42.9667           68       209     2012      04        18        109              0.000000      14.845490       0.000000       0.228678       0.112000       0.017400       0.072500       0.082000
54231     54231     neimenggu      122.3500       42.9667           68       209     2012      04        19        110              0.000000      16.564972       4.187055       0.226075       0.105000   -9999.000000       0.066100       0.119000
54231     54231     neimenggu      122.3500       42.9667           68       209     2012      04        20        111              0.000000      15.623993       0.000000       0.237080       0.126500   -9999.000000   -9999.000000       0.220000
54231     54231     neimenggu      122.3500       42.9667           68       209     2012      04        21        112              0.000000      14.399811       0.000000       0.253473       0.133000       0.033100       0.067000   -9999.000000
54231     54231     neimenggu      122.3500       42.9667           68       209     2012      04        22        113              0.000000      13.707306       0.000000       0.247519       0.135000       0.077900       0.076200       0.091000
54231     54231     neimenggu      122.3500       42.9667           68       209     2012      04        23        114              0.000000      16.018921       0.000000       0.243353       0.119500       0.082400       0.086800       0.097000
54231     54231     neimenggu      122.3500       42.9667           68       209     2012      04        24        115              0.000000      18.189636      49.580276       0.240668       0.205000       0.083000       0.185800       0.524000
54231     54231     neimenggu      122.3500       42.9667           68       209     2012      04        25        116              0.000000      13.783051       0.000000       0.319858   -9999.000000   -9999.000000       0.187800       0.561000
54231     54231     neimenggu      122.3500       42.9667           68       209     2012      04        26        117              0.000000       9.251648       0.043012       0.317375       0.183000       0.185600       0.111400       0.484000
54231     54231     neimenggu      122.3500       42.9667           68       209     2012      04        27        118              0.000000      13.095306       1.050521       0.295791   -9999.000000       0.208800       0.098500       0.344000
54231     54231     neimenggu      122.3500       42.9667           68       209     2012      04        28        119              0.000000      10.537262       0.000000       0.286624       0.127000       0.096400       0.092900       0.269000
54231     54231     neimenggu      122.3500       42.9667           68       209     2012      04        29        120              0.000000      11.042358       0.268008       0.278058       0.104000       0.093000       0.097900       0.265000
54231     54231     neimenggu      122.3500       42.9667           68       209     2012      04        30        121              0.000000      15.699249       0.245508       0.272693       0.102000       0.207200       0.080600       0.265000
54231     54231     neimenggu      122.3500       42.9667           68       209     2012      05        01        122              0.000000      17.941589       0.239127       0.268287       0.118000       0.127000       0.073400       0.157000
54231     54231     neimenggu      122.3500       42.9667           68       209     2012      05        02        123              0.000000      15.922791       0.063683       0.261889       0.140000   -9999.000000       0.077000       0.226000
54231     54231     neimenggu      122.3500       42.9667           68       209     2012      05        03        124              0.000000      14.871613       1.767376       0.262427       0.120000   -9999.000000       0.071600       0.222000
54231     54231     neimenggu      122.3500       42.9667           68       209     2012      05        04        125              0.000000      19.867828       0.000000       0.255474       0.109000       0.168600       0.077800   -9999.000000
54231     54231     neimenggu      122.3500       42.9667           68       209     2012      05        05        126              0.000000      17.595428       0.000000       0.250931       0.099000       0.284800       0.083100       0.169000
54231     54231     neimenggu      122.3500       42.9667           68       209     2012      05        06        127              0.000000      16.057800       0.000000       0.244907       0.107500       0.077400       0.064100       0.159000
54231     54231     neimenggu      122.3500       42.9667           68       209     2012      05        07        128              0.000000      16.727905       0.000000       0.240305   -9999.000000   -9999.000000       0.066400   -9999.000000
54231     54231     neimenggu      122.3500       42.9667           68       209     2012      05        08        129              0.000000      17.942871       0.000000       0.238333       0.114000   -9999.000000       0.062200       0.243000
54231     54231     neimenggu      122.3500       42.9667           68       209     2012      05        09        130              0.000000      18.480072       0.000000       0.235930       0.110500       0.042200       0.067500       0.241000
54231     54231     neimenggu      122.3500       42.9667           68       209     2012      05        10        131              0.000000      20.132660       0.000000       0.232022       0.093000       0.061400       0.072600       0.126000
54231     54231     neimenggu      122.3500       42.9667           68       209     2012      05        11        132              0.000000      19.802704       0.000000       0.227363       0.113500       0.124900   -9999.000000       0.166000
54231     54231     neimenggu      122.3500       42.9667           68       209     2012      05        12        133              0.000000      18.805237       5.515031       0.227655       0.185000       0.276200       0.142300       0.677000
54231     54231     neimenggu      122.3500       42.9667           68       209     2012      05        13        134              0.000000      14.431366       6.444967       0.264394       0.238000       0.247800       0.076100       0.492000
54231     54231     neimenggu      122.3500       42.9667           68       209     2012      05        14        135              0.000000      16.410156       0.240122       0.277372       0.157000       0.248300       0.106800       0.315000
54231     54231     neimenggu      122.3500       42.9667           68       209     2012      05        15        136              0.000000      15.135590       0.151512       0.267326       0.113000       0.158700       0.081000   -9999.000000
54231     54231     neimenggu      122.3500       42.9667           68       209     2012      05        16        137              0.000000      15.612549       1.504693       0.258004       0.150000       0.084700       0.145500       0.186000
54231     54231     neimenggu      122.3500       42.9667           68       209     2012      05        17        138              0.000000      14.192352       0.000000       0.263314       0.123000       0.122500       0.066500       0.273000
54231     54231     neimenggu      122.3500       42.9667           68       209     2012      05        18        139              0.000000      18.136932       0.000000       0.254317       0.124000       0.086500       0.062000       0.272000
54231     54231     neimenggu      122.3500       42.9667           68       209     2012      05        19        140              0.000000      21.408783       0.062506       0.245540       0.112000       0.082400       0.060400       0.350000
54231     54231     neimenggu      122.3500       42.9667           68       209     2012      05        20        141              0.000000      19.015717       0.000000       0.240229       0.092000   -9999.000000       0.069100   -9999.000000
54231     54231     neimenggu      122.3500       42.9667           68       209     2012      05        21        142              0.000000      22.306000       0.000000       0.236099       0.103000       0.069000       0.074600       0.270000
54231     54231     neimenggu      122.3500       42.9667           68       209     2012      05        22        143              0.000000      23.320160       0.105045       0.225656       0.137000       0.051800       0.094900       0.459000
54231     54231     neimenggu      122.3500       42.9667           68       209     2012      05        23        144              0.000000      19.917389       0.000000       0.226170   -9999.000000   -9999.000000       0.062900       0.353000
54231     54231     neimenggu      122.3500       42.9667           68       209     2012      05        24        145              0.000000      19.162231       0.000000       0.219464   -9999.000000       0.027000       0.064700       0.198000
54231     54231     neimenggu      122.3500       42.9667           68       209     2012      05        25        146              0.000000      18.164551       0.000000       0.215396       0.117000       0.069500       0.061000       0.118000
54231     54231     neimenggu      122.3500       42.9667           68       209     2012      05        26        147              0.000000      20.052826       0.041060       0.210948       0.090000   -9999.000000       0.072000       0.257000
54231     54231     neimenggu      122.3500       42.9667           68       209     2012      05        27        148              0.000000      18.872009       0.000000       0.211138       0.112500   -9999.000000       0.076200       0.197000
54231     54231     neimenggu      122.3500       42.9667           68       209     2012      05        28        149              0.000000      21.453094       0.000000       0.206716       0.118000   -9999.000000   -9999.000000       0.164000
54231     54231     neimenggu      122.3500       42.9667           68       209     2012      05        29        150              0.000000      25.148407       0.414660       0.199305       0.117000       0.069700       0.060300       0.277000
54231     54231     neimenggu      122.3500       42.9667           68       209     2012      05        30        151              0.000000      23.342407      10.025427       0.201994       0.236500       0.146100       0.150400   -9999.000000
54231     54231     neimenggu      122.3500       42.9667           68       209     2012      05        31        152              0.000000      16.575012       0.000000       0.271851       0.098000       0.079300       0.064100   -9999.000000
54231     54231     neimenggu      122.3500       42.9667           68       209     2012      06        01        153              0.000000      20.632416      15.542007       0.244150       0.116000       0.048600       0.154200       0.300000
54231     54231     neimenggu      122.3500       42.9667           68       209     2012      06        02        154              0.000000      20.218445       5.309422       0.262214       0.289000       0.312700       0.145100   -9999.000000
54231     54231     neimenggu      122.3500       42.9667           68       209     2012      06        03        155              0.000000      17.514130       1.800012       0.301277       0.261000       0.258800       0.107000       0.685000
54231     54231     neimenggu      122.3500       42.9667           68       209     2012      06        04        156              0.000000      19.079742       0.500406       0.285743       0.211500       0.100200       0.098400       0.521000
54231     54231     neimenggu      122.3500       42.9667           68       209     2012      06        05        157              0.000000      19.778687       0.000000       0.276960       0.135000       0.050700       0.079400   -9999.000000
54231     54231     neimenggu      122.3500       42.9667           68       209     2012      06        06        158              0.000000      22.652924       0.000000       0.262932       0.121000       0.137100       0.079900       0.343000
54231     54231     neimenggu      122.3500       42.9667           68       209     2012      06        07        159              0.000000      24.211823       0.774982       0.253638       0.125500   -9999.000000       0.074100       0.411000
54231     54231     neimenggu      122.3500       42.9667           68       209     2012      06        08        160              0.000000      25.145935       7.582428       0.249080       0.203000       0.065700       0.103300       0.898000
54231     54231     neimenggu      122.3500       42.9667           68       209     2012      06        09        161              0.000000      24.956360       4.032273       0.272983       0.162000       0.223500       0.055900       0.647000
54231     54231     neimenggu      122.3500       42.9667           68       209     2012      06        10        162              0.000000      23.201813       1.519498       0.276803       0.140000       0.178800       0.077400       0.534000
54231     54231     neimenggu      122.3500       42.9667           68       209     2012      06        11        163              0.000000      20.700012      18.476257       0.263515   -9999.000000       0.136500       0.104400       0.519000
54231     54231     neimenggu      122.3500       42.9667           68       209     2012      06        12        164              0.000000      19.347534       0.180874       0.307371       0.201000   -9999.000000       0.103800       0.516000
54231     54231     neimenggu      122.3500       42.9667           68       209     2012      06        13        165              0.000000      20.016235      10.120689       0.293000       0.204000   -9999.000000       0.154600   -9999.000000
54231     54231     neimenggu      122.3500       42.9667           68       209     2012      06        14        166              0.000000      20.798218       9.449875       0.293739       0.318000       0.172800   -9999.000000       0.893000
54231     54231     neimenggu      122.3500       42.9667           68       209     2012      06        15        167              0.000000      18.858368       6.343586       0.315785       0.264500       0.226800       0.129800       0.891000
54231     54231     neimenggu      122.3500       42.9667           68       209     2012      06        16        168              0.000000      20.735687       5.499574       0.304641       0.219000       0.245300       0.113400       0.862000
54231     54231     neimenggu      122.3500       42.9667           68       209     2012      06        17        169              0.000000      21.641357      14.180767       0.303682       0.224000       0.241200       0.097700       0.658000
54231     54231     neimenggu      122.3500       42.9667           68       209     2012      06        18        170              0.000000      23.398071       0.000000       0.320634       0.211000   -9999.000000       0.074000   -9999.000000
54231     54231     neimenggu      122.3500       42.9667           68       209     2012      06        19        171              0.000000      24.013092       0.000000       0.296022       0.169000       0.076300       0.069800       0.597000
54231     54231     neimenggu      122.3500       42.9667           68       209     2012      06        20        172              0.000000      25.245392       0.000000       0.281614       0.145000       0.389700       0.052900       0.501000
54231     54231     neimenggu      122.3500       42.9667           68       209     2012      06        21        173              0.000000      26.446594       1.102434       0.271149       0.117000   -9999.000000       0.059700       0.450000
54231     54231     neimenggu      122.3500       42.9667           68       209     2012      06        22        174              0.000000      25.904846       0.957286       0.268044       0.138000       0.037500       0.052400       0.555000
54231     54231     neimenggu      122.3500       42.9667           68       209     2012      06        23        175              0.000000      25.548645       0.193693       0.265104       0.176000       0.160700       0.064000       0.680000
54231     54231     neimenggu      122.3500       42.9667           68       209     2012      06        24        176              0.000000      24.931335       0.000000       0.260451       0.169000       0.121600       0.063500       0.616000
54231     54231     neimenggu      122.3500       42.9667           68       209     2012      06        25        177              0.000000      25.915070       0.043442       0.252011       0.141500       0.117800       0.076500       0.518000
54231     54231     neimenggu      122.3500       42.9667           68       209     2012      06        26        178              0.000000      26.218811       0.000000       0.245375       0.115000       0.164800       0.055800       0.388000
54231     54231     neimenggu      122.3500       42.9667           68       209     2012      06        27        179              0.000000      26.962585       0.000000       0.238240       0.115000       0.043400       0.057400       0.445000
54231     54231     neimenggu      122.3500       42.9667           68       209     2012      06        28        180              0.000000      27.591675       0.093333       0.229517       0.125500   -9999.000000       0.055800       0.382000
54231     54231     neimenggu      122.3500       42.9667           68       209     2012      06        29        181              0.000000      26.061188      14.385822       0.223692       0.217000       0.034100       0.085000       0.846000
54231     54231     neimenggu      122.3500       42.9667           68       209     2012      06        30        182              0.000000      22.318451       0.000000       0.295038       0.147000   -9999.000000       0.068800   -9999.000000
54231     54231     neimenggu      122.3500       42.9667           68       209     2012      07        01        183              0.000000      27.215790      13.569812       0.262764       0.190000   -9999.000000   -9999.000000   -9999.000000
54231     54231     neimenggu      122.3500       42.9667           68       209     2012      07        02        184              0.000000      23.907654       1.510005       0.295447       0.173000       0.232100       0.043900       0.746000
54231     54231     neimenggu      122.3500       42.9667           68       209     2012      07        03        185              0.000000      24.073059       2.442466       0.280111       0.197500   -9999.000000       0.059300       0.774000
54231     54231     neimenggu      122.3500       42.9667           68       209     2012      07        04        186              0.000000      22.809143       0.285793       0.280772       0.195000       0.254100       0.050400   -9999.000000
54231     54231     neimenggu      122.3500       42.9667           68       209     2012      07        05        187              0.000000      25.470123       0.666330       0.268661   -9999.000000       0.136300       0.042300       0.595000
54231     54231     neimenggu      122.3500       42.9667           68       209     2012      07        06        188              0.000000      27.205078       1.272559       0.257310   -9999.000000       0.076000       0.052900       0.672000
54231     54231     neimenggu      122.3500       42.9667           68       209     2012      07        07        189              0.000000      27.824371       0.126107       0.256562   -9999.000000       0.018100       0.040300       0.419000
54231     54231     neimenggu      122.3500       42.9667           68       209     2012      07        08        190              0.000000      28.749451       0.787505       0.244893       0.147500       0.131900       0.038700       0.591000
54231     54231     neimenggu      122.3500       42.9667           68       209     2012      07        09        191              0.000000      28.442719       0.270702       0.237098       0.160500       0.047500       0.063400       0.435000
54231     54231     neimenggu      122.3500       42.9667           68       209     2012      07        10        192              0.000000      26.696899      10.589391       0.236181       0.289000       0.098700       0.111000       1.000000
54231     54231     neimenggu      122.3500       42.9667           68       209     2012      07        11        193              0.000000      22.010437       3.666940       0.277435       0.298500   -9999.000000       0.116100       0.994000
54231     54231     neimenggu      122.3500       42.9667           68       209     2012      07        12        194              0.000000      20.898529       0.255884       0.286339       0.276000       0.174900       0.109100   -9999.000000
54231     54231     neimenggu      122.3500       42.9667           68       209     2012      07        13        195              0.000000      22.225281       0.000000       0.277157       0.188000       0.380300       0.076600       0.861000
54231     54231     neimenggu      122.3500       42.9667           68       209     2012      07        14        196              0.000000      24.138336       0.000000       0.263019       0.171500       0.151500       0.061300       0.619000
54231     54231     neimenggu      122.3500       42.9667           68       209     2012      07        15        197              0.000000      25.539764       0.000000       0.251287   -9999.000000       0.032300       0.074900       0.569000
54231     54231     neimenggu      122.3500       42.9667           68       209     2012      07        16        198              0.000000      26.748474       0.000000       0.241749       0.161500       0.050100       0.062900       0.556000
54231     54231     neimenggu      122.3500       42.9667           68       209     2012      07        17        199              0.000000      28.225098       0.000000       0.232826       0.166500   -9999.000000       0.073800   -9999.000000
54231     54231     neimenggu      122.3500       42.9667           68       209     2012      07        18        200              0.000000      28.376007       0.000000       0.225163       0.149000   -9999.000000       0.058800       0.630000
54231     54231     neimenggu      122.3500       42.9667           68       209     2012      07        19        201              0.000000      27.009094       0.000000       0.223807       0.161000   -9999.000000       0.059500       0.581000
54231     54231     neimenggu      122.3500       42.9667           68       209     2012      07        20        202              0.015313      28.497314       2.565926       0.218245       0.205000   -9999.000000       0.054200       0.364000
54231     54231     neimenggu      122.3500       42.9667           68       209     2012      07        21        203              0.014667      29.391693       3.929791       0.227131       0.221000   -9999.000000       0.076800       0.634000
54231     54231     neimenggu      122.3500       42.9667           68       209     2012      07        22        204              0.112667      27.512146      13.037689       0.243796       0.340000       0.139500       0.104600       1.000000
54231     54231     neimenggu      122.3500       42.9667           68       209     2012      07        23        205              0.093500      23.081726       0.267954       0.296414       0.236000   -9999.000000       0.103300       0.796000
54231     54231     neimenggu      122.3500       42.9667           68       209     2012      07        24        206              0.069833      26.382324       0.236165       0.265159       0.213000   -9999.000000       0.078800       0.660000
54231     54231     neimenggu      122.3500       42.9667           68       209     2012      07        25        207              0.056542      25.913574       1.277439       0.256465       0.227500       0.098600       0.074500       0.523000
54231     54231     neimenggu      122.3500       42.9667           68       209     2012      07        26        208              0.062958      28.747711      19.333218       0.249441       0.277000       0.485500       0.053200       1.000000
54231     54231     neimenggu      122.3500       42.9667           68       209     2012      07        27        209              0.046292      27.179901       0.000000       0.305240       0.245500       0.194400       0.084800       0.920000
54231     54231     neimenggu      122.3500       42.9667           68       209     2012      07        28        210              0.036708      27.420380       0.258867       0.280383       0.222000       0.110200       0.099300       0.647000
54231     54231     neimenggu      122.3500       42.9667           68       209     2012      07        29        211              0.028000      26.505035       0.480471       0.272664       0.217000       0.182000   -9999.000000       0.588000
54231     54231     neimenggu      122.3500       42.9667           68       209     2012      07        30        212              0.021583      24.879120       0.000000       0.261450       0.197500       0.086900       0.061700   -9999.000000
54231     54231     neimenggu      122.3500       42.9667           68       209     2012      07        31        213              0.017708      24.751526       0.217972       0.252370       0.241000       0.316100       0.063700       0.490000
54231     54231     neimenggu      122.3500       42.9667           68       209     2012      08        01        214              0.045833      23.998566      23.814951       0.248416   -9999.000000       0.298300       0.087700       0.528000
54231     54231     neimenggu      122.3500       42.9667           68       209     2012      08        02        215              0.122458      24.808258      11.126644       0.279830       0.324000       0.132600       0.091000   -9999.000000
54231     54231     neimenggu      122.3500       42.9667           68       209     2012      08        03        216              0.102875      22.778931       0.063345       0.320488       0.224000       0.133500       0.093900       0.763000
54231     54231     neimenggu      122.3500       42.9667           68       209     2012      08        04        217              0.111250      24.516205      20.841988       0.293745       0.283000       0.097700       0.083200       0.764000
54231     54231     neimenggu      122.3500       42.9667           68       209     2012      08        05        218              0.091583      24.563232       0.000000       0.329395       0.276000       0.155300       0.065600       0.562000
54231     54231     neimenggu      122.3500       42.9667           68       209     2012      08        06        219              0.068125      26.916901       0.237612       0.294293       0.245000   -9999.000000       0.070000       0.662000
54231     54231     neimenggu      122.3500       42.9667           68       209     2012      08        07        220              0.050458      27.270142       0.000000       0.281003       0.212000       0.093500   -9999.000000       0.587000
54231     54231     neimenggu      122.3500       42.9667           68       209     2012      08        08        221              0.133125      28.448730      11.710470       0.270607       0.223000   -9999.000000       0.095300       0.846000
54231     54231     neimenggu      122.3500       42.9667           68       209     2012      08        09        222              0.118167      25.841949       1.632652       0.302883       0.178000       0.145300       0.086700       0.650000
54231     54231     neimenggu      122.3500       42.9667           68       209     2012      08        10        223              0.122083      26.639191       9.690028       0.280772       0.241000   -9999.000000       0.082800   -9999.000000
54231     54231     neimenggu      122.3500       42.9667           68       209     2012      08        11        224              0.113083      25.784912       8.755500       0.297275   -9999.000000       0.213800       0.079000       0.850000
54231     54231     neimenggu      122.3500       42.9667           68       209     2012      08        12        225              0.125083      21.979980       0.359099       0.294457       0.296000       0.164000       0.082900       0.781000
54231     54231     neimenggu      122.3500       42.9667           68       209     2012      08        13        226              0.095917      21.846985       0.328240       0.296462       0.255500       0.330300       0.093100       0.731000
54231     54231     neimenggu      122.3500       42.9667           68       209     2012      08        14        227              0.080333      23.293579       0.126419       0.278217       0.210000       0.099600       0.105200       0.649000
54231     54231     neimenggu      122.3500       42.9667           68       209     2012      08        15        228              0.064667      23.507477       0.000000       0.271357       0.231000       0.053400   -9999.000000   -9999.000000
54231     54231     neimenggu      122.3500       42.9667           68       209     2012      08        16        229              0.049333      24.487427       0.000000       0.263134       0.281000       0.109200       0.083800       0.540000
54231     54231     neimenggu      122.3500       42.9667           68       209     2012      08        17        230              0.039750      25.460968       0.080629       0.254618       0.247000       0.088600       0.088700       0.553000
54231     54231     neimenggu      122.3500       42.9667           68       209     2012      08        18        231              0.053917      24.879700      33.739082       0.251833       0.271000       0.147400       0.106200       0.535000
54231     54231     neimenggu      122.3500       42.9667           68       209     2012      08        19        232              0.065833      25.605042       0.000000       0.309436       0.239000       0.139400       0.103700       0.575000
54231     54231     neimenggu      122.3500       42.9667           68       209     2012      08        20        233              0.048417      24.063477       2.119897       0.300803       0.221000       0.041800       0.104100       0.407000
54231     54231     neimenggu      122.3500       42.9667           68       209     2012      08        21        234              0.075917      22.884857       0.000000       0.287154       0.237000       0.109600       0.075100       0.598000
54231     54231     neimenggu      122.3500       42.9667           68       209     2012      08        22        235              0.086083      19.775543       0.000000       0.280673       0.267000       0.052600       0.074100   -9999.000000
54231     54231     neimenggu      122.3500       42.9667           68       209     2012      08        23        236              0.080042      19.432281       0.000000       0.270569       0.250500   -9999.000000       0.081600       0.484000
54231     54231     neimenggu      122.3500       42.9667           68       209     2012      08        24        237              0.076000      22.193787       0.000000       0.263640       0.229000   -9999.000000       0.085000   -9999.000000
54231     54231     neimenggu      122.3500       42.9667           68       209     2012      08        25        238              0.000000      23.287720       0.000000       0.257801       0.234000   -9999.000000       0.079100   -9999.000000
54231     54231     neimenggu      122.3500       42.9667           68       209     2012      08        26        239              0.070542      23.904877       0.000000       0.251413       0.229000       0.149100       0.095200       0.519000
54231     54231     neimenggu      122.3500       42.9667           68       209     2012      08        27        240              0.070000      24.356689       1.080135       0.250459       0.279000   -9999.000000       0.069000       0.416000
54231     54231     neimenggu      122.3500       42.9667           68       209     2012      08        28        241              0.070000      23.644470       2.863895       0.256207       0.284000       0.218600       0.067400   -9999.000000
54231     54231     neimenggu      122.3500       42.9667           68       209     2012      08        29        242              0.070708      25.097534       0.504829       0.259690       0.270000       0.125000       0.072800       0.518000
54231     54231     neimenggu      122.3500       42.9667           68       209     2012      08        30        243              0.070375      23.363190       0.000000       0.254236       0.206000       0.063300       0.074000       0.413000
54231     54231     neimenggu      122.3500       42.9667           68       209     2012      08        31        244              0.069333      26.395172       0.000000       0.245125       0.236000       0.179800       0.079100   -9999.000000
54231     54231     neimenggu      122.3500       42.9667           68       209     2012      09        01        245              0.068348      28.381348       0.000000       0.238979       0.250000       0.076000   -9999.000000       0.505000
54231     54231     neimenggu      122.3500       42.9667           68       209     2012      09        02        246              0.085208      28.100647       8.669885       0.232256       0.332000       0.139200       0.072300       0.979000
54231     54231     neimenggu      122.3500       42.9667           68       209     2012      09        03        247              0.152042      21.611206      14.328938       0.265635       0.312500       0.149000       0.099600       1.000000
54231     54231     neimenggu      122.3500       42.9667           68       209     2012      09        04        248              0.137417      16.763458       0.449560       0.307993       0.240000       0.207100       0.094200       0.781000
54231     54231     neimenggu      122.3500       42.9667           68       209     2012      09        05        249              0.122042      17.473450       0.196838       0.285962       0.209000       0.112500       0.087600       0.515000
54231     54231     neimenggu      122.3500       42.9667           68       209     2012      09        06        250              0.113125      20.212433       0.000000       0.272737       0.220500       0.114700       0.083400       0.498000
54231     54231     neimenggu      122.3500       42.9667           68       209     2012      09        07        251              0.106708      22.837402       0.106100       0.264285       0.243000       0.007800       0.070200       0.526000
54231     54231     neimenggu      122.3500       42.9667           68       209     2012      09        08        252              0.160917      22.841003       2.688877       0.260146       0.265000       0.041900       0.069700   -9999.000000
54231     54231     neimenggu      122.3500       42.9667           68       209     2012      09        09        253              0.171875      21.698425       0.000000       0.266701       0.247500       0.177500       0.080100       0.669000
54231     54231     neimenggu      122.3500       42.9667           68       209     2012      09        10        254              0.150208      22.977386       0.000000       0.259996       0.201000       0.228600       0.071400       0.518000
54231     54231     neimenggu      122.3500       42.9667           68       209     2012      09        11        255              0.154292      23.894012      32.847328       0.254989       0.169000   -9999.000000       0.106500       0.405000
54231     54231     neimenggu      122.3500       42.9667           68       209     2012      09        12        256              0.193667      22.785370       4.350309       0.287052       0.318500       0.444400       0.104300       0.706000
54231     54231     neimenggu      122.3500       42.9667           68       209     2012      09        13        257              0.155917      15.526886       0.314105       0.318877       0.247000       0.152900       0.079100   -9999.000000
54231     54231     neimenggu      122.3500       42.9667           68       209     2012      09        14        258              0.138667      16.436737       0.000000       0.295049       0.212500       0.144700       0.074300       0.572000
54231     54231     neimenggu      122.3500       42.9667           68       209     2012      09        15        259              0.126292      17.327057       0.000000       0.284399   -9999.000000   -9999.000000       0.082900       0.461000
54231     54231     neimenggu      122.3500       42.9667           68       209     2012      09        16        260              0.117042      18.154053       0.000000       0.276969       0.185000   -9999.000000       0.067300       0.463000
54231     54231     neimenggu      122.3500       42.9667           68       209     2012      09        17        261              0.110167      18.314941       0.000000       0.271219       0.186000       0.052400       0.070100       0.394000
54231     54231     neimenggu      122.3500       42.9667           68       209     2012      09        18        262              0.103875      18.378601       0.000000       0.266119       0.209000       0.108500       0.054400       0.389000
54231     54231     neimenggu      122.3500       42.9667           68       209     2012      09        19        263              0.098542      18.688782       0.000000       0.262061       0.201500       0.053700       0.057500       0.483000
54231     54231     neimenggu      122.3500       42.9667           68       209     2012      09        20        264              0.093208      19.528137       0.000000       0.258582       0.187000       0.122400       0.057000       0.426000
54231     54231     neimenggu      122.3500       42.9667           68       209     2012      09        21        265              0.087958      21.468079       0.000000       0.255241   -9999.000000   -9999.000000       0.064900       0.417000
54231     54231     neimenggu      122.3500       42.9667           68       209     2012      09        22        266              0.084458      21.960907       0.327963       0.251084       0.153500       0.088600       0.062500       0.405000
54231     54231     neimenggu      122.3500       42.9667           68       209     2012      09        23        267              0.081417      21.614655       1.543375       0.249667       0.165000       0.116700       0.068600       0.466000
54231     54231     neimenggu      122.3500       42.9667           68       209     2012      09        24        268              0.078667      20.030212       0.000000       0.248115       0.162000       0.069300       0.051800       0.491000
54231     54231     neimenggu      122.3500       42.9667           68       209     2012      09        25        269              0.076000      18.745972       4.398492       0.245316       0.158500       0.044500       0.051700       0.653000
54231     54231     neimenggu      122.3500       42.9667           68       209     2012      09        26        270              0.074875      18.347168       0.000000       0.263253       0.140000       0.192500       0.052000   -9999.000000
54231     54231     neimenggu      122.3500       42.9667           68       209     2012      09        27        271              0.108143      18.232208      47.928444       0.258365       0.178000   -9999.000000       0.103200       1.000000
54231     54231     neimenggu      122.3500       42.9667           68       209     2012      09        28        272              0.196867      16.440765      10.545834       0.317486       0.274000   -9999.000000       0.121800       0.953000
54231     54231     neimenggu      122.3500       42.9667           68       209     2012      09        29        273              0.175292      13.059967       0.000000       0.331242   -9999.000000   -9999.000000   -9999.000000   -9999.000000
54231     54231     neimenggu      122.3500       42.9667           68       209     2012      09        30        274              0.149208      11.983368       0.000000       0.310663       0.210500   -9999.000000       0.074700       0.534000
54231     54231     neimenggu      122.3500       42.9667           68       209     2012      10        01        275              0.136875      12.947784       0.147832       0.296672       0.151000   -9999.000000       0.067100       0.513000
54231     54231     neimenggu      122.3500       42.9667           68       209     2012      10        02        276              0.127625      15.360504       0.000000       0.288975       0.144000       0.126700       0.060600       0.512000
54231     54231     neimenggu      122.3500       42.9667           68       209     2012      10        03        277              0.122333      17.130798       0.195414       0.283141       0.151000   -9999.000000       0.063800       0.558000
54231     54231     neimenggu      122.3500       42.9667           68       209     2012      10        04        278              0.116167      14.918671       0.000000       0.278722       0.154000   -9999.000000       0.071500       0.469000
54231     54231     neimenggu      122.3500       42.9667           68       209     2012      10        05        279              0.110208      15.089020       0.000000       0.273733       0.146000       0.115100       0.054200       0.424000
54231     54231     neimenggu      122.3500       42.9667           68       209     2012      10        06        280              0.105417      13.236847       0.000000       0.269532       0.150000       0.174800       0.055000       0.454000
54231     54231     neimenggu      122.3500       42.9667           68       209     2012      10        07        281              0.102167      13.834900       0.000000       0.266901       0.140000       0.069600       0.063600   -9999.000000
54231     54231     neimenggu      122.3500       42.9667           68       209     2012      10        08        282              0.099000      15.882111       0.000000       0.264740       0.143000       0.091400       0.063500       0.534000
54231     54231     neimenggu      122.3500       42.9667           68       209     2012      10        09        283              0.186375      17.776184      34.149345       0.262615   -9999.000000       0.205600       0.106400       0.947000
54231     54231     neimenggu      122.3500       42.9667           68       209     2012      10        10        284              0.166583      12.553040       0.000000       0.328387   -9999.000000       0.214200       0.093500       0.941000
54231     54231     neimenggu      122.3500       42.9667           68       209     2012      10        11        285              0.149625      10.976471       0.671153       0.301466       0.164000       0.186100       0.076500       0.708000
54231     54231     neimenggu      122.3500       42.9667           68       209     2012      10        12        286              0.141208      12.773376       8.013768       0.293132       0.156000       0.136700       0.072600   -9999.000000
54231     54231     neimenggu      122.3500       42.9667           68       209     2012      10        13        287              0.129333      14.355865       1.018010       0.286971       0.127000       0.105700       0.070400       0.571000
54231     54231     neimenggu      122.3500       42.9667           68       209     2012      10        14        288              0.122542       9.530060       0.000000       0.279638       0.121000       0.095200       0.062600       0.511000
54231     54231     neimenggu      122.3500       42.9667           68       209     2012      10        15        289              0.119583       8.798889       0.363844       0.276508       0.150000       0.095400       0.085300       0.562000
54231     54231     neimenggu      122.3500       42.9667           68       209     2012      10        16        290              0.187625      10.913361       5.224567       0.274918   -9999.000000   -9999.000000   -9999.000000       0.947000
54231     54231     neimenggu      122.3500       42.9667           68       209     2012      10        17        291              0.170667       8.558136       0.000000       0.290684       0.195000       0.225800       0.088400       0.842000
54231     54231     neimenggu      122.3500       42.9667           68       209     2012      10        18        292              0.155042       6.816040       0.000000       0.280764       0.163000       0.248200       0.076000       0.654000
54231     54231     neimenggu      122.3500       42.9667           68       209     2012      10        19        293              0.146958       6.183624       0.000000       0.275900       0.146500   -9999.000000       0.079800       0.594000
54231     54231     neimenggu      122.3500       42.9667           68       209     2012      10        20        294              0.140125       9.620270       0.000000       0.273881   -9999.000000   -9999.000000       0.064300       0.565000
54231     54231     neimenggu      122.3500       42.9667           68       209     2012      10        21        295              0.146750       5.681305      12.003734       0.269035   -9999.000000   -9999.000000       0.057700       0.725000
54231     54231     neimenggu      122.3500       42.9667           68       209     2012      10        22        296              0.163000       3.868683      17.736383       0.288502   -9999.000000   -9999.000000       0.040100       0.678000
54231     54231     neimenggu      122.3500       42.9667           68       209     2012      10        23        297              0.183375       3.985992       2.138651       0.313630   -9999.000000       0.030000       0.080300       0.647000
54231     54231     neimenggu      122.3500       42.9667           68       209     2012      10        24        298              0.178250       3.999573       0.000000       0.327173   -9999.000000   -9999.000000       0.094000       0.776000
54231     54231     neimenggu      122.3500       42.9667           68       209     2012      10        25        299              0.000000       8.304840       0.000000       0.302987       0.155000   -9999.000000       0.071500   -9999.000000
54231     54231     neimenggu      122.3500       42.9667           68       209     2012      10        26        300              0.155500       9.593201       0.062426       0.293938       0.149000       0.085700       0.070600       0.659000
54231     54231     neimenggu      122.3500       42.9667           68       209     2012      10        27        301              0.152833      12.545410       0.825899       0.289339       0.147000       0.193400       0.074400       0.737000
54231     54231     neimenggu      122.3500       42.9667           68       209     2012      10        28        302              0.000000       9.487122       0.000000       0.286924       0.126000       0.083200       0.065900   -9999.000000
54231     54231     neimenggu      122.3500       42.9667           68       209     2012      10        29        303              0.142708       4.336884       0.683173       0.277019   -9999.000000       0.196400       0.061200       0.437000
54231     54231     neimenggu      122.3500       42.9667           68       209     2012      10        30        304              0.140750       2.244629       0.062351       0.248574       0.123000       0.097100       0.065000       0.577000
54231     54231     neimenggu      122.3500       42.9667           68       209     2012      10        31        305              0.134875       1.826782       0.277492       0.246634   -9999.000000       0.099500       0.048300       0.314000
54231     54231     neimenggu      122.3500       42.9667           68       209     2012      11        01        306              0.132542       1.064880       0.000000       0.213419   -9999.000000       0.113200       0.056400       0.501000
54231     54231     neimenggu      122.3500       42.9667           68       209     2012      11        02        307              0.133625       0.900970       0.608203       0.214371       0.134000       0.077900   -9999.000000       0.429000
54231     54231     neimenggu      122.3500       42.9667           68       209     2012      11        03        308              0.135000       0.815216       0.000000       0.227659       0.119000   -9999.000000       0.055200       0.537000
54231     54231     neimenggu      122.3500       42.9667           68       209     2012      11        04        309              0.141500       2.843781       2.162066       0.270917       0.112000   -9999.000000       0.060200       0.671000
54231     54231     neimenggu      122.3500       42.9667           68       209     2012      11        05        310              0.144042       3.447662       0.000000       0.272176   -9999.000000   -9999.000000       0.048900   -9999.000000
54231     54231     neimenggu      122.3500       42.9667           68       209     2012      11        06        311              0.137083       1.572235       0.000000       0.244860   -9999.000000   -9999.000000       0.048100       0.491000
54231     54231     neimenggu      122.3500       42.9667           68       209     2012      11        07        312              0.135958       1.468842       0.000000       0.221379       0.125000       0.035500       0.053700       0.454000
54231     54231     neimenggu      122.3500       42.9667           68       209     2012      11        08        313              0.132375       1.969574       0.126858       0.243454       0.123000       0.114500   -9999.000000       0.652000
54231     54231     neimenggu      122.3500       42.9667           68       209     2012      11        09        314              0.130958       2.464935       0.000000       0.231206       0.127000   -9999.000000       0.052800       0.441000
54231     54231     neimenggu      122.3500       42.9667           68       209     2012      11        10        315              0.146667       2.399261       3.050587       0.245365       0.124000       0.074800       0.057200   -9999.000000
54231     54231     neimenggu      122.3500       42.9667           68       209     2012      11        11        316              0.202458       3.462189       4.601636       0.273141   -9999.000000   -9999.000000       0.052900       1.000000
54231     54231     neimenggu      122.3500       42.9667           68       209     2012      11        12        317              0.178250       1.661438       0.995537       0.270707   -9999.000000   -9999.000000       0.039600       0.711000
54231     54231     neimenggu      122.3500       42.9667           68       209     2012      11        13        318              0.000000      -1.067810       0.000000       0.175894   -9999.000000   -9999.000000       0.035600       0.611000
54231     54231     neimenggu      122.3500       42.9667           68       209     2012      11        14        319              0.160292      -2.465912       0.000000       0.106248   -9999.000000   -9999.000000       0.031800       0.592000
54231     54231     neimenggu      122.3500       42.9667           68       209     2012      11        15        320              0.158125      -3.055145       0.000000       0.112789   -9999.000000   -9999.000000       0.033300       0.543000
54231     54231     neimenggu      122.3500       42.9667           68       209     2012      11        16        321              0.155083      -1.866608       0.000000       0.123865   -9999.000000   -9999.000000       0.029900       0.528000
54231     54231     neimenggu      122.3500       42.9667           68       209     2012      11        17        322              0.000000      -3.626221       0.000000       0.116353   -9999.000000   -9999.000000       0.022400       0.546000
54231     54231     neimenggu      122.3500       42.9667           68       209     2012      11        18        323              0.134583      -4.939941       0.000000       0.099269   -9999.000000   -9999.000000       0.031800       0.375000
54231     54231     neimenggu      122.3500       42.9667           68       209     2012      11        19        324              0.126292      -3.361511       0.000000       0.103221   -9999.000000   -9999.000000       0.022800       0.432000
54231     54231     neimenggu      122.3500       42.9667           68       209     2012      11        20        325              0.119042      -4.743713       0.000000       0.097992   -9999.000000   -9999.000000       0.023000       0.464000
54231     54231     neimenggu      122.3500       42.9667           68       209     2012      11        21        326              0.120125      -4.337036       0.000000       0.096111   -9999.000000   -9999.000000       0.023700       0.459000
54231     54231     neimenggu      122.3500       42.9667           68       209     2012      11        22        327              0.110875      -3.452972       0.000000       0.106580   -9999.000000   -9999.000000       0.021200       0.484000
54231     54231     neimenggu      122.3500       42.9667           68       209     2012      11        23        328              0.091583      -5.160278       0.000000       0.098732   -9999.000000   -9999.000000       0.025400   -9999.000000
54231     54231     neimenggu      122.3500       42.9667           68       209     2012      11        24        329              0.085375      -5.678864       0.000000       0.093668   -9999.000000   -9999.000000       0.028300       0.352000
54231     54231     neimenggu      122.3500       42.9667           68       209     2012      11        25        330              0.083333      -3.597687       0.000000       0.099997   -9999.000000       0.104400       0.020000       0.476000
54231     54231     neimenggu      122.3500       42.9667           68       209     2012      11        26        331              0.075958      -4.714447       0.000000       0.098540   -9999.000000   -9999.000000   -9999.000000   -9999.000000
54231     54231     neimenggu      122.3500       42.9667           68       209     2012      11        27        332              0.078292      -7.018250       0.000000       0.092896   -9999.000000   -9999.000000   -9999.000000       0.506000
54231     54231     neimenggu      122.3500       42.9667           68       209     2012      11        28        333              0.073458      -2.481323       0.000000       0.111986   -9999.000000   -9999.000000       0.023300       0.404000
54231     54231     neimenggu      122.3500       42.9667           68       209     2012      11        29        334              0.070542      -6.963928       0.000000       0.094124   -9999.000000       0.069600       0.023700       0.257000
54231     54231     neimenggu      122.3500       42.9667           68       209     2012      11        30        335              0.067917      -9.494507       0.000000       0.089720   -9999.000000       0.078200   -9999.000000       0.412000
54231     54231     neimenggu      122.3500       42.9667           68       209     2012      12        01        336              0.067917     -12.335175       0.000000       0.086196   -9999.000000       0.102900       0.025700       0.265000
54231     54231     neimenggu      122.3500       42.9667           68       209     2012      12        02        337              0.070542      -8.759766       0.000000       0.086223   -9999.000000       0.084600       0.024300       0.347000
54231     54231     neimenggu      122.3500       42.9667           68       209     2012      12        03        338              0.068958      -4.701385       0.000000       0.091180   -9999.000000   -9999.000000       0.022900       0.346000
54231     54231     neimenggu      122.3500       42.9667           68       209     2012      12        04        339              0.068000      -9.393005       0.000000       0.086781   -9999.000000       0.167100       0.024500   -9999.000000
54231     54231     neimenggu      122.3500       42.9667           68       209     2012      12        05        340              0.067083     -10.675842       0.000000       0.085582   -9999.000000   -9999.000000       0.026900       0.366000
54231     54231     neimenggu      122.3500       42.9667           68       209     2012      12        06        341              0.066000     -12.323975       0.000000       0.085035   -9999.000000   -9999.000000       0.020800       0.328000
54231     54231     neimenggu      122.3500       42.9667           68       209     2012      12        07        342              0.065375     -13.290741       0.000000       0.084419   -9999.000000   -9999.000000       0.021400       0.312000
54231     54231     neimenggu      122.3500       42.9667           68       209     2012      12        08        343              0.065042     -14.414032       0.000000       0.084071   -9999.000000   -9999.000000       0.023500       0.334000
54231     54231     neimenggu      122.3500       42.9667           68       209     2012      12        09        344              0.066792     -13.875519       0.000000       0.084102   -9999.000000   -9999.000000       0.021900   -9999.000000
54231     54231     neimenggu      122.3500       42.9667           68       209     2012      12        10        345              0.066625     -11.278687       0.000000       0.084967   -9999.000000   -9999.000000       0.021500       0.322000
54231     54231     neimenggu      122.3500       42.9667           68       209     2012      12        11        346              0.066708     -11.456848       0.000000       0.084763   -9999.000000   -9999.000000       0.022300       0.323000
54231     54231     neimenggu      122.3500       42.9667           68       209     2012      12        12        347              0.067542     -11.683228       0.000000       0.084701   -9999.000000   -9999.000000       0.019500       0.245000
54231     54231     neimenggu      122.3500       42.9667           68       209     2012      12        13        348              0.067917      -8.944336       0.000000       0.085332   -9999.000000   -9999.000000       0.018900       0.353000
54231     54231     neimenggu      122.3500       42.9667           68       209     2012      12        14        349              0.067333      -8.763947       0.000000       0.085814   -9999.000000   -9999.000000       0.019800       0.158000
54231     54231     neimenggu      122.3500       42.9667           68       209     2012      12        15        350              0.000000     -10.374451       0.000000       0.085162   -9999.000000   -9999.000000       0.015200       0.297000
54231     54231     neimenggu      122.3500       42.9667           68       209     2012      12        16        351              0.066583     -12.366699       0.000000       0.084500   -9999.000000   -9999.000000       0.019700       0.293000
54231     54231     neimenggu      122.3500       42.9667           68       209     2012      12        17        352              0.065958     -12.326691       0.000000       0.084150   -9999.000000   -9999.000000   -9999.000000       0.146000
54231     54231     neimenggu      122.3500       42.9667           68       209     2012      12        18        353              0.065292     -13.130829       0.000000       0.083827   -9999.000000   -9999.000000   -9999.000000       0.261000
54231     54231     neimenggu      122.3500       42.9667           68       209     2012      12        19        354              0.065333     -14.803650       0.000000       0.083199   -9999.000000   -9999.000000       0.021300       0.210000
54231     54231     neimenggu      122.3500       42.9667           68       209     2012      12        20        355              0.000000     -13.021851       1.149927       0.083416   -9999.000000   -9999.000000       0.015100       0.321000
54231     54231     neimenggu      122.3500       42.9667           68       209     2012      12        21        356              0.067333      -9.766785       0.000000       0.084064   -9999.000000   -9999.000000       0.016800       0.274000
54231     54231     neimenggu      122.3500       42.9667           68       209     2012      12        22        357              0.065625     -10.627441       0.000000       0.084965   -9999.000000   -9999.000000       0.019600   -9999.000000
54231     54231     neimenggu      122.3500       42.9667           68       209     2012      12        23        358              0.065000     -12.749603       0.000000       0.084645   -9999.000000   -9999.000000   -9999.000000       0.171000
54231     54231     neimenggu      122.3500       42.9667           68       209     2012      12        24        359              0.065000     -15.248749       0.000000       0.083531   -9999.000000   -9999.000000       0.016900       0.270000
54231     54231     neimenggu      122.3500       42.9667           68       209     2012      12        25        360              0.065000     -14.191772       0.197333       0.083206   -9999.000000   -9999.000000       0.019600   -9999.000000
54231     54231     neimenggu      122.3500       42.9667           68       209     2012      12        26        361              0.000000     -16.459625       0.000000       0.082470   -9999.000000   -9999.000000       0.021900       0.301000
54231     54231     neimenggu      122.3500       42.9667           68       209     2012      12        27        362              0.065545     -14.300720       0.000000       0.082204   -9999.000000   -9999.000000       0.022900       0.290000
54231     54231     neimenggu      122.3500       42.9667           68       209     2012      12        28        363              0.065000     -12.230621       1.873644       0.082478   -9999.000000   -9999.000000       0.019500       0.142000
54231     54231     neimenggu      122.3500       42.9667           68       209     2012      12        29        364              0.000000     -11.617737       0.138198       0.082694   -9999.000000   -9999.000000   -9999.000000       0.211000
54231     54231     neimenggu      122.3500       42.9667           68       209     2012      12        30        365              0.000000      -9.793701       0.000000       0.082848   -9999.000000   -9999.000000       0.019600   -9999.000000
54231     54231     neimenggu      122.3500       42.9667           68       209     2012      12        31        366              0.065000      -9.139038       0.000000       0.082972   -9999.000000   -9999.000000       0.016900       0.210000
