# Supplementary material for: Research on Fusing Multisatellite Soil Moisture Data Based on Bayesian Model Averaging
Source: Hindawi journal article supplement (doi:10.1155/2018/9310838), 2018-06-25
Supplement: f1 [file 9310838.f1.zip › 2012_sm00-10cm_daily_ZDB_ZHY_54305_366days_allin.txt]

54305     54305     neimenggu      115.2786       41.8883           72       181     2012      01        01        001              0.000000   -9999.000000       0.000000   -9999.000000   -9999.000000   -9999.000000       0.042100   -9999.000000
54305     54305     neimenggu      115.2786       41.8883           72       181     2012      01        02        002              0.000000     -14.026062       0.000000       0.083231   -9999.000000   -9999.000000       0.037300       0.003000
54305     54305     neimenggu      115.2786       41.8883           72       181     2012      01        03        003              0.000000     -16.924744       0.000000       0.083338   -9999.000000   -9999.000000       0.040300       0.061000
54305     54305     neimenggu      115.2786       41.8883           72       181     2012      01        04        004              0.000000     -18.776154       0.000000       0.082979   -9999.000000   -9999.000000       0.040300       0.045000
54305     54305     neimenggu      115.2786       41.8883           72       181     2012      01        05        005              0.000000     -16.469543       0.000000       0.082941   -9999.000000   -9999.000000       0.040500       0.052000
54305     54305     neimenggu      115.2786       41.8883           72       181     2012      01        06        006              0.000000     -16.513947       0.000000       0.082980   -9999.000000   -9999.000000       0.041900       0.019000
54305     54305     neimenggu      115.2786       41.8883           72       181     2012      01        07        007              0.000000     -16.609863       0.000000       0.082695   -9999.000000   -9999.000000       0.036800       0.006000
54305     54305     neimenggu      115.2786       41.8883           72       181     2012      01        08        008              0.000000     -15.410034       0.000000       0.083021   -9999.000000   -9999.000000       0.039400       0.056000
54305     54305     neimenggu      115.2786       41.8883           72       181     2012      01        09        009              0.000000     -15.761780       0.000000       0.083060   -9999.000000   -9999.000000       0.038000   -9999.000000
54305     54305     neimenggu      115.2786       41.8883           72       181     2012      01        10        010              0.000000     -15.092316       0.000000       0.083159   -9999.000000   -9999.000000       0.039500       0.068000
54305     54305     neimenggu      115.2786       41.8883           72       181     2012      01        11        011              0.000000     -17.050415       0.000000       0.082959   -9999.000000   -9999.000000       0.040600       0.018000
54305     54305     neimenggu      115.2786       41.8883           72       181     2012      01        12        012              0.000000     -14.612640       0.000000       0.082941   -9999.000000   -9999.000000       0.036200       0.098000
54305     54305     neimenggu      115.2786       41.8883           72       181     2012      01        13        013              0.000000     -14.199615       0.000000       0.083368   -9999.000000   -9999.000000       0.036400       0.090000
54305     54305     neimenggu      115.2786       41.8883           72       181     2012      01        14        014              0.000000     -13.750519       0.000000       0.083250   -9999.000000   -9999.000000       0.038400   -9999.000000
54305     54305     neimenggu      115.2786       41.8883           72       181     2012      01        15        015              0.000000     -14.192749       0.000000       0.083013   -9999.000000   -9999.000000       0.037200       0.104000
54305     54305     neimenggu      115.2786       41.8883           72       181     2012      01        16        016              0.000000     -12.355896       0.000000       0.083220   -9999.000000   -9999.000000       0.037700       0.031000
54305     54305     neimenggu      115.2786       41.8883           72       181     2012      01        17        017              0.000000     -11.900574       0.000000       0.083477   -9999.000000   -9999.000000       0.037900       0.137000
54305     54305     neimenggu      115.2786       41.8883           72       181     2012      01        18        018              0.000000     -12.777100       0.000000       0.083291   -9999.000000   -9999.000000       0.037700       0.124000
54305     54305     neimenggu      115.2786       41.8883           72       181     2012      01        19        019              0.000000     -11.889496       0.000000       0.083163   -9999.000000   -9999.000000       0.034300   -9999.000000
54305     54305     neimenggu      115.2786       41.8883           72       181     2012      01        20        020              0.000000     -14.526978       0.000000       0.082858   -9999.000000   -9999.000000       0.036900       0.104000
54305     54305     neimenggu      115.2786       41.8883           72       181     2012      01        21        021              0.000000     -19.961838       0.000000       0.081682   -9999.000000   -9999.000000       0.037700       0.052000
54305     54305     neimenggu      115.2786       41.8883           72       181     2012      01        22        022              0.000000     -20.965210       0.000000       0.081399   -9999.000000   -9999.000000       0.038400       0.108000
54305     54305     neimenggu      115.2786       41.8883           72       181     2012      01        23        023              0.000000     -20.103516       0.000000       0.081538   -9999.000000   -9999.000000       0.036800       0.077000
54305     54305     neimenggu      115.2786       41.8883           72       181     2012      01        24        024              0.000000     -18.270981       0.000000       0.081956   -9999.000000   -9999.000000   -9999.000000       0.091000
54305     54305     neimenggu      115.2786       41.8883           72       181     2012      01        25        025              0.000000     -18.633896       0.000000       0.082044   -9999.000000   -9999.000000       0.035600       0.076000
54305     54305     neimenggu      115.2786       41.8883           72       181     2012      01        26        026              0.000000     -16.007996       0.000000       0.082435   -9999.000000   -9999.000000       0.034300       0.065000
54305     54305     neimenggu      115.2786       41.8883           72       181     2012      01        27        027              0.000000     -16.616425       0.000000       0.082165   -9999.000000   -9999.000000       0.036000       0.059000
54305     54305     neimenggu      115.2786       41.8883           72       181     2012      01        28        028              0.000000     -14.778107       0.000000       0.082176   -9999.000000   -9999.000000       0.035700       0.059000
54305     54305     neimenggu      115.2786       41.8883           72       181     2012      01        29        029              0.000000     -17.582275       0.000000       0.082055   -9999.000000   -9999.000000       0.032100       0.142000
54305     54305     neimenggu      115.2786       41.8883           72       181     2012      01        30        030              0.000000     -17.653091       0.000000       0.081704   -9999.000000   -9999.000000       0.033200       0.048000
54305     54305     neimenggu      115.2786       41.8883           72       181     2012      01        31        031              0.000000     -16.243317       0.000000       0.081920   -9999.000000   -9999.000000       0.035600       0.026000
54305     54305     neimenggu      115.2786       41.8883           72       181     2012      02        01        032              0.000000     -19.957275       0.000000       0.081412   -9999.000000   -9999.000000       0.038300       0.117000
54305     54305     neimenggu      115.2786       41.8883           72       181     2012      02        02        033              0.000000     -20.707962       0.000000       0.081323   -9999.000000   -9999.000000       0.037700       0.077000
54305     54305     neimenggu      115.2786       41.8883           72       181     2012      02        03        034              0.000000     -18.563400       0.000000       0.081616   -9999.000000   -9999.000000       0.038400       0.079000
54305     54305     neimenggu      115.2786       41.8883           72       181     2012      02        04        035              0.000000     -17.315704       0.000000       0.081971   -9999.000000   -9999.000000       0.034700       0.052000
54305     54305     neimenggu      115.2786       41.8883           72       181     2012      02        05        036              0.000000     -13.433167       0.000000       0.082561   -9999.000000   -9999.000000       0.034300       0.035000
54305     54305     neimenggu      115.2786       41.8883           72       181     2012      02        06        037              0.000000     -12.852051       0.000000       0.082856   -9999.000000   -9999.000000       0.035600       0.103000
54305     54305     neimenggu      115.2786       41.8883           72       181     2012      02        07        038              0.000000     -19.647278       0.000000       0.081605   -9999.000000   -9999.000000       0.038100   -9999.000000
54305     54305     neimenggu      115.2786       41.8883           72       181     2012      02        08        039              0.000000     -18.973038       0.000000       0.081639   -9999.000000   -9999.000000       0.036700       0.169000
54305     54305     neimenggu      115.2786       41.8883           72       181     2012      02        09        040              0.000000     -16.854126       0.000000       0.082151   -9999.000000   -9999.000000       0.038500       0.040000
54305     54305     neimenggu      115.2786       41.8883           72       181     2012      02        10        041              0.000000     -14.964020       0.270491       0.082385   -9999.000000   -9999.000000       0.032600       0.102000
54305     54305     neimenggu      115.2786       41.8883           72       181     2012      02        11        042              0.000000     -13.194183       0.000000       0.082495   -9999.000000   -9999.000000       0.034700       0.117000
54305     54305     neimenggu      115.2786       41.8883           72       181     2012      02        12        043              0.000000     -12.954071       0.000000       0.082643   -9999.000000   -9999.000000       0.034800   -9999.000000
54305     54305     neimenggu      115.2786       41.8883           72       181     2012      02        13        044              0.000000      -9.273560       0.000000       0.085599   -9999.000000   -9999.000000   -9999.000000       0.182000
54305     54305     neimenggu      115.2786       41.8883           72       181     2012      02        14        045              0.000000      -9.038452       0.000000       0.088492   -9999.000000   -9999.000000       0.037700       0.097000
54305     54305     neimenggu      115.2786       41.8883           72       181     2012      02        15        046              0.000000     -13.569397       0.000000       0.082150   -9999.000000   -9999.000000       0.034900       0.148000
54305     54305     neimenggu      115.2786       41.8883           72       181     2012      02        16        047              0.000000     -12.863983       0.000000       0.082119   -9999.000000   -9999.000000       0.034100       0.118000
54305     54305     neimenggu      115.2786       41.8883           72       181     2012      02        17        048              0.000000     -15.334778       0.000000       0.081864   -9999.000000   -9999.000000       0.035200   -9999.000000
54305     54305     neimenggu      115.2786       41.8883           72       181     2012      02        18        049              0.000000     -16.181396       0.000000       0.081686   -9999.000000   -9999.000000       0.038600       0.126000
54305     54305     neimenggu      115.2786       41.8883           72       181     2012      02        19        050              0.000000     -13.762543       0.000000       0.081981   -9999.000000   -9999.000000       0.037500       0.071000
54305     54305     neimenggu      115.2786       41.8883           72       181     2012      02        20        051              0.000000     -10.316101       0.000000       0.082468   -9999.000000   -9999.000000       0.038900       0.118000
54305     54305     neimenggu      115.2786       41.8883           72       181     2012      02        21        052              0.000000      -7.663666       0.000000       0.093746   -9999.000000   -9999.000000   -9999.000000       0.173000
54305     54305     neimenggu      115.2786       41.8883           72       181     2012      02        22        053              0.000000      -3.401550       0.000000       0.120731   -9999.000000   -9999.000000       0.037700       0.186000
54305     54305     neimenggu      115.2786       41.8883           72       181     2012      02        23        054              0.000000      -8.193542       0.000000       0.099061   -9999.000000   -9999.000000       0.040500       0.166000
54305     54305     neimenggu      115.2786       41.8883           72       181     2012      02        24        055              0.000000      -6.669830       0.000000       0.096962   -9999.000000   -9999.000000       0.036200       0.075000
54305     54305     neimenggu      115.2786       41.8883           72       181     2012      02        25        056              0.000000     -10.173920       0.000000       0.090051   -9999.000000   -9999.000000       0.037700       0.111000
54305     54305     neimenggu      115.2786       41.8883           72       181     2012      02        26        057              0.000000     -11.006134       0.000000       0.087757   -9999.000000   -9999.000000       0.040400       0.121000
54305     54305     neimenggu      115.2786       41.8883           72       181     2012      02        27        058              0.000000      -9.514862       0.000000       0.089139   -9999.000000   -9999.000000   -9999.000000       0.190000
54305     54305     neimenggu      115.2786       41.8883           72       181     2012      02        28        059              0.000000      -6.832764       0.000000       0.104163   -9999.000000   -9999.000000       0.043200       0.135000
54305     54305     neimenggu      115.2786       41.8883           72       181     2012      02        29        060              0.000000   -9999.000000       0.000000   -9999.000000       0.088000       0.093800   -9999.000000   -9999.000000
54305     54305     neimenggu      115.2786       41.8883           72       181     2012      03        01        061              0.000000      -2.539703       0.000000       0.133260   -9999.000000       0.096500       0.042900       0.156000
54305     54305     neimenggu      115.2786       41.8883           72       181     2012      03        02        062              0.000000      -6.376495       0.000000       0.106173   -9999.000000   -9999.000000       0.044500       0.157000
54305     54305     neimenggu      115.2786       41.8883           72       181     2012      03        03        063              0.000000      -4.317505       0.506668       0.117396   -9999.000000   -9999.000000       0.044500       0.199000
54305     54305     neimenggu      115.2786       41.8883           72       181     2012      03        04        064              0.000000      -3.492859       0.000000       0.122071   -9999.000000   -9999.000000       0.051200       0.106000
54305     54305     neimenggu      115.2786       41.8883           72       181     2012      03        05        065              0.000000      -2.009674       0.000000       0.138728   -9999.000000   -9999.000000       0.044300       0.055000
54305     54305     neimenggu      115.2786       41.8883           72       181     2012      03        06        066              0.000000      -6.836456       0.000000       0.103844   -9999.000000   -9999.000000       0.041700       0.179000
54305     54305     neimenggu      115.2786       41.8883           72       181     2012      03        07        067              0.000000      -6.579956       0.000000       0.093696   -9999.000000   -9999.000000       0.043500   -9999.000000
54305     54305     neimenggu      115.2786       41.8883           72       181     2012      03        08        068              0.000000     -10.472931       0.000000       0.091038   -9999.000000   -9999.000000       0.044700       0.268000
54305     54305     neimenggu      115.2786       41.8883           72       181     2012      03        09        069              0.000000     -10.571075       0.000000       0.087799   -9999.000000   -9999.000000       0.044700       0.265000
54305     54305     neimenggu      115.2786       41.8883           72       181     2012      03        10        070              0.000000      -6.385712       0.000000       0.106406   -9999.000000   -9999.000000       0.040700       0.219000
54305     54305     neimenggu      115.2786       41.8883           72       181     2012      03        11        071              0.000000     -11.964355       0.000000       0.090009   -9999.000000   -9999.000000       0.042100       0.166000
54305     54305     neimenggu      115.2786       41.8883           72       181     2012      03        12        072              0.000000      -9.565918       0.000000       0.088460   -9999.000000   -9999.000000       0.047500   -9999.000000
54305     54305     neimenggu      115.2786       41.8883           72       181     2012      03        13        073              0.000000      -5.690765       0.000000       0.103346   -9999.000000   -9999.000000       0.048500       0.286000
54305     54305     neimenggu      115.2786       41.8883           72       181     2012      03        14        074              0.000000      -4.744385       0.000000       0.119657   -9999.000000   -9999.000000   -9999.000000       0.169000
54305     54305     neimenggu      115.2786       41.8883           72       181     2012      03        15        075              0.000000      -1.649445       0.000000       0.144690   -9999.000000   -9999.000000       0.068000       0.371000
54305     54305     neimenggu      115.2786       41.8883           72       181     2012      03        16        076              0.000000       1.787811       1.164360       0.188827       0.133000   -9999.000000       0.085500       0.188000
54305     54305     neimenggu      115.2786       41.8883           72       181     2012      03        17        077              0.000000       2.530121       0.000000       0.194697   -9999.000000   -9999.000000       0.057400   -9999.000000
54305     54305     neimenggu      115.2786       41.8883           72       181     2012      03        18        078              0.000000      -0.104889       0.000000       0.169681       0.098000       0.016600       0.058000       0.325000
54305     54305     neimenggu      115.2786       41.8883           72       181     2012      03        19        079              0.000000      -2.622040       0.000000       0.139661   -9999.000000   -9999.000000       0.065300       0.114000
54305     54305     neimenggu      115.2786       41.8883           72       181     2012      03        20        080              0.000000      -1.514954       0.000000       0.149204   -9999.000000       0.051800       0.070300       0.391000
54305     54305     neimenggu      115.2786       41.8883           72       181     2012      03        21        081              0.000000       1.628693       0.000000       0.179996       0.111000   -9999.000000       0.071300       0.146000
54305     54305     neimenggu      115.2786       41.8883           72       181     2012      03        22        082              0.000000       1.983398       2.204913       0.185809       0.108000   -9999.000000       0.072900       0.404000
54305     54305     neimenggu      115.2786       41.8883           72       181     2012      03        23        083              0.000000       2.401245       0.642205       0.197816   -9999.000000   -9999.000000       0.063200       0.180000
54305     54305     neimenggu      115.2786       41.8883           72       181     2012      03        24        084              0.000000      -1.246490       0.000000       0.148319   -9999.000000   -9999.000000   -9999.000000       0.161000
54305     54305     neimenggu      115.2786       41.8883           72       181     2012      03        25        085              0.000000      -0.996063       0.000000       0.155680   -9999.000000       0.030600       0.067800       0.155000
54305     54305     neimenggu      115.2786       41.8883           72       181     2012      03        26        086              0.000000       1.565216       0.000000       0.180238       0.109000   -9999.000000       0.085000   -9999.000000
54305     54305     neimenggu      115.2786       41.8883           72       181     2012      03        27        087              0.000000       3.683197       0.000000       0.200386       0.113000       0.182800       0.083300       0.485000
54305     54305     neimenggu      115.2786       41.8883           72       181     2012      03        28        088              0.000000       4.953369       0.794369       0.206534       0.106000       0.060900       0.081200       0.343000
54305     54305     neimenggu      115.2786       41.8883           72       181     2012      03        29        089              0.000000       6.246338       0.000000       0.234543       0.110000       0.218200       0.066600       0.086000
54305     54305     neimenggu      115.2786       41.8883           72       181     2012      03        30        090              0.000000       2.619812       0.652462       0.189154   -9999.000000       0.072800       0.073700       0.088000
54305     54305     neimenggu      115.2786       41.8883           72       181     2012      03        31        091              0.000000      -1.644989       0.000000       0.140838       0.112000       0.092900   -9999.000000       0.146000
54305     54305     neimenggu      115.2786       41.8883           72       181     2012      04        01        092              0.000000       0.926880       0.000000       0.170527       0.119000   -9999.000000       0.075500       0.301000
54305     54305     neimenggu      115.2786       41.8883           72       181     2012      04        02        093              0.000000       3.532501       0.000000       0.200933       0.101000       0.096500       0.079600       0.050000
54305     54305     neimenggu      115.2786       41.8883           72       181     2012      04        03        094              0.000000       1.399963       0.000000       0.175595       0.088000       0.161000       0.080400       0.098000
54305     54305     neimenggu      115.2786       41.8883           72       181     2012      04        04        095              0.000000       2.978882       0.000000       0.200351   -9999.000000   -9999.000000       0.077300       0.069000
54305     54305     neimenggu      115.2786       41.8883           72       181     2012      04        05        096              0.000000       2.426239       1.480853       0.189706   -9999.000000       0.054400       0.080800   -9999.000000
54305     54305     neimenggu      115.2786       41.8883           72       181     2012      04        06        097              0.000000       2.144684       0.000000       0.192458       0.104000   -9999.000000       0.071200       0.174000
54305     54305     neimenggu      115.2786       41.8883           72       181     2012      04        07        098              0.000000       5.443512       0.000000       0.220392       0.095000   -9999.000000       0.072200       0.036000
54305     54305     neimenggu      115.2786       41.8883           72       181     2012      04        08        099              0.000000       7.765015       0.000000       0.217916       0.091000   -9999.000000       0.071800       0.151000
54305     54305     neimenggu      115.2786       41.8883           72       181     2012      04        09        100              0.000000       6.759338       0.000000       0.224333       0.099000   -9999.000000       0.081900       0.163000
54305     54305     neimenggu      115.2786       41.8883           72       181     2012      04        10        101              0.000000      11.658813       0.198830       0.225414   -9999.000000       0.081800       0.080200   -9999.000000
54305     54305     neimenggu      115.2786       41.8883           72       181     2012      04        11        102              0.000000       7.618500       0.116159       0.205045       0.084000       0.182300       0.082600       0.136000
54305     54305     neimenggu      115.2786       41.8883           72       181     2012      04        12        103              0.000000       5.194000       0.029987       0.214168       0.096000       0.017100       0.073300       0.030000
54305     54305     neimenggu      115.2786       41.8883           72       181     2012      04        13        104              0.000000       8.232208       0.000000       0.223134       0.087000   -9999.000000       0.072000       0.168000
54305     54305     neimenggu      115.2786       41.8883           72       181     2012      04        14        105              0.000000      10.846222       0.000000       0.220560       0.085000       0.099200       0.072200       0.054000
54305     54305     neimenggu      115.2786       41.8883           72       181     2012      04        15        106              0.000000      11.172485       0.090229       0.216541   -9999.000000   -9999.000000       0.078300   -9999.000000
54305     54305     neimenggu      115.2786       41.8883           72       181     2012      04        16        107              0.000000       6.406769       0.000000       0.200766       0.083000   -9999.000000       0.081400       0.199000
54305     54305     neimenggu      115.2786       41.8883           72       181     2012      04        17        108              0.000000       8.843109       0.000000       0.215149       0.093000       0.029400   -9999.000000       0.087000
54305     54305     neimenggu      115.2786       41.8883           72       181     2012      04        18        109              0.000000      13.131989       0.154113       0.210643       0.083000   -9999.000000   -9999.000000       0.074000
54305     54305     neimenggu      115.2786       41.8883           72       181     2012      04        19        110              0.000000      12.688507       0.000000       0.211454       0.086000   -9999.000000       0.071300       0.060000
54305     54305     neimenggu      115.2786       41.8883           72       181     2012      04        20        111              0.000000      10.775665       0.000000       0.209150       0.089000       0.055600       0.092900       0.003000
54305     54305     neimenggu      115.2786       41.8883           72       181     2012      04        21        112              0.000000      12.199890       0.000000       0.205343       0.089000   -9999.000000       0.076900       0.101000
54305     54305     neimenggu      115.2786       41.8883           72       181     2012      04        22        113              0.000000      13.121674       0.000000       0.201640       0.092000   -9999.000000       0.081800       0.143000
54305     54305     neimenggu      115.2786       41.8883           72       181     2012      04        23        114              0.000000      16.536987      17.355446       0.195107       0.089000   -9999.000000       0.075800       0.259000
54305     54305     neimenggu      115.2786       41.8883           72       181     2012      04        24        115              0.000000      14.568390       0.151416       0.244514       0.175000       0.278000       0.109000       0.134000
54305     54305     neimenggu      115.2786       41.8883           72       181     2012      04        25        116              0.000000       6.621735       0.000000       0.273891   -9999.000000   -9999.000000       0.079400       0.108000
54305     54305     neimenggu      115.2786       41.8883           72       181     2012      04        26        117              0.000000       6.204163       0.203190       0.251261       0.107000       0.191300       0.085900       0.034000
54305     54305     neimenggu      115.2786       41.8883           72       181     2012      04        27        118              0.000000      10.362488       0.000000       0.248931       0.099000   -9999.000000   -9999.000000       0.103000
54305     54305     neimenggu      115.2786       41.8883           72       181     2012      04        28        119              0.000000       4.990479       4.631445       0.221180       0.099000       0.167900       0.094100       0.052000
54305     54305     neimenggu      115.2786       41.8883           72       181     2012      04        29        120              0.000000       9.443268       0.000000       0.237910       0.092000   -9999.000000       0.077900       0.016000
54305     54305     neimenggu      115.2786       41.8883           72       181     2012      04        30        121              0.000000      14.722809       0.843652       0.231112       0.091000   -9999.000000       0.092800       0.060000
54305     54305     neimenggu      115.2786       41.8883           72       181     2012      05        01        122              0.000000      12.668915       3.057126       0.236383   -9999.000000   -9999.000000       0.115700       0.320000
54305     54305     neimenggu      115.2786       41.8883           72       181     2012      05        02        123              0.000000      14.575439       0.000000       0.246912       0.094000       0.168900       0.092000       0.052000
54305     54305     neimenggu      115.2786       41.8883           72       181     2012      05        03        124              0.000000      14.963409       0.000000       0.241039       0.094000       0.137000       0.090800       0.091000
54305     54305     neimenggu      115.2786       41.8883           72       181     2012      05        04        125              0.000000      17.659790       0.000000       0.229649       0.082000   -9999.000000       0.074800   -9999.000000
54305     54305     neimenggu      115.2786       41.8883           72       181     2012      05        05        126              0.000000      17.470581       0.000000       0.219514       0.090000       0.180900       0.073800       0.057000
54305     54305     neimenggu      115.2786       41.8883           72       181     2012      05        06        127              0.000000      17.322357       0.000000       0.212992       0.078000       0.048400       0.072900       0.024000
54305     54305     neimenggu      115.2786       41.8883           72       181     2012      05        07        128              0.000000      19.603485       0.000000       0.206390   -9999.000000   -9999.000000       0.089000       0.068000
54305     54305     neimenggu      115.2786       41.8883           72       181     2012      05        08        129              0.000000      18.099854       0.000000       0.201432       0.086500   -9999.000000       0.084200       0.129000
54305     54305     neimenggu      115.2786       41.8883           72       181     2012      05        09        130              0.000000      18.175995       0.498785       0.195919       0.082000   -9999.000000       0.106800   -9999.000000
54305     54305     neimenggu      115.2786       41.8883           72       181     2012      05        10        131              0.000000      18.418304       8.401576       0.201565       0.086500   -9999.000000       0.074200       0.150000
54305     54305     neimenggu      115.2786       41.8883           72       181     2012      05        11        132              0.000000      21.204742      10.287959       0.213478   -9999.000000       0.244000       0.197700       0.755000
54305     54305     neimenggu      115.2786       41.8883           72       181     2012      05        12        133              0.000000      12.734924       0.057512       0.292888   -9999.000000       0.315200       0.128300       0.672000
54305     54305     neimenggu      115.2786       41.8883           72       181     2012      05        13        134              0.000000      11.626129       0.000000       0.267658       0.123000       0.166300       0.094700       0.199000
54305     54305     neimenggu      115.2786       41.8883           72       181     2012      05        14        135              0.000000       9.347198       0.000000       0.255852       0.098000       0.265100       0.093200   -9999.000000
54305     54305     neimenggu      115.2786       41.8883           72       181     2012      05        15        136              0.000000       8.833923       0.000000       0.248829       0.091000   -9999.000000       0.100800       0.148000
54305     54305     neimenggu      115.2786       41.8883           72       181     2012      05        16        137              0.000000      10.240295       1.763593       0.243860       0.110000       0.226800       0.081800       0.086000
54305     54305     neimenggu      115.2786       41.8883           72       181     2012      05        17        138              0.000000      12.922913       0.000000       0.238266       0.100000   -9999.000000       0.075200       0.106000
54305     54305     neimenggu      115.2786       41.8883           72       181     2012      05        18        139              0.000000      18.507599       0.000000       0.228212       0.096000   -9999.000000       0.074600       0.152000
54305     54305     neimenggu      115.2786       41.8883           72       181     2012      05        19        140              0.000000      20.008545       0.000000       0.218324       0.094000   -9999.000000       0.082300       0.073000
54305     54305     neimenggu      115.2786       41.8883           72       181     2012      05        20        141              0.000000      19.571716       0.000000       0.212950       0.083000   -9999.000000       0.086400       0.150000
54305     54305     neimenggu      115.2786       41.8883           72       181     2012      05        21        142              0.000000      21.098236       0.823681       0.206901       0.131000       0.047600       0.084600       0.098000
54305     54305     neimenggu      115.2786       41.8883           72       181     2012      05        22        143              0.000000      18.467987       0.000000       0.210828       0.100000   -9999.000000       0.076900       0.114000
54305     54305     neimenggu      115.2786       41.8883           72       181     2012      05        23        144              0.000000      14.440491       0.000000       0.208845   -9999.000000       0.021600       0.075900       0.074000
54305     54305     neimenggu      115.2786       41.8883           72       181     2012      05        24        145              0.000000      15.166687       0.000000       0.202158       0.102000       0.021600       0.086900       0.069000
54305     54305     neimenggu      115.2786       41.8883           72       181     2012      05        25        146              0.000000      14.648438       0.000000       0.197467       0.105000       0.268500       0.086200       0.100000
54305     54305     neimenggu      115.2786       41.8883           72       181     2012      05        26        147              0.000000      17.282562       0.000000       0.192043       0.100000       0.017900       0.088200       0.114000
54305     54305     neimenggu      115.2786       41.8883           72       181     2012      05        27        148              0.000000      19.535767       0.000000       0.184393       0.094000   -9999.000000       0.074500       0.178000
54305     54305     neimenggu      115.2786       41.8883           72       181     2012      05        28        149              0.000000      21.723206       1.051893       0.176333       0.095000       0.091700       0.075600       0.193000
54305     54305     neimenggu      115.2786       41.8883           72       181     2012      05        29        150              0.000000      22.403595       8.529709       0.171876       0.215000       0.082100       0.169000       0.703000
54305     54305     neimenggu      115.2786       41.8883           72       181     2012      05        30        151              0.000000      12.291138       0.033641       0.258549       0.103000       0.184300       0.087900   -9999.000000
54305     54305     neimenggu      115.2786       41.8883           72       181     2012      05        31        152              0.000000      14.591492       5.283941       0.234464       0.135500       0.093400   -9999.000000   -9999.000000
54305     54305     neimenggu      115.2786       41.8883           72       181     2012      06        01        153              0.000000      13.819214       0.000000       0.256297       0.126000   -9999.000000       0.108700       0.227000
54305     54305     neimenggu      115.2786       41.8883           72       181     2012      06        02        154              0.000000      13.734406       2.831305       0.244180       0.169000   -9999.000000       0.082400   -9999.000000
54305     54305     neimenggu      115.2786       41.8883           72       181     2012      06        03        155              0.000000      16.703217       5.967169       0.240707       0.127500       0.112300       0.092600       0.579000
54305     54305     neimenggu      115.2786       41.8883           72       181     2012      06        04        156              0.000000      16.667511       0.000000       0.271912       0.099000       0.252300       0.100200       0.087000
54305     54305     neimenggu      115.2786       41.8883           72       181     2012      06        05        157              0.000000      17.800171       0.000000       0.247901       0.103000       0.104600       0.092000       0.149000
54305     54305     neimenggu      115.2786       41.8883           72       181     2012      06        06        158              0.000000      20.627502       1.074322       0.234171       0.123000   -9999.000000       0.101500       0.159000
54305     54305     neimenggu      115.2786       41.8883           72       181     2012      06        07        159              0.000000      17.712677       0.000000       0.238528       0.102000       0.178700       0.083800   -9999.000000
54305     54305     neimenggu      115.2786       41.8883           72       181     2012      06        08        160              0.000000      19.483124       1.822097       0.225019       0.112000       0.031000       0.100800       0.142000
54305     54305     neimenggu      115.2786       41.8883           72       181     2012      06        09        161              0.000000      20.026459       0.000000       0.227918       0.118000   -9999.000000       0.080500       0.074000
54305     54305     neimenggu      115.2786       41.8883           72       181     2012      06        10        162              0.000000      16.220490       0.000000       0.221033       0.103000       0.109700       0.090700       0.115000
54305     54305     neimenggu      115.2786       41.8883           72       181     2012      06        11        163              0.000000      16.025726       0.359664       0.212383       0.133500       0.037700       0.101500       0.545000
54305     54305     neimenggu      115.2786       41.8883           72       181     2012      06        12        164              0.000000      15.759613       6.969371       0.210811       0.155000       0.093900       0.143900   -9999.000000
54305     54305     neimenggu      115.2786       41.8883           72       181     2012      06        13        165              0.000000      14.519073      22.641417       0.230066       0.281000       0.252400       0.206700       0.683000
54305     54305     neimenggu      115.2786       41.8883           72       181     2012      06        14        166              0.000000      11.437897       4.237893       0.316457   -9999.000000   -9999.000000       0.193100       0.852000
54305     54305     neimenggu      115.2786       41.8883           72       181     2012      06        15        167              0.000000      12.223297       0.269593       0.296661       0.247000       0.209900       0.194200       0.804000
54305     54305     neimenggu      115.2786       41.8883           72       181     2012      06        16        168              0.000000      15.761627       2.252448       0.278651       0.180000       0.152900       0.138000       0.419000
54305     54305     neimenggu      115.2786       41.8883           72       181     2012      06        17        169              0.000000      19.080963       0.101257       0.272115       0.137000       0.250600       0.101400       0.287000
54305     54305     neimenggu      115.2786       41.8883           72       181     2012      06        18        170              0.000000      21.637146       0.328734       0.260581       0.101000       0.118100   -9999.000000       0.303000
54305     54305     neimenggu      115.2786       41.8883           72       181     2012      06        19        171              0.000000      23.267120       0.262680       0.248680       0.131000   -9999.000000       0.094500       0.316000
54305     54305     neimenggu      115.2786       41.8883           72       181     2012      06        20        172              0.000000      22.201965       0.410753       0.242247       0.134000   -9999.000000       0.092400       0.449000
54305     54305     neimenggu      115.2786       41.8883           72       181     2012      06        21        173              0.000000      21.680908       0.051860       0.238232       0.143000   -9999.000000       0.086200       0.237000
54305     54305     neimenggu      115.2786       41.8883           72       181     2012      06        22        174              0.000000      22.477509       3.770283       0.230683       0.185000   -9999.000000       0.093600       0.250000
54305     54305     neimenggu      115.2786       41.8883           72       181     2012      06        23        175              0.000000      22.967773      19.675835       0.245532       0.195000       0.070100       0.124800       0.645000
54305     54305     neimenggu      115.2786       41.8883           72       181     2012      06        24        176              0.000000      22.791931      12.625517       0.291490       0.227500       0.286100       0.121700       0.725000
54305     54305     neimenggu      115.2786       41.8883           72       181     2012      06        25        177              0.000000      19.746826       0.082992       0.312358       0.167000       0.127400       0.128600       0.453000
54305     54305     neimenggu      115.2786       41.8883           72       181     2012      06        26        178              0.000000      21.905212       3.948468       0.284445       0.202500       0.127800       0.154500       0.639000
54305     54305     neimenggu      115.2786       41.8883           72       181     2012      06        27        179              0.000000      19.918518       0.685965       0.288356       0.181000   -9999.000000       0.143000       0.610000
54305     54305     neimenggu      115.2786       41.8883           72       181     2012      06        28        180              0.000000      20.413269       2.046527       0.274648       0.212000       0.150200       0.148700       0.564000
54305     54305     neimenggu      115.2786       41.8883           72       181     2012      06        29        181              0.000000      17.485260       0.220477       0.279440       0.131000       0.187000       0.109600       0.481000
54305     54305     neimenggu      115.2786       41.8883           72       181     2012      06        30        182              0.000000      21.102875       0.000000       0.264514       0.121000       0.121400       0.086300   -9999.000000
54305     54305     neimenggu      115.2786       41.8883           72       181     2012      07        01        183              0.000000      22.953613       0.000000       0.251386       0.126000       0.064100       0.085300   -9999.000000
54305     54305     neimenggu      115.2786       41.8883           72       181     2012      07        02        184              0.000000      20.860443       0.000000       0.242252       0.139500   -9999.000000       0.090100       0.260000
54305     54305     neimenggu      115.2786       41.8883           72       181     2012      07        03        185              0.000000      21.573425       0.000000       0.235472       0.141000       0.085600       0.097000       0.249000
54305     54305     neimenggu      115.2786       41.8883           72       181     2012      07        04        186              0.000000      22.464081       0.550343       0.229748       0.153000   -9999.000000       0.115300       0.345000
54305     54305     neimenggu      115.2786       41.8883           72       181     2012      07        05        187              0.000000      24.518951      18.375525       0.224272       0.136000       0.245500   -9999.000000       0.793000
54305     54305     neimenggu      115.2786       41.8883           72       181     2012      07        06        188              0.000000      20.063202       0.361278       0.293872   -9999.000000       0.281400       0.179200   -9999.000000
54305     54305     neimenggu      115.2786       41.8883           72       181     2012      07        07        189              0.000000      22.144257      13.424926       0.276518   -9999.000000       0.314600       0.178100       0.643000
54305     54305     neimenggu      115.2786       41.8883           72       181     2012      07        08        190              0.000000      21.487183       0.039675       0.301805       0.240000   -9999.000000       0.149600       0.716000
54305     54305     neimenggu      115.2786       41.8883           72       181     2012      07        09        191              0.000000      24.034027       0.480708       0.278665       0.219000       0.215400       0.170300       0.677000
54305     54305     neimenggu      115.2786       41.8883           72       181     2012      07        10        192              0.000000      24.375458       0.718308       0.266331       0.172000       0.282500       0.197100       0.528000
54305     54305     neimenggu      115.2786       41.8883           72       181     2012      07        11        193              0.000000      23.819366       4.680983       0.258065       0.181000       0.169500       0.198200   -9999.000000
54305     54305     neimenggu      115.2786       41.8883           72       181     2012      07        12        194              0.000000      21.871613       1.102615       0.272196       0.235000       0.268000       0.190300       0.694000
54305     54305     neimenggu      115.2786       41.8883           72       181     2012      07        13        195              0.000000      20.724945       0.000000       0.267448       0.223000       0.116200       0.152300       0.547000
54305     54305     neimenggu      115.2786       41.8883           72       181     2012      07        14        196              0.000000      21.725189       0.000000       0.256762       0.196000       0.162900       0.138300       0.457000
54305     54305     neimenggu      115.2786       41.8883           72       181     2012      07        15        197              0.000000      21.692566       0.000000       0.247186       0.134000   -9999.000000       0.134700       0.338000
54305     54305     neimenggu      115.2786       41.8883           72       181     2012      07        16        198              0.000000      23.439117       0.000000       0.236495       0.147000       0.128900       0.150200       0.313000
54305     54305     neimenggu      115.2786       41.8883           72       181     2012      07        17        199              0.000000      24.679077       0.000000       0.227493       0.152000       0.013800       0.128500       0.427000
54305     54305     neimenggu      115.2786       41.8883           72       181     2012      07        18        200              0.000000      24.811066       4.089898       0.217608       0.185000       0.175100       0.133700       0.380000
54305     54305     neimenggu      115.2786       41.8883           72       181     2012      07        19        201              0.000000      24.188660      28.249088       0.240585   -9999.000000       0.141400       0.125700       0.619000
54305     54305     neimenggu      115.2786       41.8883           72       181     2012      07        20        202              0.152312      24.737244       4.252297       0.282753       0.242500   -9999.000000       0.186600       0.693000
54305     54305     neimenggu      115.2786       41.8883           72       181     2012      07        21        203              0.192750      23.497406      21.902037       0.307973       0.346000       0.233900       0.249800       0.899000
54305     54305     neimenggu      115.2786       41.8883           72       181     2012      07        22        204              0.174250      18.810303       0.000000       0.327461       0.343000       0.373600       0.232700       0.694000
54305     54305     neimenggu      115.2786       41.8883           72       181     2012      07        23        205              0.161083      20.308105       0.000000       0.292332       0.231500       0.270300       0.187300       0.500000
54305     54305     neimenggu      115.2786       41.8883           72       181     2012      07        24        206              0.154542      22.041992       1.421089       0.277460       0.246000       0.174000       0.164800       0.467000
54305     54305     neimenggu      115.2786       41.8883           72       181     2012      07        25        207              0.151000      24.190002       4.768619       0.270752       0.287000       0.288900       0.252900       0.659000
54305     54305     neimenggu      115.2786       41.8883           72       181     2012      07        26        208              0.147708      21.772736       0.000000       0.289371       0.228000   -9999.000000       0.169200       0.659000
54305     54305     neimenggu      115.2786       41.8883           72       181     2012      07        27        209              0.144042      21.953766      24.491426       0.271101       0.192000       0.103600       0.157700       0.737000
54305     54305     neimenggu      115.2786       41.8883           72       181     2012      07        28        210              0.142875      24.421661       6.703348       0.282803       0.337000       0.379300       0.245300       0.621000
54305     54305     neimenggu      115.2786       41.8883           72       181     2012      07        29        211              0.137917      21.426239       0.221110       0.317009       0.266500       0.190600       0.223300       0.726000
54305     54305     neimenggu      115.2786       41.8883           72       181     2012      07        30        212              0.146417      19.738190      14.196340       0.290627   -9999.000000   -9999.000000       0.230700   -9999.000000
54305     54305     neimenggu      115.2786       41.8883           72       181     2012      07        31        213              0.169542      20.075562       3.582375       0.302083       0.312500   -9999.000000       0.268200       0.988000
54305     54305     neimenggu      115.2786       41.8883           72       181     2012      08        01        214              0.160542      18.206116       6.688233       0.308317       0.320500       0.442500       0.241900       0.815000
54305     54305     neimenggu      115.2786       41.8883           72       181     2012      08        02        215              0.156417      19.917175       0.000000       0.306008       0.236000   -9999.000000       0.217900       0.797000
54305     54305     neimenggu      115.2786       41.8883           72       181     2012      08        03        216              0.156458      23.392761       0.807406       0.283698       0.233500       0.263000       0.185100       0.581000
54305     54305     neimenggu      115.2786       41.8883           72       181     2012      08        04        217              0.155542      24.110504       0.000000       0.277140       0.253000       0.198800       0.180900   -9999.000000
54305     54305     neimenggu      115.2786       41.8883           72       181     2012      08        05        218              0.148625      24.789032       0.176966       0.267723       0.284000       0.073600       0.167300       0.584000
54305     54305     neimenggu      115.2786       41.8883           72       181     2012      08        06        219              0.142917      24.763458       0.000000       0.259560       0.213500       0.083900       0.197100       0.431000
54305     54305     neimenggu      115.2786       41.8883           72       181     2012      08        07        220              0.135667      25.013397      10.776846       0.253007       0.183000   -9999.000000   -9999.000000       0.419000
54305     54305     neimenggu      115.2786       41.8883           72       181     2012      08        08        221              0.128458      23.941742       0.000000       0.284823       0.214000       0.239900       0.207100       0.528000
54305     54305     neimenggu      115.2786       41.8883           72       181     2012      08        09        222              0.120583      22.343414       0.000000       0.273170       0.228000       0.289400       0.181600   -9999.000000
54305     54305     neimenggu      115.2786       41.8883           72       181     2012      08        10        223              0.112625      22.257812       0.000000       0.259189       0.216000       0.206800       0.186900       0.548000
54305     54305     neimenggu      115.2786       41.8883           72       181     2012      08        11        224              0.108083      23.285706       0.716374       0.252050       0.213500       0.133400       0.211200       0.397000
54305     54305     neimenggu      115.2786       41.8883           72       181     2012      08        12        225              0.104000      18.864685       0.000000       0.255941       0.193000   -9999.000000       0.198400       0.422000
54305     54305     neimenggu      115.2786       41.8883           72       181     2012      08        13        226              0.099500      19.761475       0.267234       0.249308       0.173000   -9999.000000       0.218500       0.373000
54305     54305     neimenggu      115.2786       41.8883           72       181     2012      08        14        227              0.134542      20.402374      24.644482       0.242726       0.296000       0.167400       0.298500       0.326000
54305     54305     neimenggu      115.2786       41.8883           72       181     2012      08        15        228              0.150792      17.864380       0.000000       0.313592       0.252000       0.423500       0.291000       0.758000
54305     54305     neimenggu      115.2786       41.8883           72       181     2012      08        16        229              0.144750      18.715820       0.520057       0.286811       0.213000       0.171900       0.228900       0.449000
54305     54305     neimenggu      115.2786       41.8883           72       181     2012      08        17        230              0.140208      20.893402       0.718064       0.274470       0.238000       0.260700       0.240100       0.565000
54305     54305     neimenggu      115.2786       41.8883           72       181     2012      08        18        231              0.134875      20.203461       0.119448       0.273065       0.239000   -9999.000000       0.230500       0.447000
54305     54305     neimenggu      115.2786       41.8883           72       181     2012      08        19        232              0.131542      18.110382       0.468730       0.266295       0.205000       0.139600       0.259600       0.424000
54305     54305     neimenggu      115.2786       41.8883           72       181     2012      08        20        233              0.123375      21.237183       1.872442       0.258205       0.233000   -9999.000000       0.200700       0.296000
54305     54305     neimenggu      115.2786       41.8883           72       181     2012      08        21        234              0.115500      14.810852       0.000000       0.267026       0.225000       0.126400       0.205300       0.283000
54305     54305     neimenggu      115.2786       41.8883           72       181     2012      08        22        235              0.111750      13.874878       0.000000       0.256416       0.201000       0.041300       0.230100   -9999.000000
54305     54305     neimenggu      115.2786       41.8883           72       181     2012      08        23        236              0.110083      16.356140       0.000000       0.250169       0.199000       0.082100       0.221500       0.235000
54305     54305     neimenggu      115.2786       41.8883           72       181     2012      08        24        237              0.106833      19.395721       0.000000       0.244084       0.183000   -9999.000000       0.231700       0.330000
54305     54305     neimenggu      115.2786       41.8883           72       181     2012      08        25        238              0.000000      19.994110       0.157815       0.238537       0.213500   -9999.000000       0.234600       0.399000
54305     54305     neimenggu      115.2786       41.8883           72       181     2012      08        26        239              0.100833      21.005768       0.526320       0.235535       0.232000       0.089500       0.227400       0.360000
54305     54305     neimenggu      115.2786       41.8883           72       181     2012      08        27        240              0.105792      21.070435       4.931753       0.235212       0.214000       0.024000       0.188200       0.442000
54305     54305     neimenggu      115.2786       41.8883           72       181     2012      08        28        241              0.120292      20.537292       0.232631       0.253022       0.221500       0.184000       0.194800   -9999.000000
54305     54305     neimenggu      115.2786       41.8883           72       181     2012      08        29        242              0.122667      21.018646       0.000000       0.244713       0.217000       0.052200       0.202300       0.312000
54305     54305     neimenggu      115.2786       41.8883           72       181     2012      08        30        243              0.120500      21.168030       0.000000       0.234968       0.197500       0.251500       0.208600       0.344000
54305     54305     neimenggu      115.2786       41.8883           72       181     2012      08        31        244              0.115292      22.673920       0.743270       0.228489       0.220000   -9999.000000       0.191500       0.298000
54305     54305     neimenggu      115.2786       41.8883           72       181     2012      09        01        245              0.141625      21.365936      53.257957       0.226230   -9999.000000       0.018500       0.225900       0.983000
54305     54305     neimenggu      115.2786       41.8883           72       181     2012      09        02        246              0.169625      16.163025       0.272344       0.311265       0.335500       0.460200       0.430100   -9999.000000
54305     54305     neimenggu      115.2786       41.8883           72       181     2012      09        03        247              0.155000      12.881470       0.027335       0.311281       0.345000       0.222700       0.237900       0.769000
54305     54305     neimenggu      115.2786       41.8883           72       181     2012      09        04        248              0.150125      10.768707       0.000000       0.292914       0.273000       0.393600       0.244800       0.534000
54305     54305     neimenggu      115.2786       41.8883           72       181     2012      09        05        249              0.147333      12.931732       0.000000       0.282829       0.257000   -9999.000000   -9999.000000       0.687000
54305     54305     neimenggu      115.2786       41.8883           72       181     2012      09        06        250              0.146208      15.522827       0.000000       0.275463       0.214000       0.383800       0.187000       0.367000
54305     54305     neimenggu      115.2786       41.8883           72       181     2012      09        07        251              0.144500      16.971558       0.000000       0.269499       0.189500   -9999.000000       0.181300   -9999.000000
54305     54305     neimenggu      115.2786       41.8883           72       181     2012      09        08        252              0.142083      17.178375       0.000000       0.264852       0.181000       0.128600       0.185600       0.397000
54305     54305     neimenggu      115.2786       41.8883           72       181     2012      09        09        253              0.139500      17.794342       0.000000       0.260169       0.179000       0.150800       0.176800       0.292000
54305     54305     neimenggu      115.2786       41.8883           72       181     2012      09        10        254              0.135625      18.924316       0.612180       0.255487       0.197500       0.130200       0.157900       0.296000
54305     54305     neimenggu      115.2786       41.8883           72       181     2012      09        11        255              0.130833      17.878540       3.078228       0.254500       0.218000       0.118400       0.188600       0.652000
54305     54305     neimenggu      115.2786       41.8883           72       181     2012      09        12        256              0.127917      13.777771       0.455667       0.266409       0.174000   -9999.000000       0.156400       0.656000
54305     54305     neimenggu      115.2786       41.8883           72       181     2012      09        13        257              0.126292      10.787476       0.148932       0.265616       0.210000       0.141900       0.159300       0.582000
54305     54305     neimenggu      115.2786       41.8883           72       181     2012      09        14        258              0.125625      10.673157       0.000000       0.262861       0.155000       0.192000       0.133300       0.317000
54305     54305     neimenggu      115.2786       41.8883           72       181     2012      09        15        259              0.124083      12.219238       0.000000       0.257209       0.169000       0.216700       0.135100       0.293000
54305     54305     neimenggu      115.2786       41.8883           72       181     2012      09        16        260              0.120500      13.406097       0.000000       0.253284       0.161000       0.150100       0.137100       0.255000
54305     54305     neimenggu      115.2786       41.8883           72       181     2012      09        17        261              0.118958      13.714844       0.000000       0.250359       0.159000       0.332000       0.139500       0.274000
54305     54305     neimenggu      115.2786       41.8883           72       181     2012      09        18        262              0.115750      13.931946       0.000000       0.246850       0.152000   -9999.000000       0.143000       0.188000
54305     54305     neimenggu      115.2786       41.8883           72       181     2012      09        19        263              0.112083      13.867493       0.000000       0.244369       0.152000       0.094700       0.141900       0.255000
54305     54305     neimenggu      115.2786       41.8883           72       181     2012      09        20        264              0.109375      14.224060       0.038585       0.242514       0.141000       0.171000       0.153600       0.316000
54305     54305     neimenggu      115.2786       41.8883           72       181     2012      09        21        265              0.109000      15.328125       2.509234       0.241295   -9999.000000       0.052400       0.178600       0.699000
54305     54305     neimenggu      115.2786       41.8883           72       181     2012      09        22        266              0.108167      14.716919       0.261403       0.255993       0.146000   -9999.000000       0.164100       0.645000
54305     54305     neimenggu      115.2786       41.8883           72       181     2012      09        23        267              0.106417      15.376099       0.052225       0.252963       0.137500   -9999.000000       0.155500       0.255000
54305     54305     neimenggu      115.2786       41.8883           72       181     2012      09        24        268              0.104958      15.876343       8.587692       0.247561       0.145500   -9999.000000       0.136500       0.283000
54305     54305     neimenggu      115.2786       41.8883           72       181     2012      09        25        269              0.146958      15.489258       5.677273       0.259709       0.265000   -9999.000000       0.188000       0.674000
54305     54305     neimenggu      115.2786       41.8883           72       181     2012      09        26        270              0.151792      11.341278       7.033059       0.294944       0.189000       0.189100       0.194000   -9999.000000
54305     54305     neimenggu      115.2786       41.8883           72       181     2012      09        27        271              0.166000      12.686829       2.312090       0.286048   -9999.000000   -9999.000000       0.206500       0.705000
54305     54305     neimenggu      115.2786       41.8883           72       181     2012      09        28        272              0.146867       7.921417       0.095146       0.291478   -9999.000000   -9999.000000       0.200400       0.431000
54305     54305     neimenggu      115.2786       41.8883           72       181     2012      09        29        273              0.143708       7.907593       0.000000       0.277203       0.171000   -9999.000000       0.161600       0.522000
54305     54305     neimenggu      115.2786       41.8883           72       181     2012      09        30        274              0.141042       8.728088       0.000000       0.270503       0.158000       0.235700       0.150500       0.285000
54305     54305     neimenggu      115.2786       41.8883           72       181     2012      10        01        275              0.139250      10.318054       0.000000       0.266059       0.114000       0.031000       0.130600   -9999.000000
54305     54305     neimenggu      115.2786       41.8883           72       181     2012      10        02        276              0.136333      12.200592       1.222160       0.262090       0.133500       0.255500       0.136600       0.345000
54305     54305     neimenggu      115.2786       41.8883           72       181     2012      10        03        277              0.133833      11.126343       0.000000       0.259152       0.130000       0.053300       0.135000       0.171000
54305     54305     neimenggu      115.2786       41.8883           72       181     2012      10        04        278              0.132083       9.331207       0.000000       0.257771       0.118000       0.130200       0.123300       0.267000
54305     54305     neimenggu      115.2786       41.8883           72       181     2012      10        05        279              0.131000      10.090485       0.000000       0.255761       0.125000       0.192200       0.123100       0.213000
54305     54305     neimenggu      115.2786       41.8883           72       181     2012      10        06        280              0.129333       9.811371       0.000000       0.254075       0.120000       0.092600       0.124400   -9999.000000
54305     54305     neimenggu      115.2786       41.8883           72       181     2012      10        07        281              0.127833      10.321014       0.000000       0.252254       0.124000       0.059000       0.129100       0.240000
54305     54305     neimenggu      115.2786       41.8883           72       181     2012      10        08        282              0.127500      11.832794       4.952538       0.251099       0.136000       0.105000       0.123900       0.211000
54305     54305     neimenggu      115.2786       41.8883           72       181     2012      10        09        283              0.123000      12.667084       0.266957       0.262728   -9999.000000       0.088200       0.124100       0.311000
54305     54305     neimenggu      115.2786       41.8883           72       181     2012      10        10        284              0.121167       5.026001       8.445881       0.269989       0.132000   -9999.000000       0.109100       0.169000
54305     54305     neimenggu      115.2786       41.8883           72       181     2012      10        11        285              0.121625       7.032257       0.000000       0.262381       0.110000   -9999.000000       0.108300       0.146000
54305     54305     neimenggu      115.2786       41.8883           72       181     2012      10        12        286              0.120583       8.606934       0.143142       0.258515       0.096000       0.109200       0.115100       0.241000
54305     54305     neimenggu      115.2786       41.8883           72       181     2012      10        13        287              0.116667       7.315002       0.000000       0.245348   -9999.000000       0.183400       0.119000       0.072000
54305     54305     neimenggu      115.2786       41.8883           72       181     2012      10        14        288              0.116833       3.159943       0.000000       0.222748       0.116000       0.089200       0.121200       0.222000
54305     54305     neimenggu      115.2786       41.8883           72       181     2012      10        15        289              0.116833       4.773010       3.396754       0.246690       0.132000   -9999.000000       0.098300       0.192000
54305     54305     neimenggu      115.2786       41.8883           72       181     2012      10        16        290              0.123792       7.777008       0.529190       0.258200   -9999.000000   -9999.000000       0.121800       0.759000
54305     54305     neimenggu      115.2786       41.8883           72       181     2012      10        17        291              0.130083       1.452576       0.000000       0.216081   -9999.000000       0.062800       0.144400       0.329000
54305     54305     neimenggu      115.2786       41.8883           72       181     2012      10        18        292              0.131250       1.960938       0.000000       0.222673       0.152000   -9999.000000       0.099000       0.237000
54305     54305     neimenggu      115.2786       41.8883           72       181     2012      10        19        293              0.129333       3.856537       0.000000       0.246800   -9999.000000   -9999.000000       0.101600       0.306000
54305     54305     neimenggu      115.2786       41.8883           72       181     2012      10        20        294              0.128375       5.806183       0.557476       0.255610       0.121000   -9999.000000   -9999.000000       0.291000
54305     54305     neimenggu      115.2786       41.8883           72       181     2012      10        21        295              0.151958       5.691528      22.180256       0.256354   -9999.000000   -9999.000000       0.102000       0.632000
54305     54305     neimenggu      115.2786       41.8883           72       181     2012      10        22        296              0.152583       4.467865       1.615739       0.300620   -9999.000000   -9999.000000       0.158700       0.527000
54305     54305     neimenggu      115.2786       41.8883           72       181     2012      10        23        297              0.147625       2.701630       2.005238       0.305553   -9999.000000   -9999.000000       0.101500       0.489000
54305     54305     neimenggu      115.2786       41.8883           72       181     2012      10        24        298              0.144583       5.478394       0.000000       0.291944   -9999.000000       0.104900       0.088400       0.328000
54305     54305     neimenggu      115.2786       41.8883           72       181     2012      10        25        299              0.000000       5.660614       0.196449       0.280560   -9999.000000   -9999.000000       0.093300   -9999.000000
54305     54305     neimenggu      115.2786       41.8883           72       181     2012      10        26        300              0.140125       7.018829       0.077619       0.277083       0.120500   -9999.000000       0.097200       0.446000
54305     54305     neimenggu      115.2786       41.8883           72       181     2012      10        27        301              0.137875       7.092407       0.000000       0.274913       0.111000       0.171400       0.088400       0.283000
54305     54305     neimenggu      115.2786       41.8883           72       181     2012      10        28        302              0.000000       3.375427       0.000000       0.235941       0.108000       0.175800       0.091000       0.296000
54305     54305     neimenggu      115.2786       41.8883           72       181     2012      10        29        303              0.131875       3.616547       0.483467       0.257321   -9999.000000   -9999.000000       0.073600       0.235000
54305     54305     neimenggu      115.2786       41.8883           72       181     2012      10        30        304              0.122000       0.757660       0.148441       0.200517   -9999.000000       0.131200       0.073600   -9999.000000
54305     54305     neimenggu      115.2786       41.8883           72       181     2012      10        31        305              0.115292      -0.368500       0.000000       0.168762       0.096000   -9999.000000       0.077200       0.210000
54305     54305     neimenggu      115.2786       41.8883           72       181     2012      11        01        306              0.121750      -0.183167       0.000000       0.167828       0.101000       0.109300       0.072800       0.194000
54305     54305     neimenggu      115.2786       41.8883           72       181     2012      11        02        307              0.127917       0.915283       0.000000       0.193029       0.098000   -9999.000000       0.072800       0.220000
54305     54305     neimenggu      115.2786       41.8883           72       181     2012      11        03        308              0.129417       3.326355       0.749781       0.247883   -9999.000000   -9999.000000       0.070000       0.195000
54305     54305     neimenggu      115.2786       41.8883           72       181     2012      11        04        309              0.128000      -1.336945       0.591172       0.173919   -9999.000000   -9999.000000       0.073800   -9999.000000
54305     54305     neimenggu      115.2786       41.8883           72       181     2012      11        05        310              0.127250      -5.071381       0.000000       0.102292   -9999.000000       0.179700       0.062000       0.142000
54305     54305     neimenggu      115.2786       41.8883           72       181     2012      11        06        311              0.127667      -4.522156       0.586535       0.101804   -9999.000000       0.093300   -9999.000000       0.183000
54305     54305     neimenggu      115.2786       41.8883           72       181     2012      11        07        312              0.125708      -2.957153       0.173540       0.114721   -9999.000000   -9999.000000       0.059300       0.186000
54305     54305     neimenggu      115.2786       41.8883           72       181     2012      11        08        313              0.122042      -3.742798       0.000000       0.117593   -9999.000000   -9999.000000   -9999.000000       0.204000
54305     54305     neimenggu      115.2786       41.8883           72       181     2012      11        09        314              0.117542      -2.607849       0.199606       0.118778   -9999.000000   -9999.000000       0.061300       0.238000
54305     54305     neimenggu      115.2786       41.8883           72       181     2012      11        10        315              0.123250      -0.831665       0.538784       0.140712   -9999.000000   -9999.000000       0.060000       0.242000
54305     54305     neimenggu      115.2786       41.8883           72       181     2012      11        11        316              0.122583      -4.829956       0.000000       0.110779   -9999.000000   -9999.000000       0.060700       0.179000
54305     54305     neimenggu      115.2786       41.8883           72       181     2012      11        12        317              0.117958      -8.654175       0.000000       0.095634   -9999.000000       0.102900       0.049100       0.156000
54305     54305     neimenggu      115.2786       41.8883           72       181     2012      11        13        318              0.000000      -8.341492       0.000000       0.093506   -9999.000000       0.131400       0.047300       0.192000
54305     54305     neimenggu      115.2786       41.8883           72       181     2012      11        14        319              0.097667     -10.679718       0.000000       0.092177   -9999.000000       0.102300       0.049000       0.187000
54305     54305     neimenggu      115.2786       41.8883           72       181     2012      11        15        320              0.092917      -9.285034       1.621227       0.090622   -9999.000000   -9999.000000       0.045600       0.171000
54305     54305     neimenggu      115.2786       41.8883           72       181     2012      11        16        321              0.095583      -5.539154       0.000000       0.094197   -9999.000000   -9999.000000       0.045100       0.109000
54305     54305     neimenggu      115.2786       41.8883           72       181     2012      11        17        322              0.000000      -7.401611       0.000000       0.092067   -9999.000000       0.131500       0.049500       0.159000
54305     54305     neimenggu      115.2786       41.8883           72       181     2012      11        18        323              0.093083      -7.407318       0.000000       0.091441   -9999.000000   -9999.000000       0.048700       0.216000
54305     54305     neimenggu      115.2786       41.8883           72       181     2012      11        19        324              0.087875      -7.132019       0.000000       0.091655   -9999.000000       0.084200       0.046400       0.168000
54305     54305     neimenggu      115.2786       41.8883           72       181     2012      11        20        325              0.084000      -7.874603       0.000000       0.090975   -9999.000000   -9999.000000       0.045000       0.135000
54305     54305     neimenggu      115.2786       41.8883           72       181     2012      11        21        326              0.083000      -5.908661       0.000000       0.091780   -9999.000000       0.016900       0.039600       0.107000
54305     54305     neimenggu      115.2786       41.8883           72       181     2012      11        22        327              0.082667      -5.600342       0.000000       0.094025   -9999.000000   -9999.000000       0.035600       0.195000
54305     54305     neimenggu      115.2786       41.8883           72       181     2012      11        23        328              0.079875     -10.248474       0.000000       0.090402   -9999.000000       0.119500       0.032300   -9999.000000
54305     54305     neimenggu      115.2786       41.8883           72       181     2012      11        24        329              0.078750     -10.040924       0.000000       0.089881   -9999.000000       0.053100       0.033600       0.197000
54305     54305     neimenggu      115.2786       41.8883           72       181     2012      11        25        330              0.078500      -7.765564       0.000000       0.090715   -9999.000000   -9999.000000       0.037600       0.160000
54305     54305     neimenggu      115.2786       41.8883           72       181     2012      11        26        331              0.075792     -10.178955       0.000000       0.090177   -9999.000000   -9999.000000   -9999.000000       0.154000
54305     54305     neimenggu      115.2786       41.8883           72       181     2012      11        27        332              0.075625      -9.365143       0.000000       0.090026   -9999.000000   -9999.000000       0.038100       0.222000
54305     54305     neimenggu      115.2786       41.8883           72       181     2012      11        28        333              0.075000      -8.771942       0.000000       0.090118   -9999.000000       0.161100       0.037600   -9999.000000
54305     54305     neimenggu      115.2786       41.8883           72       181     2012      11        29        334              0.072833     -12.306976       0.000000       0.088905   -9999.000000   -9999.000000       0.033400       0.156000
54305     54305     neimenggu      115.2786       41.8883           72       181     2012      11        30        335              0.070125     -14.570526       0.000000       0.087555   -9999.000000   -9999.000000       0.030700       0.151000
54305     54305     neimenggu      115.2786       41.8883           72       181     2012      12        01        336              0.070000     -15.377319       0.065665       0.085990   -9999.000000   -9999.000000       0.035400       0.119000
54305     54305     neimenggu      115.2786       41.8883           72       181     2012      12        02        337              0.070667     -10.895172       0.183023       0.086899   -9999.000000   -9999.000000       0.031400       0.175000
54305     54305     neimenggu      115.2786       41.8883           72       181     2012      12        03        338              0.070833      -9.541626       0.000000       0.087604   -9999.000000   -9999.000000       0.033100   -9999.000000
54305     54305     neimenggu      115.2786       41.8883           72       181     2012      12        04        339              0.070000     -14.054657       0.000000       0.086576   -9999.000000   -9999.000000       0.033800       0.103000
54305     54305     neimenggu      115.2786       41.8883           72       181     2012      12        05        340              0.070000     -14.207977       0.000000       0.086122   -9999.000000   -9999.000000       0.027900       0.143000
54305     54305     neimenggu      115.2786       41.8883           72       181     2012      12        06        341              0.069667     -17.799347       0.000000       0.085436   -9999.000000   -9999.000000       0.032000       0.097000
54305     54305     neimenggu      115.2786       41.8883           72       181     2012      12        07        342              0.068000     -16.576569       0.000000       0.085264   -9999.000000   -9999.000000       0.031100       0.126000
54305     54305     neimenggu      115.2786       41.8883           72       181     2012      12        08        343              0.066167     -19.271103       0.000000       0.084487   -9999.000000   -9999.000000       0.030300       0.083000
54305     54305     neimenggu      115.2786       41.8883           72       181     2012      12        09        344              0.066000     -21.085449       0.000000       0.083287   -9999.000000   -9999.000000       0.033100       0.090000
54305     54305     neimenggu      115.2786       41.8883           72       181     2012      12        10        345              0.066000     -17.541092       0.000000       0.083863   -9999.000000   -9999.000000       0.022000       0.068000
54305     54305     neimenggu      115.2786       41.8883           72       181     2012      12        11        346              0.066000     -15.932190       0.000000       0.084236   -9999.000000   -9999.000000       0.018700       0.082000
54305     54305     neimenggu      115.2786       41.8883           72       181     2012      12        12        347              0.066000     -14.665802       0.000000       0.083938   -9999.000000   -9999.000000       0.023400       0.111000
54305     54305     neimenggu      115.2786       41.8883           72       181     2012      12        13        348              0.066000     -12.003143       0.227753       0.084734   -9999.000000   -9999.000000       0.024700       0.131000
54305     54305     neimenggu      115.2786       41.8883           72       181     2012      12        14        349              0.067750     -10.283997       0.000000       0.085457   -9999.000000   -9999.000000       0.023500       0.078000
54305     54305     neimenggu      115.2786       41.8883           72       181     2012      12        15        350              0.000000      -7.757812       0.000000       0.085858   -9999.000000   -9999.000000       0.024400       0.077000
54305     54305     neimenggu      115.2786       41.8883           72       181     2012      12        16        351              0.068000     -10.260956       0.000000       0.086006   -9999.000000   -9999.000000       0.016900       0.113000
54305     54305     neimenggu      115.2786       41.8883           72       181     2012      12        17        352              0.068000     -12.567047       0.000000       0.085488   -9999.000000   -9999.000000       0.019700       0.081000
54305     54305     neimenggu      115.2786       41.8883           72       181     2012      12        18        353              0.067083     -17.593399       0.000000       0.084159   -9999.000000   -9999.000000       0.020000       0.068000
54305     54305     neimenggu      115.2786       41.8883           72       181     2012      12        19        354              0.066583     -16.588745       0.000000       0.084093   -9999.000000   -9999.000000       0.016800       0.062000
54305     54305     neimenggu      115.2786       41.8883           72       181     2012      12        20        355              0.000000     -13.528290       0.377541       0.084676   -9999.000000   -9999.000000       0.018300       0.010000
54305     54305     neimenggu      115.2786       41.8883           72       181     2012      12        21        356              0.068000     -12.303619       0.000000       0.084956   -9999.000000   -9999.000000   -9999.000000       0.117000
54305     54305     neimenggu      115.2786       41.8883           72       181     2012      12        22        357              0.067667     -17.217514       0.000000       0.084207   -9999.000000   -9999.000000       0.015500   -9999.000000
54305     54305     neimenggu      115.2786       41.8883           72       181     2012      12        23        358              0.066000     -20.766891       0.000000       0.083235   -9999.000000   -9999.000000   -9999.000000       0.094000
54305     54305     neimenggu      115.2786       41.8883           72       181     2012      12        24        359              0.065800     -21.850006       0.000000       0.082052   -9999.000000   -9999.000000       0.024100       0.084000
54305     54305     neimenggu      115.2786       41.8883           72       181     2012      12        25        360              0.065000     -22.059402       0.000000       0.082200   -9999.000000   -9999.000000       0.022100       0.061000
54305     54305     neimenggu      115.2786       41.8883           72       181     2012      12        26        361              0.000000     -20.756683       0.000000       0.082113   -9999.000000   -9999.000000       0.025300       0.165000
54305     54305     neimenggu      115.2786       41.8883           72       181     2012      12        27        362              0.065000     -17.295990       0.000000       0.082469   -9999.000000   -9999.000000       0.018600   -9999.000000
54305     54305     neimenggu      115.2786       41.8883           72       181     2012      12        28        363              0.000000     -14.764435       0.522712       0.082811   -9999.000000   -9999.000000       0.015700       0.117000
54305     54305     neimenggu      115.2786       41.8883           72       181     2012      12        29        364              0.000000     -15.199799       0.000000       0.083069   -9999.000000   -9999.000000   -9999.000000   -9999.000000
54305     54305     neimenggu      115.2786       41.8883           72       181     2012      12        30        365              0.000000     -18.587662       0.000000       0.083106   -9999.000000   -9999.000000       0.019500       0.092000
54305     54305     neimenggu      115.2786       41.8883           72       181     2012      12        31        366              0.065000     -18.817322       0.000000       0.082951   -9999.000000   -9999.000000       0.015200   -9999.000000
