# Supplementary material for: Research on Fusing Multisatellite Soil Moisture Data Based on Bayesian Model Averaging
Source: Hindawi journal article supplement (doi:10.1155/2018/9310838), 2018-06-25
Supplement: f1 [file 9310838.f1.zip › 2012_sm00-10cm_daily_ZDB_ZHY_54311_366days_allin.txt]

54311     54311     hebei          117.7658       41.9606           72       191     2012      01        01        001              0.000000   -9999.000000       0.000000   -9999.000000   -9999.000000   -9999.000000       0.044300   -9999.000000
54311     54311     hebei          117.7658       41.9606           72       191     2012      01        02        002              0.007667     -13.098785       0.000000       0.095231   -9999.000000   -9999.000000       0.039800       0.036000
54311     54311     hebei          117.7658       41.9606           72       191     2012      01        03        003              0.000000     -14.268524       0.000000       0.095149   -9999.000000   -9999.000000       0.043100   -9999.000000
54311     54311     hebei          117.7658       41.9606           72       191     2012      01        04        004              0.007250     -15.123413       0.000000       0.094787   -9999.000000   -9999.000000       0.042100       0.057000
54311     54311     hebei          117.7658       41.9606           72       191     2012      01        05        005              0.007500     -13.784271       0.000000       0.094744   -9999.000000   -9999.000000       0.043100   -9999.000000
54311     54311     hebei          117.7658       41.9606           72       191     2012      01        06        006              0.007083     -13.079376       0.000000       0.094556   -9999.000000   -9999.000000       0.045100       0.026000
54311     54311     hebei          117.7658       41.9606           72       191     2012      01        07        007              0.007333     -14.313110       0.000000       0.093714   -9999.000000   -9999.000000       0.040500       0.046000
54311     54311     hebei          117.7658       41.9606           72       191     2012      01        08        008              0.000000     -13.557556       0.000000       0.093842   -9999.000000   -9999.000000       0.040200   -9999.000000
54311     54311     hebei          117.7658       41.9606           72       191     2012      01        09        009              0.007583     -13.154144       0.000000       0.094075   -9999.000000   -9999.000000       0.040500       0.012000
54311     54311     hebei          117.7658       41.9606           72       191     2012      01        10        010              0.007167     -12.483337       0.000000       0.093783   -9999.000000   -9999.000000       0.042300       0.008000
54311     54311     hebei          117.7658       41.9606           72       191     2012      01        11        011              0.007250     -15.551849       0.000000       0.093117   -9999.000000   -9999.000000       0.044200       0.007000
54311     54311     hebei          117.7658       41.9606           72       191     2012      01        12        012              0.007417     -13.733002       0.000000       0.093153   -9999.000000   -9999.000000       0.045900       0.004000
54311     54311     hebei          117.7658       41.9606           72       191     2012      01        13        013              0.008000     -12.784363       0.000000       0.093332   -9999.000000   -9999.000000       0.039800       0.022000
54311     54311     hebei          117.7658       41.9606           72       191     2012      01        14        014              0.008000     -11.751923       0.000000       0.093450   -9999.000000   -9999.000000       0.038300   -9999.000000
54311     54311     hebei          117.7658       41.9606           72       191     2012      01        15        015              0.008000     -12.642120       0.000000       0.093133   -9999.000000   -9999.000000       0.040800       0.023000
54311     54311     hebei          117.7658       41.9606           72       191     2012      01        16        016              0.008522     -10.751984       0.000000       0.093306   -9999.000000   -9999.000000       0.042000   -9999.000000
54311     54311     hebei          117.7658       41.9606           72       191     2012      01        17        017              0.000000      -9.700592       0.000000       0.093807   -9999.000000   -9999.000000       0.037800       0.036000
54311     54311     hebei          117.7658       41.9606           72       191     2012      01        18        018              0.008333     -11.590698       0.000000       0.093621   -9999.000000   -9999.000000       0.044800       0.079000
54311     54311     hebei          117.7658       41.9606           72       191     2012      01        19        019              0.008417     -11.118591       0.000000       0.093135   -9999.000000   -9999.000000       0.038600   -9999.000000
54311     54311     hebei          117.7658       41.9606           72       191     2012      01        20        020              0.007500     -11.132050       0.000000       0.093108   -9999.000000   -9999.000000       0.037100       0.023000
54311     54311     hebei          117.7658       41.9606           72       191     2012      01        21        021              0.006750     -16.131866       0.000000       0.091867   -9999.000000   -9999.000000       0.037300   -9999.000000
54311     54311     hebei          117.7658       41.9606           72       191     2012      01        22        022              0.006667     -18.720093       0.000000       0.091167   -9999.000000   -9999.000000       0.042900       0.026000
54311     54311     hebei          117.7658       41.9606           72       191     2012      01        23        023              0.006750     -18.724304       0.000000       0.091128   -9999.000000   -9999.000000       0.045500       0.070000
54311     54311     hebei          117.7658       41.9606           72       191     2012      01        24        024              0.006667     -17.131348       0.000000       0.091516   -9999.000000   -9999.000000   -9999.000000   -9999.000000
54311     54311     hebei          117.7658       41.9606           72       191     2012      01        25        025              0.006917     -18.218613       0.000000       0.091446   -9999.000000   -9999.000000       0.041300       0.014000
54311     54311     hebei          117.7658       41.9606           72       191     2012      01        26        026              0.007083     -15.425446       0.000000       0.091493   -9999.000000   -9999.000000       0.043100   -9999.000000
54311     54311     hebei          117.7658       41.9606           72       191     2012      01        27        027              0.007167     -14.688263       0.000000       0.091548   -9999.000000   -9999.000000       0.044200   -9999.000000
54311     54311     hebei          117.7658       41.9606           72       191     2012      01        28        028              0.007083     -14.525879       0.000000       0.091409   -9999.000000   -9999.000000       0.044300       0.039000
54311     54311     hebei          117.7658       41.9606           72       191     2012      01        29        029              0.006917     -14.662354       0.000000       0.091491   -9999.000000   -9999.000000       0.045200   -9999.000000
54311     54311     hebei          117.7658       41.9606           72       191     2012      01        30        030              0.007000     -17.456512       0.000000       0.090888   -9999.000000   -9999.000000       0.041900       0.023000
54311     54311     hebei          117.7658       41.9606           72       191     2012      01        31        031              0.006833     -14.790405       0.000000       0.090924   -9999.000000   -9999.000000       0.039700       0.022000
54311     54311     hebei          117.7658       41.9606           72       191     2012      02        01        032              0.006667     -17.840576       0.000000       0.090726   -9999.000000   -9999.000000   -9999.000000       0.029000
54311     54311     hebei          117.7658       41.9606           72       191     2012      02        02        033              0.006750     -18.528442       0.000000       0.090661   -9999.000000   -9999.000000       0.046100       0.068000
54311     54311     hebei          117.7658       41.9606           72       191     2012      02        03        034              0.007167     -16.361816       0.228552       0.091192   -9999.000000   -9999.000000       0.045100       0.027000
54311     54311     hebei          117.7658       41.9606           72       191     2012      02        04        035              0.007583     -15.088165       0.000000       0.091909   -9999.000000   -9999.000000   -9999.000000       0.034000
54311     54311     hebei          117.7658       41.9606           72       191     2012      02        05        036              0.008333     -13.666412       0.000000       0.093247   -9999.000000   -9999.000000       0.041900       0.005000
54311     54311     hebei          117.7658       41.9606           72       191     2012      02        06        037              0.007083     -11.241486       0.000000       0.093275   -9999.000000   -9999.000000       0.041700   -9999.000000
54311     54311     hebei          117.7658       41.9606           72       191     2012      02        07        038              0.006833     -17.555634       0.000000       0.091632   -9999.000000   -9999.000000       0.042000       0.065000
54311     54311     hebei          117.7658       41.9606           72       191     2012      02        08        039              0.007000     -16.643921       0.000000       0.091537   -9999.000000   -9999.000000       0.048100       0.025000
54311     54311     hebei          117.7658       41.9606           72       191     2012      02        09        040              0.007417     -14.834717       0.000000       0.092079   -9999.000000   -9999.000000       0.041900       0.027000
54311     54311     hebei          117.7658       41.9606           72       191     2012      02        10        041              0.007833     -12.488892       0.000000       0.092159   -9999.000000   -9999.000000       0.042600       0.002000
54311     54311     hebei          117.7658       41.9606           72       191     2012      02        11        042              0.007833     -12.572876       0.000000       0.091656   -9999.000000   -9999.000000       0.041000       0.062000
54311     54311     hebei          117.7658       41.9606           72       191     2012      02        12        043              0.008167     -12.542908       0.000000       0.091472   -9999.000000   -9999.000000       0.045100       0.028000
54311     54311     hebei          117.7658       41.9606           72       191     2012      02        13        044              0.009125      -9.771057       0.000000       0.092791   -9999.000000   -9999.000000   -9999.000000       0.010000
54311     54311     hebei          117.7658       41.9606           72       191     2012      02        14        045              0.008417      -6.543854       0.000000       0.110836   -9999.000000   -9999.000000       0.045700   -9999.000000
54311     54311     hebei          117.7658       41.9606           72       191     2012      02        15        046              0.008167     -12.536072       0.000000       0.096068   -9999.000000   -9999.000000       0.047300       0.019000
54311     54311     hebei          117.7658       41.9606           72       191     2012      02        16        047              0.007417     -11.608276       0.000000       0.094121   -9999.000000   -9999.000000       0.041000       0.073000
54311     54311     hebei          117.7658       41.9606           72       191     2012      02        17        048              0.007333     -13.283905       0.000000       0.094136   -9999.000000   -9999.000000       0.041700   -9999.000000
54311     54311     hebei          117.7658       41.9606           72       191     2012      02        18        049              0.008083     -13.736816       0.000000       0.094173   -9999.000000   -9999.000000   -9999.000000       0.001000
54311     54311     hebei          117.7658       41.9606           72       191     2012      02        19        050              0.008958     -11.512024       0.000000       0.094424   -9999.000000   -9999.000000       0.044500   -9999.000000
54311     54311     hebei          117.7658       41.9606           72       191     2012      02        20        051              0.009583      -8.767731       0.000000       0.104787   -9999.000000   -9999.000000       0.038800       0.021000
54311     54311     hebei          117.7658       41.9606           72       191     2012      02        21        052              0.010042      -6.961273       0.000000       0.118347   -9999.000000   -9999.000000   -9999.000000       0.127000
54311     54311     hebei          117.7658       41.9606           72       191     2012      02        22        053              0.009417      -4.785400       0.000000       0.123059   -9999.000000   -9999.000000       0.043300   -9999.000000
54311     54311     hebei          117.7658       41.9606           72       191     2012      02        23        054              0.010042      -6.826324       0.000000       0.119912   -9999.000000   -9999.000000       0.040700       0.105000
54311     54311     hebei          117.7658       41.9606           72       191     2012      02        24        055              0.010087      -5.476074       0.000000       0.116886   -9999.000000   -9999.000000       0.034900       0.003000
54311     54311     hebei          117.7658       41.9606           72       191     2012      02        25        056              0.009500      -7.164337       0.000000       0.117940   -9999.000000   -9999.000000       0.042200       0.032000
54311     54311     hebei          117.7658       41.9606           72       191     2012      02        26        057              0.009500      -9.126831       0.000000       0.101967   -9999.000000   -9999.000000       0.042500       0.038000
54311     54311     hebei          117.7658       41.9606           72       191     2012      02        27        058              0.010292      -8.843262       0.000000       0.107084   -9999.000000   -9999.000000   -9999.000000   -9999.000000
54311     54311     hebei          117.7658       41.9606           72       191     2012      02        28        059              0.010833      -6.136200       0.000000       0.120841   -9999.000000   -9999.000000       0.044700       0.044000
54311     54311     hebei          117.7658       41.9606           72       191     2012      02        29        060              0.000000   -9999.000000       0.000000   -9999.000000   -9999.000000   -9999.000000   -9999.000000   -9999.000000
54311     54311     hebei          117.7658       41.9606           72       191     2012      03        01        061              0.014000      -3.408417       0.000000       0.133925   -9999.000000   -9999.000000       0.041500       0.051000
54311     54311     hebei          117.7658       41.9606           72       191     2012      03        02        062              0.017083      -3.910461       0.000000       0.135867   -9999.000000   -9999.000000       0.045100       0.037000
54311     54311     hebei          117.7658       41.9606           72       191     2012      03        03        063              0.013833      -3.644531       0.000000       0.139255   -9999.000000   -9999.000000       0.043000   -9999.000000
54311     54311     hebei          117.7658       41.9606           72       191     2012      03        04        064              0.014583      -3.407806       0.000000       0.128246   -9999.000000   -9999.000000       0.046300       0.021000
54311     54311     hebei          117.7658       41.9606           72       191     2012      03        05        065              0.013375      -1.868927       0.000000       0.148298   -9999.000000   -9999.000000       0.039700       0.006000
54311     54311     hebei          117.7658       41.9606           72       191     2012      03        06        066              0.013292      -2.911102       0.000000       0.138107   -9999.000000   -9999.000000       0.038300       0.090000
54311     54311     hebei          117.7658       41.9606           72       191     2012      03        07        067              0.000000      -3.510773       0.000000       0.132607   -9999.000000   -9999.000000       0.039800       0.041000
54311     54311     hebei          117.7658       41.9606           72       191     2012      03        08        068              0.011087      -6.880859       0.000000       0.119712   -9999.000000   -9999.000000       0.034900       0.077000
54311     54311     hebei          117.7658       41.9606           72       191     2012      03        09        069              0.014208      -8.301331       0.000000       0.107474   -9999.000000   -9999.000000   -9999.000000       0.107000
54311     54311     hebei          117.7658       41.9606           72       191     2012      03        10        070              0.011500      -3.693237       0.000000       0.135293   -9999.000000   -9999.000000       0.035300       0.010000
54311     54311     hebei          117.7658       41.9606           72       191     2012      03        11        071              0.010792     -10.208038       0.000000       0.101111   -9999.000000   -9999.000000       0.036600       0.062000
54311     54311     hebei          117.7658       41.9606           72       191     2012      03        12        072              0.014208      -7.712006       0.000000       0.104049   -9999.000000   -9999.000000       0.034900       0.005000
54311     54311     hebei          117.7658       41.9606           72       191     2012      03        13        073              0.019667      -4.652161       0.000000       0.134265   -9999.000000   -9999.000000       0.040000       0.199000
54311     54311     hebei          117.7658       41.9606           72       191     2012      03        14        074              0.027083      -2.744659       0.000000       0.151478       0.107000   -9999.000000       0.036400       0.058000
54311     54311     hebei          117.7658       41.9606           72       191     2012      03        15        075              0.037500      -1.066376       0.121022       0.160203   -9999.000000   -9999.000000       0.048300       0.293000
54311     54311     hebei          117.7658       41.9606           72       191     2012      03        16        076              0.044500       1.829163       0.000000       0.188770       0.133000   -9999.000000       0.056100       0.340000
54311     54311     hebei          117.7658       41.9606           72       191     2012      03        17        077              0.029167       2.807220       0.000000       0.193525   -9999.000000   -9999.000000       0.035800       0.016000
54311     54311     hebei          117.7658       41.9606           72       191     2012      03        18        078              0.023875      -3.116150       0.000000       0.155060   -9999.000000   -9999.000000       0.040800       0.209000
54311     54311     hebei          117.7658       41.9606           72       191     2012      03        19        079              0.031375      -4.551483       0.000000       0.132422   -9999.000000   -9999.000000       0.042900       0.069000
54311     54311     hebei          117.7658       41.9606           72       191     2012      03        20        080              0.036833      -1.447754       0.000000       0.157257   -9999.000000   -9999.000000       0.041300       0.198000
54311     54311     hebei          117.7658       41.9606           72       191     2012      03        21        081              0.040083       1.212128       0.000000       0.172166   -9999.000000   -9999.000000       0.054000       0.271000
54311     54311     hebei          117.7658       41.9606           72       191     2012      03        22        082              0.043708       2.137848       0.404785       0.184390       0.136000   -9999.000000       0.058300   -9999.000000
54311     54311     hebei          117.7658       41.9606           72       191     2012      03        23        083              0.041667       2.952606       0.000000       0.200560   -9999.000000   -9999.000000       0.046900       0.464000
54311     54311     hebei          117.7658       41.9606           72       191     2012      03        24        084              0.033625       0.589264       0.000000       0.178725   -9999.000000   -9999.000000   -9999.000000       0.090000
54311     54311     hebei          117.7658       41.9606           72       191     2012      03        25        085              0.000000      -0.795288       0.000000       0.160898   -9999.000000   -9999.000000       0.042100       0.295000
54311     54311     hebei          117.7658       41.9606           72       191     2012      03        26        086              0.043458       1.117859       0.000000       0.176024   -9999.000000   -9999.000000   -9999.000000   -9999.000000
54311     54311     hebei          117.7658       41.9606           72       191     2012      03        27        087              0.047208       4.076935       0.000000       0.195141       0.146000   -9999.000000       0.058800   -9999.000000
54311     54311     hebei          117.7658       41.9606           72       191     2012      03        28        088              0.047000       5.300751       0.000000       0.202071       0.141000   -9999.000000       0.068600       0.599000
54311     54311     hebei          117.7658       41.9606           72       191     2012      03        29        089              0.046208       7.595947       0.000000       0.226939       0.120000   -9999.000000       0.046900       0.297000
54311     54311     hebei          117.7658       41.9606           72       191     2012      03        30        090              0.043958       4.783936       0.066856       0.195636   -9999.000000   -9999.000000       0.045100       0.234000
54311     54311     hebei          117.7658       41.9606           72       191     2012      03        31        091              0.041458      -0.692932       0.211292       0.163373   -9999.000000       0.032700       0.048100       0.177000
54311     54311     hebei          117.7658       41.9606           72       191     2012      04        01        092              0.042667       0.287140       0.000000       0.166444       0.157000       0.199300       0.056400       0.461000
54311     54311     hebei          117.7658       41.9606           72       191     2012      04        02        093              0.042875       2.910767       0.444629       0.188739       0.156000       0.081000       0.055300       0.426000
54311     54311     hebei          117.7658       41.9606           72       191     2012      04        03        094              0.042500       2.694336       0.000000       0.186274       0.131000   -9999.000000       0.058200       0.369000
54311     54311     hebei          117.7658       41.9606           72       191     2012      04        04        095              0.043708       4.246094       0.000000       0.208348       0.121000   -9999.000000       0.051800       0.339000
54311     54311     hebei          117.7658       41.9606           72       191     2012      04        05        096              0.043125       3.592957       0.000000       0.194542   -9999.000000       0.035500       0.052600       0.214000
54311     54311     hebei          117.7658       41.9606           72       191     2012      04        06        097              0.042958       3.003693       1.114721       0.193856       0.150000   -9999.000000       0.057400       0.373000
54311     54311     hebei          117.7658       41.9606           72       191     2012      04        07        098              0.043333       4.532440       0.460534       0.202248       0.143000       0.029600       0.056200       0.488000
54311     54311     hebei          117.7658       41.9606           72       191     2012      04        08        099              0.042750       9.823700       5.219160       0.219366       0.117000       0.030000       0.058300       0.417000
54311     54311     hebei          117.7658       41.9606           72       191     2012      04        09        100              0.042913       7.601593       0.000000       0.208983       0.121500       0.095400       0.063500       0.448000
54311     54311     hebei          117.7658       41.9606           72       191     2012      04        10        101              0.041333      12.219299       0.636554       0.212921   -9999.000000       0.191100       0.060200       0.407000
54311     54311     hebei          117.7658       41.9606           72       191     2012      04        11        102              0.041217       8.435699       0.113957       0.211987       0.146000   -9999.000000       0.066000       0.463000
54311     54311     hebei          117.7658       41.9606           72       191     2012      04        12        103              0.041875       7.731445       0.000000       0.214336       0.129000       0.037000       0.058200       0.401000
54311     54311     hebei          117.7658       41.9606           72       191     2012      04        13        104              0.041667       9.940247       0.000000       0.207901       0.112000       0.050400       0.057500       0.508000
54311     54311     hebei          117.7658       41.9606           72       191     2012      04        14        105              0.041083      11.864777       0.000000       0.204514       0.103000       0.208800       0.062500       0.569000
54311     54311     hebei          117.7658       41.9606           72       191     2012      04        15        106              0.039375      13.249420       0.000000       0.199440   -9999.000000       0.015600       0.059200       0.243000
54311     54311     hebei          117.7658       41.9606           72       191     2012      04        16        107              0.039130       8.298615       0.000000       0.189097   -9999.000000   -9999.000000       0.065500       0.410000
54311     54311     hebei          117.7658       41.9606           72       191     2012      04        17        108              0.038917       9.808197       0.000000       0.196141       0.113000   -9999.000000   -9999.000000       0.422000
54311     54311     hebei          117.7658       41.9606           72       191     2012      04        18        109              0.038250      14.322205       0.000000       0.191061       0.118000       0.026400   -9999.000000       0.403000
54311     54311     hebei          117.7658       41.9606           72       191     2012      04        19        110              0.037375      15.350098       0.000000       0.188261       0.115000       0.181000       0.070700       0.458000
54311     54311     hebei          117.7658       41.9606           72       191     2012      04        20        111              0.037125      11.024414       0.746554       0.193138       0.115000       0.143200   -9999.000000   -9999.000000
54311     54311     hebei          117.7658       41.9606           72       191     2012      04        21        112              0.035750      13.859192       0.000000       0.191687       0.120000       0.028600       0.063700       0.444000
54311     54311     hebei          117.7658       41.9606           72       191     2012      04        22        113              0.035917      11.616638       0.000000       0.193718       0.113500   -9999.000000       0.071000       0.417000
54311     54311     hebei          117.7658       41.9606           72       191     2012      04        23        114              0.041125      16.842041      11.056252       0.185975       0.120000   -9999.000000       0.081200       0.495000
54311     54311     hebei          117.7658       41.9606           72       191     2012      04        24        115              0.125125      16.930511      45.255276       0.209618   -9999.000000       0.315800       0.099700       0.841000
54311     54311     hebei          117.7658       41.9606           72       191     2012      04        25        116              0.000000       9.008636       0.000000       0.338096       0.163000       0.165100       0.105700   -9999.000000
54311     54311     hebei          117.7658       41.9606           72       191     2012      04        26        117              0.075625       7.539185       3.924170       0.287558       0.143000       0.091400       0.092100       0.664000
54311     54311     hebei          117.7658       41.9606           72       191     2012      04        27        118              0.069292      11.719513       0.253971       0.288711       0.147000       0.151500   -9999.000000       0.480000
54311     54311     hebei          117.7658       41.9606           72       191     2012      04        28        119              0.066792       6.265656       0.000000       0.274239       0.133000       0.119500       0.075500       0.518000
54311     54311     hebei          117.7658       41.9606           72       191     2012      04        29        120              0.064208       9.458282       0.000000       0.270175       0.108000       0.479500       0.068100       0.534000
54311     54311     hebei          117.7658       41.9606           72       191     2012      04        30        121              0.061958      13.917023       0.793994       0.263504       0.112000   -9999.000000       0.071000       0.565000
54311     54311     hebei          117.7658       41.9606           72       191     2012      05        01        122              0.060583      14.713013       3.480801       0.263833       0.145000       0.106800       0.074300       0.508000
54311     54311     hebei          117.7658       41.9606           72       191     2012      05        02        123              0.059417      16.759277       0.000000       0.264782       0.136500       0.288100       0.071900       0.502000
54311     54311     hebei          117.7658       41.9606           72       191     2012      05        03        124              0.057750      16.286285       0.000000       0.260452       0.119000       0.090700       0.072300       0.688000
54311     54311     hebei          117.7658       41.9606           72       191     2012      05        04        125              0.055625      18.224945       0.000000       0.248390       0.111000   -9999.000000       0.073900       0.512000
54311     54311     hebei          117.7658       41.9606           72       191     2012      05        05        126              0.053042      17.542450       0.000000       0.237846       0.111500   -9999.000000       0.064200       0.494000
54311     54311     hebei          117.7658       41.9606           72       191     2012      05        06        127              0.052083      17.046875       0.000000       0.229601       0.111000       0.011000       0.063500       0.540000
54311     54311     hebei          117.7658       41.9606           72       191     2012      05        07        128              0.049042      19.017700       0.159375       0.221450   -9999.000000   -9999.000000       0.078000       0.467000
54311     54311     hebei          117.7658       41.9606           72       191     2012      05        08        129              0.048083      14.548340       0.000000       0.225158       0.109500       0.081300       0.076000       0.442000
54311     54311     hebei          117.7658       41.9606           72       191     2012      05        09        130              0.046667      17.310638       0.187113       0.216517       0.113000   -9999.000000       0.083600       0.429000
54311     54311     hebei          117.7658       41.9606           72       191     2012      05        10        131              0.046250      18.241119       1.202862       0.213477       0.092000   -9999.000000       0.091300       0.547000
54311     54311     hebei          117.7658       41.9606           72       191     2012      05        11        132              0.088625      20.326324      14.376663       0.210700       0.226000       0.131800       0.107200       0.986000
54311     54311     hebei          117.7658       41.9606           72       191     2012      05        12        133              0.082917      12.359100       0.256501       0.293202       0.191000       0.309500       0.099900       0.566000
54311     54311     hebei          117.7658       41.9606           72       191     2012      05        13        134              0.074625      11.718170       2.651067       0.268012       0.225000       0.195900       0.106200       0.598000
54311     54311     hebei          117.7658       41.9606           72       191     2012      05        14        135              0.068583      10.003235       0.758866       0.270728       0.175000       0.092800       0.097100       0.643000
54311     54311     hebei          117.7658       41.9606           72       191     2012      05        15        136              0.063958      10.060730       0.000000       0.257703       0.167000       0.229500       0.098300       0.579000
54311     54311     hebei          117.7658       41.9606           72       191     2012      05        16        137              0.060917      10.278137       1.782932       0.252297       0.153500       0.157700       0.086900       0.514000
54311     54311     hebei          117.7658       41.9606           72       191     2012      05        17        138              0.060250      12.319489       0.000000       0.246392       0.145000       0.148100       0.080500       0.455000
54311     54311     hebei          117.7658       41.9606           72       191     2012      05        18        139              0.057833      17.720825       1.502307       0.236585       0.147000       0.129400       0.084100       0.483000
54311     54311     hebei          117.7658       41.9606           72       191     2012      05        19        140              0.055042      19.560364       0.503003       0.227972       0.152500       0.219700       0.090400   -9999.000000
54311     54311     hebei          117.7658       41.9606           72       191     2012      05        20        141              0.053500      18.332428       0.000000       0.226828       0.103000       0.413000       0.087000       0.508000
54311     54311     hebei          117.7658       41.9606           72       191     2012      05        21        142              0.052125      18.363434       0.072479       0.223504       0.192000       0.138900       0.108900       0.471000
54311     54311     hebei          117.7658       41.9606           72       191     2012      05        22        143              0.050083      18.463806       0.182831       0.220944       0.197000   -9999.000000       0.093100       0.494000
54311     54311     hebei          117.7658       41.9606           72       191     2012      05        23        144              0.047917      16.098480       0.000000       0.212301   -9999.000000   -9999.000000       0.092400       0.381000
54311     54311     hebei          117.7658       41.9606           72       191     2012      05        24        145              0.045708      15.906067       0.000000       0.203063       0.189000       0.037900       0.094000   -9999.000000
54311     54311     hebei          117.7658       41.9606           72       191     2012      05        25        146              0.000000      15.413391       0.000000       0.196128       0.189000   -9999.000000       0.097700       0.494000
54311     54311     hebei          117.7658       41.9606           72       191     2012      05        26        147              0.041542      17.108276       0.000000       0.188974       0.179500       0.038200       0.102900       0.442000
54311     54311     hebei          117.7658       41.9606           72       191     2012      05        27        148              0.039250      18.529022       0.000000       0.183790       0.181000   -9999.000000   -9999.000000       0.436000
54311     54311     hebei          117.7658       41.9606           72       191     2012      05        28        149              0.036542      21.727173       0.653203       0.176223       0.171000   -9999.000000       0.095700       0.502000
54311     54311     hebei          117.7658       41.9606           72       191     2012      05        29        150              0.053913      23.760345      12.354519       0.168644   -9999.000000       0.125400       0.115500       0.470000
54311     54311     hebei          117.7658       41.9606           72       191     2012      05        30        151              0.069083      14.365723       0.059148       0.245887       0.207000   -9999.000000       0.113400   -9999.000000
54311     54311     hebei          117.7658       41.9606           72       191     2012      05        31        152              0.059542      13.851776       0.448735       0.246837       0.159000       0.250800   -9999.000000   -9999.000000
54311     54311     hebei          117.7658       41.9606           72       191     2012      06        01        153              0.083333      16.690247       6.335565       0.233523       0.407500       0.032400       0.132600       0.559000
54311     54311     hebei          117.7658       41.9606           72       191     2012      06        02        154              0.086417      13.838440       0.680922       0.262182       0.469000   -9999.000000       0.112100       0.640000
54311     54311     hebei          117.7658       41.9606           72       191     2012      06        03        155              0.071208      14.351715       0.230071       0.255681       0.439500       0.233600       0.116500       0.704000
54311     54311     hebei          117.7658       41.9606           72       191     2012      06        04        156              0.063792      14.984100       0.136379       0.248011       0.365000   -9999.000000       0.136900       0.498000
54311     54311     hebei          117.7658       41.9606           72       191     2012      06        05        157              0.058000      17.432037       0.000000       0.234269       0.271000       0.116600       0.135400       0.499000
54311     54311     hebei          117.7658       41.9606           72       191     2012      06        06        158              0.053000      20.195801       1.455773       0.221718       0.423000       0.176200       0.149900       0.468000
54311     54311     hebei          117.7658       41.9606           72       191     2012      06        07        159              0.049000      17.993988       0.000000       0.232929       0.408000   -9999.000000       0.138700       0.461000
54311     54311     hebei          117.7658       41.9606           72       191     2012      06        08        160              0.042696      19.754242       0.417033       0.219777       0.376000       0.090100       0.098400       0.566000
54311     54311     hebei          117.7658       41.9606           72       191     2012      06        09        161              0.071583      20.466370       4.331085       0.211949       0.428000   -9999.000000       0.143300       0.643000
54311     54311     hebei          117.7658       41.9606           72       191     2012      06        10        162              0.068870      17.735107       0.000000       0.228598       0.271000   -9999.000000       0.126500       0.420000
54311     54311     hebei          117.7658       41.9606           72       191     2012      06        11        163              0.000000      16.234253       2.721760       0.213928       0.419000       0.114400       0.100600       0.737000
54311     54311     hebei          117.7658       41.9606           72       191     2012      06        12        164              0.052292      15.790771       0.239958       0.224525       0.471000   -9999.000000       0.095400       0.544000
54311     54311     hebei          117.7658       41.9606           72       191     2012      06        13        165              0.124000      14.461823      38.717579       0.229979   -9999.000000   -9999.000000   -9999.000000       0.962000
54311     54311     hebei          117.7658       41.9606           72       191     2012      06        14        166              0.128810      12.089447      17.807392       0.328135   -9999.000000   -9999.000000       0.126600       1.000000
54311     54311     hebei          117.7658       41.9606           72       191     2012      06        15        167              0.108348      13.607513       1.106691       0.325543   -9999.000000   -9999.000000       0.117000       0.737000
54311     54311     hebei          117.7658       41.9606           72       191     2012      06        16        168              0.086292      14.636871       1.053353       0.305350       0.489000       0.124400       0.119300       0.756000
54311     54311     hebei          117.7658       41.9606           72       191     2012      06        17        169              0.073875      19.201355       0.000000       0.290755       0.488000       0.130700       0.111100   -9999.000000
54311     54311     hebei          117.7658       41.9606           72       191     2012      06        18        170              0.064083      20.050781       2.252197       0.279291       0.486000       0.177100       0.122600       0.768000
54311     54311     hebei          117.7658       41.9606           72       191     2012      06        19        171              0.056750      22.591644       0.154027       0.276386       0.463500       0.043400       0.112000   -9999.000000
54311     54311     hebei          117.7658       41.9606           72       191     2012      06        20        172              0.111208      22.987976      15.448091       0.268642   -9999.000000       0.133700       0.082500       0.718000
54311     54311     hebei          117.7658       41.9606           72       191     2012      06        21        173              0.125583      21.986603      32.891621       0.299524       0.482000   -9999.000000       0.110300       0.818000
54311     54311     hebei          117.7658       41.9606           72       191     2012      06        22        174              0.112125      21.825104       0.438604       0.318647       0.473000       0.402100       0.135500   -9999.000000
54311     54311     hebei          117.7658       41.9606           72       191     2012      06        23        175              0.086667      21.348511       0.580801       0.313398   -9999.000000       0.157400       0.129700       0.857000
54311     54311     hebei          117.7658       41.9606           72       191     2012      06        24        176              0.134125      22.350494      27.798342       0.293746   -9999.000000       0.180200       0.134100       1.000000
54311     54311     hebei          117.7658       41.9606           72       191     2012      06        25        177              0.115333      19.225342       0.496513       0.334188   -9999.000000       0.335500       0.179200       0.962000
54311     54311     hebei          117.7658       41.9606           72       191     2012      06        26        178              0.092083      19.267548       0.424923       0.307898       0.475000       0.228100       0.166000       0.858000
54311     54311     hebei          117.7658       41.9606           72       191     2012      06        27        179              0.076500      20.990753       0.000000       0.293587       0.487000   -9999.000000       0.151400       0.994000
54311     54311     hebei          117.7658       41.9606           72       191     2012      06        28        180              0.067708      21.676697       0.564205       0.283450       0.486000   -9999.000000       0.157700       0.805000
54311     54311     hebei          117.7658       41.9606           72       191     2012      06        29        181              0.062167      18.080383       0.067722       0.282353       0.483000       0.215800       0.148800       0.828000
54311     54311     hebei          117.7658       41.9606           72       191     2012      06        30        182              0.051250      20.995667       0.207743       0.275626       0.466500       0.322600       0.131000   -9999.000000
54311     54311     hebei          117.7658       41.9606           72       191     2012      07        01        183              0.040833      22.498138       0.433469       0.264567       0.434000       0.132400       0.126600       0.605000
54311     54311     hebei          117.7658       41.9606           72       191     2012      07        02        184              0.035083      21.198700       0.000000       0.255163       0.439000   -9999.000000       0.092300       0.677000
54311     54311     hebei          117.7658       41.9606           72       191     2012      07        03        185              0.032125      20.176208       0.000000       0.251840       0.457000   -9999.000000       0.097800       0.685000
54311     54311     hebei          117.7658       41.9606           72       191     2012      07        04        186              0.030125      21.012512       0.241022       0.246733       0.471000       0.066100       0.095200       0.697000
54311     54311     hebei          117.7658       41.9606           72       191     2012      07        05        187              0.027750      23.041260       0.041919       0.241028   -9999.000000       0.076700       0.097800       0.643000
54311     54311     hebei          117.7658       41.9606           72       191     2012      07        06        188              0.027000      21.798401       0.664149       0.240957   -9999.000000       0.094200       0.089000       0.567000
54311     54311     hebei          117.7658       41.9606           72       191     2012      07        07        189              0.025000      22.943665       2.584851       0.236921   -9999.000000       0.016300       0.096600       0.786000
54311     54311     hebei          117.7658       41.9606           72       191     2012      07        08        190              0.025417      21.514923       0.000000       0.249626       0.444000       0.094100       0.093500       0.697000
54311     54311     hebei          117.7658       41.9606           72       191     2012      07        09        191              0.025667      22.965027       1.419007       0.248545       0.486000       0.335800       0.089100       0.763000
54311     54311     hebei          117.7658       41.9606           72       191     2012      07        10        192              0.027625      25.126556      11.790350       0.244535       0.483000       0.502700       0.101300       0.893000
54311     54311     hebei          117.7658       41.9606           72       191     2012      07        11        193              0.104250      21.158051      16.950167       0.289717   -9999.000000       0.178500       0.100800       0.951000
54311     54311     hebei          117.7658       41.9606           72       191     2012      07        12        194              0.105792      21.103760       2.437602       0.310844       0.480000       0.332200       0.097200       0.899000
54311     54311     hebei          117.7658       41.9606           72       191     2012      07        13        195              0.091625      20.322968       0.411551       0.294656   -9999.000000   -9999.000000       0.096900       0.805000
54311     54311     hebei          117.7658       41.9606           72       191     2012      07        14        196              0.076542      20.022797       0.000000       0.282631       0.488000       0.260000       0.088000       0.727000
54311     54311     hebei          117.7658       41.9606           72       191     2012      07        15        197              0.065792      20.603882       0.000000       0.270829       0.500000   -9999.000000       0.086800       0.686000
54311     54311     hebei          117.7658       41.9606           72       191     2012      07        16        198              0.056292      22.763153       0.000000       0.260719       0.472500   -9999.000000       0.085900   -9999.000000
54311     54311     hebei          117.7658       41.9606           72       191     2012      07        17        199              0.047667      23.561523       0.000000       0.252542       0.470000       0.133100       0.076900       0.754000
54311     54311     hebei          117.7658       41.9606           72       191     2012      07        18        200              0.041625      24.065887       0.000000       0.244039       0.462500       0.208800       0.078400       0.646000
54311     54311     hebei          117.7658       41.9606           72       191     2012      07        19        201              0.037417      24.357330       0.254761       0.238044       0.483000       0.164000       0.079300       0.719000
54311     54311     hebei          117.7658       41.9606           72       191     2012      07        20        202              0.033826      25.234375       1.111856       0.232438   -9999.000000       0.202300       0.088700       0.658000
54311     54311     hebei          117.7658       41.9606           72       191     2012      07        21        203              0.105333      25.002350      44.910160       0.232458   -9999.000000   -9999.000000       0.093800   -9999.000000
54311     54311     hebei          117.7658       41.9606           72       191     2012      07        22        204              0.113500      21.581146       0.000000       0.317591   -9999.000000       0.183200       0.094800       0.918000
54311     54311     hebei          117.7658       41.9606           72       191     2012      07        23        205              0.087167      20.717163       0.324920       0.306150   -9999.000000       0.312700       0.092000       0.810000
54311     54311     hebei          117.7658       41.9606           72       191     2012      07        24        206              0.075333      22.210663       0.000000       0.287606   -9999.000000       0.260900       0.087300       0.851000
54311     54311     hebei          117.7658       41.9606           72       191     2012      07        25        207              0.068833      23.032745       0.000000       0.278489   -9999.000000       0.114200       0.089800       0.762000
54311     54311     hebei          117.7658       41.9606           72       191     2012      07        26        208              0.063042      21.607971       0.433172       0.275254   -9999.000000       0.073400       0.084800       0.896000
54311     54311     hebei          117.7658       41.9606           72       191     2012      07        27        209              0.057333      22.364471       2.402193       0.269779   -9999.000000       0.125900       0.091600       0.810000
54311     54311     hebei          117.7658       41.9606           72       191     2012      07        28        210              0.079417      24.653564      15.524017       0.264401   -9999.000000       0.109100       0.096100       0.960000
54311     54311     hebei          117.7658       41.9606           72       191     2012      07        29        211              0.084917      21.348328       0.000000       0.311588   -9999.000000       0.155900       0.090200       0.934000
54311     54311     hebei          117.7658       41.9606           72       191     2012      07        30        212              0.070625      21.240662       3.440896       0.284450   -9999.000000       0.165100       0.087600       0.787000
54311     54311     hebei          117.7658       41.9606           72       191     2012      07        31        213              0.129167      21.282104       5.636834       0.279263   -9999.000000       0.252700       0.095400       0.997000
54311     54311     hebei          117.7658       41.9606           72       191     2012      08        01        214              0.133042      18.787598      11.880625       0.299923   -9999.000000       0.187300       0.096100       0.816000
54311     54311     hebei          117.7658       41.9606           72       191     2012      08        02        215              0.111542      18.357208       0.000000       0.310492   -9999.000000   -9999.000000       0.091700       0.865000
54311     54311     hebei          117.7658       41.9606           72       191     2012      08        03        216              0.092708      21.495361       0.176223       0.292328   -9999.000000   -9999.000000       0.087200       0.770000
54311     54311     hebei          117.7658       41.9606           72       191     2012      08        04        217              0.079000      23.926758       0.000000       0.280239   -9999.000000       0.153800       0.083700       0.790000
54311     54311     hebei          117.7658       41.9606           72       191     2012      08        05        218              0.070292      23.139618       0.000000       0.272200   -9999.000000       0.377200       0.082900       0.878000
54311     54311     hebei          117.7658       41.9606           72       191     2012      08        06        219              0.062417      24.040131       0.000000       0.263990   -9999.000000       0.131900       0.143200       0.750000
54311     54311     hebei          117.7658       41.9606           72       191     2012      08        07        220              0.056167      24.207764       2.309833       0.256419   -9999.000000   -9999.000000   -9999.000000       0.735000
54311     54311     hebei          117.7658       41.9606           72       191     2012      08        08        221              0.050167      25.730713       0.562486       0.257636   -9999.000000   -9999.000000       0.151100       0.689000
54311     54311     hebei          117.7658       41.9606           72       191     2012      08        09        222              0.044917      21.848175       0.000000       0.260763   -9999.000000       0.084500       0.136200       0.570000
54311     54311     hebei          117.7658       41.9606           72       191     2012      08        10        223              0.039458      22.857727       0.072991       0.249461   -9999.000000   -9999.000000       0.134000       0.716000
54311     54311     hebei          117.7658       41.9606           72       191     2012      08        11        224              0.036250      23.979736       0.097195       0.242165   -9999.000000       0.211200       0.139800       0.632000
54311     54311     hebei          117.7658       41.9606           72       191     2012      08        12        225              0.034125      21.205261       0.170447       0.243490       0.489000   -9999.000000       0.147300       0.604000
54311     54311     hebei          117.7658       41.9606           72       191     2012      08        13        226              0.032000      19.429199       1.246732       0.241236       0.492000   -9999.000000       0.165400       0.608000
54311     54311     hebei          117.7658       41.9606           72       191     2012      08        14        227              0.029625      20.455688       3.274635       0.243060       0.490000   -9999.000000   -9999.000000   -9999.000000
54311     54311     hebei          117.7658       41.9606           72       191     2012      08        15        228              0.028875      19.324860       0.000000       0.253079   -9999.000000       0.341200       0.161600       0.731000
54311     54311     hebei          117.7658       41.9606           72       191     2012      08        16        229              0.028375      20.450195       0.366847       0.248643   -9999.000000       0.071700       0.164100       0.654000
54311     54311     hebei          117.7658       41.9606           72       191     2012      08        17        230              0.027333      21.838593       0.000000       0.239537       0.499000       0.052900       0.167300       0.635000
54311     54311     hebei          117.7658       41.9606           72       191     2012      08        18        231              0.026333      21.614716       0.693349       0.238285       0.493000   -9999.000000       0.168500       0.580000
54311     54311     hebei          117.7658       41.9606           72       191     2012      08        19        232              0.026250      19.545319       0.000000       0.236456       0.492000       0.131400       0.171300   -9999.000000
54311     54311     hebei          117.7658       41.9606           72       191     2012      08        20        233              0.024625      21.139038       0.197154       0.227500   -9999.000000       0.368900       0.159600       0.636000
54311     54311     hebei          117.7658       41.9606           72       191     2012      08        21        234              0.023625      17.474518       0.331281       0.224681   -9999.000000   -9999.000000       0.160800       0.482000
54311     54311     hebei          117.7658       41.9606           72       191     2012      08        22        235              0.023208      15.823456       0.000000       0.220539   -9999.000000       0.121800       0.163700   -9999.000000
54311     54311     hebei          117.7658       41.9606           72       191     2012      08        23        236              0.023083      17.312378       0.000000       0.216711   -9999.000000       0.146200       0.171200       0.526000
54311     54311     hebei          117.7658       41.9606           72       191     2012      08        24        237              0.022500      20.003265       0.000000       0.212883   -9999.000000       0.055800       0.175800       0.582000
54311     54311     hebei          117.7658       41.9606           72       191     2012      08        25        238              0.000000      20.066681       0.000000       0.207498       0.498000   -9999.000000       0.175600   -9999.000000
54311     54311     hebei          117.7658       41.9606           72       191     2012      08        26        239              0.021500      21.262817       0.727343       0.202777   -9999.000000   -9999.000000       0.155600       0.602000
54311     54311     hebei          117.7658       41.9606           72       191     2012      08        27        240              0.020833      21.157440       0.000000       0.206050   -9999.000000       0.035300       0.197800       0.640000
54311     54311     hebei          117.7658       41.9606           72       191     2012      08        28        241              0.020917      21.769928       0.480220       0.204042   -9999.000000       0.284000       0.189700       0.584000
54311     54311     hebei          117.7658       41.9606           72       191     2012      08        29        242              0.020500      22.302856       0.000000       0.197297   -9999.000000       0.147200       0.193800       0.565000
54311     54311     hebei          117.7658       41.9606           72       191     2012      08        30        243              0.020000      21.967987       0.000000       0.189924   -9999.000000   -9999.000000       0.202300       0.587000
54311     54311     hebei          117.7658       41.9606           72       191     2012      08        31        244              0.019083      22.800018       0.284667       0.184437   -9999.000000   -9999.000000       0.178200       0.719000
54311     54311     hebei          117.7658       41.9606           72       191     2012      09        01        245              0.019083      22.140381      15.713378       0.185709   -9999.000000       0.094600       0.185400       0.559000
54311     54311     hebei          117.7658       41.9606           72       191     2012      09        02        246              0.130417      21.965485      29.747635       0.218660       0.492000       0.128500       0.228700       0.843000
54311     54311     hebei          117.7658       41.9606           72       191     2012      09        03        247              0.102750      15.001038       0.050455       0.326779   -9999.000000       0.150300       0.192200       0.843000
54311     54311     hebei          117.7658       41.9606           72       191     2012      09        04        248              0.087667      14.067352       0.000000       0.291141       0.482000       0.065000       0.182000       0.690000
54311     54311     hebei          117.7658       41.9606           72       191     2012      09        05        249              0.077333      13.102936       0.000000       0.279389       0.480000       0.221700       0.174800       0.616000
54311     54311     hebei          117.7658       41.9606           72       191     2012      09        06        250              0.069792      15.399750       0.000000       0.272054       0.468000       0.183000       0.163200       0.556000
54311     54311     hebei          117.7658       41.9606           72       191     2012      09        07        251              0.064042      17.572754       0.220007       0.266061       0.482000   -9999.000000       0.167800       0.527000
54311     54311     hebei          117.7658       41.9606           72       191     2012      09        08        252              0.059625      17.500122       0.000000       0.261778       0.477000   -9999.000000       0.164300       0.637000
54311     54311     hebei          117.7658       41.9606           72       191     2012      09        09        253              0.055417      18.163879       1.127130       0.257439   -9999.000000       0.144400       0.166900       0.575000
54311     54311     hebei          117.7658       41.9606           72       191     2012      09        10        254              0.051417      18.274872       0.000000       0.260233       0.479000       0.284400       0.168600       0.524000
54311     54311     hebei          117.7658       41.9606           72       191     2012      09        11        255              0.076833      18.973785      17.898233       0.254255       0.447000       0.099500       0.201900       1.000000
54311     54311     hebei          117.7658       41.9606           72       191     2012      09        12        256              0.096750      16.166901       0.000000       0.304068   -9999.000000   -9999.000000       0.200000   -9999.000000
54311     54311     hebei          117.7658       41.9606           72       191     2012      09        13        257              0.085250      11.861084       0.221675       0.288160       0.454500   -9999.000000       0.194700       0.719000
54311     54311     hebei          117.7658       41.9606           72       191     2012      09        14        258              0.078750      11.716461       0.192654       0.278068       0.387000       0.133800       0.181800       0.583000
54311     54311     hebei          117.7658       41.9606           72       191     2012      09        15        259              0.074083      12.673035       0.000000       0.272947   -9999.000000       0.154000       0.177500       0.679000
54311     54311     hebei          117.7658       41.9606           72       191     2012      09        16        260              0.070167      13.674988       0.000000       0.267434       0.378000       0.135400       0.180800       0.517000
54311     54311     hebei          117.7658       41.9606           72       191     2012      09        17        261              0.067042      14.110687       0.300122       0.262753       0.395000       0.082900       0.146000   -9999.000000
54311     54311     hebei          117.7658       41.9606           72       191     2012      09        18        262              0.063958      14.086823       0.000000       0.259485       0.390000       0.020300       0.143000       0.530000
54311     54311     hebei          117.7658       41.9606           72       191     2012      09        19        263              0.061609      14.383240       0.000000       0.255312       0.407000   -9999.000000       0.151800       0.484000
54311     54311     hebei          117.7658       41.9606           72       191     2012      09        20        264              0.059458      14.402771       0.000000       0.253188       0.345000       0.277600       0.156500       0.532000
54311     54311     hebei          117.7658       41.9606           72       191     2012      09        21        265              0.057833      15.738098       6.060032       0.250451   -9999.000000       0.152800       0.171600       0.810000
54311     54311     hebei          117.7658       41.9606           72       191     2012      09        22        266              0.056625      15.662811       1.013175       0.273119       0.262000       0.096400       0.180700       0.792000
54311     54311     hebei          117.7658       41.9606           72       191     2012      09        23        267              0.056000      14.851959       0.810973       0.272719       0.246000   -9999.000000       0.166900       0.702000
54311     54311     hebei          117.7658       41.9606           72       191     2012      09        24        268              0.054833      15.192444       0.127751       0.268450       0.256500       0.164400       0.152300       0.565000
54311     54311     hebei          117.7658       41.9606           72       191     2012      09        25        269              0.059667      15.680817       5.593747       0.262722   -9999.000000   -9999.000000       0.160100       0.841000
54311     54311     hebei          117.7658       41.9606           72       191     2012      09        26        270              0.066917      12.158783       0.687158       0.283503       0.265000       0.096300       0.157700       0.566000
54311     54311     hebei          117.7658       41.9606           72       191     2012      09        27        271              0.100286      13.815552       9.466625       0.271190   -9999.000000       0.109300       0.183700       0.921000
54311     54311     hebei          117.7658       41.9606           72       191     2012      09        28        272              0.086867       9.867065       0.092983       0.300614   -9999.000000   -9999.000000       0.178800       0.595000
54311     54311     hebei          117.7658       41.9606           72       191     2012      09        29        273              0.080958       8.836304       0.172941       0.278982       0.307000   -9999.000000       0.163800       0.600000
54311     54311     hebei          117.7658       41.9606           72       191     2012      09        30        274              0.074750       9.944702       0.000000       0.271519       0.278000   -9999.000000       0.166700       0.490000
54311     54311     hebei          117.7658       41.9606           72       191     2012      10        01        275              0.070708      11.083771       0.000000       0.267626       0.162000   -9999.000000       0.147200       0.495000
54311     54311     hebei          117.7658       41.9606           72       191     2012      10        02        276              0.067250      12.021545       0.201744       0.263635       0.165500       0.124000       0.138900       0.596000
54311     54311     hebei          117.7658       41.9606           72       191     2012      10        03        277              0.064417      12.635254       0.000000       0.261389       0.168000       0.123300       0.146100       0.485000
54311     54311     hebei          117.7658       41.9606           72       191     2012      10        04        278              0.062208      10.241974       0.000000       0.258567       0.171000       0.102000       0.134000       0.506000
54311     54311     hebei          117.7658       41.9606           72       191     2012      10        05        279              0.060250      10.691071       0.000000       0.255771       0.186000   -9999.000000       0.130900       0.466000
54311     54311     hebei          117.7658       41.9606           72       191     2012      10        06        280              0.058875      10.192535       0.000000       0.254044       0.187000       0.117000       0.140200       0.386000
54311     54311     hebei          117.7658       41.9606           72       191     2012      10        07        281              0.057125      10.804565       0.000000       0.252401       0.183500       0.131500       0.137600       0.526000
54311     54311     hebei          117.7658       41.9606           72       191     2012      10        08        282              0.055750      11.631531       1.283035       0.250774       0.181000       0.163700       0.114900       0.439000
54311     54311     hebei          117.7658       41.9606           72       191     2012      10        09        283              0.054083      13.159149       0.000000       0.252717   -9999.000000       0.209900       0.109200       0.418000
54311     54311     hebei          117.7658       41.9606           72       191     2012      10        10        284              0.053083       7.256470       0.000000       0.255263       0.198500       0.075800       0.100900       0.422000
54311     54311     hebei          117.7658       41.9606           72       191     2012      10        11        285              0.052500       7.507263       0.628367       0.252577       0.173000       0.153800       0.102600   -9999.000000
54311     54311     hebei          117.7658       41.9606           72       191     2012      10        12        286              0.051625       9.296356       0.929112       0.253626       0.162000       0.125100       0.107800       0.571000
54311     54311     hebei          117.7658       41.9606           72       191     2012      10        13        287              0.050125       9.693146       0.000000       0.252163       0.151000   -9999.000000       0.099100       0.328000
54311     54311     hebei          117.7658       41.9606           72       191     2012      10        14        288              0.049833       5.202728       0.000000       0.246705   -9999.000000       0.044900       0.108700       0.416000
54311     54311     hebei          117.7658       41.9606           72       191     2012      10        15        289              0.049348       5.957947       4.790830       0.246262       0.158500       0.135200   -9999.000000       0.443000
54311     54311     hebei          117.7658       41.9606           72       191     2012      10        16        290              0.075333       7.279968       4.276642       0.255753   -9999.000000   -9999.000000       0.113200   -9999.000000
54311     54311     hebei          117.7658       41.9606           72       191     2012      10        17        291              0.072125       3.576477       0.000000       0.259844       0.200000       0.134100       0.113400       0.528000
54311     54311     hebei          117.7658       41.9606           72       191     2012      10        18        292              0.067458       3.646301       0.000000       0.251886       0.193000       0.342600       0.098800       0.454000
54311     54311     hebei          117.7658       41.9606           72       191     2012      10        19        293              0.064833       4.375610       0.000000       0.244215   -9999.000000   -9999.000000       0.097400       0.485000
54311     54311     hebei          117.7658       41.9606           72       191     2012      10        20        294              0.062750       5.683105       0.000000       0.252570   -9999.000000   -9999.000000       0.105500       0.453000
54311     54311     hebei          117.7658       41.9606           72       191     2012      10        21        295              0.092375       5.977844       9.576247       0.253727   -9999.000000   -9999.000000       0.100000       0.494000
54311     54311     hebei          117.7658       41.9606           72       191     2012      10        22        296              0.116250       3.057800       1.787679       0.275650   -9999.000000   -9999.000000       0.088000       0.557000
54311     54311     hebei          117.7658       41.9606           72       191     2012      10        23        297              0.100542       2.599274       0.000000       0.273921   -9999.000000   -9999.000000       0.096700       0.659000
54311     54311     hebei          117.7658       41.9606           72       191     2012      10        24        298              0.092083       4.297455       0.000000       0.270449   -9999.000000   -9999.000000       0.079800       0.697000
54311     54311     hebei          117.7658       41.9606           72       191     2012      10        25        299              0.000000       5.679352       0.000000       0.269119   -9999.000000   -9999.000000       0.084700       0.633000
54311     54311     hebei          117.7658       41.9606           72       191     2012      10        26        300              0.081583       6.888153       0.122385       0.267888       0.175000   -9999.000000       0.091800       0.707000
54311     54311     hebei          117.7658       41.9606           72       191     2012      10        27        301              0.077750       7.973877       0.000000       0.266657       0.183000       0.245200       0.081500       0.526000
54311     54311     hebei          117.7658       41.9606           72       191     2012      10        28        302              0.000000       5.758423       0.000000       0.252842       0.154000       0.056800       0.087400       0.411000
54311     54311     hebei          117.7658       41.9606           72       191     2012      10        29        303              0.071458       3.908783       1.131697       0.250784       0.141000   -9999.000000       0.064700       0.171000
54311     54311     hebei          117.7658       41.9606           72       191     2012      10        30        304              0.068417       1.403687       0.674310       0.206613   -9999.000000       0.081400       0.060100       0.142000
54311     54311     hebei          117.7658       41.9606           72       191     2012      10        31        305              0.067167       0.638885       3.637619       0.196374   -9999.000000       0.215600       0.063100       0.308000
54311     54311     hebei          117.7658       41.9606           72       191     2012      11        01        306              0.066583       0.222229       0.000000       0.184991       0.162000       0.053900       0.063200       0.313000
54311     54311     hebei          117.7658       41.9606           72       191     2012      11        02        307              0.065833       1.268402       0.000000       0.205124       0.159000       0.101400       0.065600       0.417000
54311     54311     hebei          117.7658       41.9606           72       191     2012      11        03        308              0.066542       2.595245       4.665781       0.244553       0.145000       0.329600       0.073000       0.464000
54311     54311     hebei          117.7658       41.9606           72       191     2012      11        04        309              0.082542       3.324066       1.845050       0.259499   -9999.000000   -9999.000000       0.066400       0.286000
54311     54311     hebei          117.7658       41.9606           72       191     2012      11        05        310              0.107750       0.702759       0.407494       0.233414   -9999.000000   -9999.000000       0.043800       0.314000
54311     54311     hebei          117.7658       41.9606           72       191     2012      11        06        311              0.102375       0.028778       0.000000       0.199543       0.153000   -9999.000000       0.044500       0.308000
54311     54311     hebei          117.7658       41.9606           72       191     2012      11        07        312              0.094417      -0.358032       0.000000       0.177121   -9999.000000   -9999.000000       0.046600       0.232000
54311     54311     hebei          117.7658       41.9606           72       191     2012      11        08        313              0.087000      -0.508972       1.351873       0.178555       0.139000   -9999.000000   -9999.000000       0.314000
54311     54311     hebei          117.7658       41.9606           72       191     2012      11        09        314              0.085375      -0.371124       0.000000       0.172102   -9999.000000       0.048100       0.054900   -9999.000000
54311     54311     hebei          117.7658       41.9606           72       191     2012      11        10        315              0.090833      -0.064636       4.230197       0.172403   -9999.000000   -9999.000000       0.041300       0.273000
54311     54311     hebei          117.7658       41.9606           72       191     2012      11        11        316              0.085000       0.341644       0.000000       0.185708   -9999.000000   -9999.000000       0.044700       0.158000
54311     54311     hebei          117.7658       41.9606           72       191     2012      11        12        317              0.060750      -0.940094       0.000000       0.147728   -9999.000000       0.058500       0.038200       0.095000
54311     54311     hebei          117.7658       41.9606           72       191     2012      11        13        318              0.000000      -1.869385       0.000000       0.131311   -9999.000000       0.091900       0.032900       0.174000
54311     54311     hebei          117.7658       41.9606           72       191     2012      11        14        319              0.023417      -2.897125       0.000000       0.121890   -9999.000000       0.057000       0.039200   -9999.000000
54311     54311     hebei          117.7658       41.9606           72       191     2012      11        15        320              0.025458      -5.167480       1.230812       0.120020   -9999.000000       0.019100       0.040500       0.285000
54311     54311     hebei          117.7658       41.9606           72       191     2012      11        16        321              0.025125      -1.774475       0.000000       0.135411   -9999.000000   -9999.000000       0.032700       0.120000
54311     54311     hebei          117.7658       41.9606           72       191     2012      11        17        322              0.000000      -4.233826       0.000000       0.123913   -9999.000000       0.201400       0.038100       0.147000
54311     54311     hebei          117.7658       41.9606           72       191     2012      11        18        323              0.019167      -4.844177       0.000000       0.117104   -9999.000000   -9999.000000       0.033500       0.138000
54311     54311     hebei          117.7658       41.9606           72       191     2012      11        19        324              0.019167      -4.397308       0.000000       0.115145   -9999.000000       0.000200       0.033600       0.140000
54311     54311     hebei          117.7658       41.9606           72       191     2012      11        20        325              0.018333      -5.457703       0.000000       0.113360   -9999.000000       0.022000       0.034000       0.166000
54311     54311     hebei          117.7658       41.9606           72       191     2012      11        21        326              0.018833      -4.647186       1.522212       0.117513   -9999.000000       0.154200       0.031500       0.099000
54311     54311     hebei          117.7658       41.9606           72       191     2012      11        22        327              0.017875      -3.140900       0.000000       0.128303   -9999.000000   -9999.000000       0.030400       0.083000
54311     54311     hebei          117.7658       41.9606           72       191     2012      11        23        328              0.016167      -7.045197       0.000000       0.109525   -9999.000000       0.111400       0.031300       0.127000
54311     54311     hebei          117.7658       41.9606           72       191     2012      11        24        329              0.015958      -7.212067       0.000000       0.102952   -9999.000000   -9999.000000       0.030400       0.132000
54311     54311     hebei          117.7658       41.9606           72       191     2012      11        25        330              0.014875      -5.270660       0.000000       0.105739   -9999.000000   -9999.000000       0.029400       0.075000
54311     54311     hebei          117.7658       41.9606           72       191     2012      11        26        331              0.013792      -8.023804       0.000000       0.102764   -9999.000000       0.324300       0.028600       0.038000
54311     54311     hebei          117.7658       41.9606           72       191     2012      11        27        332              0.015125      -9.535095       0.000000       0.100480   -9999.000000   -9999.000000       0.027900       0.130000
54311     54311     hebei          117.7658       41.9606           72       191     2012      11        28        333              0.013583      -6.320007       0.000000       0.103385   -9999.000000       0.224300       0.028900       0.064000
54311     54311     hebei          117.7658       41.9606           72       191     2012      11        29        334              0.012708      -9.385132       0.000000       0.100342   -9999.000000   -9999.000000   -9999.000000       0.078000
54311     54311     hebei          117.7658       41.9606           72       191     2012      11        30        335              0.011250     -11.728729       0.000000       0.098818   -9999.000000   -9999.000000       0.025800       0.076000
54311     54311     hebei          117.7658       41.9606           72       191     2012      12        01        336              0.011333     -14.247131       0.000000       0.096507   -9999.000000   -9999.000000       0.027400       0.001000
54311     54311     hebei          117.7658       41.9606           72       191     2012      12        02        337              0.012125     -11.438049       0.193461       0.097328   -9999.000000   -9999.000000       0.025700       0.092000
54311     54311     hebei          117.7658       41.9606           72       191     2012      12        03        338              0.011833      -7.215424       0.000000       0.098919   -9999.000000   -9999.000000       0.024700       0.056000
54311     54311     hebei          117.7658       41.9606           72       191     2012      12        04        339              0.011333     -11.804260       0.000000       0.097912   -9999.000000   -9999.000000       0.022900       0.082000
54311     54311     hebei          117.7658       41.9606           72       191     2012      12        05        340              0.010870     -12.139496       0.000000       0.096795   -9999.000000   -9999.000000       0.023100       0.055000
54311     54311     hebei          117.7658       41.9606           72       191     2012      12        06        341              0.010625     -15.341492       0.000000       0.095936   -9999.000000   -9999.000000       0.022800       0.016000
54311     54311     hebei          117.7658       41.9606           72       191     2012      12        07        342              0.010292     -15.598480       0.000000       0.094935   -9999.000000   -9999.000000       0.019900       0.116000
54311     54311     hebei          117.7658       41.9606           72       191     2012      12        08        343              0.009500     -17.183090       0.000000       0.093777   -9999.000000   -9999.000000       0.024900   -9999.000000
54311     54311     hebei          117.7658       41.9606           72       191     2012      12        09        344              0.010167     -18.592072       0.000000       0.093810   -9999.000000   -9999.000000       0.027000       0.067000
54311     54311     hebei          117.7658       41.9606           72       191     2012      12        10        345              0.010958     -14.736145       0.000000       0.094407   -9999.000000   -9999.000000       0.016000       0.019000
54311     54311     hebei          117.7658       41.9606           72       191     2012      12        11        346              0.010958     -13.644409       0.000000       0.094699   -9999.000000   -9999.000000       0.019800       0.006000
54311     54311     hebei          117.7658       41.9606           72       191     2012      12        12        347              0.011125     -13.007477       0.000000       0.094656   -9999.000000   -9999.000000       0.018300       0.100000
54311     54311     hebei          117.7658       41.9606           72       191     2012      12        13        348              0.011875     -11.782806       0.000000       0.095341   -9999.000000   -9999.000000       0.019700   -9999.000000
54311     54311     hebei          117.7658       41.9606           72       191     2012      12        14        349              0.012000     -10.524414       1.438329       0.095762   -9999.000000   -9999.000000       0.024000       0.047000
54311     54311     hebei          117.7658       41.9606           72       191     2012      12        15        350              0.000000      -9.445465       0.000000       0.096275   -9999.000000   -9999.000000       0.022100       0.009000
54311     54311     hebei          117.7658       41.9606           72       191     2012      12        16        351              0.012000      -9.256073       0.110679       0.098283   -9999.000000   -9999.000000   -9999.000000       0.024000
54311     54311     hebei          117.7658       41.9606           72       191     2012      12        17        352              0.011739     -10.116608       0.000000       0.096928   -9999.000000   -9999.000000       0.017800       0.113000
54311     54311     hebei          117.7658       41.9606           72       191     2012      12        18        353              0.011375     -14.460785       0.000000       0.095921   -9999.000000   -9999.000000       0.015000       0.106000
54311     54311     hebei          117.7658       41.9606           72       191     2012      12        19        354              0.011542     -14.747009       0.000000       0.095001   -9999.000000   -9999.000000       0.015900       0.001000
54311     54311     hebei          117.7658       41.9606           72       191     2012      12        20        355              0.000000     -13.808533       2.027974       0.095122   -9999.000000   -9999.000000       0.020200       0.023000
54311     54311     hebei          117.7658       41.9606           72       191     2012      12        21        356              0.012000     -10.352325       0.000000       0.095409   -9999.000000   -9999.000000       0.012400       0.041000
54311     54311     hebei          117.7658       41.9606           72       191     2012      12        22        357              0.011750     -10.554016       0.000000       0.096086   -9999.000000   -9999.000000       0.017700       0.123000
54311     54311     hebei          117.7658       41.9606           72       191     2012      12        23        358              0.011125     -11.278015       0.000000       0.096314   -9999.000000   -9999.000000   -9999.000000       0.042000
54311     54311     hebei          117.7658       41.9606           72       191     2012      12        24        359              0.010389     -12.992340       0.000000       0.096259   -9999.000000   -9999.000000       0.013400       0.051000
54311     54311     hebei          117.7658       41.9606           72       191     2012      12        25        360              0.010542     -13.443817       0.000000       0.096070   -9999.000000   -9999.000000       0.017700       0.034000
54311     54311     hebei          117.7658       41.9606           72       191     2012      12        26        361              0.000000     -13.837433       0.000000       0.096119   -9999.000000   -9999.000000       0.022700       0.033000
54311     54311     hebei          117.7658       41.9606           72       191     2012      12        27        362              0.010800     -13.476807       0.000000       0.095984   -9999.000000   -9999.000000       0.015400       0.073000
54311     54311     hebei          117.7658       41.9606           72       191     2012      12        28        363              0.010000     -12.482422       0.000000       0.096122   -9999.000000   -9999.000000       0.020200       0.064000
54311     54311     hebei          117.7658       41.9606           72       191     2012      12        29        364              0.000000     -11.563568       0.000000       0.096081   -9999.000000   -9999.000000   -9999.000000   -9999.000000
54311     54311     hebei          117.7658       41.9606           72       191     2012      12        30        365              0.000000     -13.661438       0.000000       0.096042   -9999.000000   -9999.000000       0.010400       0.028000
54311     54311     hebei          117.7658       41.9606           72       191     2012      12        31        366              0.010667     -15.227844       0.000000       0.095740   -9999.000000   -9999.000000       0.014300   -9999.000000
