# Supplementary material for: Research on Fusing Multisatellite Soil Moisture Data Based on Bayesian Model Averaging
Source: Hindawi journal article supplement (doi:10.1155/2018/9310838), 2018-06-25
Supplement: f1 [file 9310838.f1.zip › 2012_sm00-10cm_daily_ZDB_ZHY_54320_366days_allin.txt]

54320     54320     neimenggu      119.3497       41.0600           76       197     2012      01        01        001              0.000000   -9999.000000       0.000000   -9999.000000   -9999.000000   -9999.000000       0.069600   -9999.000000
54320     54320     neimenggu      119.3497       41.0600           76       197     2012      01        02        002              0.000000     -10.583954       0.000000       0.118714   -9999.000000   -9999.000000       0.055600       0.019000
54320     54320     neimenggu      119.3497       41.0600           76       197     2012      01        03        003              0.000000     -10.303070       0.000000       0.119194   -9999.000000   -9999.000000       0.057500       0.043000
54320     54320     neimenggu      119.3497       41.0600           76       197     2012      01        04        004              0.000000     -11.957672       0.000000       0.118228   -9999.000000   -9999.000000       0.059100       0.035000
54320     54320     neimenggu      119.3497       41.0600           76       197     2012      01        05        005              0.000000     -10.744690       0.000000       0.118213   -9999.000000   -9999.000000       0.057400   -9999.000000
54320     54320     neimenggu      119.3497       41.0600           76       197     2012      01        06        006              0.000000      -9.381012       0.000000       0.119005   -9999.000000   -9999.000000       0.067100       0.061000
54320     54320     neimenggu      119.3497       41.0600           76       197     2012      01        07        007              0.000000     -12.577667       0.000000       0.117596   -9999.000000   -9999.000000       0.067400       0.007000
54320     54320     neimenggu      119.3497       41.0600           76       197     2012      01        08        008              0.000000     -10.983032       0.000000       0.118038   -9999.000000   -9999.000000       0.057100       0.048000
54320     54320     neimenggu      119.3497       41.0600           76       197     2012      01        09        009              0.000000     -10.830963       0.000000       0.118405   -9999.000000   -9999.000000       0.062300       0.020000
54320     54320     neimenggu      119.3497       41.0600           76       197     2012      01        10        010              0.000000     -11.020050       0.000000       0.117788   -9999.000000   -9999.000000   -9999.000000   -9999.000000
54320     54320     neimenggu      119.3497       41.0600           76       197     2012      01        11        011              0.000000     -10.893127       0.000000       0.117770   -9999.000000   -9999.000000       0.062600       0.055000
54320     54320     neimenggu      119.3497       41.0600           76       197     2012      01        12        012              0.000000     -10.071228       0.000000       0.118095   -9999.000000   -9999.000000       0.073000       0.010000
54320     54320     neimenggu      119.3497       41.0600           76       197     2012      01        13        013              0.000000      -8.149170       0.000000       0.121785   -9999.000000   -9999.000000       0.057200       0.082000
54320     54320     neimenggu      119.3497       41.0600           76       197     2012      01        14        014              0.000000      -7.849884       0.000000       0.121629   -9999.000000   -9999.000000       0.060700       0.030000
54320     54320     neimenggu      119.3497       41.0600           76       197     2012      01        15        015              0.000000      -8.619904       0.000000       0.121200   -9999.000000   -9999.000000       0.065900       0.025000
54320     54320     neimenggu      119.3497       41.0600           76       197     2012      01        16        016              0.000000      -7.120575       0.000000       0.121452   -9999.000000   -9999.000000       0.064900       0.032000
54320     54320     neimenggu      119.3497       41.0600           76       197     2012      01        17        017              0.000000      -6.952148       0.000000       0.122888   -9999.000000   -9999.000000       0.065300       0.013000
54320     54320     neimenggu      119.3497       41.0600           76       197     2012      01        18        018              0.000000      -8.175201       0.000000       0.120314   -9999.000000   -9999.000000       0.071300       0.011000
54320     54320     neimenggu      119.3497       41.0600           76       197     2012      01        19        019              0.000000      -7.774292       0.000000       0.121876   -9999.000000   -9999.000000       0.054300       0.006000
54320     54320     neimenggu      119.3497       41.0600           76       197     2012      01        20        020              0.000000      -8.454468       0.000000       0.119712   -9999.000000   -9999.000000       0.063700       0.034000
54320     54320     neimenggu      119.3497       41.0600           76       197     2012      01        21        021              0.000000     -12.308624       0.000000       0.118418   -9999.000000   -9999.000000       0.059000       0.015000
54320     54320     neimenggu      119.3497       41.0600           76       197     2012      01        22        022              0.000000     -14.553772       0.000000       0.116546   -9999.000000   -9999.000000       0.058200       0.018000
54320     54320     neimenggu      119.3497       41.0600           76       197     2012      01        23        023              0.000000     -14.566925       0.000000       0.116196   -9999.000000   -9999.000000       0.074100       0.038000
54320     54320     neimenggu      119.3497       41.0600           76       197     2012      01        24        024              0.000000     -12.692078       0.000000       0.116717   -9999.000000   -9999.000000       0.078400       0.001000
54320     54320     neimenggu      119.3497       41.0600           76       197     2012      01        25        025              0.000000     -12.630219       0.000000       0.116905   -9999.000000   -9999.000000       0.062400       0.082000
54320     54320     neimenggu      119.3497       41.0600           76       197     2012      01        26        026              0.000000     -11.774261       0.000000       0.116774   -9999.000000   -9999.000000       0.066900       0.017000
54320     54320     neimenggu      119.3497       41.0600           76       197     2012      01        27        027              0.000000      -9.181732       0.000000       0.118884   -9999.000000   -9999.000000   -9999.000000       0.011000
54320     54320     neimenggu      119.3497       41.0600           76       197     2012      01        28        028              0.000000     -10.702484       0.000000       0.116936   -9999.000000   -9999.000000       0.069200       0.005000
54320     54320     neimenggu      119.3497       41.0600           76       197     2012      01        29        029              0.000000     -12.241852       0.000000       0.116476   -9999.000000   -9999.000000       0.077500   -9999.000000
54320     54320     neimenggu      119.3497       41.0600           76       197     2012      01        30        030              0.000000     -12.573425       0.000000       0.115806   -9999.000000   -9999.000000       0.059300       0.052000
54320     54320     neimenggu      119.3497       41.0600           76       197     2012      01        31        031              0.000000     -10.585205       0.000000       0.116609   -9999.000000   -9999.000000       0.063500       0.027000
54320     54320     neimenggu      119.3497       41.0600           76       197     2012      02        01        032              0.000000     -12.833374       0.000000       0.116395   -9999.000000   -9999.000000   -9999.000000       0.046000
54320     54320     neimenggu      119.3497       41.0600           76       197     2012      02        02        033              0.000000     -14.530762       0.000000       0.115191   -9999.000000   -9999.000000       0.068000       0.035000
54320     54320     neimenggu      119.3497       41.0600           76       197     2012      02        03        034              0.000000     -12.181915       0.000000       0.115737   -9999.000000   -9999.000000       0.065400   -9999.000000
54320     54320     neimenggu      119.3497       41.0600           76       197     2012      02        04        035              0.000000      -9.774048       0.000000       0.116947   -9999.000000   -9999.000000       0.077800       0.049000
54320     54320     neimenggu      119.3497       41.0600           76       197     2012      02        05        036              0.000000      -7.446106       0.000000       0.119647   -9999.000000   -9999.000000       0.059300       0.016000
54320     54320     neimenggu      119.3497       41.0600           76       197     2012      02        06        037              0.000000      -5.802917       0.000000       0.131542   -9999.000000   -9999.000000       0.066500       0.016000
54320     54320     neimenggu      119.3497       41.0600           76       197     2012      02        07        038              0.000000     -10.139587       0.000000       0.122097   -9999.000000   -9999.000000       0.069400       0.003000
54320     54320     neimenggu      119.3497       41.0600           76       197     2012      02        08        039              0.000000     -10.744049       0.000000       0.118407   -9999.000000   -9999.000000       0.066400   -9999.000000
54320     54320     neimenggu      119.3497       41.0600           76       197     2012      02        09        040              0.000000      -9.320984       0.000000       0.119003   -9999.000000   -9999.000000       0.079200       0.061000
54320     54320     neimenggu      119.3497       41.0600           76       197     2012      02        10        041              0.000000      -8.007294       0.000000       0.126396   -9999.000000   -9999.000000       0.078300       0.008000
54320     54320     neimenggu      119.3497       41.0600           76       197     2012      02        11        042              0.000000      -7.879883       0.000000       0.124361       0.099000   -9999.000000       0.063800       0.038000
54320     54320     neimenggu      119.3497       41.0600           76       197     2012      02        12        043              0.000000      -7.719543       0.000000       0.135414   -9999.000000   -9999.000000       0.071800       0.032000
54320     54320     neimenggu      119.3497       41.0600           76       197     2012      02        13        044              0.122300      -4.813080       0.000000       0.139440   -9999.000000   -9999.000000   -9999.000000       0.113000
54320     54320     neimenggu      119.3497       41.0600           76       197     2012      02        14        045              0.119375      -2.483582       0.200061       0.168459       0.106000       0.038100       0.072300       0.103000
54320     54320     neimenggu      119.3497       41.0600           76       197     2012      02        15        046              0.118792      -7.132690       0.000000       0.148069   -9999.000000   -9999.000000       0.081100       0.059000
54320     54320     neimenggu      119.3497       41.0600           76       197     2012      02        16        047              0.117667      -5.947113       0.000000       0.141274   -9999.000000   -9999.000000       0.065300       0.032000
54320     54320     neimenggu      119.3497       41.0600           76       197     2012      02        17        048              0.116750      -7.643127       0.000000       0.129884   -9999.000000   -9999.000000       0.070700       0.060000
54320     54320     neimenggu      119.3497       41.0600           76       197     2012      02        18        049              0.117542      -8.723114       0.000000       0.124991   -9999.000000   -9999.000000   -9999.000000       0.007000
54320     54320     neimenggu      119.3497       41.0600           76       197     2012      02        19        050              0.119333      -7.506134       0.000000       0.132486       0.104000   -9999.000000       0.074800       0.014000
54320     54320     neimenggu      119.3497       41.0600           76       197     2012      02        20        051              0.119000      -4.187531       0.000000       0.159677       0.106000   -9999.000000       0.072100       0.046000
54320     54320     neimenggu      119.3497       41.0600           76       197     2012      02        21        052              0.120667      -4.417236       0.000000       0.165434       0.111000   -9999.000000       0.079200       0.090000
54320     54320     neimenggu      119.3497       41.0600           76       197     2012      02        22        053              0.120583      -1.737366       0.224069       0.176938   -9999.000000   -9999.000000       0.068100       0.016000
54320     54320     neimenggu      119.3497       41.0600           76       197     2012      02        23        054              0.119625      -4.597473       0.771856       0.163054   -9999.000000   -9999.000000       0.069700       0.052000
54320     54320     neimenggu      119.3497       41.0600           76       197     2012      02        24        055              0.120167      -4.496002       0.549233       0.156124   -9999.000000   -9999.000000       0.072700       0.012000
54320     54320     neimenggu      119.3497       41.0600           76       197     2012      02        25        056              0.119250      -5.548187       0.000000       0.143701       0.113000       0.182600       0.066900       0.023000
54320     54320     neimenggu      119.3497       41.0600           76       197     2012      02        26        057              0.119750      -6.077454       0.000000       0.148353       0.111000   -9999.000000       0.079700   -9999.000000
54320     54320     neimenggu      119.3497       41.0600           76       197     2012      02        27        058              0.122333      -5.685608       0.000000       0.152544       0.103000       0.119100   -9999.000000   -9999.000000
54320     54320     neimenggu      119.3497       41.0600           76       197     2012      02        28        059              0.125750      -2.161346       0.000000       0.168808   -9999.000000   -9999.000000       0.063600       0.106000
54320     54320     neimenggu      119.3497       41.0600           76       197     2012      02        29        060              0.000000   -9999.000000       0.000000   -9999.000000   -9999.000000       0.115000   -9999.000000   -9999.000000
54320     54320     neimenggu      119.3497       41.0600           76       197     2012      03        01        061              0.128625       0.428009       0.000000       0.205562   -9999.000000   -9999.000000       0.069100       0.105000
54320     54320     neimenggu      119.3497       41.0600           76       197     2012      03        02        062              0.125417      -2.927338       0.000000       0.170775       0.097000   -9999.000000       0.058600       0.011000
54320     54320     neimenggu      119.3497       41.0600           76       197     2012      03        03        063              0.126292      -4.264954       0.000000       0.158779       0.101000       0.063000       0.069900   -9999.000000
54320     54320     neimenggu      119.3497       41.0600           76       197     2012      03        04        064              0.130750      -1.812225       0.000000       0.177826   -9999.000000       0.126600       0.061000       0.079000
54320     54320     neimenggu      119.3497       41.0600           76       197     2012      03        05        065              0.132500       0.478180       0.000000       0.203343   -9999.000000   -9999.000000       0.070800       0.051000
54320     54320     neimenggu      119.3497       41.0600           76       197     2012      03        06        066              0.130417      -0.038696       0.000000       0.205075       0.116000   -9999.000000       0.068100       0.014000
54320     54320     neimenggu      119.3497       41.0600           76       197     2012      03        07        067              0.000000      -2.174530       0.000000       0.185891       0.120000   -9999.000000       0.062100       0.036000
54320     54320     neimenggu      119.3497       41.0600           76       197     2012      03        08        068              0.125250      -1.401184       0.000000       0.193481       0.117000       0.036400       0.064000   -9999.000000
54320     54320     neimenggu      119.3497       41.0600           76       197     2012      03        09        069              0.125083      -4.157074       0.000000       0.163242   -9999.000000       0.189000       0.073100       0.141000
54320     54320     neimenggu      119.3497       41.0600           76       197     2012      03        10        070              0.124417      -0.902802       0.000000       0.183927   -9999.000000       0.070700       0.058400   -9999.000000
54320     54320     neimenggu      119.3497       41.0600           76       197     2012      03        11        071              0.123750      -3.775330       0.000000       0.174439       0.111000   -9999.000000       0.066200       0.096000
54320     54320     neimenggu      119.3497       41.0600           76       197     2012      03        12        072              0.125250      -3.454803       0.000000       0.169040       0.109000       0.092500       0.067400       0.031000
54320     54320     neimenggu      119.3497       41.0600           76       197     2012      03        13        073              0.129500      -0.735077       0.000000       0.192150       0.105000       0.006100       0.064700   -9999.000000
54320     54320     neimenggu      119.3497       41.0600           76       197     2012      03        14        074              0.134875       1.271484       0.645540       0.212817       0.094000       0.311100       0.075500       0.120000
54320     54320     neimenggu      119.3497       41.0600           76       197     2012      03        15        075              0.141625       2.175720       0.328942       0.221870       0.120000       0.032700   -9999.000000       0.189000
54320     54320     neimenggu      119.3497       41.0600           76       197     2012      03        16        076              0.145500       3.546295       0.000000       0.261831       0.113000   -9999.000000       0.072300       0.337000
54320     54320     neimenggu      119.3497       41.0600           76       197     2012      03        17        077              0.139375       4.498169       1.018632       0.255669       0.113000       0.149000       0.071700   -9999.000000
54320     54320     neimenggu      119.3497       41.0600           76       197     2012      03        18        078              0.131667       0.367218       0.448510       0.207225       0.120000   -9999.000000       0.070600       0.210000
54320     54320     neimenggu      119.3497       41.0600           76       197     2012      03        19        079              0.135083      -1.744202       0.000000       0.181368       0.114000       0.394000       0.066800       0.005000
54320     54320     neimenggu      119.3497       41.0600           76       197     2012      03        20        080              0.140292       1.128448       0.000000       0.209206   -9999.000000   -9999.000000       0.081200       0.059000
54320     54320     neimenggu      119.3497       41.0600           76       197     2012      03        21        081              0.144917       3.104248       0.000000       0.227638   -9999.000000       0.052400       0.072200       0.213000
54320     54320     neimenggu      119.3497       41.0600           76       197     2012      03        22        082              0.143083       4.463074       0.000000       0.254444       0.105000   -9999.000000       0.073500       0.182000
54320     54320     neimenggu      119.3497       41.0600           76       197     2012      03        23        083              0.141875       4.132233       0.000000       0.256033       0.090000       0.031500       0.074700       0.165000
54320     54320     neimenggu      119.3497       41.0600           76       197     2012      03        24        084              0.140208       2.933258       0.000000       0.239016       0.107000   -9999.000000   -9999.000000       0.022000
54320     54320     neimenggu      119.3497       41.0600           76       197     2012      03        25        085              0.000000       2.521393       0.000000       0.224053   -9999.000000   -9999.000000       0.075100       0.158000
54320     54320     neimenggu      119.3497       41.0600           76       197     2012      03        26        086              0.142208       3.426605       0.000000       0.226605   -9999.000000       0.069200       0.074200   -9999.000000
54320     54320     neimenggu      119.3497       41.0600           76       197     2012      03        27        087              0.143208       6.791351       1.872771       0.254497       0.102000       0.113000       0.067200   -9999.000000
54320     54320     neimenggu      119.3497       41.0600           76       197     2012      03        28        088              0.143667       8.601562       0.124893       0.254888       0.108000       0.060800       0.069600       0.224000
54320     54320     neimenggu      119.3497       41.0600           76       197     2012      03        29        089              0.141708      10.084442       0.069872       0.262190       0.107000   -9999.000000       0.072100       0.142000
54320     54320     neimenggu      119.3497       41.0600           76       197     2012      03        30        090              0.137208       9.683746       0.000000       0.253422       0.082000       0.122000       0.068300       0.204000
54320     54320     neimenggu      119.3497       41.0600           76       197     2012      03        31        091              0.135750       4.706696       0.000000       0.240759   -9999.000000       0.016900       0.079800       0.170000
54320     54320     neimenggu      119.3497       41.0600           76       197     2012      04        01        092              0.135500       4.123047       0.000000       0.223135       0.105000   -9999.000000       0.062700   -9999.000000
54320     54320     neimenggu      119.3497       41.0600           76       197     2012      04        02        093              0.134458       4.781860       0.000000       0.241207       0.099000       0.086000       0.067600       0.223000
54320     54320     neimenggu      119.3497       41.0600           76       197     2012      04        03        094              0.134292       3.554291       0.000000       0.225922       0.104000       0.086600       0.066600       0.213000
54320     54320     neimenggu      119.3497       41.0600           76       197     2012      04        04        095              0.134042       6.316254       0.000000       0.252961       0.090000   -9999.000000       0.071000       0.256000
54320     54320     neimenggu      119.3497       41.0600           76       197     2012      04        05        096              0.133083       7.054321       0.000000       0.249527   -9999.000000       0.022300       0.064900       0.219000
54320     54320     neimenggu      119.3497       41.0600           76       197     2012      04        06        097              0.132792       6.224152       0.000000       0.244440       0.099000   -9999.000000       0.072600   -9999.000000
54320     54320     neimenggu      119.3497       41.0600           76       197     2012      04        07        098              0.135083       6.670990       0.878636       0.247899       0.094500   -9999.000000       0.065300       0.298000
54320     54320     neimenggu      119.3497       41.0600           76       197     2012      04        08        099              0.134750      11.507965       0.000000       0.250757       0.100000       0.016000       0.063600       0.264000
54320     54320     neimenggu      119.3497       41.0600           76       197     2012      04        09        100              0.135708      11.355377       0.000000       0.245528       0.096000   -9999.000000       0.074100       0.303000
54320     54320     neimenggu      119.3497       41.0600           76       197     2012      04        10        101              0.134875      14.989716       6.431287       0.240903   -9999.000000   -9999.000000       0.084800       0.655000
54320     54320     neimenggu      119.3497       41.0600           76       197     2012      04        11        102              0.133542      12.620972       0.000000       0.269060       0.097000   -9999.000000       0.080000       0.536000
54320     54320     neimenggu      119.3497       41.0600           76       197     2012      04        12        103              0.133875      10.850189       0.416575       0.264953       0.094000       0.133200       0.087600       0.365000
54320     54320     neimenggu      119.3497       41.0600           76       197     2012      04        13        104              0.134333      13.227570       0.000000       0.257785       0.084000   -9999.000000       0.071300       0.361000
54320     54320     neimenggu      119.3497       41.0600           76       197     2012      04        14        105              0.134708      15.746552       0.000000       0.249453       0.094000   -9999.000000       0.074500       0.228000
54320     54320     neimenggu      119.3497       41.0600           76       197     2012      04        15        106              0.132292      17.362274       0.274713       0.241098   -9999.000000       0.133900       0.071800       0.215000
54320     54320     neimenggu      119.3497       41.0600           76       197     2012      04        16        107              0.133042      10.453735       0.000000       0.241006       0.091000   -9999.000000       0.071500       0.197000
54320     54320     neimenggu      119.3497       41.0600           76       197     2012      04        17        108              0.133417      13.367554       0.000000       0.237143       0.092000       0.094000   -9999.000000       0.222000
54320     54320     neimenggu      119.3497       41.0600           76       197     2012      04        18        109              0.133375      16.422699       0.000000       0.233182       0.097000       0.048300   -9999.000000       0.390000
54320     54320     neimenggu      119.3497       41.0600           76       197     2012      04        19        110              0.136250      17.312744       1.576476       0.228336       0.099000       0.095300       0.067200       0.463000
54320     54320     neimenggu      119.3497       41.0600           76       197     2012      04        20        111              0.153542      15.885345       0.699740       0.236331       0.119500   -9999.000000   -9999.000000       0.819000
54320     54320     neimenggu      119.3497       41.0600           76       197     2012      04        21        112              0.155750      12.759827       0.000000       0.250083       0.127000       0.090600       0.096400       0.791000
54320     54320     neimenggu      119.3497       41.0600           76       197     2012      04        22        113              0.160667      12.998901       0.000000       0.250504       0.110000       0.014000       0.079000       0.518000
54320     54320     neimenggu      119.3497       41.0600           76       197     2012      04        23        114              0.163042      18.403931       0.000000       0.240208       0.109500       0.051400       0.092600       0.486000
54320     54320     neimenggu      119.3497       41.0600           76       197     2012      04        24        115              0.203167      19.310608      27.013086       0.235644   -9999.000000       0.177400       0.116800       0.882000
54320     54320     neimenggu      119.3497       41.0600           76       197     2012      04        25        116              0.000000      13.288116       0.000000       0.322801       0.148000   -9999.000000       0.108400   -9999.000000
54320     54320     neimenggu      119.3497       41.0600           76       197     2012      04        26        117              0.224458      11.291534       0.064429       0.308702       0.131000       0.029200       0.090200       0.750000
54320     54320     neimenggu      119.3497       41.0600           76       197     2012      04        27        118              0.208792      14.725067       0.000000       0.291782       0.112000   -9999.000000   -9999.000000       0.474000
54320     54320     neimenggu      119.3497       41.0600           76       197     2012      04        28        119              0.200708      12.450439       0.000000       0.280617       0.105500       0.124900       0.084700       0.469000
54320     54320     neimenggu      119.3497       41.0600           76       197     2012      04        29        120              0.199083      12.501312       0.000000       0.273426       0.091000   -9999.000000       0.090200       0.460000
54320     54320     neimenggu      119.3497       41.0600           76       197     2012      04        30        121              0.197583      16.598663       0.000000       0.266410       0.101000   -9999.000000       0.075500   -9999.000000
54320     54320     neimenggu      119.3497       41.0600           76       197     2012      05        01        122              0.196208      18.720428       0.120195       0.261908       0.118000       0.040200       0.073400       0.457000
54320     54320     neimenggu      119.3497       41.0600           76       197     2012      05        02        123              0.194042      18.814911       0.000000       0.254677       0.110000       0.158600       0.079300       0.397000
54320     54320     neimenggu      119.3497       41.0600           76       197     2012      05        03        124              0.193042      19.627411       0.000000       0.247774       0.102000       0.062600       0.075600       0.448000
54320     54320     neimenggu      119.3497       41.0600           76       197     2012      05        04        125              0.189917      22.203064       0.725346       0.237804       0.103000   -9999.000000       0.076000       0.372000
54320     54320     neimenggu      119.3497       41.0600           76       197     2012      05        05        126              0.185833      19.845947       0.000000       0.236651       0.106000       0.132500       0.066700   -9999.000000
54320     54320     neimenggu      119.3497       41.0600           76       197     2012      05        06        127              0.182542      18.996063       0.000000       0.227139       0.103000       0.084000       0.068000       0.431000
54320     54320     neimenggu      119.3497       41.0600           76       197     2012      05        07        128              0.177667      19.298370       0.000000       0.218881   -9999.000000       0.252600       0.074300       0.363000
54320     54320     neimenggu      119.3497       41.0600           76       197     2012      05        08        129              0.175417      16.398102       0.000000       0.219613       0.096500       0.125800       0.073600       0.387000
54320     54320     neimenggu      119.3497       41.0600           76       197     2012      05        09        130              0.172417      18.725555       0.000000       0.213252       0.099000       0.117100       0.078300       0.408000
54320     54320     neimenggu      119.3497       41.0600           76       197     2012      05        10        131              0.168208      21.691254       0.183038       0.207330       0.098000       0.039700       0.083700       0.324000
54320     54320     neimenggu      119.3497       41.0600           76       197     2012      05        11        132              0.163375      23.283936       1.118753       0.202263       0.169000       0.059200       0.083600       0.509000
54320     54320     neimenggu      119.3497       41.0600           76       197     2012      05        12        133              0.165417      16.279480       0.610048       0.222091       0.170000   -9999.000000       0.089000       0.459000
54320     54320     neimenggu      119.3497       41.0600           76       197     2012      05        13        134              0.166833      14.418976       0.862054       0.235518       0.155500   -9999.000000       0.074100       0.451000
54320     54320     neimenggu      119.3497       41.0600           76       197     2012      05        14        135              0.165708      17.103455       0.000000       0.232743       0.130000   -9999.000000       0.086900       0.281000
54320     54320     neimenggu      119.3497       41.0600           76       197     2012      05        15        136              0.163000      15.893311       0.592073       0.223143       0.129000       0.141800       0.091200       0.262000
54320     54320     neimenggu      119.3497       41.0600           76       197     2012      05        16        137              0.161042      15.653717       0.904113       0.216225       0.187000       0.153900       0.114000       0.619000
54320     54320     neimenggu      119.3497       41.0600           76       197     2012      05        17        138              0.163667      15.011780       0.080379       0.224241       0.139000       0.233600       0.081100       0.392000
54320     54320     neimenggu      119.3497       41.0600           76       197     2012      05        18        139              0.161667      21.140442       0.000000       0.214735       0.131000   -9999.000000       0.086000       0.462000
54320     54320     neimenggu      119.3497       41.0600           76       197     2012      05        19        140              0.169208      24.129272      15.985137       0.200899       0.139500       0.056100   -9999.000000       0.976000
54320     54320     neimenggu      119.3497       41.0600           76       197     2012      05        20        141              0.182708      21.796783       0.000000       0.274542       0.142000       0.368300       0.110600       0.904000
54320     54320     neimenggu      119.3497       41.0600           76       197     2012      05        21        142              0.177500      20.756866       0.331296       0.275936       0.161000       0.357500       0.106900       0.469000
54320     54320     neimenggu      119.3497       41.0600           76       197     2012      05        22        143              0.170792      22.213623       4.923686       0.256975       0.194000   -9999.000000       0.105200       0.551000
54320     54320     neimenggu      119.3497       41.0600           76       197     2012      05        23        144              0.165792      18.527832       0.000000       0.274976   -9999.000000       0.127700       0.098900       0.413000
54320     54320     neimenggu      119.3497       41.0600           76       197     2012      05        24        145              0.159833      19.043121       0.000000       0.263528       0.144000       0.173900       0.091100   -9999.000000
54320     54320     neimenggu      119.3497       41.0600           76       197     2012      05        25        146              0.000000      18.069611       0.000000       0.248323       0.149000       0.214000       0.095200       0.361000
54320     54320     neimenggu      119.3497       41.0600           76       197     2012      05        26        147              0.152333      20.778564       0.060915       0.235120       0.150000       0.183600       0.100000       0.282000
54320     54320     neimenggu      119.3497       41.0600           76       197     2012      05        27        148              0.149708      22.037659       0.000000       0.223082       0.126500       0.108000       0.107600       0.353000
54320     54320     neimenggu      119.3497       41.0600           76       197     2012      05        28        149              0.148417      22.457428       0.285750       0.212788       0.142000       0.192400       0.086900       0.393000
54320     54320     neimenggu      119.3497       41.0600           76       197     2012      05        29        150              0.162708      26.428497      11.414862       0.202174       0.184000       0.203700       0.087900   -9999.000000
54320     54320     neimenggu      119.3497       41.0600           76       197     2012      05        30        151              0.221500      21.230774       0.839962       0.255751       0.150000   -9999.000000       0.095900   -9999.000000
54320     54320     neimenggu      119.3497       41.0600           76       197     2012      05        31        152              0.214333      17.825378       0.396594       0.271575       0.145000       0.105600   -9999.000000   -9999.000000
54320     54320     neimenggu      119.3497       41.0600           76       197     2012      06        01        153              0.204167      20.448914       0.472921       0.252906       0.166500       0.221400       0.107600       0.420000
54320     54320     neimenggu      119.3497       41.0600           76       197     2012      06        02        154              0.195125      18.672119       1.529259       0.254838       0.177000   -9999.000000   -9999.000000       0.398000
54320     54320     neimenggu      119.3497       41.0600           76       197     2012      06        03        155              0.225208      19.966248      25.772850       0.243670       0.247000       0.073600       0.133400   -9999.000000
54320     54320     neimenggu      119.3497       41.0600           76       197     2012      06        04        156              0.217083      16.646942       1.895805       0.346842       0.194500       0.303400       0.121200       0.790000
54320     54320     neimenggu      119.3497       41.0600           76       197     2012      06        05        157              0.208292      20.364227       0.086361       0.306236       0.172000   -9999.000000       0.129200       0.480000
54320     54320     neimenggu      119.3497       41.0600           76       197     2012      06        06        158              0.202042      22.225525       9.260827       0.288691       0.183500       0.141600       0.136600       0.565000
54320     54320     neimenggu      119.3497       41.0600           76       197     2012      06        07        159              0.194417      20.953979       3.851751       0.311151       0.222000       0.185400       0.137700       0.609000
54320     54320     neimenggu      119.3497       41.0600           76       197     2012      06        08        160              0.218458      23.337311       3.007005       0.305132       0.215000       0.159600       0.110400       0.627000
54320     54320     neimenggu      119.3497       41.0600           76       197     2012      06        09        161              0.247250      23.671448       8.790445       0.299602       0.187500   -9999.000000       0.050700       0.578000
54320     54320     neimenggu      119.3497       41.0600           76       197     2012      06        10        162              0.231542      22.176483       0.771762       0.314443       0.148000       0.218700       0.122100       0.568000
54320     54320     neimenggu      119.3497       41.0600           76       197     2012      06        11        163              0.000000      19.560913       0.311936       0.298468       0.171000       0.285900       0.152500       0.598000
54320     54320     neimenggu      119.3497       41.0600           76       197     2012      06        12        164              0.211292      20.027008       0.000000       0.288133       0.180000       0.382700       0.140300       0.471000
54320     54320     neimenggu      119.3497       41.0600           76       197     2012      06        13        165              0.237083      19.387573      29.024282       0.280756   -9999.000000       0.204100       0.202200       0.370000
54320     54320     neimenggu      119.3497       41.0600           76       197     2012      06        14        166              0.304708      17.381409      37.704075       0.331527       0.229000       0.149800       0.173000       1.000000
54320     54320     neimenggu      119.3497       41.0600           76       197     2012      06        15        167              0.286333      15.801880       0.125743       0.369621       0.231000       0.215400       0.158300       0.779000
54320     54320     neimenggu      119.3497       41.0600           76       197     2012      06        16        168              0.264250      17.196625       0.576986       0.337337       0.170000       0.399200       0.133600       0.790000
54320     54320     neimenggu      119.3497       41.0600           76       197     2012      06        17        169              0.251750      22.435760       1.803383       0.323071       0.172000       0.379800       0.167600       0.878000
54320     54320     neimenggu      119.3497       41.0600           76       197     2012      06        18        170              0.244125      23.503693       1.067029       0.317755   -9999.000000       0.103600       0.133000       0.839000
54320     54320     neimenggu      119.3497       41.0600           76       197     2012      06        19        171              0.237542      23.700012       0.000000       0.312027       0.179500       0.104200       0.108900   -9999.000000
54320     54320     neimenggu      119.3497       41.0600           76       197     2012      06        20        172              0.274708      23.884918       1.470456       0.305202       0.166500       0.230600       0.109800       0.662000
54320     54320     neimenggu      119.3497       41.0600           76       197     2012      06        21        173              0.277083      23.812714       0.816636       0.299431   -9999.000000   -9999.000000       0.105900       0.772000
54320     54320     neimenggu      119.3497       41.0600           76       197     2012      06        22        174              0.271708      24.118591       0.079713       0.297550       0.193000       0.169600       0.116500   -9999.000000
54320     54320     neimenggu      119.3497       41.0600           76       197     2012      06        23        175              0.256500      22.728821       0.227360       0.294518       0.226000   -9999.000000       0.106100       0.712000
54320     54320     neimenggu      119.3497       41.0600           76       197     2012      06        24        176              0.246167      23.992340       1.008690       0.288835       0.185500       0.119100       0.114400       0.834000
54320     54320     neimenggu      119.3497       41.0600           76       197     2012      06        25        177              0.245792      24.107025       5.968384       0.288118       0.210000       0.184600       0.154200       1.000000
54320     54320     neimenggu      119.3497       41.0600           76       197     2012      06        26        178              0.242000      22.172119       0.188998       0.310177       0.169000       0.146700       0.143600       0.682000
54320     54320     neimenggu      119.3497       41.0600           76       197     2012      06        27        179              0.235708      24.559845       0.116712       0.291712       0.161000   -9999.000000       0.138400   -9999.000000
54320     54320     neimenggu      119.3497       41.0600           76       197     2012      06        28        180              0.228833      24.670532       8.268260       0.281148   -9999.000000       0.118800       0.166600       0.631000
54320     54320     neimenggu      119.3497       41.0600           76       197     2012      06        29        181              0.239292      21.289764       6.682028       0.294580       0.219000       0.350200       0.168600   -9999.000000
54320     54320     neimenggu      119.3497       41.0600           76       197     2012      06        30        182              0.233458      21.443817       0.000000       0.325021       0.172500       0.249900       0.151700   -9999.000000
54320     54320     neimenggu      119.3497       41.0600           76       197     2012      07        01        183              0.223250      25.508392       0.767834       0.299790       0.164000       0.301200       0.138100       0.723000
54320     54320     neimenggu      119.3497       41.0600           76       197     2012      07        02        184              0.214042      25.002960       0.000000       0.289439       0.169000       0.144300       0.112200   -9999.000000
54320     54320     neimenggu      119.3497       41.0600           76       197     2012      07        03        185              0.203792      24.530243       0.000000       0.280037       0.201000       0.079900       0.109200       0.662000
54320     54320     neimenggu      119.3497       41.0600           76       197     2012      07        04        186              0.194125      24.588776       0.538046       0.272147       0.196000       0.011500       0.120200       0.836000
54320     54320     neimenggu      119.3497       41.0600           76       197     2012      07        05        187              0.184917      25.224823       0.463370       0.267956       0.182000   -9999.000000       0.131300       0.728000
54320     54320     neimenggu      119.3497       41.0600           76       197     2012      07        06        188              0.178708      23.935730       0.353049       0.264745   -9999.000000   -9999.000000       0.112000       0.652000
54320     54320     neimenggu      119.3497       41.0600           76       197     2012      07        07        189              0.174083      26.137146       0.217682       0.257102   -9999.000000       0.192600       0.117700       0.548000
54320     54320     neimenggu      119.3497       41.0600           76       197     2012      07        08        190              0.170750      26.712738       1.897501       0.253018       0.174000   -9999.000000       0.111500       0.688000
54320     54320     neimenggu      119.3497       41.0600           76       197     2012      07        09        191              0.167958      27.060181       4.318430       0.250477       0.265000       0.271400       0.126900       0.670000
54320     54320     neimenggu      119.3497       41.0600           76       197     2012      07        10        192              0.180167      25.242432       4.860710       0.270845       0.233000       0.211400       0.122600       0.976000
54320     54320     neimenggu      119.3497       41.0600           76       197     2012      07        11        193              0.191619      22.843750       0.987244       0.294753       0.233500   -9999.000000       0.129100       0.733000
54320     54320     neimenggu      119.3497       41.0600           76       197     2012      07        12        194              0.194292      23.412781       0.721557       0.281406       0.237000       0.235900       0.112300       0.482000
54320     54320     neimenggu      119.3497       41.0600           76       197     2012      07        13        195              0.196625      22.560822       0.000000       0.276346       0.230500       0.162400       0.117300       0.545000
54320     54320     neimenggu      119.3497       41.0600           76       197     2012      07        14        196              0.187125      22.708740       0.000000       0.265841       0.244000       0.208300       0.110200       0.663000
54320     54320     neimenggu      119.3497       41.0600           76       197     2012      07        15        197              0.178542      22.909454       0.000000       0.256405   -9999.000000       0.283400       0.103900       0.624000
54320     54320     neimenggu      119.3497       41.0600           76       197     2012      07        16        198              0.171167      24.857269       0.000000       0.246566       0.217000       0.110500       0.145500       0.455000
54320     54320     neimenggu      119.3497       41.0600           76       197     2012      07        17        199              0.166417      26.456055       0.000000       0.235607       0.205000       0.121200       0.141200       0.508000
54320     54320     neimenggu      119.3497       41.0600           76       197     2012      07        18        200              0.163292      27.156952       0.000000       0.226666       0.217000       0.199200       0.137000       0.432000
54320     54320     neimenggu      119.3497       41.0600           76       197     2012      07        19        201              0.161583      27.499847       0.000000       0.217657       0.202000       0.025500       0.133900       0.608000
54320     54320     neimenggu      119.3497       41.0600           76       197     2012      07        20        202              0.159708      28.358612       0.169221       0.208119       0.215000       0.112400   -9999.000000       0.575000
54320     54320     neimenggu      119.3497       41.0600           76       197     2012      07        21        203              0.194292      29.242249      78.442612       0.199626       0.271000       0.085800       0.086100   -9999.000000
54320     54320     neimenggu      119.3497       41.0600           76       197     2012      07        22        204              0.317542      26.303558      16.712854       0.285431       0.336000   -9999.000000       0.160200       1.000000
54320     54320     neimenggu      119.3497       41.0600           76       197     2012      07        23        205              0.275083      23.733337       0.204068       0.359218       0.294000   -9999.000000       0.170000       0.806000
54320     54320     neimenggu      119.3497       41.0600           76       197     2012      07        24        206              0.256292      25.749908       1.288526       0.330474       0.298500       0.110500       0.165300       0.808000
54320     54320     neimenggu      119.3497       41.0600           76       197     2012      07        25        207              0.245917      24.046722       6.976384       0.320621   -9999.000000   -9999.000000       0.170400       0.916000
54320     54320     neimenggu      119.3497       41.0600           76       197     2012      07        26        208              0.237083      24.963745       1.445781       0.325286       0.325000   -9999.000000       0.164400   -9999.000000
54320     54320     neimenggu      119.3497       41.0600           76       197     2012      07        27        209              0.226792      24.774200       2.297039       0.324946       0.296500   -9999.000000       0.127900       0.845000
54320     54320     neimenggu      119.3497       41.0600           76       197     2012      07        28        210              0.236250      26.496948      13.529087       0.312808   -9999.000000       0.216700       0.183300       0.839000
54320     54320     neimenggu      119.3497       41.0600           76       197     2012      07        29        211              0.238792      25.185059       0.000000       0.342155       0.295000   -9999.000000       0.167600       0.859000
54320     54320     neimenggu      119.3497       41.0600           76       197     2012      07        30        212              0.228458      25.429443       3.638832       0.317597   -9999.000000       0.522400       0.099800       0.921000
54320     54320     neimenggu      119.3497       41.0600           76       197     2012      07        31        213              0.234125      24.283234      15.086603       0.315666       0.348000       0.214800       0.116100   -9999.000000
54320     54320     neimenggu      119.3497       41.0600           76       197     2012      08        01        214              0.275333      21.065125      66.501740       0.344281   -9999.000000       0.330800       0.104100       1.000000
54320     54320     neimenggu      119.3497       41.0600           76       197     2012      08        02        215              0.296958      19.983490       0.095779       0.382272       0.358000   -9999.000000       0.110500       0.834000
54320     54320     neimenggu      119.3497       41.0600           76       197     2012      08        03        216              0.271708      21.977356      12.266634       0.349549   -9999.000000   -9999.000000       0.077500       0.932000
54320     54320     neimenggu      119.3497       41.0600           76       197     2012      08        04        217              0.264875      22.642242       1.874214       0.343334       0.346500   -9999.000000       0.109200       0.963000
54320     54320     neimenggu      119.3497       41.0600           76       197     2012      08        05        218              0.256417      21.782501       0.000000       0.346387       0.404000       0.168600       0.104400       0.932000
54320     54320     neimenggu      119.3497       41.0600           76       197     2012      08        06        219              0.248375      23.883362       0.071021       0.330046       0.338000   -9999.000000       0.187100       0.816000
54320     54320     neimenggu      119.3497       41.0600           76       197     2012      08        07        220              0.237667      25.518494       0.000000       0.320845       0.324000   -9999.000000   -9999.000000       0.728000
54320     54320     neimenggu      119.3497       41.0600           76       197     2012      08        08        221              0.229292      26.987885       0.389761       0.313628       0.300000       0.076600       0.188300       0.809000
54320     54320     neimenggu      119.3497       41.0600           76       197     2012      08        09        222              0.221042      25.033661       2.027792       0.312134       0.305500   -9999.000000       0.166500       0.764000
54320     54320     neimenggu      119.3497       41.0600           76       197     2012      08        10        223              0.209375      25.679596       0.020845       0.310814       0.329000       0.351000       0.168600       0.704000
54320     54320     neimenggu      119.3497       41.0600           76       197     2012      08        11        224              0.203333      26.104675       0.420352       0.305084       0.258000       0.020500       0.164400       0.696000
54320     54320     neimenggu      119.3497       41.0600           76       197     2012      08        12        225              0.199292      23.733154       0.000000       0.305164       0.280000   -9999.000000       0.176800       0.586000
54320     54320     neimenggu      119.3497       41.0600           76       197     2012      08        13        226              0.199250      20.468109       0.000000       0.303935       0.256000       0.180300       0.187900       0.575000
54320     54320     neimenggu      119.3497       41.0600           76       197     2012      08        14        227              0.196542      21.769714       0.148881       0.298286       0.274000       0.337700       0.191900       0.481000
54320     54320     neimenggu      119.3497       41.0600           76       197     2012      08        15        228              0.194292      21.401947       0.000000       0.295878       0.262500       0.148800       0.172900       0.606000
54320     54320     neimenggu      119.3497       41.0600           76       197     2012      08        16        229              0.189042      22.595764       0.000000       0.292320       0.287000   -9999.000000       0.173100       0.618000
54320     54320     neimenggu      119.3497       41.0600           76       197     2012      08        17        230              0.183583      24.315552       0.114477       0.288040       0.249000       0.238200       0.173300       0.530000
54320     54320     neimenggu      119.3497       41.0600           76       197     2012      08        18        231              0.179292      24.511688       8.320637       0.284874       0.281500   -9999.000000       0.188800       0.767000
54320     54320     neimenggu      119.3497       41.0600           76       197     2012      08        19        232              0.176875      24.021149       0.000000       0.310807       0.259000       0.099000       0.210200   -9999.000000
54320     54320     neimenggu      119.3497       41.0600           76       197     2012      08        20        233              0.175000      24.423492       0.917988       0.300889       0.289000   -9999.000000   -9999.000000       0.722000
54320     54320     neimenggu      119.3497       41.0600           76       197     2012      08        21        234              0.172792      23.270966       1.456350       0.296088       0.458000   -9999.000000       0.206500       0.442000
54320     54320     neimenggu      119.3497       41.0600           76       197     2012      08        22        235              0.172708      19.298676       0.000000       0.292778       0.381000   -9999.000000       0.205200   -9999.000000
54320     54320     neimenggu      119.3497       41.0600           76       197     2012      08        23        236              0.171125      19.380188       0.000000       0.288411       0.319000       0.135200       0.225500       0.488000
54320     54320     neimenggu      119.3497       41.0600           76       197     2012      08        24        237              0.168417      21.892365       0.000000       0.284524       0.277000       0.095300       0.204700   -9999.000000
54320     54320     neimenggu      119.3497       41.0600           76       197     2012      08        25        238              0.000000      22.211517       2.434096       0.280113       0.342000   -9999.000000       0.235000   -9999.000000
54320     54320     neimenggu      119.3497       41.0600           76       197     2012      08        26        239              0.163375      22.515656       0.000000       0.276908       0.354000       0.038000       0.203000       0.482000
54320     54320     neimenggu      119.3497       41.0600           76       197     2012      08        27        240              0.162375      23.029480       0.197007       0.276804       0.380000       0.199700       0.184300       0.685000
54320     54320     neimenggu      119.3497       41.0600           76       197     2012      08        28        241              0.161250      23.633820       0.617710       0.278584       0.333000   -9999.000000       0.172600       0.522000
54320     54320     neimenggu      119.3497       41.0600           76       197     2012      08        29        242              0.160750      23.482025       1.031479       0.277788       0.312000       0.065200       0.176100   -9999.000000
54320     54320     neimenggu      119.3497       41.0600           76       197     2012      08        30        243              0.159458      24.408173       0.000000       0.274390       0.331000   -9999.000000       0.187600       0.536000
54320     54320     neimenggu      119.3497       41.0600           76       197     2012      08        31        244              0.157917      25.111786       0.000000       0.269915       0.332500       0.126800       0.197100       0.543000
54320     54320     neimenggu      119.3497       41.0600           76       197     2012      09        01        245              0.157958      25.388763       0.727191       0.266814       0.288000       0.175800       0.169100       0.520000
54320     54320     neimenggu      119.3497       41.0600           76       197     2012      09        02        246              0.196208      25.738373      23.147381       0.266412       0.313000       0.138500       0.196300       0.919000
54320     54320     neimenggu      119.3497       41.0600           76       197     2012      09        03        247              0.220417      19.762939       0.132576       0.332081       0.288500   -9999.000000       0.168800       0.867000
54320     54320     neimenggu      119.3497       41.0600           76       197     2012      09        04        248              0.214792      16.403961       0.000000       0.317017       0.226000       0.147500       0.164000       0.662000
54320     54320     neimenggu      119.3497       41.0600           76       197     2012      09        05        249              0.209667      16.735077       0.263431       0.306774       0.231000       0.189200       0.166800       0.569000
54320     54320     neimenggu      119.3497       41.0600           76       197     2012      09        06        250              0.203625      19.258118       0.515835       0.300935       0.280000       0.166000       0.147100       0.623000
54320     54320     neimenggu      119.3497       41.0600           76       197     2012      09        07        251              0.199250      20.472321      15.344824       0.295854       0.284000   -9999.000000       0.164000       0.876000
54320     54320     neimenggu      119.3497       41.0600           76       197     2012      09        08        252              0.196958      18.480560       0.000000       0.336024       0.269000   -9999.000000       0.160200       0.807000
54320     54320     neimenggu      119.3497       41.0600           76       197     2012      09        09        253              0.192875      19.473022       0.000000       0.317265       0.263000       0.386200       0.170600       0.722000
54320     54320     neimenggu      119.3497       41.0600           76       197     2012      09        10        254              0.187458      21.403137       0.492543       0.308787       0.247000       0.272900       0.130000       0.563000
54320     54320     neimenggu      119.3497       41.0600           76       197     2012      09        11        255              0.184333      22.147400       9.441373       0.302786       0.220500       0.227000       0.153800       0.796000
54320     54320     neimenggu      119.3497       41.0600           76       197     2012      09        12        256              0.203667      19.822174       0.292074       0.320892       0.252000   -9999.000000       0.142100       0.743000
54320     54320     neimenggu      119.3497       41.0600           76       197     2012      09        13        257              0.198208      15.454651       0.000000       0.318850       0.240000       0.222200       0.141200       0.692000
54320     54320     neimenggu      119.3497       41.0600           76       197     2012      09        14        258              0.193458      14.989410       0.000000       0.309186       0.235500       0.363700       0.140700       0.634000
54320     54320     neimenggu      119.3497       41.0600           76       197     2012      09        15        259              0.188875      16.202026       0.000000       0.304264   -9999.000000       0.125800       0.134900       0.484000
54320     54320     neimenggu      119.3497       41.0600           76       197     2012      09        16        260              0.184333      16.024200       0.000000       0.300488       0.244500       0.136700       0.148600       0.530000
54320     54320     neimenggu      119.3497       41.0600           76       197     2012      09        17        261              0.178917      16.413635       0.000000       0.297151       0.278000       0.185400       0.193500   -9999.000000
54320     54320     neimenggu      119.3497       41.0600           76       197     2012      09        18        262              0.174417      15.720642       0.000000       0.293244       0.237000       0.149700       0.166100       0.518000
54320     54320     neimenggu      119.3497       41.0600           76       197     2012      09        19        263              0.170792      16.394104       0.000000       0.290922       0.228000       0.148800       0.174300       0.483000
54320     54320     neimenggu      119.3497       41.0600           76       197     2012      09        20        264              0.167458      17.382690       0.000000       0.289504       0.205000   -9999.000000       0.171900       0.543000
54320     54320     neimenggu      119.3497       41.0600           76       197     2012      09        21        265              0.164333      18.800262       0.000000       0.287170   -9999.000000   -9999.000000       0.172900       0.490000
54320     54320     neimenggu      119.3497       41.0600           76       197     2012      09        22        266              0.163125      18.098389       0.906129       0.286266       0.180000   -9999.000000       0.182900   -9999.000000
54320     54320     neimenggu      119.3497       41.0600           76       197     2012      09        23        267              0.162458      17.944305       2.062234       0.289303       0.185000       0.335600       0.156100       0.555000
54320     54320     neimenggu      119.3497       41.0600           76       197     2012      09        24        268              0.161167      17.974762       0.000000       0.295036       0.178500       0.257000       0.173800       0.544000
54320     54320     neimenggu      119.3497       41.0600           76       197     2012      09        25        269              0.158708      18.167175       1.269622       0.290586       0.191500       0.230300       0.172300       0.548000
54320     54320     neimenggu      119.3497       41.0600           76       197     2012      09        26        270              0.158292      17.065948       0.000000       0.292890       0.185000   -9999.000000       0.189700       0.433000
54320     54320     neimenggu      119.3497       41.0600           76       197     2012      09        27        271              0.162357      16.672028       7.716816       0.289663       0.195000       0.359300       0.186100   -9999.000000
54320     54320     neimenggu      119.3497       41.0600           76       197     2012      09        28        272              0.190933      13.728729       0.065747       0.313104       0.256000   -9999.000000       0.204000       0.659000
54320     54320     neimenggu      119.3497       41.0600           76       197     2012      09        29        273              0.191500      10.517426       0.000000       0.304607       0.199500   -9999.000000       0.179100       0.479000
54320     54320     neimenggu      119.3497       41.0600           76       197     2012      09        30        274              0.189292      11.795715       0.000000       0.297956       0.196500   -9999.000000       0.183800       0.644000
54320     54320     neimenggu      119.3497       41.0600           76       197     2012      10        01        275              0.186750      12.648132       0.000000       0.295511       0.144000   -9999.000000       0.146400       0.527000
54320     54320     neimenggu      119.3497       41.0600           76       197     2012      10        02        276              0.183083      14.628967       0.000000       0.292911       0.163000       0.121400       0.133400       0.569000
54320     54320     neimenggu      119.3497       41.0600           76       197     2012      10        03        277              0.178750      16.287292       0.000000       0.290332       0.177000       0.163000       0.158300       0.531000
54320     54320     neimenggu      119.3497       41.0600           76       197     2012      10        04        278              0.175083      14.145081       0.000000       0.289077       0.173000       0.063000       0.159400       0.497000
54320     54320     neimenggu      119.3497       41.0600           76       197     2012      10        05        279              0.172000      14.099915       0.000000       0.287210       0.169000       0.077400       0.139500       0.479000
54320     54320     neimenggu      119.3497       41.0600           76       197     2012      10        06        280              0.169792      13.585999       0.000000       0.285961       0.172000       0.093400       0.150000       0.385000
54320     54320     neimenggu      119.3497       41.0600           76       197     2012      10        07        281              0.167833      13.885559       0.000000       0.284942       0.173000       0.062300   -9999.000000       0.425000
54320     54320     neimenggu      119.3497       41.0600           76       197     2012      10        08        282              0.165875      14.945740       1.042483       0.283973       0.168500       0.202200       0.123800       0.457000
54320     54320     neimenggu      119.3497       41.0600           76       197     2012      10        09        283              0.187208      15.952789       8.960367       0.287514       0.211000   -9999.000000       0.165600       0.649000
54320     54320     neimenggu      119.3497       41.0600           76       197     2012      10        10        284              0.187667      11.987244       0.000000       0.318294       0.194000       0.121800       0.141600       0.478000
54320     54320     neimenggu      119.3497       41.0600           76       197     2012      10        11        285              0.185042      10.897034       0.000000       0.301770       0.152500       0.174900       0.142300       0.477000
54320     54320     neimenggu      119.3497       41.0600           76       197     2012      10        12        286              0.183083      12.097412       0.000000       0.297265       0.157000       0.259500       0.142800       0.516000
54320     54320     neimenggu      119.3497       41.0600           76       197     2012      10        13        287              0.178625      13.628510       0.000000       0.294723       0.134000       0.265200       0.140400       0.371000
54320     54320     neimenggu      119.3497       41.0600           76       197     2012      10        14        288              0.181958       9.818665       0.441575       0.291309       0.166000   -9999.000000       0.146900       0.418000
54320     54320     neimenggu      119.3497       41.0600           76       197     2012      10        15        289              0.178000       9.225372       0.208356       0.289999       0.150000       0.130400       0.126000       0.448000
54320     54320     neimenggu      119.3497       41.0600           76       197     2012      10        16        290              0.177542      11.138855       7.583331       0.290275   -9999.000000       0.155700       0.120800   -9999.000000
54320     54320     neimenggu      119.3497       41.0600           76       197     2012      10        17        291              0.178042       7.672943       1.159498       0.316564       0.161000       0.083800       0.134800       0.666000
54320     54320     neimenggu      119.3497       41.0600           76       197     2012      10        18        292              0.184417       6.640778       0.881081       0.303328       0.170000       0.148100       0.121300       0.429000
54320     54320     neimenggu      119.3497       41.0600           76       197     2012      10        19        293              0.182208       7.489014       0.000000       0.302516       0.161000   -9999.000000       0.108300       0.554000
54320     54320     neimenggu      119.3497       41.0600           76       197     2012      10        20        294              0.180000       9.338440       0.000000       0.298806       0.152000   -9999.000000       0.128100       0.381000
54320     54320     neimenggu      119.3497       41.0600           76       197     2012      10        21        295              0.195917       8.070892      16.564947       0.296568       0.140000   -9999.000000       0.121100   -9999.000000
54320     54320     neimenggu      119.3497       41.0600           76       197     2012      10        22        296              0.217583       6.301666       2.285149       0.319143   -9999.000000   -9999.000000       0.131600       0.710000
54320     54320     neimenggu      119.3497       41.0600           76       197     2012      10        23        297              0.215833       4.702118       1.460381       0.338833   -9999.000000       0.047300       0.129300       0.654000
54320     54320     neimenggu      119.3497       41.0600           76       197     2012      10        24        298              0.211917       7.918549       0.000000       0.324296   -9999.000000       0.254900       0.114200       0.833000
54320     54320     neimenggu      119.3497       41.0600           76       197     2012      10        25        299              0.000000       8.975922       0.000000       0.316172       0.159000       0.141200       0.107200       0.521000
54320     54320     neimenggu      119.3497       41.0600           76       197     2012      10        26        300              0.208167       9.895172      17.468035       0.312237       0.150000       0.149400       0.128600   -9999.000000
54320     54320     neimenggu      119.3497       41.0600           76       197     2012      10        27        301              0.209958      11.179077       0.589892       0.326971       0.147000   -9999.000000       0.119200       0.710000
54320     54320     neimenggu      119.3497       41.0600           76       197     2012      10        28        302              0.000000       9.464050       0.000000       0.332899       0.129000       0.057800       0.118400       0.524000
54320     54320     neimenggu      119.3497       41.0600           76       197     2012      10        29        303              0.204250       5.756134       0.462131       0.320618       0.151000       0.371100       0.101000       0.604000
54320     54320     neimenggu      119.3497       41.0600           76       197     2012      10        30        304              0.202125       3.237000       0.352090       0.288974   -9999.000000       0.294700       0.087700       0.422000
54320     54320     neimenggu      119.3497       41.0600           76       197     2012      10        31        305              0.202042       2.620178       0.000000       0.288401   -9999.000000       0.239700       0.099100       0.450000
54320     54320     neimenggu      119.3497       41.0600           76       197     2012      11        01        306              0.208625       2.285736       0.000000       0.278449       0.130000   -9999.000000       0.103000       0.448000
54320     54320     neimenggu      119.3497       41.0600           76       197     2012      11        02        307              0.202667       3.164459       0.000000       0.296081       0.132000       0.106400       0.093400       0.466000
54320     54320     neimenggu      119.3497       41.0600           76       197     2012      11        03        308              0.214292       4.447266       9.681149       0.307548       0.133000       0.184700       0.098000       0.428000
54320     54320     neimenggu      119.3497       41.0600           76       197     2012      11        04        309              0.229792       6.798553       2.288086       0.326528   -9999.000000       0.087200       0.102700       0.665000
54320     54320     neimenggu      119.3497       41.0600           76       197     2012      11        05        310              0.227458       1.287262       0.263233       0.289961   -9999.000000   -9999.000000       0.066400       0.571000
54320     54320     neimenggu      119.3497       41.0600           76       197     2012      11        06        311              0.236542      -0.676331       0.448233       0.221370       0.137000   -9999.000000       0.070800       0.769000
54320     54320     neimenggu      119.3497       41.0600           76       197     2012      11        07        312              0.238000      -1.007355       0.572380       0.193308       0.146000   -9999.000000       0.071400       0.606000
54320     54320     neimenggu      119.3497       41.0600           76       197     2012      11        08        313              0.236750       0.063141       0.221450       0.221438       0.137000   -9999.000000   -9999.000000       0.552000
54320     54320     neimenggu      119.3497       41.0600           76       197     2012      11        09        314              0.235792       0.072113       0.000000       0.221307       0.136000       0.129100       0.075400       0.598000
54320     54320     neimenggu      119.3497       41.0600           76       197     2012      11        10        315              0.236500       0.587250       1.234393       0.233151   -9999.000000       0.074200       0.062800       0.602000
54320     54320     neimenggu      119.3497       41.0600           76       197     2012      11        11        316              0.238833       0.573822       0.000000       0.234825   -9999.000000   -9999.000000       0.054500       0.442000
54320     54320     neimenggu      119.3497       41.0600           76       197     2012      11        12        317              0.236500      -0.938354       0.000000       0.187370   -9999.000000       0.078200       0.041500       0.387000
54320     54320     neimenggu      119.3497       41.0600           76       197     2012      11        13        318              0.000000      -2.633972       0.000000       0.164929   -9999.000000   -9999.000000       0.040400       0.511000
54320     54320     neimenggu      119.3497       41.0600           76       197     2012      11        14        319              0.223042      -3.881104       0.000000       0.154940   -9999.000000   -9999.000000       0.044000   -9999.000000
54320     54320     neimenggu      119.3497       41.0600           76       197     2012      11        15        320              0.219042      -4.345276       0.000000       0.151594   -9999.000000       0.097600       0.047400       0.632000
54320     54320     neimenggu      119.3497       41.0600           76       197     2012      11        16        321              0.218714      -1.227692       0.000000       0.168977   -9999.000000       0.284700       0.032400       0.562000
54320     54320     neimenggu      119.3497       41.0600           76       197     2012      11        17        322              0.000000      -2.518311       0.000000       0.171743   -9999.000000       0.124400       0.042500       0.580000
54320     54320     neimenggu      119.3497       41.0600           76       197     2012      11        18        323              0.215208      -3.332886       0.000000       0.158964   -9999.000000   -9999.000000       0.046400       0.504000
54320     54320     neimenggu      119.3497       41.0600           76       197     2012      11        19        324              0.216083      -1.769226       0.000000       0.170029   -9999.000000   -9999.000000       0.038800   -9999.000000
54320     54320     neimenggu      119.3497       41.0600           76       197     2012      11        20        325              0.218375      -2.831299       0.000000       0.159554   -9999.000000       0.121500       0.041200       0.548000
54320     54320     neimenggu      119.3497       41.0600           76       197     2012      11        21        326              0.241083      -1.927551       0.000000       0.162908   -9999.000000   -9999.000000   -9999.000000       0.515000
54320     54320     neimenggu      119.3497       41.0600           76       197     2012      11        22        327              0.214458      -1.815033       0.000000       0.179228   -9999.000000       0.075700       0.026400       0.462000
54320     54320     neimenggu      119.3497       41.0600           76       197     2012      11        23        328              0.177583      -5.151642       0.000000       0.144294   -9999.000000   -9999.000000       0.033500       0.438000
54320     54320     neimenggu      119.3497       41.0600           76       197     2012      11        24        329              0.162875      -4.719086       0.000000       0.134428   -9999.000000   -9999.000000       0.032900   -9999.000000
54320     54320     neimenggu      119.3497       41.0600           76       197     2012      11        25        330              0.159125      -2.509003       0.000000       0.152942   -9999.000000   -9999.000000       0.033700       0.439000
54320     54320     neimenggu      119.3497       41.0600           76       197     2012      11        26        331              0.152083      -3.232513       0.000000       0.152600   -9999.000000       0.167400       0.031900       0.375000
54320     54320     neimenggu      119.3497       41.0600           76       197     2012      11        27        332              0.154292      -5.161163       0.000000       0.137280   -9999.000000   -9999.000000       0.033000       0.474000
54320     54320     neimenggu      119.3497       41.0600           76       197     2012      11        28        333              0.150083      -1.935150       0.000000       0.160236   -9999.000000   -9999.000000       0.033100       0.342000
54320     54320     neimenggu      119.3497       41.0600           76       197     2012      11        29        334              0.146042      -5.426971       0.000000       0.142970   -9999.000000       0.148100       0.032000       0.469000
54320     54320     neimenggu      119.3497       41.0600           76       197     2012      11        30        335              0.140583      -7.192963       0.000000       0.128867   -9999.000000       0.033400       0.020500       0.380000
54320     54320     neimenggu      119.3497       41.0600           76       197     2012      12        01        336              0.138958     -10.950226       0.000000       0.124593   -9999.000000   -9999.000000       0.034100       0.322000
54320     54320     neimenggu      119.3497       41.0600           76       197     2012      12        02        337              0.143133      -7.742798       0.000000       0.123437   -9999.000000   -9999.000000       0.033600       0.346000
54320     54320     neimenggu      119.3497       41.0600           76       197     2012      12        03        338              0.141458      -4.646545       0.000000       0.128066   -9999.000000   -9999.000000       0.030100       0.316000
54320     54320     neimenggu      119.3497       41.0600           76       197     2012      12        04        339              0.139542      -6.463776       0.000000       0.125427   -9999.000000       0.243100       0.034100       0.318000
54320     54320     neimenggu      119.3497       41.0600           76       197     2012      12        05        340              0.136417      -7.299225       0.000000       0.123880   -9999.000000   -9999.000000   -9999.000000       0.388000
54320     54320     neimenggu      119.3497       41.0600           76       197     2012      12        06        341              0.134250     -11.100830       0.000000       0.121893   -9999.000000   -9999.000000       0.033300       0.223000
54320     54320     neimenggu      119.3497       41.0600           76       197     2012      12        07        342              0.132792     -11.826233       0.000000       0.121449   -9999.000000   -9999.000000       0.031400       0.225000
54320     54320     neimenggu      119.3497       41.0600           76       197     2012      12        08        343              0.131083     -11.584869       0.000000       0.121612   -9999.000000   -9999.000000       0.036400       0.285000
54320     54320     neimenggu      119.3497       41.0600           76       197     2012      12        09        344              0.132125     -12.773773       0.000000       0.121395   -9999.000000   -9999.000000       0.030600       0.380000
54320     54320     neimenggu      119.3497       41.0600           76       197     2012      12        10        345              0.133167     -10.617859       0.000000       0.121952   -9999.000000   -9999.000000       0.029500       0.279000
54320     54320     neimenggu      119.3497       41.0600           76       197     2012      12        11        346              0.132500     -10.305298       0.000000       0.122521   -9999.000000   -9999.000000       0.025600       0.226000
54320     54320     neimenggu      119.3497       41.0600           76       197     2012      12        12        347              0.133292     -10.425903       0.000000       0.122219   -9999.000000   -9999.000000       0.030000       0.233000
54320     54320     neimenggu      119.3497       41.0600           76       197     2012      12        13        348              0.134292      -7.940796       0.000000       0.123527   -9999.000000   -9999.000000       0.028400   -9999.000000
54320     54320     neimenggu      119.3497       41.0600           76       197     2012      12        14        349              0.135625      -6.033875       0.000000       0.125604   -9999.000000   -9999.000000       0.027300       0.205000
54320     54320     neimenggu      119.3497       41.0600           76       197     2012      12        15        350              0.000000      -6.994141       0.000000       0.125332   -9999.000000   -9999.000000       0.032200       0.218000
54320     54320     neimenggu      119.3497       41.0600           76       197     2012      12        16        351              0.136458      -6.279480       0.000000       0.127272   -9999.000000   -9999.000000       0.027000       0.201000
54320     54320     neimenggu      119.3497       41.0600           76       197     2012      12        17        352              0.134458      -8.524933       0.000000       0.124646   -9999.000000       0.160400       0.021300       0.147000
54320     54320     neimenggu      119.3497       41.0600           76       197     2012      12        18        353              0.132792     -12.361084       0.000000       0.121634   -9999.000000       0.058900       0.022700   -9999.000000
54320     54320     neimenggu      119.3497       41.0600           76       197     2012      12        19        354              0.131958     -13.733002       0.000000       0.119898   -9999.000000   -9999.000000       0.023800       0.227000
54320     54320     neimenggu      119.3497       41.0600           76       197     2012      12        20        355              0.000000     -12.142761       0.000000       0.120167   -9999.000000   -9999.000000       0.025200       0.190000
54320     54320     neimenggu      119.3497       41.0600           76       197     2012      12        21        356              0.133917      -9.475128       0.000000       0.120825   -9999.000000   -9999.000000       0.020600       0.224000
54320     54320     neimenggu      119.3497       41.0600           76       197     2012      12        22        357              0.131833     -11.533691       0.000000       0.120795   -9999.000000       0.206500       0.017600       0.155000
54320     54320     neimenggu      119.3497       41.0600           76       197     2012      12        23        358              0.129792     -14.471222       0.000000       0.118822   -9999.000000       0.148600   -9999.000000   -9999.000000
54320     54320     neimenggu      119.3497       41.0600           76       197     2012      12        24        359              0.128650     -16.794983       0.000000       0.118009   -9999.000000   -9999.000000       0.022500       0.212000
54320     54320     neimenggu      119.3497       41.0600           76       197     2012      12        25        360              0.127917     -14.543732       0.000000       0.118095   -9999.000000   -9999.000000       0.021600       0.234000
54320     54320     neimenggu      119.3497       41.0600           76       197     2012      12        26        361              0.000000     -16.686005       0.000000       0.117480   -9999.000000   -9999.000000       0.022100       0.235000
54320     54320     neimenggu      119.3497       41.0600           76       197     2012      12        27        362              0.128600     -12.950287       0.000000       0.118010   -9999.000000   -9999.000000       0.025800       0.184000
54320     54320     neimenggu      119.3497       41.0600           76       197     2012      12        28        363              0.000000     -11.303772       2.624761       0.119125   -9999.000000   -9999.000000       0.024400       0.198000
54320     54320     neimenggu      119.3497       41.0600           76       197     2012      12        29        364              0.000000     -10.390259       0.000000       0.119465   -9999.000000   -9999.000000   -9999.000000       0.159000
54320     54320     neimenggu      119.3497       41.0600           76       197     2012      12        30        365              0.000000     -12.134491       0.000000       0.119393   -9999.000000   -9999.000000       0.019000       0.156000
54320     54320     neimenggu      119.3497       41.0600           76       197     2012      12        31        366              0.130000     -12.895599       0.000000       0.118573   -9999.000000   -9999.000000       0.017000       0.215000
