# Supplementary material for: Research on Fusing Multisatellite Soil Moisture Data Based on Bayesian Model Averaging
Source: Hindawi journal article supplement (doi:10.1155/2018/9310838), 2018-06-25
Supplement: f1 [file 9310838.f1.zip › 2012_sm00-10cm_daily_ZDB_ZHY_54405_366days_allin.txt]

54405     54405     hebei          115.5072       40.4175           78       182     2012      01        01        001              0.000000   -9999.000000       0.000000   -9999.000000   -9999.000000   -9999.000000       0.040400   -9999.000000
54405     54405     hebei          115.5072       40.4175           78       182     2012      01        02        002              0.828000      -8.600342       0.000000       0.102487   -9999.000000   -9999.000000       0.045500       0.062000
54405     54405     hebei          115.5072       40.4175           78       182     2012      01        03        003              0.000000      -9.843231       9.189513       0.102303   -9999.000000   -9999.000000       0.053000       0.169000
54405     54405     hebei          115.5072       40.4175           78       182     2012      01        04        004              0.000000     -11.122162       0.000000       0.101648   -9999.000000   -9999.000000       0.043700       0.065000
54405     54405     hebei          115.5072       40.4175           78       182     2012      01        05        005              0.000000     -10.290070       0.000000       0.101117   -9999.000000   -9999.000000       0.041100       0.102000
54405     54405     hebei          115.5072       40.4175           78       182     2012      01        06        006              0.000000      -8.739441       0.000000       0.101285   -9999.000000   -9999.000000       0.049500       0.023000
54405     54405     hebei          115.5072       40.4175           78       182     2012      01        07        007              0.000000      -8.708496       0.000000       0.101905   -9999.000000   -9999.000000       0.035200       0.119000
54405     54405     hebei          115.5072       40.4175           78       182     2012      01        08        008              0.000000      -9.137421       0.000000       0.101468   -9999.000000   -9999.000000       0.053600       0.271000
54405     54405     hebei          115.5072       40.4175           78       182     2012      01        09        009              0.000000      -7.866760       0.000000       0.102721   -9999.000000   -9999.000000       0.056800   -9999.000000
54405     54405     hebei          115.5072       40.4175           78       182     2012      01        10        010              0.000000      -7.310394       0.000000       0.104136   -9999.000000   -9999.000000       0.037700       0.146000
54405     54405     hebei          115.5072       40.4175           78       182     2012      01        11        011              0.000000      -8.759094       0.000000       0.101227   -9999.000000   -9999.000000       0.048200       0.086000
54405     54405     hebei          115.5072       40.4175           78       182     2012      01        12        012              0.000000      -8.892731       0.250807       0.100399   -9999.000000   -9999.000000       0.033000       0.105000
54405     54405     hebei          115.5072       40.4175           78       182     2012      01        13        013              0.000000      -6.948242       0.321793       0.104308   -9999.000000   -9999.000000       0.047700       0.215000
54405     54405     hebei          115.5072       40.4175           78       182     2012      01        14        014              0.000000      -6.579895       0.000000       0.107464   -9999.000000   -9999.000000       0.057000   -9999.000000
54405     54405     hebei          115.5072       40.4175           78       182     2012      01        15        015              0.000000      -6.614441       0.000000       0.107558   -9999.000000   -9999.000000       0.050000       0.071000
54405     54405     hebei          115.5072       40.4175           78       182     2012      01        16        016              0.000000      -6.879333       0.000000       0.107372   -9999.000000   -9999.000000       0.038800       0.142000
54405     54405     hebei          115.5072       40.4175           78       182     2012      01        17        017              0.000000      -6.736664       0.000000       0.108771   -9999.000000   -9999.000000       0.045300       0.102000
54405     54405     hebei          115.5072       40.4175           78       182     2012      01        18        018              0.000000      -6.873108       0.000000       0.108909   -9999.000000   -9999.000000       0.044800       0.173000
54405     54405     hebei          115.5072       40.4175           78       182     2012      01        19        019              0.000000      -6.015930       0.000000       0.113166   -9999.000000   -9999.000000       0.046600   -9999.000000
54405     54405     hebei          115.5072       40.4175           78       182     2012      01        20        020              0.000000      -5.787659       0.000000       0.114718   -9999.000000   -9999.000000       0.051700       0.078000
54405     54405     hebei          115.5072       40.4175           78       182     2012      01        21        021              0.000000     -10.957794       0.000000       0.104165   -9999.000000   -9999.000000       0.042500       0.121000
54405     54405     hebei          115.5072       40.4175           78       182     2012      01        22        022              0.000000     -12.504669       0.000000       0.101526   -9999.000000   -9999.000000       0.041600       0.026000
54405     54405     hebei          115.5072       40.4175           78       182     2012      01        23        023              0.000000     -11.988434       0.000000       0.101488   -9999.000000   -9999.000000       0.051700       0.179000
54405     54405     hebei          115.5072       40.4175           78       182     2012      01        24        024              0.000000     -10.281921       0.000000       0.101645   -9999.000000   -9999.000000   -9999.000000       0.054000
54405     54405     hebei          115.5072       40.4175           78       182     2012      01        25        025              0.000000     -10.903748       0.000000       0.101350   -9999.000000   -9999.000000       0.057600       0.089000
54405     54405     hebei          115.5072       40.4175           78       182     2012      01        26        026              0.000000      -8.975220       0.000000       0.101807   -9999.000000   -9999.000000       0.055600       0.119000
54405     54405     hebei          115.5072       40.4175           78       182     2012      01        27        027              0.000000      -7.442474       0.000000       0.108264   -9999.000000   -9999.000000       0.041400       0.232000
54405     54405     hebei          115.5072       40.4175           78       182     2012      01        28        028              0.000000      -7.479736       0.000000       0.108077   -9999.000000   -9999.000000       0.048200       0.086000
54405     54405     hebei          115.5072       40.4175           78       182     2012      01        29        029              0.000000      -8.397034       0.000000       0.107138   -9999.000000   -9999.000000       0.036700       0.057000
54405     54405     hebei          115.5072       40.4175           78       182     2012      01        30        030              0.000000      -9.144928       0.000000       0.102312   -9999.000000   -9999.000000       0.048700       0.057000
54405     54405     hebei          115.5072       40.4175           78       182     2012      01        31        031              0.000000      -7.876892       0.000000       0.105593   -9999.000000   -9999.000000       0.052800       0.058000
54405     54405     hebei          115.5072       40.4175           78       182     2012      02        01        032              0.000000     -10.546631       0.000000       0.101196   -9999.000000   -9999.000000       0.047200       0.174000
54405     54405     hebei          115.5072       40.4175           78       182     2012      02        02        033              0.000000     -11.958038       0.000000       0.100322   -9999.000000   -9999.000000       0.040500       0.103000
54405     54405     hebei          115.5072       40.4175           78       182     2012      02        03        034              0.000000     -10.710846       0.000000       0.100098   -9999.000000   -9999.000000       0.049900       0.085000
54405     54405     hebei          115.5072       40.4175           78       182     2012      02        04        035              0.000000      -8.599579       0.000000       0.102342   -9999.000000   -9999.000000       0.045900       0.032000
54405     54405     hebei          115.5072       40.4175           78       182     2012      02        05        036              0.000000      -7.501862       0.000000       0.105580   -9999.000000   -9999.000000       0.044300       0.110000
54405     54405     hebei          115.5072       40.4175           78       182     2012      02        06        037              0.000000      -5.526245       0.000000       0.118616   -9999.000000   -9999.000000       0.054800       0.262000
54405     54405     hebei          115.5072       40.4175           78       182     2012      02        07        038              0.000000     -11.972076       0.000000       0.104527   -9999.000000   -9999.000000       0.043500   -9999.000000
54405     54405     hebei          115.5072       40.4175           78       182     2012      02        08        039              0.000000     -11.161926       0.000000       0.102643   -9999.000000   -9999.000000       0.046600       0.118000
54405     54405     hebei          115.5072       40.4175           78       182     2012      02        09        040              0.000000      -8.869659       0.000000       0.103483   -9999.000000   -9999.000000       0.047700       0.047000
54405     54405     hebei          115.5072       40.4175           78       182     2012      02        10        041              0.000000      -7.325409       0.000000       0.108727   -9999.000000   -9999.000000       0.038700       0.152000
54405     54405     hebei          115.5072       40.4175           78       182     2012      02        11        042              0.000000      -6.901031       0.000000       0.112236   -9999.000000   -9999.000000       0.051200       0.211000
54405     54405     hebei          115.5072       40.4175           78       182     2012      02        12        043              0.000000      -5.484833       0.000000       0.121924   -9999.000000   -9999.000000       0.057400   -9999.000000
54405     54405     hebei          115.5072       40.4175           78       182     2012      02        13        044              0.000000      -5.500092       0.000000       0.121489       0.084000   -9999.000000   -9999.000000       0.170000
54405     54405     hebei          115.5072       40.4175           78       182     2012      02        14        045              0.000000      -2.222992       0.070070       0.147753   -9999.000000   -9999.000000       0.052200       0.062000
54405     54405     hebei          115.5072       40.4175           78       182     2012      02        15        046              0.000000      -5.920715       0.000000       0.127964   -9999.000000   -9999.000000       0.042100       0.100000
54405     54405     hebei          115.5072       40.4175           78       182     2012      02        16        047              0.000000      -5.397980       0.000000       0.129598   -9999.000000   -9999.000000       0.050800       0.241000
54405     54405     hebei          115.5072       40.4175           78       182     2012      02        17        048              0.000000      -7.892426       0.000000       0.113388   -9999.000000   -9999.000000       0.059600   -9999.000000
54405     54405     hebei          115.5072       40.4175           78       182     2012      02        18        049              0.000000      -8.732483       0.000000       0.108879   -9999.000000   -9999.000000       0.053300       0.076000
54405     54405     hebei          115.5072       40.4175           78       182     2012      02        19        050              0.000000      -6.121307       0.216901       0.119521   -9999.000000   -9999.000000       0.045100       0.146000
54405     54405     hebei          115.5072       40.4175           78       182     2012      02        20        051              0.000000      -4.973022       0.000000       0.133033       0.088000   -9999.000000       0.054900       0.104000
54405     54405     hebei          115.5072       40.4175           78       182     2012      02        21        052              0.000000      -1.936523       0.063782       0.152033       0.087000   -9999.000000   -9999.000000       0.253000
54405     54405     hebei          115.5072       40.4175           78       182     2012      02        22        053              0.000000      -0.950989       1.000155       0.158403   -9999.000000   -9999.000000       0.048400       0.059000
54405     54405     hebei          115.5072       40.4175           78       182     2012      02        23        054              0.828000      -2.447784       0.000000       0.152789       0.090000   -9999.000000       0.061400       0.105000
54405     54405     hebei          115.5072       40.4175           78       182     2012      02        24        055              0.828000      -1.242432       0.000000       0.154438       0.093000   -9999.000000       0.049700       0.073000
54405     54405     hebei          115.5072       40.4175           78       182     2012      02        25        056              0.828000      -2.606293       0.000000       0.152575       0.089000   -9999.000000       0.045700       0.176000
54405     54405     hebei          115.5072       40.4175           78       182     2012      02        26        057              0.828000      -3.888031       0.000000       0.135438       0.088000   -9999.000000       0.049600       0.157000
54405     54405     hebei          115.5072       40.4175           78       182     2012      02        27        058              0.828000      -2.126526       0.000000       0.151135   -9999.000000   -9999.000000   -9999.000000       0.055000
54405     54405     hebei          115.5072       40.4175           78       182     2012      02        28        059              0.828000      -0.686340       0.000000       0.159240   -9999.000000   -9999.000000       0.058700       0.095000
54405     54405     hebei          115.5072       40.4175           78       182     2012      02        29        060              0.000000   -9999.000000       0.000000   -9999.000000       0.089000   -9999.000000   -9999.000000   -9999.000000
54405     54405     hebei          115.5072       40.4175           78       182     2012      03        01        061              0.828000       0.293854       0.000000       0.165700   -9999.000000   -9999.000000       0.039200       0.276000
54405     54405     hebei          115.5072       40.4175           78       182     2012      03        02        062              0.828000       0.063538       0.335556       0.165276   -9999.000000   -9999.000000       0.049700       0.243000
54405     54405     hebei          115.5072       40.4175           78       182     2012      03        03        063              0.828000      -0.430511       0.000000       0.163192   -9999.000000   -9999.000000       0.046500       0.160000
54405     54405     hebei          115.5072       40.4175           78       182     2012      03        04        064              0.828000      -1.112732       0.157839       0.159373   -9999.000000   -9999.000000       0.052200       0.106000
54405     54405     hebei          115.5072       40.4175           78       182     2012      03        05        065              0.828000      -0.167877       0.224163       0.164878   -9999.000000   -9999.000000       0.058600       0.236000
54405     54405     hebei          115.5072       40.4175           78       182     2012      03        06        066              0.828000      -2.064056       6.663091       0.153171       0.097000   -9999.000000       0.047200       0.218000
54405     54405     hebei          115.5072       40.4175           78       182     2012      03        07        067              0.000000      -0.404785       0.000000       0.162089       0.094000   -9999.000000       0.038100   -9999.000000
54405     54405     hebei          115.5072       40.4175           78       182     2012      03        08        068              0.828000      -2.123444       0.000000       0.155581   -9999.000000   -9999.000000       0.047400       0.181000
54405     54405     hebei          115.5072       40.4175           78       182     2012      03        09        069              0.828000      -3.671967       0.050812       0.137586   -9999.000000   -9999.000000       0.041700       0.147000
54405     54405     hebei          115.5072       40.4175           78       182     2012      03        10        070              0.828000       0.173553       0.000000       0.164415   -9999.000000   -9999.000000       0.043700       0.138000
54405     54405     hebei          115.5072       40.4175           78       182     2012      03        11        071              0.828000      -4.849701       0.000000       0.134998       0.088000   -9999.000000       0.051600       0.193000
54405     54405     hebei          115.5072       40.4175           78       182     2012      03        12        072              0.828000      -3.237335       0.000000       0.140708       0.090000   -9999.000000       0.042200   -9999.000000
54405     54405     hebei          115.5072       40.4175           78       182     2012      03        13        073              0.828000       0.166595       0.111757       0.160931       0.080000   -9999.000000       0.048500       0.268000
54405     54405     hebei          115.5072       40.4175           78       182     2012      03        14        074              0.828000       2.241241       0.036502       0.173811   -9999.000000   -9999.000000       0.050800       0.223000
54405     54405     hebei          115.5072       40.4175           78       182     2012      03        15        075              0.828000       3.091309       1.737298       0.174800   -9999.000000   -9999.000000       0.043800       0.262000
54405     54405     hebei          115.5072       40.4175           78       182     2012      03        16        076              0.828000       3.730652       0.527054       0.185329       0.102000   -9999.000000       0.069000       0.418000
54405     54405     hebei          115.5072       40.4175           78       182     2012      03        17        077              0.828000       6.233795       0.165184       0.196034       0.096000   -9999.000000   -9999.000000   -9999.000000
54405     54405     hebei          115.5072       40.4175           78       182     2012      03        18        078              0.828000       4.876556       0.275401       0.188198       0.091000       0.026300       0.040600       0.335000
54405     54405     hebei          115.5072       40.4175           78       182     2012      03        19        079              0.828000       2.702026       1.077901       0.180173   -9999.000000   -9999.000000       0.052000       0.224000
54405     54405     hebei          115.5072       40.4175           78       182     2012      03        20        080              0.828000       3.405457       0.000000       0.180888   -9999.000000       0.029100       0.049600       0.295000
54405     54405     hebei          115.5072       40.4175           78       182     2012      03        21        081              0.828000       5.398102       0.000000       0.188523       0.082000   -9999.000000       0.058100       0.354000
54405     54405     hebei          115.5072       40.4175           78       182     2012      03        22        082              0.828000       5.878021       0.541358       0.194877       0.092000   -9999.000000       0.064000       0.283000
54405     54405     hebei          115.5072       40.4175           78       182     2012      03        23        083              0.828000       5.453735       0.867159       0.195275       0.091000   -9999.000000       0.052100       0.387000
54405     54405     hebei          115.5072       40.4175           78       182     2012      03        24        084              0.828000       2.636505       0.000000       0.194054   -9999.000000   -9999.000000   -9999.000000       0.259000
54405     54405     hebei          115.5072       40.4175           78       182     2012      03        25        085              0.000000       4.439392       0.641393       0.189795   -9999.000000   -9999.000000       0.055700       0.380000
54405     54405     hebei          115.5072       40.4175           78       182     2012      03        26        086              0.828000       6.271118       0.000000       0.191117       0.079000   -9999.000000       0.052700   -9999.000000
54405     54405     hebei          115.5072       40.4175           78       182     2012      03        27        087              0.828000       9.284363       1.518956       0.191108       0.088000   -9999.000000       0.065900       0.514000
54405     54405     hebei          115.5072       40.4175           78       182     2012      03        28        088              0.828000      10.639984       0.330078       0.188805       0.088000   -9999.000000       0.064400       0.419000
54405     54405     hebei          115.5072       40.4175           78       182     2012      03        29        089              0.828000      11.385376       0.000000       0.198521       0.073000   -9999.000000       0.043100       0.333000
54405     54405     hebei          115.5072       40.4175           78       182     2012      03        30        090              0.828000       8.803192       0.000000       0.186789   -9999.000000   -9999.000000       0.050900       0.440000
54405     54405     hebei          115.5072       40.4175           78       182     2012      03        31        091              0.828000       4.449554       1.532571       0.180434       0.080000   -9999.000000       0.057400       0.341000
54405     54405     hebei          115.5072       40.4175           78       182     2012      04        01        092              0.828000       7.018585       0.000000       0.179224       0.091000   -9999.000000       0.049100       0.395000
54405     54405     hebei          115.5072       40.4175           78       182     2012      04        02        093              0.828000       6.821808       0.290410       0.177076       0.089000   -9999.000000       0.067100       0.200000
54405     54405     hebei          115.5072       40.4175           78       182     2012      04        03        094              0.828000       5.531525       0.891722       0.171053       0.083000   -9999.000000   -9999.000000       0.406000
54405     54405     hebei          115.5072       40.4175           78       182     2012      04        04        095              0.828000       8.644684       0.000000       0.173964   -9999.000000   -9999.000000       0.042400       0.454000
54405     54405     hebei          115.5072       40.4175           78       182     2012      04        05        096              0.828000       8.442230       0.000000       0.168210   -9999.000000   -9999.000000       0.063100   -9999.000000
54405     54405     hebei          115.5072       40.4175           78       182     2012      04        06        097              0.828000       8.031860       0.000000       0.166586       0.093000   -9999.000000       0.054800       0.412000
54405     54405     hebei          115.5072       40.4175           78       182     2012      04        07        098              0.828000      11.246246       0.000000       0.163708       0.087000   -9999.000000       0.054200       0.352000
54405     54405     hebei          115.5072       40.4175           78       182     2012      04        08        099              0.828000      15.152557       0.000000       0.158080       0.070000   -9999.000000       0.065200       0.471000
54405     54405     hebei          115.5072       40.4175           78       182     2012      04        09        100              0.828000      13.268402       0.202488       0.153926       0.076000   -9999.000000       0.059100       0.571000
54405     54405     hebei          115.5072       40.4175           78       182     2012      04        10        101              0.828000      16.827057       1.556774       0.151938   -9999.000000   -9999.000000       0.052300   -9999.000000
54405     54405     hebei          115.5072       40.4175           78       182     2012      04        11        102              0.828000      13.241669       0.000000       0.170506       0.077000   -9999.000000       0.061300       0.475000
54405     54405     hebei          115.5072       40.4175           78       182     2012      04        12        103              0.828000      10.573029       0.000000       0.169428       0.086000       0.206500       0.055200       0.362000
54405     54405     hebei          115.5072       40.4175           78       182     2012      04        13        104              0.828000      13.813965       0.000000       0.161088       0.070000   -9999.000000       0.062500       0.469000
54405     54405     hebei          115.5072       40.4175           78       182     2012      04        14        105              0.828000      15.358276       0.000000       0.155468       0.074000   -9999.000000       0.069400       0.439000
54405     54405     hebei          115.5072       40.4175           78       182     2012      04        15        106              0.828000      17.554321       0.000000       0.150429   -9999.000000   -9999.000000       0.044600   -9999.000000
54405     54405     hebei          115.5072       40.4175           78       182     2012      04        16        107              0.828000      13.918274       0.000000       0.148395       0.070500   -9999.000000       0.066100       0.387000
54405     54405     hebei          115.5072       40.4175           78       182     2012      04        17        108              0.828000      14.587128       0.000000       0.147584       0.080500   -9999.000000   -9999.000000       0.433000
54405     54405     hebei          115.5072       40.4175           78       182     2012      04        18        109              0.828000      19.270782       0.661096       0.145709       0.088000   -9999.000000   -9999.000000       0.371000
54405     54405     hebei          115.5072       40.4175           78       182     2012      04        19        110              0.828000      17.150604       0.000000       0.153541       0.086500   -9999.000000       0.071900       0.411000
54405     54405     hebei          115.5072       40.4175           78       182     2012      04        20        111              0.828000      18.076324       0.000000       0.152219       0.087000   -9999.000000   -9999.000000       0.269000
54405     54405     hebei          115.5072       40.4175           78       182     2012      04        21        112              0.828000      17.550629       0.000000       0.149111       0.082000   -9999.000000       0.050200       0.375000
54405     54405     hebei          115.5072       40.4175           78       182     2012      04        22        113              0.828000      15.690399       0.000000       0.149063       0.086000   -9999.000000       0.070300       0.384000
54405     54405     hebei          115.5072       40.4175           78       182     2012      04        23        114              0.828000      20.898590      10.097559       0.145913       0.090000   -9999.000000       0.050500       0.441000
54405     54405     hebei          115.5072       40.4175           78       182     2012      04        24        115              0.828000      21.329132      31.009499       0.170445   -9999.000000       0.354300       0.101800       0.910000
54405     54405     hebei          115.5072       40.4175           78       182     2012      04        25        116              0.000000      10.618866       7.444010       0.322565   -9999.000000   -9999.000000       0.080100       0.627000
54405     54405     hebei          115.5072       40.4175           78       182     2012      04        26        117              0.828000      11.008545       0.320435       0.278112       0.099000   -9999.000000       0.060900       0.336000
54405     54405     hebei          115.5072       40.4175           78       182     2012      04        27        118              0.828000      15.221008       4.037109       0.262605       0.086000   -9999.000000   -9999.000000       0.240000
54405     54405     hebei          115.5072       40.4175           78       182     2012      04        28        119              0.828000      12.297394       2.036979       0.249851       0.082000   -9999.000000       0.060700       0.368000
54405     54405     hebei          115.5072       40.4175           78       182     2012      04        29        120              0.828000      14.554596       0.274219       0.238597       0.070000   -9999.000000       0.051000       0.406000
54405     54405     hebei          115.5072       40.4175           78       182     2012      04        30        121              0.828000      16.731140       0.000000       0.229426       0.085000       0.146500       0.067700       0.384000
54405     54405     hebei          115.5072       40.4175           78       182     2012      05        01        122              0.828000      17.108398       0.242227       0.224356       0.105000   -9999.000000       0.072200       0.533000
54405     54405     hebei          115.5072       40.4175           78       182     2012      05        02        123              0.797583      19.775574       3.490526       0.218424       0.082500   -9999.000000       0.049100       0.649000
54405     54405     hebei          115.5072       40.4175           78       182     2012      05        03        124              0.135458      20.713226       0.000000       0.205099       0.083000   -9999.000000       0.067100       0.654000
54405     54405     hebei          115.5072       40.4175           78       182     2012      05        04        125              0.103565      22.329651       0.000000       0.191075       0.087000   -9999.000000       0.049500   -9999.000000
54405     54405     hebei          115.5072       40.4175           78       182     2012      05        05        126              0.096250      23.686859       0.000000       0.178502       0.076500       0.137600       0.054600       0.454000
54405     54405     hebei          115.5072       40.4175           78       182     2012      05        06        127              0.091167      23.096588       0.000000       0.169335       0.082000   -9999.000000       0.067000       0.373000
54405     54405     hebei          115.5072       40.4175           78       182     2012      05        07        128              0.086458      25.157440       0.330565       0.163043   -9999.000000   -9999.000000       0.069300       0.480000
54405     54405     hebei          115.5072       40.4175           78       182     2012      05        08        129              0.083042      24.119934       0.000000       0.160351       0.082500       0.110200       0.054600       0.470000
54405     54405     hebei          115.5072       40.4175           78       182     2012      05        09        130              0.077000      25.311218       0.184861       0.156432       0.078000   -9999.000000       0.069000   -9999.000000
54405     54405     hebei          115.5072       40.4175           78       182     2012      05        10        131              0.077875      21.677490       2.328079       0.159259       0.080500   -9999.000000       0.062600       0.427000
54405     54405     hebei          115.5072       40.4175           78       182     2012      05        11        132              0.070625      25.850250       7.639585       0.169390       0.152000   -9999.000000       0.093500       0.668000
54405     54405     hebei          115.5072       40.4175           78       182     2012      05        12        133              0.073708      15.829620       0.000000       0.241533       0.110000   -9999.000000       0.085200       0.919000
54405     54405     hebei          115.5072       40.4175           78       182     2012      05        13        134              0.073417      16.939697       0.000000       0.229364       0.120000   -9999.000000       0.065300       0.419000
54405     54405     hebei          115.5072       40.4175           78       182     2012      05        14        135              0.069792      17.438690       0.000000       0.208085       0.111000   -9999.000000       0.078800   -9999.000000
54405     54405     hebei          115.5072       40.4175           78       182     2012      05        15        136              0.066542      16.456818       0.000000       0.192788       0.109000   -9999.000000       0.086900       0.391000
54405     54405     hebei          115.5072       40.4175           78       182     2012      05        16        137              0.064708      16.374023       0.000000       0.184571       0.097000   -9999.000000       0.075300       0.388000
54405     54405     hebei          115.5072       40.4175           78       182     2012      05        17        138              0.063625      17.956757       0.000000       0.176440       0.100000   -9999.000000       0.085700       0.337000
54405     54405     hebei          115.5072       40.4175           78       182     2012      05        18        139              0.061167      23.940155       0.289046       0.164048       0.102500   -9999.000000       0.084300       0.578000
54405     54405     hebei          115.5072       40.4175           78       182     2012      05        19        140              0.090625      24.871857       8.425603       0.158982       0.106000   -9999.000000       0.088500       0.349000
54405     54405     hebei          115.5072       40.4175           78       182     2012      05        20        141              0.130917      23.760651       0.177772       0.211740       0.103000   -9999.000000       0.098900       0.651000
54405     54405     hebei          115.5072       40.4175           78       182     2012      05        21        142              0.116292      22.287506       2.015499       0.221149       0.134000   -9999.000000       0.095300       0.349000
54405     54405     hebei          115.5072       40.4175           78       182     2012      05        22        143              0.111083      21.004486       0.000000       0.214177       0.119000   -9999.000000       0.098600       0.329000
54405     54405     hebei          115.5072       40.4175           78       182     2012      05        23        144              0.103708      19.870483       0.000000       0.206025   -9999.000000   -9999.000000       0.104200       0.368000
54405     54405     hebei          115.5072       40.4175           78       182     2012      05        24        145              0.096458      19.459839       0.000000       0.185972       0.126000   -9999.000000       0.102700       0.282000
54405     54405     hebei          115.5072       40.4175           78       182     2012      05        25        146              0.000000      21.131989       0.000000       0.171831       0.115000   -9999.000000       0.085300       0.249000
54405     54405     hebei          115.5072       40.4175           78       182     2012      05        26        147              0.084375      19.515137       0.000000       0.165478       0.104000   -9999.000000       0.100100       0.385000
54405     54405     hebei          115.5072       40.4175           78       182     2012      05        27        148              0.078875      24.211212       0.000000       0.156212       0.107000   -9999.000000       0.090200       0.506000
54405     54405     hebei          115.5072       40.4175           78       182     2012      05        28        149              0.073042      26.417175       0.000000       0.149551       0.106500   -9999.000000       0.086400       0.365000
54405     54405     hebei          115.5072       40.4175           78       182     2012      05        29        150              0.067000      28.114136       8.301715       0.145380       0.185000   -9999.000000       0.150500       0.755000
54405     54405     hebei          115.5072       40.4175           78       182     2012      05        30        151              0.072625      16.644409       0.000000       0.235239       0.135000   -9999.000000       0.091900   -9999.000000
54405     54405     hebei          115.5072       40.4175           78       182     2012      05        31        152              0.069208      19.705963       2.748712       0.206161       0.139000       0.151400   -9999.000000   -9999.000000
54405     54405     hebei          115.5072       40.4175           78       182     2012      06        01        153              0.070875      18.284943       0.776070       0.210157       0.168000   -9999.000000       0.111300       0.493000
54405     54405     hebei          115.5072       40.4175           78       182     2012      06        02        154              0.074333      19.817108       5.621311       0.213012   -9999.000000   -9999.000000       0.089700   -9999.000000
54405     54405     hebei          115.5072       40.4175           78       182     2012      06        03        155              0.088583      22.978699       2.553962       0.204159       0.208500       0.187300       0.139300       0.825000
54405     54405     hebei          115.5072       40.4175           78       182     2012      06        04        156              0.100042      19.105957       0.151266       0.251495       0.153000       0.368400   -9999.000000       0.359000
54405     54405     hebei          115.5072       40.4175           78       182     2012      06        05        157              0.098750      23.420197       0.000000       0.216081       0.127000       0.110000       0.152400       0.424000
54405     54405     hebei          115.5072       40.4175           78       182     2012      06        06        158              0.131417      26.038910       7.223416       0.191851       0.191000   -9999.000000       0.244800       0.929000
54405     54405     hebei          115.5072       40.4175           78       182     2012      06        07        159              0.143875      22.096680       0.081740       0.239767       0.159000   -9999.000000       0.187100   -9999.000000
54405     54405     hebei          115.5072       40.4175           78       182     2012      06        08        160              0.130167      24.636871       0.275640       0.218776       0.138000   -9999.000000       0.173600       0.439000
54405     54405     hebei          115.5072       40.4175           78       182     2012      06        09        161              0.117250      25.282440       2.507610       0.195288       0.164000   -9999.000000       0.222200       0.568000
54405     54405     hebei          115.5072       40.4175           78       182     2012      06        10        162              0.108739      22.766754       0.000000       0.204968       0.131000       0.222500       0.188400       0.444000
54405     54405     hebei          115.5072       40.4175           78       182     2012      06        11        163              0.000000      20.755524       0.000000       0.187054       0.187500   -9999.000000       0.132300       0.414000
54405     54405     hebei          115.5072       40.4175           78       182     2012      06        12        164              0.094875      22.520477       0.966646       0.169451       0.153000   -9999.000000       0.154400   -9999.000000
54405     54405     hebei          115.5072       40.4175           78       182     2012      06        13        165              0.085417      22.283569       0.945619       0.160375       0.167500   -9999.000000       0.152200       0.370000
54405     54405     hebei          115.5072       40.4175           78       182     2012      06        14        166              0.081429      19.722748       0.933996       0.167578       0.171500   -9999.000000       0.172100       0.597000
54405     54405     hebei          115.5072       40.4175           78       182     2012      06        15        167              0.076667      18.547546       4.229749       0.176689       0.179000   -9999.000000       0.176800       0.562000
54405     54405     hebei          115.5072       40.4175           78       182     2012      06        16        168              0.077542      19.300781       1.518641       0.210094       0.140500   -9999.000000       0.135600       0.469000
54405     54405     hebei          115.5072       40.4175           78       182     2012      06        17        169              0.072542      23.871490      14.340871       0.194646       0.147000   -9999.000000       0.143700       0.356000
54405     54405     hebei          115.5072       40.4175           78       182     2012      06        18        170              0.069000      27.130493       4.319207       0.169988       0.161500   -9999.000000       0.197800       0.499000
54405     54405     hebei          115.5072       40.4175           78       182     2012      06        19        171              0.107957      26.479156      17.985996       0.197782       0.173500   -9999.000000       0.067100       0.572000
54405     54405     hebei          115.5072       40.4175           78       182     2012      06        20        172              0.146958      25.330933       0.000000       0.279543       0.180000   -9999.000000       0.205600       0.645000
54405     54405     hebei          115.5072       40.4175           78       182     2012      06        21        173              0.130958      24.079865       1.367434       0.257255       0.165500   -9999.000000   -9999.000000       0.546000
54405     54405     hebei          115.5072       40.4175           78       182     2012      06        22        174              0.120750      24.545044       3.560255       0.232754       0.168000       0.464500       0.149100       0.667000
54405     54405     hebei          115.5072       40.4175           78       182     2012      06        23        175              0.112625      25.400482       0.485241       0.235091       0.173000       0.022200       0.195600       0.531000
54405     54405     hebei          115.5072       40.4175           78       182     2012      06        24        176              0.100833      26.381805       2.250099       0.222596       0.257000   -9999.000000       0.200800       0.646000
54405     54405     hebei          115.5072       40.4175           78       182     2012      06        25        177              0.100875      22.720551       0.616838       0.234115       0.214000   -9999.000000       0.171200       0.536000
54405     54405     hebei          115.5072       40.4175           78       182     2012      06        26        178              0.092250      24.306580       0.340864       0.215511       0.167000       0.115700       0.176200       0.560000
54405     54405     hebei          115.5072       40.4175           78       182     2012      06        27        179              0.088583      23.842041       0.826713       0.202122   -9999.000000   -9999.000000       0.196800       0.529000
54405     54405     hebei          115.5072       40.4175           78       182     2012      06        28        180              0.083167      23.650238       2.596727       0.190002       0.233000       0.091800       0.179300       0.997000
54405     54405     hebei          115.5072       40.4175           78       182     2012      06        29        181              0.088292      19.898560       3.826166       0.217646       0.183500   -9999.000000       0.190400       0.765000
54405     54405     hebei          115.5072       40.4175           78       182     2012      06        30        182              0.091208      23.851532       0.000000       0.206423       0.160000   -9999.000000       0.145900   -9999.000000
54405     54405     hebei          115.5072       40.4175           78       182     2012      07        01        183              0.084917      27.222504       0.000000       0.180679       0.167000       0.107900       0.160000   -9999.000000
54405     54405     hebei          115.5072       40.4175           78       182     2012      07        02        184              0.076227      28.085052       0.000000       0.161011       0.158500   -9999.000000       0.149000       0.511000
54405     54405     hebei          115.5072       40.4175           78       182     2012      07        03        185              0.071083      28.650848       0.000000       0.150019       0.179000   -9999.000000       0.125200       0.475000
54405     54405     hebei          115.5072       40.4175           78       182     2012      07        04        186              0.063792      30.175598       0.085613       0.144844       0.197000       0.123900       0.150700       0.544000
54405     54405     hebei          115.5072       40.4175           78       182     2012      07        05        187              0.091261      29.040527      16.315449       0.142930       0.198000   -9999.000000       0.203600       1.000000
54405     54405     hebei          115.5072       40.4175           78       182     2012      07        06        188              0.133708      25.518890       0.846070       0.262452   -9999.000000       0.206100       0.179300   -9999.000000
54405     54405     hebei          115.5072       40.4175           78       182     2012      07        07        189              0.122958      24.778473       0.253263       0.252716   -9999.000000   -9999.000000       0.163100       0.696000
54405     54405     hebei          115.5072       40.4175           78       182     2012      07        08        190              0.113458      25.893372       0.268896       0.224845       0.213000   -9999.000000   -9999.000000       0.591000
54405     54405     hebei          115.5072       40.4175           78       182     2012      07        09        191              0.107625      26.256714       1.500103       0.207512       0.198000       0.103000       0.185300       0.555000
54405     54405     hebei          115.5072       40.4175           78       182     2012      07        10        192              0.099043      26.641022       6.926007       0.206132       0.162000   -9999.000000       0.221100       0.613000
54405     54405     hebei          115.5072       40.4175           78       182     2012      07        11        193              0.089583      26.160980       0.182913       0.244457   -9999.000000       0.084200       0.185100   -9999.000000
54405     54405     hebei          115.5072       40.4175           78       182     2012      07        12        194              0.081217      26.194458       0.105622       0.211755   -9999.000000   -9999.000000       0.189700       0.541000
54405     54405     hebei          115.5072       40.4175           78       182     2012      07        13        195              0.075167      25.365784       0.000000       0.193434       0.221000   -9999.000000       0.205000       0.473000
54405     54405     hebei          115.5072       40.4175           78       182     2012      07        14        196              0.071250      25.348389       0.000000       0.179553       0.242000   -9999.000000       0.182600       0.501000
54405     54405     hebei          115.5072       40.4175           78       182     2012      07        15        197              0.067875      25.547394       0.000000       0.164998       0.184000   -9999.000000       0.176800       0.488000
54405     54405     hebei          115.5072       40.4175           78       182     2012      07        16        198              0.063708      28.097046       0.233969       0.151681       0.203000   -9999.000000       0.222900       0.416000
54405     54405     hebei          115.5072       40.4175           78       182     2012      07        17        199              0.059542      29.575592       0.000000       0.143606       0.221000   -9999.000000       0.206700       0.585000
54405     54405     hebei          115.5072       40.4175           78       182     2012      07        18        200              0.056083      29.810669       0.000000       0.139679       0.186000   -9999.000000       0.227600       0.418000
54405     54405     hebei          115.5072       40.4175           78       182     2012      07        19        201              0.053833      30.266266       0.487825       0.137430       0.193000       0.039800       0.233000       0.486000
54405     54405     hebei          115.5072       40.4175           78       182     2012      07        20        202              0.052522      31.001923       0.803070       0.138722       0.204000       0.840000       0.182300       0.454000
54405     54405     hebei          115.5072       40.4175           78       182     2012      07        21        203              0.151500      30.305939      39.688183       0.137191       0.412000   -9999.000000       0.338200       0.505000
54405     54405     hebei          115.5072       40.4175           78       182     2012      07        22        204              0.166667      23.010406       0.108601       0.298925       0.419000   -9999.000000       0.257900       0.938000
54405     54405     hebei          115.5072       40.4175           78       182     2012      07        23        205              0.148833      24.170319       0.000000       0.274089       0.322000   -9999.000000       0.251100       0.574000
54405     54405     hebei          115.5072       40.4175           78       182     2012      07        24        206              0.138583      25.332855       0.210430       0.251219       0.283000       0.147700       0.237800       0.585000
54405     54405     hebei          115.5072       40.4175           78       182     2012      07        25        207              0.125708      27.462006       1.515325       0.233753       0.315000   -9999.000000       0.262200   -9999.000000
54405     54405     hebei          115.5072       40.4175           78       182     2012      07        26        208              0.123042      24.161133       0.000000       0.239383       0.286500   -9999.000000       0.214500       0.776000
54405     54405     hebei          115.5072       40.4175           78       182     2012      07        27        209              0.117792      27.725433       0.327375       0.223127       0.280000       0.115400       0.240400       0.597000
54405     54405     hebei          115.5072       40.4175           78       182     2012      07        28        210              0.116250      27.131104       4.481554       0.209785       0.275000   -9999.000000       0.217900       0.825000
54405     54405     hebei          115.5072       40.4175           78       182     2012      07        29        211              0.112542      26.414032       0.000000       0.230787       0.266500       0.045700       0.220300       0.528000
54405     54405     hebei          115.5072       40.4175           78       182     2012      07        30        212              0.137542      25.728790      27.464697       0.216000   -9999.000000   -9999.000000       0.281700   -9999.000000
54405     54405     hebei          115.5072       40.4175           78       182     2012      07        31        213              0.212667      23.186005       5.668407       0.268737       0.371500   -9999.000000       0.298100       1.000000
54405     54405     hebei          115.5072       40.4175           78       182     2012      08        01        214              0.182250      20.377106       0.587411       0.307864       0.430500   -9999.000000       0.264300       0.893000
54405     54405     hebei          115.5072       40.4175           78       182     2012      08        02        215              0.168583      20.598755       0.000000       0.283820       0.419000   -9999.000000       0.263700       1.000000
54405     54405     hebei          115.5072       40.4175           78       182     2012      08        03        216              0.151500      25.016174       0.421085       0.265555       0.333500       0.160700       0.232700       0.655000
54405     54405     hebei          115.5072       40.4175           78       182     2012      08        04        217              0.139625      26.071167       0.321111       0.250657       0.312000   -9999.000000       0.241400   -9999.000000
54405     54405     hebei          115.5072       40.4175           78       182     2012      08        05        218              0.127667      27.066101       0.000000       0.239390       0.313000   -9999.000000       0.223700       0.656000
54405     54405     hebei          115.5072       40.4175           78       182     2012      08        06        219              0.115739      26.608276       0.000000       0.225691       0.321500   -9999.000000       0.104800       0.572000
54405     54405     hebei          115.5072       40.4175           78       182     2012      08        07        220              0.129250      27.254730      10.915306       0.213246       0.292000   -9999.000000   -9999.000000       0.523000
54405     54405     hebei          115.5072       40.4175           78       182     2012      08        08        221              0.157667      28.299866       0.869916       0.260132       0.324000   -9999.000000       0.128800       0.796000
54405     54405     hebei          115.5072       40.4175           78       182     2012      08        09        222              0.139833      24.508240       0.000000       0.257517       0.305000   -9999.000000       0.112100   -9999.000000
54405     54405     hebei          115.5072       40.4175           78       182     2012      08        10        223              0.123667      26.099518       0.000000       0.233056       0.333000   -9999.000000       0.136600       0.631000
54405     54405     hebei          115.5072       40.4175           78       182     2012      08        11        224              0.138125      26.301483       4.993578       0.217992       0.369000       0.262000       0.146400       0.954000
54405     54405     hebei          115.5072       40.4175           78       182     2012      08        12        225              0.154250      21.721130       0.000000       0.243916       0.334000   -9999.000000       0.114800       0.843000
54405     54405     hebei          115.5072       40.4175           78       182     2012      08        13        226              0.133667      24.124634       0.000000       0.232484       0.357000   -9999.000000       0.185700       0.554000
54405     54405     hebei          115.5072       40.4175           78       182     2012      08        14        227              0.119250      23.969635       5.546204       0.214099       0.363500   -9999.000000       0.184100       0.457000
54405     54405     hebei          115.5072       40.4175           78       182     2012      08        15        228              0.111500      21.480713       1.097688       0.243913       0.342000   -9999.000000       0.184500       0.742000
54405     54405     hebei          115.5072       40.4175           78       182     2012      08        16        229              0.100917      22.200256       0.000000       0.235042       0.303000       0.028200       0.190700       0.509000
54405     54405     hebei          115.5072       40.4175           78       182     2012      08        17        230              0.090917      24.402252       0.000000       0.217003       0.324500   -9999.000000       0.166200       0.559000
54405     54405     hebei          115.5072       40.4175           78       182     2012      08        18        231              0.083208      25.071198       0.235382       0.204624       0.338000   -9999.000000       0.175500       0.452000
54405     54405     hebei          115.5072       40.4175           78       182     2012      08        19        232              0.076333      23.046509       0.000000       0.195070       0.356000       0.191900       0.187700       0.426000
54405     54405     hebei          115.5072       40.4175           78       182     2012      08        20        233              0.069000      25.872681       0.092243       0.180788       0.339000       0.197700       0.164900       0.388000
54405     54405     hebei          115.5072       40.4175           78       182     2012      08        21        234              0.063125      22.736298       0.816472       0.170882       0.318000   -9999.000000       0.196500       0.416000
54405     54405     hebei          115.5072       40.4175           78       182     2012      08        22        235              0.058875      21.331848       0.000000       0.163197       0.298500   -9999.000000   -9999.000000   -9999.000000
54405     54405     hebei          115.5072       40.4175           78       182     2012      08        23        236              0.055292      21.869110       0.000000       0.160854       0.331000   -9999.000000       0.154600       0.413000
54405     54405     hebei          115.5072       40.4175           78       182     2012      08        24        237              0.052667      24.269348       0.000000       0.153879       0.289000       0.351400       0.196700       0.498000
54405     54405     hebei          115.5072       40.4175           78       182     2012      08        25        238              0.000000      24.611969       0.000000       0.148827       0.295000   -9999.000000       0.178600       0.395000
54405     54405     hebei          115.5072       40.4175           78       182     2012      08        26        239              0.048292      25.851685       5.983987       0.145579       0.296000   -9999.000000       0.177200       0.578000
54405     54405     hebei          115.5072       40.4175           78       182     2012      08        27        240              0.046333      26.242798       1.117363       0.143401       0.306000   -9999.000000       0.172000       0.744000
54405     54405     hebei          115.5072       40.4175           78       182     2012      08        28        241              0.045087      25.578613       0.635400       0.150970       0.326000   -9999.000000       0.176800   -9999.000000
54405     54405     hebei          115.5072       40.4175           78       182     2012      08        29        242              0.043375      25.103851       0.000000       0.154853       0.317000       0.347200       0.153400       0.495000
54405     54405     hebei          115.5072       40.4175           78       182     2012      08        30        243              0.041375      26.588074       0.078662       0.145113       0.299000   -9999.000000       0.178500       0.447000
54405     54405     hebei          115.5072       40.4175           78       182     2012      08        31        244              0.039375      28.250000       0.683584       0.139495       0.308000   -9999.000000       0.159500       0.545000
54405     54405     hebei          115.5072       40.4175           78       182     2012      09        01        245              0.072583      26.430267      37.919010       0.144046   -9999.000000       0.179600       0.212900       1.000000
54405     54405     hebei          115.5072       40.4175           78       182     2012      09        02        246              0.141167      22.055695       8.434835       0.261516       0.328000   -9999.000000       0.232900   -9999.000000
54405     54405     hebei          115.5072       40.4175           78       182     2012      09        03        247              0.119826      17.514526       1.648287       0.289594       0.326000   -9999.000000       0.147600       0.802000
54405     54405     hebei          115.5072       40.4175           78       182     2012      09        04        248              0.108000      16.346954       0.613086       0.264901       0.217000   -9999.000000       0.169100       0.521000
54405     54405     hebei          115.5072       40.4175           78       182     2012      09        05        249              0.100125      17.524414       0.000000       0.250980       0.235000   -9999.000000       0.163900       0.763000
54405     54405     hebei          115.5072       40.4175           78       182     2012      09        06        250              0.091208      19.660919       0.000000       0.239576       0.262000   -9999.000000       0.149500       0.565000
54405     54405     hebei          115.5072       40.4175           78       182     2012      09        07        251              0.085458      20.109039       0.000000       0.231253       0.222000   -9999.000000       0.168000   -9999.000000
54405     54405     hebei          115.5072       40.4175           78       182     2012      09        08        252              0.079000      20.751984       0.000000       0.223586       0.229500       0.049600   -9999.000000       0.576000
54405     54405     hebei          115.5072       40.4175           78       182     2012      09        09        253              0.073417      21.808258       0.000000       0.214639       0.229000   -9999.000000       0.131700       0.550000
54405     54405     hebei          115.5072       40.4175           78       182     2012      09        10        254              0.067458      22.989380       0.154348       0.203930       0.216000   -9999.000000       0.101700       0.510000
54405     54405     hebei          115.5072       40.4175           78       182     2012      09        11        255              0.063708      21.932556       4.008028       0.196123       0.215000   -9999.000000       0.102300       0.639000
54405     54405     hebei          115.5072       40.4175           78       182     2012      09        12        256              0.059708      19.385559       0.000000       0.224882       0.216500       0.480700       0.091900       0.649000
54405     54405     hebei          115.5072       40.4175           78       182     2012      09        13        257              0.056208      16.386169       0.211269       0.216825       0.225000       0.097200       0.112500       0.471000
54405     54405     hebei          115.5072       40.4175           78       182     2012      09        14        258              0.054583      15.069733       0.000000       0.208776       0.210000   -9999.000000       0.093800       0.432000
54405     54405     hebei          115.5072       40.4175           78       182     2012      09        15        259              0.052417      16.052124       0.000000       0.201233   -9999.000000       0.128300       0.085600       0.499000
54405     54405     hebei          115.5072       40.4175           78       182     2012      09        16        260              0.049625      17.401978       0.000000       0.193471       0.203000       0.131000       0.104600       0.370000
54405     54405     hebei          115.5072       40.4175           78       182     2012      09        17        261              0.047125      18.070099       0.000000       0.185645       0.211000   -9999.000000       0.092200       0.370000
54405     54405     hebei          115.5072       40.4175           78       182     2012      09        18        262              0.044917      18.517792       0.000000       0.178051       0.194000   -9999.000000       0.104400       0.295000
54405     54405     hebei          115.5072       40.4175           78       182     2012      09        19        263              0.043500      18.829407       0.000000       0.171198       0.220000   -9999.000000       0.102200       0.476000
54405     54405     hebei          115.5072       40.4175           78       182     2012      09        20        264              0.041583      19.152924       1.410885       0.165892       0.191000       0.223600       0.083700       0.586000
54405     54405     hebei          115.5072       40.4175           78       182     2012      09        21        265              0.040500      20.401398       0.445880       0.163174   -9999.000000   -9999.000000       0.109800       0.502000
54405     54405     hebei          115.5072       40.4175           78       182     2012      09        22        266              0.040417      19.041840       0.981703       0.171031       0.168000   -9999.000000       0.089200       0.604000
54405     54405     hebei          115.5072       40.4175           78       182     2012      09        23        267              0.040625      18.709351       0.581829       0.180036       0.167500   -9999.000000       0.098900       0.538000
54405     54405     hebei          115.5072       40.4175           78       182     2012      09        24        268              0.038875      19.813812       1.461658       0.181063       0.186000   -9999.000000       0.131400       0.640000
54405     54405     hebei          115.5072       40.4175           78       182     2012      09        25        269              0.094250      18.849243      22.282770       0.180339   -9999.000000   -9999.000000       0.143800       1.000000
54405     54405     hebei          115.5072       40.4175           78       182     2012      09        26        270              0.112000      14.445160       0.975134       0.300007       0.200500       0.317100       0.119200   -9999.000000
54405     54405     hebei          115.5072       40.4175           78       182     2012      09        27        271              0.113929      16.616058       4.314028       0.268711   -9999.000000   -9999.000000       0.158300       0.901000
54405     54405     hebei          115.5072       40.4175           78       182     2012      09        28        272              0.101000      12.093811       0.000000       0.279103   -9999.000000   -9999.000000       0.133900       0.663000
54405     54405     hebei          115.5072       40.4175           78       182     2012      09        29        273              0.095458      11.891296       0.000000       0.257530       0.200000   -9999.000000       0.127000       0.757000
54405     54405     hebei          115.5072       40.4175           78       182     2012      09        30        274              0.088958      12.684082       0.000000       0.247315       0.187000   -9999.000000       0.136800       0.610000
54405     54405     hebei          115.5072       40.4175           78       182     2012      10        01        275              0.083208      13.804382       0.000000       0.240418       0.111000   -9999.000000       0.083300   -9999.000000
54405     54405     hebei          115.5072       40.4175           78       182     2012      10        02        276              0.078083      15.193512       0.347021       0.233586       0.128000   -9999.000000       0.083700       0.603000
54405     54405     hebei          115.5072       40.4175           78       182     2012      10        03        277              0.071375      16.346375       0.000000       0.227960       0.146000   -9999.000000       0.103800       0.553000
54405     54405     hebei          115.5072       40.4175           78       182     2012      10        04        278              0.067292      14.253998       0.000000       0.221273       0.128500       0.029800       0.084900       0.524000
54405     54405     hebei          115.5072       40.4175           78       182     2012      10        05        279              0.065000      12.837952       0.000000       0.219449       0.137500       0.030900       0.086400       0.524000
54405     54405     hebei          115.5072       40.4175           78       182     2012      10        06        280              0.062500      13.744232       0.000000       0.216218       0.145000   -9999.000000       0.098700   -9999.000000
54405     54405     hebei          115.5072       40.4175           78       182     2012      10        07        281              0.059333      14.382690       0.000000       0.211589       0.137000       0.165500       0.071900       0.497000
54405     54405     hebei          115.5072       40.4175           78       182     2012      10        08        282              0.060708      14.892670       8.033927       0.208381       0.151000   -9999.000000       0.088500       0.498000
54405     54405     hebei          115.5072       40.4175           78       182     2012      10        09        283              0.067542      16.088196       0.059699       0.234035       0.159000   -9999.000000       0.079000       0.862000
54405     54405     hebei          115.5072       40.4175           78       182     2012      10        10        284              0.067375      10.197998       0.000000       0.254177       0.159000   -9999.000000       0.078800       0.568000
54405     54405     hebei          115.5072       40.4175           78       182     2012      10        11        285              0.066917      10.769379       0.000000       0.240615       0.128000   -9999.000000       0.090200       0.501000
54405     54405     hebei          115.5072       40.4175           78       182     2012      10        12        286              0.064792      12.716980       0.000000       0.233274       0.110000   -9999.000000       0.081700       0.620000
54405     54405     hebei          115.5072       40.4175           78       182     2012      10        13        287              0.059792      12.972076       0.000000       0.226535   -9999.000000       0.211400       0.065900       0.391000
54405     54405     hebei          115.5072       40.4175           78       182     2012      10        14        288              0.058875       9.064606       0.000000       0.219277       0.118000       0.045700       0.087500       0.534000
54405     54405     hebei          115.5072       40.4175           78       182     2012      10        15        289              0.060417      10.402771      13.484650       0.216370       0.124500   -9999.000000       0.075000       0.728000
54405     54405     hebei          115.5072       40.4175           78       182     2012      10        16        290              0.085875      10.195770       1.805213       0.246830       0.184000   -9999.000000       0.096400       0.890000
54405     54405     hebei          115.5072       40.4175           78       182     2012      10        17        291              0.082500       6.172821       0.628298       0.282271       0.153000   -9999.000000       0.099600       0.635000
54405     54405     hebei          115.5072       40.4175           78       182     2012      10        18        292              0.079083       7.247467       0.327976       0.262258       0.117000   -9999.000000       0.070300       0.521000
54405     54405     hebei          115.5072       40.4175           78       182     2012      10        19        293              0.076417       8.088593       0.000000       0.253765       0.121000       0.118200       0.073100       0.543000
54405     54405     hebei          115.5072       40.4175           78       182     2012      10        20        294              0.074375       9.478424       0.000000       0.248218       0.115500   -9999.000000       0.084000       0.510000
54405     54405     hebei          115.5072       40.4175           78       182     2012      10        21        295              0.094217      11.034760      13.376193       0.243866       0.160000   -9999.000000       0.083800       0.527000
54405     54405     hebei          115.5072       40.4175           78       182     2012      10        22        296              0.103250       7.072968       0.248535       0.294684   -9999.000000       0.413300       0.098400       0.830000
54405     54405     hebei          115.5072       40.4175           78       182     2012      10        23        297              0.097042       6.423004       0.171512       0.276884   -9999.000000   -9999.000000   -9999.000000       0.885000
54405     54405     hebei          115.5072       40.4175           78       182     2012      10        24        298              0.091458       8.693909       0.000000       0.267101   -9999.000000   -9999.000000       0.063900       0.671000
54405     54405     hebei          115.5072       40.4175           78       182     2012      10        25        299              0.000000       9.714813       0.000000       0.260416       0.111000   -9999.000000       0.078800   -9999.000000
54405     54405     hebei          115.5072       40.4175           78       182     2012      10        26        300              0.084208      10.472504       0.221485       0.255860       0.114000   -9999.000000       0.072400       0.659000
54405     54405     hebei          115.5072       40.4175           78       182     2012      10        27        301              0.080375      10.283997       0.000000       0.254427       0.124000       0.324000       0.071200       0.558000
54405     54405     hebei          115.5072       40.4175           78       182     2012      10        28        302              0.000000       8.304779       2.007901       0.249203       0.102000   -9999.000000       0.089400       0.553000
54405     54405     hebei          115.5072       40.4175           78       182     2012      10        29        303              0.073833       7.660492       0.194745       0.258351   -9999.000000   -9999.000000       0.065200       0.444000
54405     54405     hebei          115.5072       40.4175           78       182     2012      10        30        304              0.071792       5.108978       0.000000       0.241006   -9999.000000       0.158100       0.050900   -9999.000000
54405     54405     hebei          115.5072       40.4175           78       182     2012      10        31        305              0.069500       4.396179       1.005711       0.236076       0.100000   -9999.000000       0.065100       0.416000
54405     54405     hebei          115.5072       40.4175           78       182     2012      11        01        306              0.068292       4.098083       0.000000       0.236719       0.102000   -9999.000000       0.060600       0.365000
54405     54405     hebei          115.5072       40.4175           78       182     2012      11        02        307              0.066625       5.444305       0.000000       0.241676       0.106000   -9999.000000       0.076700       0.428000
54405     54405     hebei          115.5072       40.4175           78       182     2012      11        03        308              0.110875       7.697235      13.192525       0.241901   -9999.000000   -9999.000000       0.074700       0.781000
54405     54405     hebei          115.5072       40.4175           78       182     2012      11        04        309              0.146208       3.944397       0.177021       0.274126   -9999.000000   -9999.000000       0.052300   -9999.000000
54405     54405     hebei          115.5072       40.4175           78       182     2012      11        05        310              0.149458       1.497742       4.335662       0.244121   -9999.000000   -9999.000000       0.047300       0.508000
54405     54405     hebei          115.5072       40.4175           78       182     2012      11        06        311              0.150583       0.451111       4.402647       0.219193       0.125000   -9999.000000       0.046700       0.588000
54405     54405     hebei          115.5072       40.4175           78       182     2012      11        07        312              0.153125       0.466217       2.995848       0.220478   -9999.000000   -9999.000000       0.054200       0.679000
54405     54405     hebei          115.5072       40.4175           78       182     2012      11        08        313              0.149042       0.578857       1.483082       0.226165   -9999.000000   -9999.000000   -9999.000000       0.725000
54405     54405     hebei          115.5072       40.4175           78       182     2012      11        09        314              0.149250       0.967926       3.442243       0.225810   -9999.000000   -9999.000000   -9999.000000       0.676000
54405     54405     hebei          115.5072       40.4175           78       182     2012      11        10        315              0.155875       2.060791       4.428859       0.256990   -9999.000000   -9999.000000       0.027100       0.526000
54405     54405     hebei          115.5072       40.4175           78       182     2012      11        11        316              0.098458       0.012756       0.037985       0.222043   -9999.000000   -9999.000000       0.036700       0.423000
54405     54405     hebei          115.5072       40.4175           78       182     2012      11        12        317              0.087583      -2.182281       2.220496       0.150705   -9999.000000   -9999.000000       0.030400       0.458000
54405     54405     hebei          115.5072       40.4175           78       182     2012      11        13        318              0.000000      -1.825256       0.232886       0.157244   -9999.000000       0.157800       0.029500       0.596000
54405     54405     hebei          115.5072       40.4175           78       182     2012      11        14        319              0.052875      -3.216492       0.051450       0.137114   -9999.000000       0.173100       0.036900       0.517000
54405     54405     hebei          115.5072       40.4175           78       182     2012      11        15        320              0.064417      -2.878052       1.055205       0.136314   -9999.000000   -9999.000000       0.025000       0.480000
54405     54405     hebei          115.5072       40.4175           78       182     2012      11        16        321              0.087708      -0.751587       2.011312       0.160433   -9999.000000   -9999.000000       0.020600       0.397000
54405     54405     hebei          115.5072       40.4175           78       182     2012      11        17        322              0.000000      -1.782227       0.546043       0.156205   -9999.000000   -9999.000000       0.033400       0.462000
54405     54405     hebei          115.5072       40.4175           78       182     2012      11        18        323              0.092458      -1.358795       1.574742       0.157672   -9999.000000   -9999.000000       0.026300   -9999.000000
54405     54405     hebei          115.5072       40.4175           78       182     2012      11        19        324              0.082208      -1.216736       0.000000       0.164906   -9999.000000   -9999.000000       0.037100       0.530000
54405     54405     hebei          115.5072       40.4175           78       182     2012      11        20        325              0.081708      -1.622192       0.000000       0.153320   -9999.000000   -9999.000000       0.041500       0.422000
54405     54405     hebei          115.5072       40.4175           78       182     2012      11        21        326              0.094083      -1.021881       0.224064       0.161391   -9999.000000   -9999.000000       0.018000       0.470000
54405     54405     hebei          115.5072       40.4175           78       182     2012      11        22        327              0.096292      -0.068390       1.471443       0.176674   -9999.000000   -9999.000000       0.025300       0.523000
54405     54405     hebei          115.5072       40.4175           78       182     2012      11        23        328              0.052917      -3.668823       1.196872       0.145508   -9999.000000       0.156200       0.013400   -9999.000000
54405     54405     hebei          115.5072       40.4175           78       182     2012      11        24        329              0.052333      -4.104004       0.000000       0.125678   -9999.000000   -9999.000000       0.024500       0.360000
54405     54405     hebei          115.5072       40.4175           78       182     2012      11        25        330              0.049167      -2.521332       0.000000       0.140918   -9999.000000   -9999.000000       0.032000       0.301000
54405     54405     hebei          115.5072       40.4175           78       182     2012      11        26        331              0.046583      -3.193787       0.000000       0.133765   -9999.000000       0.415900   -9999.000000       0.360000
54405     54405     hebei          115.5072       40.4175           78       182     2012      11        27        332              0.051750      -3.643463       0.000000       0.131190   -9999.000000       0.148800       0.018400       0.354000
54405     54405     hebei          115.5072       40.4175           78       182     2012      11        28        333              0.044083      -2.066925       0.000000       0.148455   -9999.000000   -9999.000000       0.027000   -9999.000000
54405     54405     hebei          115.5072       40.4175           78       182     2012      11        29        334              0.040826      -4.934235       0.000000       0.123406   -9999.000000   -9999.000000       0.023500       0.384000
54405     54405     hebei          115.5072       40.4175           78       182     2012      11        30        335              0.035042      -5.722168       0.000000       0.121759   -9999.000000   -9999.000000       0.021400       0.215000
54405     54405     hebei          115.5072       40.4175           78       182     2012      12        01        336              0.033542      -7.487091       0.000000       0.112601   -9999.000000   -9999.000000       0.030500       0.313000
54405     54405     hebei          115.5072       40.4175           78       182     2012      12        02        337              0.034042      -7.610840       0.133619       0.112745   -9999.000000   -9999.000000       0.020800       0.273000
54405     54405     hebei          115.5072       40.4175           78       182     2012      12        03        338              0.033333      -5.673828       0.000000       0.113895   -9999.000000   -9999.000000       0.020400   -9999.000000
54405     54405     hebei          115.5072       40.4175           78       182     2012      12        04        339              0.033458      -7.284943       0.000000       0.112781   -9999.000000   -9999.000000       0.022900       0.244000
54405     54405     hebei          115.5072       40.4175           78       182     2012      12        05        340              0.030042      -6.444275       0.000000       0.112442   -9999.000000   -9999.000000       0.014800       0.271000
54405     54405     hebei          115.5072       40.4175           78       182     2012      12        06        341              0.030292     -10.102570       0.000000       0.110388   -9999.000000   -9999.000000       0.024300       0.269000
54405     54405     hebei          115.5072       40.4175           78       182     2012      12        07        342              0.029458      -8.678009       0.000000       0.110139   -9999.000000   -9999.000000   -9999.000000       0.252000
54405     54405     hebei          115.5072       40.4175           78       182     2012      12        08        343              0.026625     -10.696259       0.000000       0.109033   -9999.000000   -9999.000000       0.014500       0.341000
54405     54405     hebei          115.5072       40.4175           78       182     2012      12        09        344              0.027292     -13.254700       1.071156       0.106741   -9999.000000   -9999.000000       0.024600       0.166000
54405     54405     hebei          115.5072       40.4175           78       182     2012      12        10        345              0.028217     -10.479218       0.000000       0.107316   -9999.000000   -9999.000000       0.016400       0.150000
54405     54405     hebei          115.5072       40.4175           78       182     2012      12        11        346              0.029214      -8.827271       0.000000       0.108011   -9999.000000   -9999.000000       0.019500       0.192000
54405     54405     hebei          115.5072       40.4175           78       182     2012      12        12        347              0.000000      -8.375946       0.000000       0.108195   -9999.000000   -9999.000000       0.028900       0.164000
54405     54405     hebei          115.5072       40.4175           78       182     2012      12        13        348              0.000000      -7.734253       0.597246       0.108925   -9999.000000   -9999.000000       0.018900       0.232000
54405     54405     hebei          115.5072       40.4175           78       182     2012      12        14        349              0.000000      -7.353424       0.484580       0.109129   -9999.000000   -9999.000000       0.014000       0.106000
54405     54405     hebei          115.5072       40.4175           78       182     2012      12        15        350              0.000000      -5.916870       1.117137       0.111785   -9999.000000   -9999.000000       0.021100       0.203000
54405     54405     hebei          115.5072       40.4175           78       182     2012      12        16        351              0.034500      -4.323547       0.111396       0.125964   -9999.000000       0.235500       0.016100       0.269000
54405     54405     hebei          115.5072       40.4175           78       182     2012      12        17        352              0.030208      -5.507477       0.000000       0.119933   -9999.000000   -9999.000000       0.022000   -9999.000000
54405     54405     hebei          115.5072       40.4175           78       182     2012      12        18        353              0.027000     -10.419739       0.000000       0.110576   -9999.000000   -9999.000000       0.021100       0.262000
54405     54405     hebei          115.5072       40.4175           78       182     2012      12        19        354              0.000000     -10.212769       0.000000       0.107916   -9999.000000   -9999.000000       0.012300       0.031000
54405     54405     hebei          115.5072       40.4175           78       182     2012      12        20        355              0.000000      -8.414520       0.368129       0.107903   -9999.000000   -9999.000000       0.020100       0.198000
54405     54405     hebei          115.5072       40.4175           78       182     2012      12        21        356              0.000000      -7.701202       0.000000       0.108066   -9999.000000   -9999.000000       0.015300       0.238000
54405     54405     hebei          115.5072       40.4175           78       182     2012      12        22        357              0.000000     -10.921692       0.000000       0.106587   -9999.000000   -9999.000000       0.010000   -9999.000000
54405     54405     hebei          115.5072       40.4175           78       182     2012      12        23        358              0.000000     -14.313080       0.000000       0.104674   -9999.000000   -9999.000000   -9999.000000       0.246000
54405     54405     hebei          115.5072       40.4175           78       182     2012      12        24        359              0.000000     -16.340607       0.000000       0.101803   -9999.000000   -9999.000000   -9999.000000       0.169000
54405     54405     hebei          115.5072       40.4175           78       182     2012      12        25        360              0.000000     -14.480438       0.000000       0.102228   -9999.000000   -9999.000000       0.010000       0.180000
54405     54405     hebei          115.5072       40.4175           78       182     2012      12        26        361              0.000000     -14.161224       0.000000       0.102104   -9999.000000   -9999.000000       0.018700       0.244000
54405     54405     hebei          115.5072       40.4175           78       182     2012      12        27        362              0.000000     -12.516632       0.000000       0.102367   -9999.000000   -9999.000000       0.017300   -9999.000000
54405     54405     hebei          115.5072       40.4175           78       182     2012      12        28        363              0.000000     -10.444031       0.060886       0.102895   -9999.000000   -9999.000000       0.019800       0.210000
54405     54405     hebei          115.5072       40.4175           78       182     2012      12        29        364              0.000000      -9.776367       0.000000       0.103384   -9999.000000   -9999.000000   -9999.000000   -9999.000000
54405     54405     hebei          115.5072       40.4175           78       182     2012      12        30        365              0.000000     -11.925171       0.000000       0.102825   -9999.000000   -9999.000000       0.018200       0.155000
54405     54405     hebei          115.5072       40.4175           78       182     2012      12        31        366              0.000000     -11.180786       0.026210       0.102389   -9999.000000   -9999.000000       0.010400   -9999.000000
