# Supplementary material for: Research on Fusing Multisatellite Soil Moisture Data Based on Bayesian Model Averaging
Source: Hindawi journal article supplement (doi:10.1155/2018/9310838), 2018-06-25
Supplement: f1 [file 9310838.f1.zip › 2012_sm00-10cm_daily_ZDB_ZHY_54429_366days_allin.txt]

54429     54429     hebei          117.9500       40.2000           79       192     2012      01        01        001              0.000000   -9999.000000       0.000000   -9999.000000   -9999.000000   -9999.000000       0.048600   -9999.000000
54429     54429     hebei          117.9500       40.2000           79       192     2012      01        02        002              0.132750      -7.009003       0.000000       0.113734   -9999.000000   -9999.000000       0.038500       0.095000
54429     54429     hebei          117.9500       40.2000           79       192     2012      01        03        003              0.000000      -6.447632       0.000000       0.114752   -9999.000000   -9999.000000       0.048000       0.035000
54429     54429     hebei          117.9500       40.2000           79       192     2012      01        04        004              0.129250      -7.083679       0.000000       0.114005   -9999.000000   -9999.000000       0.050700       0.067000
54429     54429     hebei          117.9500       40.2000           79       192     2012      01        05        005              0.128667      -7.631927       0.000000       0.113460   -9999.000000   -9999.000000       0.036500   -9999.000000
54429     54429     hebei          117.9500       40.2000           79       192     2012      01        06        006              0.129333      -7.044037       0.000000       0.114490   -9999.000000   -9999.000000       0.051100       0.090000
54429     54429     hebei          117.9500       40.2000           79       192     2012      01        07        007              0.130917      -6.796631       0.000000       0.113782   -9999.000000   -9999.000000       0.042600       0.233000
54429     54429     hebei          117.9500       40.2000           79       192     2012      01        08        008              0.000000      -6.379456       0.000000       0.114162   -9999.000000   -9999.000000       0.042900       0.040000
54429     54429     hebei          117.9500       40.2000           79       192     2012      01        09        009              0.128417      -6.303040       0.000000       0.118859   -9999.000000   -9999.000000       0.050800       0.047000
54429     54429     hebei          117.9500       40.2000           79       192     2012      01        10        010              0.129167      -6.210052       0.000000       0.120900   -9999.000000   -9999.000000       0.049500       0.057000
54429     54429     hebei          117.9500       40.2000           79       192     2012      01        11        011              0.127750      -5.903320       0.000000       0.119954   -9999.000000   -9999.000000       0.039000       0.016000
54429     54429     hebei          117.9500       40.2000           79       192     2012      01        12        012              0.127000      -7.268921       0.000000       0.115396   -9999.000000   -9999.000000       0.052500       0.101000
54429     54429     hebei          117.9500       40.2000           79       192     2012      01        13        013              0.127292      -5.876312       0.000000       0.119505   -9999.000000   -9999.000000       0.037900       0.016000
54429     54429     hebei          117.9500       40.2000           79       192     2012      01        14        014              0.127667      -5.314423       0.000000       0.130524       0.131000   -9999.000000       0.044900       0.024000
54429     54429     hebei          117.9500       40.2000           79       192     2012      01        15        015              0.127917      -5.072632       0.000000       0.133957   -9999.000000   -9999.000000       0.053800       0.076000
54429     54429     hebei          117.9500       40.2000           79       192     2012      01        16        016              0.128833      -4.614777       0.000000       0.132766   -9999.000000   -9999.000000       0.039100       0.281000
54429     54429     hebei          117.9500       40.2000           79       192     2012      01        17        017              0.000000      -3.820648       0.000000       0.132931   -9999.000000   -9999.000000       0.043600       0.112000
54429     54429     hebei          117.9500       40.2000           79       192     2012      01        18        018              0.133583      -3.290009       0.000000       0.138010   -9999.000000   -9999.000000       0.051100       0.064000
54429     54429     hebei          117.9500       40.2000           79       192     2012      01        19        019              0.132875      -3.616730       0.000000       0.139934   -9999.000000   -9999.000000       0.041900   -9999.000000
54429     54429     hebei          117.9500       40.2000           79       192     2012      01        20        020              0.130583      -3.993164       0.000000       0.134980   -9999.000000   -9999.000000       0.047600       0.045000
54429     54429     hebei          117.9500       40.2000           79       192     2012      01        21        021              0.126708      -5.858643       0.000000       0.124119   -9999.000000   -9999.000000   -9999.000000       0.009000
54429     54429     hebei          117.9500       40.2000           79       192     2012      01        22        022              0.124043      -8.239655       0.000000       0.117400   -9999.000000   -9999.000000       0.033200       0.023000
54429     54429     hebei          117.9500       40.2000           79       192     2012      01        23        023              0.122958      -9.719208       0.000000       0.114931   -9999.000000   -9999.000000       0.051400       0.107000
54429     54429     hebei          117.9500       40.2000           79       192     2012      01        24        024              0.122667      -9.310822       0.000000       0.113463   -9999.000000   -9999.000000   -9999.000000   -9999.000000
54429     54429     hebei          117.9500       40.2000           79       192     2012      01        25        025              0.122667      -9.060883       0.000000       0.113530   -9999.000000   -9999.000000       0.045700       0.085000
54429     54429     hebei          117.9500       40.2000           79       192     2012      01        26        026              0.123667      -7.552734       0.000000       0.115849   -9999.000000   -9999.000000       0.052500       0.120000
54429     54429     hebei          117.9500       40.2000           79       192     2012      01        27        027              0.124458      -5.683258       0.000000       0.128582   -9999.000000   -9999.000000       0.051600       0.040000
54429     54429     hebei          117.9500       40.2000           79       192     2012      01        28        028              0.125167      -5.779388       0.000000       0.128008   -9999.000000   -9999.000000       0.038700       0.182000
54429     54429     hebei          117.9500       40.2000           79       192     2012      01        29        029              0.124042      -6.914032       0.000000       0.118845   -9999.000000   -9999.000000       0.052000   -9999.000000
54429     54429     hebei          117.9500       40.2000           79       192     2012      01        30        030              0.125292      -6.974823       0.000000       0.121055   -9999.000000   -9999.000000       0.038000       0.106000
54429     54429     hebei          117.9500       40.2000           79       192     2012      01        31        031              0.126875      -6.542450       0.000000       0.117185   -9999.000000   -9999.000000       0.044500       0.083000
54429     54429     hebei          117.9500       40.2000           79       192     2012      02        01        032              0.122833      -7.874298       0.151569       0.116532   -9999.000000   -9999.000000   -9999.000000       0.069000
54429     54429     hebei          117.9500       40.2000           79       192     2012      02        02        033              0.121833      -9.776672       0.198909       0.114159   -9999.000000   -9999.000000       0.038300       0.112000
54429     54429     hebei          117.9500       40.2000           79       192     2012      02        03        034              0.121917     -10.096100       0.195057       0.112851   -9999.000000   -9999.000000       0.047000   -9999.000000
54429     54429     hebei          117.9500       40.2000           79       192     2012      02        04        035              0.123167      -6.944458       0.000000       0.118301       0.139000   -9999.000000       0.054000       0.067000
54429     54429     hebei          117.9500       40.2000           79       192     2012      02        05        036              0.125667      -5.085999       0.000000       0.131597   -9999.000000   -9999.000000       0.044600       0.104000
54429     54429     hebei          117.9500       40.2000           79       192     2012      02        06        037              0.125125      -4.165680      19.403166       0.138760   -9999.000000   -9999.000000       0.055400       0.095000
54429     54429     hebei          117.9500       40.2000           79       192     2012      02        07        038              0.123250      -7.425720       0.199297       0.123172   -9999.000000   -9999.000000   -9999.000000       0.163000
54429     54429     hebei          117.9500       40.2000           79       192     2012      02        08        039              0.123167      -8.054169       0.245272       0.115255   -9999.000000   -9999.000000       0.042100       0.106000
54429     54429     hebei          117.9500       40.2000           79       192     2012      02        09        040              0.123292      -7.003967       0.245054       0.117723   -9999.000000   -9999.000000       0.056000       0.089000
54429     54429     hebei          117.9500       40.2000           79       192     2012      02        10        041              0.124167      -5.961823       0.000000       0.120219   -9999.000000   -9999.000000       0.044500       0.221000
54429     54429     hebei          117.9500       40.2000           79       192     2012      02        11        042              0.125125      -5.356750       0.000000       0.134809   -9999.000000   -9999.000000       0.045600       0.120000
54429     54429     hebei          117.9500       40.2000           79       192     2012      02        12        043              0.126375      -4.262604       0.000000       0.148788   -9999.000000   -9999.000000       0.058400       0.238000
54429     54429     hebei          117.9500       40.2000           79       192     2012      02        13        044              0.128292      -3.182312       0.000000       0.147421   -9999.000000   -9999.000000   -9999.000000       0.060000
54429     54429     hebei          117.9500       40.2000           79       192     2012      02        14        045              0.128913      -1.903656       0.000000       0.169690       0.115000   -9999.000000       0.036700       0.081000
54429     54429     hebei          117.9500       40.2000           79       192     2012      02        15        046              0.127583      -3.578430       0.289938       0.160540   -9999.000000   -9999.000000       0.057400       0.111000
54429     54429     hebei          117.9500       40.2000           79       192     2012      02        16        047              0.127292      -3.080994       0.199380       0.149995   -9999.000000   -9999.000000       0.031900       0.131000
54429     54429     hebei          117.9500       40.2000           79       192     2012      02        17        048              0.126792      -3.806824       0.000000       0.144308   -9999.000000   -9999.000000       0.053700   -9999.000000
54429     54429     hebei          117.9500       40.2000           79       192     2012      02        18        049              0.125958      -5.252808       0.000000       0.130659   -9999.000000   -9999.000000   -9999.000000       0.131000
54429     54429     hebei          117.9500       40.2000           79       192     2012      02        19        050              0.126667      -4.648651       0.000000       0.142357       0.121000   -9999.000000       0.039300       0.180000
54429     54429     hebei          117.9500       40.2000           79       192     2012      02        20        051              0.128500      -2.600311       0.000000       0.168271       0.122000   -9999.000000       0.051400       0.240000
54429     54429     hebei          117.9500       40.2000           79       192     2012      02        21        052              0.131042      -0.801575       0.000000       0.186556       0.126000   -9999.000000       0.062500       0.214000
54429     54429     hebei          117.9500       40.2000           79       192     2012      02        22        053              0.131917      -0.292786       0.786275       0.189538   -9999.000000   -9999.000000       0.052300   -9999.000000
54429     54429     hebei          117.9500       40.2000           79       192     2012      02        23        054              0.131125      -0.972321       0.000000       0.176291   -9999.000000   -9999.000000       0.057600       0.260000
54429     54429     hebei          117.9500       40.2000           79       192     2012      02        24        055              0.132043      -0.448090       0.000000       0.190453       0.125000   -9999.000000   -9999.000000       0.099000
54429     54429     hebei          117.9500       40.2000           79       192     2012      02        25        056              0.131458      -0.514587       0.000000       0.187479       0.115000   -9999.000000       0.040000       0.125000
54429     54429     hebei          117.9500       40.2000           79       192     2012      02        26        057              0.132625      -1.539948       0.000000       0.179117       0.130000   -9999.000000       0.058800       0.217000
54429     54429     hebei          117.9500       40.2000           79       192     2012      02        27        058              0.133875      -1.258575       0.000000       0.184111       0.118000   -9999.000000   -9999.000000   -9999.000000
54429     54429     hebei          117.9500       40.2000           79       192     2012      02        28        059              0.135833      -0.631866       0.000000       0.186780   -9999.000000   -9999.000000       0.040400       0.280000
54429     54429     hebei          117.9500       40.2000           79       192     2012      02        29        060              0.000000   -9999.000000       0.000000   -9999.000000       0.112000   -9999.000000   -9999.000000   -9999.000000
54429     54429     hebei          117.9500       40.2000           79       192     2012      03        01        061              0.140542       0.358490       0.000000       0.201923   -9999.000000   -9999.000000       0.049400       0.164000
54429     54429     hebei          117.9500       40.2000           79       192     2012      03        02        062              0.145958       0.622528       0.000000       0.209044       0.126000   -9999.000000       0.034600       0.226000
54429     54429     hebei          117.9500       40.2000           79       192     2012      03        03        063              0.150917       1.343811       0.000000       0.219726   -9999.000000   -9999.000000       0.049800   -9999.000000
54429     54429     hebei          117.9500       40.2000           79       192     2012      03        04        064              0.156167       0.431000       0.000000       0.206940   -9999.000000   -9999.000000       0.035700       0.157000
54429     54429     hebei          117.9500       40.2000           79       192     2012      03        05        065              0.160292       1.435059       0.782906       0.216665   -9999.000000   -9999.000000       0.072300       0.375000
54429     54429     hebei          117.9500       40.2000           79       192     2012      03        06        066              0.170250       0.965729       0.000000       0.221480       0.132000   -9999.000000       0.063400       0.179000
54429     54429     hebei          117.9500       40.2000           79       192     2012      03        07        067              0.000000       1.421722       0.000000       0.218735       0.133000   -9999.000000       0.039800       0.251000
54429     54429     hebei          117.9500       40.2000           79       192     2012      03        08        068              0.185083       2.315521       0.000000       0.229137       0.135000   -9999.000000       0.059200       0.149000
54429     54429     hebei          117.9500       40.2000           79       192     2012      03        09        069              0.185000       0.059082       0.000000       0.200552   -9999.000000   -9999.000000       0.062400       0.232000
54429     54429     hebei          117.9500       40.2000           79       192     2012      03        10        070              0.187833       0.588409       0.000000       0.203871   -9999.000000   -9999.000000       0.047900       0.194000
54429     54429     hebei          117.9500       40.2000           79       192     2012      03        11        071              0.184375      -0.336700       0.000000       0.194358       0.122000   -9999.000000       0.061900       0.242000
54429     54429     hebei          117.9500       40.2000           79       192     2012      03        12        072              0.184750      -0.490631       0.000000       0.188916       0.121000   -9999.000000   -9999.000000       0.206000
54429     54429     hebei          117.9500       40.2000           79       192     2012      03        13        073              0.194250       1.364502       0.000000       0.209567       0.130000   -9999.000000       0.045400       0.237000
54429     54429     hebei          117.9500       40.2000           79       192     2012      03        14        074              0.207917       3.374756       0.000000       0.240151   -9999.000000   -9999.000000       0.061400       0.292000
54429     54429     hebei          117.9500       40.2000           79       192     2012      03        15        075              0.216042       4.069275       3.349653       0.240773   -9999.000000   -9999.000000       0.056200       0.357000
54429     54429     hebei          117.9500       40.2000           79       192     2012      03        16        076              0.237750       4.365753       0.000000       0.270507       0.130000   -9999.000000       0.078900       0.604000
54429     54429     hebei          117.9500       40.2000           79       192     2012      03        17        077              0.244000       3.919617       2.318782       0.285924       0.149000   -9999.000000       0.089400   -9999.000000
54429     54429     hebei          117.9500       40.2000           79       192     2012      03        18        078              0.247625       2.748077       2.204050       0.265184       0.166000   -9999.000000       0.056500       0.529000
54429     54429     hebei          117.9500       40.2000           79       192     2012      03        19        079              0.252167       2.352234       0.000000       0.249400       0.161000   -9999.000000       0.051600       0.408000
54429     54429     hebei          117.9500       40.2000           79       192     2012      03        20        080              0.255250       3.604706       0.000000       0.255115   -9999.000000   -9999.000000       0.067300       0.374000
54429     54429     hebei          117.9500       40.2000           79       192     2012      03        21        081              0.260792       4.978729       0.000000       0.269867       0.118000   -9999.000000       0.060600       0.520000
54429     54429     hebei          117.9500       40.2000           79       192     2012      03        22        082              0.267083       6.358551       1.337322       0.283623       0.136000   -9999.000000       0.073900   -9999.000000
54429     54429     hebei          117.9500       40.2000           79       192     2012      03        23        083              0.268417       6.731415       0.178312       0.282921       0.135000   -9999.000000       0.073100       0.437000
54429     54429     hebei          117.9500       40.2000           79       192     2012      03        24        084              0.265542       5.442108       0.000000       0.275494       0.147000   -9999.000000   -9999.000000       0.243000
54429     54429     hebei          117.9500       40.2000           79       192     2012      03        25        085              0.000000       5.407471       0.000000       0.264435   -9999.000000   -9999.000000       0.068400       0.371000
54429     54429     hebei          117.9500       40.2000           79       192     2012      03        26        086              0.261667       6.191010       0.000000       0.267162   -9999.000000   -9999.000000       0.068100   -9999.000000
54429     54429     hebei          117.9500       40.2000           79       192     2012      03        27        087              0.257167       8.682251       0.000000       0.274485       0.122000   -9999.000000       0.056700   -9999.000000
54429     54429     hebei          117.9500       40.2000           79       192     2012      03        28        088              0.253833      11.308258       0.000000       0.273666       0.128000   -9999.000000       0.068400       0.492000
54429     54429     hebei          117.9500       40.2000           79       192     2012      03        29        089              0.250417      11.071381       0.000000       0.271636       0.141000   -9999.000000       0.061100       0.432000
54429     54429     hebei          117.9500       40.2000           79       192     2012      03        30        090              0.246250      12.128571       0.000000       0.267108   -9999.000000   -9999.000000       0.045400       0.355000
54429     54429     hebei          117.9500       40.2000           79       192     2012      03        31        091              0.243875       6.917450       0.000000       0.265246   -9999.000000   -9999.000000       0.065500       0.337000
54429     54429     hebei          117.9500       40.2000           79       192     2012      04        01        092              0.240833       6.740631       0.479470       0.258126       0.120000   -9999.000000       0.053500   -9999.000000
54429     54429     hebei          117.9500       40.2000           79       192     2012      04        02        093              0.241667       6.651459       0.628614       0.263837       0.123000   -9999.000000       0.064300       0.361000
54429     54429     hebei          117.9500       40.2000           79       192     2012      04        03        094              0.240000       5.907684       0.000000       0.268570       0.134000   -9999.000000       0.069600       0.586000
54429     54429     hebei          117.9500       40.2000           79       192     2012      04        04        095              0.237500       8.971466       0.718295       0.266042   -9999.000000   -9999.000000       0.055900       0.349000
54429     54429     hebei          117.9500       40.2000           79       192     2012      04        05        096              0.235875       9.902527       0.459303       0.265564   -9999.000000   -9999.000000       0.053700       0.423000
54429     54429     hebei          117.9500       40.2000           79       192     2012      04        06        097              0.234500       9.212585       0.000000       0.265333       0.114000   -9999.000000       0.069600       0.361000
54429     54429     hebei          117.9500       40.2000           79       192     2012      04        07        098              0.234000       9.290253       0.000000       0.263061       0.129500   -9999.000000       0.054000       0.344000
54429     54429     hebei          117.9500       40.2000           79       192     2012      04        08        099              0.233417      12.062866       1.597644       0.261242       0.126000   -9999.000000       0.068100       0.440000
54429     54429     hebei          117.9500       40.2000           79       192     2012      04        09        100              0.232250      13.708252       0.234560       0.256952       0.121000   -9999.000000       0.072200       0.562000
54429     54429     hebei          117.9500       40.2000           79       192     2012      04        10        101              0.232583      15.972748       5.405008       0.255986       0.182000   -9999.000000       0.066800       0.802000
54429     54429     hebei          117.9500       40.2000           79       192     2012      04        11        102              0.234625      14.159271       0.000000       0.277165       0.118000   -9999.000000       0.073900       0.554000
54429     54429     hebei          117.9500       40.2000           79       192     2012      04        12        103              0.233250      12.233032       0.000000       0.272827       0.127500   -9999.000000       0.053500       0.442000
54429     54429     hebei          117.9500       40.2000           79       192     2012      04        13        104              0.231667      14.978943       0.000000       0.264329       0.117000   -9999.000000       0.061100       0.533000
54429     54429     hebei          117.9500       40.2000           79       192     2012      04        14        105              0.229625      16.144531       0.000000       0.259252       0.126000   -9999.000000       0.069600       0.547000
54429     54429     hebei          117.9500       40.2000           79       192     2012      04        15        106              0.227333      18.292694       0.606647       0.252666       0.128000   -9999.000000       0.069100   -9999.000000
54429     54429     hebei          117.9500       40.2000           79       192     2012      04        16        107              0.223696      14.195465       0.017617       0.256604       0.127000   -9999.000000       0.052500       0.521000
54429     54429     hebei          117.9500       40.2000           79       192     2012      04        17        108              0.221333      14.230286       0.000000       0.250825       0.124000   -9999.000000   -9999.000000       0.447000
54429     54429     hebei          117.9500       40.2000           79       192     2012      04        18        109              0.221083      16.793915       0.000000       0.247867       0.116000   -9999.000000   -9999.000000       0.528000
54429     54429     hebei          117.9500       40.2000           79       192     2012      04        19        110              0.227333      16.873871       0.362695       0.248472       0.155000   -9999.000000       0.060700       0.591000
54429     54429     hebei          117.9500       40.2000           79       192     2012      04        20        111              0.253833      14.225647       0.141895       0.253261       0.170000   -9999.000000   -9999.000000   -9999.000000
54429     54429     hebei          117.9500       40.2000           79       192     2012      04        21        112              0.256333      12.181091       0.000000       0.259613       0.227000   -9999.000000       0.068400       0.818000
54429     54429     hebei          117.9500       40.2000           79       192     2012      04        22        113              0.250292      13.059052       0.000000       0.260956       0.177500   -9999.000000       0.064300       0.516000
54429     54429     hebei          117.9500       40.2000           79       192     2012      04        23        114              0.245042      17.998749       0.000000       0.254813       0.158000   -9999.000000       0.076400       0.545000
54429     54429     hebei          117.9500       40.2000           79       192     2012      04        24        115              0.283333      18.410553      39.860256       0.255062   -9999.000000   -9999.000000       0.087200       1.000000
54429     54429     hebei          117.9500       40.2000           79       192     2012      04        25        116              0.000000      14.099823       0.000000       0.338488       0.224000   -9999.000000       0.100000   -9999.000000
54429     54429     hebei          117.9500       40.2000           79       192     2012      04        26        117              0.266958      12.956146       0.000000       0.315962       0.211000   -9999.000000       0.087100       0.768000
54429     54429     hebei          117.9500       40.2000           79       192     2012      04        27        118              0.255083      14.924744       0.000000       0.302628       0.166000   -9999.000000   -9999.000000       0.539000
54429     54429     hebei          117.9500       40.2000           79       192     2012      04        28        119              0.243000      15.025604       0.000000       0.291005       0.171500   -9999.000000       0.078700       0.656000
54429     54429     hebei          117.9500       40.2000           79       192     2012      04        29        120              0.236042      14.035339       0.000000       0.285749       0.152000   -9999.000000       0.069700       0.662000
54429     54429     hebei          117.9500       40.2000           79       192     2012      04        30        121              0.233875      16.500000       0.000000       0.280949       0.167000   -9999.000000       0.096100   -9999.000000
54429     54429     hebei          117.9500       40.2000           79       192     2012      05        01        122              0.230708      18.467743       0.000000       0.278129       0.287000   -9999.000000       0.096600       0.658000
54429     54429     hebei          117.9500       40.2000           79       192     2012      05        02        123              0.225000      19.771057       0.000000       0.272148       0.238000   -9999.000000       0.095900       0.688000
54429     54429     hebei          117.9500       40.2000           79       192     2012      05        03        124              0.218917      20.911957       0.000000       0.265611       0.233000   -9999.000000       0.076400       0.685000
54429     54429     hebei          117.9500       40.2000           79       192     2012      05        04        125              0.214167      21.915314       0.809223       0.258199   -9999.000000   -9999.000000       0.095800       0.755000
54429     54429     hebei          117.9500       40.2000           79       192     2012      05        05        126              0.209583      20.871277       0.000000       0.259095       0.231000   -9999.000000       0.080000       0.537000
54429     54429     hebei          117.9500       40.2000           79       192     2012      05        06        127              0.204500      20.663940       0.000000       0.249954       0.235000   -9999.000000       0.083300       0.528000
54429     54429     hebei          117.9500       40.2000           79       192     2012      05        07        128              0.200583      21.355774       0.000000       0.242880   -9999.000000   -9999.000000       0.111500       0.561000
54429     54429     hebei          117.9500       40.2000           79       192     2012      05        08        129              0.197042      18.905914       0.000000       0.239532       0.220000   -9999.000000       0.087300       0.555000
54429     54429     hebei          117.9500       40.2000           79       192     2012      05        09        130              0.194417      21.408539       0.000000       0.233581       0.214000   -9999.000000       0.101400       0.563000
54429     54429     hebei          117.9500       40.2000           79       192     2012      05        10        131              0.194708      21.046173      11.534173       0.228407       0.222000   -9999.000000       0.124500       0.496000
54429     54429     hebei          117.9500       40.2000           79       192     2012      05        11        132              0.222292      23.258301       0.972750       0.248915       0.476000   -9999.000000       0.127000       0.946000
54429     54429     hebei          117.9500       40.2000           79       192     2012      05        12        133              0.229750      17.784851       2.970738       0.288034       0.495000   -9999.000000       0.140700       0.653000
54429     54429     hebei          117.9500       40.2000           79       192     2012      05        13        134              0.226750      17.210083       9.602098       0.288503       0.411000   -9999.000000   -9999.000000       0.905000
54429     54429     hebei          117.9500       40.2000           79       192     2012      05        14        135              0.220458      16.948303       0.114816       0.300508       0.373000   -9999.000000       0.137600   -9999.000000
54429     54429     hebei          117.9500       40.2000           79       192     2012      05        15        136              0.211458      16.862762       0.000000       0.289403       0.358000   -9999.000000       0.161100       0.749000
54429     54429     hebei          117.9500       40.2000           79       192     2012      05        16        137              0.205250      16.882416       0.000000       0.276901       0.362000   -9999.000000       0.141200       0.602000
54429     54429     hebei          117.9500       40.2000           79       192     2012      05        17        138              0.200542      17.854156       0.000000       0.269216       0.362000   -9999.000000       0.141100       0.619000
54429     54429     hebei          117.9500       40.2000           79       192     2012      05        18        139              0.196875      19.899933       0.000000       0.261833       0.314500   -9999.000000       0.157000       0.646000
54429     54429     hebei          117.9500       40.2000           79       192     2012      05        19        140              0.202625      22.345520      11.108897       0.255211       0.387500   -9999.000000       0.170600   -9999.000000
54429     54429     hebei          117.9500       40.2000           79       192     2012      05        20        141              0.246458      23.000732       5.796676       0.281863   -9999.000000   -9999.000000       0.147300       0.880000
54429     54429     hebei          117.9500       40.2000           79       192     2012      05        21        142              0.244125      18.260254       0.000000       0.307291       0.476000   -9999.000000       0.211400       0.918000
54429     54429     hebei          117.9500       40.2000           79       192     2012      05        22        143              0.234958      21.391998       0.363034       0.288492       0.500000   -9999.000000       0.181100       0.742000
54429     54429     hebei          117.9500       40.2000           79       192     2012      05        23        144              0.225417      20.447144       0.000000       0.280568   -9999.000000   -9999.000000       0.187100       0.554000
54429     54429     hebei          117.9500       40.2000           79       192     2012      05        24        145              0.215500      20.249817       0.000000       0.269958       0.429000   -9999.000000       0.185100   -9999.000000
54429     54429     hebei          117.9500       40.2000           79       192     2012      05        25        146              0.000000      19.833160       0.000000       0.261428       0.448000   -9999.000000       0.138700       0.650000
54429     54429     hebei          117.9500       40.2000           79       192     2012      05        26        147              0.201417      20.314880       0.000000       0.254149       0.463000   -9999.000000       0.166900       0.709000
54429     54429     hebei          117.9500       40.2000           79       192     2012      05        27        148              0.195792      22.522522       0.000000       0.245683       0.498000   -9999.000000       0.188900       0.610000
54429     54429     hebei          117.9500       40.2000           79       192     2012      05        28        149              0.191833      23.021759       0.000000       0.237596       0.500000   -9999.000000       0.164900       0.739000
54429     54429     hebei          117.9500       40.2000           79       192     2012      05        29        150              0.186417      24.698395       4.294220       0.229127       0.457000   -9999.000000       0.161600   -9999.000000
54429     54429     hebei          117.9500       40.2000           79       192     2012      05        30        151              0.183583      21.465515       0.000000       0.250066       0.448000   -9999.000000   -9999.000000   -9999.000000
54429     54429     hebei          117.9500       40.2000           79       192     2012      05        31        152              0.180167      20.851807       0.550857       0.244271       0.488000   -9999.000000   -9999.000000   -9999.000000
54429     54429     hebei          117.9500       40.2000           79       192     2012      06        01        153              0.176458      21.585449       0.562490       0.234978       0.474000   -9999.000000       0.207500       0.565000
54429     54429     hebei          117.9500       40.2000           79       192     2012      06        02        154              0.178208      18.808014       1.559294       0.242089       0.500000   -9999.000000       0.158900       0.551000
54429     54429     hebei          117.9500       40.2000           79       192     2012      06        03        155              0.176417      22.111450      20.462746       0.235081       0.500000   -9999.000000       0.204600       0.853000
54429     54429     hebei          117.9500       40.2000           79       192     2012      06        04        156              0.178708      18.846130       0.457396       0.318450       0.472500   -9999.000000       0.229000       0.748000
54429     54429     hebei          117.9500       40.2000           79       192     2012      06        05        157              0.177875      22.618286       0.000000       0.288126       0.449000   -9999.000000       0.222000       0.635000
54429     54429     hebei          117.9500       40.2000           79       192     2012      06        06        158              0.210583      24.101990      12.712551       0.273040       0.481000   -9999.000000       0.208800       1.000000
54429     54429     hebei          117.9500       40.2000           79       192     2012      06        07        159              0.265375      23.287048       7.355833       0.308030   -9999.000000   -9999.000000       0.244200       0.687000
54429     54429     hebei          117.9500       40.2000           79       192     2012      06        08        160              0.286917      23.972778       0.195396       0.305125       0.386000   -9999.000000       0.222000       0.733000
54429     54429     hebei          117.9500       40.2000           79       192     2012      06        09        161              0.303333      24.735748      23.220024       0.292979       0.480000   -9999.000000       0.020100       1.000000
54429     54429     hebei          117.9500       40.2000           79       192     2012      06        10        162              0.300652      23.239838       0.000000       0.334508       0.500000   -9999.000000       0.261000       0.720000
54429     54429     hebei          117.9500       40.2000           79       192     2012      06        11        163              0.000000      20.316742       0.000000       0.311126       0.499500   -9999.000000       0.182200       0.586000
54429     54429     hebei          117.9500       40.2000           79       192     2012      06        12        164              0.264750      21.693604       0.336718       0.295696       0.500000   -9999.000000       0.240700   -9999.000000
54429     54429     hebei          117.9500       40.2000           79       192     2012      06        13        165              0.293917      21.858032      57.920662       0.286740       0.477000   -9999.000000       0.299900       0.612000
54429     54429     hebei          117.9500       40.2000           79       192     2012      06        14        166              0.324619      20.478851      10.597762       0.344346       0.500000   -9999.000000       0.293900       0.966000
54429     54429     hebei          117.9500       40.2000           79       192     2012      06        15        167              0.293000      19.719879       0.000000       0.345274       0.465000   -9999.000000       0.272000       0.762000
54429     54429     hebei          117.9500       40.2000           79       192     2012      06        16        168              0.276292      20.794769       1.039490       0.320600       0.489000   -9999.000000   -9999.000000       0.770000
54429     54429     hebei          117.9500       40.2000           79       192     2012      06        17        169              0.264333      23.053467       1.081383       0.310766       0.448000       0.064600       0.192800   -9999.000000
54429     54429     hebei          117.9500       40.2000           79       192     2012      06        18        170              0.255417      24.762573       0.343232       0.301213       0.473000   -9999.000000       0.221300       0.795000
54429     54429     hebei          117.9500       40.2000           79       192     2012      06        19        171              0.248417      24.902191       0.000000       0.295584       0.472000   -9999.000000       0.201000   -9999.000000
54429     54429     hebei          117.9500       40.2000           79       192     2012      06        20        172              0.243292      25.380188       0.343101       0.287841       0.477000   -9999.000000       0.197100       0.737000
54429     54429     hebei          117.9500       40.2000           79       192     2012      06        21        173              0.237333      24.990967       1.964246       0.283562       0.491000   -9999.000000       0.222600       0.614000
54429     54429     hebei          117.9500       40.2000           79       192     2012      06        22        174              0.239667      25.810150       0.064421       0.281543       0.474000   -9999.000000       0.194600   -9999.000000
54429     54429     hebei          117.9500       40.2000           79       192     2012      06        23        175              0.237583      24.672577       0.843844       0.281585       0.500000   -9999.000000       0.179100       0.732000
54429     54429     hebei          117.9500       40.2000           79       192     2012      06        24        176              0.285750      24.079956      32.271790       0.278213       0.479000   -9999.000000       0.216900       1.000000
54429     54429     hebei          117.9500       40.2000           79       192     2012      06        25        177              0.312708      23.680023       2.335224       0.333986       0.495000   -9999.000000       0.220700       1.000000
54429     54429     hebei          117.9500       40.2000           79       192     2012      06        26        178              0.298750      22.804474       1.824098       0.327260       0.495000   -9999.000000       0.237000       1.000000
54429     54429     hebei          117.9500       40.2000           79       192     2012      06        27        179              0.286833      23.946106       0.064135       0.314050       0.481000   -9999.000000       0.228000   -9999.000000
54429     54429     hebei          117.9500       40.2000           79       192     2012      06        28        180              0.300542      24.486542      16.764563       0.302964   -9999.000000   -9999.000000       0.195700       0.824000
54429     54429     hebei          117.9500       40.2000           79       192     2012      06        29        181              0.330417      22.136627       4.380125       0.321813       0.474500   -9999.000000       0.229300   -9999.000000
54429     54429     hebei          117.9500       40.2000           79       192     2012      06        30        182              0.305500      22.423035       0.000000       0.330465       0.480500   -9999.000000       0.181700   -9999.000000
54429     54429     hebei          117.9500       40.2000           79       192     2012      07        01        183              0.292500      25.781250       6.727296       0.308368       0.443000   -9999.000000       0.203500       0.878000
54429     54429     hebei          117.9500       40.2000           79       192     2012      07        02        184              0.277333      26.349731       0.000000       0.298614       0.479500   -9999.000000       0.200500       0.828000
54429     54429     hebei          117.9500       40.2000           79       192     2012      07        03        185              0.262667      26.017792       0.547347       0.289117       0.500000   -9999.000000       0.188600       0.742000
54429     54429     hebei          117.9500       40.2000           79       192     2012      07        04        186              0.253167      26.596161       0.000000       0.282892       0.500000   -9999.000000       0.159900       0.686000
54429     54429     hebei          117.9500       40.2000           79       192     2012      07        05        187              0.249292      26.060883       5.340476       0.276521   -9999.000000   -9999.000000       0.206100       0.729000
54429     54429     hebei          117.9500       40.2000           79       192     2012      07        06        188              0.246792      23.595703       2.955512       0.297359   -9999.000000   -9999.000000       0.184200       0.736000
54429     54429     hebei          117.9500       40.2000           79       192     2012      07        07        189              0.253375      25.873566       0.162890       0.289255   -9999.000000   -9999.000000       0.190500       0.853000
54429     54429     hebei          117.9500       40.2000           79       192     2012      07        08        190              0.262000      26.021179      15.118670       0.292680   -9999.000000   -9999.000000       0.221400       0.871000
54429     54429     hebei          117.9500       40.2000           79       192     2012      07        09        191              0.306958      26.464569       4.158168       0.304159       0.500000       0.053900       0.177100       0.972000
54429     54429     hebei          117.9500       40.2000           79       192     2012      07        10        192              0.329333      24.769562      25.845556       0.322013       0.470000   -9999.000000       0.190300       1.000000
54429     54429     hebei          117.9500       40.2000           79       192     2012      07        11        193              0.333000      24.791168       8.265636       0.346248       0.500000   -9999.000000       0.213200   -9999.000000
54429     54429     hebei          117.9500       40.2000           79       192     2012      07        12        194              0.322583      25.197327       0.223001       0.334735       0.474000   -9999.000000       0.184000       0.842000
54429     54429     hebei          117.9500       40.2000           79       192     2012      07        13        195              0.305125      25.767151       0.000000       0.316104       0.500000   -9999.000000       0.197800       0.810000
54429     54429     hebei          117.9500       40.2000           79       192     2012      07        14        196              0.290208      24.630676       0.000000       0.304453   -9999.000000   -9999.000000   -9999.000000       0.812000
54429     54429     hebei          117.9500       40.2000           79       192     2012      07        15        197              0.271542      24.808228       0.000000       0.295419       0.460000   -9999.000000       0.153900       0.670000
54429     54429     hebei          117.9500       40.2000           79       192     2012      07        16        198              0.260583      25.961029       0.000000       0.287841       0.500000   -9999.000000       0.242600   -9999.000000
54429     54429     hebei          117.9500       40.2000           79       192     2012      07        17        199              0.250625      26.881561       0.000000       0.281600       0.474000   -9999.000000       0.207600       0.695000
54429     54429     hebei          117.9500       40.2000           79       192     2012      07        18        200              0.241000      26.796722       0.000000       0.276596       0.475000   -9999.000000       0.213300       0.694000
54429     54429     hebei          117.9500       40.2000           79       192     2012      07        19        201              0.235083      26.631897       0.071125       0.272107   -9999.000000   -9999.000000       0.245000       0.731000
54429     54429     hebei          117.9500       40.2000           79       192     2012      07        20        202              0.230826      26.842865       0.987757       0.268855   -9999.000000   -9999.000000       0.238700       0.626000
54429     54429     hebei          117.9500       40.2000           79       192     2012      07        21        203              0.297000      27.727753     169.947189       0.266587   -9999.000000   -9999.000000       0.284900   -9999.000000
54429     54429     hebei          117.9500       40.2000           79       192     2012      07        22        204              0.347042      25.492981       7.378623       0.408957   -9999.000000   -9999.000000       0.260600       0.976000
54429     54429     hebei          117.9500       40.2000           79       192     2012      07        23        205              0.321875      25.530365       0.000000       0.383503   -9999.000000   -9999.000000       0.171600       0.892000
54429     54429     hebei          117.9500       40.2000           79       192     2012      07        24        206              0.308333      25.813232       0.000000       0.325291       0.487000   -9999.000000       0.167500       0.819000
54429     54429     hebei          117.9500       40.2000           79       192     2012      07        25        207              0.342208      25.299042      26.877426       0.317946   -9999.000000   -9999.000000       0.203600       1.000000
54429     54429     hebei          117.9500       40.2000           79       192     2012      07        26        208              0.348417      25.058136       5.231411       0.343595       0.486000   -9999.000000       0.164700   -9999.000000
54429     54429     hebei          117.9500       40.2000           79       192     2012      07        27        209              0.352083      25.337677      26.362028       0.337753   -9999.000000   -9999.000000       0.182700       0.867000
54429     54429     hebei          117.9500       40.2000           79       192     2012      07        28        210              0.374958      25.610291      30.482227       0.345130   -9999.000000   -9999.000000       0.192200       0.927000
54429     54429     hebei          117.9500       40.2000           79       192     2012      07        29        211              0.341542      25.558868       0.292272       0.372017   -9999.000000   -9999.000000       0.169000       0.881000
54429     54429     hebei          117.9500       40.2000           79       192     2012      07        30        212              0.327958      26.286316      15.291269       0.348534   -9999.000000   -9999.000000       0.121200       1.000000
54429     54429     hebei          117.9500       40.2000           79       192     2012      07        31        213              0.371167      25.214325      37.250790       0.347172   -9999.000000   -9999.000000   -9999.000000       1.000000
54429     54429     hebei          117.9500       40.2000           79       192     2012      08        01        214              0.378250      21.579468      58.170788       0.371206   -9999.000000   -9999.000000       0.112500       1.000000
54429     54429     hebei          117.9500       40.2000           79       192     2012      08        02        215              0.344042      20.854065       0.199941       0.497917   -9999.000000   -9999.000000       0.125500       0.866000
54429     54429     hebei          117.9500       40.2000           79       192     2012      08        03        216              0.329625      24.402466       0.107010       0.386390   -9999.000000   -9999.000000       0.114700       0.830000
54429     54429     hebei          117.9500       40.2000           79       192     2012      08        04        217              0.316250      24.308167       0.000000       0.344990   -9999.000000   -9999.000000       0.108400       0.814000
54429     54429     hebei          117.9500       40.2000           79       192     2012      08        05        218              0.304750      25.138916       1.407966       0.334897   -9999.000000   -9999.000000       0.121800       0.769000
54429     54429     hebei          117.9500       40.2000           79       192     2012      08        06        219              0.291500      26.180695       0.000000       0.331739   -9999.000000   -9999.000000       0.160800       0.799000
54429     54429     hebei          117.9500       40.2000           79       192     2012      08        07        220              0.285000      26.864410       0.000000       0.324818   -9999.000000   -9999.000000   -9999.000000       0.674000
54429     54429     hebei          117.9500       40.2000           79       192     2012      08        08        221              0.281750      26.993500       2.231376       0.319150   -9999.000000   -9999.000000       0.163800       0.844000
54429     54429     hebei          117.9500       40.2000           79       192     2012      08        09        222              0.281083      25.962921       0.000000       0.320382   -9999.000000   -9999.000000       0.143000   -9999.000000
54429     54429     hebei          117.9500       40.2000           79       192     2012      08        10        223              0.274458      26.776489       0.000000       0.313172   -9999.000000   -9999.000000       0.158400       0.712000
54429     54429     hebei          117.9500       40.2000           79       192     2012      08        11        224              0.268333      26.680939       4.541297       0.308733       0.399000   -9999.000000       0.151400       0.767000
54429     54429     hebei          117.9500       40.2000           79       192     2012      08        12        225              0.280917      25.111176       4.369943       0.312732       0.500000   -9999.000000       0.119200       0.820000
54429     54429     hebei          117.9500       40.2000           79       192     2012      08        13        226              0.273250      24.614014       0.000000       0.313899       0.497000   -9999.000000       0.148500       0.649000
54429     54429     hebei          117.9500       40.2000           79       192     2012      08        14        227              0.265083      24.067627       0.119089       0.306535   -9999.000000   -9999.000000       0.167400   -9999.000000
54429     54429     hebei          117.9500       40.2000           79       192     2012      08        15        228              0.263500      22.101471       0.000000       0.305427       0.500000   -9999.000000       0.139300       0.675000
54429     54429     hebei          117.9500       40.2000           79       192     2012      08        16        229              0.258750      24.437134       0.000000       0.301527       0.500000   -9999.000000       0.158100       0.627000
54429     54429     hebei          117.9500       40.2000           79       192     2012      08        17        230              0.253833      25.210052       0.217344       0.297653       0.500000   -9999.000000   -9999.000000       0.618000
54429     54429     hebei          117.9500       40.2000           79       192     2012      08        18        231              0.249167      24.913300       0.164730       0.296259       0.500000   -9999.000000       0.134200       0.647000
54429     54429     hebei          117.9500       40.2000           79       192     2012      08        19        232              0.247042      25.069031       0.000000       0.295585       0.500000   -9999.000000       0.158200   -9999.000000
54429     54429     hebei          117.9500       40.2000           79       192     2012      08        20        233              0.274875      25.406219      18.741716       0.290529       0.500000   -9999.000000       0.113500       0.671000
54429     54429     hebei          117.9500       40.2000           79       192     2012      08        21        234              0.293292      24.106903       0.000000       0.330328   -9999.000000   -9999.000000       0.130000       0.719000
54429     54429     hebei          117.9500       40.2000           79       192     2012      08        22        235              0.278042      21.781250       0.000000       0.311656       0.493000   -9999.000000       0.144400   -9999.000000
54429     54429     hebei          117.9500       40.2000           79       192     2012      08        23        236              0.267708      20.920441       0.000000       0.301746   -9999.000000   -9999.000000       0.130500       0.638000
54429     54429     hebei          117.9500       40.2000           79       192     2012      08        24        237              0.261125      22.236023       0.000000       0.295999   -9999.000000   -9999.000000       0.123300   -9999.000000
54429     54429     hebei          117.9500       40.2000           79       192     2012      08        25        238              0.000000      22.543365       0.000000       0.291044   -9999.000000   -9999.000000       0.149400   -9999.000000
54429     54429     hebei          117.9500       40.2000           79       192     2012      08        26        239              0.247750      22.830963       1.794848       0.286894   -9999.000000   -9999.000000       0.127700       0.611000
54429     54429     hebei          117.9500       40.2000           79       192     2012      08        27        240              0.245167      24.000580       0.866475       0.287289   -9999.000000   -9999.000000       0.154300       0.670000
54429     54429     hebei          117.9500       40.2000           79       192     2012      08        28        241              0.241917      23.835297       0.000000       0.293055   -9999.000000   -9999.000000       0.144400       0.639000
54429     54429     hebei          117.9500       40.2000           79       192     2012      08        29        242              0.241708      25.649139       0.062912       0.286808   -9999.000000   -9999.000000       0.114900       0.591000
54429     54429     hebei          117.9500       40.2000           79       192     2012      08        30        243              0.235167      25.679749       0.000000       0.283065   -9999.000000   -9999.000000       0.148300       0.541000
54429     54429     hebei          117.9500       40.2000           79       192     2012      08        31        244              0.230125      26.292145       0.000000       0.278958   -9999.000000   -9999.000000       0.153000       0.691000
54429     54429     hebei          117.9500       40.2000           79       192     2012      09        01        245              0.226500      25.824371       2.481772       0.276995   -9999.000000   -9999.000000       0.126000       0.694000
54429     54429     hebei          117.9500       40.2000           79       192     2012      09        02        246              0.226250      26.265808      21.245073       0.280914   -9999.000000   -9999.000000       0.167500       0.840000
54429     54429     hebei          117.9500       40.2000           79       192     2012      09        03        247              0.227167      21.932739       0.328568       0.331707   -9999.000000   -9999.000000       0.142800       0.732000
54429     54429     hebei          117.9500       40.2000           79       192     2012      09        04        248              0.224500      20.757233       0.000000       0.307495       0.486000   -9999.000000       0.125200       0.646000
54429     54429     hebei          117.9500       40.2000           79       192     2012      09        05        249              0.221167      20.043030       0.000000       0.298145       0.500000   -9999.000000       0.151100       0.558000
54429     54429     hebei          117.9500       40.2000           79       192     2012      09        06        250              0.222583      20.294495      11.106742       0.292046   -9999.000000   -9999.000000       0.131200       0.657000
54429     54429     hebei          117.9500       40.2000           79       192     2012      09        07        251              0.354250      20.929962      21.765289       0.302818   -9999.000000   -9999.000000       0.146800   -9999.000000
54429     54429     hebei          117.9500       40.2000           79       192     2012      09        08        252              0.337250      19.323700       0.000000       0.346327       0.500000   -9999.000000       0.158800       0.806000
54429     54429     hebei          117.9500       40.2000           79       192     2012      09        09        253              0.323292      21.792023       0.000000       0.319765       0.500000   -9999.000000       0.135000       0.790000
54429     54429     hebei          117.9500       40.2000           79       192     2012      09        10        254              0.311208      22.846130       0.000000       0.309060       0.500000   -9999.000000       0.192200       0.749000
54429     54429     hebei          117.9500       40.2000           79       192     2012      09        11        255              0.336667      23.164612      16.891676       0.302389   -9999.000000   -9999.000000       0.223800       0.990000
54429     54429     hebei          117.9500       40.2000           79       192     2012      09        12        256              0.342625      20.784485       0.000000       0.329229   -9999.000000   -9999.000000       0.201000   -9999.000000
54429     54429     hebei          117.9500       40.2000           79       192     2012      09        13        257              0.325417      18.931854       0.000000       0.318134   -9999.000000   -9999.000000       0.221300       0.737000
54429     54429     hebei          117.9500       40.2000           79       192     2012      09        14        258              0.312417      17.944153       0.000000       0.307552   -9999.000000   -9999.000000       0.216600       0.754000
54429     54429     hebei          117.9500       40.2000           79       192     2012      09        15        259              0.302083      18.611053       0.375714       0.301564   -9999.000000       0.108800       0.160200       0.662000
54429     54429     hebei          117.9500       40.2000           79       192     2012      09        16        260              0.294375      18.428589       0.000000       0.297798   -9999.000000   -9999.000000       0.217900       0.545000
54429     54429     hebei          117.9500       40.2000           79       192     2012      09        17        261              0.285333      18.357056       0.000000       0.295216   -9999.000000   -9999.000000       0.198700   -9999.000000
54429     54429     hebei          117.9500       40.2000           79       192     2012      09        18        262              0.276583      18.591766       0.000000       0.291812       0.485000   -9999.000000       0.197000       0.644000
54429     54429     hebei          117.9500       40.2000           79       192     2012      09        19        263              0.269208      19.131317       0.000000       0.289116   -9999.000000   -9999.000000       0.226700       0.560000
54429     54429     hebei          117.9500       40.2000           79       192     2012      09        20        264              0.265042      19.525360       0.000000       0.286943   -9999.000000   -9999.000000       0.214000       0.639000
54429     54429     hebei          117.9500       40.2000           79       192     2012      09        21        265              0.262000      19.934967       0.269364       0.285220   -9999.000000   -9999.000000       0.180700       0.581000
54429     54429     hebei          117.9500       40.2000           79       192     2012      09        22        266              0.257583      20.117462       0.000000       0.284529       0.472000   -9999.000000       0.228100   -9999.000000
54429     54429     hebei          117.9500       40.2000           79       192     2012      09        23        267              0.253667      19.993042       0.782727       0.282988       0.477000   -9999.000000       0.196800       0.643000
54429     54429     hebei          117.9500       40.2000           79       192     2012      09        24        268              0.250000      20.233215       0.000000       0.284130       0.487000   -9999.000000       0.242800       0.677000
54429     54429     hebei          117.9500       40.2000           79       192     2012      09        25        269              0.248625      20.034729       2.046104       0.283315       0.500000   -9999.000000       0.287600       0.491000
54429     54429     hebei          117.9500       40.2000           79       192     2012      09        26        270              0.246833      18.886566       0.000000       0.288740       0.500000   -9999.000000       0.217400       0.674000
54429     54429     hebei          117.9500       40.2000           79       192     2012      09        27        271              0.247000      19.038330       5.169188       0.286701       0.483000   -9999.000000       0.251900       0.577000
54429     54429     hebei          117.9500       40.2000           79       192     2012      09        28        272              0.245000      15.562866       0.050285       0.301555       0.500000   -9999.000000       0.271700       0.550000
54429     54429     hebei          117.9500       40.2000           79       192     2012      09        29        273              0.241875      14.714539       0.000000       0.292319       0.463500   -9999.000000       0.236300       0.785000
54429     54429     hebei          117.9500       40.2000           79       192     2012      09        30        274              0.239000      14.988190       0.000000       0.289295       0.488000   -9999.000000       0.286400       0.572000
54429     54429     hebei          117.9500       40.2000           79       192     2012      10        01        275              0.237000      15.481415       0.000000       0.287942       0.385000   -9999.000000   -9999.000000       0.574000
54429     54429     hebei          117.9500       40.2000           79       192     2012      10        02        276              0.236000      16.410004       0.000000       0.286301       0.384000   -9999.000000       0.198200       0.447000
54429     54429     hebei          117.9500       40.2000           79       192     2012      10        03        277              0.234875      16.995209       0.000000       0.285299       0.423000   -9999.000000       0.246400       0.491000
54429     54429     hebei          117.9500       40.2000           79       192     2012      10        04        278              0.232417      16.026123       0.000000       0.284202       0.492000   -9999.000000       0.223000       0.659000
54429     54429     hebei          117.9500       40.2000           79       192     2012      10        05        279              0.230375      16.064148       0.000000       0.282936       0.406500   -9999.000000       0.223900       0.784000
54429     54429     hebei          117.9500       40.2000           79       192     2012      10        06        280              0.229250      16.331940       0.000000       0.282526       0.428000   -9999.000000       0.267400   -9999.000000
54429     54429     hebei          117.9500       40.2000           79       192     2012      10        07        281              0.228000      16.296967       0.000000       0.281986       0.410000   -9999.000000       0.248300       0.545000
54429     54429     hebei          117.9500       40.2000           79       192     2012      10        08        282              0.228000      16.430878       6.857774       0.281629       0.430000   -9999.000000       0.169900       0.477000
54429     54429     hebei          117.9500       40.2000           79       192     2012      10        09        283              0.229250      16.952728       3.207836       0.289087   -9999.000000   -9999.000000       0.210400       1.000000
54429     54429     hebei          117.9500       40.2000           79       192     2012      10        10        284              0.228000      14.433105       0.000000       0.310986       0.394000   -9999.000000       0.168000       0.432000
54429     54429     hebei          117.9500       40.2000           79       192     2012      10        11        285              0.227478      12.992340       0.000000       0.297854       0.245000   -9999.000000       0.211000   -9999.000000
54429     54429     hebei          117.9500       40.2000           79       192     2012      10        12        286              0.227750      13.080383       0.000000       0.293958       0.300000       0.279100       0.210700       0.522000
54429     54429     hebei          117.9500       40.2000           79       192     2012      10        13        287              0.225250      14.590179       0.000000       0.292307       0.273000   -9999.000000       0.142900       0.459000
54429     54429     hebei          117.9500       40.2000           79       192     2012      10        14        288              0.223333      11.840302       0.000000       0.289588       0.341000   -9999.000000       0.184600       0.421000
54429     54429     hebei          117.9500       40.2000           79       192     2012      10        15        289              0.225833      11.735199       0.131585       0.288684       0.280000   -9999.000000       0.182200       0.657000
54429     54429     hebei          117.9500       40.2000           79       192     2012      10        16        290              0.245542      12.863434      15.858545       0.289832       0.313000   -9999.000000       0.178600   -9999.000000
54429     54429     hebei          117.9500       40.2000           79       192     2012      10        17        291              0.257583       9.631134       0.000000       0.330343       0.332000       0.105200       0.204800       0.626000
54429     54429     hebei          117.9500       40.2000           79       192     2012      10        18        292              0.256167       8.941711       0.000000       0.308664       0.358000   -9999.000000   -9999.000000       0.609000
54429     54429     hebei          117.9500       40.2000           79       192     2012      10        19        293              0.254500      10.412964       0.000000       0.303550       0.335000   -9999.000000       0.140100       0.611000
54429     54429     hebei          117.9500       40.2000           79       192     2012      10        20        294              0.252000      11.039215       0.000000       0.300571       0.354000   -9999.000000       0.180300       0.449000
54429     54429     hebei          117.9500       40.2000           79       192     2012      10        21        295              0.289625      12.018524      23.663431       0.298415       0.210000   -9999.000000       0.192800   -9999.000000
54429     54429     hebei          117.9500       40.2000           79       192     2012      10        22        296              0.318792       9.527130       0.076256       0.333739   -9999.000000   -9999.000000       0.138500       0.674000
54429     54429     hebei          117.9500       40.2000           79       192     2012      10        23        297              0.308125       9.326721       0.000000       0.322704   -9999.000000   -9999.000000       0.154200       0.674000
54429     54429     hebei          117.9500       40.2000           79       192     2012      10        24        298              0.301542      10.283020       0.000000       0.313100   -9999.000000   -9999.000000       0.118600       0.726000
54429     54429     hebei          117.9500       40.2000           79       192     2012      10        25        299              0.000000      11.281738       0.000000       0.308189       0.232000   -9999.000000       0.111400       0.613000
54429     54429     hebei          117.9500       40.2000           79       192     2012      10        26        300              0.296583      12.035706       8.638304       0.304776       0.183000   -9999.000000       0.148100       0.573000
54429     54429     hebei          117.9500       40.2000           79       192     2012      10        27        301              0.303542      12.927643       0.000000       0.315094       0.226000   -9999.000000       0.129300       0.563000
54429     54429     hebei          117.9500       40.2000           79       192     2012      10        28        302              0.000000      12.195282       0.000000       0.314263       0.217000   -9999.000000       0.159300       0.627000
54429     54429     hebei          117.9500       40.2000           79       192     2012      10        29        303              0.293042      10.217194       0.032267       0.306432       0.229000   -9999.000000       0.114400       0.642000
54429     54429     hebei          117.9500       40.2000           79       192     2012      10        30        304              0.287583       7.799652       0.000000       0.304145   -9999.000000   -9999.000000       0.069500       0.432000
54429     54429     hebei          117.9500       40.2000           79       192     2012      10        31        305              0.284500       6.763824       0.000000       0.300888   -9999.000000   -9999.000000       0.102800       0.424000
54429     54429     hebei          117.9500       40.2000           79       192     2012      11        01        306              0.281500       6.125153       0.000000       0.298359       0.182000   -9999.000000       0.077200       0.526000
54429     54429     hebei          117.9500       40.2000           79       192     2012      11        02        307              0.280500       7.081940       0.000000       0.298094       0.189000   -9999.000000       0.092100       0.639000
54429     54429     hebei          117.9500       40.2000           79       192     2012      11        03        308              0.324167       8.241302      49.704220       0.297710       0.208000   -9999.000000       0.113400       1.000000
54429     54429     hebei          117.9500       40.2000           79       192     2012      11        04        309              0.361208       9.540131      13.411452       0.342191   -9999.000000       0.157700       0.110800   -9999.000000
54429     54429     hebei          117.9500       40.2000           79       192     2012      11        05        310              0.336083       6.040314       0.000000       0.349618   -9999.000000   -9999.000000       0.075600       0.810000
54429     54429     hebei          117.9500       40.2000           79       192     2012      11        06        311              0.327167       6.291656       2.218827       0.325954       0.217000   -9999.000000       0.093600       0.682000
54429     54429     hebei          117.9500       40.2000           79       192     2012      11        07        312              0.321250       6.233856       0.057066       0.317843       0.217000   -9999.000000       0.089700       0.666000
54429     54429     hebei          117.9500       40.2000           79       192     2012      11        08        313              0.316625       6.426849       0.342210       0.313643       0.241000   -9999.000000   -9999.000000       0.696000
54429     54429     hebei          117.9500       40.2000           79       192     2012      11        09        314              0.313250       6.012085       0.262554       0.310891       0.231000   -9999.000000       0.107900   -9999.000000
54429     54429     hebei          117.9500       40.2000           79       192     2012      11        10        315              0.343208       6.034241      27.185188       0.309758   -9999.000000   -9999.000000       0.072500       0.617000
54429     54429     hebei          117.9500       40.2000           79       192     2012      11        11        316              0.339667       4.731354       1.318523       0.336085   -9999.000000   -9999.000000       0.069300       0.817000
54429     54429     hebei          117.9500       40.2000           79       192     2012      11        12        317              0.328583       3.284119       0.000000       0.335031       0.198000   -9999.000000       0.067400       0.428000
54429     54429     hebei          117.9500       40.2000           79       192     2012      11        13        318              0.000000       2.508545       0.000000       0.318534       0.211000   -9999.000000       0.066200       0.537000
54429     54429     hebei          117.9500       40.2000           79       192     2012      11        14        319              0.315000       1.611877       0.163986       0.284630   -9999.000000   -9999.000000       0.082600   -9999.000000
54429     54429     hebei          117.9500       40.2000           79       192     2012      11        15        320              0.312875       1.525543       3.196821       0.274591   -9999.000000   -9999.000000   -9999.000000       0.539000
54429     54429     hebei          117.9500       40.2000           79       192     2012      11        16        321              0.321167       1.671417       0.410402       0.289165   -9999.000000   -9999.000000       0.046400       0.544000
54429     54429     hebei          117.9500       40.2000           79       192     2012      11        17        322              0.000000       1.551392       0.000000       0.289491       0.192000   -9999.000000       0.069300       0.424000
54429     54429     hebei          117.9500       40.2000           79       192     2012      11        18        323              0.313625       1.651825       0.000000       0.277929       0.193000   -9999.000000       0.064400       0.467000
54429     54429     hebei          117.9500       40.2000           79       192     2012      11        19        324              0.309500       1.684082       0.000000       0.280816       0.207000   -9999.000000       0.063300   -9999.000000
54429     54429     hebei          117.9500       40.2000           79       192     2012      11        20        325              0.305333       1.479004       0.000000       0.267408       0.192000   -9999.000000       0.078000       0.398000
54429     54429     hebei          117.9500       40.2000           79       192     2012      11        21        326              0.304750       1.573395       0.000000       0.271758   -9999.000000   -9999.000000       0.066700       0.684000
54429     54429     hebei          117.9500       40.2000           79       192     2012      11        22        327              0.303750       1.902649       0.526395       0.279149   -9999.000000   -9999.000000       0.042300       0.443000
54429     54429     hebei          117.9500       40.2000           79       192     2012      11        23        328              0.301167       0.995270       0.000000       0.253951       0.151000   -9999.000000       0.063800       0.247000
54429     54429     hebei          117.9500       40.2000           79       192     2012      11        24        329              0.297750      -0.305023       0.000000       0.209961       0.151000   -9999.000000       0.051500       0.369000
54429     54429     hebei          117.9500       40.2000           79       192     2012      11        25        330              0.295000      -0.019958       0.000000       0.205288   -9999.000000   -9999.000000       0.068800       0.327000
54429     54429     hebei          117.9500       40.2000           79       192     2012      11        26        331              0.292500      -0.365784       0.000000       0.193377   -9999.000000   -9999.000000       0.063700       0.470000
54429     54429     hebei          117.9500       40.2000           79       192     2012      11        27        332              0.288500      -0.983154       0.000000       0.181966   -9999.000000   -9999.000000       0.039200       0.407000
54429     54429     hebei          117.9500       40.2000           79       192     2012      11        28        333              0.288000      -0.040802       0.000000       0.189898       0.147000   -9999.000000       0.050900       0.207000
54429     54429     hebei          117.9500       40.2000           79       192     2012      11        29        334              0.285750      -1.640289       0.000000       0.172569   -9999.000000   -9999.000000       0.057600       0.192000
54429     54429     hebei          117.9500       40.2000           79       192     2012      11        30        335              0.278333      -1.848755       0.000000       0.161821   -9999.000000   -9999.000000       0.042900       0.137000
54429     54429     hebei          117.9500       40.2000           79       192     2012      12        01        336              0.265417      -4.293091       0.218701       0.132993   -9999.000000   -9999.000000       0.059300       0.213000
54429     54429     hebei          117.9500       40.2000           79       192     2012      12        02        337              0.263917      -3.856537       0.179493       0.127824   -9999.000000   -9999.000000   -9999.000000       0.121000
54429     54429     hebei          117.9500       40.2000           79       192     2012      12        03        338              0.264000      -2.545227       0.000000       0.135348   -9999.000000   -9999.000000       0.042200   -9999.000000
54429     54429     hebei          117.9500       40.2000           79       192     2012      12        04        339              0.247208      -3.920441       0.000000       0.137619   -9999.000000   -9999.000000       0.058100       0.235000
54429     54429     hebei          117.9500       40.2000           79       192     2012      12        05        340              0.215625      -3.751709       0.000000       0.136011   -9999.000000   -9999.000000       0.041200       0.082000
54429     54429     hebei          117.9500       40.2000           79       192     2012      12        06        341              0.173125      -6.606812       0.000000       0.123557   -9999.000000   -9999.000000       0.043800       0.115000
54429     54429     hebei          117.9500       40.2000           79       192     2012      12        07        342              0.159167      -6.926208       0.000000       0.120358   -9999.000000   -9999.000000       0.055900       0.048000
54429     54429     hebei          117.9500       40.2000           79       192     2012      12        08        343              0.151333      -6.839325       0.000000       0.119933   -9999.000000   -9999.000000       0.049200   -9999.000000
54429     54429     hebei          117.9500       40.2000           79       192     2012      12        09        344              0.149875      -8.212189       0.000000       0.118276   -9999.000000   -9999.000000       0.042200       0.175000
54429     54429     hebei          117.9500       40.2000           79       192     2012      12        10        345              0.151708      -5.407898       0.000000       0.119799   -9999.000000   -9999.000000       0.047900       0.193000
54429     54429     hebei          117.9500       40.2000           79       192     2012      12        11        346              0.150250      -5.597534       0.000000       0.119672   -9999.000000   -9999.000000       0.024500       0.079000
54429     54429     hebei          117.9500       40.2000           79       192     2012      12        12        347              0.151417      -5.500183       0.100002       0.120251   -9999.000000   -9999.000000       0.049600       0.234000
54429     54429     hebei          117.9500       40.2000           79       192     2012      12        13        348              0.156250      -5.227722       1.835979       0.119808   -9999.000000   -9999.000000       0.053700   -9999.000000
54429     54429     hebei          117.9500       40.2000           79       192     2012      12        14        349              0.163833      -3.351837       0.619717       0.123879   -9999.000000   -9999.000000       0.018800       0.104000
54429     54429     hebei          117.9500       40.2000           79       192     2012      12        15        350              0.000000      -2.255646       1.862627       0.135749   -9999.000000   -9999.000000       0.051100       0.561000
54429     54429     hebei          117.9500       40.2000           79       192     2012      12        16        351              0.181167      -1.308411       0.131998       0.156593   -9999.000000   -9999.000000       0.047200       0.122000
54429     54429     hebei          117.9500       40.2000           79       192     2012      12        17        352              0.166417      -3.277618       0.000000       0.134194   -9999.000000   -9999.000000       0.035200       0.169000
54429     54429     hebei          117.9500       40.2000           79       192     2012      12        18        353              0.149875      -6.266357       0.000000       0.123630   -9999.000000   -9999.000000       0.056100   -9999.000000
54429     54429     hebei          117.9500       40.2000           79       192     2012      12        19        354              0.147458      -7.372894       0.000000       0.119357   -9999.000000   -9999.000000       0.055200       0.067000
54429     54429     hebei          117.9500       40.2000           79       192     2012      12        20        355              0.000000      -7.333313       0.667124       0.119004   -9999.000000   -9999.000000       0.036600       0.464000
54429     54429     hebei          117.9500       40.2000           79       192     2012      12        21        356              0.149458      -5.750854       0.000000       0.119645   -9999.000000   -9999.000000       0.056100       0.191000
54429     54429     hebei          117.9500       40.2000           79       192     2012      12        22        357              0.143917      -5.188843       0.000000       0.124785   -9999.000000   -9999.000000       0.041100       0.203000
54429     54429     hebei          117.9500       40.2000           79       192     2012      12        23        358              0.138542      -8.016907       0.000000       0.118330   -9999.000000   -9999.000000   -9999.000000       0.113000
54429     54429     hebei          117.9500       40.2000           79       192     2012      12        24        359              0.135722     -12.504669       0.000000       0.113462   -9999.000000   -9999.000000       0.049100       0.073000
54429     54429     hebei          117.9500       40.2000           79       192     2012      12        25        360              0.135083     -10.581482       0.000000       0.112847   -9999.000000   -9999.000000       0.034500       0.162000
54429     54429     hebei          117.9500       40.2000           79       192     2012      12        26        361              0.000000     -11.021576       0.000000       0.112817   -9999.000000   -9999.000000       0.038600       0.036000
54429     54429     hebei          117.9500       40.2000           79       192     2012      12        27        362              0.134100     -10.406097       0.000000       0.112907   -9999.000000   -9999.000000       0.049400       0.039000
54429     54429     hebei          117.9500       40.2000           79       192     2012      12        28        363              0.136000      -8.702209       1.799267       0.113680   -9999.000000   -9999.000000       0.031800       0.013000
54429     54429     hebei          117.9500       40.2000           79       192     2012      12        29        364              0.000000      -6.727203       0.000000       0.114943   -9999.000000   -9999.000000   -9999.000000   -9999.000000
54429     54429     hebei          117.9500       40.2000           79       192     2012      12        30        365              0.000000      -9.194031       0.000000       0.114010   -9999.000000   -9999.000000       0.045300       0.046000
54429     54429     hebei          117.9500       40.2000           79       192     2012      12        31        366              0.133800     -10.104431       0.000000       0.112675   -9999.000000   -9999.000000       0.027300   -9999.000000
