# Supplementary material for: Research on Fusing Multisatellite Soil Moisture Data Based on Bayesian Model Averaging
Source: Hindawi journal article supplement (doi:10.1155/2018/9310838), 2018-06-25
Supplement: f1 [file 9310838.f1.zip › 2012_sm00-10cm_daily_ZDB_ZHY_54430_366days_allin.txt]

54430     54430     hebei          118.1381       40.7486           77       193     2012      01        01        001              0.000000   -9999.000000       0.000000   -9999.000000   -9999.000000   -9999.000000       0.047800   -9999.000000
54430     54430     hebei          118.1381       40.7486           77       193     2012      01        02        002              0.031833      -9.013092       0.000000       0.115329   -9999.000000   -9999.000000       0.039200       0.066000
54430     54430     hebei          118.1381       40.7486           77       193     2012      01        03        003              0.000000      -7.883179       0.000000       0.115476   -9999.000000   -9999.000000       0.047700       0.018000
54430     54430     hebei          118.1381       40.7486           77       193     2012      01        04        004              0.030750      -8.635437       0.000000       0.115371   -9999.000000   -9999.000000       0.048000       0.180000
54430     54430     hebei          118.1381       40.7486           77       193     2012      01        05        005              0.030500      -9.474121       0.000000       0.115130   -9999.000000   -9999.000000       0.038400   -9999.000000
54430     54430     hebei          118.1381       40.7486           77       193     2012      01        06        006              0.030333      -9.631561       0.000000       0.115316   -9999.000000   -9999.000000       0.051400       0.072000
54430     54430     hebei          118.1381       40.7486           77       193     2012      01        07        007              0.030417     -10.008575       0.000000       0.114991   -9999.000000   -9999.000000       0.040100       0.063000
54430     54430     hebei          118.1381       40.7486           77       193     2012      01        08        008              0.000000      -9.668152       0.000000       0.115057   -9999.000000   -9999.000000       0.044900       0.058000
54430     54430     hebei          118.1381       40.7486           77       193     2012      01        09        009              0.030500      -8.873596       0.000000       0.115265   -9999.000000   -9999.000000       0.050900       0.157000
54430     54430     hebei          118.1381       40.7486           77       193     2012      01        10        010              0.030583      -9.118713       0.000000       0.114804   -9999.000000   -9999.000000       0.049400       0.044000
54430     54430     hebei          118.1381       40.7486           77       193     2012      01        11        011              0.030250      -9.041260       0.000000       0.114581   -9999.000000   -9999.000000       0.041500       0.062000
54430     54430     hebei          118.1381       40.7486           77       193     2012      01        12        012              0.030000     -10.424072       0.000000       0.113969   -9999.000000   -9999.000000       0.050800       0.105000
54430     54430     hebei          118.1381       40.7486           77       193     2012      01        13        013              0.030292      -9.246368       0.000000       0.114291   -9999.000000   -9999.000000       0.044300       0.080000
54430     54430     hebei          118.1381       40.7486           77       193     2012      01        14        014              0.030333      -8.558441       0.000000       0.114745   -9999.000000   -9999.000000       0.046000       0.060000
54430     54430     hebei          118.1381       40.7486           77       193     2012      01        15        015              0.030167      -8.561768       0.000000       0.114653   -9999.000000   -9999.000000       0.051700       0.018000
54430     54430     hebei          118.1381       40.7486           77       193     2012      01        16        016              0.030250      -8.361938       0.000000       0.114701   -9999.000000   -9999.000000       0.046100       0.019000
54430     54430     hebei          118.1381       40.7486           77       193     2012      01        17        017              0.000000      -7.911652       0.000000       0.115154   -9999.000000   -9999.000000       0.049300       0.027000
54430     54430     hebei          118.1381       40.7486           77       193     2012      01        18        018              0.030500      -7.595001       0.000000       0.115599   -9999.000000   -9999.000000       0.052000       0.129000
54430     54430     hebei          118.1381       40.7486           77       193     2012      01        19        019              0.030417      -8.065582       0.000000       0.115274   -9999.000000   -9999.000000       0.045100       0.143000
54430     54430     hebei          118.1381       40.7486           77       193     2012      01        20        020              0.030583      -8.112000       0.000000       0.115285   -9999.000000   -9999.000000       0.051100       0.007000
54430     54430     hebei          118.1381       40.7486           77       193     2012      01        21        021              0.029833      -9.477081       0.000000       0.114519   -9999.000000   -9999.000000       0.050000       0.066000
54430     54430     hebei          118.1381       40.7486           77       193     2012      01        22        022              0.029333     -11.677917       0.000000       0.113126   -9999.000000   -9999.000000       0.038600       0.011000
54430     54430     hebei          118.1381       40.7486           77       193     2012      01        23        023              0.028667     -12.263123       0.000000       0.112651   -9999.000000   -9999.000000       0.052300       0.129000
54430     54430     hebei          118.1381       40.7486           77       193     2012      01        24        024              0.028500     -11.927246       0.000000       0.112392   -9999.000000   -9999.000000   -9999.000000   -9999.000000
54430     54430     hebei          118.1381       40.7486           77       193     2012      01        25        025              0.028292     -11.693909       0.000000       0.112362   -9999.000000   -9999.000000       0.048100       0.096000
54430     54430     hebei          118.1381       40.7486           77       193     2012      01        26        026              0.028542     -11.237061       0.000000       0.112476   -9999.000000   -9999.000000       0.054000       0.082000
54430     54430     hebei          118.1381       40.7486           77       193     2012      01        27        027              0.028750      -9.477936       0.000000       0.113148   -9999.000000   -9999.000000       0.054500       0.051000
54430     54430     hebei          118.1381       40.7486           77       193     2012      01        28        028              0.028625      -9.427917       0.000000       0.113124   -9999.000000   -9999.000000       0.042600       0.067000
54430     54430     hebei          118.1381       40.7486           77       193     2012      01        29        029              0.028125     -10.084564       0.000000       0.113009   -9999.000000   -9999.000000       0.052700   -9999.000000
54430     54430     hebei          118.1381       40.7486           77       193     2012      01        30        030              0.028583     -10.936066       0.000000       0.112317   -9999.000000   -9999.000000       0.046600       0.140000
54430     54430     hebei          118.1381       40.7486           77       193     2012      01        31        031              0.029292      -9.629028       0.000000       0.112974   -9999.000000   -9999.000000       0.047500       0.074000
54430     54430     hebei          118.1381       40.7486           77       193     2012      02        01        032              0.028500     -10.460876       0.000000       0.113046   -9999.000000   -9999.000000   -9999.000000       0.084000
54430     54430     hebei          118.1381       40.7486           77       193     2012      02        02        033              0.027750     -11.732239       0.000000       0.112278   -9999.000000   -9999.000000       0.045500       0.179000
54430     54430     hebei          118.1381       40.7486           77       193     2012      02        03        034              0.027917     -12.214478       0.123548       0.111851   -9999.000000   -9999.000000       0.049300   -9999.000000
54430     54430     hebei          118.1381       40.7486           77       193     2012      02        04        035              0.028875      -9.869781       0.000000       0.112540   -9999.000000   -9999.000000       0.054700       0.109000
54430     54430     hebei          118.1381       40.7486           77       193     2012      02        05        036              0.029417      -8.142731       0.000000       0.113412   -9999.000000   -9999.000000       0.047800       0.111000
54430     54430     hebei          118.1381       40.7486           77       193     2012      02        06        037              0.029250      -6.858093       0.000000       0.115910   -9999.000000   -9999.000000       0.052200       0.068000
54430     54430     hebei          118.1381       40.7486           77       193     2012      02        07        038              0.029000      -9.989380       0.000000       0.113138   -9999.000000   -9999.000000       0.054200       0.138000
54430     54430     hebei          118.1381       40.7486           77       193     2012      02        08        039              0.029000      -9.955475       0.000000       0.112463   -9999.000000   -9999.000000       0.043500       0.071000
54430     54430     hebei          118.1381       40.7486           77       193     2012      02        09        040              0.029042      -8.948303       0.000000       0.112591   -9999.000000   -9999.000000       0.053100       0.050000
54430     54430     hebei          118.1381       40.7486           77       193     2012      02        10        041              0.028875      -7.118378       0.061802       0.115267   -9999.000000   -9999.000000       0.044600       0.112000
54430     54430     hebei          118.1381       40.7486           77       193     2012      02        11        042              0.028833      -6.976776       0.000000       0.118617   -9999.000000   -9999.000000       0.047100       0.049000
54430     54430     hebei          118.1381       40.7486           77       193     2012      02        12        043              0.029250      -6.558990       0.000000       0.125750   -9999.000000   -9999.000000       0.055300       0.147000
54430     54430     hebei          118.1381       40.7486           77       193     2012      02        13        044              0.030000      -5.804871       0.000000       0.122705       0.089000   -9999.000000   -9999.000000       0.074000
54430     54430     hebei          118.1381       40.7486           77       193     2012      02        14        045              0.029957      -3.670349       0.000000       0.141098       0.098000   -9999.000000       0.045300       0.062000
54430     54430     hebei          118.1381       40.7486           77       193     2012      02        15        046              0.029417      -5.732849       0.049400       0.140393   -9999.000000   -9999.000000       0.056400       0.130000
54430     54430     hebei          118.1381       40.7486           77       193     2012      02        16        047              0.029625      -5.255249       0.000000       0.134023   -9999.000000   -9999.000000       0.046800       0.115000
54430     54430     hebei          118.1381       40.7486           77       193     2012      02        17        048              0.029583      -6.287598       0.000000       0.125826   -9999.000000   -9999.000000       0.049800       0.102000
54430     54430     hebei          118.1381       40.7486           77       193     2012      02        18        049              0.029292      -7.449097       0.000000       0.121639   -9999.000000   -9999.000000   -9999.000000       0.016000
54430     54430     hebei          118.1381       40.7486           77       193     2012      02        19        050              0.029458      -6.657379       0.000000       0.126003       0.106000   -9999.000000       0.044300       0.055000
54430     54430     hebei          118.1381       40.7486           77       193     2012      02        20        051              0.030042      -4.838928       0.000000       0.148587       0.104000   -9999.000000       0.051800       0.174000
54430     54430     hebei          118.1381       40.7486           77       193     2012      02        21        052              0.030833      -2.778137       0.000000       0.162600       0.114000   -9999.000000       0.058600       0.236000
54430     54430     hebei          118.1381       40.7486           77       193     2012      02        22        053              0.030417      -1.954865       0.159546       0.174237   -9999.000000   -9999.000000       0.048900   -9999.000000
54430     54430     hebei          118.1381       40.7486           77       193     2012      02        23        054              0.031417      -3.816559       0.000000       0.141997   -9999.000000   -9999.000000       0.056600       0.121000
54430     54430     hebei          118.1381       40.7486           77       193     2012      02        24        055              0.032304      -2.610809       0.000000       0.163406       0.107000   -9999.000000   -9999.000000       0.091000
54430     54430     hebei          118.1381       40.7486           77       193     2012      02        25        056              0.032250      -2.035095       0.000000       0.171195       0.106000   -9999.000000       0.040300       0.038000
54430     54430     hebei          118.1381       40.7486           77       193     2012      02        26        057              0.032042      -3.229645       0.123376       0.160477       0.107000   -9999.000000       0.057000       0.169000
54430     54430     hebei          118.1381       40.7486           77       193     2012      02        27        058              0.032333      -3.733368       0.000000       0.161362       0.095000   -9999.000000   -9999.000000   -9999.000000
54430     54430     hebei          118.1381       40.7486           77       193     2012      02        28        059              0.033750      -2.134155       0.000000       0.172612   -9999.000000   -9999.000000       0.045800       0.153000
54430     54430     hebei          118.1381       40.7486           77       193     2012      02        29        060              0.000000   -9999.000000       0.000000   -9999.000000       0.101000   -9999.000000   -9999.000000   -9999.000000
54430     54430     hebei          118.1381       40.7486           77       193     2012      03        01        061              0.037125      -0.477753       0.000000       0.197741   -9999.000000   -9999.000000       0.050100       0.109000
54430     54430     hebei          118.1381       40.7486           77       193     2012      03        02        062              0.041500      -0.480896       0.000000       0.188885       0.103000   -9999.000000       0.041700       0.242000
54430     54430     hebei          118.1381       40.7486           77       193     2012      03        03        063              0.038917      -0.339233       0.000000       0.199136   -9999.000000       0.381400       0.053900   -9999.000000
54430     54430     hebei          118.1381       40.7486           77       193     2012      03        04        064              0.044250      -0.401215       0.050681       0.191934   -9999.000000   -9999.000000       0.041600       0.147000
54430     54430     hebei          118.1381       40.7486           77       193     2012      03        05        065              0.042250       0.644775       0.650052       0.213291   -9999.000000   -9999.000000       0.056700       0.118000
54430     54430     hebei          118.1381       40.7486           77       193     2012      03        06        066              0.044792       0.241882       0.560851       0.211794       0.115000   -9999.000000       0.061600       0.172000
54430     54430     hebei          118.1381       40.7486           77       193     2012      03        07        067              0.000000      -0.244171       0.000000       0.207377       0.112000   -9999.000000       0.045100       0.161000
54430     54430     hebei          118.1381       40.7486           77       193     2012      03        08        068              0.039833       0.366699       0.000000       0.211782       0.111000       0.174600       0.054200       0.224000
54430     54430     hebei          118.1381       40.7486           77       193     2012      03        09        069              0.039208      -2.142303       0.000000       0.180231   -9999.000000   -9999.000000       0.060100       0.139000
54430     54430     hebei          118.1381       40.7486           77       193     2012      03        10        070              0.038375       0.272430       0.000000       0.203245   -9999.000000   -9999.000000       0.047500       0.080000
54430     54430     hebei          118.1381       40.7486           77       193     2012      03        11        071              0.037417      -2.265930       0.000000       0.179726       0.104000   -9999.000000       0.057300       0.058000
54430     54430     hebei          118.1381       40.7486           77       193     2012      03        12        072              0.040167      -2.045197       0.000000       0.177480       0.107000   -9999.000000   -9999.000000       0.224000
54430     54430     hebei          118.1381       40.7486           77       193     2012      03        13        073              0.048125      -0.436493       0.101196       0.197146       0.105000       0.138700       0.048300       0.141000
54430     54430     hebei          118.1381       40.7486           77       193     2012      03        14        074              0.064583       1.795593       0.122273       0.225662   -9999.000000   -9999.000000       0.058900       0.118000
54430     54430     hebei          118.1381       40.7486           77       193     2012      03        15        075              0.081333       2.419800       0.575354       0.235735   -9999.000000   -9999.000000       0.053600       0.287000
54430     54430     hebei          118.1381       40.7486           77       193     2012      03        16        076              0.103958       3.482880       0.000000       0.265972       0.120000   -9999.000000       0.061500       0.330000
54430     54430     hebei          118.1381       40.7486           77       193     2012      03        17        077              0.105000       4.523376       2.410298       0.273084       0.112000   -9999.000000       0.067200       0.162000
54430     54430     hebei          118.1381       40.7486           77       193     2012      03        18        078              0.101583       3.407013       0.796529       0.247608       0.123000   -9999.000000       0.052100       0.407000
54430     54430     hebei          118.1381       40.7486           77       193     2012      03        19        079              0.100708       0.947632       0.000000       0.227510       0.107000   -9999.000000       0.055200       0.194000
54430     54430     hebei          118.1381       40.7486           77       193     2012      03        20        080              0.101458       1.920929       0.000000       0.231764   -9999.000000   -9999.000000       0.062300       0.195000
54430     54430     hebei          118.1381       40.7486           77       193     2012      03        21        081              0.108458       3.365906       0.000000       0.249332       0.110000   -9999.000000       0.047200       0.391000
54430     54430     hebei          118.1381       40.7486           77       193     2012      03        22        082              0.113917       5.671936       0.070442       0.284242       0.112500   -9999.000000       0.066900   -9999.000000
54430     54430     hebei          118.1381       40.7486           77       193     2012      03        23        083              0.113500       5.941345       0.000000       0.289106       0.100000       0.171000       0.065700       0.555000
54430     54430     hebei          118.1381       40.7486           77       193     2012      03        24        084              0.112375       4.131348       0.000000       0.271417       0.106000   -9999.000000   -9999.000000       0.228000
54430     54430     hebei          118.1381       40.7486           77       193     2012      03        25        085              0.000000       3.820679       0.000000       0.255911   -9999.000000   -9999.000000       0.061600       0.299000
54430     54430     hebei          118.1381       40.7486           77       193     2012      03        26        086              0.113333       4.490814       0.000000       0.255708   -9999.000000       0.120800       0.062200   -9999.000000
54430     54430     hebei          118.1381       40.7486           77       193     2012      03        27        087              0.115208       7.070862       0.000000       0.275477       0.106000   -9999.000000       0.055400   -9999.000000
54430     54430     hebei          118.1381       40.7486           77       193     2012      03        28        088              0.116208       9.295197       0.000000       0.281019       0.113000   -9999.000000       0.063900       0.390000
54430     54430     hebei          118.1381       40.7486           77       193     2012      03        29        089              0.117167      10.576202       0.000000       0.281907       0.111000   -9999.000000   -9999.000000       0.389000
54430     54430     hebei          118.1381       40.7486           77       193     2012      03        30        090              0.115625      10.694427       0.000000       0.278787   -9999.000000   -9999.000000       0.045300       0.329000
54430     54430     hebei          118.1381       40.7486           77       193     2012      03        31        091              0.114792       5.018616       0.000000       0.271554   -9999.000000       0.181600       0.060500       0.361000
54430     54430     hebei          118.1381       40.7486           77       193     2012      04        01        092              0.114917       5.071014       0.000000       0.257035       0.101000   -9999.000000       0.052700   -9999.000000
54430     54430     hebei          118.1381       40.7486           77       193     2012      04        02        093              0.115375       5.674530       0.000000       0.273186       0.101000   -9999.000000       0.059200       0.425000
54430     54430     hebei          118.1381       40.7486           77       193     2012      04        03        094              0.115333       5.770355       0.000000       0.275006       0.110000   -9999.000000       0.063100       0.410000
54430     54430     hebei          118.1381       40.7486           77       193     2012      04        04        095              0.115583       7.697235       0.000000       0.274770       0.086000   -9999.000000       0.055200       0.386000
54430     54430     hebei          118.1381       40.7486           77       193     2012      04        05        096              0.115458       8.282684       0.000000       0.275888   -9999.000000       0.081000       0.055700       0.478000
54430     54430     hebei          118.1381       40.7486           77       193     2012      04        06        097              0.116083       7.691223       0.000000       0.274340       0.097000   -9999.000000       0.064700       0.246000
54430     54430     hebei          118.1381       40.7486           77       193     2012      04        07        098              0.117417       8.943268       0.000000       0.274649       0.101500   -9999.000000       0.055100       0.436000
54430     54430     hebei          118.1381       40.7486           77       193     2012      04        08        099              0.117958      11.954681       0.000000       0.273783       0.098000   -9999.000000       0.061900       0.493000
54430     54430     hebei          118.1381       40.7486           77       193     2012      04        09        100              0.119625      11.962952       0.000000       0.269711       0.092000   -9999.000000       0.064400       0.304000
54430     54430     hebei          118.1381       40.7486           77       193     2012      04        10        101              0.127375      15.137573       6.811869       0.268277   -9999.000000       0.116100       0.065000       0.800000
54430     54430     hebei          118.1381       40.7486           77       193     2012      04        11        102              0.130043      13.465088       0.113141       0.292021       0.096500   -9999.000000       0.069500       0.590000
54430     54430     hebei          118.1381       40.7486           77       193     2012      04        12        103              0.128625      11.135498       0.000000       0.287400       0.096000   -9999.000000   -9999.000000       0.436000
54430     54430     hebei          118.1381       40.7486           77       193     2012      04        13        104              0.128167      13.522095       0.000000       0.280141       0.086000   -9999.000000       0.058400       0.522000
54430     54430     hebei          118.1381       40.7486           77       193     2012      04        14        105              0.127583      15.352600       0.000000       0.275952       0.095500   -9999.000000       0.064100       0.562000
54430     54430     hebei          118.1381       40.7486           77       193     2012      04        15        106              0.124167      17.046661       0.304768       0.270896       0.093000       0.068900       0.065500       0.299000
54430     54430     hebei          118.1381       40.7486           77       193     2012      04        16        107              0.123348      12.422272       0.000000       0.271051       0.099000   -9999.000000       0.052600       0.394000
54430     54430     hebei          118.1381       40.7486           77       193     2012      04        17        108              0.123542      13.405792       0.000000       0.267950       0.097000   -9999.000000   -9999.000000       0.425000
54430     54430     hebei          118.1381       40.7486           77       193     2012      04        18        109              0.123333      16.434143       0.000000       0.265378       0.095000       0.063100   -9999.000000       0.547000
54430     54430     hebei          118.1381       40.7486           77       193     2012      04        19        110              0.121917      16.982117       0.000000       0.264637       0.106000   -9999.000000       0.060800       0.520000
54430     54430     hebei          118.1381       40.7486           77       193     2012      04        20        111              0.121435      15.649536       0.175547       0.265839       0.114000       0.091300   -9999.000000   -9999.000000
54430     54430     hebei          118.1381       40.7486           77       193     2012      04        21        112              0.120625      14.154999       0.000000       0.268914       0.129000   -9999.000000       0.060200       0.475000
54430     54430     hebei          118.1381       40.7486           77       193     2012      04        22        113              0.122083      13.618195       0.000000       0.269888       0.113000   -9999.000000       0.066000       0.485000
54430     54430     hebei          118.1381       40.7486           77       193     2012      04        23        114              0.121500      17.756012       0.000000       0.264876       0.114000       0.154800       0.072400       0.495000
54430     54430     hebei          118.1381       40.7486           77       193     2012      04        24        115              0.155958      18.750610      39.292381       0.264183   -9999.000000   -9999.000000       0.077900       1.000000
54430     54430     hebei          118.1381       40.7486           77       193     2012      04        25        116              0.000000      13.477600       0.000000       0.349316       0.134000       0.110300       0.085100   -9999.000000
54430     54430     hebei          118.1381       40.7486           77       193     2012      04        26        117              0.141583      12.023651       0.241667       0.322479       0.144000   -9999.000000       0.076500       0.821000
54430     54430     hebei          118.1381       40.7486           77       193     2012      04        27        118              0.136833      14.637939       0.000000       0.309776       0.117500   -9999.000000   -9999.000000       0.580000
54430     54430     hebei          118.1381       40.7486           77       193     2012      04        28        119              0.133667      13.121887       0.000000       0.300702       0.113500       0.219700       0.072300       0.651000
54430     54430     hebei          118.1381       40.7486           77       193     2012      04        29        120              0.132042      13.409515       0.000000       0.295847       0.098000   -9999.000000       0.058800       0.600000
54430     54430     hebei          118.1381       40.7486           77       193     2012      04        30        121              0.131417      15.860046       0.000000       0.291282       0.109500   -9999.000000       0.079600   -9999.000000
54430     54430     hebei          118.1381       40.7486           77       193     2012      05        01        122              0.131083      17.877502       0.000000       0.288724       0.156000   -9999.000000       0.079700       0.622000
54430     54430     hebei          118.1381       40.7486           77       193     2012      05        02        123              0.130125      19.338959       0.000000       0.283870       0.139000   -9999.000000       0.081600       0.646000
54430     54430     hebei          118.1381       40.7486           77       193     2012      05        03        124              0.129458      19.602509       0.000000       0.278735       0.130000       0.163800       0.070600       0.619000
54430     54430     hebei          118.1381       40.7486           77       193     2012      05        04        125              0.128292      20.757629       0.000000       0.273645       0.130000   -9999.000000       0.079000       0.616000
54430     54430     hebei          118.1381       40.7486           77       193     2012      05        05        126              0.126208      20.479858       0.000000       0.269684       0.126000   -9999.000000       0.067000       0.409000
54430     54430     hebei          118.1381       40.7486           77       193     2012      05        06        127              0.125625      19.824860       0.000000       0.263970       0.133000       0.151600       0.069100       0.608000
54430     54430     hebei          118.1381       40.7486           77       193     2012      05        07        128              0.122625      20.746124       0.000000       0.260312   -9999.000000   -9999.000000       0.096800       0.578000
54430     54430     hebei          118.1381       40.7486           77       193     2012      05        08        129              0.123000      18.864044       0.000000       0.258753       0.124500       0.039700       0.085500       0.469000
54430     54430     hebei          118.1381       40.7486           77       193     2012      05        09        130              0.121917      20.021942       0.000000       0.254376       0.123000   -9999.000000       0.095500       0.507000
54430     54430     hebei          118.1381       40.7486           77       193     2012      05        10        131              0.123417      20.306885       1.050190       0.251039       0.123000   -9999.000000       0.098700       0.476000
54430     54430     hebei          118.1381       40.7486           77       193     2012      05        11        132              0.121750      22.468750       2.282874       0.250203       0.246000   -9999.000000       0.107500       0.706000
54430     54430     hebei          118.1381       40.7486           77       193     2012      05        12        133              0.133500      16.848389       3.009203       0.271692       0.238000   -9999.000000       0.107600       0.665000
54430     54430     hebei          118.1381       40.7486           77       193     2012      05        13        134              0.136583      16.633667       5.586182       0.285352       0.230500       0.096800       0.101100       0.963000
54430     54430     hebei          118.1381       40.7486           77       193     2012      05        14        135              0.135833      17.020721       0.069767       0.290754       0.187000   -9999.000000       0.084100       0.540000
54430     54430     hebei          118.1381       40.7486           77       193     2012      05        15        136              0.130792      15.983704       0.000000       0.281342       0.195000   -9999.000000       0.093600       0.552000
54430     54430     hebei          118.1381       40.7486           77       193     2012      05        16        137              0.128208      15.869659       0.131385       0.273733       0.184500   -9999.000000       0.081200       0.487000
54430     54430     hebei          118.1381       40.7486           77       193     2012      05        17        138              0.128750      16.777985       0.000000       0.270024       0.194000   -9999.000000       0.083900       0.483000
54430     54430     hebei          118.1381       40.7486           77       193     2012      05        18        139              0.128667      20.101196       0.000000       0.264010       0.184000   -9999.000000       0.085200       0.588000
54430     54430     hebei          118.1381       40.7486           77       193     2012      05        19        140              0.131292      21.947296       7.340839       0.257173       0.196000   -9999.000000       0.102200   -9999.000000
54430     54430     hebei          118.1381       40.7486           77       193     2012      05        20        141              0.132458      22.089630       1.241598       0.282412   -9999.000000   -9999.000000       0.087900       0.797000
54430     54430     hebei          118.1381       40.7486           77       193     2012      05        21        142              0.131583      20.006866       0.000000       0.280600       0.234500       0.092800       0.134100       0.640000
54430     54430     hebei          118.1381       40.7486           77       193     2012      05        22        143              0.128833      21.640167       1.692934       0.270450       0.253000   -9999.000000       0.128400       0.561000
54430     54430     hebei          118.1381       40.7486           77       193     2012      05        23        144              0.126583      19.687469       0.000000       0.273336   -9999.000000   -9999.000000       0.121800       0.614000
54430     54430     hebei          118.1381       40.7486           77       193     2012      05        24        145              0.123000      19.673889       0.000000       0.264519       0.217000   -9999.000000       0.123800   -9999.000000
54430     54430     hebei          118.1381       40.7486           77       193     2012      05        25        146              0.000000      18.739746       0.000000       0.258361       0.220000   -9999.000000       0.108500       0.551000
54430     54430     hebei          118.1381       40.7486           77       193     2012      05        26        147              0.121417      19.501465       0.000000       0.252680       0.222000       0.266100       0.120900       0.494000
54430     54430     hebei          118.1381       40.7486           77       193     2012      05        27        148              0.120167      21.735535       0.000000       0.246187       0.230000   -9999.000000       0.129600       0.512000
54430     54430     hebei          118.1381       40.7486           77       193     2012      05        28        149              0.118917      22.880493       0.000000       0.239571       0.218000   -9999.000000       0.115900       0.593000
54430     54430     hebei          118.1381       40.7486           77       193     2012      05        29        150              0.121542      24.042999      10.311716       0.231905       0.252000   -9999.000000       0.122500   -9999.000000
54430     54430     hebei          118.1381       40.7486           77       193     2012      05        30        151              0.126750      20.045685       0.337882       0.274669       0.227000   -9999.000000   -9999.000000   -9999.000000
54430     54430     hebei          118.1381       40.7486           77       193     2012      05        31        152              0.123917      19.344208       0.058008       0.274587       0.219000       0.080100   -9999.000000   -9999.000000
54430     54430     hebei          118.1381       40.7486           77       193     2012      06        01        153              0.120250      20.122986       0.000000       0.262015       0.228000   -9999.000000       0.130600       0.528000
54430     54430     hebei          118.1381       40.7486           77       193     2012      06        02        154              0.119958      17.503357       0.940871       0.261847       0.250000   -9999.000000       0.113100       0.514000
54430     54430     hebei          118.1381       40.7486           77       193     2012      06        03        155              0.139750      20.467316      19.547016       0.259918       0.301000       0.224400       0.149200       0.977000
54430     54430     hebei          118.1381       40.7486           77       193     2012      06        04        156              0.147292      17.802307       1.682988       0.327641       0.285000   -9999.000000       0.187800       0.840000
54430     54430     hebei          118.1381       40.7486           77       193     2012      06        05        157              0.143333      21.228210       0.114343       0.303400       0.241000   -9999.000000       0.186000       0.637000
54430     54430     hebei          118.1381       40.7486           77       193     2012      06        06        158              0.146042      21.704437      15.252488       0.290241       0.245000       0.134600       0.174400       0.763000
54430     54430     hebei          118.1381       40.7486           77       193     2012      06        07        159              0.150875      21.639648       9.691009       0.319589       0.321000       0.070500       0.193500       0.941000
54430     54430     hebei          118.1381       40.7486           77       193     2012      06        08        160              0.148250      23.325287       1.503170       0.323436       0.229500       0.102300       0.162300       0.932000
54430     54430     hebei          118.1381       40.7486           77       193     2012      06        09        161              0.158042      23.524841       9.743925       0.312693       0.277500   -9999.000000       0.083900       1.000000
54430     54430     hebei          118.1381       40.7486           77       193     2012      06        10        162              0.154739      22.476471       0.000000       0.322842       0.213000   -9999.000000       0.171000       0.656000
54430     54430     hebei          118.1381       40.7486           77       193     2012      06        11        163              0.000000      20.370758       0.041760       0.307608       0.252000       0.105700       0.160300       0.646000
54430     54430     hebei          118.1381       40.7486           77       193     2012      06        12        164              0.138826      20.803345       0.000000       0.298158       0.262000   -9999.000000       0.188200       0.528000
54430     54430     hebei          118.1381       40.7486           77       193     2012      06        13        165              0.142250      20.204987      11.083886       0.291517       0.317000       0.087900       0.223600       0.866000
54430     54430     hebei          118.1381       40.7486           77       193     2012      06        14        166              0.166619      18.615814      10.791517       0.314998       0.317000   -9999.000000       0.200500       0.821000
54430     54430     hebei          118.1381       40.7486           77       193     2012      06        15        167              0.155917      17.944244       0.000000       0.333257       0.286000   -9999.000000       0.191700       0.705000
54430     54430     hebei          118.1381       40.7486           77       193     2012      06        16        168              0.148833      19.592468       0.666595       0.313075       0.267000       0.157300   -9999.000000       0.672000
54430     54430     hebei          118.1381       40.7486           77       193     2012      06        17        169              0.142417      22.423126       1.552868       0.304411       0.264000   -9999.000000       0.173200   -9999.000000
54430     54430     hebei          118.1381       40.7486           77       193     2012      06        18        170              0.137542      23.919342       0.251036       0.299132       0.277000   -9999.000000       0.188300       0.833000
54430     54430     hebei          118.1381       40.7486           77       193     2012      06        19        171              0.131708      24.628540       0.000000       0.295608       0.258500   -9999.000000       0.163600   -9999.000000
54430     54430     hebei          118.1381       40.7486           77       193     2012      06        20        172              0.126417      25.121399       0.655831       0.287763   -9999.000000   -9999.000000       0.167900       0.727000
54430     54430     hebei          118.1381       40.7486           77       193     2012      06        21        173              0.120958      24.178619       0.249541       0.285870       0.277000   -9999.000000       0.168300       0.592000
54430     54430     hebei          118.1381       40.7486           77       193     2012      06        22        174              0.118000      25.246460       0.184447       0.280272       0.247500   -9999.000000       0.168900   -9999.000000
54430     54430     hebei          118.1381       40.7486           77       193     2012      06        23        175              0.116250      23.714233       0.000000       0.279058       0.280000   -9999.000000       0.166400       0.778000
54430     54430     hebei          118.1381       40.7486           77       193     2012      06        24        176              0.133750      24.280457      23.505886       0.274361       0.310000   -9999.000000       0.175400       1.000000
54430     54430     hebei          118.1381       40.7486           77       193     2012      06        25        177              0.172500      23.457489      12.985645       0.317515       0.308000   -9999.000000       0.190600       1.000000
54430     54430     hebei          118.1381       40.7486           77       193     2012      06        26        178              0.159208      22.177917       1.801490       0.343242       0.280000       0.240300       0.193300       0.809000
54430     54430     hebei          118.1381       40.7486           77       193     2012      06        27        179              0.146478      24.209930       0.000000       0.316017       0.247000   -9999.000000       0.186300   -9999.000000
54430     54430     hebei          118.1381       40.7486           77       193     2012      06        28        180              0.140917      24.175476       6.229809       0.305392       0.416000   -9999.000000       0.175200       0.837000
54430     54430     hebei          118.1381       40.7486           77       193     2012      06        29        181              0.160958      22.217865       1.716128       0.309514       0.279500       0.121300       0.205800   -9999.000000
54430     54430     hebei          118.1381       40.7486           77       193     2012      06        30        182              0.145875      22.295929       0.301152       0.317695       0.256000   -9999.000000   -9999.000000   -9999.000000
54430     54430     hebei          118.1381       40.7486           77       193     2012      07        01        183              0.129583      24.804352       0.758188       0.302279       0.273000       0.047100       0.173700       0.862000
54430     54430     hebei          118.1381       40.7486           77       193     2012      07        02        184              0.105958      25.491608       0.000000       0.293614       0.300500   -9999.000000       0.191900       0.707000
54430     54430     hebei          118.1381       40.7486           77       193     2012      07        03        185              0.085125      24.903046       0.000000       0.285722       0.314000   -9999.000000       0.201800       0.724000
54430     54430     hebei          118.1381       40.7486           77       193     2012      07        04        186              0.072583      25.391144       0.000000       0.279907       0.335000       0.061400       0.173900       0.596000
54430     54430     hebei          118.1381       40.7486           77       193     2012      07        05        187              0.069000      25.368042       2.086998       0.274301   -9999.000000   -9999.000000       0.209300       0.630000
54430     54430     hebei          118.1381       40.7486           77       193     2012      07        06        188              0.069042      23.732666       0.637775       0.282594   -9999.000000   -9999.000000       0.188500       0.570000
54430     54430     hebei          118.1381       40.7486           77       193     2012      07        07        189              0.068500      25.396912       0.649194       0.275586   -9999.000000   -9999.000000       0.197400       0.718000
54430     54430     hebei          118.1381       40.7486           77       193     2012      07        08        190              0.065000      25.359161       1.140946       0.277013   -9999.000000   -9999.000000       0.200500       0.582000
54430     54430     hebei          118.1381       40.7486           77       193     2012      07        09        191              0.073667      26.378998       4.297806       0.272176       0.389000       0.160500       0.170300       0.664000
54430     54430     hebei          118.1381       40.7486           77       193     2012      07        10        192              0.136125      25.761780      13.715703       0.285659       0.377000   -9999.000000       0.186800       0.964000
54430     54430     hebei          118.1381       40.7486           77       193     2012      07        11        193              0.133792      24.636292       1.915270       0.318280       0.463500   -9999.000000       0.193400       0.866000
54430     54430     hebei          118.1381       40.7486           77       193     2012      07        12        194              0.123583      24.205780       2.730339       0.307299       0.436000       0.065300       0.174200       0.769000
54430     54430     hebei          118.1381       40.7486           77       193     2012      07        13        195              0.109333      24.575989       0.000000       0.303725       0.401000   -9999.000000       0.175800       0.594000
54430     54430     hebei          118.1381       40.7486           77       193     2012      07        14        196              0.089500      23.731842       0.000000       0.293415       0.484000       0.117600       0.173400       0.747000
54430     54430     hebei          118.1381       40.7486           77       193     2012      07        15        197              0.074083      23.954620       0.000000       0.284760   -9999.000000   -9999.000000       0.156100       0.616000
54430     54430     hebei          118.1381       40.7486           77       193     2012      07        16        198              0.065917      25.106598       0.000000       0.277214       0.421000   -9999.000000       0.158100   -9999.000000
54430     54430     hebei          118.1381       40.7486           77       193     2012      07        17        199              0.061458      26.540436       0.000000       0.271294       0.420000       0.138800       0.137600       0.662000
54430     54430     hebei          118.1381       40.7486           77       193     2012      07        18        200              0.057958      26.633636       0.000000       0.264674       0.427000   -9999.000000       0.144800       0.613000
54430     54430     hebei          118.1381       40.7486           77       193     2012      07        19        201              0.055417      26.514465       0.000000       0.258211       0.412000       0.086300       0.152300       0.616000
54430     54430     hebei          118.1381       40.7486           77       193     2012      07        20        202              0.053696      26.985229       0.119210       0.252441       0.426000   -9999.000000       0.157200       0.704000
54430     54430     hebei          118.1381       40.7486           77       193     2012      07        21        203              0.172708      27.319153     111.366951       0.247501   -9999.000000   -9999.000000       0.161700   -9999.000000
54430     54430     hebei          118.1381       40.7486           77       193     2012      07        22        204              0.199625      25.218933       0.352782       0.352031       0.500000   -9999.000000       0.164400       1.000000
54430     54430     hebei          118.1381       40.7486           77       193     2012      07        23        205              0.180292      24.864349       0.046465       0.348206       0.500000   -9999.000000       0.193200       0.798000
54430     54430     hebei          118.1381       40.7486           77       193     2012      07        24        206              0.171708      26.026703       0.499906       0.327466       0.476500       0.210700       0.194100       0.868000
54430     54430     hebei          118.1381       40.7486           77       193     2012      07        25        207              0.182174      24.438751       4.762430       0.319765   -9999.000000   -9999.000000       0.206100       1.000000
54430     54430     hebei          118.1381       40.7486           77       193     2012      07        26        208              0.187083      24.564423       0.425667       0.322311       0.500000   -9999.000000       0.185500   -9999.000000
54430     54430     hebei          118.1381       40.7486           77       193     2012      07        27        209              0.178750      25.532623       5.884330       0.317097       0.500000   -9999.000000       0.195400       0.835000
54430     54430     hebei          118.1381       40.7486           77       193     2012      07        28        210              0.186875      26.599396       5.416189       0.316669       0.490000   -9999.000000       0.206600       0.927000
54430     54430     hebei          118.1381       40.7486           77       193     2012      07        29        211              0.169958      26.314423       0.000000       0.328098       0.500000   -9999.000000       0.188400       0.899000
54430     54430     hebei          118.1381       40.7486           77       193     2012      07        30        212              0.166833      25.622528      13.845649       0.310115   -9999.000000   -9999.000000       0.108700       1.000000
54430     54430     hebei          118.1381       40.7486           77       193     2012      07        31        213              0.204583      25.422943      14.253424       0.317961   -9999.000000   -9999.000000   -9999.000000       1.000000
54430     54430     hebei          118.1381       40.7486           77       193     2012      08        01        214              0.219042      22.290924      56.179138       0.348583       0.500000   -9999.000000       0.106300       1.000000
54430     54430     hebei          118.1381       40.7486           77       193     2012      08        02        215              0.198917      21.380524       0.215034       0.376375       0.476000   -9999.000000       0.115500       0.797000
54430     54430     hebei          118.1381       40.7486           77       193     2012      08        03        216              0.188292      23.705170       0.214104       0.338394       0.474000   -9999.000000       0.103400       0.844000
54430     54430     hebei          118.1381       40.7486           77       193     2012      08        04        217              0.177292      24.228455       0.000000       0.325950       0.462500   -9999.000000       0.108600       0.799000
54430     54430     hebei          118.1381       40.7486           77       193     2012      08        05        218              0.167667      24.245575       0.584082       0.319033       0.496000   -9999.000000       0.111800       0.797000
54430     54430     hebei          118.1381       40.7486           77       193     2012      08        06        219              0.156042      25.516724       0.000000       0.313796       0.475500   -9999.000000       0.200000       0.783000
54430     54430     hebei          118.1381       40.7486           77       193     2012      08        07        220              0.146542      26.256042       0.000000       0.308845       0.477000   -9999.000000   -9999.000000       0.694000
54430     54430     hebei          118.1381       40.7486           77       193     2012      08        08        221              0.140625      26.965546       0.266257       0.305672       0.488000   -9999.000000       0.197800       0.741000
54430     54430     hebei          118.1381       40.7486           77       193     2012      08        09        222              0.129542      25.585571       0.000000       0.304683       0.434500   -9999.000000       0.175300       0.679000
54430     54430     hebei          118.1381       40.7486           77       193     2012      08        10        223              0.118292      26.303192       0.000000       0.300210       0.499000   -9999.000000       0.180100       0.706000
54430     54430     hebei          118.1381       40.7486           77       193     2012      08        11        224              0.114083      26.569092       1.163633       0.296626       0.487000   -9999.000000       0.185900       0.597000
54430     54430     hebei          118.1381       40.7486           77       193     2012      08        12        225              0.113792      25.092346       0.332701       0.297853       0.424000   -9999.000000       0.168700       0.725000
54430     54430     hebei          118.1381       40.7486           77       193     2012      08        13        226              0.108083      24.022766       0.000000       0.296142       0.382000   -9999.000000       0.207400       0.612000
54430     54430     hebei          118.1381       40.7486           77       193     2012      08        14        227              0.105375      23.631317       0.315209       0.291834       0.452000       0.136900       0.228300   -9999.000000
54430     54430     hebei          118.1381       40.7486           77       193     2012      08        15        228              0.101208      22.382324       0.000000       0.291630       0.468000   -9999.000000       0.200900       0.636000
54430     54430     hebei          118.1381       40.7486           77       193     2012      08        16        229              0.095958      23.751556       0.000000       0.289037       0.461000   -9999.000000       0.213800       0.518000
54430     54430     hebei          118.1381       40.7486           77       193     2012      08        17        230              0.094958      24.455719       0.080887       0.285472       0.440500   -9999.000000   -9999.000000       0.642000
54430     54430     hebei          118.1381       40.7486           77       193     2012      08        18        231              0.089375      24.613281       0.182329       0.284434       0.436000   -9999.000000       0.192500       0.643000
54430     54430     hebei          118.1381       40.7486           77       193     2012      08        19        232              0.082000      24.719391       0.000000       0.283912       0.429000   -9999.000000       0.223700   -9999.000000
54430     54430     hebei          118.1381       40.7486           77       193     2012      08        20        233              0.078435      24.796417       3.292593       0.280602       0.434500   -9999.000000       0.212400       0.650000
54430     54430     hebei          118.1381       40.7486           77       193     2012      08        21        234              0.082583      23.704529       0.467211       0.290753   -9999.000000   -9999.000000       0.232800       0.616000
54430     54430     hebei          118.1381       40.7486           77       193     2012      08        22        235              0.082292      21.656464       0.000000       0.286444       0.485000   -9999.000000       0.242400   -9999.000000
54430     54430     hebei          118.1381       40.7486           77       193     2012      08        23        236              0.079958      20.794250       0.000000       0.283587       0.500000   -9999.000000       0.229500       0.604000
54430     54430     hebei          118.1381       40.7486           77       193     2012      08        24        237              0.077667      22.078003       0.000000       0.281511       0.486000   -9999.000000       0.236200   -9999.000000
54430     54430     hebei          118.1381       40.7486           77       193     2012      08        25        238              0.000000      22.408783       0.000000       0.279198       0.500000   -9999.000000       0.254200   -9999.000000
54430     54430     hebei          118.1381       40.7486           77       193     2012      08        26        239              0.074417      22.632843       0.000000       0.277238   -9999.000000   -9999.000000       0.227400       0.595000
54430     54430     hebei          118.1381       40.7486           77       193     2012      08        27        240              0.074167      23.156403       1.636540       0.276556       0.500000   -9999.000000       0.189300       0.658000
54430     54430     hebei          118.1381       40.7486           77       193     2012      08        28        241              0.075250      23.150665       1.189144       0.278542       0.496500   -9999.000000       0.174800       0.668000
54430     54430     hebei          118.1381       40.7486           77       193     2012      08        29        242              0.076958      24.379791       0.131810       0.281060       0.500000       0.182800       0.158300       0.535000
54430     54430     hebei          118.1381       40.7486           77       193     2012      08        30        243              0.076333      24.797607       0.000000       0.277480       0.500000   -9999.000000       0.193800       0.653000
54430     54430     hebei          118.1381       40.7486           77       193     2012      08        31        244              0.075458      25.244690       0.108528       0.274386       0.491500   -9999.000000       0.189200       0.638000
54430     54430     hebei          118.1381       40.7486           77       193     2012      09        01        245              0.074792      24.577209       1.814869       0.272997       0.483000   -9999.000000       0.170100       0.579000
54430     54430     hebei          118.1381       40.7486           77       193     2012      09        02        246              0.155958      25.280060      32.730869       0.275889       0.484000   -9999.000000       0.202700       0.841000
54430     54430     hebei          118.1381       40.7486           77       193     2012      09        03        247              0.158625      20.773621       0.000000       0.347637       0.463500       0.176200       0.189000       0.746000
54430     54430     hebei          118.1381       40.7486           77       193     2012      09        04        248              0.150417      19.731293       0.000000       0.320560       0.357000       0.316700       0.168200       0.587000
54430     54430     hebei          118.1381       40.7486           77       193     2012      09        05        249              0.144708      18.955444       0.000000       0.310876       0.384500   -9999.000000       0.187100       0.569000
54430     54430     hebei          118.1381       40.7486           77       193     2012      09        06        250              0.141583      19.672119       0.421556       0.305217       0.459000       0.106500       0.168400       0.635000
54430     54430     hebei          118.1381       40.7486           77       193     2012      09        07        251              0.162792      20.724548       7.423742       0.301761       0.480000   -9999.000000       0.186100       0.774000
54430     54430     hebei          118.1381       40.7486           77       193     2012      09        08        252              0.161375      19.514862       0.000000       0.320178       0.421000   -9999.000000       0.185700       0.708000
54430     54430     hebei          118.1381       40.7486           77       193     2012      09        09        253              0.156500      20.310394       0.000000       0.308988       0.428000   -9999.000000       0.172800       0.678000
54430     54430     hebei          118.1381       40.7486           77       193     2012      09        10        254              0.151792      21.902588       0.079635       0.302910       0.429000   -9999.000000       0.169900       0.624000
54430     54430     hebei          118.1381       40.7486           77       193     2012      09        11        255              0.158083      22.273560      11.808888       0.298946       0.425000       0.085200       0.189500       0.740000
54430     54430     hebei          118.1381       40.7486           77       193     2012      09        12        256              0.165292      20.788300       0.000000       0.317583       0.384000   -9999.000000       0.175600   -9999.000000
54430     54430     hebei          118.1381       40.7486           77       193     2012      09        13        257              0.154833      18.151001       0.000000       0.316071       0.382500   -9999.000000       0.181500       0.698000
54430     54430     hebei          118.1381       40.7486           77       193     2012      09        14        258              0.149083      17.184235       0.238130       0.307103       0.402000       0.106300       0.179000       0.585000
54430     54430     hebei          118.1381       40.7486           77       193     2012      09        15        259              0.146375      17.017853       0.254611       0.303891   -9999.000000       0.174800       0.163100       0.599000
54430     54430     hebei          118.1381       40.7486           77       193     2012      09        16        260              0.142125      17.872742       0.051903       0.301012       0.375500       0.204000       0.183200       0.569000
54430     54430     hebei          118.1381       40.7486           77       193     2012      09        17        261              0.138792      18.135803       0.000000       0.298564       0.436000   -9999.000000       0.148000   -9999.000000
54430     54430     hebei          118.1381       40.7486           77       193     2012      09        18        262              0.135167      17.788849       0.000000       0.295708       0.358500   -9999.000000       0.158000       0.621000
54430     54430     hebei          118.1381       40.7486           77       193     2012      09        19        263              0.132083      17.902649       0.000000       0.293573       0.374000       0.127100       0.166000       0.530000
54430     54430     hebei          118.1381       40.7486           77       193     2012      09        20        264              0.129792      18.227448       1.240757       0.291708       0.327000   -9999.000000       0.170100       0.540000
54430     54430     hebei          118.1381       40.7486           77       193     2012      09        21        265              0.130667      18.675934       0.232941       0.294493   -9999.000000       0.115000       0.150200       0.587000
54430     54430     hebei          118.1381       40.7486           77       193     2012      09        22        266              0.128875      18.661316       0.068234       0.292701       0.259000       0.095900       0.177000   -9999.000000
54430     54430     hebei          118.1381       40.7486           77       193     2012      09        23        267              0.127542      19.059570       9.651298       0.290814       0.259000       0.127900       0.148000       0.554000
54430     54430     hebei          118.1381       40.7486           77       193     2012      09        24        268              0.125833      18.929718       0.000000       0.318951       0.252500       0.055400       0.157500       0.701000
54430     54430     hebei          118.1381       40.7486           77       193     2012      09        25        269              0.124000      18.967377       2.389409       0.306072   -9999.000000   -9999.000000       0.172300       0.617000
54430     54430     hebei          118.1381       40.7486           77       193     2012      09        26        270              0.122333      17.681671       0.000000       0.307219       0.251000   -9999.000000       0.141800       0.614000
54430     54430     hebei          118.1381       40.7486           77       193     2012      09        27        271              0.142214      17.458160      12.399525       0.302798       0.269000   -9999.000000       0.170900       0.495000
54430     54430     hebei          118.1381       40.7486           77       193     2012      09        28        272              0.150533      14.251465       0.000000       0.329083       0.289000   -9999.000000       0.173300       0.718000
54430     54430     hebei          118.1381       40.7486           77       193     2012      09        29        273              0.145750      13.763519       0.000000       0.314140       0.257500   -9999.000000       0.153000       0.561000
54430     54430     hebei          118.1381       40.7486           77       193     2012      09        30        274              0.140417      14.174774       0.000000       0.308247       0.254000   -9999.000000       0.169600       0.581000
54430     54430     hebei          118.1381       40.7486           77       193     2012      10        01        275              0.136833      14.135223       0.000000       0.305075       0.169000   -9999.000000       0.148700       0.532000
54430     54430     hebei          118.1381       40.7486           77       193     2012      10        02        276              0.134750      15.070129       0.000000       0.302591       0.207000       0.165100       0.128400       0.469000
54430     54430     hebei          118.1381       40.7486           77       193     2012      10        03        277              0.131875      15.935760       0.000000       0.300489       0.228000       0.227700       0.151200       0.456000
54430     54430     hebei          118.1381       40.7486           77       193     2012      10        04        278              0.129167      14.630249       0.000000       0.298701       0.228000       0.114100       0.132600       0.553000
54430     54430     hebei          118.1381       40.7486           77       193     2012      10        05        279              0.126167      14.889587       0.000000       0.297113       0.224000   -9999.000000       0.139600       0.603000
54430     54430     hebei          118.1381       40.7486           77       193     2012      10        06        280              0.123125      14.853210       0.000000       0.296231       0.221000       0.033400       0.151100       0.380000
54430     54430     hebei          118.1381       40.7486           77       193     2012      10        07        281              0.121000      14.813080       0.000000       0.295190       0.222000       0.197000       0.154000       0.515000
54430     54430     hebei          118.1381       40.7486           77       193     2012      10        08        282              0.120583      15.056427      12.071281       0.294558       0.226000   -9999.000000       0.110700       0.442000
54430     54430     hebei          118.1381       40.7486           77       193     2012      10        09        283              0.142208      15.697205       3.016706       0.306270       0.256000       0.247800       0.131000       0.873000
54430     54430     hebei          118.1381       40.7486           77       193     2012      10        10        284              0.137667      13.295227       0.000000       0.326996       0.247000   -9999.000000       0.116100       0.514000
54430     54430     hebei          118.1381       40.7486           77       193     2012      10        11        285              0.134625      12.113556       0.000000       0.312120       0.178000       0.145000       0.123500   -9999.000000
54430     54430     hebei          118.1381       40.7486           77       193     2012      10        12        286              0.132917      12.562836       0.000000       0.307760       0.172000       0.162500       0.126500       0.592000
54430     54430     hebei          118.1381       40.7486           77       193     2012      10        13        287              0.128833      13.475494       0.000000       0.305314       0.163000   -9999.000000       0.103500       0.431000
54430     54430     hebei          118.1381       40.7486           77       193     2012      10        14        288              0.125167      10.900055       0.000000       0.302107       0.193000   -9999.000000       0.119900       0.514000
54430     54430     hebei          118.1381       40.7486           77       193     2012      10        15        289              0.125500      10.657928       0.000000       0.300951       0.160000       0.132700       0.101500       0.541000
54430     54430     hebei          118.1381       40.7486           77       193     2012      10        16        290              0.160000      11.673065      10.126307       0.300727       0.192000   -9999.000000       0.106000   -9999.000000
54430     54430     hebei          118.1381       40.7486           77       193     2012      10        17        291              0.154167       9.194550       0.000000       0.327077       0.188000       0.123800       0.113900       0.789000
54430     54430     hebei          118.1381       40.7486           77       193     2012      10        18        292              0.148833       8.872955       0.000000       0.311418       0.192000   -9999.000000   -9999.000000       0.622000
54430     54430     hebei          118.1381       40.7486           77       193     2012      10        19        293              0.145375       9.093323       0.000000       0.307528       0.186000   -9999.000000       0.088300       0.661000
54430     54430     hebei          118.1381       40.7486           77       193     2012      10        20        294              0.142750       9.672333       0.000000       0.305492       0.189000   -9999.000000       0.106900       0.532000
54430     54430     hebei          118.1381       40.7486           77       193     2012      10        21        295              0.157667      10.187195      25.269434       0.304046   -9999.000000   -9999.000000       0.105400   -9999.000000
54430     54430     hebei          118.1381       40.7486           77       193     2012      10        22        296              0.159208       8.540771       0.000000       0.342262   -9999.000000       0.168500       0.092900       0.789000
54430     54430     hebei          118.1381       40.7486           77       193     2012      10        23        297              0.152750       8.524780       0.000000       0.329568   -9999.000000   -9999.000000       0.097200       0.706000
54430     54430     hebei          118.1381       40.7486           77       193     2012      10        24        298              0.149500       9.206848       0.000000       0.320399   -9999.000000   -9999.000000       0.081700       0.727000
54430     54430     hebei          118.1381       40.7486           77       193     2012      10        25        299              0.000000       9.739563       0.000000       0.315709       0.151000       0.018900       0.079400       0.784000
54430     54430     hebei          118.1381       40.7486           77       193     2012      10        26        300              0.145625      10.345184      30.046278       0.312505       0.146000   -9999.000000       0.089700       0.639000
54430     54430     hebei          118.1381       40.7486           77       193     2012      10        27        301              0.145958      10.994324       0.000000       0.336796       0.148500       0.101500       0.081100       0.649000
54430     54430     hebei          118.1381       40.7486           77       193     2012      10        28        302              0.000000      10.471405       0.000000       0.337381       0.124000   -9999.000000       0.094100       0.581000
54430     54430     hebei          118.1381       40.7486           77       193     2012      10        29        303              0.139917       8.721069       0.187253       0.324379       0.137000   -9999.000000       0.082600       0.543000
54430     54430     hebei          118.1381       40.7486           77       193     2012      10        30        304              0.137125       6.504364       0.731581       0.319649   -9999.000000   -9999.000000       0.062200       0.523000
54430     54430     hebei          118.1381       40.7486           77       193     2012      10        31        305              0.134958       5.886597       0.000000       0.315104   -9999.000000   -9999.000000       0.078800       0.417000
54430     54430     hebei          118.1381       40.7486           77       193     2012      11        01        306              0.133667       4.910065       0.000000       0.311249       0.131000   -9999.000000   -9999.000000       0.509000
54430     54430     hebei          118.1381       40.7486           77       193     2012      11        02        307              0.133417       5.692688       0.000000       0.310472       0.135000   -9999.000000       0.074300       0.587000
54430     54430     hebei          118.1381       40.7486           77       193     2012      11        03        308              0.149958       6.954468      15.978584       0.309492       0.135000   -9999.000000       0.083000       0.943000
54430     54430     hebei          118.1381       40.7486           77       193     2012      11        04        309              0.164833       8.111847       6.203285       0.332464   -9999.000000       0.132700   -9999.000000       0.817000
54430     54430     hebei          118.1381       40.7486           77       193     2012      11        05        310              0.156542       4.998108       0.000000       0.338611   -9999.000000   -9999.000000       0.058600       0.806000
54430     54430     hebei          118.1381       40.7486           77       193     2012      11        06        311              0.150375       4.815979       0.000000       0.324039       0.153000   -9999.000000       0.071500       0.617000
54430     54430     hebei          118.1381       40.7486           77       193     2012      11        07        312              0.148500       4.695068       0.000000       0.318434       0.154000       0.236400       0.072200       0.647000
54430     54430     hebei          118.1381       40.7486           77       193     2012      11        08        313              0.145583       4.740906       0.000000       0.315297       0.151000       0.171200   -9999.000000       0.589000
54430     54430     hebei          118.1381       40.7486           77       193     2012      11        09        314              0.143583       4.434509       0.000000       0.311921       0.142000       0.041800       0.077000   -9999.000000
54430     54430     hebei          118.1381       40.7486           77       193     2012      11        10        315              0.156125       4.423035      14.762536       0.311662   -9999.000000   -9999.000000       0.052500       0.449000
54430     54430     hebei          118.1381       40.7486           77       193     2012      11        11        316              0.157792       3.134338       2.050575       0.321815   -9999.000000   -9999.000000       0.052600       0.565000
54430     54430     hebei          118.1381       40.7486           77       193     2012      11        12        317              0.153333       2.970978       4.851633       0.324415   -9999.000000   -9999.000000       0.046900       0.520000
54430     54430     hebei          118.1381       40.7486           77       193     2012      11        13        318              0.000000       1.977844       0.000000       0.327112   -9999.000000   -9999.000000       0.042400       0.431000
54430     54430     hebei          118.1381       40.7486           77       193     2012      11        14        319              0.145750       1.088959       0.000000       0.303372   -9999.000000   -9999.000000       0.052300   -9999.000000
54430     54430     hebei          118.1381       40.7486           77       193     2012      11        15        320              0.143000       0.396179       1.508490       0.256660   -9999.000000   -9999.000000       0.055800       0.448000
54430     54430     hebei          118.1381       40.7486           77       193     2012      11        16        321              0.149958       0.408051       0.656811       0.218852   -9999.000000   -9999.000000       0.041000       0.438000
54430     54430     hebei          118.1381       40.7486           77       193     2012      11        17        322              0.000000       0.455658       0.000000       0.243217       0.124000       0.197300       0.051000       0.434000
54430     54430     hebei          118.1381       40.7486           77       193     2012      11        18        323              0.142833       0.189087       0.000000       0.222216       0.132000   -9999.000000       0.048000       0.468000
54430     54430     hebei          118.1381       40.7486           77       193     2012      11        19        324              0.140333       0.119934       0.000000       0.211610       0.126000   -9999.000000       0.052500   -9999.000000
54430     54430     hebei          118.1381       40.7486           77       193     2012      11        20        325              0.135292      -0.192749       0.000000       0.209522       0.113000       0.080000       0.054400       0.314000
54430     54430     hebei          118.1381       40.7486           77       193     2012      11        21        326              0.133875      -0.303070       0.000000       0.191896   -9999.000000   -9999.000000       0.053000       0.329000
54430     54430     hebei          118.1381       40.7486           77       193     2012      11        22        327              0.133792       0.034546       0.612911       0.199622   -9999.000000   -9999.000000       0.040400       0.284000
54430     54430     hebei          118.1381       40.7486           77       193     2012      11        23        328              0.118333      -0.901672       0.000000       0.186632   -9999.000000   -9999.000000       0.049800       0.373000
54430     54430     hebei          118.1381       40.7486           77       193     2012      11        24        329              0.099174      -2.179413       0.000000       0.159217       0.090000   -9999.000000       0.047100       0.183000
54430     54430     hebei          118.1381       40.7486           77       193     2012      11        25        330              0.096583      -1.641144       0.000000       0.160579   -9999.000000       0.208600       0.050200       0.266000
54430     54430     hebei          118.1381       40.7486           77       193     2012      11        26        331              0.077375      -1.846008       0.000000       0.155589   -9999.000000   -9999.000000       0.050300       0.168000
54430     54430     hebei          118.1381       40.7486           77       193     2012      11        27        332              0.070542      -2.573364       0.000000       0.155363   -9999.000000       0.059600       0.040000       0.338000
54430     54430     hebei          118.1381       40.7486           77       193     2012      11        28        333              0.065875      -1.087036       0.000000       0.165440   -9999.000000   -9999.000000       0.045500       0.188000
54430     54430     hebei          118.1381       40.7486           77       193     2012      11        29        334              0.047583      -3.510681       0.000000       0.147013   -9999.000000   -9999.000000       0.047000       0.142000
54430     54430     hebei          118.1381       40.7486           77       193     2012      11        30        335              0.041130      -4.369019       0.000000       0.135700   -9999.000000   -9999.000000       0.040500       0.042000
54430     54430     hebei          118.1381       40.7486           77       193     2012      12        01        336              0.039250      -6.851318       0.000000       0.127838   -9999.000000   -9999.000000       0.049800       0.068000
54430     54430     hebei          118.1381       40.7486           77       193     2012      12        02        337              0.041292      -6.473267       0.000000       0.125888   -9999.000000   -9999.000000   -9999.000000       0.173000
54430     54430     hebei          118.1381       40.7486           77       193     2012      12        03        338              0.039958      -4.090027       0.000000       0.127239   -9999.000000   -9999.000000       0.038200       0.135000
54430     54430     hebei          118.1381       40.7486           77       193     2012      12        04        339              0.037125      -5.655884       0.000000       0.126958   -9999.000000   -9999.000000       0.045700       0.119000
54430     54430     hebei          118.1381       40.7486           77       193     2012      12        05        340              0.035667      -6.192108       0.000000       0.124613   -9999.000000   -9999.000000       0.039200       0.076000
54430     54430     hebei          118.1381       40.7486           77       193     2012      12        06        341              0.034125      -8.540894       0.000000       0.123452   -9999.000000   -9999.000000       0.044000       0.142000
54430     54430     hebei          118.1381       40.7486           77       193     2012      12        07        342              0.033417      -9.445343       0.000000       0.121061   -9999.000000   -9999.000000       0.046600       0.168000
54430     54430     hebei          118.1381       40.7486           77       193     2012      12        08        343              0.032667      -9.543488       0.000000       0.120528   -9999.000000   -9999.000000       0.046800   -9999.000000
54430     54430     hebei          118.1381       40.7486           77       193     2012      12        09        344              0.034125     -10.688232       0.000000       0.120022   -9999.000000   -9999.000000       0.042200       0.143000
54430     54430     hebei          118.1381       40.7486           77       193     2012      12        10        345              0.034696      -8.361847       0.000000       0.120791   -9999.000000   -9999.000000       0.042100       0.076000
54430     54430     hebei          118.1381       40.7486           77       193     2012      12        11        346              0.034250      -7.266296       0.000000       0.121435   -9999.000000   -9999.000000       0.034300       0.096000
54430     54430     hebei          118.1381       40.7486           77       193     2012      12        12        347              0.034500      -7.617493       0.000000       0.121094   -9999.000000   -9999.000000       0.046000       0.148000
54430     54430     hebei          118.1381       40.7486           77       193     2012      12        13        348              0.037667      -6.857910       1.260011       0.121534   -9999.000000   -9999.000000       0.045800   -9999.000000
54430     54430     hebei          118.1381       40.7486           77       193     2012      12        14        349              0.040333      -5.063477       1.404858       0.123028   -9999.000000   -9999.000000       0.040200       0.092000
54430     54430     hebei          118.1381       40.7486           77       193     2012      12        15        350              0.000000      -4.511658       1.687587       0.124541   -9999.000000   -9999.000000       0.046800       0.106000
54430     54430     hebei          118.1381       40.7486           77       193     2012      12        16        351              0.044111      -3.689209       0.247275       0.136096   -9999.000000   -9999.000000       0.042900       0.057000
54430     54430     hebei          118.1381       40.7486           77       193     2012      12        17        352              0.036652      -4.700470       0.000000       0.127805   -9999.000000   -9999.000000       0.037600       0.105000
54430     54430     hebei          118.1381       40.7486           77       193     2012      12        18        353              0.033826      -8.273285       0.000000       0.123537   -9999.000000   -9999.000000       0.042800   -9999.000000
54430     54430     hebei          118.1381       40.7486           77       193     2012      12        19        354              0.033125     -10.453705       0.000000       0.119688   -9999.000000   -9999.000000       0.041100       0.020000
54430     54430     hebei          118.1381       40.7486           77       193     2012      12        20        355              0.000000     -10.461090       0.544298       0.119249   -9999.000000   -9999.000000       0.034300       0.019000
54430     54430     hebei          118.1381       40.7486           77       193     2012      12        21        356              0.035250      -8.504303       0.239570       0.119533   -9999.000000   -9999.000000       0.038100       0.110000
54430     54430     hebei          118.1381       40.7486           77       193     2012      12        22        357              0.033667      -7.464661       0.000000       0.120091   -9999.000000   -9999.000000       0.035300       0.057000
54430     54430     hebei          118.1381       40.7486           77       193     2012      12        23        358              0.031333      -9.862152       0.000000       0.118851   -9999.000000   -9999.000000   -9999.000000       0.052000
54430     54430     hebei          118.1381       40.7486           77       193     2012      12        24        359              0.030000     -14.427216       0.000000       0.116246   -9999.000000   -9999.000000       0.036600       0.015000
54430     54430     hebei          118.1381       40.7486           77       193     2012      12        25        360              0.030250     -13.547729       0.000000       0.114505   -9999.000000   -9999.000000       0.031600       0.042000
54430     54430     hebei          118.1381       40.7486           77       193     2012      12        26        361              0.000000     -14.446625       0.000000       0.114006   -9999.000000   -9999.000000       0.034400       0.059000
54430     54430     hebei          118.1381       40.7486           77       193     2012      12        27        362              0.030000     -14.186066       0.000000       0.113680   -9999.000000   -9999.000000       0.035000       0.068000
54430     54430     hebei          118.1381       40.7486           77       193     2012      12        28        363              0.030000     -13.094269       1.508445       0.114045   -9999.000000   -9999.000000       0.031200       0.046000
54430     54430     hebei          118.1381       40.7486           77       193     2012      12        29        364              0.000000     -10.624176       0.000000       0.114573   -9999.000000   -9999.000000   -9999.000000       0.048000
54430     54430     hebei          118.1381       40.7486           77       193     2012      12        30        365              0.000000      -9.892883       0.000000       0.115183   -9999.000000   -9999.000000       0.033900       0.045000
54430     54430     hebei          118.1381       40.7486           77       193     2012      12        31        366              0.030133     -10.141296       0.000000       0.115246   -9999.000000   -9999.000000       0.026200   -9999.000000
