# Supplementary material for: Research on Fusing Multisatellite Soil Moisture Data Based on Bayesian Model Averaging
Source: Hindawi journal article supplement (doi:10.1155/2018/9310838), 2018-06-25
Supplement: f1 [file 9310838.f1.zip › 2012_sm00-10cm_daily_ZDB_ZHY_54502_366days_allin.txt]

54502     54502     hebei          116.0350       39.4750           82       184     2012      01        01        001              0.000000   -9999.000000       0.000000   -9999.000000   -9999.000000   -9999.000000       0.019300   -9999.000000
54502     54502     hebei          116.0350       39.4750           82       184     2012      01        02        002              0.047042      -3.896301       0.000000       0.146063   -9999.000000   -9999.000000       0.026300       0.207000
54502     54502     hebei          116.0350       39.4750           82       184     2012      01        03        003              0.000000      -2.857544       0.000000       0.158904   -9999.000000   -9999.000000       0.032000       0.181000
54502     54502     hebei          116.0350       39.4750           82       184     2012      01        04        004              0.041458      -3.799652       1.455752       0.152848   -9999.000000   -9999.000000       0.033100       0.004000
54502     54502     hebei          116.0350       39.4750           82       184     2012      01        05        005              0.041083      -4.190430       0.000000       0.152448   -9999.000000   -9999.000000       0.018300       0.207000
54502     54502     hebei          116.0350       39.4750           82       184     2012      01        06        006              0.043917      -3.686890       0.000000       0.155581   -9999.000000   -9999.000000       0.032800       0.056000
54502     54502     hebei          116.0350       39.4750           82       184     2012      01        07        007              0.046542      -3.930206       0.000000       0.144244   -9999.000000   -9999.000000       0.012400       0.238000
54502     54502     hebei          116.0350       39.4750           82       184     2012      01        08        008              0.000000      -3.792572       0.000000       0.148139   -9999.000000   -9999.000000       0.033900       0.165000
54502     54502     hebei          116.0350       39.4750           82       184     2012      01        09        009              0.043375      -3.018341       0.000000       0.159901   -9999.000000   -9999.000000       0.030700   -9999.000000
54502     54502     hebei          116.0350       39.4750           82       184     2012      01        10        010              0.043167      -2.566986       0.000000       0.167952   -9999.000000   -9999.000000       0.017600       0.175000
54502     54502     hebei          116.0350       39.4750           82       184     2012      01        11        011              0.041208      -2.496857       0.000000       0.169858   -9999.000000   -9999.000000       0.019100       0.058000
54502     54502     hebei          116.0350       39.4750           82       184     2012      01        12        012              0.041125      -3.919281       0.583045       0.153636   -9999.000000   -9999.000000       0.033900       0.342000
54502     54502     hebei          116.0350       39.4750           82       184     2012      01        13        013              0.042792      -2.650970       0.353723       0.166903   -9999.000000   -9999.000000       0.024000       0.148000
54502     54502     hebei          116.0350       39.4750           82       184     2012      01        14        014              0.044000      -1.680145       0.000000       0.184863   -9999.000000   -9999.000000       0.031500   -9999.000000
54502     54502     hebei          116.0350       39.4750           82       184     2012      01        15        015              0.045083      -1.204346       0.000000       0.191559   -9999.000000   -9999.000000   -9999.000000       0.276000
54502     54502     hebei          116.0350       39.4750           82       184     2012      01        16        016              0.046458      -1.446014       0.000000       0.186024   -9999.000000   -9999.000000       0.012900       0.160000
54502     54502     hebei          116.0350       39.4750           82       184     2012      01        17        017              0.000000      -2.073578       0.000000       0.168215   -9999.000000   -9999.000000       0.034800       0.172000
54502     54502     hebei          116.0350       39.4750           82       184     2012      01        18        018              0.049208      -1.759552       0.000000       0.177502   -9999.000000   -9999.000000       0.019500       0.103000
54502     54502     hebei          116.0350       39.4750           82       184     2012      01        19        019              0.050792      -2.293762       0.000000       0.166622   -9999.000000   -9999.000000       0.027800   -9999.000000
54502     54502     hebei          116.0350       39.4750           82       184     2012      01        20        020              0.049875      -1.442108       0.000000       0.179141   -9999.000000   -9999.000000       0.032400       0.285000
54502     54502     hebei          116.0350       39.4750           82       184     2012      01        21        021              0.042958      -3.219452       0.000000       0.161614   -9999.000000   -9999.000000       0.035300       0.159000
54502     54502     hebei          116.0350       39.4750           82       184     2012      01        22        022              0.039208      -5.786072       0.717042       0.143458   -9999.000000   -9999.000000       0.010000       0.208000
54502     54502     hebei          116.0350       39.4750           82       184     2012      01        23        023              0.038417      -5.828033       0.000000       0.134930   -9999.000000   -9999.000000       0.032300       0.249000
54502     54502     hebei          116.0350       39.4750           82       184     2012      01        24        024              0.038667      -5.018158       0.000000       0.147760   -9999.000000   -9999.000000   -9999.000000   -9999.000000
54502     54502     hebei          116.0350       39.4750           82       184     2012      01        25        025              0.039458      -4.328094       0.000000       0.155876   -9999.000000   -9999.000000       0.034500       0.244000
54502     54502     hebei          116.0350       39.4750           82       184     2012      01        26        026              0.040750      -3.161011       0.000000       0.164774   -9999.000000   -9999.000000       0.036800       0.233000
54502     54502     hebei          116.0350       39.4750           82       184     2012      01        27        027              0.042667      -2.019684       0.000000       0.180327   -9999.000000   -9999.000000       0.018700       0.179000
54502     54502     hebei          116.0350       39.4750           82       184     2012      01        28        028              0.044000      -2.124542       0.000000       0.174139   -9999.000000   -9999.000000       0.025000       0.028000
54502     54502     hebei          116.0350       39.4750           82       184     2012      01        29        029              0.042833      -3.190674       0.000000       0.162136   -9999.000000   -9999.000000       0.035900       0.107000
54502     54502     hebei          116.0350       39.4750           82       184     2012      01        30        030              0.043667      -3.517853       0.000000       0.158852   -9999.000000   -9999.000000       0.027600       0.081000
54502     54502     hebei          116.0350       39.4750           82       184     2012      01        31        031              0.043708      -3.655212       0.000000       0.152901   -9999.000000   -9999.000000       0.035900       0.144000
54502     54502     hebei          116.0350       39.4750           82       184     2012      02        01        032              0.040750      -3.272736       4.331044       0.172600   -9999.000000   -9999.000000   -9999.000000       0.084000
54502     54502     hebei          116.0350       39.4750           82       184     2012      02        02        033              0.039917      -5.233795       3.277124       0.148908   -9999.000000   -9999.000000       0.013300       0.031000
54502     54502     hebei          116.0350       39.4750           82       184     2012      02        03        034              0.041708      -5.040802       0.000000       0.146277   -9999.000000   -9999.000000       0.036400       0.137000
54502     54502     hebei          116.0350       39.4750           82       184     2012      02        04        035              0.043833      -3.286133       0.000000       0.166466   -9999.000000   -9999.000000       0.024600       0.100000
54502     54502     hebei          116.0350       39.4750           82       184     2012      02        05        036              0.048250      -2.688232       0.000000       0.165371   -9999.000000   -9999.000000       0.026800       0.131000
54502     54502     hebei          116.0350       39.4750           82       184     2012      02        06        037              0.047708      -0.888397       4.477737       0.193880   -9999.000000   -9999.000000       0.035700       0.127000
54502     54502     hebei          116.0350       39.4750           82       184     2012      02        07        038              0.045250      -3.483185       0.000000       0.168931   -9999.000000   -9999.000000       0.038000   -9999.000000
54502     54502     hebei          116.0350       39.4750           82       184     2012      02        08        039              0.046958      -3.971497       0.000000       0.154628   -9999.000000   -9999.000000       0.013200       0.242000
54502     54502     hebei          116.0350       39.4750           82       184     2012      02        09        040              0.047500      -2.318939       0.000000       0.177691   -9999.000000   -9999.000000       0.035900       0.059000
54502     54502     hebei          116.0350       39.4750           82       184     2012      02        10        041              0.051625      -1.755066       0.000000       0.181448   -9999.000000   -9999.000000       0.012400       0.261000
54502     54502     hebei          116.0350       39.4750           82       184     2012      02        11        042              0.052292      -0.841736       0.000000       0.201132   -9999.000000   -9999.000000       0.038000       0.281000
54502     54502     hebei          116.0350       39.4750           82       184     2012      02        12        043              0.052667      -0.420319       0.000000       0.204803   -9999.000000   -9999.000000       0.039600   -9999.000000
54502     54502     hebei          116.0350       39.4750           82       184     2012      02        13        044              0.056792      -1.064941       0.000000       0.193420   -9999.000000   -9999.000000   -9999.000000       0.308000
54502     54502     hebei          116.0350       39.4750           82       184     2012      02        14        045              0.057792       0.570740       0.000000       0.220047   -9999.000000   -9999.000000       0.024000       0.092000
54502     54502     hebei          116.0350       39.4750           82       184     2012      02        15        046              0.056292       0.087128       0.000000       0.216333   -9999.000000   -9999.000000       0.038600       0.104000
54502     54502     hebei          116.0350       39.4750           82       184     2012      02        16        047              0.059417      -0.138336       0.000000       0.208110       0.085000   -9999.000000       0.027700       0.219000
54502     54502     hebei          116.0350       39.4750           82       184     2012      02        17        048              0.056208       0.105438       0.000000       0.214116   -9999.000000   -9999.000000       0.038100   -9999.000000
54502     54502     hebei          116.0350       39.4750           82       184     2012      02        18        049              0.054208      -1.130707       0.000000       0.197505   -9999.000000   -9999.000000   -9999.000000       0.328000
54502     54502     hebei          116.0350       39.4750           82       184     2012      02        19        050              0.059167      -0.726471       0.000000       0.201658       0.068000   -9999.000000       0.010300       0.295000
54502     54502     hebei          116.0350       39.4750           82       184     2012      02        20        051              0.064167       0.627319       0.000000       0.218061       0.073000   -9999.000000       0.038400       0.273000
54502     54502     hebei          116.0350       39.4750           82       184     2012      02        21        052              0.064708       1.540894       0.000000       0.233868   -9999.000000   -9999.000000   -9999.000000       0.106000
54502     54502     hebei          116.0350       39.4750           82       184     2012      02        22        053              0.068875       1.156311       0.259442       0.229636   -9999.000000   -9999.000000       0.031800   -9999.000000
54502     54502     hebei          116.0350       39.4750           82       184     2012      02        23        054              0.080375       1.951355       0.000000       0.252499   -9999.000000   -9999.000000       0.037900       0.323000
54502     54502     hebei          116.0350       39.4750           82       184     2012      02        24        055              0.073304       2.434021       0.000000       0.249064   -9999.000000   -9999.000000       0.037900       0.312000
54502     54502     hebei          116.0350       39.4750           82       184     2012      02        25        056              0.078417       1.129547       0.000000       0.236607       0.077000   -9999.000000       0.011700       0.248000
54502     54502     hebei          116.0350       39.4750           82       184     2012      02        26        057              0.081667       1.356567       0.000000       0.237454       0.083000   -9999.000000       0.036700       0.115000
54502     54502     hebei          116.0350       39.4750           82       184     2012      02        27        058              0.078375       2.048309       0.000000       0.241707   -9999.000000   -9999.000000   -9999.000000       0.285000
54502     54502     hebei          116.0350       39.4750           82       184     2012      02        28        059              0.083458       2.126526       0.000000       0.245797   -9999.000000   -9999.000000       0.034600       0.140000
54502     54502     hebei          116.0350       39.4750           82       184     2012      02        29        060              0.000000   -9999.000000       0.000000   -9999.000000       0.071000   -9999.000000   -9999.000000   -9999.000000
54502     54502     hebei          116.0350       39.4750           82       184     2012      03        01        061              0.096083       2.936951       0.182431       0.260622   -9999.000000   -9999.000000       0.010000       0.364000
54502     54502     hebei          116.0350       39.4750           82       184     2012      03        02        062              0.097708       2.066772       0.000000       0.269470   -9999.000000   -9999.000000       0.038500       0.051000
54502     54502     hebei          116.0350       39.4750           82       184     2012      03        03        063              0.097167       1.838959       0.000000       0.262470   -9999.000000   -9999.000000       0.012000       0.187000
54502     54502     hebei          116.0350       39.4750           82       184     2012      03        04        064              0.093917       1.952454       0.000000       0.257289   -9999.000000   -9999.000000       0.024800       0.125000
54502     54502     hebei          116.0350       39.4750           82       184     2012      03        05        065              0.087667       2.484802       0.000000       0.256846   -9999.000000   -9999.000000       0.044400       0.322000
54502     54502     hebei          116.0350       39.4750           82       184     2012      03        06        066              0.093250       2.106750       0.000000       0.264324       0.081000   -9999.000000   -9999.000000       0.369000
54502     54502     hebei          116.0350       39.4750           82       184     2012      03        07        067              0.000000       4.366943       0.000000       0.271945       0.085000   -9999.000000       0.010000   -9999.000000
54502     54502     hebei          116.0350       39.4750           82       184     2012      03        08        068              0.097958       5.059998       0.000000       0.273135   -9999.000000   -9999.000000       0.034900       0.277000
54502     54502     hebei          116.0350       39.4750           82       184     2012      03        09        069              0.095417       2.229889       0.000000       0.249404   -9999.000000   -9999.000000       0.030500       0.218000
54502     54502     hebei          116.0350       39.4750           82       184     2012      03        10        070              0.097583       3.056213       0.000000       0.261088       0.063000   -9999.000000       0.035400       0.300000
54502     54502     hebei          116.0350       39.4750           82       184     2012      03        11        071              0.095875       3.379608       0.406443       0.249402       0.073000   -9999.000000       0.041900       0.355000
54502     54502     hebei          116.0350       39.4750           82       184     2012      03        12        072              0.098417       2.419647       0.000000       0.245110       0.081000   -9999.000000       0.023100   -9999.000000
54502     54502     hebei          116.0350       39.4750           82       184     2012      03        13        073              0.102583       4.132782       0.000000       0.269424       0.088000   -9999.000000       0.012700       0.387000
54502     54502     hebei          116.0350       39.4750           82       184     2012      03        14        074              0.103542       7.065704       0.000000       0.288036   -9999.000000   -9999.000000       0.039000       0.331000
54502     54502     hebei          116.0350       39.4750           82       184     2012      03        15        075              0.102292       7.148438       6.316250       0.283472   -9999.000000   -9999.000000       0.020500       0.310000
54502     54502     hebei          116.0350       39.4750           82       184     2012      03        16        076              0.103167       6.542847       0.000000       0.289346       0.078000   -9999.000000       0.047300       0.405000
54502     54502     hebei          116.0350       39.4750           82       184     2012      03        17        077              0.100542       9.089020       2.915947       0.290883       0.075000   -9999.000000   -9999.000000   -9999.000000
54502     54502     hebei          116.0350       39.4750           82       184     2012      03        18        078              0.104250       5.629028       0.407326       0.296501   -9999.000000   -9999.000000       0.011100       0.767000
54502     54502     hebei          116.0350       39.4750           82       184     2012      03        19        079              0.106083       3.354736       0.000000       0.294315   -9999.000000   -9999.000000       0.048200       0.489000
54502     54502     hebei          116.0350       39.4750           82       184     2012      03        20        080              0.111375       3.758362       0.000000       0.293611   -9999.000000   -9999.000000       0.036900       0.408000
54502     54502     hebei          116.0350       39.4750           82       184     2012      03        21        081              0.113958       7.314240       0.134946       0.297486       0.080000   -9999.000000       0.046500       0.418000
54502     54502     hebei          116.0350       39.4750           82       184     2012      03        22        082              0.112875       8.836884       0.049104       0.296950       0.111000   -9999.000000       0.061200   -9999.000000
54502     54502     hebei          116.0350       39.4750           82       184     2012      03        23        083              0.115000       7.159882       0.000000       0.297481       0.088000   -9999.000000       0.048300       0.565000
54502     54502     hebei          116.0350       39.4750           82       184     2012      03        24        084              0.117958       8.539246       0.000000       0.293554   -9999.000000   -9999.000000   -9999.000000       0.291000
54502     54502     hebei          116.0350       39.4750           82       184     2012      03        25        085              0.000000      10.763580       0.000000       0.290009   -9999.000000   -9999.000000       0.044800       0.380000
54502     54502     hebei          116.0350       39.4750           82       184     2012      03        26        086              0.116708      10.451691       0.000000       0.288238       0.066000   -9999.000000       0.036900   -9999.000000
54502     54502     hebei          116.0350       39.4750           82       184     2012      03        27        087              0.117917      12.594849       0.000000       0.286220       0.074000   -9999.000000       0.040700       0.351000
54502     54502     hebei          116.0350       39.4750           82       184     2012      03        28        088              0.115167      14.848236       0.000000       0.282383       0.081000   -9999.000000       0.048600       0.257000
54502     54502     hebei          116.0350       39.4750           82       184     2012      03        29        089              0.113583      14.491394       0.000000       0.279994       0.084000   -9999.000000       0.026300       0.491000
54502     54502     hebei          116.0350       39.4750           82       184     2012      03        30        090              0.109125      14.855408       0.000000       0.276238   -9999.000000   -9999.000000       0.020600       0.437000
54502     54502     hebei          116.0350       39.4750           82       184     2012      03        31        091              0.106000      11.509674       0.000000       0.274115       0.061000   -9999.000000       0.043900       0.181000
54502     54502     hebei          116.0350       39.4750           82       184     2012      04        01        092              0.102792      11.366364       0.139823       0.272961       0.077000   -9999.000000       0.026900       0.310000
54502     54502     hebei          116.0350       39.4750           82       184     2012      04        02        093              0.099542      10.208221       0.000000       0.273556       0.095000   -9999.000000       0.049800       0.306000
54502     54502     hebei          116.0350       39.4750           82       184     2012      04        03        094              0.101917       8.606964       0.000000       0.276443       0.102000   -9999.000000   -9999.000000       0.453000
54502     54502     hebei          116.0350       39.4750           82       184     2012      04        04        095              0.100333      12.916046       0.000000       0.272500   -9999.000000   -9999.000000       0.010000       0.431000
54502     54502     hebei          116.0350       39.4750           82       184     2012      04        05        096              0.097875      14.778168       0.000000       0.267454   -9999.000000   -9999.000000       0.049400   -9999.000000
54502     54502     hebei          116.0350       39.4750           82       184     2012      04        06        097              0.095500      14.866241       0.000000       0.264125       0.097000   -9999.000000       0.032700       0.485000
54502     54502     hebei          116.0350       39.4750           82       184     2012      04        07        098              0.093542      15.162109       0.000000       0.259817       0.085000   -9999.000000       0.039500       0.360000
54502     54502     hebei          116.0350       39.4750           82       184     2012      04        08        099              0.092083      15.574829       0.000000       0.258875       0.095000   -9999.000000       0.047900       0.588000
54502     54502     hebei          116.0350       39.4750           82       184     2012      04        09        100              0.091708      18.145569       0.000000       0.253837       0.101000   -9999.000000       0.047800       0.440000
54502     54502     hebei          116.0350       39.4750           82       184     2012      04        10        101              0.089917      19.754181       0.000000       0.251876       0.112000   -9999.000000       0.018900   -9999.000000
54502     54502     hebei          116.0350       39.4750           82       184     2012      04        11        102              0.088261      18.048126       0.000000       0.252424       0.105500   -9999.000000       0.047000       0.538000
54502     54502     hebei          116.0350       39.4750           82       184     2012      04        12        103              0.088458      16.402649       0.000000       0.248779       0.099000   -9999.000000       0.032700       0.428000
54502     54502     hebei          116.0350       39.4750           82       184     2012      04        13        104              0.088083      18.963287       0.000000       0.243790       0.105000   -9999.000000       0.045800       0.523000
54502     54502     hebei          116.0350       39.4750           82       184     2012      04        14        105              0.086708      20.085999       0.000000       0.239374       0.107500   -9999.000000       0.043000       0.395000
54502     54502     hebei          116.0350       39.4750           82       184     2012      04        15        106              0.084042      21.771515       0.000000       0.231402   -9999.000000   -9999.000000       0.022400   -9999.000000
54502     54502     hebei          116.0350       39.4750           82       184     2012      04        16        107              0.083478      19.613403       0.000000       0.228446       0.095000   -9999.000000       0.027800       0.496000
54502     54502     hebei          116.0350       39.4750           82       184     2012      04        17        108              0.083667      18.736542       0.000000       0.226139       0.102000   -9999.000000   -9999.000000       0.468000
54502     54502     hebei          116.0350       39.4750           82       184     2012      04        18        109              0.161958      21.057281       2.127410       0.224649       0.103000   -9999.000000   -9999.000000       0.441000
54502     54502     hebei          116.0350       39.4750           82       184     2012      04        19        110              0.232125      20.122437       0.000000       0.238939       0.125000   -9999.000000       0.055600       0.514000
54502     54502     hebei          116.0350       39.4750           82       184     2012      04        20        111              0.219750      18.138702       2.700881       0.246683   -9999.000000   -9999.000000   -9999.000000   -9999.000000
54502     54502     hebei          116.0350       39.4750           82       184     2012      04        21        112              0.215125      16.781403       0.000000       0.256972   -9999.000000   -9999.000000       0.025900       0.930000
54502     54502     hebei          116.0350       39.4750           82       184     2012      04        22        113              0.200250      16.702423       0.000000       0.263061       0.163500   -9999.000000       0.048600       0.612000
54502     54502     hebei          116.0350       39.4750           82       184     2012      04        23        114              0.188292      21.057709       5.504053       0.252561       0.128000   -9999.000000       0.045100       0.551000
54502     54502     hebei          116.0350       39.4750           82       184     2012      04        24        115              0.262458      21.294373      32.191017       0.258436   -9999.000000   -9999.000000       0.076900       0.980000
54502     54502     hebei          116.0350       39.4750           82       184     2012      04        25        116              0.000000      15.133179       0.000000       0.352952   -9999.000000   -9999.000000       0.073500       0.965000
54502     54502     hebei          116.0350       39.4750           82       184     2012      04        26        117              0.206333      16.637421       0.000000       0.314908       0.212000   -9999.000000       0.060400       0.599000
54502     54502     hebei          116.0350       39.4750           82       184     2012      04        27        118              0.190583      19.036530       0.000000       0.302813       0.157500   -9999.000000   -9999.000000       0.514000
54502     54502     hebei          116.0350       39.4750           82       184     2012      04        28        119              0.176042      19.310944       0.000000       0.291958       0.129000   -9999.000000       0.055500       0.457000
54502     54502     hebei          116.0350       39.4750           82       184     2012      04        29        120              0.169958      17.475189       0.378516       0.285955       0.119000   -9999.000000       0.040700       0.334000
54502     54502     hebei          116.0350       39.4750           82       184     2012      04        30        121              0.170739      17.781067       0.000000       0.281501       0.163000   -9999.000000       0.065100       0.488000
54502     54502     hebei          116.0350       39.4750           82       184     2012      05        01        122              0.168167      20.388641       0.000000       0.278141       0.231000   -9999.000000       0.071300       0.466000
54502     54502     hebei          116.0350       39.4750           82       184     2012      05        02        123              0.167833      20.845642       0.000000       0.275273       0.164500   -9999.000000       0.041900       0.510000
54502     54502     hebei          116.0350       39.4750           82       184     2012      05        03        124              0.165667      23.589691       0.000000       0.268341       0.170500   -9999.000000       0.050200       0.461000
54502     54502     hebei          116.0350       39.4750           82       184     2012      05        04        125              0.160583      25.089783       0.000000       0.258813       0.152000   -9999.000000       0.068400   -9999.000000
54502     54502     hebei          116.0350       39.4750           82       184     2012      05        05        126              0.154458      25.938873       0.000000       0.250687       0.157000   -9999.000000       0.051500       0.532000
54502     54502     hebei          116.0350       39.4750           82       184     2012      05        06        127              0.149542      24.808411       1.651703       0.239904       0.203000   -9999.000000       0.061900       0.430000
54502     54502     hebei          116.0350       39.4750           82       184     2012      05        07        128              0.143250      25.396362       0.000000       0.233848   -9999.000000   -9999.000000   -9999.000000       0.561000
54502     54502     hebei          116.0350       39.4750           82       184     2012      05        08        129              0.140375      24.286530       0.000000       0.228229       0.158000       0.093100       0.043400       0.496000
54502     54502     hebei          116.0350       39.4750           82       184     2012      05        09        130              0.135458      25.104980       1.088092       0.221078       0.155000   -9999.000000       0.074600   -9999.000000
54502     54502     hebei          116.0350       39.4750           82       184     2012      05        10        131              0.138917      23.625122       1.310988       0.219935       0.162000   -9999.000000       0.063400       0.566000
54502     54502     hebei          116.0350       39.4750           82       184     2012      05        11        132              0.132292      26.635834       7.214670       0.219333       0.333000   -9999.000000       0.069300       0.408000
54502     54502     hebei          116.0350       39.4750           82       184     2012      05        12        133              0.150792      20.820770       2.707111       0.251940       0.245000   -9999.000000       0.082300       0.888000
54502     54502     hebei          116.0350       39.4750           82       184     2012      05        13        134              0.148292      21.667816       0.641829       0.283004       0.193000   -9999.000000       0.078400       0.470000
54502     54502     hebei          116.0350       39.4750           82       184     2012      05        14        135              0.143875      21.068665       0.000000       0.268185       0.166000   -9999.000000       0.050600   -9999.000000
54502     54502     hebei          116.0350       39.4750           82       184     2012      05        15        136              0.140542      21.640259       0.000000       0.252562       0.174000   -9999.000000       0.089600       0.493000
54502     54502     hebei          116.0350       39.4750           82       184     2012      05        16        137              0.136958      22.287048       0.000000       0.241498       0.193000   -9999.000000       0.057100       0.492000
54502     54502     hebei          116.0350       39.4750           82       184     2012      05        17        138              0.133958      23.137329       0.000000       0.229729       0.215000   -9999.000000       0.087700       0.407000
54502     54502     hebei          116.0350       39.4750           82       184     2012      05        18        139              0.130708      24.970184       0.042259       0.220017       0.181000   -9999.000000       0.090200       0.398000
54502     54502     hebei          116.0350       39.4750           82       184     2012      05        19        140              0.128083      26.170471       0.721799       0.211750       0.150000   -9999.000000       0.063300   -9999.000000
54502     54502     hebei          116.0350       39.4750           82       184     2012      05        20        141              0.122958      27.237793       0.240860       0.207715       0.168000   -9999.000000       0.071600       0.549000
54502     54502     hebei          116.0350       39.4750           82       184     2012      05        21        142              0.119708      24.839996       0.000000       0.208225       0.213000   -9999.000000       0.129400       0.574000
54502     54502     hebei          116.0350       39.4750           82       184     2012      05        22        143              0.118292      24.317139       0.000000       0.202736       0.205000   -9999.000000       0.105000       0.403000
54502     54502     hebei          116.0350       39.4750           82       184     2012      05        23        144              0.116750      25.554413       0.000000       0.194795   -9999.000000   -9999.000000       0.120900       0.402000
54502     54502     hebei          116.0350       39.4750           82       184     2012      05        24        145              0.113917      25.373352       0.000000       0.183512       0.164000   -9999.000000   -9999.000000       0.448000
54502     54502     hebei          116.0350       39.4750           82       184     2012      05        25        146              0.000000      26.082947       0.349095       0.174891       0.165000   -9999.000000       0.068300       0.364000
54502     54502     hebei          116.0350       39.4750           82       184     2012      05        26        147              0.109458      25.026184       0.000000       0.174880       0.154000   -9999.000000       0.122200       0.470000
54502     54502     hebei          116.0350       39.4750           82       184     2012      05        27        148              0.106583      28.225128       0.000000       0.168876       0.231000   -9999.000000       0.097800       0.525000
54502     54502     hebei          116.0350       39.4750           82       184     2012      05        28        149              0.103870      30.025940       0.000000       0.164378       0.163000   -9999.000000       0.105600       0.384000
54502     54502     hebei          116.0350       39.4750           82       184     2012      05        29        150              0.097208      30.770050       1.437081       0.162031       0.213500   -9999.000000       0.129100       0.361000
54502     54502     hebei          116.0350       39.4750           82       184     2012      05        30        151              0.099542      24.548950       0.000000       0.180073       0.171000   -9999.000000       0.120800   -9999.000000
54502     54502     hebei          116.0350       39.4750           82       184     2012      05        31        152              0.097042      26.825134       2.785744       0.169346       0.190000   -9999.000000   -9999.000000   -9999.000000
54502     54502     hebei          116.0350       39.4750           82       184     2012      06        01        153              0.095667      25.707275       0.259195       0.181872       0.233000   -9999.000000       0.128000       0.555000
54502     54502     hebei          116.0350       39.4750           82       184     2012      06        02        154              0.096250      24.455780       0.000000       0.191901       0.194000   -9999.000000       0.099000   -9999.000000
54502     54502     hebei          116.0350       39.4750           82       184     2012      06        03        155              0.092083      26.720886       0.852705       0.177699       0.206500   -9999.000000       0.134400       0.591000
54502     54502     hebei          116.0350       39.4750           82       184     2012      06        04        156              0.097292      24.527405       0.840498       0.181079       0.159000   -9999.000000       0.140700       0.621000
54502     54502     hebei          116.0350       39.4750           82       184     2012      06        05        157              0.096250      28.374908       0.000000       0.177974       0.161000   -9999.000000       0.086500       0.550000
54502     54502     hebei          116.0350       39.4750           82       184     2012      06        06        158              0.091417      29.993225       5.362965       0.165604       0.211000   -9999.000000       0.145800       0.511000
54502     54502     hebei          116.0350       39.4750           82       184     2012      06        07        159              0.089417      28.936340       0.072663       0.158552       0.210000   -9999.000000       0.100100   -9999.000000
54502     54502     hebei          116.0350       39.4750           82       184     2012      06        08        160              0.088167      29.582855       0.000000       0.154775       0.171000   -9999.000000       0.127600       0.508000
54502     54502     hebei          116.0350       39.4750           82       184     2012      06        09        161              0.096333      31.151611      11.540471       0.151250   -9999.000000   -9999.000000       0.116400       0.843000
54502     54502     hebei          116.0350       39.4750           82       184     2012      06        10        162              0.125609      29.324097       0.000000       0.228884       0.157000   -9999.000000   -9999.000000       0.788000
54502     54502     hebei          116.0350       39.4750           82       184     2012      06        11        163              0.000000      25.196808       0.000000       0.241106       0.115000   -9999.000000       0.104800       0.534000
54502     54502     hebei          116.0350       39.4750           82       184     2012      06        12        164              0.123792      26.721283       0.000000       0.208874       0.172000   -9999.000000       0.176100   -9999.000000
54502     54502     hebei          116.0350       39.4750           82       184     2012      06        13        165              0.117250      26.626801       0.226125       0.190795       0.137000   -9999.000000       0.157800       0.543000
54502     54502     hebei          116.0350       39.4750           82       184     2012      06        14        166              0.119619      25.035675       0.000000       0.179572       0.140500   -9999.000000       0.157300       0.501000
54502     54502     hebei          116.0350       39.4750           82       184     2012      06        15        167              0.114087      26.541290       0.195002       0.168247       0.122000   -9999.000000       0.173200       0.480000
54502     54502     hebei          116.0350       39.4750           82       184     2012      06        16        168              0.112125      27.854248       0.000000       0.159541       0.133500   -9999.000000       0.139500       0.392000
54502     54502     hebei          116.0350       39.4750           82       184     2012      06        17        169              0.106167      31.071259       0.329449       0.153394       0.182000   -9999.000000       0.121900   -9999.000000
54502     54502     hebei          116.0350       39.4750           82       184     2012      06        18        170              0.099250      33.261719       0.241065       0.150295       0.128500   -9999.000000       0.103100       0.580000
54502     54502     hebei          116.0350       39.4750           82       184     2012      06        19        171              0.095000      31.539581       0.617510       0.150280       0.147000   -9999.000000       0.089500   -9999.000000
54502     54502     hebei          116.0350       39.4750           82       184     2012      06        20        172              0.090417      31.838013       0.529364       0.152207       0.149000   -9999.000000       0.100200       0.485000
54502     54502     hebei          116.0350       39.4750           82       184     2012      06        21        173              0.170500      30.524048      13.115561       0.151457       0.143000   -9999.000000   -9999.000000       1.000000
54502     54502     hebei          116.0350       39.4750           82       184     2012      06        22        174              0.223042      30.711853       0.528123       0.224823       0.209000   -9999.000000       0.062400       0.961000
54502     54502     hebei          116.0350       39.4750           82       184     2012      06        23        175              0.232625      28.103027       4.441511       0.247367       0.211000   -9999.000000       0.121200       1.000000
54502     54502     hebei          116.0350       39.4750           82       184     2012      06        24        176              0.278750      27.780975      50.382278       0.245243       0.160000   -9999.000000       0.104000       1.000000
54502     54502     hebei          116.0350       39.4750           82       184     2012      06        25        177              0.258250      25.560822      26.664722       0.329270       0.193000   -9999.000000       0.196600       0.914000
54502     54502     hebei          116.0350       39.4750           82       184     2012      06        26        178              0.238250      26.049377       6.705533       0.354325       0.207000   -9999.000000       0.221500       1.000000
54502     54502     hebei          116.0350       39.4750           82       184     2012      06        27        179              0.220875      25.665680       1.793144       0.347411       0.195000   -9999.000000       0.144700       0.927000
54502     54502     hebei          116.0350       39.4750           82       184     2012      06        28        180              0.245458      26.337524      20.908634       0.324798       0.296000   -9999.000000       0.114500       0.938000
54502     54502     hebei          116.0350       39.4750           82       184     2012      06        29        181              0.277750      24.158386       4.254288       0.345497       0.205500   -9999.000000       0.173100       1.000000
54502     54502     hebei          116.0350       39.4750           82       184     2012      06        30        182              0.251792      25.176147       0.000000       0.345185       0.167000   -9999.000000       0.171200   -9999.000000
54502     54502     hebei          116.0350       39.4750           82       184     2012      07        01        183              0.232125      28.511780       0.259290       0.322691       0.183000   -9999.000000       0.185900   -9999.000000
54502     54502     hebei          116.0350       39.4750           82       184     2012      07        02        184              0.210522      29.876038       0.000000       0.312086       0.185000   -9999.000000       0.184300       0.880000
54502     54502     hebei          116.0350       39.4750           82       184     2012      07        03        185              0.200333      29.117523       1.195123       0.302182       0.258000   -9999.000000       0.140300       0.675000
54502     54502     hebei          116.0350       39.4750           82       184     2012      07        04        186              0.190042      29.748749       0.257763       0.297280       0.195000       0.228000       0.139400       0.600000
54502     54502     hebei          116.0350       39.4750           82       184     2012      07        05        187              0.184875      28.791229       4.241917       0.292602       0.179000   -9999.000000       0.192600       1.000000
54502     54502     hebei          116.0350       39.4750           82       184     2012      07        06        188              0.184833      27.447083       0.874441       0.301004   -9999.000000       0.205900       0.179300   -9999.000000
54502     54502     hebei          116.0350       39.4750           82       184     2012      07        07        189              0.194083      26.478119       6.793461       0.302787   -9999.000000   -9999.000000       0.186900       0.911000
54502     54502     hebei          116.0350       39.4750           82       184     2012      07        08        190              0.210417      28.298126      19.281416       0.309138   -9999.000000   -9999.000000   -9999.000000       0.805000
54502     54502     hebei          116.0350       39.4750           82       184     2012      07        09        191              0.265958      28.253754       1.546567       0.324240       0.255000   -9999.000000       0.152800       1.000000
54502     54502     hebei          116.0350       39.4750           82       184     2012      07        10        192              0.241750      27.394470       2.661305       0.335169       0.217500   -9999.000000       0.223600       0.976000
54502     54502     hebei          116.0350       39.4750           82       184     2012      07        11        193              0.224625      28.868225       0.152547       0.320334       0.168000   -9999.000000       0.186500   -9999.000000
54502     54502     hebei          116.0350       39.4750           82       184     2012      07        12        194              0.205958      29.247711       1.197023       0.309533       0.185000   -9999.000000       0.196000       0.815000
54502     54502     hebei          116.0350       39.4750           82       184     2012      07        13        195              0.192042      29.014008       0.000000       0.302870       0.230000   -9999.000000       0.212900       0.842000
54502     54502     hebei          116.0350       39.4750           82       184     2012      07        14        196              0.183125      28.071442       0.000000       0.295363       0.247000   -9999.000000       0.190200       0.628000
54502     54502     hebei          116.0350       39.4750           82       184     2012      07        15        197              0.176833      28.148621       0.000000       0.287227       0.174000   -9999.000000       0.115600       0.672000
54502     54502     hebei          116.0350       39.4750           82       184     2012      07        16        198              0.170250      28.873932       0.000000       0.279311       0.177500   -9999.000000       0.228100   -9999.000000
54502     54502     hebei          116.0350       39.4750           82       184     2012      07        17        199              0.161792      29.055176       0.000000       0.271802       0.156000   -9999.000000       0.185300       0.620000
54502     54502     hebei          116.0350       39.4750           82       184     2012      07        18        200              0.155083      29.120422       0.000000       0.264917       0.175000   -9999.000000       0.230200       0.761000
54502     54502     hebei          116.0350       39.4750           82       184     2012      07        19        201              0.151750      28.844513       1.732445       0.260999       0.234000   -9999.000000       0.231900       0.518000
54502     54502     hebei          116.0350       39.4750           82       184     2012      07        20        202              0.148652      29.243530       0.000000       0.257227       0.173500   -9999.000000       0.159500       0.589000
54502     54502     hebei          116.0350       39.4750           82       184     2012      07        21        203              0.244375      30.178406     315.473846       0.251506       0.388000   -9999.000000       0.257400       0.960000
54502     54502     hebei          116.0350       39.4750           82       184     2012      07        22        204              0.291042      26.677307       0.515278       0.497034       0.226000   -9999.000000       0.258100       1.000000
54502     54502     hebei          116.0350       39.4750           82       184     2012      07        23        205              0.271250      28.342499       0.245229       0.384877       0.249000   -9999.000000       0.130100       0.903000
54502     54502     hebei          116.0350       39.4750           82       184     2012      07        24        206              0.261833      28.487244       0.000000       0.337403       0.368000   -9999.000000       0.150000       0.884000
54502     54502     hebei          116.0350       39.4750           82       184     2012      07        25        207              0.254250      29.124939       0.673946       0.328624       0.401000   -9999.000000   -9999.000000       0.864000
54502     54502     hebei          116.0350       39.4750           82       184     2012      07        26        208              0.250167      28.479034       0.354728       0.326169       0.363000   -9999.000000       0.109500       0.798000
54502     54502     hebei          116.0350       39.4750           82       184     2012      07        27        209              0.277125      28.016327      31.341068       0.322902       0.266000   -9999.000000       0.154500       1.000000
54502     54502     hebei          116.0350       39.4750           82       184     2012      07        28        210              0.281583      28.118225       1.650419       0.356001       0.234000   -9999.000000       0.131800       1.000000
54502     54502     hebei          116.0350       39.4750           82       184     2012      07        29        211              0.261375      29.408112       0.000000       0.343813       0.274500   -9999.000000       0.123400       0.870000
54502     54502     hebei          116.0350       39.4750           82       184     2012      07        30        212              0.271542      30.245697      31.541365       0.329031   -9999.000000   -9999.000000       0.212200   -9999.000000
54502     54502     hebei          116.0350       39.4750           82       184     2012      07        31        213              0.315750      26.977783      29.740021       0.354939       0.488000   -9999.000000       0.241100       1.000000
54502     54502     hebei          116.0350       39.4750           82       184     2012      08        01        214              0.284917      23.470917      15.084607       0.374737       0.396000   -9999.000000       0.156600       1.000000
54502     54502     hebei          116.0350       39.4750           82       184     2012      08        02        215              0.240083      24.011169       0.000000       0.362411       0.255000   -9999.000000       0.219800       1.000000
54502     54502     hebei          116.0350       39.4750           82       184     2012      08        03        216              0.228958      27.297455       0.127733       0.342222       0.285000   -9999.000000       0.173500       0.873000
54502     54502     hebei          116.0350       39.4750           82       184     2012      08        04        217              0.216958      27.551025       0.180988       0.336582       0.338000   -9999.000000       0.205500   -9999.000000
54502     54502     hebei          116.0350       39.4750           82       184     2012      08        05        218              0.203333      29.385193       0.000000       0.330289       0.344000   -9999.000000       0.208300       0.877000
54502     54502     hebei          116.0350       39.4750           82       184     2012      08        06        219              0.192083      28.674042       0.268401       0.326318       0.291500   -9999.000000       0.142400       0.816000
54502     54502     hebei          116.0350       39.4750           82       184     2012      08        07        220              0.181667      29.223602       0.158639       0.321841       0.226000   -9999.000000   -9999.000000       0.688000
54502     54502     hebei          116.0350       39.4750           82       184     2012      08        08        221              0.175250      29.477081       0.109928       0.319963       0.254000   -9999.000000       0.224300       0.738000
54502     54502     hebei          116.0350       39.4750           82       184     2012      08        09        222              0.166792      29.173676       0.000000       0.318678       0.328000   -9999.000000       0.192600   -9999.000000
54502     54502     hebei          116.0350       39.4750           82       184     2012      08        10        223              0.161375      29.548523       0.000000       0.313977       0.318000   -9999.000000       0.210700       0.685000
54502     54502     hebei          116.0350       39.4750           82       184     2012      08        11        224              0.185125      29.216644      37.652172       0.311170   -9999.000000   -9999.000000   -9999.000000       0.994000
54502     54502     hebei          116.0350       39.4750           82       184     2012      08        12        225              0.241208      25.842407       2.169771       0.346291       0.400000   -9999.000000       0.155600       1.000000
54502     54502     hebei          116.0350       39.4750           82       184     2012      08        13        226              0.218391      27.059387       0.000000       0.350340       0.302000   -9999.000000       0.204100       0.798000
54502     54502     hebei          116.0350       39.4750           82       184     2012      08        14        227              0.209625      26.804260       0.827563       0.333195       0.376000   -9999.000000       0.176000   -9999.000000
54502     54502     hebei          116.0350       39.4750           82       184     2012      08        15        228              0.200542      24.334930       0.000000       0.329410       0.472000   -9999.000000       0.169800       0.757000
54502     54502     hebei          116.0350       39.4750           82       184     2012      08        16        229              0.188958      26.717438       0.000000       0.323515       0.299000   -9999.000000       0.185800       0.761000
54502     54502     hebei          116.0350       39.4750           82       184     2012      08        17        230              0.180583      27.222290       0.498273       0.318875       0.309500   -9999.000000       0.158900       0.690000
54502     54502     hebei          116.0350       39.4750           82       184     2012      08        18        231              0.179750      26.917267       0.892864       0.318604   -9999.000000   -9999.000000       0.126400       0.734000
54502     54502     hebei          116.0350       39.4750           82       184     2012      08        19        232              0.178417      26.142151       0.000000       0.321128       0.299000   -9999.000000       0.201600       0.678000
54502     54502     hebei          116.0350       39.4750           82       184     2012      08        20        233              0.243333      27.436035       9.358638       0.315413       0.346000   -9999.000000       0.139000       1.000000
54502     54502     hebei          116.0350       39.4750           82       184     2012      08        21        234              0.252417      27.047058       2.041301       0.333246       0.490000   -9999.000000       0.179500       0.682000
54502     54502     hebei          116.0350       39.4750           82       184     2012      08        22        235              0.229250      25.113983       0.000000       0.321689       0.391500   -9999.000000   -9999.000000   -9999.000000
54502     54502     hebei          116.0350       39.4750           82       184     2012      08        23        236              0.213875      24.338531       0.000000       0.315411       0.355000   -9999.000000       0.103300       0.583000
54502     54502     hebei          116.0350       39.4750           82       184     2012      08        24        237              0.201708      25.052277       0.000000       0.312164       0.366000   -9999.000000       0.181500       0.567000
54502     54502     hebei          116.0350       39.4750           82       184     2012      08        25        238              0.000000      24.893341       0.000000       0.308594       0.444500   -9999.000000       0.128200       0.579000
54502     54502     hebei          116.0350       39.4750           82       184     2012      08        26        239              0.186542      25.596313       2.273498       0.306247       0.500000   -9999.000000       0.149500       0.668000
54502     54502     hebei          116.0350       39.4750           82       184     2012      08        27        240              0.181708      26.513397       0.686427       0.306389       0.387500   -9999.000000       0.149600       0.679000
54502     54502     hebei          116.0350       39.4750           82       184     2012      08        28        241              0.177708      26.766357       0.000000       0.311247       0.407000   -9999.000000       0.136600   -9999.000000
54502     54502     hebei          116.0350       39.4750           82       184     2012      08        29        242              0.171500      27.869904       0.000000       0.304911       0.351000   -9999.000000       0.095200       0.676000
54502     54502     hebei          116.0350       39.4750           82       184     2012      08        30        243              0.164833      28.332703       0.000000       0.300735       0.372000   -9999.000000       0.151500       0.627000
54502     54502     hebei          116.0350       39.4750           82       184     2012      08        31        244              0.162167      28.672333       0.320324       0.297856       0.495000   -9999.000000       0.119100       0.641000
54502     54502     hebei          116.0350       39.4750           82       184     2012      09        01        245              0.188458      28.338501      71.246475       0.297146   -9999.000000   -9999.000000       0.162900       1.000000
54502     54502     hebei          116.0350       39.4750           82       184     2012      09        02        246              0.279000      26.365692       4.917399       0.368700       0.310500   -9999.000000       0.162500   -9999.000000
54502     54502     hebei          116.0350       39.4750           82       184     2012      09        03        247              0.246417      24.079529       0.000000       0.357220       0.244000   -9999.000000       0.139500       0.900000
54502     54502     hebei          116.0350       39.4750           82       184     2012      09        04        248              0.227125      23.030243       0.000000       0.335474       0.228000   -9999.000000       0.142800       0.771000
54502     54502     hebei          116.0350       39.4750           82       184     2012      09        05        249              0.212875      22.944458       0.000000       0.327972       0.326000   -9999.000000       0.181200       0.792000
54502     54502     hebei          116.0350       39.4750           82       184     2012      09        06        250              0.237750      23.039642      20.955570       0.323357       0.420000   -9999.000000       0.141300       1.000000
54502     54502     hebei          116.0350       39.4750           82       184     2012      09        07        251              0.260583      22.034027       0.000000       0.350520       0.268500   -9999.000000       0.194000   -9999.000000
54502     54502     hebei          116.0350       39.4750           82       184     2012      09        08        252              0.244083      23.510529       0.000000       0.340040       0.299500   -9999.000000   -9999.000000       0.827000
54502     54502     hebei          116.0350       39.4750           82       184     2012      09        09        253              0.232750      24.049927       0.000000       0.330601       0.247000   -9999.000000       0.103400       0.841000
54502     54502     hebei          116.0350       39.4750           82       184     2012      09        10        254              0.224833      24.792267       0.433875       0.325953       0.276000   -9999.000000       0.228100       0.671000
54502     54502     hebei          116.0350       39.4750           82       184     2012      09        11        255              0.218042      24.878906       0.204888       0.323263       0.373000   -9999.000000       0.185900       0.723000
54502     54502     hebei          116.0350       39.4750           82       184     2012      09        12        256              0.203208      24.114929       0.000000       0.321953   -9999.000000   -9999.000000       0.186200   -9999.000000
54502     54502     hebei          116.0350       39.4750           82       184     2012      09        13        257              0.191417      21.766876       0.338594       0.318379       0.271500   -9999.000000       0.219100       0.683000
54502     54502     hebei          116.0350       39.4750           82       184     2012      09        14        258              0.182542      21.502991       0.000000       0.317689       0.216000   -9999.000000       0.215300       0.684000
54502     54502     hebei          116.0350       39.4750           82       184     2012      09        15        259              0.175375      21.492554       0.000000       0.315747   -9999.000000   -9999.000000       0.149200       0.664000
54502     54502     hebei          116.0350       39.4750           82       184     2012      09        16        260              0.168750      21.612946       0.000000       0.314053   -9999.000000   -9999.000000       0.212000       0.594000
54502     54502     hebei          116.0350       39.4750           82       184     2012      09        17        261              0.164042      21.636993       0.000000       0.312436       0.333000   -9999.000000       0.126600       0.675000
54502     54502     hebei          116.0350       39.4750           82       184     2012      09        18        262              0.159542      22.084503       0.000000       0.311138       0.246500   -9999.000000       0.165500       0.632000
54502     54502     hebei          116.0350       39.4750           82       184     2012      09        19        263              0.154250      22.447510       0.000000       0.309762       0.223000   -9999.000000       0.164200       0.735000
54502     54502     hebei          116.0350       39.4750           82       184     2012      09        20        264              0.152125      22.505219       0.000000       0.308797       0.231000   -9999.000000       0.131300       0.688000
54502     54502     hebei          116.0350       39.4750           82       184     2012      09        21        265              0.149917      22.940430       0.000000       0.307684   -9999.000000   -9999.000000       0.126600       0.547000
54502     54502     hebei          116.0350       39.4750           82       184     2012      09        22        266              0.148708      22.238861       0.000000       0.308153       0.309000   -9999.000000       0.179600       0.590000
54502     54502     hebei          116.0350       39.4750           82       184     2012      09        23        267              0.145875      22.652710       0.000000       0.306828       0.197000   -9999.000000       0.144800       0.608000
54502     54502     hebei          116.0350       39.4750           82       184     2012      09        24        268              0.143125      23.303436       0.725832       0.305576       0.227500   -9999.000000       0.198900       0.552000
54502     54502     hebei          116.0350       39.4750           82       184     2012      09        25        269              0.228958      22.844177      19.264097       0.306787       0.232000   -9999.000000   -9999.000000       1.000000
54502     54502     hebei          116.0350       39.4750           82       184     2012      09        26        270              0.244417      20.987488       0.000000       0.343061       0.227000   -9999.000000       0.119600   -9999.000000
54502     54502     hebei          116.0350       39.4750           82       184     2012      09        27        271              0.245000      21.472565       5.413001       0.329162   -9999.000000   -9999.000000       0.204600       0.835000
54502     54502     hebei          116.0350       39.4750           82       184     2012      09        28        272              0.218533      19.050079       0.000000       0.333553   -9999.000000   -9999.000000       0.162400       0.679000
54502     54502     hebei          116.0350       39.4750           82       184     2012      09        29        273              0.208583      18.180756       0.000000       0.322443       0.187000   -9999.000000       0.180300       0.684000
54502     54502     hebei          116.0350       39.4750           82       184     2012      09        30        274              0.195708      18.877502       0.000000       0.318317       0.181000   -9999.000000       0.205900       0.681000
54502     54502     hebei          116.0350       39.4750           82       184     2012      10        01        275              0.185125      19.045319       0.000000       0.315417       0.138000   -9999.000000       0.169000   -9999.000000
54502     54502     hebei          116.0350       39.4750           82       184     2012      10        02        276              0.179333      19.783813       0.000000       0.312963       0.192000   -9999.000000       0.098900       0.661000
54502     54502     hebei          116.0350       39.4750           82       184     2012      10        03        277              0.172250      20.380707       0.000000       0.311159       0.200000   -9999.000000       0.164700       0.634000
54502     54502     hebei          116.0350       39.4750           82       184     2012      10        04        278              0.164583      19.609589       0.185718       0.309384       0.149000   -9999.000000       0.125800       0.672000
54502     54502     hebei          116.0350       39.4750           82       184     2012      10        05        279              0.161167      18.768646       0.000000       0.309325       0.180500   -9999.000000       0.159200       0.574000
54502     54502     hebei          116.0350       39.4750           82       184     2012      10        06        280              0.157125      19.198395       0.000000       0.308014       0.158000   -9999.000000       0.183500   -9999.000000
54502     54502     hebei          116.0350       39.4750           82       184     2012      10        07        281              0.153833      19.380341       0.000000       0.307015       0.179000   -9999.000000       0.099200       0.626000
54502     54502     hebei          116.0350       39.4750           82       184     2012      10        08        282              0.152417      19.431519       1.555896       0.306485   -9999.000000   -9999.000000       0.162700       0.659000
54502     54502     hebei          116.0350       39.4750           82       184     2012      10        09        283              0.149042      19.933746       0.099233       0.308674   -9999.000000   -9999.000000       0.157500       0.762000
54502     54502     hebei          116.0350       39.4750           82       184     2012      10        10        284              0.144375      17.632843       0.000000       0.309389       0.148000   -9999.000000       0.126800       0.489000
54502     54502     hebei          116.0350       39.4750           82       184     2012      10        11        285              0.140250      16.841492       0.000000       0.306837       0.118000   -9999.000000       0.161000   -9999.000000
54502     54502     hebei          116.0350       39.4750           82       184     2012      10        12        286              0.139542      16.564972       0.000000       0.306302       0.145000   -9999.000000   -9999.000000       0.596000
54502     54502     hebei          116.0350       39.4750           82       184     2012      10        13        287              0.135583      17.582855       0.000000       0.306279   -9999.000000   -9999.000000       0.069300       0.595000
54502     54502     hebei          116.0350       39.4750           82       184     2012      10        14        288              0.132083      15.849579       0.049181       0.304802       0.172000   -9999.000000       0.155000       0.524000
54502     54502     hebei          116.0350       39.4750           82       184     2012      10        15        289              0.130750      15.133789       3.392047       0.305051       0.144000   -9999.000000       0.126300       0.448000
54502     54502     hebei          116.0350       39.4750           82       184     2012      10        16        290              0.129875      14.741180       2.693653       0.310186       0.158000   -9999.000000       0.137900       0.898000
54502     54502     hebei          116.0350       39.4750           82       184     2012      10        17        291              0.128625      13.548279       0.000000       0.322887       0.144000   -9999.000000       0.154200       0.509000
54502     54502     hebei          116.0350       39.4750           82       184     2012      10        18        292              0.128708      13.121185       0.000000       0.313890       0.149000   -9999.000000       0.115800       0.608000
54502     54502     hebei          116.0350       39.4750           82       184     2012      10        19        293              0.127542      13.883728       0.000000       0.311999   -9999.000000   -9999.000000       0.082600       0.558000
54502     54502     hebei          116.0350       39.4750           82       184     2012      10        20        294              0.128167      14.303192       0.117906       0.310825       0.151000   -9999.000000       0.161600       0.460000
54502     54502     hebei          116.0350       39.4750           82       184     2012      10        21        295              0.137833      15.228516      12.018535       0.310176   -9999.000000   -9999.000000       0.134400       0.447000
54502     54502     hebei          116.0350       39.4750           82       184     2012      10        22        296              0.159667      12.278442       0.234188       0.335856   -9999.000000   -9999.000000       0.128700       0.577000
54502     54502     hebei          116.0350       39.4750           82       184     2012      10        23        297              0.153833      13.162201       0.000000       0.325656   -9999.000000   -9999.000000   -9999.000000       0.749000
54502     54502     hebei          116.0350       39.4750           82       184     2012      10        24        298              0.148333      13.879578       0.000000       0.320179   -9999.000000   -9999.000000       0.038600       0.628000
54502     54502     hebei          116.0350       39.4750           82       184     2012      10        25        299              0.000000      14.771759       0.000000       0.317371       0.148000   -9999.000000       0.104500   -9999.000000
54502     54502     hebei          116.0350       39.4750           82       184     2012      10        26        300              0.141667      15.164215       0.744097       0.315383       0.134500   -9999.000000       0.083700       0.612000
54502     54502     hebei          116.0350       39.4750           82       184     2012      10        27        301              0.137500      15.053497       0.000000       0.316099       0.117000   -9999.000000       0.096400       0.620000
54502     54502     hebei          116.0350       39.4750           82       184     2012      10        28        302              0.000000      14.574310       0.000000       0.314420       0.107000   -9999.000000       0.116900       0.677000
54502     54502     hebei          116.0350       39.4750           82       184     2012      10        29        303              0.128958      12.911133       0.000000       0.312140   -9999.000000   -9999.000000       0.085800       0.589000
54502     54502     hebei          116.0350       39.4750           82       184     2012      10        30        304              0.125208      11.604889       0.000000       0.311369   -9999.000000   -9999.000000       0.038200   -9999.000000
54502     54502     hebei          116.0350       39.4750           82       184     2012      10        31        305              0.123458      10.078217       0.000000       0.309953       0.079000   -9999.000000       0.084100       0.468000
54502     54502     hebei          116.0350       39.4750           82       184     2012      11        01        306              0.121875       9.992401       0.030954       0.309679       0.087000   -9999.000000       0.065000       0.496000
54502     54502     hebei          116.0350       39.4750           82       184     2012      11        02        307              0.121833      10.315765       0.000000       0.309752       0.104000   -9999.000000       0.096200       0.486000
54502     54502     hebei          116.0350       39.4750           82       184     2012      11        03        308              0.200500      11.080231      50.032421       0.309724       0.145000   -9999.000000       0.114400       1.000000
54502     54502     hebei          116.0350       39.4750           82       184     2012      11        04        309              0.269875       9.008148       7.126161       0.364739   -9999.000000   -9999.000000       0.069300   -9999.000000
54502     54502     hebei          116.0350       39.4750           82       184     2012      11        05        310              0.245917       6.669067       0.164320       0.360008   -9999.000000   -9999.000000       0.050900       0.868000
54502     54502     hebei          116.0350       39.4750           82       184     2012      11        06        311              0.238000       8.150665       0.000000       0.343105       0.135000   -9999.000000       0.080000       0.788000
54502     54502     hebei          116.0350       39.4750           82       184     2012      11        07        312              0.233667       8.356750       0.445044       0.333264       0.138000   -9999.000000       0.073700       0.761000
54502     54502     hebei          116.0350       39.4750           82       184     2012      11        08        313              0.229217       8.864441       1.235450       0.328519       0.150000   -9999.000000   -9999.000000       0.685000
54502     54502     hebei          116.0350       39.4750           82       184     2012      11        09        314              0.227875       8.437195       1.342611       0.325126   -9999.000000   -9999.000000   -9999.000000   -9999.000000
54502     54502     hebei          116.0350       39.4750           82       184     2012      11        10        315              0.257625       8.912567      19.311897       0.325456   -9999.000000   -9999.000000       0.035400       1.000000
54502     54502     hebei          116.0350       39.4750           82       184     2012      11        11        316              0.244583       6.382721       0.170839       0.355907   -9999.000000   -9999.000000       0.066900       0.764000
54502     54502     hebei          116.0350       39.4750           82       184     2012      11        12        317              0.235583       5.245880       0.000000       0.336140   -9999.000000   -9999.000000       0.065400       0.740000
54502     54502     hebei          116.0350       39.4750           82       184     2012      11        13        318              0.000000       5.353485       0.000000       0.329758       0.145000   -9999.000000       0.070600       0.452000
54502     54502     hebei          116.0350       39.4750           82       184     2012      11        14        319              0.221083       4.299408       1.387825       0.323635   -9999.000000   -9999.000000       0.085900       0.602000
54502     54502     hebei          116.0350       39.4750           82       184     2012      11        15        320              0.224083       3.886261       5.291269       0.321602   -9999.000000   -9999.000000       0.075800       0.656000
54502     54502     hebei          116.0350       39.4750           82       184     2012      11        16        321              0.226542       4.543945       0.066530       0.326373   -9999.000000   -9999.000000       0.037300       0.643000
54502     54502     hebei          116.0350       39.4750           82       184     2012      11        17        322              0.000000       3.481506       0.085327       0.332975       0.115000   -9999.000000       0.069500       0.622000
54502     54502     hebei          116.0350       39.4750           82       184     2012      11        18        323              0.218833       4.654541       0.000000       0.326704   -9999.000000   -9999.000000       0.047900       0.542000
54502     54502     hebei          116.0350       39.4750           82       184     2012      11        19        324              0.214000       4.103912       0.000000       0.324789   -9999.000000   -9999.000000       0.062200       0.578000
54502     54502     hebei          116.0350       39.4750           82       184     2012      11        20        325              0.213667       4.172974       0.000000       0.322266   -9999.000000   -9999.000000       0.064200       0.504000
54502     54502     hebei          116.0350       39.4750           82       184     2012      11        21        326              0.213250       4.686768       0.320227       0.322394   -9999.000000   -9999.000000       0.027800       0.631000
54502     54502     hebei          116.0350       39.4750           82       184     2012      11        22        327              0.210792       4.921509       4.542817       0.322141   -9999.000000   -9999.000000       0.029900       0.551000
54502     54502     hebei          116.0350       39.4750           82       184     2012      11        23        328              0.202875       3.352051       0.000000       0.312648   -9999.000000   -9999.000000       0.050700   -9999.000000
54502     54502     hebei          116.0350       39.4750           82       184     2012      11        24        329              0.199458       2.244537       0.000000       0.296540   -9999.000000   -9999.000000       0.040500       0.501000
54502     54502     hebei          116.0350       39.4750           82       184     2012      11        25        330              0.200417       2.384491       0.000000       0.304551   -9999.000000   -9999.000000       0.057700       0.350000
54502     54502     hebei          116.0350       39.4750           82       184     2012      11        26        331              0.197917       2.456970       0.000000       0.306430   -9999.000000   -9999.000000   -9999.000000       0.594000
54502     54502     hebei          116.0350       39.4750           82       184     2012      11        27        332              0.195167       2.476074       0.000000       0.297532   -9999.000000   -9999.000000       0.010000       0.546000
54502     54502     hebei          116.0350       39.4750           82       184     2012      11        28        333              0.194167       1.945862       0.000000       0.300252   -9999.000000   -9999.000000       0.045700   -9999.000000
54502     54502     hebei          116.0350       39.4750           82       184     2012      11        29        334              0.186333       2.048523       0.000000       0.285473   -9999.000000   -9999.000000       0.035800       0.449000
54502     54502     hebei          116.0350       39.4750           82       184     2012      11        30        335              0.176000       1.053864       0.000000       0.261746   -9999.000000   -9999.000000       0.033000       0.255000
54502     54502     hebei          116.0350       39.4750           82       184     2012      12        01        336              0.161792      -0.253052       0.308035       0.219303   -9999.000000   -9999.000000       0.048900       0.286000
54502     54502     hebei          116.0350       39.4750           82       184     2012      12        02        337              0.151250      -1.452332       0.153511       0.175048   -9999.000000   -9999.000000       0.047800       0.275000
54502     54502     hebei          116.0350       39.4750           82       184     2012      12        03        338              0.143000      -1.586243       0.680411       0.164562   -9999.000000   -9999.000000       0.012100   -9999.000000
54502     54502     hebei          116.0350       39.4750           82       184     2012      12        04        339              0.129833      -0.508453       0.000000       0.202344   -9999.000000   -9999.000000       0.044500       0.434000
54502     54502     hebei          116.0350       39.4750           82       184     2012      12        05        340              0.116250      -0.394531       0.309195       0.197531   -9999.000000   -9999.000000       0.010000       0.220000
54502     54502     hebei          116.0350       39.4750           82       184     2012      12        06        341              0.094833      -2.295593       0.078724       0.169029   -9999.000000   -9999.000000       0.046600       0.221000
54502     54502     hebei          116.0350       39.4750           82       184     2012      12        07        342              0.086750      -2.805756       0.000000       0.156189   -9999.000000   -9999.000000   -9999.000000       0.202000
54502     54502     hebei          116.0350       39.4750           82       184     2012      12        08        343              0.073667      -2.628143       0.000000       0.163096   -9999.000000   -9999.000000       0.012200   -9999.000000
54502     54502     hebei          116.0350       39.4750           82       184     2012      12        09        344              0.069913      -4.529236       0.000000       0.143925   -9999.000000   -9999.000000       0.047200       0.260000
54502     54502     hebei          116.0350       39.4750           82       184     2012      12        10        345              0.073375      -2.567749       0.000000       0.161942   -9999.000000   -9999.000000       0.011000       0.267000
54502     54502     hebei          116.0350       39.4750           82       184     2012      12        11        346              0.075917      -2.649475       0.000000       0.162637   -9999.000000   -9999.000000       0.023100       0.337000
54502     54502     hebei          116.0350       39.4750           82       184     2012      12        12        347              0.080583      -2.223785       0.079030       0.162359   -9999.000000   -9999.000000       0.038300       0.065000
54502     54502     hebei          116.0350       39.4750           82       184     2012      12        13        348              0.082792      -2.372803       8.406405       0.156299   -9999.000000   -9999.000000       0.038200       0.116000
54502     54502     hebei          116.0350       39.4750           82       184     2012      12        14        349              0.092000      -1.273621       2.145359       0.165270   -9999.000000   -9999.000000       0.017000       0.295000
54502     54502     hebei          116.0350       39.4750           82       184     2012      12        15        350              0.000000      -0.776825       0.000000       0.164311   -9999.000000   -9999.000000       0.039600       0.442000
54502     54502     hebei          116.0350       39.4750           82       184     2012      12        16        351              0.114417      -0.869324       0.554065       0.174953   -9999.000000   -9999.000000       0.030800       0.489000
54502     54502     hebei          116.0350       39.4750           82       184     2012      12        17        352              0.109167      -1.292114       0.000000       0.173382   -9999.000000   -9999.000000       0.028600       0.177000
54502     54502     hebei          116.0350       39.4750           82       184     2012      12        18        353              0.081667      -2.366150       0.000000       0.172743   -9999.000000   -9999.000000       0.042700       0.282000
54502     54502     hebei          116.0350       39.4750           82       184     2012      12        19        354              0.080333      -3.248779       0.000000       0.151287   -9999.000000   -9999.000000       0.023900       0.123000
54502     54502     hebei          116.0350       39.4750           82       184     2012      12        20        355              0.000000      -3.389954       1.479993       0.149668   -9999.000000   -9999.000000       0.014100       0.313000
54502     54502     hebei          116.0350       39.4750           82       184     2012      12        21        356              0.081833      -2.568726       0.000000       0.151347   -9999.000000   -9999.000000       0.035800       0.212000
54502     54502     hebei          116.0350       39.4750           82       184     2012      12        22        357              0.076208      -3.180420       0.033492       0.157593   -9999.000000   -9999.000000       0.010000   -9999.000000
54502     54502     hebei          116.0350       39.4750           82       184     2012      12        23        358              0.068333      -5.412109       0.000000       0.141536   -9999.000000   -9999.000000   -9999.000000       0.279000
54502     54502     hebei          116.0350       39.4750           82       184     2012      12        24        359              0.066167      -8.014313       0.000000       0.131418   -9999.000000   -9999.000000   -9999.000000       0.137000
54502     54502     hebei          116.0350       39.4750           82       184     2012      12        25        360              0.065917      -7.212585       0.000000       0.131810   -9999.000000   -9999.000000       0.010000       0.034000
54502     54502     hebei          116.0350       39.4750           82       184     2012      12        26        361              0.000000      -7.522003       0.000000       0.131575   -9999.000000   -9999.000000       0.037200       0.185000
54502     54502     hebei          116.0350       39.4750           82       184     2012      12        27        362              0.065000      -7.022827       0.000000       0.131565   -9999.000000   -9999.000000       0.015500   -9999.000000
54502     54502     hebei          116.0350       39.4750           82       184     2012      12        28        363              0.066000      -6.489471       5.838850       0.131801   -9999.000000   -9999.000000       0.020300       0.243000
54502     54502     hebei          116.0350       39.4750           82       184     2012      12        29        364              0.000000      -4.144897       0.000000       0.132975   -9999.000000   -9999.000000   -9999.000000   -9999.000000
54502     54502     hebei          116.0350       39.4750           82       184     2012      12        30        365              0.000000      -3.546906       0.000000       0.133870   -9999.000000   -9999.000000       0.035300       0.204000
54502     54502     hebei          116.0350       39.4750           82       184     2012      12        31        366              0.066800      -4.056061       0.089196       0.135288   -9999.000000   -9999.000000       0.010000   -9999.000000
