# Supplementary material for: Research on Fusing Multisatellite Soil Moisture Data Based on Bayesian Model Averaging
Source: Hindawi journal article supplement (doi:10.1155/2018/9310838), 2018-06-25
Supplement: f1 [file 9310838.f1.zip › 2012_sm00-10cm_daily_ZDB_ZHY_54596_366days_allin.txt]

54596     54596     beijing        116.1383       39.6772           81       185     2012      01        01        001              0.000000   -9999.000000       0.000000   -9999.000000   -9999.000000   -9999.000000       0.010000   -9999.000000
54596     54596     beijing        116.1383       39.6772           81       185     2012      01        02        002              0.000000      -3.371124       0.000000       0.166555   -9999.000000   -9999.000000       0.010000       0.079000
54596     54596     beijing        116.1383       39.6772           81       185     2012      01        03        003              0.000000      -2.999878       0.000000       0.173057   -9999.000000   -9999.000000       0.027600       0.261000
54596     54596     beijing        116.1383       39.6772           81       185     2012      01        04        004              0.000000      -4.287170       0.000000       0.158514   -9999.000000   -9999.000000       0.031700       0.117000
54596     54596     beijing        116.1383       39.6772           81       185     2012      01        05        005              0.000000      -3.930969       0.000000       0.166354   -9999.000000   -9999.000000       0.010000       0.034000
54596     54596     beijing        116.1383       39.6772           81       185     2012      01        06        006              0.000000      -3.493286       0.000000       0.171460   -9999.000000   -9999.000000       0.037900       0.141000
54596     54596     beijing        116.1383       39.6772           81       185     2012      01        07        007              0.000000      -4.021362       0.000000       0.159977   -9999.000000   -9999.000000       0.010000       0.537000
54596     54596     beijing        116.1383       39.6772           81       185     2012      01        08        008              0.000000      -3.921509       0.000000       0.158944   -9999.000000   -9999.000000       0.027300       0.551000
54596     54596     beijing        116.1383       39.6772           81       185     2012      01        09        009              0.000000      -3.190247       0.000000       0.172284   -9999.000000   -9999.000000       0.035900   -9999.000000
54596     54596     beijing        116.1383       39.6772           81       185     2012      01        10        010              0.000000      -2.591278       0.000000       0.179828   -9999.000000   -9999.000000       0.010000       0.460000
54596     54596     beijing        116.1383       39.6772           81       185     2012      01        11        011              0.000000      -2.435669       0.000000       0.185157   -9999.000000   -9999.000000       0.010000       0.354000
54596     54596     beijing        116.1383       39.6772           81       185     2012      01        12        012              0.000000      -4.193756       1.033176       0.165530   -9999.000000   -9999.000000       0.041700       0.649000
54596     54596     beijing        116.1383       39.6772           81       185     2012      01        13        013              0.000000      -2.278229       0.000000       0.184532   -9999.000000   -9999.000000       0.010000       0.409000
54596     54596     beijing        116.1383       39.6772           81       185     2012      01        14        014              0.000000      -1.416168       0.000000       0.202218   -9999.000000   -9999.000000       0.033500   -9999.000000
54596     54596     beijing        116.1383       39.6772           81       185     2012      01        15        015              0.000000      -1.033478       0.000000       0.211098   -9999.000000   -9999.000000   -9999.000000       0.481000
54596     54596     beijing        116.1383       39.6772           81       185     2012      01        16        016              0.000000      -1.864990       0.000000       0.193817   -9999.000000   -9999.000000       0.010000       0.276000
54596     54596     beijing        116.1383       39.6772           81       185     2012      01        17        017              0.000000      -2.310089       0.000000       0.179922   -9999.000000   -9999.000000       0.037100       0.364000
54596     54596     beijing        116.1383       39.6772           81       185     2012      01        18        018              0.000000      -2.096252       0.000000       0.187144   -9999.000000   -9999.000000       0.010000       0.276000
54596     54596     beijing        116.1383       39.6772           81       185     2012      01        19        019              0.000000      -2.271027       0.000000       0.181159   -9999.000000   -9999.000000       0.011500   -9999.000000
54596     54596     beijing        116.1383       39.6772           81       185     2012      01        20        020              0.000000      -1.530548       0.000000       0.193775   -9999.000000   -9999.000000       0.028100       0.431000
54596     54596     beijing        116.1383       39.6772           81       185     2012      01        21        021              0.000000      -3.694244       0.000000       0.170852   -9999.000000   -9999.000000       0.035200       0.260000
54596     54596     beijing        116.1383       39.6772           81       185     2012      01        22        022              0.000000      -5.572723       0.831199       0.152407   -9999.000000   -9999.000000       0.010000       0.599000
54596     54596     beijing        116.1383       39.6772           81       185     2012      01        23        023              0.000000      -5.923492       0.000000       0.150019   -9999.000000   -9999.000000       0.030400       0.275000
54596     54596     beijing        116.1383       39.6772           81       185     2012      01        24        024              0.000000      -4.580688       0.000000       0.161690   -9999.000000   -9999.000000   -9999.000000   -9999.000000
54596     54596     beijing        116.1383       39.6772           81       185     2012      01        25        025              0.000000      -4.638458       0.000000       0.162445   -9999.000000   -9999.000000       0.030100       0.436000
54596     54596     beijing        116.1383       39.6772           81       185     2012      01        26        026              0.000000      -3.300262       0.000000       0.175166   -9999.000000   -9999.000000       0.029500       0.403000
54596     54596     beijing        116.1383       39.6772           81       185     2012      01        27        027              0.000000      -1.921112       0.000000       0.195801   -9999.000000   -9999.000000       0.010000       0.428000
54596     54596     beijing        116.1383       39.6772           81       185     2012      01        28        028              0.000000      -2.281433       0.000000       0.186194   -9999.000000   -9999.000000       0.010000       0.301000
54596     54596     beijing        116.1383       39.6772           81       185     2012      01        29        029              0.000000      -3.446655       0.000000       0.173801   -9999.000000   -9999.000000       0.032800       0.058000
54596     54596     beijing        116.1383       39.6772           81       185     2012      01        30        030              0.000000      -3.636078       0.000000       0.172550   -9999.000000   -9999.000000       0.010000       0.320000
54596     54596     beijing        116.1383       39.6772           81       185     2012      01        31        031              0.000000      -4.074738       0.000000       0.161541   -9999.000000   -9999.000000       0.024000       0.257000
54596     54596     beijing        116.1383       39.6772           81       185     2012      02        01        032              0.000000      -3.427002       0.100256       0.176844   -9999.000000   -9999.000000   -9999.000000       0.219000
54596     54596     beijing        116.1383       39.6772           81       185     2012      02        02        033              0.000000      -5.055725       0.077515       0.156554   -9999.000000   -9999.000000       0.010000       0.100000
54596     54596     beijing        116.1383       39.6772           81       185     2012      02        03        034              0.000000      -4.871948       0.000000       0.162910   -9999.000000   -9999.000000       0.029200       0.289000
54596     54596     beijing        116.1383       39.6772           81       185     2012      02        04        035              0.000000      -2.326172       0.000000       0.187095   -9999.000000   -9999.000000       0.010000       0.160000
54596     54596     beijing        116.1383       39.6772           81       185     2012      02        05        036              0.000000      -2.181580       0.000000       0.188096   -9999.000000   -9999.000000       0.010000       0.487000
54596     54596     beijing        116.1383       39.6772           81       185     2012      02        06        037              0.000000      -0.705139       1.953864       0.211880   -9999.000000   -9999.000000       0.024900       0.242000
54596     54596     beijing        116.1383       39.6772           81       185     2012      02        07        038              0.000000      -4.553314       0.000000       0.167380   -9999.000000   -9999.000000       0.029400   -9999.000000
54596     54596     beijing        116.1383       39.6772           81       185     2012      02        08        039              0.000000      -4.318542       0.000000       0.162059   -9999.000000   -9999.000000       0.010000       0.301000
54596     54596     beijing        116.1383       39.6772           81       185     2012      02        09        040              0.000000      -1.954529       0.000000       0.190509   -9999.000000   -9999.000000       0.029800       0.301000
54596     54596     beijing        116.1383       39.6772           81       185     2012      02        10        041              0.000000      -1.505127       0.000000       0.198220   -9999.000000   -9999.000000       0.010000       0.528000
54596     54596     beijing        116.1383       39.6772           81       185     2012      02        11        042              0.000000      -0.761475       0.000000       0.218150   -9999.000000   -9999.000000       0.027500       0.757000
54596     54596     beijing        116.1383       39.6772           81       185     2012      02        12        043              0.000000      -0.139618       0.000000       0.223737   -9999.000000   -9999.000000       0.027100   -9999.000000
54596     54596     beijing        116.1383       39.6772           81       185     2012      02        13        044              0.000000      -1.006744       0.000000       0.207822   -9999.000000   -9999.000000   -9999.000000       0.355000
54596     54596     beijing        116.1383       39.6772           81       185     2012      02        14        045              0.000000       0.526245       0.000000       0.234232   -9999.000000   -9999.000000       0.010000       0.430000
54596     54596     beijing        116.1383       39.6772           81       185     2012      02        15        046              0.000000      -0.089203       0.000000       0.230271   -9999.000000   -9999.000000       0.034600       0.074000
54596     54596     beijing        116.1383       39.6772           81       185     2012      02        16        047              0.000000      -0.004517       0.000000       0.225335   -9999.000000   -9999.000000       0.010000       0.392000
54596     54596     beijing        116.1383       39.6772           81       185     2012      02        17        048              0.000000      -0.587463       0.000000       0.219048   -9999.000000   -9999.000000       0.027400   -9999.000000
54596     54596     beijing        116.1383       39.6772           81       185     2012      02        18        049              0.000000      -1.643280       0.000000       0.195833   -9999.000000   -9999.000000   -9999.000000       0.300000
54596     54596     beijing        116.1383       39.6772           81       185     2012      02        19        050              0.000000      -0.447754       0.000000       0.218714       0.087000   -9999.000000       0.010000       0.274000
54596     54596     beijing        116.1383       39.6772           81       185     2012      02        20        051              0.000000       0.640198       0.000000       0.234888       0.088000   -9999.000000       0.030500       0.507000
54596     54596     beijing        116.1383       39.6772           81       185     2012      02        21        052              0.000000       1.451508       0.000000       0.250898   -9999.000000   -9999.000000   -9999.000000       0.084000
54596     54596     beijing        116.1383       39.6772           81       185     2012      02        22        053              0.000000       1.259583       0.026426       0.248346   -9999.000000   -9999.000000       0.014200   -9999.000000
54596     54596     beijing        116.1383       39.6772           81       185     2012      02        23        054              0.000000       1.781281       0.000000       0.266066   -9999.000000   -9999.000000       0.027100       0.662000
54596     54596     beijing        116.1383       39.6772           81       185     2012      02        24        055              0.000000       2.122253       0.000000       0.262225   -9999.000000   -9999.000000       0.031900       0.167000
54596     54596     beijing        116.1383       39.6772           81       185     2012      02        25        056              0.000000       1.010742       0.000000       0.252764       0.084000   -9999.000000       0.010000       0.328000
54596     54596     beijing        116.1383       39.6772           81       185     2012      02        26        057              0.000000       1.040192       0.000000       0.248903       0.093000   -9999.000000       0.029300       0.102000
54596     54596     beijing        116.1383       39.6772           81       185     2012      02        27        058              0.000000       1.812286       0.000000       0.256566   -9999.000000   -9999.000000   -9999.000000       0.097000
54596     54596     beijing        116.1383       39.6772           81       185     2012      02        28        059              0.000000       1.822113       0.000000       0.258256   -9999.000000   -9999.000000       0.026400       0.153000
54596     54596     beijing        116.1383       39.6772           81       185     2012      02        29        060              0.000000   -9999.000000       0.000000   -9999.000000       0.089000   -9999.000000   -9999.000000   -9999.000000
54596     54596     beijing        116.1383       39.6772           81       185     2012      03        01        061              0.000000       2.609772       0.447666       0.273692   -9999.000000   -9999.000000       0.010000       0.616000
54596     54596     beijing        116.1383       39.6772           81       185     2012      03        02        062              0.000000       1.772491       0.074075       0.283158   -9999.000000   -9999.000000       0.029600       0.269000
54596     54596     beijing        116.1383       39.6772           81       185     2012      03        03        063              0.000000       1.742096       0.000000       0.278365   -9999.000000   -9999.000000       0.029600       0.202000
54596     54596     beijing        116.1383       39.6772           81       185     2012      03        04        064              0.000000       1.769318       0.000000       0.270936   -9999.000000   -9999.000000       0.010000       0.434000
54596     54596     beijing        116.1383       39.6772           81       185     2012      03        05        065              0.000000       2.206512       0.000000       0.271095   -9999.000000   -9999.000000       0.030500       0.402000
54596     54596     beijing        116.1383       39.6772           81       185     2012      03        06        066              0.000000       1.984894       0.000000       0.281121       0.096000   -9999.000000   -9999.000000       0.326000
54596     54596     beijing        116.1383       39.6772           81       185     2012      03        07        067              0.000000       4.131744       0.153816       0.297349       0.096000   -9999.000000       0.010000   -9999.000000
54596     54596     beijing        116.1383       39.6772           81       185     2012      03        08        068              0.000000       4.559662       0.000000       0.290263   -9999.000000   -9999.000000       0.034400       0.197000
54596     54596     beijing        116.1383       39.6772           81       185     2012      03        09        069              0.000000       1.657379       0.000000       0.258250   -9999.000000   -9999.000000       0.010000       0.299000
54596     54596     beijing        116.1383       39.6772           81       185     2012      03        10        070              0.000000       2.644470       0.000000       0.274282       0.074000   -9999.000000       0.011800       0.555000
54596     54596     beijing        116.1383       39.6772           81       185     2012      03        11        071              0.000000       2.455811       0.000000       0.258725       0.091000   -9999.000000       0.031600       0.394000
54596     54596     beijing        116.1383       39.6772           81       185     2012      03        12        072              0.000000       2.133514       0.000000       0.257343       0.085000   -9999.000000       0.023800   -9999.000000
54596     54596     beijing        116.1383       39.6772           81       185     2012      03        13        073              0.000000       3.940247       0.000000       0.286440       0.083000   -9999.000000       0.010000       0.266000
54596     54596     beijing        116.1383       39.6772           81       185     2012      03        14        074              0.000000       6.502319       0.000000       0.310025   -9999.000000   -9999.000000       0.038900       0.310000
54596     54596     beijing        116.1383       39.6772           81       185     2012      03        15        075              0.000000       6.745331       0.000000       0.303366   -9999.000000   -9999.000000       0.010000       0.710000
54596     54596     beijing        116.1383       39.6772           81       185     2012      03        16        076              0.000000       6.246735       0.000000       0.312402       0.091000   -9999.000000       0.036700       0.490000
54596     54596     beijing        116.1383       39.6772           81       185     2012      03        17        077              0.000000       8.814789       9.660831       0.314262       0.080000   -9999.000000       0.052900   -9999.000000
54596     54596     beijing        116.1383       39.6772           81       185     2012      03        18        078              0.000000       5.250183       0.376169       0.324403   -9999.000000   -9999.000000       0.010000       1.000000
54596     54596     beijing        116.1383       39.6772           81       185     2012      03        19        079              0.000000       3.324738       0.000000       0.331630   -9999.000000   -9999.000000       0.041700       0.578000
54596     54596     beijing        116.1383       39.6772           81       185     2012      03        20        080              0.000000       3.871979       0.000000       0.320541   -9999.000000   -9999.000000       0.011800       0.920000
54596     54596     beijing        116.1383       39.6772           81       185     2012      03        21        081              0.000000       7.282867       0.486865       0.324757       0.088000   -9999.000000       0.022700       0.515000
54596     54596     beijing        116.1383       39.6772           81       185     2012      03        22        082              0.000000       8.429626       0.101510       0.323999       0.097000   -9999.000000       0.042300   -9999.000000
54596     54596     beijing        116.1383       39.6772           81       185     2012      03        23        083              0.000000       7.322937       0.000000       0.322731       0.086000   -9999.000000   -9999.000000       0.556000
54596     54596     beijing        116.1383       39.6772           81       185     2012      03        24        084              0.000000       8.196747       0.000000       0.319429       0.063000   -9999.000000   -9999.000000       0.573000
54596     54596     beijing        116.1383       39.6772           81       185     2012      03        25        085              0.000000       9.642792       0.000000       0.316323   -9999.000000   -9999.000000       0.039700       0.520000
54596     54596     beijing        116.1383       39.6772           81       185     2012      03        26        086              0.000000      10.127197       0.000000       0.314667       0.066000   -9999.000000       0.023000   -9999.000000
54596     54596     beijing        116.1383       39.6772           81       185     2012      03        27        087              0.000000      12.232117       0.000000       0.312859       0.089000   -9999.000000       0.026800       0.193000
54596     54596     beijing        116.1383       39.6772           81       185     2012      03        28        088              0.000000      14.716217       0.000000       0.309589       0.079000   -9999.000000       0.046600       0.290000
54596     54596     beijing        116.1383       39.6772           81       185     2012      03        29        089              0.000000      13.956360       0.000000       0.307690       0.075000   -9999.000000       0.016400       0.380000
54596     54596     beijing        116.1383       39.6772           81       185     2012      03        30        090              0.000000      14.185181       0.000000       0.304160   -9999.000000   -9999.000000       0.010000       0.452000
54596     54596     beijing        116.1383       39.6772           81       185     2012      03        31        091              0.000000      10.319885       0.000000       0.302833       0.070000   -9999.000000       0.043000       0.217000
54596     54596     beijing        116.1383       39.6772           81       185     2012      04        01        092              0.000000      10.945282       0.913141       0.301705       0.082000   -9999.000000       0.010000       0.453000
54596     54596     beijing        116.1383       39.6772           81       185     2012      04        02        093              0.000000       9.433319       0.000000       0.305014       0.085000   -9999.000000       0.037200       0.316000
54596     54596     beijing        116.1383       39.6772           81       185     2012      04        03        094              0.000000       8.267303       0.000000       0.305723       0.081000   -9999.000000   -9999.000000       0.613000
54596     54596     beijing        116.1383       39.6772           81       185     2012      04        04        095              0.000000      12.592224       0.159022       0.301761   -9999.000000   -9999.000000       0.010000       0.454000
54596     54596     beijing        116.1383       39.6772           81       185     2012      04        05        096              0.000000      13.548950       0.000000       0.297986   -9999.000000   -9999.000000       0.037700   -9999.000000
54596     54596     beijing        116.1383       39.6772           81       185     2012      04        06        097              0.000000      13.518066       0.000000       0.295710       0.089000   -9999.000000       0.010000       0.420000
54596     54596     beijing        116.1383       39.6772           81       185     2012      04        07        098              0.000000      14.223602       0.000000       0.291989       0.083000   -9999.000000       0.014300       0.389000
54596     54596     beijing        116.1383       39.6772           81       185     2012      04        08        099              0.000000      14.941711       0.804146       0.291220       0.082000   -9999.000000       0.037100       0.817000
54596     54596     beijing        116.1383       39.6772           81       185     2012      04        09        100              0.000000      17.118195       1.451038       0.287955       0.082000   -9999.000000       0.042900       0.548000
54596     54596     beijing        116.1383       39.6772           81       185     2012      04        10        101              0.000000      18.783264       0.937295       0.287075   -9999.000000   -9999.000000       0.010000   -9999.000000
54596     54596     beijing        116.1383       39.6772           81       185     2012      04        11        102              0.000000      17.310638       0.000000       0.287599       0.075000   -9999.000000       0.042200       0.613000
54596     54596     beijing        116.1383       39.6772           81       185     2012      04        12        103              0.000000      15.794037       0.000000       0.282951       0.087000   -9999.000000       0.023300       0.484000
54596     54596     beijing        116.1383       39.6772           81       185     2012      04        13        104              0.000000      18.274323       0.000000       0.279515       0.074000   -9999.000000       0.021700       0.673000
54596     54596     beijing        116.1383       39.6772           81       185     2012      04        14        105              0.000000      19.664673       0.000000       0.275697       0.079000   -9999.000000       0.041600       0.486000
54596     54596     beijing        116.1383       39.6772           81       185     2012      04        15        106              0.000000      21.302612       0.000000       0.269248   -9999.000000   -9999.000000       0.015200   -9999.000000
54596     54596     beijing        116.1383       39.6772           81       185     2012      04        16        107              0.000000      19.057373       0.000000       0.266853       0.071000   -9999.000000       0.010300       0.580000
54596     54596     beijing        116.1383       39.6772           81       185     2012      04        17        108              0.000000      18.296967       0.000000       0.263561       0.087000   -9999.000000   -9999.000000       0.651000
54596     54596     beijing        116.1383       39.6772           81       185     2012      04        18        109              0.000000      20.535553       1.896690       0.262652       0.084000   -9999.000000   -9999.000000       0.722000
54596     54596     beijing        116.1383       39.6772           81       185     2012      04        19        110              0.000000      19.149109       0.000000       0.274538       0.102000   -9999.000000       0.049300       0.617000
54596     54596     beijing        116.1383       39.6772           81       185     2012      04        20        111              0.000000      16.660553       0.460576       0.278791   -9999.000000   -9999.000000   -9999.000000   -9999.000000
54596     54596     beijing        116.1383       39.6772           81       185     2012      04        21        112              0.000000      15.781067       0.000000       0.282384   -9999.000000   -9999.000000       0.010000       1.000000
54596     54596     beijing        116.1383       39.6772           81       185     2012      04        22        113              0.000000      15.991119       0.000000       0.283445       0.142500   -9999.000000       0.046700       0.923000
54596     54596     beijing        116.1383       39.6772           81       185     2012      04        23        114              0.000000      20.372650       1.929541       0.276889       0.115000   -9999.000000       0.026700       0.646000
54596     54596     beijing        116.1383       39.6772           81       185     2012      04        24        115              0.000000      19.827026      39.579636       0.282768   -9999.000000   -9999.000000       0.037000       1.000000
54596     54596     beijing        116.1383       39.6772           81       185     2012      04        25        116              0.000000      14.271759       0.000000       0.370554   -9999.000000   -9999.000000       0.056500       0.742000
54596     54596     beijing        116.1383       39.6772           81       185     2012      04        26        117              0.000000      15.598022       0.000000       0.332985   -9999.000000   -9999.000000       0.050900       0.532000
54596     54596     beijing        116.1383       39.6772           81       185     2012      04        27        118              0.000000      18.324768       0.000000       0.321890       0.132000   -9999.000000   -9999.000000       0.446000
54596     54596     beijing        116.1383       39.6772           81       185     2012      04        28        119              0.000000      17.835632       0.000000       0.311855       0.112000   -9999.000000       0.049700       0.432000
54596     54596     beijing        116.1383       39.6772           81       185     2012      04        29        120              0.000000      16.634766       0.000000       0.306477       0.105000   -9999.000000       0.022400       0.237000
54596     54596     beijing        116.1383       39.6772           81       185     2012      04        30        121              0.000000      17.501343       0.000000       0.302052       0.131000   -9999.000000       0.037000       0.622000
54596     54596     beijing        116.1383       39.6772           81       185     2012      05        01        122              0.000000      19.937408       0.000000       0.299646       0.224000   -9999.000000       0.056500       0.389000
54596     54596     beijing        116.1383       39.6772           81       185     2012      05        02        123              0.000000      20.612732       0.000000       0.298050       0.164500   -9999.000000       0.020500       0.701000
54596     54596     beijing        116.1383       39.6772           81       185     2012      05        03        124              0.000000      23.709229       0.000000       0.290453       0.164500   -9999.000000       0.017800       0.393000
54596     54596     beijing        116.1383       39.6772           81       185     2012      05        04        125              0.000000      25.120087       0.000000       0.281912       0.147000   -9999.000000       0.052200   -9999.000000
54596     54596     beijing        116.1383       39.6772           81       185     2012      05        05        126              0.000000      25.953857       0.000000       0.274328       0.145500   -9999.000000       0.022600       0.481000
54596     54596     beijing        116.1383       39.6772           81       185     2012      05        06        127              0.000000      24.737213       0.000000       0.264936       0.185000   -9999.000000       0.045900       0.508000
54596     54596     beijing        116.1383       39.6772           81       185     2012      05        07        128              0.000000      24.760590       0.000000       0.260328   -9999.000000   -9999.000000   -9999.000000       0.722000
54596     54596     beijing        116.1383       39.6772           81       185     2012      05        08        129              0.000000      23.433563       0.000000       0.257129       0.153500   -9999.000000       0.010800       0.494000
54596     54596     beijing        116.1383       39.6772           81       185     2012      05        09        130              0.000000      24.862061       0.000000       0.250185       0.154000   -9999.000000       0.054100   -9999.000000
54596     54596     beijing        116.1383       39.6772           81       185     2012      05        10        131              0.000000      23.508453       0.897479       0.250250       0.176000   -9999.000000       0.028300       0.500000
54596     54596     beijing        116.1383       39.6772           81       185     2012      05        11        132              0.000000      26.322113       7.489593       0.248409       0.367000   -9999.000000       0.037100       0.514000
54596     54596     beijing        116.1383       39.6772           81       185     2012      05        12        133              0.000000      19.553009       0.390571       0.284845       0.273000   -9999.000000       0.056300       1.000000
54596     54596     beijing        116.1383       39.6772           81       185     2012      05        13        134              0.000000      21.343872       3.755199       0.291454       0.211000   -9999.000000       0.049900       0.739000
54596     54596     beijing        116.1383       39.6772           81       185     2012      05        14        135              0.000000      20.064362       0.148005       0.294252       0.188000   -9999.000000       0.010000   -9999.000000
54596     54596     beijing        116.1383       39.6772           81       185     2012      05        15        136              0.000000      20.848572       0.000000       0.279027       0.198000   -9999.000000       0.054300       0.535000
54596     54596     beijing        116.1383       39.6772           81       185     2012      05        16        137              0.000000      21.620178       0.000000       0.266669       0.209000   -9999.000000       0.023000       0.572000
54596     54596     beijing        116.1383       39.6772           81       185     2012      05        17        138              0.000000      22.660767       0.000000       0.255964       0.209000   -9999.000000       0.052200       0.689000
54596     54596     beijing        116.1383       39.6772           81       185     2012      05        18        139              0.000000      24.691254       0.000000       0.246201       0.198500   -9999.000000       0.051900       0.484000
54596     54596     beijing        116.1383       39.6772           81       185     2012      05        19        140              0.000000      25.962402       1.942039       0.239087       0.192000   -9999.000000       0.028900   -9999.000000
54596     54596     beijing        116.1383       39.6772           81       185     2012      05        20        141              0.000000      27.025970       0.000000       0.242320       0.176000   -9999.000000       0.031000       0.585000
54596     54596     beijing        116.1383       39.6772           81       185     2012      05        21        142              0.000000      24.067688       0.000000       0.244018       0.269000   -9999.000000       0.068400       0.479000
54596     54596     beijing        116.1383       39.6772           81       185     2012      05        22        143              0.000000      24.091736       0.000000       0.240929       0.275000   -9999.000000       0.038500       0.547000
54596     54596     beijing        116.1383       39.6772           81       185     2012      05        23        144              0.000000      25.211670       0.000000       0.232809   -9999.000000   -9999.000000       0.055300       0.365000
54596     54596     beijing        116.1383       39.6772           81       185     2012      05        24        145              0.000000      24.852448       0.000000       0.219923       0.220000   -9999.000000   -9999.000000       0.158000
54596     54596     beijing        116.1383       39.6772           81       185     2012      05        25        146              0.000000      24.578278       0.000000       0.212307   -9999.000000   -9999.000000       0.010000       0.288000
54596     54596     beijing        116.1383       39.6772           81       185     2012      05        26        147              0.000000      24.764740       0.236919       0.206880       0.203500   -9999.000000       0.061100       0.544000
54596     54596     beijing        116.1383       39.6772           81       185     2012      05        27        148              0.000000      28.251953       0.000000       0.199242       0.282000   -9999.000000       0.033000       0.377000
54596     54596     beijing        116.1383       39.6772           81       185     2012      05        28        149              0.000000      29.846191       0.000000       0.193834       0.211000   -9999.000000       0.039000       0.243000
54596     54596     beijing        116.1383       39.6772           81       185     2012      05        29        150              0.000000      30.423126       2.859699       0.190891       0.283000   -9999.000000       0.069800       0.427000
54596     54596     beijing        116.1383       39.6772           81       185     2012      05        30        151              0.000000      23.090240       0.000000       0.227305       0.217000   -9999.000000       0.061500   -9999.000000
54596     54596     beijing        116.1383       39.6772           81       185     2012      05        31        152              0.000000      24.920868       4.305878       0.214327       0.232000   -9999.000000   -9999.000000   -9999.000000
54596     54596     beijing        116.1383       39.6772           81       185     2012      06        01        153              0.000000      23.735199       0.000000       0.232809       0.296000   -9999.000000       0.070100       0.477000
54596     54596     beijing        116.1383       39.6772           81       185     2012      06        02        154              0.000000      23.293884       0.000000       0.241743       0.300000   -9999.000000       0.033100   -9999.000000
54596     54596     beijing        116.1383       39.6772           81       185     2012      06        03        155              0.000000      26.261078      13.885914       0.223897       0.332500   -9999.000000       0.066700       0.555000
54596     54596     beijing        116.1383       39.6772           81       185     2012      06        04        156              0.000000      22.860382       1.207011       0.306064       0.247000   -9999.000000       0.064000       0.447000
54596     54596     beijing        116.1383       39.6772           81       185     2012      06        05        157              0.000000      27.301422       0.000000       0.273854       0.247000   -9999.000000       0.010000       0.747000
54596     54596     beijing        116.1383       39.6772           81       185     2012      06        06        158              0.000000      28.739594       3.370556       0.248715       0.358000   -9999.000000       0.068000       0.705000
54596     54596     beijing        116.1383       39.6772           81       185     2012      06        07        159              0.120000      26.520538       0.316801       0.263258       0.319000   -9999.000000       0.068400   -9999.000000
54596     54596     beijing        116.1383       39.6772           81       185     2012      06        08        160              0.104667      27.999603       0.000000       0.250448       0.254500   -9999.000000       0.037900       0.650000
54596     54596     beijing        116.1383       39.6772           81       185     2012      06        09        161              0.096250      28.875031      10.136385       0.233279   -9999.000000   -9999.000000       0.054500       0.880000
54596     54596     beijing        116.1383       39.6772           81       185     2012      06        10        162              0.090167      25.939362       0.000000       0.298075       0.233000   -9999.000000   -9999.000000       1.000000
54596     54596     beijing        116.1383       39.6772           81       185     2012      06        11        163              0.000000      24.054230       0.000000       0.268421       0.210500   -9999.000000       0.010800       0.521000
54596     54596     beijing        116.1383       39.6772           81       185     2012      06        12        164              0.083429      26.824127       1.355255       0.242905       0.319000   -9999.000000       0.067200   -9999.000000
54596     54596     beijing        116.1383       39.6772           81       185     2012      06        13        165              0.000000      26.383026       1.042192       0.230840       0.246000   -9999.000000       0.037600       0.567000
54596     54596     beijing        116.1383       39.6772           81       185     2012      06        14        166              0.000000      24.099457       0.000000       0.234563       0.241500   -9999.000000       0.047500       0.417000
54596     54596     beijing        116.1383       39.6772           81       185     2012      06        15        167              0.000000      25.297302       0.000000       0.225274       0.243000   -9999.000000       0.064700       0.629000
54596     54596     beijing        116.1383       39.6772           81       185     2012      06        16        168              0.000000      26.485809       0.000000       0.215210       0.229000   -9999.000000       0.050600       0.508000
54596     54596     beijing        116.1383       39.6772           81       185     2012      06        17        169              0.000000      30.081390       0.159888       0.203194       0.323000   -9999.000000       0.021500   -9999.000000
54596     54596     beijing        116.1383       39.6772           81       185     2012      06        18        170              0.000000      32.048798       0.287887       0.194483       0.241500   -9999.000000       0.047600       0.574000
54596     54596     beijing        116.1383       39.6772           81       185     2012      06        19        171              0.000000      29.409332       1.065298       0.195463       0.245000   -9999.000000       0.025000   -9999.000000
54596     54596     beijing        116.1383       39.6772           81       185     2012      06        20        172              0.000000      30.252655       0.000000       0.194228       0.267000   -9999.000000       0.046700       0.589000
54596     54596     beijing        116.1383       39.6772           81       185     2012      06        21        173              0.000000      29.909332      10.809083       0.190919       0.222000   -9999.000000       0.044400       0.948000
54596     54596     beijing        116.1383       39.6772           81       185     2012      06        22        174              0.081000      29.971008       0.000000       0.245476       0.342000   -9999.000000       0.010000       0.572000
54596     54596     beijing        116.1383       39.6772           81       185     2012      06        23        175              0.000000      27.472565       4.793756       0.264047       0.389000   -9999.000000       0.058800       0.592000
54596     54596     beijing        116.1383       39.6772           81       185     2012      06        24        176              0.108895      26.583282      60.140755       0.272448   -9999.000000   -9999.000000       0.028400       1.000000
54596     54596     beijing        116.1383       39.6772           81       185     2012      06        25        177              0.118042      24.948059      14.528367       0.341866       0.310000   -9999.000000       0.051500       0.998000
54596     54596     beijing        116.1383       39.6772           81       185     2012      06        26        178              0.112792      25.346069      11.418218       0.360966       0.309000   -9999.000000       0.061900       0.883000
54596     54596     beijing        116.1383       39.6772           81       185     2012      06        27        179              0.108042      25.035706       2.180865       0.362609       0.270000   -9999.000000   -9999.000000       0.982000
54596     54596     beijing        116.1383       39.6772           81       185     2012      06        28        180              0.185833      25.683350      17.045238       0.340585       0.434000   -9999.000000       0.027400       0.873000
54596     54596     beijing        116.1383       39.6772           81       185     2012      06        29        181              0.220583      23.255737       3.139423       0.358666       0.324000   -9999.000000       0.057300       1.000000
54596     54596     beijing        116.1383       39.6772           81       185     2012      06        30        182              0.211458      24.762238       0.000000       0.352723       0.241000   -9999.000000       0.031600   -9999.000000
54596     54596     beijing        116.1383       39.6772           81       185     2012      07        01        183              0.206833      28.776367       0.756622       0.331587       0.242000   -9999.000000       0.040300   -9999.000000
54596     54596     beijing        116.1383       39.6772           81       185     2012      07        02        184              0.193875      30.030304       0.000000       0.321946       0.285500   -9999.000000       0.055900       0.791000
54596     54596     beijing        116.1383       39.6772           81       185     2012      07        03        185              0.180875      29.255981       5.505754       0.311093       0.395000   -9999.000000       0.034900       0.645000
54596     54596     beijing        116.1383       39.6772           81       185     2012      07        04        186              0.175625      30.140320       0.000000       0.304998       0.252500   -9999.000000       0.022300       0.852000
54596     54596     beijing        116.1383       39.6772           81       185     2012      07        05        187              0.175667      28.725677       7.954819       0.301176       0.261000   -9999.000000       0.068000       1.000000
54596     54596     beijing        116.1383       39.6772           81       185     2012      07        06        188              0.186500      26.713715       0.566829       0.319536   -9999.000000   -9999.000000       0.042600   -9999.000000
54596     54596     beijing        116.1383       39.6772           81       185     2012      07        07        189              0.191500      26.089966       4.433167       0.320969   -9999.000000   -9999.000000       0.055500       0.890000
54596     54596     beijing        116.1383       39.6772           81       185     2012      07        08        190              0.208542      28.140259      24.929537       0.322033       0.386000   -9999.000000   -9999.000000       0.734000
54596     54596     beijing        116.1383       39.6772           81       185     2012      07        09        191              0.230042      27.897980       2.694522       0.341875       0.418000   -9999.000000       0.021600       1.000000
54596     54596     beijing        116.1383       39.6772           81       185     2012      07        10        192              0.232833      27.176971      32.046272       0.352213       0.310000   -9999.000000       0.081800       1.000000
54596     54596     beijing        116.1383       39.6772           81       185     2012      07        11        193              0.232625      28.929657       0.963994       0.373361       0.247000   -9999.000000       0.044400   -9999.000000
54596     54596     beijing        116.1383       39.6772           81       185     2012      07        12        194              0.234792      28.508698       1.992849       0.348721       0.268000   -9999.000000       0.050700       0.942000
54596     54596     beijing        116.1383       39.6772           81       185     2012      07        13        195              0.228583      28.604645       2.341663       0.337178       0.328000   -9999.000000       0.070500       0.695000
54596     54596     beijing        116.1383       39.6772           81       185     2012      07        14        196              0.222125      27.338074       0.000000       0.329240       0.321000   -9999.000000       0.067500       0.672000
54596     54596     beijing        116.1383       39.6772           81       185     2012      07        15        197              0.216333      27.439087       0.000000       0.321181       0.250000   -9999.000000       0.021500       0.401000
54596     54596     beijing        116.1383       39.6772           81       185     2012      07        16        198              0.211708      28.419495       0.000000       0.313162       0.248000   -9999.000000       0.090900   -9999.000000
54596     54596     beijing        116.1383       39.6772           81       185     2012      07        17        199              0.207458      28.841522       0.000000       0.306939       0.236000   -9999.000000       0.049800       0.441000
54596     54596     beijing        116.1383       39.6772           81       185     2012      07        18        200              0.204292      28.895691       0.806845       0.302481       0.249500   -9999.000000       0.082900       0.587000
54596     54596     beijing        116.1383       39.6772           81       185     2012      07        19        201              0.203208      28.567871       0.000000       0.300662       0.358000   -9999.000000       0.089900       0.483000
54596     54596     beijing        116.1383       39.6772           81       185     2012      07        20        202              0.201043      29.285614       0.000000       0.298605       0.260500   -9999.000000       0.052500       0.501000
54596     54596     beijing        116.1383       39.6772           81       185     2012      07        21        203              0.276739      30.156281     300.687164       0.294730   -9999.000000   -9999.000000       0.091400       0.538000
54596     54596     beijing        116.1383       39.6772           81       185     2012      07        22        204              0.247042      26.226837       0.000000       0.512035       0.446000   -9999.000000       0.105700       0.804000
54596     54596     beijing        116.1383       39.6772           81       185     2012      07        23        205              0.236000      27.294830       0.000000       0.398530       0.457000   -9999.000000       0.056700       0.791000
54596     54596     beijing        116.1383       39.6772           81       185     2012      07        24        206              0.231708      28.089813       0.000000       0.350866       0.462000   -9999.000000       0.077900       0.670000
54596     54596     beijing        116.1383       39.6772           81       185     2012      07        25        207              0.233625      28.903168       0.583493       0.343265   -9999.000000   -9999.000000   -9999.000000       0.572000
54596     54596     beijing        116.1383       39.6772           81       185     2012      07        26        208              0.235458      27.898926       0.723993       0.341965   -9999.000000   -9999.000000       0.039100       0.657000
54596     54596     beijing        116.1383       39.6772           81       185     2012      07        27        209              0.241000      27.589386      38.500153       0.339812       0.434000   -9999.000000       0.101200       1.000000
54596     54596     beijing        116.1383       39.6772           81       185     2012      07        28        210              0.243208      27.816772       0.462944       0.406086       0.355000   -9999.000000       0.064500       1.000000
54596     54596     beijing        116.1383       39.6772           81       185     2012      07        29        211              0.235333      28.949341       0.000000       0.364609       0.339000   -9999.000000       0.052300       0.695000
54596     54596     beijing        116.1383       39.6772           81       185     2012      07        30        212              0.237625      29.630280      27.665483       0.342638   -9999.000000   -9999.000000       0.101100   -9999.000000
54596     54596     beijing        116.1383       39.6772           81       185     2012      07        31        213              0.255000      26.050964      34.467613       0.364248   -9999.000000   -9999.000000       0.132800       1.000000
54596     54596     beijing        116.1383       39.6772           81       185     2012      08        01        214              0.253125      22.561066      24.588175       0.389084       0.421000   -9999.000000       0.056900       1.000000
54596     54596     beijing        116.1383       39.6772           81       185     2012      08        02        215              0.240458      23.313141       0.000000       0.381333       0.311000   -9999.000000       0.112700       1.000000
54596     54596     beijing        116.1383       39.6772           81       185     2012      08        03        216              0.235708      27.507050       0.918839       0.358289       0.312000   -9999.000000       0.070400       0.810000
54596     54596     beijing        116.1383       39.6772           81       185     2012      08        04        217              0.230750      27.617157       0.611163       0.352997       0.392000   -9999.000000       0.103100   -9999.000000
54596     54596     beijing        116.1383       39.6772           81       185     2012      08        05        218              0.227500      29.409760       0.000000       0.347438       0.398000   -9999.000000       0.107100       0.881000
54596     54596     beijing        116.1383       39.6772           81       185     2012      08        06        219              0.223958      28.064392       0.000000       0.345847       0.325500   -9999.000000       0.033300       0.675000
54596     54596     beijing        116.1383       39.6772           81       185     2012      08        07        220              0.220708      29.114807       0.295464       0.340782       0.253000   -9999.000000   -9999.000000       0.797000
54596     54596     beijing        116.1383       39.6772           81       185     2012      08        08        221              0.215000      29.504852       3.238857       0.339172       0.299000   -9999.000000       0.080800       0.645000
54596     54596     beijing        116.1383       39.6772           81       185     2012      08        09        222              0.211333      28.673187       0.000000       0.337811       0.358000   -9999.000000       0.040700   -9999.000000
54596     54596     beijing        116.1383       39.6772           81       185     2012      08        10        223              0.204833      29.418793       0.000000       0.332239       0.369000   -9999.000000       0.068300       0.736000
54596     54596     beijing        116.1383       39.6772           81       185     2012      08        11        224              0.218625      28.754608      29.119190       0.329974   -9999.000000   -9999.000000   -9999.000000       1.000000
54596     54596     beijing        116.1383       39.6772           81       185     2012      08        12        225              0.238333      24.963104       3.621948       0.360551       0.410000   -9999.000000       0.033800       1.000000
54596     54596     beijing        116.1383       39.6772           81       185     2012      08        13        226              0.227083      26.812317       0.000000       0.357689       0.349000   -9999.000000       0.089600       0.577000
54596     54596     beijing        116.1383       39.6772           81       185     2012      08        14        227              0.222083      25.516510       0.859158       0.345152       0.462000   -9999.000000       0.064700   -9999.000000
54596     54596     beijing        116.1383       39.6772           81       185     2012      08        15        228              0.219542      23.241302       0.000000       0.340469       0.463000   -9999.000000       0.065800       0.839000
54596     54596     beijing        116.1383       39.6772           81       185     2012      08        16        229              0.213875      26.661438       0.000000       0.335920       0.405500   -9999.000000       0.084400       0.641000
54596     54596     beijing        116.1383       39.6772           81       185     2012      08        17        230              0.209875      27.027649       0.000000       0.331856       0.412500   -9999.000000       0.071600       0.701000
54596     54596     beijing        116.1383       39.6772           81       185     2012      08        18        231              0.210417      26.880585       0.112305       0.331417   -9999.000000   -9999.000000       0.032800       0.636000
54596     54596     beijing        116.1383       39.6772           81       185     2012      08        19        232              0.208042      26.005310       0.000000       0.331828       0.349000   -9999.000000       0.091800       0.519000
54596     54596     beijing        116.1383       39.6772           81       185     2012      08        20        233              0.202625      27.457642       6.688657       0.326138       0.426000   -9999.000000       0.062800       0.598000
54596     54596     beijing        116.1383       39.6772           81       185     2012      08        21        234              0.189667      26.732452       0.000000       0.324472   -9999.000000   -9999.000000       0.096600       0.651000
54596     54596     beijing        116.1383       39.6772           81       185     2012      08        22        235              0.178130      24.019775       0.000000       0.319332       0.412000   -9999.000000       0.108100   -9999.000000
54596     54596     beijing        116.1383       39.6772           81       185     2012      08        23        236              0.170958      23.597534       0.000000       0.316684       0.470000   -9999.000000       0.038400       0.358000
54596     54596     beijing        116.1383       39.6772           81       185     2012      08        24        237              0.163375      24.718292       0.408212       0.315972       0.438000   -9999.000000       0.112900       0.644000
54596     54596     beijing        116.1383       39.6772           81       185     2012      08        25        238              0.000000      24.608002       0.000000       0.313940       0.486000   -9999.000000       0.117600       0.324000
54596     54596     beijing        116.1383       39.6772           81       185     2012      08        26        239              0.151250      25.436737       5.768543       0.313102   -9999.000000   -9999.000000       0.074300       0.690000
54596     54596     beijing        116.1383       39.6772           81       185     2012      08        27        240              0.179875      26.593597       1.836038       0.317313       0.384000   -9999.000000       0.085400       0.575000
54596     54596     beijing        116.1383       39.6772           81       185     2012      08        28        241              0.173583      26.410339       0.000000       0.323939       0.437000   -9999.000000   -9999.000000   -9999.000000
54596     54596     beijing        116.1383       39.6772           81       185     2012      08        29        242              0.162208      28.158295       0.000000       0.317055       0.451000   -9999.000000       0.031100       0.701000
54596     54596     beijing        116.1383       39.6772           81       185     2012      08        30        243              0.155208      28.561279       0.778384       0.312340       0.458000   -9999.000000       0.085000       0.580000
54596     54596     beijing        116.1383       39.6772           81       185     2012      08        31        244              0.152833      28.876495       0.000000       0.311710   -9999.000000   -9999.000000       0.049600       0.689000
54596     54596     beijing        116.1383       39.6772           81       185     2012      09        01        245              0.184333      28.472076      87.752434       0.311858   -9999.000000   -9999.000000       0.071300       1.000000
54596     54596     beijing        116.1383       39.6772           81       185     2012      09        02        246              0.231667      26.056702      10.704090       0.377852       0.378000   -9999.000000       0.092400   -9999.000000
54596     54596     beijing        116.1383       39.6772           81       185     2012      09        03        247              0.213708      22.638947       0.000000       0.373311       0.340000   -9999.000000       0.049300       0.875000
54596     54596     beijing        116.1383       39.6772           81       185     2012      09        04        248              0.205000      21.579895       0.000000       0.348608       0.252000   -9999.000000       0.036800       0.574000
54596     54596     beijing        116.1383       39.6772           81       185     2012      09        05        249              0.199625      21.819519       0.000000       0.342191       0.341000   -9999.000000       0.076000       0.714000
54596     54596     beijing        116.1383       39.6772           81       185     2012      09        06        250              0.218458      22.091217      12.520821       0.338710       0.462000   -9999.000000       0.036100       1.000000
54596     54596     beijing        116.1383       39.6772           81       185     2012      09        07        251              0.229958      21.694580       0.718181       0.354126       0.333500   -9999.000000       0.068900   -9999.000000
54596     54596     beijing        116.1383       39.6772           81       185     2012      09        08        252              0.222208      23.323486       0.000000       0.349308       0.332000   -9999.000000   -9999.000000       0.710000
54596     54596     beijing        116.1383       39.6772           81       185     2012      09        09        253              0.218000      23.954834       0.000000       0.342289       0.296000   -9999.000000       0.018400       0.721000
54596     54596     beijing        116.1383       39.6772           81       185     2012      09        10        254              0.215333      24.659454       0.326837       0.339225       0.311500   -9999.000000       0.078800       0.893000
54596     54596     beijing        116.1383       39.6772           81       185     2012      09        11        255              0.212542      24.504395       0.681609       0.337914       0.479000   -9999.000000       0.042500       0.663000
54596     54596     beijing        116.1383       39.6772           81       185     2012      09        12        256              0.203792      23.452240       0.000000       0.337509   -9999.000000   -9999.000000       0.037300   -9999.000000
54596     54596     beijing        116.1383       39.6772           81       185     2012      09        13        257              0.197458      20.669647       1.699731       0.332581       0.398000   -9999.000000       0.072500       0.605000
54596     54596     beijing        116.1383       39.6772           81       185     2012      09        14        258              0.191750      20.638153       0.246853       0.331488       0.337000   -9999.000000       0.073600       0.683000
54596     54596     beijing        116.1383       39.6772           81       185     2012      09        15        259              0.187042      20.701294       0.000000       0.328886   -9999.000000   -9999.000000       0.029400       0.553000
54596     54596     beijing        116.1383       39.6772           81       185     2012      09        16        260              0.182208      21.215820       0.000000       0.326707   -9999.000000   -9999.000000       0.077000       0.486000
54596     54596     beijing        116.1383       39.6772           81       185     2012      09        17        261              0.178458      21.194244       0.956375       0.324715       0.441000   -9999.000000       0.043300       0.283000
54596     54596     beijing        116.1383       39.6772           81       185     2012      09        18        262              0.174083      21.752625       1.057748       0.323317       0.375000   -9999.000000       0.063300       0.357000
54596     54596     beijing        116.1383       39.6772           81       185     2012      09        19        263              0.170583      21.975464       0.000000       0.323110       0.294000   -9999.000000       0.066400       0.426000
54596     54596     beijing        116.1383       39.6772           81       185     2012      09        20        264              0.172417      22.092651       0.000000       0.321144       0.325000   -9999.000000       0.035000       0.478000
54596     54596     beijing        116.1383       39.6772           81       185     2012      09        21        265              0.172542      22.789001       0.215590       0.320571   -9999.000000   -9999.000000       0.032500       0.315000
54596     54596     beijing        116.1383       39.6772           81       185     2012      09        22        266              0.173333      22.313812       0.000000       0.321215       0.356000   -9999.000000       0.073100       0.604000
54596     54596     beijing        116.1383       39.6772           81       185     2012      09        23        267              0.172042      22.448578       0.000000       0.319982       0.276500   -9999.000000       0.041500       0.478000
54596     54596     beijing        116.1383       39.6772           81       185     2012      09        24        268              0.170917      23.193726       0.460553       0.319040       0.291500   -9999.000000       0.094200       0.714000
54596     54596     beijing        116.1383       39.6772           81       185     2012      09        25        269              0.185250      22.328796      17.105682       0.320511       0.310000   -9999.000000   -9999.000000       1.000000
54596     54596     beijing        116.1383       39.6772           81       185     2012      09        26        270              0.193292      19.877136       0.000000       0.354888       0.275000   -9999.000000       0.041700   -9999.000000
54596     54596     beijing        116.1383       39.6772           81       185     2012      09        27        271              0.192214      20.730621       2.803661       0.339789   -9999.000000   -9999.000000       0.098300       0.644000
54596     54596     beijing        116.1383       39.6772           81       185     2012      09        28        272              0.182688      17.287537       0.000000       0.340356   -9999.000000   -9999.000000       0.051700       0.445000
54596     54596     beijing        116.1383       39.6772           81       185     2012      09        29        273              0.180042      17.013611       0.000000       0.332043       0.272000   -9999.000000       0.057500       0.743000
54596     54596     beijing        116.1383       39.6772           81       185     2012      09        30        274              0.175042      18.098938       0.000000       0.329091       0.264000   -9999.000000       0.091400       0.557000
54596     54596     beijing        116.1383       39.6772           81       185     2012      10        01        275              0.171333      18.540894       0.000000       0.326827       0.180000   -9999.000000       0.115900   -9999.000000
54596     54596     beijing        116.1383       39.6772           81       185     2012      10        02        276              0.168167      19.254547       0.000000       0.324768       0.249000   -9999.000000       0.034800       0.564000
54596     54596     beijing        116.1383       39.6772           81       185     2012      10        03        277              0.166875      20.026733       0.000000       0.323823   -9999.000000   -9999.000000       0.115200       0.393000
54596     54596     beijing        116.1383       39.6772           81       185     2012      10        04        278              0.161375      18.470886       0.000000       0.322538       0.220000   -9999.000000       0.056100       0.965000
54596     54596     beijing        116.1383       39.6772           81       185     2012      10        05        279              0.162833      18.197174       0.000000       0.322724       0.224000   -9999.000000       0.084600       0.436000
54596     54596     beijing        116.1383       39.6772           81       185     2012      10        06        280              0.158739      18.748413       0.000000       0.321449       0.217000   -9999.000000       0.116200   -9999.000000
54596     54596     beijing        116.1383       39.6772           81       185     2012      10        07        281              0.156750      18.877167       3.812843       0.320746       0.217000   -9999.000000       0.049000       0.474000
54596     54596     beijing        116.1383       39.6772           81       185     2012      10        08        282              0.156750      18.946838       4.423125       0.326055   -9999.000000   -9999.000000       0.055000       0.550000
54596     54596     beijing        116.1383       39.6772           81       185     2012      10        09        283              0.160583      19.675446       0.250203       0.328872   -9999.000000   -9999.000000       0.084200       0.968000
54596     54596     beijing        116.1383       39.6772           81       185     2012      10        10        284              0.158208      16.692963       0.000000       0.330216       0.230000   -9999.000000       0.032600       0.364000
54596     54596     beijing        116.1383       39.6772           81       185     2012      10        11        285              0.152958      15.882233       0.000000       0.325538       0.165000   -9999.000000       0.067900   -9999.000000
54596     54596     beijing        116.1383       39.6772           81       185     2012      10        12        286              0.152708      15.978729       0.000000       0.324412       0.174000   -9999.000000   -9999.000000       0.550000
54596     54596     beijing        116.1383       39.6772           81       185     2012      10        13        287              0.148333      17.124817       0.000000       0.323867   -9999.000000   -9999.000000       0.031800       0.403000
54596     54596     beijing        116.1383       39.6772           81       185     2012      10        14        288              0.146000      14.402405       0.000000       0.321674   -9999.000000   -9999.000000       0.088600       0.583000
54596     54596     beijing        116.1383       39.6772           81       185     2012      10        15        289              0.145000      14.020325       2.913083       0.321940       0.178000   -9999.000000       0.033700       0.332000
54596     54596     beijing        116.1383       39.6772           81       185     2012      10        16        290              0.165435      13.817322       5.238420       0.327397       0.224000   -9999.000000       0.027700       0.538000
54596     54596     beijing        116.1383       39.6772           81       185     2012      10        17        291              0.161500      11.767120       0.105493       0.341179       0.186000   -9999.000000       0.063700       0.324000
54596     54596     beijing        116.1383       39.6772           81       185     2012      10        18        292              0.158667      12.278046       0.000000       0.331085       0.165000   -9999.000000       0.063200       0.516000
54596     54596     beijing        116.1383       39.6772           81       185     2012      10        19        293              0.155958      13.430878       0.000000       0.328831   -9999.000000   -9999.000000       0.010000       0.507000
54596     54596     beijing        116.1383       39.6772           81       185     2012      10        20        294              0.155250      13.588959       0.000000       0.327357       0.180500   -9999.000000       0.075400       0.387000
54596     54596     beijing        116.1383       39.6772           81       185     2012      10        21        295              0.177083      14.918610      17.141609       0.326540   -9999.000000   -9999.000000       0.028200       0.538000
54596     54596     beijing        116.1383       39.6772           81       185     2012      10        22        296              0.185250      11.241272       0.000000       0.356761   -9999.000000   -9999.000000       0.059100       0.501000
54596     54596     beijing        116.1383       39.6772           81       185     2012      10        23        297              0.178750      12.058441       0.365022       0.343237   -9999.000000   -9999.000000       0.060400       0.867000
54596     54596     beijing        116.1383       39.6772           81       185     2012      10        24        298              0.174875      13.480774       0.000000       0.337648   -9999.000000   -9999.000000       0.010000       0.570000
54596     54596     beijing        116.1383       39.6772           81       185     2012      10        25        299              0.000000      14.893829       0.000000       0.334811   -9999.000000   -9999.000000       0.060000   -9999.000000
54596     54596     beijing        116.1383       39.6772           81       185     2012      10        26        300              0.170583      14.963501       0.258331       0.332324       0.137000   -9999.000000       0.011600       0.510000
54596     54596     beijing        116.1383       39.6772           81       185     2012      10        27        301              0.166708      14.491455       0.000000       0.332165       0.141000   -9999.000000       0.025100       0.408000
54596     54596     beijing        116.1383       39.6772           81       185     2012      10        28        302              0.000000      14.177582       0.000000       0.329661       0.117000   -9999.000000       0.049100       0.587000
54596     54596     beijing        116.1383       39.6772           81       185     2012      10        29        303              0.156957      12.226288       0.000000       0.328004   -9999.000000   -9999.000000   -9999.000000       0.576000
54596     54596     beijing        116.1383       39.6772           81       185     2012      10        30        304              0.151375      10.677307       0.000000       0.327410   -9999.000000   -9999.000000       0.010000   -9999.000000
54596     54596     beijing        116.1383       39.6772           81       185     2012      10        31        305              0.149833       9.226501       0.000000       0.326281       0.110000   -9999.000000       0.060800       0.489000
54596     54596     beijing        116.1383       39.6772           81       185     2012      11        01        306              0.148417       9.352936       0.190005       0.326076       0.107000   -9999.000000       0.014600       0.414000
54596     54596     beijing        116.1383       39.6772           81       185     2012      11        02        307              0.149250       9.767456       0.000000       0.327146       0.108000   -9999.000000       0.044300       0.619000
54596     54596     beijing        116.1383       39.6772           81       185     2012      11        03        308              0.203083      10.503815      83.914864       0.326864   -9999.000000   -9999.000000       0.078900       1.000000
54596     54596     beijing        116.1383       39.6772           81       185     2012      11        04        309              0.222333       9.391144       9.830564       0.376391   -9999.000000   -9999.000000       0.039000   -9999.000000
54596     54596     beijing        116.1383       39.6772           81       185     2012      11        05        310              0.208565       7.796265       0.834738       0.376475   -9999.000000   -9999.000000       0.013100       0.978000
54596     54596     beijing        116.1383       39.6772           81       185     2012      11        06        311              0.204083       6.974884       0.000000       0.376479       0.152000   -9999.000000       0.063700       0.742000
54596     54596     beijing        116.1383       39.6772           81       185     2012      11        07        312              0.201792       7.160126       0.125200       0.364149       0.151000   -9999.000000       0.013100       0.804000
54596     54596     beijing        116.1383       39.6772           81       185     2012      11        08        313              0.199667       7.917175       0.115242       0.355267       0.144000   -9999.000000   -9999.000000       0.629000
54596     54596     beijing        116.1383       39.6772           81       185     2012      11        09        314              0.199500       7.881500       0.957227       0.349399   -9999.000000   -9999.000000   -9999.000000   -9999.000000
54596     54596     beijing        116.1383       39.6772           81       185     2012      11        10        315              0.214917       8.452118      14.725271       0.346906   -9999.000000   -9999.000000       0.010000       1.000000
54596     54596     beijing        116.1383       39.6772           81       185     2012      11        11        316              0.206042       5.483795       0.000000       0.365690   -9999.000000   -9999.000000       0.055900       0.714000
54596     54596     beijing        116.1383       39.6772           81       185     2012      11        12        317              0.201667       4.070923       0.000000       0.350201   -9999.000000   -9999.000000       0.013600       0.790000
54596     54596     beijing        116.1383       39.6772           81       185     2012      11        13        318              0.000000       4.718597       0.000000       0.346900       0.134000   -9999.000000       0.019100       0.543000
54596     54596     beijing        116.1383       39.6772           81       185     2012      11        14        319              0.193750       3.441315       0.139658       0.340369   -9999.000000   -9999.000000       0.054300       0.455000
54596     54596     beijing        116.1383       39.6772           81       185     2012      11        15        320              0.198583       3.647430       7.364152       0.338761   -9999.000000   -9999.000000       0.054500       1.000000
54596     54596     beijing        116.1383       39.6772           81       185     2012      11        16        321              0.200500       4.542236       0.273210       0.345575   -9999.000000   -9999.000000       0.010000       0.722000
54596     54596     beijing        116.1383       39.6772           81       185     2012      11        17        322              0.000000       3.577789       0.161781       0.356786       0.136000   -9999.000000       0.051000       0.604000
54596     54596     beijing        116.1383       39.6772           81       185     2012      11        18        323              0.195000       4.604736       0.000000       0.347971   -9999.000000   -9999.000000       0.016200       0.462000
54596     54596     beijing        116.1383       39.6772           81       185     2012      11        19        324              0.193208       3.929199       0.000000       0.345818       0.131000   -9999.000000       0.037800       0.349000
54596     54596     beijing        116.1383       39.6772           81       185     2012      11        20        325              0.191917       3.984131       0.000000       0.342543   -9999.000000   -9999.000000       0.045400       0.380000
54596     54596     beijing        116.1383       39.6772           81       185     2012      11        21        326              0.191833       4.470734       0.158239       0.343432   -9999.000000   -9999.000000       0.013400       0.712000
54596     54596     beijing        116.1383       39.6772           81       185     2012      11        22        327              0.190708       4.713470       0.164220       0.344022   -9999.000000   -9999.000000       0.010000       0.473000
54596     54596     beijing        116.1383       39.6772           81       185     2012      11        23        328              0.186250       3.095001       0.134754       0.328492   -9999.000000   -9999.000000       0.041900   -9999.000000
54596     54596     beijing        116.1383       39.6772           81       185     2012      11        24        329              0.183417       2.123505       0.000000       0.310627   -9999.000000   -9999.000000       0.012700       0.420000
54596     54596     beijing        116.1383       39.6772           81       185     2012      11        25        330              0.184417       2.256256       0.000000       0.318839   -9999.000000   -9999.000000       0.039300       0.503000
54596     54596     beijing        116.1383       39.6772           81       185     2012      11        26        331              0.181875       1.982208       0.000000       0.319146   -9999.000000   -9999.000000   -9999.000000       0.828000
54596     54596     beijing        116.1383       39.6772           81       185     2012      11        27        332              0.180000       2.166962       0.000000       0.308733   -9999.000000   -9999.000000       0.010000       0.608000
54596     54596     beijing        116.1383       39.6772           81       185     2012      11        28        333              0.177958       1.610626       0.000000       0.310095   -9999.000000   -9999.000000       0.030300   -9999.000000
54596     54596     beijing        116.1383       39.6772           81       185     2012      11        29        334              0.167875       1.518829       0.000000       0.287984   -9999.000000   -9999.000000       0.010000       0.684000
54596     54596     beijing        116.1383       39.6772           81       185     2012      11        30        335              0.150875       0.765533       0.000000       0.267387   -9999.000000   -9999.000000       0.010000       0.329000
54596     54596     beijing        116.1383       39.6772           81       185     2012      12        01        336              0.132667      -1.126038       0.079936       0.206637   -9999.000000   -9999.000000       0.031600       0.617000
54596     54596     beijing        116.1383       39.6772           81       185     2012      12        02        337              0.122208      -2.059540       0.213534       0.179323   -9999.000000   -9999.000000       0.030900       0.414000
54596     54596     beijing        116.1383       39.6772           81       185     2012      12        03        338              0.116833      -1.751160       0.076540       0.177960   -9999.000000   -9999.000000       0.010000   -9999.000000
54596     54596     beijing        116.1383       39.6772           81       185     2012      12        04        339              0.107000      -0.901917       0.000000       0.207856   -9999.000000   -9999.000000       0.036300       0.418000
54596     54596     beijing        116.1383       39.6772           81       185     2012      12        05        340              0.096870      -0.691925       0.000000       0.203769   -9999.000000   -9999.000000       0.010000       0.428000
54596     54596     beijing        116.1383       39.6772           81       185     2012      12        06        341              0.088870      -3.144897       0.153371       0.171167   -9999.000000   -9999.000000       0.031500       0.731000
54596     54596     beijing        116.1383       39.6772           81       185     2012      12        07        342              0.088087      -3.622131       0.000000       0.160473   -9999.000000   -9999.000000       0.034200       0.374000
54596     54596     beijing        116.1383       39.6772           81       185     2012      12        08        343              0.084267      -3.158234       0.000000       0.173184   -9999.000000   -9999.000000       0.010000   -9999.000000
54596     54596     beijing        116.1383       39.6772           81       185     2012      12        09        344              0.083727      -4.616272       0.000000       0.153932   -9999.000000   -9999.000000       0.033200       0.486000
54596     54596     beijing        116.1383       39.6772           81       185     2012      12        10        345              0.083933      -2.486084       0.000000       0.176352   -9999.000000   -9999.000000       0.027400       0.309000
54596     54596     beijing        116.1383       39.6772           81       185     2012      12        11        346              0.083550      -3.174255       0.000000       0.170538   -9999.000000   -9999.000000       0.010000       0.439000
54596     54596     beijing        116.1383       39.6772           81       185     2012      12        12        347              0.087167      -2.782837       0.491605       0.170530   -9999.000000   -9999.000000       0.019400       0.291000
54596     54596     beijing        116.1383       39.6772           81       185     2012      12        13        348              0.089917      -2.830872       8.746017       0.164019   -9999.000000   -9999.000000   -9999.000000       0.170000
54596     54596     beijing        116.1383       39.6772           81       185     2012      12        14        349              0.097208      -1.721252       2.189994       0.172700   -9999.000000   -9999.000000       0.010000       0.334000
54596     54596     beijing        116.1383       39.6772           81       185     2012      12        15        350              0.000000      -1.020447       0.064498       0.171657   -9999.000000   -9999.000000       0.035600       0.853000
54596     54596     beijing        116.1383       39.6772           81       185     2012      12        16        351              0.112708      -0.794617       1.241821       0.184730   -9999.000000   -9999.000000       0.010000       0.664000
54596     54596     beijing        116.1383       39.6772           81       185     2012      12        17        352              0.093292      -1.935699       0.000000       0.173857   -9999.000000   -9999.000000       0.010000       0.126000
54596     54596     beijing        116.1383       39.6772           81       185     2012      12        18        353              0.084417      -3.040314       0.000000       0.172733   -9999.000000   -9999.000000       0.026800       0.486000
54596     54596     beijing        116.1383       39.6772           81       185     2012      12        19        354              0.084583      -3.768433       0.000000       0.162992   -9999.000000   -9999.000000       0.010000       0.212000
54596     54596     beijing        116.1383       39.6772           81       185     2012      12        20        355              0.000000      -4.192139       1.583071       0.156247   -9999.000000   -9999.000000       0.010000       0.731000
54596     54596     beijing        116.1383       39.6772           81       185     2012      12        21        356              0.087542      -2.820312       0.000000       0.161749   -9999.000000   -9999.000000       0.024500       0.378000
54596     54596     beijing        116.1383       39.6772           81       185     2012      12        22        357              0.083722      -3.120605       0.000000       0.170784   -9999.000000   -9999.000000       0.010000   -9999.000000
54596     54596     beijing        116.1383       39.6772           81       185     2012      12        23        358              0.081600      -5.654663       0.000000       0.156477   -9999.000000   -9999.000000   -9999.000000       0.367000
54596     54596     beijing        116.1383       39.6772           81       185     2012      12        24        359              0.000000      -8.168365       0.000000       0.142807   -9999.000000   -9999.000000   -9999.000000       0.358000
54596     54596     beijing        116.1383       39.6772           81       185     2012      12        25        360              0.000000      -6.734192       0.000000       0.143670   -9999.000000   -9999.000000       0.010000       0.585000
54596     54596     beijing        116.1383       39.6772           81       185     2012      12        26        361              0.000000      -7.330627       0.000000       0.143237   -9999.000000   -9999.000000       0.023800       0.401000
54596     54596     beijing        116.1383       39.6772           81       185     2012      12        27        362              0.000000      -7.160767       0.000000       0.142977   -9999.000000   -9999.000000       0.010000   -9999.000000
54596     54596     beijing        116.1383       39.6772           81       185     2012      12        28        363              0.000000      -6.612091       3.850781       0.143224   -9999.000000   -9999.000000       0.010000       0.384000
54596     54596     beijing        116.1383       39.6772           81       185     2012      12        29        364              0.000000      -4.548981       0.000000       0.144337   -9999.000000   -9999.000000   -9999.000000   -9999.000000
54596     54596     beijing        116.1383       39.6772           81       185     2012      12        30        365              0.000000      -4.365997       0.000000       0.145394   -9999.000000   -9999.000000       0.019800       0.767000
54596     54596     beijing        116.1383       39.6772           81       185     2012      12        31        366              0.000000      -5.190643       2.490651       0.148574   -9999.000000   -9999.000000       0.010000   -9999.000000
