# Supplementary material for: Research on Fusing Multisatellite Soil Moisture Data Based on Bayesian Model Averaging
Source: Hindawi journal article supplement (doi:10.1155/2018/9310838), 2018-06-25
Supplement: f1 [file 9310838.f1.zip › 2012_sm00-10cm_daily_ZDB_ZHY_54710_366days_allin.txt]

54710     54710     hebei          116.1667       37.8667           89       185     2012      01        01        001              0.000000   -9999.000000       0.000000   -9999.000000   -9999.000000       0.083200       0.073400   -9999.000000
54710     54710     hebei          116.1667       37.8667           89       185     2012      01        02        002              0.087292      -2.325836       0.000000       0.190998   -9999.000000       0.038600       0.063900       0.040000
54710     54710     hebei          116.1667       37.8667           89       185     2012      01        03        003              0.000000      -3.255585       0.000000       0.181921   -9999.000000   -9999.000000       0.072200       0.053000
54710     54710     hebei          116.1667       37.8667           89       185     2012      01        04        004              0.075208      -3.452332       0.045106       0.184212   -9999.000000   -9999.000000   -9999.000000   -9999.000000
54710     54710     hebei          116.1667       37.8667           89       185     2012      01        05        005              0.075042      -3.201874       0.039948       0.185490   -9999.000000   -9999.000000       0.027800       0.002000
54710     54710     hebei          116.1667       37.8667           89       185     2012      01        06        006              0.075125      -2.537506       0.000000       0.194104   -9999.000000       0.043800       0.078200       0.082000
54710     54710     hebei          116.1667       37.8667           89       185     2012      01        07        007              0.077125      -2.314453       0.000000       0.199870   -9999.000000   -9999.000000       0.059900       0.098000
54710     54710     hebei          116.1667       37.8667           89       185     2012      01        08        008              0.000000      -2.114899       0.000000       0.191491   -9999.000000       0.040300       0.074600       0.041000
54710     54710     hebei          116.1667       37.8667           89       185     2012      01        09        009              0.075167      -2.507050       0.000000       0.194366   -9999.000000   -9999.000000       0.060800   -9999.000000
54710     54710     hebei          116.1667       37.8667           89       185     2012      01        10        010              0.073375      -3.049500       0.000000       0.188618   -9999.000000       0.079800       0.062000   -9999.000000
54710     54710     hebei          116.1667       37.8667           89       185     2012      01        11        011              0.071042      -4.412384       0.000000       0.172102   -9999.000000       0.064000       0.038000   -9999.000000
54710     54710     hebei          116.1667       37.8667           89       185     2012      01        12        012              0.071833      -3.382263       0.000000       0.182233       0.059000   -9999.000000       0.065200       0.103000
54710     54710     hebei          116.1667       37.8667           89       185     2012      01        13        013              0.072292      -1.997467       0.000000       0.202521       0.083000       0.040100       0.048300       0.021000
54710     54710     hebei          116.1667       37.8667           89       185     2012      01        14        014              0.074000      -1.251648       0.000000       0.217336   -9999.000000   -9999.000000       0.060800   -9999.000000
54710     54710     hebei          116.1667       37.8667           89       185     2012      01        15        015              0.076875      -0.656891       0.201866       0.224588   -9999.000000       0.015100   -9999.000000       0.005000
54710     54710     hebei          116.1667       37.8667           89       185     2012      01        16        016              0.082000      -0.307098       0.000000       0.231248   -9999.000000       0.029000       0.026700       0.029000
54710     54710     hebei          116.1667       37.8667           89       185     2012      01        17        017              0.000000       0.139099       0.000000       0.235844   -9999.000000   -9999.000000       0.065200       0.137000
54710     54710     hebei          116.1667       37.8667           89       185     2012      01        18        018              0.094333       0.665161       0.000000       0.254545   -9999.000000   -9999.000000       0.054900       0.015000
54710     54710     hebei          116.1667       37.8667           89       185     2012      01        19        019              0.097667      -0.034760       0.032819       0.228911   -9999.000000       0.189600       0.054900   -9999.000000
54710     54710     hebei          116.1667       37.8667           89       185     2012      01        20        020              0.098625       0.534210       0.000000       0.250290   -9999.000000       0.046100       0.061600       0.133000
54710     54710     hebei          116.1667       37.8667           89       185     2012      01        21        021              0.083958      -1.234924       0.000000       0.220237   -9999.000000   -9999.000000   -9999.000000       0.021000
54710     54710     hebei          116.1667       37.8667           89       185     2012      01        22        022              0.072750      -5.244171       0.000000       0.169878   -9999.000000   -9999.000000       0.012600       0.068000
54710     54710     hebei          116.1667       37.8667           89       185     2012      01        23        023              0.070500      -4.753571       0.000000       0.171878   -9999.000000       0.053800       0.067600   -9999.000000
54710     54710     hebei          116.1667       37.8667           89       185     2012      01        24        024              0.068750      -3.702972       0.000000       0.182995   -9999.000000       0.007800   -9999.000000   -9999.000000
54710     54710     hebei          116.1667       37.8667           89       185     2012      01        25        025              0.069375      -3.494629       0.000000       0.186192       0.083000       0.005400       0.062800       0.099000
54710     54710     hebei          116.1667       37.8667           89       185     2012      01        26        026              0.072083      -1.629303       0.000000       0.208237   -9999.000000       0.042300       0.064700       0.041000
54710     54710     hebei          116.1667       37.8667           89       185     2012      01        27        027              0.074708      -0.521179       0.000000       0.226780   -9999.000000   -9999.000000       0.052700       0.050000
54710     54710     hebei          116.1667       37.8667           89       185     2012      01        28        028              0.076667      -0.493256       0.000000       0.228972   -9999.000000   -9999.000000       0.045900   -9999.000000
54710     54710     hebei          116.1667       37.8667           89       185     2012      01        29        029              0.077042      -1.262085       0.000000       0.216502       0.087000   -9999.000000       0.071600   -9999.000000
54710     54710     hebei          116.1667       37.8667           89       185     2012      01        30        030              0.078667      -1.664948       0.000000       0.201966       0.084000   -9999.000000       0.054100       0.070000
54710     54710     hebei          116.1667       37.8667           89       185     2012      01        31        031              0.077750      -0.721558       0.000000       0.223510   -9999.000000       0.021200       0.064100       0.024000
54710     54710     hebei          116.1667       37.8667           89       185     2012      02        01        032              0.071458      -1.950562       0.000000       0.209689   -9999.000000   -9999.000000   -9999.000000       0.018000
54710     54710     hebei          116.1667       37.8667           89       185     2012      02        02        033              0.067917      -4.291656       0.000000       0.180984       0.054000       0.011500       0.024600   -9999.000000
54710     54710     hebei          116.1667       37.8667           89       185     2012      02        03        034              0.069625      -3.640228       0.000000       0.181864       0.079000       0.048600       0.068100   -9999.000000
54710     54710     hebei          116.1667       37.8667           89       185     2012      02        04        035              0.071250      -1.731903       0.000000       0.211485   -9999.000000   -9999.000000       0.051300       0.063000
54710     54710     hebei          116.1667       37.8667           89       185     2012      02        05        036              0.074917      -1.749237       0.000000       0.202312       0.083000   -9999.000000       0.054100       0.115000
54710     54710     hebei          116.1667       37.8667           89       185     2012      02        06        037              0.074792      -0.267761       0.000000       0.228084   -9999.000000   -9999.000000       0.066000       0.015000
54710     54710     hebei          116.1667       37.8667           89       185     2012      02        07        038              0.068750      -2.445221       0.000000       0.212232   -9999.000000       0.065600   -9999.000000   -9999.000000
54710     54710     hebei          116.1667       37.8667           89       185     2012      02        08        039              0.068708      -3.714508       0.000000       0.183038       0.079000       0.006800       0.031200   -9999.000000
54710     54710     hebei          116.1667       37.8667           89       185     2012      02        09        040              0.070333      -2.165283       0.000000       0.201807       0.077000   -9999.000000       0.071800   -9999.000000
54710     54710     hebei          116.1667       37.8667           89       185     2012      02        10        041              0.070292      -1.768402       0.000000       0.210657       0.080000       0.051800       0.052200       0.091000
54710     54710     hebei          116.1667       37.8667           89       185     2012      02        11        042              0.073208      -0.823486       0.000000       0.220962   -9999.000000       0.080000       0.070000       0.018000
54710     54710     hebei          116.1667       37.8667           89       185     2012      02        12        043              0.079542       0.518341       0.000000       0.237173   -9999.000000       0.149100   -9999.000000   -9999.000000
54710     54710     hebei          116.1667       37.8667           89       185     2012      02        13        044              0.082292       0.762451       0.000000       0.246694       0.066000       0.246600   -9999.000000       0.064000
54710     54710     hebei          116.1667       37.8667           89       185     2012      02        14        045              0.086130       0.558167       0.000000       0.246889       0.074000   -9999.000000       0.057300       0.005000
54710     54710     hebei          116.1667       37.8667           89       185     2012      02        15        046              0.085917       0.485840       0.000000       0.243280       0.072000   -9999.000000       0.073800       0.058000
54710     54710     hebei          116.1667       37.8667           89       185     2012      02        16        047              0.082833       0.649689       0.000000       0.242906   -9999.000000       0.081500       0.059200       0.002000
54710     54710     hebei          116.1667       37.8667           89       185     2012      02        17        048              0.078708       0.124084       0.000000       0.237398   -9999.000000       0.109400       0.071300   -9999.000000
54710     54710     hebei          116.1667       37.8667           89       185     2012      02        18        049              0.077375      -0.791840       0.000000       0.225086       0.050000       0.112700   -9999.000000       0.043000
54710     54710     hebei          116.1667       37.8667           89       185     2012      02        19        050              0.079417      -0.113007       0.000000       0.229292       0.071000   -9999.000000       0.029400       0.008000
54710     54710     hebei          116.1667       37.8667           89       185     2012      02        20        051              0.086750       1.266449       0.000000       0.246293       0.079000   -9999.000000       0.070400       0.082000
54710     54710     hebei          116.1667       37.8667           89       185     2012      02        21        052              0.093292       2.547302       0.000000       0.266408       0.094000   -9999.000000   -9999.000000       0.032000
54710     54710     hebei          116.1667       37.8667           89       185     2012      02        22        053              0.097625       3.195282       0.000000       0.273352   -9999.000000   -9999.000000       0.067500   -9999.000000
54710     54710     hebei          116.1667       37.8667           89       185     2012      02        23        054              0.097625       2.223602       0.000000       0.270976       0.062000       0.078500       0.068500       0.097000
54710     54710     hebei          116.1667       37.8667           89       185     2012      02        24        055              0.095304       1.046722       0.000000       0.250410       0.084000   -9999.000000   -9999.000000       0.044000
54710     54710     hebei          116.1667       37.8667           89       185     2012      02        25        056              0.095542       0.771637       0.000000       0.244627       0.085000   -9999.000000       0.027700       0.017000
54710     54710     hebei          116.1667       37.8667           89       185     2012      02        26        057              0.098708       0.881927       0.184111       0.247860       0.091000       0.067900       0.069600   -9999.000000
54710     54710     hebei          116.1667       37.8667           89       185     2012      02        27        058              0.101833       2.406036       0.000000       0.263508   -9999.000000   -9999.000000   -9999.000000   -9999.000000
54710     54710     hebei          116.1667       37.8667           89       185     2012      02        28        059              0.113000       3.110504       0.000000       0.283166   -9999.000000       0.077200       0.065500       0.154000
54710     54710     hebei          116.1667       37.8667           89       185     2012      02        29        060              0.000000   -9999.000000       0.000000   -9999.000000       0.090000   -9999.000000   -9999.000000   -9999.000000
54710     54710     hebei          116.1667       37.8667           89       185     2012      03        01        061              0.143167       4.292206       0.224230       0.295154       0.088000       0.133800       0.042400       0.127000
54710     54710     hebei          116.1667       37.8667           89       185     2012      03        02        062              0.160667       3.792358       0.000000       0.288960       0.097000       0.105800       0.050700       0.015000
54710     54710     hebei          116.1667       37.8667           89       185     2012      03        03        063              0.168208       3.070862       0.000000       0.272194   -9999.000000   -9999.000000       0.068100       0.004000
54710     54710     hebei          116.1667       37.8667           89       185     2012      03        04        064              0.176333       2.582397       0.000000       0.270348   -9999.000000   -9999.000000       0.055600       0.001000
54710     54710     hebei          116.1667       37.8667           89       185     2012      03        05        065              0.173125       3.251617       0.000000       0.269963   -9999.000000       0.064300       0.079100       0.185000
54710     54710     hebei          116.1667       37.8667           89       185     2012      03        06        066              0.178667       2.376068       0.000000       0.271630       0.087000   -9999.000000   -9999.000000       0.131000
54710     54710     hebei          116.1667       37.8667           89       185     2012      03        07        067              0.000000       4.584625       0.000000       0.285220       0.094000   -9999.000000       0.028900   -9999.000000
54710     54710     hebei          116.1667       37.8667           89       185     2012      03        08        068              0.188167       6.043671       0.000000       0.291825       0.099000   -9999.000000       0.074700       0.075000
54710     54710     hebei          116.1667       37.8667           89       185     2012      03        09        069              0.186458       3.387573       0.000000       0.277185   -9999.000000   -9999.000000       0.060400       0.071000
54710     54710     hebei          116.1667       37.8667           89       185     2012      03        10        070              0.185292       3.692719       0.000000       0.276460       0.065000       0.094400       0.075200       0.206000
54710     54710     hebei          116.1667       37.8667           89       185     2012      03        11        071              0.182458       4.332428       0.000000       0.267915       0.095000   -9999.000000       0.071900       0.062000
54710     54710     hebei          116.1667       37.8667           89       185     2012      03        12        072              0.181458       2.781860       0.000000       0.258027       0.096000       0.157300       0.070200   -9999.000000
54710     54710     hebei          116.1667       37.8667           89       185     2012      03        13        073              0.183292       4.763275       0.000000       0.284355       0.102000       0.046100       0.031900       0.148000
54710     54710     hebei          116.1667       37.8667           89       185     2012      03        14        074              0.183125       8.324615       0.000000       0.294472   -9999.000000       0.054800       0.073500       0.117000
54710     54710     hebei          116.1667       37.8667           89       185     2012      03        15        075              0.181375       6.736084       0.000000       0.287462       0.114000       0.080800       0.060800       0.249000
54710     54710     hebei          116.1667       37.8667           89       185     2012      03        16        076              0.182625       6.683899       0.000000       0.294703       0.097500   -9999.000000       0.071700       0.118000
54710     54710     hebei          116.1667       37.8667           89       185     2012      03        17        077              0.183458       9.838165       0.214458       0.295174       0.092000   -9999.000000   -9999.000000   -9999.000000
54710     54710     hebei          116.1667       37.8667           89       185     2012      03        18        078              0.179667      11.049072       0.000000       0.292027       0.107000   -9999.000000       0.046800       0.455000
54710     54710     hebei          116.1667       37.8667           89       185     2012      03        19        079              0.178167       4.593719       0.000000       0.290156       0.109000   -9999.000000       0.080200       0.187000
54710     54710     hebei          116.1667       37.8667           89       185     2012      03        20        080              0.177167       5.519043       0.000000       0.294667   -9999.000000       0.192900       0.084900       0.233000
54710     54710     hebei          116.1667       37.8667           89       185     2012      03        21        081              0.177250       6.033447       0.000000       0.295588       0.114000   -9999.000000       0.072700       0.200000
54710     54710     hebei          116.1667       37.8667           89       185     2012      03        22        082              0.175583       7.751160       0.858695       0.294164   -9999.000000       0.078200       0.105800   -9999.000000
54710     54710     hebei          116.1667       37.8667           89       185     2012      03        23        083              0.175458       5.552429       0.000000       0.302070       0.113000       0.125300   -9999.000000       0.017000
54710     54710     hebei          116.1667       37.8667           89       185     2012      03        24        084              0.176833       8.195007       0.000000       0.296142   -9999.000000   -9999.000000   -9999.000000       0.208000
54710     54710     hebei          116.1667       37.8667           89       185     2012      03        25        085              0.000000      10.578186       0.000000       0.290758   -9999.000000       0.273100       0.081600       0.207000
54710     54710     hebei          116.1667       37.8667           89       185     2012      03        26        086              0.176042      10.897430       0.000000       0.286894       0.090500   -9999.000000       0.067800   -9999.000000
54710     54710     hebei          116.1667       37.8667           89       185     2012      03        27        087              0.176042      13.285187       0.000000       0.284991       0.101500   -9999.000000       0.075200   -9999.000000
54710     54710     hebei          116.1667       37.8667           89       185     2012      03        28        088              0.176083      15.070099       0.000000       0.281515       0.103000   -9999.000000       0.075400       0.105000
54710     54710     hebei          116.1667       37.8667           89       185     2012      03        29        089              0.176625      16.332214       0.099984       0.276937       0.108000   -9999.000000       0.076000       0.308000
54710     54710     hebei          116.1667       37.8667           89       185     2012      03        30        090              0.170333      16.725830       0.000000       0.273063       0.099000       0.147100       0.040700       0.247000
54710     54710     hebei          116.1667       37.8667           89       185     2012      03        31        091              0.166208      11.821503       0.541472       0.268578       0.089000   -9999.000000       0.079300       0.052000
54710     54710     hebei          116.1667       37.8667           89       185     2012      04        01        092              0.163333      11.971863       0.000000       0.268966       0.140500       0.275100       0.065900       0.132000
54710     54710     hebei          116.1667       37.8667           89       185     2012      04        02        093              0.157708      12.374115       0.000000       0.266915       0.134000   -9999.000000       0.089900       0.094000
54710     54710     hebei          116.1667       37.8667           89       185     2012      04        03        094              0.157875       6.706665       0.000000       0.273183       0.135000   -9999.000000   -9999.000000       0.293000
54710     54710     hebei          116.1667       37.8667           89       185     2012      04        04        095              0.158333      12.418091       0.000000       0.268682   -9999.000000   -9999.000000       0.038700       0.284000
54710     54710     hebei          116.1667       37.8667           89       185     2012      04        05        096              0.154958      15.078400       0.000000       0.260200       0.133000       0.164300       0.072800   -9999.000000
54710     54710     hebei          116.1667       37.8667           89       185     2012      04        06        097              0.153375      14.990936       0.000000       0.256044       0.126000   -9999.000000       0.089300       0.222000
54710     54710     hebei          116.1667       37.8667           89       185     2012      04        07        098              0.150917      16.200226       0.000000       0.251564       0.120000       0.362700       0.072100       0.238000
54710     54710     hebei          116.1667       37.8667           89       185     2012      04        08        099              0.148333      17.754578       0.000000       0.247752       0.119000   -9999.000000       0.079000       0.307000
54710     54710     hebei          116.1667       37.8667           89       185     2012      04        09        100              0.145625      18.325134       1.740192       0.240569       0.130000       0.142500   -9999.000000       0.256000
54710     54710     hebei          116.1667       37.8667           89       185     2012      04        10        101              0.141458      20.358459       1.791415       0.242023       0.156000       0.236700       0.080100   -9999.000000
54710     54710     hebei          116.1667       37.8667           89       185     2012      04        11        102              0.139217      16.503418       5.589489       0.277921       0.129000   -9999.000000       0.151700       0.298000
54710     54710     hebei          116.1667       37.8667           89       185     2012      04        12        103              0.139208      16.085388       0.461045       0.281341       0.181500   -9999.000000       0.096400       0.238000
54710     54710     hebei          116.1667       37.8667           89       185     2012      04        13        104              0.140125      15.828064       0.000000       0.294163       0.151000   -9999.000000       0.094200       0.367000
54710     54710     hebei          116.1667       37.8667           89       185     2012      04        14        105              0.138208      19.142639       0.000000       0.278076       0.158000       0.071700       0.092200       0.259000
54710     54710     hebei          116.1667       37.8667           89       185     2012      04        15        106              0.133708      20.207794       0.000000       0.266139       0.161000   -9999.000000       0.095600   -9999.000000
54710     54710     hebei          116.1667       37.8667           89       185     2012      04        16        107              0.128261      18.904785       0.000000       0.256256       0.127500   -9999.000000       0.053900       0.269000
54710     54710     hebei          116.1667       37.8667           89       185     2012      04        17        108              0.125417      17.412354       0.000000       0.249580       0.144500       0.240400   -9999.000000       0.213000
54710     54710     hebei          116.1667       37.8667           89       185     2012      04        18        109              0.123417      19.685059       0.000000       0.245878       0.136000       0.157200   -9999.000000       0.210000
54710     54710     hebei          116.1667       37.8667           89       185     2012      04        19        110              0.120542      20.945557       0.000000       0.241513       0.143000   -9999.000000       0.086400       0.224000
54710     54710     hebei          116.1667       37.8667           89       185     2012      04        20        111              0.116083      21.702698       0.000000       0.238426       0.196000   -9999.000000   -9999.000000   -9999.000000
54710     54710     hebei          116.1667       37.8667           89       185     2012      04        21        112              0.115625      17.317139       0.000000       0.244721       0.160500   -9999.000000       0.052700       0.116000
54710     54710     hebei          116.1667       37.8667           89       185     2012      04        22        113              0.113417      18.327667       0.000000       0.242835       0.165000   -9999.000000       0.098500       0.243000
54710     54710     hebei          116.1667       37.8667           89       185     2012      04        23        114              0.112583      22.517731       1.015234       0.237130       0.141000   -9999.000000       0.129000       0.245000
54710     54710     hebei          116.1667       37.8667           89       185     2012      04        24        115              0.243292      25.248169      30.781563       0.229548       0.367000       0.446500       0.220400       0.776000
54710     54710     hebei          116.1667       37.8667           89       185     2012      04        25        116              0.000000      15.974976       0.000000       0.368458   -9999.000000   -9999.000000       0.219700   -9999.000000
54710     54710     hebei          116.1667       37.8667           89       185     2012      04        26        117              0.251333      17.094055       0.000000       0.329398       0.262000   -9999.000000   -9999.000000       0.446000
54710     54710     hebei          116.1667       37.8667           89       185     2012      04        27        118              0.239417      20.454193       0.000000       0.312505       0.196000       0.344900   -9999.000000       0.354000
54710     54710     hebei          116.1667       37.8667           89       185     2012      04        28        119              0.223208      20.870880       0.000000       0.300442       0.147000       0.455100       0.156300       0.314000
54710     54710     hebei          116.1667       37.8667           89       185     2012      04        29        120              0.213458      17.358490       0.000000       0.291251       0.150000       0.340800       0.115700       0.181000
54710     54710     hebei          116.1667       37.8667           89       185     2012      04        30        121              0.205792      19.127014       0.000000       0.286398       0.200000       0.347400       0.115800       0.323000
54710     54710     hebei          116.1667       37.8667           89       185     2012      05        01        122              0.196167      22.812622       0.000000       0.281919       0.202000   -9999.000000       0.128000       0.228000
54710     54710     hebei          116.1667       37.8667           89       185     2012      05        02        123              0.185208      23.079803       0.000000       0.276038       0.156000       0.236800       0.110600       0.300000
54710     54710     hebei          116.1667       37.8667           89       185     2012      05        03        124              0.168792      24.901367       0.000000       0.269337       0.160000       0.147500       0.098700       0.342000
54710     54710     hebei          116.1667       37.8667           89       185     2012      05        04        125              0.149708      25.836334       0.000000       0.257490       0.133000   -9999.000000       0.132700   -9999.000000
54710     54710     hebei          116.1667       37.8667           89       185     2012      05        05        126              0.132625      26.305573       0.000000       0.245023       0.181000       0.186400       0.098400       0.256000
54710     54710     hebei          116.1667       37.8667           89       185     2012      05        06        127              0.119000      23.965668       0.000000       0.236633       0.180000   -9999.000000       0.111300       0.350000
54710     54710     hebei          116.1667       37.8667           89       185     2012      05        07        128              0.113708      27.253571       0.000000       0.227173   -9999.000000       0.125600   -9999.000000       0.439000
54710     54710     hebei          116.1667       37.8667           89       185     2012      05        08        129              0.105958      26.842651       0.000000       0.225483       0.155500       0.082500       0.059900       0.313000
54710     54710     hebei          116.1667       37.8667           89       185     2012      05        09        130              0.100208      25.052155       0.000000       0.216918       0.137000   -9999.000000       0.118000   -9999.000000
54710     54710     hebei          116.1667       37.8667           89       185     2012      05        10        131              0.098250      26.033997       0.000000       0.212669       0.146000   -9999.000000       0.097700       0.354000
54710     54710     hebei          116.1667       37.8667           89       185     2012      05        11        132              0.095667      26.657623       2.139563       0.212035       0.161000       0.190100       0.099200       0.354000
54710     54710     hebei          116.1667       37.8667           89       185     2012      05        12        133              0.094333      23.988586       0.207405       0.220788       0.206000       0.140700       0.114700       0.615000
54710     54710     hebei          116.1667       37.8667           89       185     2012      05        13        134              0.093667      20.497162       0.000000       0.246979       0.154500   -9999.000000   -9999.000000       0.341000
54710     54710     hebei          116.1667       37.8667           89       185     2012      05        14        135              0.091167      22.247559       0.000000       0.236744       0.126000   -9999.000000       0.074800   -9999.000000
54710     54710     hebei          116.1667       37.8667           89       185     2012      05        15        136              0.087833      23.395111       0.000000       0.221136       0.128000       0.116100       0.129600       0.384000
54710     54710     hebei          116.1667       37.8667           89       185     2012      05        16        137              0.085292      23.390442       0.000000       0.209436       0.158000       0.180800       0.099700       0.422000
54710     54710     hebei          116.1667       37.8667           89       185     2012      05        17        138              0.083000      23.989105       0.000000       0.202163       0.167000       0.123000       0.116200       0.414000
54710     54710     hebei          116.1667       37.8667           89       185     2012      05        18        139              0.084059      27.378998       0.000000       0.196848       0.150000       0.243500   -9999.000000       0.328000
54710     54710     hebei          116.1667       37.8667           89       185     2012      05        19        140              0.083167      28.213837       0.000000       0.195753       0.136000   -9999.000000       0.101400   -9999.000000
54710     54710     hebei          116.1667       37.8667           89       185     2012      05        20        141              0.081708      29.322906      11.837843       0.193871       0.136000   -9999.000000       0.119600       0.519000
54710     54710     hebei          116.1667       37.8667           89       185     2012      05        21        142              0.080292      27.165192       0.000000       0.281257       0.136000       0.258700       0.136400       0.561000
54710     54710     hebei          116.1667       37.8667           89       185     2012      05        22        143              0.079292      24.886627       0.000000       0.262107       0.155000   -9999.000000       0.111400       0.451000
54710     54710     hebei          116.1667       37.8667           89       185     2012      05        23        144              0.079083      24.194336       0.000000       0.247061   -9999.000000       0.304200       0.120200       0.333000
54710     54710     hebei          116.1667       37.8667           89       185     2012      05        24        145              0.078333      26.134369       0.000000       0.235338       0.109000       0.349100   -9999.000000   -9999.000000
54710     54710     hebei          116.1667       37.8667           89       185     2012      05        25        146              0.000000      26.105011       2.898273       0.222563       0.106000       0.317400       0.085600       0.537000
54710     54710     hebei          116.1667       37.8667           89       185     2012      05        26        147              0.077375      26.274628       0.000000       0.235183       0.132000   -9999.000000       0.127200       0.482000
54710     54710     hebei          116.1667       37.8667           89       185     2012      05        27        148              0.078750      27.976532       0.000000       0.225238       0.138000   -9999.000000       0.102300       0.585000
54710     54710     hebei          116.1667       37.8667           89       185     2012      05        28        149              0.078958      30.025635       0.000000       0.209371       0.107500       0.299400       0.100600       0.299000
54710     54710     hebei          116.1667       37.8667           89       185     2012      05        29        150              0.075375      30.094299       0.000000       0.200124       0.121000       0.325100       0.115500       0.311000
54710     54710     hebei          116.1667       37.8667           89       185     2012      05        30        151              0.075375      23.864899       0.000000       0.201895       0.106000   -9999.000000       0.117300   -9999.000000
54710     54710     hebei          116.1667       37.8667           89       185     2012      05        31        152              0.074792      26.145203       0.164359       0.195729       0.113000   -9999.000000   -9999.000000   -9999.000000
54710     54710     hebei          116.1667       37.8667           89       185     2012      06        01        153              0.074000      27.002380       0.000000       0.192308       0.116000   -9999.000000       0.128300       0.540000
54710     54710     hebei          116.1667       37.8667           89       185     2012      06        02        154              0.074375      25.474091       0.000000       0.196977       0.108000       0.076700       0.100600   -9999.000000
54710     54710     hebei          116.1667       37.8667           89       185     2012      06        03        155              0.074000      27.870483       0.000000       0.195789       0.105500       0.188800       0.119400       0.457000
54710     54710     hebei          116.1667       37.8667           89       185     2012      06        04        156              0.074292      27.332367       0.000000       0.193101       0.083000       0.273600   -9999.000000       0.536000
54710     54710     hebei          116.1667       37.8667           89       185     2012      06        05        157              0.074375      30.702881       0.000000       0.188754       0.084000       0.221300       0.080700       0.666000
54710     54710     hebei          116.1667       37.8667           89       185     2012      06        06        158              0.073375      31.743927       6.685526       0.185994       0.129000   -9999.000000       0.113900       0.532000
54710     54710     hebei          116.1667       37.8667           89       185     2012      06        07        159              0.081250      28.759216      14.889046       0.197214       0.147000       0.077500       0.162300   -9999.000000
54710     54710     hebei          116.1667       37.8667           89       185     2012      06        08        160              0.110875      28.960999       0.000000       0.281383       0.113000       0.157200       0.118900       0.822000
54710     54710     hebei          116.1667       37.8667           89       185     2012      06        09        161              0.115417      28.270203       4.752503       0.282368       0.112500   -9999.000000       0.117400       0.527000
54710     54710     hebei          116.1667       37.8667           89       185     2012      06        10        162              0.110261      29.376862       0.000000       0.263112       0.097000       0.177300   -9999.000000       0.582000
54710     54710     hebei          116.1667       37.8667           89       185     2012      06        11        163              0.000000      24.193268       0.000000       0.252649       0.082000       0.110000       0.067200       0.462000
54710     54710     hebei          116.1667       37.8667           89       185     2012      06        12        164              0.100708      27.452454       0.000000       0.228468       0.085000   -9999.000000       0.118600   -9999.000000
54710     54710     hebei          116.1667       37.8667           89       185     2012      06        13        165              0.099000      29.148346       0.506423       0.211337       0.071500       0.107200       0.108500       0.580000
54710     54710     hebei          116.1667       37.8667           89       185     2012      06        14        166              0.095429      29.433960       0.000000       0.203689       0.080000   -9999.000000       0.126100       0.517000
54710     54710     hebei          116.1667       37.8667           89       185     2012      06        15        167              0.092125      27.598114       0.000000       0.202304       0.081000   -9999.000000       0.128200       0.530000
54710     54710     hebei          116.1667       37.8667           89       185     2012      06        16        168              0.090875      28.333313       0.000000       0.195499       0.089000       0.169500       0.123700       0.532000
54710     54710     hebei          116.1667       37.8667           89       185     2012      06        17        169              0.089792      31.559113       0.000000       0.189704       0.091000       0.067200       0.076800   -9999.000000
54710     54710     hebei          116.1667       37.8667           89       185     2012      06        18        170              0.088167      33.204712       0.000000       0.187451       0.073000   -9999.000000       0.103800       0.494000
54710     54710     hebei          116.1667       37.8667           89       185     2012      06        19        171              0.086625      33.052216       0.000000       0.186110       0.093000   -9999.000000       0.104500   -9999.000000
54710     54710     hebei          116.1667       37.8667           89       185     2012      06        20        172              0.085250      33.894531       1.402998       0.185734       0.092000   -9999.000000       0.115600       0.618000
54710     54710     hebei          116.1667       37.8667           89       185     2012      06        21        173              0.085958      32.846619       9.953530       0.186632       0.098000   -9999.000000   -9999.000000       0.528000
54710     54710     hebei          116.1667       37.8667           89       185     2012      06        22        174              0.093625      32.917999       0.499970       0.244385       0.090000   -9999.000000       0.076400   -9999.000000
54710     54710     hebei          116.1667       37.8667           89       185     2012      06        23        175              0.096917      30.552216       1.043207       0.267646       0.106000   -9999.000000       0.106800       0.674000
54710     54710     hebei          116.1667       37.8667           89       185     2012      06        24        176              0.097083      30.187378       1.228498       0.244079       0.109000   -9999.000000       0.120100   -9999.000000
54710     54710     hebei          116.1667       37.8667           89       185     2012      06        25        177              0.096417      29.973724       0.000000       0.226948       0.107000       0.244600       0.138900       0.693000
54710     54710     hebei          116.1667       37.8667           89       185     2012      06        26        178              0.095292      30.329712       0.000000       0.216195       0.109000       0.231600       0.148000       0.573000
54710     54710     hebei          116.1667       37.8667           89       185     2012      06        27        179              0.092333      29.727997       0.417114       0.204962       0.095000   -9999.000000   -9999.000000       0.707000
54710     54710     hebei          116.1667       37.8667           89       185     2012      06        28        180              0.094208      30.048584      23.690737       0.199566       0.133000       0.282400       0.079100       0.979000
54710     54710     hebei          116.1667       37.8667           89       185     2012      06        29        181              0.220083      26.012329      18.137438       0.287986       0.126000       0.225200       0.161400       1.000000
54710     54710     hebei          116.1667       37.8667           89       185     2012      06        30        182              0.215500      24.072174       0.152885       0.364067       0.111000   -9999.000000       0.153900   -9999.000000
54710     54710     hebei          116.1667       37.8667           89       185     2012      07        01        183              0.204333      27.548737       0.000000       0.328132       0.121000   -9999.000000       0.148500   -9999.000000
54710     54710     hebei          116.1667       37.8667           89       185     2012      07        02        184              0.189583      30.067078       0.000000       0.306587       0.108000   -9999.000000       0.137800       0.881000
54710     54710     hebei          116.1667       37.8667           89       185     2012      07        03        185              0.174833      30.336182       0.323491       0.290703       0.111000       0.160600       0.127000       0.709000
54710     54710     hebei          116.1667       37.8667           89       185     2012      07        04        186              0.162000      32.015961       8.657074       0.275840       0.106000       0.092300       0.105400   -9999.000000
54710     54710     hebei          116.1667       37.8667           89       185     2012      07        05        187              0.153042      29.140961       0.316980       0.306628       0.128000       0.262400       0.139700       0.889000
54710     54710     hebei          116.1667       37.8667           89       185     2012      07        06        188              0.141750      28.823059       0.000000       0.300479   -9999.000000   -9999.000000       0.121600   -9999.000000
54710     54710     hebei          116.1667       37.8667           89       185     2012      07        07        189              0.131083      29.916290       7.710197       0.282839   -9999.000000   -9999.000000       0.121600       0.876000
54710     54710     hebei          116.1667       37.8667           89       185     2012      07        08        190              0.138333      30.113586       3.229991       0.300871       0.131000       0.128900   -9999.000000       0.994000
54710     54710     hebei          116.1667       37.8667           89       185     2012      07        09        191              0.141167      29.032166      10.104337       0.316354   -9999.000000       0.200800       0.116500       0.944000
54710     54710     hebei          116.1667       37.8667           89       185     2012      07        10        192              0.173917      28.235199      19.508049       0.328942       0.127000   -9999.000000       0.187400       1.000000
54710     54710     hebei          116.1667       37.8667           89       185     2012      07        11        193              0.208167      28.087952       0.000000       0.374158       0.143000       0.210100       0.161100   -9999.000000
54710     54710     hebei          116.1667       37.8667           89       185     2012      07        12        194              0.190792      30.592621       0.075777       0.344899       0.138000   -9999.000000       0.149900       0.958000
54710     54710     hebei          116.1667       37.8667           89       185     2012      07        13        195              0.171458      30.111115       0.000000       0.324935       0.145000   -9999.000000       0.154000       0.843000
54710     54710     hebei          116.1667       37.8667           89       185     2012      07        14        196              0.163083      27.965546       1.555791       0.312493       0.166000       0.472000   -9999.000000       0.965000
54710     54710     hebei          116.1667       37.8667           89       185     2012      07        15        197              0.148875      25.411743       0.000000       0.316817       0.122000       0.200900       0.092100       0.883000
54710     54710     hebei          116.1667       37.8667           89       185     2012      07        16        198              0.131917      28.512634       0.000000       0.301311       0.130000       0.119500       0.177800   -9999.000000
54710     54710     hebei          116.1667       37.8667           89       185     2012      07        17        199              0.119125      29.088623       0.000000       0.288252       0.107000   -9999.000000       0.136600       0.695000
54710     54710     hebei          116.1667       37.8667           89       185     2012      07        18        200              0.111875      29.493439       0.000000       0.276529       0.123000   -9999.000000       0.153800       0.833000
54710     54710     hebei          116.1667       37.8667           89       185     2012      07        19        201              0.105875      29.891602       0.000000       0.267337       0.129000       0.117500   -9999.000000       0.710000
54710     54710     hebei          116.1667       37.8667           89       185     2012      07        20        202              0.101087      30.850189       0.060514       0.257128       0.099000       0.122700       0.128500       0.780000
54710     54710     hebei          116.1667       37.8667           89       185     2012      07        21        203              0.109875      31.338776      39.494877       0.249629       0.184000   -9999.000000       0.167000   -9999.000000
54710     54710     hebei          116.1667       37.8667           89       185     2012      07        22        204              0.198458      30.880737       2.665326       0.314940       0.167000       0.238200       0.208500       0.973000
54710     54710     hebei          116.1667       37.8667           89       185     2012      07        23        205              0.180958      28.505310       0.000000       0.375108       0.160000       0.248900       0.151000   -9999.000000
54710     54710     hebei          116.1667       37.8667           89       185     2012      07        24        206              0.162333      29.535156      12.942016       0.325876       0.215000       0.235300       0.166200       0.943000
54710     54710     hebei          116.1667       37.8667           89       185     2012      07        25        207              0.257500      30.802734      12.911485       0.325616       0.227000   -9999.000000   -9999.000000       1.000000
54710     54710     hebei          116.1667       37.8667           89       185     2012      07        26        208              0.285042      30.218781      63.418324       0.374970       0.199000       0.144200       0.133500       0.995000
54710     54710     hebei          116.1667       37.8667           89       185     2012      07        27        209              0.285000      29.272339       3.161259       0.429397       0.194000   -9999.000000       0.202500       0.976000
54710     54710     hebei          116.1667       37.8667           89       185     2012      07        28        210              0.270375      30.016785       0.000000       0.384121       0.178000       0.240100       0.154900       0.945000
54710     54710     hebei          116.1667       37.8667           89       185     2012      07        29        211              0.255083      32.039215       0.000000       0.362473       0.214000       0.256800       0.143900       0.897000
54710     54710     hebei          116.1667       37.8667           89       185     2012      07        30        212              0.276750      31.380768      54.879578       0.350347       0.271000   -9999.000000       0.124000   -9999.000000
54710     54710     hebei          116.1667       37.8667           89       185     2012      07        31        213              0.305167      27.555328      53.194115       0.412080   -9999.000000       0.369100   -9999.000000       1.000000
54710     54710     hebei          116.1667       37.8667           89       185     2012      08        01        214              0.300333      24.648712       4.837785       0.415580       0.361000       0.325300       0.090000       0.951000
54710     54710     hebei          116.1667       37.8667           89       185     2012      08        02        215              0.287167      23.992340       0.000000       0.396035       0.257000       0.337300       0.131600       0.927000
54710     54710     hebei          116.1667       37.8667           89       185     2012      08        03        216              0.285333      27.264832       0.769757       0.373551       0.324000       0.299900       0.120200       0.909000
54710     54710     hebei          116.1667       37.8667           89       185     2012      08        04        217              0.281583      26.238525      15.467302       0.367570   -9999.000000   -9999.000000       0.128800   -9999.000000
54710     54710     hebei          116.1667       37.8667           89       185     2012      08        05        218              0.291917      27.922729       0.369463       0.373308       0.371000   -9999.000000   -9999.000000       0.975000
54710     54710     hebei          116.1667       37.8667           89       185     2012      08        06        219              0.285833      26.828217       0.000000       0.375151       0.317500       0.200800       0.099200       0.894000
54710     54710     hebei          116.1667       37.8667           89       185     2012      08        07        220              0.278417      28.749084       0.000000       0.361107       0.235000       0.340100   -9999.000000       0.863000
54710     54710     hebei          116.1667       37.8667           89       185     2012      08        08        221              0.269708      29.938690       9.636225       0.352041       0.242000       0.365700       0.112300       0.864000
54710     54710     hebei          116.1667       37.8667           89       185     2012      08        09        222              0.260583      30.388153       1.278412       0.353112       0.337000       0.154200       0.093200   -9999.000000
54710     54710     hebei          116.1667       37.8667           89       185     2012      08        10        223              0.252083      27.849670       0.000000       0.351707       0.342000       0.341100       0.105800       0.823000
54710     54710     hebei          116.1667       37.8667           89       185     2012      08        11        224              0.243875      28.840759       6.924785       0.342545       0.161000   -9999.000000   -9999.000000       0.823000
54710     54710     hebei          116.1667       37.8667           89       185     2012      08        12        225              0.273833      29.454803      12.917880       0.344032       0.341500   -9999.000000       0.068800       1.000000
54710     54710     hebei          116.1667       37.8667           89       185     2012      08        13        226              0.265208      24.544342       0.000000       0.377333       0.228000       0.221600       0.191400       0.838000
54710     54710     hebei          116.1667       37.8667           89       185     2012      08        14        227              0.259625      25.577179       4.601467       0.353539   -9999.000000       0.386100       0.170600   -9999.000000
54710     54710     hebei          116.1667       37.8667           89       185     2012      08        15        228              0.255042      22.257538       0.000000       0.357974       0.362000       0.314400       0.157600       0.905000
54710     54710     hebei          116.1667       37.8667           89       185     2012      08        16        229              0.246913      25.760620       0.000000       0.347528       0.243000       0.123000       0.170100       0.773000
54710     54710     hebei          116.1667       37.8667           89       185     2012      08        17        230              0.239125      27.146942       2.462306       0.339876       0.296500   -9999.000000       0.188000       0.819000
54710     54710     hebei          116.1667       37.8667           89       185     2012      08        18        231              0.262333      26.803986      17.882601       0.340371       0.336000       0.300600       0.124900       0.954000
54710     54710     hebei          116.1667       37.8667           89       185     2012      08        19        232              0.271417      25.412659       0.000000       0.374468       0.244000       0.194000       0.203400   -9999.000000
54710     54710     hebei          116.1667       37.8667           89       185     2012      08        20        233              0.262875      27.801758       3.676492       0.357875       0.290000   -9999.000000       0.213000       0.873000
54710     54710     hebei          116.1667       37.8667           89       185     2012      08        21        234              0.256667      27.806427       0.000000       0.352179       0.439000       0.293700       0.223600       0.801000
54710     54710     hebei          116.1667       37.8667           89       185     2012      08        22        235              0.243875      24.236847       0.000000       0.348819       0.314500   -9999.000000   -9999.000000   -9999.000000
54710     54710     hebei          116.1667       37.8667           89       185     2012      08        23        236              0.230417      24.395905       0.000000       0.338451       0.314500       0.178100       0.152400       0.861000
54710     54710     hebei          116.1667       37.8667           89       185     2012      08        24        237              0.214750      24.345001       0.000000       0.332565       0.248000   -9999.000000       0.226600       0.806000
54710     54710     hebei          116.1667       37.8667           89       185     2012      08        25        238              0.000000      24.496582       0.000000       0.326368   -9999.000000   -9999.000000       0.241200       0.725000
54710     54710     hebei          116.1667       37.8667           89       185     2012      08        26        239              0.188542      26.228577       0.000000       0.322044       0.348000   -9999.000000       0.194900       0.745000
54710     54710     hebei          116.1667       37.8667           89       185     2012      08        27        240              0.186542      27.074432       1.551066       0.320341       0.385000       0.168700       0.172500       0.778000
54710     54710     hebei          116.1667       37.8667           89       185     2012      08        28        241              0.181917      26.234650       1.234176       0.326959       0.327500       0.100200   -9999.000000   -9999.000000
54710     54710     hebei          116.1667       37.8667           89       185     2012      08        29        242              0.168542      27.662781       0.000000       0.319861       0.230000   -9999.000000       0.106200       0.801000
54710     54710     hebei          116.1667       37.8667           89       185     2012      08        30        243              0.155083      29.255463       0.000000       0.313061       0.292000   -9999.000000       0.188100       0.831000
54710     54710     hebei          116.1667       37.8667           89       185     2012      08        31        244              0.143542      29.740417       0.000000       0.308057       0.363000       0.115100       0.145900       0.779000
54710     54710     hebei          116.1667       37.8667           89       185     2012      09        01        245              0.135208      29.092865      12.441337       0.304333       0.299000   -9999.000000       0.162300       0.751000
54710     54710     hebei          116.1667       37.8667           89       185     2012      09        02        246              0.134250      28.426941       2.650028       0.313323       0.350500       0.151400       0.172200   -9999.000000
54710     54710     hebei          116.1667       37.8667           89       185     2012      09        03        247              0.131083      23.432129       0.000000       0.349414       0.222000       0.197200       0.197700       0.837000
54710     54710     hebei          116.1667       37.8667           89       185     2012      09        04        248              0.121917      23.053162       0.000000       0.327159       0.216000   -9999.000000       0.124800       0.709000
54710     54710     hebei          116.1667       37.8667           89       185     2012      09        05        249              0.116333      22.353485      26.356150       0.317601   -9999.000000       0.116200       0.204500       0.722000
54710     54710     hebei          116.1667       37.8667           89       185     2012      09        06        250              0.176833      20.293030      35.164539       0.345753       0.322000       0.199400       0.184700       0.997000
54710     54710     hebei          116.1667       37.8667           89       185     2012      09        07        251              0.267750      21.471100       0.252198       0.398274       0.310500   -9999.000000       0.202000   -9999.000000
54710     54710     hebei          116.1667       37.8667           89       185     2012      09        08        252              0.261125      22.563049       0.000000       0.380593       0.344500       0.404100   -9999.000000       0.909000
54710     54710     hebei          116.1667       37.8667           89       185     2012      09        09        253              0.255208      22.197784       0.000000       0.366462       0.251000   -9999.000000       0.125600       0.837000
54710     54710     hebei          116.1667       37.8667           89       185     2012      09        10        254              0.251500      24.144867       1.748428       0.357132       0.271000       0.363900       0.203200       0.834000
54710     54710     hebei          116.1667       37.8667           89       185     2012      09        11        255              0.248833      24.776276       0.153028       0.352329       0.258000   -9999.000000       0.204900       0.866000
54710     54710     hebei          116.1667       37.8667           89       185     2012      09        12        256              0.244333      22.650757       0.112018       0.351723       0.142000   -9999.000000       0.178300   -9999.000000
54710     54710     hebei          116.1667       37.8667           89       185     2012      09        13        257              0.234917      20.966003       0.000000       0.345572       0.211500       0.373100       0.193400       0.801000
54710     54710     hebei          116.1667       37.8667           89       185     2012      09        14        258              0.226125      21.278595       0.000000       0.339225       0.164000       0.227900   -9999.000000       0.723000
54710     54710     hebei          116.1667       37.8667           89       185     2012      09        15        259              0.217500      20.594299       0.000000       0.334089   -9999.000000       0.170400       0.119300       0.799000
54710     54710     hebei          116.1667       37.8667           89       185     2012      09        16        260              0.209542      21.124542       0.000000       0.330048       0.255000       0.119500       0.208300       0.772000
54710     54710     hebei          116.1667       37.8667           89       185     2012      09        17        261              0.200333      21.126007       0.000000       0.326636       0.260000   -9999.000000       0.148900   -9999.000000
54710     54710     hebei          116.1667       37.8667           89       185     2012      09        18        262              0.191542      21.614227       0.000000       0.322878       0.201000   -9999.000000       0.161600       0.707000
54710     54710     hebei          116.1667       37.8667           89       185     2012      09        19        263              0.182958      22.217133       0.000000       0.319732       0.216000   -9999.000000       0.160000       0.722000
54710     54710     hebei          116.1667       37.8667           89       185     2012      09        20        264              0.173000      22.778107       0.000000       0.316278       0.164000       0.240900       0.169400       0.707000
54710     54710     hebei          116.1667       37.8667           89       185     2012      09        21        265              0.179083      23.299988      10.316483       0.314061   -9999.000000   -9999.000000       0.140000       0.779000
54710     54710     hebei          116.1667       37.8667           89       185     2012      09        22        266              0.233750      22.334961       0.279231       0.329909       0.223000   -9999.000000       0.190100       0.913000
54710     54710     hebei          116.1667       37.8667           89       185     2012      09        23        267              0.224750      22.298157       0.000000       0.343721       0.151500       0.136300       0.153600       0.830000
54710     54710     hebei          116.1667       37.8667           89       185     2012      09        24        268              0.217583      22.907013       0.312911       0.331719       0.177000       0.266500       0.166300       0.837000
54710     54710     hebei          116.1667       37.8667           89       185     2012      09        25        269              0.253125      23.040955      34.870636       0.327066       0.155000   -9999.000000   -9999.000000       0.979000
54710     54710     hebei          116.1667       37.8667           89       185     2012      09        26        270              0.289583      23.114838       0.115923       0.374932       0.188000       0.319700       0.101700   -9999.000000
54710     54710     hebei          116.1667       37.8667           89       185     2012      09        27        271              0.284571      21.580597       5.270977       0.370667   -9999.000000   -9999.000000       0.184400       0.879000
54710     54710     hebei          116.1667       37.8667           89       185     2012      09        28        272              0.273200      19.734863       0.000000       0.365708   -9999.000000   -9999.000000       0.146900       0.749000
54710     54710     hebei          116.1667       37.8667           89       185     2012      09        29        273              0.270792      17.254791       0.000000       0.353425       0.160000   -9999.000000       0.153900       0.892000
54710     54710     hebei          116.1667       37.8667           89       185     2012      09        30        274              0.269000      17.559937       0.000000       0.346718       0.149000   -9999.000000       0.175900       0.763000
54710     54710     hebei          116.1667       37.8667           89       185     2012      10        01        275              0.269417      17.864868       0.000000       0.342177       0.102000       0.157100   -9999.000000   -9999.000000
54710     54710     hebei          116.1667       37.8667           89       185     2012      10        02        276              0.265833      19.062408       0.000000       0.338236       0.133000       0.281100       0.091900       0.795000
54710     54710     hebei          116.1667       37.8667           89       185     2012      10        03        277              0.259792      20.068207       0.000000       0.335112       0.130000       0.162100       0.153800       0.672000
54710     54710     hebei          116.1667       37.8667           89       185     2012      10        04        278              0.255625      19.032898       0.000000       0.331983       0.110500       0.187800       0.145100       0.784000
54710     54710     hebei          116.1667       37.8667           89       185     2012      10        05        279              0.252917      19.352325       0.000000       0.329877       0.123500   -9999.000000       0.149800       0.667000
54710     54710     hebei          116.1667       37.8667           89       185     2012      10        06        280              0.250000      19.341248       0.000000       0.328368       0.118000       0.118100   -9999.000000   -9999.000000
54710     54710     hebei          116.1667       37.8667           89       185     2012      10        07        281              0.248208      19.861572       0.000000       0.326276       0.134000       0.373200       0.119200       0.732000
54710     54710     hebei          116.1667       37.8667           89       185     2012      10        08        282              0.244917      20.229889       0.346193       0.324440       0.138000   -9999.000000       0.120400       0.567000
54710     54710     hebei          116.1667       37.8667           89       185     2012      10        09        283              0.239500      20.717102       0.000000       0.323855       0.109500   -9999.000000       0.136600       0.753000
54710     54710     hebei          116.1667       37.8667           89       185     2012      10        10        284              0.230833      18.099487       0.000000       0.320511       0.122500   -9999.000000       0.131800       0.547000
54710     54710     hebei          116.1667       37.8667           89       185     2012      10        11        285              0.225875      16.261139       0.000000       0.318006       0.098000   -9999.000000       0.149800   -9999.000000
54710     54710     hebei          116.1667       37.8667           89       185     2012      10        12        286              0.224667      17.047852       0.000000       0.316830       0.105000       0.234600   -9999.000000       0.524000
54710     54710     hebei          116.1667       37.8667           89       185     2012      10        13        287              0.228667      18.654938       0.000000       0.316599       0.116000   -9999.000000       0.071300       0.463000
54710     54710     hebei          116.1667       37.8667           89       185     2012      10        14        288              0.220917      16.085815       0.000000       0.313876       0.122000       0.226300       0.141100       0.635000
54710     54710     hebei          116.1667       37.8667           89       185     2012      10        15        289              0.216875      16.373383       0.000000       0.313373       0.105000   -9999.000000       0.096500       0.475000
54710     54710     hebei          116.1667       37.8667           89       185     2012      10        16        290              0.218500      17.104156       4.465260       0.315617       0.115000       0.361000       0.129300   -9999.000000
54710     54710     hebei          116.1667       37.8667           89       185     2012      10        17        291              0.216833      13.794952       0.000000       0.334793       0.097000       0.244500       0.115100       0.426000
54710     54710     hebei          116.1667       37.8667           89       185     2012      10        18        292              0.214167      13.278229       0.000000       0.323813       0.130000       0.274400       0.114400   -9999.000000
54710     54710     hebei          116.1667       37.8667           89       185     2012      10        19        293              0.211083      14.777496       0.177594       0.321652       0.125000       0.447500       0.064700       0.457000
54710     54710     hebei          116.1667       37.8667           89       185     2012      10        20        294              0.209125      15.555756       0.000000       0.320671       0.099500   -9999.000000       0.118700       0.460000
54710     54710     hebei          116.1667       37.8667           89       185     2012      10        21        295              0.211417      17.102142       6.230576       0.319744       0.123000       0.332600       0.137200       0.541000
54710     54710     hebei          116.1667       37.8667           89       185     2012      10        22        296              0.216583      13.796204       0.000000       0.338154   -9999.000000   -9999.000000       0.113000       0.433000
54710     54710     hebei          116.1667       37.8667           89       185     2012      10        23        297              0.212875      13.165924       0.375386       0.331834   -9999.000000   -9999.000000   -9999.000000       0.632000
54710     54710     hebei          116.1667       37.8667           89       185     2012      10        24        298              0.211500      13.887146       0.000000       0.327896   -9999.000000       0.200800       0.065700       0.539000
54710     54710     hebei          116.1667       37.8667           89       185     2012      10        25        299              0.000000      15.199646       0.000000       0.325762       0.117000   -9999.000000       0.087900   -9999.000000
54710     54710     hebei          116.1667       37.8667           89       185     2012      10        26        300              0.211083      15.955994       1.169510       0.324051       0.121000       0.290400       0.126500       0.528000
54710     54710     hebei          116.1667       37.8667           89       185     2012      10        27        301              0.210958      16.730164       0.000000       0.326604       0.097000       0.074200       0.092800       0.449000
54710     54710     hebei          116.1667       37.8667           89       185     2012      10        28        302              0.000000      15.277405       0.000000       0.325362       0.101000   -9999.000000       0.111600       0.575000
54710     54710     hebei          116.1667       37.8667           89       185     2012      10        29        303              0.200958      14.342041       0.000000       0.322914   -9999.000000   -9999.000000   -9999.000000       0.467000
54710     54710     hebei          116.1667       37.8667           89       185     2012      10        30        304              0.193958      12.832947       0.000000       0.322153   -9999.000000   -9999.000000       0.045000   -9999.000000
54710     54710     hebei          116.1667       37.8667           89       185     2012      10        31        305              0.189167      10.806305       0.000000       0.320286       0.075000       0.220900       0.099500       0.505000
54710     54710     hebei          116.1667       37.8667           89       185     2012      11        01        306              0.184708      10.117676       0.000000       0.319335       0.115000   -9999.000000       0.080200       0.428000
54710     54710     hebei          116.1667       37.8667           89       185     2012      11        02        307              0.186167      11.037415       0.000000       0.319644       0.108000   -9999.000000       0.101100       0.570000
54710     54710     hebei          116.1667       37.8667           89       185     2012      11        03        308              0.207625      12.328156       8.436608       0.318956       0.156000   -9999.000000       0.130800       0.794000
54710     54710     hebei          116.1667       37.8667           89       185     2012      11        04        309              0.238833       8.610748       2.369118       0.343043   -9999.000000       0.179000       0.132800   -9999.000000
54710     54710     hebei          116.1667       37.8667           89       185     2012      11        05        310              0.232958       5.226685       0.000000       0.346096       0.146000   -9999.000000       0.072200       0.790000
54710     54710     hebei          116.1667       37.8667           89       185     2012      11        06        311              0.226375       7.628052       0.000000       0.337100       0.154000   -9999.000000       0.112700       0.479000
54710     54710     hebei          116.1667       37.8667           89       185     2012      11        07        312              0.221917       9.012115       0.000000       0.333926       0.141000       0.253500       0.102700       0.645000
54710     54710     hebei          116.1667       37.8667           89       185     2012      11        08        313              0.218542       9.182739       0.000000       0.332768       0.140000   -9999.000000   -9999.000000       0.480000
54710     54710     hebei          116.1667       37.8667           89       185     2012      11        09        314              0.217542       9.188232       1.360275       0.330856       0.155000       0.349600   -9999.000000   -9999.000000
54710     54710     hebei          116.1667       37.8667           89       185     2012      11        10        315              0.229583      10.516144       8.572326       0.332390   -9999.000000   -9999.000000       0.051700       0.790000
54710     54710     hebei          116.1667       37.8667           89       185     2012      11        11        316              0.226917       7.201691       0.000000       0.357535       0.143000   -9999.000000       0.109500       0.425000
54710     54710     hebei          116.1667       37.8667           89       185     2012      11        12        317              0.220750       5.170685       0.000000       0.342760       0.145000   -9999.000000       0.104900       0.597000
54710     54710     hebei          116.1667       37.8667           89       185     2012      11        13        318              0.000000       5.937164       0.000000       0.338754       0.137000       0.367900       0.102200       0.294000
54710     54710     hebei          116.1667       37.8667           89       185     2012      11        14        319              0.212667       4.509857       0.000000       0.328105   -9999.000000   -9999.000000       0.121700   -9999.000000
54710     54710     hebei          116.1667       37.8667           89       185     2012      11        15        320              0.212250       3.983765       1.586374       0.327181   -9999.000000   -9999.000000   -9999.000000       0.436000
54710     54710     hebei          116.1667       37.8667           89       185     2012      11        16        321              0.215583       5.444305       0.000000       0.336167       0.117000       0.167400       0.049900   -9999.000000
54710     54710     hebei          116.1667       37.8667           89       185     2012      11        17        322              0.000000       5.060516       0.000000       0.336460       0.141000   -9999.000000       0.114600       0.441000
54710     54710     hebei          116.1667       37.8667           89       185     2012      11        18        323              0.212833       6.339935       0.000000       0.335090       0.131000   -9999.000000       0.083800   -9999.000000
54710     54710     hebei          116.1667       37.8667           89       185     2012      11        19        324              0.209833       5.633453       0.000000       0.333395       0.135000   -9999.000000       0.119300       0.421000
54710     54710     hebei          116.1667       37.8667           89       185     2012      11        20        325              0.209125       4.816071       0.000000       0.332334   -9999.000000   -9999.000000   -9999.000000       0.363000
54710     54710     hebei          116.1667       37.8667           89       185     2012      11        21        326              0.209042       4.829559       0.000000       0.332862   -9999.000000   -9999.000000       0.086000       0.510000
54710     54710     hebei          116.1667       37.8667           89       185     2012      11        22        327              0.206125       6.031342       0.000000       0.332724   -9999.000000       0.207400       0.079300       0.374000
54710     54710     hebei          116.1667       37.8667           89       185     2012      11        23        328              0.202625       3.918152       0.000000       0.325437       0.125000   -9999.000000       0.108300   -9999.000000
54710     54710     hebei          116.1667       37.8667           89       185     2012      11        24        329              0.200833       2.768707       0.000000       0.312808       0.126000       0.253700       0.093000       0.344000
54710     54710     hebei          116.1667       37.8667           89       185     2012      11        25        330              0.201958       3.745026       0.000000       0.327944   -9999.000000   -9999.000000       0.112600       0.303000
54710     54710     hebei          116.1667       37.8667           89       185     2012      11        26        331              0.198667       3.761261       0.000000       0.325681   -9999.000000   -9999.000000   -9999.000000       0.408000
54710     54710     hebei          116.1667       37.8667           89       185     2012      11        27        332              0.197750       3.207001       0.581261       0.322130       0.095000       0.251900       0.048900       0.403000
54710     54710     hebei          116.1667       37.8667           89       185     2012      11        28        333              0.197250       4.569763       0.000000       0.328092       0.114000   -9999.000000       0.107600   -9999.000000
54710     54710     hebei          116.1667       37.8667           89       185     2012      11        29        334              0.193125       2.927246       3.232077       0.310414   -9999.000000       0.243100       0.085300       0.341000
54710     54710     hebei          116.1667       37.8667           89       185     2012      11        30        335              0.189542       2.285858       0.000000       0.300940   -9999.000000       0.228800       0.089000       0.197000
54710     54710     hebei          116.1667       37.8667           89       185     2012      12        01        336              0.183833       0.381927       0.000000       0.263139   -9999.000000       0.172400       0.111500       0.347000
54710     54710     hebei          116.1667       37.8667           89       185     2012      12        02        337              0.184833       0.323578       0.000000       0.250926   -9999.000000       0.227700       0.104400       0.303000
54710     54710     hebei          116.1667       37.8667           89       185     2012      12        03        338              0.185125       0.352020       0.000000       0.250923   -9999.000000   -9999.000000       0.045700   -9999.000000
54710     54710     hebei          116.1667       37.8667           89       185     2012      12        04        339              0.180667       0.680054       0.000000       0.262948   -9999.000000   -9999.000000       0.105900       0.265000
54710     54710     hebei          116.1667       37.8667           89       185     2012      12        05        340              0.171958       0.663330       0.000000       0.266089   -9999.000000       0.301000       0.074400       0.137000
54710     54710     hebei          116.1667       37.8667           89       185     2012      12        06        341              0.157125      -0.669067       0.000000       0.235373   -9999.000000   -9999.000000       0.098700       0.280000
54710     54710     hebei          116.1667       37.8667           89       185     2012      12        07        342              0.135958      -0.991211       0.000000       0.218113   -9999.000000       0.175000   -9999.000000       0.222000
54710     54710     hebei          116.1667       37.8667           89       185     2012      12        08        343              0.101708      -1.187927       0.000000       0.212135   -9999.000000   -9999.000000       0.050000   -9999.000000
54710     54710     hebei          116.1667       37.8667           89       185     2012      12        09        344              0.083208      -3.005035       0.000000       0.188579   -9999.000000   -9999.000000       0.074700       0.028000
54710     54710     hebei          116.1667       37.8667           89       185     2012      12        10        345              0.083250      -2.269714       0.000000       0.194353   -9999.000000       0.120300       0.083400       0.132000
54710     54710     hebei          116.1667       37.8667           89       185     2012      12        11        346              0.087333      -1.529633       0.000000       0.205126   -9999.000000       0.223500       0.063000       0.193000
54710     54710     hebei          116.1667       37.8667           89       185     2012      12        12        347              0.089833      -1.046722       0.000000       0.206690   -9999.000000       0.062600       0.081300       0.002000
54710     54710     hebei          116.1667       37.8667           89       185     2012      12        13        348              0.097333      -0.776276       4.056213       0.210967   -9999.000000   -9999.000000   -9999.000000   -9999.000000
54710     54710     hebei          116.1667       37.8667           89       185     2012      12        14        349              0.106917      -0.105225       0.833709       0.218401       0.123000   -9999.000000       0.044300       0.025000
54710     54710     hebei          116.1667       37.8667           89       185     2012      12        15        350              0.000000      -0.704529       0.000000       0.207397   -9999.000000   -9999.000000       0.105100   -9999.000000
54710     54710     hebei          116.1667       37.8667           89       185     2012      12        16        351              0.136792       0.153503       0.140836       0.234708   -9999.000000   -9999.000000   -9999.000000       0.432000
54710     54710     hebei          116.1667       37.8667           89       185     2012      12        17        352              0.153625       0.207458       0.000000       0.240680   -9999.000000   -9999.000000       0.060500       0.129000
54710     54710     hebei          116.1667       37.8667           89       185     2012      12        18        353              0.117167      -1.428528       0.000000       0.213253   -9999.000000       0.074500       0.065200       0.193000
54710     54710     hebei          116.1667       37.8667           89       185     2012      12        19        354              0.100625      -2.525055       0.000000       0.188213   -9999.000000       0.099000       0.072800       0.158000
54710     54710     hebei          116.1667       37.8667           89       185     2012      12        20        355              0.000000      -1.837402       0.361452       0.193567   -9999.000000   -9999.000000       0.020500       0.256000
54710     54710     hebei          116.1667       37.8667           89       185     2012      12        21        356              0.099792      -1.481598       0.000000       0.196365   -9999.000000   -9999.000000       0.070500       0.201000
54710     54710     hebei          116.1667       37.8667           89       185     2012      12        22        357              0.086292      -1.796570       0.000000       0.199392   -9999.000000   -9999.000000       0.044800   -9999.000000
54710     54710     hebei          116.1667       37.8667           89       185     2012      12        23        358              0.071917      -3.279510       0.000000       0.185182   -9999.000000       0.121900   -9999.000000       0.215000
54710     54710     hebei          116.1667       37.8667           89       185     2012      12        24        359              0.066722      -6.012604       0.000000       0.163471   -9999.000000       0.123900   -9999.000000       0.132000
54710     54710     hebei          116.1667       37.8667           89       185     2012      12        25        360              0.064792      -5.136810       0.000000       0.162769   -9999.000000       0.100500       0.010400       0.172000
54710     54710     hebei          116.1667       37.8667           89       185     2012      12        26        361              0.000000      -6.010498       0.000000       0.161311   -9999.000000   -9999.000000       0.048300       0.136000
54710     54710     hebei          116.1667       37.8667           89       185     2012      12        27        362              0.068200      -4.666077       0.000000       0.163401   -9999.000000   -9999.000000       0.070300   -9999.000000
54710     54710     hebei          116.1667       37.8667           89       185     2012      12        28        363              0.076000      -2.343597       1.140780       0.181877   -9999.000000   -9999.000000       0.045400       0.190000
54710     54710     hebei          116.1667       37.8667           89       185     2012      12        29        364              0.000000      -2.326904       0.000000       0.182684   -9999.000000       0.171000   -9999.000000   -9999.000000
54710     54710     hebei          116.1667       37.8667           89       185     2012      12        30        365              0.000000      -4.699768       0.000000       0.168473   -9999.000000       0.177400   -9999.000000       0.205000
54710     54710     hebei          116.1667       37.8667           89       185     2012      12        31        366              0.070400      -4.119751       0.000000       0.173265   -9999.000000   -9999.000000       0.010000   -9999.000000
