# Supplementary material for: Research on Fusing Multisatellite Soil Moisture Data Based on Bayesian Model Averaging
Source: Hindawi journal article supplement (doi:10.1155/2018/9310838), 2018-06-25
Supplement: f1 [file 9310838.f1.zip › 2012_sm00-10cm_daily_ZDB_ZHY_54817_366days_allin.txt]

54817     54817     henan          115.8667       35.9833           96       183     2012      01        01        001              0.000000   -9999.000000       0.000000   -9999.000000   -9999.000000   -9999.000000       0.070800   -9999.000000
54817     54817     henan          115.8667       35.9833           96       183     2012      01        02        002              0.398625      -0.942108       1.196375       0.187576   -9999.000000   -9999.000000       0.097100   -9999.000000
54817     54817     henan          115.8667       35.9833           96       183     2012      01        03        003              0.000000      -1.091827       0.365851       0.188348   -9999.000000       0.158600       0.093600       0.195000
54817     54817     henan          115.8667       35.9833           96       183     2012      01        04        004              0.387125      -1.639343       0.496061       0.184959   -9999.000000   -9999.000000   -9999.000000   -9999.000000
54817     54817     henan          115.8667       35.9833           96       183     2012      01        05        005              0.377417      -1.737823       0.073446       0.183475   -9999.000000       0.202000       0.021900       0.160000
54817     54817     henan          115.8667       35.9833           96       183     2012      01        06        006              0.371348      -0.990936       0.000000       0.186177   -9999.000000       0.124100       0.084000       0.182000
54817     54817     henan          115.8667       35.9833           96       183     2012      01        07        007              0.365250      -0.736267       0.000000       0.186666   -9999.000000   -9999.000000       0.086400       0.286000
54817     54817     henan          115.8667       35.9833           96       183     2012      01        08        008              0.000000      -0.631256       0.000000       0.187708       0.094000       0.078600       0.088600       0.121000
54817     54817     henan          115.8667       35.9833           96       183     2012      01        09        009              0.367500      -0.007019       0.000000       0.189845       0.098000   -9999.000000   -9999.000000   -9999.000000
54817     54817     henan          115.8667       35.9833           96       183     2012      01        10        010              0.370750       0.712433       0.000000       0.193377   -9999.000000   -9999.000000       0.066400       0.212000
54817     54817     henan          115.8667       35.9833           96       183     2012      01        11        011              0.369500      -1.480743       0.000000       0.185631   -9999.000000       0.067400       0.047400       0.121000
54817     54817     henan          115.8667       35.9833           96       183     2012      01        12        012              0.364333      -0.602478       0.000000       0.186569   -9999.000000       0.117600       0.071900       0.434000
54817     54817     henan          115.8667       35.9833           96       183     2012      01        13        013              0.356500       0.131744       0.000000       0.189637       0.101000       0.021400       0.067600       0.177000
54817     54817     henan          115.8667       35.9833           96       183     2012      01        14        014              0.354917       0.314514       0.000000       0.189418   -9999.000000   -9999.000000       0.071500   -9999.000000
54817     54817     henan          115.8667       35.9833           96       183     2012      01        15        015              0.360958       0.662628       0.000000       0.192670       0.111000   -9999.000000   -9999.000000       0.343000
54817     54817     henan          115.8667       35.9833           96       183     2012      01        16        016              0.365792       1.297394       0.506927       0.193437   -9999.000000       0.027700       0.051200       0.583000
54817     54817     henan          115.8667       35.9833           96       183     2012      01        17        017              0.000000       1.553467       0.000000       0.200283   -9999.000000   -9999.000000       0.081000       0.724000
54817     54817     henan          115.8667       35.9833           96       183     2012      01        18        018              0.394708       1.914978       0.000000       0.208188   -9999.000000       0.097400       0.079700       0.481000
54817     54817     henan          115.8667       35.9833           96       183     2012      01        19        019              0.397750       1.707489       0.593274       0.206504   -9999.000000   -9999.000000       0.082400   -9999.000000
54817     54817     henan          115.8667       35.9833           96       183     2012      01        20        020              0.396792       1.649902       0.000000       0.205588   -9999.000000   -9999.000000       0.077100       0.174000
54817     54817     henan          115.8667       35.9833           96       183     2012      01        21        021              0.386542       0.205109       0.000000       0.197285   -9999.000000       0.066200   -9999.000000       0.128000
54817     54817     henan          115.8667       35.9833           96       183     2012      01        22        022              0.374000      -2.071655       0.000000       0.183194   -9999.000000   -9999.000000       0.010000       0.289000
54817     54817     henan          115.8667       35.9833           96       183     2012      01        23        023              0.362292      -2.536499       0.000000       0.178454   -9999.000000       0.064700       0.071000   -9999.000000
54817     54817     henan          115.8667       35.9833           96       183     2012      01        24        024              0.347125      -2.366608       0.000000       0.179084       0.093000       0.160300   -9999.000000   -9999.000000
54817     54817     henan          115.8667       35.9833           96       183     2012      01        25        025              0.328125      -1.746552       0.000000       0.180911       0.102000   -9999.000000       0.069300       0.057000
54817     54817     henan          115.8667       35.9833           96       183     2012      01        26        026              0.325542      -0.110382       0.124689       0.185874   -9999.000000       0.027800   -9999.000000   -9999.000000
54817     54817     henan          115.8667       35.9833           96       183     2012      01        27        027              0.331958       1.490540       0.000000       0.191573   -9999.000000   -9999.000000       0.072600       0.225000
54817     54817     henan          115.8667       35.9833           96       183     2012      01        28        028              0.342625       1.547729       0.000000       0.193306       0.097000   -9999.000000       0.057000       0.006000
54817     54817     henan          115.8667       35.9833           96       183     2012      01        29        029              0.349167       1.383423       0.067204       0.193228   -9999.000000       0.110000       0.075300   -9999.000000
54817     54817     henan          115.8667       35.9833           96       183     2012      01        30        030              0.353500      -0.279846       0.000000       0.190144       0.100000       0.105800       0.067300       0.036000
54817     54817     henan          115.8667       35.9833           96       183     2012      01        31        031              0.354667       1.007599       0.000000       0.192532   -9999.000000       0.073600       0.077000   -9999.000000
54817     54817     henan          115.8667       35.9833           96       183     2012      02        01        032              0.353750       1.143738       0.000000       0.192092   -9999.000000   -9999.000000   -9999.000000       0.032000
54817     54817     henan          115.8667       35.9833           96       183     2012      02        02        033              0.333958      -1.533234       0.000000       0.181450       0.063000   -9999.000000       0.030400   -9999.000000
54817     54817     henan          115.8667       35.9833           96       183     2012      02        03        034              0.321917      -0.711456       0.000000       0.181701       0.092000       0.127800       0.066000       0.147000
54817     54817     henan          115.8667       35.9833           96       183     2012      02        04        035              0.322083       0.954681       0.000000       0.186601       0.092000   -9999.000000       0.064100       0.115000
54817     54817     henan          115.8667       35.9833           96       183     2012      02        05        036              0.330125       1.296936       0.000000       0.188312       0.106000       0.162900       0.068800       0.361000
54817     54817     henan          115.8667       35.9833           96       183     2012      02        06        037              0.338667       2.982178       0.000000       0.192135   -9999.000000   -9999.000000       0.075800       0.161000
54817     54817     henan          115.8667       35.9833           96       183     2012      02        07        038              0.328792       0.765961       0.000000       0.184652       0.068000   -9999.000000   -9999.000000   -9999.000000
54817     54817     henan          115.8667       35.9833           96       183     2012      02        08        039              0.303583      -1.495453       0.000000       0.175901       0.085000       0.094700       0.022100       0.155000
54817     54817     henan          115.8667       35.9833           96       183     2012      02        09        040              0.298625      -0.978363       0.000000       0.177021       0.083000   -9999.000000       0.071100       0.118000
54817     54817     henan          115.8667       35.9833           96       183     2012      02        10        041              0.296500      -0.330719       0.000000       0.178606       0.096000   -9999.000000       0.069700       0.260000
54817     54817     henan          115.8667       35.9833           96       183     2012      02        11        042              0.294417       0.662018       0.000000       0.178929   -9999.000000       0.152200       0.074100       0.140000
54817     54817     henan          115.8667       35.9833           96       183     2012      02        12        043              0.306833       2.850037       0.056899       0.183022   -9999.000000   -9999.000000   -9999.000000   -9999.000000
54817     54817     henan          115.8667       35.9833           96       183     2012      02        13        044              0.319083       1.423920       0.118307       0.184562       0.095000       0.161000   -9999.000000       0.243000
54817     54817     henan          115.8667       35.9833           96       183     2012      02        14        045              0.330083       1.519836       0.173720       0.186704       0.087000   -9999.000000       0.064500       0.283000
54817     54817     henan          115.8667       35.9833           96       183     2012      02        15        046              0.341167       3.370789       0.000000       0.188619       0.093000   -9999.000000       0.076200       0.398000
54817     54817     henan          115.8667       35.9833           96       183     2012      02        16        047              0.346250       2.990723       0.000000       0.187766   -9999.000000       0.090800       0.070200       0.062000
54817     54817     henan          115.8667       35.9833           96       183     2012      02        17        048              0.345000       2.034882       0.000000       0.181699   -9999.000000       0.145400       0.079100   -9999.000000
54817     54817     henan          115.8667       35.9833           96       183     2012      02        18        049              0.340375       1.313232       3.700078       0.177532       0.074000       0.027700   -9999.000000       0.084000
54817     54817     henan          115.8667       35.9833           96       183     2012      02        19        050              0.331333       2.557220       0.000000       0.178060       0.086000   -9999.000000       0.037400       0.229000
54817     54817     henan          115.8667       35.9833           96       183     2012      02        20        051              0.338208       3.997894       0.315798       0.223392       0.091000   -9999.000000       0.081900       0.406000
54817     54817     henan          115.8667       35.9833           96       183     2012      02        21        052              0.350696       5.973785       1.035578       0.215573   -9999.000000   -9999.000000   -9999.000000       0.147000
54817     54817     henan          115.8667       35.9833           96       183     2012      02        22        053              0.357435       6.998993       0.000000       0.209947   -9999.000000   -9999.000000       0.088200   -9999.000000
54817     54817     henan          115.8667       35.9833           96       183     2012      02        23        054              0.355542       8.025787       0.000000       0.205443       0.074000       0.059500   -9999.000000       0.241000
54817     54817     henan          115.8667       35.9833           96       183     2012      02        24        055              0.351333       4.010437       0.000000       0.199084       0.104000   -9999.000000   -9999.000000   -9999.000000
54817     54817     henan          115.8667       35.9833           96       183     2012      02        25        056              0.349042       2.812775       0.000000       0.195668       0.102000   -9999.000000       0.037900       0.291000
54817     54817     henan          115.8667       35.9833           96       183     2012      02        26        057              0.344792       2.867767       0.000000       0.193527       0.104000       0.044100       0.079700       0.103000
54817     54817     henan          115.8667       35.9833           96       183     2012      02        27        058              0.341833       3.921448       0.000000       0.191158   -9999.000000   -9999.000000   -9999.000000   -9999.000000
54817     54817     henan          115.8667       35.9833           96       183     2012      02        28        059              0.339708       5.154480       2.340095       0.189402   -9999.000000       0.133700       0.077000       0.311000
54817     54817     henan          115.8667       35.9833           96       183     2012      02        29        060              0.000000   -9999.000000       0.000000   -9999.000000       0.112000       0.108600   -9999.000000   -9999.000000
54817     54817     henan          115.8667       35.9833           96       183     2012      03        01        061              0.338375       7.032959       0.516704       0.186265       0.110000   -9999.000000       0.067900       0.543000
54817     54817     henan          115.8667       35.9833           96       183     2012      03        02        062              0.344333       5.685669       0.000000       0.191140       0.116000       0.186200       0.063900   -9999.000000
54817     54817     henan          115.8667       35.9833           96       183     2012      03        03        063              0.341167       4.678986       0.615341       0.191977   -9999.000000   -9999.000000       0.084800       0.372000
54817     54817     henan          115.8667       35.9833           96       183     2012      03        04        064              0.338000       5.181519       0.217880       0.188789   -9999.000000       0.187100       0.070400       0.343000
54817     54817     henan          115.8667       35.9833           96       183     2012      03        05        065              0.334250       4.960541       0.035920       0.186222       0.104000       0.142900       0.083500       0.468000
54817     54817     henan          115.8667       35.9833           96       183     2012      03        06        066              0.331417       5.615814       0.298339       0.184489       0.099000   -9999.000000   -9999.000000       0.376000
54817     54817     henan          115.8667       35.9833           96       183     2012      03        07        067              0.000000       6.410156       0.356100       0.181836       0.101000   -9999.000000       0.028000   -9999.000000
54817     54817     henan          115.8667       35.9833           96       183     2012      03        08        068              0.326167       9.221802       0.794322       0.178393   -9999.000000   -9999.000000       0.093900       0.467000
54817     54817     henan          115.8667       35.9833           96       183     2012      03        09        069              0.324125       5.900269       0.034645       0.177242   -9999.000000       0.106200       0.072300       0.365000
54817     54817     henan          115.8667       35.9833           96       183     2012      03        10        070              0.321565       6.671967       0.000000       0.177237       0.072000       0.171900       0.081900       0.546000
54817     54817     henan          115.8667       35.9833           96       183     2012      03        11        071              0.318750       8.189972       0.000000       0.175649       0.102000   -9999.000000   -9999.000000       0.219000
54817     54817     henan          115.8667       35.9833           96       183     2012      03        12        072              0.317000       4.680206       0.171154       0.173047       0.105000       0.211200       0.079600   -9999.000000
54817     54817     henan          115.8667       35.9833           96       183     2012      03        13        073              0.316375       6.952332       0.180654       0.173024       0.111000       0.159600       0.043300       0.526000
54817     54817     henan          115.8667       35.9833           96       183     2012      03        14        074              0.315333      11.363983       0.000000       0.173707   -9999.000000       0.266700       0.080900       0.433000
54817     54817     henan          115.8667       35.9833           96       183     2012      03        15        075              0.312333      11.005829       0.374313       0.173354       0.127000       0.061900       0.085300       0.518000
54817     54817     henan          115.8667       35.9833           96       183     2012      03        16        076              0.316458       8.340576       0.285178       0.175173       0.115000   -9999.000000       0.091800       0.302000
54817     54817     henan          115.8667       35.9833           96       183     2012      03        17        077              0.316292      10.926178       0.265346       0.179097       0.095000       0.166500   -9999.000000   -9999.000000
54817     54817     henan          115.8667       35.9833           96       183     2012      03        18        078              0.312833      13.216034       0.875112       0.177172       0.111000       0.060600       0.057400       0.310000
54817     54817     henan          115.8667       35.9833           96       183     2012      03        19        079              0.311083       6.384369       0.255142       0.176172       0.138000   -9999.000000       0.100500       0.411000
54817     54817     henan          115.8667       35.9833           96       183     2012      03        20        080              0.311000       4.727509       0.513535       0.178117   -9999.000000       0.131900       0.110800       0.456000
54817     54817     henan          115.8667       35.9833           96       183     2012      03        21        081              0.331167       7.648102       4.173168       0.177015   -9999.000000   -9999.000000       0.151200       0.703000
54817     54817     henan          115.8667       35.9833           96       183     2012      03        22        082              0.375958       5.186920       0.477206       0.206985   -9999.000000   -9999.000000       0.154400   -9999.000000
54817     54817     henan          115.8667       35.9833           96       183     2012      03        23        083              0.367208       5.768127       0.830986       0.238614       0.158000       0.319700   -9999.000000       0.513000
54817     54817     henan          115.8667       35.9833           96       183     2012      03        24        084              0.354417      10.032257       0.000000       0.220113   -9999.000000       0.046000   -9999.000000   -9999.000000
54817     54817     henan          115.8667       35.9833           96       183     2012      03        25        085              0.000000      14.046326       0.000000       0.202512   -9999.000000       0.243700       0.110300       0.385000
54817     54817     henan          115.8667       35.9833           96       183     2012      03        26        086              0.335208      13.830536       0.465336       0.191116       0.125000   -9999.000000       0.111800   -9999.000000
54817     54817     henan          115.8667       35.9833           96       183     2012      03        27        087              0.327917      16.293549       0.319407       0.185459       0.120000       0.146700       0.108200   -9999.000000
54817     54817     henan          115.8667       35.9833           96       183     2012      03        28        088              0.319708      18.187134       0.166377       0.181484       0.121000       0.075200   -9999.000000       0.384000
54817     54817     henan          115.8667       35.9833           96       183     2012      03        29        089              0.315375      19.200165       0.348204       0.175280   -9999.000000   -9999.000000       0.112100   -9999.000000
54817     54817     henan          115.8667       35.9833           96       183     2012      03        30        090              0.301708      19.107147       1.248250       0.173508       0.149000       0.198300       0.060700       0.269000
54817     54817     henan          115.8667       35.9833           96       183     2012      03        31        091              0.290667      15.129242       3.541255       0.175906       0.117500   -9999.000000       0.106000   -9999.000000
54817     54817     henan          115.8667       35.9833           96       183     2012      04        01        092              0.282333      16.730103       0.074315       0.217306       0.177000   -9999.000000       0.097700       0.391000
54817     54817     henan          115.8667       35.9833           96       183     2012      04        02        093              0.277333      16.787384       0.219233       0.197113       0.174000   -9999.000000       0.133500       0.235000
54817     54817     henan          115.8667       35.9833           96       183     2012      04        03        094              0.272250       8.048065       0.900351       0.193075       0.167000   -9999.000000   -9999.000000       0.405000
54817     54817     henan          115.8667       35.9833           96       183     2012      04        04        095              0.262500      14.908844       0.258133       0.188543       0.202000       0.077900       0.078100       0.275000
54817     54817     henan          115.8667       35.9833           96       183     2012      04        05        096              0.254375      19.140900       0.000000       0.178412       0.163500   -9999.000000       0.116400   -9999.000000
54817     54817     henan          115.8667       35.9833           96       183     2012      04        06        097              0.246250      18.525879       0.467216       0.171332       0.164000       0.100400       0.134100       0.402000
54817     54817     henan          115.8667       35.9833           96       183     2012      04        07        098              0.237625      20.161957       3.307953       0.167866       0.125000       0.121400       0.114400       0.291000
54817     54817     henan          115.8667       35.9833           96       183     2012      04        08        099              0.233750      22.450928       0.776251       0.166240       0.141000   -9999.000000       0.111600       0.416000
54817     54817     henan          115.8667       35.9833           96       183     2012      04        09        100              0.230167      22.944183       8.291251       0.165582       0.193000       0.055800   -9999.000000       0.177000
54817     54817     henan          115.8667       35.9833           96       183     2012      04        10        101              0.230000      22.570740       0.254277       0.201379       0.209000       0.193900       0.065000   -9999.000000
54817     54817     henan          115.8667       35.9833           96       183     2012      04        11        102              0.228750      18.129364       9.722713       0.255850       0.221500   -9999.000000       0.205100       0.480000
54817     54817     henan          115.8667       35.9833           96       183     2012      04        12        103              0.228375      16.150787       2.860188       0.250673       0.239500       0.127500       0.170800       0.269000
54817     54817     henan          115.8667       35.9833           96       183     2012      04        13        104              0.229000      15.488434       0.050209       0.298120       0.175000   -9999.000000       0.168500       0.538000
54817     54817     henan          115.8667       35.9833           96       183     2012      04        14        105              0.227375      19.773926       1.317168       0.261847       0.251000   -9999.000000   -9999.000000       0.153000
54817     54817     henan          115.8667       35.9833           96       183     2012      04        15        106              0.224208      19.962372       0.051948       0.242425       0.249000   -9999.000000       0.153800   -9999.000000
54817     54817     henan          115.8667       35.9833           96       183     2012      04        16        107              0.222000      20.401276       0.405125       0.227050       0.185500   -9999.000000       0.082000       0.042000
54817     54817     henan          115.8667       35.9833           96       183     2012      04        17        108              0.221500      18.681396       0.152919       0.215852       0.191500       0.156900       0.099000       0.099000
54817     54817     henan          115.8667       35.9833           96       183     2012      04        18        109              0.221833      20.878845       1.333609       0.206364       0.168000   -9999.000000   -9999.000000       0.231000
54817     54817     henan          115.8667       35.9833           96       183     2012      04        19        110              0.220917      21.375031       1.880952       0.196978   -9999.000000       0.118700       0.111300       0.024000
54817     54817     henan          115.8667       35.9833           96       183     2012      04        20        111              0.220000      22.542084       2.102061       0.188661       0.230000       0.111800   -9999.000000   -9999.000000
54817     54817     henan          115.8667       35.9833           96       183     2012      04        21        112              0.219000      19.224548       0.000000       0.187096       0.181500   -9999.000000       0.070800       0.016000
54817     54817     henan          115.8667       35.9833           96       183     2012      04        22        113              0.217000      20.374603       0.114174       0.183841       0.199500       0.070300       0.124500   -9999.000000
54817     54817     henan          115.8667       35.9833           96       183     2012      04        23        114              0.216583      24.544556      20.914551       0.179316       0.161000       0.147100       0.157000       0.079000
54817     54817     henan          115.8667       35.9833           96       183     2012      04        24        115              0.289167      27.713654       2.726856       0.226647       0.245000   -9999.000000       0.263800       0.716000
54817     54817     henan          115.8667       35.9833           96       183     2012      04        25        116              0.000000      18.040894       0.690820       0.313838   -9999.000000       0.463100       0.194400   -9999.000000
54817     54817     henan          115.8667       35.9833           96       183     2012      04        26        117              0.313042      18.937073       0.622684       0.278858       0.264000   -9999.000000   -9999.000000       0.183000
54817     54817     henan          115.8667       35.9833           96       183     2012      04        27        118              0.286125      21.719940       0.543066       0.263614       0.206000       0.190800   -9999.000000   -9999.000000
54817     54817     henan          115.8667       35.9833           96       183     2012      04        28        119              0.271304      25.235321       0.000000       0.248675       0.159000       0.220100       0.202600       0.059000
54817     54817     henan          115.8667       35.9833           96       183     2012      04        29        120              0.261833      20.701355       0.110965       0.232672       0.167000       0.330000       0.165300   -9999.000000
54817     54817     henan          115.8667       35.9833           96       183     2012      04        30        121              0.255333      21.661835       0.000000       0.220041       0.242000       0.181600       0.179300       0.377000
54817     54817     henan          115.8667       35.9833           96       183     2012      05        01        122              0.249667      22.913025       0.000000       0.213446       0.296000   -9999.000000   -9999.000000       0.039000
54817     54817     henan          115.8667       35.9833           96       183     2012      05        02        123              0.241667      25.083832       0.475989       0.201568       0.237000       0.154500       0.194000       0.257000
54817     54817     henan          115.8667       35.9833           96       183     2012      05        03        124              0.233000      26.598328       0.084183       0.190392       0.226000       0.171600       0.143500       0.057000
54817     54817     henan          115.8667       35.9833           96       183     2012      05        04        125              0.224500      28.187927       0.000000       0.181730       0.173000   -9999.000000       0.194400   -9999.000000
54817     54817     henan          115.8667       35.9833           96       183     2012      05        05        126              0.218600      29.202179       0.000000       0.177431   -9999.000000   -9999.000000       0.162300       0.273000
54817     54817     henan          115.8667       35.9833           96       183     2012      05        06        127              0.212875      26.942871       0.120370       0.175901       0.279000   -9999.000000       0.177200       0.003000
54817     54817     henan          115.8667       35.9833           96       183     2012      05        07        128              0.210958      29.912537       4.101175       0.173548   -9999.000000       0.230100   -9999.000000       0.217000
54817     54817     henan          115.8667       35.9833           96       183     2012      05        08        129              0.209583      26.160858       0.000000       0.175865       0.229500       0.155500       0.086900       0.043000
54817     54817     henan          115.8667       35.9833           96       183     2012      05        09        130              0.207833      28.513153       0.000000       0.173309       0.183000   -9999.000000       0.149600   -9999.000000
54817     54817     henan          115.8667       35.9833           96       183     2012      05        10        131              0.204958      29.762177       0.000000       0.169319       0.197000   -9999.000000       0.134800       0.198000
54817     54817     henan          115.8667       35.9833           96       183     2012      05        11        132              0.202625      28.737671       0.131742       0.168567       0.250000       0.249700       0.142400       0.004000
54817     54817     henan          115.8667       35.9833           96       183     2012      05        12        133              0.200125      27.692261       1.683907       0.167392       0.208500       0.335600       0.157000       0.472000
54817     54817     henan          115.8667       35.9833           96       183     2012      05        13        134              0.201083      21.178040       0.000000       0.192415       0.207000       0.350700   -9999.000000       0.146000
54817     54817     henan          115.8667       35.9833           96       183     2012      05        14        135              0.201375      24.478485       0.000000       0.181601       0.156000   -9999.000000       0.090600   -9999.000000
54817     54817     henan          115.8667       35.9833           96       183     2012      05        15        136              0.199826      27.194031       0.000000       0.169418       0.164000       0.212600       0.181700       0.009000
54817     54817     henan          115.8667       35.9833           96       183     2012      05        16        137              0.199875      26.420013       1.013906       0.164563       0.248000       0.246100       0.144200   -9999.000000
54817     54817     henan          115.8667       35.9833           96       183     2012      05        17        138              0.201000      26.740967       0.075689       0.163046       0.246000   -9999.000000       0.164500       0.322000
54817     54817     henan          115.8667       35.9833           96       183     2012      05        18        139              0.199708      29.843964       0.000000       0.161478       0.204000       0.257300   -9999.000000       0.047000
54817     54817     henan          115.8667       35.9833           96       183     2012      05        19        140              0.198292      30.350250       0.000000       0.162123       0.159000   -9999.000000       0.125000   -9999.000000
54817     54817     henan          115.8667       35.9833           96       183     2012      05        20        141              0.195583      31.164886       0.000000       0.160901       0.169000       0.305900       0.140700       0.021000
54817     54817     henan          115.8667       35.9833           96       183     2012      05        21        142              0.193625      29.407684       0.730051       0.161757       0.168000       0.177700       0.131000   -9999.000000
54817     54817     henan          115.8667       35.9833           96       183     2012      05        22        143              0.191500      27.369781       0.532396       0.161603       0.178000       0.429900       0.121600       0.086000
54817     54817     henan          115.8667       35.9833           96       183     2012      05        23        144              0.191583      24.677460       2.136267       0.162235   -9999.000000       0.184100       0.133400       0.103000
54817     54817     henan          115.8667       35.9833           96       183     2012      05        24        145              0.190292      28.835022       1.111004       0.160287       0.121000   -9999.000000   -9999.000000   -9999.000000
54817     54817     henan          115.8667       35.9833           96       183     2012      05        25        146              0.000000      26.781494       1.150089       0.171324       0.117000       0.262500       0.062300       0.184000
54817     54817     henan          115.8667       35.9833           96       183     2012      05        26        147              0.190917      29.163300       0.000000       0.164374   -9999.000000       0.113100       0.135700   -9999.000000
54817     54817     henan          115.8667       35.9833           96       183     2012      05        27        148              0.191042      30.637329       0.193865       0.159901       0.185000   -9999.000000       0.113800       0.252000
54817     54817     henan          115.8667       35.9833           96       183     2012      05        28        149              0.190042      32.334534       0.000000       0.158323       0.119500       0.135900       0.125500   -9999.000000
54817     54817     henan          115.8667       35.9833           96       183     2012      05        29        150              0.185708      31.847107       0.866620       0.157391       0.172000       0.245200   -9999.000000       0.290000
54817     54817     henan          115.8667       35.9833           96       183     2012      05        30        151              0.187167      22.946503       0.000000       0.169137       0.114000       0.148000   -9999.000000   -9999.000000
54817     54817     henan          115.8667       35.9833           96       183     2012      05        31        152              0.186750      27.429382       0.000000       0.160283       0.126000       0.238200   -9999.000000   -9999.000000
54817     54817     henan          115.8667       35.9833           96       183     2012      06        01        153              0.184750      29.723572       1.419351       0.157442       0.149000   -9999.000000       0.132000       0.315000
54817     54817     henan          115.8667       35.9833           96       183     2012      06        02        154              0.185250      27.737335       0.000000       0.158359       0.106500       0.174600       0.120500   -9999.000000
54817     54817     henan          115.8667       35.9833           96       183     2012      06        03        155              0.184167      30.535645       0.000000       0.156658       0.120500       0.311700       0.129100       0.428000
54817     54817     henan          115.8667       35.9833           96       183     2012      06        04        156              0.183917      30.125671       0.000000       0.155730       0.087000   -9999.000000   -9999.000000       0.314000
54817     54817     henan          115.8667       35.9833           96       183     2012      06        05        157              0.183000      31.820892       0.084423       0.154982       0.098000       0.208500       0.079800       0.503000
54817     54817     henan          115.8667       35.9833           96       183     2012      06        06        158              0.179833      32.117584       0.265789       0.155544       0.144000   -9999.000000       0.097300       0.214000
54817     54817     henan          115.8667       35.9833           96       183     2012      06        07        159              0.180208      27.060730       0.660653       0.158959       0.147000       0.407600       0.116800   -9999.000000
54817     54817     henan          115.8667       35.9833           96       183     2012      06        08        160              0.180458      32.071198       0.416379       0.157936       0.124500       0.446500       0.104100       0.535000
54817     54817     henan          115.8667       35.9833           96       183     2012      06        09        161              0.180375      32.100739       0.505880       0.156560       0.120000       0.201400       0.108100       0.295000
54817     54817     henan          115.8667       35.9833           96       183     2012      06        10        162              0.176500      34.295990       0.269417       0.154299       0.114000       0.194900   -9999.000000       0.449000
54817     54817     henan          115.8667       35.9833           96       183     2012      06        11        163              0.000000      26.802032       1.502401       0.157075       0.096000   -9999.000000       0.052000       0.315000
54817     54817     henan          115.8667       35.9833           96       183     2012      06        12        164              0.179083      31.607910       0.000000       0.152650       0.105000       0.148400       0.128900   -9999.000000
54817     54817     henan          115.8667       35.9833           96       183     2012      06        13        165              0.177625      33.769196       0.352626       0.151099       0.084000       0.184300       0.134400       0.444000
54817     54817     henan          115.8667       35.9833           96       183     2012      06        14        166              0.175458      35.067200       0.126695       0.153181       0.100500       0.452300       0.149700       0.350000
54817     54817     henan          115.8667       35.9833           96       183     2012      06        15        167              0.175417      30.594940       0.000000       0.153560       0.104000       0.245400   -9999.000000       0.667000
54817     54817     henan          115.8667       35.9833           96       183     2012      06        16        168              0.174625      31.155243       0.000000       0.151524   -9999.000000   -9999.000000       0.128600       0.490000
54817     54817     henan          115.8667       35.9833           96       183     2012      06        17        169              0.172667      33.749115       0.000000       0.150816       0.120000   -9999.000000       0.086000   -9999.000000
54817     54817     henan          115.8667       35.9833           96       183     2012      06        18        170              0.171917      33.796265       0.000000       0.151690       0.097500       0.294600       0.099700       0.544000
54817     54817     henan          115.8667       35.9833           96       183     2012      06        19        171              0.171000      33.953064       0.000000       0.151287       0.117500   -9999.000000       0.130800   -9999.000000
54817     54817     henan          115.8667       35.9833           96       183     2012      06        20        172              0.170542      35.007202       0.000000       0.151439       0.118000       0.253500       0.135000       0.510000
54817     54817     henan          115.8667       35.9833           96       183     2012      06        21        173              0.169458      35.815765       0.000000       0.151394       0.132000   -9999.000000   -9999.000000       0.557000
54817     54817     henan          115.8667       35.9833           96       183     2012      06        22        174              0.168250      36.348328       0.000000       0.151438       0.124000   -9999.000000       0.071600   -9999.000000
54817     54817     henan          115.8667       35.9833           96       183     2012      06        23        175              0.167458      36.083099       0.000000       0.151500       0.130000       0.235400       0.098400       0.473000
54817     54817     henan          115.8667       35.9833           96       183     2012      06        24        176              0.166458      35.968903       1.078679       0.151558       0.124000   -9999.000000       0.094300   -9999.000000
54817     54817     henan          115.8667       35.9833           96       183     2012      06        25        177              0.164333      35.061798       0.225796       0.150597       0.123000       0.476900       0.112800       0.449000
54817     54817     henan          115.8667       35.9833           96       183     2012      06        26        178              0.164333      34.353668       7.727347       0.151328       0.121000       0.111900       0.121800   -9999.000000
54817     54817     henan          115.8667       35.9833           96       183     2012      06        27        179              0.165375      30.382965       0.666684       0.223749       0.126000   -9999.000000   -9999.000000       0.770000
54817     54817     henan          115.8667       35.9833           96       183     2012      06        28        180              0.167042      29.403198       0.232797       0.204565       0.141000       0.157800       0.045800       0.637000
54817     54817     henan          115.8667       35.9833           96       183     2012      06        29        181              0.171000      27.744965       7.798131       0.189396       0.150500   -9999.000000       0.122900       1.000000
54817     54817     henan          115.8667       35.9833           96       183     2012      06        30        182              0.176792      25.742065       0.000000       0.258994       0.132000       0.541100       0.124600   -9999.000000
54817     54817     henan          115.8667       35.9833           96       183     2012      07        01        183              0.182375      30.002960       0.000000       0.224004       0.173000       0.272800       0.126600   -9999.000000
54817     54817     henan          115.8667       35.9833           96       183     2012      07        02        184              0.185250      33.071777       0.000000       0.190208       0.157000   -9999.000000   -9999.000000       0.892000
54817     54817     henan          115.8667       35.9833           96       183     2012      07        03        185              0.190250      33.278137       0.000000       0.177401       0.151000       0.275500       0.092500       0.643000
54817     54817     henan          115.8667       35.9833           96       183     2012      07        04        186              0.189375      35.949158      20.641977       0.169528       0.129000       0.224300       0.092300       0.694000
54817     54817     henan          115.8667       35.9833           96       183     2012      07        05        187              0.191083      29.975739       0.470329       0.277820       0.172000   -9999.000000       0.120000       0.673000
54817     54817     henan          115.8667       35.9833           96       183     2012      07        06        188              0.192542      27.397797       0.000000       0.276853   -9999.000000       0.165000       0.119700   -9999.000000
54817     54817     henan          115.8667       35.9833           96       183     2012      07        07        189              0.210875      31.269836      11.747042       0.235330   -9999.000000   -9999.000000       0.101400       0.959000
54817     54817     henan          115.8667       35.9833           96       183     2012      07        08        190              0.299417      29.914612       0.262824       0.272317       0.190000       0.224100   -9999.000000       0.824000
54817     54817     henan          115.8667       35.9833           96       183     2012      07        09        191              0.345000      29.224274      44.170338       0.281148       0.227000       0.279900       0.105400       1.000000
54817     54817     henan          115.8667       35.9833           96       183     2012      07        10        192              0.363458      28.887634       0.275763       0.353241       0.186000   -9999.000000       0.144100       0.943000
54817     54817     henan          115.8667       35.9833           96       183     2012      07        11        193              0.343167      29.683441       3.380455       0.329111       0.176000       0.142200       0.128100   -9999.000000
54817     54817     henan          115.8667       35.9833           96       183     2012      07        12        194              0.328917      33.103760       1.457934       0.308074       0.171000   -9999.000000       0.132400       0.865000
54817     54817     henan          115.8667       35.9833           96       183     2012      07        13        195              0.315500      32.547729       0.769466       0.294367       0.181000   -9999.000000       0.136400       0.911000
54817     54817     henan          115.8667       35.9833           96       183     2012      07        14        196              0.307708      29.363434       1.429181       0.271405       0.191000       0.401400   -9999.000000       0.876000
54817     54817     henan          115.8667       35.9833           96       183     2012      07        15        197              0.304792      27.558594       0.000000       0.260216       0.163500       0.260600       0.058700       0.709000
54817     54817     henan          115.8667       35.9833           96       183     2012      07        16        198              0.302333      29.457458       0.000000       0.238962       0.159000       0.166700       0.102500   -9999.000000
54817     54817     henan          115.8667       35.9833           96       183     2012      07        17        199              0.299542      30.412933       0.450469       0.223291       0.140000   -9999.000000       0.085200       0.734000
54817     54817     henan          115.8667       35.9833           96       183     2012      07        18        200              0.297125      31.030029       0.000000       0.216099   -9999.000000   -9999.000000       0.081900   -9999.000000
54817     54817     henan          115.8667       35.9833           96       183     2012      07        19        201              0.294250      31.784821       0.000000       0.202500       0.178000       0.089600   -9999.000000       0.815000
54817     54817     henan          115.8667       35.9833           96       183     2012      07        20        202              0.291917      33.035553       0.000000       0.192217       0.131000       0.332700       0.084000   -9999.000000
54817     54817     henan          115.8667       35.9833           96       183     2012      07        21        203              0.291917      33.734680       0.837886       0.186711       0.294000       0.145600       0.065400   -9999.000000
54817     54817     henan          115.8667       35.9833           96       183     2012      07        22        204              0.290875      34.587189       1.580217       0.184081       0.276000       0.070500       0.099700       0.822000
54817     54817     henan          115.8667       35.9833           96       183     2012      07        23        205              0.291083      31.231171       0.000000       0.197172       0.228000       0.153500       0.097300   -9999.000000
54817     54817     henan          115.8667       35.9833           96       183     2012      07        24        206              0.289250      33.718109       3.583285       0.181304   -9999.000000       0.125900       0.102700       0.769000
54817     54817     henan          115.8667       35.9833           96       183     2012      07        25        207              0.289125      34.670776       0.500425       0.191937       0.329000   -9999.000000   -9999.000000   -9999.000000
54817     54817     henan          115.8667       35.9833           96       183     2012      07        26        208              0.287833      34.695679       0.513791       0.208209       0.302500       0.126600       0.067400       0.789000
54817     54817     henan          115.8667       35.9833           96       183     2012      07        27        209              0.285542      36.370392       5.258461       0.184154       0.303500       0.228300       0.120200       0.898000
54817     54817     henan          115.8667       35.9833           96       183     2012      07        28        210              0.283250      34.858490       0.000000       0.219062       0.254000       0.108900       0.100500       0.872000
54817     54817     henan          115.8667       35.9833           96       183     2012      07        29        211              0.280833      35.643555       0.772780       0.203933       0.341000       0.065000       0.099000       0.725000
54817     54817     henan          115.8667       35.9833           96       183     2012      07        30        212              0.276125      37.162231       6.449195       0.187030       0.352000   -9999.000000       0.070200   -9999.000000
54817     54817     henan          115.8667       35.9833           96       183     2012      07        31        213              0.278167      33.226410      66.890671       0.223982       0.294000   -9999.000000   -9999.000000       1.000000
54817     54817     henan          115.8667       35.9833           96       183     2012      08        01        214              0.340625      26.462860       4.543076       0.394446       0.500000       0.196400       0.042600       0.807000
54817     54817     henan          115.8667       35.9833           96       183     2012      08        02        215              0.329500      25.701752       3.469759       0.363141       0.431000       0.234800       0.075600       0.865000
54817     54817     henan          115.8667       35.9833           96       183     2012      08        03        216              0.322750      27.227325       0.147740       0.334243       0.494000       0.212600       0.065200       0.851000
54817     54817     henan          115.8667       35.9833           96       183     2012      08        04        217              0.344750      26.910248      40.880165       0.322962   -9999.000000   -9999.000000       0.073700   -9999.000000
54817     54817     henan          115.8667       35.9833           96       183     2012      08        05        218              0.348750      26.464386       0.541375       0.371082       0.442500   -9999.000000   -9999.000000       1.000000
54817     54817     henan          115.8667       35.9833           96       183     2012      08        06        219              0.337917      28.063965       0.517431       0.359691       0.479000       0.070600       0.077300       0.732000
54817     54817     henan          115.8667       35.9833           96       183     2012      08        07        220              0.328292      28.868256       0.450002       0.341062       0.356000   -9999.000000   -9999.000000       0.926000
54817     54817     henan          115.8667       35.9833           96       183     2012      08        08        221              0.318750      30.431396       1.963081       0.326870       0.402000       0.123200       0.090800       0.705000
54817     54817     henan          115.8667       35.9833           96       183     2012      08        09        222              0.310833      30.887146       0.000000       0.315329       0.500000       0.118800       0.075200   -9999.000000
54817     54817     henan          115.8667       35.9833           96       183     2012      08        10        223              0.305435      29.117676       0.623986       0.306576       0.500000   -9999.000000       0.075800       0.769000
54817     54817     henan          115.8667       35.9833           96       183     2012      08        11        224              0.300708      29.316986       0.283028       0.301707       0.455000       0.148700   -9999.000000       0.602000
54817     54817     henan          115.8667       35.9833           96       183     2012      08        12        225              0.294208      30.877655       1.361413       0.292026       0.467000   -9999.000000       0.036900       0.763000
54817     54817     henan          115.8667       35.9833           96       183     2012      08        13        226              0.288083      27.125580       0.400553       0.292787       0.360000   -9999.000000       0.109000       0.596000
54817     54817     henan          115.8667       35.9833           96       183     2012      08        14        227              0.285000      25.967499       1.912752       0.290042   -9999.000000       0.112200       0.107400   -9999.000000
54817     54817     henan          115.8667       35.9833           96       183     2012      08        15        228              0.281958      23.737823       1.800401       0.291652       0.500000   -9999.000000       0.095400       0.636000
54817     54817     henan          115.8667       35.9833           96       183     2012      08        16        229              0.276542      26.639221       0.371459       0.279851       0.354500       0.074700   -9999.000000   -9999.000000
54817     54817     henan          115.8667       35.9833           96       183     2012      08        17        230              0.272625      27.860260       0.115503       0.268292       0.439000   -9999.000000       0.100700       0.550000
54817     54817     henan          115.8667       35.9833           96       183     2012      08        18        231              0.272583      29.557129       7.244613       0.260676   -9999.000000   -9999.000000       0.072900   -9999.000000
54817     54817     henan          115.8667       35.9833           96       183     2012      08        19        232              0.274167      28.221741       0.415862       0.299134       0.369000       0.122300       0.106700   -9999.000000
54817     54817     henan          115.8667       35.9833           96       183     2012      08        20        233              0.275333      29.704132       3.726781       0.284946   -9999.000000       0.055400       0.127500       0.760000
54817     54817     henan          115.8667       35.9833           96       183     2012      08        21        234              0.288458      27.104767       2.231827       0.293975       0.500000       0.226200       0.128700   -9999.000000
54817     54817     henan          115.8667       35.9833           96       183     2012      08        22        235              0.290667      25.070007       0.000000       0.300510       0.468500   -9999.000000   -9999.000000   -9999.000000
54817     54817     henan          115.8667       35.9833           96       183     2012      08        23        236              0.281167      26.011810       0.000000       0.278039       0.450500       0.229900       0.091400   -9999.000000
54817     54817     henan          115.8667       35.9833           96       183     2012      08        24        237              0.271167      25.229736       0.000000       0.263963       0.408000       0.072600       0.121100       0.734000
54817     54817     henan          115.8667       35.9833           96       183     2012      08        25        238              0.000000      26.785706       0.000000       0.251504       0.500000       0.231300       0.144500       0.566000
54817     54817     henan          115.8667       35.9833           96       183     2012      08        26        239              0.329292      28.382416       3.189379       0.240180       0.500000       0.194100       0.123700       0.601000
54817     54817     henan          115.8667       35.9833           96       183     2012      08        27        240              0.345500      28.460663       0.099165       0.259946       0.424500       0.116700       0.099600       0.580000
54817     54817     henan          115.8667       35.9833           96       183     2012      08        28        241              0.331792      27.472656       0.000000       0.258987       0.469500       0.103400   -9999.000000   -9999.000000
54817     54817     henan          115.8667       35.9833           96       183     2012      08        29        242              0.319417      28.955261       0.056763       0.244697       0.407000   -9999.000000       0.042700       0.774000
54817     54817     henan          115.8667       35.9833           96       183     2012      08        30        243              0.309958      31.281555       0.000000       0.231058       0.439000   -9999.000000       0.116500       0.651000
54817     54817     henan          115.8667       35.9833           96       183     2012      08        31        244              0.303304      31.048035       0.000000       0.220874       0.500000       0.044900       0.088600       0.628000
54817     54817     henan          115.8667       35.9833           96       183     2012      09        01        245              0.297292      30.200012       1.158115       0.215678       0.274500       0.240800       0.101600       0.478000
54817     54817     henan          115.8667       35.9833           96       183     2012      09        02        246              0.295667      29.907196       2.482931       0.213225       0.328000       0.449000   -9999.000000   -9999.000000
54817     54817     henan          115.8667       35.9833           96       183     2012      09        03        247              0.293478      25.705719       2.064756       0.247395       0.222000       0.105100       0.152400       0.722000
54817     54817     henan          115.8667       35.9833           96       183     2012      09        04        248              0.283667      26.010864       0.000000       0.222984       0.232000   -9999.000000       0.105700       0.529000
54817     54817     henan          115.8667       35.9833           96       183     2012      09        05        249              0.278833      25.513306       0.145956       0.206710       0.332000       0.256500       0.149800       0.619000
54817     54817     henan          115.8667       35.9833           96       183     2012      09        06        250              0.277375      25.286682       3.430557       0.204259   -9999.000000       0.229000       0.123500       0.503000
54817     54817     henan          115.8667       35.9833           96       183     2012      09        07        251              0.277500      27.570374       0.000000       0.214771       0.321000       0.123000       0.140300   -9999.000000
54817     54817     henan          115.8667       35.9833           96       183     2012      09        08        252              0.275375      25.241577       0.367551       0.233087       0.302000   -9999.000000   -9999.000000       0.613000
54817     54817     henan          115.8667       35.9833           96       183     2012      09        09        253              0.271042      25.979218       0.000000       0.215416       0.238000   -9999.000000       0.100000       0.645000
54817     54817     henan          115.8667       35.9833           96       183     2012      09        10        254              0.267458      26.190277       0.535268       0.204509   -9999.000000   -9999.000000       0.160800       0.671000
54817     54817     henan          115.8667       35.9833           96       183     2012      09        11        255              0.283833      27.317932       8.447745       0.198908       0.309000   -9999.000000       0.184800       0.627000
54817     54817     henan          115.8667       35.9833           96       183     2012      09        12        256              0.294042      23.038757       0.811835       0.279189       0.211500       0.129000       0.150800   -9999.000000
54817     54817     henan          115.8667       35.9833           96       183     2012      09        13        257              0.289542      21.792755       2.553196       0.256073       0.238000       0.156200       0.141100       0.577000
54817     54817     henan          115.8667       35.9833           96       183     2012      09        14        258              0.281042      22.762970       0.000000       0.232380       0.189000   -9999.000000   -9999.000000   -9999.000000
54817     54817     henan          115.8667       35.9833           96       183     2012      09        15        259              0.274500      22.790588       0.000000       0.215560   -9999.000000       0.096400       0.054900       0.627000
54817     54817     henan          115.8667       35.9833           96       183     2012      09        16        260              0.268833      23.494507       0.000000       0.202977   -9999.000000   -9999.000000       0.179400       0.518000
54817     54817     henan          115.8667       35.9833           96       183     2012      09        17        261              0.261125      23.739868       0.720682       0.195632       0.282000   -9999.000000       0.126400   -9999.000000
54817     54817     henan          115.8667       35.9833           96       183     2012      09        18        262              0.255333      24.334656       0.000000       0.189032       0.245500       0.110500       0.137300       0.593000
54817     54817     henan          115.8667       35.9833           96       183     2012      09        19        263              0.262417      25.763641       9.445942       0.184550       0.239000   -9999.000000   -9999.000000   -9999.000000
54817     54817     henan          115.8667       35.9833           96       183     2012      09        20        264              0.281333      23.889862       1.893386       0.252336       0.202000       0.275200       0.151700       0.774000
54817     54817     henan          115.8667       35.9833           96       183     2012      09        21        265              0.281833      24.009583       0.297467       0.261303   -9999.000000       0.135800       0.120300   -9999.000000
54817     54817     henan          115.8667       35.9833           96       183     2012      09        22        266              0.279333      24.304230       0.000000       0.252106       0.251000   -9999.000000       0.167900       0.915000
54817     54817     henan          115.8667       35.9833           96       183     2012      09        23        267              0.275000      24.766418       0.000000       0.234606       0.176500       0.039000       0.137700       0.739000
54817     54817     henan          115.8667       35.9833           96       183     2012      09        24        268              0.270125      24.445923       0.300935       0.222640       0.203000       0.180300       0.177700       0.722000
54817     54817     henan          115.8667       35.9833           96       183     2012      09        25        269              0.266542      25.088898       2.543938       0.210716       0.183000       0.075600   -9999.000000       0.824000
54817     54817     henan          115.8667       35.9833           96       183     2012      09        26        270              0.262750      25.462189       0.980777       0.218463       0.230000   -9999.000000       0.119400   -9999.000000
54817     54817     henan          115.8667       35.9833           96       183     2012      09        27        271              0.262500      22.208588       1.392656       0.243552   -9999.000000   -9999.000000       0.205100       0.884000
54817     54817     henan          115.8667       35.9833           96       183     2012      09        28        272              0.250200      22.718811       0.000000       0.233155   -9999.000000   -9999.000000       0.168400       0.609000
54817     54817     henan          115.8667       35.9833           96       183     2012      09        29        273              0.245833      19.718475       1.022140       0.217050       0.205000   -9999.000000       0.182000       0.823000
54817     54817     henan          115.8667       35.9833           96       183     2012      09        30        274              0.240958      19.937042       0.000000       0.204434       0.188000   -9999.000000       0.185200       0.489000
54817     54817     henan          115.8667       35.9833           96       183     2012      10        01        275              0.236833      20.416779       0.000000       0.196586       0.143000   -9999.000000   -9999.000000   -9999.000000
54817     54817     henan          115.8667       35.9833           96       183     2012      10        02        276              0.233542      22.275940       0.000000       0.190394       0.184000   -9999.000000       0.068400       0.715000
54817     54817     henan          115.8667       35.9833           96       183     2012      10        03        277              0.230000      23.440460       0.294757       0.185487       0.175000       0.138300       0.136900       0.450000
54817     54817     henan          115.8667       35.9833           96       183     2012      10        04        278              0.225583      23.863922       0.451724       0.182792       0.163000       0.089700       0.130200       0.665000
54817     54817     henan          115.8667       35.9833           96       183     2012      10        05        279              0.221625      23.239105       0.429065       0.181082       0.168000       0.236400       0.134400       0.349000
54817     54817     henan          115.8667       35.9833           96       183     2012      10        06        280              0.219917      21.622162       0.075829       0.189399       0.156000       0.180900   -9999.000000   -9999.000000
54817     54817     henan          115.8667       35.9833           96       183     2012      10        07        281              0.218542      22.233978       0.000000       0.184161   -9999.000000       0.182200       0.116000       0.396000
54817     54817     henan          115.8667       35.9833           96       183     2012      10        08        282              0.217375      22.779419       0.134774       0.181896       0.180000   -9999.000000       0.101000       0.441000
54817     54817     henan          115.8667       35.9833           96       183     2012      10        09        283              0.222958      23.642761       0.000000       0.179559       0.141500       0.169800       0.116400       0.661000
54817     54817     henan          115.8667       35.9833           96       183     2012      10        10        284              0.228458      21.848755       0.963971       0.176624       0.162500   -9999.000000       0.102900       0.313000
54817     54817     henan          115.8667       35.9833           96       183     2012      10        11        285              0.227833      19.722015       0.243939       0.173786       0.105000       0.220300       0.106500   -9999.000000
54817     54817     henan          115.8667       35.9833           96       183     2012      10        12        286              0.229792      21.066376       0.000000       0.173563       0.105000       0.289100   -9999.000000       0.371000
54817     54817     henan          115.8667       35.9833           96       183     2012      10        13        287              0.230000      22.239227       0.118068       0.173173       0.130000       0.188600       0.049200   -9999.000000
54817     54817     henan          115.8667       35.9833           96       183     2012      10        14        288              0.229208      21.942139       0.399384       0.173134       0.127000   -9999.000000       0.114400       0.486000
54817     54817     henan          115.8667       35.9833           96       183     2012      10        15        289              0.234000      21.373016       4.279718       0.175930       0.137500   -9999.000000       0.086800       0.350000
54817     54817     henan          115.8667       35.9833           96       183     2012      10        16        290              0.229333      21.632233       1.925611       0.192400       0.153000   -9999.000000       0.131500   -9999.000000
54817     54817     henan          115.8667       35.9833           96       183     2012      10        17        291              0.227125      16.506561       0.000000       0.254244       0.112000       0.245700   -9999.000000       0.442000
54817     54817     henan          115.8667       35.9833           96       183     2012      10        18        292              0.228167      15.918182       0.310119       0.227595   -9999.000000       0.196700   -9999.000000   -9999.000000
54817     54817     henan          115.8667       35.9833           96       183     2012      10        19        293              0.230333      17.704895       0.253430       0.213760       0.138000       0.143200       0.054100       0.438000
54817     54817     henan          115.8667       35.9833           96       183     2012      10        20        294              0.230958      18.087097       0.350471       0.205515       0.104000   -9999.000000       0.105300   -9999.000000
54817     54817     henan          115.8667       35.9833           96       183     2012      10        21        295              0.232250      19.511444       5.614254       0.197934       0.121000       0.280600       0.098100       0.538000
54817     54817     henan          115.8667       35.9833           96       183     2012      10        22        296              0.228792      18.037170       0.868448       0.234670   -9999.000000       0.235500       0.095300       0.481000
54817     54817     henan          115.8667       35.9833           96       183     2012      10        23        297              0.228917      15.217041       0.368578       0.244244   -9999.000000       0.226200   -9999.000000       0.676000
54817     54817     henan          115.8667       35.9833           96       183     2012      10        24        298              0.231375      15.949615       0.315982       0.228502   -9999.000000       0.232300       0.067100       0.480000
54817     54817     henan          115.8667       35.9833           96       183     2012      10        25        299              0.000000      17.408325       0.111667       0.217723       0.137000   -9999.000000       0.083200   -9999.000000
54817     54817     henan          115.8667       35.9833           96       183     2012      10        26        300              0.231458      17.990601       0.353971       0.209737       0.139000       0.158700       0.110700       0.603000
54817     54817     henan          115.8667       35.9833           96       183     2012      10        27        301              0.232917      16.432068       0.373582       0.210184       0.109000       0.112200       0.082300       0.460000
54817     54817     henan          115.8667       35.9833           96       183     2012      10        28        302              0.000000      17.068695       0.425016       0.206522       0.115000   -9999.000000       0.082400       0.696000
54817     54817     henan          115.8667       35.9833           96       183     2012      10        29        303              0.235667      17.736023       0.395888       0.200750       0.139000       0.134400   -9999.000000       0.456000
54817     54817     henan          115.8667       35.9833           96       183     2012      10        30        304              0.232917      17.310150       0.000000       0.196567   -9999.000000       0.257100       0.011300   -9999.000000
54817     54817     henan          115.8667       35.9833           96       183     2012      10        31        305              0.228875      14.202393       1.337488       0.191904       0.098000   -9999.000000       0.090000       0.528000
54817     54817     henan          115.8667       35.9833           96       183     2012      11        01        306              0.228583      12.531677       0.228004       0.189424       0.110500       0.142600       0.077300       0.449000
54817     54817     henan          115.8667       35.9833           96       183     2012      11        02        307              0.229417      13.826233       0.000000       0.188099       0.100000   -9999.000000       0.082800       0.640000
54817     54817     henan          115.8667       35.9833           96       183     2012      11        03        308              0.226458      15.130920       0.648137       0.186521   -9999.000000       0.263900   -9999.000000       0.787000
54817     54817     henan          115.8667       35.9833           96       183     2012      11        04        309              0.223458      10.837036       0.179238       0.195737   -9999.000000       0.197900       0.099300   -9999.000000
54817     54817     henan          115.8667       35.9833           96       183     2012      11        05        310              0.222958       9.020050       0.000000       0.194732       0.079000       0.273500       0.059400       0.299000
54817     54817     henan          115.8667       35.9833           96       183     2012      11        06        311              0.222625       9.551514       0.423912       0.191226       0.109000       0.253400       0.093900       0.478000
54817     54817     henan          115.8667       35.9833           96       183     2012      11        07        312              0.224417      11.108398       0.000000       0.190287       0.103000   -9999.000000       0.083500       0.647000
54817     54817     henan          115.8667       35.9833           96       183     2012      11        08        313              0.224208      12.082794       0.000000       0.189197       0.110000       0.299200   -9999.000000       0.267000
54817     54817     henan          115.8667       35.9833           96       183     2012      11        09        314              0.224167      12.021088       2.184510       0.186954       0.173000       0.156200   -9999.000000   -9999.000000
54817     54817     henan          115.8667       35.9833           96       183     2012      11        10        315              0.223458      12.386047       0.494199       0.187992   -9999.000000       0.201300       0.105400       0.836000
54817     54817     henan          115.8667       35.9833           96       183     2012      11        11        316              0.218875       8.537598       0.000000       0.197263       0.136000   -9999.000000       0.103400   -9999.000000
54817     54817     henan          115.8667       35.9833           96       183     2012      11        12        317              0.218875       7.697144       0.250263       0.192683       0.124000   -9999.000000       0.077700       0.457000
54817     54817     henan          115.8667       35.9833           96       183     2012      11        13        318              0.000000       8.169739       0.000000       0.189232       0.114000       0.142800       0.082900   -9999.000000
54817     54817     henan          115.8667       35.9833           96       183     2012      11        14        319              0.217750       6.986237       0.000000       0.186497   -9999.000000       0.160600       0.084900   -9999.000000
54817     54817     henan          115.8667       35.9833           96       183     2012      11        15        320              0.219458       6.823486       0.276972       0.184460   -9999.000000   -9999.000000   -9999.000000       0.419000
54817     54817     henan          115.8667       35.9833           96       183     2012      11        16        321              0.220000       8.119904       0.000000       0.184718       0.079000       0.208300       0.027100   -9999.000000
54817     54817     henan          115.8667       35.9833           96       183     2012      11        17        322              0.000000       8.073700       0.744087       0.185966       0.115000   -9999.000000       0.096300       0.436000
54817     54817     henan          115.8667       35.9833           96       183     2012      11        18        323              0.219833       9.092896       0.000000       0.190170       0.113000   -9999.000000       0.073700   -9999.000000
54817     54817     henan          115.8667       35.9833           96       183     2012      11        19        324              0.219000       9.444122       0.000000       0.190853       0.116000       0.143200       0.091300       0.446000
54817     54817     henan          115.8667       35.9833           96       183     2012      11        20        325              0.220292       7.828644       0.059227       0.187891       0.140000   -9999.000000   -9999.000000       0.402000
54817     54817     henan          115.8667       35.9833           96       183     2012      11        21        326              0.221375       8.170197       0.206698       0.187086   -9999.000000       0.287400       0.090100       0.649000
54817     54817     henan          115.8667       35.9833           96       183     2012      11        22        327              0.220917       9.610687       0.000000       0.187624       0.113000       0.108600       0.068500       0.396000
54817     54817     henan          115.8667       35.9833           96       183     2012      11        23        328              0.217500       7.853668       0.000000       0.188968       0.104000       0.185700       0.093100   -9999.000000
54817     54817     henan          115.8667       35.9833           96       183     2012      11        24        329              0.216375       4.585632       0.172508       0.188188       0.108000       0.119100       0.077400       0.503000
54817     54817     henan          115.8667       35.9833           96       183     2012      11        25        330              0.216750       6.688721       1.493938       0.187704   -9999.000000   -9999.000000       0.106900       0.690000
54817     54817     henan          115.8667       35.9833           96       183     2012      11        26        331              0.217391       4.762207       0.000000       0.208212   -9999.000000   -9999.000000   -9999.000000       0.677000
54817     54817     henan          115.8667       35.9833           96       183     2012      11        27        332              0.216542       5.629303       0.000000       0.203616       0.103000       0.225400       0.026400       0.433000
54817     54817     henan          115.8667       35.9833           96       183     2012      11        28        333              0.215417       7.413300       0.000000       0.199180       0.099000       0.177500       0.087700   -9999.000000
54817     54817     henan          115.8667       35.9833           96       183     2012      11        29        334              0.213833       4.758026       0.077030       0.194385       0.106000       0.233300       0.077800       0.517000
54817     54817     henan          115.8667       35.9833           96       183     2012      11        30        335              0.212792       4.559540       0.000000       0.192571   -9999.000000   -9999.000000       0.086700       0.413000
54817     54817     henan          115.8667       35.9833           96       183     2012      12        01        336              0.211833       3.532196       0.218176       0.191511   -9999.000000   -9999.000000   -9999.000000       0.573000
54817     54817     henan          115.8667       35.9833           96       183     2012      12        02        337              0.214333       2.173309       3.647739       0.192141   -9999.000000       0.198500   -9999.000000       0.311000
54817     54817     henan          115.8667       35.9833           96       183     2012      12        03        338              0.212708       3.551453       0.000000       0.194858       0.096000   -9999.000000       0.030600   -9999.000000
54817     54817     henan          115.8667       35.9833           96       183     2012      12        04        339              0.211458       3.059204       0.111887       0.190521       0.098000       0.408400       0.092000       0.191000
54817     54817     henan          115.8667       35.9833           96       183     2012      12        05        340              0.210458       3.216949       0.000000       0.189404       0.103000       0.298200       0.072200       0.249000
54817     54817     henan          115.8667       35.9833           96       183     2012      12        06        341              0.209043       1.869049       0.000000       0.185347   -9999.000000       0.121800       0.079400       0.504000
54817     54817     henan          115.8667       35.9833           96       183     2012      12        07        342              0.208750       1.613281       0.271613       0.184604   -9999.000000       0.141300   -9999.000000       0.074000
54817     54817     henan          115.8667       35.9833           96       183     2012      12        08        343              0.207250       0.910278       0.000000       0.182830   -9999.000000   -9999.000000       0.053500   -9999.000000
54817     54817     henan          115.8667       35.9833           96       183     2012      12        09        344              0.205875      -0.806274       0.150893       0.177367       0.103000   -9999.000000       0.064200       0.134000
54817     54817     henan          115.8667       35.9833           96       183     2012      12        10        345              0.205500      -0.589874       0.000000       0.176737   -9999.000000       0.149100       0.076000   -9999.000000
54817     54817     henan          115.8667       35.9833           96       183     2012      12        11        346              0.205375       0.120148       0.270851       0.178773   -9999.000000       0.131400       0.068800       0.193000
54817     54817     henan          115.8667       35.9833           96       183     2012      12        12        347              0.205792      -0.806976       0.000000       0.178024   -9999.000000       0.116100       0.080300   -9999.000000
54817     54817     henan          115.8667       35.9833           96       183     2012      12        13        348              0.208000       1.008087       1.572787       0.184592       0.151000   -9999.000000   -9999.000000   -9999.000000
54817     54817     henan          115.8667       35.9833           96       183     2012      12        14        349              0.208000       0.980530       0.896236       0.190064       0.132000   -9999.000000       0.047800       0.365000
54817     54817     henan          115.8667       35.9833           96       183     2012      12        15        350              0.000000       0.304382       0.700767       0.192475   -9999.000000   -9999.000000       0.124200   -9999.000000
54817     54817     henan          115.8667       35.9833           96       183     2012      12        16        351              0.215625       1.184387       0.346822       0.201643   -9999.000000   -9999.000000   -9999.000000       0.671000
54817     54817     henan          115.8667       35.9833           96       183     2012      12        17        352              0.220500       1.388550       0.332202       0.206490   -9999.000000   -9999.000000       0.085700   -9999.000000
54817     54817     henan          115.8667       35.9833           96       183     2012      12        18        353              0.221542       0.815491       0.000000       0.199840   -9999.000000   -9999.000000   -9999.000000       0.469000
54817     54817     henan          115.8667       35.9833           96       183     2012      12        19        354              0.222000      -0.313812       0.000000       0.190935   -9999.000000       0.248200       0.088700       0.305000
54817     54817     henan          115.8667       35.9833           96       183     2012      12        20        355              0.000000      -0.739990       1.042656       0.189261   -9999.000000       0.102000       0.036600       0.524000
54817     54817     henan          115.8667       35.9833           96       183     2012      12        21        356              0.225000      -0.241333       0.860673       0.192206   -9999.000000   -9999.000000       0.078600       0.168000
54817     54817     henan          115.8667       35.9833           96       183     2012      12        22        357              0.226417      -1.236237       0.296045       0.187186   -9999.000000       0.225500       0.067300   -9999.000000
54817     54817     henan          115.8667       35.9833           96       183     2012      12        23        358              0.226833      -1.908936       0.254504       0.183407   -9999.000000       0.079500   -9999.000000       0.285000
54817     54817     henan          115.8667       35.9833           96       183     2012      12        24        359              0.225000      -4.692413       0.325600       0.167647   -9999.000000       0.052600   -9999.000000       0.134000
54817     54817     henan          115.8667       35.9833           96       183     2012      12        25        360              0.223125      -3.427094       0.054627       0.172071   -9999.000000       0.176500       0.023200       0.277000
54817     54817     henan          115.8667       35.9833           96       183     2012      12        26        361              0.000000      -4.029541       0.000000       0.170295   -9999.000000   -9999.000000       0.064000       0.144000
54817     54817     henan          115.8667       35.9833           96       183     2012      12        27        362              0.221000      -2.858856       0.000000       0.175038   -9999.000000       0.176300       0.079900   -9999.000000
54817     54817     henan          115.8667       35.9833           96       183     2012      12        28        363              0.222000      -0.986755       2.215200       0.186217   -9999.000000       0.076500       0.090800       0.338000
54817     54817     henan          115.8667       35.9833           96       183     2012      12        29        364              0.000000      -1.049133       0.000000       0.188692   -9999.000000       0.104900   -9999.000000   -9999.000000
54817     54817     henan          115.8667       35.9833           96       183     2012      12        30        365              0.000000      -3.314789       0.000000       0.175754   -9999.000000       0.203900   -9999.000000       0.287000
54817     54817     henan          115.8667       35.9833           96       183     2012      12        31        366              0.214533      -2.063293       0.000000       0.179806   -9999.000000   -9999.000000       0.010000   -9999.000000
