# Supplementary material for: Research on Fusing Multisatellite Soil Moisture Data Based on Bayesian Model Averaging
Source: Hindawi journal article supplement (doi:10.1155/2018/9310838), 2018-06-25
Supplement: f1 [file 9310838.f1.zip › 2012_sm00-10cm_daily_ZDB_ZHY_55591_366days_allin.txt]

55591     55591     xizang         91.0800        29.3997          122        84     2012      01        01        001              0.000000   -9999.000000       0.000000   -9999.000000   -9999.000000   -9999.000000       0.065800   -9999.000000
55591     55591     xizang         91.0800        29.3997          122        84     2012      01        02        002              0.015833       2.493927       1.301022       0.160808   -9999.000000   -9999.000000       0.062200   -9999.000000
55591     55591     xizang         91.0800        29.3997          122        84     2012      01        03        003              0.000000      -0.263367       0.000000       0.147403   -9999.000000   -9999.000000   -9999.000000       0.103000
55591     55591     xizang         91.0800        29.3997          122        84     2012      01        04        004              0.016333      -0.448883       0.462300       0.140299   -9999.000000   -9999.000000   -9999.000000   -9999.000000
55591     55591     xizang         91.0800        29.3997          122        84     2012      01        05        005              0.016000      -1.701233       0.000000       0.129699   -9999.000000   -9999.000000   -9999.000000   -9999.000000
55591     55591     xizang         91.0800        29.3997          122        84     2012      01        06        006              0.015750      -1.668243       0.000000       0.129533   -9999.000000   -9999.000000       0.063600       0.008000
55591     55591     xizang         91.0800        29.3997          122        84     2012      01        07        007              0.015583      -1.588379       0.000000       0.130086   -9999.000000   -9999.000000       0.062800   -9999.000000
55591     55591     xizang         91.0800        29.3997          122        84     2012      01        08        008              0.000000      -1.167480       0.000000       0.131978   -9999.000000   -9999.000000       0.063300       0.025000
55591     55591     xizang         91.0800        29.3997          122        84     2012      01        09        009              0.015792      -0.345520       0.000000       0.137082   -9999.000000   -9999.000000   -9999.000000   -9999.000000
55591     55591     xizang         91.0800        29.3997          122        84     2012      01        10        010              0.015500       0.375244       0.000000       0.143472   -9999.000000   -9999.000000   -9999.000000       0.015000
55591     55591     xizang         91.0800        29.3997          122        84     2012      01        11        011              0.015167       0.241486       0.000000       0.141757   -9999.000000   -9999.000000   -9999.000000       0.032000
55591     55591     xizang         91.0800        29.3997          122        84     2012      01        12        012              0.015125      -1.112183       0.000000       0.132580   -9999.000000   -9999.000000       0.060400   -9999.000000
55591     55591     xizang         91.0800        29.3997          122        84     2012      01        13        013              0.014917      -1.569550       0.000000       0.128384   -9999.000000   -9999.000000       0.061500       0.022000
55591     55591     xizang         91.0800        29.3997          122        84     2012      01        14        014              0.014708      -4.723724       0.000000       0.109941   -9999.000000   -9999.000000       0.058100   -9999.000000
55591     55591     xizang         91.0800        29.3997          122        84     2012      01        15        015              0.014792      -4.998901       0.000000       0.108309   -9999.000000   -9999.000000   -9999.000000       0.089000
55591     55591     xizang         91.0800        29.3997          122        84     2012      01        16        016              0.014792      -3.582825       0.000000       0.116934   -9999.000000   -9999.000000   -9999.000000       0.181000
55591     55591     xizang         91.0800        29.3997          122        84     2012      01        17        017              0.000000      -1.388153       0.000000       0.128203   -9999.000000   -9999.000000   -9999.000000   -9999.000000
55591     55591     xizang         91.0800        29.3997          122        84     2012      01        18        018              0.014958       0.204346       0.000000       0.139045   -9999.000000   -9999.000000       0.061700       0.072000
55591     55591     xizang         91.0800        29.3997          122        84     2012      01        19        019              0.015083       0.322144       0.000000       0.138874   -9999.000000   -9999.000000       0.065400   -9999.000000
55591     55591     xizang         91.0800        29.3997          122        84     2012      01        20        020              0.014875       0.530243       0.000000       0.140357   -9999.000000   -9999.000000   -9999.000000       0.041000
55591     55591     xizang         91.0800        29.3997          122        84     2012      01        21        021              0.014792      -0.210510       9.034915       0.135534   -9999.000000   -9999.000000   -9999.000000   -9999.000000
55591     55591     xizang         91.0800        29.3997          122        84     2012      01        22        022              0.014792       0.033600       0.000000       0.135811       0.098000   -9999.000000   -9999.000000       0.012000
55591     55591     xizang         91.0800        29.3997          122        84     2012      01        23        023              0.014875       0.231812       0.000000       0.136346       0.114000   -9999.000000       0.063300       0.059000
55591     55591     xizang         91.0800        29.3997          122        84     2012      01        24        024              0.015000       0.654327      10.563457       0.138266       0.119000   -9999.000000       0.061900   -9999.000000
55591     55591     xizang         91.0800        29.3997          122        84     2012      01        25        025              0.014870       1.211609       6.722462       0.141426       0.127000   -9999.000000       0.065900       0.076000
55591     55591     xizang         91.0800        29.3997          122        84     2012      01        26        026              0.015091       1.560425       0.000000       0.142912   -9999.000000   -9999.000000   -9999.000000   -9999.000000
55591     55591     xizang         91.0800        29.3997          122        84     2012      01        27        027              0.014826       2.837646       0.479531       0.148420   -9999.000000   -9999.000000   -9999.000000       0.047000
55591     55591     xizang         91.0800        29.3997          122        84     2012      01        28        028              0.014708       2.087646       1.890062       0.143592       0.113000   -9999.000000   -9999.000000       0.021000
55591     55591     xizang         91.0800        29.3997          122        84     2012      01        29        029              0.014708       1.349518       7.470911       0.139071       0.112000   -9999.000000       0.064900   -9999.000000
55591     55591     xizang         91.0800        29.3997          122        84     2012      01        30        030              0.014708       1.452911       0.498289       0.139027       0.119000   -9999.000000       0.060900       0.084000
55591     55591     xizang         91.0800        29.3997          122        84     2012      01        31        031              0.014667       0.817963       0.000000       0.135729   -9999.000000   -9999.000000       0.061800   -9999.000000
55591     55591     xizang         91.0800        29.3997          122        84     2012      02        01        032              0.014875       0.932251       0.000000       0.135316   -9999.000000   -9999.000000   -9999.000000       0.007000
55591     55591     xizang         91.0800        29.3997          122        84     2012      02        02        033              0.014708       1.695618       0.061947       0.139700       0.106000   -9999.000000   -9999.000000   -9999.000000
55591     55591     xizang         91.0800        29.3997          122        84     2012      02        03        034              0.014458       0.869049       0.000000       0.134812   -9999.000000   -9999.000000   -9999.000000   -9999.000000
55591     55591     xizang         91.0800        29.3997          122        84     2012      02        04        035              0.014708      -0.259552       0.000000       0.130862       0.112000   -9999.000000       0.063700       0.156000
55591     55591     xizang         91.0800        29.3997          122        84     2012      02        05        036              0.014917       0.349030       0.000000       0.134713   -9999.000000   -9999.000000       0.065300   -9999.000000
55591     55591     xizang         91.0800        29.3997          122        84     2012      02        06        037              0.014875       2.749847       0.000000       0.143282   -9999.000000   -9999.000000   -9999.000000       0.084000
55591     55591     xizang         91.0800        29.3997          122        84     2012      02        07        038              0.014958       4.261230       0.000000       0.148260       0.093000   -9999.000000   -9999.000000   -9999.000000
55591     55591     xizang         91.0800        29.3997          122        84     2012      02        08        039              0.015125       5.594299       0.000000       0.153242   -9999.000000   -9999.000000   -9999.000000       0.128000
55591     55591     xizang         91.0800        29.3997          122        84     2012      02        09        040              0.015208       4.609467       0.000000       0.152789   -9999.000000   -9999.000000       0.067400       0.161000
55591     55591     xizang         91.0800        29.3997          122        84     2012      02        10        041              0.014875       3.387054       0.000000       0.148320   -9999.000000   -9999.000000       0.064300   -9999.000000
55591     55591     xizang         91.0800        29.3997          122        84     2012      02        11        042              0.014667       3.323792       0.000000       0.144346   -9999.000000   -9999.000000       0.065600       0.084000
55591     55591     xizang         91.0800        29.3997          122        84     2012      02        12        043              0.014750       2.755920       0.000000       0.140433   -9999.000000   -9999.000000   -9999.000000   -9999.000000
55591     55591     xizang         91.0800        29.3997          122        84     2012      02        13        044              0.014833       3.225891       0.000000       0.143309       0.104000   -9999.000000   -9999.000000       0.102000
55591     55591     xizang         91.0800        29.3997          122        84     2012      02        14        045              0.014917       4.522461       0.000000       0.147629       0.105000   -9999.000000   -9999.000000       0.186000
55591     55591     xizang         91.0800        29.3997          122        84     2012      02        15        046              0.014958       6.089569       0.000000       0.152380   -9999.000000   -9999.000000       0.063900   -9999.000000
55591     55591     xizang         91.0800        29.3997          122        84     2012      02        16        047              0.015000       5.333801       0.000000       0.151100   -9999.000000   -9999.000000       0.065000       0.045000
55591     55591     xizang         91.0800        29.3997          122        84     2012      02        17        048              0.014542       5.088959       0.000000       0.148741   -9999.000000   -9999.000000   -9999.000000   -9999.000000
55591     55591     xizang         91.0800        29.3997          122        84     2012      02        18        049              0.014667       2.122864       0.000000       0.137698       0.095000   -9999.000000   -9999.000000       0.186000
55591     55591     xizang         91.0800        29.3997          122        84     2012      02        19        050              0.014625       3.270752       0.380924       0.140641   -9999.000000   -9999.000000   -9999.000000   -9999.000000
55591     55591     xizang         91.0800        29.3997          122        84     2012      02        20        051              0.014500       2.748596       0.176352       0.142086       0.108000   -9999.000000   -9999.000000       0.187000
55591     55591     xizang         91.0800        29.3997          122        84     2012      02        21        052              0.014708       3.268219       0.000000       0.146275   -9999.000000   -9999.000000       0.065800       0.086000
55591     55591     xizang         91.0800        29.3997          122        84     2012      02        22        053              0.014792       4.622925       0.000000       0.149945   -9999.000000   -9999.000000       0.069100   -9999.000000
55591     55591     xizang         91.0800        29.3997          122        84     2012      02        23        054              0.014792       6.266388       0.000000       0.149320       0.098000   -9999.000000   -9999.000000       0.210000
55591     55591     xizang         91.0800        29.3997          122        84     2012      02        24        055              0.014750       7.184265       0.000000       0.149340       0.095000   -9999.000000   -9999.000000   -9999.000000
55591     55591     xizang         91.0800        29.3997          122        84     2012      02        25        056              0.014750       8.135620       0.000000       0.148849       0.101000   -9999.000000   -9999.000000       0.114000
55591     55591     xizang         91.0800        29.3997          122        84     2012      02        26        057              0.014458       8.414032       0.000000       0.147400   -9999.000000   -9999.000000       0.070500       0.141000
55591     55591     xizang         91.0800        29.3997          122        84     2012      02        27        058              0.014750       4.702118       0.000000       0.139580   -9999.000000   -9999.000000       0.065100   -9999.000000
55591     55591     xizang         91.0800        29.3997          122        84     2012      02        28        059              0.015050       6.600891       0.000000       0.142939       0.094000   -9999.000000       0.065300       0.237000
55591     55591     xizang         91.0800        29.3997          122        84     2012      02        29        060              0.000000   -9999.000000       0.000000   -9999.000000   -9999.000000   -9999.000000   -9999.000000   -9999.000000
55591     55591     xizang         91.0800        29.3997          122        84     2012      03        01        061              0.014542       7.365143       0.000000       0.143320   -9999.000000   -9999.000000   -9999.000000       0.096000
55591     55591     xizang         91.0800        29.3997          122        84     2012      03        02        062              0.014792       3.687286       1.290665       0.136954       0.121000   -9999.000000   -9999.000000   -9999.000000
55591     55591     xizang         91.0800        29.3997          122        84     2012      03        03        063              0.014667       4.384216       0.000000       0.140566   -9999.000000   -9999.000000       0.065900   -9999.000000
55591     55591     xizang         91.0800        29.3997          122        84     2012      03        04        064              0.015458       1.848938       0.000000       0.134395   -9999.000000   -9999.000000       0.067100       0.108000
55591     55591     xizang         91.0800        29.3997          122        84     2012      03        05        065              0.015792       3.287842       0.000000       0.138562       0.097000   -9999.000000   -9999.000000   -9999.000000
55591     55591     xizang         91.0800        29.3997          122        84     2012      03        06        066              0.015792       6.512146       0.000000       0.146195       0.098000   -9999.000000   -9999.000000       0.122000
55591     55591     xizang         91.0800        29.3997          122        84     2012      03        07        067              0.000000       9.851776       0.000000       0.147852       0.110000   -9999.000000   -9999.000000   -9999.000000
55591     55591     xizang         91.0800        29.3997          122        84     2012      03        08        068              0.015083       9.664642       0.000000       0.144479   -9999.000000   -9999.000000   -9999.000000       0.023000
55591     55591     xizang         91.0800        29.3997          122        84     2012      03        09        069              0.015000       8.767761       0.000000       0.141510   -9999.000000   -9999.000000       0.067200       0.190000
55591     55591     xizang         91.0800        29.3997          122        84     2012      03        10        070              0.014833       8.997528       0.000000       0.140153       0.098000   -9999.000000       0.068600   -9999.000000
55591     55591     xizang         91.0800        29.3997          122        84     2012      03        11        071              0.014792       8.670746       0.000000       0.138902       0.095000   -9999.000000   -9999.000000       0.070000
55591     55591     xizang         91.0800        29.3997          122        84     2012      03        12        072              0.014708       9.443634       0.000000       0.138581       0.107000   -9999.000000   -9999.000000   -9999.000000
55591     55591     xizang         91.0800        29.3997          122        84     2012      03        13        073              0.014500      10.249084       0.000000       0.138222   -9999.000000   -9999.000000   -9999.000000       0.152000
55591     55591     xizang         91.0800        29.3997          122        84     2012      03        14        074              0.014500       8.758514       0.000000       0.137367   -9999.000000   -9999.000000       0.056300       0.293000
55591     55591     xizang         91.0800        29.3997          122        84     2012      03        15        075              0.014333       7.845917       0.000000       0.136773   -9999.000000   -9999.000000       0.058800   -9999.000000
55591     55591     xizang         91.0800        29.3997          122        84     2012      03        16        076              0.014583       4.289459       0.584743       0.132854   -9999.000000   -9999.000000       0.062000       0.141000
55591     55591     xizang         91.0800        29.3997          122        84     2012      03        17        077              0.014583       3.219360       0.000000       0.133037       0.102000   -9999.000000   -9999.000000   -9999.000000
55591     55591     xizang         91.0800        29.3997          122        84     2012      03        18        078              0.014750       6.041168       0.000000       0.139618   -9999.000000   -9999.000000   -9999.000000       0.135000
55591     55591     xizang         91.0800        29.3997          122        84     2012      03        19        079              0.014750       6.640045       0.000000       0.142132   -9999.000000   -9999.000000   -9999.000000   -9999.000000
55591     55591     xizang         91.0800        29.3997          122        84     2012      03        20        080              0.014833       9.857025       0.000000       0.142598       0.081000   -9999.000000       0.064400       0.115000
55591     55591     xizang         91.0800        29.3997          122        84     2012      03        21        081              0.014750      12.316559       2.560645       0.140697       0.093000   -9999.000000       0.068600       0.170000
55591     55591     xizang         91.0800        29.3997          122        84     2012      03        22        082              0.014708      13.846436       0.000000       0.138009       0.095000   -9999.000000   -9999.000000   -9999.000000
55591     55591     xizang         91.0800        29.3997          122        84     2012      03        23        083              0.014542      14.099945       0.000000       0.135001       0.107000   -9999.000000   -9999.000000       0.229000
55591     55591     xizang         91.0800        29.3997          122        84     2012      03        24        084              0.014500      13.084351       4.786232       0.132782   -9999.000000   -9999.000000   -9999.000000   -9999.000000
55591     55591     xizang         91.0800        29.3997          122        84     2012      03        25        085              0.000000      13.646851       0.000000       0.132079   -9999.000000   -9999.000000       0.066000       0.183000
55591     55591     xizang         91.0800        29.3997          122        84     2012      03        26        086              0.014167      11.701935       0.046772       0.132171       0.084000   -9999.000000       0.054700       0.208000
55591     55591     xizang         91.0800        29.3997          122        84     2012      03        27        087              0.014417      10.382385       0.248420       0.133166       0.081000   -9999.000000       0.056100   -9999.000000
55591     55591     xizang         91.0800        29.3997          122        84     2012      03        28        088              0.014292      10.789886       2.678553       0.134381       0.114000   -9999.000000   -9999.000000       0.233000
55591     55591     xizang         91.0800        29.3997          122        84     2012      03        29        089              0.015708      12.497955       0.000000       0.133832   -9999.000000   -9999.000000   -9999.000000   -9999.000000
55591     55591     xizang         91.0800        29.3997          122        84     2012      03        30        090              0.015583      10.474792       0.000000       0.133637   -9999.000000   -9999.000000   -9999.000000       0.133000
55591     55591     xizang         91.0800        29.3997          122        84     2012      03        31        091              0.015167       9.233704       0.000000       0.131307       0.073000   -9999.000000       0.054800   -9999.000000
55591     55591     xizang         91.0800        29.3997          122        84     2012      04        01        092              0.014833       8.886108       0.000000       0.130508       0.078000   -9999.000000       0.052000   -9999.000000
55591     55591     xizang         91.0800        29.3997          122        84     2012      04        02        093              0.014833      10.422211       1.128839       0.130879       0.095000   -9999.000000       0.068900       0.297000
55591     55591     xizang         91.0800        29.3997          122        84     2012      04        03        094              0.014792      12.675262       0.502933       0.131616   -9999.000000   -9999.000000   -9999.000000   -9999.000000
55591     55591     xizang         91.0800        29.3997          122        84     2012      04        04        095              0.014609      13.610077       0.707391       0.132134   -9999.000000   -9999.000000   -9999.000000       0.235000
55591     55591     xizang         91.0800        29.3997          122        84     2012      04        05        096              0.014458      11.449707       0.251434       0.133378   -9999.000000   -9999.000000   -9999.000000   -9999.000000
55591     55591     xizang         91.0800        29.3997          122        84     2012      04        06        097              0.015208       8.231384       1.287575       0.139625       0.092000   -9999.000000       0.074400       0.197000
55591     55591     xizang         91.0800        29.3997          122        84     2012      04        07        098              0.015667       8.487671       0.115564       0.141205   -9999.000000   -9999.000000       0.080100       0.390000
55591     55591     xizang         91.0800        29.3997          122        84     2012      04        08        099              0.016583       6.372681       1.617156       0.141982   -9999.000000   -9999.000000   -9999.000000   -9999.000000
55591     55591     xizang         91.0800        29.3997          122        84     2012      04        09        100              0.016304       6.971039       0.738768       0.161248   -9999.000000   -9999.000000   -9999.000000       0.094000
55591     55591     xizang         91.0800        29.3997          122        84     2012      04        10        101              0.016292       6.578979       1.814834       0.166117   -9999.000000   -9999.000000   -9999.000000   -9999.000000
55591     55591     xizang         91.0800        29.3997          122        84     2012      04        11        102              0.015958       8.282440       0.332871       0.172403       0.075000   -9999.000000       0.062000       0.240000
55591     55591     xizang         91.0800        29.3997          122        84     2012      04        12        103              0.015708       9.779907       0.413184       0.171800       0.089000   -9999.000000       0.056000       0.382000
55591     55591     xizang         91.0800        29.3997          122        84     2012      04        13        104              0.015417      11.604523       1.437633       0.167013       0.103000   -9999.000000       0.061800   -9999.000000
55591     55591     xizang         91.0800        29.3997          122        84     2012      04        14        105              0.015042      12.934265       1.138213       0.171952   -9999.000000   -9999.000000   -9999.000000       0.024000
55591     55591     xizang         91.0800        29.3997          122        84     2012      04        15        106              0.014708      14.615845       0.120212       0.173106   -9999.000000   -9999.000000   -9999.000000   -9999.000000
55591     55591     xizang         91.0800        29.3997          122        84     2012      04        16        107              0.014708      13.206787       0.254484       0.166034       0.088000   -9999.000000   -9999.000000       0.193000
55591     55591     xizang         91.0800        29.3997          122        84     2012      04        17        108              0.014792      13.006744       0.162572       0.159535       0.094000   -9999.000000       0.055000   -9999.000000
55591     55591     xizang         91.0800        29.3997          122        84     2012      04        18        109              0.014750      14.864227       0.530727       0.152373       0.100000   -9999.000000   -9999.000000       0.170000
55591     55591     xizang         91.0800        29.3997          122        84     2012      04        19        110              0.014917      13.322418       0.488104       0.149100   -9999.000000   -9999.000000       0.063300       0.517000
55591     55591     xizang         91.0800        29.3997          122        84     2012      04        20        111              0.014875       9.699829       0.341581       0.155023   -9999.000000   -9999.000000   -9999.000000   -9999.000000
55591     55591     xizang         91.0800        29.3997          122        84     2012      04        21        112              0.015000      11.213684       1.714856       0.155893       0.081000   -9999.000000   -9999.000000       0.370000
55591     55591     xizang         91.0800        29.3997          122        84     2012      04        22        113              0.017875      12.123871       0.000000       0.163759       0.089000   -9999.000000   -9999.000000   -9999.000000
55591     55591     xizang         91.0800        29.3997          122        84     2012      04        23        114              0.017167      12.897308       0.000000       0.169562       0.098000   -9999.000000       0.060800       0.201000
55591     55591     xizang         91.0800        29.3997          122        84     2012      04        24        115              0.016583      14.756653       1.062380       0.155864   -9999.000000   -9999.000000       0.062900       0.243000
55591     55591     xizang         91.0800        29.3997          122        84     2012      04        25        116              0.000000      12.514465       1.110954       0.157571   -9999.000000   -9999.000000   -9999.000000   -9999.000000
55591     55591     xizang         91.0800        29.3997          122        84     2012      04        26        117              0.016000       9.634430       1.229743       0.166465       0.081000   -9999.000000   -9999.000000       0.327000
55591     55591     xizang         91.0800        29.3997          122        84     2012      04        27        118              0.016087      12.389343       1.118359       0.166910       0.074000   -9999.000000   -9999.000000   -9999.000000
55591     55591     xizang         91.0800        29.3997          122        84     2012      04        28        119              0.018708      12.215515       0.565412       0.167764   -9999.000000   -9999.000000       0.078100       0.418000
55591     55591     xizang         91.0800        29.3997          122        84     2012      04        29        120              0.027167      10.106445       1.073798       0.167579       0.104000   -9999.000000       0.069200   -9999.000000
55591     55591     xizang         91.0800        29.3997          122        84     2012      04        30        121              0.027417      12.243958       4.480469       0.161393   -9999.000000   -9999.000000       0.068900   -9999.000000
55591     55591     xizang         91.0800        29.3997          122        84     2012      05        01        122              0.026458      13.102966       0.000000       0.155173   -9999.000000   -9999.000000   -9999.000000       0.341000
55591     55591     xizang         91.0800        29.3997          122        84     2012      05        02        123              0.024917      12.433319       0.000000       0.149243       0.093000   -9999.000000   -9999.000000   -9999.000000
55591     55591     xizang         91.0800        29.3997          122        84     2012      05        03        124              0.023500      12.980743       0.000000       0.144671       0.087000   -9999.000000   -9999.000000       0.269000
55591     55591     xizang         91.0800        29.3997          122        84     2012      05        04        125              0.022750      12.649323       2.131377       0.141846   -9999.000000   -9999.000000       0.076200   -9999.000000
55591     55591     xizang         91.0800        29.3997          122        84     2012      05        05        126              0.023750       7.340454       0.000000       0.159812   -9999.000000   -9999.000000       0.071100       0.357000
55591     55591     xizang         91.0800        29.3997          122        84     2012      05        06        127              0.022625      11.394318       0.000000       0.162683   -9999.000000   -9999.000000       0.065300       0.369000
55591     55591     xizang         91.0800        29.3997          122        84     2012      05        07        128              0.021125      12.316589       4.294816       0.155222   -9999.000000   -9999.000000   -9999.000000   -9999.000000
55591     55591     xizang         91.0800        29.3997          122        84     2012      05        08        129              0.020333      12.627441       0.000000       0.162928       0.090000   -9999.000000   -9999.000000       0.250000
55591     55591     xizang         91.0800        29.3997          122        84     2012      05        09        130              0.019125      13.728668       5.633533       0.157674       0.104000   -9999.000000   -9999.000000   -9999.000000
55591     55591     xizang         91.0800        29.3997          122        84     2012      05        10        131              0.038708      16.343872       6.413698       0.150028   -9999.000000   -9999.000000       0.067100       0.376000
55591     55591     xizang         91.0800        29.3997          122        84     2012      05        11        132              0.127458      13.221527       0.779974       0.171616   -9999.000000   -9999.000000       0.080200       0.794000
55591     55591     xizang         91.0800        29.3997          122        84     2012      05        12        133              0.099667      13.313477       0.085014       0.212124       0.109000   -9999.000000   -9999.000000   -9999.000000
55591     55591     xizang         91.0800        29.3997          122        84     2012      05        13        134              0.085250      15.848511       0.000000       0.191683       0.094000   -9999.000000   -9999.000000       0.276000
55591     55591     xizang         91.0800        29.3997          122        84     2012      05        14        135              0.074833      17.945221       0.000000       0.172926       0.100000   -9999.000000   -9999.000000   -9999.000000
55591     55591     xizang         91.0800        29.3997          122        84     2012      05        15        136              0.067458      17.020813       0.491011       0.160947   -9999.000000   -9999.000000       0.067600       0.403000
55591     55591     xizang         91.0800        29.3997          122        84     2012      05        16        137              0.060875      17.762573       1.238438       0.153462   -9999.000000   -9999.000000       0.062800   -9999.000000
55591     55591     xizang         91.0800        29.3997          122        84     2012      05        17        138              0.055833      17.404022       0.000000       0.148657       0.085000   -9999.000000       0.066700       0.299000
55591     55591     xizang         91.0800        29.3997          122        84     2012      05        18        139              0.051500      15.345123       0.000000       0.145922       0.082000   -9999.000000   -9999.000000       0.398000
55591     55591     xizang         91.0800        29.3997          122        84     2012      05        19        140              0.046958      18.822205       0.000000       0.139878       0.085000   -9999.000000   -9999.000000   -9999.000000
55591     55591     xizang         91.0800        29.3997          122        84     2012      05        20        141              0.043125      20.529144       0.000000       0.134498       0.098000   -9999.000000   -9999.000000       0.433000
55591     55591     xizang         91.0800        29.3997          122        84     2012      05        21        142              0.039000      20.063690       0.000000       0.131867   -9999.000000   -9999.000000       0.067500   -9999.000000
55591     55591     xizang         91.0800        29.3997          122        84     2012      05        22        143              0.034957      21.185852       0.000000       0.129645       0.094000   -9999.000000       0.067200       0.370000
55591     55591     xizang         91.0800        29.3997          122        84     2012      05        23        144              0.031417      21.868011       0.064380       0.127939   -9999.000000   -9999.000000   -9999.000000       0.237000
55591     55591     xizang         91.0800        29.3997          122        84     2012      05        24        145              0.028500      22.723602       1.409255       0.126588       0.094500   -9999.000000   -9999.000000   -9999.000000
55591     55591     xizang         91.0800        29.3997          122        84     2012      05        25        146              0.000000      22.469940       0.271740       0.125945       0.103000   -9999.000000   -9999.000000       0.412000
55591     55591     xizang         91.0800        29.3997          122        84     2012      05        26        147              0.023875      22.170593       0.281574       0.127547   -9999.000000   -9999.000000   -9999.000000   -9999.000000
55591     55591     xizang         91.0800        29.3997          122        84     2012      05        27        148              0.022542      20.926361       2.203031       0.129577       0.093000   -9999.000000       0.067500       0.335000
55591     55591     xizang         91.0800        29.3997          122        84     2012      05        28        149              0.021167      21.536133       0.000000       0.128211       0.094500   -9999.000000       0.067200   -9999.000000
55591     55591     xizang         91.0800        29.3997          122        84     2012      05        29        150              0.019762      23.029114       0.831491       0.125485       0.089500   -9999.000000   -9999.000000   -9999.000000
55591     55591     xizang         91.0800        29.3997          122        84     2012      05        30        151              0.019417      21.847321       1.130813       0.124885       0.095000   -9999.000000   -9999.000000   -9999.000000
55591     55591     xizang         91.0800        29.3997          122        84     2012      05        31        152              0.023333      23.180725       3.818032       0.127422   -9999.000000   -9999.000000   -9999.000000   -9999.000000
55591     55591     xizang         91.0800        29.3997          122        84     2012      06        01        153              0.058875      19.118378       0.649007       0.148088   -9999.000000   -9999.000000       0.073700       0.311000
55591     55591     xizang         91.0800        29.3997          122        84     2012      06        02        154              0.055458      18.526642       2.174022       0.184280       0.078000   -9999.000000       0.065900   -9999.000000
55591     55591     xizang         91.0800        29.3997          122        84     2012      06        03        155              0.053708      18.706329       1.164975       0.167782       0.104000   -9999.000000       0.072500       0.230000
55591     55591     xizang         91.0800        29.3997          122        84     2012      06        04        156              0.056042      18.730560       1.048640       0.178108       0.108000   -9999.000000   -9999.000000       0.352000
55591     55591     xizang         91.0800        29.3997          122        84     2012      06        05        157              0.077875      18.338593       0.339582       0.171742   -9999.000000   -9999.000000   -9999.000000   -9999.000000
55591     55591     xizang         91.0800        29.3997          122        84     2012      06        06        158              0.068167      19.179749       3.244241       0.159373   -9999.000000   -9999.000000   -9999.000000       0.685000
55591     55591     xizang         91.0800        29.3997          122        84     2012      06        07        159              0.089625      16.912689       0.644130       0.160794       0.120000   -9999.000000       0.082400   -9999.000000
55591     55591     xizang         91.0800        29.3997          122        84     2012      06        08        160              0.077833      18.585419       0.000000       0.189200       0.097500   -9999.000000       0.080300       0.284000
55591     55591     xizang         91.0800        29.3997          122        84     2012      06        09        161              0.065500      20.782593       0.000000       0.163637       0.102500   -9999.000000   -9999.000000       0.519000
55591     55591     xizang         91.0800        29.3997          122        84     2012      06        10        162              0.055875      22.171631       0.000000       0.147696       0.115000   -9999.000000   -9999.000000   -9999.000000
55591     55591     xizang         91.0800        29.3997          122        84     2012      06        11        163              0.000000      23.254730       0.000000       0.136773   -9999.000000   -9999.000000   -9999.000000       0.109000
55591     55591     xizang         91.0800        29.3997          122        84     2012      06        12        164              0.041375      23.726624       0.000000       0.130841       0.106000   -9999.000000   -9999.000000   -9999.000000
55591     55591     xizang         91.0800        29.3997          122        84     2012      06        13        165              0.035958      24.445618       0.000000       0.127415       0.100500   -9999.000000       0.074700       0.295000
55591     55591     xizang         91.0800        29.3997          122        84     2012      06        14        166              0.031833      23.931396       1.709457       0.125524       0.115000   -9999.000000       0.078600   -9999.000000
55591     55591     xizang         91.0800        29.3997          122        84     2012      06        15        167              0.028708      21.835693       3.095476       0.143299       0.121000   -9999.000000   -9999.000000       0.459000
55591     55591     xizang         91.0800        29.3997          122        84     2012      06        16        168              0.027333      19.506348      17.246376       0.171105   -9999.000000   -9999.000000   -9999.000000       0.408000
55591     55591     xizang         91.0800        29.3997          122        84     2012      06        17        169              0.041458      19.093628       2.917082       0.235573   -9999.000000   -9999.000000   -9999.000000   -9999.000000
55591     55591     xizang         91.0800        29.3997          122        84     2012      06        18        170              0.109917      18.041962      18.511213       0.246480       0.114000   -9999.000000       0.085600       0.712000
55591     55591     xizang         91.0800        29.3997          122        84     2012      06        19        171              0.092917      17.711365       7.922817       0.268091       0.161000   -9999.000000       0.089200   -9999.000000
55591     55591     xizang         91.0800        29.3997          122        84     2012      06        20        172              0.117083      17.684692       2.392999       0.279725       0.161000   -9999.000000       0.101800       0.702000
55591     55591     xizang         91.0800        29.3997          122        84     2012      06        21        173              0.094750      16.539551       4.909354       0.272068   -9999.000000   -9999.000000   -9999.000000       0.620000
55591     55591     xizang         91.0800        29.3997          122        84     2012      06        22        174              0.097958      16.804260      10.377059       0.267459   -9999.000000   -9999.000000   -9999.000000   -9999.000000
55591     55591     xizang         91.0800        29.3997          122        84     2012      06        23        175              0.170875      17.814392      14.437649       0.266211       0.187000   -9999.000000   -9999.000000       0.994000
55591     55591     xizang         91.0800        29.3997          122        84     2012      06        24        176              0.203042      15.881134       7.297019       0.292492       0.271000   -9999.000000       0.118800   -9999.000000
55591     55591     xizang         91.0800        29.3997          122        84     2012      06        25        177              0.170875      14.810638       2.189419       0.298075       0.267000   -9999.000000       0.163400       0.928000
55591     55591     xizang         91.0800        29.3997          122        84     2012      06        26        178              0.166167      16.928192       2.634427       0.278289   -9999.000000   -9999.000000   -9999.000000   -9999.000000
55591     55591     xizang         91.0800        29.3997          122        84     2012      06        27        179              0.139125      16.300415       0.484377       0.275889   -9999.000000   -9999.000000   -9999.000000   -9999.000000
55591     55591     xizang         91.0800        29.3997          122        84     2012      06        28        180              0.120435      18.537292       1.902210       0.257712       0.193000   -9999.000000   -9999.000000       0.842000
55591     55591     xizang         91.0800        29.3997          122        84     2012      06        29        181              0.107583      19.772156       6.344683       0.247223       0.153000   -9999.000000       0.126600   -9999.000000
55591     55591     xizang         91.0800        29.3997          122        84     2012      06        30        182              0.097125      17.456421       1.270447       0.262411       0.191000   -9999.000000       0.126600   -9999.000000
55591     55591     xizang         91.0800        29.3997          122        84     2012      07        01        183              0.087500      18.671204       1.650452       0.257376       0.238000   -9999.000000       0.129300   -9999.000000
55591     55591     xizang         91.0800        29.3997          122        84     2012      07        02        184              0.101750      16.874542      16.160843       0.256640   -9999.000000   -9999.000000   -9999.000000       0.887000
55591     55591     xizang         91.0800        29.3997          122        84     2012      07        03        185              0.161792      15.871918       7.506348       0.265010   -9999.000000   -9999.000000   -9999.000000       1.000000
55591     55591     xizang         91.0800        29.3997          122        84     2012      07        04        186              0.143083      14.144836      12.106919       0.297505       0.272000   -9999.000000   -9999.000000   -9999.000000
55591     55591     xizang         91.0800        29.3997          122        84     2012      07        05        187              0.178792      16.697662      12.859816       0.290723   -9999.000000   -9999.000000       0.130600       1.000000
55591     55591     xizang         91.0800        29.3997          122        84     2012      07        06        188              0.207917      16.107666       6.950886       0.298124   -9999.000000   -9999.000000       0.136300   -9999.000000
55591     55591     xizang         91.0800        29.3997          122        84     2012      07        07        189              0.205292      15.471680       4.837798       0.297033   -9999.000000   -9999.000000       0.121600       1.000000
55591     55591     xizang         91.0800        29.3997          122        84     2012      07        08        190              0.193750      17.289734       0.565516       0.285122   -9999.000000   -9999.000000   -9999.000000       0.973000
55591     55591     xizang         91.0800        29.3997          122        84     2012      07        09        191              0.194792      18.195404      11.672864       0.273468       0.201000   -9999.000000   -9999.000000   -9999.000000
55591     55591     xizang         91.0800        29.3997          122        84     2012      07        10        192              0.208000      18.960693       7.271271       0.279636       0.221000   -9999.000000   -9999.000000       0.882000
55591     55591     xizang         91.0800        29.3997          122        84     2012      07        11        193              0.169292      15.839874       2.950645       0.289641       0.315000   -9999.000000       0.155600   -9999.000000
55591     55591     xizang         91.0800        29.3997          122        84     2012      07        12        194              0.143583      15.275269       0.038862       0.283828   -9999.000000   -9999.000000       0.141800       0.980000
55591     55591     xizang         91.0800        29.3997          122        84     2012      07        13        195              0.151875      18.782013      10.351278       0.265548   -9999.000000   -9999.000000   -9999.000000   -9999.000000
55591     55591     xizang         91.0800        29.3997          122        84     2012      07        14        196              0.159625      17.608887       3.226693       0.272387   -9999.000000   -9999.000000   -9999.000000       0.815000
55591     55591     xizang         91.0800        29.3997          122        84     2012      07        15        197              0.207250      16.714478      15.391232       0.282619   -9999.000000   -9999.000000   -9999.000000       1.000000
55591     55591     xizang         91.0800        29.3997          122        84     2012      07        16        198              0.183875      16.268494      17.192259       0.293999       0.301000   -9999.000000       0.158100   -9999.000000
55591     55591     xizang         91.0800        29.3997          122        84     2012      07        17        199              0.152625      16.768463       0.000000       0.306464       0.290000   -9999.000000       0.159800       1.000000
55591     55591     xizang         91.0800        29.3997          122        84     2012      07        18        200              0.134208      18.613739       5.287304       0.284638   -9999.000000   -9999.000000       0.159100   -9999.000000
55591     55591     xizang         91.0800        29.3997          122        84     2012      07        19        201              0.136917      18.398773      11.075598       0.279916   -9999.000000   -9999.000000   -9999.000000       1.000000
55591     55591     xizang         91.0800        29.3997          122        84     2012      07        20        202              0.153478      16.727539       0.036958       0.287093       0.268500   -9999.000000   -9999.000000       1.000000
55591     55591     xizang         91.0800        29.3997          122        84     2012      07        21        203              0.180409      16.828552       4.512365       0.277755   -9999.000000   -9999.000000   -9999.000000   -9999.000000
55591     55591     xizang         91.0800        29.3997          122        84     2012      07        22        204              0.157167      14.722931       0.356450       0.281591       0.260000   -9999.000000       0.158200       0.912000
55591     55591     xizang         91.0800        29.3997          122        84     2012      07        23        205              0.136708      18.455383      15.040092       0.265295   -9999.000000   -9999.000000       0.196700   -9999.000000
55591     55591     xizang         91.0800        29.3997          122        84     2012      07        24        206              0.118500      18.176605       7.775025       0.278540   -9999.000000   -9999.000000   -9999.000000       0.873000
55591     55591     xizang         91.0800        29.3997          122        84     2012      07        25        207              0.148917      17.827057      19.814434       0.288594       0.263000   -9999.000000   -9999.000000   -9999.000000
55591     55591     xizang         91.0800        29.3997          122        84     2012      07        26        208              0.180500      15.340302       3.646273       0.308272   -9999.000000   -9999.000000   -9999.000000   -9999.000000
55591     55591     xizang         91.0800        29.3997          122        84     2012      07        27        209              0.166417      15.887878      18.207754       0.297694       0.292000   -9999.000000   -9999.000000       1.000000
55591     55591     xizang         91.0800        29.3997          122        84     2012      07        28        210              0.161125      16.157654       3.490179       0.304930       0.324000   -9999.000000       0.202600   -9999.000000
55591     55591     xizang         91.0800        29.3997          122        84     2012      07        29        211              0.140542      17.233063       0.672629       0.294552   -9999.000000   -9999.000000       0.214900       0.821000
55591     55591     xizang         91.0800        29.3997          122        84     2012      07        30        212              0.119667      17.528717       0.183734       0.276821       0.231000   -9999.000000   -9999.000000   -9999.000000
55591     55591     xizang         91.0800        29.3997          122        84     2012      07        31        213              0.112333      18.574005       6.942913       0.264213       0.256000   -9999.000000   -9999.000000       0.993000
55591     55591     xizang         91.0800        29.3997          122        84     2012      08        01        214              0.105333      14.672882       0.429781       0.281798       0.250000   -9999.000000   -9999.000000       0.829000
55591     55591     xizang         91.0800        29.3997          122        84     2012      08        02        215              0.088125      17.669098       0.000000       0.265310       0.259000   -9999.000000       0.181500   -9999.000000
55591     55591     xizang         91.0800        29.3997          122        84     2012      08        03        216              0.075250      18.972473       0.677343       0.251650   -9999.000000   -9999.000000       0.184400       0.618000
55591     55591     xizang         91.0800        29.3997          122        84     2012      08        04        217              0.067958      19.155487       0.183286       0.242994       0.234000   -9999.000000       0.195500   -9999.000000
55591     55591     xizang         91.0800        29.3997          122        84     2012      08        05        218              0.063208      18.562378       0.447276       0.238336       0.219500   -9999.000000   -9999.000000       0.581000
55591     55591     xizang         91.0800        29.3997          122        84     2012      08        06        219              0.059875      19.012878       0.888601       0.232009       0.217000   -9999.000000   -9999.000000       0.734000
55591     55591     xizang         91.0800        29.3997          122        84     2012      08        07        220              0.070500      19.950195      10.777717       0.226605       0.241000   -9999.000000   -9999.000000   -9999.000000
55591     55591     xizang         91.0800        29.3997          122        84     2012      08        08        221              0.108375      16.810455       1.337044       0.257351       0.286000   -9999.000000       0.208000       0.653000
55591     55591     xizang         91.0800        29.3997          122        84     2012      08        09        222              0.091625      16.829712       0.263878       0.266772   -9999.000000   -9999.000000       0.164800   -9999.000000
55591     55591     xizang         91.0800        29.3997          122        84     2012      08        10        223              0.076667      18.703979       1.482258       0.247227   -9999.000000   -9999.000000   -9999.000000       0.741000
55591     55591     xizang         91.0800        29.3997          122        84     2012      08        11        224              0.068708      18.216400      10.863648       0.241412       0.231000   -9999.000000   -9999.000000   -9999.000000
55591     55591     xizang         91.0800        29.3997          122        84     2012      08        12        225              0.064000      17.394714       7.707947       0.268185       0.244000   -9999.000000   -9999.000000       0.671000
55591     55591     xizang         91.0800        29.3997          122        84     2012      08        13        226              0.063833      16.534637       0.433769       0.278767       0.265000   -9999.000000   -9999.000000       0.838000
55591     55591     xizang         91.0800        29.3997          122        84     2012      08        14        227              0.061000      16.980042       2.581287       0.268079   -9999.000000   -9999.000000       0.170400   -9999.000000
55591     55591     xizang         91.0800        29.3997          122        84     2012      08        15        228              0.058833      17.038757       1.603673       0.263232   -9999.000000   -9999.000000       0.171400       0.656000
55591     55591     xizang         91.0800        29.3997          122        84     2012      08        16        229              0.056167      18.075256       1.191038       0.253518       0.209000   -9999.000000   -9999.000000   -9999.000000
55591     55591     xizang         91.0800        29.3997          122        84     2012      08        17        230              0.122375      19.787109       2.699861       0.246284       0.225000   -9999.000000   -9999.000000       0.514000
55591     55591     xizang         91.0800        29.3997          122        84     2012      08        18        231              0.142500      14.917389       3.275115       0.255496       0.273500   -9999.000000   -9999.000000       0.641000
55591     55591     xizang         91.0800        29.3997          122        84     2012      08        19        232              0.124750      16.162506      17.440765       0.256124   -9999.000000   -9999.000000       0.187700   -9999.000000
55591     55591     xizang         91.0800        29.3997          122        84     2012      08        20        233              0.161625      14.790924       5.606456       0.276832   -9999.000000   -9999.000000       0.154700       1.000000
55591     55591     xizang         91.0800        29.3997          122        84     2012      08        21        234              0.162000      12.947296       8.037564       0.295607       0.314000   -9999.000000       0.159700   -9999.000000
55591     55591     xizang         91.0800        29.3997          122        84     2012      08        22        235              0.160583      13.943756       4.173617       0.287060       0.304000   -9999.000000   -9999.000000   -9999.000000
55591     55591     xizang         91.0800        29.3997          122        84     2012      08        23        236              0.150583      13.860352       1.099059       0.282176       0.320000   -9999.000000   -9999.000000   -9999.000000
55591     55591     xizang         91.0800        29.3997          122        84     2012      08        24        237              0.129250      14.852081       0.000000       0.270507       0.335000   -9999.000000   -9999.000000   -9999.000000
55591     55591     xizang         91.0800        29.3997          122        84     2012      08        25        238              0.000000      15.414093       0.000000       0.260092   -9999.000000   -9999.000000       0.140100       0.733000
55591     55591     xizang         91.0800        29.3997          122        84     2012      08        26        239              0.092542      16.204865       0.000000       0.251644   -9999.000000   -9999.000000       0.142100   -9999.000000
55591     55591     xizang         91.0800        29.3997          122        84     2012      08        27        240              0.080542      16.528534       0.000000       0.245435       0.257000   -9999.000000   -9999.000000       0.744000
55591     55591     xizang         91.0800        29.3997          122        84     2012      08        28        241              0.072000      17.132324       0.830854       0.240336       0.300500   -9999.000000   -9999.000000   -9999.000000
55591     55591     xizang         91.0800        29.3997          122        84     2012      08        29        242              0.070292      15.405334      10.512804       0.239826       0.324000   -9999.000000   -9999.000000       1.000000
55591     55591     xizang         91.0800        29.3997          122        84     2012      08        30        243              0.074917      13.961090       7.663894       0.265070   -9999.000000   -9999.000000       0.163700       0.937000
55591     55591     xizang         91.0800        29.3997          122        84     2012      08        31        244              0.080458      14.918396       9.115482       0.278007   -9999.000000   -9999.000000       0.156100   -9999.000000
55591     55591     xizang         91.0800        29.3997          122        84     2012      09        01        245              0.082625      15.571442       0.000000       0.285917       0.259000   -9999.000000       0.181600       0.799000
55591     55591     xizang         91.0800        29.3997          122        84     2012      09        02        246              0.074917      14.162018       0.000000       0.272768       0.239000   -9999.000000   -9999.000000   -9999.000000
55591     55591     xizang         91.0800        29.3997          122        84     2012      09        03        247              0.067500      14.332825       0.000000       0.258557       0.240000   -9999.000000   -9999.000000       0.682000
55591     55591     xizang         91.0800        29.3997          122        84     2012      09        04        248              0.062083      15.233521       0.000000       0.247644       0.246000   -9999.000000   -9999.000000       0.737000
55591     55591     xizang         91.0800        29.3997          122        84     2012      09        05        249              0.058083      15.076355       0.000000       0.239972   -9999.000000   -9999.000000       0.140100   -9999.000000
55591     55591     xizang         91.0800        29.3997          122        84     2012      09        06        250              0.055042      15.567719       0.000000       0.233172   -9999.000000   -9999.000000       0.148900       0.432000
55591     55591     xizang         91.0800        29.3997          122        84     2012      09        07        251              0.053208      16.424286       0.000000       0.226919       0.218000   -9999.000000       0.146800   -9999.000000
55591     55591     xizang         91.0800        29.3997          122        84     2012      09        08        252              0.051250      16.975555       2.358926       0.222079       0.157000   -9999.000000   -9999.000000       0.680000
55591     55591     xizang         91.0800        29.3997          122        84     2012      09        09        253              0.050167      16.852997       2.885126       0.225261       0.225000   -9999.000000   -9999.000000   -9999.000000
55591     55591     xizang         91.0800        29.3997          122        84     2012      09        10        254              0.052667      16.368073       4.581583       0.230956   -9999.000000   -9999.000000   -9999.000000       0.672000
55591     55591     xizang         91.0800        29.3997          122        84     2012      09        11        255              0.057750      15.331818       1.980109       0.245580   -9999.000000   -9999.000000       0.145400       0.820000
55591     55591     xizang         91.0800        29.3997          122        84     2012      09        12        256              0.057292      14.171631       0.400481       0.248792       0.197000   -9999.000000       0.143300   -9999.000000
55591     55591     xizang         91.0800        29.3997          122        84     2012      09        13        257              0.055875      15.976410       5.242613       0.237633   -9999.000000   -9999.000000   -9999.000000       0.805000
55591     55591     xizang         91.0800        29.3997          122        84     2012      09        14        258              0.058833      15.783203       3.436959       0.240244       0.279000   -9999.000000   -9999.000000   -9999.000000
55591     55591     xizang         91.0800        29.3997          122        84     2012      09        15        259              0.066250      14.771515       3.828741       0.255930   -9999.000000   -9999.000000   -9999.000000       0.885000
55591     55591     xizang         91.0800        29.3997          122        84     2012      09        16        260              0.083250      14.559875       1.653390       0.264454   -9999.000000   -9999.000000       0.146800       0.697000
55591     55591     xizang         91.0800        29.3997          122        84     2012      09        17        261              0.124167      14.168640       8.136963       0.257682   -9999.000000   -9999.000000       0.142000   -9999.000000
55591     55591     xizang         91.0800        29.3997          122        84     2012      09        18        262              0.111208      13.335266       0.119450       0.270171   -9999.000000   -9999.000000       0.154600       0.880000
55591     55591     xizang         91.0800        29.3997          122        84     2012      09        19        263              0.099417      14.161652       0.474948       0.268537       0.284000   -9999.000000   -9999.000000   -9999.000000
55591     55591     xizang         91.0800        29.3997          122        84     2012      09        20        264              0.090125      15.107758       0.598062       0.254013       0.282000   -9999.000000   -9999.000000       0.726000
55591     55591     xizang         91.0800        29.3997          122        84     2012      09        21        265              0.082333      15.851959       1.019573       0.246087   -9999.000000   -9999.000000   -9999.000000   -9999.000000
55591     55591     xizang         91.0800        29.3997          122        84     2012      09        22        266              0.075917      15.720306       0.000000       0.241585   -9999.000000   -9999.000000       0.128800   -9999.000000
55591     55591     xizang         91.0800        29.3997          122        84     2012      09        23        267              0.070292      15.411316       0.000000       0.234441       0.207000   -9999.000000       0.126900       0.718000
55591     55591     xizang         91.0800        29.3997          122        84     2012      09        24        268              0.065833      15.601288       0.000000       0.228488       0.201000   -9999.000000       0.122400   -9999.000000
55591     55591     xizang         91.0800        29.3997          122        84     2012      09        25        269              0.062417      15.084259       0.000000       0.223971       0.209000   -9999.000000   -9999.000000       0.543000
55591     55591     xizang         91.0800        29.3997          122        84     2012      09        26        270              0.059667      14.549774       0.000000       0.219674   -9999.000000   -9999.000000   -9999.000000   -9999.000000
55591     55591     xizang         91.0800        29.3997          122        84     2012      09        27        271              0.058286      14.828094       0.000000       0.215190   -9999.000000   -9999.000000   -9999.000000       0.578000
55591     55591     xizang         91.0800        29.3997          122        84     2012      09        28        272              0.054000      14.738373       0.000000       0.211534       0.169000   -9999.000000       0.111700       0.492000
55591     55591     xizang         91.0800        29.3997          122        84     2012      09        29        273              0.052583      14.869537       0.184787       0.208768       0.182000   -9999.000000       0.122600   -9999.000000
55591     55591     xizang         91.0800        29.3997          122        84     2012      09        30        274              0.051250      13.925629       1.041311       0.207877   -9999.000000   -9999.000000   -9999.000000       0.449000
55591     55591     xizang         91.0800        29.3997          122        84     2012      10        01        275              0.049917      14.928864       0.000000       0.208510       0.200000   -9999.000000   -9999.000000   -9999.000000
55591     55591     xizang         91.0800        29.3997          122        84     2012      10        02        276              0.048708      16.054596       0.252192       0.203035   -9999.000000   -9999.000000   -9999.000000       0.588000
55591     55591     xizang         91.0800        29.3997          122        84     2012      10        03        277              0.047875      16.359741       0.950412       0.199224   -9999.000000   -9999.000000       0.098300       0.508000
55591     55591     xizang         91.0800        29.3997          122        84     2012      10        04        278              0.047542      15.198608       0.258036       0.197965       0.155000   -9999.000000       0.095700   -9999.000000
55591     55591     xizang         91.0800        29.3997          122        84     2012      10        05        279              0.047000      14.969025       0.310387       0.195863       0.156000   -9999.000000   -9999.000000       0.197000
55591     55591     xizang         91.0800        29.3997          122        84     2012      10        06        280              0.046542      15.302673       1.603572       0.194697       0.167000   -9999.000000   -9999.000000   -9999.000000
55591     55591     xizang         91.0800        29.3997          122        84     2012      10        07        281              0.046042      14.709351       0.000000       0.192135   -9999.000000   -9999.000000   -9999.000000       0.405000
55591     55591     xizang         91.0800        29.3997          122        84     2012      10        08        282              0.045833      13.808075       0.000000       0.187991   -9999.000000   -9999.000000   -9999.000000   -9999.000000
55591     55591     xizang         91.0800        29.3997          122        84     2012      10        09        283              0.045667      14.105469       3.548792       0.185013       0.152000   -9999.000000       0.100100       0.235000
55591     55591     xizang         91.0800        29.3997          122        84     2012      10        10        284              0.045958      13.185974       1.863354       0.198897       0.187000   -9999.000000       0.128000       0.676000
55591     55591     xizang         91.0800        29.3997          122        84     2012      10        11        285              0.046000       9.761414       3.305671       0.228331       0.135000   -9999.000000   -9999.000000   -9999.000000
55591     55591     xizang         91.0800        29.3997          122        84     2012      10        12        286              0.045833      11.339844       2.069492       0.230349   -9999.000000   -9999.000000   -9999.000000       0.485000
55591     55591     xizang         91.0800        29.3997          122        84     2012      10        13        287              0.045458      11.673615       1.693860       0.236052   -9999.000000   -9999.000000   -9999.000000   -9999.000000
55591     55591     xizang         91.0800        29.3997          122        84     2012      10        14        288              0.045125      11.060333       1.261921       0.230300   -9999.000000   -9999.000000   -9999.000000       0.211000
55591     55591     xizang         91.0800        29.3997          122        84     2012      10        15        289              0.045083      10.506226       1.071087       0.225746       0.119000   -9999.000000       0.083500       0.209000
55591     55591     xizang         91.0800        29.3997          122        84     2012      10        16        290              0.044917       9.643799       2.859031       0.221133       0.139000   -9999.000000       0.092800   -9999.000000
55591     55591     xizang         91.0800        29.3997          122        84     2012      10        17        291              0.044792       9.526093       1.178583       0.221141       0.157000   -9999.000000   -9999.000000       0.329000
55591     55591     xizang         91.0800        29.3997          122        84     2012      10        18        292              0.044667       9.880463       0.922973       0.218617   -9999.000000   -9999.000000   -9999.000000   -9999.000000
55591     55591     xizang         91.0800        29.3997          122        84     2012      10        19        293              0.044583       9.447357       1.029983       0.214011   -9999.000000   -9999.000000   -9999.000000       0.136000
55591     55591     xizang         91.0800        29.3997          122        84     2012      10        20        294              0.044500       8.853973       0.717070       0.207525       0.133000   -9999.000000       0.084600   -9999.000000
55591     55591     xizang         91.0800        29.3997          122        84     2012      10        21        295              0.044500       8.729706       0.324543       0.204858       0.125000   -9999.000000       0.082200   -9999.000000
55591     55591     xizang         91.0800        29.3997          122        84     2012      10        22        296              0.044667       9.422150       0.345711       0.204708   -9999.000000   -9999.000000       0.086500       0.289000
55591     55591     xizang         91.0800        29.3997          122        84     2012      10        23        297              0.044250      10.325043       0.287120       0.204714   -9999.000000   -9999.000000   -9999.000000   -9999.000000
55591     55591     xizang         91.0800        29.3997          122        84     2012      10        24        298              0.044208       9.243500       0.263971       0.199351   -9999.000000   -9999.000000   -9999.000000       0.204000
55591     55591     xizang         91.0800        29.3997          122        84     2012      10        25        299              0.000000       8.892731       0.451901       0.199597       0.118000   -9999.000000   -9999.000000   -9999.000000
55591     55591     xizang         91.0800        29.3997          122        84     2012      10        26        300              0.044292       8.149384       0.258182       0.197883       0.125000   -9999.000000       0.085200       0.146000
55591     55591     xizang         91.0800        29.3997          122        84     2012      10        27        301              0.044125       7.944214       3.926245       0.195187       0.135000   -9999.000000       0.088900       0.124000
55591     55591     xizang         91.0800        29.3997          122        84     2012      10        28        302              0.000000       7.891022       1.609516       0.191791       0.140000   -9999.000000   -9999.000000   -9999.000000
55591     55591     xizang         91.0800        29.3997          122        84     2012      10        29        303              0.043958       6.598846       1.555857       0.186346   -9999.000000   -9999.000000   -9999.000000       0.089000
55591     55591     xizang         91.0800        29.3997          122        84     2012      10        30        304              0.043917       5.274078       0.000000       0.180876   -9999.000000   -9999.000000   -9999.000000   -9999.000000
55591     55591     xizang         91.0800        29.3997          122        84     2012      10        31        305              0.044000       5.937408       1.867533       0.182598       0.115000   -9999.000000       0.077600       0.071000
55591     55591     xizang         91.0800        29.3997          122        84     2012      11        01        306              0.043875       6.129761       0.057372       0.182616       0.116000   -9999.000000       0.076000       0.324000
55591     55591     xizang         91.0800        29.3997          122        84     2012      11        02        307              0.043833       5.898468       2.689784       0.180732       0.130000   -9999.000000       0.077500   -9999.000000
55591     55591     xizang         91.0800        29.3997          122        84     2012      11        03        308              0.043792       6.537567       3.918484       0.182849   -9999.000000   -9999.000000   -9999.000000       0.018000
55591     55591     xizang         91.0800        29.3997          122        84     2012      11        04        309              0.043833       5.870087      11.511599       0.177291   -9999.000000   -9999.000000   -9999.000000   -9999.000000
55591     55591     xizang         91.0800        29.3997          122        84     2012      11        05        310              0.043833       6.073486       0.000000       0.176268       0.111000   -9999.000000   -9999.000000       0.189000
55591     55591     xizang         91.0800        29.3997          122        84     2012      11        06        311              0.043792       6.473328       0.000000       0.178143       0.114000   -9999.000000       0.073500   -9999.000000
55591     55591     xizang         91.0800        29.3997          122        84     2012      11        07        312              0.043708       7.013641       0.000000       0.182635       0.122000   -9999.000000       0.069500       0.150000
55591     55591     xizang         91.0800        29.3997          122        84     2012      11        08        313              0.043625       6.491486       0.000000       0.179059   -9999.000000   -9999.000000       0.075300       0.176000
55591     55591     xizang         91.0800        29.3997          122        84     2012      11        09        314              0.043583       5.289124       0.000000       0.171249   -9999.000000   -9999.000000   -9999.000000   -9999.000000
55591     55591     xizang         91.0800        29.3997          122        84     2012      11        10        315              0.043542       4.073639       0.000000       0.168031   -9999.000000   -9999.000000   -9999.000000       0.153000
55591     55591     xizang         91.0800        29.3997          122        84     2012      11        11        316              0.043625       3.979095       0.000000       0.164972       0.120000   -9999.000000   -9999.000000   -9999.000000
55591     55591     xizang         91.0800        29.3997          122        84     2012      11        12        317              0.043583       4.122864       0.000000       0.166069       0.124000   -9999.000000       0.067500       0.079000
55591     55591     xizang         91.0800        29.3997          122        84     2012      11        13        318              0.000000       4.241394       0.000000       0.166800       0.134000   -9999.000000       0.068300       0.043000
55591     55591     xizang         91.0800        29.3997          122        84     2012      11        14        319              0.043458       3.381744       0.000000       0.160709   -9999.000000   -9999.000000   -9999.000000   -9999.000000
55591     55591     xizang         91.0800        29.3997          122        84     2012      11        15        320              0.043500       2.984039       0.000000       0.159089   -9999.000000   -9999.000000   -9999.000000       0.170000
55591     55591     xizang         91.0800        29.3997          122        84     2012      11        16        321              0.043333       2.616882       0.000000       0.158278       0.118000   -9999.000000   -9999.000000   -9999.000000
55591     55591     xizang         91.0800        29.3997          122        84     2012      11        17        322              0.000000       1.434143       3.730029       0.148331       0.124000   -9999.000000       0.069000       0.181000
55591     55591     xizang         91.0800        29.3997          122        84     2012      11        18        323              0.043500       1.491974       0.000000       0.149235       0.132000   -9999.000000       0.064800   -9999.000000
55591     55591     xizang         91.0800        29.3997          122        84     2012      11        19        324              0.043583       3.449738       0.000000       0.165182   -9999.000000   -9999.000000       0.072400   -9999.000000
55591     55591     xizang         91.0800        29.3997          122        84     2012      11        20        325              0.043583       5.241638       0.000000       0.175728   -9999.000000   -9999.000000   -9999.000000       0.198000
55591     55591     xizang         91.0800        29.3997          122        84     2012      11        21        326              0.043583       4.839081       0.000000       0.168641       0.111000   -9999.000000   -9999.000000   -9999.000000
55591     55591     xizang         91.0800        29.3997          122        84     2012      11        22        327              0.043583       4.149384       0.000000       0.165092       0.112000   -9999.000000   -9999.000000       0.317000
55591     55591     xizang         91.0800        29.3997          122        84     2012      11        23        328              0.043542       4.570526       0.000000       0.166605       0.130000   -9999.000000       0.070200   -9999.000000
55591     55591     xizang         91.0800        29.3997          122        84     2012      11        24        329              0.043500       5.131104       0.000000       0.173988   -9999.000000   -9999.000000       0.074800       0.144000
55591     55591     xizang         91.0800        29.3997          122        84     2012      11        25        330              0.043542       3.857208       0.000000       0.173825   -9999.000000   -9999.000000   -9999.000000       0.327000
55591     55591     xizang         91.0800        29.3997          122        84     2012      11        26        331              0.043375       2.947815       0.000000       0.161070   -9999.000000   -9999.000000   -9999.000000   -9999.000000
55591     55591     xizang         91.0800        29.3997          122        84     2012      11        27        332              0.043542       1.829224       0.000000       0.152711       0.119000   -9999.000000   -9999.000000       0.057000
55591     55591     xizang         91.0800        29.3997          122        84     2012      11        28        333              0.043458       2.470612       0.000000       0.155544       0.129000   -9999.000000   -9999.000000   -9999.000000
55591     55591     xizang         91.0800        29.3997          122        84     2012      11        29        334              0.043500       2.615814       0.000000       0.155292       0.136000   -9999.000000       0.063800       0.048000
55591     55591     xizang         91.0800        29.3997          122        84     2012      11        30        335              0.043458       3.082153       0.000000       0.160923   -9999.000000   -9999.000000       0.071500       0.213000
55591     55591     xizang         91.0800        29.3997          122        84     2012      12        01        336              0.043458       3.956116       0.000000       0.165179   -9999.000000   -9999.000000   -9999.000000   -9999.000000
55591     55591     xizang         91.0800        29.3997          122        84     2012      12        02        337              0.043375       2.499634       3.896003       0.155435       0.116000   -9999.000000   -9999.000000       0.002000
55591     55591     xizang         91.0800        29.3997          122        84     2012      12        03        338              0.043375       1.903595       0.000000       0.150845       0.122000   -9999.000000   -9999.000000   -9999.000000
55591     55591     xizang         91.0800        29.3997          122        84     2012      12        04        339              0.043458       1.621582       0.000000       0.148795       0.128000   -9999.000000       0.061600       0.094000
55591     55591     xizang         91.0800        29.3997          122        84     2012      12        05        340              0.043375       1.795746       0.000000       0.148641   -9999.000000   -9999.000000       0.061200   -9999.000000
55591     55591     xizang         91.0800        29.3997          122        84     2012      12        06        341              0.043500       1.301727       0.000000       0.145354   -9999.000000   -9999.000000       0.069700       0.095000
55591     55591     xizang         91.0800        29.3997          122        84     2012      12        07        342              0.043500       1.515869       0.192286       0.146838   -9999.000000   -9999.000000   -9999.000000       0.144000
55591     55591     xizang         91.0800        29.3997          122        84     2012      12        08        343              0.043667       1.329285       0.000000       0.147018       0.124000   -9999.000000   -9999.000000   -9999.000000
55591     55591     xizang         91.0800        29.3997          122        84     2012      12        09        344              0.043542       1.207916       2.004539       0.150271       0.125000   -9999.000000   -9999.000000       0.054000
55591     55591     xizang         91.0800        29.3997          122        84     2012      12        10        345              0.043458       1.624695       0.000000       0.148595       0.137000   -9999.000000       0.063600   -9999.000000
55591     55591     xizang         91.0800        29.3997          122        84     2012      12        11        346              0.043375       0.387878       1.214916       0.140316   -9999.000000   -9999.000000       0.068600       0.034000
55591     55591     xizang         91.0800        29.3997          122        84     2012      12        12        347              0.043375       0.781494       0.000000       0.145608   -9999.000000   -9999.000000   -9999.000000       0.046000
55591     55591     xizang         91.0800        29.3997          122        84     2012      12        13        348              0.043292       0.358734       0.000000       0.143163   -9999.000000   -9999.000000   -9999.000000   -9999.000000
55591     55591     xizang         91.0800        29.3997          122        84     2012      12        14        349              0.043333       0.578369       0.000000       0.144677       0.128000   -9999.000000   -9999.000000       0.075000
55591     55591     xizang         91.0800        29.3997          122        84     2012      12        15        350              0.000000       0.406769       0.000000       0.143193       0.133000   -9999.000000       0.067100   -9999.000000
55591     55591     xizang         91.0800        29.3997          122        84     2012      12        16        351              0.043375      -0.033081       0.000000       0.138469   -9999.000000   -9999.000000       0.064500       0.043000
55591     55591     xizang         91.0800        29.3997          122        84     2012      12        17        352              0.043500       1.461548       9.047730       0.150549   -9999.000000   -9999.000000       0.066800   -9999.000000
55591     55591     xizang         91.0800        29.3997          122        84     2012      12        18        353              0.043333       2.331451       4.057273       0.152519       0.115000   -9999.000000   -9999.000000   -9999.000000
55591     55591     xizang         91.0800        29.3997          122        84     2012      12        19        354              0.043375       1.092194       0.000000       0.144569       0.115000   -9999.000000   -9999.000000       0.024000
55591     55591     xizang         91.0800        29.3997          122        84     2012      12        20        355              0.000000       2.995117       0.000000       0.159898       0.127000   -9999.000000   -9999.000000   -9999.000000
55591     55591     xizang         91.0800        29.3997          122        84     2012      12        21        356              0.043261       4.560455       0.000000       0.171261       0.133000   -9999.000000       0.063800       0.077000
55591     55591     xizang         91.0800        29.3997          122        84     2012      12        22        357              0.042917       2.327698       0.000000       0.153642   -9999.000000   -9999.000000       0.063000   -9999.000000
55591     55591     xizang         91.0800        29.3997          122        84     2012      12        23        358              0.042750      -0.466522       0.147126       0.135507   -9999.000000   -9999.000000       0.070800       0.026000
55591     55591     xizang         91.0800        29.3997          122        84     2012      12        24        359              0.042600      -2.048920       0.477054       0.125943       0.115000   -9999.000000   -9999.000000       0.013000
55591     55591     xizang         91.0800        29.3997          122        84     2012      12        25        360              0.043042      -2.467743       0.221057       0.122833   -9999.000000   -9999.000000   -9999.000000   -9999.000000
55591     55591     xizang         91.0800        29.3997          122        84     2012      12        26        361              0.000000      -1.820129       0.512927       0.125449       0.145000   -9999.000000   -9999.000000       0.027000
55591     55591     xizang         91.0800        29.3997          122        84     2012      12        27        362              0.043000      -2.398315       0.000000       0.124273   -9999.000000   -9999.000000       0.061200   -9999.000000
55591     55591     xizang         91.0800        29.3997          122        84     2012      12        28        363              0.000000      -1.669983       0.000000       0.127221   -9999.000000   -9999.000000       0.067100       0.038000
55591     55591     xizang         91.0800        29.3997          122        84     2012      12        29        364              0.000000       0.760712       0.000000       0.144357       0.110000   -9999.000000   -9999.000000       0.251000
55591     55591     xizang         91.0800        29.3997          122        84     2012      12        30        365              0.000000       2.218506       0.000000       0.153324       0.114000   -9999.000000   -9999.000000   -9999.000000
55591     55591     xizang         91.0800        29.3997          122        84     2012      12        31        366              0.043267       4.070801       0.000000       0.167859   -9999.000000   -9999.000000   -9999.000000   -9999.000000
