# Supplementary material for: Research on Fusing Multisatellite Soil Moisture Data Based on Bayesian Model Averaging
Source: Hindawi journal article supplement (doi:10.1155/2018/9310838), 2018-06-25
Supplement: f1 [file 9310838.f1.zip › 2012_sm00-10cm_daily_ZDB_ZHY_56038_366days_allin.txt]

56038     56038     sichuan        98.1000        32.9833          108       112     2012      01        01        001              0.000000   -9999.000000       0.452975   -9999.000000   -9999.000000   -9999.000000   -9999.000000   -9999.000000
56038     56038     sichuan        98.1000        32.9833          108       112     2012      01        02        002              0.014167      -4.679108       1.175182       0.107660   -9999.000000   -9999.000000       0.018400       0.020000
56038     56038     sichuan        98.1000        32.9833          108       112     2012      01        03        003              0.000000      -2.819489       0.426447       0.129772   -9999.000000   -9999.000000       0.025800   -9999.000000
56038     56038     sichuan        98.1000        32.9833          108       112     2012      01        04        004              0.013375      -7.863647       0.000000       0.089986   -9999.000000   -9999.000000       0.015100       0.264000
56038     56038     sichuan        98.1000        32.9833          108       112     2012      01        05        005              0.012375     -10.027893       0.000000       0.086386   -9999.000000   -9999.000000   -9999.000000       0.010000
56038     56038     sichuan        98.1000        32.9833          108       112     2012      01        06        006              0.012250     -11.083191       0.000000       0.084067   -9999.000000   -9999.000000   -9999.000000   -9999.000000
56038     56038     sichuan        98.1000        32.9833          108       112     2012      01        07        007              0.011833      -9.694702       0.000000       0.084512   -9999.000000   -9999.000000       0.015100       0.057000
56038     56038     sichuan        98.1000        32.9833          108       112     2012      01        08        008              0.000000      -8.737885       0.000000       0.085008   -9999.000000   -9999.000000       0.019600   -9999.000000
56038     56038     sichuan        98.1000        32.9833          108       112     2012      01        09        009              0.012458      -7.723572       0.000000       0.085852   -9999.000000   -9999.000000       0.023600       0.243000
56038     56038     sichuan        98.1000        32.9833          108       112     2012      01        10        010              0.012125      -8.000641       0.000000       0.085959   -9999.000000   -9999.000000   -9999.000000   -9999.000000
56038     56038     sichuan        98.1000        32.9833          108       112     2012      01        11        011              0.011542      -7.635468       0.000000       0.085864   -9999.000000   -9999.000000   -9999.000000   -9999.000000
56038     56038     sichuan        98.1000        32.9833          108       112     2012      01        12        012              0.011417      -8.081390       0.000000       0.085707   -9999.000000   -9999.000000   -9999.000000       0.077000
56038     56038     sichuan        98.1000        32.9833          108       112     2012      01        13        013              0.011542      -9.169067       0.000000       0.085128   -9999.000000   -9999.000000       0.025600   -9999.000000
56038     56038     sichuan        98.1000        32.9833          108       112     2012      01        14        014              0.011417      -9.964447       0.000000       0.085131   -9999.000000   -9999.000000       0.017300       0.045000
56038     56038     sichuan        98.1000        32.9833          108       112     2012      01        15        015              0.011000     -11.515564       0.000000       0.084362   -9999.000000   -9999.000000       0.016100   -9999.000000
56038     56038     sichuan        98.1000        32.9833          108       112     2012      01        16        016              0.011542     -10.022247       0.000000       0.083887   -9999.000000   -9999.000000   -9999.000000   -9999.000000
56038     56038     sichuan        98.1000        32.9833          108       112     2012      01        17        017              0.000000      -7.530579       0.000000       0.087927   -9999.000000   -9999.000000   -9999.000000       0.064000
56038     56038     sichuan        98.1000        32.9833          108       112     2012      01        18        018              0.011292      -7.968719       0.000000       0.086626   -9999.000000   -9999.000000   -9999.000000   -9999.000000
56038     56038     sichuan        98.1000        32.9833          108       112     2012      01        19        019              0.011500      -7.569275       0.000000       0.085139   -9999.000000   -9999.000000       0.014500       0.003000
56038     56038     sichuan        98.1000        32.9833          108       112     2012      01        20        020              0.011625      -6.446350       0.000000       0.086769   -9999.000000   -9999.000000       0.021700   -9999.000000
56038     56038     sichuan        98.1000        32.9833          108       112     2012      01        21        021              0.011333      -6.471680       0.000000       0.086380   -9999.000000   -9999.000000       0.011800       0.062000
56038     56038     sichuan        98.1000        32.9833          108       112     2012      01        22        022              0.010667      -8.801575       0.000000       0.084720   -9999.000000   -9999.000000   -9999.000000       0.015000
56038     56038     sichuan        98.1000        32.9833          108       112     2012      01        23        023              0.010792      -9.818756       0.000000       0.083277   -9999.000000   -9999.000000   -9999.000000   -9999.000000
56038     56038     sichuan        98.1000        32.9833          108       112     2012      01        24        024              0.011333      -7.043854       0.000000       0.087723   -9999.000000   -9999.000000       0.011500       0.106000
56038     56038     sichuan        98.1000        32.9833          108       112     2012      01        25        025              0.011083      -8.783630       0.000000       0.084712   -9999.000000   -9999.000000       0.014100   -9999.000000
56038     56038     sichuan        98.1000        32.9833          108       112     2012      01        26        026              0.011292      -8.463776       0.000000       0.088092   -9999.000000   -9999.000000       0.022800       0.209000
56038     56038     sichuan        98.1000        32.9833          108       112     2012      01        27        027              0.011292      -7.069244       0.000000       0.096690   -9999.000000   -9999.000000       0.010000       0.088000
56038     56038     sichuan        98.1000        32.9833          108       112     2012      01        28        028              0.011167      -6.890259       0.000000       0.094898   -9999.000000   -9999.000000   -9999.000000   -9999.000000
56038     56038     sichuan        98.1000        32.9833          108       112     2012      01        29        029              0.011125      -6.957794       0.000000       0.096687   -9999.000000   -9999.000000   -9999.000000       0.019000
56038     56038     sichuan        98.1000        32.9833          108       112     2012      01        30        030              0.010833      -6.663879       0.000000       0.098647   -9999.000000   -9999.000000       0.022000   -9999.000000
56038     56038     sichuan        98.1000        32.9833          108       112     2012      01        31        031              0.010750      -7.792786       0.000000       0.096823   -9999.000000   -9999.000000       0.013500       0.123000
56038     56038     sichuan        98.1000        32.9833          108       112     2012      02        01        032              0.011625      -6.492065       0.000000       0.103592   -9999.000000   -9999.000000   -9999.000000   -9999.000000
56038     56038     sichuan        98.1000        32.9833          108       112     2012      02        02        033              0.010875      -4.125916      14.242119       0.114456   -9999.000000   -9999.000000   -9999.000000       0.108000
56038     56038     sichuan        98.1000        32.9833          108       112     2012      02        03        034              0.010250      -7.003021       0.208296       0.097798   -9999.000000   -9999.000000   -9999.000000       0.071000
56038     56038     sichuan        98.1000        32.9833          108       112     2012      02        04        035              0.011250      -5.675751       0.310821       0.102365   -9999.000000   -9999.000000   -9999.000000   -9999.000000
56038     56038     sichuan        98.1000        32.9833          108       112     2012      02        05        036              0.012167      -2.119141       0.000000       0.133635   -9999.000000   -9999.000000       0.017000       0.070000
56038     56038     sichuan        98.1000        32.9833          108       112     2012      02        06        037              0.011667      -2.127441       0.000000       0.133669   -9999.000000   -9999.000000       0.028800   -9999.000000
56038     56038     sichuan        98.1000        32.9833          108       112     2012      02        07        038              0.011750      -3.633636       0.200599       0.126990   -9999.000000   -9999.000000       0.020300       0.048000
56038     56038     sichuan        98.1000        32.9833          108       112     2012      02        08        039              0.015083      -1.114655       0.000000       0.139555   -9999.000000   -9999.000000   -9999.000000   -9999.000000
56038     56038     sichuan        98.1000        32.9833          108       112     2012      02        09        040              0.015708       1.440277       0.000000       0.170518   -9999.000000   -9999.000000   -9999.000000   -9999.000000
56038     56038     sichuan        98.1000        32.9833          108       112     2012      02        10        041              0.015208      -1.471710       0.000000       0.142829   -9999.000000   -9999.000000       0.023500       0.016000
56038     56038     sichuan        98.1000        32.9833          108       112     2012      02        11        042              0.014208      -5.993866       0.296710       0.095598   -9999.000000   -9999.000000       0.026100   -9999.000000
56038     56038     sichuan        98.1000        32.9833          108       112     2012      02        12        043              0.014000      -5.912994       0.000000       0.093006   -9999.000000   -9999.000000       0.039700       0.049000
56038     56038     sichuan        98.1000        32.9833          108       112     2012      02        13        044              0.013875      -5.755737       0.000000       0.093128   -9999.000000   -9999.000000       0.020900   -9999.000000
56038     56038     sichuan        98.1000        32.9833          108       112     2012      02        14        045              0.013458      -5.723083       0.000000       0.095088   -9999.000000   -9999.000000   -9999.000000   -9999.000000
56038     56038     sichuan        98.1000        32.9833          108       112     2012      02        15        046              0.014875      -4.440399       0.000000       0.105204   -9999.000000   -9999.000000   -9999.000000       0.178000
56038     56038     sichuan        98.1000        32.9833          108       112     2012      02        16        047              0.015875      -2.621918       0.000000       0.124072   -9999.000000   -9999.000000       0.029600   -9999.000000
56038     56038     sichuan        98.1000        32.9833          108       112     2012      02        17        048              0.015000      -1.567993       0.000000       0.136636   -9999.000000   -9999.000000       0.018700       0.036000
56038     56038     sichuan        98.1000        32.9833          108       112     2012      02        18        049              0.015000      -3.233032       0.000000       0.120826   -9999.000000   -9999.000000   -9999.000000   -9999.000000
56038     56038     sichuan        98.1000        32.9833          108       112     2012      02        19        050              0.014333      -5.823181       0.000000       0.098047   -9999.000000   -9999.000000   -9999.000000   -9999.000000
56038     56038     sichuan        98.1000        32.9833          108       112     2012      02        20        051              0.018167      -4.107880       0.000000       0.108560   -9999.000000   -9999.000000   -9999.000000       0.202000
56038     56038     sichuan        98.1000        32.9833          108       112     2012      02        21        052              0.018792      -2.250549       0.000000       0.131758   -9999.000000   -9999.000000   -9999.000000   -9999.000000
56038     56038     sichuan        98.1000        32.9833          108       112     2012      02        22        053              0.022957      -1.661041       0.000000       0.132411   -9999.000000   -9999.000000       0.029600       0.099000
56038     56038     sichuan        98.1000        32.9833          108       112     2012      02        23        054              0.036391      -0.570404       0.000000       0.145099   -9999.000000   -9999.000000       0.043600   -9999.000000
56038     56038     sichuan        98.1000        32.9833          108       112     2012      02        24        055              0.028042      -0.279083       0.000000       0.153090   -9999.000000   -9999.000000       0.033400       0.478000
56038     56038     sichuan        98.1000        32.9833          108       112     2012      02        25        056              0.026417       1.109833       0.000000       0.163798   -9999.000000   -9999.000000   -9999.000000       0.175000
56038     56038     sichuan        98.1000        32.9833          108       112     2012      02        26        057              0.025750       0.951630       0.000000       0.162737   -9999.000000   -9999.000000   -9999.000000   -9999.000000
56038     56038     sichuan        98.1000        32.9833          108       112     2012      02        27        058              0.024696      -0.184235       0.000000       0.154297   -9999.000000   -9999.000000       0.028100       0.140000
56038     56038     sichuan        98.1000        32.9833          108       112     2012      02        28        059              0.025348       0.555756       0.000000       0.155659   -9999.000000   -9999.000000       0.039000   -9999.000000
56038     56038     sichuan        98.1000        32.9833          108       112     2012      02        29        060              0.000000   -9999.000000       0.937332   -9999.000000   -9999.000000   -9999.000000   -9999.000000   -9999.000000
56038     56038     sichuan        98.1000        32.9833          108       112     2012      03        01        061              0.026348       0.116516       1.555753       0.152714   -9999.000000   -9999.000000       0.026400   -9999.000000
56038     56038     sichuan        98.1000        32.9833          108       112     2012      03        02        062              0.025125      -3.257202       4.047742       0.116614   -9999.000000   -9999.000000   -9999.000000       0.190000
56038     56038     sichuan        98.1000        32.9833          108       112     2012      03        03        063              0.023833      -4.130585       4.435964       0.109335   -9999.000000   -9999.000000   -9999.000000       0.024000
56038     56038     sichuan        98.1000        32.9833          108       112     2012      03        04        064              0.023000      -5.912659       2.080099       0.097977   -9999.000000   -9999.000000       0.044000   -9999.000000
56038     56038     sichuan        98.1000        32.9833          108       112     2012      03        05        065              0.023750      -5.459259       2.279758       0.095696   -9999.000000   -9999.000000       0.033800       0.259000
56038     56038     sichuan        98.1000        32.9833          108       112     2012      03        06        066              0.029750      -1.155731       1.677819       0.136225   -9999.000000   -9999.000000       0.036500   -9999.000000
56038     56038     sichuan        98.1000        32.9833          108       112     2012      03        07        067              0.000000       0.449585       0.968931       0.157738   -9999.000000   -9999.000000   -9999.000000       0.096000
56038     56038     sichuan        98.1000        32.9833          108       112     2012      03        08        068              0.032875       0.303040      19.805889       0.156579   -9999.000000   -9999.000000   -9999.000000   -9999.000000
56038     56038     sichuan        98.1000        32.9833          108       112     2012      03        09        069              0.031917      -2.360840       7.023067       0.126581   -9999.000000   -9999.000000   -9999.000000   -9999.000000
56038     56038     sichuan        98.1000        32.9833          108       112     2012      03        10        070              0.029708      -6.420807       4.060904       0.092803   -9999.000000   -9999.000000       0.028500       0.295000
56038     56038     sichuan        98.1000        32.9833          108       112     2012      03        11        071              0.030458      -5.383240       5.317582       0.091621   -9999.000000   -9999.000000       0.045100   -9999.000000
56038     56038     sichuan        98.1000        32.9833          108       112     2012      03        12        072              0.030500      -3.880524       1.329048       0.103414   -9999.000000   -9999.000000       0.032800       0.287000
56038     56038     sichuan        98.1000        32.9833          108       112     2012      03        13        073              0.028818      -4.506653       2.974417       0.107121   -9999.000000   -9999.000000   -9999.000000   -9999.000000
56038     56038     sichuan        98.1000        32.9833          108       112     2012      03        14        074              0.031850      -3.942413       3.212403       0.102045   -9999.000000   -9999.000000   -9999.000000   -9999.000000
56038     56038     sichuan        98.1000        32.9833          108       112     2012      03        15        075              0.030583      -3.600372       1.913287       0.109573   -9999.000000   -9999.000000       0.017900       0.386000
56038     56038     sichuan        98.1000        32.9833          108       112     2012      03        16        076              0.030000      -2.972931       2.865793       0.112026   -9999.000000   -9999.000000       0.015300   -9999.000000
56038     56038     sichuan        98.1000        32.9833          108       112     2012      03        17        077              0.000000      -4.700836       2.980944       0.105813   -9999.000000   -9999.000000       0.024500       0.380000
56038     56038     sichuan        98.1000        32.9833          108       112     2012      03        18        078              0.000000      -4.320251       1.065118       0.106529   -9999.000000   -9999.000000       0.024100   -9999.000000
56038     56038     sichuan        98.1000        32.9833          108       112     2012      03        19        079              0.000000      -2.661835       0.000000       0.122965   -9999.000000   -9999.000000   -9999.000000   -9999.000000
56038     56038     sichuan        98.1000        32.9833          108       112     2012      03        20        080              0.000000      -0.744263       0.000000       0.146155   -9999.000000   -9999.000000   -9999.000000       0.616000
56038     56038     sichuan        98.1000        32.9833          108       112     2012      03        21        081              0.000000       1.548187       0.000000       0.176196   -9999.000000   -9999.000000       0.028000   -9999.000000
56038     56038     sichuan        98.1000        32.9833          108       112     2012      03        22        082              0.000000       2.820435       0.000000       0.189221   -9999.000000   -9999.000000       0.038000       0.640000
56038     56038     sichuan        98.1000        32.9833          108       112     2012      03        23        083              0.000000       1.329987       0.000000       0.171288   -9999.000000   -9999.000000       0.054800   -9999.000000
56038     56038     sichuan        98.1000        32.9833          108       112     2012      03        24        084              0.000000       1.295258       0.000000       0.167749   -9999.000000   -9999.000000   -9999.000000       0.881000
56038     56038     sichuan        98.1000        32.9833          108       112     2012      03        25        085              0.000000       2.615997       0.344643       0.179278   -9999.000000   -9999.000000   -9999.000000       0.611000
56038     56038     sichuan        98.1000        32.9833          108       112     2012      03        26        086              0.093000       1.669922       0.000000       0.173144   -9999.000000   -9999.000000   -9999.000000   -9999.000000
56038     56038     sichuan        98.1000        32.9833          108       112     2012      03        27        087              0.125500       3.694336       0.000000       0.190983   -9999.000000   -9999.000000       0.036700       0.643000
56038     56038     sichuan        98.1000        32.9833          108       112     2012      03        28        088              0.172500       4.733551       0.000000       0.194186   -9999.000000   -9999.000000       0.095200   -9999.000000
56038     56038     sichuan        98.1000        32.9833          108       112     2012      03        29        089              0.193231       5.714172       0.000000       0.201493   -9999.000000   -9999.000000       0.077100       0.863000
56038     56038     sichuan        98.1000        32.9833          108       112     2012      03        30        090              0.155708       3.074707       1.228739       0.180215   -9999.000000   -9999.000000   -9999.000000   -9999.000000
56038     56038     sichuan        98.1000        32.9833          108       112     2012      03        31        091              0.132250      -0.518188       0.855339       0.147126   -9999.000000   -9999.000000   -9999.000000       0.670000
56038     56038     sichuan        98.1000        32.9833          108       112     2012      04        01        092              0.118792       1.852142       0.000000       0.162437   -9999.000000   -9999.000000       0.041800       0.594000
56038     56038     sichuan        98.1000        32.9833          108       112     2012      04        02        093              0.146250       4.600739       0.000000       0.183738   -9999.000000   -9999.000000       0.041800   -9999.000000
56038     56038     sichuan        98.1000        32.9833          108       112     2012      04        03        094              0.166875       7.097809       0.000000       0.198327   -9999.000000   -9999.000000       0.086300       0.854000
56038     56038     sichuan        98.1000        32.9833          108       112     2012      04        04        095              0.164542       8.530029       1.986889       0.201800   -9999.000000   -9999.000000   -9999.000000   -9999.000000
56038     56038     sichuan        98.1000        32.9833          108       112     2012      04        05        096              0.157625       6.977570       0.466276       0.198680   -9999.000000   -9999.000000   -9999.000000       0.586000
56038     56038     sichuan        98.1000        32.9833          108       112     2012      04        06        097              0.160208       2.172363       0.505449       0.178230   -9999.000000   -9999.000000   -9999.000000   -9999.000000
56038     56038     sichuan        98.1000        32.9833          108       112     2012      04        07        098              0.157333       2.343445       0.320190       0.182381   -9999.000000   -9999.000000       0.035900   -9999.000000
56038     56038     sichuan        98.1000        32.9833          108       112     2012      04        08        099              0.147542       2.498535       0.000000       0.181383   -9999.000000   -9999.000000       0.068000       0.768000
56038     56038     sichuan        98.1000        32.9833          108       112     2012      04        09        100              0.134375       3.026794       0.000000       0.180083   -9999.000000   -9999.000000       0.067100   -9999.000000
56038     56038     sichuan        98.1000        32.9833          108       112     2012      04        10        101              0.130292       3.835236       0.000000       0.184887   -9999.000000   -9999.000000   -9999.000000       0.651000
56038     56038     sichuan        98.1000        32.9833          108       112     2012      04        11        102              0.132750       4.424164       0.329054       0.187100   -9999.000000   -9999.000000   -9999.000000   -9999.000000
56038     56038     sichuan        98.1000        32.9833          108       112     2012      04        12        103              0.137583       6.624695       6.625022       0.195462       0.130000   -9999.000000       0.053000   -9999.000000
56038     56038     sichuan        98.1000        32.9833          108       112     2012      04        13        104              0.141417       3.125305       6.723119       0.189351   -9999.000000   -9999.000000       0.042900       0.709000
56038     56038     sichuan        98.1000        32.9833          108       112     2012      04        14        105              0.142667       2.548584       1.393911       0.185058   -9999.000000   -9999.000000       0.083400   -9999.000000
56038     56038     sichuan        98.1000        32.9833          108       112     2012      04        15        106              0.138917       3.697784       0.000000       0.188405   -9999.000000   -9999.000000       0.082600       0.735000
56038     56038     sichuan        98.1000        32.9833          108       112     2012      04        16        107              0.141667       5.029297       0.758629       0.200268   -9999.000000   -9999.000000   -9999.000000   -9999.000000
56038     56038     sichuan        98.1000        32.9833          108       112     2012      04        17        108              0.135583       2.135834      10.074469       0.174991   -9999.000000   -9999.000000   -9999.000000       0.752000
56038     56038     sichuan        98.1000        32.9833          108       112     2012      04        18        109              0.128792       2.249878       0.000000       0.172747   -9999.000000   -9999.000000   -9999.000000       0.818000
56038     56038     sichuan        98.1000        32.9833          108       112     2012      04        19        110              0.126333       4.869110      33.410378       0.190938   -9999.000000   -9999.000000       0.037000   -9999.000000
56038     56038     sichuan        98.1000        32.9833          108       112     2012      04        20        111              0.116083       3.769226       0.000000       0.182994   -9999.000000   -9999.000000   -9999.000000       0.739000
56038     56038     sichuan        98.1000        32.9833          108       112     2012      04        21        112              0.112708       4.563965       6.939801       0.180653   -9999.000000   -9999.000000   -9999.000000   -9999.000000
56038     56038     sichuan        98.1000        32.9833          108       112     2012      04        22        113              0.111958       6.835724       0.000000       0.193652   -9999.000000   -9999.000000   -9999.000000       0.828000
56038     56038     sichuan        98.1000        32.9833          108       112     2012      04        23        114              0.114708       9.043121       0.000000       0.201724   -9999.000000   -9999.000000   -9999.000000       0.780000
56038     56038     sichuan        98.1000        32.9833          108       112     2012      04        24        115              0.107750       6.652649       0.000000       0.198878   -9999.000000   -9999.000000       0.045100   -9999.000000
56038     56038     sichuan        98.1000        32.9833          108       112     2012      04        25        116              0.000000       6.346008       0.000000       0.189933   -9999.000000   -9999.000000       0.092600       0.780000
56038     56038     sichuan        98.1000        32.9833          108       112     2012      04        26        117              0.099917       8.058411       0.115495       0.189779   -9999.000000   -9999.000000       0.082100   -9999.000000
56038     56038     sichuan        98.1000        32.9833          108       112     2012      04        27        118              0.098500       8.610229       3.985937       0.194699   -9999.000000   -9999.000000   -9999.000000       0.942000
56038     56038     sichuan        98.1000        32.9833          108       112     2012      04        28        119              0.097000       8.140686       0.000000       0.195373   -9999.000000   -9999.000000   -9999.000000   -9999.000000
56038     56038     sichuan        98.1000        32.9833          108       112     2012      04        29        120              0.095583       9.543732       0.327396       0.194444   -9999.000000   -9999.000000       0.039800       0.937000
56038     56038     sichuan        98.1000        32.9833          108       112     2012      04        30        121              0.118125       9.221069       0.000000       0.195360   -9999.000000   -9999.000000       0.056300       0.957000
56038     56038     sichuan        98.1000        32.9833          108       112     2012      05        01        122              0.127417      10.438812       1.896667       0.192249   -9999.000000   -9999.000000       0.092000   -9999.000000
56038     56038     sichuan        98.1000        32.9833          108       112     2012      05        02        123              0.119458       8.798035       0.882482       0.206060   -9999.000000   -9999.000000       0.091200       0.900000
56038     56038     sichuan        98.1000        32.9833          108       112     2012      05        03        124              0.162208       8.835968       0.070446       0.204631       0.138000   -9999.000000   -9999.000000   -9999.000000
56038     56038     sichuan        98.1000        32.9833          108       112     2012      05        04        125              0.243375       9.640045       0.000000       0.199477       0.115000   -9999.000000   -9999.000000       0.869000
56038     56038     sichuan        98.1000        32.9833          108       112     2012      05        05        126              0.283667      10.749847       0.000000       0.194722       0.114000   -9999.000000       0.050500   -9999.000000
56038     56038     sichuan        98.1000        32.9833          108       112     2012      05        06        127              0.028864      10.617462       0.000000       0.191013       0.091000   -9999.000000       0.053000   -9999.000000
56038     56038     sichuan        98.1000        32.9833          108       112     2012      05        07        128              0.000000      12.099426       0.000000       0.184918   -9999.000000   -9999.000000       0.085300       0.842000
56038     56038     sichuan        98.1000        32.9833          108       112     2012      05        08        129              0.000000      12.110657       2.001048       0.180871   -9999.000000   -9999.000000   -9999.000000   -9999.000000
56038     56038     sichuan        98.1000        32.9833          108       112     2012      05        09        130              0.000000      10.340271       0.897571       0.199757       0.110000   -9999.000000   -9999.000000       0.839000
56038     56038     sichuan        98.1000        32.9833          108       112     2012      05        10        131              0.000000      12.285950       0.134555       0.192032       0.112000   -9999.000000   -9999.000000   -9999.000000
56038     56038     sichuan        98.1000        32.9833          108       112     2012      05        11        132              0.000000      12.297272       1.454469       0.185648       0.105000       0.184200       0.058900   -9999.000000
56038     56038     sichuan        98.1000        32.9833          108       112     2012      05        12        133              0.000000      12.266113       0.178845       0.184363   -9999.000000   -9999.000000       0.090200       0.886000
56038     56038     sichuan        98.1000        32.9833          108       112     2012      05        13        134              0.000000      10.448120       0.594517       0.197919   -9999.000000   -9999.000000       0.088400   -9999.000000
56038     56038     sichuan        98.1000        32.9833          108       112     2012      05        14        135              0.000000       8.521484       0.941171       0.195140       0.137000   -9999.000000   -9999.000000       0.873000
56038     56038     sichuan        98.1000        32.9833          108       112     2012      05        15        136              0.000000       9.177155       1.008658       0.197661       0.128000   -9999.000000   -9999.000000   -9999.000000
56038     56038     sichuan        98.1000        32.9833          108       112     2012      05        16        137              0.000000      10.936127       0.000000       0.194823       0.127000   -9999.000000       0.069100       0.833000
56038     56038     sichuan        98.1000        32.9833          108       112     2012      05        17        138              0.000000       8.952209       0.521654       0.200073   -9999.000000   -9999.000000       0.062800       0.802000
56038     56038     sichuan        98.1000        32.9833          108       112     2012      05        18        139              0.000000       7.304626       4.990822       0.201459   -9999.000000   -9999.000000       0.091700   -9999.000000
56038     56038     sichuan        98.1000        32.9833          108       112     2012      05        19        140              0.000000      12.375854       0.000000       0.197735       0.120000       0.119100       0.084700       0.848000
56038     56038     sichuan        98.1000        32.9833          108       112     2012      05        20        141              0.000000      13.736481       0.000000       0.226594       0.123000   -9999.000000   -9999.000000   -9999.000000
56038     56038     sichuan        98.1000        32.9833          108       112     2012      05        21        142              0.000000      15.578857       2.455446       0.201451       0.142000   -9999.000000   -9999.000000       0.797000
56038     56038     sichuan        98.1000        32.9833          108       112     2012      05        22        143              0.000000      12.197418       0.941071       0.215521   -9999.000000   -9999.000000       0.111700       0.830000
56038     56038     sichuan        98.1000        32.9833          108       112     2012      05        23        144              0.000000      10.912750       7.589550       0.216627   -9999.000000   -9999.000000       0.091900   -9999.000000
56038     56038     sichuan        98.1000        32.9833          108       112     2012      05        24        145              0.000000      12.136139       0.594332       0.233745       0.188000   -9999.000000       0.139300       0.970000
56038     56038     sichuan        98.1000        32.9833          108       112     2012      05        25        146              0.000000       9.680573       0.000000       0.250076       0.167000   -9999.000000   -9999.000000   -9999.000000
56038     56038     sichuan        98.1000        32.9833          108       112     2012      05        26        147              0.128167      13.099701       0.083719       0.227907       0.142000       0.163500   -9999.000000       0.851000
56038     56038     sichuan        98.1000        32.9833          108       112     2012      05        27        148              0.033389      15.571472       0.833026       0.212601       0.133000       0.169700   -9999.000000   -9999.000000
56038     56038     sichuan        98.1000        32.9833          108       112     2012      05        28        149              0.015500      15.005920       0.213066       0.210144   -9999.000000   -9999.000000       0.093100       0.789000
56038     56038     sichuan        98.1000        32.9833          108       112     2012      05        29        150              0.015261      13.162323       0.699514       0.207131       0.134000       0.258200       0.088000   -9999.000000
56038     56038     sichuan        98.1000        32.9833          108       112     2012      05        30        151              0.035792      13.418213       7.691809       0.200669   -9999.000000   -9999.000000       0.098800   -9999.000000
56038     56038     sichuan        98.1000        32.9833          108       112     2012      05        31        152              0.109000      12.833893       2.032404       0.242316       0.166000   -9999.000000   -9999.000000   -9999.000000
56038     56038     sichuan        98.1000        32.9833          108       112     2012      06        01        153              0.121917      10.289734       0.500586       0.245912       0.203000       0.324800   -9999.000000   -9999.000000
56038     56038     sichuan        98.1000        32.9833          108       112     2012      06        02        154              0.132458      13.898224       4.369689       0.229492   -9999.000000   -9999.000000       0.114300       0.922000
56038     56038     sichuan        98.1000        32.9833          108       112     2012      06        03        155              0.158250      11.947235       5.960516       0.240127   -9999.000000   -9999.000000       0.136700   -9999.000000
56038     56038     sichuan        98.1000        32.9833          108       112     2012      06        04        156              0.230875       9.878052      10.261348       0.258149       0.254000   -9999.000000       0.161300   -9999.000000
56038     56038     sichuan        98.1000        32.9833          108       112     2012      06        05        157              0.241667      11.316040       2.010674       0.279500       0.228000   -9999.000000       0.150700       1.000000
56038     56038     sichuan        98.1000        32.9833          108       112     2012      06        06        158              0.249125      11.739624       2.458402       0.267961       0.227000   -9999.000000   -9999.000000   -9999.000000
56038     56038     sichuan        98.1000        32.9833          108       112     2012      06        07        159              0.230792      10.612946       4.911430       0.267751   -9999.000000   -9999.000000   -9999.000000       0.994000
56038     56038     sichuan        98.1000        32.9833          108       112     2012      06        08        160              0.236875      14.330322       0.967414       0.259848   -9999.000000   -9999.000000       0.137200   -9999.000000
56038     56038     sichuan        98.1000        32.9833          108       112     2012      06        09        161              0.248125      11.906647       5.586666       0.264660   -9999.000000   -9999.000000       0.146900   -9999.000000
56038     56038     sichuan        98.1000        32.9833          108       112     2012      06        10        162              0.248500      10.677338       6.276487       0.272457       0.235000   -9999.000000       0.136400       1.000000
56038     56038     sichuan        98.1000        32.9833          108       112     2012      06        11        163              0.000000      11.292877       1.254126       0.274565       0.286000   -9999.000000   -9999.000000   -9999.000000
56038     56038     sichuan        98.1000        32.9833          108       112     2012      06        12        164              0.240583      12.069733       1.084086       0.270268   -9999.000000   -9999.000000   -9999.000000       1.000000
56038     56038     sichuan        98.1000        32.9833          108       112     2012      06        13        165              0.236333      13.309296       0.770276       0.260330   -9999.000000       0.398700   -9999.000000   -9999.000000
56038     56038     sichuan        98.1000        32.9833          108       112     2012      06        14        166              0.227208      14.199371       4.631349       0.251992       0.296000   -9999.000000       0.150700       0.960000
56038     56038     sichuan        98.1000        32.9833          108       112     2012      06        15        167              0.225625      13.182068       5.184697       0.259849       0.298000   -9999.000000       0.151900       0.993000
56038     56038     sichuan        98.1000        32.9833          108       112     2012      06        16        168              0.220958      13.145630       3.133230       0.268208       0.280000   -9999.000000       0.148300   -9999.000000
56038     56038     sichuan        98.1000        32.9833          108       112     2012      06        17        169              0.237750      13.706543       1.861152       0.267541       0.260000   -9999.000000   -9999.000000       1.000000
56038     56038     sichuan        98.1000        32.9833          108       112     2012      06        18        170              0.232750      13.134674       0.000000       0.268832   -9999.000000       0.420800   -9999.000000   -9999.000000
56038     56038     sichuan        98.1000        32.9833          108       112     2012      06        19        171              0.220833      14.179443       0.000000       0.254382   -9999.000000       0.290700       0.174400       0.913000
56038     56038     sichuan        98.1000        32.9833          108       112     2012      06        20        172              0.211958      14.741425       1.869768       0.244634       0.257000   -9999.000000       0.176700       0.925000
56038     56038     sichuan        98.1000        32.9833          108       112     2012      06        21        173              0.210917      14.664795       1.671588       0.243613       0.331000   -9999.000000       0.171600   -9999.000000
56038     56038     sichuan        98.1000        32.9833          108       112     2012      06        22        174              0.204917      14.056122       1.219063       0.250345       0.292000   -9999.000000   -9999.000000       0.931000
56038     56038     sichuan        98.1000        32.9833          108       112     2012      06        23        175              0.193667      16.274017       0.844790       0.243316   -9999.000000       0.623700   -9999.000000   -9999.000000
56038     56038     sichuan        98.1000        32.9833          108       112     2012      06        24        176              0.194542      15.737793       9.969735       0.240778   -9999.000000       0.226200   -9999.000000       1.000000
56038     56038     sichuan        98.1000        32.9833          108       112     2012      06        25        177              0.209042      13.806366       3.103513       0.267028       0.333000   -9999.000000       0.208400   -9999.000000
56038     56038     sichuan        98.1000        32.9833          108       112     2012      06        26        178              0.214895      13.831879      16.608381       0.270459       0.317000       0.276100       0.206200       0.963000
56038     56038     sichuan        98.1000        32.9833          108       112     2012      06        27        179              0.257227      15.738068       2.552574       0.278381       0.316000   -9999.000000       0.203600       1.000000
56038     56038     sichuan        98.1000        32.9833          108       112     2012      06        28        180              0.265409      15.712860       0.848468       0.285855   -9999.000000       0.267400   -9999.000000   -9999.000000
56038     56038     sichuan        98.1000        32.9833          108       112     2012      06        29        181              0.249727      15.911285       7.208884       0.271984       0.355000       0.236700   -9999.000000       0.986000
56038     56038     sichuan        98.1000        32.9833          108       112     2012      06        30        182              0.238091      16.435364       3.137951       0.278768       0.298500   -9999.000000   -9999.000000   -9999.000000
56038     56038     sichuan        98.1000        32.9833          108       112     2012      07        01        183              0.245250      16.870117       6.361494       0.272922       0.451500       0.347800       0.203200       1.000000
56038     56038     sichuan        98.1000        32.9833          108       112     2012      07        02        184              0.249958      14.974091       4.460473       0.283188   -9999.000000       0.247500       0.223800   -9999.000000
56038     56038     sichuan        98.1000        32.9833          108       112     2012      07        03        185              0.277542      16.445190       9.907850       0.270756   -9999.000000       0.409600       0.233400   -9999.000000
56038     56038     sichuan        98.1000        32.9833          108       112     2012      07        04        186              0.265417      12.135529       0.065853       0.294986   -9999.000000       0.233300   -9999.000000       0.996000
56038     56038     sichuan        98.1000        32.9833          108       112     2012      07        05        187              0.252542      13.710602       7.939894       0.273547   -9999.000000   -9999.000000   -9999.000000   -9999.000000
56038     56038     sichuan        98.1000        32.9833          108       112     2012      07        06        188              0.261458      16.509583       1.598940       0.276206   -9999.000000       0.432200       0.223000       1.000000
56038     56038     sichuan        98.1000        32.9833          108       112     2012      07        07        189              0.269500      15.927338       5.407969       0.275287   -9999.000000       0.203100       0.238200   -9999.000000
56038     56038     sichuan        98.1000        32.9833          108       112     2012      07        08        190              0.262667      14.825958       6.073577       0.280969       0.435000   -9999.000000       0.216200   -9999.000000
56038     56038     sichuan        98.1000        32.9833          108       112     2012      07        09        191              0.265542      17.064636       1.041532       0.277449   -9999.000000       0.390100   -9999.000000       0.980000
56038     56038     sichuan        98.1000        32.9833          108       112     2012      07        10        192              0.282375      15.675781      16.984119       0.275028   -9999.000000   -9999.000000   -9999.000000   -9999.000000
56038     56038     sichuan        98.1000        32.9833          108       112     2012      07        11        193              0.280708      15.451263       0.924179       0.290373       0.480000       0.407500   -9999.000000       0.936000
56038     56038     sichuan        98.1000        32.9833          108       112     2012      07        12        194              0.272500      14.189178       0.033493       0.286700       0.500000       0.475500       0.241500   -9999.000000
56038     56038     sichuan        98.1000        32.9833          108       112     2012      07        13        195              0.259500      15.295990       5.838026       0.271270       0.462000   -9999.000000       0.239100       0.993000
56038     56038     sichuan        98.1000        32.9833          108       112     2012      07        14        196              0.286292      16.282745       3.930989       0.274028   -9999.000000       0.378000       0.247200       1.000000
56038     56038     sichuan        98.1000        32.9833          108       112     2012      07        15        197              0.302167      14.904724      14.812054       0.278461       0.497000   -9999.000000   -9999.000000   -9999.000000
56038     56038     sichuan        98.1000        32.9833          108       112     2012      07        16        198              0.300125      14.385254      18.099659       0.296464       0.500000       0.313600   -9999.000000       0.956000
56038     56038     sichuan        98.1000        32.9833          108       112     2012      07        17        199              0.301042      15.663086      18.248020       0.305568       0.447000       0.309100       0.282600   -9999.000000
56038     56038     sichuan        98.1000        32.9833          108       112     2012      07        18        200              0.301708      15.948212       1.381295       0.309219       0.475000   -9999.000000       0.285000       0.930000
56038     56038     sichuan        98.1000        32.9833          108       112     2012      07        19        201              0.292750      14.720551       1.715597       0.296580   -9999.000000       0.289700       0.278400       0.982000
56038     56038     sichuan        98.1000        32.9833          108       112     2012      07        20        202              0.285500      15.986664       6.447936       0.283917   -9999.000000       0.272700       0.233900   -9999.000000
56038     56038     sichuan        98.1000        32.9833          108       112     2012      07        21        203              0.295130      15.966522       2.562716       0.287568   -9999.000000       0.466700   -9999.000000       0.926000
56038     56038     sichuan        98.1000        32.9833          108       112     2012      07        22        204              0.311833      15.486237       6.437649       0.282145   -9999.000000       0.278700   -9999.000000   -9999.000000
56038     56038     sichuan        98.1000        32.9833          108       112     2012      07        23        205              0.293750      12.786713       0.985230       0.289803   -9999.000000   -9999.000000       0.302100       0.964000
56038     56038     sichuan        98.1000        32.9833          108       112     2012      07        24        206              0.286958      14.913177       0.203874       0.274024   -9999.000000       0.350700       0.274500   -9999.000000
56038     56038     sichuan        98.1000        32.9833          108       112     2012      07        25        207              0.270042      14.127930      13.719543       0.266365   -9999.000000       0.349400       0.297400       0.950000
56038     56038     sichuan        98.1000        32.9833          108       112     2012      07        26        208              0.209438      16.867065      13.992188       0.269806   -9999.000000   -9999.000000   -9999.000000       0.878000
56038     56038     sichuan        98.1000        32.9833          108       112     2012      07        27        209              0.217042      15.134491       0.102512       0.308401   -9999.000000       0.600700   -9999.000000   -9999.000000
56038     56038     sichuan        98.1000        32.9833          108       112     2012      07        28        210              0.203708      16.386108       0.067699       0.284832   -9999.000000   -9999.000000   -9999.000000       0.909000
56038     56038     sichuan        98.1000        32.9833          108       112     2012      07        29        211              0.185667      17.819611       0.000000       0.269434   -9999.000000       0.485900       0.273600   -9999.000000
56038     56038     sichuan        98.1000        32.9833          108       112     2012      07        30        212              0.170083      18.783173       7.910024       0.259552   -9999.000000       0.456100       0.241400       0.896000
56038     56038     sichuan        98.1000        32.9833          108       112     2012      07        31        213              0.190792      17.602905       0.550367       0.274671   -9999.000000   -9999.000000       0.271300   -9999.000000
56038     56038     sichuan        98.1000        32.9833          108       112     2012      08        01        214              0.188083      13.044434       0.000000       0.272150   -9999.000000       0.330100   -9999.000000   -9999.000000
56038     56038     sichuan        98.1000        32.9833          108       112     2012      08        02        215              0.175708      15.019989       0.000000       0.259701   -9999.000000   -9999.000000   -9999.000000       0.857000
56038     56038     sichuan        98.1000        32.9833          108       112     2012      08        03        216              0.245125      15.892822       2.586941       0.252712   -9999.000000       0.280200       0.242200   -9999.000000
56038     56038     sichuan        98.1000        32.9833          108       112     2012      08        04        217              0.286625      15.455200       3.102382       0.258857   -9999.000000       0.349400       0.238000       0.703000
56038     56038     sichuan        98.1000        32.9833          108       112     2012      08        05        218              0.290417      16.774780       2.074384       0.256818   -9999.000000   -9999.000000       0.242000   -9999.000000
56038     56038     sichuan        98.1000        32.9833          108       112     2012      08        06        219              0.297542      17.084320       7.143477       0.257297   -9999.000000       0.288700       0.249300   -9999.000000
56038     56038     sichuan        98.1000        32.9833          108       112     2012      08        07        220              0.302208      15.048767       0.190316       0.276375   -9999.000000       0.301100   -9999.000000       0.837000
56038     56038     sichuan        98.1000        32.9833          108       112     2012      08        08        221              0.302375      16.452850       1.462930       0.261050       0.500000       0.318600   -9999.000000   -9999.000000
56038     56038     sichuan        98.1000        32.9833          108       112     2012      08        09        222              0.302667      17.647461       2.462632       0.257666   -9999.000000       0.267500       0.239200       0.854000
56038     56038     sichuan        98.1000        32.9833          108       112     2012      08        10        223              0.303792      17.196014       4.533352       0.258604   -9999.000000   -9999.000000       0.258700   -9999.000000
56038     56038     sichuan        98.1000        32.9833          108       112     2012      08        11        224              0.303542      17.650757       0.564082       0.262048   -9999.000000       0.256900       0.245200       0.874000
56038     56038     sichuan        98.1000        32.9833          108       112     2012      08        12        225              0.299042      18.197357       0.000000       0.258920       0.478000       0.236800   -9999.000000       0.733000
56038     56038     sichuan        98.1000        32.9833          108       112     2012      08        13        226              0.287542      18.288361       2.350428       0.246378       0.479000   -9999.000000   -9999.000000   -9999.000000
56038     56038     sichuan        98.1000        32.9833          108       112     2012      08        14        227              0.277708      18.032501       0.982137       0.245808   -9999.000000       0.190300   -9999.000000       0.599000
56038     56038     sichuan        98.1000        32.9833          108       112     2012      08        15        228              0.270792      17.703217       0.726887       0.241445   -9999.000000   -9999.000000       0.190100   -9999.000000
56038     56038     sichuan        98.1000        32.9833          108       112     2012      08        16        229              0.267875      17.679382      12.352427       0.239650   -9999.000000       0.247600       0.193900       0.702000
56038     56038     sichuan        98.1000        32.9833          108       112     2012      08        17        230              0.267708      15.697296       0.338570       0.271357       0.500000   -9999.000000       0.201800       0.884000
56038     56038     sichuan        98.1000        32.9833          108       112     2012      08        18        231              0.265917      15.354919       0.068751       0.270914       0.490000   -9999.000000   -9999.000000   -9999.000000
56038     56038     sichuan        98.1000        32.9833          108       112     2012      08        19        232              0.264417      13.287445       0.000000       0.259452       0.462000       0.245300   -9999.000000       0.747000
56038     56038     sichuan        98.1000        32.9833          108       112     2012      08        20        233              0.262208      13.262238       1.329516       0.252362   -9999.000000   -9999.000000       0.291300   -9999.000000
56038     56038     sichuan        98.1000        32.9833          108       112     2012      08        21        234              0.273625      14.225555       5.479216       0.248335   -9999.000000       0.161200       0.293100       0.777000
56038     56038     sichuan        98.1000        32.9833          108       112     2012      08        22        235              0.284542      12.384155       3.909114       0.270267   -9999.000000       0.235900       0.273800   -9999.000000
56038     56038     sichuan        98.1000        32.9833          108       112     2012      08        23        236              0.292917      13.648712       6.451528       0.267353   -9999.000000   -9999.000000       0.280700       0.776000
56038     56038     sichuan        98.1000        32.9833          108       112     2012      08        24        237              0.300875      13.644714       1.075508       0.278248       0.500000       0.244000   -9999.000000   -9999.000000
56038     56038     sichuan        98.1000        32.9833          108       112     2012      08        25        238              0.000000      14.238831       0.000000       0.266215   -9999.000000   -9999.000000   -9999.000000   -9999.000000
56038     56038     sichuan        98.1000        32.9833          108       112     2012      08        26        239              0.291833      14.290070       0.000000       0.258322       0.500000       0.151900       0.259900       0.682000
56038     56038     sichuan        98.1000        32.9833          108       112     2012      08        27        240              0.281250      15.719055       0.097339       0.249562   -9999.000000       0.237100       0.235700   -9999.000000
56038     56038     sichuan        98.1000        32.9833          108       112     2012      08        28        241              0.276542      12.320953       1.747671       0.248512   -9999.000000   -9999.000000       0.221100       0.772000
56038     56038     sichuan        98.1000        32.9833          108       112     2012      08        29        242              0.278708      15.849457       6.677297       0.246372   -9999.000000       0.333100   -9999.000000   -9999.000000
56038     56038     sichuan        98.1000        32.9833          108       112     2012      08        30        243              0.328083      14.972870       2.828316       0.264174       0.500000       0.292300   -9999.000000   -9999.000000
56038     56038     sichuan        98.1000        32.9833          108       112     2012      08        31        244              0.328167      13.545197       3.533891       0.272383       0.485000   -9999.000000   -9999.000000       0.881000
56038     56038     sichuan        98.1000        32.9833          108       112     2012      09        01        245              0.324667      12.345978      11.500583       0.269020   -9999.000000       0.296600       0.241500   -9999.000000
56038     56038     sichuan        98.1000        32.9833          108       112     2012      09        02        246              0.318125      11.910828       1.383547       0.258062   -9999.000000   -9999.000000       0.248200       0.633000
56038     56038     sichuan        98.1000        32.9833          108       112     2012      09        03        247              0.310500      12.685089       0.118144       0.249763   -9999.000000       0.483300       0.261800   -9999.000000
56038     56038     sichuan        98.1000        32.9833          108       112     2012      09        04        248              0.303542      12.454620       1.045731       0.244854       0.313000       0.253100   -9999.000000   -9999.000000
56038     56038     sichuan        98.1000        32.9833          108       112     2012      09        05        249              0.296083      13.200409       0.118111       0.240020       0.365000   -9999.000000   -9999.000000       0.667000
56038     56038     sichuan        98.1000        32.9833          108       112     2012      09        06        250              0.288958      14.375122       1.385467       0.235713   -9999.000000       0.244900       0.241000   -9999.000000
56038     56038     sichuan        98.1000        32.9833          108       112     2012      09        07        251              0.282000      15.481201       0.514601       0.237901   -9999.000000   -9999.000000       0.247400       0.562000
56038     56038     sichuan        98.1000        32.9833          108       112     2012      09        08        252              0.277542      13.795471       1.020728       0.239477       0.357000       0.373500       0.239400   -9999.000000
56038     56038     sichuan        98.1000        32.9833          108       112     2012      09        09        253              0.281875      15.431763      14.961995       0.233555       0.427000       0.209500   -9999.000000       0.558000
56038     56038     sichuan        98.1000        32.9833          108       112     2012      09        10        254              0.327458      13.853943       2.495612       0.268485       0.380000   -9999.000000   -9999.000000       0.930000
56038     56038     sichuan        98.1000        32.9833          108       112     2012      09        11        255              0.329167      12.359314       2.545668       0.279508       0.295000       0.543500   -9999.000000   -9999.000000
56038     56038     sichuan        98.1000        32.9833          108       112     2012      09        12        256              0.326667      11.413086       1.084164       0.271020   -9999.000000       0.275300       0.213900       0.721000
56038     56038     sichuan        98.1000        32.9833          108       112     2012      09        13        257              0.320625      10.923889       0.866127       0.260293   -9999.000000       0.322100       0.230800   -9999.000000
56038     56038     sichuan        98.1000        32.9833          108       112     2012      09        14        258              0.315875      11.365570       0.385591       0.252269       0.293000       0.304400       0.222700       0.740000
56038     56038     sichuan        98.1000        32.9833          108       112     2012      09        15        259              0.315917      12.426727       3.246936       0.247625       0.306000   -9999.000000   -9999.000000       0.900000
56038     56038     sichuan        98.1000        32.9833          108       112     2012      09        16        260              0.328000      11.058258       0.103487       0.255996       0.338000   -9999.000000   -9999.000000   -9999.000000
56038     56038     sichuan        98.1000        32.9833          108       112     2012      09        17        261              0.323750      11.134308       0.474115       0.254639   -9999.000000       0.374400       0.224100       0.775000
56038     56038     sichuan        98.1000        32.9833          108       112     2012      09        18        262              0.319125      13.387726       0.000000       0.247955       0.320000   -9999.000000       0.208000   -9999.000000
56038     56038     sichuan        98.1000        32.9833          108       112     2012      09        19        263              0.314917      13.270111      15.780300       0.244852       0.332000       0.293500       0.208100       0.815000
56038     56038     sichuan        98.1000        32.9833          108       112     2012      09        20        264              0.333458      13.591187      20.334515       0.268796   -9999.000000   -9999.000000       0.221900   -9999.000000
56038     56038     sichuan        98.1000        32.9833          108       112     2012      09        21        265              0.334542      11.482422       2.174843       0.314542   -9999.000000   -9999.000000   -9999.000000       0.897000
56038     56038     sichuan        98.1000        32.9833          108       112     2012      09        22        266              0.330083      12.093323       1.313823       0.289322       0.285000       0.443600   -9999.000000       0.802000
56038     56038     sichuan        98.1000        32.9833          108       112     2012      09        23        267              0.326917      11.591583       0.861615       0.279047   -9999.000000   -9999.000000       0.194400   -9999.000000
56038     56038     sichuan        98.1000        32.9833          108       112     2012      09        24        268              0.323125      11.538177       4.906144       0.272302   -9999.000000       0.284200       0.180700       0.876000
56038     56038     sichuan        98.1000        32.9833          108       112     2012      09        25        269              0.330208       9.818451       3.180676       0.281823       0.265000   -9999.000000       0.202600   -9999.000000
56038     56038     sichuan        98.1000        32.9833          108       112     2012      09        26        270              0.328875       9.596771       2.596566       0.280506       0.276000       0.298100   -9999.000000       0.806000
56038     56038     sichuan        98.1000        32.9833          108       112     2012      09        27        271              0.328786      10.836823       0.871519       0.275364       0.271000       0.251000   -9999.000000   -9999.000000
56038     56038     sichuan        98.1000        32.9833          108       112     2012      09        28        272              0.323933      10.549225       0.084429       0.271329   -9999.000000   -9999.000000   -9999.000000   -9999.000000
56038     56038     sichuan        98.1000        32.9833          108       112     2012      09        29        273              0.321292      10.962250       1.213361       0.264390   -9999.000000       0.277300       0.181900       0.743000
56038     56038     sichuan        98.1000        32.9833          108       112     2012      09        30        274              0.320000       9.537170       0.114972       0.263412       0.280000   -9999.000000       0.204600   -9999.000000
56038     56038     sichuan        98.1000        32.9833          108       112     2012      10        01        275              0.315833      10.638092       0.708786       0.259747       0.204000       0.291600       0.133100       0.818000
56038     56038     sichuan        98.1000        32.9833          108       112     2012      10        02        276              0.311333      11.803680       1.901877       0.256663       0.199000       0.264900   -9999.000000   -9999.000000
56038     56038     sichuan        98.1000        32.9833          108       112     2012      10        03        277              0.307625      10.379089       0.992561       0.260503   -9999.000000   -9999.000000   -9999.000000   -9999.000000
56038     56038     sichuan        98.1000        32.9833          108       112     2012      10        04        278              0.308750       8.964661       3.414519       0.261606   -9999.000000       0.165200       0.114100       0.787000
56038     56038     sichuan        98.1000        32.9833          108       112     2012      10        05        279              0.325125       5.846344      18.775070       0.271190       0.238000   -9999.000000       0.129800   -9999.000000
56038     56038     sichuan        98.1000        32.9833          108       112     2012      10        06        280              0.342333       6.603760       2.742521       0.273257       0.241000   -9999.000000       0.134000       0.670000
56038     56038     sichuan        98.1000        32.9833          108       112     2012      10        07        281              0.339833       4.702118       0.137379       0.297291       0.264000   -9999.000000       0.141700   -9999.000000
56038     56038     sichuan        98.1000        32.9833          108       112     2012      10        08        282              0.332083       5.671326       0.000000       0.295398   -9999.000000   -9999.000000   -9999.000000       0.816000
56038     56038     sichuan        98.1000        32.9833          108       112     2012      10        09        283              0.336833       6.992462       0.141813       0.277938   -9999.000000   -9999.000000   -9999.000000       0.792000
56038     56038     sichuan        98.1000        32.9833          108       112     2012      10        10        284              0.341125       5.577606       0.149567       0.271938   -9999.000000   -9999.000000       0.077600   -9999.000000
56038     56038     sichuan        98.1000        32.9833          108       112     2012      10        11        285              0.342417       5.655701       0.000000       0.268356       0.168000   -9999.000000       0.083800       0.827000
56038     56038     sichuan        98.1000        32.9833          108       112     2012      10        12        286              0.341333       5.546906       0.000000       0.265306       0.162000   -9999.000000       0.101900   -9999.000000
56038     56038     sichuan        98.1000        32.9833          108       112     2012      10        13        287              0.334167       5.095367       0.408880       0.262577   -9999.000000   -9999.000000   -9999.000000       0.847000
56038     56038     sichuan        98.1000        32.9833          108       112     2012      10        14        288              0.328583       5.271240       0.416073       0.260056   -9999.000000   -9999.000000   -9999.000000       0.674000
56038     56038     sichuan        98.1000        32.9833          108       112     2012      10        15        289              0.322542       4.847229       5.814313       0.257463   -9999.000000       0.189000   -9999.000000   -9999.000000
56038     56038     sichuan        98.1000        32.9833          108       112     2012      10        16        290              0.310250       3.887848       9.706714       0.245710   -9999.000000   -9999.000000       0.060400       0.595000
56038     56038     sichuan        98.1000        32.9833          108       112     2012      10        17        291              0.301292       3.745056       1.306059       0.233452   -9999.000000       0.249500       0.078900   -9999.000000
56038     56038     sichuan        98.1000        32.9833          108       112     2012      10        18        292              0.301542       4.948975       2.032913       0.251451   -9999.000000       0.198500       0.062100       0.745000
56038     56038     sichuan        98.1000        32.9833          108       112     2012      10        19        293              0.301000       4.095154       4.213500       0.248621   -9999.000000       0.223200   -9999.000000   -9999.000000
56038     56038     sichuan        98.1000        32.9833          108       112     2012      10        20        294              0.298333       3.665009       1.115582       0.241266   -9999.000000   -9999.000000   -9999.000000       0.806000
56038     56038     sichuan        98.1000        32.9833          108       112     2012      10        21        295              0.294417       4.552765       2.212488       0.242322   -9999.000000   -9999.000000       0.063400       0.653000
56038     56038     sichuan        98.1000        32.9833          108       112     2012      10        22        296              0.293833       4.782623       0.241542       0.245463   -9999.000000       0.149500       0.053700   -9999.000000
56038     56038     sichuan        98.1000        32.9833          108       112     2012      10        23        297              0.291917       5.380127       3.616673       0.249153   -9999.000000       0.142200       0.055100       0.662000
56038     56038     sichuan        98.1000        32.9833          108       112     2012      10        24        298              0.290000       4.347107       2.484027       0.259723   -9999.000000   -9999.000000       0.071900   -9999.000000
56038     56038     sichuan        98.1000        32.9833          108       112     2012      10        25        299              0.000000       3.847260       2.317389       0.258492   -9999.000000       0.151100   -9999.000000       0.455000
56038     56038     sichuan        98.1000        32.9833          108       112     2012      10        26        300              0.267917       2.090118       2.974098       0.233262   -9999.000000   -9999.000000   -9999.000000   -9999.000000
56038     56038     sichuan        98.1000        32.9833          108       112     2012      10        27        301              0.267208       2.047699       1.935384       0.222687   -9999.000000       0.252900       0.048000   -9999.000000
56038     56038     sichuan        98.1000        32.9833          108       112     2012      10        28        302              0.000000       2.511810       2.866425       0.227707   -9999.000000       0.088600       0.059500       0.554000
56038     56038     sichuan        98.1000        32.9833          108       112     2012      10        29        303              0.263750       2.216797       2.629943       0.234221   -9999.000000   -9999.000000       0.055700   -9999.000000
56038     56038     sichuan        98.1000        32.9833          108       112     2012      10        30        304              0.254167       1.814362       2.020613       0.210547   -9999.000000       0.214200   -9999.000000       0.405000
56038     56038     sichuan        98.1000        32.9833          108       112     2012      10        31        305              0.247042       1.004822       1.606941       0.195153   -9999.000000   -9999.000000   -9999.000000   -9999.000000
56038     56038     sichuan        98.1000        32.9833          108       112     2012      11        01        306              0.240250       0.773315       1.737499       0.193368   -9999.000000       0.162600   -9999.000000   -9999.000000
56038     56038     sichuan        98.1000        32.9833          108       112     2012      11        02        307              0.231708       0.900024       0.559578       0.191476   -9999.000000       0.084500       0.047400       0.439000
56038     56038     sichuan        98.1000        32.9833          108       112     2012      11        03        308              0.220792       1.186523       1.107038       0.192088   -9999.000000   -9999.000000       0.039600   -9999.000000
56038     56038     sichuan        98.1000        32.9833          108       112     2012      11        04        309              0.207042       0.357117       0.437614       0.176457   -9999.000000       0.101600       0.042000       0.311000
56038     56038     sichuan        98.1000        32.9833          108       112     2012      11        05        310              0.212500       0.957306       1.176566       0.183649   -9999.000000       0.121100   -9999.000000   -9999.000000
56038     56038     sichuan        98.1000        32.9833          108       112     2012      11        06        311              0.216708       1.717926       0.103795       0.194941   -9999.000000   -9999.000000   -9999.000000       0.599000
56038     56038     sichuan        98.1000        32.9833          108       112     2012      11        07        312              0.210042       2.014954       0.160905       0.202406   -9999.000000       0.076300       0.036900       0.355000
56038     56038     sichuan        98.1000        32.9833          108       112     2012      11        08        313              0.206292       1.356781       0.503571       0.194141   -9999.000000   -9999.000000       0.041800   -9999.000000
56038     56038     sichuan        98.1000        32.9833          108       112     2012      11        09        314              0.204375       1.183258       4.090201       0.187046   -9999.000000       0.105600       0.037000       0.250000
56038     56038     sichuan        98.1000        32.9833          108       112     2012      11        10        315              0.195667       0.486115      28.796177       0.173261   -9999.000000       0.079900   -9999.000000   -9999.000000
56038     56038     sichuan        98.1000        32.9833          108       112     2012      11        11        316              0.179750      -0.058655       1.174812       0.162942   -9999.000000   -9999.000000   -9999.000000       0.328000
56038     56038     sichuan        98.1000        32.9833          108       112     2012      11        12        317              0.174417      -0.125793       2.589070       0.160937   -9999.000000       0.111000   -9999.000000       0.288000
56038     56038     sichuan        98.1000        32.9833          108       112     2012      11        13        318              0.000000      -0.844147       2.408412       0.152250   -9999.000000   -9999.000000       0.039300   -9999.000000
56038     56038     sichuan        98.1000        32.9833          108       112     2012      11        14        319              0.140125      -0.443024       0.000000       0.156386   -9999.000000       0.325000       0.025200       0.149000
56038     56038     sichuan        98.1000        32.9833          108       112     2012      11        15        320              0.138083       0.100525       4.553792       0.159465   -9999.000000       0.061300       0.029000   -9999.000000
56038     56038     sichuan        98.1000        32.9833          108       112     2012      11        16        321              0.115750      -0.162750       0.000000       0.147166   -9999.000000   -9999.000000   -9999.000000       0.196000
56038     56038     sichuan        98.1000        32.9833          108       112     2012      11        17        322              0.000000      -2.163391       0.000000       0.132252   -9999.000000       0.071100   -9999.000000   -9999.000000
56038     56038     sichuan        98.1000        32.9833          108       112     2012      11        18        323              0.101083      -1.760773       0.000000       0.142951   -9999.000000   -9999.000000       0.036200       0.160000
56038     56038     sichuan        98.1000        32.9833          108       112     2012      11        19        324              0.100167      -0.561462       0.000000       0.155491   -9999.000000   -9999.000000       0.038100       0.048000
56038     56038     sichuan        98.1000        32.9833          108       112     2012      11        20        325              0.098875      -0.133148       0.296782       0.159557   -9999.000000       0.055400       0.030100   -9999.000000
56038     56038     sichuan        98.1000        32.9833          108       112     2012      11        21        326              0.096083      -0.756592       0.317792       0.154617   -9999.000000   -9999.000000       0.028800       0.119000
56038     56038     sichuan        98.1000        32.9833          108       112     2012      11        22        327              0.098208       0.173645       0.000000       0.161611   -9999.000000   -9999.000000   -9999.000000   -9999.000000
56038     56038     sichuan        98.1000        32.9833          108       112     2012      11        23        328              0.090500      -0.527649       0.000000       0.155059   -9999.000000       0.144300   -9999.000000       0.114000
56038     56038     sichuan        98.1000        32.9833          108       112     2012      11        24        329              0.091500      -0.567291       0.265382       0.152556   -9999.000000   -9999.000000       0.036500   -9999.000000
56038     56038     sichuan        98.1000        32.9833          108       112     2012      11        25        330              0.086917      -0.817780       7.041382       0.146040   -9999.000000   -9999.000000       0.037100   -9999.000000
56038     56038     sichuan        98.1000        32.9833          108       112     2012      11        26        331              0.074625      -3.990295       0.299000       0.111488   -9999.000000   -9999.000000       0.028100       0.135000
56038     56038     sichuan        98.1000        32.9833          108       112     2012      11        27        332              0.073000      -4.122223       0.000000       0.108946   -9999.000000   -9999.000000   -9999.000000   -9999.000000
56038     56038     sichuan        98.1000        32.9833          108       112     2012      11        28        333              0.072667      -3.474609       0.000000       0.110699   -9999.000000   -9999.000000   -9999.000000       0.035000
56038     56038     sichuan        98.1000        32.9833          108       112     2012      11        29        334              0.072500      -2.613312       0.000000       0.121552   -9999.000000   -9999.000000   -9999.000000   -9999.000000
56038     56038     sichuan        98.1000        32.9833          108       112     2012      11        30        335              0.071542      -1.625122       1.940794       0.139477   -9999.000000   -9999.000000       0.032900   -9999.000000
56038     56038     sichuan        98.1000        32.9833          108       112     2012      12        01        336              0.066583      -2.155334       1.969906       0.132671   -9999.000000   -9999.000000       0.024200       0.065000
56038     56038     sichuan        98.1000        32.9833          108       112     2012      12        02        337              0.061375      -5.565033       3.450577       0.103902   -9999.000000   -9999.000000       0.028100   -9999.000000
56038     56038     sichuan        98.1000        32.9833          108       112     2012      12        03        338              0.059708      -5.046967       0.000000       0.108724   -9999.000000   -9999.000000   -9999.000000       0.021000
56038     56038     sichuan        98.1000        32.9833          108       112     2012      12        04        339              0.059375      -4.254364       0.653701       0.112980   -9999.000000   -9999.000000   -9999.000000   -9999.000000
56038     56038     sichuan        98.1000        32.9833          108       112     2012      12        05        340              0.057792      -5.225922       0.164387       0.109959   -9999.000000   -9999.000000       0.036800       0.053000
56038     56038     sichuan        98.1000        32.9833          108       112     2012      12        06        341              0.058708      -4.183929       0.459972       0.108815   -9999.000000   -9999.000000       0.041400       0.039000
56038     56038     sichuan        98.1000        32.9833          108       112     2012      12        07        342              0.058583      -4.787476       0.104737       0.112645   -9999.000000   -9999.000000       0.028900   -9999.000000
56038     56038     sichuan        98.1000        32.9833          108       112     2012      12        08        343              0.061583      -4.035828       0.283606       0.112700   -9999.000000   -9999.000000       0.021700       0.035000
56038     56038     sichuan        98.1000        32.9833          108       112     2012      12        09        344              0.063083      -2.610077       0.604930       0.128188   -9999.000000   -9999.000000   -9999.000000   -9999.000000
56038     56038     sichuan        98.1000        32.9833          108       112     2012      12        10        345              0.061500      -2.437225       0.360800       0.124818   -9999.000000   -9999.000000   -9999.000000       0.066000
56038     56038     sichuan        98.1000        32.9833          108       112     2012      12        11        346              0.057458      -5.489594       8.369404       0.104462   -9999.000000   -9999.000000       0.032200       0.029000
56038     56038     sichuan        98.1000        32.9833          108       112     2012      12        12        347              0.058375      -5.477814       1.176698       0.101151   -9999.000000   -9999.000000       0.024400   -9999.000000
56038     56038     sichuan        98.1000        32.9833          108       112     2012      12        13        348              0.059333      -4.006683       3.131972       0.107278   -9999.000000   -9999.000000       0.022100       0.034000
56038     56038     sichuan        98.1000        32.9833          108       112     2012      12        14        349              0.057958      -3.689972       0.000000       0.109148   -9999.000000   -9999.000000   -9999.000000   -9999.000000
56038     56038     sichuan        98.1000        32.9833          108       112     2012      12        15        350              0.000000      -4.988953       0.000000       0.105897   -9999.000000   -9999.000000   -9999.000000       0.116000
56038     56038     sichuan        98.1000        32.9833          108       112     2012      12        16        351              0.055792      -5.934052       0.000000       0.096908   -9999.000000   -9999.000000   -9999.000000   -9999.000000
56038     56038     sichuan        98.1000        32.9833          108       112     2012      12        17        352              0.056667      -4.307678       0.000000       0.105410   -9999.000000   -9999.000000       0.045200       0.001000
56038     56038     sichuan        98.1000        32.9833          108       112     2012      12        18        353              0.057708      -4.364746       0.000000       0.109291   -9999.000000   -9999.000000       0.029900       0.027000
56038     56038     sichuan        98.1000        32.9833          108       112     2012      12        19        354              0.060250      -3.306519       0.000000       0.115980   -9999.000000   -9999.000000       0.041900   -9999.000000
56038     56038     sichuan        98.1000        32.9833          108       112     2012      12        20        355              0.000000      -2.380707       0.000000       0.130271   -9999.000000   -9999.000000   -9999.000000       0.088000
56038     56038     sichuan        98.1000        32.9833          108       112     2012      12        21        356              0.055583      -4.590851       5.821585       0.106752   -9999.000000   -9999.000000   -9999.000000   -9999.000000
56038     56038     sichuan        98.1000        32.9833          108       112     2012      12        22        357              0.052667      -6.581421       0.000000       0.100415   -9999.000000   -9999.000000       0.041800       0.307000
56038     56038     sichuan        98.1000        32.9833          108       112     2012      12        23        358              0.052333      -7.665283       0.131118       0.089213   -9999.000000   -9999.000000       0.032800   -9999.000000
56038     56038     sichuan        98.1000        32.9833          108       112     2012      12        24        359              0.051000      -7.216705       0.298983       0.094387   -9999.000000   -9999.000000       0.023000   -9999.000000
56038     56038     sichuan        98.1000        32.9833          108       112     2012      12        25        360              0.051042      -6.704803       0.000000       0.102805   -9999.000000   -9999.000000   -9999.000000       0.075000
56038     56038     sichuan        98.1000        32.9833          108       112     2012      12        26        361              0.000000      -6.190460       0.000000       0.094528   -9999.000000   -9999.000000   -9999.000000   -9999.000000
56038     56038     sichuan        98.1000        32.9833          108       112     2012      12        27        362              0.049462      -8.481659       0.000000       0.089320   -9999.000000   -9999.000000   -9999.000000       0.011000
56038     56038     sichuan        98.1000        32.9833          108       112     2012      12        28        363              0.055000      -7.017670       0.127329       0.087347   -9999.000000   -9999.000000       0.039500   -9999.000000
56038     56038     sichuan        98.1000        32.9833          108       112     2012      12        29        364              0.000000      -5.331116       0.000000       0.101245   -9999.000000   -9999.000000       0.028700   -9999.000000
56038     56038     sichuan        98.1000        32.9833          108       112     2012      12        30        365              0.000000     -10.210754       0.000000       0.087401   -9999.000000   -9999.000000       0.025300       0.003000
56038     56038     sichuan        98.1000        32.9833          108       112     2012      12        31        366              0.049600     -10.651093       0.000000       0.085486   -9999.000000   -9999.000000   -9999.000000   -9999.000000
