# Supplementary material for: Research on Fusing Multisatellite Soil Moisture Data Based on Bayesian Model Averaging
Source: Hindawi journal article supplement (doi:10.1155/2018/9310838), 2018-06-25
Supplement: f1 [file 9310838.f1.zip › 2012_sm00-10cm_daily_ZDB_ZHY_56074_366days_allin.txt]

56074     56074     gansu          102.0700       34.0000          104       128     2012      01        01        001              0.000000   -9999.000000       0.000000   -9999.000000   -9999.000000   -9999.000000   -9999.000000   -9999.000000
56074     56074     gansu          102.0700       34.0000          104       128     2012      01        02        002              0.026167      -7.131256       0.000000       0.086622   -9999.000000   -9999.000000       0.039600   -9999.000000
56074     56074     gansu          102.0700       34.0000          104       128     2012      01        03        003              0.000000      -6.463562       1.791308       0.086299   -9999.000000   -9999.000000       0.018900       0.009000
56074     56074     gansu          102.0700       34.0000          104       128     2012      01        04        004              0.022667     -11.592468       0.000000       0.079488   -9999.000000   -9999.000000       0.037200   -9999.000000
56074     56074     gansu          102.0700       34.0000          104       128     2012      01        05        005              0.021917     -12.496307       2.218463       0.077679   -9999.000000   -9999.000000       0.021700       0.010000
56074     56074     gansu          102.0700       34.0000          104       128     2012      01        06        006              0.022136     -11.413879       0.000000       0.078069   -9999.000000   -9999.000000   -9999.000000   -9999.000000
56074     56074     gansu          102.0700       34.0000          104       128     2012      01        07        007              0.023739      -9.785980       0.000000       0.078545   -9999.000000   -9999.000000       0.022900   -9999.000000
56074     56074     gansu          102.0700       34.0000          104       128     2012      01        08        008              0.000000      -7.103699       0.000000       0.081173   -9999.000000   -9999.000000       0.036800       0.134000
56074     56074     gansu          102.0700       34.0000          104       128     2012      01        09        009              0.025708      -6.106445       0.000000       0.084640   -9999.000000   -9999.000000       0.034400   -9999.000000
56074     56074     gansu          102.0700       34.0000          104       128     2012      01        10        010              0.024792      -5.446411       0.000000       0.093748   -9999.000000   -9999.000000   -9999.000000       0.153000
56074     56074     gansu          102.0700       34.0000          104       128     2012      01        11        011              0.023913      -7.718109       0.000000       0.083393   -9999.000000   -9999.000000       0.019400   -9999.000000
56074     56074     gansu          102.0700       34.0000          104       128     2012      01        12        012              0.025250      -9.251129       0.000000       0.081488   -9999.000000   -9999.000000   -9999.000000   -9999.000000
56074     56074     gansu          102.0700       34.0000          104       128     2012      01        13        013              0.027292      -7.801819       0.000000       0.082135   -9999.000000   -9999.000000       0.023600       0.108000
56074     56074     gansu          102.0700       34.0000          104       128     2012      01        14        014              0.021625      -7.449677       0.000000       0.082955   -9999.000000   -9999.000000       0.031500   -9999.000000
56074     56074     gansu          102.0700       34.0000          104       128     2012      01        15        015              0.019609     -10.470306       0.000000       0.079806   -9999.000000   -9999.000000       0.038200       0.149000
56074     56074     gansu          102.0700       34.0000          104       128     2012      01        16        016              0.021292      -9.687958       0.000000       0.078700   -9999.000000   -9999.000000       0.017300   -9999.000000
56074     56074     gansu          102.0700       34.0000          104       128     2012      01        17        017              0.000000      -7.115356       0.000000       0.080499   -9999.000000   -9999.000000   -9999.000000       0.297000
56074     56074     gansu          102.0700       34.0000          104       128     2012      01        18        018              0.021625      -8.539246       0.000000       0.079643   -9999.000000   -9999.000000   -9999.000000       0.084000
56074     56074     gansu          102.0700       34.0000          104       128     2012      01        19        019              0.023542      -8.406036       0.000000       0.079886   -9999.000000   -9999.000000       0.024000   -9999.000000
56074     56074     gansu          102.0700       34.0000          104       128     2012      01        20        020              0.024250      -7.142456       0.000000       0.081696   -9999.000000   -9999.000000       0.011100       0.189000
56074     56074     gansu          102.0700       34.0000          104       128     2012      01        21        021              0.024292      -7.053802       0.000000       0.082192   -9999.000000   -9999.000000       0.025800   -9999.000000
56074     56074     gansu          102.0700       34.0000          104       128     2012      01        22        022              0.021826     -10.306152       0.000000       0.080277   -9999.000000   -9999.000000       0.015300       0.266000
56074     56074     gansu          102.0700       34.0000          104       128     2012      01        23        023              0.022696     -10.005615       0.000000       0.078807   -9999.000000   -9999.000000   -9999.000000       0.165000
56074     56074     gansu          102.0700       34.0000          104       128     2012      01        24        024              0.020833      -6.998016       0.000000       0.081325   -9999.000000   -9999.000000       0.012600       0.295000
56074     56074     gansu          102.0700       34.0000          104       128     2012      01        25        025              0.021000      -8.321198       0.000000       0.080740   -9999.000000   -9999.000000       0.027200       0.302000
56074     56074     gansu          102.0700       34.0000          104       128     2012      01        26        026              0.021833      -7.124542       0.000000       0.082748   -9999.000000   -9999.000000       0.010000   -9999.000000
56074     56074     gansu          102.0700       34.0000          104       128     2012      01        27        027              0.022625      -6.311188       0.000000       0.091896   -9999.000000   -9999.000000       0.038900       0.345000
56074     56074     gansu          102.0700       34.0000          104       128     2012      01        28        028              0.022917      -4.831238       0.000000       0.095654   -9999.000000   -9999.000000       0.015300   -9999.000000
56074     56074     gansu          102.0700       34.0000          104       128     2012      01        29        029              0.023042      -4.582916       0.000000       0.102490   -9999.000000   -9999.000000   -9999.000000       0.346000
56074     56074     gansu          102.0700       34.0000          104       128     2012      01        30        030              0.021833      -5.544769       0.000000       0.093777   -9999.000000   -9999.000000       0.023600       0.296000
56074     56074     gansu          102.0700       34.0000          104       128     2012      01        31        031              0.021667      -6.480865       0.000000       0.092102   -9999.000000   -9999.000000       0.010000   -9999.000000
56074     56074     gansu          102.0700       34.0000          104       128     2012      02        01        032              0.023083      -5.264984       0.000000       0.102523   -9999.000000   -9999.000000   -9999.000000       0.249000
56074     56074     gansu          102.0700       34.0000          104       128     2012      02        02        033              0.022900      -3.604767       0.000000       0.111070   -9999.000000   -9999.000000       0.017900   -9999.000000
56074     56074     gansu          102.0700       34.0000          104       128     2012      02        03        034              0.022562      -6.054077       0.000000       0.098565   -9999.000000   -9999.000000   -9999.000000       0.145000
56074     56074     gansu          102.0700       34.0000          104       128     2012      02        04        035              0.024313      -4.418488       0.000000       0.106441   -9999.000000   -9999.000000   -9999.000000   -9999.000000
56074     56074     gansu          102.0700       34.0000          104       128     2012      02        05        036              0.024609      -2.939514       0.000000       0.119861   -9999.000000   -9999.000000       0.029400   -9999.000000
56074     56074     gansu          102.0700       34.0000          104       128     2012      02        06        037              0.023478      -2.361603       0.000000       0.128170   -9999.000000   -9999.000000       0.012200       0.238000
56074     56074     gansu          102.0700       34.0000          104       128     2012      02        07        038              0.025250      -3.169891       0.000000       0.118460   -9999.000000   -9999.000000       0.045000   -9999.000000
56074     56074     gansu          102.0700       34.0000          104       128     2012      02        08        039              0.030458      -1.904358       0.000000       0.126557   -9999.000000   -9999.000000       0.037300       0.260000
56074     56074     gansu          102.0700       34.0000          104       128     2012      02        09        040              0.027500      -0.121979       0.000000       0.149674   -9999.000000   -9999.000000   -9999.000000   -9999.000000
56074     56074     gansu          102.0700       34.0000          104       128     2012      02        10        041              0.026167      -5.119232       0.000000       0.104079   -9999.000000   -9999.000000       0.018900   -9999.000000
56074     56074     gansu          102.0700       34.0000          104       128     2012      02        11        042              0.026125      -5.718658       0.000000       0.094979   -9999.000000   -9999.000000       0.033600       0.213000
56074     56074     gansu          102.0700       34.0000          104       128     2012      02        12        043              0.024583      -2.980255       0.000000       0.114848   -9999.000000   -9999.000000       0.040300   -9999.000000
56074     56074     gansu          102.0700       34.0000          104       128     2012      02        13        044              0.024625      -4.360199       0.000000       0.100899   -9999.000000   -9999.000000       0.025300       0.191000
56074     56074     gansu          102.0700       34.0000          104       128     2012      02        14        045              0.025250      -3.349884       0.000000       0.113325   -9999.000000   -9999.000000   -9999.000000   -9999.000000
56074     56074     gansu          102.0700       34.0000          104       128     2012      02        15        046              0.026708      -2.820526       0.000000       0.121984   -9999.000000   -9999.000000   -9999.000000       0.321000
56074     56074     gansu          102.0700       34.0000          104       128     2012      02        16        047              0.027174      -2.121094       0.000000       0.128911   -9999.000000   -9999.000000       0.030600       0.237000
56074     56074     gansu          102.0700       34.0000          104       128     2012      02        17        048              0.025917      -2.376343       0.000000       0.123058   -9999.000000   -9999.000000       0.014700   -9999.000000
56074     56074     gansu          102.0700       34.0000          104       128     2012      02        18        049              0.024583      -4.844482       0.000000       0.097600   -9999.000000   -9999.000000   -9999.000000       0.164000
56074     56074     gansu          102.0700       34.0000          104       128     2012      02        19        050              0.023875      -4.975189       0.000000       0.103560   -9999.000000   -9999.000000       0.028900   -9999.000000
56074     56074     gansu          102.0700       34.0000          104       128     2012      02        20        051              0.026167      -2.930573       0.000000       0.119152   -9999.000000   -9999.000000   -9999.000000       0.467000
56074     56074     gansu          102.0700       34.0000          104       128     2012      02        21        052              0.029625      -2.171204       0.000000       0.121761       0.103000   -9999.000000   -9999.000000       0.196000
56074     56074     gansu          102.0700       34.0000          104       128     2012      02        22        053              0.032708       0.192322       0.000000       0.151652       0.110000   -9999.000000       0.032500       0.456000
56074     56074     gansu          102.0700       34.0000          104       128     2012      02        23        054              0.033583       0.121399       0.000000       0.151811   -9999.000000   -9999.000000       0.021500       0.261000
56074     56074     gansu          102.0700       34.0000          104       128     2012      02        24        055              0.039542       1.457916       0.000000       0.166427   -9999.000000   -9999.000000       0.049600   -9999.000000
56074     56074     gansu          102.0700       34.0000          104       128     2012      02        25        056              0.041042       1.630554       0.000000       0.168704   -9999.000000   -9999.000000       0.039300       0.245000
56074     56074     gansu          102.0700       34.0000          104       128     2012      02        26        057              0.035750       0.987946       0.000000       0.162897   -9999.000000   -9999.000000   -9999.000000   -9999.000000
56074     56074     gansu          102.0700       34.0000          104       128     2012      02        27        058              0.035208      -1.153412       0.000000       0.142081   -9999.000000   -9999.000000       0.022500       0.473000
56074     56074     gansu          102.0700       34.0000          104       128     2012      02        28        059              0.042565      -0.912903       0.850007       0.137113   -9999.000000   -9999.000000   -9999.000000       0.203000
56074     56074     gansu          102.0700       34.0000          104       128     2012      02        29        060              0.000000   -9999.000000       5.796400   -9999.000000   -9999.000000   -9999.000000   -9999.000000   -9999.000000
56074     56074     gansu          102.0700       34.0000          104       128     2012      03        01        061              0.060000      -0.250366       0.000000       0.151512   -9999.000000   -9999.000000       0.032300       0.302000
56074     56074     gansu          102.0700       34.0000          104       128     2012      03        02        062              0.068000      -3.929840       0.000000       0.107555   -9999.000000   -9999.000000       0.033000   -9999.000000
56074     56074     gansu          102.0700       34.0000          104       128     2012      03        03        063              0.075250      -2.558685       0.000000       0.118732   -9999.000000   -9999.000000   -9999.000000       0.291000
56074     56074     gansu          102.0700       34.0000          104       128     2012      03        04        064              0.062125      -3.224426       0.000000       0.118045   -9999.000000   -9999.000000       0.036800   -9999.000000
56074     56074     gansu          102.0700       34.0000          104       128     2012      03        05        065              0.067261      -1.729980       0.824721       0.127088   -9999.000000   -9999.000000       0.024500   -9999.000000
56074     56074     gansu          102.0700       34.0000          104       128     2012      03        06        066              0.143957       0.217194       0.000000       0.151889   -9999.000000   -9999.000000       0.065600       0.459000
56074     56074     gansu          102.0700       34.0000          104       128     2012      03        07        067              0.000000      -0.666931       0.000000       0.145388   -9999.000000   -9999.000000       0.045800   -9999.000000
56074     56074     gansu          102.0700       34.0000          104       128     2012      03        08        068              0.214087      -1.044037       0.000000       0.139934   -9999.000000   -9999.000000   -9999.000000       0.364000
56074     56074     gansu          102.0700       34.0000          104       128     2012      03        09        069              0.206773      -3.977631       0.000000       0.101880   -9999.000000   -9999.000000   -9999.000000   -9999.000000
56074     56074     gansu          102.0700       34.0000          104       128     2012      03        10        070              0.220667      -4.386597       0.000000       0.101257   -9999.000000   -9999.000000       0.033400   -9999.000000
56074     56074     gansu          102.0700       34.0000          104       128     2012      03        11        071              0.238208      -3.163727       0.000000       0.109681   -9999.000000   -9999.000000       0.022300       0.506000
56074     56074     gansu          102.0700       34.0000          104       128     2012      03        12        072              0.252870      -0.868286       0.000000       0.137792   -9999.000000   -9999.000000       0.084900   -9999.000000
56074     56074     gansu          102.0700       34.0000          104       128     2012      03        13        073              0.272542      -0.109497       0.000000       0.150071   -9999.000000   -9999.000000       0.070600       0.571000
56074     56074     gansu          102.0700       34.0000          104       128     2012      03        14        074              0.319292       2.016144       0.000000       0.169450       0.141000   -9999.000000   -9999.000000   -9999.000000
56074     56074     gansu          102.0700       34.0000          104       128     2012      03        15        075              0.332522       2.614288       0.000000       0.183263       0.149000   -9999.000000       0.038500       0.776000
56074     56074     gansu          102.0700       34.0000          104       128     2012      03        16        076              0.332091       2.440094       0.137887       0.177729   -9999.000000   -9999.000000       0.039000       0.585000
56074     56074     gansu          102.0700       34.0000          104       128     2012      03        17        077              0.307542       0.087097       0.626070       0.154227   -9999.000000   -9999.000000       0.029400   -9999.000000
56074     56074     gansu          102.0700       34.0000          104       128     2012      03        18        078              0.302364       2.544434       0.000000       0.172122       0.159000   -9999.000000       0.078900       0.501000
56074     56074     gansu          102.0700       34.0000          104       128     2012      03        19        079              0.296250       3.412567       0.000000       0.177689       0.158000   -9999.000000   -9999.000000   -9999.000000
56074     56074     gansu          102.0700       34.0000          104       128     2012      03        20        080              0.296250       3.833740       0.000000       0.187315       0.164000   -9999.000000   -9999.000000       0.815000
56074     56074     gansu          102.0700       34.0000          104       128     2012      03        21        081              0.000000       6.025177       0.000000       0.200763   -9999.000000   -9999.000000       0.048900       0.708000
56074     56074     gansu          102.0700       34.0000          104       128     2012      03        22        082              0.000000       5.829468       0.000000       0.199419   -9999.000000   -9999.000000       0.032600       0.544000
56074     56074     gansu          102.0700       34.0000          104       128     2012      03        23        083              0.284667       0.167175       0.000000       0.155826       0.137000   -9999.000000       0.097600       0.564000
56074     56074     gansu          102.0700       34.0000          104       128     2012      03        24        084              0.281542       1.333588       0.000000       0.158624       0.161000   -9999.000000       0.085800   -9999.000000
56074     56074     gansu          102.0700       34.0000          104       128     2012      03        25        085              0.000000       2.579956       0.073680       0.168434       0.166000   -9999.000000   -9999.000000       0.527000
56074     56074     gansu          102.0700       34.0000          104       128     2012      03        26        086              0.280042       2.932190       0.000000       0.168045   -9999.000000   -9999.000000   -9999.000000   -9999.000000
56074     56074     gansu          102.0700       34.0000          104       128     2012      03        27        087              0.282083       4.120239       0.083040       0.181346   -9999.000000   -9999.000000       0.049400       0.780000
56074     56074     gansu          102.0700       34.0000          104       128     2012      03        28        088              0.299417       4.941223       0.234813       0.193745       0.140000   -9999.000000       0.040900       0.750000
56074     56074     gansu          102.0700       34.0000          104       128     2012      03        29        089              0.300375       3.649139       0.000000       0.191252       0.144000   -9999.000000       0.080000   -9999.000000
56074     56074     gansu          102.0700       34.0000          104       128     2012      03        30        090              0.299083       3.209381       0.847242       0.181455   -9999.000000   -9999.000000       0.065300       0.549000
56074     56074     gansu          102.0700       34.0000          104       128     2012      03        31        091              0.294583       0.511932       0.000000       0.152332       0.156000   -9999.000000   -9999.000000   -9999.000000
56074     56074     gansu          102.0700       34.0000          104       128     2012      04        01        092              0.292667       2.908325       0.182136       0.169444   -9999.000000   -9999.000000       0.052300       0.624000
56074     56074     gansu          102.0700       34.0000          104       128     2012      04        02        093              0.290167       3.619873       0.366534       0.189329   -9999.000000   -9999.000000       0.050200   -9999.000000
56074     56074     gansu          102.0700       34.0000          104       128     2012      04        03        094              0.290958       6.964355       1.314762       0.194778       0.163000   -9999.000000       0.042100   -9999.000000
56074     56074     gansu          102.0700       34.0000          104       128     2012      04        04        095              0.291333       7.485474       0.000000       0.203685       0.159000   -9999.000000       0.094100       0.798000
56074     56074     gansu          102.0700       34.0000          104       128     2012      04        05        096              0.290542       6.572906       0.000000       0.208816       0.148000   -9999.000000   -9999.000000   -9999.000000
56074     56074     gansu          102.0700       34.0000          104       128     2012      04        06        097              0.290292       4.424622       5.763649       0.191640   -9999.000000   -9999.000000   -9999.000000       0.658000
56074     56074     gansu          102.0700       34.0000          104       128     2012      04        07        098              0.289208       3.605408       0.000000       0.186585   -9999.000000   -9999.000000       0.048900   -9999.000000
56074     56074     gansu          102.0700       34.0000          104       128     2012      04        08        099              0.288417       3.915466       0.050227       0.187437       0.143000   -9999.000000       0.046500   -9999.000000
56074     56074     gansu          102.0700       34.0000          104       128     2012      04        09        100              0.300083       4.881683       0.168608       0.191574       0.122000   -9999.000000       0.085200       0.758000
56074     56074     gansu          102.0700       34.0000          104       128     2012      04        10        101              0.294792       2.873108       0.000000       0.179244       0.156000   -9999.000000       0.083000   -9999.000000
56074     56074     gansu          102.0700       34.0000          104       128     2012      04        11        102              0.295833       5.411987       0.065003       0.194921   -9999.000000       0.170500   -9999.000000       0.815000
56074     56074     gansu          102.0700       34.0000          104       128     2012      04        12        103              0.293208       6.630554       0.221198       0.201942   -9999.000000   -9999.000000       0.043000   -9999.000000
56074     56074     gansu          102.0700       34.0000          104       128     2012      04        13        104              0.294625       4.728607       0.948596       0.192865       0.118000   -9999.000000       0.046000       0.626000
56074     56074     gansu          102.0700       34.0000          104       128     2012      04        14        105              0.294375       3.239685       0.057096       0.191439       0.149000   -9999.000000       0.045400       0.768000
56074     56074     gansu          102.0700       34.0000          104       128     2012      04        15        106              0.295625       6.531281       0.165595       0.202451       0.151000   -9999.000000       0.062700   -9999.000000
56074     56074     gansu          102.0700       34.0000          104       128     2012      04        16        107              0.306917       4.518799       4.780456       0.200364   -9999.000000   -9999.000000       0.062900       0.592000
56074     56074     gansu          102.0700       34.0000          104       128     2012      04        17        108              0.304583       1.540100       0.000000       0.175941   -9999.000000   -9999.000000   -9999.000000   -9999.000000
56074     56074     gansu          102.0700       34.0000          104       128     2012      04        18        109              0.297917       2.347076       0.148341       0.172138       0.144000       0.088800   -9999.000000       0.714000
56074     56074     gansu          102.0700       34.0000          104       128     2012      04        19        110              0.293417       4.782532       2.007469       0.191557       0.142000   -9999.000000       0.045400       0.710000
56074     56074     gansu          102.0700       34.0000          104       128     2012      04        20        111              0.289208       4.498352       1.671084       0.189391       0.146000   -9999.000000       0.040700       0.750000
56074     56074     gansu          102.0700       34.0000          104       128     2012      04        21        112              0.286042       4.651825       0.279195       0.195609       0.139000       0.113800       0.082100       0.629000
56074     56074     gansu          102.0700       34.0000          104       128     2012      04        22        113              0.283000       5.896179       0.412294       0.197782   -9999.000000   -9999.000000   -9999.000000   -9999.000000
56074     56074     gansu          102.0700       34.0000          104       128     2012      04        23        114              0.292417       9.505585       1.254747       0.211679   -9999.000000   -9999.000000   -9999.000000       0.740000
56074     56074     gansu          102.0700       34.0000          104       128     2012      04        24        115              0.284542       7.181946       0.660864       0.221000       0.134000       0.238200       0.064100   -9999.000000
56074     56074     gansu          102.0700       34.0000          104       128     2012      04        25        116              0.000000       6.744781       0.162891       0.203916       0.144000       0.373800       0.056800       0.824000
56074     56074     gansu          102.0700       34.0000          104       128     2012      04        26        117              0.270708       6.712860       2.426743       0.197997       0.141000       0.238300       0.101500       0.594000
56074     56074     gansu          102.0700       34.0000          104       128     2012      04        27        118              0.264875       6.430664       0.412378       0.193219   -9999.000000   -9999.000000       0.092100   -9999.000000
56074     56074     gansu          102.0700       34.0000          104       128     2012      04        28        119              0.260333       8.175049       0.216235       0.212299   -9999.000000       0.554800   -9999.000000       0.658000
56074     56074     gansu          102.0700       34.0000          104       128     2012      04        29        120              0.256609       8.866974       0.369604       0.214111       0.121000       0.318800       0.075900   -9999.000000
56074     56074     gansu          102.0700       34.0000          104       128     2012      04        30        121              0.254500       8.972473       0.000000       0.216572       0.119000   -9999.000000       0.070600       0.648000
56074     56074     gansu          102.0700       34.0000          104       128     2012      05        01        122              0.251000       6.404572       0.404205       0.213016       0.158000       0.296200       0.064800   -9999.000000
56074     56074     gansu          102.0700       34.0000          104       128     2012      05        02        123              0.277625       6.156555       7.928022       0.212088   -9999.000000   -9999.000000       0.098400   -9999.000000
56074     56074     gansu          102.0700       34.0000          104       128     2012      05        03        124              0.297750       6.337433       7.245341       0.231916   -9999.000000   -9999.000000       0.090100       0.739000
56074     56074     gansu          102.0700       34.0000          104       128     2012      05        04        125              0.301042       5.088104       1.786086       0.278379       0.158000   -9999.000000   -9999.000000   -9999.000000
56074     56074     gansu          102.0700       34.0000          104       128     2012      05        05        126              0.302083       7.431366       1.471544       0.264813       0.153000   -9999.000000       0.083700       0.723000
56074     56074     gansu          102.0700       34.0000          104       128     2012      05        06        127              0.295958       8.031830       2.892681       0.265767       0.168000   -9999.000000       0.087700   -9999.000000
56074     56074     gansu          102.0700       34.0000          104       128     2012      05        07        128              0.299750       9.947266       0.693456       0.261592   -9999.000000   -9999.000000       0.103800   -9999.000000
56074     56074     gansu          102.0700       34.0000          104       128     2012      05        08        129              0.295167       9.984955       0.717289       0.261412   -9999.000000   -9999.000000       0.093900       0.710000
56074     56074     gansu          102.0700       34.0000          104       128     2012      05        09        130              0.284208       7.424011       0.302114       0.257809       0.158000       0.500800   -9999.000000   -9999.000000
56074     56074     gansu          102.0700       34.0000          104       128     2012      05        10        131              0.270750      12.223999       1.632369       0.249053       0.143000   -9999.000000   -9999.000000       0.719000
56074     56074     gansu          102.0700       34.0000          104       128     2012      05        11        132              0.258292      12.111511       1.232301       0.248957       0.155000       0.348700       0.081900   -9999.000000
56074     56074     gansu          102.0700       34.0000          104       128     2012      05        12        133              0.250000      10.995422       0.299890       0.248427       0.167000       0.403500       0.072500       0.785000
56074     56074     gansu          102.0700       34.0000          104       128     2012      05        13        134              0.246292      10.036682       1.744297       0.244455   -9999.000000   -9999.000000       0.092300       0.619000
56074     56074     gansu          102.0700       34.0000          104       128     2012      05        14        135              0.254000       5.304962       0.432356       0.247484   -9999.000000       0.233100       0.081100   -9999.000000
56074     56074     gansu          102.0700       34.0000          104       128     2012      05        15        136              0.256250       6.279114       0.258180       0.245507       0.151000   -9999.000000   -9999.000000       0.621000
56074     56074     gansu          102.0700       34.0000          104       128     2012      05        16        137              0.245042       9.311554       0.717281       0.243722   -9999.000000   -9999.000000       0.072800   -9999.000000
56074     56074     gansu          102.0700       34.0000          104       128     2012      05        17        138              0.246792       7.387329       0.183576       0.243447       0.142000   -9999.000000       0.074400       0.504000
56074     56074     gansu          102.0700       34.0000          104       128     2012      05        18        139              0.239708       6.137817       0.000000       0.243992   -9999.000000   -9999.000000       0.068100       0.633000
56074     56074     gansu          102.0700       34.0000          104       128     2012      05        19        140              0.224917      10.465790       0.308535       0.236414       0.107000       0.389300       0.085000       0.835000
56074     56074     gansu          102.0700       34.0000          104       128     2012      05        20        141              0.238875      14.659454       1.722395       0.229533   -9999.000000   -9999.000000       0.080200       0.570000
56074     56074     gansu          102.0700       34.0000          104       128     2012      05        21        142              0.269208      15.391602      16.379847       0.233154       0.187000       0.240400   -9999.000000   -9999.000000
56074     56074     gansu          102.0700       34.0000          104       128     2012      05        22        143              0.301917       9.776520       2.180018       0.262406       0.197000   -9999.000000       0.117700       0.723000
56074     56074     gansu          102.0700       34.0000          104       128     2012      05        23        144              0.315083       7.742371      13.327945       0.295723   -9999.000000   -9999.000000       0.110000   -9999.000000
56074     56074     gansu          102.0700       34.0000          104       128     2012      05        24        145              0.336167       9.870789       7.842190       0.289083   -9999.000000   -9999.000000       0.146300       0.689000
56074     56074     gansu          102.0700       34.0000          104       128     2012      05        25        146              0.000000       6.480469       0.796573       0.304484       0.212000   -9999.000000       0.141100       0.803000
56074     56074     gansu          102.0700       34.0000          104       128     2012      05        26        147              0.318458       7.557373       3.366224       0.293501       0.187000   -9999.000000   -9999.000000   -9999.000000
56074     56074     gansu          102.0700       34.0000          104       128     2012      05        27        148              0.314583      12.037231       5.819909       0.282521       0.175000   -9999.000000   -9999.000000       0.697000
56074     56074     gansu          102.0700       34.0000          104       128     2012      05        28        149              0.318417      12.109467       0.960542       0.285841       0.191000   -9999.000000   -9999.000000   -9999.000000
56074     56074     gansu          102.0700       34.0000          104       128     2012      05        29        150              0.309000       8.998230       0.000000       0.284103       0.158000       0.416700       0.098000       0.868000
56074     56074     gansu          102.0700       34.0000          104       128     2012      05        30        151              0.303625      11.826019       7.163855       0.269941   -9999.000000       0.338800       0.118000   -9999.000000
56074     56074     gansu          102.0700       34.0000          104       128     2012      05        31        152              0.336792      13.084961       6.447103       0.273268   -9999.000000       0.150300       0.109500   -9999.000000
56074     56074     gansu          102.0700       34.0000          104       128     2012      06        01        153              0.322833       6.748627       0.340119       0.296226       0.221000       0.211000   -9999.000000       0.744000
56074     56074     gansu          102.0700       34.0000          104       128     2012      06        02        154              0.322000      11.153412       5.652451       0.276625       0.222000   -9999.000000       0.106000   -9999.000000
56074     56074     gansu          102.0700       34.0000          104       128     2012      06        03        155              0.322375       8.904877       0.457839       0.284660       0.214000       0.372900   -9999.000000       0.779000
56074     56074     gansu          102.0700       34.0000          104       128     2012      06        04        156              0.327208       7.583191       9.136438       0.278408   -9999.000000       0.350300       0.104400   -9999.000000
56074     56074     gansu          102.0700       34.0000          104       128     2012      06        05        157              0.330125       7.013367       0.051963       0.285312       0.228000   -9999.000000       0.125300   -9999.000000
56074     56074     gansu          102.0700       34.0000          104       128     2012      06        06        158              0.321667      10.365143       0.505886       0.287737       0.210000       0.265500       0.104800       0.725000
56074     56074     gansu          102.0700       34.0000          104       128     2012      06        07        159              0.308583      10.067017       3.047538       0.275242       0.215000   -9999.000000   -9999.000000   -9999.000000
56074     56074     gansu          102.0700       34.0000          104       128     2012      06        08        160              0.330292      12.611786       5.472089       0.269767   -9999.000000       0.313900       0.101900       0.775000
56074     56074     gansu          102.0700       34.0000          104       128     2012      06        09        161              0.326375       8.183258       5.949819       0.289136       0.187000       0.531700       0.098600   -9999.000000
56074     56074     gansu          102.0700       34.0000          104       128     2012      06        10        162              0.332708      10.288879       1.546802       0.285961       0.200500       0.346400       0.119600       0.704000
56074     56074     gansu          102.0700       34.0000          104       128     2012      06        11        163              0.000000       8.610352       2.553876       0.284610       0.234000       0.425100       0.141100       0.822000
56074     56074     gansu          102.0700       34.0000          104       128     2012      06        12        164              0.315167       8.412567       2.965326       0.280397       0.255000   -9999.000000   -9999.000000   -9999.000000
56074     56074     gansu          102.0700       34.0000          104       128     2012      06        13        165              0.312750      10.996674       1.927356       0.278697   -9999.000000       0.382500   -9999.000000       0.794000
56074     56074     gansu          102.0700       34.0000          104       128     2012      06        14        166              0.306500       8.790955       1.563655       0.280011       0.246000       0.270300       0.130800   -9999.000000
56074     56074     gansu          102.0700       34.0000          104       128     2012      06        15        167              0.320750      11.126282       7.985009       0.273953   -9999.000000   -9999.000000       0.130300       0.623000
56074     56074     gansu          102.0700       34.0000          104       128     2012      06        16        168              0.345333       8.355774       2.415501       0.291434       0.251500       0.394000       0.151800       0.716000
56074     56074     gansu          102.0700       34.0000          104       128     2012      06        17        169              0.355750       9.884735       0.805879       0.281928       0.226000       0.290800       0.135700       0.803000
56074     56074     gansu          102.0700       34.0000          104       128     2012      06        18        170              0.347478      11.110168       0.457557       0.276669       0.224000       0.219800   -9999.000000       0.701000
56074     56074     gansu          102.0700       34.0000          104       128     2012      06        19        171              0.338333      12.333496       0.165976       0.269103       0.213000       0.360400       0.100500   -9999.000000
56074     56074     gansu          102.0700       34.0000          104       128     2012      06        20        172              0.331000      13.322968       6.463136       0.261354       0.224000   -9999.000000       0.102900       0.776000
56074     56074     gansu          102.0700       34.0000          104       128     2012      06        21        173              0.324708      11.639313       0.541457       0.279749       0.293500   -9999.000000       0.102100   -9999.000000
56074     56074     gansu          102.0700       34.0000          104       128     2012      06        22        174              0.316333      11.318817       0.514801       0.269379       0.284000       0.192300       0.107400       0.773000
56074     56074     gansu          102.0700       34.0000          104       128     2012      06        23        175              0.300083      12.532166       0.584962       0.263269   -9999.000000   -9999.000000   -9999.000000       0.669000
56074     56074     gansu          102.0700       34.0000          104       128     2012      06        24        176              0.313208      13.863464       7.810731       0.258743       0.304000       0.188500   -9999.000000   -9999.000000
56074     56074     gansu          102.0700       34.0000          104       128     2012      06        25        177              0.317917      10.148102       0.731386       0.278509       0.297000   -9999.000000       0.092100       0.715000
56074     56074     gansu          102.0700       34.0000          104       128     2012      06        26        178              0.336125      12.142303      17.979858       0.273134       0.288500       0.269500       0.092500   -9999.000000
56074     56074     gansu          102.0700       34.0000          104       128     2012      06        27        179              0.363958      12.102020       5.640043       0.297411       0.346000       0.259400       0.101500       0.849000
56074     56074     gansu          102.0700       34.0000          104       128     2012      06        28        180              0.385708      12.508636      19.155434       0.300008   -9999.000000       0.240500       0.090700   -9999.000000
56074     56074     gansu          102.0700       34.0000          104       128     2012      06        29        181              0.358417      12.139435       0.000000       0.317186   -9999.000000       0.340500   -9999.000000   -9999.000000
56074     56074     gansu          102.0700       34.0000          104       128     2012      06        30        182              0.344042      12.385254       2.644300       0.292767       0.291000   -9999.000000   -9999.000000   -9999.000000
56074     56074     gansu          102.0700       34.0000          104       128     2012      07        01        183              0.366917      14.367035      36.215294       0.286035       0.472000       0.238100       0.093600   -9999.000000
56074     56074     gansu          102.0700       34.0000          104       128     2012      07        02        184              0.383083      14.948761      11.497984       0.316024       0.494000       0.357100       0.084100       0.735000
56074     56074     gansu          102.0700       34.0000          104       128     2012      07        03        185              0.376250      14.632904      12.528537       0.315786   -9999.000000   -9999.000000       0.087300   -9999.000000
56074     56074     gansu          102.0700       34.0000          104       128     2012      07        04        186              0.361833      11.066742       0.440427       0.314729   -9999.000000       0.395700       0.087600   -9999.000000
56074     56074     gansu          102.0700       34.0000          104       128     2012      07        05        187              0.348250      11.723389       1.412399       0.294971   -9999.000000       0.383700   -9999.000000       0.716000
56074     56074     gansu          102.0700       34.0000          104       128     2012      07        06        188              0.345625      14.341064       0.125853       0.283340   -9999.000000       0.193800       0.080700   -9999.000000
56074     56074     gansu          102.0700       34.0000          104       128     2012      07        07        189              0.345542      13.199982      10.464535       0.279599   -9999.000000       0.335200       0.093200       0.843000
56074     56074     gansu          102.0700       34.0000          104       128     2012      07        08        190              0.352875      13.942993       2.022393       0.290303       0.491000   -9999.000000       0.077000   -9999.000000
56074     56074     gansu          102.0700       34.0000          104       128     2012      07        09        191              0.362292      12.970673       7.446907       0.291927       0.484000       0.475000       0.117200       0.825000
56074     56074     gansu          102.0700       34.0000          104       128     2012      07        10        192              0.344583      12.442932       0.477492       0.298949       0.475000       0.240400   -9999.000000       0.693000
56074     56074     gansu          102.0700       34.0000          104       128     2012      07        11        193              0.367042      14.353394      12.781784       0.282213       0.465000   -9999.000000   -9999.000000   -9999.000000
56074     56074     gansu          102.0700       34.0000          104       128     2012      07        12        194              0.363958       9.833344       5.498782       0.305696       0.461000       0.197500       0.112000       0.778000
56074     56074     gansu          102.0700       34.0000          104       128     2012      07        13        195              0.353875      10.568237       0.372614       0.296502       0.447000   -9999.000000       0.104700   -9999.000000
56074     56074     gansu          102.0700       34.0000          104       128     2012      07        14        196              0.360042      14.050568       5.763338       0.284027       0.448000       0.397400       0.116000       0.543000
56074     56074     gansu          102.0700       34.0000          104       128     2012      07        15        197              0.350875      10.804413       0.238798       0.293582   -9999.000000       0.297200       0.111100       0.773000
56074     56074     gansu          102.0700       34.0000          104       128     2012      07        16        198              0.373083      12.344360      24.280952       0.281830       0.491000       0.224700   -9999.000000   -9999.000000
56074     56074     gansu          102.0700       34.0000          104       128     2012      07        17        199              0.385167      13.781891       6.015886       0.307222       0.479000       0.170800       0.142800       0.777000
56074     56074     gansu          102.0700       34.0000          104       128     2012      07        18        200              0.391208      13.458008      18.924006       0.308944       0.484000   -9999.000000       0.145400   -9999.000000
56074     56074     gansu          102.0700       34.0000          104       128     2012      07        19        201              0.369542      13.289093       4.695876       0.314133   -9999.000000       0.168800       0.141700       0.735000
56074     56074     gansu          102.0700       34.0000          104       128     2012      07        20        202              0.387000      14.129547      28.245388       0.304988       0.453000       0.309900       0.113800   -9999.000000
56074     56074     gansu          102.0700       34.0000          104       128     2012      07        21        203              0.372818      13.891418       1.053156       0.321116   -9999.000000   -9999.000000       0.153700       0.620000
56074     56074     gansu          102.0700       34.0000          104       128     2012      07        22        204              0.358958      11.635101       1.297386       0.302204   -9999.000000       0.488000   -9999.000000       0.763000
56074     56074     gansu          102.0700       34.0000          104       128     2012      07        23        205              0.356833      12.462860       5.172284       0.292578   -9999.000000       0.188000       0.160600   -9999.000000
56074     56074     gansu          102.0700       34.0000          104       128     2012      07        24        206              0.358000      12.003845       4.424663       0.297662   -9999.000000       0.282200       0.161800       0.666000
56074     56074     gansu          102.0700       34.0000          104       128     2012      07        25        207              0.343750      11.937805       0.661402       0.297170   -9999.000000       0.290200       0.181700   -9999.000000
56074     56074     gansu          102.0700       34.0000          104       128     2012      07        26        208              0.359667      15.059387      10.719549       0.285429   -9999.000000   -9999.000000       0.174100       0.859000
56074     56074     gansu          102.0700       34.0000          104       128     2012      07        27        209              0.372833      15.031525       0.098270       0.297524   -9999.000000       0.240400   -9999.000000   -9999.000000
56074     56074     gansu          102.0700       34.0000          104       128     2012      07        28        210              0.357750      14.039886       6.516077       0.292979   -9999.000000       0.190100   -9999.000000   -9999.000000
56074     56074     gansu          102.0700       34.0000          104       128     2012      07        29        211              0.344500      15.131165       1.093496       0.297333   -9999.000000   -9999.000000       0.162000       0.784000
56074     56074     gansu          102.0700       34.0000          104       128     2012      07        30        212              0.360208      16.800262      14.974382       0.284322   -9999.000000       0.307800       0.112500   -9999.000000
56074     56074     gansu          102.0700       34.0000          104       128     2012      07        31        213              0.389750      14.322968      11.422317       0.305827   -9999.000000   -9999.000000       0.117900       0.808000
56074     56074     gansu          102.0700       34.0000          104       128     2012      08        01        214              0.373958      10.984283       3.280392       0.312412   -9999.000000       0.230600       0.114200   -9999.000000
56074     56074     gansu          102.0700       34.0000          104       128     2012      08        02        215              0.362375      13.491821       0.438119       0.297504   -9999.000000       0.285500   -9999.000000   -9999.000000
56074     56074     gansu          102.0700       34.0000          104       128     2012      08        03        216              0.365167      14.125092       3.548761       0.287694   -9999.000000       0.301400       0.110200       0.840000
56074     56074     gansu          102.0700       34.0000          104       128     2012      08        04        217              0.369250      13.312866       5.300385       0.289979   -9999.000000       0.515300       0.115700   -9999.000000
56074     56074     gansu          102.0700       34.0000          104       128     2012      08        05        218              0.362125      14.389771       0.560103       0.294138   -9999.000000   -9999.000000       0.110600       0.749000
56074     56074     gansu          102.0700       34.0000          104       128     2012      08        06        219              0.352375      14.898682       1.030848       0.285361   -9999.000000       0.425000       0.123100   -9999.000000
56074     56074     gansu          102.0700       34.0000          104       128     2012      08        07        220              0.345458      15.748352       0.000000       0.280592   -9999.000000       0.327900       0.128200       0.686000
56074     56074     gansu          102.0700       34.0000          104       128     2012      08        08        221              0.326000      16.163422       0.000000       0.276495   -9999.000000       0.421800   -9999.000000       0.745000
56074     56074     gansu          102.0700       34.0000          104       128     2012      08        09        222              0.305292      16.214142       0.000000       0.272806   -9999.000000       0.469300       0.115200   -9999.000000
56074     56074     gansu          102.0700       34.0000          104       128     2012      08        10        223              0.282417      16.576752       0.436721       0.270133   -9999.000000       0.229500   -9999.000000       0.567000
56074     56074     gansu          102.0700       34.0000          104       128     2012      08        11        224              0.262958      17.570068       0.537697       0.268562   -9999.000000       0.210500       0.118700   -9999.000000
56074     56074     gansu          102.0700       34.0000          104       128     2012      08        12        225              0.250250      17.774261      11.854715       0.268412       0.500000       0.240200       0.106300       0.586000
56074     56074     gansu          102.0700       34.0000          104       128     2012      08        13        226              0.335958      17.544830      28.695778       0.278129       0.500000   -9999.000000   -9999.000000       0.879000
56074     56074     gansu          102.0700       34.0000          104       128     2012      08        14        227              0.351958      15.724487       1.691184       0.325247       0.500000       0.239300   -9999.000000       0.813000
56074     56074     gansu          102.0700       34.0000          104       128     2012      08        15        228              0.338250      15.004425      15.136581       0.299027       0.500000       0.184500       0.151900       0.695000
56074     56074     gansu          102.0700       34.0000          104       128     2012      08        16        229              0.355583      16.938446      12.399879       0.298002   -9999.000000   -9999.000000       0.153600   -9999.000000
56074     56074     gansu          102.0700       34.0000          104       128     2012      08        17        230              0.366792      15.784729      14.631018       0.313772   -9999.000000   -9999.000000       0.157700       0.858000
56074     56074     gansu          102.0700       34.0000          104       128     2012      08        18        231              0.375625      13.053589       3.580108       0.314179   -9999.000000   -9999.000000       0.160300   -9999.000000
56074     56074     gansu          102.0700       34.0000          104       128     2012      08        19        232              0.353625      11.754425       0.726633       0.305378       0.500000       0.476400   -9999.000000       0.820000
56074     56074     gansu          102.0700       34.0000          104       128     2012      08        20        233              0.339542      13.210541       0.160442       0.292195       0.500000       0.209300       0.104000       0.711000
56074     56074     gansu          102.0700       34.0000          104       128     2012      08        21        234              0.340250      13.513519       4.381685       0.285758       0.500000       0.226600       0.107500   -9999.000000
56074     56074     gansu          102.0700       34.0000          104       128     2012      08        22        235              0.332292      10.670685       0.401714       0.293810   -9999.000000       0.295800       0.103400   -9999.000000
56074     56074     gansu          102.0700       34.0000          104       128     2012      08        23        236              0.322250      11.759766       2.999135       0.284239   -9999.000000   -9999.000000       0.110100   -9999.000000
56074     56074     gansu          102.0700       34.0000          104       128     2012      08        24        237              0.357250      12.637238       8.501815       0.283573   -9999.000000       0.381000   -9999.000000   -9999.000000
56074     56074     gansu          102.0700       34.0000          104       128     2012      08        25        238              0.000000      11.505859       2.848015       0.302508   -9999.000000   -9999.000000   -9999.000000   -9999.000000
56074     56074     gansu          102.0700       34.0000          104       128     2012      08        26        239              0.335917      11.521729       0.231761       0.292087       0.500000       0.288800       0.107800   -9999.000000
56074     56074     gansu          102.0700       34.0000          104       128     2012      08        27        240              0.340792      13.562866       7.914654       0.280806   -9999.000000       0.555500       0.129400       0.645000
56074     56074     gansu          102.0700       34.0000          104       128     2012      08        28        241              0.328958       9.343567       0.000000       0.297841   -9999.000000       0.366400       0.149400   -9999.000000
56074     56074     gansu          102.0700       34.0000          104       128     2012      08        29        242              0.322542      12.482635       0.897154       0.283229   -9999.000000       0.251500       0.133600       0.707000
56074     56074     gansu          102.0700       34.0000          104       128     2012      08        30        243              0.317208      11.711731       0.942134       0.281544   -9999.000000       0.261200   -9999.000000   -9999.000000
56074     56074     gansu          102.0700       34.0000          104       128     2012      08        31        244              0.340750      12.663025      25.097227       0.279309       0.500000   -9999.000000   -9999.000000   -9999.000000
56074     56074     gansu          102.0700       34.0000          104       128     2012      09        01        245              0.360167      10.858307       1.295938       0.297440       0.500000       0.369100       0.138500       0.788000
56074     56074     gansu          102.0700       34.0000          104       128     2012      09        02        246              0.337500       8.550232       0.676213       0.312522   -9999.000000       0.275600       0.130100   -9999.000000
56074     56074     gansu          102.0700       34.0000          104       128     2012      09        03        247              0.319500      10.723938       0.000000       0.291184   -9999.000000       0.293800       0.173800       0.639000
56074     56074     gansu          102.0700       34.0000          104       128     2012      09        04        248              0.302667      11.468292       0.000000       0.281232       0.500000       0.406600       0.161400   -9999.000000
56074     56074     gansu          102.0700       34.0000          104       128     2012      09        05        249              0.285042      12.157379       0.334493       0.276038       0.496000   -9999.000000   -9999.000000       0.820000
56074     56074     gansu          102.0700       34.0000          104       128     2012      09        06        250              0.272083      13.431976       0.927560       0.272404   -9999.000000       0.361600       0.152300       0.690000
56074     56074     gansu          102.0700       34.0000          104       128     2012      09        07        251              0.270708      13.806885       2.712313       0.273634   -9999.000000       0.307700       0.157900   -9999.000000
56074     56074     gansu          102.0700       34.0000          104       128     2012      09        08        252              0.272875      11.968719       0.000000       0.277976       0.500000       0.245800       0.155300       0.728000
56074     56074     gansu          102.0700       34.0000          104       128     2012      09        09        253              0.267458      13.305298       0.986405       0.275427       0.500000       0.259100       0.156200   -9999.000000
56074     56074     gansu          102.0700       34.0000          104       128     2012      09        10        254              0.263375      12.762115       0.329515       0.275761       0.500000   -9999.000000   -9999.000000       0.655000
56074     56074     gansu          102.0700       34.0000          104       128     2012      09        11        255              0.255417      12.053833       0.754473       0.273503       0.318000       0.367700   -9999.000000       0.664000
56074     56074     gansu          102.0700       34.0000          104       128     2012      09        12        256              0.242292      12.104156       0.000000       0.271534       0.312000       0.275800       0.148900       0.716000
56074     56074     gansu          102.0700       34.0000          104       128     2012      09        13        257              0.233708      10.422180       0.000000       0.268679   -9999.000000       0.171900       0.150200       0.394000
56074     56074     gansu          102.0700       34.0000          104       128     2012      09        14        258              0.225667       9.603424       0.000000       0.266449   -9999.000000       0.299700       0.169100   -9999.000000
56074     56074     gansu          102.0700       34.0000          104       128     2012      09        15        259              0.221083      10.825836       1.216912       0.265174       0.316000       0.181600       0.164000       0.736000
56074     56074     gansu          102.0700       34.0000          104       128     2012      09        16        260              0.220875      10.492981       0.107665       0.267360       0.305000   -9999.000000   -9999.000000   -9999.000000
56074     56074     gansu          102.0700       34.0000          104       128     2012      09        17        261              0.217500       8.028137       1.867546       0.269983       0.308000       0.333800       0.198700       0.713000
56074     56074     gansu          102.0700       34.0000          104       128     2012      09        18        262              0.220000      10.691284       0.048749       0.269402   -9999.000000   -9999.000000       0.198000       0.563000
56074     56074     gansu          102.0700       34.0000          104       128     2012      09        19        263              0.217333      10.853302       0.282514       0.270510       0.332000       0.351800       0.199300   -9999.000000
56074     56074     gansu          102.0700       34.0000          104       128     2012      09        20        264              0.218500      11.488464       1.269256       0.267986       0.337000       0.294100       0.227000       0.616000
56074     56074     gansu          102.0700       34.0000          104       128     2012      09        21        265              0.217458      10.502441       4.298174       0.271343   -9999.000000       0.259000       0.207600   -9999.000000
56074     56074     gansu          102.0700       34.0000          104       128     2012      09        22        266              0.247500      11.089142       7.020935       0.272842       0.234000       0.129800   -9999.000000       0.852000
56074     56074     gansu          102.0700       34.0000          104       128     2012      09        23        267              0.260708      11.019684       1.555296       0.290477       0.255000   -9999.000000       0.210300   -9999.000000
56074     56074     gansu          102.0700       34.0000          104       128     2012      09        24        268              0.268875      11.556641      10.493360       0.284388   -9999.000000       0.251800       0.119900   -9999.000000
56074     56074     gansu          102.0700       34.0000          104       128     2012      09        25        269              0.289478       8.877594       0.158635       0.297358   -9999.000000       0.450100       0.132200       0.744000
56074     56074     gansu          102.0700       34.0000          104       128     2012      09        26        270              0.274917       8.032959       0.486068       0.289256   -9999.000000       0.244000       0.111700   -9999.000000
56074     56074     gansu          102.0700       34.0000          104       128     2012      09        27        271              0.267214       8.550049       0.401416       0.280660       0.256500       0.228000   -9999.000000       0.630000
56074     56074     gansu          102.0700       34.0000          104       128     2012      09        28        272              0.257000       8.521790       0.295998       0.276195       0.291000   -9999.000000   -9999.000000   -9999.000000
56074     56074     gansu          102.0700       34.0000          104       128     2012      09        29        273              0.264208       9.707306       3.639626       0.272870   -9999.000000   -9999.000000       0.108100   -9999.000000
56074     56074     gansu          102.0700       34.0000          104       128     2012      09        30        274              0.260375       6.663879       0.118157       0.279287   -9999.000000   -9999.000000       0.108200       0.608000
56074     56074     gansu          102.0700       34.0000          104       128     2012      10        01        275              0.273500       8.603455       9.032399       0.273964   -9999.000000   -9999.000000       0.086800   -9999.000000
56074     56074     gansu          102.0700       34.0000          104       128     2012      10        02        276              0.337667       9.590668      10.514721       0.276504       0.241000   -9999.000000       0.086200       0.676000
56074     56074     gansu          102.0700       34.0000          104       128     2012      10        03        277              0.319250       5.284668       2.731273       0.302676       0.220000   -9999.000000   -9999.000000   -9999.000000
56074     56074     gansu          102.0700       34.0000          104       128     2012      10        04        278              0.311875       5.436737       1.338873       0.299435   -9999.000000   -9999.000000       0.075300       0.720000
56074     56074     gansu          102.0700       34.0000          104       128     2012      10        05        279              0.311167       6.070587       1.244755       0.290511   -9999.000000   -9999.000000       0.077600       0.758000
56074     56074     gansu          102.0700       34.0000          104       128     2012      10        06        280              0.313875       5.361969       0.615301       0.283632       0.240000   -9999.000000       0.071700   -9999.000000
56074     56074     gansu          102.0700       34.0000          104       128     2012      10        07        281              0.308125       6.643036       3.361400       0.281095       0.231000   -9999.000000       0.086800       0.723000
56074     56074     gansu          102.0700       34.0000          104       128     2012      10        08        282              0.302417       7.166260       0.945991       0.284317       0.230000   -9999.000000       0.079800   -9999.000000
56074     56074     gansu          102.0700       34.0000          104       128     2012      10        09        283              0.307583       5.597809       2.031290       0.279150       0.249000   -9999.000000   -9999.000000       0.766000
56074     56074     gansu          102.0700       34.0000          104       128     2012      10        10        284              0.314375       5.684814       4.836093       0.278551   -9999.000000   -9999.000000       0.071700       0.795000
56074     56074     gansu          102.0700       34.0000          104       128     2012      10        11        285              0.333292       5.958466       6.025668       0.281761   -9999.000000   -9999.000000       0.065800       0.830000
56074     56074     gansu          102.0700       34.0000          104       128     2012      10        12        286              0.327083       3.803314       0.888457       0.296074       0.193000   -9999.000000       0.084800       0.748000
56074     56074     gansu          102.0700       34.0000          104       128     2012      10        13        287              0.324000       4.466309       1.569757       0.287613   -9999.000000   -9999.000000       0.075000   -9999.000000
56074     56074     gansu          102.0700       34.0000          104       128     2012      10        14        288              0.323375       4.896332       1.817801       0.281864       0.208000   -9999.000000   -9999.000000       0.670000
56074     56074     gansu          102.0700       34.0000          104       128     2012      10        15        289              0.318000       5.898712       0.699984       0.282078   -9999.000000       0.226300   -9999.000000   -9999.000000
56074     56074     gansu          102.0700       34.0000          104       128     2012      10        16        290              0.311917       4.737305       0.288720       0.274379   -9999.000000   -9999.000000       0.076700       0.692000
56074     56074     gansu          102.0700       34.0000          104       128     2012      10        17        291              0.306750       3.380188       0.489683       0.241945       0.241000   -9999.000000       0.072200       0.648000
56074     56074     gansu          102.0700       34.0000          104       128     2012      10        18        292              0.303375       4.071625       0.093887       0.252283       0.228000       0.257000       0.100500   -9999.000000
56074     56074     gansu          102.0700       34.0000          104       128     2012      10        19        293              0.300583       5.252014       0.692639       0.264987   -9999.000000       0.283600       0.084600       0.641000
56074     56074     gansu          102.0700       34.0000          104       128     2012      10        20        294              0.300000       4.505402       0.035500       0.256973       0.235000   -9999.000000   -9999.000000   -9999.000000
56074     56074     gansu          102.0700       34.0000          104       128     2012      10        21        295              0.293000       4.592529       0.279725       0.254797   -9999.000000   -9999.000000       0.074500       0.613000
56074     56074     gansu          102.0700       34.0000          104       128     2012      10        22        296              0.292250       4.426910       0.154401       0.253709   -9999.000000       0.304800       0.081500   -9999.000000
56074     56074     gansu          102.0700       34.0000          104       128     2012      10        23        297              0.298583       4.450867       0.211935       0.256448   -9999.000000       0.338600       0.082700   -9999.000000
56074     56074     gansu          102.0700       34.0000          104       128     2012      10        24        298              0.316647       4.057434       0.532529       0.256862   -9999.000000   -9999.000000       0.091800       0.645000
56074     56074     gansu          102.0700       34.0000          104       128     2012      10        25        299              0.000000       3.222198       1.542614       0.251917       0.193000       0.271000   -9999.000000   -9999.000000
56074     56074     gansu          102.0700       34.0000          104       128     2012      10        26        300              0.000000       2.852875       1.820510       0.240664   -9999.000000       0.268200   -9999.000000       0.573000
56074     56074     gansu          102.0700       34.0000          104       128     2012      10        27        301              0.000000       2.113770       3.448260       0.228888   -9999.000000       0.222100       0.078300   -9999.000000
56074     56074     gansu          102.0700       34.0000          104       128     2012      10        28        302              0.000000       3.216278       0.786937       0.245362       0.204000       0.183400       0.076000   -9999.000000
56074     56074     gansu          102.0700       34.0000          104       128     2012      10        29        303              0.000000       3.932312       2.016150       0.254265       0.209000   -9999.000000       0.099800       0.496000
56074     56074     gansu          102.0700       34.0000          104       128     2012      10        30        304              0.000000       2.920715       1.361301       0.229992       0.204000       0.199100       0.090500   -9999.000000
56074     56074     gansu          102.0700       34.0000          104       128     2012      10        31        305              0.000000       0.602905       1.453271       0.187283   -9999.000000       0.117400   -9999.000000       0.510000
56074     56074     gansu          102.0700       34.0000          104       128     2012      11        01        306              0.000000       0.585724       0.968744       0.186691   -9999.000000       0.273300   -9999.000000   -9999.000000
56074     56074     gansu          102.0700       34.0000          104       128     2012      11        02        307              0.000000       0.001953       1.324094       0.167282   -9999.000000       0.126600       0.073700       0.697000
56074     56074     gansu          102.0700       34.0000          104       128     2012      11        03        308              0.000000       0.345245       2.802383       0.178882       0.205000   -9999.000000       0.068500       0.375000
56074     56074     gansu          102.0700       34.0000          104       128     2012      11        04        309              0.000000      -0.617981       4.018336       0.156895       0.199000       0.227700       0.093400   -9999.000000
56074     56074     gansu          102.0700       34.0000          104       128     2012      11        05        310              0.000000      -1.021301       1.634018       0.145711       0.198000       0.116500       0.095900       0.299000
56074     56074     gansu          102.0700       34.0000          104       128     2012      11        06        311              0.000000      -0.099152       0.557649       0.167786   -9999.000000   -9999.000000   -9999.000000   -9999.000000
56074     56074     gansu          102.0700       34.0000          104       128     2012      11        07        312              0.000000       0.968842       1.086935       0.191693   -9999.000000       0.162400       0.073800       0.470000
56074     56074     gansu          102.0700       34.0000          104       128     2012      11        08        313              0.000000       0.274292       0.239617       0.175768       0.190000       0.140000       0.079100       0.396000
56074     56074     gansu          102.0700       34.0000          104       128     2012      11        09        314              0.000000       0.272888       0.197567       0.175075       0.181000       0.162400       0.078200       0.605000
56074     56074     gansu          102.0700       34.0000          104       128     2012      11        10        315              0.000000      -0.103516       0.050119       0.167285       0.190000       0.130000       0.091300       0.342000
56074     56074     gansu          102.0700       34.0000          104       128     2012      11        11        316              0.000000      -0.330994       0.600779       0.162725   -9999.000000   -9999.000000   -9999.000000   -9999.000000
56074     56074     gansu          102.0700       34.0000          104       128     2012      11        12        317              0.000000      -0.325745       1.747346       0.162287   -9999.000000       0.186200   -9999.000000       0.188000
56074     56074     gansu          102.0700       34.0000          104       128     2012      11        13        318              0.000000      -0.849487       0.559693       0.149694       0.157000       0.146800       0.081100   -9999.000000
56074     56074     gansu          102.0700       34.0000          104       128     2012      11        14        319              0.000000      -0.533539       0.268186       0.162924       0.157000       0.166900       0.077700       0.538000
56074     56074     gansu          102.0700       34.0000          104       128     2012      11        15        320              0.000000       0.255768       0.064724       0.172048       0.163000       0.091200       0.101200       0.260000
56074     56074     gansu          102.0700       34.0000          104       128     2012      11        16        321              0.000000      -1.214569       0.257085       0.149200       0.158000   -9999.000000       0.089100   -9999.000000
56074     56074     gansu          102.0700       34.0000          104       128     2012      11        17        322              0.000000      -1.820343       0.363256       0.136590   -9999.000000       0.129200   -9999.000000       0.146000
56074     56074     gansu          102.0700       34.0000          104       128     2012      11        18        323              0.217750      -1.407898       0.026213       0.141923   -9999.000000       0.088800       0.076700   -9999.000000
56074     56074     gansu          102.0700       34.0000          104       128     2012      11        19        324              0.226083      -0.883240       0.048235       0.147529       0.146000       0.196400       0.069000       0.214000
56074     56074     gansu          102.0700       34.0000          104       128     2012      11        20        325              0.233333      -0.175873       0.075287       0.158560       0.140000       0.091400       0.066700   -9999.000000
56074     56074     gansu          102.0700       34.0000          104       128     2012      11        21        326              0.238250      -0.545319       0.061985       0.156182       0.141000   -9999.000000       0.079400   -9999.000000
56074     56074     gansu          102.0700       34.0000          104       128     2012      11        22        327              0.236333      -0.117859       0.000000       0.160550   -9999.000000       0.157800       0.076000       0.143000
56074     56074     gansu          102.0700       34.0000          104       128     2012      11        23        328              0.231458      -1.903351       0.000000       0.132273   -9999.000000       0.099200   -9999.000000   -9999.000000
56074     56074     gansu          102.0700       34.0000          104       128     2012      11        24        329              0.237375      -1.718445       0.126418       0.128167       0.127000       0.101200       0.066100       0.318000
56074     56074     gansu          102.0700       34.0000          104       128     2012      11        25        330              0.227375      -1.085938       0.029480       0.140774   -9999.000000       0.159800       0.063800   -9999.000000
56074     56074     gansu          102.0700       34.0000          104       128     2012      11        26        331              0.203792      -6.664734       5.248024       0.093111       0.117000   -9999.000000       0.067300   -9999.000000
56074     56074     gansu          102.0700       34.0000          104       128     2012      11        27        332              0.196875      -6.619843       0.107836       0.090093   -9999.000000       0.142500       0.067200       0.064000
56074     56074     gansu          102.0700       34.0000          104       128     2012      11        28        333              0.194167      -5.505035       0.134299       0.091847   -9999.000000   -9999.000000   -9999.000000   -9999.000000
56074     56074     gansu          102.0700       34.0000          104       128     2012      11        29        334              0.195542      -4.888458       0.034726       0.094403       0.119000   -9999.000000   -9999.000000       0.358000
56074     56074     gansu          102.0700       34.0000          104       128     2012      11        30        335              0.198708      -3.608673       0.283349       0.108316       0.124000       0.206000       0.062600   -9999.000000
56074     56074     gansu          102.0700       34.0000          104       128     2012      12        01        336              0.191750      -2.561737       0.322998       0.121025       0.119000       0.111300       0.063800       0.142000
56074     56074     gansu          102.0700       34.0000          104       128     2012      12        02        337              0.185375      -5.530609       0.073268       0.097876       0.119000       0.070400       0.073300       0.075000
56074     56074     gansu          102.0700       34.0000          104       128     2012      12        03        338              0.183750      -5.029297       0.404169       0.102123   -9999.000000   -9999.000000       0.066600   -9999.000000
56074     56074     gansu          102.0700       34.0000          104       128     2012      12        04        339              0.180667      -5.014801       0.192147       0.106586   -9999.000000   -9999.000000   -9999.000000       0.064000
56074     56074     gansu          102.0700       34.0000          104       128     2012      12        05        340              0.179167      -5.550476       0.040338       0.097750       0.115000       0.078400       0.066100   -9999.000000
56074     56074     gansu          102.0700       34.0000          104       128     2012      12        06        341              0.176625      -5.489288       0.120161       0.095285       0.105000   -9999.000000       0.064100       0.189000
56074     56074     gansu          102.0700       34.0000          104       128     2012      12        07        342              0.175667      -5.484558       0.051216       0.097114       0.111000       0.098300       0.065000       0.056000
56074     56074     gansu          102.0700       34.0000          104       128     2012      12        08        343              0.174292      -6.411713       0.121863       0.099188   -9999.000000   -9999.000000       0.068000       0.270000
56074     56074     gansu          102.0700       34.0000          104       128     2012      12        09        344              0.174917      -6.578064       0.084490       0.095461   -9999.000000   -9999.000000       0.069700       0.029000
56074     56074     gansu          102.0700       34.0000          104       128     2012      12        10        345              0.174833      -5.449921       0.103984       0.098345       0.107000       0.121100   -9999.000000   -9999.000000
56074     56074     gansu          102.0700       34.0000          104       128     2012      12        11        346              0.172875      -6.088867       0.116365       0.094098       0.099000   -9999.000000       0.063200       0.010000
56074     56074     gansu          102.0700       34.0000          104       128     2012      12        12        347              0.174958      -6.205200       0.040263       0.095098       0.094000       0.085800       0.063400   -9999.000000
56074     56074     gansu          102.0700       34.0000          104       128     2012      12        13        348              0.177917      -3.732849       0.075714       0.104693       0.092000       0.078100       0.065500       0.331000
56074     56074     gansu          102.0700       34.0000          104       128     2012      12        14        349              0.175542      -4.053131       0.068698       0.106671   -9999.000000   -9999.000000       0.065700       0.164000
56074     56074     gansu          102.0700       34.0000          104       128     2012      12        15        350              0.000000      -4.634369       0.581988       0.106796   -9999.000000   -9999.000000   -9999.000000   -9999.000000
56074     56074     gansu          102.0700       34.0000          104       128     2012      12        16        351              0.174292      -4.849030       0.056872       0.103528       0.093000   -9999.000000   -9999.000000       0.007000
56074     56074     gansu          102.0700       34.0000          104       128     2012      12        17        352              0.173708      -3.622620       0.053936       0.110363       0.094000   -9999.000000       0.065900   -9999.000000
56074     56074     gansu          102.0700       34.0000          104       128     2012      12        18        353              0.173125      -4.233887       0.204299       0.109325       0.095000       0.079400       0.069000       0.109000
56074     56074     gansu          102.0700       34.0000          104       128     2012      12        19        354              0.174542      -4.081268       0.000000       0.107082   -9999.000000   -9999.000000       0.072000   -9999.000000
56074     56074     gansu          102.0700       34.0000          104       128     2012      12        20        355              0.000000      -2.330811       0.134426       0.119151   -9999.000000   -9999.000000       0.069700   -9999.000000
56074     56074     gansu          102.0700       34.0000          104       128     2012      12        21        356              0.173292      -4.155029       0.157453       0.104884       0.098000   -9999.000000   -9999.000000       0.087000
56074     56074     gansu          102.0700       34.0000          104       128     2012      12        22        357              0.168208      -5.912811       0.110619       0.096250       0.098000   -9999.000000       0.065600   -9999.000000
56074     56074     gansu          102.0700       34.0000          104       128     2012      12        23        358              0.166458      -9.542877       0.139683       0.082442       0.103000   -9999.000000       0.070100       0.156000
56074     56074     gansu          102.0700       34.0000          104       128     2012      12        24        359              0.166158      -6.814850       0.946107       0.086057   -9999.000000   -9999.000000       0.060700   -9999.000000
56074     56074     gansu          102.0700       34.0000          104       128     2012      12        25        360              0.167333      -5.535492       0.251102       0.104716   -9999.000000   -9999.000000       0.061300   -9999.000000
56074     56074     gansu          102.0700       34.0000          104       128     2012      12        26        361              0.000000      -6.404541       0.000000       0.090612   -9999.000000   -9999.000000   -9999.000000       0.007000
56074     56074     gansu          102.0700       34.0000          104       128     2012      12        27        362              0.165500      -8.164825       0.210130       0.086004       0.099000   -9999.000000   -9999.000000   -9999.000000
56074     56074     gansu          102.0700       34.0000          104       128     2012      12        28        363              0.000000      -6.860657       0.160629       0.086315       0.103000   -9999.000000       0.059800       0.138000
56074     56074     gansu          102.0700       34.0000          104       128     2012      12        29        364              0.000000      -6.478058       0.161055       0.096822   -9999.000000   -9999.000000       0.060400   -9999.000000
56074     56074     gansu          102.0700       34.0000          104       128     2012      12        30        365              0.000000     -13.555328       0.000000       0.079390   -9999.000000   -9999.000000       0.062900       0.058000
56074     56074     gansu          102.0700       34.0000          104       128     2012      12        31        366              0.159800     -13.289642       0.000000       0.077126   -9999.000000   -9999.000000       0.059900   -9999.000000
