# Supplementary material for: Research on Fusing Multisatellite Soil Moisture Data Based on Bayesian Model Averaging
Source: Hindawi journal article supplement (doi:10.1155/2018/9310838), 2018-06-25
Supplement: f1 [file 9310838.f1.zip › 2012_sm00-10cm_daily_ZDB_ZHY_56080_366days_allin.txt]

56080     56080     gansu          102.9000       34.9900          100       132     2012      01        01        001              0.000000   -9999.000000       0.000000   -9999.000000       0.093000   -9999.000000   -9999.000000   -9999.000000
56080     56080     gansu          102.9000       34.9900          100       132     2012      01        02        002              0.030091      -4.961060       0.000000       0.092309   -9999.000000   -9999.000000       0.038400   -9999.000000
56080     56080     gansu          102.9000       34.9900          100       132     2012      01        03        003              0.000000      -6.792847       0.000000       0.078365   -9999.000000   -9999.000000       0.033000       0.082000
56080     56080     gansu          102.9000       34.9900          100       132     2012      01        04        004              0.024318      -8.987762       0.106982       0.073633   -9999.000000   -9999.000000       0.038100       0.028000
56080     56080     gansu          102.9000       34.9900          100       132     2012      01        05        005              0.024826      -7.471893       0.000000       0.075523   -9999.000000   -9999.000000       0.038700       0.081000
56080     56080     gansu          102.9000       34.9900          100       132     2012      01        06        006              0.025864      -4.969330       0.146323       0.090584   -9999.000000   -9999.000000   -9999.000000       0.065000
56080     56080     gansu          102.9000       34.9900          100       132     2012      01        07        007              0.026739      -4.398285       0.000000       0.099918   -9999.000000   -9999.000000   -9999.000000   -9999.000000
56080     56080     gansu          102.9000       34.9900          100       132     2012      01        08        008              0.000000      -5.680267       0.000000       0.087010   -9999.000000   -9999.000000       0.038700       0.004000
56080     56080     gansu          102.9000       34.9900          100       132     2012      01        09        009              0.029125      -5.116272       0.000000       0.086343   -9999.000000   -9999.000000       0.028600   -9999.000000
56080     56080     gansu          102.9000       34.9900          100       132     2012      01        10        010              0.028167      -5.073761       0.000000       0.088199   -9999.000000   -9999.000000   -9999.000000       0.017000
56080     56080     gansu          102.9000       34.9900          100       132     2012      01        11        011              0.027000      -6.630463       0.000000       0.077203   -9999.000000   -9999.000000       0.032700       0.050000
56080     56080     gansu          102.9000       34.9900          100       132     2012      01        12        012              0.028333      -6.225647       0.000000       0.084045   -9999.000000   -9999.000000   -9999.000000   -9999.000000
56080     56080     gansu          102.9000       34.9900          100       132     2012      01        13        013              0.029833      -4.643768       0.000000       0.092685   -9999.000000   -9999.000000       0.033500       0.044000
56080     56080     gansu          102.9000       34.9900          100       132     2012      01        14        014              0.028208      -6.634125       0.000000       0.078532   -9999.000000   -9999.000000       0.032600   -9999.000000
56080     56080     gansu          102.9000       34.9900          100       132     2012      01        15        015              0.026652      -7.662170       0.000000       0.075320   -9999.000000   -9999.000000       0.030500       0.049000
56080     56080     gansu          102.9000       34.9900          100       132     2012      01        16        016              0.027292      -5.804871       0.000000       0.086603   -9999.000000   -9999.000000       0.027800   -9999.000000
56080     56080     gansu          102.9000       34.9900          100       132     2012      01        17        017              0.000000      -4.505280       0.000000       0.093573   -9999.000000   -9999.000000       0.023500   -9999.000000
56080     56080     gansu          102.9000       34.9900          100       132     2012      01        18        018              0.028167      -6.484772       0.000000       0.079991   -9999.000000   -9999.000000   -9999.000000       0.124000
56080     56080     gansu          102.9000       34.9900          100       132     2012      01        19        019              0.028458      -6.125732       0.000000       0.079285   -9999.000000   -9999.000000       0.030900   -9999.000000
56080     56080     gansu          102.9000       34.9900          100       132     2012      01        20        020              0.028333      -7.362671       0.000000       0.075457   -9999.000000   -9999.000000       0.024300       0.134000
56080     56080     gansu          102.9000       34.9900          100       132     2012      01        21        021              0.028167      -8.891083       0.000000       0.073745   -9999.000000   -9999.000000       0.025500   -9999.000000
56080     56080     gansu          102.9000       34.9900          100       132     2012      01        22        022              0.027043     -10.600922       0.000000       0.071929   -9999.000000   -9999.000000       0.023800       0.101000
56080     56080     gansu          102.9000       34.9900          100       132     2012      01        23        023              0.026652      -9.787659       0.000000       0.069837   -9999.000000   -9999.000000   -9999.000000       0.168000
56080     56080     gansu          102.9000       34.9900          100       132     2012      01        24        024              0.026125      -9.080780       0.000000       0.071828   -9999.000000   -9999.000000   -9999.000000       0.076000
56080     56080     gansu          102.9000       34.9900          100       132     2012      01        25        025              0.025583      -8.624603       0.000000       0.073122   -9999.000000   -9999.000000       0.024400       0.110000
56080     56080     gansu          102.9000       34.9900          100       132     2012      01        26        026              0.025750      -5.611572       0.000000       0.088219   -9999.000000   -9999.000000       0.018700   -9999.000000
56080     56080     gansu          102.9000       34.9900          100       132     2012      01        27        027              0.025875      -4.577484       0.000000       0.100699   -9999.000000   -9999.000000       0.025300   -9999.000000
56080     56080     gansu          102.9000       34.9900          100       132     2012      01        28        028              0.026042      -4.956635       0.000000       0.094506   -9999.000000   -9999.000000       0.019700       0.122000
56080     56080     gansu          102.9000       34.9900          100       132     2012      01        29        029              0.026208      -4.613678       0.000000       0.097487   -9999.000000   -9999.000000   -9999.000000       0.097000
56080     56080     gansu          102.9000       34.9900          100       132     2012      01        30        030              0.026208      -5.073456       0.000000       0.087493   -9999.000000   -9999.000000       0.023300       0.169000
56080     56080     gansu          102.9000       34.9900          100       132     2012      01        31        031              0.025458      -4.273041       0.000000       0.104511   -9999.000000   -9999.000000       0.019900   -9999.000000
56080     56080     gansu          102.9000       34.9900          100       132     2012      02        01        032              0.026000      -3.233795       0.000000       0.115352   -9999.000000   -9999.000000       0.015900       0.227000
56080     56080     gansu          102.9000       34.9900          100       132     2012      02        02        033              0.027300      -3.396179       0.000000       0.107491   -9999.000000   -9999.000000       0.017800       0.195000
56080     56080     gansu          102.9000       34.9900          100       132     2012      02        03        034              0.027250      -4.027283       0.000000       0.103576   -9999.000000   -9999.000000       0.015700       0.201000
56080     56080     gansu          102.9000       34.9900          100       132     2012      02        04        035              0.027938      -3.116821       0.000000       0.111652   -9999.000000   -9999.000000   -9999.000000       0.199000
56080     56080     gansu          102.9000       34.9900          100       132     2012      02        05        036              0.032000      -1.060303       0.000000       0.127531   -9999.000000   -9999.000000       0.022900   -9999.000000
56080     56080     gansu          102.9000       34.9900          100       132     2012      02        06        037              0.031667      -0.742676       0.000000       0.129871   -9999.000000   -9999.000000       0.010900       0.154000
56080     56080     gansu          102.9000       34.9900          100       132     2012      02        07        038              0.030958      -3.458405       0.000000       0.106409   -9999.000000   -9999.000000       0.023300   -9999.000000
56080     56080     gansu          102.9000       34.9900          100       132     2012      02        08        039              0.031042      -3.712128       0.000000       0.106187   -9999.000000   -9999.000000       0.014400       0.155000
56080     56080     gansu          102.9000       34.9900          100       132     2012      02        09        040              0.027227      -3.501251       0.000000       0.106168   -9999.000000   -9999.000000   -9999.000000       0.178000
56080     56080     gansu          102.9000       34.9900          100       132     2012      02        10        041              0.027375      -8.061676       0.000000       0.076377   -9999.000000   -9999.000000   -9999.000000   -9999.000000
56080     56080     gansu          102.9000       34.9900          100       132     2012      02        11        042              0.030208      -4.777863       0.000000       0.094660       0.106000   -9999.000000       0.022800       0.231000
56080     56080     gansu          102.9000       34.9900          100       132     2012      02        12        043              0.030125      -1.885498       0.000000       0.119907   -9999.000000   -9999.000000       0.020300   -9999.000000
56080     56080     gansu          102.9000       34.9900          100       132     2012      02        13        044              0.030375      -2.353943       0.000000       0.113142   -9999.000000   -9999.000000       0.028200       0.243000
56080     56080     gansu          102.9000       34.9900          100       132     2012      02        14        045              0.035208      -1.941437       0.000000       0.118069   -9999.000000   -9999.000000   -9999.000000   -9999.000000
56080     56080     gansu          102.9000       34.9900          100       132     2012      02        15        046              0.037708      -2.105835       0.000000       0.115660   -9999.000000   -9999.000000   -9999.000000   -9999.000000
56080     56080     gansu          102.9000       34.9900          100       132     2012      02        16        047              0.035609      -3.979980       0.000000       0.100189   -9999.000000   -9999.000000       0.020100       0.280000
56080     56080     gansu          102.9000       34.9900          100       132     2012      02        17        048              0.032458      -4.099304       0.000000       0.100331   -9999.000000   -9999.000000       0.018800   -9999.000000
56080     56080     gansu          102.9000       34.9900          100       132     2012      02        18        049              0.031625      -5.510071       0.000000       0.087715   -9999.000000   -9999.000000       0.011500       0.265000
56080     56080     gansu          102.9000       34.9900          100       132     2012      02        19        050              0.033917      -3.571686       0.000000       0.105192   -9999.000000   -9999.000000       0.024200   -9999.000000
56080     56080     gansu          102.9000       34.9900          100       132     2012      02        20        051              0.038125      -1.234833       0.000000       0.125459   -9999.000000   -9999.000000       0.025400       0.411000
56080     56080     gansu          102.9000       34.9900          100       132     2012      02        21        052              0.052583       0.144592       0.000000       0.139263       0.107000   -9999.000000   -9999.000000       0.444000
56080     56080     gansu          102.9000       34.9900          100       132     2012      02        22        053              0.058083       2.403442       0.000000       0.159881   -9999.000000   -9999.000000       0.022500       0.272000
56080     56080     gansu          102.9000       34.9900          100       132     2012      02        23        054              0.063500       0.483765       0.000000       0.146090       0.110000   -9999.000000       0.015800       0.258000
56080     56080     gansu          102.9000       34.9900          100       132     2012      02        24        055              0.049500       0.895752       0.000000       0.145281   -9999.000000   -9999.000000       0.027900   -9999.000000
56080     56080     gansu          102.9000       34.9900          100       132     2012      02        25        056              0.038625      -3.188690       0.000000       0.098391   -9999.000000   -9999.000000       0.018000       0.209000
56080     56080     gansu          102.9000       34.9900          100       132     2012      02        26        057              0.040542      -3.900940       0.000000       0.094993   -9999.000000   -9999.000000   -9999.000000       0.381000
56080     56080     gansu          102.9000       34.9900          100       132     2012      02        27        058              0.047583      -1.263885       0.000000       0.126746       0.100000   -9999.000000       0.012400       0.367000
56080     56080     gansu          102.9000       34.9900          100       132     2012      02        28        059              0.052522       1.020569       0.000000       0.145879   -9999.000000   -9999.000000   -9999.000000       0.341000
56080     56080     gansu          102.9000       34.9900          100       132     2012      02        29        060              0.000000   -9999.000000       0.000000   -9999.000000   -9999.000000   -9999.000000   -9999.000000   -9999.000000
56080     56080     gansu          102.9000       34.9900          100       132     2012      03        01        061              0.067917       0.937469       0.000000       0.147138   -9999.000000   -9999.000000       0.032700       0.412000
56080     56080     gansu          102.9000       34.9900          100       132     2012      03        02        062              0.077909       0.116577       0.000000       0.138408   -9999.000000   -9999.000000       0.030500       0.501000
56080     56080     gansu          102.9000       34.9900          100       132     2012      03        03        063              0.096333       1.536591       0.000000       0.152956       0.125000   -9999.000000   -9999.000000       0.381000
56080     56080     gansu          102.9000       34.9900          100       132     2012      03        04        064              0.107542       0.415955       0.000000       0.144426       0.115000   -9999.000000       0.025800       0.377000
56080     56080     gansu          102.9000       34.9900          100       132     2012      03        05        065              0.106565       1.734467       0.000000       0.153259   -9999.000000   -9999.000000       0.026100   -9999.000000
56080     56080     gansu          102.9000       34.9900          100       132     2012      03        06        066              0.135000       0.768860       0.088877       0.140179   -9999.000000   -9999.000000       0.016600       0.392000
56080     56080     gansu          102.9000       34.9900          100       132     2012      03        07        067              0.000000       0.382660       0.000000       0.139500   -9999.000000   -9999.000000       0.020600   -9999.000000
56080     56080     gansu          102.9000       34.9900          100       132     2012      03        08        068              0.138696      -1.667938       0.000000       0.117276   -9999.000000   -9999.000000   -9999.000000       0.380000
56080     56080     gansu          102.9000       34.9900          100       132     2012      03        09        069              0.149500      -2.435028       0.000000       0.109339   -9999.000000   -9999.000000   -9999.000000       0.403000
56080     56080     gansu          102.9000       34.9900          100       132     2012      03        10        070              0.156042      -0.978455       0.000000       0.127469   -9999.000000   -9999.000000       0.025700   -9999.000000
56080     56080     gansu          102.9000       34.9900          100       132     2012      03        11        071              0.199917       0.227936       0.000000       0.136033   -9999.000000   -9999.000000       0.018300       0.556000
56080     56080     gansu          102.9000       34.9900          100       132     2012      03        12        072              0.226087       2.319244       0.000000       0.157482   -9999.000000   -9999.000000       0.045000   -9999.000000
56080     56080     gansu          102.9000       34.9900          100       132     2012      03        13        073              0.229875       2.757996       0.000000       0.161412       0.123000   -9999.000000       0.042500       0.526000
56080     56080     gansu          102.9000       34.9900          100       132     2012      03        14        074              0.236458       4.626953       0.000000       0.172970       0.127000   -9999.000000   -9999.000000   -9999.000000
56080     56080     gansu          102.9000       34.9900          100       132     2012      03        15        075              0.238304       5.609772       0.000000       0.186942       0.121000   -9999.000000       0.018000   -9999.000000
56080     56080     gansu          102.9000       34.9900          100       132     2012      03        16        076              0.236409       4.694946       0.000000       0.179768   -9999.000000   -9999.000000       0.025300       0.691000
56080     56080     gansu          102.9000       34.9900          100       132     2012      03        17        077              0.229917       4.286438       0.000000       0.172638   -9999.000000   -9999.000000       0.019300   -9999.000000
56080     56080     gansu          102.9000       34.9900          100       132     2012      03        18        078              0.223000       6.039459       0.000000       0.180103       0.125000   -9999.000000       0.046700       0.552000
56080     56080     gansu          102.9000       34.9900          100       132     2012      03        19        079              0.218125       5.910339       0.000000       0.180508       0.133000   -9999.000000       0.063700   -9999.000000
56080     56080     gansu          102.9000       34.9900          100       132     2012      03        20        080              0.214188       7.120667       0.000000       0.183332       0.127000   -9999.000000   -9999.000000       0.639000
56080     56080     gansu          102.9000       34.9900          100       132     2012      03        21        081              0.000000       8.229645       0.000000       0.187545   -9999.000000   -9999.000000       0.036000       0.619000
56080     56080     gansu          102.9000       34.9900          100       132     2012      03        22        082              0.000000       1.827637       1.592651       0.157147   -9999.000000   -9999.000000       0.022800       0.323000
56080     56080     gansu          102.9000       34.9900          100       132     2012      03        23        083              0.195571      -1.356110       0.000000       0.117406       0.114000   -9999.000000       0.059700       0.529000
56080     56080     gansu          102.9000       34.9900          100       132     2012      03        24        084              0.204667       2.040466       0.000000       0.146077       0.125000   -9999.000000       0.063300   -9999.000000
56080     56080     gansu          102.9000       34.9900          100       132     2012      03        25        085              0.000000       5.206573       0.000000       0.166486       0.125000   -9999.000000   -9999.000000       0.727000
56080     56080     gansu          102.9000       34.9900          100       132     2012      03        26        086              0.200250       6.381866       0.000000       0.174411       0.115000   -9999.000000   -9999.000000   -9999.000000
56080     56080     gansu          102.9000       34.9900          100       132     2012      03        27        087              0.196958       7.962433       0.000000       0.178058   -9999.000000   -9999.000000       0.055500       0.712000
56080     56080     gansu          102.9000       34.9900          100       132     2012      03        28        088              0.192417       9.185516       0.000000       0.182079   -9999.000000   -9999.000000       0.045600       0.774000
56080     56080     gansu          102.9000       34.9900          100       132     2012      03        29        089              0.184750       9.473236       0.000000       0.181481       0.116000   -9999.000000       0.062800   -9999.000000
56080     56080     gansu          102.9000       34.9900          100       132     2012      03        30        090              0.182542       7.577057       0.104151       0.177281       0.120000   -9999.000000       0.054000       0.561000
56080     56080     gansu          102.9000       34.9900          100       132     2012      03        31        091              0.180375       3.473724       2.256022       0.153832       0.123000   -9999.000000   -9999.000000       0.633000
56080     56080     gansu          102.9000       34.9900          100       132     2012      04        01        092              0.181083       6.984619       0.000000       0.181947   -9999.000000       0.173900       0.044000       0.762000
56080     56080     gansu          102.9000       34.9900          100       132     2012      04        02        093              0.181000       7.575073       0.155134       0.195412   -9999.000000   -9999.000000       0.047500       0.539000
56080     56080     gansu          102.9000       34.9900          100       132     2012      04        03        094              0.182625       8.348419       0.000000       0.185131       0.119000       0.027900       0.045500   -9999.000000
56080     56080     gansu          102.9000       34.9900          100       132     2012      04        04        095              0.181875      10.408173       0.000000       0.182763       0.117000   -9999.000000       0.065600       0.816000
56080     56080     gansu          102.9000       34.9900          100       132     2012      04        05        096              0.178625      10.504791       0.000000       0.179804       0.113000   -9999.000000       0.063000   -9999.000000
56080     56080     gansu          102.9000       34.9900          100       132     2012      04        06        097              0.177750       7.915771       0.118536       0.178897   -9999.000000   -9999.000000   -9999.000000       0.621000
56080     56080     gansu          102.9000       34.9900          100       132     2012      04        07        098              0.179000       6.109131       0.000000       0.179162   -9999.000000   -9999.000000       0.049600       0.526000
56080     56080     gansu          102.9000       34.9900          100       132     2012      04        08        099              0.180208       8.285400       0.083747       0.177149       0.107000       0.086000       0.056100   -9999.000000
56080     56080     gansu          102.9000       34.9900          100       132     2012      04        09        100              0.179125      11.315979       0.348539       0.176708       0.126000   -9999.000000       0.060900       0.608000
56080     56080     gansu          102.9000       34.9900          100       132     2012      04        10        101              0.179833       9.104767       3.366823       0.178233       0.124000   -9999.000000       0.060200   -9999.000000
56080     56080     gansu          102.9000       34.9900          100       132     2012      04        11        102              0.178167      11.348633       0.406312       0.174520   -9999.000000       0.077600   -9999.000000       0.629000
56080     56080     gansu          102.9000       34.9900          100       132     2012      04        12        103              0.176417       9.350769       0.282630       0.168541   -9999.000000   -9999.000000   -9999.000000   -9999.000000
56080     56080     gansu          102.9000       34.9900          100       132     2012      04        13        104              0.176042       7.060547       0.000000       0.164606       0.111000   -9999.000000       0.048300   -9999.000000
56080     56080     gansu          102.9000       34.9900          100       132     2012      04        14        105              0.177167       9.446442       0.134536       0.168978       0.113000   -9999.000000       0.047500       0.796000
56080     56080     gansu          102.9000       34.9900          100       132     2012      04        15        106              0.178875      10.351654       0.325593       0.170085   -9999.000000   -9999.000000       0.056400   -9999.000000
56080     56080     gansu          102.9000       34.9900          100       132     2012      04        16        107              0.181333       8.012695       0.358510       0.171810   -9999.000000   -9999.000000       0.064900       0.731000
56080     56080     gansu          102.9000       34.9900          100       132     2012      04        17        108              0.191750       5.456909       0.909196       0.177435   -9999.000000   -9999.000000   -9999.000000   -9999.000000
56080     56080     gansu          102.9000       34.9900          100       132     2012      04        18        109              0.192208       7.607391       0.205813       0.176611   -9999.000000   -9999.000000   -9999.000000       0.730000
56080     56080     gansu          102.9000       34.9900          100       132     2012      04        19        110              0.188042      10.616638       0.509891       0.174553       0.115000   -9999.000000       0.056700       0.726000
56080     56080     gansu          102.9000       34.9900          100       132     2012      04        20        111              0.186167       9.208923       0.237903       0.178269       0.111000   -9999.000000       0.056000       0.663000
56080     56080     gansu          102.9000       34.9900          100       132     2012      04        21        112              0.184500      10.794403       0.583523       0.175767       0.118000       0.098900       0.068800       0.553000
56080     56080     gansu          102.9000       34.9900          100       132     2012      04        22        113              0.183625      12.217468       1.512347       0.169849   -9999.000000   -9999.000000   -9999.000000   -9999.000000
56080     56080     gansu          102.9000       34.9900          100       132     2012      04        23        114              0.186417      15.430084       1.741797       0.161580   -9999.000000   -9999.000000   -9999.000000       0.634000
56080     56080     gansu          102.9000       34.9900          100       132     2012      04        24        115              0.193208      11.189606       0.000000       0.177909       0.110000       0.161400       0.060000       0.676000
56080     56080     gansu          102.9000       34.9900          100       132     2012      04        25        116              0.000000      10.818451       4.605566       0.173852       0.114000   -9999.000000       0.062800       0.639000
56080     56080     gansu          102.9000       34.9900          100       132     2012      04        26        117              0.186000      12.167572       2.310742       0.177809       0.116000       0.161800       0.065400       0.550000
56080     56080     gansu          102.9000       34.9900          100       132     2012      04        27        118              0.183750      12.766357       0.000000       0.209257   -9999.000000   -9999.000000       0.069700   -9999.000000
56080     56080     gansu          102.9000       34.9900          100       132     2012      04        28        119              0.179667      13.906250       0.252865       0.199205   -9999.000000   -9999.000000   -9999.000000       0.489000
56080     56080     gansu          102.9000       34.9900          100       132     2012      04        29        120              0.177087      14.464172       5.905566       0.184031       0.103000       0.082100   -9999.000000       0.606000
56080     56080     gansu          102.9000       34.9900          100       132     2012      04        30        121              0.179542      14.938324      42.655857       0.206308       0.159000   -9999.000000       0.067800       0.820000
56080     56080     gansu          102.9000       34.9900          100       132     2012      05        01        122              0.178833       9.807556       5.017455       0.219016       0.141000       0.127800       0.060700       0.651000
56080     56080     gansu          102.9000       34.9900          100       132     2012      05        02        123              0.177167       9.306976       0.118780       0.208610       0.134000   -9999.000000       0.066000   -9999.000000
56080     56080     gansu          102.9000       34.9900          100       132     2012      05        03        124              0.179875       8.324219       0.835256       0.206291       0.151000   -9999.000000       0.059900       0.698000
56080     56080     gansu          102.9000       34.9900          100       132     2012      05        04        125              0.187125      11.527649       0.320365       0.205736       0.133000   -9999.000000   -9999.000000   -9999.000000
56080     56080     gansu          102.9000       34.9900          100       132     2012      05        05        126              0.184792      12.762970       0.277078       0.205130       0.133000   -9999.000000       0.064400       0.691000
56080     56080     gansu          102.9000       34.9900          100       132     2012      05        06        127              0.185250      12.429352       2.839914       0.202815   -9999.000000   -9999.000000       0.064500       0.936000
56080     56080     gansu          102.9000       34.9900          100       132     2012      05        07        128              0.194833      13.417114       3.332999       0.215527   -9999.000000       0.262400       0.088000   -9999.000000
56080     56080     gansu          102.9000       34.9900          100       132     2012      05        08        129              0.197792      12.263702       3.249771       0.230080   -9999.000000   -9999.000000       0.099200       0.977000
56080     56080     gansu          102.9000       34.9900          100       132     2012      05        09        130              0.194542      12.535034       3.346184       0.235025   -9999.000000       0.318900       0.081700   -9999.000000
56080     56080     gansu          102.9000       34.9900          100       132     2012      05        10        131              0.189500      16.643738       6.895507       0.218024       0.169000   -9999.000000   -9999.000000       0.974000
56080     56080     gansu          102.9000       34.9900          100       132     2012      05        11        132              0.191125      15.856354       1.457091       0.242843   -9999.000000   -9999.000000       0.080500   -9999.000000
56080     56080     gansu          102.9000       34.9900          100       132     2012      05        12        133              0.193000      13.064972       0.606298       0.235894       0.169000   -9999.000000       0.073000   -9999.000000
56080     56080     gansu          102.9000       34.9900          100       132     2012      05        13        134              0.233583      13.392548       4.488654       0.225557   -9999.000000   -9999.000000       0.093200       0.910000
56080     56080     gansu          102.9000       34.9900          100       132     2012      05        14        135              0.231708       6.935272       0.194319       0.245710   -9999.000000   -9999.000000       0.099600   -9999.000000
56080     56080     gansu          102.9000       34.9900          100       132     2012      05        15        136              0.214458      10.983673       0.000000       0.230041       0.151000   -9999.000000   -9999.000000       0.820000
56080     56080     gansu          102.9000       34.9900          100       132     2012      05        16        137              0.201917      13.586060       0.000000       0.219056       0.151000   -9999.000000       0.076000   -9999.000000
56080     56080     gansu          102.9000       34.9900          100       132     2012      05        17        138              0.192417      14.001648       0.097418       0.211326       0.146000       0.213200       0.074600       0.714000
56080     56080     gansu          102.9000       34.9900          100       132     2012      05        18        139              0.186542      12.860931       0.015122       0.208667   -9999.000000       0.288900       0.071700       0.705000
56080     56080     gansu          102.9000       34.9900          100       132     2012      05        19        140              0.180833      14.635315       0.349026       0.201810       0.121000       0.212300       0.067800       0.813000
56080     56080     gansu          102.9000       34.9900          100       132     2012      05        20        141              0.189917      18.378723      11.406891       0.194104       0.106000   -9999.000000       0.066600       1.000000
56080     56080     gansu          102.9000       34.9900          100       132     2012      05        21        142              0.241958      19.662354      11.621590       0.233835       0.296000   -9999.000000   -9999.000000   -9999.000000
56080     56080     gansu          102.9000       34.9900          100       132     2012      05        22        143              0.245583      10.136383       0.842552       0.276155       0.285000   -9999.000000       0.085200       1.000000
56080     56080     gansu          102.9000       34.9900          100       132     2012      05        23        144              0.237292      10.491669       0.769253       0.256566   -9999.000000   -9999.000000       0.079500       0.933000
56080     56080     gansu          102.9000       34.9900          100       132     2012      05        24        145              0.236375       9.733063       4.836547       0.248816   -9999.000000   -9999.000000       0.080700       0.946000
56080     56080     gansu          102.9000       34.9900          100       132     2012      05        25        146              0.000000      10.317780       1.732557       0.254546       0.242000   -9999.000000       0.095200       1.000000
56080     56080     gansu          102.9000       34.9900          100       132     2012      05        26        147              0.234958       9.888641       0.845077       0.256631       0.227000       0.262200       0.073800   -9999.000000
56080     56080     gansu          102.9000       34.9900          100       132     2012      05        27        148              0.228292      15.978485      17.005009       0.241809       0.221000       0.216300   -9999.000000       0.932000
56080     56080     gansu          102.9000       34.9900          100       132     2012      05        28        149              0.261792      18.280365       7.019710       0.255765   -9999.000000   -9999.000000   -9999.000000       0.985000
56080     56080     gansu          102.9000       34.9900          100       132     2012      05        29        150              0.244208      11.511017       0.262634       0.285245       0.210000   -9999.000000       0.073300       1.000000
56080     56080     gansu          102.9000       34.9900          100       132     2012      05        30        151              0.230708      15.989624       0.396194       0.257785       0.178000   -9999.000000       0.080200   -9999.000000
56080     56080     gansu          102.9000       34.9900          100       132     2012      05        31        152              0.237042      18.046143       3.852862       0.245510       0.215000       0.482700       0.082800   -9999.000000
56080     56080     gansu          102.9000       34.9900          100       132     2012      06        01        153              0.229875      11.553925       0.062467       0.257532       0.269000       0.195900   -9999.000000       0.898000
56080     56080     gansu          102.9000       34.9900          100       132     2012      06        02        154              0.222208      16.042725       4.418595       0.242543       0.240000   -9999.000000       0.074500   -9999.000000
56080     56080     gansu          102.9000       34.9900          100       132     2012      06        03        155              0.221833      13.704407       0.843533       0.252628   -9999.000000       0.283500   -9999.000000       0.910000
56080     56080     gansu          102.9000       34.9900          100       132     2012      06        04        156              0.213042      13.321930       0.306674       0.249339       0.226000       0.231800       0.110200       0.936000
56080     56080     gansu          102.9000       34.9900          100       132     2012      06        05        157              0.208250      13.195190       0.628220       0.242124       0.245500       0.200400       0.127900   -9999.000000
56080     56080     gansu          102.9000       34.9900          100       132     2012      06        06        158              0.206250      13.755890       3.276227       0.241147       0.247000       0.264600       0.114200       0.975000
56080     56080     gansu          102.9000       34.9900          100       132     2012      06        07        159              0.204875      14.898712       1.177820       0.244988       0.242000   -9999.000000   -9999.000000   -9999.000000
56080     56080     gansu          102.9000       34.9900          100       132     2012      06        08        160              0.197125      17.606812       1.077993       0.236855   -9999.000000   -9999.000000       0.107700       0.825000
56080     56080     gansu          102.9000       34.9900          100       132     2012      06        09        161              0.205250      13.708069       4.144678       0.240017       0.203000   -9999.000000       0.095100   -9999.000000
56080     56080     gansu          102.9000       34.9900          100       132     2012      06        10        162              0.209583      16.934021       0.591289       0.246202       0.207000   -9999.000000       0.116000   -9999.000000
56080     56080     gansu          102.9000       34.9900          100       132     2012      06        11        163              0.000000      14.609131       0.534517       0.239148       0.293000       0.265700       0.075500       0.761000
56080     56080     gansu          102.9000       34.9900          100       132     2012      06        12        164              0.195792      15.609558       0.894407       0.232735   -9999.000000   -9999.000000       0.071200   -9999.000000
56080     56080     gansu          102.9000       34.9900          100       132     2012      06        13        165              0.187833      14.697876       0.100566       0.231392       0.295000   -9999.000000   -9999.000000       0.809000
56080     56080     gansu          102.9000       34.9900          100       132     2012      06        14        166              0.181583      16.085693       7.408764       0.223927       0.261000       0.187000       0.077400   -9999.000000
56080     56080     gansu          102.9000       34.9900          100       132     2012      06        15        167              0.181208      15.727264       0.456213       0.248368       0.278000   -9999.000000       0.069700       0.825000
56080     56080     gansu          102.9000       34.9900          100       132     2012      06        16        168              0.177167      15.321777       0.022099       0.241984       0.264500   -9999.000000       0.070400       0.761000
56080     56080     gansu          102.9000       34.9900          100       132     2012      06        17        169              0.168792      16.430664       1.597417       0.229022       0.254000   -9999.000000       0.073600       0.822000
56080     56080     gansu          102.9000       34.9900          100       132     2012      06        18        170              0.161208      15.546936       0.421418       0.231123       0.256000       0.351300   -9999.000000       0.666000
56080     56080     gansu          102.9000       34.9900          100       132     2012      06        19        171              0.151708      17.317444       0.616153       0.222221       0.254000       0.064600       0.120600   -9999.000000
56080     56080     gansu          102.9000       34.9900          100       132     2012      06        20        172              0.147083      17.791687       1.562471       0.215942       0.265000   -9999.000000       0.117200       0.672000
56080     56080     gansu          102.9000       34.9900          100       132     2012      06        21        173              0.141542      17.641663       0.568385       0.217594       0.336000   -9999.000000       0.118800       0.745000
56080     56080     gansu          102.9000       34.9900          100       132     2012      06        22        174              0.170000      17.126495       3.232117       0.214332       0.323500       0.164500       0.120400       0.758000
56080     56080     gansu          102.9000       34.9900          100       132     2012      06        23        175              0.187000      17.344513       5.264117       0.224567   -9999.000000       0.202600       0.119600       0.736000
56080     56080     gansu          102.9000       34.9900          100       132     2012      06        24        176              0.181667      17.771210       1.722479       0.241731   -9999.000000   -9999.000000   -9999.000000   -9999.000000
56080     56080     gansu          102.9000       34.9900          100       132     2012      06        25        177              0.179292      16.989288       0.000000       0.235052       0.323000   -9999.000000       0.132800       0.613000
56080     56080     gansu          102.9000       34.9900          100       132     2012      06        26        178              0.183958      18.400726       4.866481       0.223267       0.338500       0.256400       0.147000       0.751000
56080     56080     gansu          102.9000       34.9900          100       132     2012      06        27        179              0.266417      16.830292      13.344782       0.234128       0.403000   -9999.000000       0.144200       0.853000
56080     56080     gansu          102.9000       34.9900          100       132     2012      06        28        180              0.285542      16.427521       9.502656       0.272268       0.421000   -9999.000000       0.150400       1.000000
56080     56080     gansu          102.9000       34.9900          100       132     2012      06        29        181              0.268917      14.046722       0.451991       0.278786   -9999.000000       0.409300   -9999.000000   -9999.000000
56080     56080     gansu          102.9000       34.9900          100       132     2012      06        30        182              0.243792      15.526855       0.000000       0.262345       0.336000   -9999.000000   -9999.000000   -9999.000000
56080     56080     gansu          102.9000       34.9900          100       132     2012      07        01        183              0.242375      18.794586       4.876298       0.246928       0.405500   -9999.000000       0.144700   -9999.000000
56080     56080     gansu          102.9000       34.9900          100       132     2012      07        02        184              0.241542      19.768097       1.900561       0.251847       0.423500       0.406000       0.128600       0.847000
56080     56080     gansu          102.9000       34.9900          100       132     2012      07        03        185              0.238417      18.606964       3.721484       0.250158       0.473000   -9999.000000       0.133600       0.952000
56080     56080     gansu          102.9000       34.9900          100       132     2012      07        04        186              0.234542      14.881989       0.427669       0.259212       0.379000   -9999.000000       0.131200   -9999.000000
56080     56080     gansu          102.9000       34.9900          100       132     2012      07        05        187              0.221208      16.185669       0.577507       0.247036   -9999.000000   -9999.000000   -9999.000000       0.813000
56080     56080     gansu          102.9000       34.9900          100       132     2012      07        06        188              0.236875      19.423248       3.827720       0.236143   -9999.000000   -9999.000000       0.130700   -9999.000000
56080     56080     gansu          102.9000       34.9900          100       132     2012      07        07        189              0.228292      15.949554      11.946235       0.252367   -9999.000000       0.239300       0.134200       0.785000
56080     56080     gansu          102.9000       34.9900          100       132     2012      07        08        190              0.270417      18.166046       3.626009       0.251261       0.455500   -9999.000000       0.129400   -9999.000000
56080     56080     gansu          102.9000       34.9900          100       132     2012      07        09        191              0.273042      15.876953       3.981119       0.274833       0.458000       0.242000       0.115400   -9999.000000
56080     56080     gansu          102.9000       34.9900          100       132     2012      07        10        192              0.249583      16.107300       0.484305       0.269035   -9999.000000   -9999.000000       0.109500       0.899000
56080     56080     gansu          102.9000       34.9900          100       132     2012      07        11        193              0.280792      18.835968      10.708301       0.251122       0.416000       0.219300   -9999.000000   -9999.000000
56080     56080     gansu          102.9000       34.9900          100       132     2012      07        12        194              0.265625      14.141632       0.933508       0.279851       0.403000       0.259800       0.108800       0.995000
56080     56080     gansu          102.9000       34.9900          100       132     2012      07        13        195              0.247167      15.141785       0.111246       0.262014       0.387500   -9999.000000       0.103500   -9999.000000
56080     56080     gansu          102.9000       34.9900          100       132     2012      07        14        196              0.228792      18.678711       0.273662       0.248331       0.383000       0.172900       0.111200       0.748000
56080     56080     gansu          102.9000       34.9900          100       132     2012      07        15        197              0.214667      18.034943       0.000000       0.241135       0.358000   -9999.000000       0.103100       0.821000
56080     56080     gansu          102.9000       34.9900          100       132     2012      07        16        198              0.207292      18.612823       6.942237       0.233698   -9999.000000       0.221800   -9999.000000   -9999.000000
56080     56080     gansu          102.9000       34.9900          100       132     2012      07        17        199              0.258917      18.944733       7.194886       0.242432       0.450500       0.310400   -9999.000000       1.000000
56080     56080     gansu          102.9000       34.9900          100       132     2012      07        18        200              0.263042      16.655731       4.427585       0.274001       0.426000   -9999.000000       0.093300   -9999.000000
56080     56080     gansu          102.9000       34.9900          100       132     2012      07        19        201              0.273208      18.001984       5.314270       0.264878       0.402000   -9999.000000       0.096000       0.836000
56080     56080     gansu          102.9000       34.9900          100       132     2012      07        20        202              0.285042      17.679565       8.317447       0.271624       0.396000       0.256600       0.098200       1.000000
56080     56080     gansu          102.9000       34.9900          100       132     2012      07        21        203              0.291273      17.377899       5.780571       0.271743       0.500000   -9999.000000       0.098900       0.994000
56080     56080     gansu          102.9000       34.9900          100       132     2012      07        22        204              0.261833      14.499664       0.207309       0.280837       0.500000       0.159900   -9999.000000       0.917000
56080     56080     gansu          102.9000       34.9900          100       132     2012      07        23        205              0.281478      17.169373       2.133578       0.259442       0.500000       0.180700       0.088500   -9999.000000
56080     56080     gansu          102.9000       34.9900          100       132     2012      07        24        206              0.280375      18.052887       5.058665       0.256434       0.500000       0.228700       0.087700       0.983000
56080     56080     gansu          102.9000       34.9900          100       132     2012      07        25        207              0.256958      15.816132       0.000000       0.265886       0.500000       0.220900       0.091300       0.823000
56080     56080     gansu          102.9000       34.9900          100       132     2012      07        26        208              0.297750      20.184814      31.724724       0.248612   -9999.000000   -9999.000000       0.052600       0.851000
56080     56080     gansu          102.9000       34.9900          100       132     2012      07        27        209              0.277292      18.582428       1.526534       0.292387       0.500000   -9999.000000       0.093800       0.909000
56080     56080     gansu          102.9000       34.9900          100       132     2012      07        28        210              0.254292      19.262024       2.071840       0.278386       0.500000   -9999.000000   -9999.000000   -9999.000000
56080     56080     gansu          102.9000       34.9900          100       132     2012      07        29        211              0.254375      19.744202      27.059269       0.269445       0.500000       0.170100       0.098700       0.877000
56080     56080     gansu          102.9000       34.9900          100       132     2012      07        30        212              0.305833      21.826843      11.444180       0.276540   -9999.000000       0.268200       0.107000   -9999.000000
56080     56080     gansu          102.9000       34.9900          100       132     2012      07        31        213              0.295542      16.737213       3.987014       0.300268       0.500000   -9999.000000       0.108200       0.961000
56080     56080     gansu          102.9000       34.9900          100       132     2012      08        01        214              0.271958      15.046997       9.146779       0.287244       0.500000   -9999.000000       0.097800       0.809000
56080     56080     gansu          102.9000       34.9900          100       132     2012      08        02        215              0.254750      17.029236       1.536742       0.284310       0.500000   -9999.000000   -9999.000000   -9999.000000
56080     56080     gansu          102.9000       34.9900          100       132     2012      08        03        216              0.266250      18.913696       6.248124       0.269855       0.478000       0.157900       0.099900       1.000000
56080     56080     gansu          102.9000       34.9900          100       132     2012      08        04        217              0.272000      18.984497       2.246858       0.271934   -9999.000000       0.165100       0.100100   -9999.000000
56080     56080     gansu          102.9000       34.9900          100       132     2012      08        05        218              0.251958      19.177429       0.882911       0.267175   -9999.000000   -9999.000000       0.102500       0.949000
56080     56080     gansu          102.9000       34.9900          100       132     2012      08        06        219              0.234750      19.147858       1.165821       0.258666   -9999.000000       0.160400       0.124800   -9999.000000
56080     56080     gansu          102.9000       34.9900          100       132     2012      08        07        220              0.221333      19.270599       1.264790       0.253248   -9999.000000       0.366200       0.122400   -9999.000000
56080     56080     gansu          102.9000       34.9900          100       132     2012      08        08        221              0.209167      19.427979       0.900914       0.247898       0.494000   -9999.000000   -9999.000000       0.903000
56080     56080     gansu          102.9000       34.9900          100       132     2012      08        09        222              0.197083      19.108673       0.529586       0.243659       0.488000   -9999.000000       0.122000   -9999.000000
56080     56080     gansu          102.9000       34.9900          100       132     2012      08        10        223              0.185833      20.277161       5.419903       0.237519       0.488000   -9999.000000       0.123900       0.924000
56080     56080     gansu          102.9000       34.9900          100       132     2012      08        11        224              0.179333      22.135040       2.298883       0.242498       0.460000       0.171200       0.128400   -9999.000000
56080     56080     gansu          102.9000       34.9900          100       132     2012      08        12        225              0.176125      19.335815       4.367645       0.255853       0.485000       0.207500       0.119200       0.818000
56080     56080     gansu          102.9000       34.9900          100       132     2012      08        13        226              0.175042      20.029388       9.328052       0.252132   -9999.000000   -9999.000000       0.156600       1.000000
56080     56080     gansu          102.9000       34.9900          100       132     2012      08        14        227              0.188667      19.465179       1.351061       0.268595       0.484500   -9999.000000   -9999.000000       0.895000
56080     56080     gansu          102.9000       34.9900          100       132     2012      08        15        228              0.189125      17.769226       0.000000       0.266158       0.476000   -9999.000000       0.155500       0.844000
56080     56080     gansu          102.9000       34.9900          100       132     2012      08        16        229              0.230083      20.528107      24.303123       0.248317       0.482000       0.246800       0.186400   -9999.000000
56080     56080     gansu          102.9000       34.9900          100       132     2012      08        17        230              0.284875      19.404449       5.504017       0.282728   -9999.000000   -9999.000000       0.165800       0.992000
56080     56080     gansu          102.9000       34.9900          100       132     2012      08        18        231              0.274000      15.341675       2.254066       0.285307   -9999.000000   -9999.000000       0.168200       0.998000
56080     56080     gansu          102.9000       34.9900          100       132     2012      08        19        232              0.255125      14.038879       2.978783       0.276138       0.483000       0.217700   -9999.000000       0.916000
56080     56080     gansu          102.9000       34.9900          100       132     2012      08        20        233              0.239708      17.548767       1.903691       0.259304       0.489500   -9999.000000       0.183700       0.969000
56080     56080     gansu          102.9000       34.9900          100       132     2012      08        21        234              0.235625      17.798340       1.520133       0.254260       0.482000       0.337400       0.180800   -9999.000000
56080     56080     gansu          102.9000       34.9900          100       132     2012      08        22        235              0.230750      16.018036       3.172423       0.253558   -9999.000000       0.229700       0.178400   -9999.000000
56080     56080     gansu          102.9000       34.9900          100       132     2012      08        23        236              0.220750      16.240173       0.000000       0.258020       0.475000   -9999.000000       0.183500       0.769000
56080     56080     gansu          102.9000       34.9900          100       132     2012      08        24        237              0.208333      17.594879       1.045071       0.245661   -9999.000000   -9999.000000       0.185600   -9999.000000
56080     56080     gansu          102.9000       34.9900          100       132     2012      08        25        238              0.000000      16.693176       0.350244       0.243333       0.459000   -9999.000000   -9999.000000       0.551000
56080     56080     gansu          102.9000       34.9900          100       132     2012      08        26        239              0.190833      17.077881       0.306859       0.237376       0.479000   -9999.000000       0.181700   -9999.000000
56080     56080     gansu          102.9000       34.9900          100       132     2012      08        27        240              0.196083      18.204895       5.069037       0.230145       0.489000       0.236600       0.142800       0.884000
56080     56080     gansu          102.9000       34.9900          100       132     2012      08        28        241              0.199625      13.684448       0.000000       0.255311       0.481000       0.363200       0.141500   -9999.000000
56080     56080     gansu          102.9000       34.9900          100       132     2012      08        29        242              0.192250      17.198700       0.998506       0.239917       0.487000       0.244200       0.142500       0.729000
56080     56080     gansu          102.9000       34.9900          100       132     2012      08        30        243              0.198833      17.356781       5.879668       0.237684       0.487500       0.187500   -9999.000000       0.963000
56080     56080     gansu          102.9000       34.9900          100       132     2012      08        31        244              0.254958      18.068024      14.203928       0.248297       0.491000   -9999.000000   -9999.000000   -9999.000000
56080     56080     gansu          102.9000       34.9900          100       132     2012      09        01        245              0.279750      13.809937       2.439274       0.273765       0.469000   -9999.000000       0.142800       0.945000
56080     56080     gansu          102.9000       34.9900          100       132     2012      09        02        246              0.254667      14.000488       0.039128       0.274415   -9999.000000   -9999.000000       0.143200   -9999.000000
56080     56080     gansu          102.9000       34.9900          100       132     2012      09        03        247              0.237167      15.842560       0.196090       0.255993   -9999.000000       0.239100       0.164800       0.741000
56080     56080     gansu          102.9000       34.9900          100       132     2012      09        04        248              0.222917      16.805115       0.000000       0.246614       0.400500       0.244000       0.167900   -9999.000000
56080     56080     gansu          102.9000       34.9900          100       132     2012      09        05        249              0.213833      17.941345       2.575895       0.238422       0.435000   -9999.000000   -9999.000000   -9999.000000
56080     56080     gansu          102.9000       34.9900          100       132     2012      09        06        250              0.218875      17.244324       0.335802       0.241259       0.374000       0.247200       0.173000       0.665000
56080     56080     gansu          102.9000       34.9900          100       132     2012      09        07        251              0.273708      18.353577      14.766612       0.239716       0.421000   -9999.000000       0.170900   -9999.000000
56080     56080     gansu          102.9000       34.9900          100       132     2012      09        08        252              0.259792      14.539062       0.275216       0.282665       0.400000       0.264600       0.173800       0.868000
56080     56080     gansu          102.9000       34.9900          100       132     2012      09        09        253              0.246083      16.942688       0.938063       0.256773       0.459000       0.136500       0.167300   -9999.000000
56080     56080     gansu          102.9000       34.9900          100       132     2012      09        10        254              0.240250      16.902374       1.320486       0.251090       0.460000   -9999.000000       0.195800       0.815000
56080     56080     gansu          102.9000       34.9900          100       132     2012      09        11        255              0.230792      14.947876       0.205430       0.251670       0.326000   -9999.000000   -9999.000000       0.853000
56080     56080     gansu          102.9000       34.9900          100       132     2012      09        12        256              0.220917      13.988312       0.138080       0.243939       0.309000       0.243400       0.188200       0.848000
56080     56080     gansu          102.9000       34.9900          100       132     2012      09        13        257              0.211292      12.293823       0.188911       0.239784   -9999.000000   -9999.000000       0.193500       0.672000
56080     56080     gansu          102.9000       34.9900          100       132     2012      09        14        258              0.202125      12.960358       0.837574       0.234550   -9999.000000       0.230300       0.184200   -9999.000000
56080     56080     gansu          102.9000       34.9900          100       132     2012      09        15        259              0.193792      13.933380       0.232562       0.234648       0.304500   -9999.000000       0.192300       0.823000
56080     56080     gansu          102.9000       34.9900          100       132     2012      09        16        260              0.187625      14.510834       1.575343       0.229711       0.337000   -9999.000000   -9999.000000       0.829000
56080     56080     gansu          102.9000       34.9900          100       132     2012      09        17        261              0.181958      12.929169       0.120042       0.234735       0.309000       0.169400   -9999.000000       0.767000
56080     56080     gansu          102.9000       34.9900          100       132     2012      09        18        262              0.174208      14.770447       0.000000       0.230673   -9999.000000   -9999.000000       0.177900       0.658000
56080     56080     gansu          102.9000       34.9900          100       132     2012      09        19        263              0.167750      14.568817       0.442334       0.225525       0.324000       0.263600       0.202500   -9999.000000
56080     56080     gansu          102.9000       34.9900          100       132     2012      09        20        264              0.171667      16.144043       2.789437       0.222900       0.367000       0.145900       0.193800       0.770000
56080     56080     gansu          102.9000       34.9900          100       132     2012      09        21        265              0.174000      12.279968       0.534365       0.240883   -9999.000000       0.216300       0.194500       0.698000
56080     56080     gansu          102.9000       34.9900          100       132     2012      09        22        266              0.193750      15.019806      15.353767       0.230330       0.282000       0.146200   -9999.000000       0.762000
56080     56080     gansu          102.9000       34.9900          100       132     2012      09        23        267              0.243250      14.488892       6.313148       0.262741       0.299000   -9999.000000       0.216300       0.886000
56080     56080     gansu          102.9000       34.9900          100       132     2012      09        24        268              0.271750      14.932312      16.610807       0.270802   -9999.000000       0.109300       0.137900   -9999.000000
56080     56080     gansu          102.9000       34.9900          100       132     2012      09        25        269              0.286348      10.288635       5.624276       0.291589   -9999.000000   -9999.000000       0.135400       0.967000
56080     56080     gansu          102.9000       34.9900          100       132     2012      09        26        270              0.260583      10.011688       0.291187       0.288877       0.327500   -9999.000000       0.142100   -9999.000000
56080     56080     gansu          102.9000       34.9900          100       132     2012      09        27        271              0.249786      13.085480       0.098813       0.269616       0.338000   -9999.000000       0.140600       0.890000
56080     56080     gansu          102.9000       34.9900          100       132     2012      09        28        272              0.233533      11.004944       0.391818       0.260941       0.332000   -9999.000000   -9999.000000       0.840000
56080     56080     gansu          102.9000       34.9900          100       132     2012      09        29        273              0.253250      12.707733       8.299135       0.255131   -9999.000000   -9999.000000       0.133300   -9999.000000
56080     56080     gansu          102.9000       34.9900          100       132     2012      09        30        274              0.251000       9.128418       0.062787       0.275203   -9999.000000   -9999.000000       0.131600       0.904000
56080     56080     gansu          102.9000       34.9900          100       132     2012      10        01        275              0.237792      11.825836       0.278095       0.260787       0.247000   -9999.000000       0.124200   -9999.000000
56080     56080     gansu          102.9000       34.9900          100       132     2012      10        02        276              0.242667      13.507324       3.161723       0.252654       0.264000   -9999.000000       0.127800       0.946000
56080     56080     gansu          102.9000       34.9900          100       132     2012      10        03        277              0.267333       9.311798       0.932784       0.260898       0.244000   -9999.000000   -9999.000000   -9999.000000
56080     56080     gansu          102.9000       34.9900          100       132     2012      10        04        278              0.278375      11.657104       0.115053       0.255069       0.242000   -9999.000000   -9999.000000   -9999.000000
56080     56080     gansu          102.9000       34.9900          100       132     2012      10        05        279              0.258917      10.205963       0.095359       0.250367   -9999.000000   -9999.000000       0.121200       0.940000
56080     56080     gansu          102.9000       34.9900          100       132     2012      10        06        280              0.247083      10.690643       0.121568       0.246493       0.227000   -9999.000000       0.120300   -9999.000000
56080     56080     gansu          102.9000       34.9900          100       132     2012      10        07        281              0.241417      10.971680       3.362573       0.244675   -9999.000000   -9999.000000       0.127500       0.973000
56080     56080     gansu          102.9000       34.9900          100       132     2012      10        08        282              0.258542      10.652191       4.965179       0.253275   -9999.000000   -9999.000000       0.128900   -9999.000000
56080     56080     gansu          102.9000       34.9900          100       132     2012      10        09        283              0.252292       7.221252       1.160121       0.266133       0.256000   -9999.000000   -9999.000000       0.882000
56080     56080     gansu          102.9000       34.9900          100       132     2012      10        10        284              0.241750       8.689789       1.059838       0.257636       0.255000       0.278200       0.123900       0.913000
56080     56080     gansu          102.9000       34.9900          100       132     2012      10        11        285              0.234000       9.898590       0.650469       0.253180   -9999.000000   -9999.000000       0.114700       0.807000
56080     56080     gansu          102.9000       34.9900          100       132     2012      10        12        286              0.228458       8.651886       0.165563       0.251317       0.178000   -9999.000000       0.122900       0.696000
56080     56080     gansu          102.9000       34.9900          100       132     2012      10        13        287              0.222958       9.217010       0.261175       0.247008   -9999.000000   -9999.000000       0.131000   -9999.000000
56080     56080     gansu          102.9000       34.9900          100       132     2012      10        14        288              0.219000       9.218048       3.038033       0.245550       0.194000   -9999.000000       0.144000       0.841000
56080     56080     gansu          102.9000       34.9900          100       132     2012      10        15        289              0.231125      10.766083       2.808789       0.247671   -9999.000000   -9999.000000   -9999.000000       0.893000
56080     56080     gansu          102.9000       34.9900          100       132     2012      10        16        290              0.225750       9.212189       2.519892       0.259990   -9999.000000   -9999.000000       0.101800       0.803000
56080     56080     gansu          102.9000       34.9900          100       132     2012      10        17        291              0.218167       7.645111       0.875401       0.249248       0.212000       0.255100       0.101700       0.716000
56080     56080     gansu          102.9000       34.9900          100       132     2012      10        18        292              0.216000       8.554535       0.423945       0.253370       0.191000       0.168400       0.104600   -9999.000000
56080     56080     gansu          102.9000       34.9900          100       132     2012      10        19        293              0.212292       7.352478       0.171013       0.251731       0.189000   -9999.000000       0.111100       0.798000
56080     56080     gansu          102.9000       34.9900          100       132     2012      10        20        294              0.208071       8.977325       0.049940       0.246201       0.181000   -9999.000000   -9999.000000       0.791000
56080     56080     gansu          102.9000       34.9900          100       132     2012      10        21        295              0.200889       9.245178       0.703555       0.242504   -9999.000000   -9999.000000       0.097400       0.748000
56080     56080     gansu          102.9000       34.9900          100       132     2012      10        22        296              0.199375       5.680511       0.211300       0.238800   -9999.000000       0.281900       0.095400       0.719000
56080     56080     gansu          102.9000       34.9900          100       132     2012      10        23        297              0.203375       6.362732       0.000000       0.237765   -9999.000000       0.133800       0.091500   -9999.000000
56080     56080     gansu          102.9000       34.9900          100       132     2012      10        24        298              0.205824       5.461823       0.000000       0.237429   -9999.000000   -9999.000000       0.103200       0.749000
56080     56080     gansu          102.9000       34.9900          100       132     2012      10        25        299              0.000000       6.147308       1.814687       0.235500       0.187000   -9999.000000       0.088900   -9999.000000
56080     56080     gansu          102.9000       34.9900          100       132     2012      10        26        300              0.000000       5.613495       0.299984       0.239281   -9999.000000       0.248500   -9999.000000       0.696000
56080     56080     gansu          102.9000       34.9900          100       132     2012      10        27        301              0.000000       5.243927       0.000000       0.235739   -9999.000000       0.375200       0.091400       0.733000
56080     56080     gansu          102.9000       34.9900          100       132     2012      10        28        302              0.000000       6.080597       7.573475       0.235503   -9999.000000       0.126700       0.096100   -9999.000000
56080     56080     gansu          102.9000       34.9900          100       132     2012      10        29        303              0.000000       6.412506       0.572278       0.245813       0.181000   -9999.000000       0.092200       0.739000
56080     56080     gansu          102.9000       34.9900          100       132     2012      10        30        304              0.000000       4.874786      16.759815       0.261651       0.196000       0.093100       0.086900   -9999.000000
56080     56080     gansu          102.9000       34.9900          100       132     2012      10        31        305              0.000000       4.356873       0.294104       0.230599       0.191000       0.213700   -9999.000000       0.651000
56080     56080     gansu          102.9000       34.9900          100       132     2012      11        01        306              0.000000       4.076324       0.906852       0.228199   -9999.000000       0.198100   -9999.000000   -9999.000000
56080     56080     gansu          102.9000       34.9900          100       132     2012      11        02        307              0.000000       3.498657       0.194819       0.220427   -9999.000000       0.106200       0.074800   -9999.000000
56080     56080     gansu          102.9000       34.9900          100       132     2012      11        03        308              0.000000       3.327820       1.364700       0.204845       0.179000   -9999.000000       0.079000       0.461000
56080     56080     gansu          102.9000       34.9900          100       132     2012      11        04        309              0.000000       0.820801       1.148069       0.171612       0.176000       0.143700       0.084500   -9999.000000
56080     56080     gansu          102.9000       34.9900          100       132     2012      11        05        310              0.000000       1.958618       0.000000       0.183624       0.170000       0.084800       0.085200       0.525000
56080     56080     gansu          102.9000       34.9900          100       132     2012      11        06        311              0.000000       2.618988       0.056622       0.192870   -9999.000000   -9999.000000   -9999.000000   -9999.000000
56080     56080     gansu          102.9000       34.9900          100       132     2012      11        07        312              0.000000       2.269684       0.060057       0.195936   -9999.000000   -9999.000000       0.074700       0.306000
56080     56080     gansu          102.9000       34.9900          100       132     2012      11        08        313              0.000000       1.166351       0.168698       0.177606       0.176000       0.087700       0.071400       0.436000
56080     56080     gansu          102.9000       34.9900          100       132     2012      11        09        314              0.000000       2.553558       0.278172       0.190050       0.173000       0.135500       0.078400       0.433000
56080     56080     gansu          102.9000       34.9900          100       132     2012      11        10        315              0.000000       2.017975       0.346183       0.191647       0.171000       0.091500       0.081900       0.388000
56080     56080     gansu          102.9000       34.9900          100       132     2012      11        11        316              0.000000       0.360596       0.230889       0.159733   -9999.000000   -9999.000000       0.085200   -9999.000000
56080     56080     gansu          102.9000       34.9900          100       132     2012      11        12        317              0.000000       0.923920       0.000000       0.165606   -9999.000000       0.097100   -9999.000000       0.453000
56080     56080     gansu          102.9000       34.9900          100       132     2012      11        13        318              0.000000       1.311066       0.000000       0.168357       0.152000       0.082600       0.069200       0.439000
56080     56080     gansu          102.9000       34.9900          100       132     2012      11        14        319              0.000000       2.319946       0.119447       0.179480       0.153000       0.238200       0.070100       0.508000
56080     56080     gansu          102.9000       34.9900          100       132     2012      11        15        320              0.000000       2.659821       0.473324       0.187830       0.133000   -9999.000000       0.075000       0.234000
56080     56080     gansu          102.9000       34.9900          100       132     2012      11        16        321              0.000000       0.742035       0.214023       0.167558       0.137000   -9999.000000       0.079200   -9999.000000
56080     56080     gansu          102.9000       34.9900          100       132     2012      11        17        322              0.000000       0.824310       0.070498       0.161051   -9999.000000       0.108500   -9999.000000       0.269000
56080     56080     gansu          102.9000       34.9900          100       132     2012      11        18        323              0.000000       1.754974       0.000000       0.169375   -9999.000000       0.076600   -9999.000000       0.286000
56080     56080     gansu          102.9000       34.9900          100       132     2012      11        19        324              0.120875       0.982666       0.000000       0.162189       0.147000       0.128200       0.059700       0.382000
56080     56080     gansu          102.9000       34.9900          100       132     2012      11        20        325              0.125750       0.829102       0.050432       0.161157       0.131000   -9999.000000       0.063100       0.308000
56080     56080     gansu          102.9000       34.9900          100       132     2012      11        21        326              0.129667       1.676086       0.030922       0.176862       0.122000   -9999.000000       0.065900   -9999.000000
56080     56080     gansu          102.9000       34.9900          100       132     2012      11        22        327              0.119125       1.780914       1.888820       0.178205   -9999.000000   -9999.000000       0.063300       0.191000
56080     56080     gansu          102.9000       34.9900          100       132     2012      11        23        328              0.109042      -2.167603       0.507465       0.115512   -9999.000000   -9999.000000   -9999.000000   -9999.000000
56080     56080     gansu          102.9000       34.9900          100       132     2012      11        24        329              0.103000      -1.455597       0.044451       0.123810   -9999.000000   -9999.000000       0.060400       0.226000
56080     56080     gansu          102.9000       34.9900          100       132     2012      11        25        330              0.100792      -2.193604       1.301542       0.112055   -9999.000000       0.094800       0.052700       0.136000
56080     56080     gansu          102.9000       34.9900          100       132     2012      11        26        331              0.092333      -5.064728       0.512007       0.088424   -9999.000000       0.133400       0.050600   -9999.000000
56080     56080     gansu          102.9000       34.9900          100       132     2012      11        27        332              0.086917      -3.884949       0.066831       0.098871   -9999.000000       0.122600       0.057400       0.143000
56080     56080     gansu          102.9000       34.9900          100       132     2012      11        28        333              0.087750      -3.495697       0.084277       0.101670   -9999.000000   -9999.000000       0.052800   -9999.000000
56080     56080     gansu          102.9000       34.9900          100       132     2012      11        29        334              0.088708      -2.337738       0.080431       0.114211   -9999.000000   -9999.000000   -9999.000000       0.129000
56080     56080     gansu          102.9000       34.9900          100       132     2012      11        30        335              0.091708      -1.865173       0.051175       0.123788       0.137000   -9999.000000       0.052300   -9999.000000
56080     56080     gansu          102.9000       34.9900          100       132     2012      12        01        336              0.091042      -1.334137       0.200018       0.128010       0.126000       0.085900       0.054200   -9999.000000
56080     56080     gansu          102.9000       34.9900          100       132     2012      12        02        337              0.087458      -2.187775       0.083175       0.119761   -9999.000000   -9999.000000       0.049900       0.175000
56080     56080     gansu          102.9000       34.9900          100       132     2012      12        03        338              0.087500      -1.393616       0.030938       0.126853   -9999.000000   -9999.000000       0.055800   -9999.000000
56080     56080     gansu          102.9000       34.9900          100       132     2012      12        04        339              0.086125      -1.803802       0.079719       0.125942   -9999.000000   -9999.000000   -9999.000000       0.175000
56080     56080     gansu          102.9000       34.9900          100       132     2012      12        05        340              0.084958      -2.031921       0.253480       0.118263       0.126000       0.076900       0.057700   -9999.000000
56080     56080     gansu          102.9000       34.9900          100       132     2012      12        06        341              0.085167      -1.943665       0.113873       0.121985   -9999.000000       0.105000       0.053600       0.222000
56080     56080     gansu          102.9000       34.9900          100       132     2012      12        07        342              0.084083      -1.192474       0.381292       0.130041       0.121000       0.085500       0.058100       0.107000
56080     56080     gansu          102.9000       34.9900          100       132     2012      12        08        343              0.081792      -1.675598       1.041610       0.126952   -9999.000000   -9999.000000       0.054700       0.148000
56080     56080     gansu          102.9000       34.9900          100       132     2012      12        09        344              0.081250      -2.329224       0.504630       0.119565   -9999.000000   -9999.000000       0.059700       0.115000
56080     56080     gansu          102.9000       34.9900          100       132     2012      12        10        345              0.081792      -1.938568       1.323827       0.121220       0.128000   -9999.000000   -9999.000000   -9999.000000
56080     56080     gansu          102.9000       34.9900          100       132     2012      12        11        346              0.081917      -2.030609       0.068971       0.119344       0.121000   -9999.000000       0.059700       0.120000
56080     56080     gansu          102.9000       34.9900          100       132     2012      12        12        347              0.081750      -1.848480       0.261649       0.123530       0.113000   -9999.000000       0.056900       0.164000
56080     56080     gansu          102.9000       34.9900          100       132     2012      12        13        348              0.083292      -1.035614       2.714363       0.126857   -9999.000000       0.096300       0.058800       0.231000
56080     56080     gansu          102.9000       34.9900          100       132     2012      12        14        349              0.083458      -0.718475       0.165009       0.133027   -9999.000000   -9999.000000       0.061000       0.098000
56080     56080     gansu          102.9000       34.9900          100       132     2012      12        15        350              0.000000      -0.916809       0.000000       0.130381   -9999.000000   -9999.000000   -9999.000000   -9999.000000
56080     56080     gansu          102.9000       34.9900          100       132     2012      12        16        351              0.082542      -0.790619       0.000000       0.133588       0.123000   -9999.000000   -9999.000000       0.062000
56080     56080     gansu          102.9000       34.9900          100       132     2012      12        17        352              0.081833      -0.814880       0.000000       0.132823       0.107000   -9999.000000       0.062500       0.034000
56080     56080     gansu          102.9000       34.9900          100       132     2012      12        18        353              0.082708      -3.374023       0.000000       0.104555       0.110000       0.073000       0.069100       0.103000
56080     56080     gansu          102.9000       34.9900          100       132     2012      12        19        354              0.084167      -1.237640       0.000000       0.123034   -9999.000000   -9999.000000       0.063200       0.034000
56080     56080     gansu          102.9000       34.9900          100       132     2012      12        20        355              0.000000      -1.248871       0.046947       0.124395   -9999.000000   -9999.000000       0.063000   -9999.000000
56080     56080     gansu          102.9000       34.9900          100       132     2012      12        21        356              0.081167      -4.863251       0.069092       0.083689   -9999.000000   -9999.000000   -9999.000000       0.019000
56080     56080     gansu          102.9000       34.9900          100       132     2012      12        22        357              0.078792      -6.231903       0.349448       0.082850   -9999.000000   -9999.000000       0.065400   -9999.000000
56080     56080     gansu          102.9000       34.9900          100       132     2012      12        23        358              0.077417      -7.468170       0.125145       0.080969       0.116000   -9999.000000       0.058800       0.023000
56080     56080     gansu          102.9000       34.9900          100       132     2012      12        24        359              0.077421      -4.225250       1.365326       0.098457       0.113000   -9999.000000       0.057100       0.037000
56080     56080     gansu          102.9000       34.9900          100       132     2012      12        25        360              0.078000      -2.733429       0.116442       0.117515   -9999.000000   -9999.000000       0.051600   -9999.000000
56080     56080     gansu          102.9000       34.9900          100       132     2012      12        26        361              0.000000      -5.122559       0.195511       0.086572   -9999.000000   -9999.000000       0.059500       0.023000
56080     56080     gansu          102.9000       34.9900          100       132     2012      12        27        362              0.077167      -5.204559       0.000000       0.090445       0.124000   -9999.000000   -9999.000000   -9999.000000
56080     56080     gansu          102.9000       34.9900          100       132     2012      12        28        363              0.000000      -3.451599       0.042239       0.106886   -9999.000000   -9999.000000       0.053100       0.011000
56080     56080     gansu          102.9000       34.9900          100       132     2012      12        29        364              0.000000      -8.699432       0.268786       0.077233   -9999.000000   -9999.000000       0.055300   -9999.000000
56080     56080     gansu          102.9000       34.9900          100       132     2012      12        30        365              0.000000     -10.881958       0.000000       0.070831   -9999.000000   -9999.000000       0.053400   -9999.000000
56080     56080     gansu          102.9000       34.9900          100       132     2012      12        31        366              0.072867      -9.409485       0.000000       0.071671   -9999.000000   -9999.000000       0.062800       0.012000
