# Supplementary material for: Research on Fusing Multisatellite Soil Moisture Data Based on Bayesian Model Averaging
Source: Hindawi journal article supplement (doi:10.1155/2018/9310838), 2018-06-25
Supplement: f1 [file 9310838.f1.zip › 2012_sm00-10cm_daily_ZDB_ZHY_56093_366days_allin.txt]

56093     56093     gansu          104.0200       34.4300          102       136     2012      01        01        001              0.000000   -9999.000000       0.000000   -9999.000000       0.111000       0.108800   -9999.000000   -9999.000000
56093     56093     gansu          104.0200       34.4300          102       136     2012      01        02        002              0.071333      -2.892181       0.000000       0.147075   -9999.000000   -9999.000000       0.036300   -9999.000000
56093     56093     gansu          104.0200       34.4300          102       136     2012      01        03        003              0.000000      -4.153870       0.157025       0.133545   -9999.000000       0.022900       0.034200       0.004000
56093     56093     gansu          104.0200       34.4300          102       136     2012      01        04        004              0.063375      -6.444702       0.242578       0.119186   -9999.000000   -9999.000000       0.033900       0.070000
56093     56093     gansu          104.0200       34.4300          102       136     2012      01        05        005              0.062208      -5.785675       0.469309       0.120170       0.122000   -9999.000000       0.034200       0.044000
56093     56093     gansu          104.0200       34.4300          102       136     2012      01        06        006              0.061364      -3.340973       0.784757       0.138472   -9999.000000       0.045400       0.034200       0.005000
56093     56093     gansu          104.0200       34.4300          102       136     2012      01        07        007              0.063435      -2.700500       1.961733       0.149981   -9999.000000   -9999.000000   -9999.000000   -9999.000000
56093     56093     gansu          104.0200       34.4300          102       136     2012      01        08        008              0.000000      -3.443176       0.228587       0.137793   -9999.000000   -9999.000000       0.035400       0.003000
56093     56093     gansu          104.0200       34.4300          102       136     2012      01        09        009              0.065708      -2.918518       0.936100       0.142760   -9999.000000   -9999.000000   -9999.000000       0.056000
56093     56093     gansu          104.0200       34.4300          102       136     2012      01        10        010              0.063250      -2.960114       1.074927       0.141968   -9999.000000   -9999.000000   -9999.000000       0.028000
56093     56093     gansu          104.0200       34.4300          102       136     2012      01        11        011              0.062000      -4.507019       0.905959       0.127706   -9999.000000   -9999.000000       0.027300       0.007000
56093     56093     gansu          104.0200       34.4300          102       136     2012      01        12        012              0.062333      -4.686859       0.149651       0.128347   -9999.000000   -9999.000000   -9999.000000   -9999.000000
56093     56093     gansu          104.0200       34.4300          102       136     2012      01        13        013              0.062625      -2.925323       0.185681       0.142367   -9999.000000   -9999.000000       0.024500       0.028000
56093     56093     gansu          104.0200       34.4300          102       136     2012      01        14        014              0.060083      -3.604523       0.000000       0.134127   -9999.000000   -9999.000000       0.029800   -9999.000000
56093     56093     gansu          104.0200       34.4300          102       136     2012      01        15        015              0.058174      -3.964905       0.000000       0.136595   -9999.000000   -9999.000000       0.024900       0.007000
56093     56093     gansu          104.0200       34.4300          102       136     2012      01        16        016              0.058708      -3.611115       0.000000       0.139153   -9999.000000   -9999.000000       0.026700   -9999.000000
56093     56093     gansu          104.0200       34.4300          102       136     2012      01        17        017              0.000000      -2.666534       0.000000       0.147553   -9999.000000   -9999.000000       0.023300   -9999.000000
56093     56093     gansu          104.0200       34.4300          102       136     2012      01        18        018              0.060917      -3.553772       0.000000       0.136970   -9999.000000   -9999.000000   -9999.000000       0.025000
56093     56093     gansu          104.0200       34.4300          102       136     2012      01        19        019              0.062083      -3.076843       0.452264       0.140328   -9999.000000   -9999.000000       0.027600   -9999.000000
56093     56093     gansu          104.0200       34.4300          102       136     2012      01        20        020              0.060167      -4.494476       0.466460       0.126524   -9999.000000   -9999.000000       0.026700       0.005000
56093     56093     gansu          104.0200       34.4300          102       136     2012      01        21        021              0.057375      -5.441437       0.682735       0.122230   -9999.000000   -9999.000000       0.021500   -9999.000000
56093     56093     gansu          104.0200       34.4300          102       136     2012      01        22        022              0.054913      -6.494415       0.845886       0.117538   -9999.000000   -9999.000000       0.021200   -9999.000000
56093     56093     gansu          104.0200       34.4300          102       136     2012      01        23        023              0.053609      -6.504333       6.131412       0.116880   -9999.000000   -9999.000000       0.018200       0.058000
56093     56093     gansu          104.0200       34.4300          102       136     2012      01        24        024              0.051333      -6.923889       0.000000       0.116902   -9999.000000   -9999.000000   -9999.000000   -9999.000000
56093     56093     gansu          104.0200       34.4300          102       136     2012      01        25        025              0.050250      -7.041687       0.430279       0.116209   -9999.000000   -9999.000000       0.021600       0.056000
56093     56093     gansu          104.0200       34.4300          102       136     2012      01        26        026              0.051917      -5.779877       0.860351       0.121007   -9999.000000   -9999.000000       0.017300   -9999.000000
56093     56093     gansu          104.0200       34.4300          102       136     2012      01        27        027              0.054542      -4.216248       0.192121       0.135891   -9999.000000   -9999.000000       0.022000   -9999.000000
56093     56093     gansu          104.0200       34.4300          102       136     2012      01        28        028              0.059750      -3.406281       0.686193       0.142577   -9999.000000   -9999.000000       0.017800       0.103000
56093     56093     gansu          104.0200       34.4300          102       136     2012      01        29        029              0.063667      -2.766907       0.483927       0.147069   -9999.000000   -9999.000000   -9999.000000   -9999.000000
56093     56093     gansu          104.0200       34.4300          102       136     2012      01        30        030              0.062583      -2.902161       0.000000       0.144636   -9999.000000   -9999.000000       0.013600       0.089000
56093     56093     gansu          104.0200       34.4300          102       136     2012      01        31        031              0.061833      -2.093689       0.000000       0.161118   -9999.000000   -9999.000000       0.017800   -9999.000000
56093     56093     gansu          104.0200       34.4300          102       136     2012      02        01        032              0.062667      -1.367157       0.000000       0.175391   -9999.000000   -9999.000000       0.016100       0.177000
56093     56093     gansu          104.0200       34.4300          102       136     2012      02        02        033              0.067708      -1.281433       0.000000       0.168927   -9999.000000   -9999.000000       0.020400       0.130000
56093     56093     gansu          104.0200       34.4300          102       136     2012      02        03        034              0.064458      -1.703613       0.000000       0.167155   -9999.000000   -9999.000000       0.014800       0.084000
56093     56093     gansu          104.0200       34.4300          102       136     2012      02        04        035              0.067958      -1.075684       0.000000       0.173464   -9999.000000   -9999.000000   -9999.000000       0.118000
56093     56093     gansu          104.0200       34.4300          102       136     2012      02        05        036              0.073792       0.127747       0.000000       0.193031   -9999.000000   -9999.000000       0.017100   -9999.000000
56093     56093     gansu          104.0200       34.4300          102       136     2012      02        06        037              0.080333       0.591644       0.237932       0.202848   -9999.000000   -9999.000000       0.016500       0.097000
56093     56093     gansu          104.0200       34.4300          102       136     2012      02        07        038              0.073375      -1.906982       0.273857       0.164627   -9999.000000   -9999.000000       0.010000       0.153000
56093     56093     gansu          104.0200       34.4300          102       136     2012      02        08        039              0.074792      -2.487396       0.000000       0.156055   -9999.000000   -9999.000000       0.014300       0.046000
56093     56093     gansu          104.0200       34.4300          102       136     2012      02        09        040              0.068091      -1.962677       0.917794       0.161300   -9999.000000   -9999.000000   -9999.000000       0.076000
56093     56093     gansu          104.0200       34.4300          102       136     2012      02        10        041              0.065792      -4.815094       0.634035       0.131688   -9999.000000   -9999.000000   -9999.000000   -9999.000000
56093     56093     gansu          104.0200       34.4300          102       136     2012      02        11        042              0.071917      -2.760590       0.000000       0.149613       0.111000   -9999.000000       0.020000       0.132000
56093     56093     gansu          104.0200       34.4300          102       136     2012      02        12        043              0.074792      -0.835175       0.334698       0.176202   -9999.000000   -9999.000000       0.017200   -9999.000000
56093     56093     gansu          104.0200       34.4300          102       136     2012      02        13        044              0.079417      -1.404846       0.000000       0.164491   -9999.000000   -9999.000000       0.022500       0.129000
56093     56093     gansu          104.0200       34.4300          102       136     2012      02        14        045              0.091125      -0.352783      10.150908       0.181294   -9999.000000   -9999.000000   -9999.000000       0.111000
56093     56093     gansu          104.0200       34.4300          102       136     2012      02        15        046              0.092125      -0.096954       2.125103       0.189500   -9999.000000   -9999.000000   -9999.000000   -9999.000000
56093     56093     gansu          104.0200       34.4300          102       136     2012      02        16        047              0.082261      -1.641327       0.876417       0.168089   -9999.000000   -9999.000000       0.010000       0.222000
56093     56093     gansu          104.0200       34.4300          102       136     2012      02        17        048              0.075042      -2.218445       0.000000       0.157241   -9999.000000   -9999.000000       0.013700   -9999.000000
56093     56093     gansu          104.0200       34.4300          102       136     2012      02        18        049              0.067125      -4.008148       0.000000       0.131444   -9999.000000   -9999.000000       0.010000       0.161000
56093     56093     gansu          104.0200       34.4300          102       136     2012      02        19        050              0.069083      -3.053802       0.095541       0.143758   -9999.000000   -9999.000000       0.030200   -9999.000000
56093     56093     gansu          104.0200       34.4300          102       136     2012      02        20        051              0.081792      -0.008606       0.000000       0.188380   -9999.000000   -9999.000000       0.026200   -9999.000000
56093     56093     gansu          104.0200       34.4300          102       136     2012      02        21        052              0.105292       1.405853       0.198404       0.215878       0.101000   -9999.000000   -9999.000000       0.352000
56093     56093     gansu          104.0200       34.4300          102       136     2012      02        22        053              0.119625       3.097748       0.000000       0.237659       0.090000   -9999.000000       0.015100   -9999.000000
56093     56093     gansu          104.0200       34.4300          102       136     2012      02        23        054              0.135083       1.746796       0.000000       0.224701       0.092000   -9999.000000       0.011300       0.365000
56093     56093     gansu          104.0200       34.4300          102       136     2012      02        24        055              0.134542       2.278625       0.000000       0.229281   -9999.000000   -9999.000000       0.017900   -9999.000000
56093     56093     gansu          104.0200       34.4300          102       136     2012      02        25        056              0.108208      -1.014130       0.234993       0.169277   -9999.000000   -9999.000000       0.014500       0.185000
56093     56093     gansu          104.0200       34.4300          102       136     2012      02        26        057              0.098708      -1.234772       0.000000       0.166295   -9999.000000   -9999.000000   -9999.000000       0.273000
56093     56093     gansu          104.0200       34.4300          102       136     2012      02        27        058              0.117958       0.454529       0.000000       0.197603       0.103000   -9999.000000   -9999.000000   -9999.000000
56093     56093     gansu          104.0200       34.4300          102       136     2012      02        28        059              0.151565       2.034180       0.000000       0.220892       0.093000   -9999.000000   -9999.000000       0.352000
56093     56093     gansu          104.0200       34.4300          102       136     2012      02        29        060              0.000000   -9999.000000       0.000000   -9999.000000   -9999.000000   -9999.000000   -9999.000000   -9999.000000
56093     56093     gansu          104.0200       34.4300          102       136     2012      03        01        061              0.196208       2.978180       1.802654       0.235701   -9999.000000   -9999.000000       0.035300       0.509000
56093     56093     gansu          104.0200       34.4300          102       136     2012      03        02        062              0.199545       2.151337       0.000000       0.239393       0.132000   -9999.000000       0.034900       0.425000
56093     56093     gansu          104.0200       34.4300          102       136     2012      03        03        063              0.203500       2.828918       0.438908       0.244141       0.123000   -9999.000000   -9999.000000       0.378000
56093     56093     gansu          104.0200       34.4300          102       136     2012      03        04        064              0.208083       2.643951       3.563362       0.244671       0.105000   -9999.000000       0.012000       0.377000
56093     56093     gansu          104.0200       34.4300          102       136     2012      03        05        065              0.205087       3.877380       0.131721       0.263866   -9999.000000   -9999.000000       0.020500   -9999.000000
56093     56093     gansu          104.0200       34.4300          102       136     2012      03        06        066              0.220174       1.048889       1.880506       0.223342   -9999.000000   -9999.000000       0.010900       0.357000
56093     56093     gansu          104.0200       34.4300          102       136     2012      03        07        067              0.000000       1.637848       1.326544       0.228855   -9999.000000   -9999.000000       0.029800       0.315000
56093     56093     gansu          104.0200       34.4300          102       136     2012      03        08        068              0.238652       0.918152       1.229412       0.218614   -9999.000000   -9999.000000       0.025500       0.453000
56093     56093     gansu          104.0200       34.4300          102       136     2012      03        09        069              0.237318       0.185120       1.539039       0.200828       0.104000   -9999.000000   -9999.000000       0.302000
56093     56093     gansu          104.0200       34.4300          102       136     2012      03        10        070              0.237792       1.143341       2.571330       0.218947       0.097000   -9999.000000       0.019600   -9999.000000
56093     56093     gansu          104.0200       34.4300          102       136     2012      03        11        071              0.236625       1.945038       0.381420       0.237674   -9999.000000   -9999.000000       0.016800       0.475000
56093     56093     gansu          104.0200       34.4300          102       136     2012      03        12        072              0.235087       2.781952       0.615399       0.255466   -9999.000000   -9999.000000       0.038000   -9999.000000
56093     56093     gansu          104.0200       34.4300          102       136     2012      03        13        073              0.236417       4.143982       0.858141       0.267421       0.118000   -9999.000000       0.041800       0.549000
56093     56093     gansu          104.0200       34.4300          102       136     2012      03        14        074              0.234167       6.427277       0.000000       0.280452       0.114000   -9999.000000   -9999.000000       0.571000
56093     56093     gansu          104.0200       34.4300          102       136     2012      03        15        075              0.231609       6.649872       0.374162       0.279269       0.101000   -9999.000000   -9999.000000   -9999.000000
56093     56093     gansu          104.0200       34.4300          102       136     2012      03        16        076              0.230773       4.640869       0.000000       0.274372   -9999.000000   -9999.000000       0.027400       0.555000
56093     56093     gansu          104.0200       34.4300          102       136     2012      03        17        077              0.229833       6.246613       0.000000       0.272695   -9999.000000   -9999.000000       0.022500   -9999.000000
56093     56093     gansu          104.0200       34.4300          102       136     2012      03        18        078              0.229227       7.744171       0.262095       0.274393       0.121000   -9999.000000       0.039600       0.489000
56093     56093     gansu          104.0200       34.4300          102       136     2012      03        19        079              0.229250       8.326752       0.000000       0.273703       0.110000       0.038200       0.048600   -9999.000000
56093     56093     gansu          104.0200       34.4300          102       136     2012      03        20        080              0.228542       9.339661       0.000000       0.271805       0.101000   -9999.000000   -9999.000000   -9999.000000
56093     56093     gansu          104.0200       34.4300          102       136     2012      03        21        081              0.225870       9.787445       0.000000       0.271585   -9999.000000   -9999.000000       0.033000       0.469000
56093     56093     gansu          104.0200       34.4300          102       136     2012      03        22        082              0.224542       4.172272       1.359014       0.260164   -9999.000000   -9999.000000       0.034400   -9999.000000
56093     56093     gansu          104.0200       34.4300          102       136     2012      03        23        083              0.225083       1.455200       0.000000       0.231706       0.125000   -9999.000000       0.033400       0.394000
56093     56093     gansu          104.0200       34.4300          102       136     2012      03        24        084              0.225375       4.392761       0.000000       0.247918       0.117000   -9999.000000       0.048600   -9999.000000
56093     56093     gansu          104.0200       34.4300          102       136     2012      03        25        085              0.000000       7.200806       0.000000       0.262093       0.114000   -9999.000000       0.047600       0.605000
56093     56093     gansu          104.0200       34.4300          102       136     2012      03        26        086              0.225000       8.465118       0.000000       0.264534       0.097000   -9999.000000   -9999.000000       0.610000
56093     56093     gansu          104.0200       34.4300          102       136     2012      03        27        087              0.225083       9.583832       2.148399       0.263237   -9999.000000   -9999.000000       0.062900   -9999.000000
56093     56093     gansu          104.0200       34.4300          102       136     2012      03        28        088              0.224083      11.333588       0.393581       0.265988   -9999.000000   -9999.000000       0.046800       0.640000
56093     56093     gansu          104.0200       34.4300          102       136     2012      03        29        089              0.224125       9.159882       0.498066       0.275705       0.122000   -9999.000000       0.052300   -9999.000000
56093     56093     gansu          104.0200       34.4300          102       136     2012      03        30        090              0.221917       9.305847       0.161501       0.268827       0.122000   -9999.000000       0.053400       0.650000
56093     56093     gansu          104.0200       34.4300          102       136     2012      03        31        091              0.223167       4.938202       0.809647       0.257445       0.112000   -9999.000000   -9999.000000       0.642000
56093     56093     gansu          104.0200       34.4300          102       136     2012      04        01        092              0.222625       8.744019       0.000000       0.262099   -9999.000000       0.126400   -9999.000000       0.664000
56093     56093     gansu          104.0200       34.4300          102       136     2012      04        02        093              0.221750       9.661926       0.000000       0.262431   -9999.000000   -9999.000000       0.047300       0.400000
56093     56093     gansu          104.0200       34.4300          102       136     2012      04        03        094              0.222833       9.294495       0.000000       0.258686       0.098000       0.084700       0.049000   -9999.000000
56093     56093     gansu          104.0200       34.4300          102       136     2012      04        04        095              0.222792      11.848022       0.000000       0.254467       0.108000   -9999.000000       0.046300       0.522000
56093     56093     gansu          104.0200       34.4300          102       136     2012      04        05        096              0.220833      12.818573       0.000000       0.251245       0.105000   -9999.000000       0.051400       0.623000
56093     56093     gansu          104.0200       34.4300          102       136     2012      04        06        097              0.217375      11.327179       0.172823       0.250987   -9999.000000   -9999.000000   -9999.000000       0.510000
56093     56093     gansu          104.0200       34.4300          102       136     2012      04        07        098              0.218500       6.515594       0.000000       0.255934   -9999.000000   -9999.000000       0.047800       0.372000
56093     56093     gansu          104.0200       34.4300          102       136     2012      04        08        099              0.217417      10.476532       0.195878       0.253241       0.094500       0.106400       0.049100   -9999.000000
56093     56093     gansu          104.0200       34.4300          102       136     2012      04        09        100              0.216042      12.976471       0.000000       0.248673       0.099000   -9999.000000       0.054300       0.484000
56093     56093     gansu          104.0200       34.4300          102       136     2012      04        10        101              0.216167      12.527496       0.403825       0.245884       0.097000   -9999.000000       0.056200   -9999.000000
56093     56093     gansu          104.0200       34.4300          102       136     2012      04        11        102              0.221375      14.081635       1.929102       0.242505       0.103000   -9999.000000       0.067500       0.734000
56093     56093     gansu          104.0200       34.4300          102       136     2012      04        12        103              0.224583      11.490356       0.307517       0.253377   -9999.000000   -9999.000000   -9999.000000       0.321000
56093     56093     gansu          104.0200       34.4300          102       136     2012      04        13        104              0.222500       8.662018       0.435438       0.253204       0.116000   -9999.000000       0.063100   -9999.000000
56093     56093     gansu          104.0200       34.4300          102       136     2012      04        14        105              0.222125      12.015350       1.699098       0.247815       0.116000   -9999.000000       0.065600       0.565000
56093     56093     gansu          104.0200       34.4300          102       136     2012      04        15        106              0.234542      11.210083       0.301518       0.255160       0.136000   -9999.000000       0.067700   -9999.000000
56093     56093     gansu          104.0200       34.4300          102       136     2012      04        16        107              0.229542      10.112213       0.707817       0.259885   -9999.000000   -9999.000000       0.066700       0.894000
56093     56093     gansu          104.0200       34.4300          102       136     2012      04        17        108              0.234750       7.539642       1.649311       0.262671   -9999.000000   -9999.000000   -9999.000000   -9999.000000
56093     56093     gansu          104.0200       34.4300          102       136     2012      04        18        109              0.231375       9.188629       0.556944       0.258374   -9999.000000   -9999.000000   -9999.000000   -9999.000000
56093     56093     gansu          104.0200       34.4300          102       136     2012      04        19        110              0.226292      12.363586       0.152680       0.251070       0.108000   -9999.000000       0.060900       0.761000
56093     56093     gansu          104.0200       34.4300          102       136     2012      04        20        111              0.227875       8.332642       0.101812       0.254196       0.114000   -9999.000000       0.050900   -9999.000000
56093     56093     gansu          104.0200       34.4300          102       136     2012      04        21        112              0.224333      11.881805       0.792772       0.249676       0.113000       0.100300       0.052100       0.546000
56093     56093     gansu          104.0200       34.4300          102       136     2012      04        22        113              0.222500      13.251526       0.000000       0.243590   -9999.000000   -9999.000000   -9999.000000   -9999.000000
56093     56093     gansu          104.0200       34.4300          102       136     2012      04        23        114              0.230417      16.539673       3.701412       0.236493   -9999.000000       0.305600   -9999.000000       0.481000
56093     56093     gansu          104.0200       34.4300          102       136     2012      04        24        115              0.238042      12.803711       0.000000       0.261213       0.125000       0.206300       0.066400       0.797000
56093     56093     gansu          104.0200       34.4300          102       136     2012      04        25        116              0.000000      12.481842       0.492070       0.251843       0.114000   -9999.000000       0.063300   -9999.000000
56093     56093     gansu          104.0200       34.4300          102       136     2012      04        26        117              0.224000      13.951965       0.489453       0.241501       0.104000       0.257300       0.065100       0.513000
56093     56093     gansu          104.0200       34.4300          102       136     2012      04        27        118              0.221208      14.524078       0.168273       0.235504   -9999.000000   -9999.000000       0.066000   -9999.000000
56093     56093     gansu          104.0200       34.4300          102       136     2012      04        28        119              0.218208      16.732269       0.356128       0.228455       0.102000   -9999.000000       0.065000       0.483000
56093     56093     gansu          104.0200       34.4300          102       136     2012      04        29        120              0.216565      15.736786       0.865918       0.228525       0.104500       0.152700   -9999.000000       0.673000
56093     56093     gansu          104.0200       34.4300          102       136     2012      04        30        121              0.214833      18.315521       0.000000       0.222564       0.131500   -9999.000000       0.070900       0.740000
56093     56093     gansu          104.0200       34.4300          102       136     2012      05        01        122              0.215625      11.738831       0.229564       0.227803       0.130000       0.152200       0.062800       0.523000
56093     56093     gansu          104.0200       34.4300          102       136     2012      05        02        123              0.213875      12.135193       1.844785       0.230476       0.146000       0.120300       0.080400   -9999.000000
56093     56093     gansu          104.0200       34.4300          102       136     2012      05        03        124              0.215833       9.683746       1.470421       0.248470       0.168000       0.145000       0.069300       0.901000
56093     56093     gansu          104.0200       34.4300          102       136     2012      05        04        125              0.216792      12.090607       0.096754       0.256827       0.151000       0.135400   -9999.000000       0.699000
56093     56093     gansu          104.0200       34.4300          102       136     2012      05        05        126              0.213625      14.525574       0.181677       0.249998       0.142500   -9999.000000       0.062200       0.684000
56093     56093     gansu          104.0200       34.4300          102       136     2012      05        06        127              0.231708      13.556061       4.661711       0.247773       0.129000       0.258200       0.077800       1.000000
56093     56093     gansu          104.0200       34.4300          102       136     2012      05        07        128              0.256792      16.232697      12.901236       0.263409   -9999.000000       0.158500       0.082000   -9999.000000
56093     56093     gansu          104.0200       34.4300          102       136     2012      05        08        129              0.260500      14.403320       3.742217       0.303093   -9999.000000       0.226400       0.086600       1.000000
56093     56093     gansu          104.0200       34.4300          102       136     2012      05        09        130              0.254708      14.688049       0.000000       0.298909   -9999.000000       0.387800       0.081400   -9999.000000
56093     56093     gansu          104.0200       34.4300          102       136     2012      05        10        131              0.274292      17.967804      22.164389       0.282191       0.151000   -9999.000000   -9999.000000       1.000000
56093     56093     gansu          104.0200       34.4300          102       136     2012      05        11        132              0.296000      18.092743      18.823065       0.329701       0.200000       0.421100       0.098900       1.000000
56093     56093     gansu          104.0200       34.4300          102       136     2012      05        12        133              0.290292      13.839203       0.133382       0.340749       0.199000       0.526900       0.087600   -9999.000000
56093     56093     gansu          104.0200       34.4300          102       136     2012      05        13        134              0.300042      13.565826      10.357700       0.322998   -9999.000000   -9999.000000       0.088500       1.000000
56093     56093     gansu          104.0200       34.4300          102       136     2012      05        14        135              0.285958       8.476898       0.510437       0.334274   -9999.000000       0.283200       0.117000   -9999.000000
56093     56093     gansu          104.0200       34.4300          102       136     2012      05        15        136              0.275125      12.971436       0.000000       0.311978       0.182000   -9999.000000   -9999.000000       0.874000
56093     56093     gansu          104.0200       34.4300          102       136     2012      05        16        137              0.265833      15.950226       0.000000       0.300837       0.187000       0.219400   -9999.000000   -9999.000000
56093     56093     gansu          104.0200       34.4300          102       136     2012      05        17        138              0.259958      15.570282       0.124152       0.293792       0.169000       0.234900       0.100700   -9999.000000
56093     56093     gansu          104.0200       34.4300          102       136     2012      05        18        139              0.256043      15.438080       0.624773       0.290245   -9999.000000   -9999.000000       0.095100       0.816000
56093     56093     gansu          104.0200       34.4300          102       136     2012      05        19        140              0.250625      16.256622       0.417183       0.287037       0.147000       0.169400       0.085100   -9999.000000
56093     56093     gansu          104.0200       34.4300          102       136     2012      05        20        141              0.245750      19.871185       6.446425       0.280148       0.144000       0.232100       0.075700       0.922000
56093     56093     gansu          104.0200       34.4300          102       136     2012      05        21        142              0.289250      20.186371       9.763307       0.288827       0.317000       0.254000   -9999.000000   -9999.000000
56093     56093     gansu          104.0200       34.4300          102       136     2012      05        22        143              0.291917      12.422516       1.130199       0.319758       0.301000   -9999.000000       0.125700       1.000000
56093     56093     gansu          104.0200       34.4300          102       136     2012      05        23        144              0.283583      12.342102       2.961583       0.311457   -9999.000000   -9999.000000       0.121500       1.000000
56093     56093     gansu          104.0200       34.4300          102       136     2012      05        24        145              0.280958      11.850281       0.364475       0.307038   -9999.000000   -9999.000000       0.120200   -9999.000000
56093     56093     gansu          104.0200       34.4300          102       136     2012      05        25        146              0.000000      12.507507       0.339175       0.302663   -9999.000000   -9999.000000       0.122000       0.916000
56093     56093     gansu          104.0200       34.4300          102       136     2012      05        26        147              0.284667      12.165863       2.834835       0.296330       0.242500   -9999.000000       0.103400   -9999.000000
56093     56093     gansu          104.0200       34.4300          102       136     2012      05        27        148              0.282083      17.638550       4.496202       0.295353       0.230000       0.435600   -9999.000000       0.953000
56093     56093     gansu          104.0200       34.4300          102       136     2012      05        28        149              0.293250      19.025513      11.180394       0.293303   -9999.000000   -9999.000000   -9999.000000       1.000000
56093     56093     gansu          104.0200       34.4300          102       136     2012      05        29        150              0.287958      13.980713       0.000000       0.325798       0.243000       0.260400       0.110100       1.000000
56093     56093     gansu          104.0200       34.4300          102       136     2012      05        30        151              0.275917      17.202942       0.263510       0.305543       0.222000       0.218400       0.102000   -9999.000000
56093     56093     gansu          104.0200       34.4300          102       136     2012      05        31        152              0.279083      18.705444       3.456315       0.294657       0.231000       0.322900       0.102300   -9999.000000
56093     56093     gansu          104.0200       34.4300          102       136     2012      06        01        153              0.279333      14.050385       0.176210       0.304328       0.257000       0.357900   -9999.000000       0.804000
56093     56093     gansu          104.0200       34.4300          102       136     2012      06        02        154              0.274625      16.965027       1.967587       0.293260       0.269000   -9999.000000   -9999.000000       0.927000
56093     56093     gansu          104.0200       34.4300          102       136     2012      06        03        155              0.275083      15.980865       1.179322       0.295101   -9999.000000       0.365700   -9999.000000       0.898000
56093     56093     gansu          104.0200       34.4300          102       136     2012      06        04        156              0.271208      15.662781       1.696586       0.294117       0.246000       0.195500       0.086100       0.833000
56093     56093     gansu          104.0200       34.4300          102       136     2012      06        05        157              0.274500      15.245270       1.465057       0.290856       0.255500       0.202500       0.090900   -9999.000000
56093     56093     gansu          104.0200       34.4300          102       136     2012      06        06        158              0.273167      14.872742       5.919360       0.298326       0.258000       0.114800       0.076900       0.991000
56093     56093     gansu          104.0200       34.4300          102       136     2012      06        07        159              0.269958      15.989410       0.365756       0.304390       0.237000       0.199500   -9999.000000   -9999.000000
56093     56093     gansu          104.0200       34.4300          102       136     2012      06        08        160              0.286167      18.996735       8.514513       0.296078       0.253000       0.191200       0.077600       0.909000
56093     56093     gansu          104.0200       34.4300          102       136     2012      06        09        161              0.276125      14.946167       0.638463       0.318795       0.213000       0.222000       0.075600       0.782000
56093     56093     gansu          104.0200       34.4300          102       136     2012      06        10        162              0.266208      18.205627       0.000000       0.298590       0.222000   -9999.000000       0.072000   -9999.000000
56093     56093     gansu          104.0200       34.4300          102       136     2012      06        11        163              0.000000      16.430969       1.144837       0.292041       0.313000   -9999.000000       0.081000       0.712000
56093     56093     gansu          104.0200       34.4300          102       136     2012      06        12        164              0.254917      17.187317       0.186018       0.291235       0.309000       0.331000       0.075600   -9999.000000
56093     56093     gansu          104.0200       34.4300          102       136     2012      06        13        165              0.250750      17.816315       1.008906       0.284164       0.303000   -9999.000000   -9999.000000       0.762000
56093     56093     gansu          104.0200       34.4300          102       136     2012      06        14        166              0.244458      17.429688       0.504009       0.283970       0.269000       0.264300       0.075800   -9999.000000
56093     56093     gansu          104.0200       34.4300          102       136     2012      06        15        167              0.237625      17.780365       1.446820       0.281739       0.285000   -9999.000000       0.076600   -9999.000000
56093     56093     gansu          104.0200       34.4300          102       136     2012      06        16        168              0.233333      15.373444       0.000000       0.278271       0.285500       0.142800       0.072300       0.688000
56093     56093     gansu          104.0200       34.4300          102       136     2012      06        17        169              0.234417      17.912323       9.136665       0.272318       0.317500       0.249100       0.064800   -9999.000000
56093     56093     gansu          104.0200       34.4300          102       136     2012      06        18        170              0.238042      18.854340       0.062610       0.296290       0.224000       0.300300   -9999.000000       0.657000
56093     56093     gansu          104.0200       34.4300          102       136     2012      06        19        171              0.233417      19.498505       0.604820       0.289371   -9999.000000       0.240000   -9999.000000   -9999.000000
56093     56093     gansu          104.0200       34.4300          102       136     2012      06        20        172              0.234083      19.145844       0.362203       0.280542       0.280000   -9999.000000       0.103600       0.601000
56093     56093     gansu          104.0200       34.4300          102       136     2012      06        21        173              0.234750      19.283234       0.988172       0.275004       0.377000       0.122600       0.095000       0.654000
56093     56093     gansu          104.0200       34.4300          102       136     2012      06        22        174              0.234167      19.708862       0.486481       0.273210       0.402500       0.079600       0.099200   -9999.000000
56093     56093     gansu          104.0200       34.4300          102       136     2012      06        23        175              0.231708      20.161407       0.844556       0.266428   -9999.000000       0.089800       0.101700       0.537000
56093     56093     gansu          104.0200       34.4300          102       136     2012      06        24        176              0.228333      20.165863       2.243130       0.264521   -9999.000000       0.042600   -9999.000000   -9999.000000
56093     56093     gansu          104.0200       34.4300          102       136     2012      06        25        177              0.230375      17.170593       0.062396       0.276895       0.392000   -9999.000000       0.114600       0.672000
56093     56093     gansu          104.0200       34.4300          102       136     2012      06        26        178              0.228375      19.501251       1.940959       0.268490       0.419500       0.139600       0.131400       0.850000
56093     56093     gansu          104.0200       34.4300          102       136     2012      06        27        179              0.232708      17.066315      12.985614       0.275432       0.450000       0.428200       0.139100       0.788000
56093     56093     gansu          104.0200       34.4300          102       136     2012      06        28        180              0.271083      17.665863      12.771408       0.306371       0.452000   -9999.000000       0.131400       1.000000
56093     56093     gansu          104.0200       34.4300          102       136     2012      06        29        181              0.286000      16.108429       0.286530       0.327311       0.419000   -9999.000000       0.138200   -9999.000000
56093     56093     gansu          104.0200       34.4300          102       136     2012      06        30        182              0.270917      16.316345       0.000000       0.313589       0.454000   -9999.000000   -9999.000000   -9999.000000
56093     56093     gansu          104.0200       34.4300          102       136     2012      07        01        183              0.259375      19.808228       0.383650       0.298733       0.447500       0.176100       0.124900       0.738000
56093     56093     gansu          104.0200       34.4300          102       136     2012      07        02        184              0.250875      21.185120       0.414503       0.290354       0.433000       0.204000       0.117600       0.785000
56093     56093     gansu          104.0200       34.4300          102       136     2012      07        03        185              0.254625      19.492706       6.364073       0.287423   -9999.000000   -9999.000000       0.120400       0.904000
56093     56093     gansu          104.0200       34.4300          102       136     2012      07        04        186              0.265792      17.603180       0.330225       0.302461       0.428000       0.207700       0.119800   -9999.000000
56093     56093     gansu          104.0200       34.4300          102       136     2012      07        05        187              0.256167      18.225616       0.636384       0.295554   -9999.000000       0.255100   -9999.000000       0.772000
56093     56093     gansu          104.0200       34.4300          102       136     2012      07        06        188              0.250500      20.706512       3.892754       0.284277   -9999.000000       0.178600   -9999.000000   -9999.000000
56093     56093     gansu          104.0200       34.4300          102       136     2012      07        07        189              0.248417      17.905914       5.398625       0.299372   -9999.000000       0.275600       0.115600       0.670000
56093     56093     gansu          104.0200       34.4300          102       136     2012      07        08        190              0.296750      20.319946       9.088453       0.290258       0.455000   -9999.000000       0.123600       0.883000
56093     56093     gansu          104.0200       34.4300          102       136     2012      07        09        191              0.285292      17.320190       2.670966       0.323470       0.415000       0.161700       0.106700   -9999.000000
56093     56093     gansu          104.0200       34.4300          102       136     2012      07        10        192              0.275625      17.176636       0.000000       0.311237   -9999.000000       0.216500       0.100900       0.853000
56093     56093     gansu          104.0200       34.4300          102       136     2012      07        11        193              0.287375      20.028931       7.130439       0.297359       0.468000       0.101200   -9999.000000   -9999.000000
56093     56093     gansu          104.0200       34.4300          102       136     2012      07        12        194              0.286583      16.868469       0.765763       0.313556       0.459500       0.100600       0.102700       0.845000
56093     56093     gansu          104.0200       34.4300          102       136     2012      07        13        195              0.276583      18.100342       0.175752       0.303688       0.461000   -9999.000000       0.096800   -9999.000000
56093     56093     gansu          104.0200       34.4300          102       136     2012      07        14        196              0.267625      19.866760       0.331497       0.294997       0.456000       0.128500       0.098800   -9999.000000
56093     56093     gansu          104.0200       34.4300          102       136     2012      07        15        197              0.261792      19.767426       0.406797       0.288756       0.442000       0.361900       0.098600       0.716000
56093     56093     gansu          104.0200       34.4300          102       136     2012      07        16        198              0.255500      20.461761       6.638787       0.282690   -9999.000000   -9999.000000   -9999.000000   -9999.000000
56093     56093     gansu          104.0200       34.4300          102       136     2012      07        17        199              0.284417      19.683380       5.820861       0.287559       0.465000   -9999.000000   -9999.000000       0.959000
56093     56093     gansu          104.0200       34.4300          102       136     2012      07        18        200              0.273417      17.717743       0.282049       0.317577       0.454000       0.211700       0.088800   -9999.000000
56093     56093     gansu          104.0200       34.4300          102       136     2012      07        19        201              0.274500      18.265381       1.247922       0.299988       0.452000       0.121200       0.087500       0.930000
56093     56093     gansu          104.0200       34.4300          102       136     2012      07        20        202              0.272583      18.751678       6.703900       0.298605       0.457000       0.161300       0.092800       0.917000
56093     56093     gansu          104.0200       34.4300          102       136     2012      07        21        203              0.297500      19.699310       6.742249       0.301370   -9999.000000   -9999.000000       0.094100   -9999.000000
56093     56093     gansu          104.0200       34.4300          102       136     2012      07        22        204              0.284750      16.749786       1.266194       0.324837       0.460000       0.235300   -9999.000000       0.805000
56093     56093     gansu          104.0200       34.4300          102       136     2012      07        23        205              0.275000      18.663574       0.000000       0.303666       0.453500       0.139500       0.077200   -9999.000000
56093     56093     gansu          104.0200       34.4300          102       136     2012      07        24        206              0.296083      18.127380       9.194539       0.296242       0.461500       0.185500       0.086500       0.909000
56093     56093     gansu          104.0200       34.4300          102       136     2012      07        25        207              0.294458      19.243530       0.100667       0.315565       0.445000       0.229500       0.084500       0.824000
56093     56093     gansu          104.0200       34.4300          102       136     2012      07        26        208              0.290500      21.693787      16.303514       0.302632   -9999.000000   -9999.000000       0.081400       0.888000
56093     56093     gansu          104.0200       34.4300          102       136     2012      07        27        209              0.299167      20.864044       1.604459       0.321790       0.458000       0.244600       0.074100       0.948000
56093     56093     gansu          104.0200       34.4300          102       136     2012      07        28        210              0.290083      21.083435       2.215189       0.321935       0.455000       0.256700   -9999.000000   -9999.000000
56093     56093     gansu          104.0200       34.4300          102       136     2012      07        29        211              0.279792      21.038147       4.343503       0.313443       0.456000       0.315800       0.076800       0.852000
56093     56093     gansu          104.0200       34.4300          102       136     2012      07        30        212              0.299375      22.875641      18.041361       0.305857   -9999.000000       0.173600       0.135900       1.000000
56093     56093     gansu          104.0200       34.4300          102       136     2012      07        31        213              0.307417      18.275818       9.329823       0.343007       0.465000   -9999.000000       0.139900       1.000000
56093     56093     gansu          104.0200       34.4300          102       136     2012      08        01        214              0.301792      16.490814       0.000000       0.340988   -9999.000000   -9999.000000       0.139200       0.857000
56093     56093     gansu          104.0200       34.4300          102       136     2012      08        02        215              0.288917      17.839630       0.000000       0.322927   -9999.000000       0.223100   -9999.000000   -9999.000000
56093     56093     gansu          104.0200       34.4300          102       136     2012      08        03        216              0.280042      20.058990       3.904842       0.310618   -9999.000000   -9999.000000   -9999.000000       0.875000
56093     56093     gansu          104.0200       34.4300          102       136     2012      08        04        217              0.281083      20.341278       4.012191       0.312864   -9999.000000       0.316600       0.139800   -9999.000000
56093     56093     gansu          104.0200       34.4300          102       136     2012      08        05        218              0.284417      19.694000       0.467942       0.318008   -9999.000000       0.306600       0.130600       0.876000
56093     56093     gansu          104.0200       34.4300          102       136     2012      08        06        219              0.276583      18.195770       0.980536       0.309917   -9999.000000       0.194900       0.157400       0.805000
56093     56093     gansu          104.0200       34.4300          102       136     2012      08        07        220              0.274000      20.380615       1.924280       0.302358   -9999.000000       0.342800       0.154200   -9999.000000
56093     56093     gansu          104.0200       34.4300          102       136     2012      08        08        221              0.272583      20.717743       0.644595       0.302584   -9999.000000   -9999.000000   -9999.000000       0.985000
56093     56093     gansu          104.0200       34.4300          102       136     2012      08        09        222              0.263625      21.225983       0.000000       0.297753       0.465000       0.092500       0.153700   -9999.000000
56093     56093     gansu          104.0200       34.4300          102       136     2012      08        10        223              0.255792      22.060486       0.751433       0.290699   -9999.000000       0.239300       0.147900       0.716000
56093     56093     gansu          104.0200       34.4300          102       136     2012      08        11        224              0.251583      23.084015       0.612635       0.285162       0.455000       0.163600       0.158800   -9999.000000
56093     56093     gansu          104.0200       34.4300          102       136     2012      08        12        225              0.252625      20.966187       1.573492       0.285699       0.462000       0.252600       0.155300   -9999.000000
56093     56093     gansu          104.0200       34.4300          102       136     2012      08        13        226              0.259250      21.356323      10.379292       0.287303       0.451000   -9999.000000       0.164600       0.995000
56093     56093     gansu          104.0200       34.4300          102       136     2012      08        14        227              0.286458      20.616150       0.287965       0.309447       0.455500       0.360900   -9999.000000   -9999.000000
56093     56093     gansu          104.0200       34.4300          102       136     2012      08        15        228              0.270708      18.980286       0.000000       0.307313       0.456000       0.256300       0.184700       0.810000
56093     56093     gansu          104.0200       34.4300          102       136     2012      08        16        229              0.275875      20.845825      51.980846       0.295294   -9999.000000       0.274600       0.206400   -9999.000000
56093     56093     gansu          104.0200       34.4300          102       136     2012      08        17        230              0.324625      20.973114      18.017456       0.347466   -9999.000000       0.278400       0.208800       1.000000
56093     56093     gansu          104.0200       34.4300          102       136     2012      08        18        231              0.322042      17.324127      11.269094       0.360824       0.461000   -9999.000000       0.195700       1.000000
56093     56093     gansu          104.0200       34.4300          102       136     2012      08        19        232              0.302792      15.847443       0.192771       0.355662       0.458000       0.317700   -9999.000000   -9999.000000
56093     56093     gansu          104.0200       34.4300          102       136     2012      08        20        233              0.289917      19.316620       2.322546       0.330439       0.461500       0.438700   -9999.000000       0.968000
56093     56093     gansu          104.0200       34.4300          102       136     2012      08        21        234              0.285625      19.138885       0.520813       0.324104       0.468000   -9999.000000       0.209300   -9999.000000
56093     56093     gansu          104.0200       34.4300          102       136     2012      08        22        235              0.286750      18.040588       5.048336       0.318300       0.429000       0.209000       0.209500   -9999.000000
56093     56093     gansu          104.0200       34.4300          102       136     2012      08        23        236              0.285667      17.570526       0.000000       0.323800       0.461000       0.275300       0.205700       0.873000
56093     56093     gansu          104.0200       34.4300          102       136     2012      08        24        237              0.278583      18.622009       0.989508       0.314302       0.469000       0.130500       0.203400   -9999.000000
56093     56093     gansu          104.0200       34.4300          102       136     2012      08        25        238              0.000000      17.722870       2.236885       0.311464       0.454000   -9999.000000   -9999.000000       0.847000
56093     56093     gansu          104.0200       34.4300          102       136     2012      08        26        239              0.270500      17.518616       0.000000       0.312787       0.452000   -9999.000000       0.208100   -9999.000000
56093     56093     gansu          104.0200       34.4300          102       136     2012      08        27        240              0.267583      19.305969       3.754416       0.305168       0.455000       0.201000       0.229400       0.908000
56093     56093     gansu          104.0200       34.4300          102       136     2012      08        28        241              0.265917      15.706696       0.000000       0.315469       0.450000       0.405500       0.225400       0.875000
56093     56093     gansu          104.0200       34.4300          102       136     2012      08        29        242              0.260667      18.527740       0.000000       0.305179       0.459000   -9999.000000       0.218400       0.881000
56093     56093     gansu          104.0200       34.4300          102       136     2012      08        30        243              0.260583      18.529785       2.343495       0.301748       0.463000       0.273000       0.214500       0.827000
56093     56093     gansu          104.0200       34.4300          102       136     2012      08        31        244              0.287042      18.793823      17.752150       0.303457       0.460000   -9999.000000   -9999.000000   -9999.000000
56093     56093     gansu          104.0200       34.4300          102       136     2012      09        01        245              0.314083      16.245575       1.535440       0.324758       0.461000       0.212800       0.238700       1.000000
56093     56093     gansu          104.0200       34.4300          102       136     2012      09        02        246              0.301417      15.395569       0.296036       0.332461   -9999.000000       0.208900       0.233900   -9999.000000
56093     56093     gansu          104.0200       34.4300          102       136     2012      09        03        247              0.292708      17.712891       0.119416       0.315884       0.451000       0.148600       0.222000       0.776000
56093     56093     gansu          104.0200       34.4300          102       136     2012      09        04        248              0.285667      18.618866       0.052287       0.308075       0.451000       0.181100       0.221900       0.746000
56093     56093     gansu          104.0200       34.4300          102       136     2012      09        05        249              0.280583      19.361908       2.099048       0.302153       0.440000   -9999.000000   -9999.000000   -9999.000000
56093     56093     gansu          104.0200       34.4300          102       136     2012      09        06        250              0.279292      19.363190       0.326144       0.303015   -9999.000000       0.225300   -9999.000000       0.873000
56093     56093     gansu          104.0200       34.4300          102       136     2012      09        07        251              0.305000      19.800385      17.403103       0.301472   -9999.000000       0.183900       0.240400   -9999.000000
56093     56093     gansu          104.0200       34.4300          102       136     2012      09        08        252              0.300833      16.372131       0.203486       0.339278       0.457000   -9999.000000       0.246100       0.906000
56093     56093     gansu          104.0200       34.4300          102       136     2012      09        09        253              0.313792      18.376862       7.487445       0.317735       0.456000       0.272000       0.218800   -9999.000000
56093     56093     gansu          104.0200       34.4300          102       136     2012      09        10        254              0.318917      17.404663       4.499516       0.325713       0.453000       0.228000       0.232500   -9999.000000
56093     56093     gansu          104.0200       34.4300          102       136     2012      09        11        255              0.309208      15.748627       0.304011       0.328847       0.359000       0.213500   -9999.000000       0.971000
56093     56093     gansu          104.0200       34.4300          102       136     2012      09        12        256              0.302292      14.847961       0.397167       0.316662       0.322000       0.244100       0.224900   -9999.000000
56093     56093     gansu          104.0200       34.4300          102       136     2012      09        13        257              0.296583      11.664337       0.291514       0.312555   -9999.000000   -9999.000000       0.222000       0.785000
56093     56093     gansu          104.0200       34.4300          102       136     2012      09        14        258              0.292000      13.753479       0.018916       0.308380       0.343000       0.136400       0.228400   -9999.000000
56093     56093     gansu          104.0200       34.4300          102       136     2012      09        15        259              0.285048      15.616943       2.354773       0.303627       0.326500       0.299700       0.221000       0.846000
56093     56093     gansu          104.0200       34.4300          102       136     2012      09        16        260              0.281583      15.864014       0.350784       0.300379       0.312500       0.238300       0.223800       0.839000
56093     56093     gansu          104.0200       34.4300          102       136     2012      09        17        261              0.280625      13.257538       0.000000       0.301770       0.289000       0.364000   -9999.000000   -9999.000000
56093     56093     gansu          104.0200       34.4300          102       136     2012      09        18        262              0.276250      15.640564       2.852761       0.298472       0.307000   -9999.000000       0.183700       0.675000
56093     56093     gansu          104.0200       34.4300          102       136     2012      09        19        263              0.271167      15.657928       0.376245       0.295755   -9999.000000       0.312400       0.204500   -9999.000000
56093     56093     gansu          104.0200       34.4300          102       136     2012      09        20        264              0.271458      16.472046       2.489645       0.293399       0.337000       0.154100       0.200300       0.895000
56093     56093     gansu          104.0200       34.4300          102       136     2012      09        21        265              0.271750      13.118195       0.000000       0.303551   -9999.000000       0.204100       0.189900       0.807000
56093     56093     gansu          104.0200       34.4300          102       136     2012      09        22        266              0.267917      15.475739       4.633839       0.297473       0.278000       0.118400   -9999.000000       0.812000
56093     56093     gansu          104.0200       34.4300          102       136     2012      09        23        267              0.273750      15.846039       0.833633       0.301326       0.292000   -9999.000000       0.201400       0.810000
56093     56093     gansu          104.0200       34.4300          102       136     2012      09        24        268              0.282125      15.008789      10.622620       0.309580   -9999.000000       0.422700       0.183100   -9999.000000
56093     56093     gansu          104.0200       34.4300          102       136     2012      09        25        269              0.295652      12.885895       1.102134       0.324150   -9999.000000       0.207900       0.183200       0.933000
56093     56093     gansu          104.0200       34.4300          102       136     2012      09        26        270              0.304500      12.273071       0.520165       0.321498       0.310000   -9999.000000       0.171100       0.864000
56093     56093     gansu          104.0200       34.4300          102       136     2012      09        27        271              0.303286      14.710510       0.751659       0.311484       0.324000       0.144100       0.183900       0.896000
56093     56093     gansu          104.0200       34.4300          102       136     2012      09        28        272              0.291733      12.862823       0.000000       0.309236       0.307000   -9999.000000   -9999.000000       0.727000
56093     56093     gansu          104.0200       34.4300          102       136     2012      09        29        273              0.296333      13.743530      13.302114       0.304678   -9999.000000       0.208200       0.180400   -9999.000000
56093     56093     gansu          104.0200       34.4300          102       136     2012      09        30        274              0.296000      11.470367       0.752292       0.330450       0.324000   -9999.000000       0.174300       0.887000
56093     56093     gansu          104.0200       34.4300          102       136     2012      10        01        275              0.290167      13.292236       0.034396       0.318750       0.231000   -9999.000000       0.133300   -9999.000000
56093     56093     gansu          104.0200       34.4300          102       136     2012      10        02        276              0.289333      14.125763       2.793134       0.311463       0.220000       0.099900       0.131700       0.912000
56093     56093     gansu          104.0200       34.4300          102       136     2012      10        03        277              0.288250      11.149261       6.819403       0.315731       0.238000   -9999.000000   -9999.000000       0.858000
56093     56093     gansu          104.0200       34.4300          102       136     2012      10        04        278              0.289833      13.396210       0.118247       0.319808       0.223000       0.299700   -9999.000000   -9999.000000
56093     56093     gansu          104.0200       34.4300          102       136     2012      10        05        279              0.286833      10.825745       0.313707       0.319561       0.256000       0.211000       0.139100       0.871000
56093     56093     gansu          104.0200       34.4300          102       136     2012      10        06        280              0.283333      11.241943       0.000000       0.311923       0.236000   -9999.000000       0.138700   -9999.000000
56093     56093     gansu          104.0200       34.4300          102       136     2012      10        07        281              0.284083      10.213165       3.715275       0.309607       0.229500       0.346500       0.132600       1.000000
56093     56093     gansu          104.0200       34.4300          102       136     2012      10        08        282              0.293000      11.918335       2.632004       0.315376   -9999.000000       0.166600       0.132100   -9999.000000
56093     56093     gansu          104.0200       34.4300          102       136     2012      10        09        283              0.289417       9.420380       0.065185       0.319138       0.249000       0.127300   -9999.000000   -9999.000000
56093     56093     gansu          104.0200       34.4300          102       136     2012      10        10        284              0.284167      10.701660       0.339159       0.311496   -9999.000000       0.222700       0.127900       0.924000
56093     56093     gansu          104.0200       34.4300          102       136     2012      10        11        285              0.284333      11.801483       0.607747       0.307465   -9999.000000   -9999.000000       0.123900   -9999.000000
56093     56093     gansu          104.0200       34.4300          102       136     2012      10        12        286              0.287667      10.148712       0.591017       0.307838       0.203000   -9999.000000       0.129100       0.950000
56093     56093     gansu          104.0200       34.4300          102       136     2012      10        13        287              0.287667      10.502777       0.697023       0.306772       0.194500       0.241100       0.125300   -9999.000000
56093     56093     gansu          104.0200       34.4300          102       136     2012      10        14        288              0.296417       9.962036       1.327076       0.306947       0.201000   -9999.000000       0.121400       0.919000
56093     56093     gansu          104.0200       34.4300          102       136     2012      10        15        289              0.317167      12.009705       3.984051       0.307088       0.174000       0.095100   -9999.000000       1.000000
56093     56093     gansu          104.0200       34.4300          102       136     2012      10        16        290              0.314292      11.897491       0.797078       0.313671   -9999.000000   -9999.000000       0.117600   -9999.000000
56093     56093     gansu          104.0200       34.4300          102       136     2012      10        17        291              0.304667       9.558502       0.767803       0.308883   -9999.000000       0.339100       0.126700       0.784000
56093     56093     gansu          104.0200       34.4300          102       136     2012      10        18        292              0.300833      10.787354       0.154515       0.304906       0.199000       0.195900       0.119200   -9999.000000
56093     56093     gansu          104.0200       34.4300          102       136     2012      10        19        293              0.300333      10.034119       0.106154       0.305272       0.175000   -9999.000000       0.121600       0.904000
56093     56093     gansu          104.0200       34.4300          102       136     2012      10        20        294              0.297167      10.401001       0.030765       0.303177       0.176000   -9999.000000   -9999.000000       0.848000
56093     56093     gansu          104.0200       34.4300          102       136     2012      10        21        295              0.296000      10.741425       0.120983       0.301199   -9999.000000       0.214800   -9999.000000       0.788000
56093     56093     gansu          104.0200       34.4300          102       136     2012      10        22        296              0.293500       6.022247       0.917523       0.301644   -9999.000000   -9999.000000       0.111200       0.733000
56093     56093     gansu          104.0200       34.4300          102       136     2012      10        23        297              0.292000       8.781067       0.000000       0.300957   -9999.000000       0.338500       0.107300   -9999.000000
56093     56093     gansu          104.0200       34.4300          102       136     2012      10        24        298              0.289833       7.039551       0.051009       0.301548   -9999.000000   -9999.000000       0.105400       0.725000
56093     56093     gansu          104.0200       34.4300          102       136     2012      10        25        299              0.000000       8.397034       2.395695       0.299024       0.197000       0.255400       0.103300       1.000000
56093     56093     gansu          104.0200       34.4300          102       136     2012      10        26        300              0.295000       8.920532       0.157704       0.303793   -9999.000000       0.371300   -9999.000000       0.912000
56093     56093     gansu          104.0200       34.4300          102       136     2012      10        27        301              0.293333       8.746368       1.256517       0.301712   -9999.000000   -9999.000000       0.104900       0.804000
56093     56093     gansu          104.0200       34.4300          102       136     2012      10        28        302              0.000000       9.834320       4.212220       0.302662       0.206000       0.185500       0.118600   -9999.000000
56093     56093     gansu          104.0200       34.4300          102       136     2012      10        29        303              0.324250       9.617004       4.309425       0.310190       0.196000   -9999.000000       0.096500       0.912000
56093     56093     gansu          104.0200       34.4300          102       136     2012      10        30        304              0.310583       6.575806       2.675444       0.319039       0.204000       0.291500       0.101300   -9999.000000
56093     56093     gansu          104.0200       34.4300          102       136     2012      10        31        305              0.304167       6.368805       5.470321       0.317229       0.184000       0.103000       0.102800       0.785000
56093     56093     gansu          104.0200       34.4300          102       136     2012      11        01        306              0.299833       6.664307       0.159179       0.321810   -9999.000000   -9999.000000   -9999.000000       0.661000
56093     56093     gansu          104.0200       34.4300          102       136     2012      11        02        307              0.297333       6.289581       0.000000       0.314388   -9999.000000       0.135000       0.087200   -9999.000000
56093     56093     gansu          104.0200       34.4300          102       136     2012      11        03        308              0.292500       5.652557       0.471023       0.301087       0.212000       0.148400       0.079500       0.554000
56093     56093     gansu          104.0200       34.4300          102       136     2012      11        04        309              0.290167       3.619720       0.000000       0.294732       0.193000       0.114900       0.091100   -9999.000000
56093     56093     gansu          104.0200       34.4300          102       136     2012      11        05        310              0.288333       4.759369       0.000000       0.297664       0.187000       0.098300       0.087800       0.480000
56093     56093     gansu          104.0200       34.4300          102       136     2012      11        06        311              0.288167       5.357910       0.096958       0.299589   -9999.000000   -9999.000000   -9999.000000   -9999.000000
56093     56093     gansu          104.0200       34.4300          102       136     2012      11        07        312              0.295000       5.206207       2.388010       0.300512   -9999.000000   -9999.000000   -9999.000000   -9999.000000
56093     56093     gansu          104.0200       34.4300          102       136     2012      11        08        313              0.293833       3.207916       0.208620       0.304432       0.202000       0.085000       0.085300       0.557000
56093     56093     gansu          104.0200       34.4300          102       136     2012      11        09        314              0.294000       5.020721       0.286195       0.302443   -9999.000000       0.015500       0.081400   -9999.000000
56093     56093     gansu          104.0200       34.4300          102       136     2012      11        10        315              0.291500       3.003265       0.000000       0.300109   -9999.000000   -9999.000000       0.077300       0.361000
56093     56093     gansu          104.0200       34.4300          102       136     2012      11        11        316              0.288500       1.776611       2.548088       0.273941       0.143000   -9999.000000       0.084000   -9999.000000
56093     56093     gansu          104.0200       34.4300          102       136     2012      11        12        317              0.286417       3.313263       0.000000       0.281984   -9999.000000       0.120500   -9999.000000       0.565000
56093     56093     gansu          104.0200       34.4300          102       136     2012      11        13        318              0.000000       4.305878       0.000000       0.288320   -9999.000000       0.073900       0.074500       0.495000
56093     56093     gansu          104.0200       34.4300          102       136     2012      11        14        319              0.284833       5.099365       0.604592       0.293156       0.163000   -9999.000000       0.076800   -9999.000000
56093     56093     gansu          104.0200       34.4300          102       136     2012      11        15        320              0.286000       5.597870       0.281686       0.296646       0.159000   -9999.000000       0.069100       0.316000
56093     56093     gansu          104.0200       34.4300          102       136     2012      11        16        321              0.283913       3.148895       0.867841       0.291936       0.139000   -9999.000000       0.076300   -9999.000000
56093     56093     gansu          104.0200       34.4300          102       136     2012      11        17        322              0.000000       4.034882       0.000000       0.285294   -9999.000000   -9999.000000   -9999.000000       0.516000
56093     56093     gansu          104.0200       34.4300          102       136     2012      11        18        323              0.281250       4.529877       0.000000       0.284607   -9999.000000       0.057900   -9999.000000       0.337000
56093     56093     gansu          104.0200       34.4300          102       136     2012      11        19        324              0.281250       3.353638       0.000000       0.281730       0.152000   -9999.000000       0.068100       0.384000
56093     56093     gansu          104.0200       34.4300          102       136     2012      11        20        325              0.281000       3.094025       0.000000       0.278165       0.146000       0.067600       0.066400       0.268000
56093     56093     gansu          104.0200       34.4300          102       136     2012      11        21        326              0.280583       3.503357       0.000000       0.282757       0.137000       0.063500       0.064600   -9999.000000
56093     56093     gansu          104.0200       34.4300          102       136     2012      11        22        327              0.279750       3.849976       0.455803       0.280882   -9999.000000   -9999.000000       0.063800       0.157000
56093     56093     gansu          104.0200       34.4300          102       136     2012      11        23        328              0.276333       0.418884       0.000000       0.222285   -9999.000000       0.093400   -9999.000000       0.210000
56093     56093     gansu          104.0200       34.4300          102       136     2012      11        24        329              0.276130       0.670502       0.127163       0.218984       0.159000   -9999.000000       0.059000       0.362000
56093     56093     gansu          104.0200       34.4300          102       136     2012      11        25        330              0.275696       0.355438       0.324289       0.210814   -9999.000000       0.073900       0.058700       0.128000
56093     56093     gansu          104.0200       34.4300          102       136     2012      11        26        331              0.264750      -1.279785       0.000000       0.172970       0.136000   -9999.000000       0.053200   -9999.000000
56093     56093     gansu          104.0200       34.4300          102       136     2012      11        27        332              0.257708      -0.456360       0.018298       0.185547   -9999.000000   -9999.000000       0.058100       0.140000
56093     56093     gansu          104.0200       34.4300          102       136     2012      11        28        333              0.251542      -1.159821       0.031591       0.163522   -9999.000000   -9999.000000       0.056600   -9999.000000
56093     56093     gansu          104.0200       34.4300          102       136     2012      11        29        334              0.252458      -0.026031       0.051222       0.191868   -9999.000000   -9999.000000   -9999.000000       0.104000
56093     56093     gansu          104.0200       34.4300          102       136     2012      11        30        335              0.250792      -0.078552       0.079007       0.195409       0.138000   -9999.000000       0.060300       0.062000
56093     56093     gansu          104.0200       34.4300          102       136     2012      12        01        336              0.256583       0.074738       0.136113       0.194684       0.144000   -9999.000000       0.060600   -9999.000000
56093     56093     gansu          104.0200       34.4300          102       136     2012      12        02        337              0.250583       0.086731       0.029778       0.202552   -9999.000000       0.084200       0.060500       0.084000
56093     56093     gansu          104.0200       34.4300          102       136     2012      12        03        338              0.246167      -0.203644       0.439315       0.197015   -9999.000000   -9999.000000       0.062300   -9999.000000
56093     56093     gansu          104.0200       34.4300          102       136     2012      12        04        339              0.241417      -0.252228       0.062435       0.192640   -9999.000000   -9999.000000   -9999.000000       0.032000
56093     56093     gansu          104.0200       34.4300          102       136     2012      12        05        340              0.231792      -0.777985       0.096075       0.184978       0.135000   -9999.000000   -9999.000000   -9999.000000
56093     56093     gansu          104.0200       34.4300          102       136     2012      12        06        341              0.217750      -0.539124       0.021012       0.185712       0.131000   -9999.000000       0.059200   -9999.000000
56093     56093     gansu          104.0200       34.4300          102       136     2012      12        07        342              0.215875       0.243225       0.073496       0.204394       0.134000   -9999.000000       0.059800       0.125000
56093     56093     gansu          104.0200       34.4300          102       136     2012      12        08        343              0.204167      -0.066040       0.000000       0.197658       0.119000   -9999.000000       0.055900   -9999.000000
56093     56093     gansu          104.0200       34.4300          102       136     2012      12        09        344              0.186625      -0.386414       0.107403       0.190926   -9999.000000   -9999.000000       0.057000       0.055000
56093     56093     gansu          104.0200       34.4300          102       136     2012      12        10        345              0.176500      -0.439484       0.000000       0.188378   -9999.000000   -9999.000000   -9999.000000   -9999.000000
56093     56093     gansu          104.0200       34.4300          102       136     2012      12        11        346              0.167625      -0.430756       0.000000       0.188302       0.125000   -9999.000000       0.060100       0.131000
56093     56093     gansu          104.0200       34.4300          102       136     2012      12        12        347              0.170125      -0.122894       0.089798       0.194391       0.115000   -9999.000000       0.056300       0.152000
56093     56093     gansu          104.0200       34.4300          102       136     2012      12        13        348              0.185333      -0.015656       0.125006       0.190833       0.108000   -9999.000000       0.056300   -9999.000000
56093     56093     gansu          104.0200       34.4300          102       136     2012      12        14        349              0.198792       0.438904       0.000000       0.207806   -9999.000000   -9999.000000       0.057100       0.111000
56093     56093     gansu          104.0200       34.4300          102       136     2012      12        15        350              0.000000       0.695984       0.144932       0.210671   -9999.000000   -9999.000000       0.060800   -9999.000000
56093     56093     gansu          104.0200       34.4300          102       136     2012      12        16        351              0.192125       0.466675       0.000000       0.210318       0.124000   -9999.000000   -9999.000000       0.105000
56093     56093     gansu          104.0200       34.4300          102       136     2012      12        17        352              0.202667       0.779938       0.061497       0.215974   -9999.000000   -9999.000000       0.058200       0.018000
56093     56093     gansu          104.0200       34.4300          102       136     2012      12        18        353              0.201958      -0.554199       0.000000       0.185189       0.116000   -9999.000000       0.061300       0.042000
56093     56093     gansu          104.0200       34.4300          102       136     2012      12        19        354              0.200000       0.450439       0.323933       0.204259   -9999.000000       0.072800       0.055500       0.004000
56093     56093     gansu          104.0200       34.4300          102       136     2012      12        20        355              0.000000      -0.456543       0.151422       0.181513   -9999.000000   -9999.000000       0.058300   -9999.000000
56093     56093     gansu          104.0200       34.4300          102       136     2012      12        21        356              0.194917      -1.484711       2.598815       0.161205   -9999.000000   -9999.000000   -9999.000000       0.015000
56093     56093     gansu          104.0200       34.4300          102       136     2012      12        22        357              0.165125      -2.952606       0.169050       0.141166       0.137000   -9999.000000   -9999.000000       0.057000
56093     56093     gansu          104.0200       34.4300          102       136     2012      12        23        358              0.131417      -4.690277       0.283296       0.138354       0.129000   -9999.000000       0.056800       0.022000
56093     56093     gansu          104.0200       34.4300          102       136     2012      12        24        359              0.125368      -3.032562       0.000000       0.143304       0.123000   -9999.000000       0.053500   -9999.000000
56093     56093     gansu          104.0200       34.4300          102       136     2012      12        25        360              0.122542      -1.291046       0.000000       0.173876   -9999.000000   -9999.000000       0.048800   -9999.000000
56093     56093     gansu          104.0200       34.4300          102       136     2012      12        26        361              0.000000      -2.480194       0.035730       0.148997   -9999.000000   -9999.000000       0.053500       0.032000
56093     56093     gansu          104.0200       34.4300          102       136     2012      12        27        362              0.113833      -2.261932       0.000000       0.155675       0.123000   -9999.000000   -9999.000000   -9999.000000
56093     56093     gansu          104.0200       34.4300          102       136     2012      12        28        363              0.000000      -1.581512       0.000000       0.164651   -9999.000000   -9999.000000       0.050800       0.014000
56093     56093     gansu          104.0200       34.4300          102       136     2012      12        29        364              0.000000      -5.991699       0.041244       0.125651   -9999.000000   -9999.000000       0.046300   -9999.000000
56093     56093     gansu          104.0200       34.4300          102       136     2012      12        30        365              0.000000      -7.821564       0.000000       0.115570   -9999.000000   -9999.000000       0.053000   -9999.000000
56093     56093     gansu          104.0200       34.4300          102       136     2012      12        31        366              0.098533      -6.605530       0.266679       0.118137   -9999.000000   -9999.000000       0.052000       0.028000
