# Supplementary material for: Research on Fusing Multisatellite Soil Moisture Data Based on Bayesian Model Averaging
Source: Hindawi journal article supplement (doi:10.1155/2018/9310838), 2018-06-25
Supplement: f1 [file 9310838.f1.zip › 2012_sm00-10cm_daily_ZDB_ZHY_56164_366days_allin.txt]

56164     56164     sichuan        100.9833       32.2667          111       124     2012      01        01        001              0.000000   -9999.000000       0.000000   -9999.000000   -9999.000000   -9999.000000   -9999.000000   -9999.000000
56164     56164     sichuan        100.9833       32.2667          111       124     2012      01        02        002              0.010708      -2.385223       0.000000       0.148895   -9999.000000   -9999.000000       0.032000   -9999.000000
56164     56164     sichuan        100.9833       32.2667          111       124     2012      01        03        003              0.000000      -0.182922       0.000000       0.177967   -9999.000000   -9999.000000       0.011300       0.095000
56164     56164     sichuan        100.9833       32.2667          111       124     2012      01        04        004              0.008125      -1.811005       0.000000       0.138450   -9999.000000   -9999.000000       0.028700   -9999.000000
56164     56164     sichuan        100.9833       32.2667          111       124     2012      01        05        005              0.006458      -3.068390       0.000000       0.126738   -9999.000000   -9999.000000       0.016100       0.002000
56164     56164     sichuan        100.9833       32.2667          111       124     2012      01        06        006              0.005083      -5.076569       0.000000       0.111545   -9999.000000   -9999.000000   -9999.000000   -9999.000000
56164     56164     sichuan        100.9833       32.2667          111       124     2012      01        07        007              0.004708      -5.501190       0.000000       0.110169   -9999.000000   -9999.000000       0.013100   -9999.000000
56164     56164     sichuan        100.9833       32.2667          111       124     2012      01        08        008              0.000000      -4.766876       0.000000       0.116344   -9999.000000   -9999.000000       0.030800       0.144000
56164     56164     sichuan        100.9833       32.2667          111       124     2012      01        09        009              0.005250      -4.348724       0.000000       0.117307   -9999.000000   -9999.000000       0.028000   -9999.000000
56164     56164     sichuan        100.9833       32.2667          111       124     2012      01        10        010              0.004792      -3.449036       0.000000       0.128519   -9999.000000   -9999.000000   -9999.000000       0.070000
56164     56164     sichuan        100.9833       32.2667          111       124     2012      01        11        011              0.006750      -2.669281       0.000000       0.135278   -9999.000000   -9999.000000   -9999.000000   -9999.000000
56164     56164     sichuan        100.9833       32.2667          111       124     2012      01        12        012              0.004292      -1.687103       0.000000       0.147919   -9999.000000   -9999.000000   -9999.000000       0.041000
56164     56164     sichuan        100.9833       32.2667          111       124     2012      01        13        013              0.004667      -2.567352       0.000000       0.136662   -9999.000000   -9999.000000       0.023800       0.122000
56164     56164     sichuan        100.9833       32.2667          111       124     2012      01        14        014              0.005208      -2.593842       0.000000       0.130500   -9999.000000   -9999.000000       0.010000   -9999.000000
56164     56164     sichuan        100.9833       32.2667          111       124     2012      01        15        015              0.003292      -4.832520       0.000000       0.121627   -9999.000000   -9999.000000       0.026100       0.023000
56164     56164     sichuan        100.9833       32.2667          111       124     2012      01        16        016              0.004417      -6.347565       0.000000       0.101453   -9999.000000   -9999.000000       0.016400   -9999.000000
56164     56164     sichuan        100.9833       32.2667          111       124     2012      01        17        017              0.000000      -3.919739       0.000000       0.122765   -9999.000000   -9999.000000   -9999.000000       0.162000
56164     56164     sichuan        100.9833       32.2667          111       124     2012      01        18        018              0.005750      -2.910095       0.000000       0.133973   -9999.000000   -9999.000000   -9999.000000   -9999.000000
56164     56164     sichuan        100.9833       32.2667          111       124     2012      01        19        019              0.005091      -2.903320       0.000000       0.136438   -9999.000000   -9999.000000       0.027700       0.041000
56164     56164     sichuan        100.9833       32.2667          111       124     2012      01        20        020              0.005222      -2.149750       0.000000       0.144437   -9999.000000   -9999.000000       0.011500       0.015000
56164     56164     sichuan        100.9833       32.2667          111       124     2012      01        21        021              0.003958      -2.446991       0.000000       0.138767   -9999.000000   -9999.000000       0.027500   -9999.000000
56164     56164     sichuan        100.9833       32.2667          111       124     2012      01        22        022              0.003542      -3.648926       0.000000       0.119987   -9999.000000   -9999.000000       0.014600       0.183000
56164     56164     sichuan        100.9833       32.2667          111       124     2012      01        23        023              0.005000      -4.394501       0.000000       0.117345   -9999.000000   -9999.000000   -9999.000000   -9999.000000
56164     56164     sichuan        100.9833       32.2667          111       124     2012      01        24        024              0.005625      -2.932678       0.000000       0.132761   -9999.000000   -9999.000000       0.015000       0.029000
56164     56164     sichuan        100.9833       32.2667          111       124     2012      01        25        025              0.006417      -2.599976       0.000000       0.147387   -9999.000000   -9999.000000       0.033500       0.034000
56164     56164     sichuan        100.9833       32.2667          111       124     2012      01        26        026              0.006917      -2.630859       0.742824       0.146514   -9999.000000   -9999.000000       0.017900   -9999.000000
56164     56164     sichuan        100.9833       32.2667          111       124     2012      01        27        027              0.005500      -2.038696       0.000000       0.152819   -9999.000000   -9999.000000       0.021900       0.206000
56164     56164     sichuan        100.9833       32.2667          111       124     2012      01        28        028              0.007250      -1.151184       0.000000       0.157988   -9999.000000   -9999.000000   -9999.000000   -9999.000000
56164     56164     sichuan        100.9833       32.2667          111       124     2012      01        29        029              0.007458      -0.949249       0.000000       0.163646   -9999.000000   -9999.000000   -9999.000000       0.157000
56164     56164     sichuan        100.9833       32.2667          111       124     2012      01        30        030              0.007750      -0.576019       0.000000       0.164634   -9999.000000   -9999.000000       0.033700   -9999.000000
56164     56164     sichuan        100.9833       32.2667          111       124     2012      01        31        031              0.007292      -1.619843       0.000000       0.158259   -9999.000000   -9999.000000       0.020900   -9999.000000
56164     56164     sichuan        100.9833       32.2667          111       124     2012      02        01        032              0.008167      -2.347321       0.000000       0.148708   -9999.000000   -9999.000000   -9999.000000       0.300000
56164     56164     sichuan        100.9833       32.2667          111       124     2012      02        02        033              0.006000      -1.445465       0.000000       0.156734   -9999.000000   -9999.000000       0.025200   -9999.000000
56164     56164     sichuan        100.9833       32.2667          111       124     2012      02        03        034              0.006375      -2.616638       0.000000       0.148255   -9999.000000   -9999.000000   -9999.000000       0.167000
56164     56164     sichuan        100.9833       32.2667          111       124     2012      02        04        035              0.008833      -2.116119       0.000000       0.148599   -9999.000000   -9999.000000   -9999.000000   -9999.000000
56164     56164     sichuan        100.9833       32.2667          111       124     2012      02        05        036              0.007917      -0.941437       0.000000       0.162164   -9999.000000   -9999.000000       0.038900   -9999.000000
56164     56164     sichuan        100.9833       32.2667          111       124     2012      02        06        037              0.007958      -0.697510       0.000000       0.164750   -9999.000000   -9999.000000       0.027300       0.291000
56164     56164     sichuan        100.9833       32.2667          111       124     2012      02        07        038              0.011167      -1.037689       0.000000       0.163199       0.071000   -9999.000000       0.033800   -9999.000000
56164     56164     sichuan        100.9833       32.2667          111       124     2012      02        08        039              0.015375       0.262817       0.000000       0.171305   -9999.000000   -9999.000000       0.037200       0.257000
56164     56164     sichuan        100.9833       32.2667          111       124     2012      02        09        040              0.017958       1.844208       0.000000       0.188572   -9999.000000   -9999.000000   -9999.000000   -9999.000000
56164     56164     sichuan        100.9833       32.2667          111       124     2012      02        10        041              0.015917       2.265900       0.000000       0.203323   -9999.000000   -9999.000000       0.030600       0.018000
56164     56164     sichuan        100.9833       32.2667          111       124     2012      02        11        042              0.007875      -0.650055       0.000000       0.166091   -9999.000000   -9999.000000       0.045000       0.210000
56164     56164     sichuan        100.9833       32.2667          111       124     2012      02        12        043              0.005375      -0.573242       0.000000       0.165600   -9999.000000   -9999.000000       0.045400   -9999.000000
56164     56164     sichuan        100.9833       32.2667          111       124     2012      02        13        044              0.004875      -1.275909       0.000000       0.157916   -9999.000000   -9999.000000       0.028800       0.080000
56164     56164     sichuan        100.9833       32.2667          111       124     2012      02        14        045              0.006500      -1.537354       0.000000       0.157080   -9999.000000   -9999.000000   -9999.000000   -9999.000000
56164     56164     sichuan        100.9833       32.2667          111       124     2012      02        15        046              0.011625      -0.315765       0.000000       0.166827   -9999.000000   -9999.000000   -9999.000000       0.288000
56164     56164     sichuan        100.9833       32.2667          111       124     2012      02        16        047              0.016833       0.923340       0.000000       0.186955   -9999.000000   -9999.000000       0.037000   -9999.000000
56164     56164     sichuan        100.9833       32.2667          111       124     2012      02        17        048              0.019083       1.943024       0.000000       0.195326   -9999.000000   -9999.000000       0.025900       0.286000
56164     56164     sichuan        100.9833       32.2667          111       124     2012      02        18        049              0.017917       1.896454       0.000000       0.194041   -9999.000000   -9999.000000   -9999.000000       0.080000
56164     56164     sichuan        100.9833       32.2667          111       124     2012      02        19        050              0.011708      -0.716583       0.000000       0.169156   -9999.000000   -9999.000000       0.029500   -9999.000000
56164     56164     sichuan        100.9833       32.2667          111       124     2012      02        20        051              0.012000      -0.421295       0.000000       0.166699       0.079000   -9999.000000   -9999.000000       0.201000
56164     56164     sichuan        100.9833       32.2667          111       124     2012      02        21        052              0.015478       0.646088       0.000000       0.173583   -9999.000000   -9999.000000   -9999.000000   -9999.000000
56164     56164     sichuan        100.9833       32.2667          111       124     2012      02        22        053              0.017609       1.652283       0.000000       0.187680   -9999.000000   -9999.000000       0.040700       0.190000
56164     56164     sichuan        100.9833       32.2667          111       124     2012      02        23        054              0.018826       1.518799       0.000000       0.190042   -9999.000000   -9999.000000       0.029800       0.033000
56164     56164     sichuan        100.9833       32.2667          111       124     2012      02        24        055              0.020958       1.953339       0.000000       0.192804   -9999.000000   -9999.000000       0.034300   -9999.000000
56164     56164     sichuan        100.9833       32.2667          111       124     2012      02        25        056              0.022875       3.217346       0.283606       0.197872   -9999.000000   -9999.000000       0.034200       0.327000
56164     56164     sichuan        100.9833       32.2667          111       124     2012      02        26        057              0.024125       2.575012       0.000000       0.194124   -9999.000000   -9999.000000   -9999.000000   -9999.000000
56164     56164     sichuan        100.9833       32.2667          111       124     2012      02        27        058              0.024364       1.713898       0.000000       0.197832   -9999.000000   -9999.000000       0.023500       0.261000
56164     56164     sichuan        100.9833       32.2667          111       124     2012      02        28        059              0.024130       1.692688       0.285440       0.190670       0.056000   -9999.000000       0.032600   -9999.000000
56164     56164     sichuan        100.9833       32.2667          111       124     2012      02        29        060              0.000000   -9999.000000       0.000000   -9999.000000   -9999.000000   -9999.000000   -9999.000000   -9999.000000
56164     56164     sichuan        100.9833       32.2667          111       124     2012      03        01        061              0.021739       3.118622       0.000000       0.211387   -9999.000000   -9999.000000       0.024400       0.209000
56164     56164     sichuan        100.9833       32.2667          111       124     2012      03        02        062              0.020667       1.536072       0.000000       0.194459   -9999.000000   -9999.000000   -9999.000000   -9999.000000
56164     56164     sichuan        100.9833       32.2667          111       124     2012      03        03        063              0.019417       1.326935       0.000000       0.188825   -9999.000000   -9999.000000   -9999.000000       0.205000
56164     56164     sichuan        100.9833       32.2667          111       124     2012      03        04        064              0.018417       0.732483       0.000000       0.179513   -9999.000000   -9999.000000       0.034500   -9999.000000
56164     56164     sichuan        100.9833       32.2667          111       124     2012      03        05        065              0.018667       0.051422       0.242746       0.172327   -9999.000000   -9999.000000       0.025600   -9999.000000
56164     56164     sichuan        100.9833       32.2667          111       124     2012      03        06        066              0.018250       1.913361       0.158203       0.188675   -9999.000000   -9999.000000       0.038400       0.429000
56164     56164     sichuan        100.9833       32.2667          111       124     2012      03        07        067              0.000000       2.877808       0.257419       0.197713   -9999.000000   -9999.000000       0.035700   -9999.000000
56164     56164     sichuan        100.9833       32.2667          111       124     2012      03        08        068              0.020208       4.011810       0.501562       0.220721   -9999.000000   -9999.000000   -9999.000000       0.240000
56164     56164     sichuan        100.9833       32.2667          111       124     2012      03        09        069              0.019583       4.213562       0.000000       0.223304   -9999.000000   -9999.000000   -9999.000000   -9999.000000
56164     56164     sichuan        100.9833       32.2667          111       124     2012      03        10        070              0.019250       1.775116       1.021766       0.194435   -9999.000000   -9999.000000       0.035700       0.456000
56164     56164     sichuan        100.9833       32.2667          111       124     2012      03        11        071              0.020667       3.393402       0.000000       0.213142   -9999.000000   -9999.000000       0.024100       0.407000
56164     56164     sichuan        100.9833       32.2667          111       124     2012      03        12        072              0.020250       3.682190       0.000000       0.216228   -9999.000000   -9999.000000       0.034000   -9999.000000
56164     56164     sichuan        100.9833       32.2667          111       124     2012      03        13        073              0.020167       2.732086       0.480311       0.203565       0.075000   -9999.000000   -9999.000000       0.399000
56164     56164     sichuan        100.9833       32.2667          111       124     2012      03        14        074              0.020333       5.489044       0.000000       0.225640       0.069000   -9999.000000   -9999.000000   -9999.000000
56164     56164     sichuan        100.9833       32.2667          111       124     2012      03        15        075              0.020583       5.675385       0.000000       0.233634   -9999.000000   -9999.000000       0.035100       0.468000
56164     56164     sichuan        100.9833       32.2667          111       124     2012      03        16        076              0.020000       5.596100       0.000000       0.232174   -9999.000000   -9999.000000       0.036100   -9999.000000
56164     56164     sichuan        100.9833       32.2667          111       124     2012      03        17        077              0.000000       4.126648       0.497168       0.210801       0.080000   -9999.000000       0.026600       0.407000
56164     56164     sichuan        100.9833       32.2667          111       124     2012      03        18        078              0.000000       4.277679       0.000000       0.202175       0.079000   -9999.000000       0.038200       0.241000
56164     56164     sichuan        100.9833       32.2667          111       124     2012      03        19        079              0.000000       4.279968       0.000000       0.205550       0.074000   -9999.000000   -9999.000000   -9999.000000
56164     56164     sichuan        100.9833       32.2667          111       124     2012      03        20        080              0.000000       5.392487       0.000000       0.210329       0.072000   -9999.000000   -9999.000000       0.526000
56164     56164     sichuan        100.9833       32.2667          111       124     2012      03        21        081              0.000000       6.481445       0.000000       0.223361   -9999.000000   -9999.000000       0.041400   -9999.000000
56164     56164     sichuan        100.9833       32.2667          111       124     2012      03        22        082              0.000000       7.322693       0.000000       0.234499   -9999.000000   -9999.000000       0.033800       0.303000
56164     56164     sichuan        100.9833       32.2667          111       124     2012      03        23        083              0.000000       6.443695       0.000000       0.231922       0.094000   -9999.000000       0.049300       0.167000
56164     56164     sichuan        100.9833       32.2667          111       124     2012      03        24        084              0.000000       3.306519       0.000000       0.216545       0.091000   -9999.000000       0.047700   -9999.000000
56164     56164     sichuan        100.9833       32.2667          111       124     2012      03        25        085              0.000000       4.096436       0.000000       0.216249       0.088000   -9999.000000   -9999.000000       0.516000
56164     56164     sichuan        100.9833       32.2667          111       124     2012      03        26        086              0.000000       3.947479       0.000000       0.220237   -9999.000000   -9999.000000   -9999.000000   -9999.000000
56164     56164     sichuan        100.9833       32.2667          111       124     2012      03        27        087              0.020000       6.352325       0.000000       0.234983   -9999.000000   -9999.000000       0.047400       0.470000
56164     56164     sichuan        100.9833       32.2667          111       124     2012      03        28        088              0.020500       7.955933       0.351677       0.239728       0.103000   -9999.000000       0.037700   -9999.000000
56164     56164     sichuan        100.9833       32.2667          111       124     2012      03        29        089              0.017417       9.701874       0.405713       0.238562   -9999.000000   -9999.000000       0.050500   -9999.000000
56164     56164     sichuan        100.9833       32.2667          111       124     2012      03        30        090              0.017000       5.043274       0.576233       0.239960   -9999.000000   -9999.000000   -9999.000000       0.517000
56164     56164     sichuan        100.9833       32.2667          111       124     2012      03        31        091              0.017583       3.951843       2.678837       0.219821   -9999.000000   -9999.000000   -9999.000000   -9999.000000
56164     56164     sichuan        100.9833       32.2667          111       124     2012      04        01        092              0.017875       2.906250       0.000000       0.199472   -9999.000000   -9999.000000       0.042600       0.561000
56164     56164     sichuan        100.9833       32.2667          111       124     2012      04        02        093              0.019000       4.614197       1.064587       0.214646       0.111000   -9999.000000       0.043200   -9999.000000
56164     56164     sichuan        100.9833       32.2667          111       124     2012      04        03        094              0.019792       8.190826       0.000000       0.228737       0.120000   -9999.000000       0.059500   -9999.000000
56164     56164     sichuan        100.9833       32.2667          111       124     2012      04        04        095              0.020125      10.804077       2.140909       0.232835   -9999.000000   -9999.000000       0.055700       0.798000
56164     56164     sichuan        100.9833       32.2667          111       124     2012      04        05        096              0.019917       9.366302       2.747168       0.234879   -9999.000000   -9999.000000   -9999.000000   -9999.000000
56164     56164     sichuan        100.9833       32.2667          111       124     2012      04        06        097              0.020417       5.284790       0.681676       0.235678   -9999.000000   -9999.000000   -9999.000000       0.708000
56164     56164     sichuan        100.9833       32.2667          111       124     2012      04        07        098              0.021875       5.483276       0.442809       0.238908   -9999.000000   -9999.000000       0.038700   -9999.000000
56164     56164     sichuan        100.9833       32.2667          111       124     2012      04        08        099              0.029250       4.886627       0.000000       0.240605       0.129000   -9999.000000       0.025700       0.602000
56164     56164     sichuan        100.9833       32.2667          111       124     2012      04        09        100              0.037667       5.440552       0.261808       0.239390   -9999.000000   -9999.000000       0.044300       0.670000
56164     56164     sichuan        100.9833       32.2667          111       124     2012      04        10        101              0.038042       7.220490       0.517142       0.235673       0.099000   -9999.000000       0.041300   -9999.000000
56164     56164     sichuan        100.9833       32.2667          111       124     2012      04        11        102              0.037667       8.955780       0.076492       0.238171   -9999.000000   -9999.000000   -9999.000000       0.713000
56164     56164     sichuan        100.9833       32.2667          111       124     2012      04        12        103              0.035500      10.975647       0.981232       0.236020   -9999.000000   -9999.000000       0.022700   -9999.000000
56164     56164     sichuan        100.9833       32.2667          111       124     2012      04        13        104              0.034792       6.711426       0.931999       0.240310   -9999.000000   -9999.000000       0.028600       0.595000
56164     56164     sichuan        100.9833       32.2667          111       124     2012      04        14        105              0.034417       7.957611       0.479871       0.239877       0.114000   -9999.000000       0.022900   -9999.000000
56164     56164     sichuan        100.9833       32.2667          111       124     2012      04        15        106              0.033542       9.403381       0.793499       0.239132   -9999.000000   -9999.000000       0.045300       0.672000
56164     56164     sichuan        100.9833       32.2667          111       124     2012      04        16        107              0.033958       8.224762       0.491344       0.240430   -9999.000000   -9999.000000   -9999.000000       0.510000
56164     56164     sichuan        100.9833       32.2667          111       124     2012      04        17        108              0.033833       7.723419       0.193880       0.242453   -9999.000000   -9999.000000   -9999.000000   -9999.000000
56164     56164     sichuan        100.9833       32.2667          111       124     2012      04        18        109              0.034292       5.473999       0.024314       0.237607       0.098000   -9999.000000   -9999.000000       0.677000
56164     56164     sichuan        100.9833       32.2667          111       124     2012      04        19        110              0.033875       7.580109       0.093115       0.238223   -9999.000000   -9999.000000       0.013200   -9999.000000
56164     56164     sichuan        100.9833       32.2667          111       124     2012      04        20        111              0.033542       6.515656       0.778488       0.232250       0.097000   -9999.000000   -9999.000000       0.516000
56164     56164     sichuan        100.9833       32.2667          111       124     2012      04        21        112              0.033375       7.346954       0.651165       0.227966   -9999.000000   -9999.000000       0.037400       0.608000
56164     56164     sichuan        100.9833       32.2667          111       124     2012      04        22        113              0.033333       9.081238       0.103429       0.233208   -9999.000000   -9999.000000   -9999.000000   -9999.000000
56164     56164     sichuan        100.9833       32.2667          111       124     2012      04        23        114              0.032917      11.688660       0.245703       0.231630       0.120000   -9999.000000   -9999.000000       0.550000
56164     56164     sichuan        100.9833       32.2667          111       124     2012      04        24        115              0.032750      11.454437       3.967252       0.230693   -9999.000000   -9999.000000       0.029100   -9999.000000
56164     56164     sichuan        100.9833       32.2667          111       124     2012      04        25        116              0.000000       9.995575       0.352474       0.229105       0.099000   -9999.000000       0.023900       0.590000
56164     56164     sichuan        100.9833       32.2667          111       124     2012      04        26        117              0.031458      10.347076       0.342759       0.223611       0.097000   -9999.000000       0.045400   -9999.000000
56164     56164     sichuan        100.9833       32.2667          111       124     2012      04        27        118              0.030333      10.422089       0.503756       0.222795   -9999.000000   -9999.000000       0.042100   -9999.000000
56164     56164     sichuan        100.9833       32.2667          111       124     2012      04        28        119              0.030042      10.084991       0.199011       0.223696   -9999.000000   -9999.000000   -9999.000000       0.645000
56164     56164     sichuan        100.9833       32.2667          111       124     2012      04        29        120              0.029083      11.478119       0.365137       0.222376       0.109000   -9999.000000       0.028400   -9999.000000
56164     56164     sichuan        100.9833       32.2667          111       124     2012      04        30        121              0.028625      10.279694       3.623340       0.225466       0.103000   -9999.000000       0.045400       0.516000
56164     56164     sichuan        100.9833       32.2667          111       124     2012      05        01        122              0.028375      11.480927       0.372439       0.235134       0.126000   -9999.000000       0.037000   -9999.000000
56164     56164     sichuan        100.9833       32.2667          111       124     2012      05        02        123              0.028833       9.452240       2.194580       0.245060   -9999.000000   -9999.000000       0.053400   -9999.000000
56164     56164     sichuan        100.9833       32.2667          111       124     2012      05        03        124              0.028708      11.386658       4.737061       0.247956   -9999.000000   -9999.000000   -9999.000000       0.689000
56164     56164     sichuan        100.9833       32.2667          111       124     2012      05        04        125              0.028458      12.092285       0.322133       0.246070       0.133000   -9999.000000   -9999.000000   -9999.000000
56164     56164     sichuan        100.9833       32.2667          111       124     2012      05        05        126              0.027917      13.226074       0.000000       0.240952       0.119000   -9999.000000       0.041100       0.700000
56164     56164     sichuan        100.9833       32.2667          111       124     2012      05        06        127              0.026542      14.814880       0.444821       0.230517       0.115000   -9999.000000       0.042100   -9999.000000
56164     56164     sichuan        100.9833       32.2667          111       124     2012      05        07        128              0.024958      16.085632       2.582639       0.222826   -9999.000000   -9999.000000       0.054200       0.714000
56164     56164     sichuan        100.9833       32.2667          111       124     2012      05        08        129              0.023875      16.194977       7.464757       0.213519   -9999.000000   -9999.000000       0.053600       0.618000
56164     56164     sichuan        100.9833       32.2667          111       124     2012      05        09        130              0.022792      14.191376       1.929999       0.211745       0.119000       0.177000   -9999.000000   -9999.000000
56164     56164     sichuan        100.9833       32.2667          111       124     2012      05        10        131              0.021750      14.919098       0.053328       0.206935       0.111500   -9999.000000   -9999.000000       0.658000
56164     56164     sichuan        100.9833       32.2667          111       124     2012      05        11        132              0.020125      17.477966       1.212927       0.199052   -9999.000000       0.203500       0.050200   -9999.000000
56164     56164     sichuan        100.9833       32.2667          111       124     2012      05        12        133              0.018917      14.536743       1.222762       0.208130   -9999.000000   -9999.000000       0.047600       0.514000
56164     56164     sichuan        100.9833       32.2667          111       124     2012      05        13        134              0.018375      12.833588       0.384902       0.218915       0.137000   -9999.000000       0.053600   -9999.000000
56164     56164     sichuan        100.9833       32.2667          111       124     2012      05        14        135              0.016833      13.220154       5.123087       0.215936       0.135000       0.136200       0.061700       0.664000
56164     56164     sichuan        100.9833       32.2667          111       124     2012      05        15        136              0.016750      10.770599       9.807723       0.235263       0.132000   -9999.000000   -9999.000000       0.594000
56164     56164     sichuan        100.9833       32.2667          111       124     2012      05        16        137              0.016917      11.372589       6.439038       0.263081       0.155000   -9999.000000       0.061300   -9999.000000
56164     56164     sichuan        100.9833       32.2667          111       124     2012      05        17        138              0.017708      10.511627       1.432497       0.283760       0.149000   -9999.000000       0.059700       0.699000
56164     56164     sichuan        100.9833       32.2667          111       124     2012      05        18        139              0.018667      12.318420       3.957361       0.277735   -9999.000000   -9999.000000       0.053200   -9999.000000
56164     56164     sichuan        100.9833       32.2667          111       124     2012      05        19        140              0.018000      13.658081       7.225709       0.263242       0.129000   -9999.000000       0.063700       0.693000
56164     56164     sichuan        100.9833       32.2667          111       124     2012      05        20        141              0.016708      16.046753       1.025339       0.253494       0.134000   -9999.000000   -9999.000000       0.620000
56164     56164     sichuan        100.9833       32.2667          111       124     2012      05        21        142              0.015875      17.030914       1.452527       0.245789       0.123000   -9999.000000   -9999.000000   -9999.000000
56164     56164     sichuan        100.9833       32.2667          111       124     2012      05        22        143              0.015583      17.791718       4.555282       0.241210       0.096000       0.203100       0.091200       0.744000
56164     56164     sichuan        100.9833       32.2667          111       124     2012      05        23        144              0.016167      14.770294       5.443769       0.263941   -9999.000000   -9999.000000       0.093200   -9999.000000
56164     56164     sichuan        100.9833       32.2667          111       124     2012      05        24        145              0.018583      15.430878       8.308349       0.272892       0.136000       0.207100       0.101000       0.771000
56164     56164     sichuan        100.9833       32.2667          111       124     2012      05        25        146              0.000000      12.657745       0.486586       0.286928       0.145000   -9999.000000       0.101400   -9999.000000
56164     56164     sichuan        100.9833       32.2667          111       124     2012      05        26        147              0.025292      14.225861       0.673920       0.274061       0.140500   -9999.000000   -9999.000000   -9999.000000
56164     56164     sichuan        100.9833       32.2667          111       124     2012      05        27        148              0.024417      15.918304       6.998641       0.259346       0.107000       0.275600   -9999.000000       0.771000
56164     56164     sichuan        100.9833       32.2667          111       124     2012      05        28        149              0.022542      16.335388       2.709703       0.275121   -9999.000000   -9999.000000   -9999.000000   -9999.000000
56164     56164     sichuan        100.9833       32.2667          111       124     2012      05        29        150              0.020333      15.980011       1.880354       0.273310   -9999.000000       0.230800       0.085700       0.952000
56164     56164     sichuan        100.9833       32.2667          111       124     2012      05        30        151              0.027583      15.810852      23.682060       0.264655       0.141500   -9999.000000       0.080300   -9999.000000
56164     56164     sichuan        100.9833       32.2667          111       124     2012      05        31        152              0.056292      14.995514       8.833161       0.302018       0.141500   -9999.000000       0.092100   -9999.000000
56164     56164     sichuan        100.9833       32.2667          111       124     2012      06        01        153              0.058458      12.514374       2.533251       0.314699       0.206000   -9999.000000   -9999.000000       0.971000
56164     56164     sichuan        100.9833       32.2667          111       124     2012      06        02        154              0.079875      15.338562      37.819653       0.293106   -9999.000000   -9999.000000       0.091300   -9999.000000
56164     56164     sichuan        100.9833       32.2667          111       124     2012      06        03        155              0.093375      13.234161       6.301847       0.328728       0.236000   -9999.000000       0.095700       0.824000
56164     56164     sichuan        100.9833       32.2667          111       124     2012      06        04        156              0.096333      11.239349      17.504217       0.322753       0.241000   -9999.000000       0.078000   -9999.000000
56164     56164     sichuan        100.9833       32.2667          111       124     2012      06        05        157              0.088167      11.400269       1.207924       0.325199       0.234500   -9999.000000       0.078100       1.000000
56164     56164     sichuan        100.9833       32.2667          111       124     2012      06        06        158              0.089833      15.188232      15.467457       0.307720       0.236000   -9999.000000   -9999.000000       0.977000
56164     56164     sichuan        100.9833       32.2667          111       124     2012      06        07        159              0.086833      13.951294      13.195851       0.318755       0.216000   -9999.000000   -9999.000000   -9999.000000
56164     56164     sichuan        100.9833       32.2667          111       124     2012      06        08        160              0.096750      15.914825      10.662645       0.313596   -9999.000000       0.482700       0.076400       0.977000
56164     56164     sichuan        100.9833       32.2667          111       124     2012      06        09        161              0.104458      14.321045      20.124382       0.322572       0.239000       0.189700       0.071900   -9999.000000
56164     56164     sichuan        100.9833       32.2667          111       124     2012      06        10        162              0.108708      13.817505      19.697693       0.331125       0.228000   -9999.000000       0.077600       1.000000
56164     56164     sichuan        100.9833       32.2667          111       124     2012      06        11        163              0.000000      11.749420       5.944462       0.326357       0.268500   -9999.000000       0.092400   -9999.000000
56164     56164     sichuan        100.9833       32.2667          111       124     2012      06        12        164              0.100667      11.717133       5.756150       0.320644       0.252000   -9999.000000   -9999.000000       0.906000
56164     56164     sichuan        100.9833       32.2667          111       124     2012      06        13        165              0.099958      13.825592       2.345778       0.310246   -9999.000000   -9999.000000   -9999.000000       0.899000
56164     56164     sichuan        100.9833       32.2667          111       124     2012      06        14        166              0.091250      14.702911       5.539865       0.303624   -9999.000000   -9999.000000       0.088400   -9999.000000
56164     56164     sichuan        100.9833       32.2667          111       124     2012      06        15        167              0.097792      15.194183       2.973898       0.296597       0.251500   -9999.000000       0.079600       0.930000
56164     56164     sichuan        100.9833       32.2667          111       124     2012      06        16        168              0.106208      12.038574       8.383173       0.301914       0.234500   -9999.000000       0.086400   -9999.000000
56164     56164     sichuan        100.9833       32.2667          111       124     2012      06        17        169              0.094625      11.920532       2.655341       0.309027       0.246000   -9999.000000   -9999.000000       0.823000
56164     56164     sichuan        100.9833       32.2667          111       124     2012      06        18        170              0.090042      14.525757       1.774002       0.299427   -9999.000000   -9999.000000   -9999.000000       0.878000
56164     56164     sichuan        100.9833       32.2667          111       124     2012      06        19        171              0.087583      14.562622       2.655724       0.293479       0.235000       0.139700       0.126000   -9999.000000
56164     56164     sichuan        100.9833       32.2667          111       124     2012      06        20        172              0.084958      15.750580       3.462774       0.291678       0.247500   -9999.000000       0.130000       1.000000
56164     56164     sichuan        100.9833       32.2667          111       124     2012      06        21        173              0.086958      13.766632       4.794000       0.293910       0.262000   -9999.000000       0.133800   -9999.000000
56164     56164     sichuan        100.9833       32.2667          111       124     2012      06        22        174              0.085958      14.765015       0.119619       0.296960       0.214000       0.124800       0.128200       0.765000
56164     56164     sichuan        100.9833       32.2667          111       124     2012      06        23        175              0.080250      15.432068      11.618963       0.287920       0.265000       0.169400   -9999.000000   -9999.000000
56164     56164     sichuan        100.9833       32.2667          111       124     2012      06        24        176              0.085917      15.681366      17.834887       0.300498       0.266000   -9999.000000   -9999.000000   -9999.000000
56164     56164     sichuan        100.9833       32.2667          111       124     2012      06        25        177              0.096292      14.486572       2.087566       0.320413       0.264000   -9999.000000       0.158100       1.000000
56164     56164     sichuan        100.9833       32.2667          111       124     2012      06        26        178              0.094958      15.318481       5.416847       0.308337       0.266000   -9999.000000       0.151000   -9999.000000
56164     56164     sichuan        100.9833       32.2667          111       124     2012      06        27        179              0.104208      16.006195      24.100431       0.306103   -9999.000000       0.230400       0.158400       1.000000
56164     56164     sichuan        100.9833       32.2667          111       124     2012      06        28        180              0.109500      16.593079      19.422203       0.322755       0.222000       0.266800       0.136900   -9999.000000
56164     56164     sichuan        100.9833       32.2667          111       124     2012      06        29        181              0.124250      17.204437      34.880836       0.330868   -9999.000000       0.148900   -9999.000000   -9999.000000
56164     56164     sichuan        100.9833       32.2667          111       124     2012      06        30        182              0.112125      15.789124       2.626383       0.338741       0.238000   -9999.000000   -9999.000000   -9999.000000
56164     56164     sichuan        100.9833       32.2667          111       124     2012      07        01        183              0.107083      16.199280       4.009726       0.317354       0.336500       0.248300       0.153400   -9999.000000
56164     56164     sichuan        100.9833       32.2667          111       124     2012      07        02        184              0.106917      16.621674       7.183151       0.313148       0.312500       0.138700       0.106700       1.000000
56164     56164     sichuan        100.9833       32.2667          111       124     2012      07        03        185              0.114333      17.052185      15.432615       0.317123   -9999.000000   -9999.000000       0.100200   -9999.000000
56164     56164     sichuan        100.9833       32.2667          111       124     2012      07        04        186              0.106125      14.986908       0.913371       0.324725   -9999.000000       0.145600   -9999.000000       0.955000
56164     56164     sichuan        100.9833       32.2667          111       124     2012      07        05        187              0.094875      15.084717       1.397317       0.311026   -9999.000000   -9999.000000   -9999.000000       0.886000
56164     56164     sichuan        100.9833       32.2667          111       124     2012      07        06        188              0.093375      17.252686      11.895786       0.304378   -9999.000000   -9999.000000       0.111200   -9999.000000
56164     56164     sichuan        100.9833       32.2667          111       124     2012      07        07        189              0.105250      16.104767      35.120056       0.319823   -9999.000000       0.118600       0.107200       0.830000
56164     56164     sichuan        100.9833       32.2667          111       124     2012      07        08        190              0.109750      17.053040       2.225194       0.329187       0.310000   -9999.000000       0.108300   -9999.000000
56164     56164     sichuan        100.9833       32.2667          111       124     2012      07        09        191              0.103083      17.895813       3.899230       0.321876   -9999.000000       0.051900       0.085000       1.000000
56164     56164     sichuan        100.9833       32.2667          111       124     2012      07        10        192              0.098625      17.272034       0.530968       0.315683       0.327000   -9999.000000   -9999.000000   -9999.000000
56164     56164     sichuan        100.9833       32.2667          111       124     2012      07        11        193              0.093875      19.064545       5.908131       0.306993       0.293000   -9999.000000   -9999.000000       0.844000
56164     56164     sichuan        100.9833       32.2667          111       124     2012      07        12        194              0.100000      17.243439       1.953674       0.314068       0.280000   -9999.000000       0.090700       0.822000
56164     56164     sichuan        100.9833       32.2667          111       124     2012      07        13        195              0.096083      15.316803       0.948257       0.308813       0.266500   -9999.000000       0.083600   -9999.000000
56164     56164     sichuan        100.9833       32.2667          111       124     2012      07        14        196              0.106417      17.786774       9.446651       0.300572       0.241000   -9999.000000       0.092600       0.980000
56164     56164     sichuan        100.9833       32.2667          111       124     2012      07        15        197              0.111875      14.356384       3.399983       0.316055   -9999.000000       0.153800       0.087800   -9999.000000
56164     56164     sichuan        100.9833       32.2667          111       124     2012      07        16        198              0.120833      15.609436       5.497921       0.306731       0.276000       0.125000   -9999.000000       0.869000
56164     56164     sichuan        100.9833       32.2667          111       124     2012      07        17        199              0.116292      16.556824       6.609845       0.309922       0.275500       0.032400       0.163100   -9999.000000
56164     56164     sichuan        100.9833       32.2667          111       124     2012      07        18        200              0.130000      16.017578       8.834068       0.311663       0.282500   -9999.000000       0.175000   -9999.000000
56164     56164     sichuan        100.9833       32.2667          111       124     2012      07        19        201              0.140958      15.869232      13.578476       0.314670   -9999.000000   -9999.000000       0.164400       1.000000
56164     56164     sichuan        100.9833       32.2667          111       124     2012      07        20        202              0.132875      16.621552       9.292690       0.321006   -9999.000000       0.056000       0.152100   -9999.000000
56164     56164     sichuan        100.9833       32.2667          111       124     2012      07        21        203              0.138435      17.049713       4.937098       0.318167       0.500000   -9999.000000   -9999.000000       1.000000
56164     56164     sichuan        100.9833       32.2667          111       124     2012      07        22        204              0.137958      16.192474      10.430179       0.314576       0.500000       0.324500   -9999.000000   -9999.000000
56164     56164     sichuan        100.9833       32.2667          111       124     2012      07        23        205              0.154458      14.429688      11.144167       0.315488       0.500000   -9999.000000       0.202600   -9999.000000
56164     56164     sichuan        100.9833       32.2667          111       124     2012      07        24        206              0.133750      14.092743       3.997467       0.323354       0.495000       0.162700       0.195300       1.000000
56164     56164     sichuan        100.9833       32.2667          111       124     2012      07        25        207              0.128958      15.579742       0.294299       0.312074       0.495000       0.260100       0.202300   -9999.000000
56164     56164     sichuan        100.9833       32.2667          111       124     2012      07        26        208              0.121625      16.618073      37.814896       0.305007   -9999.000000   -9999.000000       0.198900       0.842000
56164     56164     sichuan        100.9833       32.2667          111       124     2012      07        27        209              0.149333      17.992798       1.596335       0.321680       0.500000       0.081000   -9999.000000   -9999.000000
56164     56164     sichuan        100.9833       32.2667          111       124     2012      07        28        210              0.123708      16.300171       0.185192       0.321565       0.494000   -9999.000000   -9999.000000   -9999.000000
56164     56164     sichuan        100.9833       32.2667          111       124     2012      07        29        211              0.102458      17.534454       0.000000       0.308167       0.500000   -9999.000000       0.200000       0.892000
56164     56164     sichuan        100.9833       32.2667          111       124     2012      07        30        212              0.084833      18.593079       4.425524       0.303182       0.493000   -9999.000000       0.107000   -9999.000000
56164     56164     sichuan        100.9833       32.2667          111       124     2012      07        31        213              0.077708      17.750488       6.203616       0.307921   -9999.000000   -9999.000000       0.107600       0.909000
56164     56164     sichuan        100.9833       32.2667          111       124     2012      08        01        214              0.077042      14.920441       2.603241       0.312693       0.500000   -9999.000000       0.105400   -9999.000000
56164     56164     sichuan        100.9833       32.2667          111       124     2012      08        02        215              0.078625      15.499664       1.912533       0.306714       0.500000       0.320400   -9999.000000       0.958000
56164     56164     sichuan        100.9833       32.2667          111       124     2012      08        03        216              0.085875      15.813354       7.803601       0.302656       0.497500   -9999.000000       0.104800       1.000000
56164     56164     sichuan        100.9833       32.2667          111       124     2012      08        04        217              0.082542      16.022461       2.621208       0.310295       0.479000       0.183600       0.107500   -9999.000000
56164     56164     sichuan        100.9833       32.2667          111       124     2012      08        05        218              0.072292      16.954163       4.187040       0.304148   -9999.000000   -9999.000000       0.104200       0.782000
56164     56164     sichuan        100.9833       32.2667          111       124     2012      08        06        219              0.058250      17.971008       1.534545       0.300682       0.500000   -9999.000000       0.086200   -9999.000000
56164     56164     sichuan        100.9833       32.2667          111       124     2012      08        07        220              0.045208      18.747101       0.137482       0.294468       0.498000       0.218500   -9999.000000       0.927000
56164     56164     sichuan        100.9833       32.2667          111       124     2012      08        08        221              0.034875      18.997620       0.294902       0.287450       0.482000   -9999.000000   -9999.000000   -9999.000000
56164     56164     sichuan        100.9833       32.2667          111       124     2012      08        09        222              0.028667      19.444183       0.270291       0.282978       0.488000       0.107200       0.087300       0.758000
56164     56164     sichuan        100.9833       32.2667          111       124     2012      08        10        223              0.024458      19.764526       0.092751       0.280244       0.388000   -9999.000000       0.082700       0.611000
56164     56164     sichuan        100.9833       32.2667          111       124     2012      08        11        224              0.021125      19.854553       0.000000       0.278247   -9999.000000       0.215400       0.082200   -9999.000000
56164     56164     sichuan        100.9833       32.2667          111       124     2012      08        12        225              0.018667      19.990448       0.144803       0.274624       0.454000       0.128200       0.081200       0.755000
56164     56164     sichuan        100.9833       32.2667          111       124     2012      08        13        226              0.017542      20.226196       5.431276       0.272825       0.447000   -9999.000000   -9999.000000   -9999.000000
56164     56164     sichuan        100.9833       32.2667          111       124     2012      08        14        227              0.017000      18.171448       0.726676       0.287371       0.497000       0.034800   -9999.000000       0.682000
56164     56164     sichuan        100.9833       32.2667          111       124     2012      08        15        228              0.016750      18.082703       0.410826       0.285564       0.383000   -9999.000000       0.131900       0.509000
56164     56164     sichuan        100.9833       32.2667          111       124     2012      08        16        229              0.020375      18.225708       6.201604       0.281922   -9999.000000       0.183100       0.131000   -9999.000000
56164     56164     sichuan        100.9833       32.2667          111       124     2012      08        17        230              0.039417      18.648132      12.572838       0.290374       0.499000   -9999.000000       0.130400       1.000000
56164     56164     sichuan        100.9833       32.2667          111       124     2012      08        18        231              0.073167      17.296387      14.144808       0.310005       0.500000   -9999.000000   -9999.000000   -9999.000000
56164     56164     sichuan        100.9833       32.2667          111       124     2012      08        19        232              0.129208      15.690521      14.677271       0.320633       0.453500   -9999.000000   -9999.000000       0.839000
56164     56164     sichuan        100.9833       32.2667          111       124     2012      08        20        233              0.101250      13.948547       7.156707       0.324199       0.460000       0.252700       0.157600   -9999.000000
56164     56164     sichuan        100.9833       32.2667          111       124     2012      08        21        234              0.131583      16.249969      19.156372       0.304841   -9999.000000   -9999.000000       0.173600   -9999.000000
56164     56164     sichuan        100.9833       32.2667          111       124     2012      08        22        235              0.112958      11.724396       0.000000       0.328926   -9999.000000   -9999.000000       0.160800   -9999.000000
56164     56164     sichuan        100.9833       32.2667          111       124     2012      08        23        236              0.097792      13.291260       3.116797       0.302425       0.500000   -9999.000000       0.163700   -9999.000000
56164     56164     sichuan        100.9833       32.2667          111       124     2012      08        24        237              0.084000      15.358948       0.550243       0.294765       0.500000   -9999.000000   -9999.000000   -9999.000000
56164     56164     sichuan        100.9833       32.2667          111       124     2012      08        25        238              0.000000      15.876251       3.419715       0.291087       0.500000   -9999.000000   -9999.000000   -9999.000000
56164     56164     sichuan        100.9833       32.2667          111       124     2012      08        26        239              0.071167      13.867157       0.000000       0.296996       0.500000   -9999.000000       0.167700   -9999.000000
56164     56164     sichuan        100.9833       32.2667          111       124     2012      08        27        240              0.064958      15.387024       5.543171       0.287840   -9999.000000       0.040300       0.190500       0.884000
56164     56164     sichuan        100.9833       32.2667          111       124     2012      08        28        241              0.060875      15.400513       1.671633       0.298569       0.500000   -9999.000000       0.195300   -9999.000000
56164     56164     sichuan        100.9833       32.2667          111       124     2012      08        29        242              0.059417      16.467499       1.224576       0.290049       0.500000       0.296300       0.198300       0.874000
56164     56164     sichuan        100.9833       32.2667          111       124     2012      08        30        243              0.079708      14.421051      16.504745       0.291283       0.499000       0.183700   -9999.000000   -9999.000000
56164     56164     sichuan        100.9833       32.2667          111       124     2012      08        31        244              0.104042      15.400116      17.587025       0.317504       0.489000   -9999.000000   -9999.000000       0.914000
56164     56164     sichuan        100.9833       32.2667          111       124     2012      09        01        245              0.111958      15.665802       0.062491       0.320073       0.354000       0.361100       0.203000       0.814000
56164     56164     sichuan        100.9833       32.2667          111       124     2012      09        02        246              0.096500      13.304657       0.000000       0.307911       0.349000   -9999.000000       0.189000   -9999.000000
56164     56164     sichuan        100.9833       32.2667          111       124     2012      09        03        247              0.085125      13.195984       0.143148       0.293843   -9999.000000       0.325800       0.204800       0.615000
56164     56164     sichuan        100.9833       32.2667          111       124     2012      09        04        248              0.073708      13.214783       0.641307       0.288350       0.314500       0.262300   -9999.000000   -9999.000000
56164     56164     sichuan        100.9833       32.2667          111       124     2012      09        05        249              0.064167      13.938538       1.196439       0.284413       0.314500   -9999.000000   -9999.000000       0.669000
56164     56164     sichuan        100.9833       32.2667          111       124     2012      09        06        250              0.056292      13.997467       0.743017       0.285328       0.300000       0.134700       0.201900   -9999.000000
56164     56164     sichuan        100.9833       32.2667          111       124     2012      09        07        251              0.050792      14.955566       3.122873       0.284707   -9999.000000   -9999.000000       0.198900       0.744000
56164     56164     sichuan        100.9833       32.2667          111       124     2012      09        08        252              0.044458      15.048676       0.000000       0.291912       0.309000   -9999.000000       0.196500       0.559000
56164     56164     sichuan        100.9833       32.2667          111       124     2012      09        09        253              0.040292      15.883514       3.266345       0.284877       0.341000       0.247700       0.200000   -9999.000000
56164     56164     sichuan        100.9833       32.2667          111       124     2012      09        10        254              0.039083      15.066589       1.132508       0.290211       0.310500   -9999.000000   -9999.000000       0.692000
56164     56164     sichuan        100.9833       32.2667          111       124     2012      09        11        255              0.038333      14.358643       7.354487       0.290189       0.255000       0.252500   -9999.000000   -9999.000000
56164     56164     sichuan        100.9833       32.2667          111       124     2012      09        12        256              0.040833      14.631165       1.460473       0.295588   -9999.000000   -9999.000000       0.215100       0.679000
56164     56164     sichuan        100.9833       32.2667          111       124     2012      09        13        257              0.041125      12.093750       0.000000       0.293290   -9999.000000   -9999.000000       0.202500       0.593000
56164     56164     sichuan        100.9833       32.2667          111       124     2012      09        14        258              0.041583      11.637054       0.268381       0.284163       0.271500   -9999.000000       0.220100   -9999.000000
56164     56164     sichuan        100.9833       32.2667          111       124     2012      09        15        259              0.041917      11.353271       7.560247       0.280869       0.296500   -9999.000000       0.211500       0.829000
56164     56164     sichuan        100.9833       32.2667          111       124     2012      09        16        260              0.045333      12.172607       0.853405       0.291841       0.312500   -9999.000000   -9999.000000   -9999.000000
56164     56164     sichuan        100.9833       32.2667          111       124     2012      09        17        261              0.047792      11.311066       0.461950       0.295136       0.270000       0.134000   -9999.000000       0.738000
56164     56164     sichuan        100.9833       32.2667          111       124     2012      09        18        262              0.048667      13.041382       0.770658       0.286951   -9999.000000   -9999.000000       0.168300   -9999.000000
56164     56164     sichuan        100.9833       32.2667          111       124     2012      09        19        263              0.050125      12.184967      13.107816       0.286072       0.309000   -9999.000000       0.164500   -9999.000000
56164     56164     sichuan        100.9833       32.2667          111       124     2012      09        20        264              0.074500      14.380005      12.038664       0.302549   -9999.000000   -9999.000000       0.156100       0.966000
56164     56164     sichuan        100.9833       32.2667          111       124     2012      09        21        265              0.099667      14.240723       5.545867       0.319687   -9999.000000   -9999.000000   -9999.000000   -9999.000000
56164     56164     sichuan        100.9833       32.2667          111       124     2012      09        22        266              0.091333      13.721405      16.391426       0.310260       0.239000       0.296200   -9999.000000       0.973000
56164     56164     sichuan        100.9833       32.2667          111       124     2012      09        23        267              0.088000      15.109222       0.000000       0.314471   -9999.000000   -9999.000000       0.170000   -9999.000000
56164     56164     sichuan        100.9833       32.2667          111       124     2012      09        24        268              0.082042      13.945374      18.880386       0.302929   -9999.000000       0.301700       0.143200   -9999.000000
56164     56164     sichuan        100.9833       32.2667          111       124     2012      09        25        269              0.091708      14.283539       3.619701       0.314929       0.253500   -9999.000000       0.141000       0.981000
56164     56164     sichuan        100.9833       32.2667          111       124     2012      09        26        270              0.096833      11.666626       0.000000       0.313012       0.231000   -9999.000000       0.144600   -9999.000000
56164     56164     sichuan        100.9833       32.2667          111       124     2012      09        27        271              0.092429      12.291779       2.878726       0.300247       0.250000       0.198400   -9999.000000       0.776000
56164     56164     sichuan        100.9833       32.2667          111       124     2012      09        28        272              0.090200      11.802551       1.161257       0.299815       0.243000   -9999.000000   -9999.000000   -9999.000000
56164     56164     sichuan        100.9833       32.2667          111       124     2012      09        29        273              0.086625      12.694336       0.458938       0.294277       0.250000   -9999.000000       0.143100       0.857000
56164     56164     sichuan        100.9833       32.2667          111       124     2012      09        30        274              0.082250      11.681122       1.164542       0.292630   -9999.000000   -9999.000000       0.134500       0.812000
56164     56164     sichuan        100.9833       32.2667          111       124     2012      10        01        275              0.078542      11.442444       4.771411       0.291061       0.229000   -9999.000000       0.146400   -9999.000000
56164     56164     sichuan        100.9833       32.2667          111       124     2012      10        02        276              0.075500      12.016296       2.459312       0.298131       0.234000       0.211100       0.145400       0.744000
56164     56164     sichuan        100.9833       32.2667          111       124     2012      10        03        277              0.074750      12.798370       3.508523       0.295887   -9999.000000   -9999.000000   -9999.000000   -9999.000000
56164     56164     sichuan        100.9833       32.2667          111       124     2012      10        04        278              0.105875      11.114563      16.224436       0.300181   -9999.000000   -9999.000000       0.139200       0.911000
56164     56164     sichuan        100.9833       32.2667          111       124     2012      10        05        279              0.120833       8.490479       3.349056       0.319491   -9999.000000   -9999.000000       0.151000   -9999.000000
56164     56164     sichuan        100.9833       32.2667          111       124     2012      10        06        280              0.110625       7.821106       6.947079       0.312506   -9999.000000   -9999.000000       0.141000       0.860000
56164     56164     sichuan        100.9833       32.2667          111       124     2012      10        07        281              0.114250      10.566071       5.003592       0.309416       0.240000   -9999.000000       0.147400       0.744000
56164     56164     sichuan        100.9833       32.2667          111       124     2012      10        08        282              0.105875       9.893585       1.737375       0.309459       0.229000   -9999.000000   -9999.000000   -9999.000000
56164     56164     sichuan        100.9833       32.2667          111       124     2012      10        09        283              0.104250      10.253265       6.963652       0.301870   -9999.000000   -9999.000000   -9999.000000       0.887000
56164     56164     sichuan        100.9833       32.2667          111       124     2012      10        10        284              0.125500       9.029572       5.130455       0.307362   -9999.000000   -9999.000000       0.083400   -9999.000000
56164     56164     sichuan        100.9833       32.2667          111       124     2012      10        11        285              0.123833       7.964996       6.666049       0.310499       0.190000   -9999.000000       0.083800       0.689000
56164     56164     sichuan        100.9833       32.2667          111       124     2012      10        12        286              0.126333       9.323181       7.457563       0.309108       0.204000   -9999.000000       0.087600       0.729000
56164     56164     sichuan        100.9833       32.2667          111       124     2012      10        13        287              0.113458       7.614532       1.066181       0.314710       0.212000   -9999.000000       0.087300   -9999.000000
56164     56164     sichuan        100.9833       32.2667          111       124     2012      10        14        288              0.105792       7.916840       3.082335       0.303344       0.200000   -9999.000000   -9999.000000       0.783000
56164     56164     sichuan        100.9833       32.2667          111       124     2012      10        15        289              0.099375       7.892639       1.703845       0.301138   -9999.000000       0.101600   -9999.000000   -9999.000000
56164     56164     sichuan        100.9833       32.2667          111       124     2012      10        16        290              0.094333       7.864136       8.676305       0.299947   -9999.000000   -9999.000000       0.099000       0.540000
56164     56164     sichuan        100.9833       32.2667          111       124     2012      10        17        291              0.089417       6.634430       0.163572       0.293799       0.204000   -9999.000000       0.099000   -9999.000000
56164     56164     sichuan        100.9833       32.2667          111       124     2012      10        18        292              0.084875       7.434357       1.139753       0.290978       0.186000       0.130400       0.106000   -9999.000000
56164     56164     sichuan        100.9833       32.2667          111       124     2012      10        19        293              0.081208       7.998108       0.623339       0.291439       0.172000   -9999.000000       0.110000       0.787000
56164     56164     sichuan        100.9833       32.2667          111       124     2012      10        20        294              0.077333       7.785889       0.151758       0.291715   -9999.000000   -9999.000000   -9999.000000   -9999.000000
56164     56164     sichuan        100.9833       32.2667          111       124     2012      10        21        295              0.073583       7.364746       0.956140       0.288904   -9999.000000   -9999.000000       0.092400       0.695000
56164     56164     sichuan        100.9833       32.2667          111       124     2012      10        22        296              0.069875       8.387177       1.003304       0.289596   -9999.000000   -9999.000000       0.070300   -9999.000000
56164     56164     sichuan        100.9833       32.2667          111       124     2012      10        23        297              0.068208       8.710876       8.578518       0.289685   -9999.000000   -9999.000000       0.067500   -9999.000000
56164     56164     sichuan        100.9833       32.2667          111       124     2012      10        24        298              0.069667       6.465271       2.471425       0.309134   -9999.000000   -9999.000000       0.073800       0.667000
56164     56164     sichuan        100.9833       32.2667          111       124     2012      10        25        299              0.000000       6.454742       2.004400       0.300261   -9999.000000   -9999.000000   -9999.000000   -9999.000000
56164     56164     sichuan        100.9833       32.2667          111       124     2012      10        26        300              0.074333       6.055511       3.890460       0.299404   -9999.000000   -9999.000000   -9999.000000       0.548000
56164     56164     sichuan        100.9833       32.2667          111       124     2012      10        27        301              0.074292       6.375427       7.396815       0.293029   -9999.000000   -9999.000000       0.069500   -9999.000000
56164     56164     sichuan        100.9833       32.2667          111       124     2012      10        28        302              0.000000       5.893250       0.758648       0.289207       0.157000   -9999.000000       0.066300       0.749000
56164     56164     sichuan        100.9833       32.2667          111       124     2012      10        29        303              0.070565       6.287628       2.229583       0.288312   -9999.000000   -9999.000000       0.064700       0.555000
56164     56164     sichuan        100.9833       32.2667          111       124     2012      10        30        304              0.069125       4.584290       3.938582       0.285448   -9999.000000       0.171200       0.060300   -9999.000000
56164     56164     sichuan        100.9833       32.2667          111       124     2012      10        31        305              0.067583       2.947968       1.557703       0.268228   -9999.000000   -9999.000000   -9999.000000       0.375000
56164     56164     sichuan        100.9833       32.2667          111       124     2012      11        01        306              0.065625       2.884918       1.329036       0.261898   -9999.000000       0.119000   -9999.000000   -9999.000000
56164     56164     sichuan        100.9833       32.2667          111       124     2012      11        02        307              0.064167       2.613892       2.432259       0.252544   -9999.000000   -9999.000000       0.059600       0.440000
56164     56164     sichuan        100.9833       32.2667          111       124     2012      11        03        308              0.062958       2.744812       1.403737       0.252380   -9999.000000   -9999.000000       0.055400   -9999.000000
56164     56164     sichuan        100.9833       32.2667          111       124     2012      11        04        309              0.061542       2.797089       0.533629       0.241248       0.132000       0.138800       0.059600       0.361000
56164     56164     sichuan        100.9833       32.2667          111       124     2012      11        05        310              0.060625       2.607941       1.250946       0.239362   -9999.000000   -9999.000000   -9999.000000       0.286000
56164     56164     sichuan        100.9833       32.2667          111       124     2012      11        06        311              0.059500       3.308319       1.233161       0.252976   -9999.000000   -9999.000000   -9999.000000   -9999.000000
56164     56164     sichuan        100.9833       32.2667          111       124     2012      11        07        312              0.058000       4.300323       2.250343       0.265829   -9999.000000   -9999.000000       0.067000       0.378000
56164     56164     sichuan        100.9833       32.2667          111       124     2012      11        08        313              0.056958       3.851257       1.129173       0.277774   -9999.000000   -9999.000000       0.062700   -9999.000000
56164     56164     sichuan        100.9833       32.2667          111       124     2012      11        09        314              0.055167       3.469727       0.200953       0.278213   -9999.000000       0.106400       0.073000       0.260000
56164     56164     sichuan        100.9833       32.2667          111       124     2012      11        10        315              0.053500       3.021729       0.765207       0.250731   -9999.000000   -9999.000000       0.067600       0.257000
56164     56164     sichuan        100.9833       32.2667          111       124     2012      11        11        316              0.052542       2.483917       0.330340       0.230001   -9999.000000   -9999.000000   -9999.000000   -9999.000000
56164     56164     sichuan        100.9833       32.2667          111       124     2012      11        12        317              0.052208       2.164398       0.460429       0.234532   -9999.000000       0.217800   -9999.000000       0.316000
56164     56164     sichuan        100.9833       32.2667          111       124     2012      11        13        318              0.000000       2.216339       0.543605       0.222249   -9999.000000   -9999.000000       0.063200   -9999.000000
56164     56164     sichuan        100.9833       32.2667          111       124     2012      11        14        319              0.050167       1.652863       0.605060       0.216458   -9999.000000   -9999.000000       0.059100       0.249000
56164     56164     sichuan        100.9833       32.2667          111       124     2012      11        15        320              0.048792       1.152679       0.262977       0.209451   -9999.000000   -9999.000000       0.065300   -9999.000000
56164     56164     sichuan        100.9833       32.2667          111       124     2012      11        16        321              0.048792       0.459137       0.000000       0.200572   -9999.000000   -9999.000000       0.058900   -9999.000000
56164     56164     sichuan        100.9833       32.2667          111       124     2012      11        17        322              0.000000       0.233704       2.980096       0.188382   -9999.000000   -9999.000000   -9999.000000       0.381000
56164     56164     sichuan        100.9833       32.2667          111       124     2012      11        18        323              0.045333      -0.296021       5.892675       0.180125   -9999.000000   -9999.000000       0.059100   -9999.000000
56164     56164     sichuan        100.9833       32.2667          111       124     2012      11        19        324              0.045417       0.316895       0.795075       0.188275       0.112000   -9999.000000       0.052100       0.331000
56164     56164     sichuan        100.9833       32.2667          111       124     2012      11        20        325              0.045625       0.989990       1.053718       0.199318   -9999.000000   -9999.000000       0.048100   -9999.000000
56164     56164     sichuan        100.9833       32.2667          111       124     2012      11        21        326              0.045792       0.973511       1.504181       0.207109   -9999.000000   -9999.000000       0.050900   -9999.000000
56164     56164     sichuan        100.9833       32.2667          111       124     2012      11        22        327              0.045333       1.802826       0.000000       0.220759   -9999.000000   -9999.000000   -9999.000000       0.307000
56164     56164     sichuan        100.9833       32.2667          111       124     2012      11        23        328              0.045000       0.872650       0.000000       0.213808   -9999.000000   -9999.000000   -9999.000000   -9999.000000
56164     56164     sichuan        100.9833       32.2667          111       124     2012      11        24        329              0.044708       1.070953       7.314616       0.207281   -9999.000000   -9999.000000       0.053200       0.242000
56164     56164     sichuan        100.9833       32.2667          111       124     2012      11        25        330              0.044583       1.795898       5.131248       0.242632   -9999.000000   -9999.000000       0.046700   -9999.000000
56164     56164     sichuan        100.9833       32.2667          111       124     2012      11        26        331              0.042875       0.782166       1.649439       0.244986   -9999.000000   -9999.000000       0.042800       0.121000
56164     56164     sichuan        100.9833       32.2667          111       124     2012      11        27        332              0.040708      -0.235107       0.717845       0.186839   -9999.000000   -9999.000000       0.042500       0.049000
56164     56164     sichuan        100.9833       32.2667          111       124     2012      11        28        333              0.041667       0.028442       1.570176       0.174078   -9999.000000   -9999.000000   -9999.000000   -9999.000000
56164     56164     sichuan        100.9833       32.2667          111       124     2012      11        29        334              0.036375      -0.691864       0.378433       0.175470   -9999.000000   -9999.000000   -9999.000000       0.090000
56164     56164     sichuan        100.9833       32.2667          111       124     2012      11        30        335              0.036542      -0.657196       0.772578       0.171703   -9999.000000   -9999.000000       0.047100   -9999.000000
56164     56164     sichuan        100.9833       32.2667          111       124     2012      12        01        336              0.039250       0.169891       4.950642       0.182456   -9999.000000   -9999.000000       0.040300       0.200000
56164     56164     sichuan        100.9833       32.2667          111       124     2012      12        02        337              0.031042      -1.317780       0.142296       0.167819   -9999.000000   -9999.000000       0.042300   -9999.000000
56164     56164     sichuan        100.9833       32.2667          111       124     2012      12        03        338              0.018917      -1.773193       1.311689       0.158327   -9999.000000   -9999.000000       0.050600       0.007000
56164     56164     sichuan        100.9833       32.2667          111       124     2012      12        04        339              0.013292      -1.988068       4.036737       0.154007   -9999.000000   -9999.000000   -9999.000000       0.153000
56164     56164     sichuan        100.9833       32.2667          111       124     2012      12        05        340              0.010833      -1.849731       4.603293       0.144466   -9999.000000   -9999.000000       0.048200   -9999.000000
56164     56164     sichuan        100.9833       32.2667          111       124     2012      12        06        341              0.012125      -1.618988       8.315978       0.157227   -9999.000000   -9999.000000       0.052800       0.252000
56164     56164     sichuan        100.9833       32.2667          111       124     2012      12        07        342              0.010667      -1.925629       3.558244       0.163559   -9999.000000   -9999.000000       0.048000   -9999.000000
56164     56164     sichuan        100.9833       32.2667          111       124     2012      12        08        343              0.010833      -2.230225       7.613951       0.146383   -9999.000000   -9999.000000       0.049400       0.076000
56164     56164     sichuan        100.9833       32.2667          111       124     2012      12        09        344              0.012417      -1.901428       6.438089       0.157697   -9999.000000   -9999.000000   -9999.000000       0.007000
56164     56164     sichuan        100.9833       32.2667          111       124     2012      12        10        345              0.014375      -1.197266       6.341373       0.161726   -9999.000000   -9999.000000   -9999.000000   -9999.000000
56164     56164     sichuan        100.9833       32.2667          111       124     2012      12        11        346              0.010792      -2.752869       1.747826       0.126460   -9999.000000   -9999.000000       0.049500       0.116000
56164     56164     sichuan        100.9833       32.2667          111       124     2012      12        12        347              0.009958      -3.547821       5.626122       0.131750   -9999.000000   -9999.000000       0.046100   -9999.000000
56164     56164     sichuan        100.9833       32.2667          111       124     2012      12        13        348              0.011208      -1.986603       6.457443       0.145626   -9999.000000   -9999.000000       0.048500       0.093000
56164     56164     sichuan        100.9833       32.2667          111       124     2012      12        14        349              0.012000      -1.946472       6.840355       0.147357   -9999.000000   -9999.000000       0.043800   -9999.000000
56164     56164     sichuan        100.9833       32.2667          111       124     2012      12        15        350              0.000000      -3.326202       3.826349       0.135283   -9999.000000   -9999.000000   -9999.000000   -9999.000000
56164     56164     sichuan        100.9833       32.2667          111       124     2012      12        16        351              0.010625      -3.241669       3.479445       0.129669   -9999.000000   -9999.000000   -9999.000000       0.120000
56164     56164     sichuan        100.9833       32.2667          111       124     2012      12        17        352              0.012167      -2.208618       3.909344       0.136667   -9999.000000   -9999.000000       0.060300   -9999.000000
56164     56164     sichuan        100.9833       32.2667          111       124     2012      12        18        353              0.011833      -2.728058       1.613915       0.121268   -9999.000000   -9999.000000       0.057600       0.016000
56164     56164     sichuan        100.9833       32.2667          111       124     2012      12        19        354              0.011625      -1.952515       0.000000       0.152168   -9999.000000   -9999.000000       0.054400   -9999.000000
56164     56164     sichuan        100.9833       32.2667          111       124     2012      12        20        355              0.000000      -1.868652       1.638668       0.150865   -9999.000000   -9999.000000   -9999.000000   -9999.000000
56164     56164     sichuan        100.9833       32.2667          111       124     2012      12        21        356              0.020000      -1.594666       2.021868       0.138459   -9999.000000   -9999.000000   -9999.000000       0.079000
56164     56164     sichuan        100.9833       32.2667          111       124     2012      12        22        357              0.016000      -2.270630       0.405961       0.151424   -9999.000000   -9999.000000       0.052300   -9999.000000
56164     56164     sichuan        100.9833       32.2667          111       124     2012      12        23        358              0.011583      -3.229279       0.428452       0.133647   -9999.000000   -9999.000000       0.058500       0.069000
56164     56164     sichuan        100.9833       32.2667          111       124     2012      12        24        359              0.009100      -4.435516       0.621139       0.127167   -9999.000000   -9999.000000       0.048600   -9999.000000
56164     56164     sichuan        100.9833       32.2667          111       124     2012      12        25        360              0.009083      -4.937988       0.148833       0.121431   -9999.000000   -9999.000000       0.046100       0.051000
56164     56164     sichuan        100.9833       32.2667          111       124     2012      12        26        361              0.000000      -3.690765       0.534755       0.122530   -9999.000000   -9999.000000   -9999.000000       0.015000
56164     56164     sichuan        100.9833       32.2667          111       124     2012      12        27        362              0.007818      -4.482758       0.000000       0.114471   -9999.000000   -9999.000000   -9999.000000   -9999.000000
56164     56164     sichuan        100.9833       32.2667          111       124     2012      12        28        363              0.007000      -4.203369       1.430601       0.121376   -9999.000000   -9999.000000       0.052400       0.016000
56164     56164     sichuan        100.9833       32.2667          111       124     2012      12        29        364              0.000000      -1.377350       0.265139       0.144972   -9999.000000   -9999.000000       0.047400   -9999.000000
56164     56164     sichuan        100.9833       32.2667          111       124     2012      12        30        365              0.000000      -4.590729       0.000000       0.108587   -9999.000000   -9999.000000       0.048100       0.059000
56164     56164     sichuan        100.9833       32.2667          111       124     2012      12        31        366              0.008200      -6.097961       0.000000       0.102201   -9999.000000   -9999.000000       0.037400   -9999.000000
