# Supplementary material for: Research on Fusing Multisatellite Soil Moisture Data Based on Bayesian Model Averaging
Source: Hindawi journal article supplement (doi:10.1155/2018/9310838), 2018-06-25
Supplement: f1 [file 9310838.f1.zip › 2012_sm00-10cm_daily_ZDB_ZHY_56168_366days_allin.txt]

56168     56168     sichuan        102.0667       31.4833          114       128     2012      01        01        001              0.000000   -9999.000000       0.000000   -9999.000000   -9999.000000   -9999.000000   -9999.000000   -9999.000000
56168     56168     sichuan        102.0667       31.4833          114       128     2012      01        02        002              0.051538      -1.438080       0.000000       0.149660   -9999.000000   -9999.000000       0.073200   -9999.000000
56168     56168     sichuan        102.0667       31.4833          114       128     2012      01        03        003              0.000000      -0.015778       0.000000       0.175046   -9999.000000   -9999.000000       0.055400   -9999.000000
56168     56168     sichuan        102.0667       31.4833          114       128     2012      01        04        004              0.058250      -2.114349       0.000000       0.132178   -9999.000000   -9999.000000       0.075000   -9999.000000
56168     56168     sichuan        102.0667       31.4833          114       128     2012      01        05        005              0.073083      -2.561432       0.000000       0.128272   -9999.000000   -9999.000000       0.053800       0.009000
56168     56168     sichuan        102.0667       31.4833          114       128     2012      01        06        006              0.082583      -3.229218       0.000000       0.124572   -9999.000000   -9999.000000   -9999.000000   -9999.000000
56168     56168     sichuan        102.0667       31.4833          114       128     2012      01        07        007              0.080792      -3.196350       0.000000       0.126391   -9999.000000   -9999.000000   -9999.000000   -9999.000000
56168     56168     sichuan        102.0667       31.4833          114       128     2012      01        08        008              0.000000      -3.089478       0.000000       0.127059   -9999.000000   -9999.000000       0.072500       0.033000
56168     56168     sichuan        102.0667       31.4833          114       128     2012      01        09        009              0.074292      -3.070160       0.000000       0.128193   -9999.000000   -9999.000000       0.045200   -9999.000000
56168     56168     sichuan        102.0667       31.4833          114       128     2012      01        10        010              0.155458      -1.999451       0.000000       0.137287   -9999.000000   -9999.000000   -9999.000000       0.064000
56168     56168     sichuan        102.0667       31.4833          114       128     2012      01        11        011              0.070208      -1.515381      54.207947       0.145006   -9999.000000   -9999.000000       0.029700   -9999.000000
56168     56168     sichuan        102.0667       31.4833          114       128     2012      01        12        012              0.067958      -1.492188       0.000000       0.147201   -9999.000000   -9999.000000   -9999.000000   -9999.000000
56168     56168     sichuan        102.0667       31.4833          114       128     2012      01        13        013              0.066333      -2.837341       0.000000       0.126556   -9999.000000   -9999.000000       0.027600       0.062000
56168     56168     sichuan        102.0667       31.4833          114       128     2012      01        14        014              0.062167      -2.888519       0.000000       0.124951   -9999.000000   -9999.000000       0.042700   -9999.000000
56168     56168     sichuan        102.0667       31.4833          114       128     2012      01        15        015              0.051250      -3.565582       0.000000       0.127286   -9999.000000   -9999.000000       0.025600       0.017000
56168     56168     sichuan        102.0667       31.4833          114       128     2012      01        16        016              0.045875      -4.157257       0.000000       0.116774   -9999.000000   -9999.000000       0.036500   -9999.000000
56168     56168     sichuan        102.0667       31.4833          114       128     2012      01        17        017              0.000000      -3.367310       0.000000       0.121233   -9999.000000   -9999.000000   -9999.000000       0.067000
56168     56168     sichuan        102.0667       31.4833          114       128     2012      01        18        018              0.058708      -1.790802       0.000000       0.142648   -9999.000000   -9999.000000   -9999.000000       0.085000
56168     56168     sichuan        102.0667       31.4833          114       128     2012      01        19        019              0.061042      -1.362091       0.569347       0.150300   -9999.000000   -9999.000000       0.053000   -9999.000000
56168     56168     sichuan        102.0667       31.4833          114       128     2012      01        20        020              0.059750      -0.985718       0.000000       0.156969   -9999.000000   -9999.000000       0.035100       0.010000
56168     56168     sichuan        102.0667       31.4833          114       128     2012      01        21        021              0.058417      -1.260742       5.056875       0.150845   -9999.000000   -9999.000000       0.056300   -9999.000000
56168     56168     sichuan        102.0667       31.4833          114       128     2012      01        22        022              0.055417      -1.344574       0.000000       0.148091   -9999.000000   -9999.000000       0.034500       0.040000
56168     56168     sichuan        102.0667       31.4833          114       128     2012      01        23        023              0.053542      -2.148621       0.000000       0.140058   -9999.000000   -9999.000000   -9999.000000   -9999.000000
56168     56168     sichuan        102.0667       31.4833          114       128     2012      01        24        024              0.054708      -1.803528       0.000000       0.143074   -9999.000000   -9999.000000   -9999.000000   -9999.000000
56168     56168     sichuan        102.0667       31.4833          114       128     2012      01        25        025              0.054292      -1.807495       0.000000       0.146506   -9999.000000   -9999.000000       0.046400       0.002000
56168     56168     sichuan        102.0667       31.4833          114       128     2012      01        26        026              0.055292      -1.403015       0.000000       0.152780   -9999.000000   -9999.000000       0.027900   -9999.000000
56168     56168     sichuan        102.0667       31.4833          114       128     2012      01        27        027              0.057583      -0.750519       0.000000       0.160856   -9999.000000   -9999.000000       0.033600       0.155000
56168     56168     sichuan        102.0667       31.4833          114       128     2012      01        28        028              0.059875      -0.220306       0.000000       0.169841   -9999.000000   -9999.000000   -9999.000000   -9999.000000
56168     56168     sichuan        102.0667       31.4833          114       128     2012      01        29        029              0.058208       0.439880       0.000000       0.179974   -9999.000000   -9999.000000   -9999.000000       0.019000
56168     56168     sichuan        102.0667       31.4833          114       128     2012      01        30        030              0.057292       0.378723       0.000000       0.179148   -9999.000000   -9999.000000       0.040700       0.024000
56168     56168     sichuan        102.0667       31.4833          114       128     2012      01        31        031              0.055417      -0.096405       0.000000       0.172931       0.144000   -9999.000000       0.049500   -9999.000000
56168     56168     sichuan        102.0667       31.4833          114       128     2012      02        01        032              0.054750      -0.285217       0.000000       0.169136   -9999.000000   -9999.000000       0.026700       0.263000
56168     56168     sichuan        102.0667       31.4833          114       128     2012      02        02        033              0.055083       0.095520       0.000000       0.175448   -9999.000000   -9999.000000       0.028800   -9999.000000
56168     56168     sichuan        102.0667       31.4833          114       128     2012      02        03        034              0.055625       0.217133       0.000000       0.178506   -9999.000000   -9999.000000   -9999.000000       0.063000
56168     56168     sichuan        102.0667       31.4833          114       128     2012      02        04        035              0.055125       0.176941       0.000000       0.175095       0.125000   -9999.000000   -9999.000000   -9999.000000
56168     56168     sichuan        102.0667       31.4833          114       128     2012      02        05        036              0.054083       1.049835       0.000000       0.189766   -9999.000000   -9999.000000       0.048300   -9999.000000
56168     56168     sichuan        102.0667       31.4833          114       128     2012      02        06        037              0.053875       0.914612       0.000000       0.189769   -9999.000000   -9999.000000       0.025700       0.281000
56168     56168     sichuan        102.0667       31.4833          114       128     2012      02        07        038              0.052458       0.849121       0.000000       0.190582   -9999.000000   -9999.000000       0.049600   -9999.000000
56168     56168     sichuan        102.0667       31.4833          114       128     2012      02        08        039              0.051750       1.886749       0.000000       0.200838   -9999.000000   -9999.000000       0.034900       0.238000
56168     56168     sichuan        102.0667       31.4833          114       128     2012      02        09        040              0.050875       2.519653       0.000000       0.213985   -9999.000000   -9999.000000   -9999.000000   -9999.000000
56168     56168     sichuan        102.0667       31.4833          114       128     2012      02        10        041              0.049625       2.563507       0.000000       0.228051   -9999.000000   -9999.000000   -9999.000000   -9999.000000
56168     56168     sichuan        102.0667       31.4833          114       128     2012      02        11        042              0.049167       0.655884       0.000000       0.194978   -9999.000000   -9999.000000       0.048800       0.146000
56168     56168     sichuan        102.0667       31.4833          114       128     2012      02        12        043              0.048542       0.936401       0.000000       0.190611   -9999.000000   -9999.000000       0.050100   -9999.000000
56168     56168     sichuan        102.0667       31.4833          114       128     2012      02        13        044              0.047833       0.416229       0.000000       0.183461   -9999.000000   -9999.000000       0.026100       0.117000
56168     56168     sichuan        102.0667       31.4833          114       128     2012      02        14        045              0.093333       0.743439       0.000000       0.187332   -9999.000000   -9999.000000   -9999.000000   -9999.000000
56168     56168     sichuan        102.0667       31.4833          114       128     2012      02        15        046              0.010208       1.467773       0.000000       0.199082   -9999.000000   -9999.000000   -9999.000000   -9999.000000
56168     56168     sichuan        102.0667       31.4833          114       128     2012      02        16        047              0.072458       1.858276       0.000000       0.208091       0.120000   -9999.000000       0.039000       0.388000
56168     56168     sichuan        102.0667       31.4833          114       128     2012      02        17        048              0.044542       3.082336       0.000000       0.221629       0.116000   -9999.000000       0.043700   -9999.000000
56168     56168     sichuan        102.0667       31.4833          114       128     2012      02        18        049              0.043500       3.408417       0.000000       0.226040   -9999.000000   -9999.000000       0.023100       0.059000
56168     56168     sichuan        102.0667       31.4833          114       128     2012      02        19        050              0.043083       1.193298       0.000000       0.196088   -9999.000000   -9999.000000       0.025300   -9999.000000
56168     56168     sichuan        102.0667       31.4833          114       128     2012      02        20        051              0.042792       1.065063       0.000000       0.190254   -9999.000000   -9999.000000   -9999.000000       0.213000
56168     56168     sichuan        102.0667       31.4833          114       128     2012      02        21        052              0.042304       1.467377       0.000000       0.195584       0.076000   -9999.000000   -9999.000000   -9999.000000
56168     56168     sichuan        102.0667       31.4833          114       128     2012      02        22        053              0.041217       2.950806       0.000000       0.215061       0.087000   -9999.000000       0.054000   -9999.000000
56168     56168     sichuan        102.0667       31.4833          114       128     2012      02        23        054              0.040304       3.423615       0.341037       0.222565       0.091000   -9999.000000       0.035800       0.209000
56168     56168     sichuan        102.0667       31.4833          114       128     2012      02        24        055              0.039375       4.125244       0.000000       0.227034   -9999.000000   -9999.000000       0.060500   -9999.000000
56168     56168     sichuan        102.0667       31.4833          114       128     2012      02        25        056              0.038167       5.272278       0.600541       0.230769   -9999.000000   -9999.000000       0.045600       0.362000
56168     56168     sichuan        102.0667       31.4833          114       128     2012      02        26        057              0.037375       4.839478       0.000000       0.228944       0.080000   -9999.000000   -9999.000000   -9999.000000
56168     56168     sichuan        102.0667       31.4833          114       128     2012      02        27        058              0.036381       3.774689       0.000000       0.229342   -9999.000000   -9999.000000   -9999.000000       0.047000
56168     56168     sichuan        102.0667       31.4833          114       128     2012      02        28        059              0.036348       1.978729       0.118555       0.209629       0.087000   -9999.000000   -9999.000000       0.223000
56168     56168     sichuan        102.0667       31.4833          114       128     2012      02        29        060              0.000000   -9999.000000       0.135570   -9999.000000   -9999.000000   -9999.000000   -9999.000000   -9999.000000
56168     56168     sichuan        102.0667       31.4833          114       128     2012      03        01        061              0.034182       4.278748       0.000000       0.225473   -9999.000000   -9999.000000       0.056700       0.239000
56168     56168     sichuan        102.0667       31.4833          114       128     2012      03        02        062              0.033458       3.530365       0.000000       0.229234   -9999.000000   -9999.000000   -9999.000000   -9999.000000
56168     56168     sichuan        102.0667       31.4833          114       128     2012      03        03        063              0.032750       3.675385       0.000000       0.222040   -9999.000000   -9999.000000   -9999.000000       0.111000
56168     56168     sichuan        102.0667       31.4833          114       128     2012      03        04        064              0.032042       2.925537       0.000000       0.216054   -9999.000000   -9999.000000       0.073500   -9999.000000
56168     56168     sichuan        102.0667       31.4833          114       128     2012      03        05        065              0.031833       2.216461       0.077846       0.207159   -9999.000000   -9999.000000       0.084300   -9999.000000
56168     56168     sichuan        102.0667       31.4833          114       128     2012      03        06        066              0.031208       3.654663       1.163509       0.216705   -9999.000000   -9999.000000       0.089700       0.554000
56168     56168     sichuan        102.0667       31.4833          114       128     2012      03        07        067              0.000000       5.365112       0.252071       0.230305       0.105000   -9999.000000       0.076600   -9999.000000
56168     56168     sichuan        102.0667       31.4833          114       128     2012      03        08        068              0.029458       6.461731       4.486741       0.237981       0.092000   -9999.000000   -9999.000000       0.275000
56168     56168     sichuan        102.0667       31.4833          114       128     2012      03        09        069              0.028542       6.521088       0.657829       0.237025       0.096000   -9999.000000   -9999.000000   -9999.000000
56168     56168     sichuan        102.0667       31.4833          114       128     2012      03        10        070              0.027708       5.914917       1.809766       0.230662   -9999.000000   -9999.000000       0.080500   -9999.000000
56168     56168     sichuan        102.0667       31.4833          114       128     2012      03        11        071              0.026875       6.486969       0.000000       0.231490   -9999.000000   -9999.000000       0.060800       0.469000
56168     56168     sichuan        102.0667       31.4833          114       128     2012      03        12        072              0.056792       6.419525       2.190801       0.232479       0.095000   -9999.000000       0.070300   -9999.000000
56168     56168     sichuan        102.0667       31.4833          114       128     2012      03        13        073              0.024375       6.686249       0.389492       0.231971       0.088000   -9999.000000       0.065900       0.383000
56168     56168     sichuan        102.0667       31.4833          114       128     2012      03        14        074              0.024958       7.871582       0.000000       0.233120       0.085000   -9999.000000   -9999.000000   -9999.000000
56168     56168     sichuan        102.0667       31.4833          114       128     2012      03        15        075              0.024667       7.662781       0.000000       0.234322       0.094000   -9999.000000       0.048700   -9999.000000
56168     56168     sichuan        102.0667       31.4833          114       128     2012      03        16        076              0.024000       7.061188       0.000000       0.232509   -9999.000000   -9999.000000       0.064600       0.426000
56168     56168     sichuan        102.0667       31.4833          114       128     2012      03        17        077              0.000000       5.874451       0.000000       0.227231   -9999.000000   -9999.000000       0.046700   -9999.000000
56168     56168     sichuan        102.0667       31.4833          114       128     2012      03        18        078              0.000000       6.425659       0.000000       0.220149       0.101000   -9999.000000       0.059700       0.299000
56168     56168     sichuan        102.0667       31.4833          114       128     2012      03        19        079              0.000000       7.000244       0.115236       0.223297       0.100000   -9999.000000   -9999.000000   -9999.000000
56168     56168     sichuan        102.0667       31.4833          114       128     2012      03        20        080              0.000000       6.927307       0.491942       0.224316       0.096000   -9999.000000   -9999.000000       0.552000
56168     56168     sichuan        102.0667       31.4833          114       128     2012      03        21        081              0.000000       8.354919       0.210052       0.227988   -9999.000000   -9999.000000       0.059300   -9999.000000
56168     56168     sichuan        102.0667       31.4833          114       128     2012      03        22        082              0.000000       9.528320       0.000000       0.230204   -9999.000000   -9999.000000       0.047800   -9999.000000
56168     56168     sichuan        102.0667       31.4833          114       128     2012      03        23        083              0.000000       9.147888       0.000000       0.227222       0.120000   -9999.000000       0.066700       0.152000
56168     56168     sichuan        102.0667       31.4833          114       128     2012      03        24        084              0.000000       4.803467       0.779401       0.224922       0.106000   -9999.000000       0.065100   -9999.000000
56168     56168     sichuan        102.0667       31.4833          114       128     2012      03        25        085              0.000000       5.723663       0.000000       0.226438       0.104000   -9999.000000   -9999.000000       0.353000
56168     56168     sichuan        102.0667       31.4833          114       128     2012      03        26        086              0.000000       5.458099       0.299902       0.230781   -9999.000000   -9999.000000   -9999.000000   -9999.000000
56168     56168     sichuan        102.0667       31.4833          114       128     2012      03        27        087              0.000000       7.763672       0.769217       0.235334   -9999.000000   -9999.000000       0.065700       0.341000
56168     56168     sichuan        102.0667       31.4833          114       128     2012      03        28        088              0.028750       8.378143       2.538378       0.239466       0.130000   -9999.000000       0.052500       0.548000
56168     56168     sichuan        102.0667       31.4833          114       128     2012      03        29        089              0.029833      10.531250       0.960884       0.238488   -9999.000000   -9999.000000       0.059500   -9999.000000
56168     56168     sichuan        102.0667       31.4833          114       128     2012      03        30        090              0.049292       5.499939       0.000000       0.240731   -9999.000000   -9999.000000       0.057400       0.574000
56168     56168     sichuan        102.0667       31.4833          114       128     2012      03        31        091              0.074500       4.717377       5.007561       0.231119   -9999.000000   -9999.000000   -9999.000000   -9999.000000
56168     56168     sichuan        102.0667       31.4833          114       128     2012      04        01        092              0.060167       4.740265       0.000000       0.221049   -9999.000000   -9999.000000       0.047300       0.462000
56168     56168     sichuan        102.0667       31.4833          114       128     2012      04        02        093              0.073625       6.281464       0.934142       0.225911       0.123000   -9999.000000       0.064200   -9999.000000
56168     56168     sichuan        102.0667       31.4833          114       128     2012      04        03        094              0.011208       9.317261       0.160043       0.232635       0.117000   -9999.000000       0.053500   -9999.000000
56168     56168     sichuan        102.0667       31.4833          114       128     2012      04        04        095              0.042042      11.393280       2.294020       0.231709   -9999.000000   -9999.000000       0.073800       0.528000
56168     56168     sichuan        102.0667       31.4833          114       128     2012      04        05        096              0.057208       9.805511       5.609978       0.237802       0.115000   -9999.000000   -9999.000000   -9999.000000
56168     56168     sichuan        102.0667       31.4833          114       128     2012      04        06        097              0.091958       5.332611       5.012924       0.262607   -9999.000000   -9999.000000   -9999.000000       0.527000
56168     56168     sichuan        102.0667       31.4833          114       128     2012      04        07        098              0.138083       5.648773       6.067875       0.270401   -9999.000000   -9999.000000       0.066600   -9999.000000
56168     56168     sichuan        102.0667       31.4833          114       128     2012      04        08        099              0.121333       4.219208       0.419989       0.286319       0.121000   -9999.000000       0.057000   -9999.000000
56168     56168     sichuan        102.0667       31.4833          114       128     2012      04        09        100              0.102333       5.270447       1.346095       0.280317       0.129000   -9999.000000       0.062500       0.632000
56168     56168     sichuan        102.0667       31.4833          114       128     2012      04        10        101              0.088000       7.451843       1.684259       0.274013       0.106000   -9999.000000       0.056100   -9999.000000
56168     56168     sichuan        102.0667       31.4833          114       128     2012      04        11        102              0.076917       9.263489       5.679421       0.273894   -9999.000000   -9999.000000   -9999.000000       0.560000
56168     56168     sichuan        102.0667       31.4833          114       128     2012      04        12        103              0.068083      11.125000       2.304077       0.282189   -9999.000000   -9999.000000   -9999.000000   -9999.000000
56168     56168     sichuan        102.0667       31.4833          114       128     2012      04        13        104              0.034583       7.770599       4.649602       0.281700       0.152000   -9999.000000       0.050100       0.390000
56168     56168     sichuan        102.0667       31.4833          114       128     2012      04        14        105              0.046917       8.195221       3.192855       0.287149       0.148000   -9999.000000       0.043800       0.411000
56168     56168     sichuan        102.0667       31.4833          114       128     2012      04        15        106              0.084250       9.147888       2.591318       0.287191       0.147000   -9999.000000       0.064500   -9999.000000
56168     56168     sichuan        102.0667       31.4833          114       128     2012      04        16        107              0.076083       8.741241       4.833130       0.286764   -9999.000000   -9999.000000       0.053700       0.383000
56168     56168     sichuan        102.0667       31.4833          114       128     2012      04        17        108              0.070042       8.410950       1.099814       0.286309   -9999.000000   -9999.000000   -9999.000000   -9999.000000
56168     56168     sichuan        102.0667       31.4833          114       128     2012      04        18        109              0.067750       5.860260       0.589988       0.280299   -9999.000000   -9999.000000   -9999.000000       0.547000
56168     56168     sichuan        102.0667       31.4833          114       128     2012      04        19        110              0.072542       6.857788       3.008811       0.275604       0.128000   -9999.000000       0.028700   -9999.000000
56168     56168     sichuan        102.0667       31.4833          114       128     2012      04        20        111              0.033667       5.914734       1.403668       0.269166       0.121000   -9999.000000       0.022000   -9999.000000
56168     56168     sichuan        102.0667       31.4833          114       128     2012      04        21        112              0.077917       7.156769       1.558802       0.264266   -9999.000000   -9999.000000       0.046000       0.446000
56168     56168     sichuan        102.0667       31.4833          114       128     2012      04        22        113              0.044708       7.832550       0.771989       0.266651   -9999.000000   -9999.000000   -9999.000000   -9999.000000
56168     56168     sichuan        102.0667       31.4833          114       128     2012      04        23        114              0.049708      11.303833       0.301953       0.265212   -9999.000000   -9999.000000   -9999.000000       0.392000
56168     56168     sichuan        102.0667       31.4833          114       128     2012      04        24        115              0.046958      10.908264       0.696680       0.263236       0.127000   -9999.000000       0.029800   -9999.000000
56168     56168     sichuan        102.0667       31.4833          114       128     2012      04        25        116              0.000000      10.329865       0.325417       0.262437       0.133000   -9999.000000       0.021300       0.387000
56168     56168     sichuan        102.0667       31.4833          114       128     2012      04        26        117              0.040958      10.542877       1.184780       0.255367       0.110000   -9999.000000       0.049500       0.427000
56168     56168     sichuan        102.0667       31.4833          114       128     2012      04        27        118              0.036750      10.160889       1.237116       0.256345   -9999.000000   -9999.000000       0.050200   -9999.000000
56168     56168     sichuan        102.0667       31.4833          114       128     2012      04        28        119              0.030375       9.961090       0.929688       0.257865   -9999.000000   -9999.000000   -9999.000000       0.509000
56168     56168     sichuan        102.0667       31.4833          114       128     2012      04        29        120              0.042208      10.848572       0.605469       0.255236       0.128000   -9999.000000   -9999.000000   -9999.000000
56168     56168     sichuan        102.0667       31.4833          114       128     2012      04        30        121              0.031083      10.154327       9.470408       0.256884       0.128000   -9999.000000       0.041000       0.498000
56168     56168     sichuan        102.0667       31.4833          114       128     2012      05        01        122              0.019375      10.943939       0.619653       0.271786       0.181000   -9999.000000       0.040300   -9999.000000
56168     56168     sichuan        102.0667       31.4833          114       128     2012      05        02        123              0.035250       9.704681       4.107514       0.281788   -9999.000000   -9999.000000       0.046700   -9999.000000
56168     56168     sichuan        102.0667       31.4833          114       128     2012      05        03        124              0.008250      12.068970       9.388443       0.279045   -9999.000000   -9999.000000   -9999.000000       0.698000
56168     56168     sichuan        102.0667       31.4833          114       128     2012      05        04        125              0.029083      11.292145       0.000000       0.293990       0.181000   -9999.000000   -9999.000000   -9999.000000
56168     56168     sichuan        102.0667       31.4833          114       128     2012      05        05        126              0.020458      12.593140       5.809187       0.282004       0.153000   -9999.000000       0.027900       0.631000
56168     56168     sichuan        102.0667       31.4833          114       128     2012      05        06        127              0.030000      14.006195       1.179847       0.271595       0.164000   -9999.000000       0.036500   -9999.000000
56168     56168     sichuan        102.0667       31.4833          114       128     2012      05        07        128              0.018792      14.449982       1.351419       0.267495   -9999.000000   -9999.000000       0.037500   -9999.000000
56168     56168     sichuan        102.0667       31.4833          114       128     2012      05        08        129              0.017167      14.933136       0.000000       0.259958   -9999.000000   -9999.000000       0.052100       0.750000
56168     56168     sichuan        102.0667       31.4833          114       128     2012      05        09        130              0.021750      14.650177       4.852476       0.256799       0.157000   -9999.000000   -9999.000000   -9999.000000
56168     56168     sichuan        102.0667       31.4833          114       128     2012      05        10        131              0.014500      14.823456       0.275818       0.249521       0.167000   -9999.000000   -9999.000000       0.756000
56168     56168     sichuan        102.0667       31.4833          114       128     2012      05        11        132              0.013500      16.503204       7.781888       0.243494   -9999.000000   -9999.000000       0.052900   -9999.000000
56168     56168     sichuan        102.0667       31.4833          114       128     2012      05        12        133              0.021750      14.805084       4.651648       0.264501       0.232000   -9999.000000       0.051100       0.752000
56168     56168     sichuan        102.0667       31.4833          114       128     2012      05        13        134              0.026167      13.455414       1.551404       0.278573   -9999.000000   -9999.000000       0.050800       0.733000
56168     56168     sichuan        102.0667       31.4833          114       128     2012      05        14        135              0.053208      12.158905       1.757572       0.274276       0.243000   -9999.000000       0.086100   -9999.000000
56168     56168     sichuan        102.0667       31.4833          114       128     2012      05        15        136              0.006583       9.143646       1.721022       0.274252       0.226000   -9999.000000   -9999.000000       0.634000
56168     56168     sichuan        102.0667       31.4833          114       128     2012      05        16        137              0.000000      10.046143       1.524352       0.272513       0.250500   -9999.000000   -9999.000000   -9999.000000
56168     56168     sichuan        102.0667       31.4833          114       128     2012      05        17        138              0.028833       8.616974       7.418204       0.276707       0.257000   -9999.000000       0.084000       0.749000
56168     56168     sichuan        102.0667       31.4833          114       128     2012      05        18        139              0.043750      13.109894       0.627561       0.282105   -9999.000000   -9999.000000       0.071300   -9999.000000
56168     56168     sichuan        102.0667       31.4833          114       128     2012      05        19        140              0.010167      12.265472       2.663769       0.280125   -9999.000000   -9999.000000       0.086300   -9999.000000
56168     56168     sichuan        102.0667       31.4833          114       128     2012      05        20        141              0.026125      14.997437       0.703475       0.268727       0.215000   -9999.000000   -9999.000000       0.648000
56168     56168     sichuan        102.0667       31.4833          114       128     2012      05        21        142              0.022208      16.889832       4.079606       0.261591       0.209000   -9999.000000   -9999.000000   -9999.000000
56168     56168     sichuan        102.0667       31.4833          114       128     2012      05        22        143              0.022542      17.844849       1.182018       0.267823       0.184000   -9999.000000       0.135800       0.687000
56168     56168     sichuan        102.0667       31.4833          114       128     2012      05        23        144              0.020708      15.299622       1.573566       0.266430   -9999.000000   -9999.000000       0.137700   -9999.000000
56168     56168     sichuan        102.0667       31.4833          114       128     2012      05        24        145              0.020667      15.587616       9.467251       0.265404   -9999.000000   -9999.000000       0.132200       0.545000
56168     56168     sichuan        102.0667       31.4833          114       128     2012      05        25        146              0.000000      12.240967       2.264336       0.280170       0.217000   -9999.000000       0.136800       0.727000
56168     56168     sichuan        102.0667       31.4833          114       128     2012      05        26        147              0.022458      12.262604       1.012934       0.289901       0.204500   -9999.000000   -9999.000000   -9999.000000
56168     56168     sichuan        102.0667       31.4833          114       128     2012      05        27        148              0.017458      14.727478       3.761260       0.274803       0.184000   -9999.000000   -9999.000000       0.797000
56168     56168     sichuan        102.0667       31.4833          114       128     2012      05        28        149              0.024542      16.103516      11.897494       0.279386   -9999.000000   -9999.000000   -9999.000000   -9999.000000
56168     56168     sichuan        102.0667       31.4833          114       128     2012      05        29        150              0.026042      16.665833       6.987126       0.296706   -9999.000000   -9999.000000       0.131800       0.952000
56168     56168     sichuan        102.0667       31.4833          114       128     2012      05        30        151              0.027917      15.574707       4.769166       0.290918       0.197000   -9999.000000       0.134800   -9999.000000
56168     56168     sichuan        102.0667       31.4833          114       128     2012      05        31        152              0.036250      13.801849       4.732666       0.299412       0.230000   -9999.000000       0.137600   -9999.000000
56168     56168     sichuan        102.0667       31.4833          114       128     2012      06        01        153              0.054458      12.335510       0.000000       0.300279       0.348000   -9999.000000   -9999.000000       0.916000
56168     56168     sichuan        102.0667       31.4833          114       128     2012      06        02        154              0.067167      14.618530      26.497763       0.285410   -9999.000000   -9999.000000   -9999.000000   -9999.000000
56168     56168     sichuan        102.0667       31.4833          114       128     2012      06        03        155              0.138500      11.843048      34.609058       0.312379   -9999.000000   -9999.000000   -9999.000000       0.791000
56168     56168     sichuan        102.0667       31.4833          114       128     2012      06        04        156              0.128458       9.949219       3.691459       0.342788       0.386000   -9999.000000       0.186800   -9999.000000
56168     56168     sichuan        102.0667       31.4833          114       128     2012      06        05        157              0.117458      11.774292       9.326260       0.318057   -9999.000000   -9999.000000       0.181100   -9999.000000
56168     56168     sichuan        102.0667       31.4833          114       128     2012      06        06        158              0.144375      14.509705       5.796011       0.313013       0.402000   -9999.000000   -9999.000000       1.000000
56168     56168     sichuan        102.0667       31.4833          114       128     2012      06        07        159              0.114167      14.178070      10.280262       0.311667       0.329000   -9999.000000   -9999.000000   -9999.000000
56168     56168     sichuan        102.0667       31.4833          114       128     2012      06        08        160              0.012375      14.621399      32.498711       0.311615   -9999.000000   -9999.000000       0.178600       1.000000
56168     56168     sichuan        102.0667       31.4833          114       128     2012      06        09        161              0.079583      13.808075      22.659624       0.343535   -9999.000000   -9999.000000       0.192500   -9999.000000
56168     56168     sichuan        102.0667       31.4833          114       128     2012      06        10        162              0.069375      13.462708       7.572131       0.334473       0.338000   -9999.000000       0.180200       1.000000
56168     56168     sichuan        102.0667       31.4833          114       128     2012      06        11        163              0.000000      12.727478       2.322966       0.319979       0.362000   -9999.000000       0.102900       0.873000
56168     56168     sichuan        102.0667       31.4833          114       128     2012      06        12        164              0.134625      11.948273       1.784546       0.310474       0.305000   -9999.000000   -9999.000000   -9999.000000
56168     56168     sichuan        102.0667       31.4833          114       128     2012      06        13        165              0.132625      13.296082       6.114271       0.302376   -9999.000000   -9999.000000   -9999.000000       0.899000
56168     56168     sichuan        102.0667       31.4833          114       128     2012      06        14        166              0.118167      13.356689       0.716678       0.307173       0.350000   -9999.000000       0.099700   -9999.000000
56168     56168     sichuan        102.0667       31.4833          114       128     2012      06        15        167              0.111167      14.258484       0.486901       0.295637       0.372000   -9999.000000       0.098800       1.000000
56168     56168     sichuan        102.0667       31.4833          114       128     2012      06        16        168              0.111833      11.899384       3.474170       0.292565       0.353500   -9999.000000       0.098700   -9999.000000
56168     56168     sichuan        102.0667       31.4833          114       128     2012      06        17        169              0.107583      11.401398       5.286738       0.296507       0.298000   -9999.000000       0.098200   -9999.000000
56168     56168     sichuan        102.0667       31.4833          114       128     2012      06        18        170              0.124083      13.863586       0.883601       0.301261   -9999.000000   -9999.000000   -9999.000000       0.785000
56168     56168     sichuan        102.0667       31.4833          114       128     2012      06        19        171              0.108542      14.410889       4.359858       0.297737       0.354000   -9999.000000       0.076900   -9999.000000
56168     56168     sichuan        102.0667       31.4833          114       128     2012      06        20        172              0.117083      15.248138       5.013680       0.294204       0.320000   -9999.000000       0.079500       0.832000
56168     56168     sichuan        102.0667       31.4833          114       128     2012      06        21        173              0.115708      12.587677       5.568183       0.305890       0.324000   -9999.000000       0.078600   -9999.000000
56168     56168     sichuan        102.0667       31.4833          114       128     2012      06        22        174              0.116500      13.432190       1.267524       0.300670       0.351500   -9999.000000       0.080000       0.665000
56168     56168     sichuan        102.0667       31.4833          114       128     2012      06        23        175              0.101375      13.765778       0.130570       0.299490       0.326000   -9999.000000   -9999.000000   -9999.000000
56168     56168     sichuan        102.0667       31.4833          114       128     2012      06        24        176              0.102250      14.463806       6.350045       0.290342   -9999.000000   -9999.000000   -9999.000000   -9999.000000
56168     56168     sichuan        102.0667       31.4833          114       128     2012      06        25        177              0.123917      12.947754       5.720728       0.299308       0.393000   -9999.000000       0.092300       1.000000
56168     56168     sichuan        102.0667       31.4833          114       128     2012      06        26        178              0.128500      14.931122       2.522180       0.305620       0.344000   -9999.000000       0.090700   -9999.000000
56168     56168     sichuan        102.0667       31.4833          114       128     2012      06        27        179              0.137000      14.891968       7.393485       0.300473       0.343000   -9999.000000       0.088000       0.883000
56168     56168     sichuan        102.0667       31.4833          114       128     2012      06        28        180              0.138833      16.325470       7.631040       0.304488   -9999.000000   -9999.000000       0.088200   -9999.000000
56168     56168     sichuan        102.0667       31.4833          114       128     2012      06        29        181              0.148417      15.902588      43.825199       0.306174   -9999.000000   -9999.000000   -9999.000000   -9999.000000
56168     56168     sichuan        102.0667       31.4833          114       128     2012      06        30        182              0.155083      15.630981      14.810596       0.335488       0.362000   -9999.000000   -9999.000000   -9999.000000
56168     56168     sichuan        102.0667       31.4833          114       128     2012      07        01        183              0.158292      15.404755       7.538242       0.331474       0.411500   -9999.000000       0.090400   -9999.000000
56168     56168     sichuan        102.0667       31.4833          114       128     2012      07        02        184              0.154083      15.950317      29.218637       0.319220       0.435000   -9999.000000       0.112200       0.883000
56168     56168     sichuan        102.0667       31.4833          114       128     2012      07        03        185              0.170708      14.565186      22.194822       0.330550   -9999.000000   -9999.000000       0.103700   -9999.000000
56168     56168     sichuan        102.0667       31.4833          114       128     2012      07        04        186              0.144583      14.607635       0.000000       0.340631   -9999.000000   -9999.000000       0.107300   -9999.000000
56168     56168     sichuan        102.0667       31.4833          114       128     2012      07        05        187              0.123833      14.997070       0.000000       0.322590   -9999.000000   -9999.000000   -9999.000000       0.916000
56168     56168     sichuan        102.0667       31.4833          114       128     2012      07        06        188              0.126875      16.721924      20.629135       0.311580   -9999.000000   -9999.000000       0.109100   -9999.000000
56168     56168     sichuan        102.0667       31.4833          114       128     2012      07        07        189              0.135667      15.373871       2.108358       0.329431   -9999.000000       0.114300       0.109800       0.834000
56168     56168     sichuan        102.0667       31.4833          114       128     2012      07        08        190              0.126167      16.525299       0.692998       0.316117       0.496000   -9999.000000       0.106900   -9999.000000
56168     56168     sichuan        102.0667       31.4833          114       128     2012      07        09        191              0.125500      16.219971       6.997156       0.309787       0.334000   -9999.000000       0.118000       1.000000
56168     56168     sichuan        102.0667       31.4833          114       128     2012      07        10        192              0.124875      16.306183       0.978434       0.314498   -9999.000000   -9999.000000   -9999.000000       0.882000
56168     56168     sichuan        102.0667       31.4833          114       128     2012      07        11        193              0.132750      16.967529      10.031353       0.307450       0.442000       0.152400   -9999.000000   -9999.000000
56168     56168     sichuan        102.0667       31.4833          114       128     2012      07        12        194              0.145917      14.896912       2.919255       0.317078       0.361000   -9999.000000       0.127100       0.906000
56168     56168     sichuan        102.0667       31.4833          114       128     2012      07        13        195              0.123000      14.091339       0.112785       0.311667       0.342000   -9999.000000       0.123400   -9999.000000
56168     56168     sichuan        102.0667       31.4833          114       128     2012      07        14        196              0.154375      16.888794      12.689528       0.300584       0.364000   -9999.000000       0.130400       1.000000
56168     56168     sichuan        102.0667       31.4833          114       128     2012      07        15        197              0.142958      12.889984       0.668733       0.320451   -9999.000000       0.019100       0.128800   -9999.000000
56168     56168     sichuan        102.0667       31.4833          114       128     2012      07        16        198              0.130708      14.435333       4.819622       0.305271       0.388000   -9999.000000   -9999.000000   -9999.000000
56168     56168     sichuan        102.0667       31.4833          114       128     2012      07        17        199              0.150000      15.604034      30.903769       0.306803       0.357000       0.064900   -9999.000000       1.000000
56168     56168     sichuan        102.0667       31.4833          114       128     2012      07        18        200              0.164125      15.432617      27.944294       0.330814       0.354000   -9999.000000       0.079500   -9999.000000
56168     56168     sichuan        102.0667       31.4833          114       128     2012      07        19        201              0.158458      15.617584      21.321524       0.334572       0.318000   -9999.000000       0.078000       1.000000
56168     56168     sichuan        102.0667       31.4833          114       128     2012      07        20        202              0.151083      15.272308       4.920436       0.337454   -9999.000000   -9999.000000       0.074800   -9999.000000
56168     56168     sichuan        102.0667       31.4833          114       128     2012      07        21        203              0.162522      15.926208       3.030076       0.328079   -9999.000000   -9999.000000   -9999.000000       0.893000
56168     56168     sichuan        102.0667       31.4833          114       128     2012      07        22        204              0.183083      15.652863       4.553225       0.321424       0.500000       0.069400   -9999.000000   -9999.000000
56168     56168     sichuan        102.0667       31.4833          114       128     2012      07        23        205              0.184792      15.354034      13.892707       0.317717   -9999.000000   -9999.000000       0.057600   -9999.000000
56168     56168     sichuan        102.0667       31.4833          114       128     2012      07        24        206              0.161375      12.787231       1.724226       0.326822   -9999.000000   -9999.000000       0.059300       0.960000
56168     56168     sichuan        102.0667       31.4833          114       128     2012      07        25        207              0.146250      14.891724       1.051236       0.314345   -9999.000000   -9999.000000       0.057000   -9999.000000
56168     56168     sichuan        102.0667       31.4833          114       128     2012      07        26        208              0.118917      16.221100       0.877382       0.309427   -9999.000000   -9999.000000       0.056000       0.743000
56168     56168     sichuan        102.0667       31.4833          114       128     2012      07        27        209              0.125833      17.206940       8.166345       0.305751   -9999.000000       0.120800   -9999.000000   -9999.000000
56168     56168     sichuan        102.0667       31.4833          114       128     2012      07        28        210              0.135125      14.821991       0.000000       0.316341   -9999.000000   -9999.000000   -9999.000000   -9999.000000
56168     56168     sichuan        102.0667       31.4833          114       128     2012      07        29        211              0.097458      16.591339       0.000000       0.303699   -9999.000000       0.031000       0.055800       0.917000
56168     56168     sichuan        102.0667       31.4833          114       128     2012      07        30        212              0.107000      17.549530      12.879946       0.296593   -9999.000000   -9999.000000       0.124900   -9999.000000
56168     56168     sichuan        102.0667       31.4833          114       128     2012      07        31        213              0.150000      17.756073      41.886478       0.310047   -9999.000000   -9999.000000       0.119700       1.000000
56168     56168     sichuan        102.0667       31.4833          114       128     2012      08        01        214              0.160083      14.485870       2.045958       0.335843   -9999.000000       0.197000       0.123400   -9999.000000
56168     56168     sichuan        102.0667       31.4833          114       128     2012      08        02        215              0.145875      14.845947       1.038041       0.317669       0.499000       0.134800   -9999.000000   -9999.000000
56168     56168     sichuan        102.0667       31.4833          114       128     2012      08        03        216              0.111042      15.694550       4.421128       0.310299       0.500000   -9999.000000   -9999.000000       0.917000
56168     56168     sichuan        102.0667       31.4833          114       128     2012      08        04        217              0.122250      16.349304       2.510963       0.306687   -9999.000000       0.102700       0.125300   -9999.000000
56168     56168     sichuan        102.0667       31.4833          114       128     2012      08        05        218              0.116042      16.204651       1.076414       0.307496   -9999.000000   -9999.000000       0.124400       0.759000
56168     56168     sichuan        102.0667       31.4833          114       128     2012      08        06        219              0.100875      15.991333       6.431921       0.303643   -9999.000000   -9999.000000       0.170300   -9999.000000
56168     56168     sichuan        102.0667       31.4833          114       128     2012      08        07        220              0.103958      17.378326       0.135918       0.296990   -9999.000000       0.024800   -9999.000000       0.875000
56168     56168     sichuan        102.0667       31.4833          114       128     2012      08        08        221              0.098458      17.993561       0.000000       0.291195       0.500000   -9999.000000   -9999.000000       0.787000
56168     56168     sichuan        102.0667       31.4833          114       128     2012      08        09        222              0.094083      18.412415       0.257502       0.286710       0.500000   -9999.000000       0.167500   -9999.000000
56168     56168     sichuan        102.0667       31.4833          114       128     2012      08        10        223              0.090667      18.465790       0.000000       0.284242       0.493000   -9999.000000       0.168600       0.667000
56168     56168     sichuan        102.0667       31.4833          114       128     2012      08        11        224              0.087083      18.449219       0.000000       0.281596   -9999.000000       0.093700       0.167900   -9999.000000
56168     56168     sichuan        102.0667       31.4833          114       128     2012      08        12        225              0.084333      18.639771       5.431611       0.278729       0.481000   -9999.000000       0.161600       0.750000
56168     56168     sichuan        102.0667       31.4833          114       128     2012      08        13        226              0.081375      19.048798       4.096031       0.285726       0.446000   -9999.000000   -9999.000000   -9999.000000
56168     56168     sichuan        102.0667       31.4833          114       128     2012      08        14        227              0.079000      18.392456       3.268252       0.297470       0.483000       0.104000   -9999.000000   -9999.000000
56168     56168     sichuan        102.0667       31.4833          114       128     2012      08        15        228              0.077042      17.722870       0.283167       0.295683       0.421000   -9999.000000       0.137600       0.581000
56168     56168     sichuan        102.0667       31.4833          114       128     2012      08        16        229              0.074125      18.111298       0.000000       0.288680   -9999.000000   -9999.000000       0.137300   -9999.000000
56168     56168     sichuan        102.0667       31.4833          114       128     2012      08        17        230              0.072292      18.965454       0.458036       0.282752       0.466000   -9999.000000       0.131700       0.658000
56168     56168     sichuan        102.0667       31.4833          114       128     2012      08        18        231              0.086917      19.224457       4.048717       0.279422   -9999.000000   -9999.000000       0.130200   -9999.000000
56168     56168     sichuan        102.0667       31.4833          114       128     2012      08        19        232              0.083042      17.964966      12.539762       0.285139       0.497000       0.126000   -9999.000000       0.959000
56168     56168     sichuan        102.0667       31.4833          114       128     2012      08        20        233              0.106708      14.648682       5.329701       0.307637       0.463000       0.031300       0.194500       0.789000
56168     56168     sichuan        102.0667       31.4833          114       128     2012      08        21        234              0.130083      16.316376      16.745701       0.301917   -9999.000000   -9999.000000       0.205700   -9999.000000
56168     56168     sichuan        102.0667       31.4833          114       128     2012      08        22        235              0.131708      12.004242       0.000000       0.324123   -9999.000000   -9999.000000       0.199300   -9999.000000
56168     56168     sichuan        102.0667       31.4833          114       128     2012      08        23        236              0.112792      11.688202       0.000000       0.302808   -9999.000000   -9999.000000       0.197600   -9999.000000
56168     56168     sichuan        102.0667       31.4833          114       128     2012      08        24        237              0.097042      14.258820       0.251498       0.292835   -9999.000000   -9999.000000   -9999.000000   -9999.000000
56168     56168     sichuan        102.0667       31.4833          114       128     2012      08        25        238              0.000000      14.224060       0.817998       0.288949   -9999.000000   -9999.000000   -9999.000000   -9999.000000
56168     56168     sichuan        102.0667       31.4833          114       128     2012      08        26        239              0.075917      14.075043       0.000000       0.287961       0.494000   -9999.000000       0.195100   -9999.000000
56168     56168     sichuan        102.0667       31.4833          114       128     2012      08        27        240              0.076417      15.321106       2.539034       0.282485   -9999.000000   -9999.000000       0.216400       1.000000
56168     56168     sichuan        102.0667       31.4833          114       128     2012      08        28        241              0.073792      15.432892       0.000000       0.285905   -9999.000000   -9999.000000       0.204400   -9999.000000
56168     56168     sichuan        102.0667       31.4833          114       128     2012      08        29        242              0.071542      14.710785       3.885211       0.284847       0.500000       0.047600       0.215100       0.871000
56168     56168     sichuan        102.0667       31.4833          114       128     2012      08        30        243              0.075833      13.867706      12.602330       0.293174       0.485000   -9999.000000   -9999.000000   -9999.000000
56168     56168     sichuan        102.0667       31.4833          114       128     2012      08        31        244              0.106500      15.417236      13.217661       0.304921   -9999.000000   -9999.000000   -9999.000000   -9999.000000
56168     56168     sichuan        102.0667       31.4833          114       128     2012      09        01        245              0.127750      15.683990       0.171837       0.314843       0.452000   -9999.000000       0.212500       0.884000
56168     56168     sichuan        102.0667       31.4833          114       128     2012      09        02        246              0.109167      13.943329       0.000000       0.305997   -9999.000000   -9999.000000       0.209800   -9999.000000
56168     56168     sichuan        102.0667       31.4833          114       128     2012      09        03        247              0.097917      13.580353       1.392251       0.293502       0.488000   -9999.000000       0.234900       0.644000
56168     56168     sichuan        102.0667       31.4833          114       128     2012      09        04        248              0.086833      13.164734       3.979590       0.289614       0.474500       0.127400       0.226500   -9999.000000
56168     56168     sichuan        102.0667       31.4833          114       128     2012      09        05        249              0.077000      13.576050       1.140697       0.284201       0.454500   -9999.000000   -9999.000000       0.647000
56168     56168     sichuan        102.0667       31.4833          114       128     2012      09        06        250              0.070917      13.677765       0.000000       0.283987       0.449000       0.052300       0.228700       0.760000
56168     56168     sichuan        102.0667       31.4833          114       128     2012      09        07        251              0.069167      14.965485       3.068803       0.280241   -9999.000000   -9999.000000       0.234500   -9999.000000
56168     56168     sichuan        102.0667       31.4833          114       128     2012      09        08        252              0.062458      15.138947       0.000000       0.285955       0.493000   -9999.000000       0.229500       0.605000
56168     56168     sichuan        102.0667       31.4833          114       128     2012      09        09        253              0.087042      15.184784       5.455749       0.282079       0.459000       0.077000       0.201400   -9999.000000
56168     56168     sichuan        102.0667       31.4833          114       128     2012      09        10        254              0.054958      14.973602       2.184091       0.291328       0.483000   -9999.000000   -9999.000000       0.731000
56168     56168     sichuan        102.0667       31.4833          114       128     2012      09        11        255              0.102250      14.471985      23.183050       0.292013       0.300000       0.044400   -9999.000000   -9999.000000
56168     56168     sichuan        102.0667       31.4833          114       128     2012      09        12        256              0.140042      14.799591       0.450846       0.309924       0.421000   -9999.000000       0.090000   -9999.000000
56168     56168     sichuan        102.0667       31.4833          114       128     2012      09        13        257              0.123708      11.496674       1.455858       0.313796   -9999.000000   -9999.000000       0.089900       0.436000
56168     56168     sichuan        102.0667       31.4833          114       128     2012      09        14        258              0.085292      11.989471       4.023712       0.295711       0.379000   -9999.000000       0.090300   -9999.000000
56168     56168     sichuan        102.0667       31.4833          114       128     2012      09        15        259              0.114125      11.103424      31.020876       0.289046       0.285000   -9999.000000       0.094600       0.761000
56168     56168     sichuan        102.0667       31.4833          114       128     2012      09        16        260              0.154042      10.282684       8.812152       0.309397       0.421000   -9999.000000   -9999.000000   -9999.000000
56168     56168     sichuan        102.0667       31.4833          114       128     2012      09        17        261              0.134208       9.201324       5.610983       0.326615       0.334000   -9999.000000   -9999.000000       0.530000
56168     56168     sichuan        102.0667       31.4833          114       128     2012      09        18        262              0.123958      10.860413       2.104994       0.317392   -9999.000000   -9999.000000       0.180900       0.619000
56168     56168     sichuan        102.0667       31.4833          114       128     2012      09        19        263              0.118583       9.926483       6.953028       0.304557       0.341000   -9999.000000       0.182400   -9999.000000
56168     56168     sichuan        102.0667       31.4833          114       128     2012      09        20        264              0.136750      12.142517       6.340149       0.307501       0.373000   -9999.000000       0.165100       1.000000
56168     56168     sichuan        102.0667       31.4833          114       128     2012      09        21        265              0.147000      12.448853       3.276095       0.312888   -9999.000000   -9999.000000   -9999.000000   -9999.000000
56168     56168     sichuan        102.0667       31.4833          114       128     2012      09        22        266              0.146708      12.012909       2.305581       0.305735       0.234000   -9999.000000   -9999.000000       0.941000
56168     56168     sichuan        102.0667       31.4833          114       128     2012      09        23        267              0.131375      13.519989       0.000000       0.302390   -9999.000000   -9999.000000       0.181400   -9999.000000
56168     56168     sichuan        102.0667       31.4833          114       128     2012      09        24        268              0.116750      13.625519       9.463782       0.296518       0.314000       0.085200       0.096300   -9999.000000
56168     56168     sichuan        102.0667       31.4833          114       128     2012      09        25        269              0.154083      13.722443      20.985952       0.304865       0.304000   -9999.000000       0.095100       1.000000
56168     56168     sichuan        102.0667       31.4833          114       128     2012      09        26        270              0.156708      12.166504       1.123986       0.327453       0.287500   -9999.000000       0.094000   -9999.000000
56168     56168     sichuan        102.0667       31.4833          114       128     2012      09        27        271              0.146714      12.651398       4.273193       0.310938       0.293000   -9999.000000   -9999.000000       0.710000
56168     56168     sichuan        102.0667       31.4833          114       128     2012      09        28        272              0.157467      11.456512       3.462301       0.307987       0.282000   -9999.000000   -9999.000000   -9999.000000
56168     56168     sichuan        102.0667       31.4833          114       128     2012      09        29        273              0.164667      11.689362       2.398306       0.305644   -9999.000000   -9999.000000       0.093300   -9999.000000
56168     56168     sichuan        102.0667       31.4833          114       128     2012      09        30        274              0.152833      11.117249       0.932715       0.305715       0.311000   -9999.000000       0.092100       0.655000
56168     56168     sichuan        102.0667       31.4833          114       128     2012      10        01        275              0.146208      11.396942       3.154439       0.298295       0.322500   -9999.000000       0.067900   -9999.000000
56168     56168     sichuan        102.0667       31.4833          114       128     2012      10        02        276              0.163583      11.462433       7.506792       0.299606       0.378000   -9999.000000       0.070600       0.764000
56168     56168     sichuan        102.0667       31.4833          114       128     2012      10        03        277              0.181250      11.470673      13.710024       0.305762       0.321000   -9999.000000   -9999.000000   -9999.000000
56168     56168     sichuan        102.0667       31.4833          114       128     2012      10        04        278              0.191958      10.670502      15.910114       0.319961   -9999.000000   -9999.000000   -9999.000000       0.673000
56168     56168     sichuan        102.0667       31.4833          114       128     2012      10        05        279              0.183250       8.919403       6.743036       0.321358   -9999.000000   -9999.000000       0.069500       0.539000
56168     56168     sichuan        102.0667       31.4833          114       128     2012      10        06        280              0.165958       7.541931       2.430547       0.321812       0.347000   -9999.000000       0.074200   -9999.000000
56168     56168     sichuan        102.0667       31.4833          114       128     2012      10        07        281              0.163208       9.535431       5.551671       0.313860       0.301000   -9999.000000       0.072200       0.799000
56168     56168     sichuan        102.0667       31.4833          114       128     2012      10        08        282              0.178125      10.543823       4.726297       0.312945   -9999.000000   -9999.000000   -9999.000000   -9999.000000
56168     56168     sichuan        102.0667       31.4833          114       128     2012      10        09        283              0.187375      10.715088       8.469883       0.312283       0.360000   -9999.000000   -9999.000000       0.858000
56168     56168     sichuan        102.0667       31.4833          114       128     2012      10        10        284              0.199833       9.041107      14.588027       0.315666   -9999.000000   -9999.000000       0.083300   -9999.000000
56168     56168     sichuan        102.0667       31.4833          114       128     2012      10        11        285              0.196875       7.852570      17.007751       0.323145   -9999.000000   -9999.000000       0.086800   -9999.000000
56168     56168     sichuan        102.0667       31.4833          114       128     2012      10        12        286              0.204875       8.615997      10.562057       0.329781   -9999.000000   -9999.000000       0.083100       0.671000
56168     56168     sichuan        102.0667       31.4833          114       128     2012      10        13        287              0.189458       7.450104      12.434235       0.326257       0.341000   -9999.000000       0.086000   -9999.000000
56168     56168     sichuan        102.0667       31.4833          114       128     2012      10        14        288              0.176042       7.726013       4.702110       0.324243       0.267000   -9999.000000   -9999.000000       0.758000
56168     56168     sichuan        102.0667       31.4833          114       128     2012      10        15        289              0.165417       7.725739       3.757194       0.322812   -9999.000000   -9999.000000   -9999.000000   -9999.000000
56168     56168     sichuan        102.0667       31.4833          114       128     2012      10        16        290              0.157625       8.364899       5.725625       0.320393   -9999.000000   -9999.000000       0.085300       0.451000
56168     56168     sichuan        102.0667       31.4833          114       128     2012      10        17        291              0.150750       8.004181       1.778069       0.315876       0.271000   -9999.000000       0.075000       0.590000
56168     56168     sichuan        102.0667       31.4833          114       128     2012      10        18        292              0.145375       7.174042       1.312297       0.314068       0.260000   -9999.000000       0.092200   -9999.000000
56168     56168     sichuan        102.0667       31.4833          114       128     2012      10        19        293              0.140333       8.077148       1.532954       0.308846       0.257000   -9999.000000       0.086500       0.716000
56168     56168     sichuan        102.0667       31.4833          114       128     2012      10        20        294              0.136792       8.113251       1.329435       0.306553   -9999.000000   -9999.000000   -9999.000000   -9999.000000
56168     56168     sichuan        102.0667       31.4833          114       128     2012      10        21        295              0.133083       7.909637       0.539182       0.304076   -9999.000000   -9999.000000       0.079800       0.556000
56168     56168     sichuan        102.0667       31.4833          114       128     2012      10        22        296              0.127917       8.690918       0.126539       0.300452   -9999.000000   -9999.000000       0.058100   -9999.000000
56168     56168     sichuan        102.0667       31.4833          114       128     2012      10        23        297              0.122208       8.728027       2.010040       0.297652   -9999.000000   -9999.000000       0.052000   -9999.000000
56168     56168     sichuan        102.0667       31.4833          114       128     2012      10        24        298              0.121125       7.945892       0.957515       0.299456   -9999.000000   -9999.000000       0.055400       0.500000
56168     56168     sichuan        102.0667       31.4833          114       128     2012      10        25        299              0.000000       7.267609       0.895688       0.298364       0.247000   -9999.000000   -9999.000000   -9999.000000
56168     56168     sichuan        102.0667       31.4833          114       128     2012      10        26        300              0.115833       7.051422       0.444722       0.296924   -9999.000000   -9999.000000   -9999.000000       0.503000
56168     56168     sichuan        102.0667       31.4833          114       128     2012      10        27        301              0.116125       7.321045       0.732002       0.293496   -9999.000000   -9999.000000       0.055900   -9999.000000
56168     56168     sichuan        102.0667       31.4833          114       128     2012      10        28        302              0.000000       7.184296       1.506059       0.290608       0.253000   -9999.000000       0.051400   -9999.000000
56168     56168     sichuan        102.0667       31.4833          114       128     2012      10        29        303              0.116625       6.862823       0.674518       0.289144       0.256000   -9999.000000       0.097600       0.469000
56168     56168     sichuan        102.0667       31.4833          114       128     2012      10        30        304              0.118000       6.208099       1.954653       0.289876   -9999.000000   -9999.000000       0.090900   -9999.000000
56168     56168     sichuan        102.0667       31.4833          114       128     2012      10        31        305              0.117792       4.781006       2.560830       0.284066   -9999.000000   -9999.000000   -9999.000000       0.370000
56168     56168     sichuan        102.0667       31.4833          114       128     2012      11        01        306              0.117167       4.189362       2.638663       0.279139   -9999.000000   -9999.000000   -9999.000000   -9999.000000
56168     56168     sichuan        102.0667       31.4833          114       128     2012      11        02        307              0.117042       3.366119       2.425416       0.266435       0.271000   -9999.000000       0.097400       0.429000
56168     56168     sichuan        102.0667       31.4833          114       128     2012      11        03        308              0.116708       3.070526       1.687576       0.255978       0.275000   -9999.000000       0.086700       0.382000
56168     56168     sichuan        102.0667       31.4833          114       128     2012      11        04        309              0.115958       2.878723       1.229801       0.245432       0.259000   -9999.000000       0.093000   -9999.000000
56168     56168     sichuan        102.0667       31.4833          114       128     2012      11        05        310              0.115500       2.517487       1.241442       0.242766       0.260000   -9999.000000       0.082800       0.412000
56168     56168     sichuan        102.0667       31.4833          114       128     2012      11        06        311              0.115375       3.304138       0.569625       0.253989   -9999.000000   -9999.000000   -9999.000000   -9999.000000
56168     56168     sichuan        102.0667       31.4833          114       128     2012      11        07        312              0.115375       4.113922       1.374385       0.268003   -9999.000000   -9999.000000       0.078600       0.362000
56168     56168     sichuan        102.0667       31.4833          114       128     2012      11        08        313              0.115792       4.971161       2.459680       0.279699   -9999.000000   -9999.000000       0.087400   -9999.000000
56168     56168     sichuan        102.0667       31.4833          114       128     2012      11        09        314              0.114917       4.166992       1.951725       0.282651       0.264000   -9999.000000       0.079300   -9999.000000
56168     56168     sichuan        102.0667       31.4833          114       128     2012      11        10        315              0.114333       3.279510       0.741306       0.261175       0.252000   -9999.000000       0.082300       0.208000
56168     56168     sichuan        102.0667       31.4833          114       128     2012      11        11        316              0.113458       2.932556       1.511131       0.246413   -9999.000000   -9999.000000   -9999.000000   -9999.000000
56168     56168     sichuan        102.0667       31.4833          114       128     2012      11        12        317              0.112958       2.695709       0.172405       0.245510   -9999.000000   -9999.000000   -9999.000000       0.313000
56168     56168     sichuan        102.0667       31.4833          114       128     2012      11        13        318              0.000000       2.659760       1.080779       0.242102       0.253000   -9999.000000       0.109400   -9999.000000
56168     56168     sichuan        102.0667       31.4833          114       128     2012      11        14        319              0.112542       2.222137       0.493618       0.232639       0.231000   -9999.000000       0.097700       0.111000
56168     56168     sichuan        102.0667       31.4833          114       128     2012      11        15        320              0.112292       1.799286       0.597402       0.225043       0.230000   -9999.000000       0.109700   -9999.000000
56168     56168     sichuan        102.0667       31.4833          114       128     2012      11        16        321              0.110833       2.140503       0.482292       0.234966   -9999.000000   -9999.000000       0.097700   -9999.000000
56168     56168     sichuan        102.0667       31.4833          114       128     2012      11        17        322              0.000000       1.832977       0.846134       0.223778   -9999.000000   -9999.000000   -9999.000000       0.205000
56168     56168     sichuan        102.0667       31.4833          114       128     2012      11        18        323              0.106458       0.790405       1.901327       0.205792       0.266000   -9999.000000   -9999.000000   -9999.000000
56168     56168     sichuan        102.0667       31.4833          114       128     2012      11        19        324              0.106583       1.050812       1.553905       0.205258       0.256000   -9999.000000       0.101400       0.301000
56168     56168     sichuan        102.0667       31.4833          114       128     2012      11        20        325              0.106875       1.714417       5.423845       0.221690       0.261000   -9999.000000       0.090700   -9999.000000
56168     56168     sichuan        102.0667       31.4833          114       128     2012      11        21        326              0.107000       2.169617       2.067745       0.234319       0.218000   -9999.000000       0.092900   -9999.000000
56168     56168     sichuan        102.0667       31.4833          114       128     2012      11        22        327              0.106250       2.051819       0.000000       0.238686   -9999.000000   -9999.000000   -9999.000000       0.411000
56168     56168     sichuan        102.0667       31.4833          114       128     2012      11        23        328              0.105667       1.956329       0.000000       0.235939   -9999.000000   -9999.000000   -9999.000000   -9999.000000
56168     56168     sichuan        102.0667       31.4833          114       128     2012      11        24        329              0.105333       2.009521       3.875542       0.232646       0.214000   -9999.000000       0.099400       0.427000
56168     56168     sichuan        102.0667       31.4833          114       128     2012      11        25        330              0.104542       2.299896       4.051180       0.242991   -9999.000000   -9999.000000       0.100200   -9999.000000
56168     56168     sichuan        102.0667       31.4833          114       128     2012      11        26        331              0.103750       1.533630       2.291769       0.241939   -9999.000000   -9999.000000       0.081500   -9999.000000
56168     56168     sichuan        102.0667       31.4833          114       128     2012      11        27        332              0.102583       0.985992       2.601684       0.215589   -9999.000000   -9999.000000       0.077900       0.109000
56168     56168     sichuan        102.0667       31.4833          114       128     2012      11        28        333              0.104083       0.767548       5.214798       0.206142   -9999.000000   -9999.000000   -9999.000000   -9999.000000
56168     56168     sichuan        102.0667       31.4833          114       128     2012      11        29        334              0.103875       0.767731       3.908873       0.208193       0.241000   -9999.000000   -9999.000000       0.132000
56168     56168     sichuan        102.0667       31.4833          114       128     2012      11        30        335              0.103875       0.733490       9.022505       0.212275       0.243000   -9999.000000       0.085900   -9999.000000
56168     56168     sichuan        102.0667       31.4833          114       128     2012      12        01        336              0.103042       1.408752       1.247619       0.233924   -9999.000000   -9999.000000       0.073700       0.003000
56168     56168     sichuan        102.0667       31.4833          114       128     2012      12        02        337              0.099208       0.937500       3.468995       0.213290   -9999.000000   -9999.000000       0.083400       0.123000
56168     56168     sichuan        102.0667       31.4833          114       128     2012      12        03        338              0.095708      -0.308533       2.171812       0.177766   -9999.000000   -9999.000000       0.084300   -9999.000000
56168     56168     sichuan        102.0667       31.4833          114       128     2012      12        04        339              0.095042      -0.315247       2.443363       0.167737   -9999.000000   -9999.000000   -9999.000000       0.076000
56168     56168     sichuan        102.0667       31.4833          114       128     2012      12        05        340              0.094000      -0.858459       3.092669       0.155398       0.228000   -9999.000000       0.084200   -9999.000000
56168     56168     sichuan        102.0667       31.4833          114       128     2012      12        06        341              0.092708      -0.147461       7.742565       0.170482       0.219000   -9999.000000       0.096600       0.136000
56168     56168     sichuan        102.0667       31.4833          114       128     2012      12        07        342              0.087708      -0.419769       2.565629       0.178106       0.207000   -9999.000000       0.083600   -9999.000000
56168     56168     sichuan        102.0667       31.4833          114       128     2012      12        08        343              0.089000      -0.935089       3.253891       0.157912   -9999.000000   -9999.000000       0.086500   -9999.000000
56168     56168     sichuan        102.0667       31.4833          114       128     2012      12        09        344              0.097542      -1.131073       4.120165       0.151661   -9999.000000   -9999.000000   -9999.000000       0.006000
56168     56168     sichuan        102.0667       31.4833          114       128     2012      12        10        345              0.106208      -1.153778       2.679980       0.158010       0.239000   -9999.000000   -9999.000000   -9999.000000
56168     56168     sichuan        102.0667       31.4833          114       128     2012      12        11        346              0.106333      -1.155334       0.289955       0.152488       0.196000   -9999.000000       0.069100       0.057000
56168     56168     sichuan        102.0667       31.4833          114       128     2012      12        12        347              0.104458      -1.097107       2.800985       0.159869       0.182000   -9999.000000       0.072500   -9999.000000
56168     56168     sichuan        102.0667       31.4833          114       128     2012      12        13        348              0.103417      -1.221497       1.728369       0.156002   -9999.000000   -9999.000000       0.067500       0.001000
56168     56168     sichuan        102.0667       31.4833          114       128     2012      12        14        349              0.100500      -0.889954       2.411980       0.165166   -9999.000000   -9999.000000       0.062100   -9999.000000
56168     56168     sichuan        102.0667       31.4833          114       128     2012      12        15        350              0.000000      -1.671265       1.941191       0.152106   -9999.000000   -9999.000000   -9999.000000   -9999.000000
56168     56168     sichuan        102.0667       31.4833          114       128     2012      12        16        351              0.093875      -2.122253       1.761299       0.147273       0.195000   -9999.000000   -9999.000000       0.298000
56168     56168     sichuan        102.0667       31.4833          114       128     2012      12        17        352              0.097042      -1.322845       4.480684       0.154399   -9999.000000   -9999.000000       0.088300   -9999.000000
56168     56168     sichuan        102.0667       31.4833          114       128     2012      12        18        353              0.097375      -1.501678       2.819538       0.153558       0.193000   -9999.000000       0.077700       0.104000
56168     56168     sichuan        102.0667       31.4833          114       128     2012      12        19        354              0.093417      -1.077179       0.000000       0.163591   -9999.000000   -9999.000000       0.079900   -9999.000000
56168     56168     sichuan        102.0667       31.4833          114       128     2012      12        20        355              0.000000      -0.748047       1.791480       0.166340   -9999.000000   -9999.000000       0.077900   -9999.000000
56168     56168     sichuan        102.0667       31.4833          114       128     2012      12        21        356              0.094292      -0.663147       1.497345       0.170144   -9999.000000   -9999.000000   -9999.000000       0.157000
56168     56168     sichuan        102.0667       31.4833          114       128     2012      12        22        357              0.092750      -0.153229       1.816908       0.178685       0.216000   -9999.000000       0.074400   -9999.000000
56168     56168     sichuan        102.0667       31.4833          114       128     2012      12        23        358              0.083083      -1.363373       2.617218       0.164989       0.215000   -9999.000000       0.089000       0.047000
56168     56168     sichuan        102.0667       31.4833          114       128     2012      12        24        359              0.063300      -2.629089       1.040061       0.143249   -9999.000000   -9999.000000       0.093300   -9999.000000
56168     56168     sichuan        102.0667       31.4833          114       128     2012      12        25        360              0.062917      -3.340210       0.000000       0.130855   -9999.000000   -9999.000000       0.096000   -9999.000000
56168     56168     sichuan        102.0667       31.4833          114       128     2012      12        26        361              0.000000      -2.259705       1.044220       0.139831   -9999.000000   -9999.000000   -9999.000000       0.061000
56168     56168     sichuan        102.0667       31.4833          114       128     2012      12        27        362              0.068333      -2.683624       0.000000       0.131382       0.221000   -9999.000000   -9999.000000   -9999.000000
56168     56168     sichuan        102.0667       31.4833          114       128     2012      12        28        363              0.054000      -2.298889       0.122951       0.139462       0.212000   -9999.000000       0.105500       0.164000
56168     56168     sichuan        102.0667       31.4833          114       128     2012      12        29        364              0.000000      -1.372620       0.000000       0.145450   -9999.000000   -9999.000000       0.090300   -9999.000000
56168     56168     sichuan        102.0667       31.4833          114       128     2012      12        30        365              0.000000      -3.300690       0.000000       0.119131   -9999.000000   -9999.000000       0.101500   -9999.000000
56168     56168     sichuan        102.0667       31.4833          114       128     2012      12        31        366              0.087333      -3.344086       1.727111       0.124941   -9999.000000   -9999.000000       0.090400       0.021000
