# Supplementary material for: Research on Fusing Multisatellite Soil Moisture Data Based on Bayesian Model Averaging
Source: Hindawi journal article supplement (doi:10.1155/2018/9310838), 2018-06-25
Supplement: f1 [file 9310838.f1.zip › 2012_sm00-10cm_daily_ZDB_ZHY_56172_366days_allin.txt]

56172     56172     sichuan        102.2333       31.9000          112       129     2012      01        01        001              0.000000   -9999.000000       0.000000   -9999.000000   -9999.000000   -9999.000000   -9999.000000   -9999.000000
56172     56172     sichuan        102.2333       31.9000          112       129     2012      01        02        002              0.115625      -1.264893       0.000000       0.152625   -9999.000000   -9999.000000       0.030200   -9999.000000
56172     56172     sichuan        102.2333       31.9000          112       129     2012      01        03        003              0.000000       0.169403       0.000000       0.175807   -9999.000000   -9999.000000       0.017900   -9999.000000
56172     56172     sichuan        102.2333       31.9000          112       129     2012      01        04        004              0.133417      -1.292206       0.000000       0.141284   -9999.000000   -9999.000000       0.026400   -9999.000000
56172     56172     sichuan        102.2333       31.9000          112       129     2012      01        05        005              0.144917      -1.471313       0.000000       0.141425   -9999.000000   -9999.000000       0.019600       0.049000
56172     56172     sichuan        102.2333       31.9000          112       129     2012      01        06        006              0.153292      -2.668365       0.000000       0.132581   -9999.000000   -9999.000000   -9999.000000   -9999.000000
56172     56172     sichuan        102.2333       31.9000          112       129     2012      01        07        007              0.150125      -3.142700       0.000000       0.126775   -9999.000000   -9999.000000   -9999.000000   -9999.000000
56172     56172     sichuan        102.2333       31.9000          112       129     2012      01        08        008              0.000000      -2.492462       0.000000       0.132680   -9999.000000   -9999.000000       0.028600       0.015000
56172     56172     sichuan        102.2333       31.9000          112       129     2012      01        09        009              0.139208      -2.438965       0.000000       0.133985   -9999.000000   -9999.000000       0.033200   -9999.000000
56172     56172     sichuan        102.2333       31.9000          112       129     2012      01        10        010              0.155958      -1.448547       0.000000       0.143011   -9999.000000   -9999.000000   -9999.000000       0.065000
56172     56172     sichuan        102.2333       31.9000          112       129     2012      01        11        011              0.154667      -0.834717       0.000000       0.154118   -9999.000000   -9999.000000       0.024000   -9999.000000
56172     56172     sichuan        102.2333       31.9000          112       129     2012      01        12        012              0.147833      -0.549500       0.000000       0.161050   -9999.000000   -9999.000000   -9999.000000   -9999.000000
56172     56172     sichuan        102.2333       31.9000          112       129     2012      01        13        013              0.137083      -1.492096       0.000000       0.144219   -9999.000000   -9999.000000       0.022900       0.057000
56172     56172     sichuan        102.2333       31.9000          112       129     2012      01        14        014              0.134375      -1.050201       0.000000       0.148863   -9999.000000   -9999.000000       0.032000   -9999.000000
56172     56172     sichuan        102.2333       31.9000          112       129     2012      01        15        015              0.101292      -3.588196       0.000000       0.125275   -9999.000000   -9999.000000       0.022900       0.002000
56172     56172     sichuan        102.2333       31.9000          112       129     2012      01        16        016              0.097792      -4.081879       0.000000       0.111046   -9999.000000   -9999.000000       0.020200   -9999.000000
56172     56172     sichuan        102.2333       31.9000          112       129     2012      01        17        017              0.000000      -2.303864       0.000000       0.129520   -9999.000000   -9999.000000   -9999.000000   -9999.000000
56172     56172     sichuan        102.2333       31.9000          112       129     2012      01        18        018              0.114167      -0.988617       0.000000       0.152359   -9999.000000   -9999.000000   -9999.000000       0.027000
56172     56172     sichuan        102.2333       31.9000          112       129     2012      01        19        019              0.118000      -0.896271       1.001647       0.155369   -9999.000000   -9999.000000       0.025400   -9999.000000
56172     56172     sichuan        102.2333       31.9000          112       129     2012      01        20        020              0.120708      -0.507507       0.000000       0.161098   -9999.000000   -9999.000000       0.017600       0.111000
56172     56172     sichuan        102.2333       31.9000          112       129     2012      01        21        021              0.122583      -0.791229       0.000000       0.157168   -9999.000000   -9999.000000       0.025600   -9999.000000
56172     56172     sichuan        102.2333       31.9000          112       129     2012      01        22        022              0.127917      -0.848267       0.000000       0.151051   -9999.000000   -9999.000000       0.016800       0.020000
56172     56172     sichuan        102.2333       31.9000          112       129     2012      01        23        023              0.121125      -1.833191       0.000000       0.144061   -9999.000000   -9999.000000   -9999.000000       0.129000
56172     56172     sichuan        102.2333       31.9000          112       129     2012      01        24        024              0.121042      -1.134430       0.000000       0.149180   -9999.000000   -9999.000000   -9999.000000   -9999.000000
56172     56172     sichuan        102.2333       31.9000          112       129     2012      01        25        025              0.115542      -1.486969       0.000000       0.149765   -9999.000000   -9999.000000       0.028300       0.111000
56172     56172     sichuan        102.2333       31.9000          112       129     2012      01        26        026              0.116250      -1.325226       0.000000       0.151825   -9999.000000   -9999.000000       0.015800   -9999.000000
56172     56172     sichuan        102.2333       31.9000          112       129     2012      01        27        027              0.122708      -0.593048       0.000000       0.159935   -9999.000000   -9999.000000       0.023000       0.183000
56172     56172     sichuan        102.2333       31.9000          112       129     2012      01        28        028              0.136583       0.192230       0.000000       0.171345   -9999.000000   -9999.000000       0.023200   -9999.000000
56172     56172     sichuan        102.2333       31.9000          112       129     2012      01        29        029              0.139958       1.091400       0.000000       0.182603   -9999.000000   -9999.000000   -9999.000000       0.243000
56172     56172     sichuan        102.2333       31.9000          112       129     2012      01        30        030              0.143750       1.034515       0.000000       0.182764   -9999.000000   -9999.000000       0.036100       0.021000
56172     56172     sichuan        102.2333       31.9000          112       129     2012      01        31        031              0.135417       0.319397       0.000000       0.175074   -9999.000000   -9999.000000       0.038000   -9999.000000
56172     56172     sichuan        102.2333       31.9000          112       129     2012      02        01        032              0.132583      -0.236298       0.000000       0.164055       0.107000   -9999.000000       0.024800       0.247000
56172     56172     sichuan        102.2333       31.9000          112       129     2012      02        02        033              0.133583       0.451721       0.000000       0.173263   -9999.000000   -9999.000000       0.028800   -9999.000000
56172     56172     sichuan        102.2333       31.9000          112       129     2012      02        03        034              0.134708       0.202789       0.000000       0.173064   -9999.000000   -9999.000000   -9999.000000       0.175000
56172     56172     sichuan        102.2333       31.9000          112       129     2012      02        04        035              0.133542       0.463593       0.000000       0.174096   -9999.000000   -9999.000000   -9999.000000   -9999.000000
56172     56172     sichuan        102.2333       31.9000          112       129     2012      02        05        036              0.131292       1.470703       0.000000       0.182830   -9999.000000   -9999.000000       0.038800   -9999.000000
56172     56172     sichuan        102.2333       31.9000          112       129     2012      02        06        037              0.131625       1.560577       0.000000       0.192565   -9999.000000   -9999.000000       0.025800       0.228000
56172     56172     sichuan        102.2333       31.9000          112       129     2012      02        07        038              0.129417       1.846252       0.000000       0.195772   -9999.000000   -9999.000000       0.045100   -9999.000000
56172     56172     sichuan        102.2333       31.9000          112       129     2012      02        08        039              0.128333       2.899445       0.399400       0.200544   -9999.000000   -9999.000000       0.042100       0.438000
56172     56172     sichuan        102.2333       31.9000          112       129     2012      02        09        040              0.127917       3.664978       0.000000       0.208442   -9999.000000   -9999.000000   -9999.000000   -9999.000000
56172     56172     sichuan        102.2333       31.9000          112       129     2012      02        10        041              0.126542       3.144714       0.000000       0.214585   -9999.000000   -9999.000000   -9999.000000   -9999.000000
56172     56172     sichuan        102.2333       31.9000          112       129     2012      02        11        042              0.127000       0.574554       0.000000       0.179249   -9999.000000   -9999.000000       0.042900       0.304000
56172     56172     sichuan        102.2333       31.9000          112       129     2012      02        12        043              0.125333       1.280518       0.000000       0.185478   -9999.000000   -9999.000000       0.043900   -9999.000000
56172     56172     sichuan        102.2333       31.9000          112       129     2012      02        13        044              0.124500       0.688324       0.000000       0.178308   -9999.000000   -9999.000000       0.022600       0.205000
56172     56172     sichuan        102.2333       31.9000          112       129     2012      02        14        045              0.124957       0.953339       0.000000       0.182640   -9999.000000   -9999.000000   -9999.000000   -9999.000000
56172     56172     sichuan        102.2333       31.9000          112       129     2012      02        15        046              0.124333       1.754120       0.000000       0.194573   -9999.000000   -9999.000000   -9999.000000   -9999.000000
56172     56172     sichuan        102.2333       31.9000          112       129     2012      02        16        047              0.124042       2.783875       0.000000       0.210167       0.108000   -9999.000000       0.029500       0.337000
56172     56172     sichuan        102.2333       31.9000          112       129     2012      02        17        048              0.122409       4.256104       0.000000       0.222132   -9999.000000   -9999.000000       0.036300   -9999.000000
56172     56172     sichuan        102.2333       31.9000          112       129     2012      02        18        049              0.120417       4.516541       0.000000       0.226841   -9999.000000   -9999.000000       0.019200       0.041000
56172     56172     sichuan        102.2333       31.9000          112       129     2012      02        19        050              0.119833       1.486420       0.000000       0.191363   -9999.000000   -9999.000000       0.025300   -9999.000000
56172     56172     sichuan        102.2333       31.9000          112       129     2012      02        20        051              0.119167       1.269531       0.252232       0.181122       0.124000   -9999.000000   -9999.000000       0.137000
56172     56172     sichuan        102.2333       31.9000          112       129     2012      02        21        052              0.118478       2.321228       0.000000       0.192429       0.099000   -9999.000000   -9999.000000       0.311000
56172     56172     sichuan        102.2333       31.9000          112       129     2012      02        22        053              0.116696       4.301575       1.886209       0.216163       0.090000   -9999.000000       0.032400   -9999.000000
56172     56172     sichuan        102.2333       31.9000          112       129     2012      02        23        054              0.116000       4.497864       0.000000       0.222016   -9999.000000   -9999.000000       0.026600       0.261000
56172     56172     sichuan        102.2333       31.9000          112       129     2012      02        24        055              0.114167       5.396301       0.000000       0.224170   -9999.000000   -9999.000000       0.043300   -9999.000000
56172     56172     sichuan        102.2333       31.9000          112       129     2012      02        25        056              0.112208       6.403351       0.301562       0.225255   -9999.000000   -9999.000000       0.037200       0.362000
56172     56172     sichuan        102.2333       31.9000          112       129     2012      02        26        057              0.110583       5.963379       0.000000       0.223254       0.096000   -9999.000000   -9999.000000   -9999.000000
56172     56172     sichuan        102.2333       31.9000          112       129     2012      02        27        058              0.109348       5.202423       0.000000       0.223941   -9999.000000   -9999.000000   -9999.000000       0.275000
56172     56172     sichuan        102.2333       31.9000          112       129     2012      02        28        059              0.109417       3.394318       0.489062       0.206292       0.085000   -9999.000000   -9999.000000       0.138000
56172     56172     sichuan        102.2333       31.9000          112       129     2012      02        29        060              0.000000   -9999.000000       0.069667   -9999.000000   -9999.000000   -9999.000000   -9999.000000   -9999.000000
56172     56172     sichuan        102.2333       31.9000          112       129     2012      03        01        061              0.105864       5.773743       0.000000       0.224854   -9999.000000   -9999.000000       0.034500       0.157000
56172     56172     sichuan        102.2333       31.9000          112       129     2012      03        02        062              0.106750       4.334778       0.000000       0.224546   -9999.000000   -9999.000000   -9999.000000   -9999.000000
56172     56172     sichuan        102.2333       31.9000          112       129     2012      03        03        063              0.107167       4.260101       0.000000       0.217400   -9999.000000   -9999.000000   -9999.000000       0.222000
56172     56172     sichuan        102.2333       31.9000          112       129     2012      03        04        064              0.106792       3.563324       0.000000       0.211362   -9999.000000   -9999.000000       0.037900   -9999.000000
56172     56172     sichuan        102.2333       31.9000          112       129     2012      03        05        065              0.108250       2.796753       0.107617       0.205029   -9999.000000   -9999.000000       0.035700   -9999.000000
56172     56172     sichuan        102.2333       31.9000          112       129     2012      03        06        066              0.108542       4.847229       0.294732       0.215141   -9999.000000   -9999.000000       0.019400       0.446000
56172     56172     sichuan        102.2333       31.9000          112       129     2012      03        07        067              0.000000       6.247101       0.000000       0.226261       0.121000   -9999.000000       0.041300   -9999.000000
56172     56172     sichuan        102.2333       31.9000          112       129     2012      03        08        068              0.106667       7.524780       0.306250       0.231954       0.098000   -9999.000000   -9999.000000       0.231000
56172     56172     sichuan        102.2333       31.9000          112       129     2012      03        09        069              0.104792       6.293793       0.000000       0.230284       0.086000   -9999.000000   -9999.000000   -9999.000000
56172     56172     sichuan        102.2333       31.9000          112       129     2012      03        10        070              0.103792       4.703644       0.000000       0.221039   -9999.000000   -9999.000000       0.031000   -9999.000000
56172     56172     sichuan        102.2333       31.9000          112       129     2012      03        11        071              0.101958       6.864319       0.000000       0.227176   -9999.000000   -9999.000000       0.022000       0.386000
56172     56172     sichuan        102.2333       31.9000          112       129     2012      03        12        072              0.100542       7.418427       0.000000       0.232094       0.116000   -9999.000000       0.035600   -9999.000000
56172     56172     sichuan        102.2333       31.9000          112       129     2012      03        13        073              0.098875       7.715363       0.000000       0.230908       0.107000   -9999.000000       0.036000       0.429000
56172     56172     sichuan        102.2333       31.9000          112       129     2012      03        14        074              0.096917       9.326752       1.698990       0.230378       0.106000   -9999.000000   -9999.000000   -9999.000000
56172     56172     sichuan        102.2333       31.9000          112       129     2012      03        15        075              0.096208       9.040283       0.000000       0.233405       0.089000   -9999.000000       0.020200   -9999.000000
56172     56172     sichuan        102.2333       31.9000          112       129     2012      03        16        076              0.094000       8.199371       0.000000       0.232684   -9999.000000   -9999.000000       0.025800       0.338000
56172     56172     sichuan        102.2333       31.9000          112       129     2012      03        17        077              0.000000       6.390076       0.000000       0.225748   -9999.000000   -9999.000000       0.018900   -9999.000000
56172     56172     sichuan        102.2333       31.9000          112       129     2012      03        18        078              0.000000       7.413635       0.000000       0.218142       0.119000   -9999.000000       0.032300       0.431000
56172     56172     sichuan        102.2333       31.9000          112       129     2012      03        19        079              0.000000       8.337219       0.000000       0.221414       0.114000   -9999.000000   -9999.000000   -9999.000000
56172     56172     sichuan        102.2333       31.9000          112       129     2012      03        20        080              0.000000       8.229828       0.134853       0.221353       0.094000   -9999.000000   -9999.000000       0.463000
56172     56172     sichuan        102.2333       31.9000          112       129     2012      03        21        081              0.000000      10.371857       0.896415       0.223602   -9999.000000   -9999.000000       0.025300       0.554000
56172     56172     sichuan        102.2333       31.9000          112       129     2012      03        22        082              0.000000      11.189301       0.000000       0.223262   -9999.000000   -9999.000000       0.026600   -9999.000000
56172     56172     sichuan        102.2333       31.9000          112       129     2012      03        23        083              0.000000       8.513458       0.000000       0.221098   -9999.000000   -9999.000000       0.031000       0.163000
56172     56172     sichuan        102.2333       31.9000          112       129     2012      03        24        084              0.000000       5.075531       0.000000       0.221622       0.126000   -9999.000000       0.034100   -9999.000000
56172     56172     sichuan        102.2333       31.9000          112       129     2012      03        25        085              0.000000       7.194855       0.000000       0.222003       0.110000   -9999.000000   -9999.000000       0.353000
56172     56172     sichuan        102.2333       31.9000          112       129     2012      03        26        086              0.000000       7.552307       1.028655       0.223554   -9999.000000   -9999.000000   -9999.000000   -9999.000000
56172     56172     sichuan        102.2333       31.9000          112       129     2012      03        27        087              0.085000       9.605225       0.572677       0.224791   -9999.000000   -9999.000000       0.032900       0.721000
56172     56172     sichuan        102.2333       31.9000          112       129     2012      03        28        088              0.088400      10.866669       0.698121       0.225431       0.138000   -9999.000000       0.030800       0.446000
56172     56172     sichuan        102.2333       31.9000          112       129     2012      03        29        089              0.118250      12.253296       0.383469       0.222436   -9999.000000   -9999.000000       0.036500   -9999.000000
56172     56172     sichuan        102.2333       31.9000          112       129     2012      03        30        090              0.140500       6.667206       0.000000       0.226520   -9999.000000   -9999.000000       0.033800       0.398000
56172     56172     sichuan        102.2333       31.9000          112       129     2012      03        31        091              0.136333       5.723663       0.000000       0.219996   -9999.000000   -9999.000000   -9999.000000   -9999.000000
56172     56172     sichuan        102.2333       31.9000          112       129     2012      04        01        092              0.127917       6.028748       0.000000       0.212135   -9999.000000   -9999.000000       0.025300       0.530000
56172     56172     sichuan        102.2333       31.9000          112       129     2012      04        02        093              0.122000       7.716095       1.986826       0.215926   -9999.000000   -9999.000000       0.035100   -9999.000000
56172     56172     sichuan        102.2333       31.9000          112       129     2012      04        03        094              0.117292      10.786102       0.931268       0.219117       0.141000   -9999.000000       0.034200   -9999.000000
56172     56172     sichuan        102.2333       31.9000          112       129     2012      04        04        095              0.110750      13.159302       0.331443       0.220271       0.121000   -9999.000000       0.045900       0.681000
56172     56172     sichuan        102.2333       31.9000          112       129     2012      04        05        096              0.193042      10.851349       0.000000       0.222722   -9999.000000   -9999.000000   -9999.000000   -9999.000000
56172     56172     sichuan        102.2333       31.9000          112       129     2012      04        06        097              0.187208       7.137390       0.000000       0.224817   -9999.000000   -9999.000000   -9999.000000       0.642000
56172     56172     sichuan        102.2333       31.9000          112       129     2012      04        07        098              0.183000       7.820618       0.000000       0.226681   -9999.000000   -9999.000000       0.032500   -9999.000000
56172     56172     sichuan        102.2333       31.9000          112       129     2012      04        08        099              0.174875       6.698975       0.617644       0.227717       0.133000   -9999.000000       0.029200   -9999.000000
56172     56172     sichuan        102.2333       31.9000          112       129     2012      04        09        100              0.171542       8.042664       0.543351       0.229166       0.133000   -9999.000000       0.043100       0.578000
56172     56172     sichuan        102.2333       31.9000          112       129     2012      04        10        101              0.158833       9.675018       1.488386       0.228291       0.117000   -9999.000000       0.043400   -9999.000000
56172     56172     sichuan        102.2333       31.9000          112       129     2012      04        11        102              0.150083      11.793365       2.467115       0.231748   -9999.000000   -9999.000000   -9999.000000       0.636000
56172     56172     sichuan        102.2333       31.9000          112       129     2012      04        12        103              0.145000      13.384674       0.379750       0.237244   -9999.000000   -9999.000000   -9999.000000   -9999.000000
56172     56172     sichuan        102.2333       31.9000          112       129     2012      04        13        104              0.192167       7.984161       1.146941       0.235984       0.147000   -9999.000000       0.035500   -9999.000000
56172     56172     sichuan        102.2333       31.9000          112       129     2012      04        14        105              0.203625       9.925995       1.529232       0.237809       0.131000   -9999.000000       0.035500       0.399000
56172     56172     sichuan        102.2333       31.9000          112       129     2012      04        15        106              0.204542      11.428925       1.738890       0.240595       0.126000   -9999.000000       0.044600   -9999.000000
56172     56172     sichuan        102.2333       31.9000          112       129     2012      04        16        107              0.213958      10.646179       0.356492       0.243308   -9999.000000   -9999.000000       0.041200       0.640000
56172     56172     sichuan        102.2333       31.9000          112       129     2012      04        17        108              0.211875       9.572174       0.528379       0.241223   -9999.000000   -9999.000000   -9999.000000   -9999.000000
56172     56172     sichuan        102.2333       31.9000          112       129     2012      04        18        109              0.200958       6.772949       0.958588       0.233545       0.139000   -9999.000000   -9999.000000       0.524000
56172     56172     sichuan        102.2333       31.9000          112       129     2012      04        19        110              0.202250       8.843750       0.000000       0.234686       0.125000   -9999.000000       0.023400       0.271000
56172     56172     sichuan        102.2333       31.9000          112       129     2012      04        20        111              0.192208       6.759674       0.254311       0.231031   -9999.000000   -9999.000000       0.018600   -9999.000000
56172     56172     sichuan        102.2333       31.9000          112       129     2012      04        21        112              0.181750       8.073090       1.204980       0.224912   -9999.000000   -9999.000000       0.037300       0.515000
56172     56172     sichuan        102.2333       31.9000          112       129     2012      04        22        113              0.170250       9.649689       0.628333       0.230994       0.132000   -9999.000000   -9999.000000   -9999.000000
56172     56172     sichuan        102.2333       31.9000          112       129     2012      04        23        114              0.171125      13.451813       2.246094       0.228895   -9999.000000   -9999.000000   -9999.000000       0.537000
56172     56172     sichuan        102.2333       31.9000          112       129     2012      04        24        115              0.190125      13.152344       0.118598       0.236711       0.126000   -9999.000000       0.037800   -9999.000000
56172     56172     sichuan        102.2333       31.9000          112       129     2012      04        25        116              0.000000      10.595520       0.523177       0.236619       0.122000   -9999.000000       0.029100       0.459000
56172     56172     sichuan        102.2333       31.9000          112       129     2012      04        26        117              0.157250      10.492737       0.934905       0.229287       0.103000   -9999.000000       0.045400       0.383000
56172     56172     sichuan        102.2333       31.9000          112       129     2012      04        27        118              0.151750      11.187164       0.848145       0.229740   -9999.000000   -9999.000000       0.045800   -9999.000000
56172     56172     sichuan        102.2333       31.9000          112       129     2012      04        28        119              0.153708      11.448547       0.477539       0.231151   -9999.000000   -9999.000000   -9999.000000       0.565000
56172     56172     sichuan        102.2333       31.9000          112       129     2012      04        29        120              0.146708      12.422089       0.569564       0.228931       0.132000   -9999.000000   -9999.000000   -9999.000000
56172     56172     sichuan        102.2333       31.9000          112       129     2012      04        30        121              0.155667      11.867798      10.243903       0.227451   -9999.000000   -9999.000000       0.035900       0.438000
56172     56172     sichuan        102.2333       31.9000          112       129     2012      05        01        122              0.208833      12.042999       2.068995       0.248531       0.170000   -9999.000000       0.041300   -9999.000000
56172     56172     sichuan        102.2333       31.9000          112       129     2012      05        02        123              0.205458       9.981079       2.571914       0.268610   -9999.000000   -9999.000000       0.041900   -9999.000000
56172     56172     sichuan        102.2333       31.9000          112       129     2012      05        03        124              0.208667      12.749084       4.630268       0.261067   -9999.000000   -9999.000000       0.045100       0.593000
56172     56172     sichuan        102.2333       31.9000          112       129     2012      05        04        125              0.204667      11.360596       5.626364       0.267817       0.184000   -9999.000000   -9999.000000   -9999.000000
56172     56172     sichuan        102.2333       31.9000          112       129     2012      05        05        126              0.189583      13.147186       1.006308       0.263553       0.174000   -9999.000000       0.031000       0.729000
56172     56172     sichuan        102.2333       31.9000          112       129     2012      05        06        127              0.172792      15.230988       0.845533       0.251168       0.149000   -9999.000000       0.031300   -9999.000000
56172     56172     sichuan        102.2333       31.9000          112       129     2012      05        07        128              0.153542      16.154297       1.098679       0.242688   -9999.000000   -9999.000000       0.053600   -9999.000000
56172     56172     sichuan        102.2333       31.9000          112       129     2012      05        08        129              0.138542      16.175507       1.638538       0.238412   -9999.000000   -9999.000000       0.058400       0.510000
56172     56172     sichuan        102.2333       31.9000          112       129     2012      05        09        130              0.126167      15.012512       0.716554       0.240909       0.171000   -9999.000000   -9999.000000   -9999.000000
56172     56172     sichuan        102.2333       31.9000          112       129     2012      05        10        131              0.116542      15.740387       1.653792       0.234542       0.165000   -9999.000000   -9999.000000       0.709000
56172     56172     sichuan        102.2333       31.9000          112       129     2012      05        11        132              0.112458      18.050354       4.303876       0.229534   -9999.000000   -9999.000000       0.056400   -9999.000000
56172     56172     sichuan        102.2333       31.9000          112       129     2012      05        12        133              0.129250      15.509674       0.679265       0.240281       0.209000   -9999.000000       0.055700   -9999.000000
56172     56172     sichuan        102.2333       31.9000          112       129     2012      05        13        134              0.124542      13.830750       1.010554       0.248110   -9999.000000   -9999.000000       0.053700       0.486000
56172     56172     sichuan        102.2333       31.9000          112       129     2012      05        14        135              0.122042      11.942566       1.925635       0.243382   -9999.000000   -9999.000000       0.078200   -9999.000000
56172     56172     sichuan        102.2333       31.9000          112       129     2012      05        15        136              0.136417      10.343018       5.394285       0.247278       0.215000   -9999.000000   -9999.000000       0.475000
56172     56172     sichuan        102.2333       31.9000          112       129     2012      05        16        137              0.179375      12.465057       0.270762       0.257721       0.245000   -9999.000000   -9999.000000   -9999.000000
56172     56172     sichuan        102.2333       31.9000          112       129     2012      05        17        138              0.174000      11.092743       3.896641       0.263819       0.236000   -9999.000000       0.077100       0.589000
56172     56172     sichuan        102.2333       31.9000          112       129     2012      05        18        139              0.190167      14.278778       2.571919       0.260872   -9999.000000   -9999.000000       0.069000       0.525000
56172     56172     sichuan        102.2333       31.9000          112       129     2012      05        19        140              0.160292      13.758453       3.197586       0.263165   -9999.000000   -9999.000000       0.077800   -9999.000000
56172     56172     sichuan        102.2333       31.9000          112       129     2012      05        20        141              0.133583      16.524231       2.655602       0.255355       0.219000   -9999.000000       0.082000       0.727000
56172     56172     sichuan        102.2333       31.9000          112       129     2012      05        21        142              0.118083      18.533356       1.686193       0.244822       0.220500   -9999.000000   -9999.000000   -9999.000000
56172     56172     sichuan        102.2333       31.9000          112       129     2012      05        22        143              0.120875      18.789337       7.385727       0.244654       0.200000   -9999.000000       0.099900       0.705000
56172     56172     sichuan        102.2333       31.9000          112       129     2012      05        23        144              0.149708      15.420837       6.839119       0.266696   -9999.000000   -9999.000000       0.103000   -9999.000000
56172     56172     sichuan        102.2333       31.9000          112       129     2012      05        24        145              0.186042      16.175568      12.338536       0.276015   -9999.000000   -9999.000000       0.104100       0.681000
56172     56172     sichuan        102.2333       31.9000          112       129     2012      05        25        146              0.000000      12.373810       0.114759       0.294113       0.254000   -9999.000000       0.105500       0.655000
56172     56172     sichuan        102.2333       31.9000          112       129     2012      05        26        147              0.167333      13.834320       0.284502       0.285275       0.208000   -9999.000000   -9999.000000   -9999.000000
56172     56172     sichuan        102.2333       31.9000          112       129     2012      05        27        148              0.150208      15.964325       4.813323       0.268116       0.190000   -9999.000000   -9999.000000       0.807000
56172     56172     sichuan        102.2333       31.9000          112       129     2012      05        28        149              0.158500      16.998627       9.329333       0.273670   -9999.000000   -9999.000000   -9999.000000   -9999.000000
56172     56172     sichuan        102.2333       31.9000          112       129     2012      05        29        150              0.161208      17.094727       7.497265       0.286910       0.245000   -9999.000000       0.101600       0.810000
56172     56172     sichuan        102.2333       31.9000          112       129     2012      05        30        151              0.168417      16.511993      18.433144       0.280760       0.233000   -9999.000000       0.098800   -9999.000000
56172     56172     sichuan        102.2333       31.9000          112       129     2012      05        31        152              0.197500      16.469788       4.277201       0.305651       0.241000   -9999.000000       0.101100   -9999.000000
56172     56172     sichuan        102.2333       31.9000          112       129     2012      06        01        153              0.182792      13.107117       1.154268       0.304473       0.366500   -9999.000000   -9999.000000       0.833000
56172     56172     sichuan        102.2333       31.9000          112       129     2012      06        02        154              0.186167      16.104645      33.595974       0.285141       0.318000   -9999.000000   -9999.000000   -9999.000000
56172     56172     sichuan        102.2333       31.9000          112       129     2012      06        03        155              0.214208      12.919281       7.380947       0.313768   -9999.000000   -9999.000000   -9999.000000       0.842000
56172     56172     sichuan        102.2333       31.9000          112       129     2012      06        04        156              0.202583      11.017883       6.339013       0.316788       0.434000   -9999.000000       0.087700   -9999.000000
56172     56172     sichuan        102.2333       31.9000          112       129     2012      06        05        157              0.204833      13.124359      12.014943       0.303460       0.394000   -9999.000000       0.075500   -9999.000000
56172     56172     sichuan        102.2333       31.9000          112       129     2012      06        06        158              0.219417      15.494446      18.182447       0.309549       0.399500   -9999.000000   -9999.000000       0.950000
56172     56172     sichuan        102.2333       31.9000          112       129     2012      06        07        159              0.209833      14.523987       3.186543       0.318699       0.346000   -9999.000000   -9999.000000   -9999.000000
56172     56172     sichuan        102.2333       31.9000          112       129     2012      06        08        160              0.213000      16.091370       2.947972       0.301312   -9999.000000   -9999.000000       0.075100       0.924000
56172     56172     sichuan        102.2333       31.9000          112       129     2012      06        09        161              0.221042      14.874298      20.894955       0.295079       0.439000   -9999.000000       0.079300   -9999.000000
56172     56172     sichuan        102.2333       31.9000          112       129     2012      06        10        162              0.221833      15.237915      15.699901       0.311212       0.395500   -9999.000000       0.077900   -9999.000000
56172     56172     sichuan        102.2333       31.9000          112       129     2012      06        11        163              0.000000      13.699707       0.614383       0.316510       0.376500   -9999.000000       0.058700       0.767000
56172     56172     sichuan        102.2333       31.9000          112       129     2012      06        12        164              0.205667      12.803711       0.610193       0.300811       0.344000   -9999.000000   -9999.000000   -9999.000000
56172     56172     sichuan        102.2333       31.9000          112       129     2012      06        13        165              0.206667      14.405975       3.457767       0.288700   -9999.000000   -9999.000000   -9999.000000       0.809000
56172     56172     sichuan        102.2333       31.9000          112       129     2012      06        14        166              0.201042      14.429321       1.896060       0.290612   -9999.000000   -9999.000000       0.055500   -9999.000000
56172     56172     sichuan        102.2333       31.9000          112       129     2012      06        15        167              0.197833      15.696747       1.647478       0.281215       0.378000   -9999.000000       0.062100       0.787000
56172     56172     sichuan        102.2333       31.9000          112       129     2012      06        16        168              0.221708      13.067322       8.276682       0.284098       0.376000   -9999.000000       0.057500       0.754000
56172     56172     sichuan        102.2333       31.9000          112       129     2012      06        17        169              0.221792      12.108246       7.283611       0.298889       0.300000   -9999.000000       0.050000   -9999.000000
56172     56172     sichuan        102.2333       31.9000          112       129     2012      06        18        170              0.216458      15.212341       1.973289       0.296768       0.306000   -9999.000000   -9999.000000       0.786000
56172     56172     sichuan        102.2333       31.9000          112       129     2012      06        19        171              0.202450      14.907654       1.403643       0.287175       0.371000   -9999.000000       0.086100   -9999.000000
56172     56172     sichuan        102.2333       31.9000          112       129     2012      06        20        172              0.203000      16.167480       4.745766       0.281453       0.349000   -9999.000000       0.088700       0.925000
56172     56172     sichuan        102.2333       31.9000          112       129     2012      06        21        173              0.211958      14.336639       2.910741       0.286446       0.321000   -9999.000000       0.091300   -9999.000000
56172     56172     sichuan        102.2333       31.9000          112       129     2012      06        22        174              0.226500      14.959503       1.778949       0.285533   -9999.000000   -9999.000000       0.090000       0.665000
56172     56172     sichuan        102.2333       31.9000          112       129     2012      06        23        175              0.213125      14.523560       0.123166       0.285044       0.274000   -9999.000000   -9999.000000       0.708000
56172     56172     sichuan        102.2333       31.9000          112       129     2012      06        24        176              0.212542      16.285370       5.055230       0.274224   -9999.000000   -9999.000000   -9999.000000   -9999.000000
56172     56172     sichuan        102.2333       31.9000          112       129     2012      06        25        177              0.221708      14.782135       1.393269       0.282367       0.361000   -9999.000000       0.051400       0.930000
56172     56172     sichuan        102.2333       31.9000          112       129     2012      06        26        178              0.220833      16.202454       7.500509       0.283541   -9999.000000   -9999.000000       0.051300   -9999.000000
56172     56172     sichuan        102.2333       31.9000          112       129     2012      06        27        179              0.224833      16.528046       8.368203       0.288571       0.318000   -9999.000000       0.049200       0.789000
56172     56172     sichuan        102.2333       31.9000          112       129     2012      06        28        180              0.232667      17.949982      26.025955       0.299464       0.277000   -9999.000000       0.049700   -9999.000000
56172     56172     sichuan        102.2333       31.9000          112       129     2012      06        29        181              0.240458      18.403076      28.002794       0.314431   -9999.000000   -9999.000000   -9999.000000   -9999.000000
56172     56172     sichuan        102.2333       31.9000          112       129     2012      06        30        182              0.238792      16.792084       7.298567       0.327694       0.351000   -9999.000000   -9999.000000   -9999.000000
56172     56172     sichuan        102.2333       31.9000          112       129     2012      07        01        183              0.235958      16.615540      10.525542       0.314503       0.471500   -9999.000000       0.053200   -9999.000000
56172     56172     sichuan        102.2333       31.9000          112       129     2012      07        02        184              0.238792      17.580292       7.213536       0.308727       0.430000   -9999.000000       0.072900       1.000000
56172     56172     sichuan        102.2333       31.9000          112       129     2012      07        03        185              0.239458      16.276550      25.727856       0.310093   -9999.000000   -9999.000000       0.057600   -9999.000000
56172     56172     sichuan        102.2333       31.9000          112       129     2012      07        04        186              0.230417      15.803680       0.000000       0.319756   -9999.000000   -9999.000000       0.072200   -9999.000000
56172     56172     sichuan        102.2333       31.9000          112       129     2012      07        05        187              0.216583      15.270660       0.000000       0.303030   -9999.000000   -9999.000000   -9999.000000       0.932000
56172     56172     sichuan        102.2333       31.9000          112       129     2012      07        06        188              0.219125      17.785370      18.956673       0.292009   -9999.000000   -9999.000000       0.069700   -9999.000000
56172     56172     sichuan        102.2333       31.9000          112       129     2012      07        07        189              0.227417      16.634949       1.159342       0.316544   -9999.000000   -9999.000000       0.069900       0.928000
56172     56172     sichuan        102.2333       31.9000          112       129     2012      07        08        190              0.220083      17.800659       2.086662       0.300921       0.421000   -9999.000000       0.069900   -9999.000000
56172     56172     sichuan        102.2333       31.9000          112       129     2012      07        09        191              0.214500      18.314972       1.494690       0.297087       0.369000   -9999.000000       0.122100   -9999.000000
56172     56172     sichuan        102.2333       31.9000          112       129     2012      07        10        192              0.220375      18.095825       0.949578       0.292606   -9999.000000   -9999.000000   -9999.000000       0.885000
56172     56172     sichuan        102.2333       31.9000          112       129     2012      07        11        193              0.237875      19.139282      10.024736       0.287679       0.394000   -9999.000000   -9999.000000   -9999.000000
56172     56172     sichuan        102.2333       31.9000          112       129     2012      07        12        194              0.234375      16.737396       0.312357       0.301515       0.350500   -9999.000000       0.121200       0.739000
56172     56172     sichuan        102.2333       31.9000          112       129     2012      07        13        195              0.241542      15.461243       0.000000       0.294729       0.302500   -9999.000000       0.118800   -9999.000000
56172     56172     sichuan        102.2333       31.9000          112       129     2012      07        14        196              0.294750      18.295959      13.143496       0.283927   -9999.000000       0.051800       0.122200       1.000000
56172     56172     sichuan        102.2333       31.9000          112       129     2012      07        15        197              0.291708      14.357758       0.305406       0.308879   -9999.000000   -9999.000000       0.123500       0.795000
56172     56172     sichuan        102.2333       31.9000          112       129     2012      07        16        198              0.285042      15.713379       2.005857       0.292702       0.371000   -9999.000000   -9999.000000   -9999.000000
56172     56172     sichuan        102.2333       31.9000          112       129     2012      07        17        199              0.302125      17.305084      26.268881       0.289595       0.335500   -9999.000000   -9999.000000       0.961000
56172     56172     sichuan        102.2333       31.9000          112       129     2012      07        18        200              0.312667      16.648315      48.305809       0.320259       0.363000   -9999.000000       0.177400   -9999.000000
56172     56172     sichuan        102.2333       31.9000          112       129     2012      07        19        201              0.316208      17.306793      15.917198       0.335803       0.288000   -9999.000000       0.189200       0.870000
56172     56172     sichuan        102.2333       31.9000          112       129     2012      07        20        202              0.306083      17.250580       4.301761       0.327559       0.262000   -9999.000000       0.171000   -9999.000000
56172     56172     sichuan        102.2333       31.9000          112       129     2012      07        21        203              0.313000      18.697693       4.680701       0.317562   -9999.000000   -9999.000000       0.185700       0.858000
56172     56172     sichuan        102.2333       31.9000          112       129     2012      07        22        204              0.312667      16.865234      24.383661       0.313395   -9999.000000       0.108100   -9999.000000       0.944000
56172     56172     sichuan        102.2333       31.9000          112       129     2012      07        23        205              0.318958      16.216095      22.882706       0.322087   -9999.000000   -9999.000000       0.113900   -9999.000000
56172     56172     sichuan        102.2333       31.9000          112       129     2012      07        24        206              0.310708      14.075195       7.434733       0.333843   -9999.000000   -9999.000000       0.115100       0.955000
56172     56172     sichuan        102.2333       31.9000          112       129     2012      07        25        207              0.301833      16.440796       1.762632       0.321779   -9999.000000   -9999.000000       0.115500   -9999.000000
56172     56172     sichuan        102.2333       31.9000          112       129     2012      07        26        208              0.278792      17.922668       3.942990       0.310499   -9999.000000   -9999.000000       0.113700       0.770000
56172     56172     sichuan        102.2333       31.9000          112       129     2012      07        27        209              0.288875      18.860718       8.543658       0.304128   -9999.000000       0.047800   -9999.000000   -9999.000000
56172     56172     sichuan        102.2333       31.9000          112       129     2012      07        28        210              0.286417      16.391144       0.438536       0.313874   -9999.000000   -9999.000000   -9999.000000   -9999.000000
56172     56172     sichuan        102.2333       31.9000          112       129     2012      07        29        211              0.252708      18.022400       0.000000       0.299764   -9999.000000   -9999.000000       0.110600       0.935000
56172     56172     sichuan        102.2333       31.9000          112       129     2012      07        30        212              0.259250      18.855408      26.022408       0.293820   -9999.000000   -9999.000000       0.109700   -9999.000000
56172     56172     sichuan        102.2333       31.9000          112       129     2012      07        31        213              0.305625      18.989929      18.721304       0.317407   -9999.000000   -9999.000000       0.100600       1.000000
56172     56172     sichuan        102.2333       31.9000          112       129     2012      08        01        214              0.293833      15.969147       0.000000       0.321691   -9999.000000       0.087200       0.104300   -9999.000000
56172     56172     sichuan        102.2333       31.9000          112       129     2012      08        02        215              0.291375      15.710541       9.854307       0.305236   -9999.000000   -9999.000000   -9999.000000   -9999.000000
56172     56172     sichuan        102.2333       31.9000          112       129     2012      08        03        216              0.295083      17.346130       1.971831       0.307519   -9999.000000   -9999.000000   -9999.000000       0.844000
56172     56172     sichuan        102.2333       31.9000          112       129     2012      08        04        217              0.284958      18.325897       3.889304       0.302603   -9999.000000   -9999.000000       0.103000   -9999.000000
56172     56172     sichuan        102.2333       31.9000          112       129     2012      08        05        218              0.265042      18.029968       0.869258       0.302921   -9999.000000   -9999.000000       0.109500       0.866000
56172     56172     sichuan        102.2333       31.9000          112       129     2012      08        06        219              0.241667      17.456085       0.285646       0.296627   -9999.000000   -9999.000000       0.106500   -9999.000000
56172     56172     sichuan        102.2333       31.9000          112       129     2012      08        07        220              0.211583      18.447662       0.000000       0.290493   -9999.000000   -9999.000000   -9999.000000   -9999.000000
56172     56172     sichuan        102.2333       31.9000          112       129     2012      08        08        221              0.186500      19.051941       0.000000       0.285154       0.500000   -9999.000000   -9999.000000       0.800000
56172     56172     sichuan        102.2333       31.9000          112       129     2012      08        09        222              0.169833      19.291199       2.614136       0.280711       0.500000       0.097900       0.102300   -9999.000000
56172     56172     sichuan        102.2333       31.9000          112       129     2012      08        10        223              0.158375      19.488342       0.000000       0.281939       0.500000   -9999.000000       0.102700       0.708000
56172     56172     sichuan        102.2333       31.9000          112       129     2012      08        11        224              0.149833      19.849091       0.000000       0.276988   -9999.000000   -9999.000000       0.105600   -9999.000000
56172     56172     sichuan        102.2333       31.9000          112       129     2012      08        12        225              0.143792      19.950836       2.051316       0.272306       0.500000   -9999.000000       0.103800       0.696000
56172     56172     sichuan        102.2333       31.9000          112       129     2012      08        13        226              0.143500      20.361816       2.882066       0.274489       0.500000   -9999.000000   -9999.000000       0.581000
56172     56172     sichuan        102.2333       31.9000          112       129     2012      08        14        227              0.231417      19.298737      11.281533       0.282703       0.496000   -9999.000000   -9999.000000   -9999.000000
56172     56172     sichuan        102.2333       31.9000          112       129     2012      08        15        228              0.270208      18.984894       0.606231       0.303760       0.486000   -9999.000000       0.144000       0.641000
56172     56172     sichuan        102.2333       31.9000          112       129     2012      08        16        229              0.248000      19.446289       1.525511       0.288134       0.492000   -9999.000000       0.150000   -9999.000000
56172     56172     sichuan        102.2333       31.9000          112       129     2012      08        17        230              0.231792      20.364777      13.968725       0.280341   -9999.000000   -9999.000000       0.141500       0.715000
56172     56172     sichuan        102.2333       31.9000          112       129     2012      08        18        231              0.263250      19.750000      13.677636       0.299137   -9999.000000   -9999.000000       0.125900   -9999.000000
56172     56172     sichuan        102.2333       31.9000          112       129     2012      08        19        232              0.282917      18.581116       6.891435       0.310218       0.500000   -9999.000000   -9999.000000       0.868000
56172     56172     sichuan        102.2333       31.9000          112       129     2012      08        20        233              0.271000      15.374817       6.324767       0.308427       0.500000   -9999.000000       0.168500       0.567000
56172     56172     sichuan        102.2333       31.9000          112       129     2012      08        21        234              0.288750      17.188385      16.853918       0.295799   -9999.000000   -9999.000000       0.181100   -9999.000000
56172     56172     sichuan        102.2333       31.9000          112       129     2012      08        22        235              0.278458      13.495728       0.000000       0.319295   -9999.000000   -9999.000000       0.181800   -9999.000000
56172     56172     sichuan        102.2333       31.9000          112       129     2012      08        23        236              0.264042      14.434387       0.000000       0.294736   -9999.000000   -9999.000000       0.180300   -9999.000000
56172     56172     sichuan        102.2333       31.9000          112       129     2012      08        24        237              0.249458      15.940918       0.114582       0.285077   -9999.000000   -9999.000000   -9999.000000   -9999.000000
56172     56172     sichuan        102.2333       31.9000          112       129     2012      08        25        238              0.000000      15.986298       1.835220       0.281157   -9999.000000   -9999.000000   -9999.000000   -9999.000000
56172     56172     sichuan        102.2333       31.9000          112       129     2012      08        26        239              0.236958      15.089417       0.000000       0.284232       0.500000   -9999.000000       0.175100   -9999.000000
56172     56172     sichuan        102.2333       31.9000          112       129     2012      08        27        240              0.229958      16.524567       3.991367       0.278010   -9999.000000   -9999.000000       0.138500       0.907000
56172     56172     sichuan        102.2333       31.9000          112       129     2012      08        28        241              0.231333      16.513519       0.000000       0.284560   -9999.000000   -9999.000000       0.129800   -9999.000000
56172     56172     sichuan        102.2333       31.9000          112       129     2012      08        29        242              0.250583      16.564423       3.797789       0.281005   -9999.000000   -9999.000000       0.138500       1.000000
56172     56172     sichuan        102.2333       31.9000          112       129     2012      08        30        243              0.276708      15.602844       8.328248       0.287652       0.500000   -9999.000000   -9999.000000   -9999.000000
56172     56172     sichuan        102.2333       31.9000          112       129     2012      08        31        244              0.295375      17.036835      20.732304       0.294916   -9999.000000   -9999.000000   -9999.000000   -9999.000000
56172     56172     sichuan        102.2333       31.9000          112       129     2012      09        01        245              0.287375      16.812164       0.059212       0.310550       0.500000   -9999.000000       0.134200       0.770000
56172     56172     sichuan        102.2333       31.9000          112       129     2012      09        02        246              0.274083      14.759125       1.377919       0.303795   -9999.000000   -9999.000000       0.139400   -9999.000000
56172     56172     sichuan        102.2333       31.9000          112       129     2012      09        03        247              0.264913      15.299042       0.414905       0.287994   -9999.000000   -9999.000000       0.186000       0.626000
56172     56172     sichuan        102.2333       31.9000          112       129     2012      09        04        248              0.246958      14.802887       0.000000       0.282185       0.500000   -9999.000000       0.185700   -9999.000000
56172     56172     sichuan        102.2333       31.9000          112       129     2012      09        05        249              0.223833      15.229584      13.712265       0.277077       0.500000   -9999.000000   -9999.000000   -9999.000000
56172     56172     sichuan        102.2333       31.9000          112       129     2012      09        06        250              0.207250      15.759125       1.215351       0.273731       0.499000   -9999.000000       0.185100       0.688000
56172     56172     sichuan        102.2333       31.9000          112       129     2012      09        07        251              0.217208      16.547852       8.633128       0.274648   -9999.000000   -9999.000000       0.189000   -9999.000000
56172     56172     sichuan        102.2333       31.9000          112       129     2012      09        08        252              0.216875      16.282349       0.000000       0.293237       0.500000   -9999.000000       0.185200       0.553000
56172     56172     sichuan        102.2333       31.9000          112       129     2012      09        09        253              0.214958      16.290253       6.815691       0.283234       0.500000   -9999.000000       0.138800   -9999.000000
56172     56172     sichuan        102.2333       31.9000          112       129     2012      09        10        254              0.264875      16.696472       0.992294       0.290098       0.500000   -9999.000000   -9999.000000       0.724000
56172     56172     sichuan        102.2333       31.9000          112       129     2012      09        11        255              0.269167      15.738037      24.136559       0.289667       0.352000   -9999.000000   -9999.000000       0.632000
56172     56172     sichuan        102.2333       31.9000          112       129     2012      09        12        256              0.280250      16.338501       0.382356       0.303444       0.422000   -9999.000000       0.095300   -9999.000000
56172     56172     sichuan        102.2333       31.9000          112       129     2012      09        13        257              0.257375      12.892975       0.664735       0.304907   -9999.000000   -9999.000000       0.098600       0.624000
56172     56172     sichuan        102.2333       31.9000          112       129     2012      09        14        258              0.231833      13.325012       0.219556       0.287218   -9999.000000   -9999.000000       0.099900   -9999.000000
56172     56172     sichuan        102.2333       31.9000          112       129     2012      09        15        259              0.238583      13.285889      11.374977       0.280475       0.359000   -9999.000000       0.101200       0.660000
56172     56172     sichuan        102.2333       31.9000          112       129     2012      09        16        260              0.277750      13.018951       1.022018       0.292878       0.476000   -9999.000000   -9999.000000   -9999.000000
56172     56172     sichuan        102.2333       31.9000          112       129     2012      09        17        261              0.261458      11.828186       1.593831       0.295529       0.390000   -9999.000000   -9999.000000       0.628000
56172     56172     sichuan        102.2333       31.9000          112       129     2012      09        18        262              0.251750      13.488922       1.116467       0.288271   -9999.000000   -9999.000000       0.159000       0.565000
56172     56172     sichuan        102.2333       31.9000          112       129     2012      09        19        263              0.249083      11.488586      10.182626       0.286168   -9999.000000   -9999.000000       0.163100   -9999.000000
56172     56172     sichuan        102.2333       31.9000          112       129     2012      09        20        264              0.293125      14.670441       8.507744       0.296048       0.442000   -9999.000000       0.158500       1.000000
56172     56172     sichuan        102.2333       31.9000          112       129     2012      09        21        265              0.294042      14.782196       9.875078       0.306183   -9999.000000   -9999.000000       0.164400   -9999.000000
56172     56172     sichuan        102.2333       31.9000          112       129     2012      09        22        266              0.290333      13.934052      15.339593       0.304372       0.241000   -9999.000000   -9999.000000       0.823000
56172     56172     sichuan        102.2333       31.9000          112       129     2012      09        23        267              0.285917      15.724823       0.000000       0.312497   -9999.000000   -9999.000000       0.160500   -9999.000000
56172     56172     sichuan        102.2333       31.9000          112       129     2012      09        24        268              0.280875      15.249512      10.460041       0.299897       0.338000   -9999.000000       0.191700   -9999.000000
56172     56172     sichuan        102.2333       31.9000          112       129     2012      09        25        269              0.300667      16.236420      12.511770       0.297468   -9999.000000   -9999.000000       0.190600       0.990000
56172     56172     sichuan        102.2333       31.9000          112       129     2012      09        26        270              0.290750      13.625275       0.119645       0.312549       0.282000   -9999.000000       0.182500   -9999.000000
56172     56172     sichuan        102.2333       31.9000          112       129     2012      09        27        271              0.298643      13.943359       7.056935       0.301714       0.281000   -9999.000000   -9999.000000       0.769000
56172     56172     sichuan        102.2333       31.9000          112       129     2012      09        28        272              0.283933      12.626831       0.782268       0.303934       0.265000   -9999.000000   -9999.000000   -9999.000000
56172     56172     sichuan        102.2333       31.9000          112       129     2012      09        29        273              0.291625      13.832062       5.996840       0.292276   -9999.000000   -9999.000000       0.177300   -9999.000000
56172     56172     sichuan        102.2333       31.9000          112       129     2012      09        30        274              0.284208      12.484650       1.920614       0.300225   -9999.000000   -9999.000000       0.175700       0.648000
56172     56172     sichuan        102.2333       31.9000          112       129     2012      10        01        275              0.268917      12.841095       1.123295       0.289940       0.346500   -9999.000000       0.097800   -9999.000000
56172     56172     sichuan        102.2333       31.9000          112       129     2012      10        02        276              0.259917      12.964203       5.029203       0.287353   -9999.000000   -9999.000000       0.103100       0.735000
56172     56172     sichuan        102.2333       31.9000          112       129     2012      10        03        277              0.285625      12.743073       6.669126       0.289177       0.312000   -9999.000000   -9999.000000   -9999.000000
56172     56172     sichuan        102.2333       31.9000          112       129     2012      10        04        278              0.308125      12.402863      23.532804       0.301472   -9999.000000   -9999.000000   -9999.000000   -9999.000000
56172     56172     sichuan        102.2333       31.9000          112       129     2012      10        05        279              0.305125      10.553955       5.569382       0.313404   -9999.000000   -9999.000000       0.106100       0.796000
56172     56172     sichuan        102.2333       31.9000          112       129     2012      10        06        280              0.298292       9.040009       5.905649       0.315509       0.418000   -9999.000000       0.107800   -9999.000000
56172     56172     sichuan        102.2333       31.9000          112       129     2012      10        07        281              0.303792      11.283813       9.369545       0.308567       0.365000   -9999.000000       0.102400       0.710000
56172     56172     sichuan        102.2333       31.9000          112       129     2012      10        08        282              0.293042      12.357239       4.282957       0.312263   -9999.000000   -9999.000000       0.075600   -9999.000000
56172     56172     sichuan        102.2333       31.9000          112       129     2012      10        09        283              0.306000      11.723907       5.231617       0.302749       0.349000   -9999.000000   -9999.000000       0.669000
56172     56172     sichuan        102.2333       31.9000          112       129     2012      10        10        284              0.313708       9.965057      14.387896       0.305197   -9999.000000   -9999.000000       0.067400       0.705000
56172     56172     sichuan        102.2333       31.9000          112       129     2012      10        11        285              0.309292       9.111969      28.249306       0.314542   -9999.000000   -9999.000000       0.067600   -9999.000000
56172     56172     sichuan        102.2333       31.9000          112       129     2012      10        12        286              0.310833      10.292877      16.272243       0.325208       0.306000   -9999.000000       0.067400       0.637000
56172     56172     sichuan        102.2333       31.9000          112       129     2012      10        13        287              0.301375       8.209747      10.257148       0.325570       0.323000   -9999.000000       0.071000   -9999.000000
56172     56172     sichuan        102.2333       31.9000          112       129     2012      10        14        288              0.288542       8.694214      10.907227       0.322873       0.284000   -9999.000000   -9999.000000       0.715000
56172     56172     sichuan        102.2333       31.9000          112       129     2012      10        15        289              0.276250       9.791870       1.507275       0.319532   -9999.000000   -9999.000000   -9999.000000   -9999.000000
56172     56172     sichuan        102.2333       31.9000          112       129     2012      10        16        290              0.264583      10.169464       1.996382       0.312357   -9999.000000   -9999.000000       0.085600       0.475000
56172     56172     sichuan        102.2333       31.9000          112       129     2012      10        17        291              0.252792       8.621307       1.851213       0.303760       0.327000   -9999.000000       0.091200       0.547000
56172     56172     sichuan        102.2333       31.9000          112       129     2012      10        18        292              0.240000       8.768982       3.713401       0.301809       0.306000   -9999.000000       0.091200   -9999.000000
56172     56172     sichuan        102.2333       31.9000          112       129     2012      10        19        293              0.234375       9.873901       0.457643       0.302714       0.275000   -9999.000000       0.093700       0.714000
56172     56172     sichuan        102.2333       31.9000          112       129     2012      10        20        294              0.223125       9.364166       1.565550       0.299853   -9999.000000   -9999.000000   -9999.000000   -9999.000000
56172     56172     sichuan        102.2333       31.9000          112       129     2012      10        21        295              0.213542       9.034637       0.129118       0.296966   -9999.000000   -9999.000000       0.085900       0.601000
56172     56172     sichuan        102.2333       31.9000          112       129     2012      10        22        296              0.207958       9.738983       0.054230       0.292009   -9999.000000   -9999.000000       0.062700   -9999.000000
56172     56172     sichuan        102.2333       31.9000          112       129     2012      10        23        297              0.206292      10.147675       2.538980       0.288360   -9999.000000   -9999.000000       0.062700   -9999.000000
56172     56172     sichuan        102.2333       31.9000          112       129     2012      10        24        298              0.225208       8.937500       4.505962       0.291754   -9999.000000   -9999.000000       0.065900       0.517000
56172     56172     sichuan        102.2333       31.9000          112       129     2012      10        25        299              0.000000       8.751770       1.571978       0.292195       0.233000   -9999.000000   -9999.000000   -9999.000000
56172     56172     sichuan        102.2333       31.9000          112       129     2012      10        26        300              0.257250       8.081451       3.590775       0.295147   -9999.000000   -9999.000000   -9999.000000       0.543000
56172     56172     sichuan        102.2333       31.9000          112       129     2012      10        27        301              0.239542       8.690369       0.452226       0.293491   -9999.000000   -9999.000000       0.059500   -9999.000000
56172     56172     sichuan        102.2333       31.9000          112       129     2012      10        28        302              0.000000       8.249725       1.875621       0.287742       0.280000   -9999.000000       0.063100   -9999.000000
56172     56172     sichuan        102.2333       31.9000          112       129     2012      10        29        303              0.209917       8.386993       1.590974       0.286378       0.238000   -9999.000000       0.075200       0.455000
56172     56172     sichuan        102.2333       31.9000          112       129     2012      10        30        304              0.202167       7.312286       1.208945       0.287260   -9999.000000   -9999.000000       0.075900   -9999.000000
56172     56172     sichuan        102.2333       31.9000          112       129     2012      10        31        305              0.196833       5.445160       2.273923       0.280597   -9999.000000   -9999.000000   -9999.000000       0.550000
56172     56172     sichuan        102.2333       31.9000          112       129     2012      11        01        306              0.191250       5.063354       1.571751       0.278594   -9999.000000   -9999.000000   -9999.000000   -9999.000000
56172     56172     sichuan        102.2333       31.9000          112       129     2012      11        02        307              0.185750       4.633789       1.513636       0.271128       0.297000   -9999.000000       0.074700   -9999.000000
56172     56172     sichuan        102.2333       31.9000          112       129     2012      11        03        308              0.180375       4.761322       1.472495       0.269846   -9999.000000   -9999.000000       0.071500       0.387000
56172     56172     sichuan        102.2333       31.9000          112       129     2012      11        04        309              0.177208       4.177460       0.639620       0.259063       0.253000   -9999.000000       0.080600   -9999.000000
56172     56172     sichuan        102.2333       31.9000          112       129     2012      11        05        310              0.174708       3.678925       0.572594       0.255564   -9999.000000   -9999.000000       0.059800       0.429000
56172     56172     sichuan        102.2333       31.9000          112       129     2012      11        06        311              0.172250       4.635040       1.550136       0.261635   -9999.000000   -9999.000000   -9999.000000   -9999.000000
56172     56172     sichuan        102.2333       31.9000          112       129     2012      11        07        312              0.169333       5.542755       3.681147       0.269431   -9999.000000   -9999.000000       0.053900       0.399000
56172     56172     sichuan        102.2333       31.9000          112       129     2012      11        08        313              0.169042       5.743927       1.081020       0.283573       0.276000   -9999.000000       0.055200       0.123000
56172     56172     sichuan        102.2333       31.9000          112       129     2012      11        09        314              0.165625       5.227936       2.432652       0.283307       0.280000   -9999.000000       0.051600   -9999.000000
56172     56172     sichuan        102.2333       31.9000          112       129     2012      11        10        315              0.162542       4.107635       1.045126       0.268714   -9999.000000   -9999.000000       0.058100       0.197000
56172     56172     sichuan        102.2333       31.9000          112       129     2012      11        11        316              0.160208       3.857605       1.029296       0.251744   -9999.000000   -9999.000000   -9999.000000   -9999.000000
56172     56172     sichuan        102.2333       31.9000          112       129     2012      11        12        317              0.157167       3.444733       0.195931       0.251799   -9999.000000   -9999.000000   -9999.000000       0.256000
56172     56172     sichuan        102.2333       31.9000          112       129     2012      11        13        318              0.000000       3.542694       0.876721       0.246746       0.273000   -9999.000000       0.076400   -9999.000000
56172     56172     sichuan        102.2333       31.9000          112       129     2012      11        14        319              0.153000       3.003967       1.287531       0.236486       0.242000   -9999.000000       0.074600       0.232000
56172     56172     sichuan        102.2333       31.9000          112       129     2012      11        15        320              0.152125       2.785248       3.473877       0.238796       0.224000   -9999.000000       0.079900       0.210000
56172     56172     sichuan        102.2333       31.9000          112       129     2012      11        16        321              0.150750       3.225677       0.625683       0.262510   -9999.000000   -9999.000000       0.076700   -9999.000000
56172     56172     sichuan        102.2333       31.9000          112       129     2012      11        17        322              0.000000       2.740479       1.184309       0.245027   -9999.000000   -9999.000000   -9999.000000       0.239000
56172     56172     sichuan        102.2333       31.9000          112       129     2012      11        18        323              0.145667       1.659607       1.116863       0.215561   -9999.000000   -9999.000000   -9999.000000   -9999.000000
56172     56172     sichuan        102.2333       31.9000          112       129     2012      11        19        324              0.144917       1.841827       2.408462       0.221152       0.257000   -9999.000000       0.065500       0.295000
56172     56172     sichuan        102.2333       31.9000          112       129     2012      11        20        325              0.144458       2.642822       5.101707       0.235942       0.239000   -9999.000000       0.061600   -9999.000000
56172     56172     sichuan        102.2333       31.9000          112       129     2012      11        21        326              0.143708       2.953766       2.124084       0.252962   -9999.000000   -9999.000000       0.069800   -9999.000000
56172     56172     sichuan        102.2333       31.9000          112       129     2012      11        22        327              0.142667       2.934845       0.000000       0.256248   -9999.000000   -9999.000000       0.063600       0.220000
56172     56172     sichuan        102.2333       31.9000          112       129     2012      11        23        328              0.141958       2.235748       0.000000       0.242522   -9999.000000   -9999.000000   -9999.000000   -9999.000000
56172     56172     sichuan        102.2333       31.9000          112       129     2012      11        24        329              0.141542       2.635895       3.229177       0.238974       0.237000   -9999.000000       0.065100       0.371000
56172     56172     sichuan        102.2333       31.9000          112       129     2012      11        25        330              0.141417       3.483368       3.398401       0.257068   -9999.000000   -9999.000000       0.065300   -9999.000000
56172     56172     sichuan        102.2333       31.9000          112       129     2012      11        26        331              0.140667       1.432831       4.012300       0.242339   -9999.000000   -9999.000000       0.057700   -9999.000000
56172     56172     sichuan        102.2333       31.9000          112       129     2012      11        27        332              0.139667       0.575439       1.733998       0.197547   -9999.000000   -9999.000000       0.055700       0.074000
56172     56172     sichuan        102.2333       31.9000          112       129     2012      11        28        333              0.139333       0.650787       4.563543       0.192327   -9999.000000   -9999.000000   -9999.000000   -9999.000000
56172     56172     sichuan        102.2333       31.9000          112       129     2012      11        29        334              0.138083       1.055786       2.859606       0.206050       0.224000   -9999.000000   -9999.000000       0.079000
56172     56172     sichuan        102.2333       31.9000          112       129     2012      11        30        335              0.138667       0.923157       4.227733       0.209872       0.211000   -9999.000000       0.058500   -9999.000000
56172     56172     sichuan        102.2333       31.9000          112       129     2012      12        01        336              0.136667       1.591675       0.702208       0.227371   -9999.000000   -9999.000000       0.052300   -9999.000000
56172     56172     sichuan        102.2333       31.9000          112       129     2012      12        02        337              0.131375       0.263397       1.929298       0.196451   -9999.000000   -9999.000000       0.059100       0.052000
56172     56172     sichuan        102.2333       31.9000          112       129     2012      12        03        338              0.125458      -0.224518       3.197064       0.178208   -9999.000000   -9999.000000       0.050500   -9999.000000
56172     56172     sichuan        102.2333       31.9000          112       129     2012      12        04        339              0.119375       0.170349       1.313499       0.181723   -9999.000000   -9999.000000   -9999.000000       0.139000
56172     56172     sichuan        102.2333       31.9000          112       129     2012      12        05        340              0.114708      -0.958710       2.338781       0.161354       0.217000   -9999.000000   -9999.000000   -9999.000000
56172     56172     sichuan        102.2333       31.9000          112       129     2012      12        06        341              0.113667      -0.773163       6.091607       0.162652   -9999.000000   -9999.000000       0.053700       0.149000
56172     56172     sichuan        102.2333       31.9000          112       129     2012      12        07        342              0.103250      -0.687256       2.694605       0.172967   -9999.000000   -9999.000000       0.048700   -9999.000000
56172     56172     sichuan        102.2333       31.9000          112       129     2012      12        08        343              0.103875      -1.115326       2.464105       0.157902   -9999.000000   -9999.000000       0.052600   -9999.000000
56172     56172     sichuan        102.2333       31.9000          112       129     2012      12        09        344              0.109375      -1.234985       3.169136       0.157560   -9999.000000   -9999.000000   -9999.000000       0.009000
56172     56172     sichuan        102.2333       31.9000          112       129     2012      12        10        345              0.111792      -0.814606       1.419512       0.166002   -9999.000000   -9999.000000   -9999.000000   -9999.000000
56172     56172     sichuan        102.2333       31.9000          112       129     2012      12        11        346              0.105667      -1.356354       0.541753       0.157466   -9999.000000   -9999.000000       0.043100       0.046000
56172     56172     sichuan        102.2333       31.9000          112       129     2012      12        12        347              0.110792      -1.664581       5.164476       0.151833   -9999.000000   -9999.000000       0.045500   -9999.000000
56172     56172     sichuan        102.2333       31.9000          112       129     2012      12        13        348              0.117042      -0.836792       5.147820       0.167883   -9999.000000   -9999.000000       0.045200       0.004000
56172     56172     sichuan        102.2333       31.9000          112       129     2012      12        14        349              0.115000      -0.639923       7.319993       0.174685   -9999.000000   -9999.000000       0.042400       0.035000
56172     56172     sichuan        102.2333       31.9000          112       129     2012      12        15        350              0.000000      -1.570648       3.883451       0.153774   -9999.000000   -9999.000000   -9999.000000   -9999.000000
56172     56172     sichuan        102.2333       31.9000          112       129     2012      12        16        351              0.113125      -1.714233       3.738696       0.143729       0.179000   -9999.000000   -9999.000000       0.281000
56172     56172     sichuan        102.2333       31.9000          112       129     2012      12        17        352              0.121375      -0.889069       4.140521       0.155640   -9999.000000   -9999.000000       0.051600   -9999.000000
56172     56172     sichuan        102.2333       31.9000          112       129     2012      12        18        353              0.121957      -0.756500       2.660520       0.157253   -9999.000000   -9999.000000       0.048000       0.018000
56172     56172     sichuan        102.2333       31.9000          112       129     2012      12        19        354              0.118875      -0.831573       0.000000       0.158350   -9999.000000   -9999.000000       0.052700   -9999.000000
56172     56172     sichuan        102.2333       31.9000          112       129     2012      12        20        355              0.000000      -0.589233       2.231080       0.166338   -9999.000000   -9999.000000       0.048000   -9999.000000
56172     56172     sichuan        102.2333       31.9000          112       129     2012      12        21        356              0.122500      -0.439545       0.967111       0.168435       0.178000   -9999.000000   -9999.000000       0.109000
56172     56172     sichuan        102.2333       31.9000          112       129     2012      12        22        357              0.120125       0.380005       1.823281       0.188999   -9999.000000   -9999.000000       0.045800   -9999.000000
56172     56172     sichuan        102.2333       31.9000          112       129     2012      12        23        358              0.107208      -0.698578       0.600936       0.169320   -9999.000000   -9999.000000       0.052400       0.063000
56172     56172     sichuan        102.2333       31.9000          112       129     2012      12        24        359              0.087895      -2.193237       0.497787       0.146460   -9999.000000   -9999.000000       0.054800   -9999.000000
56172     56172     sichuan        102.2333       31.9000          112       129     2012      12        25        360              0.086833      -2.649658       0.000000       0.138823   -9999.000000   -9999.000000       0.054700   -9999.000000
56172     56172     sichuan        102.2333       31.9000          112       129     2012      12        26        361              0.000000      -1.791077       0.234944       0.144663   -9999.000000   -9999.000000   -9999.000000       0.009000
56172     56172     sichuan        102.2333       31.9000          112       129     2012      12        27        362              0.090417      -2.376282       0.000000       0.139883       0.177000   -9999.000000   -9999.000000   -9999.000000
56172     56172     sichuan        102.2333       31.9000          112       129     2012      12        28        363              0.106000      -2.164429       0.000000       0.141429   -9999.000000   -9999.000000       0.060800       0.101000
56172     56172     sichuan        102.2333       31.9000          112       129     2012      12        29        364              0.000000      -0.472168       0.000000       0.160792   -9999.000000   -9999.000000       0.056400   -9999.000000
56172     56172     sichuan        102.2333       31.9000          112       129     2012      12        30        365              0.000000      -4.109406       0.000000       0.108286   -9999.000000   -9999.000000       0.056900   -9999.000000
56172     56172     sichuan        102.2333       31.9000          112       129     2012      12        31        366              0.087067      -4.398041       0.000000       0.109819   -9999.000000   -9999.000000       0.040500   -9999.000000
