# Supplementary material for: Research on Fusing Multisatellite Soil Moisture Data Based on Bayesian Model Averaging
Source: Hindawi journal article supplement (doi:10.1155/2018/9310838), 2018-06-25
Supplement: f1 [file 9310838.f1.zip › 2012_sm00-10cm_daily_ZDB_ZHY_56180_366days_allin.txt]

56180     56180     sichuan        104.4167       32.1333          111       138     2012      01        01        001              0.000000   -9999.000000       0.549276   -9999.000000   -9999.000000   -9999.000000   -9999.000000   -9999.000000
56180     56180     sichuan        104.4167       32.1333          111       138     2012      01        02        002              0.092042       0.821259       0.424303       0.207371   -9999.000000   -9999.000000       0.042400   -9999.000000
56180     56180     sichuan        104.4167       32.1333          111       138     2012      01        03        003              0.000000       2.285278       0.453724       0.236306   -9999.000000   -9999.000000       0.052200       0.107000
56180     56180     sichuan        104.4167       32.1333          111       138     2012      01        04        004              0.091958       2.305420       0.234308       0.239794   -9999.000000   -9999.000000       0.045900       0.120000
56180     56180     sichuan        104.4167       32.1333          111       138     2012      01        05        005              0.092042       2.258484       0.233831       0.239390   -9999.000000   -9999.000000       0.047700   -9999.000000
56180     56180     sichuan        104.4167       32.1333          111       138     2012      01        06        006              0.092083       1.983582       0.443443       0.237714   -9999.000000   -9999.000000   -9999.000000       0.057000
56180     56180     sichuan        104.4167       32.1333          111       138     2012      01        07        007              0.092208       1.250305       0.416205       0.232641   -9999.000000   -9999.000000   -9999.000000   -9999.000000
56180     56180     sichuan        104.4167       32.1333          111       138     2012      01        08        008              0.000000       1.642303       1.044167       0.236899   -9999.000000   -9999.000000       0.048800       0.267000
56180     56180     sichuan        104.4167       32.1333          111       138     2012      01        09        009              0.091917       2.082367       1.125864       0.242725   -9999.000000   -9999.000000   -9999.000000   -9999.000000
56180     56180     sichuan        104.4167       32.1333          111       138     2012      01        10        010              0.091542       2.384369       0.675260       0.249350   -9999.000000   -9999.000000   -9999.000000       0.185000
56180     56180     sichuan        104.4167       32.1333          111       138     2012      01        11        011              0.091417       2.341797       1.206877       0.247782   -9999.000000   -9999.000000       0.039500       0.106000
56180     56180     sichuan        104.4167       32.1333          111       138     2012      01        12        012              0.090833       2.255554       0.223855       0.246113   -9999.000000   -9999.000000   -9999.000000   -9999.000000
56180     56180     sichuan        104.4167       32.1333          111       138     2012      01        13        013              0.091292       2.372375       0.507573       0.247369   -9999.000000   -9999.000000   -9999.000000       0.287000
56180     56180     sichuan        104.4167       32.1333          111       138     2012      01        14        014              0.091167       2.722321       0.190078       0.252532   -9999.000000   -9999.000000       0.043400   -9999.000000
56180     56180     sichuan        104.4167       32.1333          111       138     2012      01        15        015              0.091458       2.689636       0.000000       0.250077   -9999.000000   -9999.000000       0.036900       0.116000
56180     56180     sichuan        104.4167       32.1333          111       138     2012      01        16        016              0.090708       2.687531       0.508046       0.249671   -9999.000000   -9999.000000       0.038400       0.160000
56180     56180     sichuan        104.4167       32.1333          111       138     2012      01        17        017              0.000000       2.132507       0.174979       0.246034   -9999.000000   -9999.000000       0.031900   -9999.000000
56180     56180     sichuan        104.4167       32.1333          111       138     2012      01        18        018              0.090458       3.002991       0.647757       0.250957   -9999.000000   -9999.000000   -9999.000000       0.228000
56180     56180     sichuan        104.4167       32.1333          111       138     2012      01        19        019              0.090875       2.695282       0.991950       0.249178   -9999.000000   -9999.000000       0.030000   -9999.000000
56180     56180     sichuan        104.4167       32.1333          111       138     2012      01        20        020              0.090833       2.753632       2.003896       0.249059   -9999.000000   -9999.000000       0.035700       0.067000
56180     56180     sichuan        104.4167       32.1333          111       138     2012      01        21        021              0.090625       1.873566       2.584044       0.246600   -9999.000000   -9999.000000       0.035900   -9999.000000
56180     56180     sichuan        104.4167       32.1333          111       138     2012      01        22        022              0.090417       1.541107       0.491848       0.241957   -9999.000000   -9999.000000       0.034700   -9999.000000
56180     56180     sichuan        104.4167       32.1333          111       138     2012      01        23        023              0.090000       1.483673       0.988976       0.236250   -9999.000000   -9999.000000   -9999.000000       0.200000
56180     56180     sichuan        104.4167       32.1333          111       138     2012      01        24        024              0.089333       1.282806       0.330845       0.231019   -9999.000000   -9999.000000   -9999.000000   -9999.000000
56180     56180     sichuan        104.4167       32.1333          111       138     2012      01        25        025              0.090000       1.362030       0.000000       0.228658   -9999.000000   -9999.000000       0.032300       0.068000
56180     56180     sichuan        104.4167       32.1333          111       138     2012      01        26        026              0.090125       1.386017       0.000000       0.230458   -9999.000000   -9999.000000       0.036400   -9999.000000
56180     56180     sichuan        104.4167       32.1333          111       138     2012      01        27        027              0.089667       1.147614       0.000000       0.227748   -9999.000000   -9999.000000       0.035600   -9999.000000
56180     56180     sichuan        104.4167       32.1333          111       138     2012      01        28        028              0.090250       1.562836       0.000000       0.233986   -9999.000000   -9999.000000       0.033100       0.344000
56180     56180     sichuan        104.4167       32.1333          111       138     2012      01        29        029              0.090417       2.286346       0.157373       0.242668   -9999.000000   -9999.000000   -9999.000000   -9999.000000
56180     56180     sichuan        104.4167       32.1333          111       138     2012      01        30        030              0.090208       2.884125       0.000000       0.248390   -9999.000000   -9999.000000   -9999.000000       0.235000
56180     56180     sichuan        104.4167       32.1333          111       138     2012      01        31        031              0.090208       2.728821       0.000000       0.248778       0.100000   -9999.000000       0.048800   -9999.000000
56180     56180     sichuan        104.4167       32.1333          111       138     2012      02        01        032              0.089708       4.280853       0.235405       0.253551   -9999.000000   -9999.000000       0.045500       0.398000
56180     56180     sichuan        104.4167       32.1333          111       138     2012      02        02        033              0.090125       3.907135       0.476857       0.255776   -9999.000000   -9999.000000       0.051200       0.243000
56180     56180     sichuan        104.4167       32.1333          111       138     2012      02        03        034              0.089542       3.418671       0.000000       0.254301   -9999.000000   -9999.000000       0.046900   -9999.000000
56180     56180     sichuan        104.4167       32.1333          111       138     2012      02        04        035              0.089667       2.670685       0.000000       0.249833   -9999.000000   -9999.000000   -9999.000000       0.200000
56180     56180     sichuan        104.4167       32.1333          111       138     2012      02        05        036              0.089792       2.415039       0.000000       0.245911   -9999.000000   -9999.000000       0.042800   -9999.000000
56180     56180     sichuan        104.4167       32.1333          111       138     2012      02        06        037              0.089667       3.560242       0.000000       0.251841   -9999.000000   -9999.000000       0.037400       0.379000
56180     56180     sichuan        104.4167       32.1333          111       138     2012      02        07        038              0.089375       4.109741       0.000000       0.255599   -9999.000000   -9999.000000       0.028600   -9999.000000
56180     56180     sichuan        104.4167       32.1333          111       138     2012      02        08        039              0.088316       4.119232       0.495897       0.253698   -9999.000000   -9999.000000       0.035500       0.169000
56180     56180     sichuan        104.4167       32.1333          111       138     2012      02        09        040              0.000000       3.088226       0.743488       0.247730   -9999.000000   -9999.000000   -9999.000000       0.148000
56180     56180     sichuan        104.4167       32.1333          111       138     2012      02        10        041              0.089957       2.302155       1.170690       0.243919   -9999.000000   -9999.000000   -9999.000000   -9999.000000
56180     56180     sichuan        104.4167       32.1333          111       138     2012      02        11        042              0.091458       1.919159       0.156781       0.237795   -9999.000000   -9999.000000       0.037200       0.301000
56180     56180     sichuan        104.4167       32.1333          111       138     2012      02        12        043              0.091833       2.303131       3.855005       0.241548   -9999.000000   -9999.000000       0.035400   -9999.000000
56180     56180     sichuan        104.4167       32.1333          111       138     2012      02        13        044              0.091625       2.883575       0.000000       0.247888   -9999.000000   -9999.000000       0.034000       0.193000
56180     56180     sichuan        104.4167       32.1333          111       138     2012      02        14        045              0.091375       2.569305       0.000000       0.246535   -9999.000000   -9999.000000   -9999.000000       0.263000
56180     56180     sichuan        104.4167       32.1333          111       138     2012      02        15        046              0.091826       2.816437       0.572643       0.247712   -9999.000000   -9999.000000   -9999.000000   -9999.000000
56180     56180     sichuan        104.4167       32.1333          111       138     2012      02        16        047              0.091250       3.787903       1.130523       0.253031   -9999.000000   -9999.000000   -9999.000000       0.370000
56180     56180     sichuan        104.4167       32.1333          111       138     2012      02        17        048              0.091625       3.228088       0.000000       0.252465   -9999.000000   -9999.000000       0.031600   -9999.000000
56180     56180     sichuan        104.4167       32.1333          111       138     2012      02        18        049              0.091792       3.216583       0.270811       0.248806   -9999.000000   -9999.000000       0.026700       0.211000
56180     56180     sichuan        104.4167       32.1333          111       138     2012      02        19        050              0.091292       3.048645       0.217045       0.248814   -9999.000000   -9999.000000       0.036000   -9999.000000
56180     56180     sichuan        104.4167       32.1333          111       138     2012      02        20        051              0.090625       2.581299       0.568052       0.247587   -9999.000000   -9999.000000       0.028300   -9999.000000
56180     56180     sichuan        104.4167       32.1333          111       138     2012      02        21        052              0.091130       2.536469       0.626088       0.247682   -9999.000000   -9999.000000   -9999.000000       0.511000
56180     56180     sichuan        104.4167       32.1333          111       138     2012      02        22        053              0.091391       3.563324       0.246944       0.255212       0.057000   -9999.000000       0.021500   -9999.000000
56180     56180     sichuan        104.4167       32.1333          111       138     2012      02        23        054              0.091217       4.734222       0.273031       0.258704   -9999.000000   -9999.000000       0.031900       0.422000
56180     56180     sichuan        104.4167       32.1333          111       138     2012      02        24        055              0.090375       5.234344       0.406207       0.261054   -9999.000000   -9999.000000       0.029900   -9999.000000
56180     56180     sichuan        104.4167       32.1333          111       138     2012      02        25        056              0.089583       4.073730       0.226390       0.261382   -9999.000000   -9999.000000       0.027000   -9999.000000
56180     56180     sichuan        104.4167       32.1333          111       138     2012      02        26        057              0.090000       3.775055       0.383832       0.257534   -9999.000000   -9999.000000   -9999.000000       0.475000
56180     56180     sichuan        104.4167       32.1333          111       138     2012      02        27        058              0.090318       4.137909       0.630655       0.255981   -9999.000000   -9999.000000   -9999.000000   -9999.000000
56180     56180     sichuan        104.4167       32.1333          111       138     2012      02        28        059              0.089478       3.964417       0.234847       0.258510   -9999.000000   -9999.000000   -9999.000000       0.359000
56180     56180     sichuan        104.4167       32.1333          111       138     2012      02        29        060              0.000000   -9999.000000       1.867485   -9999.000000   -9999.000000   -9999.000000   -9999.000000   -9999.000000
56180     56180     sichuan        104.4167       32.1333          111       138     2012      03        01        061              0.091913       3.101318       4.100891       0.257699   -9999.000000   -9999.000000       0.028800       0.441000
56180     56180     sichuan        104.4167       32.1333          111       138     2012      03        02        062              0.090875       5.095978       2.310150       0.268341   -9999.000000   -9999.000000       0.024600       0.537000
56180     56180     sichuan        104.4167       32.1333          111       138     2012      03        03        063              0.091042       4.624359       1.264511       0.276955   -9999.000000   -9999.000000   -9999.000000   -9999.000000
56180     56180     sichuan        104.4167       32.1333          111       138     2012      03        04        064              0.090167       4.720459       0.252525       0.277174   -9999.000000   -9999.000000   -9999.000000       0.532000
56180     56180     sichuan        104.4167       32.1333          111       138     2012      03        05        065              0.090083       4.655640       0.107365       0.272594   -9999.000000   -9999.000000       0.027500   -9999.000000
56180     56180     sichuan        104.4167       32.1333          111       138     2012      03        06        066              0.089292       4.536957       0.153233       0.269762   -9999.000000   -9999.000000       0.022600       0.613000
56180     56180     sichuan        104.4167       32.1333          111       138     2012      03        07        067              0.000000       5.659698       3.702492       0.268118   -9999.000000   -9999.000000       0.023300   -9999.000000
56180     56180     sichuan        104.4167       32.1333          111       138     2012      03        08        068              0.089542       4.731537       4.271019       0.272202   -9999.000000   -9999.000000       0.021800       0.449000
56180     56180     sichuan        104.4167       32.1333          111       138     2012      03        09        069              0.092042       4.070923       1.411976       0.281535   -9999.000000   -9999.000000   -9999.000000       0.521000
56180     56180     sichuan        104.4167       32.1333          111       138     2012      03        10        070              0.092125       4.721497       1.519027       0.278316   -9999.000000   -9999.000000       0.017700   -9999.000000
56180     56180     sichuan        104.4167       32.1333          111       138     2012      03        11        071              0.091458       6.546387       0.471864       0.274379   -9999.000000   -9999.000000       0.027100       0.677000
56180     56180     sichuan        104.4167       32.1333          111       138     2012      03        12        072              0.090708       7.070953       1.571759       0.271764   -9999.000000   -9999.000000       0.043600   -9999.000000
56180     56180     sichuan        104.4167       32.1333          111       138     2012      03        13        073              0.092375       6.433655       0.359641       0.270027       0.071000   -9999.000000       0.047600       0.420000
56180     56180     sichuan        104.4167       32.1333          111       138     2012      03        14        074              0.091958      10.341858       2.727202       0.267698       0.066000   -9999.000000   -9999.000000       0.449000
56180     56180     sichuan        104.4167       32.1333          111       138     2012      03        15        075              0.097417       7.547577       2.876067       0.275662       0.071000   -9999.000000   -9999.000000   -9999.000000
56180     56180     sichuan        104.4167       32.1333          111       138     2012      03        16        076              0.096000       8.052399       1.798234       0.280044   -9999.000000   -9999.000000       0.047800       0.658000
56180     56180     sichuan        104.4167       32.1333          111       138     2012      03        17        077              0.000000       9.032074       1.188746       0.277924   -9999.000000   -9999.000000       0.041800   -9999.000000
56180     56180     sichuan        104.4167       32.1333          111       138     2012      03        18        078              0.000000      12.742950       1.027579       0.268829       0.065500   -9999.000000       0.051200       0.552000
56180     56180     sichuan        104.4167       32.1333          111       138     2012      03        19        079              0.000000      12.605103       1.658248       0.265259       0.068500   -9999.000000       0.046200   -9999.000000
56180     56180     sichuan        104.4167       32.1333          111       138     2012      03        20        080              0.000000      14.668243       0.364072       0.260259       0.070000   -9999.000000   -9999.000000   -9999.000000
56180     56180     sichuan        104.4167       32.1333          111       138     2012      03        21        081              0.000000      12.740631       0.969807       0.260781   -9999.000000   -9999.000000   -9999.000000       0.706000
56180     56180     sichuan        104.4167       32.1333          111       138     2012      03        22        082              0.000000      11.114380       1.723041       0.265047   -9999.000000   -9999.000000       0.046600   -9999.000000
56180     56180     sichuan        104.4167       32.1333          111       138     2012      03        23        083              0.000000       8.541229       1.385435       0.270938   -9999.000000   -9999.000000       0.043600       0.395000
56180     56180     sichuan        104.4167       32.1333          111       138     2012      03        24        084              0.000000       8.179688       0.677610       0.269055       0.087000   -9999.000000       0.048100   -9999.000000
56180     56180     sichuan        104.4167       32.1333          111       138     2012      03        25        085              0.000000      11.720428       0.588606       0.261744       0.089000   -9999.000000       0.045000   -9999.000000
56180     56180     sichuan        104.4167       32.1333          111       138     2012      03        26        086              0.097000      12.565216       1.020517       0.257676       0.092000   -9999.000000   -9999.000000       0.666000
56180     56180     sichuan        104.4167       32.1333          111       138     2012      03        27        087              0.101500      13.936890       4.224083       0.254175   -9999.000000   -9999.000000       0.053300   -9999.000000
56180     56180     sichuan        104.4167       32.1333          111       138     2012      03        28        088              0.095000      13.141754      10.035715       0.259738   -9999.000000   -9999.000000       0.056700       0.524000
56180     56180     sichuan        104.4167       32.1333          111       138     2012      03        29        089              0.097462      12.360382       0.278680       0.290383       0.088500   -9999.000000       0.052500   -9999.000000
56180     56180     sichuan        104.4167       32.1333          111       138     2012      03        30        090              0.103208      11.482147       2.443678       0.287640   -9999.000000   -9999.000000       0.050300       0.649000
56180     56180     sichuan        104.4167       32.1333          111       138     2012      03        31        091              0.108292      10.674805       0.188721       0.283921       0.099000   -9999.000000   -9999.000000       0.605000
56180     56180     sichuan        104.4167       32.1333          111       138     2012      04        01        092              0.105958      13.153351       0.501810       0.272934   -9999.000000   -9999.000000   -9999.000000   -9999.000000
56180     56180     sichuan        104.4167       32.1333          111       138     2012      04        02        093              0.104042      14.556702       2.403764       0.265147       0.098000   -9999.000000       0.066100       0.574000
56180     56180     sichuan        104.4167       32.1333          111       138     2012      04        03        094              0.099750      15.813690       0.153009       0.258640       0.089500   -9999.000000       0.056500   -9999.000000
56180     56180     sichuan        104.4167       32.1333          111       138     2012      04        04        095              0.098417      15.564362       0.347013       0.253188       0.090000   -9999.000000       0.064600       0.664000
56180     56180     sichuan        104.4167       32.1333          111       138     2012      04        05        096              0.100042      16.751007       0.810950       0.248543   -9999.000000   -9999.000000       0.063500   -9999.000000
56180     56180     sichuan        104.4167       32.1333          111       138     2012      04        06        097              0.099625      13.913574       0.148468       0.254223   -9999.000000   -9999.000000   -9999.000000       0.466000
56180     56180     sichuan        104.4167       32.1333          111       138     2012      04        07        098              0.098958      13.017090       0.160556       0.253416       0.093000   -9999.000000   -9999.000000       0.501000
56180     56180     sichuan        104.4167       32.1333          111       138     2012      04        08        099              0.099708      13.179718       0.881152       0.252386       0.092500   -9999.000000       0.065400   -9999.000000
56180     56180     sichuan        104.4167       32.1333          111       138     2012      04        09        100              0.099167      12.349518       0.846657       0.252340       0.092500   -9999.000000       0.063900       0.634000
56180     56180     sichuan        104.4167       32.1333          111       138     2012      04        10        101              0.098833      13.079468       0.983891       0.252759       0.097000   -9999.000000       0.071800   -9999.000000
56180     56180     sichuan        104.4167       32.1333          111       138     2012      04        11        102              0.098042      17.047211       9.228123       0.246340   -9999.000000   -9999.000000   -9999.000000       0.509000
56180     56180     sichuan        104.4167       32.1333          111       138     2012      04        12        103              0.097000      17.140350       1.463093       0.257891       0.098000   -9999.000000   -9999.000000       0.456000
56180     56180     sichuan        104.4167       32.1333          111       138     2012      04        13        104              0.127625      12.858124       1.080135       0.281463       0.091500   -9999.000000       0.073300   -9999.000000
56180     56180     sichuan        104.4167       32.1333          111       138     2012      04        14        105              0.132167      13.990631       0.230371       0.269565       0.088000   -9999.000000       0.072400       0.675000
56180     56180     sichuan        104.4167       32.1333          111       138     2012      04        15        106              0.133917      13.874329       1.268110       0.264940       0.095000   -9999.000000       0.071600   -9999.000000
56180     56180     sichuan        104.4167       32.1333          111       138     2012      04        16        107              0.135000      14.411377       2.018926       0.263817       0.104000   -9999.000000       0.066100       0.682000
56180     56180     sichuan        104.4167       32.1333          111       138     2012      04        17        108              0.138292      12.291870       0.000000       0.273168   -9999.000000   -9999.000000   -9999.000000   -9999.000000
56180     56180     sichuan        104.4167       32.1333          111       138     2012      04        18        109              0.142792      13.265747       0.000000       0.265323       0.095000   -9999.000000   -9999.000000   -9999.000000
56180     56180     sichuan        104.4167       32.1333          111       138     2012      04        19        110              0.134208      15.473999       0.564502       0.259510       0.099000   -9999.000000       0.068500       0.805000
56180     56180     sichuan        104.4167       32.1333          111       138     2012      04        20        111              0.129625      15.122314       1.558991       0.259145       0.096500   -9999.000000       0.062100   -9999.000000
56180     56180     sichuan        104.4167       32.1333          111       138     2012      04        21        112              0.127250      16.481201       0.302682       0.260245       0.143000   -9999.000000       0.065800       0.585000
56180     56180     sichuan        104.4167       32.1333          111       138     2012      04        22        113              0.123917      18.187683       0.156299       0.252335   -9999.000000   -9999.000000   -9999.000000   -9999.000000
56180     56180     sichuan        104.4167       32.1333          111       138     2012      04        23        114              0.124958      19.554169       7.897120       0.245978       0.123000   -9999.000000   -9999.000000   -9999.000000
56180     56180     sichuan        104.4167       32.1333          111       138     2012      04        24        115              0.157000      18.762695       2.364356       0.264567       0.121000   -9999.000000       0.093800       0.759000
56180     56180     sichuan        104.4167       32.1333          111       138     2012      04        25        116              0.000000      18.666931       0.574740       0.270526       0.131000   -9999.000000       0.097600   -9999.000000
56180     56180     sichuan        104.4167       32.1333          111       138     2012      04        26        117              0.150458      17.615936       0.382275       0.258319       0.145000   -9999.000000       0.088000       0.576000
56180     56180     sichuan        104.4167       32.1333          111       138     2012      04        27        118              0.141417      18.528503       2.730517       0.250434   -9999.000000   -9999.000000       0.091200   -9999.000000
56180     56180     sichuan        104.4167       32.1333          111       138     2012      04        28        119              0.135292      18.938324       2.477295       0.255244       0.118000   -9999.000000   -9999.000000       0.672000
56180     56180     sichuan        104.4167       32.1333          111       138     2012      04        29        120              0.126500      19.726654       0.000000       0.256784       0.116500   -9999.000000   -9999.000000       0.717000
56180     56180     sichuan        104.4167       32.1333          111       138     2012      04        30        121              0.136167      18.243195      18.508350       0.252448       0.126000   -9999.000000       0.077100   -9999.000000
56180     56180     sichuan        104.4167       32.1333          111       138     2012      05        01        122              0.214833      19.059357       2.607817       0.289803       0.166000   -9999.000000       0.079200       0.620000
56180     56180     sichuan        104.4167       32.1333          111       138     2012      05        02        123              0.185542      18.108826       3.757650       0.289817       0.170000   -9999.000000       0.079800   -9999.000000
56180     56180     sichuan        104.4167       32.1333          111       138     2012      05        03        124              0.178792      16.266449       3.821678       0.286498       0.158000   -9999.000000       0.077800       0.886000
56180     56180     sichuan        104.4167       32.1333          111       138     2012      05        04        125              0.172792      16.970062       1.611144       0.289204       0.143000   -9999.000000   -9999.000000   -9999.000000
56180     56180     sichuan        104.4167       32.1333          111       138     2012      05        05        126              0.156042      17.933929       1.695923       0.286784       0.149500   -9999.000000   -9999.000000       0.794000
56180     56180     sichuan        104.4167       32.1333          111       138     2012      05        06        127              0.149458      16.981110       1.172172       0.281037       0.151500   -9999.000000       0.078100       0.781000
56180     56180     sichuan        104.4167       32.1333          111       138     2012      05        07        128              0.142833      17.205688       4.027500       0.281702   -9999.000000   -9999.000000       0.133100   -9999.000000
56180     56180     sichuan        104.4167       32.1333          111       138     2012      05        08        129              0.142375      20.543854      14.965046       0.281818   -9999.000000   -9999.000000       0.120000       0.931000
56180     56180     sichuan        104.4167       32.1333          111       138     2012      05        09        130              0.144833      19.965363       0.217804       0.304260   -9999.000000   -9999.000000       0.123400   -9999.000000
56180     56180     sichuan        104.4167       32.1333          111       138     2012      05        10        131              0.134458      21.692444       1.874239       0.291925       0.136000   -9999.000000   -9999.000000       0.758000
56180     56180     sichuan        104.4167       32.1333          111       138     2012      05        11        132              0.135958      20.748016       7.354555       0.285388       0.131000   -9999.000000       0.135400       0.758000
56180     56180     sichuan        104.4167       32.1333          111       138     2012      05        12        133              0.156917      20.196991       0.000000       0.296000       0.148000   -9999.000000       0.133300   -9999.000000
56180     56180     sichuan        104.4167       32.1333          111       138     2012      05        13        134              0.156417      19.346832       3.398793       0.284279   -9999.000000   -9999.000000       0.128700       0.800000
56180     56180     sichuan        104.4167       32.1333          111       138     2012      05        14        135              0.153000      15.835632       0.068841       0.286824       0.117000   -9999.000000       0.154800   -9999.000000
56180     56180     sichuan        104.4167       32.1333          111       138     2012      05        15        136              0.139125      17.845642       0.150709       0.276313       0.121000   -9999.000000   -9999.000000       0.567000
56180     56180     sichuan        104.4167       32.1333          111       138     2012      05        16        137              0.131125      19.097931       0.141504       0.267588       0.126500   -9999.000000   -9999.000000   -9999.000000
56180     56180     sichuan        104.4167       32.1333          111       138     2012      05        17        138              0.128542      18.834167       0.044849       0.263211       0.124000   -9999.000000       0.154800   -9999.000000
56180     56180     sichuan        104.4167       32.1333          111       138     2012      05        18        139              0.123958      19.603180       0.157490       0.257397   -9999.000000   -9999.000000       0.151600       0.797000
56180     56180     sichuan        104.4167       32.1333          111       138     2012      05        19        140              0.123500      20.932373       0.525739       0.252736       0.120000   -9999.000000       0.151400   -9999.000000
56180     56180     sichuan        104.4167       32.1333          111       138     2012      05        20        141              0.117208      22.511017       5.848481       0.248852       0.118000   -9999.000000       0.166200       0.755000
56180     56180     sichuan        104.4167       32.1333          111       138     2012      05        21        142              0.114000      19.817505      12.656777       0.263784       0.188000   -9999.000000   -9999.000000   -9999.000000
56180     56180     sichuan        104.4167       32.1333          111       138     2012      05        22        143              0.112375      18.258331       3.229434       0.299687       0.215500   -9999.000000   -9999.000000   -9999.000000
56180     56180     sichuan        104.4167       32.1333          111       138     2012      05        23        144              0.113792      17.644714      11.839869       0.292514   -9999.000000   -9999.000000       0.185400       0.977000
56180     56180     sichuan        104.4167       32.1333          111       138     2012      05        24        145              0.110042      17.558044       5.669341       0.300259   -9999.000000   -9999.000000       0.179300   -9999.000000
56180     56180     sichuan        104.4167       32.1333          111       138     2012      05        25        146              0.000000      16.639648       0.203895       0.307194       0.163000   -9999.000000       0.183700       0.673000
56180     56180     sichuan        104.4167       32.1333          111       138     2012      05        26        147              0.113542      17.335083       1.026857       0.293658       0.168500   -9999.000000       0.177400   -9999.000000
56180     56180     sichuan        104.4167       32.1333          111       138     2012      05        27        148              0.111583      19.753723       3.497204       0.282954       0.180000   -9999.000000   -9999.000000       0.774000
56180     56180     sichuan        104.4167       32.1333          111       138     2012      05        28        149              0.106750      18.649658       8.125170       0.283233       0.190000   -9999.000000   -9999.000000       1.000000
56180     56180     sichuan        104.4167       32.1333          111       138     2012      05        29        150              0.111917      18.063049       0.000000       0.300729   -9999.000000   -9999.000000       0.174400   -9999.000000
56180     56180     sichuan        104.4167       32.1333          111       138     2012      05        30        151              0.109042      20.486267       5.640362       0.286234   -9999.000000   -9999.000000       0.185600   -9999.000000
56180     56180     sichuan        104.4167       32.1333          111       138     2012      05        31        152              0.100375      19.878204       5.946218       0.282401       0.172500   -9999.000000       0.177300   -9999.000000
56180     56180     sichuan        104.4167       32.1333          111       138     2012      06        01        153              0.108583      17.287567       0.000000       0.302534       0.157000   -9999.000000   -9999.000000       0.765000
56180     56180     sichuan        104.4167       32.1333          111       138     2012      06        02        154              0.108333      19.914215       7.036010       0.283122   -9999.000000   -9999.000000   -9999.000000   -9999.000000
56180     56180     sichuan        104.4167       32.1333          111       138     2012      06        03        155              0.176208      17.821808       1.011660       0.294589   -9999.000000   -9999.000000   -9999.000000       0.891000
56180     56180     sichuan        104.4167       32.1333          111       138     2012      06        04        156              0.182708      17.784637       0.942514       0.289548       0.179000   -9999.000000       0.150400       0.702000
56180     56180     sichuan        104.4167       32.1333          111       138     2012      06        05        157              0.165083      17.370819       3.147679       0.283543       0.164000   -9999.000000       0.151400   -9999.000000
56180     56180     sichuan        104.4167       32.1333          111       138     2012      06        06        158              0.177708      18.058380       3.844292       0.283093       0.165000   -9999.000000       0.146300       0.834000
56180     56180     sichuan        104.4167       32.1333          111       138     2012      06        07        159              0.164958      19.013275       1.105655       0.291615       0.169000   -9999.000000   -9999.000000   -9999.000000
56180     56180     sichuan        104.4167       32.1333          111       138     2012      06        08        160              0.146667      21.100006       1.447952       0.280722   -9999.000000   -9999.000000   -9999.000000       0.644000
56180     56180     sichuan        104.4167       32.1333          111       138     2012      06        09        161              0.160667      19.319550       2.707562       0.282092   -9999.000000   -9999.000000       0.143200       0.718000
56180     56180     sichuan        104.4167       32.1333          111       138     2012      06        10        162              0.188583      21.694824       1.017845       0.276806       0.152000   -9999.000000       0.138400   -9999.000000
56180     56180     sichuan        104.4167       32.1333          111       138     2012      06        11        163              0.000000      21.347168       0.927398       0.274500       0.139000   -9999.000000       0.246700       0.807000
56180     56180     sichuan        104.4167       32.1333          111       138     2012      06        12        164              0.149833      20.085968       2.981302       0.270032       0.136000   -9999.000000       0.237800   -9999.000000
56180     56180     sichuan        104.4167       32.1333          111       138     2012      06        13        165              0.152625      20.882996       4.856259       0.264170       0.140000   -9999.000000   -9999.000000       0.847000
56180     56180     sichuan        104.4167       32.1333          111       138     2012      06        14        166              0.151167      20.949249       0.727606       0.275288   -9999.000000   -9999.000000       0.243300   -9999.000000
56180     56180     sichuan        104.4167       32.1333          111       138     2012      06        15        167              0.143292      21.691315       5.124482       0.269660       0.135000   -9999.000000       0.251900   -9999.000000
56180     56180     sichuan        104.4167       32.1333          111       138     2012      06        16        168              0.178333      19.375763       1.544656       0.280390       0.149000   -9999.000000       0.251300       1.000000
56180     56180     sichuan        104.4167       32.1333          111       138     2012      06        17        169              0.170542      18.877136       1.865120       0.278205       0.141500   -9999.000000       0.266000   -9999.000000
56180     56180     sichuan        104.4167       32.1333          111       138     2012      06        18        170              0.148375      19.703217       0.270945       0.270599       0.159000   -9999.000000   -9999.000000       0.740000
56180     56180     sichuan        104.4167       32.1333          111       138     2012      06        19        171              0.139292      20.703125       0.246500       0.266166   -9999.000000   -9999.000000   -9999.000000   -9999.000000
56180     56180     sichuan        104.4167       32.1333          111       138     2012      06        20        172              0.132750      21.250641       3.862204       0.261134       0.135000   -9999.000000       0.212500   -9999.000000
56180     56180     sichuan        104.4167       32.1333          111       138     2012      06        21        173              0.127542      21.104462       0.472461       0.260548       0.171500   -9999.000000       0.216000       0.860000
56180     56180     sichuan        104.4167       32.1333          111       138     2012      06        22        174              0.124417      21.498962       5.410741       0.264052       0.163000   -9999.000000       0.209700   -9999.000000
56180     56180     sichuan        104.4167       32.1333          111       138     2012      06        23        175              0.120875      22.484192       0.000000       0.256115       0.156000   -9999.000000       0.209500       0.680000
56180     56180     sichuan        104.4167       32.1333          111       138     2012      06        24        176              0.118583      23.070648       3.094905       0.250145   -9999.000000   -9999.000000   -9999.000000   -9999.000000
56180     56180     sichuan        104.4167       32.1333          111       138     2012      06        25        177              0.124792      21.560120       3.262758       0.259221       0.191000   -9999.000000   -9999.000000       0.842000
56180     56180     sichuan        104.4167       32.1333          111       138     2012      06        26        178              0.126625      21.122498      39.490387       0.267023       0.202000   -9999.000000       0.128900       1.000000
56180     56180     sichuan        104.4167       32.1333          111       138     2012      06        27        179              0.125917      20.671143      11.662914       0.314110       0.210000   -9999.000000       0.121500   -9999.000000
56180     56180     sichuan        104.4167       32.1333          111       138     2012      06        28        180              0.122917      20.687714       5.626861       0.324085       0.220000   -9999.000000       0.124500       1.000000
56180     56180     sichuan        104.4167       32.1333          111       138     2012      06        29        181              0.119958      20.833374       9.726015       0.314388       0.209000   -9999.000000       0.115300   -9999.000000
56180     56180     sichuan        104.4167       32.1333          111       138     2012      06        30        182              0.116125      21.153656       4.150032       0.317132       0.176000   -9999.000000   -9999.000000   -9999.000000
56180     56180     sichuan        104.4167       32.1333          111       138     2012      07        01        183              0.119000      20.952301      11.320917       0.305184   -9999.000000   -9999.000000       0.111300   -9999.000000
56180     56180     sichuan        104.4167       32.1333          111       138     2012      07        02        184              0.170458      21.553894      16.941845       0.304455       0.147500   -9999.000000       0.235400       0.993000
56180     56180     sichuan        104.4167       32.1333          111       138     2012      07        03        185              0.160000      21.876709      18.497524       0.326800       0.141000   -9999.000000       0.238100       0.947000
56180     56180     sichuan        104.4167       32.1333          111       138     2012      07        04        186              0.171625      23.269775       0.330165       0.321084       0.150000   -9999.000000       0.221800   -9999.000000
56180     56180     sichuan        104.4167       32.1333          111       138     2012      07        05        187              0.141917      23.425537       1.037681       0.305692   -9999.000000   -9999.000000   -9999.000000       0.885000
56180     56180     sichuan        104.4167       32.1333          111       138     2012      07        06        188              0.149833      23.753571      10.882869       0.292672   -9999.000000   -9999.000000   -9999.000000   -9999.000000
56180     56180     sichuan        104.4167       32.1333          111       138     2012      07        07        189              0.158417      22.120148       0.547527       0.306001   -9999.000000   -9999.000000       0.237200       0.720000
56180     56180     sichuan        104.4167       32.1333          111       138     2012      07        08        190              0.157042      22.386017       9.244143       0.297789       0.149000   -9999.000000       0.242000       0.963000
56180     56180     sichuan        104.4167       32.1333          111       138     2012      07        09        191              0.188292      23.019501       6.182240       0.303111       0.171000   -9999.000000       0.266800   -9999.000000
56180     56180     sichuan        104.4167       32.1333          111       138     2012      07        10        192              0.178458      22.492371       0.000000       0.307466   -9999.000000   -9999.000000       0.235200       0.855000
56180     56180     sichuan        104.4167       32.1333          111       138     2012      07        11        193              0.165167      24.909241       0.200365       0.292756       0.208000   -9999.000000   -9999.000000   -9999.000000
56180     56180     sichuan        104.4167       32.1333          111       138     2012      07        12        194              0.162167      22.825073       0.030678       0.286353       0.190000   -9999.000000       0.247000       0.744000
56180     56180     sichuan        104.4167       32.1333          111       138     2012      07        13        195              0.159375      21.926178       0.000000       0.281733       0.187000   -9999.000000       0.244900   -9999.000000
56180     56180     sichuan        104.4167       32.1333          111       138     2012      07        14        196              0.166917      24.472260       9.223642       0.274793   -9999.000000   -9999.000000       0.246300   -9999.000000
56180     56180     sichuan        104.4167       32.1333          111       138     2012      07        15        197              0.173833      22.424561       0.000000       0.296081       0.222000   -9999.000000       0.248100       0.814000
56180     56180     sichuan        104.4167       32.1333          111       138     2012      07        16        198              0.167083      22.928680       1.716819       0.286098       0.223000   -9999.000000   -9999.000000   -9999.000000
56180     56180     sichuan        104.4167       32.1333          111       138     2012      07        17        199              0.180083      21.493835      29.226315       0.284809       0.207000   -9999.000000   -9999.000000       1.000000
56180     56180     sichuan        104.4167       32.1333          111       138     2012      07        18        200              0.175870      20.440247       1.537542       0.332733       0.238000   -9999.000000       0.097700   -9999.000000
56180     56180     sichuan        104.4167       32.1333          111       138     2012      07        19        201              0.180625      21.219452       3.386817       0.304562       0.249000   -9999.000000       0.096300   -9999.000000
56180     56180     sichuan        104.4167       32.1333          111       138     2012      07        20        202              0.174167      21.108887       4.893422       0.303637       0.275000   -9999.000000       0.099600       1.000000
56180     56180     sichuan        104.4167       32.1333          111       138     2012      07        21        203              0.202087      21.334381      20.840250       0.298617   -9999.000000   -9999.000000       0.092000   -9999.000000
56180     56180     sichuan        104.4167       32.1333          111       138     2012      07        22        204              0.199292      21.236786       0.225478       0.328262       0.274000   -9999.000000   -9999.000000       0.843000
56180     56180     sichuan        104.4167       32.1333          111       138     2012      07        23        205              0.184208      21.870667       5.092679       0.303963       0.295000   -9999.000000   -9999.000000   -9999.000000
56180     56180     sichuan        104.4167       32.1333          111       138     2012      07        24        206              0.167708      20.732544       0.134172       0.305263       0.279500   -9999.000000       0.058800       0.974000
56180     56180     sichuan        104.4167       32.1333          111       138     2012      07        25        207              0.148542      22.007599       1.753554       0.293468       0.276000   -9999.000000       0.059700       0.838000
56180     56180     sichuan        104.4167       32.1333          111       138     2012      07        26        208              0.139333      23.988251       4.032074       0.288981   -9999.000000   -9999.000000       0.062100   -9999.000000
56180     56180     sichuan        104.4167       32.1333          111       138     2012      07        27        209              0.137750      23.663879       3.825007       0.292653       0.297000   -9999.000000       0.060400       0.976000
56180     56180     sichuan        104.4167       32.1333          111       138     2012      07        28        210              0.136292      22.921783       1.077117       0.299205       0.254000   -9999.000000   -9999.000000   -9999.000000
56180     56180     sichuan        104.4167       32.1333          111       138     2012      07        29        211              0.131500      24.967224       7.637314       0.288373       0.241500   -9999.000000       0.059900       0.914000
56180     56180     sichuan        104.4167       32.1333          111       138     2012      07        30        212              0.126333      24.684540      15.199188       0.283388       0.295000   -9999.000000       0.143500   -9999.000000
56180     56180     sichuan        104.4167       32.1333          111       138     2012      07        31        213              0.123042      23.968109       0.478725       0.301110       0.316000   -9999.000000       0.133800       0.838000
56180     56180     sichuan        104.4167       32.1333          111       138     2012      08        01        214              0.123625      22.267609       4.330225       0.302789   -9999.000000   -9999.000000       0.131000       0.732000
56180     56180     sichuan        104.4167       32.1333          111       138     2012      08        02        215              0.123875      22.227814       1.429161       0.296541       0.248000   -9999.000000   -9999.000000   -9999.000000
56180     56180     sichuan        104.4167       32.1333          111       138     2012      08        03        216              0.121125      24.235931       2.766222       0.293855       0.218000   -9999.000000   -9999.000000       0.911000
56180     56180     sichuan        104.4167       32.1333          111       138     2012      08        04        217              0.117917      24.339325       0.444925       0.291595       0.231500   -9999.000000       0.134600   -9999.000000
56180     56180     sichuan        104.4167       32.1333          111       138     2012      08        05        218              0.179417      24.033386       6.366095       0.285127   -9999.000000   -9999.000000       0.136000       0.721000
56180     56180     sichuan        104.4167       32.1333          111       138     2012      08        06        219              0.162125      23.056061       9.724742       0.299733   -9999.000000   -9999.000000       0.150400       0.986000
56180     56180     sichuan        104.4167       32.1333          111       138     2012      08        07        220              0.139667      23.588196       0.242555       0.304451       0.227000   -9999.000000       0.149500   -9999.000000
56180     56180     sichuan        104.4167       32.1333          111       138     2012      08        08        221              0.126750      24.082825       0.000000       0.296423       0.216500   -9999.000000   -9999.000000       0.882000
56180     56180     sichuan        104.4167       32.1333          111       138     2012      08        09        222              0.120417      25.317871       0.940521       0.285629       0.214000   -9999.000000   -9999.000000   -9999.000000
56180     56180     sichuan        104.4167       32.1333          111       138     2012      08        10        223              0.116000      25.657715       0.186892       0.279967       0.212000   -9999.000000       0.152300       0.752000
56180     56180     sichuan        104.4167       32.1333          111       138     2012      08        11        224              0.112125      25.705170       0.000000       0.275979       0.140000   -9999.000000       0.147600   -9999.000000
56180     56180     sichuan        104.4167       32.1333          111       138     2012      08        12        225              0.109167      25.489349       0.768970       0.274067   -9999.000000   -9999.000000       0.147900   -9999.000000
56180     56180     sichuan        104.4167       32.1333          111       138     2012      08        13        226              0.106292      26.640411       2.399020       0.271923       0.160000   -9999.000000       0.080300       0.886000
56180     56180     sichuan        104.4167       32.1333          111       138     2012      08        14        227              0.105458      25.617004       8.138953       0.275837       0.159000   -9999.000000   -9999.000000   -9999.000000
56180     56180     sichuan        104.4167       32.1333          111       138     2012      08        15        228              0.108167      24.489471       0.126684       0.295518       0.153500   -9999.000000       0.084200       0.735000
56180     56180     sichuan        104.4167       32.1333          111       138     2012      08        16        229              0.107542      25.454926       4.414519       0.284070       0.161000   -9999.000000       0.085500   -9999.000000
56180     56180     sichuan        104.4167       32.1333          111       138     2012      08        17        230              0.114667      25.050751      31.770197       0.283850   -9999.000000   -9999.000000       0.083900   -9999.000000
56180     56180     sichuan        104.4167       32.1333          111       138     2012      08        18        231              0.146000      24.045837       3.429036       0.319008       0.192000   -9999.000000       0.089700       1.000000
56180     56180     sichuan        104.4167       32.1333          111       138     2012      08        19        232              0.144708      22.879730       9.641708       0.315833       0.188000   -9999.000000   -9999.000000   -9999.000000
56180     56180     sichuan        104.4167       32.1333          111       138     2012      08        20        233              0.181625      22.223083       0.791551       0.311648       0.157000   -9999.000000   -9999.000000       0.758000
56180     56180     sichuan        104.4167       32.1333          111       138     2012      08        21        234              0.149250      23.751770       1.715509       0.302797       0.272000   -9999.000000       0.067900   -9999.000000
56180     56180     sichuan        104.4167       32.1333          111       138     2012      08        22        235              0.152583      22.442719       0.322572       0.293513   -9999.000000   -9999.000000       0.065600   -9999.000000
56180     56180     sichuan        104.4167       32.1333          111       138     2012      08        23        236              0.139292      21.030884       4.079464       0.289615       0.254000   -9999.000000       0.067500       0.792000
56180     56180     sichuan        104.4167       32.1333          111       138     2012      08        24        237              0.127750      21.684845       1.028136       0.287447       0.228000   -9999.000000       0.065600   -9999.000000
56180     56180     sichuan        104.4167       32.1333          111       138     2012      08        25        238              0.000000      21.765259       2.886245       0.282776       0.218000   -9999.000000   -9999.000000       0.835000
56180     56180     sichuan        104.4167       32.1333          111       138     2012      08        26        239              0.118333      22.323822      19.399311       0.287135       0.224000   -9999.000000   -9999.000000   -9999.000000
56180     56180     sichuan        104.4167       32.1333          111       138     2012      08        27        240              0.116333      22.993500      16.523819       0.292524       0.266000   -9999.000000       0.131800       0.945000
56180     56180     sichuan        104.4167       32.1333          111       138     2012      08        28        241              0.121667      22.299133       0.000000       0.315129   -9999.000000   -9999.000000       0.131100   -9999.000000
56180     56180     sichuan        104.4167       32.1333          111       138     2012      08        29        242              0.117042      22.938263       0.739538       0.297180       0.258000   -9999.000000       0.128000       0.707000
56180     56180     sichuan        104.4167       32.1333          111       138     2012      08        30        243              0.114583      23.079559       5.614613       0.288828       0.276500   -9999.000000       0.140700       0.872000
56180     56180     sichuan        104.4167       32.1333          111       138     2012      08        31        244              0.114042      21.650482       1.124077       0.298816       0.267500   -9999.000000   -9999.000000   -9999.000000
56180     56180     sichuan        104.4167       32.1333          111       138     2012      09        01        245              0.121833      22.017517      13.384480       0.294056   -9999.000000   -9999.000000       0.130700       0.884000
56180     56180     sichuan        104.4167       32.1333          111       138     2012      09        02        246              0.120125      20.976715       0.000000       0.316227   -9999.000000   -9999.000000       0.132100   -9999.000000
56180     56180     sichuan        104.4167       32.1333          111       138     2012      09        03        247              0.114833      22.047791       0.379308       0.294592       0.135000   -9999.000000       0.103000       0.615000
56180     56180     sichuan        104.4167       32.1333          111       138     2012      09        04        248              0.112417      22.162140       0.073579       0.287429       0.124500   -9999.000000       0.105600       0.673000
56180     56180     sichuan        104.4167       32.1333          111       138     2012      09        05        249              0.109458      21.182922       0.138487       0.283682       0.135000   -9999.000000   -9999.000000   -9999.000000
56180     56180     sichuan        104.4167       32.1333          111       138     2012      09        06        250              0.106417      21.250946       0.693722       0.281139       0.134000   -9999.000000   -9999.000000       0.883000
56180     56180     sichuan        104.4167       32.1333          111       138     2012      09        07        251              0.104667      21.463867       0.843172       0.280170       0.156000   -9999.000000       0.106100   -9999.000000
56180     56180     sichuan        104.4167       32.1333          111       138     2012      09        08        252              0.110708      20.349579       0.371442       0.281343   -9999.000000   -9999.000000       0.107400       0.707000
56180     56180     sichuan        104.4167       32.1333          111       138     2012      09        09        253              0.109083      22.276123      10.503057       0.277549       0.137000   -9999.000000       0.114300   -9999.000000
56180     56180     sichuan        104.4167       32.1333          111       138     2012      09        10        254              0.120583      21.112701       6.646687       0.293710       0.148500   -9999.000000       0.086900   -9999.000000
56180     56180     sichuan        104.4167       32.1333          111       138     2012      09        11        255              0.117000      20.653076      10.907294       0.308431       0.142000   -9999.000000   -9999.000000       0.827000
56180     56180     sichuan        104.4167       32.1333          111       138     2012      09        12        256              0.123250      21.960602       6.564054       0.306631       0.173000   -9999.000000   -9999.000000   -9999.000000
56180     56180     sichuan        104.4167       32.1333          111       138     2012      09        13        257              0.126708      19.033386       0.306960       0.312466   -9999.000000   -9999.000000       0.088100       0.663000
56180     56180     sichuan        104.4167       32.1333          111       138     2012      09        14        258              0.120167      18.155853       0.495029       0.298152       0.167000   -9999.000000       0.095100   -9999.000000
56180     56180     sichuan        104.4167       32.1333          111       138     2012      09        15        259              0.115333      18.358185      12.594656       0.290168       0.193000   -9999.000000       0.095700   -9999.000000
56180     56180     sichuan        104.4167       32.1333          111       138     2012      09        16        260              0.124458      16.708649       5.984967       0.303661       0.185500   -9999.000000   -9999.000000       1.000000
56180     56180     sichuan        104.4167       32.1333          111       138     2012      09        17        261              0.124667      16.031860       6.151279       0.314535       0.167000   -9999.000000   -9999.000000   -9999.000000
56180     56180     sichuan        104.4167       32.1333          111       138     2012      09        18        262              0.120708      16.719269       2.046839       0.297074   -9999.000000   -9999.000000       0.060000       0.683000
56180     56180     sichuan        104.4167       32.1333          111       138     2012      09        19        263              0.118667      16.919373       0.542853       0.296356       0.161000   -9999.000000       0.063200   -9999.000000
56180     56180     sichuan        104.4167       32.1333          111       138     2012      09        20        264              0.115458      17.205475       0.495335       0.289615       0.152000   -9999.000000       0.062700       0.840000
56180     56180     sichuan        104.4167       32.1333          111       138     2012      09        21        265              0.116250      16.676483       0.350782       0.289430   -9999.000000   -9999.000000       0.057500       0.781000
56180     56180     sichuan        104.4167       32.1333          111       138     2012      09        22        266              0.115250      18.380310       1.518363       0.285921       0.097500   -9999.000000   -9999.000000   -9999.000000
56180     56180     sichuan        104.4167       32.1333          111       138     2012      09        23        267              0.114000      18.386871       0.867365       0.286511       0.113000   -9999.000000   -9999.000000       0.833000
56180     56180     sichuan        104.4167       32.1333          111       138     2012      09        24        268              0.112292      18.301788      21.507019       0.285826   -9999.000000   -9999.000000       0.056700   -9999.000000
56180     56180     sichuan        104.4167       32.1333          111       138     2012      09        25        269              0.113500      17.315796       7.472329       0.311168       0.101000   -9999.000000       0.051000       0.848000
56180     56180     sichuan        104.4167       32.1333          111       138     2012      09        26        270              0.125417      17.136383       0.237236       0.319631       0.103500   -9999.000000       0.053700   -9999.000000
56180     56180     sichuan        104.4167       32.1333          111       138     2012      09        27        271              0.121786      18.177979       3.798713       0.300961       0.105500   -9999.000000       0.052400       0.714000
56180     56180     sichuan        104.4167       32.1333          111       138     2012      09        28        272              0.119467      18.449921       0.383826       0.300204       0.124000   -9999.000000   -9999.000000       0.655000
56180     56180     sichuan        104.4167       32.1333          111       138     2012      09        29        273              0.118792      18.065704       8.198563       0.294075   -9999.000000   -9999.000000       0.052700   -9999.000000
56180     56180     sichuan        104.4167       32.1333          111       138     2012      09        30        274              0.119333      17.143311       0.902450       0.306081       0.103000   -9999.000000       0.055800       0.738000
56180     56180     sichuan        104.4167       32.1333          111       138     2012      10        01        275              0.116542      17.675934       0.553587       0.297487       0.109000   -9999.000000       0.060200   -9999.000000
56180     56180     sichuan        104.4167       32.1333          111       138     2012      10        02        276              0.113667      16.712219       3.514759       0.293639       0.106500   -9999.000000       0.059700       0.751000
56180     56180     sichuan        104.4167       32.1333          111       138     2012      10        03        277              0.116125      16.162994      14.986705       0.299093       0.110500   -9999.000000   -9999.000000       0.798000
56180     56180     sichuan        104.4167       32.1333          111       138     2012      10        04        278              0.138375      17.427612      13.038643       0.308331       0.129000   -9999.000000   -9999.000000   -9999.000000
56180     56180     sichuan        104.4167       32.1333          111       138     2012      10        05        279              0.146333      16.111969       2.985880       0.325495   -9999.000000   -9999.000000       0.062300       0.873000
56180     56180     sichuan        104.4167       32.1333          111       138     2012      10        06        280              0.142542      16.366547       1.635007       0.308596   -9999.000000   -9999.000000       0.059700   -9999.000000
56180     56180     sichuan        104.4167       32.1333          111       138     2012      10        07        281              0.139292      15.431335       2.805977       0.302559       0.113000   -9999.000000       0.061900       0.820000
56180     56180     sichuan        104.4167       32.1333          111       138     2012      10        08        282              0.140167      15.259583       3.014973       0.301998       0.114500   -9999.000000       0.041000   -9999.000000
56180     56180     sichuan        104.4167       32.1333          111       138     2012      10        09        283              0.169042      15.409973       1.795865       0.300555   -9999.000000   -9999.000000   -9999.000000   -9999.000000
56180     56180     sichuan        104.4167       32.1333          111       138     2012      10        10        284              0.193708      14.780365       2.847754       0.301062   -9999.000000   -9999.000000   -9999.000000       0.718000
56180     56180     sichuan        104.4167       32.1333          111       138     2012      10        11        285              0.209667      14.764160      13.256507       0.297547   -9999.000000   -9999.000000       0.041500   -9999.000000
56180     56180     sichuan        104.4167       32.1333          111       138     2012      10        12        286              0.199833      14.305756       1.278699       0.311106       0.101500   -9999.000000       0.039400       0.713000
56180     56180     sichuan        104.4167       32.1333          111       138     2012      10        13        287              0.186458      14.429871       1.213014       0.310355       0.104000   -9999.000000       0.042800   -9999.000000
56180     56180     sichuan        104.4167       32.1333          111       138     2012      10        14        288              0.175917      15.217743       1.777149       0.299950       0.111000   -9999.000000       0.043400   -9999.000000
56180     56180     sichuan        104.4167       32.1333          111       138     2012      10        15        289              0.164875      14.593597       2.385980       0.298296       0.120000   -9999.000000   -9999.000000       0.922000
56180     56180     sichuan        104.4167       32.1333          111       138     2012      10        16        290              0.155542      15.094055       0.322955       0.299170       0.108000   -9999.000000       0.045600   -9999.000000
56180     56180     sichuan        104.4167       32.1333          111       138     2012      10        17        291              0.150042      14.404877       0.000000       0.294843       0.098000   -9999.000000       0.049000       0.622000
56180     56180     sichuan        104.4167       32.1333          111       138     2012      10        18        292              0.140125      14.331207       2.269086       0.291223       0.094000   -9999.000000       0.045300   -9999.000000
56180     56180     sichuan        104.4167       32.1333          111       138     2012      10        19        293              0.134875      14.327148       0.000000       0.293443       0.093500   -9999.000000       0.047800       0.736000
56180     56180     sichuan        104.4167       32.1333          111       138     2012      10        20        294              0.130917      15.517029       0.184799       0.291563       0.100000   -9999.000000   -9999.000000       0.714000
56180     56180     sichuan        104.4167       32.1333          111       138     2012      10        21        295              0.128333      14.970367       2.436234       0.289683   -9999.000000   -9999.000000   -9999.000000   -9999.000000
56180     56180     sichuan        104.4167       32.1333          111       138     2012      10        22        296              0.127125      14.362915       0.200045       0.293296   -9999.000000   -9999.000000       0.062900       0.667000
56180     56180     sichuan        104.4167       32.1333          111       138     2012      10        23        297              0.125667      15.186127       3.237513       0.290996   -9999.000000   -9999.000000       0.059800   -9999.000000
56180     56180     sichuan        104.4167       32.1333          111       138     2012      10        24        298              0.138000      12.936737       0.339412       0.293865   -9999.000000   -9999.000000       0.059700       0.717000
56180     56180     sichuan        104.4167       32.1333          111       138     2012      10        25        299              0.000000      13.632538       0.511525       0.293258       0.149000   -9999.000000       0.060900   -9999.000000
56180     56180     sichuan        104.4167       32.1333          111       138     2012      10        26        300              0.128958      13.615204       0.093783       0.289665   -9999.000000   -9999.000000   -9999.000000       0.659000
56180     56180     sichuan        104.4167       32.1333          111       138     2012      10        27        301              0.124167      14.901215       0.282811       0.286667       0.128000   -9999.000000   -9999.000000       0.540000
56180     56180     sichuan        104.4167       32.1333          111       138     2012      10        28        302              0.000000      15.489655       0.000000       0.284689       0.120500   -9999.000000       0.061800   -9999.000000
56180     56180     sichuan        104.4167       32.1333          111       138     2012      10        29        303              0.146125      14.034485       4.159098       0.284435       0.120500   -9999.000000       0.080200       0.635000
56180     56180     sichuan        104.4167       32.1333          111       138     2012      10        30        304              0.195708      14.491241       0.174763       0.290420       0.132500   -9999.000000       0.082200   -9999.000000
56180     56180     sichuan        104.4167       32.1333          111       138     2012      10        31        305              0.186917      13.186218       0.592060       0.286988       0.144000   -9999.000000       0.080500       0.610000
56180     56180     sichuan        104.4167       32.1333          111       138     2012      11        01        306              0.175667      13.748901       0.564684       0.284486   -9999.000000   -9999.000000   -9999.000000       0.520000
56180     56180     sichuan        104.4167       32.1333          111       138     2012      11        02        307              0.160458      13.611053       2.534451       0.282780       0.170000   -9999.000000       0.083500   -9999.000000
56180     56180     sichuan        104.4167       32.1333          111       138     2012      11        03        308              0.147917      12.589478       0.000000       0.281838       0.165500   -9999.000000       0.084700       0.597000
56180     56180     sichuan        104.4167       32.1333          111       138     2012      11        04        309              0.139042      10.408386       0.765264       0.280394       0.167500   -9999.000000       0.081200   -9999.000000
56180     56180     sichuan        104.4167       32.1333          111       138     2012      11        05        310              0.133583      11.174622       0.000000       0.278816       0.191000   -9999.000000       0.061400       0.428000
56180     56180     sichuan        104.4167       32.1333          111       138     2012      11        06        311              0.130583      11.014984       1.267267       0.277943   -9999.000000   -9999.000000   -9999.000000   -9999.000000
56180     56180     sichuan        104.4167       32.1333          111       138     2012      11        07        312              0.129958       9.854767       8.085033       0.280783       0.170000   -9999.000000   -9999.000000   -9999.000000
56180     56180     sichuan        104.4167       32.1333          111       138     2012      11        08        313              0.135833       9.684784       0.551555       0.297318       0.175500   -9999.000000       0.062000       0.634000
56180     56180     sichuan        104.4167       32.1333          111       138     2012      11        09        314              0.132792      10.384460       0.216848       0.293212       0.168500   -9999.000000       0.060200   -9999.000000
56180     56180     sichuan        104.4167       32.1333          111       138     2012      11        10        315              0.130375       9.969727       0.323431       0.287870       0.183000   -9999.000000       0.064200       0.643000
56180     56180     sichuan        104.4167       32.1333          111       138     2012      11        11        316              0.127167       9.370911       0.099336       0.284680       0.177000   -9999.000000       0.060900   -9999.000000
56180     56180     sichuan        104.4167       32.1333          111       138     2012      11        12        317              0.124792       9.512543       2.079558       0.282150   -9999.000000   -9999.000000   -9999.000000   -9999.000000
56180     56180     sichuan        104.4167       32.1333          111       138     2012      11        13        318              0.000000      10.638672       0.383428       0.279237       0.176000   -9999.000000       0.099600       0.658000
56180     56180     sichuan        104.4167       32.1333          111       138     2012      11        14        319              0.120000       9.665161       4.481361       0.278298       0.169000   -9999.000000       0.104300   -9999.000000
56180     56180     sichuan        104.4167       32.1333          111       138     2012      11        15        320              0.122958       9.094635       6.921393       0.277835       0.171000   -9999.000000       0.100500       0.557000
56180     56180     sichuan        104.4167       32.1333          111       138     2012      11        16        321              0.141250       9.697113       0.423196       0.290136       0.181000   -9999.000000       0.100200   -9999.000000
56180     56180     sichuan        104.4167       32.1333          111       138     2012      11        17        322              0.000000       9.566376       0.000000       0.288544   -9999.000000   -9999.000000   -9999.000000       0.588000
56180     56180     sichuan        104.4167       32.1333          111       138     2012      11        18        323              0.128583       9.537750       1.423148       0.281926       0.175000   -9999.000000   -9999.000000       0.602000
56180     56180     sichuan        104.4167       32.1333          111       138     2012      11        19        324              0.125208       9.548004       0.000000       0.279144       0.172000   -9999.000000       0.087600   -9999.000000
56180     56180     sichuan        104.4167       32.1333          111       138     2012      11        20        325              0.121167       9.207794       0.348922       0.277255       0.174500   -9999.000000       0.089800       0.494000
56180     56180     sichuan        104.4167       32.1333          111       138     2012      11        21        326              0.119125       8.792419       0.241452       0.276218       0.142000   -9999.000000       0.088200   -9999.000000
56180     56180     sichuan        104.4167       32.1333          111       138     2012      11        22        327              0.117375       8.795532       0.000000       0.275527   -9999.000000   -9999.000000       0.085900       0.555000
56180     56180     sichuan        104.4167       32.1333          111       138     2012      11        23        328              0.115917       7.842255       0.000000       0.274470   -9999.000000   -9999.000000   -9999.000000   -9999.000000
56180     56180     sichuan        104.4167       32.1333          111       138     2012      11        24        329              0.114625       7.761566       0.084698       0.272895   -9999.000000   -9999.000000   -9999.000000       0.438000
56180     56180     sichuan        104.4167       32.1333          111       138     2012      11        25        330              0.113125       6.795532       1.364988       0.272598   -9999.000000   -9999.000000       0.088900       0.342000
56180     56180     sichuan        104.4167       32.1333          111       138     2012      11        26        331              0.113333       6.358368       2.103802       0.274114   -9999.000000   -9999.000000       0.088500   -9999.000000
56180     56180     sichuan        104.4167       32.1333          111       138     2012      11        27        332              0.112750       6.432159       0.000000       0.272432       0.151000   -9999.000000       0.086600       0.433000
56180     56180     sichuan        104.4167       32.1333          111       138     2012      11        28        333              0.112208       6.621918       0.000000       0.271291   -9999.000000   -9999.000000       0.088700   -9999.000000
56180     56180     sichuan        104.4167       32.1333          111       138     2012      11        29        334              0.110583       6.659729       0.000000       0.270167   -9999.000000   -9999.000000   -9999.000000       0.237000
56180     56180     sichuan        104.4167       32.1333          111       138     2012      11        30        335              0.110000       6.026215       0.503634       0.269590       0.143000   -9999.000000       0.083700   -9999.000000
56180     56180     sichuan        104.4167       32.1333          111       138     2012      12        01        336              0.110792       4.925995       1.545857       0.270258       0.170000   -9999.000000       0.088700   -9999.000000
56180     56180     sichuan        104.4167       32.1333          111       138     2012      12        02        337              0.110125       6.037567       0.000000       0.276638       0.178000   -9999.000000       0.085100       0.400000
56180     56180     sichuan        104.4167       32.1333          111       138     2012      12        03        338              0.109500       6.500702       0.178322       0.271584   -9999.000000   -9999.000000       0.086500   -9999.000000
56180     56180     sichuan        104.4167       32.1333          111       138     2012      12        04        339              0.107250       6.279114       0.250589       0.270498   -9999.000000   -9999.000000   -9999.000000       0.313000
56180     56180     sichuan        104.4167       32.1333          111       138     2012      12        05        340              0.106625       5.418945       0.000000       0.269377       0.167000   -9999.000000   -9999.000000   -9999.000000
56180     56180     sichuan        104.4167       32.1333          111       138     2012      12        06        341              0.106333       6.233856       0.000000       0.267898       0.171000   -9999.000000       0.086500   -9999.000000
56180     56180     sichuan        104.4167       32.1333          111       138     2012      12        07        342              0.106042       6.330414       0.000000       0.267048       0.166000   -9999.000000       0.085700       0.454000
56180     56180     sichuan        104.4167       32.1333          111       138     2012      12        08        343              0.105833       5.899231       0.000000       0.266560       0.168000   -9999.000000       0.087200   -9999.000000
56180     56180     sichuan        104.4167       32.1333          111       138     2012      12        09        344              0.105833       6.503357       1.730973       0.266014   -9999.000000   -9999.000000       0.084700       0.365000
56180     56180     sichuan        104.4167       32.1333          111       138     2012      12        10        345              0.104792       6.815430       0.000000       0.265958   -9999.000000   -9999.000000   -9999.000000   -9999.000000
56180     56180     sichuan        104.4167       32.1333          111       138     2012      12        11        346              0.103500       6.718658       0.775648       0.265516       0.155000   -9999.000000   -9999.000000   -9999.000000
56180     56180     sichuan        104.4167       32.1333          111       138     2012      12        12        347              0.103458       5.204987       1.567877       0.266984       0.172000   -9999.000000       0.097000       0.411000
56180     56180     sichuan        104.4167       32.1333          111       138     2012      12        13        348              0.103917       5.038696       0.261603       0.272509       0.166000   -9999.000000       0.091200   -9999.000000
56180     56180     sichuan        104.4167       32.1333          111       138     2012      12        14        349              0.103625       5.591980       0.000000       0.270569   -9999.000000   -9999.000000       0.091800       0.358000
56180     56180     sichuan        104.4167       32.1333          111       138     2012      12        15        350              0.000000       6.018646       0.247417       0.268231       0.164000   -9999.000000       0.092000   -9999.000000
56180     56180     sichuan        104.4167       32.1333          111       138     2012      12        16        351              0.102750       5.032043       0.209343       0.267513       0.164000   -9999.000000   -9999.000000       0.348000
56180     56180     sichuan        104.4167       32.1333          111       138     2012      12        17        352              0.101500       6.599701       1.115845       0.267076   -9999.000000   -9999.000000       0.065600       0.396000
56180     56180     sichuan        104.4167       32.1333          111       138     2012      12        18        353              0.100292       4.930664       0.000000       0.266817   -9999.000000   -9999.000000       0.067700   -9999.000000
56180     56180     sichuan        104.4167       32.1333          111       138     2012      12        19        354              0.099958       4.301971       0.205439       0.265052   -9999.000000   -9999.000000       0.063300       0.188000
56180     56180     sichuan        104.4167       32.1333          111       138     2012      12        20        355              0.000000       4.204926       0.782925       0.264447   -9999.000000   -9999.000000       0.063600   -9999.000000
56180     56180     sichuan        104.4167       32.1333          111       138     2012      12        21        356              0.099292       4.060303       0.700903       0.267092   -9999.000000   -9999.000000   -9999.000000       0.385000
56180     56180     sichuan        104.4167       32.1333          111       138     2012      12        22        357              0.099208       2.890961       1.804367       0.261168   -9999.000000   -9999.000000   -9999.000000   -9999.000000
56180     56180     sichuan        104.4167       32.1333          111       138     2012      12        23        358              0.099458       2.447815       1.538281       0.254759   -9999.000000   -9999.000000       0.063700       0.153000
56180     56180     sichuan        104.4167       32.1333          111       138     2012      12        24        359              0.098350       2.007050       0.215780       0.244347   -9999.000000   -9999.000000       0.053400       0.103000
56180     56180     sichuan        104.4167       32.1333          111       138     2012      12        25        360              0.099500       2.143127       0.000000       0.246405   -9999.000000   -9999.000000       0.056000   -9999.000000
56180     56180     sichuan        104.4167       32.1333          111       138     2012      12        26        361              0.000000       2.796021       0.580254       0.251878   -9999.000000   -9999.000000       0.052400       0.179000
56180     56180     sichuan        104.4167       32.1333          111       138     2012      12        27        362              0.097182       2.074493       0.000000       0.246151   -9999.000000   -9999.000000   -9999.000000   -9999.000000
56180     56180     sichuan        104.4167       32.1333          111       138     2012      12        28        363              0.000000       1.568329       0.145004       0.238647   -9999.000000   -9999.000000       0.049500       0.065000
56180     56180     sichuan        104.4167       32.1333          111       138     2012      12        29        364              0.000000       1.491211       0.249222       0.235073   -9999.000000   -9999.000000       0.052400       0.002000
56180     56180     sichuan        104.4167       32.1333          111       138     2012      12        30        365              0.000000       0.278351       1.347228       0.200538   -9999.000000   -9999.000000       0.049600   -9999.000000
56180     56180     sichuan        104.4167       32.1333          111       138     2012      12        31        366              0.093733       0.322784       0.324512       0.192491   -9999.000000   -9999.000000       0.055000       0.151000
