# Supplementary material for: Research on Fusing Multisatellite Soil Moisture Data Based on Bayesian Model Averaging
Source: Hindawi journal article supplement (doi:10.1155/2018/9310838), 2018-06-25
Supplement: f1 [file 9310838.f1.zip › 2012_sm00-10cm_daily_ZDB_ZHY_56184_366days_allin.txt]

56184     56184     sichuan        103.1667       31.4333          114       133     2012      01        01        001              0.000000   -9999.000000       0.000000   -9999.000000   -9999.000000   -9999.000000   -9999.000000   -9999.000000
56184     56184     sichuan        103.1667       31.4333          114       133     2012      01        02        002              0.067292       0.100708       0.000000       0.179517   -9999.000000   -9999.000000       0.029300   -9999.000000
56184     56184     sichuan        103.1667       31.4333          114       133     2012      01        03        003              0.000000      -0.422821       0.000000       0.168522   -9999.000000   -9999.000000       0.032300       0.054000
56184     56184     sichuan        103.1667       31.4333          114       133     2012      01        04        004              0.067292      -1.735840       0.000000       0.149782   -9999.000000   -9999.000000       0.018500   -9999.000000
56184     56184     sichuan        103.1667       31.4333          114       133     2012      01        05        005              0.056250      -1.796783       0.000000       0.145521   -9999.000000   -9999.000000       0.013700   -9999.000000
56184     56184     sichuan        103.1667       31.4333          114       133     2012      01        06        006              0.045208      -1.473572       0.000000       0.153421   -9999.000000   -9999.000000   -9999.000000       0.048000
56184     56184     sichuan        103.1667       31.4333          114       133     2012      01        07        007              0.056750      -1.288788       0.000000       0.156460   -9999.000000   -9999.000000   -9999.000000   -9999.000000
56184     56184     sichuan        103.1667       31.4333          114       133     2012      01        08        008              0.000000      -1.192505       0.000000       0.157606   -9999.000000   -9999.000000       0.031900       0.061000
56184     56184     sichuan        103.1667       31.4333          114       133     2012      01        09        009              0.059875      -0.824493       0.000000       0.163293   -9999.000000   -9999.000000       0.032900   -9999.000000
56184     56184     sichuan        103.1667       31.4333          114       133     2012      01        10        010              0.068917      -0.499969       0.000000       0.167270   -9999.000000   -9999.000000   -9999.000000   -9999.000000
56184     56184     sichuan        103.1667       31.4333          114       133     2012      01        11        011              0.063917      -0.904358       0.000000       0.161219   -9999.000000   -9999.000000       0.014200   -9999.000000
56184     56184     sichuan        103.1667       31.4333          114       133     2012      01        12        012              0.056208      -1.127747       0.000000       0.158564   -9999.000000   -9999.000000   -9999.000000   -9999.000000
56184     56184     sichuan        103.1667       31.4333          114       133     2012      01        13        013              0.067250      -1.207184       0.000000       0.156880   -9999.000000   -9999.000000   -9999.000000       0.087000
56184     56184     sichuan        103.1667       31.4333          114       133     2012      01        14        014              0.071000      -1.166473       0.000000       0.159087   -9999.000000   -9999.000000       0.029600   -9999.000000
56184     56184     sichuan        103.1667       31.4333          114       133     2012      01        15        015              0.050667      -1.670013       0.000000       0.152884   -9999.000000   -9999.000000       0.013800       0.021000
56184     56184     sichuan        103.1667       31.4333          114       133     2012      01        16        016              0.049083      -1.468597       0.000000       0.154614   -9999.000000   -9999.000000       0.015000   -9999.000000
56184     56184     sichuan        103.1667       31.4333          114       133     2012      01        17        017              0.000000      -0.563965       0.000000       0.167425   -9999.000000   -9999.000000   -9999.000000   -9999.000000
56184     56184     sichuan        103.1667       31.4333          114       133     2012      01        18        018              0.066125      -1.159454       0.000000       0.158549   -9999.000000   -9999.000000   -9999.000000       0.024000
56184     56184     sichuan        103.1667       31.4333          114       133     2012      01        19        019              0.068458      -0.966644       0.000000       0.161363   -9999.000000   -9999.000000       0.026400   -9999.000000
56184     56184     sichuan        103.1667       31.4333          114       133     2012      01        20        020              0.077500      -0.480011       0.000000       0.169199   -9999.000000   -9999.000000       0.028900       0.042000
56184     56184     sichuan        103.1667       31.4333          114       133     2012      01        21        021              0.080000      -0.948212       0.000000       0.161862   -9999.000000   -9999.000000       0.013900   -9999.000000
56184     56184     sichuan        103.1667       31.4333          114       133     2012      01        22        022              0.077583      -1.677216       0.000000       0.152163   -9999.000000   -9999.000000       0.010000   -9999.000000
56184     56184     sichuan        103.1667       31.4333          114       133     2012      01        23        023              0.054583      -2.231873       0.000000       0.144227   -9999.000000   -9999.000000   -9999.000000       0.079000
56184     56184     sichuan        103.1667       31.4333          114       133     2012      01        24        024              0.054750      -1.458252       0.000000       0.153847   -9999.000000   -9999.000000   -9999.000000   -9999.000000
56184     56184     sichuan        103.1667       31.4333          114       133     2012      01        25        025              0.044667      -1.609070       4.634783       0.152395   -9999.000000   -9999.000000       0.037700       0.016000
56184     56184     sichuan        103.1667       31.4333          114       133     2012      01        26        026              0.042917      -1.012268       0.000000       0.163182       0.116000   -9999.000000       0.012800   -9999.000000
56184     56184     sichuan        103.1667       31.4333          114       133     2012      01        27        027              0.050583      -0.319061       0.000000       0.172716   -9999.000000   -9999.000000       0.040500       0.091000
56184     56184     sichuan        103.1667       31.4333          114       133     2012      01        28        028              0.065958      -0.531219       0.000000       0.170306   -9999.000000   -9999.000000       0.014200       0.031000
56184     56184     sichuan        103.1667       31.4333          114       133     2012      01        29        029              0.082292      -0.083740       0.000000       0.176208   -9999.000000   -9999.000000   -9999.000000   -9999.000000
56184     56184     sichuan        103.1667       31.4333          114       133     2012      01        30        030              0.082167      -0.390717       0.000000       0.172140   -9999.000000   -9999.000000   -9999.000000       0.027000
56184     56184     sichuan        103.1667       31.4333          114       133     2012      01        31        031              0.083500       0.056335       0.000000       0.178314       0.120000   -9999.000000       0.048400   -9999.000000
56184     56184     sichuan        103.1667       31.4333          114       133     2012      02        01        032              0.096250       0.584015       0.000000       0.184671       0.122000   -9999.000000       0.027300       0.067000
56184     56184     sichuan        103.1667       31.4333          114       133     2012      02        02        033              0.112792       0.766968       0.000000       0.189748   -9999.000000   -9999.000000       0.022800   -9999.000000
56184     56184     sichuan        103.1667       31.4333          114       133     2012      02        03        034              0.104333       0.130463       0.000000       0.183091   -9999.000000   -9999.000000   -9999.000000       0.029000
56184     56184     sichuan        103.1667       31.4333          114       133     2012      02        04        035              0.099917       0.973480       0.000000       0.192482   -9999.000000   -9999.000000   -9999.000000       0.028000
56184     56184     sichuan        103.1667       31.4333          114       133     2012      02        05        036              0.097250       1.580780       0.000000       0.201043   -9999.000000   -9999.000000       0.049000   -9999.000000
56184     56184     sichuan        103.1667       31.4333          114       133     2012      02        06        037              0.094125       1.457184       0.000000       0.202651   -9999.000000   -9999.000000       0.039300       0.066000
56184     56184     sichuan        103.1667       31.4333          114       133     2012      02        07        038              0.091208       0.653046       0.000000       0.193257   -9999.000000   -9999.000000       0.037900   -9999.000000
56184     56184     sichuan        103.1667       31.4333          114       133     2012      02        08        039              0.089417       1.759888       0.000000       0.206914   -9999.000000   -9999.000000       0.019400   -9999.000000
56184     56184     sichuan        103.1667       31.4333          114       133     2012      02        09        040              0.086458       1.140717       0.000000       0.199915   -9999.000000   -9999.000000   -9999.000000   -9999.000000
56184     56184     sichuan        103.1667       31.4333          114       133     2012      02        10        041              0.086833      -0.552429       0.000000       0.178184   -9999.000000   -9999.000000   -9999.000000   -9999.000000
56184     56184     sichuan        103.1667       31.4333          114       133     2012      02        11        042              0.090333      -2.309509       0.000000       0.150721   -9999.000000   -9999.000000       0.034800       0.078000
56184     56184     sichuan        103.1667       31.4333          114       133     2012      02        12        043              0.103583      -0.930908       0.000000       0.172076   -9999.000000   -9999.000000       0.037900   -9999.000000
56184     56184     sichuan        103.1667       31.4333          114       133     2012      02        13        044              0.102833      -0.201141       0.000000       0.181555   -9999.000000   -9999.000000       0.028900       0.045000
56184     56184     sichuan        103.1667       31.4333          114       133     2012      02        14        045              0.097417       1.031494       0.000000       0.197598   -9999.000000   -9999.000000   -9999.000000   -9999.000000
56184     56184     sichuan        103.1667       31.4333          114       133     2012      02        15        046              0.093792       1.180389       0.000000       0.200689   -9999.000000   -9999.000000   -9999.000000   -9999.000000
56184     56184     sichuan        103.1667       31.4333          114       133     2012      02        16        047              0.090458       0.879486       0.000000       0.198849   -9999.000000   -9999.000000   -9999.000000       0.047000
56184     56184     sichuan        103.1667       31.4333          114       133     2012      02        17        048              0.087750       0.398010       0.000000       0.191022   -9999.000000   -9999.000000       0.029500   -9999.000000
56184     56184     sichuan        103.1667       31.4333          114       133     2012      02        18        049              0.099167       0.157074       0.000000       0.187368   -9999.000000   -9999.000000       0.011000       0.004000
56184     56184     sichuan        103.1667       31.4333          114       133     2012      02        19        050              0.105542      -0.762726       0.000000       0.174904   -9999.000000   -9999.000000       0.012500   -9999.000000
56184     56184     sichuan        103.1667       31.4333          114       133     2012      02        20        051              0.100375       1.481934       0.000000       0.201221   -9999.000000   -9999.000000   -9999.000000   -9999.000000
56184     56184     sichuan        103.1667       31.4333          114       133     2012      02        21        052              0.095391       1.576599       0.000000       0.201618       0.088000   -9999.000000   -9999.000000       0.208000
56184     56184     sichuan        103.1667       31.4333          114       133     2012      02        22        053              0.090870       2.954895       0.000000       0.216931       0.111000   -9999.000000       0.035100   -9999.000000
56184     56184     sichuan        103.1667       31.4333          114       133     2012      02        23        054              0.088391       2.954132       0.000000       0.219897       0.106000   -9999.000000       0.038400       0.109000
56184     56184     sichuan        103.1667       31.4333          114       133     2012      02        24        055              0.086708       4.030853       0.000000       0.231334   -9999.000000   -9999.000000       0.041700   -9999.000000
56184     56184     sichuan        103.1667       31.4333          114       133     2012      02        25        056              0.085375       3.428101       0.000000       0.230297   -9999.000000   -9999.000000       0.023500       0.072000
56184     56184     sichuan        103.1667       31.4333          114       133     2012      02        26        057              0.084958       2.815521       0.000000       0.225478   -9999.000000   -9999.000000   -9999.000000       0.023000
56184     56184     sichuan        103.1667       31.4333          114       133     2012      02        27        058              0.094810       0.468201       0.000000       0.194846   -9999.000000   -9999.000000   -9999.000000   -9999.000000
56184     56184     sichuan        103.1667       31.4333          114       133     2012      02        28        059              0.092043       0.202850       0.000000       0.185887   -9999.000000   -9999.000000   -9999.000000       0.074000
56184     56184     sichuan        103.1667       31.4333          114       133     2012      02        29        060              0.000000   -9999.000000       0.000000   -9999.000000   -9999.000000   -9999.000000   -9999.000000   -9999.000000
56184     56184     sichuan        103.1667       31.4333          114       133     2012      03        01        061              0.085591       2.499298       0.000000       0.214677   -9999.000000   -9999.000000       0.034300       0.055000
56184     56184     sichuan        103.1667       31.4333          114       133     2012      03        02        062              0.084625       1.751465       0.000000       0.210192   -9999.000000   -9999.000000       0.013300   -9999.000000
56184     56184     sichuan        103.1667       31.4333          114       133     2012      03        03        063              0.082333       2.262787       0.000000       0.213393   -9999.000000   -9999.000000   -9999.000000       0.085000
56184     56184     sichuan        103.1667       31.4333          114       133     2012      03        04        064              0.080750       3.177277       0.000000       0.223483   -9999.000000   -9999.000000       0.010000       0.153000
56184     56184     sichuan        103.1667       31.4333          114       133     2012      03        05        065              0.079708       2.736877       0.192762       0.218414   -9999.000000   -9999.000000       0.030700   -9999.000000
56184     56184     sichuan        103.1667       31.4333          114       133     2012      03        06        066              0.078500       4.433990       0.000000       0.231148   -9999.000000   -9999.000000       0.012000       0.177000
56184     56184     sichuan        103.1667       31.4333          114       133     2012      03        07        067              0.000000       2.453918       0.000000       0.224344   -9999.000000   -9999.000000       0.016700   -9999.000000
56184     56184     sichuan        103.1667       31.4333          114       133     2012      03        08        068              0.077792       1.953735       0.000000       0.214421   -9999.000000   -9999.000000   -9999.000000       0.032000
56184     56184     sichuan        103.1667       31.4333          114       133     2012      03        09        069              0.076875       1.395660       0.000000       0.205256   -9999.000000   -9999.000000   -9999.000000   -9999.000000
56184     56184     sichuan        103.1667       31.4333          114       133     2012      03        10        070              0.075542       1.821381       0.000000       0.206815   -9999.000000   -9999.000000       0.027100   -9999.000000
56184     56184     sichuan        103.1667       31.4333          114       133     2012      03        11        071              0.074000       3.141510       0.000000       0.218876   -9999.000000   -9999.000000       0.010000       0.190000
56184     56184     sichuan        103.1667       31.4333          114       133     2012      03        12        072              0.073292       4.222992       0.000000       0.231245   -9999.000000   -9999.000000       0.034400   -9999.000000
56184     56184     sichuan        103.1667       31.4333          114       133     2012      03        13        073              0.072500       4.584839       0.000000       0.235990       0.092000   -9999.000000       0.023900       0.178000
56184     56184     sichuan        103.1667       31.4333          114       133     2012      03        14        074              0.078833       5.916931       0.000000       0.240541       0.095000   -9999.000000   -9999.000000   -9999.000000
56184     56184     sichuan        103.1667       31.4333          114       133     2012      03        15        075              0.098167       4.401672       0.000000       0.238762       0.115000   -9999.000000   -9999.000000   -9999.000000
56184     56184     sichuan        103.1667       31.4333          114       133     2012      03        16        076              0.092500       5.646729       8.004560       0.242265   -9999.000000   -9999.000000       0.029900       0.264000
56184     56184     sichuan        103.1667       31.4333          114       133     2012      03        17        077              0.000000       4.725098       0.000000       0.239474   -9999.000000   -9999.000000       0.011500   -9999.000000
56184     56184     sichuan        103.1667       31.4333          114       133     2012      03        18        078              0.000000       6.574982       0.071611       0.239407       0.092000   -9999.000000       0.023200       0.307000
56184     56184     sichuan        103.1667       31.4333          114       133     2012      03        19        079              0.000000       8.163483       0.190452       0.243977       0.094000   -9999.000000       0.018200   -9999.000000
56184     56184     sichuan        103.1667       31.4333          114       133     2012      03        20        080              0.000000       8.245789       2.337992       0.245999       0.111000   -9999.000000   -9999.000000   -9999.000000
56184     56184     sichuan        103.1667       31.4333          114       133     2012      03        21        081              0.000000       9.501099       0.772135       0.248645   -9999.000000   -9999.000000       0.017400       0.341000
56184     56184     sichuan        103.1667       31.4333          114       133     2012      03        22        082              0.000000      10.829254       0.936597       0.249675   -9999.000000   -9999.000000       0.031600   -9999.000000
56184     56184     sichuan        103.1667       31.4333          114       133     2012      03        23        083              0.000000       5.379608       0.000000       0.237609   -9999.000000   -9999.000000       0.017100       0.045000
56184     56184     sichuan        103.1667       31.4333          114       133     2012      03        24        084              0.000000       3.067413       1.095790       0.218045       0.124000   -9999.000000       0.029700   -9999.000000
56184     56184     sichuan        103.1667       31.4333          114       133     2012      03        25        085              0.000000       5.544220       0.189023       0.233842       0.134000   -9999.000000   -9999.000000       0.417000
56184     56184     sichuan        103.1667       31.4333          114       133     2012      03        26        086              0.000000       6.558380       0.296882       0.240359   -9999.000000   -9999.000000   -9999.000000   -9999.000000
56184     56184     sichuan        103.1667       31.4333          114       133     2012      03        27        087              0.000000       7.969940       0.812907       0.247053   -9999.000000   -9999.000000       0.025100   -9999.000000
56184     56184     sichuan        103.1667       31.4333          114       133     2012      03        28        088              0.085667       8.924347       0.276350       0.250847       0.115000   -9999.000000       0.013300       0.330000
56184     56184     sichuan        103.1667       31.4333          114       133     2012      03        29        089              0.109692      10.328033       0.262687       0.251134   -9999.000000   -9999.000000       0.030200   -9999.000000
56184     56184     sichuan        103.1667       31.4333          114       133     2012      03        30        090              0.134417       5.147736       1.713794       0.241024   -9999.000000   -9999.000000       0.018200       0.381000
56184     56184     sichuan        103.1667       31.4333          114       133     2012      03        31        091              0.126833       4.253174       0.000000       0.231117   -9999.000000   -9999.000000   -9999.000000   -9999.000000
56184     56184     sichuan        103.1667       31.4333          114       133     2012      04        01        092              0.111167       4.457825       0.872344       0.226937   -9999.000000   -9999.000000   -9999.000000       0.346000
56184     56184     sichuan        103.1667       31.4333          114       133     2012      04        02        093              0.096583       7.560822       0.248038       0.243896   -9999.000000   -9999.000000       0.033900       0.387000
56184     56184     sichuan        103.1667       31.4333          114       133     2012      04        03        094              0.086042      11.361694       0.093737       0.248068       0.112000   -9999.000000       0.023000   -9999.000000
56184     56184     sichuan        103.1667       31.4333          114       133     2012      04        04        095              0.103375      12.488037       2.949573       0.245347       0.117000   -9999.000000       0.038000       0.389000
56184     56184     sichuan        103.1667       31.4333          114       133     2012      04        05        096              0.136417      10.058990       3.559532       0.253368   -9999.000000   -9999.000000       0.035500   -9999.000000
56184     56184     sichuan        103.1667       31.4333          114       133     2012      04        06        097              0.123625       6.983734       1.264241       0.256344   -9999.000000   -9999.000000   -9999.000000       0.241000
56184     56184     sichuan        103.1667       31.4333          114       133     2012      04        07        098              0.125792       6.534668       3.656380       0.253310   -9999.000000   -9999.000000       0.020500   -9999.000000
56184     56184     sichuan        103.1667       31.4333          114       133     2012      04        08        099              0.120875       6.706085       0.000000       0.253257   -9999.000000   -9999.000000       0.031900   -9999.000000
56184     56184     sichuan        103.1667       31.4333          114       133     2012      04        09        100              0.106125       7.814911       2.082757       0.255363       0.125000   -9999.000000       0.020400       0.548000
56184     56184     sichuan        103.1667       31.4333          114       133     2012      04        10        101              0.093708      10.602417       0.733582       0.258023       0.128000   -9999.000000       0.031300   -9999.000000
56184     56184     sichuan        103.1667       31.4333          114       133     2012      04        11        102              0.084042      12.485352       1.723915       0.254703   -9999.000000   -9999.000000   -9999.000000       0.293000
56184     56184     sichuan        103.1667       31.4333          114       133     2012      04        12        103              0.090417      13.957306       2.447073       0.254205   -9999.000000   -9999.000000   -9999.000000   -9999.000000
56184     56184     sichuan        103.1667       31.4333          114       133     2012      04        13        104              0.125125       8.057098       1.237310       0.261266       0.117000   -9999.000000       0.032100   -9999.000000
56184     56184     sichuan        103.1667       31.4333          114       133     2012      04        14        105              0.134750       7.881012       0.782130       0.260895       0.130000   -9999.000000       0.029500       0.428000
56184     56184     sichuan        103.1667       31.4333          114       133     2012      04        15        106              0.149375       9.700806       1.498123       0.259889       0.128000   -9999.000000       0.033900   -9999.000000
56184     56184     sichuan        103.1667       31.4333          114       133     2012      04        16        107              0.155833       7.847229       0.000000       0.258274   -9999.000000   -9999.000000       0.031000       0.229000
56184     56184     sichuan        103.1667       31.4333          114       133     2012      04        17        108              0.147125       5.310516       1.436108       0.250157   -9999.000000   -9999.000000   -9999.000000   -9999.000000
56184     56184     sichuan        103.1667       31.4333          114       133     2012      04        18        109              0.136333       6.641937       0.172850       0.250908   -9999.000000   -9999.000000   -9999.000000   -9999.000000
56184     56184     sichuan        103.1667       31.4333          114       133     2012      04        19        110              0.130125       8.986206       0.324862       0.255697   -9999.000000   -9999.000000       0.025900       0.423000
56184     56184     sichuan        103.1667       31.4333          114       133     2012      04        20        111              0.118625       7.932404       0.453341       0.255332       0.136000   -9999.000000       0.012300   -9999.000000
56184     56184     sichuan        103.1667       31.4333          114       133     2012      04        21        112              0.105250       9.916718       1.568701       0.248926       0.142000   -9999.000000       0.028800       0.259000
56184     56184     sichuan        103.1667       31.4333          114       133     2012      04        22        113              0.092542      10.767853       0.375648       0.252196   -9999.000000   -9999.000000   -9999.000000   -9999.000000
56184     56184     sichuan        103.1667       31.4333          114       133     2012      04        23        114              0.084167      13.368835       0.172559       0.248475   -9999.000000   -9999.000000   -9999.000000       0.335000
56184     56184     sichuan        103.1667       31.4333          114       133     2012      04        24        115              0.113708      14.481781       0.847310       0.244362       0.135000   -9999.000000       0.024300       0.541000
56184     56184     sichuan        103.1667       31.4333          114       133     2012      04        25        116              0.000000      12.552612       0.507397       0.245976       0.151000   -9999.000000       0.023000   -9999.000000
56184     56184     sichuan        103.1667       31.4333          114       133     2012      04        26        117              0.108583      12.062103       0.924206       0.243127       0.144000   -9999.000000       0.012500       0.248000
56184     56184     sichuan        103.1667       31.4333          114       133     2012      04        27        118              0.114750      13.395325       1.351532       0.242389   -9999.000000   -9999.000000       0.031500   -9999.000000
56184     56184     sichuan        103.1667       31.4333          114       133     2012      04        28        119              0.120167      13.595123       0.560603       0.244626   -9999.000000   -9999.000000   -9999.000000       0.376000
56184     56184     sichuan        103.1667       31.4333          114       133     2012      04        29        120              0.103458      14.937775       0.497005       0.242238       0.121000   -9999.000000   -9999.000000   -9999.000000
56184     56184     sichuan        103.1667       31.4333          114       133     2012      04        30        121              0.097208      13.482086       8.083125       0.240217       0.133000   -9999.000000       0.029000       0.333000
56184     56184     sichuan        103.1667       31.4333          114       133     2012      05        01        122              0.131750      14.970001       1.729538       0.253052       0.211000   -9999.000000       0.030400       0.003000
56184     56184     sichuan        103.1667       31.4333          114       133     2012      05        02        123              0.110333      11.665924       3.722267       0.273029   -9999.000000   -9999.000000       0.035300   -9999.000000
56184     56184     sichuan        103.1667       31.4333          114       133     2012      05        03        124              0.098167      12.452728       2.068683       0.273666   -9999.000000   -9999.000000       0.033600       0.509000
56184     56184     sichuan        103.1667       31.4333          114       133     2012      05        04        125              0.088583      13.846161       0.268244       0.273891   -9999.000000   -9999.000000   -9999.000000   -9999.000000
56184     56184     sichuan        103.1667       31.4333          114       133     2012      05        05        126              0.078542      13.894165       0.000000       0.266866       0.169000   -9999.000000   -9999.000000       0.074000
56184     56184     sichuan        103.1667       31.4333          114       133     2012      05        06        127              0.070500      14.966614       1.938637       0.260344       0.179000   -9999.000000       0.023600   -9999.000000
56184     56184     sichuan        103.1667       31.4333          114       133     2012      05        07        128              0.063125      16.960358       1.422660       0.260131   -9999.000000   -9999.000000       0.034600   -9999.000000
56184     56184     sichuan        103.1667       31.4333          114       133     2012      05        08        129              0.081833      18.364807       5.071988       0.258012   -9999.000000   -9999.000000       0.039800       0.702000
56184     56184     sichuan        103.1667       31.4333          114       133     2012      05        09        130              0.099125      16.909332       1.658060       0.267132   -9999.000000   -9999.000000   -9999.000000   -9999.000000
56184     56184     sichuan        103.1667       31.4333          114       133     2012      05        10        131              0.076000      17.563690       1.012163       0.265811       0.159000   -9999.000000   -9999.000000       0.191000
56184     56184     sichuan        103.1667       31.4333          114       133     2012      05        11        132              0.106583      19.346680      15.789538       0.259569   -9999.000000   -9999.000000       0.038200   -9999.000000
56184     56184     sichuan        103.1667       31.4333          114       133     2012      05        12        133              0.162083      16.235718       0.921452       0.288695   -9999.000000   -9999.000000       0.039400   -9999.000000
56184     56184     sichuan        103.1667       31.4333          114       133     2012      05        13        134              0.157500      13.891052      11.142901       0.292517   -9999.000000   -9999.000000       0.034200       0.770000
56184     56184     sichuan        103.1667       31.4333          114       133     2012      05        14        135              0.146542      13.233032       0.774291       0.303106   -9999.000000   -9999.000000       0.039600   -9999.000000
56184     56184     sichuan        103.1667       31.4333          114       133     2012      05        15        136              0.129375      11.298004       0.455740       0.294371       0.211000   -9999.000000   -9999.000000       0.394000
56184     56184     sichuan        103.1667       31.4333          114       133     2012      05        16        137              0.129500      13.126007       1.972220       0.282754       0.226000   -9999.000000   -9999.000000   -9999.000000
56184     56184     sichuan        103.1667       31.4333          114       133     2012      05        17        138              0.116583      10.472626       3.058004       0.286159       0.258000   -9999.000000       0.038000   -9999.000000
56184     56184     sichuan        103.1667       31.4333          114       133     2012      05        18        139              0.110792      15.437439       2.887212       0.280259   -9999.000000   -9999.000000       0.029000       0.432000
56184     56184     sichuan        103.1667       31.4333          114       133     2012      05        19        140              0.094750      15.604004       4.406205       0.283228   -9999.000000   -9999.000000       0.037800   -9999.000000
56184     56184     sichuan        103.1667       31.4333          114       133     2012      05        20        141              0.084208      18.550323       1.827938       0.280423       0.192000   -9999.000000       0.040300       0.339000
56184     56184     sichuan        103.1667       31.4333          114       133     2012      05        21        142              0.076458      18.937531       1.385086       0.275212       0.198500   -9999.000000   -9999.000000   -9999.000000
56184     56184     sichuan        103.1667       31.4333          114       133     2012      05        22        143              0.072250      17.684174       0.730110       0.271132       0.211000   -9999.000000       0.033800       0.714000
56184     56184     sichuan        103.1667       31.4333          114       133     2012      05        23        144              0.069042      14.211700       0.254915       0.269289   -9999.000000   -9999.000000       0.035200       0.491000
56184     56184     sichuan        103.1667       31.4333          114       133     2012      05        24        145              0.067417      15.643890       3.171064       0.265423   -9999.000000   -9999.000000       0.029600   -9999.000000
56184     56184     sichuan        103.1667       31.4333          114       133     2012      05        25        146              0.000000      12.366180       1.179192       0.269635       0.178000   -9999.000000       0.032500       0.447000
56184     56184     sichuan        103.1667       31.4333          114       133     2012      05        26        147              0.070458      13.272888       0.397227       0.276780       0.174500   -9999.000000   -9999.000000   -9999.000000
56184     56184     sichuan        103.1667       31.4333          114       133     2012      05        27        148              0.065333      17.455231       0.204299       0.263268       0.195000   -9999.000000   -9999.000000       0.422000
56184     56184     sichuan        103.1667       31.4333          114       133     2012      05        28        149              0.085833      15.225525      13.320339       0.261811       0.199000   -9999.000000   -9999.000000   -9999.000000
56184     56184     sichuan        103.1667       31.4333          114       133     2012      05        29        150              0.096292      15.532410       0.538110       0.288624   -9999.000000   -9999.000000       0.031900       0.627000
56184     56184     sichuan        103.1667       31.4333          114       133     2012      05        30        151              0.081083      16.152954       2.287503       0.287002       0.176000   -9999.000000       0.032300   -9999.000000
56184     56184     sichuan        103.1667       31.4333          114       133     2012      05        31        152              0.086708      15.682526       4.608208       0.281000       0.195500   -9999.000000       0.034700   -9999.000000
56184     56184     sichuan        103.1667       31.4333          114       133     2012      06        01        153              0.081750      12.252289       0.029644       0.289938       0.250000   -9999.000000   -9999.000000       0.583000
56184     56184     sichuan        103.1667       31.4333          114       133     2012      06        02        154              0.097167      16.096619      26.982786       0.278952       0.292000   -9999.000000   -9999.000000   -9999.000000
56184     56184     sichuan        103.1667       31.4333          114       133     2012      06        03        155              0.148208      12.589783      11.357337       0.309656   -9999.000000   -9999.000000   -9999.000000       0.638000
56184     56184     sichuan        103.1667       31.4333          114       133     2012      06        04        156              0.139583      11.207336       1.160957       0.327871       0.236000   -9999.000000       0.026200   -9999.000000
56184     56184     sichuan        103.1667       31.4333          114       133     2012      06        05        157              0.125500      12.108734       8.792143       0.310268       0.210000   -9999.000000       0.026100   -9999.000000
56184     56184     sichuan        103.1667       31.4333          114       133     2012      06        06        158              0.143417      14.862152       8.534252       0.307877       0.271000   -9999.000000       0.029700       1.000000
56184     56184     sichuan        103.1667       31.4333          114       133     2012      06        07        159              0.137208      13.236206       3.692312       0.318616       0.268000   -9999.000000   -9999.000000   -9999.000000
56184     56184     sichuan        103.1667       31.4333          114       133     2012      06        08        160              0.129250      15.150391       4.375257       0.307191   -9999.000000   -9999.000000       0.027000       0.863000
56184     56184     sichuan        103.1667       31.4333          114       133     2012      06        09        161              0.139042      14.566864      24.894121       0.307552   -9999.000000   -9999.000000       0.027400   -9999.000000
56184     56184     sichuan        103.1667       31.4333          114       133     2012      06        10        162              0.147292      14.592133       3.047840       0.322627       0.229000   -9999.000000       0.025400   -9999.000000
56184     56184     sichuan        103.1667       31.4333          114       133     2012      06        11        163              0.000000      13.103790       0.571737       0.319465       0.231000   -9999.000000       0.032900       0.819000
56184     56184     sichuan        103.1667       31.4333          114       133     2012      06        12        164              0.132875      12.295135       0.241440       0.307457       0.249000   -9999.000000   -9999.000000   -9999.000000
56184     56184     sichuan        103.1667       31.4333          114       133     2012      06        13        165              0.137375      13.081085       4.985512       0.297603   -9999.000000   -9999.000000   -9999.000000       1.000000
56184     56184     sichuan        103.1667       31.4333          114       133     2012      06        14        166              0.134708      14.433533       0.268632       0.301732       0.198000   -9999.000000       0.029700   -9999.000000
56184     56184     sichuan        103.1667       31.4333          114       133     2012      06        15        167              0.140792      14.540344       5.856155       0.295122       0.214000   -9999.000000       0.031400   -9999.000000
56184     56184     sichuan        103.1667       31.4333          114       133     2012      06        16        168              0.147750      13.145264       4.172225       0.301998       0.210000   -9999.000000       0.032900       0.930000
56184     56184     sichuan        103.1667       31.4333          114       133     2012      06        17        169              0.133667      11.844574       5.742774       0.304664       0.249500   -9999.000000       0.033200   -9999.000000
56184     56184     sichuan        103.1667       31.4333          114       133     2012      06        18        170              0.130042      15.023285       0.868225       0.302484       0.260000   -9999.000000   -9999.000000       0.728000
56184     56184     sichuan        103.1667       31.4333          114       133     2012      06        19        171              0.129292      14.743958       2.209895       0.299316   -9999.000000   -9999.000000   -9999.000000   -9999.000000
56184     56184     sichuan        103.1667       31.4333          114       133     2012      06        20        172              0.125417      15.540039       0.486453       0.295418       0.205000   -9999.000000       0.053100       0.868000
56184     56184     sichuan        103.1667       31.4333          114       133     2012      06        21        173              0.117833      14.636200       0.516131       0.289874       0.201000   -9999.000000       0.051700   -9999.000000
56184     56184     sichuan        103.1667       31.4333          114       133     2012      06        22        174              0.115958      14.627777       1.839415       0.286019       0.189000   -9999.000000       0.056900   -9999.000000
56184     56184     sichuan        103.1667       31.4333          114       133     2012      06        23        175              0.104792      14.738129       0.000000       0.287782       0.228000   -9999.000000       0.051200       0.537000
56184     56184     sichuan        103.1667       31.4333          114       133     2012      06        24        176              0.099625      17.511383       1.123587       0.279612   -9999.000000   -9999.000000   -9999.000000   -9999.000000
56184     56184     sichuan        103.1667       31.4333          114       133     2012      06        25        177              0.093458      14.933441       3.302869       0.280925       0.204000   -9999.000000       0.028200       1.000000
56184     56184     sichuan        103.1667       31.4333          114       133     2012      06        26        178              0.089542      16.096069       1.022092       0.286354       0.210000   -9999.000000       0.028200   -9999.000000
56184     56184     sichuan        103.1667       31.4333          114       133     2012      06        27        179              0.083250      15.859894       3.345543       0.287432       0.208500   -9999.000000       0.026200       0.837000
56184     56184     sichuan        103.1667       31.4333          114       133     2012      06        28        180              0.077708      16.803345       0.231852       0.288225       0.246000   -9999.000000       0.028100       0.763000
56184     56184     sichuan        103.1667       31.4333          114       133     2012      06        29        181              0.074333      17.333893      14.412138       0.285125   -9999.000000   -9999.000000   -9999.000000   -9999.000000
56184     56184     sichuan        103.1667       31.4333          114       133     2012      06        30        182              0.073458      17.314606       0.704710       0.305913       0.194000   -9999.000000   -9999.000000   -9999.000000
56184     56184     sichuan        103.1667       31.4333          114       133     2012      07        01        183              0.074042      15.948090      14.859031       0.300032   -9999.000000   -9999.000000       0.027500   -9999.000000
56184     56184     sichuan        103.1667       31.4333          114       133     2012      07        02        184              0.094000      17.522583       4.665536       0.312381       0.222000   -9999.000000       0.035600       1.000000
56184     56184     sichuan        103.1667       31.4333          114       133     2012      07        03        185              0.100583      16.542999      13.911450       0.314954       0.283000   -9999.000000       0.036000   -9999.000000
56184     56184     sichuan        103.1667       31.4333          114       133     2012      07        04        186              0.110417      16.322754       0.503301       0.316692   -9999.000000   -9999.000000       0.034100   -9999.000000
56184     56184     sichuan        103.1667       31.4333          114       133     2012      07        05        187              0.093250      17.008850       0.000000       0.307008   -9999.000000   -9999.000000   -9999.000000       0.707000
56184     56184     sichuan        103.1667       31.4333          114       133     2012      07        06        188              0.100958      18.713440      15.328745       0.294323   -9999.000000   -9999.000000   -9999.000000   -9999.000000
56184     56184     sichuan        103.1667       31.4333          114       133     2012      07        07        189              0.105125      17.763031       1.207759       0.314324   -9999.000000   -9999.000000       0.034200       0.975000
56184     56184     sichuan        103.1667       31.4333          114       133     2012      07        08        190              0.109375      17.335663      10.839721       0.306999       0.244000   -9999.000000       0.033000   -9999.000000
56184     56184     sichuan        103.1667       31.4333          114       133     2012      07        09        191              0.133375      18.570312      16.361792       0.314155       0.261000   -9999.000000       0.028500   -9999.000000
56184     56184     sichuan        103.1667       31.4333          114       133     2012      07        10        192              0.137208      18.426178       0.692172       0.324265   -9999.000000   -9999.000000   -9999.000000       0.932000
56184     56184     sichuan        103.1667       31.4333          114       133     2012      07        11        193              0.124292      17.985565       1.599834       0.311919       0.234000   -9999.000000   -9999.000000   -9999.000000
56184     56184     sichuan        103.1667       31.4333          114       133     2012      07        12        194              0.119333      16.567596       2.903012       0.303288       0.249500   -9999.000000       0.036300       0.929000
56184     56184     sichuan        103.1667       31.4333          114       133     2012      07        13        195              0.106917      15.301239       0.000000       0.304808       0.250500   -9999.000000       0.034700   -9999.000000
56184     56184     sichuan        103.1667       31.4333          114       133     2012      07        14        196              0.130292      18.682159      12.991889       0.294956   -9999.000000   -9999.000000       0.035800   -9999.000000
56184     56184     sichuan        103.1667       31.4333          114       133     2012      07        15        197              0.132000      15.422119       0.172898       0.317386   -9999.000000   -9999.000000       0.039200       0.911000
56184     56184     sichuan        103.1667       31.4333          114       133     2012      07        16        198              0.122542      15.346130       0.251495       0.304242       0.269000   -9999.000000   -9999.000000   -9999.000000
56184     56184     sichuan        103.1667       31.4333          114       133     2012      07        17        199              0.113958      15.476959       6.195249       0.298361       0.271500   -9999.000000   -9999.000000       1.000000
56184     56184     sichuan        103.1667       31.4333          114       133     2012      07        18        200              0.106750      15.455627       2.683828       0.306456       0.275500   -9999.000000       0.029400   -9999.000000
56184     56184     sichuan        103.1667       31.4333          114       133     2012      07        19        201              0.105125      15.904602      11.559998       0.303212       0.299000   -9999.000000       0.028500       0.949000
56184     56184     sichuan        103.1667       31.4333          114       133     2012      07        20        202              0.099292      16.018890       0.099386       0.316557       0.314000   -9999.000000       0.028100   -9999.000000
56184     56184     sichuan        103.1667       31.4333          114       133     2012      07        21        203              0.121957      16.566925      22.654615       0.308545   -9999.000000   -9999.000000       0.028700   -9999.000000
56184     56184     sichuan        103.1667       31.4333          114       133     2012      07        22        204              0.141167      17.237671       0.493789       0.326214       0.382000   -9999.000000   -9999.000000       0.905000
56184     56184     sichuan        103.1667       31.4333          114       133     2012      07        23        205              0.140375      15.834137       5.028899       0.314601       0.420000   -9999.000000   -9999.000000   -9999.000000
56184     56184     sichuan        103.1667       31.4333          114       133     2012      07        24        206              0.136458      14.971619       2.234795       0.313047       0.421000   -9999.000000       0.046600       0.947000
56184     56184     sichuan        103.1667       31.4333          114       133     2012      07        25        207              0.119958      16.483978       0.000000       0.305476       0.416000   -9999.000000       0.043200   -9999.000000
56184     56184     sichuan        103.1667       31.4333          114       133     2012      07        26        208              0.105833      18.754883       2.485485       0.297551   -9999.000000   -9999.000000       0.045800       0.567000
56184     56184     sichuan        103.1667       31.4333          114       133     2012      07        27        209              0.099625      19.185425       3.804644       0.293397       0.367000   -9999.000000   -9999.000000       0.764000
56184     56184     sichuan        103.1667       31.4333          114       133     2012      07        28        210              0.093667      17.318542       0.515083       0.300686       0.335500   -9999.000000   -9999.000000   -9999.000000
56184     56184     sichuan        103.1667       31.4333          114       133     2012      07        29        211              0.085917      19.466492       0.000000       0.292685       0.339000   -9999.000000       0.042900       0.726000
56184     56184     sichuan        103.1667       31.4333          114       133     2012      07        30        212              0.081333      20.382324       1.168881       0.286482       0.352000   -9999.000000       0.040300   -9999.000000
56184     56184     sichuan        103.1667       31.4333          114       133     2012      07        31        213              0.081500      18.881073      20.034611       0.288624       0.491000   -9999.000000       0.039400       1.000000
56184     56184     sichuan        103.1667       31.4333          114       133     2012      08        01        214              0.102958      16.235565       4.459320       0.311188   -9999.000000   -9999.000000       0.041400   -9999.000000
56184     56184     sichuan        103.1667       31.4333          114       133     2012      08        02        215              0.092167      15.990875       0.974396       0.319183       0.349000   -9999.000000   -9999.000000   -9999.000000
56184     56184     sichuan        103.1667       31.4333          114       133     2012      08        03        216              0.082208      18.152130       0.029735       0.302490       0.363500   -9999.000000   -9999.000000       0.663000
56184     56184     sichuan        103.1667       31.4333          114       133     2012      08        04        217              0.076750      19.224213       0.121542       0.295306       0.416000   -9999.000000       0.042900   -9999.000000
56184     56184     sichuan        103.1667       31.4333          114       133     2012      08        05        218              0.075042      18.932404       6.943872       0.291559       0.467000   -9999.000000       0.041800       0.896000
56184     56184     sichuan        103.1667       31.4333          114       133     2012      08        06        219              0.076000      17.398224       0.589142       0.304242   -9999.000000   -9999.000000       0.073500   -9999.000000
56184     56184     sichuan        103.1667       31.4333          114       133     2012      08        07        220              0.072125      17.959686       0.088406       0.297826       0.369000   -9999.000000       0.071500   -9999.000000
56184     56184     sichuan        103.1667       31.4333          114       133     2012      08        08        221              0.069083      19.641632       0.000000       0.290152       0.362500   -9999.000000   -9999.000000       0.707000
56184     56184     sichuan        103.1667       31.4333          114       133     2012      08        09        222              0.066250      20.511017       0.000000       0.284919       0.379000   -9999.000000       0.073300   -9999.000000
56184     56184     sichuan        103.1667       31.4333          114       133     2012      08        10        223              0.063750      20.264648       1.247219       0.281190       0.399000   -9999.000000       0.072700       0.569000
56184     56184     sichuan        103.1667       31.4333          114       133     2012      08        11        224              0.061875      21.168182       1.418628       0.276482   -9999.000000   -9999.000000       0.071600   -9999.000000
56184     56184     sichuan        103.1667       31.4333          114       133     2012      08        12        225              0.060208      22.218750       0.000000       0.272027       0.245000   -9999.000000       0.073000   -9999.000000
56184     56184     sichuan        103.1667       31.4333          114       133     2012      08        13        226              0.058875      22.096680       0.000000       0.268941       0.267000   -9999.000000   -9999.000000       0.637000
56184     56184     sichuan        103.1667       31.4333          114       133     2012      08        14        227              0.071458      21.318329      10.838393       0.266658       0.313000   -9999.000000   -9999.000000   -9999.000000
56184     56184     sichuan        103.1667       31.4333          114       133     2012      08        15        228              0.085417      20.436523       0.033282       0.293717       0.306500   -9999.000000       0.039100       0.518000
56184     56184     sichuan        103.1667       31.4333          114       133     2012      08        16        229              0.072583      19.972687       0.000000       0.288452       0.294000   -9999.000000       0.039300   -9999.000000
56184     56184     sichuan        103.1667       31.4333          114       133     2012      08        17        230              0.067125      21.166656       2.020626       0.277674   -9999.000000   -9999.000000       0.039400       0.691000
56184     56184     sichuan        103.1667       31.4333          114       133     2012      08        18        231              0.063542      20.618439       0.175343       0.276538       0.313000   -9999.000000       0.039600       0.553000
56184     56184     sichuan        103.1667       31.4333          114       133     2012      08        19        232              0.068000      20.540405      13.680257       0.274563       0.273000   -9999.000000   -9999.000000   -9999.000000
56184     56184     sichuan        103.1667       31.4333          114       133     2012      08        20        233              0.082417      18.405609       3.844943       0.297257       0.292500   -9999.000000   -9999.000000       0.533000
56184     56184     sichuan        103.1667       31.4333          114       133     2012      08        21        234              0.094333      19.016785      16.647636       0.301098   -9999.000000   -9999.000000       0.079900   -9999.000000
56184     56184     sichuan        103.1667       31.4333          114       133     2012      08        22        235              0.107792      14.810791       0.000000       0.323315   -9999.000000   -9999.000000       0.075900   -9999.000000
56184     56184     sichuan        103.1667       31.4333          114       133     2012      08        23        236              0.091833      14.185944       0.000000       0.305981       0.338000   -9999.000000       0.077300   -9999.000000
56184     56184     sichuan        103.1667       31.4333          114       133     2012      08        24        237              0.079875      17.290771       0.384504       0.293448       0.337000   -9999.000000       0.075200   -9999.000000
56184     56184     sichuan        103.1667       31.4333          114       133     2012      08        25        238              0.000000      17.097260      10.417077       0.288496       0.364500   -9999.000000   -9999.000000       0.741000
56184     56184     sichuan        103.1667       31.4333          114       133     2012      08        26        239              0.087167      16.489838       0.000000       0.308267       0.389000   -9999.000000       0.074700   -9999.000000
56184     56184     sichuan        103.1667       31.4333          114       133     2012      08        27        240              0.100167      18.731842      16.221550       0.293261       0.381000   -9999.000000       0.045000       1.000000
56184     56184     sichuan        103.1667       31.4333          114       133     2012      08        28        241              0.109458      17.167938       0.128835       0.313294   -9999.000000   -9999.000000       0.041800   -9999.000000
56184     56184     sichuan        103.1667       31.4333          114       133     2012      08        29        242              0.097750      15.474609       0.816585       0.305422       0.345000   -9999.000000       0.045100       0.686000
56184     56184     sichuan        103.1667       31.4333          114       133     2012      08        30        243              0.087417      16.250946       1.729067       0.297051       0.360000   -9999.000000   -9999.000000   -9999.000000
56184     56184     sichuan        103.1667       31.4333          114       133     2012      08        31        244              0.081083      17.051788       1.250836       0.294447       0.442500   -9999.000000   -9999.000000   -9999.000000
56184     56184     sichuan        103.1667       31.4333          114       133     2012      09        01        245              0.082125      16.113098       4.104233       0.295417       0.387000   -9999.000000       0.040500       0.678000
56184     56184     sichuan        103.1667       31.4333          114       133     2012      09        02        246              0.076333      16.510956       0.000000       0.301087   -9999.000000   -9999.000000       0.040500   -9999.000000
56184     56184     sichuan        103.1667       31.4333          114       133     2012      09        03        247              0.070917      16.565002       0.463281       0.289597       0.280000   -9999.000000       0.042300       0.482000
56184     56184     sichuan        103.1667       31.4333          114       133     2012      09        04        248              0.068208      15.078552       0.112911       0.287031       0.297000   -9999.000000       0.042900   -9999.000000
56184     56184     sichuan        103.1667       31.4333          114       133     2012      09        05        249              0.064583      16.822968       0.916048       0.281688       0.314500   -9999.000000   -9999.000000   -9999.000000
56184     56184     sichuan        103.1667       31.4333          114       133     2012      09        06        250              0.062000      17.078156       3.035319       0.280419       0.343000   -9999.000000   -9999.000000       0.629000
56184     56184     sichuan        103.1667       31.4333          114       133     2012      09        07        251              0.072458      18.367615       5.994899       0.285526   -9999.000000   -9999.000000       0.043800   -9999.000000
56184     56184     sichuan        103.1667       31.4333          114       133     2012      09        08        252              0.074958      17.748901       0.088100       0.295093       0.292000   -9999.000000       0.042500       0.559000
56184     56184     sichuan        103.1667       31.4333          114       133     2012      09        09        253              0.072125      18.227509      15.054598       0.287637       0.316000   -9999.000000       0.043900   -9999.000000
56184     56184     sichuan        103.1667       31.4333          114       133     2012      09        10        254              0.096667      18.324738       4.908786       0.305755       0.333500   -9999.000000       0.034700   -9999.000000
56184     56184     sichuan        103.1667       31.4333          114       133     2012      09        11        255              0.117708      17.092377       8.484619       0.310121       0.272000   -9999.000000   -9999.000000       1.000000
56184     56184     sichuan        103.1667       31.4333          114       133     2012      09        12        256              0.115917      16.761536       1.191006       0.309308       0.278000   -9999.000000       0.038000   -9999.000000
56184     56184     sichuan        103.1667       31.4333          114       133     2012      09        13        257              0.100208      13.735565       0.725917       0.307992   -9999.000000   -9999.000000       0.038500       0.349000
56184     56184     sichuan        103.1667       31.4333          114       133     2012      09        14        258              0.088292      13.537292       1.329137       0.295295       0.213000   -9999.000000       0.037600   -9999.000000
56184     56184     sichuan        103.1667       31.4333          114       133     2012      09        15        259              0.081958      13.334137       6.593098       0.290301       0.226000   -9999.000000       0.041800       0.921000
56184     56184     sichuan        103.1667       31.4333          114       133     2012      09        16        260              0.093375      12.060272       3.599010       0.299494       0.286000   -9999.000000   -9999.000000       0.720000
56184     56184     sichuan        103.1667       31.4333          114       133     2012      09        17        261              0.087167      11.364136       2.112966       0.308372       0.269000   -9999.000000   -9999.000000   -9999.000000
56184     56184     sichuan        103.1667       31.4333          114       133     2012      09        18        262              0.079500      13.611053       0.216531       0.299844   -9999.000000   -9999.000000       0.035900       0.560000
56184     56184     sichuan        103.1667       31.4333          114       133     2012      09        19        263              0.075625      11.665985       1.717433       0.293516       0.210000   -9999.000000       0.039500   -9999.000000
56184     56184     sichuan        103.1667       31.4333          114       133     2012      09        20        264              0.076083      14.279633       4.434917       0.291865       0.222500   -9999.000000       0.038000       1.000000
56184     56184     sichuan        103.1667       31.4333          114       133     2012      09        21        265              0.082083      13.351776       1.852428       0.299312   -9999.000000   -9999.000000       0.040400   -9999.000000
56184     56184     sichuan        103.1667       31.4333          114       133     2012      09        22        266              0.079833      12.329041       1.064561       0.298514       0.223500   -9999.000000   -9999.000000       0.795000
56184     56184     sichuan        103.1667       31.4333          114       133     2012      09        23        267              0.075458      14.083832       4.363083       0.295036       0.245000   -9999.000000   -9999.000000       0.605000
56184     56184     sichuan        103.1667       31.4333          114       133     2012      09        24        268              0.071667      13.732513       4.208588       0.291637   -9999.000000   -9999.000000       0.039100   -9999.000000
56184     56184     sichuan        103.1667       31.4333          114       133     2012      09        25        269              0.074708      13.246460      21.431696       0.296185   -9999.000000   -9999.000000       0.036200       1.000000
56184     56184     sichuan        103.1667       31.4333          114       133     2012      09        26        270              0.085000      12.679108       0.799548       0.327881       0.200500   -9999.000000       0.036300   -9999.000000
56184     56184     sichuan        103.1667       31.4333          114       133     2012      09        27        271              0.079214      13.660156       4.654398       0.311882       0.244500   -9999.000000   -9999.000000       0.804000
56184     56184     sichuan        103.1667       31.4333          114       133     2012      09        28        272              0.084933      12.411652       1.068884       0.309753       0.260000   -9999.000000   -9999.000000   -9999.000000
56184     56184     sichuan        103.1667       31.4333          114       133     2012      09        29        273              0.090167      12.646881       7.951030       0.302854   -9999.000000   -9999.000000       0.034900   -9999.000000
56184     56184     sichuan        103.1667       31.4333          114       133     2012      09        30        274              0.087917      11.555389       2.647201       0.312135       0.197000   -9999.000000       0.035100       0.769000
56184     56184     sichuan        103.1667       31.4333          114       133     2012      10        01        275              0.079625      13.069550       0.391335       0.307207       0.198500   -9999.000000       0.035300   -9999.000000
56184     56184     sichuan        103.1667       31.4333          114       133     2012      10        02        276              0.076667      13.266388       4.896338       0.300879       0.204000   -9999.000000       0.035300       0.799000
56184     56184     sichuan        103.1667       31.4333          114       133     2012      10        03        277              0.090667      12.667786       9.717328       0.302550       0.223000   -9999.000000   -9999.000000   -9999.000000
56184     56184     sichuan        103.1667       31.4333          114       133     2012      10        04        278              0.110958      12.170227       9.507974       0.316591   -9999.000000   -9999.000000   -9999.000000   -9999.000000
56184     56184     sichuan        103.1667       31.4333          114       133     2012      10        05        279              0.115917      10.487122       2.441274       0.320643   -9999.000000   -9999.000000       0.034700       0.736000
56184     56184     sichuan        103.1667       31.4333          114       133     2012      10        06        280              0.105083       9.827209       3.742222       0.313864       0.193000   -9999.000000       0.036400   -9999.000000
56184     56184     sichuan        103.1667       31.4333          114       133     2012      10        07        281              0.097750      10.213379       2.497889       0.309972       0.200000   -9999.000000       0.035300       0.741000
56184     56184     sichuan        103.1667       31.4333          114       133     2012      10        08        282              0.110958      11.754456      10.785483       0.308400       0.214000   -9999.000000       0.032200   -9999.000000
56184     56184     sichuan        103.1667       31.4333          114       133     2012      10        09        283              0.133250      11.583893       5.904047       0.315888       0.244000   -9999.000000   -9999.000000   -9999.000000
56184     56184     sichuan        103.1667       31.4333          114       133     2012      10        10        284              0.138708       9.300903      17.121613       0.318217   -9999.000000   -9999.000000       0.031600       0.731000
56184     56184     sichuan        103.1667       31.4333          114       133     2012      10        11        285              0.147083       8.289276      14.640662       0.328455   -9999.000000   -9999.000000       0.032000   -9999.000000
56184     56184     sichuan        103.1667       31.4333          114       133     2012      10        12        286              0.149833       9.020844       9.071306       0.330636       0.213000   -9999.000000       0.028900       0.568000
56184     56184     sichuan        103.1667       31.4333          114       133     2012      10        13        287              0.142833       8.522217       3.069516       0.329841       0.244000   -9999.000000       0.032300   -9999.000000
56184     56184     sichuan        103.1667       31.4333          114       133     2012      10        14        288              0.134417       9.202515       4.310573       0.320853       0.223000   -9999.000000   -9999.000000       0.493000
56184     56184     sichuan        103.1667       31.4333          114       133     2012      10        15        289              0.126208      10.769623       3.896606       0.318789   -9999.000000   -9999.000000   -9999.000000       0.603000
56184     56184     sichuan        103.1667       31.4333          114       133     2012      10        16        290              0.120000      11.573578       1.246171       0.317275   -9999.000000   -9999.000000       0.038100   -9999.000000
56184     56184     sichuan        103.1667       31.4333          114       133     2012      10        17        291              0.111591      10.738159       0.929537       0.311879       0.177000   -9999.000000       0.031200       0.310000
56184     56184     sichuan        103.1667       31.4333          114       133     2012      10        18        292              0.105333       9.880035       2.015823       0.308495       0.197000   -9999.000000       0.044100   -9999.000000
56184     56184     sichuan        103.1667       31.4333          114       133     2012      10        19        293              0.100958      11.391083       0.847729       0.307008       0.220000   -9999.000000       0.037200       0.561000
56184     56184     sichuan        103.1667       31.4333          114       133     2012      10        20        294              0.096583      10.998108       0.648203       0.304842       0.223000   -9999.000000   -9999.000000   -9999.000000
56184     56184     sichuan        103.1667       31.4333          114       133     2012      10        21        295              0.090875      11.335358       2.838824       0.302033   -9999.000000   -9999.000000   -9999.000000       0.239000
56184     56184     sichuan        103.1667       31.4333          114       133     2012      10        22        296              0.086583      11.397003       0.564515       0.304248   -9999.000000   -9999.000000       0.048000       0.248000
56184     56184     sichuan        103.1667       31.4333          114       133     2012      10        23        297              0.088167       9.526794       7.338679       0.302329   -9999.000000   -9999.000000       0.045000   -9999.000000
56184     56184     sichuan        103.1667       31.4333          114       133     2012      10        24        298              0.108167       9.268982       2.995269       0.310319   -9999.000000   -9999.000000       0.047500       0.515000
56184     56184     sichuan        103.1667       31.4333          114       133     2012      10        25        299              0.000000       7.374847       2.078165       0.312933       0.227000   -9999.000000       0.044000   -9999.000000
56184     56184     sichuan        103.1667       31.4333          114       133     2012      10        26        300              0.099792       7.986847       0.495344       0.306823   -9999.000000   -9999.000000   -9999.000000       0.350000
56184     56184     sichuan        103.1667       31.4333          114       133     2012      10        27        301              0.093125       9.088806       0.193733       0.302393   -9999.000000   -9999.000000       0.038600   -9999.000000
56184     56184     sichuan        103.1667       31.4333          114       133     2012      10        28        302              0.000000       9.232422       2.073539       0.298795       0.191000   -9999.000000       0.046800   -9999.000000
56184     56184     sichuan        103.1667       31.4333          114       133     2012      10        29        303              0.112250      10.381134      21.709599       0.301454   -9999.000000   -9999.000000       0.039300       0.507000
56184     56184     sichuan        103.1667       31.4333          114       133     2012      10        30        304              0.137708       8.808655       3.098348       0.322904   -9999.000000   -9999.000000       0.035800   -9999.000000
56184     56184     sichuan        103.1667       31.4333          114       133     2012      10        31        305              0.129000       6.487091       4.423557       0.321160   -9999.000000   -9999.000000   -9999.000000       0.240000
56184     56184     sichuan        103.1667       31.4333          114       133     2012      11        01        306              0.124042       6.922852       0.130045       0.316597   -9999.000000   -9999.000000   -9999.000000   -9999.000000
56184     56184     sichuan        103.1667       31.4333          114       133     2012      11        02        307              0.117500       6.811310       0.191578       0.303642   -9999.000000   -9999.000000       0.042100   -9999.000000
56184     56184     sichuan        103.1667       31.4333          114       133     2012      11        03        308              0.111583       7.489319       2.390338       0.298809       0.234000   -9999.000000       0.034200       0.297000
56184     56184     sichuan        103.1667       31.4333          114       133     2012      11        04        309              0.106208       6.718231       1.522909       0.299206       0.265000   -9999.000000       0.043800   -9999.000000
56184     56184     sichuan        103.1667       31.4333          114       133     2012      11        05        310              0.101750       6.719086       7.149239       0.298512       0.267000   -9999.000000       0.044400       0.128000
56184     56184     sichuan        103.1667       31.4333          114       133     2012      11        06        311              0.098375       6.780762       5.457564       0.311375   -9999.000000   -9999.000000   -9999.000000   -9999.000000
56184     56184     sichuan        103.1667       31.4333          114       133     2012      11        07        312              0.096792       5.739929       7.142051       0.309535   -9999.000000   -9999.000000   -9999.000000   -9999.000000
56184     56184     sichuan        103.1667       31.4333          114       133     2012      11        08        313              0.100458       4.912994       8.444808       0.307712       0.232000   -9999.000000       0.051600       0.403000
56184     56184     sichuan        103.1667       31.4333          114       133     2012      11        09        314              0.097833       5.467590       1.133375       0.314354       0.302000   -9999.000000       0.043000   -9999.000000
56184     56184     sichuan        103.1667       31.4333          114       133     2012      11        10        315              0.094167       6.377655       4.539754       0.304008       0.269000   -9999.000000       0.045700       0.160000
56184     56184     sichuan        103.1667       31.4333          114       133     2012      11        11        316              0.091125       6.334869       3.054471       0.301623   -9999.000000   -9999.000000   -9999.000000   -9999.000000
56184     56184     sichuan        103.1667       31.4333          114       133     2012      11        12        317              0.088750       5.590973       1.119616       0.304804   -9999.000000   -9999.000000   -9999.000000       0.321000
56184     56184     sichuan        103.1667       31.4333          114       133     2012      11        13        318              0.000000       5.668121       0.598879       0.296161       0.189000   -9999.000000       0.067400   -9999.000000
56184     56184     sichuan        103.1667       31.4333          114       133     2012      11        14        319              0.085083       5.607178       0.757485       0.289555       0.181000   -9999.000000       0.070600   -9999.000000
56184     56184     sichuan        103.1667       31.4333          114       133     2012      11        15        320              0.090250       5.820587       5.537980       0.291043       0.235000   -9999.000000       0.060300       0.106000
56184     56184     sichuan        103.1667       31.4333          114       133     2012      11        16        321              0.107500       6.236603       2.913948       0.299768   -9999.000000   -9999.000000       0.055000   -9999.000000
56184     56184     sichuan        103.1667       31.4333          114       133     2012      11        17        322              0.000000       4.723938       1.343873       0.294079   -9999.000000   -9999.000000   -9999.000000       0.307000
56184     56184     sichuan        103.1667       31.4333          114       133     2012      11        18        323              0.096292       4.403717       0.714772       0.285809   -9999.000000   -9999.000000   -9999.000000   -9999.000000
56184     56184     sichuan        103.1667       31.4333          114       133     2012      11        19        324              0.094792       4.839966       0.215391       0.288182       0.185000   -9999.000000       0.079000       0.032000
56184     56184     sichuan        103.1667       31.4333          114       133     2012      11        20        325              0.092792       5.282959       0.197703       0.289463       0.221000   -9999.000000       0.064100       0.056000
56184     56184     sichuan        103.1667       31.4333          114       133     2012      11        21        326              0.090833       5.248627       1.904526       0.288852       0.214000   -9999.000000       0.082900   -9999.000000
56184     56184     sichuan        103.1667       31.4333          114       133     2012      11        22        327              0.091167       6.025940       8.225816       0.292935   -9999.000000   -9999.000000       0.064700       0.003000
56184     56184     sichuan        103.1667       31.4333          114       133     2012      11        23        328              0.091917       3.262848       0.000000       0.276152   -9999.000000   -9999.000000   -9999.000000   -9999.000000
56184     56184     sichuan        103.1667       31.4333          114       133     2012      11        24        329              0.089667       3.068054       0.413634       0.265227       0.168000   -9999.000000   -9999.000000       0.017000
56184     56184     sichuan        103.1667       31.4333          114       133     2012      11        25        330              0.090625       3.489044       0.575326       0.268492   -9999.000000   -9999.000000       0.077800   -9999.000000
56184     56184     sichuan        103.1667       31.4333          114       133     2012      11        26        331              0.095833       1.511719       0.064266       0.234160   -9999.000000   -9999.000000       0.056400   -9999.000000
56184     56184     sichuan        103.1667       31.4333          114       133     2012      11        27        332              0.093708       1.389618       1.719675       0.222711   -9999.000000   -9999.000000       0.043300       0.129000
56184     56184     sichuan        103.1667       31.4333          114       133     2012      11        28        333              0.098917       2.339905       0.000000       0.239077   -9999.000000   -9999.000000   -9999.000000   -9999.000000
56184     56184     sichuan        103.1667       31.4333          114       133     2012      11        29        334              0.097250       2.115387       0.515716       0.234770   -9999.000000   -9999.000000   -9999.000000       0.019000
56184     56184     sichuan        103.1667       31.4333          114       133     2012      11        30        335              0.094750       3.146210       1.704981       0.250880   -9999.000000   -9999.000000       0.057600   -9999.000000
56184     56184     sichuan        103.1667       31.4333          114       133     2012      12        01        336              0.094792       2.859497       0.714361       0.248576   -9999.000000   -9999.000000       0.058700   -9999.000000
56184     56184     sichuan        103.1667       31.4333          114       133     2012      12        02        337              0.094000       1.900116       0.687859       0.232560   -9999.000000   -9999.000000       0.058500       0.308000
56184     56184     sichuan        103.1667       31.4333          114       133     2012      12        03        338              0.092458       2.768829       3.826310       0.240640   -9999.000000   -9999.000000       0.052300   -9999.000000
56184     56184     sichuan        103.1667       31.4333          114       133     2012      12        04        339              0.088875       2.775238       3.718052       0.245502   -9999.000000   -9999.000000   -9999.000000       0.240000
56184     56184     sichuan        103.1667       31.4333          114       133     2012      12        05        340              0.082500       1.740509       1.256994       0.225466   -9999.000000   -9999.000000   -9999.000000   -9999.000000
56184     56184     sichuan        103.1667       31.4333          114       133     2012      12        06        341              0.075458       1.689362       0.000000       0.220294   -9999.000000   -9999.000000       0.071200   -9999.000000
56184     56184     sichuan        103.1667       31.4333          114       133     2012      12        07        342              0.063500       2.171722       0.187055       0.231256   -9999.000000   -9999.000000       0.053200       0.123000
56184     56184     sichuan        103.1667       31.4333          114       133     2012      12        08        343              0.076167       1.820190       0.578130       0.224582   -9999.000000   -9999.000000       0.052900   -9999.000000
56184     56184     sichuan        103.1667       31.4333          114       133     2012      12        09        344              0.091250       2.384796       4.390788       0.233740   -9999.000000   -9999.000000       0.053500       0.019000
56184     56184     sichuan        103.1667       31.4333          114       133     2012      12        10        345              0.091375       3.037689       3.166143       0.256204   -9999.000000   -9999.000000   -9999.000000   -9999.000000
56184     56184     sichuan        103.1667       31.4333          114       133     2012      12        11        346              0.089125       2.491180       5.236240       0.245514       0.169000   -9999.000000       0.040900       0.090000
56184     56184     sichuan        103.1667       31.4333          114       133     2012      12        12        347              0.087875       2.111969      12.378526       0.232736       0.209000   -9999.000000       0.058500   -9999.000000
56184     56184     sichuan        103.1667       31.4333          114       133     2012      12        13        348              0.086458       2.629395      10.845553       0.259439   -9999.000000   -9999.000000       0.042300   -9999.000000
56184     56184     sichuan        103.1667       31.4333          114       133     2012      12        14        349              0.084042       2.464874      12.188424       0.244989   -9999.000000   -9999.000000       0.039800       0.076000
56184     56184     sichuan        103.1667       31.4333          114       133     2012      12        15        350              0.000000       1.679474       6.012953       0.222488   -9999.000000   -9999.000000   -9999.000000   -9999.000000
56184     56184     sichuan        103.1667       31.4333          114       133     2012      12        16        351              0.076583       1.878296       2.070654       0.212931       0.176000   -9999.000000   -9999.000000       0.289000
56184     56184     sichuan        103.1667       31.4333          114       133     2012      12        17        352              0.082583       2.284912       2.494668       0.220827   -9999.000000   -9999.000000       0.048500   -9999.000000
56184     56184     sichuan        103.1667       31.4333          114       133     2012      12        18        353              0.082458       2.108643       2.822307       0.227053   -9999.000000   -9999.000000       0.033600       0.094000
56184     56184     sichuan        103.1667       31.4333          114       133     2012      12        19        354              0.080875       2.232452       0.000000       0.226673   -9999.000000   -9999.000000       0.049800       0.069000
56184     56184     sichuan        103.1667       31.4333          114       133     2012      12        20        355              0.000000       1.578217       1.869356       0.219297   -9999.000000   -9999.000000       0.036400   -9999.000000
56184     56184     sichuan        103.1667       31.4333          114       133     2012      12        21        356              0.079000       0.732178       0.860102       0.202665   -9999.000000   -9999.000000   -9999.000000       0.011000
56184     56184     sichuan        103.1667       31.4333          114       133     2012      12        22        357              0.079208       1.157349       2.826598       0.206178   -9999.000000   -9999.000000   -9999.000000   -9999.000000
56184     56184     sichuan        103.1667       31.4333          114       133     2012      12        23        358              0.069708       0.271576       2.417081       0.184597   -9999.000000   -9999.000000       0.049200       0.047000
56184     56184     sichuan        103.1667       31.4333          114       133     2012      12        24        359              0.042158      -0.054108       1.798753       0.173960   -9999.000000   -9999.000000       0.042100   -9999.000000
56184     56184     sichuan        103.1667       31.4333          114       133     2012      12        25        360              0.041208       0.292847       0.000000       0.178460   -9999.000000   -9999.000000       0.038600   -9999.000000
56184     56184     sichuan        103.1667       31.4333          114       133     2012      12        26        361              0.000000       0.101776       0.116291       0.174093   -9999.000000   -9999.000000   -9999.000000       0.023000
56184     56184     sichuan        103.1667       31.4333          114       133     2012      12        27        362              0.031455       0.154755       0.265183       0.180536   -9999.000000   -9999.000000   -9999.000000   -9999.000000
56184     56184     sichuan        103.1667       31.4333          114       133     2012      12        28        363              0.026000       0.141510       0.400286       0.178136   -9999.000000   -9999.000000       0.050100       0.012000
56184     56184     sichuan        103.1667       31.4333          114       133     2012      12        29        364              0.000000       0.301636       0.000000       0.183180   -9999.000000   -9999.000000       0.055400   -9999.000000
56184     56184     sichuan        103.1667       31.4333          114       133     2012      12        30        365              0.000000      -1.556946       0.000000       0.151917   -9999.000000   -9999.000000       0.037000   -9999.000000
56184     56184     sichuan        103.1667       31.4333          114       133     2012      12        31        366              0.026867      -1.502380       0.000000       0.149814   -9999.000000   -9999.000000       0.032100       0.154000
