# Supplementary material for: Research on Fusing Multisatellite Soil Moisture Data Based on Bayesian Model Averaging
Source: Hindawi journal article supplement (doi:10.1155/2018/9310838), 2018-06-25
Supplement: f1 [file 9310838.f1.zip › 2012_sm00-10cm_daily_ZDB_ZHY_56185_366days_allin.txt]

56185     56185     sichuan        103.6333       32.1333          111       135     2012      01        01        001              0.000000   -9999.000000       7.334233   -9999.000000       0.183000   -9999.000000   -9999.000000   -9999.000000
56185     56185     sichuan        103.6333       32.1333          111       135     2012      01        02        002              0.110750      -1.610626       0.713006       0.132386   -9999.000000   -9999.000000       0.037100   -9999.000000
56185     56185     sichuan        103.6333       32.1333          111       135     2012      01        03        003              0.000000      -1.888641       1.837409       0.125170   -9999.000000   -9999.000000       0.049300       0.018000
56185     56185     sichuan        103.6333       32.1333          111       135     2012      01        04        004              0.112125      -3.067932       0.228527       0.106526   -9999.000000   -9999.000000       0.036300   -9999.000000
56185     56185     sichuan        103.6333       32.1333          111       135     2012      01        05        005              0.112167      -2.343597       0.228530       0.119588   -9999.000000   -9999.000000       0.043100   -9999.000000
56185     56185     sichuan        103.6333       32.1333          111       135     2012      01        06        006              0.112000      -2.812500      19.527557       0.112209   -9999.000000   -9999.000000   -9999.000000       0.028000
56185     56185     sichuan        103.6333       32.1333          111       135     2012      01        07        007              0.111292      -2.130005       1.737474       0.124437   -9999.000000   -9999.000000   -9999.000000   -9999.000000
56185     56185     sichuan        103.6333       32.1333          111       135     2012      01        08        008              0.000000      -2.063843       0.481942       0.126688   -9999.000000   -9999.000000       0.050500       0.047000
56185     56185     sichuan        103.6333       32.1333          111       135     2012      01        09        009              0.109958      -1.803528       4.048162       0.125770   -9999.000000   -9999.000000       0.056900   -9999.000000
56185     56185     sichuan        103.6333       32.1333          111       135     2012      01        10        010              0.111957      -1.329956       1.718942       0.136640   -9999.000000   -9999.000000   -9999.000000       0.024000
56185     56185     sichuan        103.6333       32.1333          111       135     2012      01        11        011              0.112125      -1.872803      11.757318       0.128475   -9999.000000   -9999.000000       0.042000       0.027000
56185     56185     sichuan        103.6333       32.1333          111       135     2012      01        12        012              0.111083      -2.013855       0.407721       0.124499   -9999.000000   -9999.000000   -9999.000000   -9999.000000
56185     56185     sichuan        103.6333       32.1333          111       135     2012      01        13        013              0.111458      -1.756775       2.093958       0.126318   -9999.000000   -9999.000000   -9999.000000       0.044000
56185     56185     sichuan        103.6333       32.1333          111       135     2012      01        14        014              0.110792      -1.437561       2.374436       0.134551   -9999.000000   -9999.000000       0.050900   -9999.000000
56185     56185     sichuan        103.6333       32.1333          111       135     2012      01        15        015              0.108500      -3.625458       0.000000       0.109397   -9999.000000   -9999.000000       0.037000       0.030000
56185     56185     sichuan        103.6333       32.1333          111       135     2012      01        16        016              0.103000      -3.504700       2.946983       0.105538       0.148000   -9999.000000       0.045200   -9999.000000
56185     56185     sichuan        103.6333       32.1333          111       135     2012      01        17        017              0.000000      -2.221252       5.256555       0.120029   -9999.000000   -9999.000000       0.040000   -9999.000000
56185     56185     sichuan        103.6333       32.1333          111       135     2012      01        18        018              0.101708      -2.558960       1.469724       0.119040   -9999.000000   -9999.000000   -9999.000000       0.043000
56185     56185     sichuan        103.6333       32.1333          111       135     2012      01        19        019              0.107083      -2.302917       1.088486       0.122500   -9999.000000   -9999.000000       0.041000   -9999.000000
56185     56185     sichuan        103.6333       32.1333          111       135     2012      01        20        020              0.110083      -1.654297     113.584961       0.131769   -9999.000000   -9999.000000       0.054000       0.016000
56185     56185     sichuan        103.6333       32.1333          111       135     2012      01        21        021              0.109542      -2.356201       0.430492       0.121502   -9999.000000   -9999.000000       0.035600   -9999.000000
56185     56185     sichuan        103.6333       32.1333          111       135     2012      01        22        022              0.109083      -3.145844       0.000000       0.111724   -9999.000000   -9999.000000       0.042400   -9999.000000
56185     56185     sichuan        103.6333       32.1333          111       135     2012      01        23        023              0.108375      -3.047424       0.000000       0.111637   -9999.000000   -9999.000000   -9999.000000       0.023000
56185     56185     sichuan        103.6333       32.1333          111       135     2012      01        24        024              0.107917      -1.855255       0.867736       0.130640   -9999.000000   -9999.000000   -9999.000000   -9999.000000
56185     56185     sichuan        103.6333       32.1333          111       135     2012      01        25        025              0.106583      -2.401276       0.000000       0.120359       0.169000   -9999.000000       0.048200       0.069000
56185     56185     sichuan        103.6333       32.1333          111       135     2012      01        26        026              0.106083      -1.700836       0.000000       0.133822       0.156000   -9999.000000       0.029800   -9999.000000
56185     56185     sichuan        103.6333       32.1333          111       135     2012      01        27        027              0.106375      -1.258331       0.000000       0.143617       0.161000   -9999.000000       0.053100   -9999.000000
56185     56185     sichuan        103.6333       32.1333          111       135     2012      01        28        028              0.106625      -0.717194       0.000000       0.147510       0.169000   -9999.000000       0.040400       0.038000
56185     56185     sichuan        103.6333       32.1333          111       135     2012      01        29        029              0.106500      -0.464142       0.000000       0.156664   -9999.000000   -9999.000000   -9999.000000   -9999.000000
56185     56185     sichuan        103.6333       32.1333          111       135     2012      01        30        030              0.106250      -0.941864       0.000000       0.143435   -9999.000000   -9999.000000   -9999.000000       0.069000
56185     56185     sichuan        103.6333       32.1333          111       135     2012      01        31        031              0.105625      -1.133087       0.000000       0.145853       0.160000   -9999.000000       0.061800   -9999.000000
56185     56185     sichuan        103.6333       32.1333          111       135     2012      02        01        032              0.105875      -0.516785       0.000000       0.155184       0.142000   -9999.000000       0.045100       0.096000
56185     56185     sichuan        103.6333       32.1333          111       135     2012      02        02        033              0.106875       0.025696       0.000000       0.162531   -9999.000000   -9999.000000       0.052200       0.078000
56185     56185     sichuan        103.6333       32.1333          111       135     2012      02        03        034              0.105875      -0.933136       0.000000       0.141470   -9999.000000   -9999.000000       0.051900   -9999.000000
56185     56185     sichuan        103.6333       32.1333          111       135     2012      02        04        035              0.106292      -0.778625       0.000000       0.147293   -9999.000000   -9999.000000   -9999.000000       0.199000
56185     56185     sichuan        103.6333       32.1333          111       135     2012      02        05        036              0.106000      -0.244995       0.000000       0.156935       0.164000   -9999.000000       0.060100   -9999.000000
56185     56185     sichuan        103.6333       32.1333          111       135     2012      02        06        037              0.105625       0.306610       0.000000       0.172761       0.133000   -9999.000000       0.054200       0.050000
56185     56185     sichuan        103.6333       32.1333          111       135     2012      02        07        038              0.105250       0.298279       0.000000       0.170557   -9999.000000   -9999.000000       0.033500   -9999.000000
56185     56185     sichuan        103.6333       32.1333          111       135     2012      02        08        039              0.104875       0.819458       0.100149       0.177809   -9999.000000   -9999.000000       0.047600       0.060000
56185     56185     sichuan        103.6333       32.1333          111       135     2012      02        09        040              0.103792       0.176086       3.376638       0.167050   -9999.000000   -9999.000000   -9999.000000   -9999.000000
56185     56185     sichuan        103.6333       32.1333          111       135     2012      02        10        041              0.102542      -0.948364       0.465405       0.148964   -9999.000000   -9999.000000   -9999.000000   -9999.000000
56185     56185     sichuan        103.6333       32.1333          111       135     2012      02        11        042              0.103250      -1.324738       0.000000       0.131128   -9999.000000   -9999.000000       0.053100       0.147000
56185     56185     sichuan        103.6333       32.1333          111       135     2012      02        12        043              0.103667      -0.198639       0.000000       0.158336   -9999.000000   -9999.000000       0.057900   -9999.000000
56185     56185     sichuan        103.6333       32.1333          111       135     2012      02        13        044              0.103417      -0.643463       0.000000       0.152290   -9999.000000   -9999.000000       0.056200       0.146000
56185     56185     sichuan        103.6333       32.1333          111       135     2012      02        14        045              0.103458      -0.230316       0.000000       0.158378   -9999.000000   -9999.000000   -9999.000000   -9999.000000
56185     56185     sichuan        103.6333       32.1333          111       135     2012      02        15        046              0.103565       0.424194       0.000000       0.171810   -9999.000000   -9999.000000   -9999.000000   -9999.000000
56185     56185     sichuan        103.6333       32.1333          111       135     2012      02        16        047              0.103542       0.680847       2.006246       0.176398       0.134000   -9999.000000   -9999.000000       0.025000
56185     56185     sichuan        103.6333       32.1333          111       135     2012      02        17        048              0.102917      -0.374023       0.000000       0.155221       0.122000   -9999.000000       0.052300   -9999.000000
56185     56185     sichuan        103.6333       32.1333          111       135     2012      02        18        049              0.102042      -0.386475       1.060803       0.156176   -9999.000000   -9999.000000       0.033600       0.040000
56185     56185     sichuan        103.6333       32.1333          111       135     2012      02        19        050              0.101917      -1.429932       0.868392       0.135459   -9999.000000   -9999.000000       0.044400   -9999.000000
56185     56185     sichuan        103.6333       32.1333          111       135     2012      02        20        051              0.101917      -0.329803       0.295801       0.157986   -9999.000000   -9999.000000       0.037900   -9999.000000
56185     56185     sichuan        103.6333       32.1333          111       135     2012      02        21        052              0.103391      -0.047302       0.569599       0.162138       0.114000   -9999.000000   -9999.000000       0.326000
56185     56185     sichuan        103.6333       32.1333          111       135     2012      02        22        053              0.103087       1.355743       0.095128       0.188525       0.119000   -9999.000000       0.049200   -9999.000000
56185     56185     sichuan        103.6333       32.1333          111       135     2012      02        23        054              0.102609       1.698242       0.302427       0.195659       0.105000   -9999.000000       0.054700       0.340000
56185     56185     sichuan        103.6333       32.1333          111       135     2012      02        24        055              0.102208       2.351715       0.000000       0.209089   -9999.000000   -9999.000000       0.036000   -9999.000000
56185     56185     sichuan        103.6333       32.1333          111       135     2012      02        25        056              0.101542       3.266632       0.301423       0.214579   -9999.000000   -9999.000000       0.046800       0.006000
56185     56185     sichuan        103.6333       32.1333          111       135     2012      02        26        057              0.100333       2.399292       0.094846       0.207960       0.117000   -9999.000000   -9999.000000       0.037000
56185     56185     sichuan        103.6333       32.1333          111       135     2012      02        27        058              0.099667       1.407654       2.654743       0.190023   -9999.000000   -9999.000000   -9999.000000   -9999.000000
56185     56185     sichuan        103.6333       32.1333          111       135     2012      02        28        059              0.100000       0.810852       0.257637       0.183781       0.122000   -9999.000000   -9999.000000       0.272000
56185     56185     sichuan        103.6333       32.1333          111       135     2012      02        29        060              0.000000   -9999.000000       0.000000   -9999.000000   -9999.000000   -9999.000000   -9999.000000   -9999.000000
56185     56185     sichuan        103.6333       32.1333          111       135     2012      03        01        061              0.099174       2.745758       0.588870       0.208332   -9999.000000   -9999.000000       0.060300       0.111000
56185     56185     sichuan        103.6333       32.1333          111       135     2012      03        02        062              0.100583       2.079437       1.763959       0.203651       0.130000   -9999.000000       0.049400       0.119000
56185     56185     sichuan        103.6333       32.1333          111       135     2012      03        03        063              0.101625       1.863312       1.340120       0.201770       0.120000   -9999.000000   -9999.000000   -9999.000000
56185     56185     sichuan        103.6333       32.1333          111       135     2012      03        04        064              0.101000       2.242676       0.913497       0.207917   -9999.000000   -9999.000000       0.041000       0.205000
56185     56185     sichuan        103.6333       32.1333          111       135     2012      03        05        065              0.100667       1.269440       0.000000       0.196027   -9999.000000   -9999.000000       0.061800   -9999.000000
56185     56185     sichuan        103.6333       32.1333          111       135     2012      03        06        066              0.099958       1.617310       0.673644       0.196970   -9999.000000   -9999.000000       0.042700       0.081000
56185     56185     sichuan        103.6333       32.1333          111       135     2012      03        07        067              0.000000       2.085754       2.144393       0.205039   -9999.000000   -9999.000000       0.053600   -9999.000000
56185     56185     sichuan        103.6333       32.1333          111       135     2012      03        08        068              0.098625       1.504028       2.810503       0.193940   -9999.000000   -9999.000000   -9999.000000       0.015000
56185     56185     sichuan        103.6333       32.1333          111       135     2012      03        09        069              0.099000       0.351257       1.589308       0.173604   -9999.000000   -9999.000000   -9999.000000       0.041000
56185     56185     sichuan        103.6333       32.1333          111       135     2012      03        10        070              0.098792       0.520172       1.658856       0.174797       0.119000   -9999.000000       0.056400   -9999.000000
56185     56185     sichuan        103.6333       32.1333          111       135     2012      03        11        071              0.098375       1.911041       0.462758       0.194143   -9999.000000   -9999.000000       0.061000       0.351000
56185     56185     sichuan        103.6333       32.1333          111       135     2012      03        12        072              0.097958       3.272003       0.632257       0.216708   -9999.000000   -9999.000000       0.067200   -9999.000000
56185     56185     sichuan        103.6333       32.1333          111       135     2012      03        13        073              0.096792       3.483643       1.527232       0.229454       0.118000   -9999.000000       0.061100       0.282000
56185     56185     sichuan        103.6333       32.1333          111       135     2012      03        14        074              0.095000       5.454834       5.770353       0.234885       0.116000   -9999.000000   -9999.000000   -9999.000000
56185     56185     sichuan        103.6333       32.1333          111       135     2012      03        15        075              0.094958       5.504608       0.446779       0.238954       0.113000   -9999.000000   -9999.000000   -9999.000000
56185     56185     sichuan        103.6333       32.1333          111       135     2012      03        16        076              0.095000       5.260681       1.335955       0.238105   -9999.000000   -9999.000000       0.057700       0.446000
56185     56185     sichuan        103.6333       32.1333          111       135     2012      03        17        077              0.000000       3.791870       1.213240       0.231327   -9999.000000   -9999.000000       0.041300   -9999.000000
56185     56185     sichuan        103.6333       32.1333          111       135     2012      03        18        078              0.000000       5.645264       0.247967       0.228192       0.122000   -9999.000000       0.070300       0.483000
56185     56185     sichuan        103.6333       32.1333          111       135     2012      03        19        079              0.000000       7.034302       0.230069       0.234179       0.118000   -9999.000000       0.059000   -9999.000000
56185     56185     sichuan        103.6333       32.1333          111       135     2012      03        20        080              0.000000       7.412964       0.124135       0.237001       0.110000   -9999.000000   -9999.000000   -9999.000000
56185     56185     sichuan        103.6333       32.1333          111       135     2012      03        21        081              0.000000       9.122345       0.389130       0.237304   -9999.000000   -9999.000000       0.055200       0.569000
56185     56185     sichuan        103.6333       32.1333          111       135     2012      03        22        082              0.000000       9.731079       0.317531       0.237009   -9999.000000   -9999.000000       0.056600   -9999.000000
56185     56185     sichuan        103.6333       32.1333          111       135     2012      03        23        083              0.000000       3.739166       1.039009       0.229111   -9999.000000   -9999.000000       0.038900       0.174000
56185     56185     sichuan        103.6333       32.1333          111       135     2012      03        24        084              0.000000       1.876709       0.945006       0.206226       0.149000   -9999.000000       0.061600   -9999.000000
56185     56185     sichuan        103.6333       32.1333          111       135     2012      03        25        085              0.000000       4.753510       0.098369       0.226307       0.147000   -9999.000000   -9999.000000       0.470000
56185     56185     sichuan        103.6333       32.1333          111       135     2012      03        26        086              0.000000       6.528900       1.181152       0.236572       0.139000   -9999.000000   -9999.000000       0.497000
56185     56185     sichuan        103.6333       32.1333          111       135     2012      03        27        087              0.000000       7.757355       0.174159       0.238124   -9999.000000   -9999.000000       0.064200   -9999.000000
56185     56185     sichuan        103.6333       32.1333          111       135     2012      03        28        088              0.093500       8.944916       0.305366       0.237119   -9999.000000   -9999.000000       0.055500       0.424000
56185     56185     sichuan        103.6333       32.1333          111       135     2012      03        29        089              0.098154       8.535461       0.430298       0.237204   -9999.000000   -9999.000000       0.071100   -9999.000000
56185     56185     sichuan        103.6333       32.1333          111       135     2012      03        30        090              0.102750       5.282990       1.106427       0.239986   -9999.000000   -9999.000000       0.064000       0.242000
56185     56185     sichuan        103.6333       32.1333          111       135     2012      03        31        091              0.105125       3.960693       3.261765       0.232281   -9999.000000   -9999.000000   -9999.000000   -9999.000000
56185     56185     sichuan        103.6333       32.1333          111       135     2012      04        01        092              0.104167       4.742065       0.600946       0.223784   -9999.000000   -9999.000000   -9999.000000   -9999.000000
56185     56185     sichuan        103.6333       32.1333          111       135     2012      04        02        093              0.100417       5.813385       3.598180       0.232124   -9999.000000   -9999.000000       0.050100       0.548000
56185     56185     sichuan        103.6333       32.1333          111       135     2012      04        03        094              0.095542      10.272064       0.754481       0.233564       0.147000   -9999.000000       0.043000   -9999.000000
56185     56185     sichuan        103.6333       32.1333          111       135     2012      04        04        095              0.091292      10.996277       0.126799       0.231663       0.126000   -9999.000000       0.056200       0.546000
56185     56185     sichuan        103.6333       32.1333          111       135     2012      04        05        096              0.090000       9.924622       0.491790       0.231874       0.129000   -9999.000000       0.055100   -9999.000000
56185     56185     sichuan        103.6333       32.1333          111       135     2012      04        06        097              0.090292       6.623016       1.705468       0.237485   -9999.000000   -9999.000000   -9999.000000       0.282000
56185     56185     sichuan        103.6333       32.1333          111       135     2012      04        07        098              0.089375       6.113373       0.893331       0.246405   -9999.000000   -9999.000000       0.039900       0.297000
56185     56185     sichuan        103.6333       32.1333          111       135     2012      04        08        099              0.087625       5.945648       0.793968       0.242523       0.140000   -9999.000000       0.048600   -9999.000000
56185     56185     sichuan        103.6333       32.1333          111       135     2012      04        09        100              0.085000       7.211639       0.995005       0.241033       0.136000   -9999.000000       0.054500       0.460000
56185     56185     sichuan        103.6333       32.1333          111       135     2012      04        10        101              0.081333       8.481506       0.673438       0.242214       0.133000   -9999.000000       0.080600   -9999.000000
56185     56185     sichuan        103.6333       32.1333          111       135     2012      04        11        102              0.078667      11.106964       0.279305       0.239027   -9999.000000   -9999.000000   -9999.000000       0.529000
56185     56185     sichuan        103.6333       32.1333          111       135     2012      04        12        103              0.078000      12.752289       0.315309       0.234582   -9999.000000   -9999.000000   -9999.000000   -9999.000000
56185     56185     sichuan        103.6333       32.1333          111       135     2012      04        13        104              0.078500       6.922943       0.960437       0.237563       0.136000   -9999.000000       0.072000   -9999.000000
56185     56185     sichuan        103.6333       32.1333          111       135     2012      04        14        105              0.082750       7.559082       0.682112       0.238722       0.150000   -9999.000000       0.074400       0.610000
56185     56185     sichuan        103.6333       32.1333          111       135     2012      04        15        106              0.088542      10.339813       1.540212       0.239268       0.134000   -9999.000000       0.078300   -9999.000000
56185     56185     sichuan        103.6333       32.1333          111       135     2012      04        16        107              0.097500       8.984314       0.354314       0.238073   -9999.000000   -9999.000000       0.051000       0.340000
56185     56185     sichuan        103.6333       32.1333          111       135     2012      04        17        108              0.119375       4.969330       0.000000       0.238057   -9999.000000   -9999.000000   -9999.000000   -9999.000000
56185     56185     sichuan        103.6333       32.1333          111       135     2012      04        18        109              0.117583       7.016632       0.372991       0.237518   -9999.000000   -9999.000000   -9999.000000   -9999.000000
56185     56185     sichuan        103.6333       32.1333          111       135     2012      04        19        110              0.118417       8.474915       0.227582       0.236345       0.137000   -9999.000000       0.047500       0.450000
56185     56185     sichuan        103.6333       32.1333          111       135     2012      04        20        111              0.116833       6.306305       0.616002       0.237922       0.135000   -9999.000000       0.034800   -9999.000000
56185     56185     sichuan        103.6333       32.1333          111       135     2012      04        21        112              0.110542       7.980865       0.734857       0.236362       0.130000   -9999.000000       0.053400       0.566000
56185     56185     sichuan        103.6333       32.1333          111       135     2012      04        22        113              0.102667      10.994720       0.880176       0.232861   -9999.000000   -9999.000000   -9999.000000   -9999.000000
56185     56185     sichuan        103.6333       32.1333          111       135     2012      04        23        114              0.094667      13.140411       1.964866       0.228143       0.141000   -9999.000000   -9999.000000       0.490000
56185     56185     sichuan        103.6333       32.1333          111       135     2012      04        24        115              0.093417      13.159943       0.320752       0.233356       0.131000   -9999.000000       0.071700       0.558000
56185     56185     sichuan        103.6333       32.1333          111       135     2012      04        25        116              0.000000      10.885559       0.183398       0.234264       0.145000   -9999.000000       0.073300   -9999.000000
56185     56185     sichuan        103.6333       32.1333          111       135     2012      04        26        117              0.084958      10.497894       0.761142       0.229475       0.134000   -9999.000000       0.059700       0.465000
56185     56185     sichuan        103.6333       32.1333          111       135     2012      04        27        118              0.080000      10.956329       3.303487       0.228485   -9999.000000   -9999.000000       0.075100   -9999.000000
56185     56185     sichuan        103.6333       32.1333          111       135     2012      04        28        119              0.075542      11.588287       0.379297       0.239464   -9999.000000   -9999.000000   -9999.000000       0.512000
56185     56185     sichuan        103.6333       32.1333          111       135     2012      04        29        120              0.071042      12.412628       0.717188       0.234249       0.127500   -9999.000000   -9999.000000   -9999.000000
56185     56185     sichuan        103.6333       32.1333          111       135     2012      04        30        121              0.067708      11.762512       2.283594       0.230999       0.131000   -9999.000000       0.083200   -9999.000000
56185     56185     sichuan        103.6333       32.1333          111       135     2012      05        01        122              0.073667      12.629852       1.706767       0.233962       0.165000   -9999.000000       0.081500       0.703000
56185     56185     sichuan        103.6333       32.1333          111       135     2012      05        02        123              0.081083      10.102692       3.670252       0.249281   -9999.000000   -9999.000000       0.087800   -9999.000000
56185     56185     sichuan        103.6333       32.1333          111       135     2012      05        03        124              0.090375      10.622253       5.483158       0.254341       0.170000   -9999.000000       0.084600       0.800000
56185     56185     sichuan        103.6333       32.1333          111       135     2012      05        04        125              0.093833      10.662994       0.702161       0.273163       0.179500   -9999.000000   -9999.000000   -9999.000000
56185     56185     sichuan        103.6333       32.1333          111       135     2012      05        05        126              0.087042      11.220093       0.196165       0.267658       0.176000   -9999.000000   -9999.000000       0.608000
56185     56185     sichuan        103.6333       32.1333          111       135     2012      05        06        127              0.077750      12.440796       1.255794       0.259143       0.169000   -9999.000000       0.080100       0.641000
56185     56185     sichuan        103.6333       32.1333          111       135     2012      05        07        128              0.069333      14.282837       1.859443       0.253111   -9999.000000   -9999.000000       0.090200   -9999.000000
56185     56185     sichuan        103.6333       32.1333          111       135     2012      05        08        129              0.063783      15.489899       7.358609       0.255925   -9999.000000   -9999.000000       0.087400       0.918000
56185     56185     sichuan        103.6333       32.1333          111       135     2012      05        09        130              0.059250      13.404938       1.627750       0.273072   -9999.000000   -9999.000000       0.090600   -9999.000000
56185     56185     sichuan        103.6333       32.1333          111       135     2012      05        10        131              0.055130      14.784027       3.769367       0.265955       0.170000   -9999.000000   -9999.000000       0.638000
56185     56185     sichuan        103.6333       32.1333          111       135     2012      05        11        132              0.051917      16.519867       8.745213       0.265662   -9999.000000   -9999.000000       0.090500   -9999.000000
56185     56185     sichuan        103.6333       32.1333          111       135     2012      05        12        133              0.052875      13.902863       0.475018       0.286131       0.190000   -9999.000000       0.091600   -9999.000000
56185     56185     sichuan        103.6333       32.1333          111       135     2012      05        13        134              0.053417      12.197876       6.737381       0.279945   -9999.000000   -9999.000000       0.078100       0.769000
56185     56185     sichuan        103.6333       32.1333          111       135     2012      05        14        135              0.053333      11.060638       0.153219       0.287327       0.179000   -9999.000000       0.091300   -9999.000000
56185     56185     sichuan        103.6333       32.1333          111       135     2012      05        15        136              0.051833      10.956329       0.504933       0.275533       0.187000   -9999.000000   -9999.000000       0.656000
56185     56185     sichuan        103.6333       32.1333          111       135     2012      05        16        137              0.052000      12.049683       0.306142       0.268107       0.183000   -9999.000000   -9999.000000   -9999.000000
56185     56185     sichuan        103.6333       32.1333          111       135     2012      05        17        138              0.050750      11.081207       4.770748       0.265104       0.184000   -9999.000000       0.089400   -9999.000000
56185     56185     sichuan        103.6333       32.1333          111       135     2012      05        18        139              0.049625      13.511597       0.199056       0.271410   -9999.000000   -9999.000000       0.083500       0.720000
56185     56185     sichuan        103.6333       32.1333          111       135     2012      05        19        140              0.047208      14.345093       1.514624       0.267129       0.177000   -9999.000000       0.085200   -9999.000000
56185     56185     sichuan        103.6333       32.1333          111       135     2012      05        20        141              0.044667      16.782898       1.228528       0.259180       0.196000   -9999.000000       0.088000       0.719000
56185     56185     sichuan        103.6333       32.1333          111       135     2012      05        21        142              0.124125      16.946991      22.642927       0.258956       0.187000   -9999.000000   -9999.000000   -9999.000000
56185     56185     sichuan        103.6333       32.1333          111       135     2012      05        22        143              0.167667      13.821716       5.198861       0.303306       0.207000   -9999.000000   -9999.000000       0.990000
56185     56185     sichuan        103.6333       32.1333          111       135     2012      05        23        144              0.154375      12.146027       6.602334       0.300268   -9999.000000   -9999.000000       0.120300       0.785000
56185     56185     sichuan        103.6333       32.1333          111       135     2012      05        24        145              0.169500      13.768463       5.817385       0.298085   -9999.000000   -9999.000000       0.116200   -9999.000000
56185     56185     sichuan        103.6333       32.1333          111       135     2012      05        25        146              0.000000      10.566772       0.913100       0.300673       0.236000   -9999.000000       0.121600       0.808000
56185     56185     sichuan        103.6333       32.1333          111       135     2012      05        26        147              0.156792      11.511841       2.780981       0.295060       0.223500   -9999.000000       0.091400   -9999.000000
56185     56185     sichuan        103.6333       32.1333          111       135     2012      05        27        148              0.140292      14.815338       3.509178       0.288784       0.198000   -9999.000000   -9999.000000       0.802000
56185     56185     sichuan        103.6333       32.1333          111       135     2012      05        28        149              0.190500      14.896332      19.707834       0.285984       0.216000   -9999.000000   -9999.000000   -9999.000000
56185     56185     sichuan        103.6333       32.1333          111       135     2012      05        29        150              0.195000      13.727051       2.951242       0.311773   -9999.000000   -9999.000000       0.114400   -9999.000000
56185     56185     sichuan        103.6333       32.1333          111       135     2012      05        30        151              0.170833      14.751160       7.067286       0.297321   -9999.000000   -9999.000000       0.115000   -9999.000000
56185     56185     sichuan        103.6333       32.1333          111       135     2012      05        31        152              0.165625      14.646088       1.238616       0.293663       0.237000   -9999.000000       0.119900   -9999.000000
56185     56185     sichuan        103.6333       32.1333          111       135     2012      06        01        153              0.162792      10.912018       0.111759       0.296311       0.242500   -9999.000000   -9999.000000       0.832000
56185     56185     sichuan        103.6333       32.1333          111       135     2012      06        02        154              0.175083      14.591309       8.199540       0.282933       0.244000   -9999.000000   -9999.000000   -9999.000000
56185     56185     sichuan        103.6333       32.1333          111       135     2012      06        03        155              0.218500      11.524170       2.122207       0.294469   -9999.000000   -9999.000000   -9999.000000       0.782000
56185     56185     sichuan        103.6333       32.1333          111       135     2012      06        04        156              0.205708      11.098846       0.501939       0.295800       0.278000   -9999.000000       0.081100       0.834000
56185     56185     sichuan        103.6333       32.1333          111       135     2012      06        05        157              0.195208      10.699463      10.072719       0.286309       0.274000   -9999.000000       0.076100   -9999.000000
56185     56185     sichuan        103.6333       32.1333          111       135     2012      06        06        158              0.224333      13.482361       5.665413       0.294638       0.252000   -9999.000000       0.080800       0.906000
56185     56185     sichuan        103.6333       32.1333          111       135     2012      06        07        159              0.206083      12.828125       3.101773       0.306120       0.230000   -9999.000000   -9999.000000   -9999.000000
56185     56185     sichuan        103.6333       32.1333          111       135     2012      06        08        160              0.211833      14.517395       1.183238       0.292702   -9999.000000   -9999.000000       0.076700       0.845000
56185     56185     sichuan        103.6333       32.1333          111       135     2012      06        09        161              0.213167      12.521393      16.059595       0.292861   -9999.000000   -9999.000000       0.079900   -9999.000000
56185     56185     sichuan        103.6333       32.1333          111       135     2012      06        10        162              0.212167      13.944031       0.128076       0.303043       0.251000   -9999.000000       0.075200   -9999.000000
56185     56185     sichuan        103.6333       32.1333          111       135     2012      06        11        163              0.000000      13.045044       0.794682       0.300959       0.269000   -9999.000000       0.069100       0.720000
56185     56185     sichuan        103.6333       32.1333          111       135     2012      06        12        164              0.195250      11.584198       0.000000       0.291179       0.262000   -9999.000000   -9999.000000   -9999.000000
56185     56185     sichuan        103.6333       32.1333          111       135     2012      06        13        165              0.194458      12.552582       5.899151       0.282796       0.269000   -9999.000000   -9999.000000       1.000000
56185     56185     sichuan        103.6333       32.1333          111       135     2012      06        14        166              0.205625      13.305878       0.554644       0.291817       0.270000   -9999.000000       0.065500   -9999.000000
56185     56185     sichuan        103.6333       32.1333          111       135     2012      06        15        167              0.197792      13.844910       3.855001       0.283166       0.283000   -9999.000000       0.068100   -9999.000000
56185     56185     sichuan        103.6333       32.1333          111       135     2012      06        16        168              0.209417      11.702118       3.079837       0.288230       0.277000   -9999.000000       0.068000       0.892000
56185     56185     sichuan        103.6333       32.1333          111       135     2012      06        17        169              0.199958      11.561218       1.939991       0.289138       0.250000   -9999.000000       0.068400   -9999.000000
56185     56185     sichuan        103.6333       32.1333          111       135     2012      06        18        170              0.195833      14.106323       1.408987       0.282493   -9999.000000   -9999.000000   -9999.000000       0.828000
56185     56185     sichuan        103.6333       32.1333          111       135     2012      06        19        171              0.191042      14.436798       0.325051       0.282616   -9999.000000   -9999.000000   -9999.000000   -9999.000000
56185     56185     sichuan        103.6333       32.1333          111       135     2012      06        20        172              0.184500      15.329712       2.689743       0.273936       0.255000   -9999.000000       0.124700       0.712000
56185     56185     sichuan        103.6333       32.1333          111       135     2012      06        21        173              0.178750      14.159302       0.000000       0.269958       0.302000   -9999.000000       0.126300       0.709000
56185     56185     sichuan        103.6333       32.1333          111       135     2012      06        22        174              0.174125      13.927368       3.547882       0.266625       0.283000   -9999.000000       0.125000   -9999.000000
56185     56185     sichuan        103.6333       32.1333          111       135     2012      06        23        175              0.165917      14.617767       0.000000       0.274147       0.266000   -9999.000000       0.125400       0.696000
56185     56185     sichuan        103.6333       32.1333          111       135     2012      06        24        176              0.160458      16.032440       1.619535       0.266841   -9999.000000   -9999.000000   -9999.000000   -9999.000000
56185     56185     sichuan        103.6333       32.1333          111       135     2012      06        25        177              0.156917      13.974579       3.175345       0.269589       0.318000   -9999.000000       0.052100       0.848000
56185     56185     sichuan        103.6333       32.1333          111       135     2012      06        26        178              0.158042      14.943695       9.042863       0.273248       0.297000   -9999.000000       0.053900   -9999.000000
56185     56185     sichuan        103.6333       32.1333          111       135     2012      06        27        179              0.178083      14.984924       0.207918       0.293145       0.291000   -9999.000000       0.051000       0.900000
56185     56185     sichuan        103.6333       32.1333          111       135     2012      06        28        180              0.207000      15.374725      10.566245       0.282572       0.272000   -9999.000000       0.052100       0.900000
56185     56185     sichuan        103.6333       32.1333          111       135     2012      06        29        181              0.217208      16.076141      31.548292       0.286481   -9999.000000   -9999.000000   -9999.000000   -9999.000000
56185     56185     sichuan        103.6333       32.1333          111       135     2012      06        30        182              0.209750      15.076508      15.587012       0.336609       0.307000   -9999.000000   -9999.000000   -9999.000000
56185     56185     sichuan        103.6333       32.1333          111       135     2012      07        01        183              0.212625      14.132568      35.258427       0.326968       0.358000   -9999.000000       0.050200   -9999.000000
56185     56185     sichuan        103.6333       32.1333          111       135     2012      07        02        184              0.221625      16.025940       0.686729       0.333245       0.357500   -9999.000000       0.076500       1.000000
56185     56185     sichuan        103.6333       32.1333          111       135     2012      07        03        185              0.221750      15.653442      36.902298       0.315046       0.326000   -9999.000000       0.072500       1.000000
56185     56185     sichuan        103.6333       32.1333          111       135     2012      07        04        186              0.207417      15.460205       0.437896       0.310917       0.383000   -9999.000000       0.076400   -9999.000000
56185     56185     sichuan        103.6333       32.1333          111       135     2012      07        05        187              0.188458      15.014923       1.074052       0.296984   -9999.000000   -9999.000000   -9999.000000       0.840000
56185     56185     sichuan        103.6333       32.1333          111       135     2012      07        06        188              0.207391      16.363739      21.671837       0.286955   -9999.000000   -9999.000000   -9999.000000   -9999.000000
56185     56185     sichuan        103.6333       32.1333          111       135     2012      07        07        189              0.205458      16.017761       0.101111       0.315010   -9999.000000   -9999.000000       0.075200       0.883000
56185     56185     sichuan        103.6333       32.1333          111       135     2012      07        08        190              0.192875      16.321228      12.705368       0.302168       0.346000   -9999.000000       0.075500   -9999.000000
56185     56185     sichuan        103.6333       32.1333          111       135     2012      07        09        191              0.204375      16.839264      13.703648       0.313264       0.330000   -9999.000000       0.051300   -9999.000000
56185     56185     sichuan        103.6333       32.1333          111       135     2012      07        10        192              0.201167      16.348938       0.000000       0.318387   -9999.000000   -9999.000000       0.060300       0.852000
56185     56185     sichuan        103.6333       32.1333          111       135     2012      07        11        193              0.188083      17.731201       0.970490       0.300725       0.302000   -9999.000000   -9999.000000   -9999.000000
56185     56185     sichuan        103.6333       32.1333          111       135     2012      07        12        194              0.188250      15.014740       0.285567       0.295300       0.307500   -9999.000000       0.060800       0.831000
56185     56185     sichuan        103.6333       32.1333          111       135     2012      07        13        195              0.178708      14.252014       0.000000       0.291598       0.268500   -9999.000000       0.060000   -9999.000000
56185     56185     sichuan        103.6333       32.1333          111       135     2012      07        14        196              0.198125      17.285828       2.388127       0.285463   -9999.000000   -9999.000000       0.061400   -9999.000000
56185     56185     sichuan        103.6333       32.1333          111       135     2012      07        15        197              0.204667      14.867859       0.000000       0.291116   -9999.000000   -9999.000000       0.063000       0.790000
56185     56185     sichuan        103.6333       32.1333          111       135     2012      07        16        198              0.197750      15.214325      12.361172       0.285970   -9999.000000   -9999.000000   -9999.000000   -9999.000000
56185     56185     sichuan        103.6333       32.1333          111       135     2012      07        17        199              0.204542      14.778229      13.192923       0.295928       0.327000   -9999.000000   -9999.000000       1.000000
56185     56185     sichuan        103.6333       32.1333          111       135     2012      07        18        200              0.208375      13.779480       2.237846       0.324206       0.305000   -9999.000000       0.048300   -9999.000000
56185     56185     sichuan        103.6333       32.1333          111       135     2012      07        19        201              0.213583      14.725067       0.260138       0.303601       0.318500   -9999.000000       0.048900       0.862000
56185     56185     sichuan        103.6333       32.1333          111       135     2012      07        20        202              0.201375      15.175262       1.762640       0.297714       0.294000   -9999.000000       0.049700       0.862000
56185     56185     sichuan        103.6333       32.1333          111       135     2012      07        21        203              0.212348      15.596497      13.466468       0.292941   -9999.000000   -9999.000000       0.045200   -9999.000000
56185     56185     sichuan        103.6333       32.1333          111       135     2012      07        22        204              0.211292      15.567810       1.100875       0.314225       0.500000   -9999.000000   -9999.000000       0.990000
56185     56185     sichuan        103.6333       32.1333          111       135     2012      07        23        205              0.213958      14.957153       1.909855       0.301896       0.500000   -9999.000000   -9999.000000   -9999.000000
56185     56185     sichuan        103.6333       32.1333          111       135     2012      07        24        206              0.223000      14.264709       0.676630       0.298082       0.500000   -9999.000000       0.100300       0.807000
56185     56185     sichuan        103.6333       32.1333          111       135     2012      07        25        207              0.209708      15.742065       0.000000       0.292676       0.500000   -9999.000000       0.100700   -9999.000000
56185     56185     sichuan        103.6333       32.1333          111       135     2012      07        26        208              0.193000      17.546936       0.238962       0.286234   -9999.000000   -9999.000000       0.101800       0.902000
56185     56185     sichuan        103.6333       32.1333          111       135     2012      07        27        209              0.218958      17.937836       0.700142       0.282733       0.500000   -9999.000000       0.102000       0.794000
56185     56185     sichuan        103.6333       32.1333          111       135     2012      07        28        210              0.201667      16.178375       0.000000       0.285324       0.500000   -9999.000000   -9999.000000   -9999.000000
56185     56185     sichuan        103.6333       32.1333          111       135     2012      07        29        211              0.181583      18.330017       3.961037       0.280228       0.500000   -9999.000000       0.098500       0.814000
56185     56185     sichuan        103.6333       32.1333          111       135     2012      07        30        212              0.170792      18.495239       3.583243       0.277039       0.500000   -9999.000000       0.098600   -9999.000000
56185     56185     sichuan        103.6333       32.1333          111       135     2012      07        31        213              0.206583      17.511108      21.234524       0.284642       0.500000   -9999.000000       0.094800       0.961000
56185     56185     sichuan        103.6333       32.1333          111       135     2012      08        01        214              0.216250      14.863525       1.183252       0.304026   -9999.000000   -9999.000000       0.096200       0.890000
56185     56185     sichuan        103.6333       32.1333          111       135     2012      08        02        215              0.212333      14.818817       0.000000       0.312091       0.500000   -9999.000000   -9999.000000   -9999.000000
56185     56185     sichuan        103.6333       32.1333          111       135     2012      08        03        216              0.204708      16.798370       0.000000       0.293837       0.500000   -9999.000000   -9999.000000       0.795000
56185     56185     sichuan        103.6333       32.1333          111       135     2012      08        04        217              0.186042      17.654083      10.892700       0.286075       0.500000   -9999.000000       0.094200   -9999.000000
56185     56185     sichuan        103.6333       32.1333          111       135     2012      08        05        218              0.186875      17.209259       1.692399       0.302931       0.500000   -9999.000000       0.096200       0.794000
56185     56185     sichuan        103.6333       32.1333          111       135     2012      08        06        219              0.182625      16.390411       1.023725       0.299017   -9999.000000   -9999.000000       0.145800   -9999.000000
56185     56185     sichuan        103.6333       32.1333          111       135     2012      08        07        220              0.166917      16.909302       0.000000       0.289318       0.500000   -9999.000000       0.144000   -9999.000000
56185     56185     sichuan        103.6333       32.1333          111       135     2012      08        08        221              0.152292      18.089752       0.136763       0.282555       0.500000   -9999.000000   -9999.000000       0.869000
56185     56185     sichuan        103.6333       32.1333          111       135     2012      08        09        222              0.136250      18.602295       1.359113       0.278309       0.500000   -9999.000000   -9999.000000   -9999.000000
56185     56185     sichuan        103.6333       32.1333          111       135     2012      08        10        223              0.122375      18.704681       0.102583       0.275030       0.500000   -9999.000000       0.141000       0.753000
56185     56185     sichuan        103.6333       32.1333          111       135     2012      08        11        224              0.109542      19.183807       0.000000       0.272339   -9999.000000   -9999.000000       0.145300   -9999.000000
56185     56185     sichuan        103.6333       32.1333          111       135     2012      08        12        225              0.098083      19.944702       0.807647       0.269526       0.497000   -9999.000000       0.137200   -9999.000000
56185     56185     sichuan        103.6333       32.1333          111       135     2012      08        13        226              0.090500      20.253479       0.681938       0.268379       0.489000   -9999.000000   -9999.000000       0.813000
56185     56185     sichuan        103.6333       32.1333          111       135     2012      08        14        227              0.086667      19.564362      24.308517       0.268102       0.500000   -9999.000000   -9999.000000   -9999.000000
56185     56185     sichuan        103.6333       32.1333          111       135     2012      08        15        228              0.085333      18.385895       0.000000       0.334363       0.497500   -9999.000000       0.162900       0.726000
56185     56185     sichuan        103.6333       32.1333          111       135     2012      08        16        229              0.080250      18.501221       0.664245       0.296154       0.496000   -9999.000000       0.167200   -9999.000000
56185     56185     sichuan        103.6333       32.1333          111       135     2012      08        17        230              0.075208      19.201691       0.917610       0.284922   -9999.000000   -9999.000000       0.177700       0.584000
56185     56185     sichuan        103.6333       32.1333          111       135     2012      08        18        231              0.071292      18.121155       2.791409       0.281879       0.500000   -9999.000000       0.170100       0.757000
56185     56185     sichuan        103.6333       32.1333          111       135     2012      08        19        232              0.077917      17.598450       6.033805       0.284290       0.498000   -9999.000000   -9999.000000   -9999.000000
56185     56185     sichuan        103.6333       32.1333          111       135     2012      08        20        233              0.082542      15.617218       0.432318       0.295835       0.494500   -9999.000000   -9999.000000       0.714000
56185     56185     sichuan        103.6333       32.1333          111       135     2012      08        21        234              0.090417      16.909851       3.536299       0.287029       0.500000   -9999.000000       0.204400   -9999.000000
56185     56185     sichuan        103.6333       32.1333          111       135     2012      08        22        235              0.113167      13.795990       0.000000       0.290466   -9999.000000   -9999.000000       0.205700   -9999.000000
56185     56185     sichuan        103.6333       32.1333          111       135     2012      08        23        236              0.109042      13.965668       3.136245       0.282440       0.500000   -9999.000000       0.197800   -9999.000000
56185     56185     sichuan        103.6333       32.1333          111       135     2012      08        24        237              0.099333      15.733490       8.355858       0.279502       0.496000   -9999.000000       0.194900   -9999.000000
56185     56185     sichuan        103.6333       32.1333          111       135     2012      08        25        238              0.000000      16.056488       3.159402       0.284067       0.500000   -9999.000000   -9999.000000       0.740000
56185     56185     sichuan        103.6333       32.1333          111       135     2012      08        26        239              0.086667      15.382111       0.000000       0.279317       0.495500   -9999.000000       0.201900   -9999.000000
56185     56185     sichuan        103.6333       32.1333          111       135     2012      08        27        240              0.080542      16.795746      13.016062       0.272988       0.493000   -9999.000000       0.183600       0.921000
56185     56185     sichuan        103.6333       32.1333          111       135     2012      08        28        241              0.085292      15.359589       0.000000       0.276021   -9999.000000   -9999.000000       0.180200   -9999.000000
56185     56185     sichuan        103.6333       32.1333          111       135     2012      08        29        242              0.090458      15.699646       1.614140       0.272993       0.500000   -9999.000000       0.175000       0.706000
56185     56185     sichuan        103.6333       32.1333          111       135     2012      08        30        243              0.104542      16.093506      10.722133       0.273593       0.499500   -9999.000000   -9999.000000       0.733000
56185     56185     sichuan        103.6333       32.1333          111       135     2012      08        31        244              0.115583      15.920135       2.159911       0.270654       0.500000   -9999.000000   -9999.000000   -9999.000000
56185     56185     sichuan        103.6333       32.1333          111       135     2012      09        01        245              0.131667      15.414642       4.319410       0.272450       0.490000   -9999.000000       0.174700       0.813000
56185     56185     sichuan        103.6333       32.1333          111       135     2012      09        02        246              0.128125      14.457367       0.000000       0.288619   -9999.000000   -9999.000000       0.178400   -9999.000000
56185     56185     sichuan        103.6333       32.1333          111       135     2012      09        03        247              0.120500      15.251312       0.485478       0.274644   -9999.000000   -9999.000000       0.216000       0.566000
56185     56185     sichuan        103.6333       32.1333          111       135     2012      09        04        248              0.109208      14.444092       0.146767       0.271189       0.478000   -9999.000000       0.221800   -9999.000000
56185     56185     sichuan        103.6333       32.1333          111       135     2012      09        05        249              0.097042      15.418121       1.682155       0.266424       0.493000   -9999.000000   -9999.000000   -9999.000000
56185     56185     sichuan        103.6333       32.1333          111       135     2012      09        06        250              0.087250      16.007874       1.302405       0.262417       0.486000   -9999.000000   -9999.000000       0.807000
56185     56185     sichuan        103.6333       32.1333          111       135     2012      09        07        251              0.080542      16.223511       1.555482       0.265330   -9999.000000   -9999.000000       0.219700   -9999.000000
56185     56185     sichuan        103.6333       32.1333          111       135     2012      09        08        252              0.077208      15.740692       1.555241       0.267184       0.499000   -9999.000000       0.227000       0.658000
56185     56185     sichuan        103.6333       32.1333          111       135     2012      09        09        253              0.091667      16.598206      17.930811       0.268532       0.500000   -9999.000000       0.219700   -9999.000000
56185     56185     sichuan        103.6333       32.1333          111       135     2012      09        10        254              0.118250      16.192078      13.776412       0.298030       0.499000   -9999.000000       0.107400   -9999.000000
56185     56185     sichuan        103.6333       32.1333          111       135     2012      09        11        255              0.137875      15.661163      20.771626       0.316014       0.257000   -9999.000000   -9999.000000       0.998000
56185     56185     sichuan        103.6333       32.1333          111       135     2012      09        12        256              0.188083      16.083252       0.804726       0.319609       0.302000   -9999.000000       0.109300   -9999.000000
56185     56185     sichuan        103.6333       32.1333          111       135     2012      09        13        257              0.165875      13.134888       2.026124       0.309431   -9999.000000   -9999.000000       0.107000       0.674000
56185     56185     sichuan        103.6333       32.1333          111       135     2012      09        14        258              0.147458      12.282806       0.401227       0.298609       0.292000   -9999.000000       0.109100   -9999.000000
56185     56185     sichuan        103.6333       32.1333          111       135     2012      09        15        259              0.138208      13.065704       6.866898       0.288318       0.285500   -9999.000000       0.111800       0.547000
56185     56185     sichuan        103.6333       32.1333          111       135     2012      09        16        260              0.143208      11.386047       0.204440       0.293795       0.313000   -9999.000000   -9999.000000       0.762000
56185     56185     sichuan        103.6333       32.1333          111       135     2012      09        17        261              0.138208      10.058167       0.653221       0.295544       0.271000   -9999.000000   -9999.000000   -9999.000000
56185     56185     sichuan        103.6333       32.1333          111       135     2012      09        18        262              0.136000      12.184509       0.908640       0.287541   -9999.000000   -9999.000000       0.118800       0.654000
56185     56185     sichuan        103.6333       32.1333          111       135     2012      09        19        263              0.129583      10.660126       2.663884       0.286611       0.297000   -9999.000000       0.123000   -9999.000000
56185     56185     sichuan        103.6333       32.1333          111       135     2012      09        20        264              0.121958      12.596710       0.156740       0.286314       0.307500   -9999.000000       0.120300       0.777000
56185     56185     sichuan        103.6333       32.1333          111       135     2012      09        21        265              0.125583      11.966095       0.407131       0.283691   -9999.000000   -9999.000000       0.122200   -9999.000000
56185     56185     sichuan        103.6333       32.1333          111       135     2012      09        22        266              0.126833      11.748596       0.153702       0.282053       0.273000   -9999.000000   -9999.000000   -9999.000000
56185     56185     sichuan        103.6333       32.1333          111       135     2012      09        23        267              0.123125      12.832031       0.069838       0.279313       0.291000   -9999.000000   -9999.000000       0.581000
56185     56185     sichuan        103.6333       32.1333          111       135     2012      09        24        268              0.117208      12.719238       6.885728       0.277177   -9999.000000   -9999.000000       0.067900   -9999.000000
56185     56185     sichuan        103.6333       32.1333          111       135     2012      09        25        269              0.151500      11.568390       6.657637       0.286992       0.300000   -9999.000000       0.066500       0.927000
56185     56185     sichuan        103.6333       32.1333          111       135     2012      09        26        270              0.186917      11.389313       0.757008       0.302393       0.288500   -9999.000000       0.068000   -9999.000000
56185     56185     sichuan        103.6333       32.1333          111       135     2012      09        27        271              0.180357      12.648254       0.426552       0.293900       0.302000   -9999.000000       0.067100       0.895000
56185     56185     sichuan        103.6333       32.1333          111       135     2012      09        28        272              0.183467      11.649445       1.692348       0.287476       0.283000   -9999.000000   -9999.000000       0.780000
56185     56185     sichuan        103.6333       32.1333          111       135     2012      09        29        273              0.198333      11.750214       6.882842       0.286564   -9999.000000   -9999.000000       0.065900   -9999.000000
56185     56185     sichuan        103.6333       32.1333          111       135     2012      09        30        274              0.184292      10.565918       0.000000       0.298777       0.289000   -9999.000000       0.068200       0.777000
56185     56185     sichuan        103.6333       32.1333          111       135     2012      10        01        275              0.174250      11.938660       2.659306       0.289254       0.264500   -9999.000000       0.052700   -9999.000000
56185     56185     sichuan        103.6333       32.1333          111       135     2012      10        02        276              0.169917      11.033661       0.737821       0.290960       0.271500   -9999.000000       0.054900       0.664000
56185     56185     sichuan        103.6333       32.1333          111       135     2012      10        03        277              0.183792      10.447205       4.572044       0.286309       0.273000   -9999.000000   -9999.000000   -9999.000000
56185     56185     sichuan        103.6333       32.1333          111       135     2012      10        04        278              0.209292      11.138458       8.602208       0.291073   -9999.000000   -9999.000000   -9999.000000   -9999.000000
56185     56185     sichuan        103.6333       32.1333          111       135     2012      10        05        279              0.208458       8.955414       1.676859       0.303450       0.286000   -9999.000000       0.055900       0.840000
56185     56185     sichuan        103.6333       32.1333          111       135     2012      10        06        280              0.206125       8.137390       5.372111       0.299828       0.287000   -9999.000000       0.057100   -9999.000000
56185     56185     sichuan        103.6333       32.1333          111       135     2012      10        07        281              0.204250       9.246033       3.175294       0.298887       0.293000   -9999.000000       0.053900       0.866000
56185     56185     sichuan        103.6333       32.1333          111       135     2012      10        08        282              0.201042      10.438812       2.238015       0.301083   -9999.000000   -9999.000000       0.076600   -9999.000000
56185     56185     sichuan        103.6333       32.1333          111       135     2012      10        09        283              0.208875      10.487823       4.465055       0.296641       0.294000   -9999.000000   -9999.000000   -9999.000000
56185     56185     sichuan        103.6333       32.1333          111       135     2012      10        10        284              0.209958       8.545105       4.068919       0.299906   -9999.000000   -9999.000000   -9999.000000       0.846000
56185     56185     sichuan        103.6333       32.1333          111       135     2012      10        11        285              0.214792       8.266479      13.898540       0.299061   -9999.000000   -9999.000000       0.077300   -9999.000000
56185     56185     sichuan        103.6333       32.1333          111       135     2012      10        12        286              0.212917       8.158691       3.199973       0.310911       0.279000   -9999.000000       0.074600       0.888000
56185     56185     sichuan        103.6333       32.1333          111       135     2012      10        13        287              0.201083       7.511932       2.289900       0.311388       0.282500   -9999.000000       0.081500   -9999.000000
56185     56185     sichuan        103.6333       32.1333          111       135     2012      10        14        288              0.187000       8.264069       8.638733       0.301378       0.284000   -9999.000000   -9999.000000       0.785000
56185     56185     sichuan        103.6333       32.1333          111       135     2012      10        15        289              0.175478       9.544647       4.911238       0.307794   -9999.000000   -9999.000000   -9999.000000       0.791000
56185     56185     sichuan        103.6333       32.1333          111       135     2012      10        16        290              0.168458       9.881714       2.428976       0.308000   -9999.000000   -9999.000000       0.068000   -9999.000000
56185     56185     sichuan        103.6333       32.1333          111       135     2012      10        17        291              0.160458       8.707458       0.981708       0.299653       0.317000   -9999.000000       0.069900       0.586000
56185     56185     sichuan        103.6333       32.1333          111       135     2012      10        18        292              0.154000       8.850555       4.891168       0.293625       0.278500   -9999.000000       0.071200   -9999.000000
56185     56185     sichuan        103.6333       32.1333          111       135     2012      10        19        293              0.151250       9.893341       0.843654       0.298749       0.261500   -9999.000000       0.071300       0.679000
56185     56185     sichuan        103.6333       32.1333          111       135     2012      10        20        294              0.147542       9.690491       0.533391       0.294310       0.304000   -9999.000000   -9999.000000   -9999.000000
56185     56185     sichuan        103.6333       32.1333          111       135     2012      10        21        295              0.143458       9.698273       3.991138       0.289832   -9999.000000   -9999.000000   -9999.000000   -9999.000000
56185     56185     sichuan        103.6333       32.1333          111       135     2012      10        22        296              0.144333       9.430725       0.216368       0.295476   -9999.000000   -9999.000000       0.086200       0.528000
56185     56185     sichuan        103.6333       32.1333          111       135     2012      10        23        297              0.144667       8.697754       3.483529       0.290222   -9999.000000   -9999.000000       0.084600   -9999.000000
56185     56185     sichuan        103.6333       32.1333          111       135     2012      10        24        298              0.148750       7.450806       0.129444       0.296010   -9999.000000   -9999.000000       0.088500       0.636000
56185     56185     sichuan        103.6333       32.1333          111       135     2012      10        25        299              0.000000       7.122559       0.470615       0.290063       0.235000   -9999.000000       0.087400   -9999.000000
56185     56185     sichuan        103.6333       32.1333          111       135     2012      10        26        300              0.152667       7.907837       0.409074       0.287708   -9999.000000   -9999.000000   -9999.000000       0.542000
56185     56185     sichuan        103.6333       32.1333          111       135     2012      10        27        301              0.149125       8.153656       0.429214       0.285344   -9999.000000   -9999.000000       0.080200       0.463000
56185     56185     sichuan        103.6333       32.1333          111       135     2012      10        28        302              0.000000       8.596222       3.446316       0.284292       0.236500   -9999.000000       0.084800   -9999.000000
56185     56185     sichuan        103.6333       32.1333          111       135     2012      10        29        303              0.144208       8.930878       7.470639       0.282506       0.254000   -9999.000000       0.087600       0.582000
56185     56185     sichuan        103.6333       32.1333          111       135     2012      10        30        304              0.144042       7.808624       1.652971       0.292146       0.225000   -9999.000000       0.092300   -9999.000000
56185     56185     sichuan        103.6333       32.1333          111       135     2012      10        31        305              0.141333       5.743042       2.445145       0.290872       0.239000   -9999.000000   -9999.000000       0.453000
56185     56185     sichuan        103.6333       32.1333          111       135     2012      11        01        306              0.139500       5.833618       0.246077       0.292888   -9999.000000   -9999.000000   -9999.000000   -9999.000000
56185     56185     sichuan        103.6333       32.1333          111       135     2012      11        02        307              0.137958       5.858856       0.953690       0.287231   -9999.000000   -9999.000000       0.091400   -9999.000000
56185     56185     sichuan        103.6333       32.1333          111       135     2012      11        03        308              0.136417       6.068451       1.107533       0.286363       0.267000   -9999.000000       0.083000       0.422000
56185     56185     sichuan        103.6333       32.1333          111       135     2012      11        04        309              0.136167       4.357178       0.481734       0.280234       0.265000   -9999.000000       0.096900   -9999.000000
56185     56185     sichuan        103.6333       32.1333          111       135     2012      11        05        310              0.135375       4.515686       2.231151       0.276350       0.257000   -9999.000000       0.083900       0.320000
56185     56185     sichuan        103.6333       32.1333          111       135     2012      11        06        311              0.135250       4.368713       2.300504       0.281543   -9999.000000   -9999.000000   -9999.000000   -9999.000000
56185     56185     sichuan        103.6333       32.1333          111       135     2012      11        07        312              0.135130       4.485931       6.840717       0.282237   -9999.000000   -9999.000000   -9999.000000   -9999.000000
56185     56185     sichuan        103.6333       32.1333          111       135     2012      11        08        313              0.139125       3.211090       4.353422       0.298017       0.282000   -9999.000000       0.081700       0.438000
56185     56185     sichuan        103.6333       32.1333          111       135     2012      11        09        314              0.140000       4.119263       1.354906       0.303769       0.252000   -9999.000000       0.075000   -9999.000000
56185     56185     sichuan        103.6333       32.1333          111       135     2012      11        10        315              0.139292       4.673462       0.915202       0.292455       0.255000   -9999.000000       0.087400       0.433000
56185     56185     sichuan        103.6333       32.1333          111       135     2012      11        11        316              0.138333       4.326508       3.231536       0.286054   -9999.000000   -9999.000000       0.079700   -9999.000000
56185     56185     sichuan        103.6333       32.1333          111       135     2012      11        12        317              0.137292       4.125763       2.158910       0.282655   -9999.000000   -9999.000000   -9999.000000       0.422000
56185     56185     sichuan        103.6333       32.1333          111       135     2012      11        13        318              0.000000       3.647888       1.886436       0.280700       0.246000   -9999.000000       0.085900       0.402000
56185     56185     sichuan        103.6333       32.1333          111       135     2012      11        14        319              0.135417       3.539429       0.839886       0.275034       0.222000   -9999.000000       0.092800   -9999.000000
56185     56185     sichuan        103.6333       32.1333          111       135     2012      11        15        320              0.135542       3.785370       6.123413       0.277108       0.217000   -9999.000000       0.084900       0.282000
56185     56185     sichuan        103.6333       32.1333          111       135     2012      11        16        321              0.139750       3.985474       0.813020       0.288055       0.211000   -9999.000000       0.090300   -9999.000000
56185     56185     sichuan        103.6333       32.1333          111       135     2012      11        17        322              0.000000       2.646698       1.953927       0.269655   -9999.000000   -9999.000000   -9999.000000       0.372000
56185     56185     sichuan        103.6333       32.1333          111       135     2012      11        18        323              0.140000       1.814880       1.076244       0.245518   -9999.000000   -9999.000000   -9999.000000   -9999.000000
56185     56185     sichuan        103.6333       32.1333          111       135     2012      11        19        324              0.139750       2.274689       0.365916       0.257288       0.225000   -9999.000000       0.077000       0.296000
56185     56185     sichuan        103.6333       32.1333          111       135     2012      11        20        325              0.139000       3.400360       0.770371       0.270534       0.226000   -9999.000000       0.071100       0.378000
56185     56185     sichuan        103.6333       32.1333          111       135     2012      11        21        326              0.138348       3.813568       3.762922       0.278701       0.202000   -9999.000000       0.080500   -9999.000000
56185     56185     sichuan        103.6333       32.1333          111       135     2012      11        22        327              0.138000       4.263031       0.000000       0.282290   -9999.000000   -9999.000000       0.072600       0.124000
56185     56185     sichuan        103.6333       32.1333          111       135     2012      11        23        328              0.137375       1.876984       0.000000       0.274649   -9999.000000   -9999.000000   -9999.000000   -9999.000000
56185     56185     sichuan        103.6333       32.1333          111       135     2012      11        24        329              0.136667       2.845215       1.313379       0.271776       0.217000   -9999.000000   -9999.000000       0.270000
56185     56185     sichuan        103.6333       32.1333          111       135     2012      11        25        330              0.137417       2.803070       1.311452       0.270217   -9999.000000   -9999.000000       0.072600       0.029000
56185     56185     sichuan        103.6333       32.1333          111       135     2012      11        26        331              0.141417       0.543091       0.431009       0.225621   -9999.000000   -9999.000000       0.061500   -9999.000000
56185     56185     sichuan        103.6333       32.1333          111       135     2012      11        27        332              0.143875       0.014984       0.000000       0.180675   -9999.000000   -9999.000000       0.059200       0.102000
56185     56185     sichuan        103.6333       32.1333          111       135     2012      11        28        333              0.144000       0.263367       0.136709       0.183112   -9999.000000   -9999.000000       0.054600   -9999.000000
56185     56185     sichuan        103.6333       32.1333          111       135     2012      11        29        334              0.143750       0.496399       0.057831       0.191367   -9999.000000   -9999.000000   -9999.000000       0.075000
56185     56185     sichuan        103.6333       32.1333          111       135     2012      11        30        335              0.144042       0.657654       2.361789       0.196953       0.212000   -9999.000000       0.061500   -9999.000000
56185     56185     sichuan        103.6333       32.1333          111       135     2012      12        01        336              0.144833       0.829193       0.275262       0.205972   -9999.000000   -9999.000000       0.059900   -9999.000000
56185     56185     sichuan        103.6333       32.1333          111       135     2012      12        02        337              0.145375      -0.135193       0.664664       0.182002   -9999.000000   -9999.000000       0.053900       0.297000
56185     56185     sichuan        103.6333       32.1333          111       135     2012      12        03        338              0.144000      -0.204956       0.556056       0.164700   -9999.000000   -9999.000000       0.068100   -9999.000000
56185     56185     sichuan        103.6333       32.1333          111       135     2012      12        04        339              0.142792       0.382477       0.382794       0.187154   -9999.000000   -9999.000000   -9999.000000       0.137000
56185     56185     sichuan        103.6333       32.1333          111       135     2012      12        05        340              0.141083      -0.502502       0.177283       0.160443   -9999.000000   -9999.000000   -9999.000000   -9999.000000
56185     56185     sichuan        103.6333       32.1333          111       135     2012      12        06        341              0.141000      -0.358032       0.607238       0.165282       0.234000   -9999.000000       0.072400   -9999.000000
56185     56185     sichuan        103.6333       32.1333          111       135     2012      12        07        342              0.139833      -0.236420       0.000000       0.164672       0.209000   -9999.000000       0.062200       0.222000
56185     56185     sichuan        103.6333       32.1333          111       135     2012      12        08        343              0.139000       0.207550       0.427914       0.177867   -9999.000000   -9999.000000       0.073700   -9999.000000
56185     56185     sichuan        103.6333       32.1333          111       135     2012      12        09        344              0.138583       0.413452       1.740312       0.186165   -9999.000000   -9999.000000       0.067500       0.183000
56185     56185     sichuan        103.6333       32.1333          111       135     2012      12        10        345              0.139000       0.869202       4.235757       0.200005   -9999.000000   -9999.000000   -9999.000000   -9999.000000
56185     56185     sichuan        103.6333       32.1333          111       135     2012      12        11        346              0.138000       0.326691       1.793948       0.191791       0.199000   -9999.000000       0.046000       0.080000
56185     56185     sichuan        103.6333       32.1333          111       135     2012      12        12        347              0.137250      -0.027466       3.133176       0.177327       0.195000   -9999.000000       0.056700       0.048000
56185     56185     sichuan        103.6333       32.1333          111       135     2012      12        13        348              0.137417       0.234894       4.395587       0.185468   -9999.000000   -9999.000000       0.046200   -9999.000000
56185     56185     sichuan        103.6333       32.1333          111       135     2012      12        14        349              0.136458       0.443207       3.072733       0.195196   -9999.000000   -9999.000000       0.051500       0.114000
56185     56185     sichuan        103.6333       32.1333          111       135     2012      12        15        350              0.000000      -0.255676       1.098944       0.173881   -9999.000000   -9999.000000   -9999.000000   -9999.000000
56185     56185     sichuan        103.6333       32.1333          111       135     2012      12        16        351              0.134708      -0.459229       0.358321       0.158510   -9999.000000   -9999.000000   -9999.000000       0.342000
56185     56185     sichuan        103.6333       32.1333          111       135     2012      12        17        352              0.135792       0.673462       0.394049       0.198957       0.191000   -9999.000000       0.060800   -9999.000000
56185     56185     sichuan        103.6333       32.1333          111       135     2012      12        18        353              0.136000       0.513580       3.630061       0.188624   -9999.000000   -9999.000000       0.051000       0.315000
56185     56185     sichuan        103.6333       32.1333          111       135     2012      12        19        354              0.135833       0.431885       0.000000       0.187021   -9999.000000   -9999.000000       0.063400       0.053000
56185     56185     sichuan        103.6333       32.1333          111       135     2012      12        20        355              0.000000       0.286652       2.093596       0.181211   -9999.000000   -9999.000000       0.055400   -9999.000000
56185     56185     sichuan        103.6333       32.1333          111       135     2012      12        21        356              0.135000      -0.449432       1.647231       0.156433       0.213000   -9999.000000   -9999.000000       0.008000
56185     56185     sichuan        103.6333       32.1333          111       135     2012      12        22        357              0.135750      -0.601013       4.800935       0.154705       0.207000   -9999.000000   -9999.000000   -9999.000000
56185     56185     sichuan        103.6333       32.1333          111       135     2012      12        23        358              0.134958      -1.378754       2.311159       0.139584       0.197000   -9999.000000       0.061100       0.006000
56185     56185     sichuan        103.6333       32.1333          111       135     2012      12        24        359              0.132100      -2.528687       1.301557       0.119476       0.209000   -9999.000000       0.062500       0.084000
56185     56185     sichuan        103.6333       32.1333          111       135     2012      12        25        360              0.129083      -1.936798       0.000000       0.126761   -9999.000000   -9999.000000       0.074300   -9999.000000
56185     56185     sichuan        103.6333       32.1333          111       135     2012      12        26        361              0.000000      -1.734161       0.000000       0.129101   -9999.000000   -9999.000000       0.061700       0.025000
56185     56185     sichuan        103.6333       32.1333          111       135     2012      12        27        362              0.126909      -1.764313       0.000000       0.129394       0.205000   -9999.000000   -9999.000000   -9999.000000
56185     56185     sichuan        103.6333       32.1333          111       135     2012      12        28        363              0.126000      -2.283295       0.188070       0.119274       0.201000   -9999.000000       0.061900       0.032000
56185     56185     sichuan        103.6333       32.1333          111       135     2012      12        29        364              0.000000      -1.428986       0.831984       0.142209   -9999.000000   -9999.000000       0.070400   -9999.000000
56185     56185     sichuan        103.6333       32.1333          111       135     2012      12        30        365              0.000000      -5.724457       6.332680       0.096784   -9999.000000   -9999.000000       0.059200   -9999.000000
56185     56185     sichuan        103.6333       32.1333          111       135     2012      12        31        366              0.127533      -5.495544       0.433548       0.094766   -9999.000000   -9999.000000       0.055400       0.026000
