# Supplementary material for: Research on Fusing Multisatellite Soil Moisture Data Based on Bayesian Model Averaging
Source: Hindawi journal article supplement (doi:10.1155/2018/9310838), 2018-06-25
Supplement: f1 [file 9310838.f1.zip › 2012_sm00-10cm_daily_ZDB_ZHY_56192_366days_allin.txt]

56192     56192     gansu          104.6700       32.9500          108       139     2012      01        01        001              0.000000   -9999.000000       0.000000   -9999.000000       0.164000   -9999.000000   -9999.000000   -9999.000000
56192     56192     gansu          104.6700       32.9500          108       139     2012      01        02        002              0.041000      -0.822632       0.000000       0.133053   -9999.000000   -9999.000000       0.048200   -9999.000000
56192     56192     gansu          104.6700       32.9500          108       139     2012      01        03        003              0.000000      -0.494598       0.000000       0.138953   -9999.000000   -9999.000000       0.049900       0.016000
56192     56192     gansu          104.6700       32.9500          108       139     2012      01        04        004              0.040000      -1.714203      10.916983       0.126878   -9999.000000   -9999.000000       0.045600       0.030000
56192     56192     gansu          104.6700       32.9500          108       139     2012      01        05        005              0.039667      -1.508331       0.000000       0.126686   -9999.000000   -9999.000000       0.049900   -9999.000000
56192     56192     gansu          104.6700       32.9500          108       139     2012      01        06        006              0.039000      -1.537872       2.879902       0.124357   -9999.000000   -9999.000000       0.047300       0.033000
56192     56192     gansu          104.6700       32.9500          108       139     2012      01        07        007              0.039000      -2.148621       0.000000       0.115984   -9999.000000   -9999.000000   -9999.000000   -9999.000000
56192     56192     gansu          104.6700       32.9500          108       139     2012      01        08        008              0.000000      -2.008209      32.448421       0.119078   -9999.000000   -9999.000000       0.049300       0.029000
56192     56192     gansu          104.6700       32.9500          108       139     2012      01        09        009              0.038208      -1.714264       0.000000       0.122301   -9999.000000   -9999.000000   -9999.000000       0.087000
56192     56192     gansu          104.6700       32.9500          108       139     2012      01        10        010              0.038000      -1.544922       0.000000       0.124481   -9999.000000   -9999.000000       0.044100       0.018000
56192     56192     gansu          104.6700       32.9500          108       139     2012      01        11        011              0.037957      -1.262054       0.000000       0.131384   -9999.000000   -9999.000000       0.042200   -9999.000000
56192     56192     gansu          104.6700       32.9500          108       139     2012      01        12        012              0.037292      -1.562103       0.000000       0.125828   -9999.000000   -9999.000000   -9999.000000   -9999.000000
56192     56192     gansu          104.6700       32.9500          108       139     2012      01        13        013              0.037000      -1.257263       0.308229       0.128588   -9999.000000   -9999.000000   -9999.000000       0.023000
56192     56192     gansu          104.6700       32.9500          108       139     2012      01        14        014              0.036917      -1.152161       0.124093       0.131218   -9999.000000   -9999.000000       0.039400   -9999.000000
56192     56192     gansu          104.6700       32.9500          108       139     2012      01        15        015              0.036391      -0.936371       0.000000       0.133563       0.145000   -9999.000000       0.036500       0.022000
56192     56192     gansu          104.6700       32.9500          108       139     2012      01        16        016              0.036000      -0.156708       0.000000       0.144199   -9999.000000   -9999.000000       0.035300       0.046000
56192     56192     gansu          104.6700       32.9500          108       139     2012      01        17        017              0.000000      -1.159454       0.000000       0.131314   -9999.000000   -9999.000000       0.034600   -9999.000000
56192     56192     gansu          104.6700       32.9500          108       139     2012      01        18        018              0.035958      -1.166718       0.227999       0.132436   -9999.000000   -9999.000000   -9999.000000       0.023000
56192     56192     gansu          104.6700       32.9500          108       139     2012      01        19        019              0.035292      -1.336700       0.306094       0.130443   -9999.000000   -9999.000000       0.031800   -9999.000000
56192     56192     gansu          104.6700       32.9500          108       139     2012      01        20        020              0.035000      -1.441711       1.088231       0.129034   -9999.000000   -9999.000000       0.033400       0.122000
56192     56192     gansu          104.6700       32.9500          108       139     2012      01        21        021              0.035000      -2.070953       0.499713       0.126397   -9999.000000   -9999.000000       0.029500   -9999.000000
56192     56192     gansu          104.6700       32.9500          108       139     2012      01        22        022              0.035000      -2.315674       0.000000       0.121429   -9999.000000   -9999.000000       0.031700   -9999.000000
56192     56192     gansu          104.6700       32.9500          108       139     2012      01        23        023              0.034609      -2.876129       0.000000       0.113298   -9999.000000   -9999.000000       0.033700       0.033000
56192     56192     gansu          104.6700       32.9500          108       139     2012      01        24        024              0.034250      -2.996918       0.000000       0.113797   -9999.000000   -9999.000000   -9999.000000   -9999.000000
56192     56192     gansu          104.6700       32.9500          108       139     2012      01        25        025              0.034000      -2.931396       0.000000       0.113401       0.139000   -9999.000000       0.030000       0.061000
56192     56192     gansu          104.6700       32.9500          108       139     2012      01        26        026              0.034000      -1.690979       0.000000       0.123734   -9999.000000   -9999.000000       0.033200   -9999.000000
56192     56192     gansu          104.6700       32.9500          108       139     2012      01        27        027              0.034000      -2.115021       0.000000       0.120595   -9999.000000   -9999.000000       0.034500   -9999.000000
56192     56192     gansu          104.6700       32.9500          108       139     2012      01        28        028              0.034000      -2.095642       0.000000       0.117393   -9999.000000   -9999.000000       0.034000       0.121000
56192     56192     gansu          104.6700       32.9500          108       139     2012      01        29        029              0.033917      -1.085510       0.000000       0.130111   -9999.000000   -9999.000000   -9999.000000   -9999.000000
56192     56192     gansu          104.6700       32.9500          108       139     2012      01        30        030              0.033292      -0.966461       0.000000       0.133286   -9999.000000   -9999.000000   -9999.000000       0.007000
56192     56192     gansu          104.6700       32.9500          108       139     2012      01        31        031              0.033083      -0.460938       0.000000       0.139276       0.139000   -9999.000000       0.039700   -9999.000000
56192     56192     gansu          104.6700       32.9500          108       139     2012      02        01        032              0.033000       1.290558       0.000000       0.161402   -9999.000000   -9999.000000       0.031700       0.163000
56192     56192     gansu          104.6700       32.9500          108       139     2012      02        02        033              0.032625       1.171326       0.000000       0.162176   -9999.000000   -9999.000000       0.036700       0.114000
56192     56192     gansu          104.6700       32.9500          108       139     2012      02        03        034              0.032000       0.387054       0.000000       0.152687   -9999.000000   -9999.000000       0.037400   -9999.000000
56192     56192     gansu          104.6700       32.9500          108       139     2012      02        04        035              0.032000       0.296265       0.000000       0.149804   -9999.000000   -9999.000000   -9999.000000       0.041000
56192     56192     gansu          104.6700       32.9500          108       139     2012      02        05        036              0.032000       0.419678       0.000000       0.151880   -9999.000000   -9999.000000       0.034300   -9999.000000
56192     56192     gansu          104.6700       32.9500          108       139     2012      02        06        037              0.031913       0.653442       0.000000       0.155576   -9999.000000   -9999.000000       0.027500       0.245000
56192     56192     gansu          104.6700       32.9500          108       139     2012      02        07        038              0.031417       1.422455       0.000000       0.161703   -9999.000000   -9999.000000       0.023600       0.106000
56192     56192     gansu          104.6700       32.9500          108       139     2012      02        08        039              0.031125       0.884308       0.000000       0.156186   -9999.000000   -9999.000000       0.031600       0.057000
56192     56192     gansu          104.6700       32.9500          108       139     2012      02        09        040              0.031000       0.418823       0.000000       0.150023   -9999.000000   -9999.000000   -9999.000000       0.024000
56192     56192     gansu          104.6700       32.9500          108       139     2012      02        10        041              0.030667      -0.806854       0.000000       0.136217   -9999.000000   -9999.000000   -9999.000000   -9999.000000
56192     56192     gansu          104.6700       32.9500          108       139     2012      02        11        042              0.030250      -1.024536       0.000000       0.131713   -9999.000000   -9999.000000       0.028400       0.055000
56192     56192     gansu          104.6700       32.9500          108       139     2012      02        12        043              0.030000      -0.527832       0.000000       0.136260   -9999.000000   -9999.000000   -9999.000000   -9999.000000
56192     56192     gansu          104.6700       32.9500          108       139     2012      02        13        044              0.030000      -0.042511       0.000000       0.142911   -9999.000000   -9999.000000       0.026100       0.002000
56192     56192     gansu          104.6700       32.9500          108       139     2012      02        14        045              0.030000      -0.540588       0.000000       0.134417   -9999.000000   -9999.000000   -9999.000000       0.071000
56192     56192     gansu          104.6700       32.9500          108       139     2012      02        15        046              0.030000      -0.032440       0.000000       0.143155   -9999.000000   -9999.000000   -9999.000000   -9999.000000
56192     56192     gansu          104.6700       32.9500          108       139     2012      02        16        047              0.029739      -0.012543       0.000000       0.144091   -9999.000000   -9999.000000   -9999.000000       0.139000
56192     56192     gansu          104.6700       32.9500          108       139     2012      02        17        048              0.029042       0.030853       0.000000       0.144325   -9999.000000   -9999.000000       0.026200   -9999.000000
56192     56192     gansu          104.6700       32.9500          108       139     2012      02        18        049              0.029208      -0.033722       0.000000       0.143523   -9999.000000   -9999.000000       0.021800       0.046000
56192     56192     gansu          104.6700       32.9500          108       139     2012      02        19        050              0.029000      -0.363312       0.000000       0.138922   -9999.000000   -9999.000000       0.032200   -9999.000000
56192     56192     gansu          104.6700       32.9500          108       139     2012      02        20        051              0.029000      -0.026581       0.000000       0.142259   -9999.000000   -9999.000000       0.034500   -9999.000000
56192     56192     gansu          104.6700       32.9500          108       139     2012      02        21        052              0.029667      -0.288635       0.382917       0.138603       0.081000   -9999.000000   -9999.000000       0.192000
56192     56192     gansu          104.6700       32.9500          108       139     2012      02        22        053              0.029625       2.947449       0.331419       0.174310       0.080000   -9999.000000       0.028000   -9999.000000
56192     56192     gansu          104.6700       32.9500          108       139     2012      02        23        054              0.029500       3.822693       2.178993       0.182011       0.080000   -9999.000000       0.037500       0.267000
56192     56192     gansu          104.6700       32.9500          108       139     2012      02        24        055              0.029000       3.699738       0.000000       0.185849   -9999.000000   -9999.000000       0.029100   -9999.000000
56192     56192     gansu          104.6700       32.9500          108       139     2012      02        25        056              0.029000       1.201111       0.000000       0.162853   -9999.000000   -9999.000000       0.032200   -9999.000000
56192     56192     gansu          104.6700       32.9500          108       139     2012      02        26        057              0.028917       0.898438       0.000000       0.153504   -9999.000000   -9999.000000   -9999.000000       0.330000
56192     56192     gansu          104.6700       32.9500          108       139     2012      02        27        058              0.028417       1.864410       0.000000       0.161797       0.078000   -9999.000000   -9999.000000   -9999.000000
56192     56192     gansu          104.6700       32.9500          108       139     2012      02        28        059              0.028000       3.266724       0.000000       0.170095   -9999.000000   -9999.000000   -9999.000000       0.188000
56192     56192     gansu          104.6700       32.9500          108       139     2012      02        29        060              0.000000   -9999.000000       0.380438   -9999.000000   -9999.000000   -9999.000000   -9999.000000   -9999.000000
56192     56192     gansu          104.6700       32.9500          108       139     2012      03        01        061              0.028167       1.141388       0.277486       0.161025   -9999.000000   -9999.000000       0.036400       0.406000
56192     56192     gansu          104.6700       32.9500          108       139     2012      03        02        062              0.028000       3.606445       0.680841       0.179546   -9999.000000   -9999.000000       0.033700       0.214000
56192     56192     gansu          104.6700       32.9500          108       139     2012      03        03        063              0.027625       2.945557       0.145013       0.179504   -9999.000000   -9999.000000   -9999.000000   -9999.000000
56192     56192     gansu          104.6700       32.9500          108       139     2012      03        04        064              0.027167       2.412048       0.566286       0.183096       0.094000   -9999.000000   -9999.000000       0.283000
56192     56192     gansu          104.6700       32.9500          108       139     2012      03        05        065              0.027000       3.263367       0.054271       0.192093   -9999.000000   -9999.000000       0.031900   -9999.000000
56192     56192     gansu          104.6700       32.9500          108       139     2012      03        06        066              0.027217       2.208984       0.102077       0.180747   -9999.000000   -9999.000000       0.029400       0.368000
56192     56192     gansu          104.6700       32.9500          108       139     2012      03        07        067              0.000000       3.326935       1.285239       0.182289   -9999.000000   -9999.000000       0.038100       0.285000
56192     56192     gansu          104.6700       32.9500          108       139     2012      03        08        068              0.147000       2.473602       0.886503       0.178940   -9999.000000   -9999.000000       0.035100       0.263000
56192     56192     gansu          104.6700       32.9500          108       139     2012      03        09        069              0.147000       2.324890       0.563006       0.190036   -9999.000000   -9999.000000   -9999.000000       0.262000
56192     56192     gansu          104.6700       32.9500          108       139     2012      03        10        070              0.147167       2.912201       0.000000       0.192144   -9999.000000   -9999.000000       0.023300   -9999.000000
56192     56192     gansu          104.6700       32.9500          108       139     2012      03        11        071              0.147000       4.764191       0.161080       0.195118   -9999.000000   -9999.000000       0.033200       0.408000
56192     56192     gansu          104.6700       32.9500          108       139     2012      03        12        072              0.146857       4.935211       0.000000       0.197608   -9999.000000   -9999.000000       0.033800   -9999.000000
56192     56192     gansu          104.6700       32.9500          108       139     2012      03        13        073              0.146792       4.578613       0.198007       0.197724       0.095000   -9999.000000       0.049400       0.369000
56192     56192     gansu          104.6700       32.9500          108       139     2012      03        14        074              0.146292       8.304749       3.694375       0.201831       0.084000   -9999.000000   -9999.000000       0.417000
56192     56192     gansu          104.6700       32.9500          108       139     2012      03        15        075              0.146391       4.801392       1.055341       0.214106       0.090000   -9999.000000   -9999.000000   -9999.000000
56192     56192     gansu          104.6700       32.9500          108       139     2012      03        16        076              0.146818       5.420593       0.058893       0.226600   -9999.000000   -9999.000000       0.042900       0.477000
56192     56192     gansu          104.6700       32.9500          108       139     2012      03        17        077              0.147500       7.391541       0.638891       0.222409   -9999.000000   -9999.000000       0.038100   -9999.000000
56192     56192     gansu          104.6700       32.9500          108       139     2012      03        18        078              0.147783      11.291382       0.000000       0.213769       0.097000   -9999.000000       0.049200       0.353000
56192     56192     gansu          104.6700       32.9500          108       139     2012      03        19        079              0.147833      11.871826       0.203480       0.207933       0.096000   -9999.000000       0.052200   -9999.000000
56192     56192     gansu          104.6700       32.9500          108       139     2012      03        20        080              0.147375      13.848511       0.135933       0.201600       0.088000   -9999.000000   -9999.000000   -9999.000000
56192     56192     gansu          104.6700       32.9500          108       139     2012      03        21        081              0.146478      12.327209       0.064159       0.200545       0.113000   -9999.000000   -9999.000000       0.433000
56192     56192     gansu          104.6700       32.9500          108       139     2012      03        22        082              0.145792       8.614258       0.133376       0.201899   -9999.000000   -9999.000000       0.049000   -9999.000000
56192     56192     gansu          104.6700       32.9500          108       139     2012      03        23        083              0.145500       5.076538       0.880318       0.192530   -9999.000000   -9999.000000       0.041400       0.237000
56192     56192     gansu          104.6700       32.9500          108       139     2012      03        24        084              0.145591       6.729614       0.000000       0.190052       0.101000   -9999.000000       0.053400   -9999.000000
56192     56192     gansu          104.6700       32.9500          108       139     2012      03        25        085              0.000000       8.568787       0.000000       0.190777       0.105000   -9999.000000       0.052800   -9999.000000
56192     56192     gansu          104.6700       32.9500          108       139     2012      03        26        086              0.145708      11.204956       0.000000       0.187573       0.114000   -9999.000000   -9999.000000       0.552000
56192     56192     gansu          104.6700       32.9500          108       139     2012      03        27        087              0.145167      12.983765       1.932147       0.182407   -9999.000000   -9999.000000       0.044600   -9999.000000
56192     56192     gansu          104.6700       32.9500          108       139     2012      03        28        088              0.144792      12.055206       2.885831       0.185045   -9999.000000   -9999.000000       0.045300       0.467000
56192     56192     gansu          104.6700       32.9500          108       139     2012      03        29        089              0.144500      10.208679       0.323947       0.225677       0.109000   -9999.000000       0.042900   -9999.000000
56192     56192     gansu          104.6700       32.9500          108       139     2012      03        30        090              0.144250      10.661072       0.516895       0.212733       0.101000   -9999.000000       0.043500       0.533000
56192     56192     gansu          104.6700       32.9500          108       139     2012      03        31        091              0.144750       8.555511       0.690308       0.211951       0.111000   -9999.000000   -9999.000000       0.464000
56192     56192     gansu          104.6700       32.9500          108       139     2012      04        01        092              0.144833      12.348083       0.157968       0.200210   -9999.000000   -9999.000000   -9999.000000   -9999.000000
56192     56192     gansu          104.6700       32.9500          108       139     2012      04        02        093              0.144375      14.260651       0.000000       0.191114   -9999.000000   -9999.000000       0.049400       0.392000
56192     56192     gansu          104.6700       32.9500          108       139     2012      04        03        094              0.144083      13.478271       0.066496       0.184101       0.106000   -9999.000000       0.045600   -9999.000000
56192     56192     gansu          104.6700       32.9500          108       139     2012      04        04        095              0.144000      14.544220       0.176320       0.175884       0.103500   -9999.000000       0.049200       0.521000
56192     56192     gansu          104.6700       32.9500          108       139     2012      04        05        096              0.143000      16.353088       0.320463       0.168451       0.119000   -9999.000000       0.051200       0.413000
56192     56192     gansu          104.6700       32.9500          108       139     2012      04        06        097              0.142375      12.646698       0.179041       0.171714   -9999.000000   -9999.000000   -9999.000000       0.381000
56192     56192     gansu          104.6700       32.9500          108       139     2012      04        07        098              0.141833      11.304901       0.000000       0.172747       0.088000   -9999.000000   -9999.000000       0.376000
56192     56192     gansu          104.6700       32.9500          108       139     2012      04        08        099              0.141833      11.839172       0.000000       0.172409       0.101000   -9999.000000       0.047200   -9999.000000
56192     56192     gansu          104.6700       32.9500          108       139     2012      04        09        100              0.141583      13.239410       0.000000       0.168820       0.110000   -9999.000000       0.053200       0.451000
56192     56192     gansu          104.6700       32.9500          108       139     2012      04        10        101              0.141750      14.215820       2.742384       0.164732       0.103000   -9999.000000       0.051000   -9999.000000
56192     56192     gansu          104.6700       32.9500          108       139     2012      04        11        102              0.141833      17.151642       7.356786       0.175144       0.145000   -9999.000000       0.056300       0.664000
56192     56192     gansu          104.6700       32.9500          108       139     2012      04        12        103              0.140625      16.198090       0.515280       0.218117   -9999.000000   -9999.000000   -9999.000000       0.347000
56192     56192     gansu          104.6700       32.9500          108       139     2012      04        13        104              0.140500      11.244751       0.030020       0.228622       0.123000   -9999.000000       0.055500   -9999.000000
56192     56192     gansu          104.6700       32.9500          108       139     2012      04        14        105              0.141458      11.374054       0.392107       0.213079       0.130000   -9999.000000       0.055100       0.542000
56192     56192     gansu          104.6700       32.9500          108       139     2012      04        15        106              0.142000      13.528107       1.728148       0.205126       0.133000   -9999.000000       0.057500   -9999.000000
56192     56192     gansu          104.6700       32.9500          108       139     2012      04        16        107              0.142292      13.010071       2.510939       0.209677       0.144000   -9999.000000       0.055600       0.712000
56192     56192     gansu          104.6700       32.9500          108       139     2012      04        17        108              0.149000       9.622559       0.000000       0.232037   -9999.000000   -9999.000000   -9999.000000   -9999.000000
56192     56192     gansu          104.6700       32.9500          108       139     2012      04        18        109              0.155500      11.339172       2.013369       0.218921       0.118000   -9999.000000   -9999.000000   -9999.000000
56192     56192     gansu          104.6700       32.9500          108       139     2012      04        19        110              0.157375      14.595154       2.435679       0.208775       0.133000   -9999.000000       0.053800       0.711000
56192     56192     gansu          104.6700       32.9500          108       139     2012      04        20        111              0.157750      11.003998       1.236404       0.225759       0.129000   -9999.000000       0.051500   -9999.000000
56192     56192     gansu          104.6700       32.9500          108       139     2012      04        21        112              0.156375      14.124756       2.782230       0.220648       0.153000   -9999.000000       0.049100       0.439000
56192     56192     gansu          104.6700       32.9500          108       139     2012      04        22        113              0.153542      16.703186       0.656877       0.222893   -9999.000000   -9999.000000   -9999.000000   -9999.000000
56192     56192     gansu          104.6700       32.9500          108       139     2012      04        23        114              0.152042      19.169861      10.311547       0.208745       0.147000   -9999.000000   -9999.000000   -9999.000000
56192     56192     gansu          104.6700       32.9500          108       139     2012      04        24        115              0.174833      15.707581       2.753320       0.238906       0.146000   -9999.000000       0.062800       0.697000
56192     56192     gansu          104.6700       32.9500          108       139     2012      04        25        116              0.000000      16.372009       0.000000       0.248727       0.140000   -9999.000000       0.061400   -9999.000000
56192     56192     gansu          104.6700       32.9500          108       139     2012      04        26        117              0.168250      16.313324       0.000000       0.231342       0.138000   -9999.000000       0.061300       0.572000
56192     56192     gansu          104.6700       32.9500          108       139     2012      04        27        118              0.160000      17.196716       1.972901       0.216408   -9999.000000   -9999.000000       0.065600   -9999.000000
56192     56192     gansu          104.6700       32.9500          108       139     2012      04        28        119              0.157042      18.020813       3.195337       0.221246       0.129000   -9999.000000       0.053700       0.589000
56192     56192     gansu          104.6700       32.9500          108       139     2012      04        29        120              0.156043      18.473450       0.000000       0.226139       0.137500   -9999.000000   -9999.000000       0.737000
56192     56192     gansu          104.6700       32.9500          108       139     2012      04        30        121              0.154458      18.114746       3.741187       0.217542       0.134000   -9999.000000       0.041300   -9999.000000
56192     56192     gansu          104.6700       32.9500          108       139     2012      05        01        122              0.154375      15.515747       0.314739       0.226487       0.165000   -9999.000000       0.042900       0.605000
56192     56192     gansu          104.6700       32.9500          108       139     2012      05        02        123              0.154833      15.816895       1.316431       0.230038       0.205000   -9999.000000       0.045200   -9999.000000
56192     56192     gansu          104.6700       32.9500          108       139     2012      05        03        124              0.155333      14.235626       1.239665       0.227932       0.176000   -9999.000000       0.044400       0.884000
56192     56192     gansu          104.6700       32.9500          108       139     2012      05        04        125              0.156792      14.901031       0.391784       0.232006       0.159000   -9999.000000   -9999.000000       0.849000
56192     56192     gansu          104.6700       32.9500          108       139     2012      05        05        126              0.157042      15.320709       0.000000       0.229690       0.172000   -9999.000000   -9999.000000       0.649000
56192     56192     gansu          104.6700       32.9500          108       139     2012      05        06        127              0.157625      14.401703       0.225791       0.224124       0.180000   -9999.000000       0.040700       0.662000
56192     56192     gansu          104.6700       32.9500          108       139     2012      05        07        128              0.158625      15.112183       1.481536       0.220672   -9999.000000   -9999.000000       0.077800   -9999.000000
56192     56192     gansu          104.6700       32.9500          108       139     2012      05        08        129              0.156875      18.896149       0.945355       0.217401   -9999.000000   -9999.000000       0.071400       0.751000
56192     56192     gansu          104.6700       32.9500          108       139     2012      05        09        130              0.156042      16.904480       0.172749       0.223243   -9999.000000   -9999.000000       0.075800   -9999.000000
56192     56192     gansu          104.6700       32.9500          108       139     2012      05        10        131              0.154125      20.836151       1.379174       0.210635       0.161000   -9999.000000   -9999.000000       0.606000
56192     56192     gansu          104.6700       32.9500          108       139     2012      05        11        132              0.151708      20.073761       2.323075       0.207827       0.174500   -9999.000000       0.081500       0.773000
56192     56192     gansu          104.6700       32.9500          108       139     2012      05        12        133              0.149333      18.326660       0.153904       0.218964       0.186000   -9999.000000       0.073100   -9999.000000
56192     56192     gansu          104.6700       32.9500          108       139     2012      05        13        134              0.147250      17.371918       3.899719       0.209715   -9999.000000   -9999.000000       0.079100       0.735000
56192     56192     gansu          104.6700       32.9500          108       139     2012      05        14        135              0.147250      12.218536       0.000000       0.229738       0.156000   -9999.000000       0.081900   -9999.000000
56192     56192     gansu          104.6700       32.9500          108       139     2012      05        15        136              0.146750      16.391510       0.000000       0.214238       0.156000   -9999.000000       0.079800       0.549000
56192     56192     gansu          104.6700       32.9500          108       139     2012      05        16        137              0.145500      18.358551       0.373030       0.200479       0.169500   -9999.000000   -9999.000000   -9999.000000
56192     56192     gansu          104.6700       32.9500          108       139     2012      05        17        138              0.144458      18.496155       0.434004       0.194497       0.167000   -9999.000000       0.078000   -9999.000000
56192     56192     gansu          104.6700       32.9500          108       139     2012      05        18        139              0.143958      17.986603       0.108139       0.191035   -9999.000000   -9999.000000       0.080000       0.559000
56192     56192     gansu          104.6700       32.9500          108       139     2012      05        19        140              0.143708      19.865601       0.290770       0.184278       0.146000   -9999.000000       0.077900   -9999.000000
56192     56192     gansu          104.6700       32.9500          108       139     2012      05        20        141              0.142375      23.393402       1.004107       0.171604       0.163000   -9999.000000       0.082200       0.530000
56192     56192     gansu          104.6700       32.9500          108       139     2012      05        21        142              0.141000      19.454498       4.615025       0.172732       0.318000   -9999.000000   -9999.000000   -9999.000000
56192     56192     gansu          104.6700       32.9500          108       139     2012      05        22        143              0.141708      16.474365       1.739941       0.208106       0.300500   -9999.000000   -9999.000000   -9999.000000
56192     56192     gansu          104.6700       32.9500          108       139     2012      05        23        144              0.145083      15.110504       6.720553       0.224274   -9999.000000   -9999.000000       0.122900       0.984000
56192     56192     gansu          104.6700       32.9500          108       139     2012      05        24        145              0.215167      14.903839       3.797943       0.229047   -9999.000000   -9999.000000       0.120600   -9999.000000
56192     56192     gansu          104.6700       32.9500          108       139     2012      05        25        146              0.000000      14.067383       1.038001       0.250653       0.257000   -9999.000000       0.121400       0.727000
56192     56192     gansu          104.6700       32.9500          108       139     2012      05        26        147              0.221917      14.286499       1.440867       0.242520       0.267500   -9999.000000       0.112100   -9999.000000
56192     56192     gansu          104.6700       32.9500          108       139     2012      05        27        148              0.211000      18.930695       0.695396       0.228646       0.279000   -9999.000000   -9999.000000       0.869000
56192     56192     gansu          104.6700       32.9500          108       139     2012      05        28        149              0.223625      16.601318      10.435357       0.228775       0.309000   -9999.000000   -9999.000000       1.000000
56192     56192     gansu          104.6700       32.9500          108       139     2012      05        29        150              0.248792      16.113861       0.875247       0.257071   -9999.000000   -9999.000000       0.114100   -9999.000000
56192     56192     gansu          104.6700       32.9500          108       139     2012      05        30        151              0.225542      18.979797       2.857742       0.251360   -9999.000000   -9999.000000       0.117400   -9999.000000
56192     56192     gansu          104.6700       32.9500          108       139     2012      05        31        152              0.211625      19.497711       0.438032       0.237636       0.295500   -9999.000000       0.123300   -9999.000000
56192     56192     gansu          104.6700       32.9500          108       139     2012      06        01        153              0.202333      15.068481       0.000000       0.245335       0.235500   -9999.000000   -9999.000000       0.515000
56192     56192     gansu          104.6700       32.9500          108       139     2012      06        02        154              0.193208      18.676086       0.260746       0.229201   -9999.000000   -9999.000000   -9999.000000       0.697000
56192     56192     gansu          104.6700       32.9500          108       139     2012      06        03        155              0.187458      15.558563       0.425635       0.226814   -9999.000000   -9999.000000   -9999.000000       0.606000
56192     56192     gansu          104.6700       32.9500          108       139     2012      06        04        156              0.182792      15.737000       7.278748       0.226273   -9999.000000   -9999.000000       0.134100       0.565000
56192     56192     gansu          104.6700       32.9500          108       139     2012      06        05        157              0.178208      15.404816       0.810719       0.241651       0.239500   -9999.000000       0.132400   -9999.000000
56192     56192     gansu          104.6700       32.9500          108       139     2012      06        06        158              0.174083      15.585815       1.235133       0.256649       0.243000   -9999.000000       0.132500       0.671000
56192     56192     gansu          104.6700       32.9500          108       139     2012      06        07        159              0.169250      16.028168       1.116298       0.247196       0.235000   -9999.000000   -9999.000000   -9999.000000
56192     56192     gansu          104.6700       32.9500          108       139     2012      06        08        160              0.165792      19.157074       5.307235       0.239368       0.278000   -9999.000000   -9999.000000       0.882000
56192     56192     gansu          104.6700       32.9500          108       139     2012      06        09        161              0.164458      17.330139       1.611640       0.264294   -9999.000000   -9999.000000       0.122000       0.506000
56192     56192     gansu          104.6700       32.9500          108       139     2012      06        10        162              0.161208      20.452728       0.391525       0.240821       0.196000   -9999.000000       0.122500   -9999.000000
56192     56192     gansu          104.6700       32.9500          108       139     2012      06        11        163              0.000000      19.723633       0.000000       0.231078       0.219000   -9999.000000       0.091600       0.603000
56192     56192     gansu          104.6700       32.9500          108       139     2012      06        12        164              0.154375      19.189819       0.000000       0.223991       0.242000   -9999.000000       0.092000   -9999.000000
56192     56192     gansu          104.6700       32.9500          108       139     2012      06        13        165              0.150875      19.949860       2.119342       0.214258       0.283000   -9999.000000   -9999.000000       0.625000
56192     56192     gansu          104.6700       32.9500          108       139     2012      06        14        166              0.148708      20.077637       0.509399       0.219012   -9999.000000   -9999.000000       0.087900   -9999.000000
56192     56192     gansu          104.6700       32.9500          108       139     2012      06        15        167              0.147417      20.045837       0.832148       0.215922       0.219000   -9999.000000       0.090700   -9999.000000
56192     56192     gansu          104.6700       32.9500          108       139     2012      06        16        168              0.147333      17.252747       0.129335       0.216624       0.247000   -9999.000000       0.090200       0.576000
56192     56192     gansu          104.6700       32.9500          108       139     2012      06        17        169              0.147250      17.949219       0.329083       0.208389       0.238000   -9999.000000       0.094700   -9999.000000
56192     56192     gansu          104.6700       32.9500          108       139     2012      06        18        170              0.146583      18.641235       0.444697       0.201805       0.253000   -9999.000000   -9999.000000       0.473000
56192     56192     gansu          104.6700       32.9500          108       139     2012      06        19        171              0.146125      20.121216       0.988505       0.197048   -9999.000000   -9999.000000   -9999.000000   -9999.000000
56192     56192     gansu          104.6700       32.9500          108       139     2012      06        20        172              0.145333      21.436707       0.403838       0.194866       0.201000   -9999.000000       0.156100   -9999.000000
56192     56192     gansu          104.6700       32.9500          108       139     2012      06        21        173              0.144167      21.550598       0.000000       0.188165       0.263500   -9999.000000       0.148100       0.573000
56192     56192     gansu          104.6700       32.9500          108       139     2012      06        22        174              0.143792      22.195282       0.000000       0.177843       0.296000   -9999.000000       0.148700   -9999.000000
56192     56192     gansu          104.6700       32.9500          108       139     2012      06        23        175              0.142833      23.683014       1.787554       0.167291       0.288000   -9999.000000       0.132900       0.549000
56192     56192     gansu          104.6700       32.9500          108       139     2012      06        24        176              0.141417      22.978851       5.094123       0.160739   -9999.000000   -9999.000000   -9999.000000   -9999.000000
56192     56192     gansu          104.6700       32.9500          108       139     2012      06        25        177              0.140042      20.782867       3.652309       0.190556       0.308000   -9999.000000   -9999.000000       0.866000
56192     56192     gansu          104.6700       32.9500          108       139     2012      06        26        178              0.139917      19.646820      17.893665       0.221744       0.354500   -9999.000000       0.069600       1.000000
56192     56192     gansu          104.6700       32.9500          108       139     2012      06        27        179              0.142042      18.951294       8.077012       0.265805       0.361500   -9999.000000       0.072300   -9999.000000
56192     56192     gansu          104.6700       32.9500          108       139     2012      06        28        180              0.146917      18.954956      14.638107       0.287655       0.318000   -9999.000000       0.070100       0.857000
56192     56192     gansu          104.6700       32.9500          108       139     2012      06        29        181              0.155833      19.484039       3.305508       0.288146       0.364000   -9999.000000       0.067800   -9999.000000
56192     56192     gansu          104.6700       32.9500          108       139     2012      06        30        182              0.170417      19.438873       4.350387       0.292790       0.289000   -9999.000000   -9999.000000   -9999.000000
56192     56192     gansu          104.6700       32.9500          108       139     2012      07        01        183              0.185042      19.772491       7.083674       0.283495   -9999.000000   -9999.000000       0.067000       0.843000
56192     56192     gansu          104.6700       32.9500          108       139     2012      07        02        184              0.190083      19.987274       4.241699       0.284230       0.258500   -9999.000000       0.174500       1.000000
56192     56192     gansu          104.6700       32.9500          108       139     2012      07        03        185              0.201458      20.227539      10.943643       0.288448       0.269000   -9999.000000       0.174400       1.000000
56192     56192     gansu          104.6700       32.9500          108       139     2012      07        04        186              0.234083      21.694946       1.033861       0.289765       0.287000   -9999.000000       0.167300   -9999.000000
56192     56192     gansu          104.6700       32.9500          108       139     2012      07        05        187              0.219625      21.622223       0.163179       0.282041   -9999.000000   -9999.000000   -9999.000000       0.678000
56192     56192     gansu          104.6700       32.9500          108       139     2012      07        06        188              0.207042      22.851898       5.872447       0.264854   -9999.000000   -9999.000000   -9999.000000   -9999.000000
56192     56192     gansu          104.6700       32.9500          108       139     2012      07        07        189              0.200292      20.302277       0.984142       0.276090   -9999.000000   -9999.000000       0.182900       0.871000
56192     56192     gansu          104.6700       32.9500          108       139     2012      07        08        190              0.198000      20.301300       1.883417       0.270865       0.259500   -9999.000000       0.181800       0.985000
56192     56192     gansu          104.6700       32.9500          108       139     2012      07        09        191              0.200792      19.825195       1.401969       0.270338       0.304000   -9999.000000       0.096600   -9999.000000
56192     56192     gansu          104.6700       32.9500          108       139     2012      07        10        192              0.204708      19.890259       0.000000       0.268092   -9999.000000   -9999.000000       0.093900       0.753000
56192     56192     gansu          104.6700       32.9500          108       139     2012      07        11        193              0.199333      23.353912       0.044250       0.254030       0.393000   -9999.000000   -9999.000000   -9999.000000
56192     56192     gansu          104.6700       32.9500          108       139     2012      07        12        194              0.194042      20.942749       0.127188       0.248579       0.392500   -9999.000000       0.092800       0.545000
56192     56192     gansu          104.6700       32.9500          108       139     2012      07        13        195              0.188750      21.281952       2.114278       0.243060       0.412000   -9999.000000       0.090000   -9999.000000
56192     56192     gansu          104.6700       32.9500          108       139     2012      07        14        196              0.182500      22.881592       5.645195       0.240426   -9999.000000   -9999.000000       0.093500   -9999.000000
56192     56192     gansu          104.6700       32.9500          108       139     2012      07        15        197              0.181958      20.886688       0.077823       0.262685       0.474000   -9999.000000       0.095600       0.679000
56192     56192     gansu          104.6700       32.9500          108       139     2012      07        16        198              0.180333      21.693481       0.227802       0.251930       0.407000   -9999.000000       0.078900   -9999.000000
56192     56192     gansu          104.6700       32.9500          108       139     2012      07        17        199              0.241792      19.472992      15.732121       0.246606       0.475000   -9999.000000   -9999.000000       0.991000
56192     56192     gansu          104.6700       32.9500          108       139     2012      07        18        200              0.249875      18.546112       1.535310       0.295813       0.479000   -9999.000000       0.076200   -9999.000000
56192     56192     gansu          104.6700       32.9500          108       139     2012      07        19        201              0.236750      19.108673       1.451278       0.274199       0.467000   -9999.000000       0.076100   -9999.000000
56192     56192     gansu          104.6700       32.9500          108       139     2012      07        20        202              0.227667      19.487732       2.293616       0.273743       0.495000   -9999.000000       0.077800       0.945000
56192     56192     gansu          104.6700       32.9500          108       139     2012      07        21        203              0.266682      20.063904       5.395284       0.267703   -9999.000000   -9999.000000       0.080600   -9999.000000
56192     56192     gansu          104.6700       32.9500          108       139     2012      07        22        204              0.251208      20.081970       2.567840       0.283001       0.500000   -9999.000000   -9999.000000       0.799000
56192     56192     gansu          104.6700       32.9500          108       139     2012      07        23        205              0.249792      21.464417       2.886816       0.267969       0.500000   -9999.000000   -9999.000000   -9999.000000
56192     56192     gansu          104.6700       32.9500          108       139     2012      07        24        206              0.246417      18.625671       1.710005       0.273555       0.500000   -9999.000000       0.090600       0.906000
56192     56192     gansu          104.6700       32.9500          108       139     2012      07        25        207              0.232750      20.669830       2.911573       0.266940       0.500000   -9999.000000       0.089600       0.675000
56192     56192     gansu          104.6700       32.9500          108       139     2012      07        26        208              0.219667      21.954163       0.798716       0.267447   -9999.000000   -9999.000000       0.091200   -9999.000000
56192     56192     gansu          104.6700       32.9500          108       139     2012      07        27        209              0.208042      22.413788       0.128491       0.261258       0.500000   -9999.000000       0.093000       0.590000
56192     56192     gansu          104.6700       32.9500          108       139     2012      07        28        210              0.198083      21.670135       0.000000       0.253569       0.500000   -9999.000000   -9999.000000   -9999.000000
56192     56192     gansu          104.6700       32.9500          108       139     2012      07        29        211              0.186542      23.231720       0.000000       0.244604       0.500000   -9999.000000       0.090000       0.699000
56192     56192     gansu          104.6700       32.9500          108       139     2012      07        30        212              0.178000      23.266785       1.156317       0.237234       0.500000   -9999.000000       0.084400       0.881000
56192     56192     gansu          104.6700       32.9500          108       139     2012      07        31        213              0.172667      21.062805       1.637111       0.240497   -9999.000000   -9999.000000       0.085300       0.609000
56192     56192     gansu          104.6700       32.9500          108       139     2012      08        01        214              0.168208      19.772644       0.437170       0.242773   -9999.000000   -9999.000000       0.089700       0.613000
56192     56192     gansu          104.6700       32.9500          108       139     2012      08        02        215              0.163417      19.475189       0.000000       0.244678       0.385000   -9999.000000   -9999.000000   -9999.000000
56192     56192     gansu          104.6700       32.9500          108       139     2012      08        03        216              0.157333      23.030548       0.000000       0.230746       0.403500   -9999.000000   -9999.000000       0.631000
56192     56192     gansu          104.6700       32.9500          108       139     2012      08        04        217              0.152208      23.111115       0.073600       0.223635       0.423500   -9999.000000       0.089800   -9999.000000
56192     56192     gansu          104.6700       32.9500          108       139     2012      08        05        218              0.149500      22.919769       3.186154       0.217931   -9999.000000   -9999.000000       0.088800       0.627000
56192     56192     gansu          104.6700       32.9500          108       139     2012      08        06        219              0.148208      21.343658       1.994467       0.236425   -9999.000000   -9999.000000       0.092400       0.552000
56192     56192     gansu          104.6700       32.9500          108       139     2012      08        07        220              0.147208      21.805206       0.000000       0.239504       0.376000   -9999.000000       0.092900   -9999.000000
56192     56192     gansu          104.6700       32.9500          108       139     2012      08        08        221              0.146292      22.369720       1.381554       0.227906       0.413000   -9999.000000   -9999.000000       0.665000
56192     56192     gansu          104.6700       32.9500          108       139     2012      08        09        222              0.144875      23.960724       0.069333       0.220292       0.423500   -9999.000000   -9999.000000   -9999.000000
56192     56192     gansu          104.6700       32.9500          108       139     2012      08        10        223              0.143458      24.692078       0.000000       0.215062       0.387000   -9999.000000       0.088800       0.497000
56192     56192     gansu          104.6700       32.9500          108       139     2012      08        11        224              0.142167      24.491028       0.503410       0.202894       0.303000   -9999.000000       0.089000   -9999.000000
56192     56192     gansu          104.6700       32.9500          108       139     2012      08        12        225              0.141458      24.048737       7.153461       0.199883   -9999.000000   -9999.000000       0.089200   -9999.000000
56192     56192     gansu          104.6700       32.9500          108       139     2012      08        13        226              0.140250      24.959381       4.982607       0.220260       0.265000   -9999.000000       0.097100       0.687000
56192     56192     gansu          104.6700       32.9500          108       139     2012      08        14        227              0.139000      23.874817       3.807102       0.236479       0.303000   -9999.000000   -9999.000000   -9999.000000
56192     56192     gansu          104.6700       32.9500          108       139     2012      08        15        228              0.139292      22.252197       0.000000       0.261111       0.286500   -9999.000000       0.099100       0.586000
56192     56192     gansu          104.6700       32.9500          108       139     2012      08        16        229              0.139958      24.182465       0.000000       0.235056       0.304000   -9999.000000       0.094900   -9999.000000
56192     56192     gansu          104.6700       32.9500          108       139     2012      08        17        230              0.139208      23.612457      16.064892       0.223250   -9999.000000   -9999.000000       0.107100   -9999.000000
56192     56192     gansu          104.6700       32.9500          108       139     2012      08        18        231              0.139000      21.873199       3.385825       0.262587       0.306000   -9999.000000       0.111100       1.000000
56192     56192     gansu          104.6700       32.9500          108       139     2012      08        19        232              0.140500      19.838898       3.318659       0.278819       0.281000   -9999.000000   -9999.000000   -9999.000000
56192     56192     gansu          104.6700       32.9500          108       139     2012      08        20        233              0.146458      19.557587       0.021860       0.271633       0.279000   -9999.000000   -9999.000000       0.725000
56192     56192     gansu          104.6700       32.9500          108       139     2012      08        21        234              0.152083      21.246155       2.734716       0.258314       0.482000   -9999.000000       0.093000   -9999.000000
56192     56192     gansu          104.6700       32.9500          108       139     2012      08        22        235              0.153375      20.558258       0.000000       0.247846       0.492000   -9999.000000       0.094300   -9999.000000
56192     56192     gansu          104.6700       32.9500          108       139     2012      08        23        236              0.152292      19.125824       0.263013       0.241169       0.421000   -9999.000000       0.091700       0.617000
56192     56192     gansu          104.6700       32.9500          108       139     2012      08        24        237              0.150375      20.278931       1.135109       0.233708   -9999.000000   -9999.000000       0.087700   -9999.000000
56192     56192     gansu          104.6700       32.9500          108       139     2012      08        25        238              0.000000      20.037231       1.255015       0.228534       0.437000   -9999.000000   -9999.000000       0.638000
56192     56192     gansu          104.6700       32.9500          108       139     2012      08        26        239              0.148333      20.197693       0.000000       0.229117       0.414500   -9999.000000   -9999.000000   -9999.000000
56192     56192     gansu          104.6700       32.9500          108       139     2012      08        27        240              0.146667      22.156677       1.550318       0.220125       0.481000   -9999.000000       0.095700       0.838000
56192     56192     gansu          104.6700       32.9500          108       139     2012      08        28        241              0.147333      19.199036       0.000000       0.226325   -9999.000000   -9999.000000       0.094300       0.627000
56192     56192     gansu          104.6700       32.9500          108       139     2012      08        29        242              0.146958      21.091522       0.182759       0.217787       0.423000   -9999.000000       0.095200       0.522000
56192     56192     gansu          104.6700       32.9500          108       139     2012      08        30        243              0.145417      21.106140       2.342456       0.210281       0.484500   -9999.000000       0.105600       0.920000
56192     56192     gansu          104.6700       32.9500          108       139     2012      08        31        244              0.144708      19.776215       5.587296       0.218916       0.482000   -9999.000000   -9999.000000   -9999.000000
56192     56192     gansu          104.6700       32.9500          108       139     2012      09        01        245              0.144458      19.828583       3.349405       0.238953       0.280000   -9999.000000       0.102800       0.763000
56192     56192     gansu          104.6700       32.9500          108       139     2012      09        02        246              0.145750      18.705170       0.000000       0.259195   -9999.000000   -9999.000000       0.094500   -9999.000000
56192     56192     gansu          104.6700       32.9500          108       139     2012      09        03        247              0.146667      20.509949       0.360302       0.236018       0.239000   -9999.000000       0.126500       0.664000
56192     56192     gansu          104.6700       32.9500          108       139     2012      09        04        248              0.147250      20.403290       0.000000       0.227250       0.234000   -9999.000000       0.127000       0.441000
56192     56192     gansu          104.6700       32.9500          108       139     2012      09        05        249              0.146708      20.514221       0.000000       0.217830       0.240000   -9999.000000   -9999.000000   -9999.000000
56192     56192     gansu          104.6700       32.9500          108       139     2012      09        06        250              0.145667      20.281982       0.000000       0.210517       0.260500       0.163200   -9999.000000       0.553000
56192     56192     gansu          104.6700       32.9500          108       139     2012      09        07        251              0.143792      20.929565       2.314109       0.203525       0.326000   -9999.000000       0.126800   -9999.000000
56192     56192     gansu          104.6700       32.9500          108       139     2012      09        08        252              0.144333      18.976746       0.000000       0.217299   -9999.000000   -9999.000000       0.127300       0.497000
56192     56192     gansu          104.6700       32.9500          108       139     2012      09        09        253              0.142917      20.970398       3.803701       0.209624       0.261000   -9999.000000       0.129900   -9999.000000
56192     56192     gansu          104.6700       32.9500          108       139     2012      09        10        254              0.141708      19.548981       1.907169       0.221777       0.262500   -9999.000000       0.079600   -9999.000000
56192     56192     gansu          104.6700       32.9500          108       139     2012      09        11        255              0.142292      19.050354       6.125669       0.237275       0.267000       0.064600   -9999.000000       0.862000
56192     56192     gansu          104.6700       32.9500          108       139     2012      09        12        256              0.141000      19.887054       1.489703       0.240341       0.317000   -9999.000000       0.075400   -9999.000000
56192     56192     gansu          104.6700       32.9500          108       139     2012      09        13        257              0.141250      15.842041       0.000000       0.251096   -9999.000000   -9999.000000       0.071900       0.424000
56192     56192     gansu          104.6700       32.9500          108       139     2012      09        14        258              0.141792      15.307220       0.000000       0.237652       0.264000   -9999.000000       0.077100   -9999.000000
56192     56192     gansu          104.6700       32.9500          108       139     2012      09        15        259              0.142000      15.758453       1.302063       0.229325       0.293500   -9999.000000       0.079000   -9999.000000
56192     56192     gansu          104.6700       32.9500          108       139     2012      09        16        260              0.142000      14.252014       0.778314       0.229312       0.317500   -9999.000000       0.081500       0.779000
56192     56192     gansu          104.6700       32.9500          108       139     2012      09        17        261              0.142417      13.400299       0.000000       0.237045       0.253000   -9999.000000   -9999.000000   -9999.000000
56192     56192     gansu          104.6700       32.9500          108       139     2012      09        18        262              0.143125      14.799438       0.978948       0.228663       0.331000   -9999.000000       0.058000       0.515000
56192     56192     gansu          104.6700       32.9500          108       139     2012      09        19        263              0.144167      15.476013       0.000000       0.230235       0.245000   -9999.000000       0.058800   -9999.000000
56192     56192     gansu          104.6700       32.9500          108       139     2012      09        20        264              0.144000      16.113708       0.090238       0.221378       0.255000   -9999.000000       0.059200       0.482000
56192     56192     gansu          104.6700       32.9500          108       139     2012      09        21        265              0.145000      14.565033       0.000000       0.219765   -9999.000000   -9999.000000       0.056200       0.526000
56192     56192     gansu          104.6700       32.9500          108       139     2012      09        22        266              0.144833      16.049103       0.143191       0.215258       0.199000       0.044900   -9999.000000   -9999.000000
56192     56192     gansu          104.6700       32.9500          108       139     2012      09        23        267              0.144542      16.084137       0.952604       0.211798       0.240000   -9999.000000   -9999.000000       0.454000
56192     56192     gansu          104.6700       32.9500          108       139     2012      09        24        268              0.144000      15.861572       7.736321       0.210172   -9999.000000   -9999.000000       0.092900   -9999.000000
56192     56192     gansu          104.6700       32.9500          108       139     2012      09        25        269              0.146304      15.159851       4.809386       0.229578       0.190000   -9999.000000       0.091700       0.879000
56192     56192     gansu          104.6700       32.9500          108       139     2012      09        26        270              0.153750      14.899841       0.081768       0.267174       0.196500   -9999.000000       0.088200       0.707000
56192     56192     gansu          104.6700       32.9500          108       139     2012      09        27        271              0.157571      15.828918       0.766360       0.246609       0.212500       0.050500       0.090600       0.561000
56192     56192     gansu          104.6700       32.9500          108       139     2012      09        28        272              0.160000      15.507172       0.244896       0.243793       0.217000   -9999.000000   -9999.000000       0.558000
56192     56192     gansu          104.6700       32.9500          108       139     2012      09        29        273              0.159667      15.203339       5.751292       0.238293   -9999.000000   -9999.000000       0.092400   -9999.000000
56192     56192     gansu          104.6700       32.9500          108       139     2012      09        30        274              0.162125      14.012482       0.000000       0.257762       0.197000   -9999.000000       0.091100       0.695000
56192     56192     gansu          104.6700       32.9500          108       139     2012      10        01        275              0.163875      15.539917       0.556623       0.248546       0.204500   -9999.000000       0.044600   -9999.000000
56192     56192     gansu          104.6700       32.9500          108       139     2012      10        02        276              0.165375      14.457703       3.920753       0.243815       0.207000   -9999.000000       0.047100       0.993000
56192     56192     gansu          104.6700       32.9500          108       139     2012      10        03        277              0.168000      13.568115       1.996967       0.259955       0.210000   -9999.000000   -9999.000000       0.535000
56192     56192     gansu          104.6700       32.9500          108       139     2012      10        04        278              0.171458      15.616730       2.422731       0.250395       0.252000       0.357200   -9999.000000   -9999.000000
56192     56192     gansu          104.6700       32.9500          108       139     2012      10        05        279              0.176333      13.846710       1.568137       0.260377   -9999.000000   -9999.000000       0.050500       0.691000
56192     56192     gansu          104.6700       32.9500          108       139     2012      10        06        280              0.179375      13.533600       0.689303       0.253010       0.204000   -9999.000000       0.046000   -9999.000000
56192     56192     gansu          104.6700       32.9500          108       139     2012      10        07        281              0.181792      12.363831       0.204001       0.254023       0.218500   -9999.000000       0.044100       0.648000
56192     56192     gansu          104.6700       32.9500          108       139     2012      10        08        282              0.181458      12.738770       0.807835       0.248449       0.214000   -9999.000000       0.042800   -9999.000000
56192     56192     gansu          104.6700       32.9500          108       139     2012      10        09        283              0.180208      12.736145       0.802211       0.247878       0.254000   -9999.000000   -9999.000000   -9999.000000
56192     56192     gansu          104.6700       32.9500          108       139     2012      10        10        284              0.177625      12.276520       0.197812       0.243203   -9999.000000   -9999.000000   -9999.000000       0.579000
56192     56192     gansu          104.6700       32.9500          108       139     2012      10        11        285              0.176208      11.957977       1.831354       0.239697       0.136000   -9999.000000       0.041400   -9999.000000
56192     56192     gansu          104.6700       32.9500          108       139     2012      10        12        286              0.175375      11.087952       0.177221       0.242823       0.147000   -9999.000000       0.040000       0.688000
56192     56192     gansu          104.6700       32.9500          108       139     2012      10        13        287              0.175792      11.213196       0.206453       0.246376       0.148500   -9999.000000       0.042400   -9999.000000
56192     56192     gansu          104.6700       32.9500          108       139     2012      10        14        288              0.175917      12.389618       0.484023       0.241256       0.143000   -9999.000000       0.043100   -9999.000000
56192     56192     gansu          104.6700       32.9500          108       139     2012      10        15        289              0.175417      12.123138       0.604259       0.239745       0.168000   -9999.000000   -9999.000000       0.686000
56192     56192     gansu          104.6700       32.9500          108       139     2012      10        16        290              0.174000      12.513123       0.108560       0.240854       0.140000   -9999.000000       0.047700   -9999.000000
56192     56192     gansu          104.6700       32.9500          108       139     2012      10        17        291              0.172875      11.946655       0.759014       0.236828       0.139000   -9999.000000       0.046900       0.447000
56192     56192     gansu          104.6700       32.9500          108       139     2012      10        18        292              0.171250      12.661560       4.888782       0.231277       0.137000   -9999.000000       0.049600   -9999.000000
56192     56192     gansu          104.6700       32.9500          108       139     2012      10        19        293              0.171667      11.514771       0.172896       0.244425       0.139000   -9999.000000       0.046800       0.786000
56192     56192     gansu          104.6700       32.9500          108       139     2012      10        20        294              0.172000      12.851471       0.180865       0.249954       0.165000   -9999.000000   -9999.000000       0.609000
56192     56192     gansu          104.6700       32.9500          108       139     2012      10        21        295              0.172000      12.617859       1.637397       0.241993   -9999.000000   -9999.000000   -9999.000000   -9999.000000
56192     56192     gansu          104.6700       32.9500          108       139     2012      10        22        296              0.172000      10.330048       0.171928       0.244777   -9999.000000   -9999.000000       0.062500       0.528000
56192     56192     gansu          104.6700       32.9500          108       139     2012      10        23        297              0.170333      11.779236       0.294871       0.241015   -9999.000000   -9999.000000       0.062100   -9999.000000
56192     56192     gansu          104.6700       32.9500          108       139     2012      10        24        298              0.170167      10.091705       0.000000       0.237284   -9999.000000   -9999.000000       0.062400       0.597000
56192     56192     gansu          104.6700       32.9500          108       139     2012      10        25        299              0.000000      10.667480       0.619182       0.234371       0.208000   -9999.000000       0.065100       0.560000
56192     56192     gansu          104.6700       32.9500          108       139     2012      10        26        300              0.168333      10.540283       1.123571       0.233703   -9999.000000   -9999.000000   -9999.000000       0.513000
56192     56192     gansu          104.6700       32.9500          108       139     2012      10        27        301              0.167458      11.920929       0.329822       0.234975       0.189000   -9999.000000   -9999.000000       0.400000
56192     56192     gansu          104.6700       32.9500          108       139     2012      10        28        302              0.000000      12.609375       0.578680       0.234164       0.201000   -9999.000000       0.061100   -9999.000000
56192     56192     gansu          104.6700       32.9500          108       139     2012      10        29        303              0.162708      11.819427       0.216930       0.232257       0.182000   -9999.000000       0.053700       0.492000
56192     56192     gansu          104.6700       32.9500          108       139     2012      10        30        304              0.161833      10.256287       0.447820       0.234444       0.194000   -9999.000000       0.052900   -9999.000000
56192     56192     gansu          104.6700       32.9500          108       139     2012      10        31        305              0.161042       9.837280       0.120268       0.232207       0.231000   -9999.000000       0.056500       0.395000
56192     56192     gansu          104.6700       32.9500          108       139     2012      11        01        306              0.159875      10.736511       0.098497       0.228347   -9999.000000   -9999.000000   -9999.000000       0.332000
56192     56192     gansu          104.6700       32.9500          108       139     2012      11        02        307              0.158000      10.797211       0.230350       0.226771       0.214000   -9999.000000       0.057500   -9999.000000
56192     56192     gansu          104.6700       32.9500          108       139     2012      11        03        308              0.157167       9.708008       0.337868       0.226030       0.222000   -9999.000000       0.052000       0.278000
56192     56192     gansu          104.6700       32.9500          108       139     2012      11        04        309              0.155875       7.441101       0.000000       0.222330       0.220000   -9999.000000       0.054000   -9999.000000
56192     56192     gansu          104.6700       32.9500          108       139     2012      11        05        310              0.155083       7.785767       0.000000       0.219571       0.243000   -9999.000000       0.065700       0.328000
56192     56192     gansu          104.6700       32.9500          108       139     2012      11        06        311              0.153333       8.317108       1.443632       0.217533   -9999.000000   -9999.000000   -9999.000000   -9999.000000
56192     56192     gansu          104.6700       32.9500          108       139     2012      11        07        312              0.153000       7.295715       0.216889       0.222741   -9999.000000   -9999.000000   -9999.000000   -9999.000000
56192     56192     gansu          104.6700       32.9500          108       139     2012      11        08        313              0.153000       6.116394       0.000000       0.228557       0.230500   -9999.000000       0.068800       0.418000
56192     56192     gansu          104.6700       32.9500          108       139     2012      11        09        314              0.153000       7.924896       0.319711       0.224698       0.231500   -9999.000000       0.066600   -9999.000000
56192     56192     gansu          104.6700       32.9500          108       139     2012      11        10        315              0.152417       6.854187       0.160049       0.224914       0.215000   -9999.000000       0.060300       0.113000
56192     56192     gansu          104.6700       32.9500          108       139     2012      11        11        316              0.151917       4.927856       0.058953       0.225218       0.195000   -9999.000000       0.066800   -9999.000000
56192     56192     gansu          104.6700       32.9500          108       139     2012      11        12        317              0.151833       6.671600       0.000000       0.222448   -9999.000000   -9999.000000   -9999.000000   -9999.000000
56192     56192     gansu          104.6700       32.9500          108       139     2012      11        13        318              0.000000       8.167206       0.000000       0.219584       0.168000   -9999.000000       0.069000       0.387000
56192     56192     gansu          104.6700       32.9500          108       139     2012      11        14        319              0.150917       8.414612       0.000000       0.217220       0.179000   -9999.000000       0.067400   -9999.000000
56192     56192     gansu          104.6700       32.9500          108       139     2012      11        15        320              0.150250       6.784424       0.557313       0.217670       0.175000   -9999.000000       0.067900       0.317000
56192     56192     gansu          104.6700       32.9500          108       139     2012      11        16        321              0.149636       6.588013       0.000000       0.220418       0.202000   -9999.000000       0.072800   -9999.000000
56192     56192     gansu          104.6700       32.9500          108       139     2012      11        17        322              0.000000       7.187988       0.000000       0.217853   -9999.000000   -9999.000000       0.068500       0.458000
56192     56192     gansu          104.6700       32.9500          108       139     2012      11        18        323              0.148333       7.635529       0.087474       0.215171   -9999.000000   -9999.000000   -9999.000000       0.398000
56192     56192     gansu          104.6700       32.9500          108       139     2012      11        19        324              0.148000       6.914459       0.000000       0.212831       0.180000   -9999.000000       0.064800   -9999.000000
56192     56192     gansu          104.6700       32.9500          108       139     2012      11        20        325              0.148000       5.933044       0.143681       0.210740       0.184000   -9999.000000       0.064800       0.263000
56192     56192     gansu          104.6700       32.9500          108       139     2012      11        21        326              0.147583       6.220764       0.000000       0.212435       0.172000   -9999.000000       0.063000   -9999.000000
56192     56192     gansu          104.6700       32.9500          108       139     2012      11        22        327              0.146500       4.968170       0.000000       0.212488   -9999.000000   -9999.000000       0.067000       0.264000
56192     56192     gansu          104.6700       32.9500          108       139     2012      11        23        328              0.146250       4.343719       0.000000       0.203786   -9999.000000   -9999.000000   -9999.000000       0.209000
56192     56192     gansu          104.6700       32.9500          108       139     2012      11        24        329              0.146000       4.123718       0.427243       0.201051       0.196000   -9999.000000   -9999.000000       0.152000
56192     56192     gansu          104.6700       32.9500          108       139     2012      11        25        330              0.146000       4.653168       0.307843       0.205363   -9999.000000   -9999.000000       0.061800       0.035000
56192     56192     gansu          104.6700       32.9500          108       139     2012      11        26        331              0.145792       2.812531       1.531802       0.191648   -9999.000000   -9999.000000       0.056600   -9999.000000
56192     56192     gansu          104.6700       32.9500          108       139     2012      11        27        332              0.145292       2.597839       0.171981       0.188655   -9999.000000   -9999.000000       0.059500       0.020000
56192     56192     gansu          104.6700       32.9500          108       139     2012      11        28        333              0.145375       1.658875       0.000000       0.180833   -9999.000000   -9999.000000       0.060100   -9999.000000
56192     56192     gansu          104.6700       32.9500          108       139     2012      11        29        334              0.145167       2.899658       0.308810       0.188084   -9999.000000   -9999.000000   -9999.000000       0.020000
56192     56192     gansu          104.6700       32.9500          108       139     2012      11        30        335              0.145000       2.926575       0.177325       0.191167   -9999.000000   -9999.000000       0.057500       0.010000
56192     56192     gansu          104.6700       32.9500          108       139     2012      12        01        336              0.144739       1.365692       0.360766       0.180357       0.216000   -9999.000000       0.055900   -9999.000000
56192     56192     gansu          104.6700       32.9500          108       139     2012      12        02        337              0.144667       3.154694       0.000000       0.192138       0.224000   -9999.000000       0.057500       0.215000
56192     56192     gansu          104.6700       32.9500          108       139     2012      12        03        338              0.144250       3.744751       0.174802       0.200219   -9999.000000   -9999.000000       0.071900   -9999.000000
56192     56192     gansu          104.6700       32.9500          108       139     2012      12        04        339              0.143583       3.686432       0.000000       0.202097   -9999.000000   -9999.000000   -9999.000000       0.143000
56192     56192     gansu          104.6700       32.9500          108       139     2012      12        05        340              0.143167       3.958282       0.000000       0.197564       0.210000   -9999.000000   -9999.000000   -9999.000000
56192     56192     gansu          104.6700       32.9500          108       139     2012      12        06        341              0.143000       3.520264       0.000000       0.193428       0.220000   -9999.000000       0.072200   -9999.000000
56192     56192     gansu          104.6700       32.9500          108       139     2012      12        07        342              0.143000       3.760284       0.000000       0.195817       0.204000   -9999.000000       0.074500       0.114000
56192     56192     gansu          104.6700       32.9500          108       139     2012      12        08        343              0.143000       4.083832       0.000000       0.194986       0.230000   -9999.000000       0.073300   -9999.000000
56192     56192     gansu          104.6700       32.9500          108       139     2012      12        09        344              0.143000       3.331299       0.129762       0.189073   -9999.000000   -9999.000000       0.076400       0.161000
56192     56192     gansu          104.6700       32.9500          108       139     2012      12        10        345              0.143000       3.062042       2.267429       0.190632   -9999.000000   -9999.000000   -9999.000000   -9999.000000
56192     56192     gansu          104.6700       32.9500          108       139     2012      12        11        346              0.143000       3.367584       0.636398       0.189329       0.183000   -9999.000000   -9999.000000   -9999.000000
56192     56192     gansu          104.6700       32.9500          108       139     2012      12        12        347              0.143000       3.239410       0.367671       0.188026       0.174000   -9999.000000       0.069700       0.134000
56192     56192     gansu          104.6700       32.9500          108       139     2012      12        13        348              0.143000       2.615265       0.241127       0.190643       0.187000   -9999.000000       0.069100   -9999.000000
56192     56192     gansu          104.6700       32.9500          108       139     2012      12        14        349              0.142083       2.882538       3.629932       0.199720   -9999.000000   -9999.000000       0.070300       0.230000
56192     56192     gansu          104.6700       32.9500          108       139     2012      12        15        350              0.000000       4.291077       0.050200       0.200758   -9999.000000   -9999.000000       0.071600   -9999.000000
56192     56192     gansu          104.6700       32.9500          108       139     2012      12        16        351              0.141167       3.549103       0.142011       0.199081       0.176000   -9999.000000   -9999.000000       0.251000
56192     56192     gansu          104.6700       32.9500          108       139     2012      12        17        352              0.141000       3.943115       5.094948       0.200811   -9999.000000   -9999.000000       0.070200       0.083000
56192     56192     gansu          104.6700       32.9500          108       139     2012      12        18        353              0.141000       2.002319       0.000000       0.182785       0.184000   -9999.000000       0.068600   -9999.000000
56192     56192     gansu          104.6700       32.9500          108       139     2012      12        19        354              0.141000       2.437683       0.000000       0.179954   -9999.000000   -9999.000000       0.068400       0.059000
56192     56192     gansu          104.6700       32.9500          108       139     2012      12        20        355              0.000000       1.037506       0.223890       0.167819   -9999.000000   -9999.000000       0.070200   -9999.000000
56192     56192     gansu          104.6700       32.9500          108       139     2012      12        21        356              0.141000       1.432800       0.000000       0.171832   -9999.000000   -9999.000000   -9999.000000       0.022000
56192     56192     gansu          104.6700       32.9500          108       139     2012      12        22        357              0.141000       0.213104       0.000000       0.153060   -9999.000000   -9999.000000   -9999.000000       0.071000
56192     56192     gansu          104.6700       32.9500          108       139     2012      12        23        358              0.141000      -0.524597       0.000000       0.140782       0.181000   -9999.000000       0.067300   -9999.000000
56192     56192     gansu          104.6700       32.9500          108       139     2012      12        24        359              0.140842      -0.614929       0.992769       0.136260       0.195000   -9999.000000       0.077400       0.011000
56192     56192     gansu          104.6700       32.9500          108       139     2012      12        25        360              0.141000      -0.007751       0.000000       0.146495   -9999.000000   -9999.000000       0.080500   -9999.000000
56192     56192     gansu          104.6700       32.9500          108       139     2012      12        26        361              0.000000      -0.542633       0.000000       0.137984   -9999.000000   -9999.000000       0.080500       0.003000
56192     56192     gansu          104.6700       32.9500          108       139     2012      12        27        362              0.140583      -0.147736       0.000000       0.142045       0.189000   -9999.000000   -9999.000000   -9999.000000
56192     56192     gansu          104.6700       32.9500          108       139     2012      12        28        363              0.000000      -0.412170       0.015682       0.138681   -9999.000000   -9999.000000       0.075500   -9999.000000
56192     56192     gansu          104.6700       32.9500          108       139     2012      12        29        364              0.000000      -1.966522       0.000000       0.123876   -9999.000000   -9999.000000       0.074500   -9999.000000
56192     56192     gansu          104.6700       32.9500          108       139     2012      12        30        365              0.000000      -3.114685       0.000000       0.113975   -9999.000000   -9999.000000       0.076800   -9999.000000
56192     56192     gansu          104.6700       32.9500          108       139     2012      12        31        366              0.140000      -2.695831       1.464673       0.116147   -9999.000000   -9999.000000       0.071300       0.225000
