# Supplementary material for: Research on Fusing Multisatellite Soil Moisture Data Based on Bayesian Model Averaging
Source: Hindawi journal article supplement (doi:10.1155/2018/9310838), 2018-06-25
Supplement: f1 [file 9310838.f1.zip › 2012_sm00-10cm_daily_ZDB_ZHY_56462_366days_allin.txt]

56462     56462     sichuan        101.5000       29.0000          124       126     2012      01        01        001              0.000000   -9999.000000       0.000000   -9999.000000   -9999.000000   -9999.000000   -9999.000000   -9999.000000
56462     56462     sichuan        101.5000       29.0000          124       126     2012      01        02        002              0.031042      -0.132355       0.189742       0.160288   -9999.000000   -9999.000000       0.057700   -9999.000000
56462     56462     sichuan        101.5000       29.0000          124       126     2012      01        03        003              0.000000      -0.357941       0.000000       0.157848   -9999.000000   -9999.000000       0.055400       0.063000
56462     56462     sichuan        101.5000       29.0000          124       126     2012      01        04        004              0.031250      -1.226593       0.000000       0.145608   -9999.000000   -9999.000000       0.054200   -9999.000000
56462     56462     sichuan        101.5000       29.0000          124       126     2012      01        05        005              0.031417      -3.348663       0.000000       0.115960   -9999.000000   -9999.000000       0.053000       0.136000
56462     56462     sichuan        101.5000       29.0000          124       126     2012      01        06        006              0.032083      -3.280823       0.000000       0.120371   -9999.000000   -9999.000000   -9999.000000   -9999.000000
56462     56462     sichuan        101.5000       29.0000          124       126     2012      01        07        007              0.032208      -2.919281       0.000000       0.123689   -9999.000000   -9999.000000   -9999.000000   -9999.000000
56462     56462     sichuan        101.5000       29.0000          124       126     2012      01        08        008              0.000000      -2.348969       0.000000       0.130477   -9999.000000   -9999.000000       0.058500       0.002000
56462     56462     sichuan        101.5000       29.0000          124       126     2012      01        09        009              0.032417      -1.957703       0.000000       0.135272   -9999.000000   -9999.000000       0.055800   -9999.000000
56462     56462     sichuan        101.5000       29.0000          124       126     2012      01        10        010              0.032500      -1.063049       0.000000       0.143805   -9999.000000   -9999.000000   -9999.000000       0.192000
56462     56462     sichuan        101.5000       29.0000          124       126     2012      01        11        011              0.032708      -1.262482       0.000000       0.147129   -9999.000000   -9999.000000   -9999.000000   -9999.000000
56462     56462     sichuan        101.5000       29.0000          124       126     2012      01        12        012              0.032917      -2.118164       0.000000       0.130823   -9999.000000   -9999.000000   -9999.000000   -9999.000000
56462     56462     sichuan        101.5000       29.0000          124       126     2012      01        13        013              0.033000      -3.308746       0.000000       0.116506   -9999.000000   -9999.000000       0.054300   -9999.000000
56462     56462     sichuan        101.5000       29.0000          124       126     2012      01        14        014              0.033000      -4.112518       0.000000       0.109745   -9999.000000   -9999.000000       0.055000   -9999.000000
56462     56462     sichuan        101.5000       29.0000          124       126     2012      01        15        015              0.033167      -4.686371       0.000000       0.106630   -9999.000000   -9999.000000       0.051900       0.049000
56462     56462     sichuan        101.5000       29.0000          124       126     2012      01        16        016              0.033375      -5.632294       4.860761       0.102086   -9999.000000   -9999.000000       0.043900   -9999.000000
56462     56462     sichuan        101.5000       29.0000          124       126     2012      01        17        017              0.000000      -3.318787       1.310345       0.119737   -9999.000000   -9999.000000   -9999.000000   -9999.000000
56462     56462     sichuan        101.5000       29.0000          124       126     2012      01        18        018              0.033833      -2.965790       4.339615       0.122219   -9999.000000   -9999.000000   -9999.000000       0.028000
56462     56462     sichuan        101.5000       29.0000          124       126     2012      01        19        019              0.034125      -2.220490       0.960692       0.133187   -9999.000000   -9999.000000       0.049500   -9999.000000
56462     56462     sichuan        101.5000       29.0000          124       126     2012      01        20        020              0.034167      -1.854645       1.227430       0.135290   -9999.000000   -9999.000000       0.045400       0.014000
56462     56462     sichuan        101.5000       29.0000          124       126     2012      01        21        021              0.034167      -1.847321       0.000000       0.134548   -9999.000000   -9999.000000       0.045800   -9999.000000
56462     56462     sichuan        101.5000       29.0000          124       126     2012      01        22        022              0.034292      -2.333374       0.000000       0.131347   -9999.000000   -9999.000000       0.043900       0.070000
56462     56462     sichuan        101.5000       29.0000          124       126     2012      01        23        023              0.034375      -2.358276       0.000000       0.132146   -9999.000000   -9999.000000   -9999.000000   -9999.000000
56462     56462     sichuan        101.5000       29.0000          124       126     2012      01        24        024              0.034542      -1.332977      17.275576       0.142770   -9999.000000   -9999.000000   -9999.000000       0.192000
56462     56462     sichuan        101.5000       29.0000          124       126     2012      01        25        025              0.034583      -0.887024       0.750555       0.148899       0.266000   -9999.000000       0.059800       0.051000
56462     56462     sichuan        101.5000       29.0000          124       126     2012      01        26        026              0.034667      -0.675995       4.387734       0.151895       0.260000   -9999.000000       0.054700   -9999.000000
56462     56462     sichuan        101.5000       29.0000          124       126     2012      01        27        027              0.035083      -0.224548       0.000000       0.157700   -9999.000000   -9999.000000       0.055600       0.100000
56462     56462     sichuan        101.5000       29.0000          124       126     2012      01        28        028              0.035167      -0.391937       0.000000       0.156700   -9999.000000   -9999.000000   -9999.000000   -9999.000000
56462     56462     sichuan        101.5000       29.0000          124       126     2012      01        29        029              0.034958      -0.427948       2.732740       0.155511   -9999.000000   -9999.000000   -9999.000000       0.196000
56462     56462     sichuan        101.5000       29.0000          124       126     2012      01        30        030              0.034958       0.084534       0.000000       0.161835       0.285000   -9999.000000       0.047400       0.064000
56462     56462     sichuan        101.5000       29.0000          124       126     2012      01        31        031              0.035000      -0.036560       0.000000       0.160707       0.253000   -9999.000000       0.051500   -9999.000000
56462     56462     sichuan        101.5000       29.0000          124       126     2012      02        01        032              0.035000      -0.319244       0.000000       0.155649       0.189000   -9999.000000       0.046000       0.113000
56462     56462     sichuan        101.5000       29.0000          124       126     2012      02        02        033              0.035167      -0.673981       0.000000       0.150754   -9999.000000   -9999.000000       0.046700   -9999.000000
56462     56462     sichuan        101.5000       29.0000          124       126     2012      02        03        034              0.035292      -0.341888       0.000000       0.154680   -9999.000000   -9999.000000   -9999.000000       0.481000
56462     56462     sichuan        101.5000       29.0000          124       126     2012      02        04        035              0.035417      -0.621002       0.000000       0.152987       0.171000   -9999.000000   -9999.000000   -9999.000000
56462     56462     sichuan        101.5000       29.0000          124       126     2012      02        05        036              0.035333       0.291870       0.000000       0.162295       0.154000   -9999.000000       0.051200   -9999.000000
56462     56462     sichuan        101.5000       29.0000          124       126     2012      02        06        037              0.035375       0.309479       0.000000       0.164229   -9999.000000   -9999.000000       0.041800       0.040000
56462     56462     sichuan        101.5000       29.0000          124       126     2012      02        07        038              0.035375       1.192383       1.682312       0.174676   -9999.000000   -9999.000000       0.043200   -9999.000000
56462     56462     sichuan        101.5000       29.0000          124       126     2012      02        08        039              0.035500       1.981049       1.510888       0.185194   -9999.000000   -9999.000000   -9999.000000       0.313000
56462     56462     sichuan        101.5000       29.0000          124       126     2012      02        09        040              0.035417       2.785858       0.000000       0.199390   -9999.000000   -9999.000000   -9999.000000   -9999.000000
56462     56462     sichuan        101.5000       29.0000          124       126     2012      02        10        041              0.035333       1.752045       0.000000       0.183331   -9999.000000   -9999.000000   -9999.000000       0.151000
56462     56462     sichuan        101.5000       29.0000          124       126     2012      02        11        042              0.035261      -0.573853       0.000000       0.153103   -9999.000000   -9999.000000       0.046400       0.203000
56462     56462     sichuan        101.5000       29.0000          124       126     2012      02        12        043              0.035000      -0.740540       0.000000       0.149768   -9999.000000   -9999.000000       0.044900   -9999.000000
56462     56462     sichuan        101.5000       29.0000          124       126     2012      02        13        044              0.035125      -1.726837       0.000000       0.137352   -9999.000000   -9999.000000       0.053700       0.197000
56462     56462     sichuan        101.5000       29.0000          124       126     2012      02        14        045              0.035250      -0.531555       0.000000       0.151318   -9999.000000   -9999.000000   -9999.000000   -9999.000000
56462     56462     sichuan        101.5000       29.0000          124       126     2012      02        15        046              0.035522      -0.176147      33.652679       0.156474       0.206000   -9999.000000   -9999.000000       0.233000
56462     56462     sichuan        101.5000       29.0000          124       126     2012      02        16        047              0.035583       1.744019       0.819483       0.177731       0.188000   -9999.000000       0.054800       0.248000
56462     56462     sichuan        101.5000       29.0000          124       126     2012      02        17        048              0.035500       2.422211       0.000000       0.189041       0.197000   -9999.000000       0.058200   -9999.000000
56462     56462     sichuan        101.5000       29.0000          124       126     2012      02        18        049              0.035208       2.316528       0.000000       0.189258   -9999.000000   -9999.000000       0.052700       0.012000
56462     56462     sichuan        101.5000       29.0000          124       126     2012      02        19        050              0.035042       0.174316       0.000000       0.163135   -9999.000000   -9999.000000       0.053300   -9999.000000
56462     56462     sichuan        101.5000       29.0000          124       126     2012      02        20        051              0.035208      -0.020477       0.000000       0.158616   -9999.000000   -9999.000000   -9999.000000       0.109000
56462     56462     sichuan        101.5000       29.0000          124       126     2012      02        21        052              0.035304       0.482605       0.000000       0.164759       0.122000   -9999.000000   -9999.000000   -9999.000000
56462     56462     sichuan        101.5000       29.0000          124       126     2012      02        22        053              0.035348       1.052490       0.145738       0.171398       0.134000   -9999.000000       0.043500       0.174000
56462     56462     sichuan        101.5000       29.0000          124       126     2012      02        23        054              0.035304       1.932770       0.947765       0.181903   -9999.000000   -9999.000000       0.040700       0.145000
56462     56462     sichuan        101.5000       29.0000          124       126     2012      02        24        055              0.035500       3.206390       0.000000       0.194640   -9999.000000   -9999.000000       0.042300   -9999.000000
56462     56462     sichuan        101.5000       29.0000          124       126     2012      02        25        056              0.035333       4.294403       2.031405       0.204613       0.123000   -9999.000000   -9999.000000       0.227000
56462     56462     sichuan        101.5000       29.0000          124       126     2012      02        26        057              0.035250       4.075226       0.000000       0.205017   -9999.000000   -9999.000000   -9999.000000   -9999.000000
56462     56462     sichuan        101.5000       29.0000          124       126     2012      02        27        058              0.034957       2.222748       0.000000       0.192076   -9999.000000   -9999.000000   -9999.000000       0.318000
56462     56462     sichuan        101.5000       29.0000          124       126     2012      02        28        059              0.035130       0.692688      12.851368       0.166113   -9999.000000   -9999.000000   -9999.000000       0.106000
56462     56462     sichuan        101.5000       29.0000          124       126     2012      02        29        060              0.000000   -9999.000000       0.000000   -9999.000000   -9999.000000   -9999.000000   -9999.000000   -9999.000000
56462     56462     sichuan        101.5000       29.0000          124       126     2012      03        01        061              0.034565       2.024811       0.000000       0.180823   -9999.000000   -9999.000000       0.036800       0.151000
56462     56462     sichuan        101.5000       29.0000          124       126     2012      03        02        062              0.034750       0.485565       0.000000       0.165778   -9999.000000   -9999.000000   -9999.000000   -9999.000000
56462     56462     sichuan        101.5000       29.0000          124       126     2012      03        03        063              0.034792       0.659180       0.000000       0.163262   -9999.000000   -9999.000000   -9999.000000       0.370000
56462     56462     sichuan        101.5000       29.0000          124       126     2012      03        04        064              0.034833       0.235199       0.000000       0.157358   -9999.000000   -9999.000000       0.038900   -9999.000000
56462     56462     sichuan        101.5000       29.0000          124       126     2012      03        05        065              0.035000       1.164612       0.171562       0.170821   -9999.000000   -9999.000000       0.049100   -9999.000000
56462     56462     sichuan        101.5000       29.0000          124       126     2012      03        06        066              0.035250       2.935974       0.757384       0.187623   -9999.000000   -9999.000000       0.048200       0.170000
56462     56462     sichuan        101.5000       29.0000          124       126     2012      03        07        067              0.000000       5.097626       1.499437       0.202102       0.155000   -9999.000000       0.046700   -9999.000000
56462     56462     sichuan        101.5000       29.0000          124       126     2012      03        08        068              0.034917       4.388702       1.648643       0.199556   -9999.000000   -9999.000000   -9999.000000       0.357000
56462     56462     sichuan        101.5000       29.0000          124       126     2012      03        09        069              0.034917       4.589417       1.533279       0.198120       0.143000   -9999.000000   -9999.000000   -9999.000000
56462     56462     sichuan        101.5000       29.0000          124       126     2012      03        10        070              0.034833       5.730530       4.091116       0.202836   -9999.000000   -9999.000000       0.047600       0.011000
56462     56462     sichuan        101.5000       29.0000          124       126     2012      03        11        071              0.033875       6.268829       2.313774       0.202909   -9999.000000   -9999.000000       0.047900       0.181000
56462     56462     sichuan        101.5000       29.0000          124       126     2012      03        12        072              0.033833       6.065125       1.541628       0.203832       0.110000   -9999.000000       0.056300   -9999.000000
56462     56462     sichuan        101.5000       29.0000          124       126     2012      03        13        073              0.033792       6.887543       0.000000       0.205231       0.103000   -9999.000000   -9999.000000       0.320000
56462     56462     sichuan        101.5000       29.0000          124       126     2012      03        14        074              0.033417       7.639465       1.778625       0.204186       0.112000   -9999.000000   -9999.000000   -9999.000000
56462     56462     sichuan        101.5000       29.0000          124       126     2012      03        15        075              0.033375       4.259918       0.000000       0.196135   -9999.000000   -9999.000000   -9999.000000       0.223000
56462     56462     sichuan        101.5000       29.0000          124       126     2012      03        16        076              0.033000       4.585388       0.000000       0.193359   -9999.000000   -9999.000000       0.056900       0.357000
56462     56462     sichuan        101.5000       29.0000          124       126     2012      03        17        077              0.000000       2.783630       0.000000       0.186113       0.116000   -9999.000000       0.055300   -9999.000000
56462     56462     sichuan        101.5000       29.0000          124       126     2012      03        18        078              0.000000       4.053772       0.000000       0.184584       0.102000   -9999.000000       0.055600       0.205000
56462     56462     sichuan        101.5000       29.0000          124       126     2012      03        19        079              0.000000       5.241577       0.369680       0.187640       0.111000   -9999.000000   -9999.000000   -9999.000000
56462     56462     sichuan        101.5000       29.0000          124       126     2012      03        20        080              0.000000       5.847565       0.593615       0.194725       0.135000   -9999.000000   -9999.000000       0.422000
56462     56462     sichuan        101.5000       29.0000          124       126     2012      03        21        081              0.000000       7.861969       0.000000       0.199789   -9999.000000   -9999.000000       0.052000   -9999.000000
56462     56462     sichuan        101.5000       29.0000          124       126     2012      03        22        082              0.000000      10.044128       0.487992       0.198903   -9999.000000   -9999.000000       0.054400       0.575000
56462     56462     sichuan        101.5000       29.0000          124       126     2012      03        23        083              0.000000       8.148071       1.520287       0.200086   -9999.000000   -9999.000000       0.055100       0.335000
56462     56462     sichuan        101.5000       29.0000          124       126     2012      03        24        084              0.000000       2.195465       1.356463       0.192756       0.126000   -9999.000000       0.053000   -9999.000000
56462     56462     sichuan        101.5000       29.0000          124       126     2012      03        25        085              0.000000       3.905396       0.903975       0.199292       0.123000   -9999.000000   -9999.000000       0.248000
56462     56462     sichuan        101.5000       29.0000          124       126     2012      03        26        086              0.000000       4.684143       0.410184       0.206412   -9999.000000   -9999.000000   -9999.000000   -9999.000000
56462     56462     sichuan        101.5000       29.0000          124       126     2012      03        27        087              0.000000       6.191833       0.777558       0.208785   -9999.000000   -9999.000000       0.045300       0.417000
56462     56462     sichuan        101.5000       29.0000          124       126     2012      03        28        088              0.000000       7.274536       0.249311       0.210865       0.125000   -9999.000000       0.043400       0.048000
56462     56462     sichuan        101.5000       29.0000          124       126     2012      03        29        089              0.035167       8.589783       2.420392       0.211261       0.106000   -9999.000000       0.048700   -9999.000000
56462     56462     sichuan        101.5000       29.0000          124       126     2012      03        30        090              0.035250       6.661316       6.406566       0.207034   -9999.000000   -9999.000000   -9999.000000       0.123000
56462     56462     sichuan        101.5000       29.0000          124       126     2012      03        31        091              0.035875       3.904480       2.751753       0.204116   -9999.000000   -9999.000000   -9999.000000   -9999.000000
56462     56462     sichuan        101.5000       29.0000          124       126     2012      04        01        092              0.037083       3.187042       1.360772       0.222483   -9999.000000   -9999.000000       0.040500       0.278000
56462     56462     sichuan        101.5000       29.0000          124       126     2012      04        02        093              0.038750       5.009674       1.209771       0.224916       0.089000   -9999.000000       0.048600   -9999.000000
56462     56462     sichuan        101.5000       29.0000          124       126     2012      04        03        094              0.039833       8.056213       1.178612       0.230198       0.075000   -9999.000000       0.044400   -9999.000000
56462     56462     sichuan        101.5000       29.0000          124       126     2012      04        04        095              0.040583       9.117218       0.362980       0.227151       0.103000   -9999.000000       0.055300       0.438000
56462     56462     sichuan        101.5000       29.0000          124       126     2012      04        05        096              0.040500       9.764191       1.165796       0.223545   -9999.000000   -9999.000000   -9999.000000   -9999.000000
56462     56462     sichuan        101.5000       29.0000          124       126     2012      04        06        097              0.040500       7.453583       2.627376       0.220725   -9999.000000   -9999.000000   -9999.000000       0.498000
56462     56462     sichuan        101.5000       29.0000          124       126     2012      04        07        098              0.040083       7.135162       3.328030       0.219280   -9999.000000   -9999.000000       0.049100   -9999.000000
56462     56462     sichuan        101.5000       29.0000          124       126     2012      04        08        099              0.040417       5.004272       0.883760       0.215321   -9999.000000   -9999.000000       0.046100       0.059000
56462     56462     sichuan        101.5000       29.0000          124       126     2012      04        09        100              0.042167       4.538513       0.467866       0.212423       0.110000   -9999.000000       0.046100       0.517000
56462     56462     sichuan        101.5000       29.0000          124       126     2012      04        10        101              0.042417       6.387726       0.516891       0.217134       0.105000   -9999.000000       0.042700   -9999.000000
56462     56462     sichuan        101.5000       29.0000          124       126     2012      04        11        102              0.042750       6.992004       0.646891       0.217488   -9999.000000   -9999.000000   -9999.000000       0.388000
56462     56462     sichuan        101.5000       29.0000          124       126     2012      04        12        103              0.043042       8.229950       2.988301       0.218803   -9999.000000   -9999.000000   -9999.000000   -9999.000000
56462     56462     sichuan        101.5000       29.0000          124       126     2012      04        13        104              0.043083       8.164337       0.748923       0.231997       0.089000   -9999.000000       0.039500       0.248000
56462     56462     sichuan        101.5000       29.0000          124       126     2012      04        14        105              0.043542       7.462006       0.505440       0.227638   -9999.000000   -9999.000000       0.036900       0.478000
56462     56462     sichuan        101.5000       29.0000          124       126     2012      04        15        106              0.043500       8.971375       1.546491       0.222784   -9999.000000   -9999.000000       0.043400   -9999.000000
56462     56462     sichuan        101.5000       29.0000          124       126     2012      04        16        107              0.043000       8.773499       2.252998       0.226628   -9999.000000   -9999.000000   -9999.000000       0.224000
56462     56462     sichuan        101.5000       29.0000          124       126     2012      04        17        108              0.042739       6.948425       0.986037       0.229704   -9999.000000   -9999.000000   -9999.000000   -9999.000000
56462     56462     sichuan        101.5000       29.0000          124       126     2012      04        18        109              0.042167       7.554474       0.853406       0.228187   -9999.000000   -9999.000000   -9999.000000       0.338000
56462     56462     sichuan        101.5000       29.0000          124       126     2012      04        19        110              0.043375       7.528778       3.678432       0.229628   -9999.000000   -9999.000000       0.035100   -9999.000000
56462     56462     sichuan        101.5000       29.0000          124       126     2012      04        20        111              0.047625       5.281738       2.554798       0.230604   -9999.000000   -9999.000000       0.026800       0.319000
56462     56462     sichuan        101.5000       29.0000          124       126     2012      04        21        112              0.048875       4.579224       0.954123       0.232693   -9999.000000   -9999.000000       0.037200       0.272000
56462     56462     sichuan        101.5000       29.0000          124       126     2012      04        22        113              0.048500       6.671661       0.292919       0.234507   -9999.000000   -9999.000000   -9999.000000   -9999.000000
56462     56462     sichuan        101.5000       29.0000          124       126     2012      04        23        114              0.048792       8.478455       3.082734       0.236258   -9999.000000   -9999.000000   -9999.000000       0.461000
56462     56462     sichuan        101.5000       29.0000          124       126     2012      04        24        115              0.048542       9.850739       1.377441       0.240838       0.075000   -9999.000000       0.040300   -9999.000000
56462     56462     sichuan        101.5000       29.0000          124       126     2012      04        25        116              0.000000      10.847229       4.065202       0.235945   -9999.000000   -9999.000000       0.036900       0.549000
56462     56462     sichuan        101.5000       29.0000          124       126     2012      04        26        117              0.123083       3.957703       0.739689       0.235165   -9999.000000   -9999.000000       0.040800       0.196000
56462     56462     sichuan        101.5000       29.0000          124       126     2012      04        27        118              0.106958       5.744598       1.067790       0.245087   -9999.000000   -9999.000000       0.042500   -9999.000000
56462     56462     sichuan        101.5000       29.0000          124       126     2012      04        28        119              0.099208       7.558594       0.793257       0.246994   -9999.000000   -9999.000000   -9999.000000       0.223000
56462     56462     sichuan        101.5000       29.0000          124       126     2012      04        29        120              0.092833       6.809631       0.816211       0.245205   -9999.000000   -9999.000000   -9999.000000   -9999.000000
56462     56462     sichuan        101.5000       29.0000          124       126     2012      04        30        121              0.086625       7.349274       2.312925       0.241948       0.086000   -9999.000000       0.054700       0.439000
56462     56462     sichuan        101.5000       29.0000          124       126     2012      05        01        122              0.081708       9.665771       3.746444       0.245451       0.135000   -9999.000000       0.055300   -9999.000000
56462     56462     sichuan        101.5000       29.0000          124       126     2012      05        02        123              0.076875       9.398346       2.612500       0.252367   -9999.000000   -9999.000000       0.067500   -9999.000000
56462     56462     sichuan        101.5000       29.0000          124       126     2012      05        03        124              0.072458      10.129517       1.866909       0.240536   -9999.000000   -9999.000000   -9999.000000       0.416000
56462     56462     sichuan        101.5000       29.0000          124       126     2012      05        04        125              0.068125      11.346802       2.789493       0.231952       0.131000   -9999.000000   -9999.000000   -9999.000000
56462     56462     sichuan        101.5000       29.0000          124       126     2012      05        05        126              0.063583      12.272552       3.642999       0.230457       0.118000   -9999.000000       0.062200       0.639000
56462     56462     sichuan        101.5000       29.0000          124       126     2012      05        06        127              0.059625      11.300537       1.681947       0.235771       0.124000   -9999.000000       0.064500   -9999.000000
56462     56462     sichuan        101.5000       29.0000          124       126     2012      05        07        128              0.056087      11.357300       0.770484       0.229598   -9999.000000   -9999.000000       0.062700       0.477000
56462     56462     sichuan        101.5000       29.0000          124       126     2012      05        08        129              0.052000      14.528625       0.390775       0.218569   -9999.000000   -9999.000000       0.072000       0.572000
56462     56462     sichuan        101.5000       29.0000          124       126     2012      05        09        130              0.048667      13.307251       0.622315       0.210538       0.112000   -9999.000000   -9999.000000   -9999.000000
56462     56462     sichuan        101.5000       29.0000          124       126     2012      05        10        131              0.045708      13.935974      19.151098       0.205918       0.095000   -9999.000000   -9999.000000       0.492000
56462     56462     sichuan        101.5000       29.0000          124       126     2012      05        11        132              0.042583      14.785767       3.029097       0.200506       0.123000   -9999.000000       0.071000   -9999.000000
56462     56462     sichuan        101.5000       29.0000          124       126     2012      05        12        133              0.040042      15.336090       0.515975       0.210032   -9999.000000   -9999.000000       0.073700       0.435000
56462     56462     sichuan        101.5000       29.0000          124       126     2012      05        13        134              0.038083      12.732147       1.262840       0.210591   -9999.000000   -9999.000000       0.070300       0.525000
56462     56462     sichuan        101.5000       29.0000          124       126     2012      05        14        135              0.036333      13.258789       0.940322       0.211040       0.123000   -9999.000000   -9999.000000   -9999.000000
56462     56462     sichuan        101.5000       29.0000          124       126     2012      05        15        136              0.035542       9.703644       2.386160       0.216367       0.114000   -9999.000000   -9999.000000       0.485000
56462     56462     sichuan        101.5000       29.0000          124       126     2012      05        16        137              0.034708       6.817169       0.000000       0.230828       0.139000   -9999.000000   -9999.000000   -9999.000000
56462     56462     sichuan        101.5000       29.0000          124       126     2012      05        17        138              0.033500      10.510284       6.672508       0.221604       0.143000   -9999.000000       0.068400       0.437000
56462     56462     sichuan        101.5000       29.0000          124       126     2012      05        18        139              0.031833      12.205994       0.218433       0.211737   -9999.000000   -9999.000000       0.069400   -9999.000000
56462     56462     sichuan        101.5000       29.0000          124       126     2012      05        19        140              0.030333      13.405365       2.253187       0.204389       0.142000   -9999.000000       0.069800       0.583000
56462     56462     sichuan        101.5000       29.0000          124       126     2012      05        20        141              0.028917      14.160217       3.284466       0.198112       0.138000   -9999.000000   -9999.000000       0.559000
56462     56462     sichuan        101.5000       29.0000          124       126     2012      05        21        142              0.027083      15.610504       3.847588       0.194114       0.150000   -9999.000000   -9999.000000   -9999.000000
56462     56462     sichuan        101.5000       29.0000          124       126     2012      05        22        143              0.025417      17.187653       4.230773       0.187899       0.152000   -9999.000000       0.069200       0.692000
56462     56462     sichuan        101.5000       29.0000          124       126     2012      05        23        144              0.024000      16.396790       0.000000       0.179537   -9999.000000   -9999.000000       0.066700   -9999.000000
56462     56462     sichuan        101.5000       29.0000          124       126     2012      05        24        145              0.022542      17.113831       0.000000       0.173446       0.176000   -9999.000000       0.070100       0.744000
56462     56462     sichuan        101.5000       29.0000          124       126     2012      05        25        146              0.000000      16.652496       3.778708       0.168424       0.154000   -9999.000000       0.066900       0.385000
56462     56462     sichuan        101.5000       29.0000          124       126     2012      05        26        147              0.021000      14.243439       7.139040       0.194635   -9999.000000   -9999.000000   -9999.000000   -9999.000000
56462     56462     sichuan        101.5000       29.0000          124       126     2012      05        27        148              0.021042      13.125366       0.121568       0.236264       0.148000   -9999.000000   -9999.000000       0.571000
56462     56462     sichuan        101.5000       29.0000          124       126     2012      05        28        149              0.020583      15.348663       5.752936       0.229117   -9999.000000   -9999.000000   -9999.000000   -9999.000000
56462     56462     sichuan        101.5000       29.0000          124       126     2012      05        29        150              0.020417      14.879150      15.057686       0.229172   -9999.000000   -9999.000000       0.077500       0.791000
56462     56462     sichuan        101.5000       29.0000          124       126     2012      05        30        151              0.021750      13.445984       0.890040       0.280469       0.139000   -9999.000000       0.073900   -9999.000000
56462     56462     sichuan        101.5000       29.0000          124       126     2012      05        31        152              0.022958      10.962433      16.034971       0.271649       0.116000   -9999.000000   -9999.000000   -9999.000000
56462     56462     sichuan        101.5000       29.0000          124       126     2012      06        01        153              0.027250      12.492279       6.581128       0.282926       0.199000   -9999.000000   -9999.000000       0.587000
56462     56462     sichuan        101.5000       29.0000          124       126     2012      06        02        154              0.063750      11.699951      15.011649       0.292272   -9999.000000   -9999.000000   -9999.000000   -9999.000000
56462     56462     sichuan        101.5000       29.0000          124       126     2012      06        03        155              0.091208       9.605469       2.672283       0.315018   -9999.000000   -9999.000000   -9999.000000       0.866000
56462     56462     sichuan        101.5000       29.0000          124       126     2012      06        04        156              0.087417      11.451385       0.962603       0.294843       0.160000   -9999.000000       0.068000   -9999.000000
56462     56462     sichuan        101.5000       29.0000          124       126     2012      06        05        157              0.079917      10.974823       0.705937       0.286155       0.171000   -9999.000000       0.063100       0.665000
56462     56462     sichuan        101.5000       29.0000          124       126     2012      06        06        158              0.072792      14.646606       1.171176       0.272553       0.181500   -9999.000000   -9999.000000       0.782000
56462     56462     sichuan        101.5000       29.0000          124       126     2012      06        07        159              0.069250      14.740265       4.090312       0.266448       0.179000   -9999.000000   -9999.000000   -9999.000000
56462     56462     sichuan        101.5000       29.0000          124       126     2012      06        08        160              0.072417      13.730865       0.000000       0.274667   -9999.000000   -9999.000000       0.064100       0.691000
56462     56462     sichuan        101.5000       29.0000          124       126     2012      06        09        161              0.068417      14.233490       5.416067       0.268870       0.212000   -9999.000000       0.065300   -9999.000000
56462     56462     sichuan        101.5000       29.0000          124       126     2012      06        10        162              0.064417      14.442780       0.000000       0.260328       0.187000   -9999.000000       0.063400       0.616000
56462     56462     sichuan        101.5000       29.0000          124       126     2012      06        11        163              0.000000      15.114532      25.287146       0.253205       0.126000   -9999.000000       0.046200       0.650000
56462     56462     sichuan        101.5000       29.0000          124       126     2012      06        12        164              0.155833      13.624908      43.030594       0.291464       0.157000   -9999.000000   -9999.000000   -9999.000000
56462     56462     sichuan        101.5000       29.0000          124       126     2012      06        13        165              0.149500      11.460449      11.771450       0.334282   -9999.000000   -9999.000000   -9999.000000       0.914000
56462     56462     sichuan        101.5000       29.0000          124       126     2012      06        14        166              0.136917      12.362335       6.549592       0.321063   -9999.000000   -9999.000000       0.053100   -9999.000000
56462     56462     sichuan        101.5000       29.0000          124       126     2012      06        15        167              0.137583      11.108887      12.217199       0.310101   -9999.000000   -9999.000000       0.052300       0.888000
56462     56462     sichuan        101.5000       29.0000          124       126     2012      06        16        168              0.153375       9.506042      24.089537       0.308495       0.161000   -9999.000000       0.052200   -9999.000000
56462     56462     sichuan        101.5000       29.0000          124       126     2012      06        17        169              0.152125       9.826233      15.326313       0.325425       0.160000   -9999.000000   -9999.000000       1.000000
56462     56462     sichuan        101.5000       29.0000          124       126     2012      06        18        170              0.153875      10.811493       6.807171       0.323795   -9999.000000   -9999.000000   -9999.000000       0.884000
56462     56462     sichuan        101.5000       29.0000          124       126     2012      06        19        171              0.156792      11.992676      10.411595       0.315460   -9999.000000   -9999.000000   -9999.000000   -9999.000000
56462     56462     sichuan        101.5000       29.0000          124       126     2012      06        20        172              0.168667      11.546844      39.824081       0.313609   -9999.000000   -9999.000000       0.067100       1.000000
56462     56462     sichuan        101.5000       29.0000          124       126     2012      06        21        173              0.165792       9.845581      11.291286       0.334150       0.186000   -9999.000000       0.062800   -9999.000000
56462     56462     sichuan        101.5000       29.0000          124       126     2012      06        22        174              0.140208       9.213409       1.499796       0.325936       0.194500   -9999.000000       0.058600       0.752000
56462     56462     sichuan        101.5000       29.0000          124       126     2012      06        23        175              0.151083      12.352417      11.528036       0.304271   -9999.000000   -9999.000000   -9999.000000       0.854000
56462     56462     sichuan        101.5000       29.0000          124       126     2012      06        24        176              0.160708      10.661469      11.467525       0.313477   -9999.000000   -9999.000000   -9999.000000   -9999.000000
56462     56462     sichuan        101.5000       29.0000          124       126     2012      06        25        177              0.167583      10.278534      22.236698       0.316205   -9999.000000   -9999.000000       0.048400       1.000000
56462     56462     sichuan        101.5000       29.0000          124       126     2012      06        26        178              0.167708      12.496918      23.303011       0.329431   -9999.000000   -9999.000000       0.050700   -9999.000000
56462     56462     sichuan        101.5000       29.0000          124       126     2012      06        27        179              0.147375      12.610291       2.488014       0.326196       0.194000   -9999.000000       0.048300       1.000000
56462     56462     sichuan        101.5000       29.0000          124       126     2012      06        28        180              0.136000      13.503235       1.569928       0.310647       0.189000   -9999.000000       0.046900   -9999.000000
56462     56462     sichuan        101.5000       29.0000          124       126     2012      06        29        181              0.149375      12.970795      15.768345       0.301640   -9999.000000   -9999.000000   -9999.000000   -9999.000000
56462     56462     sichuan        101.5000       29.0000          124       126     2012      06        30        182              0.162125      12.531738       5.544158       0.315923       0.190000   -9999.000000   -9999.000000   -9999.000000
56462     56462     sichuan        101.5000       29.0000          124       126     2012      07        01        183              0.158083      11.884491       1.467457       0.309085       0.144000       0.285700       0.047200   -9999.000000
56462     56462     sichuan        101.5000       29.0000          124       126     2012      07        02        184              0.155125      12.399231      13.555361       0.304120       0.148500   -9999.000000       0.063900       1.000000
56462     56462     sichuan        101.5000       29.0000          124       126     2012      07        03        185              0.171792      12.737823      26.568333       0.311557   -9999.000000   -9999.000000       0.060700   -9999.000000
56462     56462     sichuan        101.5000       29.0000          124       126     2012      07        04        186              0.165292      12.266388      11.591739       0.328848   -9999.000000       0.081600   -9999.000000       1.000000
56462     56462     sichuan        101.5000       29.0000          124       126     2012      07        05        187              0.157833      13.062805       5.500070       0.320387   -9999.000000   -9999.000000   -9999.000000       0.846000
56462     56462     sichuan        101.5000       29.0000          124       126     2012      07        06        188              0.145167      12.777130       1.264900       0.315112   -9999.000000   -9999.000000       0.060800   -9999.000000
56462     56462     sichuan        101.5000       29.0000          124       126     2012      07        07        189              0.136417      13.641479      12.688543       0.306202   -9999.000000   -9999.000000       0.062200       0.942000
56462     56462     sichuan        101.5000       29.0000          124       126     2012      07        08        190              0.151750      14.340942      14.453667       0.313699       0.122000   -9999.000000       0.061300   -9999.000000
56462     56462     sichuan        101.5000       29.0000          124       126     2012      07        09        191              0.166917      15.175079       5.709813       0.317185   -9999.000000       0.068500       0.034100       0.865000
56462     56462     sichuan        101.5000       29.0000          124       126     2012      07        10        192              0.166458      13.798676       4.004398       0.316109   -9999.000000   -9999.000000   -9999.000000       0.814000
56462     56462     sichuan        101.5000       29.0000          124       126     2012      07        11        193              0.173708      12.685486      40.882568       0.310022   -9999.000000   -9999.000000   -9999.000000   -9999.000000
56462     56462     sichuan        101.5000       29.0000          124       126     2012      07        12        194              0.168792      12.682922       6.782485       0.329650       0.143000   -9999.000000       0.041200       1.000000
56462     56462     sichuan        101.5000       29.0000          124       126     2012      07        13        195              0.148792      12.526245       0.262072       0.327609       0.177500   -9999.000000       0.043500   -9999.000000
56462     56462     sichuan        101.5000       29.0000          124       126     2012      07        14        196              0.162000      14.202942      61.098892       0.313183       0.188000   -9999.000000       0.037800       1.000000
56462     56462     sichuan        101.5000       29.0000          124       126     2012      07        15        197              0.178167      12.130005      22.629368       0.354488   -9999.000000   -9999.000000       0.042300   -9999.000000
56462     56462     sichuan        101.5000       29.0000          124       126     2012      07        16        198              0.169958      12.511505      11.562943       0.376244   -9999.000000   -9999.000000   -9999.000000       1.000000
56462     56462     sichuan        101.5000       29.0000          124       126     2012      07        17        199              0.175417      12.981323      16.310604       0.342542       0.185000   -9999.000000   -9999.000000       1.000000
56462     56462     sichuan        101.5000       29.0000          124       126     2012      07        18        200              0.159667      12.313812       1.332170       0.338368       0.183000   -9999.000000       0.043600   -9999.000000
56462     56462     sichuan        101.5000       29.0000          124       126     2012      07        19        201              0.159792      12.401184       6.003248       0.323521       0.171000   -9999.000000       0.044200       0.951000
56462     56462     sichuan        101.5000       29.0000          124       126     2012      07        20        202              0.159042      12.527710       0.801615       0.319144   -9999.000000   -9999.000000       0.039900   -9999.000000
56462     56462     sichuan        101.5000       29.0000          124       126     2012      07        21        203              0.155000      12.922333       3.748606       0.308916   -9999.000000   -9999.000000   -9999.000000       1.000000
56462     56462     sichuan        101.5000       29.0000          124       126     2012      07        22        204              0.150458      12.566559       2.175287       0.309375       0.229500   -9999.000000   -9999.000000       0.782000
56462     56462     sichuan        101.5000       29.0000          124       126     2012      07        23        205              0.144917      12.483154       3.475727       0.303265       0.206500   -9999.000000       0.044800   -9999.000000
56462     56462     sichuan        101.5000       29.0000          124       126     2012      07        24        206              0.142417      11.798218       6.774158       0.304486       0.221500   -9999.000000       0.041500       0.897000
56462     56462     sichuan        101.5000       29.0000          124       126     2012      07        25        207              0.126000      12.589264       3.271828       0.307407       0.229000   -9999.000000       0.042600   -9999.000000
56462     56462     sichuan        101.5000       29.0000          124       126     2012      07        26        208              0.128437      14.332703       0.273264       0.304398   -9999.000000   -9999.000000       0.040400       0.722000
56462     56462     sichuan        101.5000       29.0000          124       126     2012      07        27        209              0.142375      14.111938       8.699536       0.295769   -9999.000000   -9999.000000   -9999.000000   -9999.000000
56462     56462     sichuan        101.5000       29.0000          124       126     2012      07        28        210              0.170625      12.087067       0.316615       0.306696       0.231000   -9999.000000   -9999.000000   -9999.000000
56462     56462     sichuan        101.5000       29.0000          124       126     2012      07        29        211              0.154042      12.389923       0.000000       0.297402       0.214500   -9999.000000       0.040400       0.614000
56462     56462     sichuan        101.5000       29.0000          124       126     2012      07        30        212              0.134625      14.041107       2.394603       0.288857       0.212000   -9999.000000       0.038500   -9999.000000
56462     56462     sichuan        101.5000       29.0000          124       126     2012      07        31        213              0.123542      15.169739      15.193797       0.289179   -9999.000000   -9999.000000       0.037300       0.902000
56462     56462     sichuan        101.5000       29.0000          124       126     2012      08        01        214              0.142042      12.368286       7.739866       0.306256       0.222000   -9999.000000   -9999.000000   -9999.000000
56462     56462     sichuan        101.5000       29.0000          124       126     2012      08        02        215              0.188208      11.572601       1.299170       0.312332       0.163000   -9999.000000   -9999.000000       0.876000
56462     56462     sichuan        101.5000       29.0000          124       126     2012      08        03        216              0.173958      12.732056       0.381094       0.300608       0.187500   -9999.000000   -9999.000000       0.825000
56462     56462     sichuan        101.5000       29.0000          124       126     2012      08        04        217              0.173833      13.851471       4.207157       0.291554       0.213000       0.136300       0.037400   -9999.000000
56462     56462     sichuan        101.5000       29.0000          124       126     2012      08        05        218              0.209750      14.035400      19.671276       0.293455   -9999.000000   -9999.000000       0.039400       0.873000
56462     56462     sichuan        101.5000       29.0000          124       126     2012      08        06        219              0.189500      12.812012       0.514854       0.317916   -9999.000000       0.097400       0.048900   -9999.000000
56462     56462     sichuan        101.5000       29.0000          124       126     2012      08        07        220              0.169917      12.895264       0.895346       0.299857       0.212000       0.049400   -9999.000000       0.747000
56462     56462     sichuan        101.5000       29.0000          124       126     2012      08        08        221              0.147458      13.308807       1.492336       0.291803       0.201500   -9999.000000   -9999.000000       0.701000
56462     56462     sichuan        101.5000       29.0000          124       126     2012      08        09        222              0.130708      14.723053       0.715276       0.288659       0.195500   -9999.000000       0.045800   -9999.000000
56462     56462     sichuan        101.5000       29.0000          124       126     2012      08        10        223              0.119083      14.184204       0.000000       0.286403       0.198000   -9999.000000       0.047000       0.393000
56462     56462     sichuan        101.5000       29.0000          124       126     2012      08        11        224              0.109250      14.666534       2.170593       0.280338   -9999.000000   -9999.000000       0.047200   -9999.000000
56462     56462     sichuan        101.5000       29.0000          124       126     2012      08        12        225              0.101792      16.515411       1.861743       0.275403       0.211000   -9999.000000       0.044300       0.532000
56462     56462     sichuan        101.5000       29.0000          124       126     2012      08        13        226              0.096417      15.973145       2.712749       0.278714       0.180000   -9999.000000   -9999.000000   -9999.000000
56462     56462     sichuan        101.5000       29.0000          124       126     2012      08        14        227              0.091667      15.809509       2.025003       0.283246       0.194000   -9999.000000   -9999.000000       0.594000
56462     56462     sichuan        101.5000       29.0000          124       126     2012      08        15        228              0.091875      15.329376       0.225346       0.283255       0.186000       0.166600       0.042900       0.707000
56462     56462     sichuan        101.5000       29.0000          124       126     2012      08        16        229              0.093208      14.141083       0.547931       0.283240   -9999.000000   -9999.000000       0.043100   -9999.000000
56462     56462     sichuan        101.5000       29.0000          124       126     2012      08        17        230              0.092500      14.703949       3.389282       0.280049   -9999.000000   -9999.000000       0.041500       0.593000
56462     56462     sichuan        101.5000       29.0000          124       126     2012      08        18        231              0.092542      14.830383       3.148194       0.281444       0.187000   -9999.000000   -9999.000000   -9999.000000
56462     56462     sichuan        101.5000       29.0000          124       126     2012      08        19        232              0.091083      14.847961       4.249499       0.290188       0.145000   -9999.000000   -9999.000000       0.565000
56462     56462     sichuan        101.5000       29.0000          124       126     2012      08        20        233              0.089667      13.856171       4.903208       0.285157       0.184000       0.052800   -9999.000000       0.675000
56462     56462     sichuan        101.5000       29.0000          124       126     2012      08        21        234              0.090542      15.198212      10.168164       0.291394       0.159000   -9999.000000       0.051900   -9999.000000
56462     56462     sichuan        101.5000       29.0000          124       126     2012      08        22        235              0.109542      10.835907      13.800996       0.300316   -9999.000000       0.136300       0.052200   -9999.000000
56462     56462     sichuan        101.5000       29.0000          124       126     2012      08        23        236              0.146417       9.385834      13.490233       0.313161   -9999.000000   -9999.000000       0.051300   -9999.000000
56462     56462     sichuan        101.5000       29.0000          124       126     2012      08        24        237              0.194750      10.543427       6.673565       0.312580   -9999.000000       0.078900   -9999.000000   -9999.000000
56462     56462     sichuan        101.5000       29.0000          124       126     2012      08        25        238              0.000000      11.160736       2.751442       0.314380       0.135000   -9999.000000   -9999.000000   -9999.000000
56462     56462     sichuan        101.5000       29.0000          124       126     2012      08        26        239              0.158750      12.530426       0.000000       0.299862       0.160000   -9999.000000       0.048100   -9999.000000
56462     56462     sichuan        101.5000       29.0000          124       126     2012      08        27        240              0.136208      13.230011       3.332588       0.289522   -9999.000000   -9999.000000       0.039900       0.554000
56462     56462     sichuan        101.5000       29.0000          124       126     2012      08        28        241              0.147708      13.647491       4.692888       0.288350       0.177000   -9999.000000       0.038700   -9999.000000
56462     56462     sichuan        101.5000       29.0000          124       126     2012      08        29        242              0.196542      12.580322      24.297310       0.298033       0.147000   -9999.000000       0.035700       1.000000
56462     56462     sichuan        101.5000       29.0000          124       126     2012      08        30        243              0.215042      12.436096       7.127151       0.318079       0.137000   -9999.000000   -9999.000000   -9999.000000
56462     56462     sichuan        101.5000       29.0000          124       126     2012      08        31        244              0.224250      13.324005      13.397908       0.312006       0.165000   -9999.000000   -9999.000000       0.948000
56462     56462     sichuan        101.5000       29.0000          124       126     2012      09        01        245              0.238375      13.287079      29.431721       0.317271   -9999.000000       0.030300       0.040700       1.000000
56462     56462     sichuan        101.5000       29.0000          124       126     2012      09        02        246              0.225917      12.261658       1.706554       0.329184   -9999.000000   -9999.000000       0.040500   -9999.000000
56462     56462     sichuan        101.5000       29.0000          124       126     2012      09        03        247              0.212042       9.794708       3.968066       0.311259   -9999.000000   -9999.000000       0.058200       0.815000
56462     56462     sichuan        101.5000       29.0000          124       126     2012      09        04        248              0.206958       8.597290       0.374083       0.306527       0.283000   -9999.000000   -9999.000000   -9999.000000
56462     56462     sichuan        101.5000       29.0000          124       126     2012      09        05        249              0.193000       9.781128      12.482123       0.304692       0.256000   -9999.000000   -9999.000000       0.701000
56462     56462     sichuan        101.5000       29.0000          124       126     2012      09        06        250              0.190125      11.362030       0.087883       0.310937       0.281000   -9999.000000       0.057900       0.758000
56462     56462     sichuan        101.5000       29.0000          124       126     2012      09        07        251              0.175042      12.289093       0.201190       0.303032   -9999.000000   -9999.000000       0.057100   -9999.000000
56462     56462     sichuan        101.5000       29.0000          124       126     2012      09        08        252              0.163208      13.166412      11.909582       0.296387   -9999.000000   -9999.000000       0.060700       0.833000
56462     56462     sichuan        101.5000       29.0000          124       126     2012      09        09        253              0.160542      12.460968       0.311249       0.310241       0.265000       0.173700       0.056300   -9999.000000
56462     56462     sichuan        101.5000       29.0000          124       126     2012      09        10        254              0.158458      12.872559       5.426132       0.299961   -9999.000000   -9999.000000   -9999.000000       0.830000
56462     56462     sichuan        101.5000       29.0000          124       126     2012      09        11        255              0.192792      12.717010      16.831049       0.303383   -9999.000000   -9999.000000   -9999.000000   -9999.000000
56462     56462     sichuan        101.5000       29.0000          124       126     2012      09        12        256              0.240667      11.046967      13.763170       0.315760   -9999.000000   -9999.000000       0.031400       0.758000
56462     56462     sichuan        101.5000       29.0000          124       126     2012      09        13        257              0.212500       7.723602       1.361038       0.322122   -9999.000000   -9999.000000       0.031800       0.689000
56462     56462     sichuan        101.5000       29.0000          124       126     2012      09        14        258              0.199917      10.074341       5.612650       0.304187   -9999.000000   -9999.000000       0.035100   -9999.000000
56462     56462     sichuan        101.5000       29.0000          124       126     2012      09        15        259              0.215000       8.622406       5.461513       0.308138       0.210000   -9999.000000       0.034800       0.848000
56462     56462     sichuan        101.5000       29.0000          124       126     2012      09        16        260              0.221583       7.641907       4.958609       0.308749       0.219000   -9999.000000   -9999.000000   -9999.000000
56462     56462     sichuan        101.5000       29.0000          124       126     2012      09        17        261              0.224125       8.861908      10.926722       0.308057   -9999.000000   -9999.000000   -9999.000000       0.949000
56462     56462     sichuan        101.5000       29.0000          124       126     2012      09        18        262              0.225333       9.257111       4.607099       0.315158   -9999.000000   -9999.000000       0.038000       0.680000
56462     56462     sichuan        101.5000       29.0000          124       126     2012      09        19        263              0.242750      10.677917       8.111218       0.309103   -9999.000000   -9999.000000       0.041700   -9999.000000
56462     56462     sichuan        101.5000       29.0000          124       126     2012      09        20        264              0.229292       9.687744       1.670944       0.312896       0.244000   -9999.000000       0.038400       0.852000
56462     56462     sichuan        101.5000       29.0000          124       126     2012      09        21        265              0.233333      11.312714       5.859458       0.302691   -9999.000000   -9999.000000   -9999.000000   -9999.000000
56462     56462     sichuan        101.5000       29.0000          124       126     2012      09        22        266              0.234542      11.756531       0.910225       0.305295       0.190000   -9999.000000   -9999.000000       0.843000
56462     56462     sichuan        101.5000       29.0000          124       126     2012      09        23        267              0.214125      11.231781       1.805333       0.299885   -9999.000000   -9999.000000       0.038500   -9999.000000
56462     56462     sichuan        101.5000       29.0000          124       126     2012      09        24        268              0.204292      11.661377       0.278723       0.297436   -9999.000000   -9999.000000       0.041500   -9999.000000
56462     56462     sichuan        101.5000       29.0000          124       126     2012      09        25        269              0.190292      11.397125       0.613794       0.293548       0.164000   -9999.000000       0.045000       0.556000
56462     56462     sichuan        101.5000       29.0000          124       126     2012      09        26        270              0.221958      12.066223       8.040292       0.289368       0.141000   -9999.000000       0.042000   -9999.000000
56462     56462     sichuan        101.5000       29.0000          124       126     2012      09        27        271              0.242571      12.084381       2.051686       0.299649       0.183000   -9999.000000   -9999.000000       0.809000
56462     56462     sichuan        101.5000       29.0000          124       126     2012      09        28        272              0.233333      10.959869       4.523638       0.296998   -9999.000000   -9999.000000   -9999.000000   -9999.000000
56462     56462     sichuan        101.5000       29.0000          124       126     2012      09        29        273              0.240292       9.649384       6.924248       0.300016   -9999.000000   -9999.000000       0.042900       0.882000
56462     56462     sichuan        101.5000       29.0000          124       126     2012      09        30        274              0.238917       9.894226       0.865418       0.302999   -9999.000000   -9999.000000       0.043100       0.896000
56462     56462     sichuan        101.5000       29.0000          124       126     2012      10        01        275              0.222833      10.017548       4.303760       0.296010       0.264000   -9999.000000       0.037200   -9999.000000
56462     56462     sichuan        101.5000       29.0000          124       126     2012      10        02        276              0.254667      11.277283      12.416622       0.294643       0.261500   -9999.000000   -9999.000000       1.000000
56462     56462     sichuan        101.5000       29.0000          124       126     2012      10        03        277              0.264708      10.563629      11.476686       0.308576   -9999.000000   -9999.000000   -9999.000000   -9999.000000
56462     56462     sichuan        101.5000       29.0000          124       126     2012      10        04        278              0.248875       8.404785       1.376719       0.316409   -9999.000000   -9999.000000   -9999.000000       1.000000
56462     56462     sichuan        101.5000       29.0000          124       126     2012      10        05        279              0.246167       8.556244       5.040396       0.301184   -9999.000000   -9999.000000       0.046300       1.000000
56462     56462     sichuan        101.5000       29.0000          124       126     2012      10        06        280              0.265292       7.912659       2.718529       0.301503   -9999.000000   -9999.000000       0.044200   -9999.000000
56462     56462     sichuan        101.5000       29.0000          124       126     2012      10        07        281              0.240292       7.818634       1.042010       0.303098       0.230000   -9999.000000       0.044000       0.538000
56462     56462     sichuan        101.5000       29.0000          124       126     2012      10        08        282              0.221667       9.352936       0.762336       0.293429       0.252000   -9999.000000   -9999.000000   -9999.000000
56462     56462     sichuan        101.5000       29.0000          124       126     2012      10        09        283              0.209500      10.337189       0.272138       0.289303   -9999.000000   -9999.000000   -9999.000000       0.675000
56462     56462     sichuan        101.5000       29.0000          124       126     2012      10        10        284              0.201708       8.463348       0.794506       0.287275   -9999.000000   -9999.000000       0.068300   -9999.000000
56462     56462     sichuan        101.5000       29.0000          124       126     2012      10        11        285              0.196542       8.205658       0.290575       0.287351       0.245000   -9999.000000       0.073200       0.696000
56462     56462     sichuan        101.5000       29.0000          124       126     2012      10        12        286              0.197708       8.985107       1.797790       0.285490       0.193000   -9999.000000       0.068000       0.829000
56462     56462     sichuan        101.5000       29.0000          124       126     2012      10        13        287              0.198125       8.600494       2.016593       0.288984       0.248000   -9999.000000       0.068700   -9999.000000
56462     56462     sichuan        101.5000       29.0000          124       126     2012      10        14        288              0.184000       9.676178       3.774021       0.284572       0.261000   -9999.000000   -9999.000000       0.603000
56462     56462     sichuan        101.5000       29.0000          124       126     2012      10        15        289              0.167125       9.071442       4.476780       0.281916   -9999.000000   -9999.000000   -9999.000000   -9999.000000
56462     56462     sichuan        101.5000       29.0000          124       126     2012      10        16        290              0.152792       8.257080      10.841008       0.280300   -9999.000000   -9999.000000       0.078800       0.477000
56462     56462     sichuan        101.5000       29.0000          124       126     2012      10        17        291              0.147458       7.577332       3.077912       0.293165       0.230000   -9999.000000       0.078800       0.422000
56462     56462     sichuan        101.5000       29.0000          124       126     2012      10        18        292              0.137750       5.672058       2.787434       0.299965       0.232000   -9999.000000       0.078900   -9999.000000
56462     56462     sichuan        101.5000       29.0000          124       126     2012      10        19        293              0.127042       7.289459       0.441119       0.291879       0.241000   -9999.000000   -9999.000000       0.354000
56462     56462     sichuan        101.5000       29.0000          124       126     2012      10        20        294              0.118042       7.392975       0.539649       0.284676   -9999.000000   -9999.000000   -9999.000000   -9999.000000
56462     56462     sichuan        101.5000       29.0000          124       126     2012      10        21        295              0.110917       7.669739       2.081359       0.281145   -9999.000000   -9999.000000   -9999.000000       0.613000
56462     56462     sichuan        101.5000       29.0000          124       126     2012      10        22        296              0.104125       8.199036       1.561434       0.280617   -9999.000000   -9999.000000       0.071000   -9999.000000
56462     56462     sichuan        101.5000       29.0000          124       126     2012      10        23        297              0.099292       7.461426       0.540721       0.279180   -9999.000000   -9999.000000       0.070300   -9999.000000
56462     56462     sichuan        101.5000       29.0000          124       126     2012      10        24        298              0.095417       7.408691       0.702446       0.277350   -9999.000000   -9999.000000       0.071900       0.313000
56462     56462     sichuan        101.5000       29.0000          124       126     2012      10        25        299              0.000000       5.614746       1.601555       0.273318   -9999.000000   -9999.000000   -9999.000000   -9999.000000
56462     56462     sichuan        101.5000       29.0000          124       126     2012      10        26        300              0.089833       5.840729       0.000000       0.272415   -9999.000000   -9999.000000   -9999.000000       0.455000
56462     56462     sichuan        101.5000       29.0000          124       126     2012      10        27        301              0.088167       6.351227       0.392066       0.272008   -9999.000000   -9999.000000       0.070300   -9999.000000
56462     56462     sichuan        101.5000       29.0000          124       126     2012      10        28        302              0.000000       6.220306       0.456877       0.269584       0.298000   -9999.000000       0.071300       0.291000
56462     56462     sichuan        101.5000       29.0000          124       126     2012      10        29        303              0.085875       6.308319       2.735856       0.267749       0.277000   -9999.000000       0.070400       0.468000
56462     56462     sichuan        101.5000       29.0000          124       126     2012      10        30        304              0.084500       5.945007       1.437966       0.267476       0.305000   -9999.000000       0.070800   -9999.000000
56462     56462     sichuan        101.5000       29.0000          124       126     2012      10        31        305              0.084042       4.805481       1.680967       0.264895   -9999.000000   -9999.000000   -9999.000000       0.235000
56462     56462     sichuan        101.5000       29.0000          124       126     2012      11        01        306              0.083625       3.742340       1.862039       0.259601   -9999.000000   -9999.000000   -9999.000000   -9999.000000
56462     56462     sichuan        101.5000       29.0000          124       126     2012      11        02        307              0.082750       4.451019       0.540362       0.262045       0.228000   -9999.000000       0.071300       0.165000
56462     56462     sichuan        101.5000       29.0000          124       126     2012      11        03        308              0.082292       4.830719       6.607931       0.262101       0.208000   -9999.000000       0.072800       0.264000
56462     56462     sichuan        101.5000       29.0000          124       126     2012      11        04        309              0.082667       4.452179       3.989680       0.252532       0.245000   -9999.000000       0.073000   -9999.000000
56462     56462     sichuan        101.5000       29.0000          124       126     2012      11        05        310              0.082417       4.321075       2.401091       0.256187   -9999.000000   -9999.000000   -9999.000000       0.037000
56462     56462     sichuan        101.5000       29.0000          124       126     2012      11        06        311              0.082333       5.195435       0.898891       0.263218   -9999.000000   -9999.000000   -9999.000000   -9999.000000
56462     56462     sichuan        101.5000       29.0000          124       126     2012      11        07        312              0.081833       5.194702       0.000000       0.260322       0.224000   -9999.000000       0.073300       0.324000
56462     56462     sichuan        101.5000       29.0000          124       126     2012      11        08        313              0.081667       4.838287       0.308651       0.254312       0.196000   -9999.000000       0.071900   -9999.000000
56462     56462     sichuan        101.5000       29.0000          124       126     2012      11        09        314              0.081542       4.031830       2.200568       0.249445       0.239000   -9999.000000       0.071200       0.135000
56462     56462     sichuan        101.5000       29.0000          124       126     2012      11        10        315              0.080500       4.106262       0.725747       0.248851       0.259000   -9999.000000       0.070400       0.197000
56462     56462     sichuan        101.5000       29.0000          124       126     2012      11        11        316              0.079875       3.726501       0.000000       0.239255   -9999.000000   -9999.000000   -9999.000000   -9999.000000
56462     56462     sichuan        101.5000       29.0000          124       126     2012      11        12        317              0.080000       3.389923       0.000000       0.237684   -9999.000000   -9999.000000   -9999.000000       0.111000
56462     56462     sichuan        101.5000       29.0000          124       126     2012      11        13        318              0.000000       3.702271       0.000000       0.236728       0.340000   -9999.000000       0.083800   -9999.000000
56462     56462     sichuan        101.5000       29.0000          124       126     2012      11        14        319              0.083208       3.587433       0.000000       0.231458       0.292000   -9999.000000       0.084900       0.223000
56462     56462     sichuan        101.5000       29.0000          124       126     2012      11        15        320              0.082542       2.915283       0.714167       0.225706       0.299000   -9999.000000       0.085600       0.029000
56462     56462     sichuan        101.5000       29.0000          124       126     2012      11        16        321              0.081917       3.338562       0.000000       0.227926   -9999.000000   -9999.000000       0.083500   -9999.000000
56462     56462     sichuan        101.5000       29.0000          124       126     2012      11        17        322              0.000000       2.083588       2.289686       0.208488   -9999.000000   -9999.000000   -9999.000000       0.100000
56462     56462     sichuan        101.5000       29.0000          124       126     2012      11        18        323              0.084125       2.011841       0.370455       0.209408       0.293000   -9999.000000   -9999.000000   -9999.000000
56462     56462     sichuan        101.5000       29.0000          124       126     2012      11        19        324              0.084417       2.491943      12.376042       0.217209       0.246000   -9999.000000       0.070500       0.253000
56462     56462     sichuan        101.5000       29.0000          124       126     2012      11        20        325              0.085292       2.956360       0.000000       0.225199       0.290000   -9999.000000       0.071400   -9999.000000
56462     56462     sichuan        101.5000       29.0000          124       126     2012      11        21        326              0.085000       3.240356       0.000000       0.227061   -9999.000000   -9999.000000       0.071000   -9999.000000
56462     56462     sichuan        101.5000       29.0000          124       126     2012      11        22        327              0.084792       3.422455       0.000000       0.229712   -9999.000000   -9999.000000   -9999.000000       0.175000
56462     56462     sichuan        101.5000       29.0000          124       126     2012      11        23        328              0.085125       3.286133       0.000000       0.227724   -9999.000000   -9999.000000   -9999.000000   -9999.000000
56462     56462     sichuan        101.5000       29.0000          124       126     2012      11        24        329              0.086208       2.870270       2.864580       0.223102       0.284000   -9999.000000       0.071900       0.405000
56462     56462     sichuan        101.5000       29.0000          124       126     2012      11        25        330              0.085375       3.407227       1.393808       0.225368       0.267000   -9999.000000       0.072500   -9999.000000
56462     56462     sichuan        101.5000       29.0000          124       126     2012      11        26        331              0.083875       2.414795       5.064359       0.214995       0.272000   -9999.000000   -9999.000000       0.037000
56462     56462     sichuan        101.5000       29.0000          124       126     2012      11        27        332              0.083167       1.429962       0.216183       0.198529   -9999.000000   -9999.000000       0.067700       0.237000
56462     56462     sichuan        101.5000       29.0000          124       126     2012      11        28        333              0.083125       1.153748       0.000000       0.190438   -9999.000000   -9999.000000   -9999.000000   -9999.000000
56462     56462     sichuan        101.5000       29.0000          124       126     2012      11        29        334              0.082625       1.459808       0.206661       0.194607       0.295000   -9999.000000   -9999.000000       0.231000
56462     56462     sichuan        101.5000       29.0000          124       126     2012      11        30        335              0.084708       1.735931       0.583565       0.199731       0.271000   -9999.000000       0.066700   -9999.000000
56462     56462     sichuan        101.5000       29.0000          124       126     2012      12        01        336              0.083667       1.788361       0.000000       0.197642       0.289000   -9999.000000       0.069900       0.091000
56462     56462     sichuan        101.5000       29.0000          124       126     2012      12        02        337              0.084583       1.244720       0.947164       0.187487   -9999.000000   -9999.000000       0.067600       0.216000
56462     56462     sichuan        101.5000       29.0000          124       126     2012      12        03        338              0.083625       0.660248       2.507717       0.178252   -9999.000000   -9999.000000   -9999.000000   -9999.000000
56462     56462     sichuan        101.5000       29.0000          124       126     2012      12        04        339              0.085083       0.804932       1.447517       0.181995       0.272000   -9999.000000   -9999.000000       0.094000
56462     56462     sichuan        101.5000       29.0000          124       126     2012      12        05        340              0.085917       1.197296       0.716632       0.187410       0.267000   -9999.000000   -9999.000000   -9999.000000
56462     56462     sichuan        101.5000       29.0000          124       126     2012      12        06        341              0.084958       0.662994       0.910978       0.180192       0.293000   -9999.000000       0.080200       0.036000
56462     56462     sichuan        101.5000       29.0000          124       126     2012      12        07        342              0.083458       0.814270       1.006559       0.181095       0.310000   -9999.000000       0.082000   -9999.000000
56462     56462     sichuan        101.5000       29.0000          124       126     2012      12        08        343              0.083333       0.592163       2.086918       0.177360   -9999.000000   -9999.000000       0.081400       0.150000
56462     56462     sichuan        101.5000       29.0000          124       126     2012      12        09        344              0.083792       1.050537       0.798865       0.188619   -9999.000000   -9999.000000   -9999.000000       0.088000
56462     56462     sichuan        101.5000       29.0000          124       126     2012      12        10        345              0.083000       1.086334       0.479829       0.191750       0.298000   -9999.000000   -9999.000000   -9999.000000
56462     56462     sichuan        101.5000       29.0000          124       126     2012      12        11        346              0.083042       1.091339       0.264448       0.188072       0.259000   -9999.000000       0.076800       0.190000
56462     56462     sichuan        101.5000       29.0000          124       126     2012      12        12        347              0.082333       0.988739       0.517107       0.187446       0.270000   -9999.000000       0.078000   -9999.000000
56462     56462     sichuan        101.5000       29.0000          124       126     2012      12        13        348              0.081292       0.730530       0.269029       0.182685   -9999.000000   -9999.000000       0.075900       0.179000
56462     56462     sichuan        101.5000       29.0000          124       126     2012      12        14        349              0.081125       0.372772       0.712284       0.175522   -9999.000000   -9999.000000       0.077300       0.082000
56462     56462     sichuan        101.5000       29.0000          124       126     2012      12        15        350              0.000000       0.169373       0.431686       0.171693       0.234000   -9999.000000   -9999.000000   -9999.000000
56462     56462     sichuan        101.5000       29.0000          124       126     2012      12        16        351              0.081292      -0.071228       2.008664       0.165729       0.221000   -9999.000000   -9999.000000       0.290000
56462     56462     sichuan        101.5000       29.0000          124       126     2012      12        17        352              0.082125       0.323730       0.000000       0.170259       0.262000   -9999.000000       0.077800   -9999.000000
56462     56462     sichuan        101.5000       29.0000          124       126     2012      12        18        353              0.082417       1.114807       0.000000       0.185379   -9999.000000   -9999.000000       0.082300       0.245000
56462     56462     sichuan        101.5000       29.0000          124       126     2012      12        19        354              0.083000       1.062469       0.000000       0.185273   -9999.000000   -9999.000000       0.079600   -9999.000000
56462     56462     sichuan        101.5000       29.0000          124       126     2012      12        20        355              0.000000       0.743561       1.402499       0.180016   -9999.000000   -9999.000000   -9999.000000   -9999.000000
56462     56462     sichuan        101.5000       29.0000          124       126     2012      12        21        356              0.084333      -0.038818       0.000000       0.167574       0.336000   -9999.000000   -9999.000000       0.105000
56462     56462     sichuan        101.5000       29.0000          124       126     2012      12        22        357              0.083125       0.301270       0.000000       0.172457       0.290000   -9999.000000       0.080200   -9999.000000
56462     56462     sichuan        101.5000       29.0000          124       126     2012      12        23        358              0.082542      -0.285034       2.516268       0.162962       0.307000   -9999.000000       0.078400       0.233000
56462     56462     sichuan        101.5000       29.0000          124       126     2012      12        24        359              0.080684      -2.166504       5.943510       0.136076   -9999.000000   -9999.000000       0.079000   -9999.000000
56462     56462     sichuan        101.5000       29.0000          124       126     2012      12        25        360              0.082417      -1.217163       0.000000       0.146637   -9999.000000   -9999.000000       0.075600       0.175000
56462     56462     sichuan        101.5000       29.0000          124       126     2012      12        26        361              0.000000      -1.921539       0.000000       0.133047       0.340000   -9999.000000   -9999.000000       0.300000
56462     56462     sichuan        101.5000       29.0000          124       126     2012      12        27        362              0.083727      -2.221039       0.263269       0.131734   -9999.000000   -9999.000000   -9999.000000   -9999.000000
56462     56462     sichuan        101.5000       29.0000          124       126     2012      12        28        363              0.080000      -2.227295       0.000000       0.128787       0.300000   -9999.000000       0.075300       0.166000
56462     56462     sichuan        101.5000       29.0000          124       126     2012      12        29        364              0.000000      -1.116608       0.000000       0.146895   -9999.000000   -9999.000000       0.078100   -9999.000000
56462     56462     sichuan        101.5000       29.0000          124       126     2012      12        30        365              0.000000      -1.485535       0.000000       0.139032   -9999.000000   -9999.000000       0.077600       0.055000
56462     56462     sichuan        101.5000       29.0000          124       126     2012      12        31        366              0.083600      -2.576630       0.000000       0.122929   -9999.000000   -9999.000000       0.086400       0.016000
