# Supplementary material for: Research on Fusing Multisatellite Soil Moisture Data Based on Bayesian Model Averaging
Source: Hindawi journal article supplement (doi:10.1155/2018/9310838), 2018-06-25
Supplement: f1 [file 9310838.f1.zip › 2012_sm00-10cm_daily_ZDB_ZHY_56598_366days_allin.txt]

56598     56598     guizhou        104.7256       27.1225          132       139     2012      01        01        001              0.000000   -9999.000000       0.731483   -9999.000000       0.153000       0.171500   -9999.000000   -9999.000000
56598     56598     guizhou        104.7256       27.1225          132       139     2012      01        02        002              0.247000       0.772888       0.724413       0.209256   -9999.000000   -9999.000000   -9999.000000   -9999.000000
56598     56598     guizhou        104.7256       27.1225          132       139     2012      01        03        003              0.000000       1.349396       0.409910       0.229990   -9999.000000   -9999.000000       0.036900       0.217000
56598     56598     guizhou        104.7256       27.1225          132       139     2012      01        04        004              0.245909       0.407532       1.088497       0.201253   -9999.000000   -9999.000000       0.038700       0.208000
56598     56598     guizhou        104.7256       27.1225          132       139     2012      01        05        005              0.242583       0.257355       1.289034       0.194302   -9999.000000   -9999.000000       0.035000   -9999.000000
56598     56598     guizhou        104.7256       27.1225          132       139     2012      01        06        006              0.241000       0.398285       1.020325       0.200581   -9999.000000   -9999.000000   -9999.000000       0.118000
56598     56598     guizhou        104.7256       27.1225          132       139     2012      01        07        007              0.241250       0.558777       0.692789       0.207005   -9999.000000   -9999.000000   -9999.000000   -9999.000000
56598     56598     guizhou        104.7256       27.1225          132       139     2012      01        08        008              0.000000       0.580994       1.900708       0.208433   -9999.000000   -9999.000000   -9999.000000       0.408000
56598     56598     guizhou        104.7256       27.1225          132       139     2012      01        09        009              0.248750       0.916595       0.709729       0.227256   -9999.000000   -9999.000000       0.043300       0.453000
56598     56598     guizhou        104.7256       27.1225          132       139     2012      01        10        010              0.251087       1.197845       0.356722       0.233311   -9999.000000   -9999.000000       0.053300       0.472000
56598     56598     guizhou        104.7256       27.1225          132       139     2012      01        11        011              0.249957       1.164459       0.588416       0.230358   -9999.000000   -9999.000000       0.044200       0.742000
56598     56598     guizhou        104.7256       27.1225          132       139     2012      01        12        012              0.252083       1.033386       0.185392       0.226160       0.108000   -9999.000000   -9999.000000   -9999.000000
56598     56598     guizhou        104.7256       27.1225          132       139     2012      01        13        013              0.247870       3.537476       0.088214       0.259754   -9999.000000   -9999.000000   -9999.000000       0.332000
56598     56598     guizhou        104.7256       27.1225          132       139     2012      01        14        014              0.247348       3.673553       0.069430       0.266445   -9999.000000   -9999.000000       0.047100   -9999.000000
56598     56598     guizhou        104.7256       27.1225          132       139     2012      01        15        015              0.250000       2.147125       0.104340       0.258531       0.131000   -9999.000000       0.044900       0.077000
56598     56598     guizhou        104.7256       27.1225          132       139     2012      01        16        016              0.244478       3.166077       0.000000       0.260869       0.130500   -9999.000000       0.051900       0.356000
56598     56598     guizhou        104.7256       27.1225          132       139     2012      01        17        017              0.000000       7.737549       0.223610       0.266380   -9999.000000   -9999.000000   -9999.000000   -9999.000000
56598     56598     guizhou        104.7256       27.1225          132       139     2012      01        18        018              0.242217       2.759064       0.389362       0.265829   -9999.000000   -9999.000000   -9999.000000       0.251000
56598     56598     guizhou        104.7256       27.1225          132       139     2012      01        19        019              0.241909       2.356445       0.135804       0.263703   -9999.000000   -9999.000000   -9999.000000   -9999.000000
56598     56598     guizhou        104.7256       27.1225          132       139     2012      01        20        020              0.241000       3.002502       0.078265       0.264276       0.134000   -9999.000000       0.058600       0.029000
56598     56598     guizhou        104.7256       27.1225          132       139     2012      01        21        021              0.238833       2.771576       0.148328       0.260573   -9999.000000   -9999.000000       0.057100       0.066000
56598     56598     guizhou        104.7256       27.1225          132       139     2012      01        22        022              0.237000       1.626282       0.000000       0.243834   -9999.000000   -9999.000000       0.048500   -9999.000000
56598     56598     guizhou        104.7256       27.1225          132       139     2012      01        23        023              0.242652       0.692078       2.195850       0.211077   -9999.000000   -9999.000000   -9999.000000       0.201000
56598     56598     guizhou        104.7256       27.1225          132       139     2012      01        24        024              0.241000       1.879547       3.846647       0.237297   -9999.000000   -9999.000000   -9999.000000   -9999.000000
56598     56598     guizhou        104.7256       27.1225          132       139     2012      01        25        025              0.237500       0.469940       0.160735       0.201308   -9999.000000       0.032400   -9999.000000       0.070000
56598     56598     guizhou        104.7256       27.1225          132       139     2012      01        26        026              0.244583       0.294464       0.222608       0.188177   -9999.000000   -9999.000000       0.044500   -9999.000000
56598     56598     guizhou        104.7256       27.1225          132       139     2012      01        27        027              0.242565       0.736450       0.421980       0.205993   -9999.000000   -9999.000000       0.044900       0.155000
56598     56598     guizhou        104.7256       27.1225          132       139     2012      01        28        028              0.243917       0.531128       0.204761       0.203862   -9999.000000   -9999.000000       0.035300       0.419000
56598     56598     guizhou        104.7256       27.1225          132       139     2012      01        29        029              0.243000       0.748108       0.138852       0.206210   -9999.000000   -9999.000000   -9999.000000   -9999.000000
56598     56598     guizhou        104.7256       27.1225          132       139     2012      01        30        030              0.245500       0.823151       0.242551       0.211789   -9999.000000   -9999.000000   -9999.000000       0.346000
56598     56598     guizhou        104.7256       27.1225          132       139     2012      01        31        031              0.247182       0.977600       0.657100       0.215762       0.102000   -9999.000000       0.059600   -9999.000000
56598     56598     guizhou        104.7256       27.1225          132       139     2012      02        01        032              0.243000       1.880615       0.097389       0.241747       0.104000       0.032500       0.063300       0.245000
56598     56598     guizhou        104.7256       27.1225          132       139     2012      02        02        033              0.244391       2.633698       0.587535       0.255206   -9999.000000   -9999.000000       0.053600       0.297000
56598     56598     guizhou        104.7256       27.1225          132       139     2012      02        03        034              0.242364       1.811554       0.349272       0.251230   -9999.000000   -9999.000000   -9999.000000   -9999.000000
56598     56598     guizhou        104.7256       27.1225          132       139     2012      02        04        035              0.241000       7.048981       0.000000       0.266238       0.112000   -9999.000000   -9999.000000       0.003000
56598     56598     guizhou        104.7256       27.1225          132       139     2012      02        05        036              0.236125      11.165710       0.273940       0.266651       0.119500   -9999.000000   -9999.000000   -9999.000000
56598     56598     guizhou        104.7256       27.1225          132       139     2012      02        06        037              0.235000       8.170288       0.046167       0.265798       0.103000   -9999.000000       0.061000       0.071000
56598     56598     guizhou        104.7256       27.1225          132       139     2012      02        07        038              0.234083       4.907074       0.271587       0.265972   -9999.000000       0.082900       0.067400       0.070000
56598     56598     guizhou        104.7256       27.1225          132       139     2012      02        08        039              0.240826       4.039734       0.211716       0.266552   -9999.000000   -9999.000000       0.056600       0.092000
56598     56598     guizhou        104.7256       27.1225          132       139     2012      02        09        040              0.241609       2.578339       0.117719       0.261002   -9999.000000       0.036300   -9999.000000       0.038000
56598     56598     guizhou        104.7256       27.1225          132       139     2012      02        10        041              0.238500       2.878662       0.199682       0.247111   -9999.000000   -9999.000000   -9999.000000   -9999.000000
56598     56598     guizhou        104.7256       27.1225          132       139     2012      02        11        042              0.241083       0.719208       0.457552       0.209190   -9999.000000       0.058300   -9999.000000       0.200000
56598     56598     guizhou        104.7256       27.1225          132       139     2012      02        12        043              0.239333       2.740265       0.000000       0.251981       0.116000   -9999.000000       0.050600   -9999.000000
56598     56598     guizhou        104.7256       27.1225          132       139     2012      02        13        044              0.235583      10.063934       0.000000       0.263615   -9999.000000   -9999.000000       0.053400   -9999.000000
56598     56598     guizhou        104.7256       27.1225          132       139     2012      02        14        045              0.232000      10.832855       0.000000       0.260142   -9999.000000       0.107300   -9999.000000       0.009000
56598     56598     guizhou        104.7256       27.1225          132       139     2012      02        15        046              0.232000       5.661072       0.000000       0.261568       0.124500   -9999.000000   -9999.000000   -9999.000000
56598     56598     guizhou        104.7256       27.1225          132       139     2012      02        16        047              0.232000       3.231659       0.199140       0.260408       0.122000       0.029800   -9999.000000       0.128000
56598     56598     guizhou        104.7256       27.1225          132       139     2012      02        17        048              0.233875       2.816864       0.111207       0.260106       0.118000   -9999.000000       0.064200   -9999.000000
56598     56598     guizhou        104.7256       27.1225          132       139     2012      02        18        049              0.000000       2.183533       0.000000       0.251743   -9999.000000   -9999.000000       0.058100       0.272000
56598     56598     guizhou        104.7256       27.1225          132       139     2012      02        19        050              0.247400       1.500732       0.530487       0.234791   -9999.000000       0.076700       0.056200       0.448000
56598     56598     guizhou        104.7256       27.1225          132       139     2012      02        20        051              0.242500       3.978119       0.522835       0.257849       0.129000   -9999.000000   -9999.000000   -9999.000000
56598     56598     guizhou        104.7256       27.1225          132       139     2012      02        21        052              0.241000       7.493317       0.543864       0.264331       0.097500   -9999.000000   -9999.000000       0.285000
56598     56598     guizhou        104.7256       27.1225          132       139     2012      02        22        053              0.239000       6.930847       0.112110       0.266166       0.094500       0.040200   -9999.000000   -9999.000000
56598     56598     guizhou        104.7256       27.1225          132       139     2012      02        23        054              0.000000       6.562256       0.399760       0.265164       0.072000   -9999.000000       0.055800       0.005000
56598     56598     guizhou        104.7256       27.1225          132       139     2012      02        24        055              0.236294       7.054108       1.390288       0.265712   -9999.000000       0.133200       0.057000   -9999.000000
56598     56598     guizhou        104.7256       27.1225          132       139     2012      02        25        056              0.239000       5.263397       0.747797       0.270018   -9999.000000       0.195400       0.050300       0.263000
56598     56598     guizhou        104.7256       27.1225          132       139     2012      02        26        057              0.241000       3.862000       0.559942       0.268141   -9999.000000   -9999.000000   -9999.000000       0.186000
56598     56598     guizhou        104.7256       27.1225          132       139     2012      02        27        058              0.239833       2.231659       0.646713       0.255633   -9999.000000   -9999.000000   -9999.000000   -9999.000000
56598     56598     guizhou        104.7256       27.1225          132       139     2012      02        28        059              0.237000       2.503143       0.156886       0.259298       0.087000   -9999.000000   -9999.000000       0.094000
56598     56598     guizhou        104.7256       27.1225          132       139     2012      02        29        060              0.000000   -9999.000000       1.846804   -9999.000000   -9999.000000       0.093000   -9999.000000   -9999.000000
56598     56598     guizhou        104.7256       27.1225          132       139     2012      03        01        061              0.235783       4.394226       0.084577       0.263068   -9999.000000       0.101600       0.050800       0.004000
56598     56598     guizhou        104.7256       27.1225          132       139     2012      03        02        062              0.235000       8.230621       0.405441       0.265394       0.125500   -9999.000000       0.042400       0.161000
56598     56598     guizhou        104.7256       27.1225          132       139     2012      03        03        063              0.234125       9.573639       0.633847       0.265106       0.115000       0.413700   -9999.000000   -9999.000000
56598     56598     guizhou        104.7256       27.1225          132       139     2012      03        04        064              0.231167      11.174255       0.326551       0.265329       0.103000   -9999.000000   -9999.000000       0.039000
56598     56598     guizhou        104.7256       27.1225          132       139     2012      03        05        065              0.227500      11.924377       0.000000       0.261212   -9999.000000       0.022800       0.059500   -9999.000000
56598     56598     guizhou        104.7256       27.1225          132       139     2012      03        06        066              0.226000      14.524963       0.386870       0.255632   -9999.000000       0.222300       0.065000       0.150000
56598     56598     guizhou        104.7256       27.1225          132       139     2012      03        07        067              0.000000       7.193207       0.290234       0.259828       0.125000   -9999.000000       0.056600       0.152000
56598     56598     guizhou        104.7256       27.1225          132       139     2012      03        08        068              0.228000       5.821411       0.456199       0.262711       0.105000       0.118400   -9999.000000       0.037000
56598     56598     guizhou        104.7256       27.1225          132       139     2012      03        09        069              0.227826       4.398254       0.253391       0.263695   -9999.000000   -9999.000000   -9999.000000       0.202000
56598     56598     guizhou        104.7256       27.1225          132       139     2012      03        10        070              0.226261       2.974548       1.381380       0.259373   -9999.000000   -9999.000000   -9999.000000   -9999.000000
56598     56598     guizhou        104.7256       27.1225          132       139     2012      03        11        071              0.227652       3.676910       0.208372       0.264910   -9999.000000   -9999.000000       0.066900       0.185000
56598     56598     guizhou        104.7256       27.1225          132       139     2012      03        12        072              0.232625       4.927704       1.432725       0.266838       0.141000   -9999.000000       0.079800   -9999.000000
56598     56598     guizhou        104.7256       27.1225          132       139     2012      03        13        073              0.233500       4.022888       0.137509       0.269595       0.129000       0.124500       0.068200       0.179000
56598     56598     guizhou        104.7256       27.1225          132       139     2012      03        14        074              0.230333       7.559265       0.000000       0.268511       0.116500       0.127700   -9999.000000       0.497000
56598     56598     guizhou        104.7256       27.1225          132       139     2012      03        15        075              0.225304      14.232819       0.418199       0.261202       0.105000   -9999.000000   -9999.000000   -9999.000000
56598     56598     guizhou        104.7256       27.1225          132       139     2012      03        16        076              0.219913      16.473724       0.000000       0.255221   -9999.000000       0.065800       0.069200       0.149000
56598     56598     guizhou        104.7256       27.1225          132       139     2012      03        17        077              0.215000      16.215729       0.373485       0.251260       0.109000   -9999.000000       0.068700   -9999.000000
56598     56598     guizhou        104.7256       27.1225          132       139     2012      03        18        078              0.209500      16.779907       0.000000       0.248320       0.112000       0.058400       0.067600       0.093000
56598     56598     guizhou        104.7256       27.1225          132       139     2012      03        19        079              0.204304      17.666992       0.080991       0.242266       0.106500       0.142400       0.062000       0.101000
56598     56598     guizhou        104.7256       27.1225          132       139     2012      03        20        080              0.199458      18.948547       0.000000       0.237457       0.104000   -9999.000000   -9999.000000   -9999.000000
56598     56598     guizhou        104.7256       27.1225          132       139     2012      03        21        081              0.193632      20.184479       0.000000       0.233990   -9999.000000       0.051500   -9999.000000       0.198000
56598     56598     guizhou        104.7256       27.1225          132       139     2012      03        22        082              0.189625      21.154266       0.312280       0.229619   -9999.000000   -9999.000000       0.078900   -9999.000000
56598     56598     guizhou        104.7256       27.1225          132       139     2012      03        23        083              0.204217      12.819702       0.333678       0.236989       0.145000   -9999.000000       0.076400       0.047000
56598     56598     guizhou        104.7256       27.1225          132       139     2012      03        24        084              0.202292       5.746826       0.046655       0.245029       0.106000   -9999.000000       0.063400   -9999.000000
56598     56598     guizhou        104.7256       27.1225          132       139     2012      03        25        085              0.000000      12.692108       2.133784       0.240898       0.110000   -9999.000000   -9999.000000   -9999.000000
56598     56598     guizhou        104.7256       27.1225          132       139     2012      03        26        086              0.218833      14.872345       2.044149       0.244633   -9999.000000       0.069600   -9999.000000       0.553000
56598     56598     guizhou        104.7256       27.1225          132       139     2012      03        27        087              0.231417      12.730072       5.352565       0.256359   -9999.000000   -9999.000000   -9999.000000   -9999.000000
56598     56598     guizhou        104.7256       27.1225          132       139     2012      03        28        088              0.238917      14.775421       1.600385       0.270677       0.145000       0.090800       0.085100       0.194000
56598     56598     guizhou        104.7256       27.1225          132       139     2012      03        29        089              0.236667      16.709015       0.649848       0.268671       0.146500       0.194100       0.081600   -9999.000000
56598     56598     guizhou        104.7256       27.1225          132       139     2012      03        30        090              0.237917      11.664062       4.539558       0.267929       0.147000   -9999.000000       0.074300       0.640000
56598     56598     guizhou        104.7256       27.1225          132       139     2012      03        31        091              0.247250       9.283722       0.907763       0.272422       0.152000       0.230200   -9999.000000       0.746000
56598     56598     guizhou        104.7256       27.1225          132       139     2012      04        01        092              0.234542       9.848541       0.000000       0.276410   -9999.000000       0.094200   -9999.000000   -9999.000000
56598     56598     guizhou        104.7256       27.1225          132       139     2012      04        02        093              0.218000      16.507599       0.000000       0.260922       0.105000   -9999.000000       0.078300       0.010000
56598     56598     guizhou        104.7256       27.1225          132       139     2012      04        03        094              0.203208      20.436035       0.000000       0.250585       0.100000       0.066400       0.076300   -9999.000000
56598     56598     guizhou        104.7256       27.1225          132       139     2012      04        04        095              0.191208      19.418274       0.000000       0.247562       0.098500   -9999.000000       0.074400       0.186000
56598     56598     guizhou        104.7256       27.1225          132       139     2012      04        05        096              0.183750      17.483063       1.838359       0.243867       0.083000       0.085000       0.063200       0.138000
56598     56598     guizhou        104.7256       27.1225          132       139     2012      04        06        097              0.199875      15.537048       1.915926       0.248513   -9999.000000       0.201600   -9999.000000       0.255000
56598     56598     guizhou        104.7256       27.1225          132       139     2012      04        07        098              0.217583      11.751740       2.471725       0.259146   -9999.000000   -9999.000000   -9999.000000       0.751000
56598     56598     guizhou        104.7256       27.1225          132       139     2012      04        08        099              0.236625      10.356171       6.535993       0.270400       0.136000       0.362300       0.097800   -9999.000000
56598     56598     guizhou        104.7256       27.1225          132       139     2012      04        09        100              0.240000      10.466766       0.172414       0.281753       0.121000   -9999.000000       0.092600       0.443000
56598     56598     guizhou        104.7256       27.1225          132       139     2012      04        10        101              0.224833      17.605377       0.792005       0.269141       0.107000   -9999.000000       0.079300   -9999.000000
56598     56598     guizhou        104.7256       27.1225          132       139     2012      04        11        102              0.209043      19.127625       0.185318       0.260921   -9999.000000       0.211800   -9999.000000       0.208000
56598     56598     guizhou        104.7256       27.1225          132       139     2012      04        12        103              0.199000      19.618103       0.280840       0.254766   -9999.000000   -9999.000000   -9999.000000       0.264000
56598     56598     guizhou        104.7256       27.1225          132       139     2012      04        13        104              0.192917      14.513153       0.000000       0.254190       0.118000       0.120800   -9999.000000   -9999.000000
56598     56598     guizhou        104.7256       27.1225          132       139     2012      04        14        105              0.180000      14.246918       0.000000       0.251170       0.106000   -9999.000000       0.078500       0.247000
56598     56598     guizhou        104.7256       27.1225          132       139     2012      04        15        106              0.165750      19.174408       0.000000       0.242250       0.101500       0.199900       0.080400   -9999.000000
56598     56598     guizhou        104.7256       27.1225          132       139     2012      04        16        107              0.159500      18.327057       0.000000       0.237386   -9999.000000       0.293800       0.070100       0.157000
56598     56598     guizhou        104.7256       27.1225          132       139     2012      04        17        108              0.160375      13.580872       0.000000       0.242600   -9999.000000   -9999.000000   -9999.000000       0.138000
56598     56598     guizhou        104.7256       27.1225          132       139     2012      04        18        109              0.161000      12.971649       0.000000       0.245289       0.117000       0.235500   -9999.000000   -9999.000000
56598     56598     guizhou        104.7256       27.1225          132       139     2012      04        19        110              0.176208      14.290314      12.991431       0.245879       0.119000       0.002000       0.097200       1.000000
56598     56598     guizhou        104.7256       27.1225          132       139     2012      04        20        111              0.192708      13.895660       5.540396       0.279916       0.108500   -9999.000000       0.079600   -9999.000000
56598     56598     guizhou        104.7256       27.1225          132       139     2012      04        21        112              0.180957      16.863861       5.709961       0.283643       0.098000       0.075800       0.078000       0.607000
56598     56598     guizhou        104.7256       27.1225          132       139     2012      04        22        113              0.167042      18.870392       0.237956       0.284593   -9999.000000   -9999.000000   -9999.000000   -9999.000000
56598     56598     guizhou        104.7256       27.1225          132       139     2012      04        23        114              0.153667      20.764526       0.000000       0.270656       0.097000       0.224600   -9999.000000       0.124000
56598     56598     guizhou        104.7256       27.1225          132       139     2012      04        24        115              0.144542      22.667603       0.000000       0.255722       0.113000       0.106900   -9999.000000       0.369000
56598     56598     guizhou        104.7256       27.1225          132       139     2012      04        25        116              0.000000      21.335663       0.000000       0.249089       0.115000   -9999.000000       0.103000   -9999.000000
56598     56598     guizhou        104.7256       27.1225          132       139     2012      04        26        117              0.140458      14.768677       0.317818       0.250898       0.096000       0.168100       0.092200       0.218000
56598     56598     guizhou        104.7256       27.1225          132       139     2012      04        27        118              0.136043      19.866913       0.244995       0.245995   -9999.000000   -9999.000000       0.082500   -9999.000000
56598     56598     guizhou        104.7256       27.1225          132       139     2012      04        28        119              0.131958      21.258636       0.147852       0.241549   -9999.000000       0.087300   -9999.000000       0.169000
56598     56598     guizhou        104.7256       27.1225          132       139     2012      04        29        120              0.132087      20.826263       7.562085       0.238754       0.100000       0.152300   -9999.000000       0.325000
56598     56598     guizhou        104.7256       27.1225          132       139     2012      04        30        121              0.130458      21.211914       0.000000       0.260649       0.100500   -9999.000000   -9999.000000   -9999.000000
56598     56598     guizhou        104.7256       27.1225          132       139     2012      05        01        122              0.123125      23.922119       0.000000       0.251670       0.128500       0.016000       0.099400       0.018000
56598     56598     guizhou        104.7256       27.1225          132       139     2012      05        02        123              0.119417      19.218658       0.000000       0.245721   -9999.000000   -9999.000000       0.102600   -9999.000000
56598     56598     guizhou        104.7256       27.1225          132       139     2012      05        03        124              0.116208      20.682190       0.070261       0.241130   -9999.000000       0.211900       0.086500       0.145000
56598     56598     guizhou        104.7256       27.1225          132       139     2012      05        04        125              0.113375      21.995789       0.000000       0.234878       0.141500   -9999.000000   -9999.000000       0.387000
56598     56598     guizhou        104.7256       27.1225          132       139     2012      05        05        126              0.110955      20.946320       1.710960       0.233353       0.132000   -9999.000000   -9999.000000       0.636000
56598     56598     guizhou        104.7256       27.1225          132       139     2012      05        06        127              0.109917      22.585327       0.832816       0.237177       0.126500       0.180300       0.101800       0.536000
56598     56598     guizhou        104.7256       27.1225          132       139     2012      05        07        128              0.108609      22.833588       0.000000       0.237438   -9999.000000       0.030500       0.080000   -9999.000000
56598     56598     guizhou        104.7256       27.1225          132       139     2012      05        08        129              0.115375      23.895264      10.611515       0.228809   -9999.000000   -9999.000000       0.087500       0.966000
56598     56598     guizhou        104.7256       27.1225          132       139     2012      05        09        130              0.122375      20.858368       6.013309       0.271947   -9999.000000       0.184500   -9999.000000   -9999.000000
56598     56598     guizhou        104.7256       27.1225          132       139     2012      05        10        131              0.117417      22.496338       3.642711       0.263734       0.138000   -9999.000000   -9999.000000       0.518000
56598     56598     guizhou        104.7256       27.1225          132       139     2012      05        11        132              0.122625      23.595551       7.119021       0.275831       0.130000       0.192500   -9999.000000       0.495000
56598     56598     guizhou        104.7256       27.1225          132       139     2012      05        12        133              0.122667      23.442322       0.353780       0.276250       0.165000       0.332100       0.097300   -9999.000000
56598     56598     guizhou        104.7256       27.1225          132       139     2012      05        13        134              0.150000      18.406677       2.912090       0.271143   -9999.000000   -9999.000000       0.098900       0.642000
56598     56598     guizhou        104.7256       27.1225          132       139     2012      05        14        135              0.191625      20.427277       0.209223       0.265845       0.166000       0.284900       0.106200   -9999.000000
56598     56598     guizhou        104.7256       27.1225          132       139     2012      05        15        136              0.175250      16.529663       0.393952       0.261956       0.155500   -9999.000000   -9999.000000       0.200000
56598     56598     guizhou        104.7256       27.1225          132       139     2012      05        16        137              0.165208      17.352936       0.000000       0.254995       0.138500       0.065100   -9999.000000       0.258000
56598     56598     guizhou        104.7256       27.1225          132       139     2012      05        17        138              0.156917      16.477020       0.000000       0.253543       0.143500       0.139200   -9999.000000   -9999.000000
56598     56598     guizhou        104.7256       27.1225          132       139     2012      05        18        139              0.147667      20.884735       5.684744       0.247650   -9999.000000   -9999.000000       0.107100       0.509000
56598     56598     guizhou        104.7256       27.1225          132       139     2012      05        19        140              0.139792      23.005737       1.390675       0.258626   -9999.000000       0.206000       0.107900   -9999.000000
56598     56598     guizhou        104.7256       27.1225          132       139     2012      05        20        141              0.131875      24.700684       0.462889       0.255139       0.142000   -9999.000000       0.090900       0.529000
56598     56598     guizhou        104.7256       27.1225          132       139     2012      05        21        142              0.123708      25.086365       8.710744       0.247566       0.204000       0.177300   -9999.000000   -9999.000000
56598     56598     guizhou        104.7256       27.1225          132       139     2012      05        22        143              0.117667      23.087585       0.780548       0.267523       0.183500       0.575000   -9999.000000       0.836000
56598     56598     guizhou        104.7256       27.1225          132       139     2012      05        23        144              0.124625      17.382385       2.545864       0.263797   -9999.000000   -9999.000000       0.081100       0.761000
56598     56598     guizhou        104.7256       27.1225          132       139     2012      05        24        145              0.142174      16.638092       0.593256       0.264191   -9999.000000       0.322000       0.076800   -9999.000000
56598     56598     guizhou        104.7256       27.1225          132       139     2012      05        25        146              0.000000      16.148865       0.356915       0.264568       0.191000   -9999.000000       0.073200       0.871000
56598     56598     guizhou        104.7256       27.1225          132       139     2012      05        26        147              0.133130      15.446533       2.075398       0.260370       0.168500   -9999.000000   -9999.000000   -9999.000000
56598     56598     guizhou        104.7256       27.1225          132       139     2012      05        27        148              0.131174      18.374847       2.294312       0.265842       0.163500       0.249300   -9999.000000       0.859000
56598     56598     guizhou        104.7256       27.1225          132       139     2012      05        28        149              0.146130      18.161255      15.501517       0.264844       0.152000   -9999.000000   -9999.000000       1.000000
56598     56598     guizhou        104.7256       27.1225          132       139     2012      05        29        150              0.185542      21.228638      10.008934       0.288036   -9999.000000       0.231800       0.071200   -9999.000000
56598     56598     guizhou        104.7256       27.1225          132       139     2012      05        30        151              0.171083      17.358978       0.504780       0.306031   -9999.000000       0.059200       0.066300   -9999.000000
56598     56598     guizhou        104.7256       27.1225          132       139     2012      05        31        152              0.178500      18.625580      10.498789       0.281299       0.184000   -9999.000000       0.066800   -9999.000000
56598     56598     guizhou        104.7256       27.1225          132       139     2012      06        01        153              0.228333      18.660492       6.623775       0.289542       0.180000       0.272700   -9999.000000       0.985000
56598     56598     guizhou        104.7256       27.1225          132       139     2012      06        02        154              0.215958      16.292145       0.363234       0.303171       0.177000   -9999.000000   -9999.000000       0.891000
56598     56598     guizhou        104.7256       27.1225          132       139     2012      06        03        155              0.220750      18.220459       5.563752       0.285926   -9999.000000       0.165600   -9999.000000       0.866000
56598     56598     guizhou        104.7256       27.1225          132       139     2012      06        04        156              0.229625      16.044586       0.340391       0.289612       0.188000       0.178100       0.043500       0.942000
56598     56598     guizhou        104.7256       27.1225          132       139     2012      06        05        157              0.223167      16.826721       0.257789       0.284740       0.180500   -9999.000000       0.042900   -9999.000000
56598     56598     guizhou        104.7256       27.1225          132       139     2012      06        06        158              0.226333      19.897430      14.833759       0.275267       0.176000       0.231500       0.041500       0.977000
56598     56598     guizhou        104.7256       27.1225          132       139     2012      06        07        159              0.241333      17.977753       1.201890       0.290405       0.170500   -9999.000000   -9999.000000   -9999.000000
56598     56598     guizhou        104.7256       27.1225          132       139     2012      06        08        160              0.228500      18.561249       2.016879       0.293979   -9999.000000       0.189600   -9999.000000       0.764000
56598     56598     guizhou        104.7256       27.1225          132       139     2012      06        09        161              0.226167      19.113800       3.468255       0.285444   -9999.000000       0.401800       0.042600       0.936000
56598     56598     guizhou        104.7256       27.1225          132       139     2012      06        10        162              0.227542      19.075195       4.118265       0.285698       0.162000   -9999.000000       0.041400   -9999.000000
56598     56598     guizhou        104.7256       27.1225          132       139     2012      06        11        163              0.000000      18.715759       4.279999       0.285515       0.166000       0.204200       0.040800       0.663000
56598     56598     guizhou        104.7256       27.1225          132       139     2012      06        12        164              0.240417      19.547638       2.174256       0.287480       0.179000   -9999.000000   -9999.000000   -9999.000000
56598     56598     guizhou        104.7256       27.1225          132       139     2012      06        13        165              0.239250      18.310516       3.057100       0.289298   -9999.000000   -9999.000000   -9999.000000       0.736000
56598     56598     guizhou        104.7256       27.1225          132       139     2012      06        14        166              0.231417      19.194427       0.580401       0.286132   -9999.000000       0.145900   -9999.000000       0.887000
56598     56598     guizhou        104.7256       27.1225          132       139     2012      06        15        167              0.218958      18.265381       0.000000       0.280461       0.153000   -9999.000000       0.036700   -9999.000000
56598     56598     guizhou        104.7256       27.1225          132       139     2012      06        16        168              0.205333      19.401245       0.640473       0.272090       0.164500       0.160300       0.038500       0.686000
56598     56598     guizhou        104.7256       27.1225          132       139     2012      06        17        169              0.214167      19.613037       6.133665       0.269347       0.180000       0.241900       0.038300   -9999.000000
56598     56598     guizhou        104.7256       27.1225          132       139     2012      06        18        170              0.247958      19.504913      16.806120       0.277812       0.191000   -9999.000000   -9999.000000       0.933000
56598     56598     guizhou        104.7256       27.1225          132       139     2012      06        19        171              0.259476      18.270569       1.863950       0.295072   -9999.000000       0.137600   -9999.000000   -9999.000000
56598     56598     guizhou        104.7256       27.1225          132       139     2012      06        20        172              0.240000      18.071716       0.811260       0.304069   -9999.000000   -9999.000000       0.054600       0.758000
56598     56598     guizhou        104.7256       27.1225          132       139     2012      06        21        173              0.271500      21.326569      24.403618       0.284888   -9999.000000   -9999.000000       0.060300       1.000000
56598     56598     guizhou        104.7256       27.1225          132       139     2012      06        22        174              0.267375      19.021790       4.945299       0.316049       0.149000       0.203600       0.051100   -9999.000000
56598     56598     guizhou        104.7256       27.1225          132       139     2012      06        23        175              0.243083      18.946594       1.181604       0.311016       0.121000   -9999.000000       0.044200       0.694000
56598     56598     guizhou        104.7256       27.1225          132       139     2012      06        24        176              0.254208      21.783539      11.726242       0.290857   -9999.000000       0.484100   -9999.000000   -9999.000000
56598     56598     guizhou        104.7256       27.1225          132       139     2012      06        25        177              0.247667      21.056549       0.476591       0.307988   -9999.000000   -9999.000000   -9999.000000       0.807000
56598     56598     guizhou        104.7256       27.1225          132       139     2012      06        26        178              0.238750      22.125244       4.830163       0.291134       0.153000       0.102900       0.035700       0.897000
56598     56598     guizhou        104.7256       27.1225          132       139     2012      06        27        179              0.244417      20.835571       2.578838       0.289815       0.152500       0.376800       0.036800   -9999.000000
56598     56598     guizhou        104.7256       27.1225          132       139     2012      06        28        180              0.258667      21.036774      16.008310       0.295518       0.140000   -9999.000000       0.031400       0.933000
56598     56598     guizhou        104.7256       27.1225          132       139     2012      06        29        181              0.275667      21.634857      15.976477       0.313445   -9999.000000       0.404400   -9999.000000   -9999.000000
56598     56598     guizhou        104.7256       27.1225          132       139     2012      06        30        182              0.272250      22.958862       7.227852       0.316340   -9999.000000   -9999.000000   -9999.000000   -9999.000000
56598     56598     guizhou        104.7256       27.1225          132       139     2012      07        01        183              0.257750      22.812958       0.220632       0.308133       0.127000       0.279900   -9999.000000       0.909000
56598     56598     guizhou        104.7256       27.1225          132       139     2012      07        02        184              0.227792      23.369781       0.000000       0.293976       0.128000       0.108300       0.082300       0.546000
56598     56598     guizhou        104.7256       27.1225          132       139     2012      07        03        185              0.204583      24.451660       0.390569       0.282438       0.135000   -9999.000000       0.084700       0.795000
56598     56598     guizhou        104.7256       27.1225          132       139     2012      07        04        186              0.236542      24.479858       9.005299       0.278159   -9999.000000       0.201300       0.082300   -9999.000000
56598     56598     guizhou        104.7256       27.1225          132       139     2012      07        05        187              0.256667      21.948151      13.103579       0.297732   -9999.000000       0.287600   -9999.000000       0.880000
56598     56598     guizhou        104.7256       27.1225          132       139     2012      07        06        188              0.233958      22.280853       0.000000       0.310068   -9999.000000   -9999.000000   -9999.000000   -9999.000000
56598     56598     guizhou        104.7256       27.1225          132       139     2012      07        07        189              0.207125      24.501373       0.118800       0.286569   -9999.000000       0.200000       0.081800       0.626000
56598     56598     guizhou        104.7256       27.1225          132       139     2012      07        08        190              0.184375      25.066010       0.000000       0.279428       0.127000   -9999.000000       0.080200       0.664000
56598     56598     guizhou        104.7256       27.1225          132       139     2012      07        09        191              0.167333      25.950897       1.215462       0.272981       0.118000       0.084700       0.106300   -9999.000000
56598     56598     guizhou        104.7256       27.1225          132       139     2012      07        10        192              0.230826      25.832611       7.733977       0.269233   -9999.000000       0.057200   -9999.000000       0.801000
56598     56598     guizhou        104.7256       27.1225          132       139     2012      07        11        193              0.276375      25.089844      28.029451       0.284638   -9999.000000   -9999.000000   -9999.000000   -9999.000000
56598     56598     guizhou        104.7256       27.1225          132       139     2012      07        12        194              0.292375      24.001556      37.744869       0.317582   -9999.000000       0.287200   -9999.000000       0.926000
56598     56598     guizhou        104.7256       27.1225          132       139     2012      07        13        195              0.270083      21.232819       2.146125       0.339211       0.267500   -9999.000000       0.108900       0.901000
56598     56598     guizhou        104.7256       27.1225          132       139     2012      07        14        196              0.237292      21.937408       0.000000       0.314414       0.255500       0.116700       0.108500   -9999.000000
56598     56598     guizhou        104.7256       27.1225          132       139     2012      07        15        197              0.248375      23.845398      11.993813       0.297008   -9999.000000       0.451700       0.099900       1.000000
56598     56598     guizhou        104.7256       27.1225          132       139     2012      07        16        198              0.277792      22.762726      29.822042       0.309138   -9999.000000   -9999.000000   -9999.000000   -9999.000000
56598     56598     guizhou        104.7256       27.1225          132       139     2012      07        17        199              0.270667      21.010895       4.323167       0.337544       0.334500       0.395200   -9999.000000       0.857000
56598     56598     guizhou        104.7256       27.1225          132       139     2012      07        18        200              0.284750      20.609833       9.089354       0.317008       0.331000   -9999.000000   -9999.000000   -9999.000000
56598     56598     guizhou        104.7256       27.1225          132       139     2012      07        19        201              0.268750      21.157166       5.071187       0.316569       0.276000       0.236400       0.098800       0.896000
56598     56598     guizhou        104.7256       27.1225          132       139     2012      07        20        202              0.247250      22.240051       0.000000       0.313377       0.250000       0.154500       0.095800       0.878000
56598     56598     guizhou        104.7256       27.1225          132       139     2012      07        21        203              0.256417      24.635040       5.495611       0.300232   -9999.000000   -9999.000000       0.085800   -9999.000000
56598     56598     guizhou        104.7256       27.1225          132       139     2012      07        22        204              0.301583      25.257751      59.991867       0.303894       0.300000       0.250300   -9999.000000       0.871000
56598     56598     guizhou        104.7256       27.1225          132       139     2012      07        23        205              0.272500      20.099762       0.133349       0.403583       0.289500       0.133500   -9999.000000   -9999.000000
56598     56598     guizhou        104.7256       27.1225          132       139     2012      07        24        206              0.271167      19.606720      22.576977       0.333949       0.308000   -9999.000000       0.066900       0.864000
56598     56598     guizhou        104.7256       27.1225          132       139     2012      07        25        207              0.297958      19.658844      34.158173       0.326027       0.328000       0.411400       0.068700       1.000000
56598     56598     guizhou        104.7256       27.1225          132       139     2012      07        26        208              0.267250      20.233582       0.109033       0.378854   -9999.000000   -9999.000000       0.061700   -9999.000000
56598     56598     guizhou        104.7256       27.1225          132       139     2012      07        27        209              0.247500      22.474335      11.205869       0.331275   -9999.000000       0.185500   -9999.000000       0.867000
56598     56598     guizhou        104.7256       27.1225          132       139     2012      07        28        210              0.253417      23.501953      12.620779       0.321656       0.275000       0.209200   -9999.000000   -9999.000000
56598     56598     guizhou        104.7256       27.1225          132       139     2012      07        29        211              0.241250      21.275726       0.422916       0.325792       0.254000   -9999.000000   -9999.000000       0.699000
56598     56598     guizhou        104.7256       27.1225          132       139     2012      07        30        212              0.212792      23.239532       0.209091       0.310410       0.239500       0.379200       0.128300       0.794000
56598     56598     guizhou        104.7256       27.1225          132       139     2012      07        31        213              0.228417      24.412079      15.605665       0.304223   -9999.000000   -9999.000000       0.132800       0.900000
56598     56598     guizhou        104.7256       27.1225          132       139     2012      08        01        214              0.239125      22.678864       0.840069       0.319987   -9999.000000       0.114700       0.122900       0.824000
56598     56598     guizhou        104.7256       27.1225          132       139     2012      08        02        215              0.222167      22.090088       2.726582       0.306402       0.274000       0.225400   -9999.000000   -9999.000000
56598     56598     guizhou        104.7256       27.1225          132       139     2012      08        03        216              0.201208      22.685089       0.000000       0.304266       0.278000   -9999.000000   -9999.000000       0.652000
56598     56598     guizhou        104.7256       27.1225          132       139     2012      08        04        217              0.181250      23.780304       1.080213       0.295626       0.269000       0.241400       0.129600   -9999.000000
56598     56598     guizhou        104.7256       27.1225          132       139     2012      08        05        218              0.169417      24.488159       5.944796       0.291990       0.259000   -9999.000000       0.130200       0.562000
56598     56598     guizhou        104.7256       27.1225          132       139     2012      08        06        219              0.205458      24.397156      16.718157       0.293823   -9999.000000       0.380600       0.173300       0.732000
56598     56598     guizhou        104.7256       27.1225          132       139     2012      08        07        220              0.268458      22.109283       4.667394       0.319724   -9999.000000       0.132000       0.148200   -9999.000000
56598     56598     guizhou        104.7256       27.1225          132       139     2012      08        08        221              0.270875      21.919678       5.655728       0.310391       0.258500   -9999.000000   -9999.000000       0.781000
56598     56598     guizhou        104.7256       27.1225          132       139     2012      08        09        222              0.272583      23.381561       2.969753       0.305689       0.259000       0.190400   -9999.000000   -9999.000000
56598     56598     guizhou        104.7256       27.1225          132       139     2012      08        10        223              0.252583      23.038086       0.000000       0.300227       0.249500       0.275300       0.151300       0.500000
56598     56598     guizhou        104.7256       27.1225          132       139     2012      08        11        224              0.224875      23.844635       0.000000       0.290751   -9999.000000   -9999.000000       0.155500       0.651000
56598     56598     guizhou        104.7256       27.1225          132       139     2012      08        12        225              0.199625      25.230713       0.000000       0.285752   -9999.000000       0.068400       0.139600   -9999.000000
56598     56598     guizhou        104.7256       27.1225          132       139     2012      08        13        226              0.180792      25.746582       0.339405       0.282878       0.160000   -9999.000000   -9999.000000       0.641000
56598     56598     guizhou        104.7256       27.1225          132       139     2012      08        14        227              0.166833      25.593872      11.135084       0.281772       0.168500       0.199100   -9999.000000   -9999.000000
56598     56598     guizhou        104.7256       27.1225          132       139     2012      08        15        228              0.161542      25.200958       3.973197       0.300089       0.180000       0.158700   -9999.000000       0.671000
56598     56598     guizhou        104.7256       27.1225          132       139     2012      08        16        229              0.154542      23.992615       0.000000       0.300992       0.149000   -9999.000000       0.163100   -9999.000000
56598     56598     guizhou        104.7256       27.1225          132       139     2012      08        17        230              0.143333      25.096008       0.293446       0.287673   -9999.000000       0.029600       0.165400       0.420000
56598     56598     guizhou        104.7256       27.1225          132       139     2012      08        18        231              0.137667      25.233673       3.165797       0.281551       0.182000   -9999.000000       0.162500       0.530000
56598     56598     guizhou        104.7256       27.1225          132       139     2012      08        19        232              0.135708      22.923187       0.111317       0.288679       0.162000       0.144700   -9999.000000   -9999.000000
56598     56598     guizhou        104.7256       27.1225          132       139     2012      08        20        233              0.131792      23.489655       8.450357       0.283488       0.162000       0.221600   -9999.000000       0.734000
56598     56598     guizhou        104.7256       27.1225          132       139     2012      08        21        234              0.128125      23.666931       0.659865       0.294258       0.212500   -9999.000000       0.133400   -9999.000000
56598     56598     guizhou        104.7256       27.1225          132       139     2012      08        22        235              0.124625      22.584717       2.338159       0.285487   -9999.000000       0.187300       0.130300   -9999.000000
56598     56598     guizhou        104.7256       27.1225          132       139     2012      08        23        236              0.124625      19.690552       0.000000       0.282896   -9999.000000   -9999.000000       0.128700       0.548000
56598     56598     guizhou        104.7256       27.1225          132       139     2012      08        24        237              0.123375      19.695923       0.634133       0.281397       0.238000       0.284500       0.118800   -9999.000000
56598     56598     guizhou        104.7256       27.1225          132       139     2012      08        25        238              0.000000      21.139313       0.402217       0.279119       0.241500       0.043700   -9999.000000       0.389000
56598     56598     guizhou        104.7256       27.1225          132       139     2012      08        26        239              0.146250      21.564667       2.663861       0.279123       0.232000   -9999.000000   -9999.000000   -9999.000000
56598     56598     guizhou        104.7256       27.1225          132       139     2012      08        27        240              0.142625      21.788116       6.075959       0.283949       0.233000       0.177600       0.096000       0.513000
56598     56598     guizhou        104.7256       27.1225          132       139     2012      08        28        241              0.172417      23.586975       8.186763       0.276021   -9999.000000       0.023900       0.098300       0.562000
56598     56598     guizhou        104.7256       27.1225          132       139     2012      08        29        242              0.181667      22.779266       2.411174       0.292476       0.235000   -9999.000000       0.091900       0.629000
56598     56598     guizhou        104.7256       27.1225          132       139     2012      08        30        243              0.208417      23.769714       2.492730       0.288446       0.243000       0.118500   -9999.000000       0.625000
56598     56598     guizhou        104.7256       27.1225          132       139     2012      08        31        244              0.208875      23.992554       0.302458       0.286196       0.238500   -9999.000000   -9999.000000   -9999.000000
56598     56598     guizhou        104.7256       27.1225          132       139     2012      09        01        245              0.241458      24.181763      35.300774       0.280091       0.198000       0.131600   -9999.000000       0.854000
56598     56598     guizhou        104.7256       27.1225          132       139     2012      09        02        246              0.254833      22.757629       0.942015       0.314270   -9999.000000       0.287000       0.097100   -9999.000000
56598     56598     guizhou        104.7256       27.1225          132       139     2012      09        03        247              0.233875      20.234680       0.000000       0.306541   -9999.000000   -9999.000000       0.148100       0.389000
56598     56598     guizhou        104.7256       27.1225          132       139     2012      09        04        248              0.217292      20.894623       0.000000       0.288901       0.200500       0.103600       0.137700       0.409000
56598     56598     guizhou        104.7256       27.1225          132       139     2012      09        05        249              0.200792      20.913666       0.000000       0.282337       0.197000   -9999.000000   -9999.000000   -9999.000000
56598     56598     guizhou        104.7256       27.1225          132       139     2012      09        06        250              0.185583      21.866577       0.000000       0.278288       0.198000       0.088500   -9999.000000       0.523000
56598     56598     guizhou        104.7256       27.1225          132       139     2012      09        07        251              0.170292      23.805573       0.075593       0.273788   -9999.000000       0.170800       0.142100   -9999.000000
56598     56598     guizhou        104.7256       27.1225          132       139     2012      09        08        252              0.191542      23.639374      19.663563       0.271545   -9999.000000   -9999.000000       0.151200       0.655000
56598     56598     guizhou        104.7256       27.1225          132       139     2012      09        09        253              0.227583      24.050140       0.999987       0.294701       0.189000       0.354100       0.150200       0.730000
56598     56598     guizhou        104.7256       27.1225          132       139     2012      09        10        254              0.203417      23.869507       1.661061       0.296363       0.197000   -9999.000000   -9999.000000   -9999.000000
56598     56598     guizhou        104.7256       27.1225          132       139     2012      09        11        255              0.282625      24.595337      30.894619       0.284341       0.173000       0.156800   -9999.000000       1.000000
56598     56598     guizhou        104.7256       27.1225          132       139     2012      09        12        256              0.273708      20.364838      11.756933       0.330208   -9999.000000       0.054700   -9999.000000   -9999.000000
56598     56598     guizhou        104.7256       27.1225          132       139     2012      09        13        257              0.265083      16.978790       0.281950       0.314275   -9999.000000   -9999.000000       0.101300       0.497000
56598     56598     guizhou        104.7256       27.1225          132       139     2012      09        14        258              0.247917      16.417389       3.398845       0.303602       0.140000       0.237500       0.100000   -9999.000000
56598     56598     guizhou        104.7256       27.1225          132       139     2012      09        15        259              0.238083      17.837982       0.462300       0.299015       0.146000       0.048300       0.090200       0.574000
56598     56598     guizhou        104.7256       27.1225          132       139     2012      09        16        260              0.264333      18.588837       5.801686       0.293067       0.183000   -9999.000000   -9999.000000       0.766000
56598     56598     guizhou        104.7256       27.1225          132       139     2012      09        17        261              0.263708      16.553650      10.785468       0.302406       0.180500       0.163400   -9999.000000   -9999.000000
56598     56598     guizhou        104.7256       27.1225          132       139     2012      09        18        262              0.284042      16.160034      10.351993       0.303359   -9999.000000   -9999.000000   -9999.000000       0.773000
56598     56598     guizhou        104.7256       27.1225          132       139     2012      09        19        263              0.268500      15.423950       1.528458       0.318547   -9999.000000       0.147000       0.061800   -9999.000000
56598     56598     guizhou        104.7256       27.1225          132       139     2012      09        20        264              0.268917      17.103607       3.343739       0.303490       0.182500       0.150000       0.067100       0.861000
56598     56598     guizhou        104.7256       27.1225          132       139     2012      09        21        265              0.264833      17.424347       0.194501       0.302450   -9999.000000   -9999.000000       0.057900       0.738000
56598     56598     guizhou        104.7256       27.1225          132       139     2012      09        22        266              0.257000      16.751404       0.509928       0.298250       0.171000       0.239100   -9999.000000   -9999.000000
56598     56598     guizhou        104.7256       27.1225          132       139     2012      09        23        267              0.256167      16.770844       1.254438       0.295285       0.165000   -9999.000000   -9999.000000       0.595000
56598     56598     guizhou        104.7256       27.1225          132       139     2012      09        24        268              0.261083      16.570526       0.487797       0.294838   -9999.000000       0.219900       0.051000   -9999.000000
56598     56598     guizhou        104.7256       27.1225          132       139     2012      09        25        269              0.254333      16.904175       6.184347       0.295295       0.165000       0.309200       0.054300       0.906000
56598     56598     guizhou        104.7256       27.1225          132       139     2012      09        26        270              0.271625      19.036865       2.955216       0.297944       0.171000   -9999.000000       0.050500       0.904000
56598     56598     guizhou        104.7256       27.1225          132       139     2012      09        27        271              0.260571      17.680847       1.398446       0.303222       0.174000       0.262900   -9999.000000       0.706000
56598     56598     guizhou        104.7256       27.1225          132       139     2012      09        28        272              0.262467      16.861023       1.120190       0.296250       0.170000   -9999.000000   -9999.000000       0.796000
56598     56598     guizhou        104.7256       27.1225          132       139     2012      09        29        273              0.255250      16.614716       1.067594       0.296400   -9999.000000       0.162800   -9999.000000   -9999.000000
56598     56598     guizhou        104.7256       27.1225          132       139     2012      09        30        274              0.269833      18.102661       8.131879       0.293427   -9999.000000   -9999.000000       0.047800       0.815000
56598     56598     guizhou        104.7256       27.1225          132       139     2012      10        01        275              0.257667      16.360199       0.966743       0.307090       0.127500   -9999.000000       0.040100   -9999.000000
56598     56598     guizhou        104.7256       27.1225          132       139     2012      10        02        276              0.266792      18.176422      11.591974       0.295557       0.139500       0.187600       0.036200       0.764000
56598     56598     guizhou        104.7256       27.1225          132       139     2012      10        03        277              0.273458      17.990753       4.955292       0.305921       0.136500       0.061100   -9999.000000       0.785000
56598     56598     guizhou        104.7256       27.1225          132       139     2012      10        04        278              0.277458      16.161194       4.427513       0.308600   -9999.000000   -9999.000000   -9999.000000   -9999.000000
56598     56598     guizhou        104.7256       27.1225          132       139     2012      10        05        279              0.267667      14.957031       1.108455       0.307809   -9999.000000       0.278600   -9999.000000       0.807000
56598     56598     guizhou        104.7256       27.1225          132       139     2012      10        06        280              0.264750      14.793579       0.111270       0.299854       0.130000   -9999.000000       0.044300   -9999.000000
56598     56598     guizhou        104.7256       27.1225          132       139     2012      10        07        281              0.264750      14.994476       3.331114       0.295692       0.147000       0.174100       0.044500       0.845000
56598     56598     guizhou        104.7256       27.1225          132       139     2012      10        08        282              0.268333      14.799896       1.905391       0.297850       0.133000       0.156100       0.037600       0.703000
56598     56598     guizhou        104.7256       27.1225          132       139     2012      10        09        283              0.264417      14.439392       0.980525       0.299330       0.145000   -9999.000000   -9999.000000   -9999.000000
56598     56598     guizhou        104.7256       27.1225          132       139     2012      10        10        284              0.264250      13.922150       1.278270       0.297126   -9999.000000       0.263500   -9999.000000       0.911000
56598     56598     guizhou        104.7256       27.1225          132       139     2012      10        11        285              0.271167      13.852661       0.939005       0.295130       0.174000   -9999.000000       0.038100   -9999.000000
56598     56598     guizhou        104.7256       27.1225          132       139     2012      10        12        286              0.272833      13.286377       6.165855       0.295567       0.185500       0.222200       0.039400       0.759000
56598     56598     guizhou        104.7256       27.1225          132       139     2012      10        13        287              0.270583      13.279755       0.945047       0.302701       0.166500       0.215400       0.034800   -9999.000000
56598     56598     guizhou        104.7256       27.1225          132       139     2012      10        14        288              0.266583      14.657257       0.090247       0.298545       0.161500   -9999.000000   -9999.000000       0.697000
56598     56598     guizhou        104.7256       27.1225          132       139     2012      10        15        289              0.256417      17.126587       0.000000       0.292603   -9999.000000       0.296000   -9999.000000       0.810000
56598     56598     guizhou        104.7256       27.1225          132       139     2012      10        16        290              0.249000      19.104279       0.052634       0.288002   -9999.000000   -9999.000000   -9999.000000   -9999.000000
56598     56598     guizhou        104.7256       27.1225          132       139     2012      10        17        291              0.244750      15.472321       0.000000       0.288373       0.165000       0.118000       0.059100       0.342000
56598     56598     guizhou        104.7256       27.1225          132       139     2012      10        18        292              0.239667      14.571777       0.000000       0.287840       0.170500       0.380500       0.061100   -9999.000000
56598     56598     guizhou        104.7256       27.1225          132       139     2012      10        19        293              0.232417      17.864136       0.505257       0.284215       0.151500   -9999.000000       0.056200       0.450000
56598     56598     guizhou        104.7256       27.1225          132       139     2012      10        20        294              0.224333      17.458252       0.000000       0.283912       0.142000       0.374200   -9999.000000       0.619000
56598     56598     guizhou        104.7256       27.1225          132       139     2012      10        21        295              0.215042      18.953430       2.500814       0.281884   -9999.000000       0.114700   -9999.000000   -9999.000000
56598     56598     guizhou        104.7256       27.1225          132       139     2012      10        22        296              0.207417      18.697937       1.003551       0.279415   -9999.000000   -9999.000000       0.084100       0.298000
56598     56598     guizhou        104.7256       27.1225          132       139     2012      10        23        297              0.200333      16.397034       0.212382       0.280678   -9999.000000       0.293200       0.086100   -9999.000000
56598     56598     guizhou        104.7256       27.1225          132       139     2012      10        24        298              0.192167      17.322845       0.000000       0.277545   -9999.000000   -9999.000000       0.085800       0.399000
56598     56598     guizhou        104.7256       27.1225          132       139     2012      10        25        299              0.000000      14.849213       0.000000       0.277830       0.119000       0.219700       0.079400       0.447000
56598     56598     guizhou        104.7256       27.1225          132       139     2012      10        26        300              0.188625      16.688141       0.072536       0.276657   -9999.000000       0.172600   -9999.000000       0.245000
56598     56598     guizhou        104.7256       27.1225          132       139     2012      10        27        301              0.186000      15.836914       0.000000       0.275812   -9999.000000   -9999.000000   -9999.000000       0.472000
56598     56598     guizhou        104.7256       27.1225          132       139     2012      10        28        302              0.000000      15.870056       0.502818       0.275939       0.122000       0.061700       0.083500   -9999.000000
56598     56598     guizhou        104.7256       27.1225          132       139     2012      10        29        303              0.176583      18.333954       0.351286       0.273362       0.133000   -9999.000000       0.112100       0.382000
56598     56598     guizhou        104.7256       27.1225          132       139     2012      10        30        304              0.174833      14.779022       0.929934       0.274414       0.130000       0.145200       0.101600   -9999.000000
56598     56598     guizhou        104.7256       27.1225          132       139     2012      10        31        305              0.172500      11.463409       0.186003       0.276742   -9999.000000       0.165300   -9999.000000       0.210000
56598     56598     guizhou        104.7256       27.1225          132       139     2012      11        01        306              0.169667      13.694519       0.296048       0.272238   -9999.000000   -9999.000000   -9999.000000       0.423000
56598     56598     guizhou        104.7256       27.1225          132       139     2012      11        02        307              0.164958      15.433899       0.071218       0.270810       0.174000       0.229100   -9999.000000   -9999.000000
56598     56598     guizhou        104.7256       27.1225          132       139     2012      11        03        308              0.162125      16.206726       0.186491       0.268725       0.192500   -9999.000000       0.111000       0.342000
56598     56598     guizhou        104.7256       27.1225          132       139     2012      11        04        309              0.169750      13.708862       0.046860       0.269387       0.184000       0.068500       0.112600   -9999.000000
56598     56598     guizhou        104.7256       27.1225          132       139     2012      11        05        310              0.171000      14.104279       0.272581       0.268738       0.166000       0.234300       0.106400       0.339000
56598     56598     guizhou        104.7256       27.1225          132       139     2012      11        06        311              0.178667      11.422455       0.717538       0.269479   -9999.000000   -9999.000000   -9999.000000       0.313000
56598     56598     guizhou        104.7256       27.1225          132       139     2012      11        07        312              0.202750      10.667267       0.398868       0.272051       0.190000       0.202600   -9999.000000   -9999.000000
56598     56598     guizhou        104.7256       27.1225          132       139     2012      11        08        313              0.203250       9.583405       0.000000       0.273458       0.190500       0.283200       0.110900       0.467000
56598     56598     guizhou        104.7256       27.1225          132       139     2012      11        09        314              0.198667      11.419922       0.000000       0.271582       0.178500       0.135200       0.108700   -9999.000000
56598     56598     guizhou        104.7256       27.1225          132       139     2012      11        10        315              0.192000      14.504059       0.349574       0.267760       0.176500       0.205500       0.116700       0.245000
56598     56598     guizhou        104.7256       27.1225          132       139     2012      11        11        316              0.189375      12.382355       0.165515       0.268159   -9999.000000   -9999.000000   -9999.000000   -9999.000000
56598     56598     guizhou        104.7256       27.1225          132       139     2012      11        12        317              0.186917      10.777191       0.000000       0.269831   -9999.000000       0.087000   -9999.000000       0.249000
56598     56598     guizhou        104.7256       27.1225          132       139     2012      11        13        318              0.000000      10.537231       0.000000       0.269254       0.147000       0.042700   -9999.000000       0.445000
56598     56598     guizhou        104.7256       27.1225          132       139     2012      11        14        319              0.178958      14.782501       0.288891       0.266448       0.143500   -9999.000000       0.108600   -9999.000000
56598     56598     guizhou        104.7256       27.1225          132       139     2012      11        15        320              0.175458      14.764282       0.394680       0.265588       0.140500       0.072600       0.117000       0.276000
56598     56598     guizhou        104.7256       27.1225          132       139     2012      11        16        321              0.171958      13.326172       1.078569       0.264895       0.143000   -9999.000000       0.101500   -9999.000000
56598     56598     guizhou        104.7256       27.1225          132       139     2012      11        17        322              0.000000       8.722382       0.184107       0.266269   -9999.000000       0.025800   -9999.000000       0.189000
56598     56598     guizhou        104.7256       27.1225          132       139     2012      11        18        323              0.169167      11.729370       0.000000       0.264978       0.139000       0.073500   -9999.000000       0.349000
56598     56598     guizhou        104.7256       27.1225          132       139     2012      11        19        324              0.166458      12.941864       0.000000       0.263528       0.144000   -9999.000000   -9999.000000   -9999.000000
56598     56598     guizhou        104.7256       27.1225          132       139     2012      11        20        325              0.164833      11.376495       0.000000       0.264782       0.145500       0.089500       0.108800       0.054000
56598     56598     guizhou        104.7256       27.1225          132       139     2012      11        21        326              0.162000      13.281342       0.000000       0.264490       0.121000   -9999.000000       0.111600   -9999.000000
56598     56598     guizhou        104.7256       27.1225          132       139     2012      11        22        327              0.162167      12.037842      51.269817       0.265143   -9999.000000       0.027800       0.105400       0.334000
56598     56598     guizhou        104.7256       27.1225          132       139     2012      11        23        328              0.176458       9.352722       0.796512       0.268188   -9999.000000       0.335800   -9999.000000       0.333000
56598     56598     guizhou        104.7256       27.1225          132       139     2012      11        24        329              0.201083       7.443970       0.000000       0.271230       0.153500   -9999.000000   -9999.000000       0.276000
56598     56598     guizhou        104.7256       27.1225          132       139     2012      11        25        330              0.198625      11.987030       0.209006       0.269455       0.120000       0.220200       0.107100       0.160000
56598     56598     guizhou        104.7256       27.1225          132       139     2012      11        26        331              0.198625       5.940094       0.155701       0.269096       0.132500   -9999.000000   -9999.000000   -9999.000000
56598     56598     guizhou        104.7256       27.1225          132       139     2012      11        27        332              0.197000       5.749786       0.116765       0.269271   -9999.000000   -9999.000000       0.110400       0.218000
56598     56598     guizhou        104.7256       27.1225          132       139     2012      11        28        333              0.195833       6.860657       0.000000       0.268927   -9999.000000       0.184600   -9999.000000   -9999.000000
56598     56598     guizhou        104.7256       27.1225          132       139     2012      11        29        334              0.193000       7.690460       0.057034       0.268519       0.132000   -9999.000000   -9999.000000       0.050000
56598     56598     guizhou        104.7256       27.1225          132       139     2012      11        30        335              0.193000       7.592926       0.000000       0.268569       0.141500       0.083500   -9999.000000       0.185000
56598     56598     guizhou        104.7256       27.1225          132       139     2012      12        01        336              0.196500       7.164215       2.396183       0.268744       0.160000       0.080300       0.118700   -9999.000000
56598     56598     guizhou        104.7256       27.1225          132       139     2012      12        02        337              0.197000       3.980194       0.329361       0.268095       0.147000   -9999.000000       0.126700       0.216000
56598     56598     guizhou        104.7256       27.1225          132       139     2012      12        03        338              0.193000       8.926453       0.316701       0.267732   -9999.000000       0.159000       0.073400   -9999.000000
56598     56598     guizhou        104.7256       27.1225          132       139     2012      12        04        339              0.193000       5.995453       0.552358       0.268823       0.170000   -9999.000000   -9999.000000       0.250000
56598     56598     guizhou        104.7256       27.1225          132       139     2012      12        05        340              0.194000       5.725586       0.251353       0.270822       0.145000       0.138500   -9999.000000       0.121000
56598     56598     guizhou        104.7256       27.1225          132       139     2012      12        06        341              0.193000       5.182220       0.148578       0.270034       0.156000       0.047200       0.082700   -9999.000000
56598     56598     guizhou        104.7256       27.1225          132       139     2012      12        07        342              0.193667       7.768555       0.739232       0.268943       0.154000   -9999.000000       0.084600       0.213000
56598     56598     guizhou        104.7256       27.1225          132       139     2012      12        08        343              0.199958       5.892059       0.816801       0.271580   -9999.000000       0.286100       0.086500   -9999.000000
56598     56598     guizhou        104.7256       27.1225          132       139     2012      12        09        344              0.208250       5.660431       1.350036       0.274363   -9999.000000   -9999.000000       0.076200       0.353000
56598     56598     guizhou        104.7256       27.1225          132       139     2012      12        10        345              0.215167       4.989136       0.170029       0.276707       0.177000       0.089700   -9999.000000   -9999.000000
56598     56598     guizhou        104.7256       27.1225          132       139     2012      12        11        346              0.213917       4.715363       0.345907       0.275916       0.144500       0.249000   -9999.000000       0.254000
56598     56598     guizhou        104.7256       27.1225          132       139     2012      12        12        347              0.221083       7.055756       0.619973       0.274006       0.136500   -9999.000000       0.114900       0.346000
56598     56598     guizhou        104.7256       27.1225          132       139     2012      12        13        348              0.217208       8.168549       0.000000       0.274763       0.124000       0.305900       0.112500   -9999.000000
56598     56598     guizhou        104.7256       27.1225          132       139     2012      12        14        349              0.208417      11.362274       0.094808       0.269846   -9999.000000   -9999.000000       0.105100       0.026000
56598     56598     guizhou        104.7256       27.1225          132       139     2012      12        15        350              0.000000      11.514893       0.000000       0.266416       0.136000       0.233900   -9999.000000   -9999.000000
56598     56598     guizhou        104.7256       27.1225          132       139     2012      12        16        351              0.199000      11.450806       0.230711       0.264803       0.143500       0.190900   -9999.000000       0.014000
56598     56598     guizhou        104.7256       27.1225          132       139     2012      12        17        352              0.193167      12.141327       0.182857       0.263937       0.130500   -9999.000000   -9999.000000       0.032000
56598     56598     guizhou        104.7256       27.1225          132       139     2012      12        18        353              0.192000       6.069214       0.220699       0.266378       0.127000       0.227100       0.063000   -9999.000000
56598     56598     guizhou        104.7256       27.1225          132       139     2012      12        19        354              0.191000       6.665497       0.193321       0.266519   -9999.000000       0.059600       0.066300       0.116000
56598     56598     guizhou        104.7256       27.1225          132       139     2012      12        20        355              0.000000       6.030060       0.189552       0.266492   -9999.000000   -9999.000000       0.057800   -9999.000000
56598     56598     guizhou        104.7256       27.1225          132       139     2012      12        21        356              0.196958       4.349823       0.478568       0.267475       0.161000       0.211700   -9999.000000       0.119000
56598     56598     guizhou        104.7256       27.1225          132       139     2012      12        22        357              0.202542       3.196777       1.390572       0.266727   -9999.000000   -9999.000000   -9999.000000       0.238000
56598     56598     guizhou        104.7256       27.1225          132       139     2012      12        23        358              0.210333       1.940735       1.707138       0.259419   -9999.000000   -9999.000000       0.060000       0.028000
56598     56598     guizhou        104.7256       27.1225          132       139     2012      12        24        359              0.210600       2.628510       1.356717       0.259710   -9999.000000       0.085100       0.101400       0.221000
56598     56598     guizhou        104.7256       27.1225          132       139     2012      12        25        360              0.208833       7.360931       0.112754       0.272788   -9999.000000   -9999.000000       0.103200   -9999.000000
56598     56598     guizhou        104.7256       27.1225          132       139     2012      12        26        361              0.000000       3.236877       0.500985       0.271204   -9999.000000   -9999.000000   -9999.000000       0.109000
56598     56598     guizhou        104.7256       27.1225          132       139     2012      12        27        362              0.213000       2.363800       0.151371       0.266514       0.154000   -9999.000000   -9999.000000   -9999.000000
56598     56598     guizhou        104.7256       27.1225          132       139     2012      12        28        363              0.213000       5.785248       0.095008       0.270724       0.146000   -9999.000000   -9999.000000   -9999.000000
56598     56598     guizhou        104.7256       27.1225          132       139     2012      12        29        364              0.000000       7.379913       0.112498       0.268607   -9999.000000   -9999.000000       0.094400   -9999.000000
56598     56598     guizhou        104.7256       27.1225          132       139     2012      12        30        365              0.000000       0.411469       0.208552       0.205813   -9999.000000   -9999.000000       0.095100   -9999.000000
56598     56598     guizhou        104.7256       27.1225          132       139     2012      12        31        366              0.211667      -0.412567       0.480247       0.154545   -9999.000000   -9999.000000       0.065500   -9999.000000
