# Supplementary material for: Research on Fusing Multisatellite Soil Moisture Data Based on Bayesian Model Averaging
Source: Hindawi journal article supplement (doi:10.1155/2018/9310838), 2018-06-25
Supplement: f1 [file 9310838.f1.zip › 2012_sm00-10cm_daily_ZDB_ZHY_56666_366days_allin.txt]

56666     56666     sichuan        101.7167       26.5833          134       127     2012      01        01        001              0.000000   -9999.000000       0.000000   -9999.000000   -9999.000000       0.013700   -9999.000000   -9999.000000
56666     56666     sichuan        101.7167       26.5833          134       127     2012      01        02        002              0.013875      11.561066       0.000000       0.259392   -9999.000000   -9999.000000       0.121400   -9999.000000
56666     56666     sichuan        101.7167       26.5833          134       127     2012      01        03        003              0.000000      13.783783       0.000000       0.259039       0.286000       0.010900       0.123300       0.290000
56666     56666     sichuan        101.7167       26.5833          134       127     2012      01        04        004              0.017125      15.098083       0.065033       0.257149       0.292000       0.003800       0.127600   -9999.000000
56666     56666     sichuan        101.7167       26.5833          134       127     2012      01        05        005              0.012000      12.253296       0.000000       0.257367       0.278000   -9999.000000   -9999.000000       0.291000
56666     56666     sichuan        101.7167       26.5833          134       127     2012      01        06        006              0.011958      12.647614       0.000000       0.257401       0.271000       0.034500   -9999.000000       0.127000
56666     56666     sichuan        101.7167       26.5833          134       127     2012      01        07        007              0.011583      12.399506       3.645022       0.255938   -9999.000000   -9999.000000   -9999.000000       0.001000
56666     56666     sichuan        101.7167       26.5833          134       127     2012      01        08        008              0.000000      11.931732       0.000000       0.257389       0.295000   -9999.000000       0.121100       0.180000
56666     56666     sichuan        101.7167       26.5833          134       127     2012      01        09        009              0.011833      12.373688       0.384024       0.255909       0.283500       0.123500       0.125500   -9999.000000
56666     56666     sichuan        101.7167       26.5833          134       127     2012      01        10        010              0.025583      12.964478       0.000000       0.255156       0.284000   -9999.000000   -9999.000000       0.013000
56666     56666     sichuan        101.7167       26.5833          134       127     2012      01        11        011              0.012000      14.583435       0.000000       0.255059       0.259000       0.009700   -9999.000000   -9999.000000
56666     56666     sichuan        101.7167       26.5833          134       127     2012      01        12        012              0.012000      13.349762       0.000000       0.254594   -9999.000000       0.154800   -9999.000000       0.006000
56666     56666     sichuan        101.7167       26.5833          134       127     2012      01        13        013              0.011208      13.696442       0.138450       0.253114   -9999.000000   -9999.000000   -9999.000000       0.181000
56666     56666     sichuan        101.7167       26.5833          134       127     2012      01        14        014              0.011417      12.897858       0.000000       0.252801       0.265500       0.018100       0.128600   -9999.000000
56666     56666     sichuan        101.7167       26.5833          134       127     2012      01        15        015              0.010083      12.897827       0.000000       0.252350       0.266500   -9999.000000       0.128900       0.071000
56666     56666     sichuan        101.7167       26.5833          134       127     2012      01        16        016              0.010375      12.366364       0.000000       0.250358       0.268000   -9999.000000       0.123400   -9999.000000
56666     56666     sichuan        101.7167       26.5833          134       127     2012      01        17        017              0.000000      11.897797       0.189554       0.248867   -9999.000000       0.023600   -9999.000000       0.034000
56666     56666     sichuan        101.7167       26.5833          134       127     2012      01        18        018              0.010208      11.914978       0.089761       0.249597   -9999.000000   -9999.000000   -9999.000000       0.138000
56666     56666     sichuan        101.7167       26.5833          134       127     2012      01        19        019              0.011458      12.481049       0.000000       0.248588       0.273500       0.011300       0.126500   -9999.000000
56666     56666     sichuan        101.7167       26.5833          134       127     2012      01        20        020              0.010958      13.060944       0.000000       0.246406       0.273500   -9999.000000       0.132300       0.130000
56666     56666     sichuan        101.7167       26.5833          134       127     2012      01        21        021              0.009333      13.710114       0.232486       0.244388       0.266500       0.063800       0.124100   -9999.000000
56666     56666     sichuan        101.7167       26.5833          134       127     2012      01        22        022              0.023667      12.716675       0.000000       0.244678   -9999.000000   -9999.000000   -9999.000000       0.016000
56666     56666     sichuan        101.7167       26.5833          134       127     2012      01        23        023              0.021750      12.815033       2.649450       0.243282   -9999.000000   -9999.000000   -9999.000000       0.298000
56666     56666     sichuan        101.7167       26.5833          134       127     2012      01        24        024              0.010042      13.004639       0.000000       0.241765       0.282000       0.132600   -9999.000000       0.328000
56666     56666     sichuan        101.7167       26.5833          134       127     2012      01        25        025              0.009792      13.327942       0.000000       0.239302       0.287500   -9999.000000       0.125700       0.179000
56666     56666     sichuan        101.7167       26.5833          134       127     2012      01        26        026              0.009917      13.014496       0.000000       0.237590       0.279500   -9999.000000       0.127200   -9999.000000
56666     56666     sichuan        101.7167       26.5833          134       127     2012      01        27        027              0.010208      13.657135       0.000000       0.236296       0.273000       0.049400       0.120700       0.412000
56666     56666     sichuan        101.7167       26.5833          134       127     2012      01        28        028              0.037167      14.791779       0.000000       0.233613   -9999.000000   -9999.000000   -9999.000000   -9999.000000
56666     56666     sichuan        101.7167       26.5833          134       127     2012      01        29        029              0.009125      14.638031       0.000000       0.230568       0.287000   -9999.000000   -9999.000000       0.063000
56666     56666     sichuan        101.7167       26.5833          134       127     2012      01        30        030              0.019458      14.575684       0.000000       0.228275       0.276500       0.056000   -9999.000000       0.121000
56666     56666     sichuan        101.7167       26.5833          134       127     2012      01        31        031              0.009208      15.095856       8.856852       0.225774       0.280000   -9999.000000       0.144300   -9999.000000
56666     56666     sichuan        101.7167       26.5833          134       127     2012      02        01        032              0.019458      15.207916       0.000000       0.223391       0.229500       0.048600       0.145500       0.363000
56666     56666     sichuan        101.7167       26.5833          134       127     2012      02        02        033              0.008875      15.404755       0.000000       0.221076   -9999.000000   -9999.000000       0.136800   -9999.000000
56666     56666     sichuan        101.7167       26.5833          134       127     2012      02        03        034              0.008750      15.073944       0.000000       0.218745   -9999.000000   -9999.000000   -9999.000000       0.072000
56666     56666     sichuan        101.7167       26.5833          134       127     2012      02        04        035              0.008333      14.889099       0.000000       0.217242       0.214500       0.062900   -9999.000000       0.087000
56666     56666     sichuan        101.7167       26.5833          134       127     2012      02        05        036              0.035417      15.278595       0.000000       0.215047       0.240500   -9999.000000       0.142300       0.099000
56666     56666     sichuan        101.7167       26.5833          134       127     2012      02        06        037              0.008833      15.976227       0.000000       0.211943       0.234000   -9999.000000       0.118700       0.376000
56666     56666     sichuan        101.7167       26.5833          134       127     2012      02        07        038              0.014708      16.733521       0.000000       0.207909   -9999.000000   -9999.000000       0.111900   -9999.000000
56666     56666     sichuan        101.7167       26.5833          134       127     2012      02        08        039              0.009167      16.361481       0.000000       0.205302   -9999.000000   -9999.000000   -9999.000000       0.075000
56666     56666     sichuan        101.7167       26.5833          134       127     2012      02        09        040              0.008875      17.465424       0.000000       0.202010       0.229000   -9999.000000   -9999.000000   -9999.000000
56666     56666     sichuan        101.7167       26.5833          134       127     2012      02        10        041              0.008208      18.064362       0.000000       0.196497       0.230000   -9999.000000   -9999.000000       0.193000
56666     56666     sichuan        101.7167       26.5833          134       127     2012      02        11        042              0.039958      16.825134       0.000000       0.195220       0.228000       0.231300       0.115900       0.461000
56666     56666     sichuan        101.7167       26.5833          134       127     2012      02        12        043              0.028125      17.301880       0.000000       0.192461   -9999.000000   -9999.000000       0.114900   -9999.000000
56666     56666     sichuan        101.7167       26.5833          134       127     2012      02        13        044              0.008813      16.708679       0.000000       0.190195   -9999.000000   -9999.000000       0.112200       0.171000
56666     56666     sichuan        101.7167       26.5833          134       127     2012      02        14        045              0.008375      17.232819       0.000000       0.187156       0.246000       0.021400   -9999.000000   -9999.000000
56666     56666     sichuan        101.7167       26.5833          134       127     2012      02        15        046              0.008208      17.709900       0.000000       0.183208       0.250000   -9999.000000   -9999.000000       0.197000
56666     56666     sichuan        101.7167       26.5833          134       127     2012      02        16        047              0.009083      18.458496       0.000000       0.179101       0.240500       0.020900   -9999.000000       0.224000
56666     56666     sichuan        101.7167       26.5833          134       127     2012      02        17        048              0.009750      19.237732       0.000000       0.174604       0.232000   -9999.000000       0.117200   -9999.000000
56666     56666     sichuan        101.7167       26.5833          134       127     2012      02        18        049              0.025750      20.026825       0.000000       0.170101   -9999.000000   -9999.000000       0.122000       0.094000
56666     56666     sichuan        101.7167       26.5833          134       127     2012      02        19        050              0.008083      19.216370       0.069872       0.166690   -9999.000000   -9999.000000       0.109700   -9999.000000
56666     56666     sichuan        101.7167       26.5833          134       127     2012      02        20        051              0.008042      18.899506       0.000000       0.164012       0.229000   -9999.000000   -9999.000000       0.149000
56666     56666     sichuan        101.7167       26.5833          134       127     2012      02        21        052              0.008250      19.433563       0.092685       0.160568       0.219500       0.016300   -9999.000000       0.255000
56666     56666     sichuan        101.7167       26.5833          134       127     2012      02        22        053              0.007652      18.674469       0.000000       0.159780       0.212000       0.074800       0.125000       0.253000
56666     56666     sichuan        101.7167       26.5833          134       127     2012      02        23        054              0.016478      19.359467       0.000000       0.157860   -9999.000000   -9999.000000       0.126900       0.034000
56666     56666     sichuan        101.7167       26.5833          134       127     2012      02        24        055              0.008083      20.260651       0.000000       0.155323   -9999.000000       0.026600       0.117900   -9999.000000
56666     56666     sichuan        101.7167       26.5833          134       127     2012      02        25        056              0.008000      21.063110       0.000000       0.152489       0.205000   -9999.000000   -9999.000000       0.062000
56666     56666     sichuan        101.7167       26.5833          134       127     2012      02        26        057              0.007458      21.506317       0.000000       0.148821       0.221000       0.076400   -9999.000000   -9999.000000
56666     56666     sichuan        101.7167       26.5833          134       127     2012      02        27        058              0.008333      21.843903       0.000000       0.144881       0.207500   -9999.000000   -9999.000000       0.240000
56666     56666     sichuan        101.7167       26.5833          134       127     2012      02        28        059              0.007217      20.295410       0.000000       0.142760   -9999.000000   -9999.000000   -9999.000000       0.094000
56666     56666     sichuan        101.7167       26.5833          134       127     2012      02        29        060              0.000000   -9999.000000       0.426827   -9999.000000   -9999.000000   -9999.000000   -9999.000000   -9999.000000
56666     56666     sichuan        101.7167       26.5833          134       127     2012      03        01        061              0.006409      21.291840       0.000000       0.140699       0.201000   -9999.000000       0.102900       0.305000
56666     56666     sichuan        101.7167       26.5833          134       127     2012      03        02        062              0.006333      19.446075       1.633907       0.140491       0.216000   -9999.000000   -9999.000000   -9999.000000
56666     56666     sichuan        101.7167       26.5833          134       127     2012      03        03        063              0.006542      18.304932       0.165107       0.142167       0.214000       0.027600   -9999.000000       0.184000
56666     56666     sichuan        101.7167       26.5833          134       127     2012      03        04        064              0.006792      17.120667       0.000000       0.148523       0.210000   -9999.000000       0.110400       0.166000
56666     56666     sichuan        101.7167       26.5833          134       127     2012      03        05        065              0.043333      17.991882       0.000000       0.146608   -9999.000000   -9999.000000       0.118500   -9999.000000
56666     56666     sichuan        101.7167       26.5833          134       127     2012      03        06        066              0.024565      19.258331       0.000000       0.143326       0.209000   -9999.000000       0.119700       0.199000
56666     56666     sichuan        101.7167       26.5833          134       127     2012      03        07        067              0.000000      20.591278       0.000000       0.140842       0.220000   -9999.000000       0.111300   -9999.000000
56666     56666     sichuan        101.7167       26.5833          134       127     2012      03        08        068              0.006833      19.681702       0.000000       0.140341       0.205500       0.082300   -9999.000000       0.076000
56666     56666     sichuan        101.7167       26.5833          134       127     2012      03        09        069              0.007348      20.376190       0.000000       0.139533       0.206000   -9999.000000   -9999.000000   -9999.000000
56666     56666     sichuan        101.7167       26.5833          134       127     2012      03        10        070              0.007208      22.013916       0.000000       0.137158   -9999.000000   -9999.000000       0.114800       0.001000
56666     56666     sichuan        101.7167       26.5833          134       127     2012      03        11        071              0.007167      22.650391       0.000000       0.134491   -9999.000000   -9999.000000       0.113300       0.143000
56666     56666     sichuan        101.7167       26.5833          134       127     2012      03        12        072              0.010000      23.304718       0.000000       0.132026       0.172000   -9999.000000       0.091300   -9999.000000
56666     56666     sichuan        101.7167       26.5833          134       127     2012      03        13        073              0.026542      23.659729       0.000000       0.129831       0.182500       0.027800   -9999.000000       0.013000
56666     56666     sichuan        101.7167       26.5833          134       127     2012      03        14        074              0.006708      24.274261       0.090082       0.128320       0.184000   -9999.000000   -9999.000000   -9999.000000
56666     56666     sichuan        101.7167       26.5833          134       127     2012      03        15        075              0.006625      23.905975       0.000000       0.128336   -9999.000000       0.025400   -9999.000000       0.210000
56666     56666     sichuan        101.7167       26.5833          134       127     2012      03        16        076              0.005000      23.931854       0.000000       0.126750   -9999.000000       0.145000       0.097700       0.171000
56666     56666     sichuan        101.7167       26.5833          134       127     2012      03        17        077              0.000000      23.436646       0.000000       0.125834       0.176000   -9999.000000       0.100800   -9999.000000
56666     56666     sichuan        101.7167       26.5833          134       127     2012      03        18        078              0.000000      23.250031       0.000000       0.125189       0.182500       0.126800       0.093200       0.047000
56666     56666     sichuan        101.7167       26.5833          134       127     2012      03        19        079              0.000000      23.824921       0.000000       0.124302       0.183000   -9999.000000   -9999.000000   -9999.000000
56666     56666     sichuan        101.7167       26.5833          134       127     2012      03        20        080              0.000000      24.647003       0.000000       0.123166   -9999.000000   -9999.000000   -9999.000000       0.034000
56666     56666     sichuan        101.7167       26.5833          134       127     2012      03        21        081              0.000000      25.479919       0.000000       0.122359   -9999.000000   -9999.000000       0.134400       0.206000
56666     56666     sichuan        101.7167       26.5833          134       127     2012      03        22        082              0.000000      26.405273       0.000000       0.121540       0.184000   -9999.000000       0.132400       0.283000
56666     56666     sichuan        101.7167       26.5833          134       127     2012      03        23        083              0.000000      25.276062       0.215303       0.121725       0.208000   -9999.000000       0.138900       0.153000
56666     56666     sichuan        101.7167       26.5833          134       127     2012      03        24        084              0.000000      18.694519       0.000000       0.123243       0.188000   -9999.000000       0.131400   -9999.000000
56666     56666     sichuan        101.7167       26.5833          134       127     2012      03        25        085              0.000000      20.813354       0.000000       0.123530       0.165000   -9999.000000   -9999.000000       0.149000
56666     56666     sichuan        101.7167       26.5833          134       127     2012      03        26        086              0.006000      23.291718       0.169060       0.122933   -9999.000000       0.104900   -9999.000000   -9999.000000
56666     56666     sichuan        101.7167       26.5833          134       127     2012      03        27        087              0.006778      25.543030       2.041947       0.121699       0.202000   -9999.000000       0.090500       0.391000
56666     56666     sichuan        101.7167       26.5833          134       127     2012      03        28        088              0.007190      25.166168       0.131558       0.137589       0.184000   -9999.000000       0.090000       0.207000
56666     56666     sichuan        101.7167       26.5833          134       127     2012      03        29        089              0.006957      25.349426       0.316537       0.139149       0.178000       0.041800       0.080700   -9999.000000
56666     56666     sichuan        101.7167       26.5833          134       127     2012      03        30        090              0.006458      26.078827       0.500922       0.129038       0.171500   -9999.000000   -9999.000000       0.161000
56666     56666     sichuan        101.7167       26.5833          134       127     2012      03        31        091              0.005500      25.533875       0.870204       0.122568   -9999.000000       0.068300   -9999.000000   -9999.000000
56666     56666     sichuan        101.7167       26.5833          134       127     2012      04        01        092              0.006375      20.462830       1.715792       0.121868   -9999.000000   -9999.000000   -9999.000000       0.046000
56666     56666     sichuan        101.7167       26.5833          134       127     2012      04        02        093              0.006875      24.101898       0.000000       0.120841       0.153000   -9999.000000       0.082400       0.026000
56666     56666     sichuan        101.7167       26.5833          134       127     2012      04        03        094              0.006625      26.774414       0.949850       0.118750       0.168000       0.051300       0.084900       0.077000
56666     56666     sichuan        101.7167       26.5833          134       127     2012      04        04        095              0.006458      27.245453       0.417189       0.117456       0.165000   -9999.000000       0.078900       0.367000
56666     56666     sichuan        101.7167       26.5833          134       127     2012      04        05        096              0.006292      27.586212       0.000000       0.119216   -9999.000000   -9999.000000   -9999.000000   -9999.000000
56666     56666     sichuan        101.7167       26.5833          134       127     2012      04        06        097              0.006375      26.314545       0.102596       0.119391   -9999.000000   -9999.000000   -9999.000000       0.071000
56666     56666     sichuan        101.7167       26.5833          134       127     2012      04        07        098              0.006333      26.748138       0.070725       0.117613       0.187000   -9999.000000       0.084000   -9999.000000
56666     56666     sichuan        101.7167       26.5833          134       127     2012      04        08        099              0.006000      24.552521       2.727966       0.117813       0.189500   -9999.000000       0.092800       0.222000
56666     56666     sichuan        101.7167       26.5833          134       127     2012      04        09        100              0.008542      21.676392       0.262980       0.140672       0.179500   -9999.000000       0.089400       0.256000
56666     56666     sichuan        101.7167       26.5833          134       127     2012      04        10        101              0.011458      23.322327       0.000000       0.148106       0.145000       0.014000   -9999.000000   -9999.000000
56666     56666     sichuan        101.7167       26.5833          134       127     2012      04        11        102              0.011750      25.688812       4.235681       0.130613   -9999.000000   -9999.000000   -9999.000000       0.005000
56666     56666     sichuan        101.7167       26.5833          134       127     2012      04        12        103              0.010000      27.134003       0.000000       0.121773       0.171000   -9999.000000   -9999.000000   -9999.000000
56666     56666     sichuan        101.7167       26.5833          134       127     2012      04        13        104              0.009125      26.402893       0.000000       0.119021       0.179500       0.023100       0.084100       0.054000
56666     56666     sichuan        101.7167       26.5833          134       127     2012      04        14        105              0.008542      27.191162       0.000000       0.117292       0.165000   -9999.000000       0.083900       0.312000
56666     56666     sichuan        101.7167       26.5833          134       127     2012      04        15        106              0.008000      28.882690       0.000000       0.115433       0.160000   -9999.000000       0.078100   -9999.000000
56666     56666     sichuan        101.7167       26.5833          134       127     2012      04        16        107              0.006833      29.811829       0.000000       0.114233   -9999.000000       0.085700   -9999.000000       0.041000
56666     56666     sichuan        101.7167       26.5833          134       127     2012      04        17        108              0.006625      27.876831       0.000000       0.113891   -9999.000000   -9999.000000   -9999.000000   -9999.000000
56666     56666     sichuan        101.7167       26.5833          134       127     2012      04        18        109              0.006583      28.270935       0.000000       0.113457       0.161500       0.050500   -9999.000000       0.056000
56666     56666     sichuan        101.7167       26.5833          134       127     2012      04        19        110              0.006167      28.400787       0.000000       0.113076       0.172000   -9999.000000       0.106300       0.194000
56666     56666     sichuan        101.7167       26.5833          134       127     2012      04        20        111              0.006542      27.409485       0.000000       0.112786       0.160500   -9999.000000       0.103800       0.289000
56666     56666     sichuan        101.7167       26.5833          134       127     2012      04        21        112              0.006833      28.171967       0.505713       0.112233   -9999.000000       0.011700       0.097900       0.255000
56666     56666     sichuan        101.7167       26.5833          134       127     2012      04        22        113              0.005917      28.873962       0.527100       0.115678   -9999.000000   -9999.000000   -9999.000000   -9999.000000
56666     56666     sichuan        101.7167       26.5833          134       127     2012      04        23        114              0.006625      26.259674       0.000000       0.119032       0.142500       0.103700   -9999.000000       0.123000
56666     56666     sichuan        101.7167       26.5833          134       127     2012      04        24        115              0.006500      29.678192       0.000000       0.113091       0.152000   -9999.000000       0.079000   -9999.000000
56666     56666     sichuan        101.7167       26.5833          134       127     2012      04        25        116              0.000000      29.477325       0.229590       0.110614       0.143000       0.008500       0.082000       0.212000
56666     56666     sichuan        101.7167       26.5833          134       127     2012      04        26        117              0.005708      27.564484       0.409814       0.112013   -9999.000000   -9999.000000       0.082600       0.080000
56666     56666     sichuan        101.7167       26.5833          134       127     2012      04        27        118              0.006042      26.054108       0.000000       0.114472   -9999.000000   -9999.000000   -9999.000000   -9999.000000
56666     56666     sichuan        101.7167       26.5833          134       127     2012      04        28        119              0.006000      27.725281       0.000000       0.111138       0.150000       0.083500   -9999.000000       0.438000
56666     56666     sichuan        101.7167       26.5833          134       127     2012      04        29        120              0.006125      27.670868       0.000000       0.110097       0.152500   -9999.000000   -9999.000000   -9999.000000
56666     56666     sichuan        101.7167       26.5833          134       127     2012      04        30        121              0.006333      28.531921       0.000000       0.109653       0.145500   -9999.000000       0.100400       0.108000
56666     56666     sichuan        101.7167       26.5833          134       127     2012      05        01        122              0.006542      29.883087       0.000000       0.108936       0.145000       0.130500       0.102200       0.163000
56666     56666     sichuan        101.7167       26.5833          134       127     2012      05        02        123              0.006292      30.723175       0.000000       0.108481   -9999.000000   -9999.000000       0.092900       0.225000
56666     56666     sichuan        101.7167       26.5833          134       127     2012      05        03        124              0.005792      30.638031       0.000000       0.107801       0.163000   -9999.000000   -9999.000000       0.413000
56666     56666     sichuan        101.7167       26.5833          134       127     2012      05        04        125              0.005958      30.726593       0.000000       0.107458       0.168500   -9999.000000   -9999.000000   -9999.000000
56666     56666     sichuan        101.7167       26.5833          134       127     2012      05        05        126              0.006042      31.579865       0.000000       0.107163       0.166500   -9999.000000   -9999.000000       0.373000
56666     56666     sichuan        101.7167       26.5833          134       127     2012      05        06        127              0.005333      32.142120       0.840078       0.107023       0.155000       0.096900       0.102300   -9999.000000
56666     56666     sichuan        101.7167       26.5833          134       127     2012      05        07        128              0.006042      30.042969       1.287642       0.107795   -9999.000000   -9999.000000       0.074300       0.023000
56666     56666     sichuan        101.7167       26.5833          134       127     2012      05        08        129              0.006417      30.179077       0.679536       0.108378   -9999.000000       0.078400       0.071300       0.147000
56666     56666     sichuan        101.7167       26.5833          134       127     2012      05        09        130              0.006875      30.593719       0.000000       0.108810   -9999.000000       0.036600   -9999.000000   -9999.000000
56666     56666     sichuan        101.7167       26.5833          134       127     2012      05        10        131              0.006625      32.456726       0.000000       0.107364       0.163500   -9999.000000   -9999.000000       0.299000
56666     56666     sichuan        101.7167       26.5833          134       127     2012      05        11        132              0.006217      33.513824       0.000000       0.106618       0.160500       0.094800       0.074900   -9999.000000
56666     56666     sichuan        101.7167       26.5833          134       127     2012      05        12        133              0.006542      34.359833       0.000000       0.106346   -9999.000000   -9999.000000       0.077100       0.198000
56666     56666     sichuan        101.7167       26.5833          134       127     2012      05        13        134              0.006125      34.458374       0.000000       0.106080   -9999.000000       0.026600       0.073700       0.254000
56666     56666     sichuan        101.7167       26.5833          134       127     2012      05        14        135              0.005417      33.504303       0.266137       0.105928       0.163000       0.055900   -9999.000000   -9999.000000
56666     56666     sichuan        101.7167       26.5833          134       127     2012      05        15        136              0.005958      29.463898       0.000000       0.108108       0.172000   -9999.000000   -9999.000000       0.244000
56666     56666     sichuan        101.7167       26.5833          134       127     2012      05        16        137              0.006125      29.303131       0.000000       0.106654       0.166000       0.070900   -9999.000000   -9999.000000
56666     56666     sichuan        101.7167       26.5833          134       127     2012      05        17        138              0.006167      31.052124       0.000000       0.105781   -9999.000000   -9999.000000       0.075400       0.400000
56666     56666     sichuan        101.7167       26.5833          134       127     2012      05        18        139              0.006125      32.659668       0.000000       0.105311   -9999.000000   -9999.000000       0.075000       0.333000
56666     56666     sichuan        101.7167       26.5833          134       127     2012      05        19        140              0.006000      33.797882       0.000000       0.105138       0.158000       0.018500       0.068800       0.425000
56666     56666     sichuan        101.7167       26.5833          134       127     2012      05        20        141              0.006042      34.500336       0.000000       0.104928       0.180000   -9999.000000   -9999.000000       0.222000
56666     56666     sichuan        101.7167       26.5833          134       127     2012      05        21        142              0.006250      35.513153       0.000000       0.104886       0.144500   -9999.000000   -9999.000000   -9999.000000
56666     56666     sichuan        101.7167       26.5833          134       127     2012      05        22        143              0.006292      36.481720       0.000000       0.104796       0.129000   -9999.000000   -9999.000000       0.573000
56666     56666     sichuan        101.7167       26.5833          134       127     2012      05        23        144              0.006375      35.570068       0.000000       0.105008   -9999.000000   -9999.000000       0.083900   -9999.000000
56666     56666     sichuan        101.7167       26.5833          134       127     2012      05        24        145              0.006417      35.958130       0.837119       0.104866       0.168000       0.042900       0.091600       0.377000
56666     56666     sichuan        101.7167       26.5833          134       127     2012      05        25        146              0.000000      35.812195       4.694048       0.107799       0.165000   -9999.000000       0.079000       0.150000
56666     56666     sichuan        101.7167       26.5833          134       127     2012      05        26        147              0.004792      31.163269       1.661263       0.129618       0.186500       0.163200   -9999.000000   -9999.000000
56666     56666     sichuan        101.7167       26.5833          134       127     2012      05        27        148              0.007208      24.711761       0.167904       0.180142       0.156000       0.069600   -9999.000000       0.351000
56666     56666     sichuan        101.7167       26.5833          134       127     2012      05        28        149              0.007208      29.737762       1.414059       0.151043   -9999.000000   -9999.000000   -9999.000000   -9999.000000
56666     56666     sichuan        101.7167       26.5833          134       127     2012      05        29        150              0.006542      29.997742       0.226208       0.144432   -9999.000000       0.044500       0.091600   -9999.000000
56666     56666     sichuan        101.7167       26.5833          134       127     2012      05        30        151              0.005792      27.462616       0.825070       0.136133       0.174000   -9999.000000       0.083900   -9999.000000
56666     56666     sichuan        101.7167       26.5833          134       127     2012      05        31        152              0.005542      25.992493       0.318272       0.133175       0.189000       0.062000   -9999.000000   -9999.000000
56666     56666     sichuan        101.7167       26.5833          134       127     2012      06        01        153              0.006958      25.039795      13.541498       0.127375       0.231500   -9999.000000   -9999.000000       1.000000
56666     56666     sichuan        101.7167       26.5833          134       127     2012      06        02        154              0.016458      23.683350       4.980148       0.208058   -9999.000000   -9999.000000   -9999.000000   -9999.000000
56666     56666     sichuan        101.7167       26.5833          134       127     2012      06        03        155              0.073167      22.023773      12.787296       0.255835   -9999.000000       0.175200   -9999.000000       0.953000
56666     56666     sichuan        101.7167       26.5833          134       127     2012      06        04        156              0.095708      24.245941       0.194042       0.288870       0.214000   -9999.000000       0.084500   -9999.000000
56666     56666     sichuan        101.7167       26.5833          134       127     2012      06        05        157              0.086083      25.404480       0.000000       0.257452       0.189500   -9999.000000       0.074200       0.486000
56666     56666     sichuan        101.7167       26.5833          134       127     2012      06        06        158              0.083083      28.469513       0.000000       0.223872       0.174500       0.246100   -9999.000000       0.597000
56666     56666     sichuan        101.7167       26.5833          134       127     2012      06        07        159              0.078750      29.531952       0.345785       0.197595   -9999.000000   -9999.000000   -9999.000000   -9999.000000
56666     56666     sichuan        101.7167       26.5833          134       127     2012      06        08        160              0.072417      30.749420       0.000000       0.175985   -9999.000000       0.094600       0.074400       0.188000
56666     56666     sichuan        101.7167       26.5833          134       127     2012      06        09        161              0.066875      30.171234       0.000000       0.160675       0.175000       0.129300       0.075000   -9999.000000
56666     56666     sichuan        101.7167       26.5833          134       127     2012      06        10        162              0.062958      31.262390       3.945083       0.146015       0.179500   -9999.000000       0.076500       0.362000
56666     56666     sichuan        101.7167       26.5833          134       127     2012      06        11        163              0.000000      30.363251       0.898283       0.172897       0.174500       0.160900       0.052100       0.517000
56666     56666     sichuan        101.7167       26.5833          134       127     2012      06        12        164              0.064292      27.236023       0.525106       0.172765       0.155000   -9999.000000   -9999.000000   -9999.000000
56666     56666     sichuan        101.7167       26.5833          134       127     2012      06        13        165              0.067458      27.276337       0.063646       0.165306   -9999.000000   -9999.000000   -9999.000000       0.094000
56666     56666     sichuan        101.7167       26.5833          134       127     2012      06        14        166              0.057792      30.397339       8.898565       0.147927       0.214000       0.128600       0.064400   -9999.000000
56666     56666     sichuan        101.7167       26.5833          134       127     2012      06        15        167              0.056667      25.334045       2.803178       0.203058       0.188500   -9999.000000       0.065600       0.491000
56666     56666     sichuan        101.7167       26.5833          134       127     2012      06        16        168              0.065458      25.419617       8.422514       0.213795       0.238000       0.214900       0.067500       1.000000
56666     56666     sichuan        101.7167       26.5833          134       127     2012      06        17        169              0.096500      22.033173       2.908339       0.264710       0.208500   -9999.000000   -9999.000000       0.861000
56666     56666     sichuan        101.7167       26.5833          134       127     2012      06        18        170              0.110125      22.763794       7.316288       0.247099   -9999.000000       0.139500   -9999.000000       1.000000
56666     56666     sichuan        101.7167       26.5833          134       127     2012      06        19        171              0.095125      26.420593       3.644511       0.254737   -9999.000000   -9999.000000   -9999.000000   -9999.000000
56666     56666     sichuan        101.7167       26.5833          134       127     2012      06        20        172              0.092667      25.041107       1.961591       0.271566       0.187000   -9999.000000       0.096700       0.616000
56666     56666     sichuan        101.7167       26.5833          134       127     2012      06        21        173              0.097000      25.031281      12.634871       0.252634       0.228000       0.173000       0.101000   -9999.000000
56666     56666     sichuan        101.7167       26.5833          134       127     2012      06        22        174              0.116708      25.202271       2.027287       0.281520       0.220000   -9999.000000       0.091400       0.810000
56666     56666     sichuan        101.7167       26.5833          134       127     2012      06        23        175              0.139917      24.418823      30.941774       0.281535   -9999.000000   -9999.000000   -9999.000000       0.841000
56666     56666     sichuan        101.7167       26.5833          134       127     2012      06        24        176              0.138542      25.282440       0.507052       0.317594   -9999.000000       0.198100   -9999.000000   -9999.000000
56666     56666     sichuan        101.7167       26.5833          134       127     2012      06        25        177              0.116083      25.303375       0.446705       0.313606       0.214000   -9999.000000       0.071900       0.779000
56666     56666     sichuan        101.7167       26.5833          134       127     2012      06        26        178              0.104792      25.757080       0.624527       0.290912       0.201500       0.253000       0.074700   -9999.000000
56666     56666     sichuan        101.7167       26.5833          134       127     2012      06        27        179              0.098042      27.040680       1.201997       0.276385       0.183000       0.265700       0.071900       0.506000
56666     56666     sichuan        101.7167       26.5833          134       127     2012      06        28        180              0.085292      27.831360       0.465886       0.266032       0.160000   -9999.000000   -9999.000000       0.911000
56666     56666     sichuan        101.7167       26.5833          134       127     2012      06        29        181              0.076792      27.440796       3.770167       0.259865   -9999.000000       0.148200   -9999.000000   -9999.000000
56666     56666     sichuan        101.7167       26.5833          134       127     2012      06        30        182              0.073333      28.180511      16.239576       0.253760   -9999.000000   -9999.000000   -9999.000000   -9999.000000
56666     56666     sichuan        101.7167       26.5833          134       127     2012      07        01        183              0.076458      25.778870       1.012001       0.305061       0.180500       0.177100       0.073600   -9999.000000
56666     56666     sichuan        101.7167       26.5833          134       127     2012      07        02        184              0.081333      26.940613       7.004126       0.295223       0.148000       0.145700       0.094400       0.409000
56666     56666     sichuan        101.7167       26.5833          134       127     2012      07        03        185              0.112333      27.545776       0.580484       0.289288   -9999.000000   -9999.000000       0.095000   -9999.000000
56666     56666     sichuan        101.7167       26.5833          134       127     2012      07        04        186              0.117125      25.489014      23.007860       0.290155   -9999.000000       0.203600   -9999.000000       0.715000
56666     56666     sichuan        101.7167       26.5833          134       127     2012      07        05        187              0.155625      25.199524       6.873472       0.299023   -9999.000000   -9999.000000   -9999.000000       1.000000
56666     56666     sichuan        101.7167       26.5833          134       127     2012      07        06        188              0.142333      24.959930       0.466829       0.329153   -9999.000000       0.323100   -9999.000000   -9999.000000
56666     56666     sichuan        101.7167       26.5833          134       127     2012      07        07        189              0.121375      25.618317       0.377943       0.309715   -9999.000000       0.442600       0.101400       0.648000
56666     56666     sichuan        101.7167       26.5833          134       127     2012      07        08        190              0.104708      26.868744       0.780762       0.294222       0.151500   -9999.000000       0.100400   -9999.000000
56666     56666     sichuan        101.7167       26.5833          134       127     2012      07        09        191              0.092000      27.770905       0.085269       0.283138   -9999.000000       0.220900       0.050700       0.617000
56666     56666     sichuan        101.7167       26.5833          134       127     2012      07        10        192              0.098250      26.959991       0.159610       0.278026   -9999.000000   -9999.000000   -9999.000000       0.787000
56666     56666     sichuan        101.7167       26.5833          134       127     2012      07        11        193              0.119875      26.576263       2.501902       0.270645       0.226000   -9999.000000   -9999.000000   -9999.000000
56666     56666     sichuan        101.7167       26.5833          134       127     2012      07        12        194              0.087167      27.404327      30.850698       0.269445   -9999.000000       0.177400       0.057700       1.000000
56666     56666     sichuan        101.7167       26.5833          134       127     2012      07        13        195              0.196375      26.489288      31.617676       0.311508       0.275500   -9999.000000       0.063500   -9999.000000
56666     56666     sichuan        101.7167       26.5833          134       127     2012      07        14        196              0.140417      24.400482       9.727286       0.356873       0.244000       0.351300       0.061800       0.773000
56666     56666     sichuan        101.7167       26.5833          134       127     2012      07        15        197              0.156042      26.639526       9.101105       0.329671   -9999.000000   -9999.000000   -9999.000000       0.881000
56666     56666     sichuan        101.7167       26.5833          134       127     2012      07        16        198              0.172958      25.818359      35.639664       0.336574       0.296000   -9999.000000   -9999.000000       1.000000
56666     56666     sichuan        101.7167       26.5833          134       127     2012      07        17        199              0.156917      24.841400       4.919251       0.355340       0.270500       0.305100   -9999.000000       1.000000
56666     56666     sichuan        101.7167       26.5833          134       127     2012      07        18        200              0.114583      25.518799       7.927233       0.341742       0.260500   -9999.000000       0.096800   -9999.000000
56666     56666     sichuan        101.7167       26.5833          134       127     2012      07        19        201              0.106583      25.663055       0.783802       0.337998       0.248500       0.200200       0.095700       0.903000
56666     56666     sichuan        101.7167       26.5833          134       127     2012      07        20        202              0.147083      25.996002       1.139835       0.322009   -9999.000000       0.179800       0.091600   -9999.000000
56666     56666     sichuan        101.7167       26.5833          134       127     2012      07        21        203              0.069391      26.042328       1.813504       0.314134   -9999.000000   -9999.000000   -9999.000000       0.789000
56666     56666     sichuan        101.7167       26.5833          134       127     2012      07        22        204              0.098375      26.586243      32.155849       0.306418   -9999.000000       0.178800   -9999.000000       1.000000
56666     56666     sichuan        101.7167       26.5833          134       127     2012      07        23        205              0.122167      23.981567       3.058405       0.352608       0.307000   -9999.000000   -9999.000000   -9999.000000
56666     56666     sichuan        101.7167       26.5833          134       127     2012      07        24        206              0.114708      24.335266       1.060129       0.337581       0.270000       0.146400       0.099700       1.000000
56666     56666     sichuan        101.7167       26.5833          134       127     2012      07        25        207              0.147167      26.060944       0.462770       0.316388   -9999.000000       0.226400       0.100100   -9999.000000
56666     56666     sichuan        101.7167       26.5833          134       127     2012      07        26        208              0.108750      25.736725       2.839139       0.307941   -9999.000000   -9999.000000       0.088300       0.650000
56666     56666     sichuan        101.7167       26.5833          134       127     2012      07        27        209              0.130042      27.043640      46.382511       0.299240   -9999.000000       0.143700   -9999.000000       0.848000
56666     56666     sichuan        101.7167       26.5833          134       127     2012      07        28        210              0.198500      26.762756      13.038248       0.332436       0.291500   -9999.000000   -9999.000000       1.000000
56666     56666     sichuan        101.7167       26.5833          134       127     2012      07        29        211              0.190208      24.565704       0.000000       0.357097       0.267500       0.190900       0.097700       0.946000
56666     56666     sichuan        101.7167       26.5833          134       127     2012      07        30        212              0.069792      25.851074      17.286087       0.328853       0.257000       0.186200       0.097200   -9999.000000
56666     56666     sichuan        101.7167       26.5833          134       127     2012      07        31        213              0.093125      27.197144      10.212263       0.329149   -9999.000000   -9999.000000       0.104200       0.772000
56666     56666     sichuan        101.7167       26.5833          134       127     2012      08        01        214              0.159458      25.388458       0.491650       0.365266   -9999.000000       0.183200   -9999.000000   -9999.000000
56666     56666     sichuan        101.7167       26.5833          134       127     2012      08        02        215              0.090250      24.805054       2.356745       0.327875       0.240000   -9999.000000   -9999.000000       0.736000
56666     56666     sichuan        101.7167       26.5833          134       127     2012      08        03        216              0.061667      25.094910       2.382309       0.319480       0.298000   -9999.000000   -9999.000000       1.000000
56666     56666     sichuan        101.7167       26.5833          134       127     2012      08        04        217              0.150542      25.502960       0.874097       0.316015       0.289000       0.154300       0.108100   -9999.000000
56666     56666     sichuan        101.7167       26.5833          134       127     2012      08        05        218              0.084625      27.071564      27.077471       0.305202   -9999.000000   -9999.000000       0.104400       0.523000
56666     56666     sichuan        101.7167       26.5833          134       127     2012      08        06        219              0.123500      27.114502      23.277231       0.320411   -9999.000000       0.272600       0.109100   -9999.000000
56666     56666     sichuan        101.7167       26.5833          134       127     2012      08        07        220              0.127167      24.641785       1.329331       0.357128       0.282000       0.257800   -9999.000000       0.880000
56666     56666     sichuan        101.7167       26.5833          134       127     2012      08        08        221              0.122250      25.867432       0.095468       0.326576       0.293000   -9999.000000   -9999.000000       0.909000
56666     56666     sichuan        101.7167       26.5833          134       127     2012      08        09        222              0.108625      26.650055       0.976844       0.314979       0.278500       0.144600       0.106900   -9999.000000
56666     56666     sichuan        101.7167       26.5833          134       127     2012      08        10        223              0.104208      27.054810       0.000000       0.304707       0.264000   -9999.000000       0.108700       0.458000
56666     56666     sichuan        101.7167       26.5833          134       127     2012      08        11        224              0.106958      26.729828       0.000000       0.296942   -9999.000000   -9999.000000       0.110700   -9999.000000
56666     56666     sichuan        101.7167       26.5833          134       127     2012      08        12        225              0.092833      27.314056       0.076799       0.290226       0.313000       0.116900       0.101400       0.614000
56666     56666     sichuan        101.7167       26.5833          134       127     2012      08        13        226              0.067583      28.006989      13.226923       0.284285       0.332000   -9999.000000   -9999.000000       0.679000
56666     56666     sichuan        101.7167       26.5833          134       127     2012      08        14        227              0.071304      27.537903      31.343363       0.307901       0.312000       0.247800   -9999.000000       0.702000
56666     56666     sichuan        101.7167       26.5833          134       127     2012      08        15        228              0.167417      26.736481      11.327335       0.330401       0.319000   -9999.000000       0.136800       1.000000
56666     56666     sichuan        101.7167       26.5833          134       127     2012      08        16        229              0.171167      26.074493      10.652257       0.346875   -9999.000000       0.131300       0.133300   -9999.000000
56666     56666     sichuan        101.7167       26.5833          134       127     2012      08        17        230              0.178500      26.479828       0.874651       0.334874   -9999.000000       0.171800       0.126700       0.720000
56666     56666     sichuan        101.7167       26.5833          134       127     2012      08        18        231              0.160000      27.001984       0.652597       0.324803       0.279000   -9999.000000   -9999.000000   -9999.000000
56666     56666     sichuan        101.7167       26.5833          134       127     2012      08        19        232              0.151250      26.340973       3.700478       0.313098       0.340000       0.175200   -9999.000000       0.815000
56666     56666     sichuan        101.7167       26.5833          134       127     2012      08        20        233              0.153583      25.000122       0.864376       0.315605       0.323500       0.195100   -9999.000000       0.738000
56666     56666     sichuan        101.7167       26.5833          134       127     2012      08        21        234              0.145625      25.607147       4.449934       0.306734   -9999.000000   -9999.000000       0.124800   -9999.000000
56666     56666     sichuan        101.7167       26.5833          134       127     2012      08        22        235              0.133125      24.848755       0.000000       0.314726   -9999.000000       0.366400       0.122000   -9999.000000
56666     56666     sichuan        101.7167       26.5833          134       127     2012      08        23        236              0.124458      23.206848       0.000000       0.303807       0.270000   -9999.000000       0.119000   -9999.000000
56666     56666     sichuan        101.7167       26.5833          134       127     2012      08        24        237              0.129583      22.727814      23.924091       0.299787       0.305000       0.206200   -9999.000000   -9999.000000
56666     56666     sichuan        101.7167       26.5833          134       127     2012      08        25        238              0.000000      23.793427      12.174987       0.316104       0.298500   -9999.000000   -9999.000000   -9999.000000
56666     56666     sichuan        101.7167       26.5833          134       127     2012      08        26        239              0.184375      23.591187      11.337341       0.345139   -9999.000000   -9999.000000       0.124200       0.955000
56666     56666     sichuan        101.7167       26.5833          134       127     2012      08        27        240              0.170208      23.877045       1.485772       0.341753   -9999.000000       0.112900       0.094200       0.969000
56666     56666     sichuan        101.7167       26.5833          134       127     2012      08        28        241              0.162750      24.586060       2.887385       0.322370   -9999.000000   -9999.000000       0.085100   -9999.000000
56666     56666     sichuan        101.7167       26.5833          134       127     2012      08        29        242              0.150833      25.722076       0.410776       0.317350       0.247500       0.117900       0.089500       0.608000
56666     56666     sichuan        101.7167       26.5833          134       127     2012      08        30        243              0.149417      25.019196       0.272573       0.312994       0.266500       0.131400   -9999.000000   -9999.000000
56666     56666     sichuan        101.7167       26.5833          134       127     2012      08        31        244              0.141167      26.225586       2.376779       0.305374       0.257000   -9999.000000   -9999.000000       0.691000
56666     56666     sichuan        101.7167       26.5833          134       127     2012      09        01        245              0.135875      26.306122      17.116299       0.304333   -9999.000000       0.254900       0.095500       0.950000
56666     56666     sichuan        101.7167       26.5833          134       127     2012      09        02        246              0.126083      25.924927       0.897730       0.318788   -9999.000000   -9999.000000       0.086400   -9999.000000
56666     56666     sichuan        101.7167       26.5833          134       127     2012      09        03        247              0.126500      23.036469       0.000000       0.325044       0.297500       0.265100       0.091000       0.622000
56666     56666     sichuan        101.7167       26.5833          134       127     2012      09        04        248              0.119708      24.000641       0.202130       0.310577       0.289000       0.216700   -9999.000000   -9999.000000
56666     56666     sichuan        101.7167       26.5833          134       127     2012      09        05        249              0.113708      23.268219       0.385476       0.305082       0.274500   -9999.000000   -9999.000000       0.525000
56666     56666     sichuan        101.7167       26.5833          134       127     2012      09        06        250              0.111500      23.179779       0.200649       0.301872   -9999.000000       0.118300   -9999.000000       0.755000
56666     56666     sichuan        101.7167       26.5833          134       127     2012      09        07        251              0.107458      24.685608       0.000000       0.297536   -9999.000000   -9999.000000       0.092600   -9999.000000
56666     56666     sichuan        101.7167       26.5833          134       127     2012      09        08        252              0.103250      25.003540       0.123517       0.293596       0.288000   -9999.000000       0.091400       0.328000
56666     56666     sichuan        101.7167       26.5833          134       127     2012      09        09        253              0.097958      25.731293       1.264970       0.289629       0.271000       0.158800       0.084900   -9999.000000
56666     56666     sichuan        101.7167       26.5833          134       127     2012      09        10        254              0.092750      26.308899       0.261340       0.285919       0.280500   -9999.000000   -9999.000000       0.593000
56666     56666     sichuan        101.7167       26.5833          134       127     2012      09        11        255              0.144292      26.375671      52.421341       0.283260   -9999.000000       0.138100   -9999.000000       0.522000
56666     56666     sichuan        101.7167       26.5833          134       127     2012      09        12        256              0.189792      23.032623      27.830154       0.370328   -9999.000000       0.157000       0.081100       1.000000
56666     56666     sichuan        101.7167       26.5833          134       127     2012      09        13        257              0.175250      20.868774       1.029024       0.363664   -9999.000000   -9999.000000       0.086500       0.900000
56666     56666     sichuan        101.7167       26.5833          134       127     2012      09        14        258              0.159000      20.858429       0.000000       0.340599       0.273500       0.137200       0.081600   -9999.000000
56666     56666     sichuan        101.7167       26.5833          134       127     2012      09        15        259              0.149250      20.879700       0.346293       0.326978       0.310000   -9999.000000   -9999.000000       0.664000
56666     56666     sichuan        101.7167       26.5833          134       127     2012      09        16        260              0.141833      20.692841       1.506480       0.320914       0.294000       0.141000   -9999.000000   -9999.000000
56666     56666     sichuan        101.7167       26.5833          134       127     2012      09        17        261              0.139583      20.782990       0.088293       0.319104   -9999.000000       0.124800   -9999.000000       0.757000
56666     56666     sichuan        101.7167       26.5833          134       127     2012      09        18        262              0.152125      21.495667      16.225698       0.315009   -9999.000000   -9999.000000       0.096100       0.598000
56666     56666     sichuan        101.7167       26.5833          134       127     2012      09        19        263              0.171708      22.173859       1.069331       0.326032   -9999.000000       0.274700       0.085500   -9999.000000
56666     56666     sichuan        101.7167       26.5833          134       127     2012      09        20        264              0.163417      20.911621       0.079732       0.331052       0.283500   -9999.000000       0.084500       0.894000
56666     56666     sichuan        101.7167       26.5833          134       127     2012      09        21        265              0.156667      22.358887       0.927946       0.319736   -9999.000000       0.199300   -9999.000000   -9999.000000
56666     56666     sichuan        101.7167       26.5833          134       127     2012      09        22        266              0.153708      22.695831       0.000000       0.315277       0.182000       0.393700   -9999.000000       0.684000
56666     56666     sichuan        101.7167       26.5833          134       127     2012      09        23        267              0.153833      23.283203       0.959027       0.310528   -9999.000000   -9999.000000   -9999.000000       0.941000
56666     56666     sichuan        101.7167       26.5833          134       127     2012      09        24        268              0.151958      24.092194       0.292350       0.307585   -9999.000000       0.345400       0.066500       0.636000
56666     56666     sichuan        101.7167       26.5833          134       127     2012      09        25        269              0.145917      24.240295       0.148391       0.303958       0.179000       0.142100       0.062900       0.890000
56666     56666     sichuan        101.7167       26.5833          134       127     2012      09        26        270              0.136125      24.835846       1.347852       0.300367   -9999.000000   -9999.000000       0.060500   -9999.000000
56666     56666     sichuan        101.7167       26.5833          134       127     2012      09        27        271              0.131357      24.537323       6.881164       0.300924       0.221000       0.362700   -9999.000000       0.630000
56666     56666     sichuan        101.7167       26.5833          134       127     2012      09        28        272              0.198267      23.472107      32.200169       0.311401   -9999.000000   -9999.000000   -9999.000000   -9999.000000
56666     56666     sichuan        101.7167       26.5833          134       127     2012      09        29        273              0.198250      21.070892       2.830840       0.356747   -9999.000000       0.230800       0.068600       0.759000
56666     56666     sichuan        101.7167       26.5833          134       127     2012      09        30        274              0.217000      20.654877      19.374325       0.332993   -9999.000000   -9999.000000       0.073700       1.000000
56666     56666     sichuan        101.7167       26.5833          134       127     2012      10        01        275              0.204292      20.849792       0.439746       0.347483       0.319500   -9999.000000       0.049100   -9999.000000
56666     56666     sichuan        101.7167       26.5833          134       127     2012      10        02        276              0.193583      21.106049       0.000000       0.335600       0.288000       0.212700   -9999.000000       0.692000
56666     56666     sichuan        101.7167       26.5833          134       127     2012      10        03        277              0.180792      22.496002       2.325911       0.324381       0.271000   -9999.000000   -9999.000000   -9999.000000
56666     56666     sichuan        101.7167       26.5833          134       127     2012      10        04        278              0.172667      21.425537       1.720119       0.322756   -9999.000000       0.052800   -9999.000000       0.812000
56666     56666     sichuan        101.7167       26.5833          134       127     2012      10        05        279              0.161167      21.673981       1.645045       0.319343       0.331000   -9999.000000       0.051600       0.932000
56666     56666     sichuan        101.7167       26.5833          134       127     2012      10        06        280              0.152333      20.658691       0.038830       0.317274       0.285000   -9999.000000       0.048000   -9999.000000
56666     56666     sichuan        101.7167       26.5833          134       127     2012      10        07        281              0.146167      20.042999       0.159552       0.314113       0.276500       0.179600       0.047900       0.493000
56666     56666     sichuan        101.7167       26.5833          134       127     2012      10        08        282              0.135708      21.855804       1.064667       0.310551       0.275000   -9999.000000   -9999.000000   -9999.000000
56666     56666     sichuan        101.7167       26.5833          134       127     2012      10        09        283              0.146333      22.762543      31.365484       0.307894   -9999.000000       0.196900   -9999.000000       1.000000
56666     56666     sichuan        101.7167       26.5833          134       127     2012      10        10        284              0.193000      21.654022       2.345398       0.344505   -9999.000000   -9999.000000   -9999.000000       1.000000
56666     56666     sichuan        101.7167       26.5833          134       127     2012      10        11        285              0.183542      21.013458       0.000000       0.338899       0.295500   -9999.000000       0.116700       0.769000
56666     56666     sichuan        101.7167       26.5833          134       127     2012      10        12        286              0.174250      22.217255       1.056019       0.325366       0.325500       0.210500       0.108800       0.794000
56666     56666     sichuan        101.7167       26.5833          134       127     2012      10        13        287              0.166000      21.645538       0.000000       0.319246       0.289500   -9999.000000       0.106100   -9999.000000
56666     56666     sichuan        101.7167       26.5833          134       127     2012      10        14        288              0.153000      22.551025       0.000000       0.314080       0.276000   -9999.000000   -9999.000000       0.932000
56666     56666     sichuan        101.7167       26.5833          134       127     2012      10        15        289              0.138292      22.496521       0.000000       0.310088   -9999.000000       0.248400   -9999.000000   -9999.000000
56666     56666     sichuan        101.7167       26.5833          134       127     2012      10        16        290              0.122917      22.109131       0.000000       0.307328       0.294000   -9999.000000       0.155400       0.350000
56666     56666     sichuan        101.7167       26.5833          134       127     2012      10        17        291              0.112417      21.352936       0.000000       0.305093       0.311500       0.285900       0.158700       0.388000
56666     56666     sichuan        101.7167       26.5833          134       127     2012      10        18        292              0.104083      20.316223       0.000000       0.304772       0.274500       0.126300       0.150500   -9999.000000
56666     56666     sichuan        101.7167       26.5833          134       127     2012      10        19        293              0.095167      20.701752       0.000000       0.302594       0.251000   -9999.000000   -9999.000000       0.740000
56666     56666     sichuan        101.7167       26.5833          134       127     2012      10        20        294              0.088167      20.575684       0.000000       0.300538   -9999.000000       0.163200   -9999.000000   -9999.000000
56666     56666     sichuan        101.7167       26.5833          134       127     2012      10        21        295              0.082417      20.458038       0.000000       0.298693   -9999.000000   -9999.000000   -9999.000000       0.346000
56666     56666     sichuan        101.7167       26.5833          134       127     2012      10        22        296              0.078250      20.202728       0.000000       0.296968   -9999.000000       0.044000       0.157000       0.564000
56666     56666     sichuan        101.7167       26.5833          134       127     2012      10        23        297              0.074542      19.964111       0.000000       0.295503   -9999.000000       0.178700       0.155600       0.467000
56666     56666     sichuan        101.7167       26.5833          134       127     2012      10        24        298              0.071333      19.989380       0.000000       0.293859   -9999.000000   -9999.000000       0.150100       0.664000
56666     56666     sichuan        101.7167       26.5833          134       127     2012      10        25        299              0.000000      19.993500       0.000000       0.292131   -9999.000000       0.248200   -9999.000000   -9999.000000
56666     56666     sichuan        101.7167       26.5833          134       127     2012      10        26        300              0.065375      19.957031       0.000000       0.290083   -9999.000000   -9999.000000   -9999.000000       0.193000
56666     56666     sichuan        101.7167       26.5833          134       127     2012      10        27        301              0.063167      19.677002       0.000000       0.288366       0.406000       0.057600       0.151800   -9999.000000
56666     56666     sichuan        101.7167       26.5833          134       127     2012      10        28        302              0.000000      19.530731       0.000000       0.287034       0.395500   -9999.000000       0.159100       0.219000
56666     56666     sichuan        101.7167       26.5833          134       127     2012      10        29        303              0.060958      19.857452       0.000000       0.285879       0.382500   -9999.000000       0.162600       0.644000
56666     56666     sichuan        101.7167       26.5833          134       127     2012      10        30        304              0.059000      20.362701       0.000000       0.284503       0.363000   -9999.000000   -9999.000000   -9999.000000
56666     56666     sichuan        101.7167       26.5833          134       127     2012      10        31        305              0.057167      19.060852       0.000000       0.283358   -9999.000000   -9999.000000   -9999.000000       0.098000
56666     56666     sichuan        101.7167       26.5833          134       127     2012      11        01        306              0.055833      18.239899       0.000000       0.283211       0.351000   -9999.000000   -9999.000000   -9999.000000
56666     56666     sichuan        101.7167       26.5833          134       127     2012      11        02        307              0.054500      18.684998       0.000000       0.282373       0.317000       0.108800       0.159200       0.327000
56666     56666     sichuan        101.7167       26.5833          134       127     2012      11        03        308              0.058750      18.327393       0.256410       0.281003       0.314500   -9999.000000       0.162000       0.504000
56666     56666     sichuan        101.7167       26.5833          134       127     2012      11        04        309              0.057958      18.073761       0.000000       0.280092       0.311000       0.040100       0.153600   -9999.000000
56666     56666     sichuan        101.7167       26.5833          134       127     2012      11        05        310              0.056042      18.187073       0.000000       0.279460   -9999.000000       0.025700   -9999.000000       0.322000
56666     56666     sichuan        101.7167       26.5833          134       127     2012      11        06        311              0.054708      18.261292       0.000000       0.278643   -9999.000000   -9999.000000   -9999.000000   -9999.000000
56666     56666     sichuan        101.7167       26.5833          134       127     2012      11        07        312              0.054000      18.510986       0.000000       0.278383       0.306000       0.137500   -9999.000000       0.587000
56666     56666     sichuan        101.7167       26.5833          134       127     2012      11        08        313              0.055208      18.451965       0.000000       0.278760       0.336000   -9999.000000       0.175100       0.569000
56666     56666     sichuan        101.7167       26.5833          134       127     2012      11        09        314              0.053000      18.399414       0.000000       0.276842       0.307500       0.124200       0.178100       0.419000
56666     56666     sichuan        101.7167       26.5833          134       127     2012      11        10        315              0.050792      17.729614       0.000000       0.275101       0.279000       0.076800       0.170600       0.224000
56666     56666     sichuan        101.7167       26.5833          134       127     2012      11        11        316              0.049417      17.245880       0.000000       0.274671   -9999.000000   -9999.000000   -9999.000000   -9999.000000
56666     56666     sichuan        101.7167       26.5833          134       127     2012      11        12        317              0.048417      16.953033       0.000000       0.274614   -9999.000000       0.131600   -9999.000000       0.513000
56666     56666     sichuan        101.7167       26.5833          134       127     2012      11        13        318              0.000000      17.171783       0.000000       0.274110       0.364500   -9999.000000       0.168800   -9999.000000
56666     56666     sichuan        101.7167       26.5833          134       127     2012      11        14        319              0.045958      17.309875       0.000000       0.273506       0.345500   -9999.000000       0.172100       0.221000
56666     56666     sichuan        101.7167       26.5833          134       127     2012      11        15        320              0.045208      17.302917       1.663021       0.273277       0.323000       0.106500       0.162800       0.449000
56666     56666     sichuan        101.7167       26.5833          134       127     2012      11        16        321              0.044417      17.365448       0.000000       0.272753   -9999.000000   -9999.000000   -9999.000000   -9999.000000
56666     56666     sichuan        101.7167       26.5833          134       127     2012      11        17        322              0.000000      17.126770       0.000000       0.272357   -9999.000000   -9999.000000   -9999.000000       0.511000
56666     56666     sichuan        101.7167       26.5833          134       127     2012      11        18        323              0.040917      17.007538       0.000000       0.272044       0.336500   -9999.000000   -9999.000000   -9999.000000
56666     56666     sichuan        101.7167       26.5833          134       127     2012      11        19        324              0.040417      16.572937       0.000000       0.272572       0.344000   -9999.000000       0.196500       0.184000
56666     56666     sichuan        101.7167       26.5833          134       127     2012      11        20        325              0.040292      16.663239       0.000000       0.272370       0.335500       0.144100       0.195100       0.297000
56666     56666     sichuan        101.7167       26.5833          134       127     2012      11        21        326              0.039292      17.130432       0.000000       0.271119   -9999.000000   -9999.000000       0.181300       0.059000
56666     56666     sichuan        101.7167       26.5833          134       127     2012      11        22        327              0.038083      17.088654       0.000000       0.270255   -9999.000000   -9999.000000   -9999.000000       0.183000
56666     56666     sichuan        101.7167       26.5833          134       127     2012      11        23        328              0.036792      16.839996       0.000000       0.269626       0.359000   -9999.000000   -9999.000000   -9999.000000
56666     56666     sichuan        101.7167       26.5833          134       127     2012      11        24        329              0.036208      16.629547       0.000000       0.269443       0.359000   -9999.000000   -9999.000000       0.127000
56666     56666     sichuan        101.7167       26.5833          134       127     2012      11        25        330              0.035417      16.557465       0.000000       0.269074       0.332500       0.045300       0.195100   -9999.000000
56666     56666     sichuan        101.7167       26.5833          134       127     2012      11        26        331              0.033792      16.550232       0.000000       0.268568       0.328000   -9999.000000   -9999.000000       0.241000
56666     56666     sichuan        101.7167       26.5833          134       127     2012      11        27        332              0.033042      16.346924       0.000000       0.268485   -9999.000000   -9999.000000       0.181000       0.371000
56666     56666     sichuan        101.7167       26.5833          134       127     2012      11        28        333              0.031792      16.258759       0.000000       0.267921       0.335000       0.124500   -9999.000000   -9999.000000
56666     56666     sichuan        101.7167       26.5833          134       127     2012      11        29        334              0.030792      15.811035       0.000000       0.267196       0.334500   -9999.000000   -9999.000000       0.069000
56666     56666     sichuan        101.7167       26.5833          134       127     2012      11        30        335              0.030250      15.593689       0.000000       0.267270       0.348000       0.115200       0.182900   -9999.000000
56666     56666     sichuan        101.7167       26.5833          134       127     2012      12        01        336              0.029417      15.364319       0.000000       0.266945       0.277000   -9999.000000       0.187700       0.112000
56666     56666     sichuan        101.7167       26.5833          134       127     2012      12        02        337              0.028500      15.021942       0.000000       0.266676   -9999.000000       0.133500       0.174600       0.249000
56666     56666     sichuan        101.7167       26.5833          134       127     2012      12        03        338              0.028292      14.385620       0.000000       0.266408   -9999.000000   -9999.000000   -9999.000000   -9999.000000
56666     56666     sichuan        101.7167       26.5833          134       127     2012      12        04        339              0.027708      14.090912       0.000000       0.266828       0.272500   -9999.000000   -9999.000000       0.122000
56666     56666     sichuan        101.7167       26.5833          134       127     2012      12        05        340              0.026833      14.193054       0.000000       0.266821       0.298500       0.009000   -9999.000000   -9999.000000
56666     56666     sichuan        101.7167       26.5833          134       127     2012      12        06        341              0.026250      13.676361       0.000000       0.267074       0.286000   -9999.000000       0.170100       0.053000
56666     56666     sichuan        101.7167       26.5833          134       127     2012      12        07        342              0.025458      13.839630       0.000000       0.267683       0.275000   -9999.000000       0.172000       0.237000
56666     56666     sichuan        101.7167       26.5833          134       127     2012      12        08        343              0.024417      13.515533       0.000000       0.268738   -9999.000000       0.083400       0.160700       0.166000
56666     56666     sichuan        101.7167       26.5833          134       127     2012      12        09        344              0.025292      12.804443      43.485031       0.270018       0.282000   -9999.000000   -9999.000000       0.323000
56666     56666     sichuan        101.7167       26.5833          134       127     2012      12        10        345              0.025500      13.887482       0.000000       0.269706       0.306000       0.122400   -9999.000000   -9999.000000
56666     56666     sichuan        101.7167       26.5833          134       127     2012      12        11        346              0.024417      14.245972       0.000000       0.268785       0.277000   -9999.000000       0.155700       0.184000
56666     56666     sichuan        101.7167       26.5833          134       127     2012      12        12        347              0.024083      13.546600       0.000000       0.268633       0.270000   -9999.000000       0.153600   -9999.000000
56666     56666     sichuan        101.7167       26.5833          134       127     2012      12        13        348              0.024000      13.836456       0.000000       0.268310   -9999.000000       0.084900       0.153900       0.027000
56666     56666     sichuan        101.7167       26.5833          134       127     2012      12        14        349              0.023292      13.995728       0.000000       0.267000   -9999.000000   -9999.000000       0.143100       0.215000
56666     56666     sichuan        101.7167       26.5833          134       127     2012      12        15        350              0.000000      13.668243       0.000000       0.265767       0.266000   -9999.000000   -9999.000000   -9999.000000
56666     56666     sichuan        101.7167       26.5833          134       127     2012      12        16        351              0.021083      13.374939       0.000000       0.265160       0.274000       0.018500   -9999.000000       0.515000
56666     56666     sichuan        101.7167       26.5833          134       127     2012      12        17        352              0.020792      13.077667       0.000000       0.265186       0.271500   -9999.000000       0.150200   -9999.000000
56666     56666     sichuan        101.7167       26.5833          134       127     2012      12        18        353              0.020417      13.177826       0.000000       0.265039   -9999.000000       0.102900       0.153700       0.014000
56666     56666     sichuan        101.7167       26.5833          134       127     2012      12        19        354              0.020250      13.065338       0.000000       0.264673   -9999.000000   -9999.000000       0.141800       0.006000
56666     56666     sichuan        101.7167       26.5833          134       127     2012      12        20        355              0.000000      13.446289       0.000000       0.264603       0.277000       0.050800   -9999.000000       0.110000
56666     56666     sichuan        101.7167       26.5833          134       127     2012      12        21        356              0.019625      13.820160       0.000000       0.263491       0.338000       0.144900   -9999.000000       0.064000
56666     56666     sichuan        101.7167       26.5833          134       127     2012      12        22        357              0.018583      13.516693       0.000000       0.262684       0.299000   -9999.000000   -9999.000000   -9999.000000
56666     56666     sichuan        101.7167       26.5833          134       127     2012      12        23        358              0.017500      12.964294       0.000000       0.261962       0.291000       0.076800       0.152300       0.152000
56666     56666     sichuan        101.7167       26.5833          134       127     2012      12        24        359              0.016421      11.986725       0.000000       0.261623   -9999.000000   -9999.000000       0.162900   -9999.000000
56666     56666     sichuan        101.7167       26.5833          134       127     2012      12        25        360              0.017000      12.135895       0.000000       0.262322       0.316000   -9999.000000       0.154100       0.127000
56666     56666     sichuan        101.7167       26.5833          134       127     2012      12        26        361              0.000000      12.573212       0.098446       0.261867       0.304500       0.078100   -9999.000000       0.149000
56666     56666     sichuan        101.7167       26.5833          134       127     2012      12        27        362              0.017400      12.338348       0.000000       0.260947       0.307000   -9999.000000   -9999.000000   -9999.000000
56666     56666     sichuan        101.7167       26.5833          134       127     2012      12        28        363              0.000000      12.060547       0.000000       0.260134       0.299500       0.033600       0.160100       0.141000
56666     56666     sichuan        101.7167       26.5833          134       127     2012      12        29        364              0.000000      12.011597       0.000000       0.259853   -9999.000000   -9999.000000       0.166400   -9999.000000
56666     56666     sichuan        101.7167       26.5833          134       127     2012      12        30        365              0.000000      12.025665       0.000000       0.257837   -9999.000000   -9999.000000       0.172100       0.230000
56666     56666     sichuan        101.7167       26.5833          134       127     2012      12        31        366              0.014667       7.157959       0.000000       0.258766       0.327500       0.099600   -9999.000000       0.031000
