# Supplementary material for: Research on Fusing Multisatellite Soil Moisture Data Based on Bayesian Model Averaging
Source: Hindawi journal article supplement (doi:10.1155/2018/9310838), 2018-06-25
Supplement: f1 [file 9310838.f1.zip › 2012_sm00-10cm_daily_ZDB_ZHY_56675_366days_allin.txt]

56675     56675     sichuan        102.5833       26.6500          133       130     2012      01        01        001              0.000000   -9999.000000       0.000000   -9999.000000       0.303000       0.024100   -9999.000000   -9999.000000
56675     56675     sichuan        102.5833       26.6500          133       130     2012      01        02        002              0.047708       7.946075       0.385218       0.259220   -9999.000000   -9999.000000       0.147300   -9999.000000
56675     56675     sichuan        102.5833       26.6500          133       130     2012      01        03        003              0.000000      11.330414       0.369723       0.258494   -9999.000000   -9999.000000       0.148800       0.060000
56675     56675     sichuan        102.5833       26.6500          133       130     2012      01        04        004              0.048083       9.731934       0.950832       0.259241       0.375000   -9999.000000       0.152900   -9999.000000
56675     56675     sichuan        102.5833       26.6500          133       130     2012      01        05        005              0.049583       6.650421       0.991082       0.263805       0.327000   -9999.000000       0.146700       0.072000
56675     56675     sichuan        102.5833       26.6500          133       130     2012      01        06        006              0.049708       7.071869       0.104581       0.264935       0.301000   -9999.000000   -9999.000000       0.070000
56675     56675     sichuan        102.5833       26.6500          133       130     2012      01        07        007              0.049667       8.136566       1.736872       0.261614   -9999.000000   -9999.000000   -9999.000000   -9999.000000
56675     56675     sichuan        102.5833       26.6500          133       130     2012      01        08        008              0.000000       8.183105       0.000000       0.260253       0.330000   -9999.000000       0.147700       0.047000
56675     56675     sichuan        102.5833       26.6500          133       130     2012      01        09        009              0.048958       8.604462       0.034049       0.259190       0.325500       0.019900       0.134800   -9999.000000
56675     56675     sichuan        102.5833       26.6500          133       130     2012      01        10        010              0.048625       9.644318       0.039439       0.258337       0.304500   -9999.000000   -9999.000000       0.114000
56675     56675     sichuan        102.5833       26.6500          133       130     2012      01        11        011              0.048208       9.033356       0.616389       0.259145       0.253000   -9999.000000   -9999.000000       0.068000
56675     56675     sichuan        102.5833       26.6500          133       130     2012      01        12        012              0.047667       8.339935       1.519435       0.259540   -9999.000000   -9999.000000   -9999.000000       0.108000
56675     56675     sichuan        102.5833       26.6500          133       130     2012      01        13        013              0.047208       8.894836       0.128084       0.258486   -9999.000000   -9999.000000   -9999.000000       0.070000
56675     56675     sichuan        102.5833       26.6500          133       130     2012      01        14        014              0.046625       7.964233       0.637501       0.259148       0.273500   -9999.000000       0.137800   -9999.000000
56675     56675     sichuan        102.5833       26.6500          133       130     2012      01        15        015              0.046042       7.715332       0.000000       0.259643       0.262000   -9999.000000       0.136100       0.043000
56675     56675     sichuan        102.5833       26.6500          133       130     2012      01        16        016              0.045667       7.483368       0.000000       0.258130       0.254000   -9999.000000       0.149300   -9999.000000
56675     56675     sichuan        102.5833       26.6500          133       130     2012      01        17        017              0.000000       7.750366       0.000000       0.256554   -9999.000000   -9999.000000   -9999.000000       0.091000
56675     56675     sichuan        102.5833       26.6500          133       130     2012      01        18        018              0.045250       7.258331       0.000000       0.257137   -9999.000000   -9999.000000   -9999.000000       0.029000
56675     56675     sichuan        102.5833       26.6500          133       130     2012      01        19        019              0.045042       7.886383       0.000000       0.256372       0.271000       0.006700       0.153600   -9999.000000
56675     56675     sichuan        102.5833       26.6500          133       130     2012      01        20        020              0.044708       9.095764       0.000000       0.254791       0.260500   -9999.000000       0.153900       0.190000
56675     56675     sichuan        102.5833       26.6500          133       130     2012      01        21        021              0.044000       9.629364       0.254470       0.253489       0.300500   -9999.000000       0.153100   -9999.000000
56675     56675     sichuan        102.5833       26.6500          133       130     2012      01        22        022              0.043417       8.491791       0.000000       0.254522       0.276000   -9999.000000       0.148900       0.033000
56675     56675     sichuan        102.5833       26.6500          133       130     2012      01        23        023              0.043167       7.827545       0.000000       0.254424   -9999.000000   -9999.000000   -9999.000000       0.027000
56675     56675     sichuan        102.5833       26.6500          133       130     2012      01        24        024              0.042833       9.105591       0.000000       0.253092   -9999.000000   -9999.000000   -9999.000000   -9999.000000
56675     56675     sichuan        102.5833       26.6500          133       130     2012      01        25        025              0.042500       9.150360       1.515688       0.251613       0.312500   -9999.000000       0.147800       0.075000
56675     56675     sichuan        102.5833       26.6500          133       130     2012      01        26        026              0.042292       8.737244       0.000000       0.251336       0.309000   -9999.000000       0.146500   -9999.000000
56675     56675     sichuan        102.5833       26.6500          133       130     2012      01        27        027              0.042250       9.618469       0.289859       0.250585       0.282000       0.039500       0.143100       0.093000
56675     56675     sichuan        102.5833       26.6500          133       130     2012      01        28        028              0.041750      11.343933       0.000000       0.249467   -9999.000000   -9999.000000   -9999.000000   -9999.000000
56675     56675     sichuan        102.5833       26.6500          133       130     2012      01        29        029              0.041375      10.815247       0.000000       0.246782   -9999.000000   -9999.000000   -9999.000000       0.117000
56675     56675     sichuan        102.5833       26.6500          133       130     2012      01        30        030              0.040708      10.792175       0.000000       0.245384       0.323000   -9999.000000   -9999.000000       0.112000
56675     56675     sichuan        102.5833       26.6500          133       130     2012      01        31        031              0.040500      11.175049       0.165632       0.244641       0.291500   -9999.000000       0.154100   -9999.000000
56675     56675     sichuan        102.5833       26.6500          133       130     2012      02        01        032              0.040208      11.191589       0.000000       0.243957       0.220000       0.023900       0.153500       0.109000
56675     56675     sichuan        102.5833       26.6500          133       130     2012      02        02        033              0.039750      11.380615       0.000000       0.243051   -9999.000000   -9999.000000       0.151300   -9999.000000
56675     56675     sichuan        102.5833       26.6500          133       130     2012      02        03        034              0.039667      10.917999       0.000000       0.242565   -9999.000000   -9999.000000   -9999.000000       0.101000
56675     56675     sichuan        102.5833       26.6500          133       130     2012      02        04        035              0.039292      11.037750       0.000000       0.242236       0.216500   -9999.000000   -9999.000000       0.102000
56675     56675     sichuan        102.5833       26.6500          133       130     2012      02        05        036              0.039000      11.505707       0.000000       0.241371       0.228500   -9999.000000       0.154300   -9999.000000
56675     56675     sichuan        102.5833       26.6500          133       130     2012      02        06        037              0.038750      12.105774       0.000000       0.239824       0.223500   -9999.000000       0.151500       0.055000
56675     56675     sichuan        102.5833       26.6500          133       130     2012      02        07        038              0.038542      12.295471       0.000000       0.238356   -9999.000000   -9999.000000       0.151000   -9999.000000
56675     56675     sichuan        102.5833       26.6500          133       130     2012      02        08        039              0.038583      11.933838       0.000000       0.238409   -9999.000000   -9999.000000       0.145900       0.190000
56675     56675     sichuan        102.5833       26.6500          133       130     2012      02        09        040              0.038333      13.620850       0.000000       0.236734       0.240000   -9999.000000   -9999.000000       0.124000
56675     56675     sichuan        102.5833       26.6500          133       130     2012      02        10        041              0.037750      14.521667       0.000000       0.231677       0.239000   -9999.000000   -9999.000000       0.010000
56675     56675     sichuan        102.5833       26.6500          133       130     2012      02        11        042              0.037458      12.154205       0.000000       0.232415       0.220000   -9999.000000       0.144400       0.117000
56675     56675     sichuan        102.5833       26.6500          133       130     2012      02        12        043              0.037167      13.272461       0.000000       0.230716   -9999.000000   -9999.000000       0.146300   -9999.000000
56675     56675     sichuan        102.5833       26.6500          133       130     2012      02        13        044              0.037292      12.249634       0.568007       0.230750   -9999.000000   -9999.000000       0.156200       0.064000
56675     56675     sichuan        102.5833       26.6500          133       130     2012      02        14        045              0.036917      13.336090       0.000000       0.231942       0.262000   -9999.000000   -9999.000000   -9999.000000
56675     56675     sichuan        102.5833       26.6500          133       130     2012      02        15        046              0.036542      13.647064       0.252145       0.228256       0.261000   -9999.000000   -9999.000000       0.087000
56675     56675     sichuan        102.5833       26.6500          133       130     2012      02        16        047              0.036375      14.298950       0.000000       0.226022       0.246500   -9999.000000   -9999.000000       0.080000
56675     56675     sichuan        102.5833       26.6500          133       130     2012      02        17        048              0.036208      15.130402       0.000000       0.223263       0.238000   -9999.000000       0.157900   -9999.000000
56675     56675     sichuan        102.5833       26.6500          133       130     2012      02        18        049              0.035792      16.065002       0.000000       0.219077   -9999.000000   -9999.000000       0.162400       0.373000
56675     56675     sichuan        102.5833       26.6500          133       130     2012      02        19        050              0.035542      13.801575       0.000000       0.219480   -9999.000000       0.008700       0.153000   -9999.000000
56675     56675     sichuan        102.5833       26.6500          133       130     2012      02        20        051              0.035417      13.615143       0.000000       0.219635       0.251000   -9999.000000   -9999.000000       0.062000
56675     56675     sichuan        102.5833       26.6500          133       130     2012      02        21        052              0.034957      14.246674       0.000000       0.217937       0.213500       0.004100   -9999.000000       0.114000
56675     56675     sichuan        102.5833       26.6500          133       130     2012      02        22        053              0.034739      13.926483       0.000000       0.217901       0.201500   -9999.000000       0.165500   -9999.000000
56675     56675     sichuan        102.5833       26.6500          133       130     2012      02        23        054              0.034739      14.370880       0.000000       0.217371   -9999.000000   -9999.000000       0.164800       0.005000
56675     56675     sichuan        102.5833       26.6500          133       130     2012      02        24        055              0.034542      15.067932       0.000000       0.216583   -9999.000000   -9999.000000       0.166500   -9999.000000
56675     56675     sichuan        102.5833       26.6500          133       130     2012      02        25        056              0.034333      15.925690       0.000000       0.214936       0.213500   -9999.000000   -9999.000000       0.242000
56675     56675     sichuan        102.5833       26.6500          133       130     2012      02        26        057              0.034000      16.226379       0.000000       0.211163       0.219000   -9999.000000   -9999.000000       0.114000
56675     56675     sichuan        102.5833       26.6500          133       130     2012      02        27        058              0.033381      15.898376       0.000000       0.205997       0.203000   -9999.000000   -9999.000000       0.115000
56675     56675     sichuan        102.5833       26.6500          133       130     2012      02        28        059              0.033783      14.436188       0.000000       0.204216       0.200000   -9999.000000   -9999.000000       0.119000
56675     56675     sichuan        102.5833       26.6500          133       130     2012      02        29        060              0.000000   -9999.000000       0.094549   -9999.000000   -9999.000000   -9999.000000   -9999.000000   -9999.000000
56675     56675     sichuan        102.5833       26.6500          133       130     2012      03        01        061              0.033261      15.589508       2.223240       0.200732       0.220000   -9999.000000       0.135400       0.165000
56675     56675     sichuan        102.5833       26.6500          133       130     2012      03        02        062              0.033250      12.767487       1.076256       0.217556       0.215500   -9999.000000   -9999.000000   -9999.000000
56675     56675     sichuan        102.5833       26.6500          133       130     2012      03        03        063              0.033125      12.274017       0.314426       0.220436       0.212000       0.020100   -9999.000000       0.027000
56675     56675     sichuan        102.5833       26.6500          133       130     2012      03        04        064              0.033292      10.997223       1.075139       0.222619       0.200000   -9999.000000   -9999.000000   -9999.000000
56675     56675     sichuan        102.5833       26.6500          133       130     2012      03        05        065              0.033167      11.863586       0.000000       0.225218   -9999.000000       0.045600       0.152100   -9999.000000
56675     56675     sichuan        102.5833       26.6500          133       130     2012      03        06        066              0.033208      13.182648       0.000000       0.219110       0.207000   -9999.000000       0.152100       0.052000
56675     56675     sichuan        102.5833       26.6500          133       130     2012      03        07        067              0.000000      14.660034       0.106003       0.214396       0.221000   -9999.000000       0.147900   -9999.000000
56675     56675     sichuan        102.5833       26.6500          133       130     2012      03        08        068              0.033208      13.700165       0.205494       0.213160       0.218000   -9999.000000   -9999.000000       0.087000
56675     56675     sichuan        102.5833       26.6500          133       130     2012      03        09        069              0.033042      14.955627       0.000000       0.212078       0.217000   -9999.000000   -9999.000000       0.017000
56675     56675     sichuan        102.5833       26.6500          133       130     2012      03        10        070              0.032792      15.849945       0.000000       0.205849   -9999.000000   -9999.000000       0.148400   -9999.000000
56675     56675     sichuan        102.5833       26.6500          133       130     2012      03        11        071              0.032667      17.082245       0.000000       0.200447   -9999.000000   -9999.000000       0.152000       0.128000
56675     56675     sichuan        102.5833       26.6500          133       130     2012      03        12        072              0.032333      17.681183       0.000000       0.193892       0.219500   -9999.000000       0.131000   -9999.000000
56675     56675     sichuan        102.5833       26.6500          133       130     2012      03        13        073              0.032208      18.355347       0.000000       0.187341       0.212500   -9999.000000   -9999.000000       0.076000
56675     56675     sichuan        102.5833       26.6500          133       130     2012      03        14        074              0.032083      18.910583       0.000000       0.182810       0.198000   -9999.000000   -9999.000000   -9999.000000
56675     56675     sichuan        102.5833       26.6500          133       130     2012      03        15        075              0.031792      18.431732       0.000000       0.179504   -9999.000000   -9999.000000   -9999.000000       0.085000
56675     56675     sichuan        102.5833       26.6500          133       130     2012      03        16        076              0.031000      18.582520       0.000000       0.175989   -9999.000000   -9999.000000       0.130500       0.064000
56675     56675     sichuan        102.5833       26.6500          133       130     2012      03        17        077              0.000000      17.983673       0.000000       0.173017       0.208000   -9999.000000       0.133800   -9999.000000
56675     56675     sichuan        102.5833       26.6500          133       130     2012      03        18        078              0.000000      17.260956       0.000000       0.172076       0.200500       0.034900       0.127500       0.062000
56675     56675     sichuan        102.5833       26.6500          133       130     2012      03        19        079              0.000000      17.791473       0.000000       0.171215       0.192000   -9999.000000   -9999.000000   -9999.000000
56675     56675     sichuan        102.5833       26.6500          133       130     2012      03        20        080              0.000000      18.370972       0.000000       0.168154       0.185000   -9999.000000   -9999.000000       0.055000
56675     56675     sichuan        102.5833       26.6500          133       130     2012      03        21        081              0.000000      19.547455       0.000000       0.165779   -9999.000000       0.030000   -9999.000000       0.091000
56675     56675     sichuan        102.5833       26.6500          133       130     2012      03        22        082              0.000000      20.297668       0.049096       0.162624       0.207000   -9999.000000       0.153500   -9999.000000
56675     56675     sichuan        102.5833       26.6500          133       130     2012      03        23        083              0.000000      19.453583       0.753523       0.162688       0.225000   -9999.000000       0.163100       0.047000
56675     56675     sichuan        102.5833       26.6500          133       130     2012      03        24        084              0.000000      10.715942       0.000000       0.178690       0.193000   -9999.000000       0.148000   -9999.000000
56675     56675     sichuan        102.5833       26.6500          133       130     2012      03        25        085              0.000000      14.655426       0.142750       0.180058       0.167000   -9999.000000   -9999.000000       0.027000
56675     56675     sichuan        102.5833       26.6500          133       130     2012      03        26        086              0.000000      17.329468       0.589672       0.178936   -9999.000000   -9999.000000   -9999.000000   -9999.000000
56675     56675     sichuan        102.5833       26.6500          133       130     2012      03        27        087              0.030000      18.921875       0.452570       0.176109   -9999.000000   -9999.000000       0.153900       0.085000
56675     56675     sichuan        102.5833       26.6500          133       130     2012      03        28        088              0.000000      18.497101       0.120356       0.179211       0.191000   -9999.000000       0.149700       0.125000
56675     56675     sichuan        102.5833       26.6500          133       130     2012      03        29        089              0.031167      20.287323       0.000000       0.174198       0.174000       0.062400       0.139300   -9999.000000
56675     56675     sichuan        102.5833       26.6500          133       130     2012      03        30        090              0.030917      20.937988       3.564134       0.165637       0.181500   -9999.000000   -9999.000000   -9999.000000
56675     56675     sichuan        102.5833       26.6500          133       130     2012      03        31        091              0.030333      17.426270       0.342955       0.180162   -9999.000000   -9999.000000   -9999.000000   -9999.000000
56675     56675     sichuan        102.5833       26.6500          133       130     2012      04        01        092              0.030625      13.195343       0.000000       0.202050   -9999.000000   -9999.000000   -9999.000000       0.018000
56675     56675     sichuan        102.5833       26.6500          133       130     2012      04        02        093              0.030625      17.290283       0.000000       0.190405       0.171500   -9999.000000       0.148200       0.200000
56675     56675     sichuan        102.5833       26.6500          133       130     2012      04        03        094              0.030417      19.872742       0.055652       0.178912       0.167500   -9999.000000       0.147300   -9999.000000
56675     56675     sichuan        102.5833       26.6500          133       130     2012      04        04        095              0.030375      20.324493       0.412922       0.170957       0.167500   -9999.000000       0.139700       0.158000
56675     56675     sichuan        102.5833       26.6500          133       130     2012      04        05        096              0.030333      20.838898       0.000000       0.167775   -9999.000000   -9999.000000   -9999.000000   -9999.000000
56675     56675     sichuan        102.5833       26.6500          133       130     2012      04        06        097              0.068208      19.788391       0.070485       0.162967   -9999.000000   -9999.000000   -9999.000000       0.055000
56675     56675     sichuan        102.5833       26.6500          133       130     2012      04        07        098              0.075292      20.027191       0.175113       0.158845       0.226000   -9999.000000       0.153900       0.050000
56675     56675     sichuan        102.5833       26.6500          133       130     2012      04        08        099              0.071333      16.234680       2.746915       0.162968       0.236000       0.113900       0.162500       0.250000
56675     56675     sichuan        102.5833       26.6500          133       130     2012      04        09        100              0.073458      14.420044       0.189948       0.185511       0.184000   -9999.000000       0.160100       0.039000
56675     56675     sichuan        102.5833       26.6500          133       130     2012      04        10        101              0.067250      17.978271       0.314718       0.193013       0.143000   -9999.000000       0.148500   -9999.000000
56675     56675     sichuan        102.5833       26.6500          133       130     2012      04        11        102              0.061708      19.360321       0.035071       0.181924   -9999.000000   -9999.000000   -9999.000000       0.025000
56675     56675     sichuan        102.5833       26.6500          133       130     2012      04        12        103              0.056833      20.585968       0.479872       0.171994       0.204000   -9999.000000   -9999.000000   -9999.000000
56675     56675     sichuan        102.5833       26.6500          133       130     2012      04        13        104              0.053125      19.742279       0.000000       0.167309       0.188500       0.069200       0.157100       0.046000
56675     56675     sichuan        102.5833       26.6500          133       130     2012      04        14        105              0.050292      20.251373       0.000000       0.162969       0.173500   -9999.000000       0.158100       0.114000
56675     56675     sichuan        102.5833       26.6500          133       130     2012      04        15        106              0.047958      22.433777       0.000000       0.153282       0.156000       0.040500       0.147800   -9999.000000
56675     56675     sichuan        102.5833       26.6500          133       130     2012      04        16        107              0.045167      23.400116       0.000000       0.145718   -9999.000000       0.068100   -9999.000000       0.015000
56675     56675     sichuan        102.5833       26.6500          133       130     2012      04        17        108              0.043375      21.670288       0.000000       0.143393   -9999.000000   -9999.000000   -9999.000000   -9999.000000
56675     56675     sichuan        102.5833       26.6500          133       130     2012      04        18        109              0.041750      21.919434       0.000000       0.141312       0.185500   -9999.000000   -9999.000000       0.006000
56675     56675     sichuan        102.5833       26.6500          133       130     2012      04        19        110              0.040208      21.871918       1.895740       0.139788       0.189000   -9999.000000       0.104800       0.110000
56675     56675     sichuan        102.5833       26.6500          133       130     2012      04        20        111              0.039625      20.492157       0.511534       0.158480       0.178500       0.035600       0.112500   -9999.000000
56675     56675     sichuan        102.5833       26.6500          133       130     2012      04        21        112              0.039250      20.864136       1.807471       0.163911   -9999.000000   -9999.000000       0.086800       0.291000
56675     56675     sichuan        102.5833       26.6500          133       130     2012      04        22        113              0.038125      20.581696       0.672607       0.174313   -9999.000000   -9999.000000   -9999.000000   -9999.000000
56675     56675     sichuan        102.5833       26.6500          133       130     2012      04        23        114              0.037625      19.549011       0.000000       0.178068       0.153500   -9999.000000   -9999.000000       0.102000
56675     56675     sichuan        102.5833       26.6500          133       130     2012      04        24        115              0.036417      22.250122       0.000000       0.162295       0.160500   -9999.000000       0.137900   -9999.000000
56675     56675     sichuan        102.5833       26.6500          133       130     2012      04        25        116              0.000000      23.064117       1.140430       0.147426       0.175500   -9999.000000       0.150700       0.332000
56675     56675     sichuan        102.5833       26.6500          133       130     2012      04        26        117              0.038375      19.533569       0.070312       0.154207       0.150000   -9999.000000       0.144600       0.206000
56675     56675     sichuan        102.5833       26.6500          133       130     2012      04        27        118              0.038417      19.630493       0.000000       0.156037   -9999.000000   -9999.000000       0.130000   -9999.000000
56675     56675     sichuan        102.5833       26.6500          133       130     2012      04        28        119              0.037783      22.064301       0.208138       0.148033       0.171000       0.052900   -9999.000000       0.102000
56675     56675     sichuan        102.5833       26.6500          133       130     2012      04        29        120              0.037125      21.816467       0.724316       0.142282       0.164000   -9999.000000   -9999.000000   -9999.000000
56675     56675     sichuan        102.5833       26.6500          133       130     2012      04        30        121              0.036750      21.526581       0.000000       0.143049       0.150500   -9999.000000       0.145300       0.108000
56675     56675     sichuan        102.5833       26.6500          133       130     2012      05        01        122              0.036000      23.654327       0.746789       0.138729       0.173000   -9999.000000       0.144900       0.080000
56675     56675     sichuan        102.5833       26.6500          133       130     2012      05        02        123              0.035042      24.379883       0.133169       0.133244   -9999.000000   -9999.000000       0.137200   -9999.000000
56675     56675     sichuan        102.5833       26.6500          133       130     2012      05        03        124              0.034292      24.381836       0.000000       0.130062       0.194000       0.128000   -9999.000000       0.239000
56675     56675     sichuan        102.5833       26.6500          133       130     2012      05        04        125              0.033458      25.109253       0.000000       0.127612       0.190500   -9999.000000   -9999.000000   -9999.000000
56675     56675     sichuan        102.5833       26.6500          133       130     2012      05        05        126              0.032833      25.604614       0.000000       0.125911       0.175000   -9999.000000   -9999.000000       0.221000
56675     56675     sichuan        102.5833       26.6500          133       130     2012      05        06        127              0.032292      26.169983       0.000000       0.124610       0.171000   -9999.000000       0.143500       0.062000
56675     56675     sichuan        102.5833       26.6500          133       130     2012      05        07        128              0.032292      23.773438       0.337901       0.125879   -9999.000000   -9999.000000       0.124800       0.043000
56675     56675     sichuan        102.5833       26.6500          133       130     2012      05        08        129              0.031750      24.058624       0.278647       0.128150   -9999.000000   -9999.000000       0.121900       0.126000
56675     56675     sichuan        102.5833       26.6500          133       130     2012      05        09        130              0.031750      23.054230       0.000000       0.129972       0.140000       0.164100   -9999.000000   -9999.000000
56675     56675     sichuan        102.5833       26.6500          133       130     2012      05        10        131              0.031375      24.790070       0.000000       0.128251       0.180000   -9999.000000   -9999.000000       0.135000
56675     56675     sichuan        102.5833       26.6500          133       130     2012      05        11        132              0.030958      26.399139       0.000000       0.125646       0.180000   -9999.000000       0.126000   -9999.000000
56675     56675     sichuan        102.5833       26.6500          133       130     2012      05        12        133              0.030458      27.688141       0.000000       0.123252   -9999.000000   -9999.000000       0.129700       0.147000
56675     56675     sichuan        102.5833       26.6500          133       130     2012      05        13        134              0.030417      25.996796       0.000000       0.122868   -9999.000000   -9999.000000       0.129100       0.167000
56675     56675     sichuan        102.5833       26.6500          133       130     2012      05        14        135              0.030083      26.106110       0.108903       0.122393       0.223000   -9999.000000       0.119400   -9999.000000
56675     56675     sichuan        102.5833       26.6500          133       130     2012      05        15        136              0.030000      21.775055       0.000000       0.124334       0.205000   -9999.000000   -9999.000000       0.007000
56675     56675     sichuan        102.5833       26.6500          133       130     2012      05        16        137              0.030042      21.859833       0.000000       0.124875       0.199500       0.041000   -9999.000000   -9999.000000
56675     56675     sichuan        102.5833       26.6500          133       130     2012      05        17        138              0.029792      24.881012       0.000000       0.123388       0.182000   -9999.000000       0.116500       0.216000
56675     56675     sichuan        102.5833       26.6500          133       130     2012      05        18        139              0.029625      25.939117       1.035347       0.121648   -9999.000000   -9999.000000       0.116300       0.268000
56675     56675     sichuan        102.5833       26.6500          133       130     2012      05        19        140              0.029458      27.382324       0.282408       0.119604       0.205000       0.042100       0.111200   -9999.000000
56675     56675     sichuan        102.5833       26.6500          133       130     2012      05        20        141              0.029208      26.813782       0.000000       0.119780       0.191000   -9999.000000   -9999.000000       0.117000
56675     56675     sichuan        102.5833       26.6500          133       130     2012      05        21        142              0.029083      28.913727      31.950146       0.118092       0.148500       0.043300   -9999.000000   -9999.000000
56675     56675     sichuan        102.5833       26.6500          133       130     2012      05        22        143              0.028792      29.594757       0.000000       0.116529       0.147000   -9999.000000   -9999.000000       0.243000
56675     56675     sichuan        102.5833       26.6500          133       130     2012      05        23        144              0.028833      27.894623       0.000000       0.116561   -9999.000000   -9999.000000       0.108200   -9999.000000
56675     56675     sichuan        102.5833       26.6500          133       130     2012      05        24        145              0.028625      28.288696      17.650057       0.115943   -9999.000000   -9999.000000       0.128000       0.281000
56675     56675     sichuan        102.5833       26.6500          133       130     2012      05        25        146              0.000000      26.357574      30.546759       0.164759       0.212000   -9999.000000       0.120000       0.683000
56675     56675     sichuan        102.5833       26.6500          133       130     2012      05        26        147              0.070042      20.024078       1.150656       0.291865       0.207500       0.076800   -9999.000000   -9999.000000
56675     56675     sichuan        102.5833       26.6500          133       130     2012      05        27        148              0.063208      19.167755       4.561641       0.283881       0.166000       0.269000   -9999.000000       0.614000
56675     56675     sichuan        102.5833       26.6500          133       130     2012      05        28        149              0.057375      21.687653       5.268450       0.265104   -9999.000000   -9999.000000   -9999.000000   -9999.000000
56675     56675     sichuan        102.5833       26.6500          133       130     2012      05        29        150              0.076625      22.055939       6.484369       0.270416   -9999.000000       0.318300       0.125100   -9999.000000
56675     56675     sichuan        102.5833       26.6500          133       130     2012      05        30        151              0.070667      19.506683       0.404078       0.281880       0.192500   -9999.000000       0.124700   -9999.000000
56675     56675     sichuan        102.5833       26.6500          133       130     2012      05        31        152              0.064792      19.480591       5.509945       0.259043       0.224000   -9999.000000   -9999.000000   -9999.000000
56675     56675     sichuan        102.5833       26.6500          133       130     2012      06        01        153              0.156292      17.833710      10.965982       0.264189       0.261000   -9999.000000   -9999.000000       0.877000
56675     56675     sichuan        102.5833       26.6500          133       130     2012      06        02        154              0.166458      17.142670       5.521217       0.295242   -9999.000000   -9999.000000   -9999.000000   -9999.000000
56675     56675     sichuan        102.5833       26.6500          133       130     2012      06        03        155              0.200458      17.374207      32.948647       0.287212   -9999.000000       0.091100   -9999.000000       1.000000
56675     56675     sichuan        102.5833       26.6500          133       130     2012      06        04        156              0.203292      18.299377       1.568444       0.318862       0.251000   -9999.000000       0.133200       0.873000
56675     56675     sichuan        102.5833       26.6500          133       130     2012      06        05        157              0.181250      19.938049       0.082358       0.302963       0.212000   -9999.000000       0.123700       0.652000
56675     56675     sichuan        102.5833       26.6500          133       130     2012      06        06        158              0.158652      21.970703       0.000000       0.281888       0.184000       0.051400   -9999.000000       0.598000
56675     56675     sichuan        102.5833       26.6500          133       130     2012      06        07        159              0.147130      22.767792       3.063126       0.269822       0.160000   -9999.000000   -9999.000000   -9999.000000
56675     56675     sichuan        102.5833       26.6500          133       130     2012      06        08        160              0.183250      23.127472       7.905843       0.267156   -9999.000000       0.050200   -9999.000000       0.439000
56675     56675     sichuan        102.5833       26.6500          133       130     2012      06        09        161              0.166125      21.772858       0.040741       0.288624       0.215000       0.212100       0.125700   -9999.000000
56675     56675     sichuan        102.5833       26.6500          133       130     2012      06        10        162              0.143208      23.029510       1.761535       0.271592       0.214500   -9999.000000       0.130500       0.588000
56675     56675     sichuan        102.5833       26.6500          133       130     2012      06        11        163              0.000000      22.479828       6.081436       0.265847       0.190500       0.182900       0.056200       0.700000
56675     56675     sichuan        102.5833       26.6500          133       130     2012      06        12        164              0.214875      19.919098       7.534558       0.273474       0.168000   -9999.000000   -9999.000000   -9999.000000
56675     56675     sichuan        102.5833       26.6500          133       130     2012      06        13        165              0.216292      19.170410      11.778505       0.287743   -9999.000000       0.094800   -9999.000000       0.691000
56675     56675     sichuan        102.5833       26.6500          133       130     2012      06        14        166              0.218292      20.980042       2.335552       0.293415   -9999.000000   -9999.000000       0.062000   -9999.000000
56675     56675     sichuan        102.5833       26.6500          133       130     2012      06        15        167              0.194667      19.039886       0.904077       0.293508       0.183500   -9999.000000       0.062500       0.738000
56675     56675     sichuan        102.5833       26.6500          133       130     2012      06        16        168              0.210875      18.964844       6.896581       0.278969       0.203000       0.333200       0.063400       0.847000
56675     56675     sichuan        102.5833       26.6500          133       130     2012      06        17        169              0.215833      17.526672       2.245172       0.292596       0.197500   -9999.000000   -9999.000000   -9999.000000
56675     56675     sichuan        102.5833       26.6500          133       130     2012      06        18        170              0.231375      17.780334      31.112892       0.284111   -9999.000000   -9999.000000   -9999.000000       0.892000
56675     56675     sichuan        102.5833       26.6500          133       130     2012      06        19        171              0.227542      19.959412       0.367988       0.304851   -9999.000000   -9999.000000   -9999.000000   -9999.000000
56675     56675     sichuan        102.5833       26.6500          133       130     2012      06        20        172              0.214167      19.893250      22.321302       0.306016       0.164000   -9999.000000       0.056100       0.896000
56675     56675     sichuan        102.5833       26.6500          133       130     2012      06        21        173              0.241333      19.941498      19.993738       0.304046       0.220000       0.074900       0.052800   -9999.000000
56675     56675     sichuan        102.5833       26.6500          133       130     2012      06        22        174              0.238292      18.892090       0.913691       0.325165       0.191000   -9999.000000       0.052000       0.917000
56675     56675     sichuan        102.5833       26.6500          133       130     2012      06        23        175              0.248458      19.334717      45.820194       0.303685   -9999.000000   -9999.000000   -9999.000000       0.988000
56675     56675     sichuan        102.5833       26.6500          133       130     2012      06        24        176              0.247375      20.535278       6.161329       0.349349   -9999.000000       0.270400   -9999.000000   -9999.000000
56675     56675     sichuan        102.5833       26.6500          133       130     2012      06        25        177              0.225542      19.634491       1.851263       0.318322       0.203000   -9999.000000   -9999.000000       0.822000
56675     56675     sichuan        102.5833       26.6500          133       130     2012      06        26        178              0.230583      20.306641       9.853886       0.298427       0.186000       0.077000       0.068400   -9999.000000
56675     56675     sichuan        102.5833       26.6500          133       130     2012      06        27        179              0.240875      20.977142       9.038610       0.302345       0.177000       0.099200       0.057500       0.770000
56675     56675     sichuan        102.5833       26.6500          133       130     2012      06        28        180              0.224333      21.570709      10.933630       0.303776       0.175000   -9999.000000       0.062100       0.867000
56675     56675     sichuan        102.5833       26.6500          133       130     2012      06        29        181              0.206833      21.701263      39.443535       0.306318   -9999.000000       0.210400   -9999.000000   -9999.000000
56675     56675     sichuan        102.5833       26.6500          133       130     2012      06        30        182              0.231292      22.371735       9.872295       0.325064       0.189000   -9999.000000   -9999.000000   -9999.000000
56675     56675     sichuan        102.5833       26.6500          133       130     2012      07        01        183              0.210083      21.558655       6.495400       0.319295   -9999.000000       0.168300       0.062200   -9999.000000
56675     56675     sichuan        102.5833       26.6500          133       130     2012      07        02        184              0.186375      22.292908       0.285755       0.308266       0.126000       0.245600       0.084100       0.703000
56675     56675     sichuan        102.5833       26.6500          133       130     2012      07        03        185              0.173000      21.927521       1.988394       0.292101   -9999.000000   -9999.000000       0.082100       0.713000
56675     56675     sichuan        102.5833       26.6500          133       130     2012      07        04        186              0.177250      20.718628      42.685299       0.290032   -9999.000000       0.174700   -9999.000000       0.962000
56675     56675     sichuan        102.5833       26.6500          133       130     2012      07        05        187              0.238333      19.707489      10.822510       0.324229   -9999.000000   -9999.000000   -9999.000000       0.872000
56675     56675     sichuan        102.5833       26.6500          133       130     2012      07        06        188              0.223500      19.699219       1.031086       0.323018   -9999.000000   -9999.000000   -9999.000000   -9999.000000
56675     56675     sichuan        102.5833       26.6500          133       130     2012      07        07        189              0.206208      20.499115       0.072494       0.304973   -9999.000000       0.256400       0.083400       0.769000
56675     56675     sichuan        102.5833       26.6500          133       130     2012      07        08        190              0.188250      21.723297       0.000000       0.295373       0.122000   -9999.000000       0.082900   -9999.000000
56675     56675     sichuan        102.5833       26.6500          133       130     2012      07        09        191              0.173958      22.574432       0.266919       0.289544   -9999.000000       0.183000       0.051800       0.712000
56675     56675     sichuan        102.5833       26.6500          133       130     2012      07        10        192              0.162625      21.701355       0.266064       0.287493   -9999.000000   -9999.000000   -9999.000000       0.613000
56675     56675     sichuan        102.5833       26.6500          133       130     2012      07        11        193              0.148750      21.438049       3.528328       0.286596   -9999.000000   -9999.000000   -9999.000000   -9999.000000
56675     56675     sichuan        102.5833       26.6500          133       130     2012      07        12        194              0.183000      21.594940      38.536793       0.289273       0.253000       0.257900       0.052400       1.000000
56675     56675     sichuan        102.5833       26.6500          133       130     2012      07        13        195              0.235167      20.741455       8.251747       0.317539       0.222000   -9999.000000       0.056600   -9999.000000
56675     56675     sichuan        102.5833       26.6500          133       130     2012      07        14        196              0.221625      20.140350      19.931581       0.319278       0.201000       0.121100       0.052900       0.822000
56675     56675     sichuan        102.5833       26.6500          133       130     2012      07        15        197              0.247833      22.298370      30.920784       0.317649   -9999.000000       0.170300       0.053500       0.992000
56675     56675     sichuan        102.5833       26.6500          133       130     2012      07        16        198              0.255458      20.708405      22.365761       0.339442       0.247000   -9999.000000   -9999.000000   -9999.000000
56675     56675     sichuan        102.5833       26.6500          133       130     2012      07        17        199              0.236000      19.595703       0.409722       0.346305       0.229500       0.276200   -9999.000000       0.877000
56675     56675     sichuan        102.5833       26.6500          133       130     2012      07        18        200              0.218000      20.520966       0.129099       0.325948       0.214000   -9999.000000       0.045600   -9999.000000
56675     56675     sichuan        102.5833       26.6500          133       130     2012      07        19        201              0.205500      21.363708       1.335469       0.312990       0.208000       0.140600       0.045700       0.865000
56675     56675     sichuan        102.5833       26.6500          133       130     2012      07        20        202              0.215500      21.341980       2.507000       0.308035   -9999.000000       0.164000       0.045100   -9999.000000
56675     56675     sichuan        102.5833       26.6500          133       130     2012      07        21        203              0.212000      21.132385       4.528979       0.306898   -9999.000000   -9999.000000   -9999.000000       0.740000
56675     56675     sichuan        102.5833       26.6500          133       130     2012      07        22        204              0.253792      21.404907      33.782982       0.303225       0.371000       0.188000   -9999.000000       1.000000
56675     56675     sichuan        102.5833       26.6500          133       130     2012      07        23        205              0.232083      19.283051       0.318339       0.333711       0.297000   -9999.000000   -9999.000000   -9999.000000
56675     56675     sichuan        102.5833       26.6500          133       130     2012      07        24        206              0.214583      19.735046       0.706166       0.310982       0.289000   -9999.000000       0.035700       0.779000
56675     56675     sichuan        102.5833       26.6500          133       130     2012      07        25        207              0.290208      21.307678       0.883183       0.305883   -9999.000000   -9999.000000       0.036500   -9999.000000
56675     56675     sichuan        102.5833       26.6500          133       130     2012      07        26        208              0.319958      20.441986       0.071959       0.303247   -9999.000000   -9999.000000       0.032800       0.604000
56675     56675     sichuan        102.5833       26.6500          133       130     2012      07        27        209              0.318458      21.926147      50.820843       0.296823   -9999.000000       0.051100   -9999.000000       0.785000
56675     56675     sichuan        102.5833       26.6500          133       130     2012      07        28        210              0.355292      21.807281       7.689164       0.324273       0.298000   -9999.000000   -9999.000000   -9999.000000
56675     56675     sichuan        102.5833       26.6500          133       130     2012      07        29        211              0.342000      20.163055       1.526421       0.329858       0.278000   -9999.000000       0.035400       0.659000
56675     56675     sichuan        102.5833       26.6500          133       130     2012      07        30        212              0.331958      21.395782       4.048304       0.317891       0.260000       0.194800       0.054700   -9999.000000
56675     56675     sichuan        102.5833       26.6500          133       130     2012      07        31        213              0.328292      22.679138      14.326564       0.311543   -9999.000000   -9999.000000       0.054900       1.000000
56675     56675     sichuan        102.5833       26.6500          133       130     2012      08        01        214              0.331417      21.098236       0.425445       0.320888   -9999.000000       0.120700   -9999.000000       0.760000
56675     56675     sichuan        102.5833       26.6500          133       130     2012      08        02        215              0.340458      20.000885       4.247055       0.310262       0.366000       0.066300   -9999.000000       0.732000
56675     56675     sichuan        102.5833       26.6500          133       130     2012      08        03        216              0.342333      20.817291       0.559748       0.309159       0.323500   -9999.000000   -9999.000000       0.607000
56675     56675     sichuan        102.5833       26.6500          133       130     2012      08        04        217              0.330458      20.746429      12.583389       0.303983       0.330500       0.235500       0.052200   -9999.000000
56675     56675     sichuan        102.5833       26.6500          133       130     2012      08        05        218              0.316750      22.221924       1.757132       0.309082   -9999.000000   -9999.000000       0.052500       0.653000
56675     56675     sichuan        102.5833       26.6500          133       130     2012      08        06        219              0.307208      22.306915      15.317655       0.304511   -9999.000000       0.269000       0.080000   -9999.000000
56675     56675     sichuan        102.5833       26.6500          133       130     2012      08        07        220              0.301583      21.083221       1.487450       0.316774       0.359000       0.169900   -9999.000000       0.640000
56675     56675     sichuan        102.5833       26.6500          133       130     2012      08        08        221              0.298500      21.154053       0.000000       0.305054       0.322500   -9999.000000   -9999.000000       0.645000
56675     56675     sichuan        102.5833       26.6500          133       130     2012      08        09        222              0.292083      22.270935       0.118979       0.297498       0.289500       0.092800   -9999.000000   -9999.000000
56675     56675     sichuan        102.5833       26.6500          133       130     2012      08        10        223              0.288083      22.291077       0.000000       0.292682       0.274000   -9999.000000       0.088300       0.509000
56675     56675     sichuan        102.5833       26.6500          133       130     2012      08        11        224              0.284292      21.869659       0.000000       0.289500   -9999.000000   -9999.000000       0.088000   -9999.000000
56675     56675     sichuan        102.5833       26.6500          133       130     2012      08        12        225              0.281958      22.798279       0.424921       0.286642   -9999.000000       0.093000       0.081600       0.477000
56675     56675     sichuan        102.5833       26.6500          133       130     2012      08        13        226              0.281917      23.518707       9.728192       0.285476       0.267000   -9999.000000   -9999.000000       0.542000
56675     56675     sichuan        102.5833       26.6500          133       130     2012      08        14        227              0.289625      22.696503      27.928337       0.301274   -9999.000000       0.327400   -9999.000000   -9999.000000
56675     56675     sichuan        102.5833       26.6500          133       130     2012      08        15        228              0.324500      22.326141       6.008259       0.314142       0.238000   -9999.000000       0.084400       0.644000
56675     56675     sichuan        102.5833       26.6500          133       130     2012      08        16        229              0.305583      21.945190       0.384512       0.315901   -9999.000000   -9999.000000       0.085800   -9999.000000
56675     56675     sichuan        102.5833       26.6500          133       130     2012      08        17        230              0.291875      22.194885       0.796912       0.299730   -9999.000000       0.331700       0.084500       0.631000
56675     56675     sichuan        102.5833       26.6500          133       130     2012      08        18        231              0.276833      22.723755       0.566852       0.294239       0.250000   -9999.000000   -9999.000000   -9999.000000
56675     56675     sichuan        102.5833       26.6500          133       130     2012      08        19        232              0.273833      21.680542       2.258679       0.292071       0.265500       0.119300   -9999.000000       0.824000
56675     56675     sichuan        102.5833       26.6500          133       130     2012      08        20        233              0.276917      20.521698       2.949861       0.294774       0.264500       0.125000   -9999.000000       0.744000
56675     56675     sichuan        102.5833       26.6500          133       130     2012      08        21        234              0.297375      20.540100       0.068478       0.293747       0.221000   -9999.000000       0.072500   -9999.000000
56675     56675     sichuan        102.5833       26.6500          133       130     2012      08        22        235              0.281542      20.473083       0.000000       0.291885   -9999.000000       0.252200       0.075400   -9999.000000
56675     56675     sichuan        102.5833       26.6500          133       130     2012      08        23        236              0.273958      18.903351       0.000000       0.288515       0.242000   -9999.000000       0.072400   -9999.000000
56675     56675     sichuan        102.5833       26.6500          133       130     2012      08        24        237              0.278417      18.407349      30.667377       0.288182       0.259000       0.055200   -9999.000000   -9999.000000
56675     56675     sichuan        102.5833       26.6500          133       130     2012      08        25        238              0.000000      18.721924      10.545405       0.306776       0.227000   -9999.000000   -9999.000000   -9999.000000
56675     56675     sichuan        102.5833       26.6500          133       130     2012      08        26        239              0.329125      18.807953       3.748664       0.320012       0.218000   -9999.000000   -9999.000000   -9999.000000
56675     56675     sichuan        102.5833       26.6500          133       130     2012      08        27        240              0.318042      19.337982       4.796372       0.305990   -9999.000000       0.113100       0.059800       0.668000
56675     56675     sichuan        102.5833       26.6500          133       130     2012      08        28        241              0.317042      20.297607      18.291973       0.303661   -9999.000000   -9999.000000       0.054700   -9999.000000
56675     56675     sichuan        102.5833       26.6500          133       130     2012      08        29        242              0.307792      21.086975      13.983315       0.315493       0.268000       0.154900       0.057000       0.779000
56675     56675     sichuan        102.5833       26.6500          133       130     2012      08        30        243              0.308958      20.068787       1.069902       0.324069       0.237000       0.189500   -9999.000000       0.743000
56675     56675     sichuan        102.5833       26.6500          133       130     2012      08        31        244              0.295042      21.400940       4.562139       0.308605       0.218000   -9999.000000   -9999.000000       0.588000
56675     56675     sichuan        102.5833       26.6500          133       130     2012      09        01        245              0.284208      21.155243      25.918249       0.309184   -9999.000000       0.268300       0.060200       0.656000
56675     56675     sichuan        102.5833       26.6500          133       130     2012      09        02        246              0.295958      20.971497       0.327957       0.318642   -9999.000000   -9999.000000       0.060000   -9999.000000
56675     56675     sichuan        102.5833       26.6500          133       130     2012      09        03        247              0.289542      17.033051       0.000000       0.315331       0.254000   -9999.000000       0.046000       0.574000
56675     56675     sichuan        102.5833       26.6500          133       130     2012      09        04        248              0.276583      18.781891       0.084067       0.306305       0.260000       0.152300   -9999.000000   -9999.000000
56675     56675     sichuan        102.5833       26.6500          133       130     2012      09        05        249              0.270542      18.786530       0.420941       0.302573       0.238500   -9999.000000   -9999.000000       0.565000
56675     56675     sichuan        102.5833       26.6500          133       130     2012      09        06        250              0.268500      19.112213       0.101636       0.298967       0.200000       0.309900   -9999.000000       0.553000
56675     56675     sichuan        102.5833       26.6500          133       130     2012      09        07        251              0.266792      19.811493       0.000000       0.295097   -9999.000000       0.267800       0.046600   -9999.000000
56675     56675     sichuan        102.5833       26.6500          133       130     2012      09        08        252              0.264250      20.021423       0.000000       0.291838   -9999.000000   -9999.000000       0.048500       0.480000
56675     56675     sichuan        102.5833       26.6500          133       130     2012      09        09        253              0.262833      20.598633       0.000000       0.289599       0.239000       0.135400       0.045200   -9999.000000
56675     56675     sichuan        102.5833       26.6500          133       130     2012      09        10        254              0.262792      21.060028      11.903108       0.288060       0.224000   -9999.000000   -9999.000000       0.531000
56675     56675     sichuan        102.5833       26.6500          133       130     2012      09        11        255              0.328083      21.167664      50.198414       0.296387   -9999.000000       0.234600   -9999.000000       0.963000
56675     56675     sichuan        102.5833       26.6500          133       130     2012      09        12        256              0.358875      18.847870      27.596161       0.343091   -9999.000000       0.301600       0.042100   -9999.000000
56675     56675     sichuan        102.5833       26.6500          133       130     2012      09        13        257              0.345750      16.307922       1.843486       0.340935   -9999.000000   -9999.000000       0.041700       0.616000
56675     56675     sichuan        102.5833       26.6500          133       130     2012      09        14        258              0.332667      15.897766       0.751593       0.326088       0.230000       0.154100       0.042600   -9999.000000
56675     56675     sichuan        102.5833       26.6500          133       130     2012      09        15        259              0.317833      16.711487       2.851080       0.313686       0.259500   -9999.000000       0.041600       0.803000
56675     56675     sichuan        102.5833       26.6500          133       130     2012      09        16        260              0.321125      15.848877       3.915808       0.311172       0.281000       0.183100   -9999.000000   -9999.000000
56675     56675     sichuan        102.5833       26.6500          133       130     2012      09        17        261              0.349625      15.813843       5.594233       0.311517       0.276000       0.244800   -9999.000000       0.947000
56675     56675     sichuan        102.5833       26.6500          133       130     2012      09        18        262              0.354250      16.218353      48.458305       0.311934   -9999.000000   -9999.000000       0.055800       0.827000
56675     56675     sichuan        102.5833       26.6500          133       130     2012      09        19        263              0.350583      16.279938       1.411402       0.334199       0.294000       0.272600       0.053000   -9999.000000
56675     56675     sichuan        102.5833       26.6500          133       130     2012      09        20        264              0.346583      15.898315       0.116579       0.330123       0.248500   -9999.000000       0.051300       0.808000
56675     56675     sichuan        102.5833       26.6500          133       130     2012      09        21        265              0.342333      17.434052       3.261076       0.317667   -9999.000000   -9999.000000   -9999.000000   -9999.000000
56675     56675     sichuan        102.5833       26.6500          133       130     2012      09        22        266              0.342958      17.797791       0.221995       0.313153       0.140000       0.294500   -9999.000000       0.728000
56675     56675     sichuan        102.5833       26.6500          133       130     2012      09        23        267              0.335000      18.333069       2.907747       0.307768   -9999.000000   -9999.000000   -9999.000000       0.756000
56675     56675     sichuan        102.5833       26.6500          133       130     2012      09        24        268              0.314958      18.970306       1.185974       0.305859   -9999.000000       0.125900       0.039900   -9999.000000
56675     56675     sichuan        102.5833       26.6500          133       130     2012      09        25        269              0.281167      19.449493       4.051449       0.299344       0.121000   -9999.000000       0.034500       0.681000
56675     56675     sichuan        102.5833       26.6500          133       130     2012      09        26        270              0.258792      19.668579      12.748847       0.298301       0.131000   -9999.000000       0.037300   -9999.000000
56675     56675     sichuan        102.5833       26.6500          133       130     2012      09        27        271              0.253929      19.216705      16.608027       0.311927       0.150000       0.234200   -9999.000000       0.704000
56675     56675     sichuan        102.5833       26.6500          133       130     2012      09        28        272              0.284600      18.424896      18.286358       0.320119   -9999.000000   -9999.000000   -9999.000000       0.956000
56675     56675     sichuan        102.5833       26.6500          133       130     2012      09        29        273              0.287500      16.919464       9.437511       0.326045   -9999.000000       0.134400       0.039400       0.689000
56675     56675     sichuan        102.5833       26.6500          133       130     2012      09        30        274              0.344500      16.417480      14.526399       0.316604       0.156000   -9999.000000       0.042400       0.664000
56675     56675     sichuan        102.5833       26.6500          133       130     2012      10        01        275              0.344917      16.261658       1.323338       0.327107       0.203000   -9999.000000       0.043800   -9999.000000
56675     56675     sichuan        102.5833       26.6500          133       130     2012      10        02        276              0.346125      16.227234       4.750413       0.314604       0.195500       0.129000       0.038900       0.769000
56675     56675     sichuan        102.5833       26.6500          133       130     2012      10        03        277              0.353167      17.079803       7.888206       0.313461       0.203000   -9999.000000   -9999.000000   -9999.000000
56675     56675     sichuan        102.5833       26.6500          133       130     2012      10        04        278              0.349833      15.932678      17.087814       0.316807   -9999.000000       0.131500   -9999.000000       1.000000
56675     56675     sichuan        102.5833       26.6500          133       130     2012      10        05        279              0.352667      16.077850      10.496970       0.322770   -9999.000000   -9999.000000       0.042100       1.000000
56675     56675     sichuan        102.5833       26.6500          133       130     2012      10        06        280              0.352708      15.722748       2.201527       0.322840       0.222500   -9999.000000       0.043000   -9999.000000
56675     56675     sichuan        102.5833       26.6500          133       130     2012      10        07        281              0.352375      15.562439       0.395413       0.316414       0.199000       0.162400       0.039100       0.717000
56675     56675     sichuan        102.5833       26.6500          133       130     2012      10        08        282              0.348417      17.004944       0.049247       0.309392       0.179000   -9999.000000   -9999.000000   -9999.000000
56675     56675     sichuan        102.5833       26.6500          133       130     2012      10        09        283              0.354417      17.684631      15.134903       0.304461   -9999.000000   -9999.000000   -9999.000000       0.767000
56675     56675     sichuan        102.5833       26.6500          133       130     2012      10        10        284              0.354875      15.555817       2.195163       0.317088   -9999.000000   -9999.000000   -9999.000000       0.917000
56675     56675     sichuan        102.5833       26.6500          133       130     2012      10        11        285              0.347708      15.644531       0.056856       0.311786       0.259000   -9999.000000       0.060400   -9999.000000
56675     56675     sichuan        102.5833       26.6500          133       130     2012      10        12        286              0.342625      16.638123       0.927011       0.303488       0.264500       0.112700       0.059900       0.719000
56675     56675     sichuan        102.5833       26.6500          133       130     2012      10        13        287              0.340042      16.069550       0.084037       0.300982       0.227500   -9999.000000       0.056400   -9999.000000
56675     56675     sichuan        102.5833       26.6500          133       130     2012      10        14        288              0.309125      16.923737       1.059643       0.296262       0.209000   -9999.000000   -9999.000000       0.633000
56675     56675     sichuan        102.5833       26.6500          133       130     2012      10        15        289              0.256042      17.202576       0.000000       0.292420   -9999.000000       0.137100   -9999.000000   -9999.000000
56675     56675     sichuan        102.5833       26.6500          133       130     2012      10        16        290              0.222542      17.333588       0.000000       0.290104       0.238000   -9999.000000       0.117800       0.461000
56675     56675     sichuan        102.5833       26.6500          133       130     2012      10        17        291              0.204750      17.067017       0.000000       0.289197       0.244000       0.138100       0.118200       0.545000
56675     56675     sichuan        102.5833       26.6500          133       130     2012      10        18        292              0.187250      15.560364       0.000000       0.289341       0.223500       0.181400       0.114300   -9999.000000
56675     56675     sichuan        102.5833       26.6500          133       130     2012      10        19        293              0.173917      15.967957       0.000000       0.287359       0.212500   -9999.000000   -9999.000000       0.505000
56675     56675     sichuan        102.5833       26.6500          133       130     2012      10        20        294              0.165958      16.292877       0.000000       0.285479   -9999.000000       0.088800   -9999.000000   -9999.000000
56675     56675     sichuan        102.5833       26.6500          133       130     2012      10        21        295              0.160958      16.218475       0.236549       0.283988   -9999.000000   -9999.000000   -9999.000000       0.448000
56675     56675     sichuan        102.5833       26.6500          133       130     2012      10        22        296              0.160542      15.646545       0.033151       0.283011   -9999.000000       0.064400       0.123100       0.502000
56675     56675     sichuan        102.5833       26.6500          133       130     2012      10        23        297              0.160292      15.040680       0.000000       0.282460   -9999.000000       0.077100       0.121000   -9999.000000
56675     56675     sichuan        102.5833       26.6500          133       130     2012      10        24        298              0.159667      15.145233       0.000000       0.280509   -9999.000000   -9999.000000       0.121300       0.396000
56675     56675     sichuan        102.5833       26.6500          133       130     2012      10        25        299              0.000000      15.567352       0.000000       0.278986       0.305000       0.223500   -9999.000000   -9999.000000
56675     56675     sichuan        102.5833       26.6500          133       130     2012      10        26        300              0.159042      15.386963       0.000000       0.277605   -9999.000000   -9999.000000   -9999.000000       0.355000
56675     56675     sichuan        102.5833       26.6500          133       130     2012      10        27        301              0.160250      15.157410       0.000000       0.275751       0.371000   -9999.000000   -9999.000000       0.386000
56675     56675     sichuan        102.5833       26.6500          133       130     2012      10        28        302              0.000000      15.330109       0.000000       0.274296       0.340000   -9999.000000       0.124400       0.238000
56675     56675     sichuan        102.5833       26.6500          133       130     2012      10        29        303              0.163958      15.098724       3.913760       0.273681       0.352500   -9999.000000       0.137600       0.346000
56675     56675     sichuan        102.5833       26.6500          133       130     2012      10        30        304              0.166000      15.953308       1.749270       0.272221       0.350000       0.048600       0.129700   -9999.000000
56675     56675     sichuan        102.5833       26.6500          133       130     2012      10        31        305              0.167500      13.169952       0.000000       0.277430   -9999.000000   -9999.000000   -9999.000000       0.252000
56675     56675     sichuan        102.5833       26.6500          133       130     2012      11        01        306              0.166542      12.865540       0.000000       0.273822   -9999.000000   -9999.000000   -9999.000000   -9999.000000
56675     56675     sichuan        102.5833       26.6500          133       130     2012      11        02        307              0.165250      13.827362       0.000000       0.271391       0.325500       0.046200       0.127000       0.233000
56675     56675     sichuan        102.5833       26.6500          133       130     2012      11        03        308              0.168583      13.758484       0.124810       0.269248       0.324000   -9999.000000       0.133000       0.402000
56675     56675     sichuan        102.5833       26.6500          133       130     2012      11        04        309              0.173583      13.992004       0.026894       0.267971       0.327500       0.047300       0.131700   -9999.000000
56675     56675     sichuan        102.5833       26.6500          133       130     2012      11        05        310              0.173750      13.363220       0.000000       0.267685   -9999.000000       0.081400   -9999.000000       0.229000
56675     56675     sichuan        102.5833       26.6500          133       130     2012      11        06        311              0.174833      13.512360       0.000000       0.266700   -9999.000000   -9999.000000   -9999.000000   -9999.000000
56675     56675     sichuan        102.5833       26.6500          133       130     2012      11        07        312              0.174917      14.431946       0.000000       0.265868       0.360000       0.080800   -9999.000000       0.260000
56675     56675     sichuan        102.5833       26.6500          133       130     2012      11        08        313              0.173042      14.470306       0.000000       0.265395       0.338000   -9999.000000       0.165100       0.255000
56675     56675     sichuan        102.5833       26.6500          133       130     2012      11        09        314              0.170292      14.055786       0.556168       0.263478       0.312000       0.023500       0.166700   -9999.000000
56675     56675     sichuan        102.5833       26.6500          133       130     2012      11        10        315              0.169750      13.752747       0.000000       0.261599       0.307000       0.052400       0.160100       0.080000
56675     56675     sichuan        102.5833       26.6500          133       130     2012      11        11        316              0.171167      13.373230       0.000000       0.261844   -9999.000000   -9999.000000   -9999.000000   -9999.000000
56675     56675     sichuan        102.5833       26.6500          133       130     2012      11        12        317              0.172208      12.793518       0.162151       0.261838   -9999.000000       0.089000   -9999.000000       0.319000
56675     56675     sichuan        102.5833       26.6500          133       130     2012      11        13        318              0.000000      13.337311       1.125251       0.261315       0.349000   -9999.000000       0.155900   -9999.000000
56675     56675     sichuan        102.5833       26.6500          133       130     2012      11        14        319              0.170917      13.382294       0.491536       0.264968       0.334500   -9999.000000       0.157500       0.269000
56675     56675     sichuan        102.5833       26.6500          133       130     2012      11        15        320              0.170875      13.699249       0.102901       0.263680       0.335000   -9999.000000       0.157500       0.331000
56675     56675     sichuan        102.5833       26.6500          133       130     2012      11        16        321              0.169542      13.731873       0.000000       0.261803   -9999.000000   -9999.000000       0.151100   -9999.000000
56675     56675     sichuan        102.5833       26.6500          133       130     2012      11        17        322              0.000000      12.765656       0.000000       0.262001   -9999.000000       0.024300   -9999.000000       0.301000
56675     56675     sichuan        102.5833       26.6500          133       130     2012      11        18        323              0.168000      12.368195       0.000000       0.261720       0.326500   -9999.000000   -9999.000000   -9999.000000
56675     56675     sichuan        102.5833       26.6500          133       130     2012      11        19        324              0.167375      12.433960       0.000000       0.261618       0.353500   -9999.000000       0.178800       0.297000
56675     56675     sichuan        102.5833       26.6500          133       130     2012      11        20        325              0.168042      12.691620       0.000000       0.260543       0.342000       0.025500       0.173800       0.313000
56675     56675     sichuan        102.5833       26.6500          133       130     2012      11        21        326              0.167042      13.764099       5.534687       0.259171       0.320000   -9999.000000       0.170500   -9999.000000
56675     56675     sichuan        102.5833       26.6500          133       130     2012      11        22        327              0.165625      13.620758     114.925491       0.258523   -9999.000000   -9999.000000   -9999.000000       0.347000
56675     56675     sichuan        102.5833       26.6500          133       130     2012      11        23        328              0.164833      13.043396     142.461182       0.296072       0.364000       0.044400   -9999.000000   -9999.000000
56675     56675     sichuan        102.5833       26.6500          133       130     2012      11        24        329              0.164875      12.220062       2.237868       0.363836       0.350000   -9999.000000   -9999.000000       0.218000
56675     56675     sichuan        102.5833       26.6500          133       130     2012      11        25        330              0.167750      12.388031       0.000000       0.351866       0.347000       0.171600       0.177400       0.095000
56675     56675     sichuan        102.5833       26.6500          133       130     2012      11        26        331              0.166500      12.360016       0.615929       0.306071       0.324000   -9999.000000   -9999.000000       0.154000
56675     56675     sichuan        102.5833       26.6500          133       130     2012      11        27        332              0.165708      11.317535       0.000000       0.289726   -9999.000000   -9999.000000       0.180600       0.183000
56675     56675     sichuan        102.5833       26.6500          133       130     2012      11        28        333              0.164625      11.458282       4.278461       0.283561   -9999.000000   -9999.000000   -9999.000000   -9999.000000
56675     56675     sichuan        102.5833       26.6500          133       130     2012      11        29        334              0.164417      11.612335       0.136705       0.288134       0.350000   -9999.000000   -9999.000000       0.109000
56675     56675     sichuan        102.5833       26.6500          133       130     2012      11        30        335              0.164250      11.289551       0.000000       0.281764       0.345500       0.100000       0.187700   -9999.000000
56675     56675     sichuan        102.5833       26.6500          133       130     2012      12        01        336              0.162500      11.318695       0.000000       0.278120       0.327500   -9999.000000       0.188500       0.008000
56675     56675     sichuan        102.5833       26.6500          133       130     2012      12        02        337              0.160417      10.997498       0.282063       0.276069   -9999.000000   -9999.000000       0.186800       0.038000
56675     56675     sichuan        102.5833       26.6500          133       130     2012      12        03        338              0.159500      10.379791       4.771976       0.275287   -9999.000000   -9999.000000   -9999.000000   -9999.000000
56675     56675     sichuan        102.5833       26.6500          133       130     2012      12        04        339              0.159167      10.088684       0.000000       0.285208       0.366000   -9999.000000   -9999.000000       0.001000
56675     56675     sichuan        102.5833       26.6500          133       130     2012      12        05        340              0.159083      10.402802       0.000000       0.276748       0.336500       0.048900   -9999.000000   -9999.000000
56675     56675     sichuan        102.5833       26.6500          133       130     2012      12        06        341              0.160083       9.034119       0.056133       0.275640       0.330500   -9999.000000       0.169300       0.098000
56675     56675     sichuan        102.5833       26.6500          133       130     2012      12        07        342              0.159208       9.803619       0.000000       0.274991       0.323000   -9999.000000       0.170100       0.064000
56675     56675     sichuan        102.5833       26.6500          133       130     2012      12        08        343              0.160542       8.464630       0.000000       0.275728   -9999.000000       0.102200       0.164700   -9999.000000
56675     56675     sichuan        102.5833       26.6500          133       130     2012      12        09        344              0.161333       8.452301       2.341299       0.275694       0.335000   -9999.000000   -9999.000000       0.239000
56675     56675     sichuan        102.5833       26.6500          133       130     2012      12        10        345              0.160583       8.857605       0.000000       0.278525       0.351000       0.043900   -9999.000000   -9999.000000
56675     56675     sichuan        102.5833       26.6500          133       130     2012      12        11        346              0.158250       9.824921       0.722217       0.277525       0.266500   -9999.000000   -9999.000000       0.187000
56675     56675     sichuan        102.5833       26.6500          133       130     2012      12        12        347              0.159500       8.561951       0.000000       0.276267       0.267500   -9999.000000       0.163600   -9999.000000
56675     56675     sichuan        102.5833       26.6500          133       130     2012      12        13        348              0.159042      10.014832       0.000000       0.274055   -9999.000000       0.098900       0.163200       0.213000
56675     56675     sichuan        102.5833       26.6500          133       130     2012      12        14        349              0.157542      10.029480       0.000000       0.271096   -9999.000000   -9999.000000       0.156300       0.119000
56675     56675     sichuan        102.5833       26.6500          133       130     2012      12        15        350              0.000000       9.978516       0.000000       0.269953       0.257500       0.113400   -9999.000000   -9999.000000
56675     56675     sichuan        102.5833       26.6500          133       130     2012      12        16        351              0.155417       9.413239       0.000000       0.268995       0.282500   -9999.000000   -9999.000000       0.135000
56675     56675     sichuan        102.5833       26.6500          133       130     2012      12        17        352              0.155375       9.428986       0.000000       0.268147       0.280500   -9999.000000       0.164800   -9999.000000
56675     56675     sichuan        102.5833       26.6500          133       130     2012      12        18        353              0.155458       9.720551       0.000000       0.267210       0.256000       0.106800       0.170400       0.123000
56675     56675     sichuan        102.5833       26.6500          133       130     2012      12        19        354              0.151458       9.141754       0.000000       0.266840   -9999.000000   -9999.000000       0.161400       0.081000
56675     56675     sichuan        102.5833       26.6500          133       130     2012      12        20        355              0.000000      10.377991       0.121903       0.265700       0.295000   -9999.000000   -9999.000000   -9999.000000
56675     56675     sichuan        102.5833       26.6500          133       130     2012      12        21        356              0.149250      10.061646       0.000000       0.264397       0.434000   -9999.000000   -9999.000000       0.209000
56675     56675     sichuan        102.5833       26.6500          133       130     2012      12        22        357              0.148000       9.408600       0.075009       0.263210       0.423000   -9999.000000   -9999.000000   -9999.000000
56675     56675     sichuan        102.5833       26.6500          133       130     2012      12        23        358              0.146792       9.183624       0.000000       0.262986       0.386000       0.209300       0.167300       0.144000
56675     56675     sichuan        102.5833       26.6500          133       130     2012      12        24        359              0.147200       6.944580       0.000000       0.263363   -9999.000000   -9999.000000       0.170600       0.001000
56675     56675     sichuan        102.5833       26.6500          133       130     2012      12        25        360              0.147042       8.168152       0.000000       0.263062   -9999.000000   -9999.000000       0.165300   -9999.000000
56675     56675     sichuan        102.5833       26.6500          133       130     2012      12        26        361              0.000000       8.815796       0.000000       0.261275       0.391000       0.127200   -9999.000000       0.097000
56675     56675     sichuan        102.5833       26.6500          133       130     2012      12        27        362              0.149455       8.631409       0.000000       0.259784       0.420500   -9999.000000   -9999.000000   -9999.000000
56675     56675     sichuan        102.5833       26.6500          133       130     2012      12        28        363              0.138000       8.121765       0.000000       0.259188       0.397000       0.147600       0.172500       0.001000
56675     56675     sichuan        102.5833       26.6500          133       130     2012      12        29        364              0.000000       8.453796       0.000000       0.258295   -9999.000000   -9999.000000       0.179400   -9999.000000
56675     56675     sichuan        102.5833       26.6500          133       130     2012      12        30        365              0.000000       6.048218       0.000000       0.257949   -9999.000000   -9999.000000       0.179800   -9999.000000
56675     56675     sichuan        102.5833       26.6500          133       130     2012      12        31        366              0.142667       1.779999       0.000000       0.255867   -9999.000000   -9999.000000       0.164300   -9999.000000
