# Supplementary material for: Research on Fusing Multisatellite Soil Moisture Data Based on Bayesian Model Averaging
Source: Hindawi journal article supplement (doi:10.1155/2018/9310838), 2018-06-25
Supplement: f1 [file 9310838.f1.zip › 2012_sm00-10cm_daily_ZDB_ZHY_56691_366days_allin.txt]

56691     56691     guizhou        104.2803       26.8628          133       137     2012      01        01        001              0.000000   -9999.000000       1.285779   -9999.000000       0.158000       0.151400   -9999.000000   -9999.000000
56691     56691     guizhou        104.2803       26.8628          133       137     2012      01        02        002              0.156333       0.081604       0.381341       0.202695   -9999.000000       0.024200   -9999.000000   -9999.000000
56691     56691     guizhou        104.2803       26.8628          133       137     2012      01        03        003              0.000000       0.182648       0.166229       0.214898   -9999.000000   -9999.000000       0.059000       0.033000
56691     56691     guizhou        104.2803       26.8628          133       137     2012      01        04        004              0.153727      -1.461212       1.867330       0.168832   -9999.000000   -9999.000000       0.057300       0.150000
56691     56691     guizhou        104.2803       26.8628          133       137     2012      01        05        005              0.156250      -1.140503       4.854862       0.167574       0.195000   -9999.000000       0.054600   -9999.000000
56691     56691     guizhou        104.2803       26.8628          133       137     2012      01        06        006              0.157833       1.791840       0.212147       0.260192       0.182000   -9999.000000   -9999.000000       0.130000
56691     56691     guizhou        104.2803       26.8628          133       137     2012      01        07        007              0.159833       2.437317       0.221496       0.269249   -9999.000000   -9999.000000   -9999.000000   -9999.000000
56691     56691     guizhou        104.2803       26.8628          133       137     2012      01        08        008              0.000000       1.977295       0.246635       0.263168   -9999.000000   -9999.000000       0.061300       0.173000
56691     56691     guizhou        104.2803       26.8628          133       137     2012      01        09        009              0.162625       4.068665       0.080683       0.283438       0.193000       0.133400       0.062200   -9999.000000
56691     56691     guizhou        104.2803       26.8628          133       137     2012      01        10        010              0.162522       3.687775       0.257181       0.288151       0.171000   -9999.000000       0.076500       0.103000
56691     56691     guizhou        104.2803       26.8628          133       137     2012      01        11        011              0.162130       2.965851       0.872550       0.275371       0.142000   -9999.000000       0.071800       0.173000
56691     56691     guizhou        104.2803       26.8628          133       137     2012      01        12        012              0.164208       0.944153       0.170653       0.259916   -9999.000000   -9999.000000   -9999.000000   -9999.000000
56691     56691     guizhou        104.2803       26.8628          133       137     2012      01        13        013              0.163783       6.589905       0.315739       0.300545   -9999.000000   -9999.000000   -9999.000000       0.053000
56691     56691     guizhou        104.2803       26.8628          133       137     2012      01        14        014              0.161522       6.656586       0.000000       0.303644   -9999.000000       0.175400       0.072700   -9999.000000
56691     56691     guizhou        104.2803       26.8628          133       137     2012      01        15        015              0.160667       3.907745       0.000000       0.288780       0.144000   -9999.000000       0.073000       0.061000
56691     56691     guizhou        104.2803       26.8628          133       137     2012      01        16        016              0.160913       2.808411       0.656753       0.282332       0.129000       0.033600       0.066400       0.152000
56691     56691     guizhou        104.2803       26.8628          133       137     2012      01        17        017              0.000000       5.916656       0.000000       0.291014       0.120000       0.027300   -9999.000000   -9999.000000
56691     56691     guizhou        104.2803       26.8628          133       137     2012      01        18        018              0.160783       1.804169       0.139635       0.276595   -9999.000000   -9999.000000   -9999.000000       0.022000
56691     56691     guizhou        104.2803       26.8628          133       137     2012      01        19        019              0.160455       4.299133       0.589237       0.285960   -9999.000000       0.120800   -9999.000000   -9999.000000
56691     56691     guizhou        104.2803       26.8628          133       137     2012      01        20        020              0.159917       6.285156       0.059830       0.293809       0.152000       0.036900       0.077000       0.063000
56691     56691     guizhou        104.2803       26.8628          133       137     2012      01        21        021              0.157917       6.191223       0.138552       0.289609       0.133000   -9999.000000       0.075400       0.054000
56691     56691     guizhou        104.2803       26.8628          133       137     2012      01        22        022              0.155750       1.842072       0.000000       0.258194   -9999.000000   -9999.000000       0.066100       0.042000
56691     56691     guizhou        104.2803       26.8628          133       137     2012      01        23        023              0.157667      -0.478485       1.208239       0.191650   -9999.000000   -9999.000000   -9999.000000       0.023000
56691     56691     guizhou        104.2803       26.8628          133       137     2012      01        24        024              0.155304       2.732574       0.000000       0.249932   -9999.000000       0.043700   -9999.000000   -9999.000000
56691     56691     guizhou        104.2803       26.8628          133       137     2012      01        25        025              0.155125      -1.053375       0.000000       0.174735   -9999.000000       0.015300       0.069700       0.038000
56691     56691     guizhou        104.2803       26.8628          133       137     2012      01        26        026              0.154708      -0.775757       0.619218       0.178456       0.144000   -9999.000000       0.069000   -9999.000000
56691     56691     guizhou        104.2803       26.8628          133       137     2012      01        27        027              0.154750      -0.276001       0.362258       0.194969       0.138000       0.124900       0.067000       0.072000
56691     56691     guizhou        104.2803       26.8628          133       137     2012      01        28        028              0.154708       0.855377       0.000000       0.223844   -9999.000000   -9999.000000       0.060800   -9999.000000
56691     56691     guizhou        104.2803       26.8628          133       137     2012      01        29        029              0.154542       0.393402       3.203677       0.218143   -9999.000000       0.100900   -9999.000000   -9999.000000
56691     56691     guizhou        104.2803       26.8628          133       137     2012      01        30        030              0.154000       0.674988       0.091915       0.224451   -9999.000000       0.080900   -9999.000000       0.098000
56691     56691     guizhou        104.2803       26.8628          133       137     2012      01        31        031              0.155696       0.006897       0.245102       0.210506       0.142000   -9999.000000       0.072200   -9999.000000
56691     56691     guizhou        104.2803       26.8628          133       137     2012      02        01        032              0.155783       3.236450       3.391237       0.267559       0.115000       0.068500       0.073700       0.037000
56691     56691     guizhou        104.2803       26.8628          133       137     2012      02        02        033              0.153261       5.049286       0.000000       0.284154   -9999.000000   -9999.000000       0.064600       0.065000
56691     56691     guizhou        104.2803       26.8628          133       137     2012      02        03        034              0.155130       0.796844       0.530193       0.247607   -9999.000000       0.048400   -9999.000000   -9999.000000
56691     56691     guizhou        104.2803       26.8628          133       137     2012      02        04        035              0.154400       5.692902       0.665661       0.288566       0.113000       0.151500   -9999.000000       0.009000
56691     56691     guizhou        104.2803       26.8628          133       137     2012      02        05        036              0.152750       9.190369       0.166063       0.296010       0.115000   -9999.000000   -9999.000000   -9999.000000
56691     56691     guizhou        104.2803       26.8628          133       137     2012      02        06        037              0.151056       9.082306       0.000000       0.291563       0.111000       0.017900       0.079600       0.015000
56691     56691     guizhou        104.2803       26.8628          133       137     2012      02        07        038              0.150500       3.454681       0.132605       0.283871   -9999.000000       0.005000       0.086800   -9999.000000
56691     56691     guizhou        104.2803       26.8628          133       137     2012      02        08        039              0.149250       2.541412       0.228680       0.283562   -9999.000000   -9999.000000       0.073200       0.198000
56691     56691     guizhou        104.2803       26.8628          133       137     2012      02        09        040              0.150391       1.678253       0.157464       0.277484   -9999.000000       0.123600   -9999.000000       0.312000
56691     56691     guizhou        104.2803       26.8628          133       137     2012      02        10        041              0.148667       6.816864       0.054639       0.274623   -9999.000000   -9999.000000   -9999.000000   -9999.000000
56691     56691     guizhou        104.2803       26.8628          133       137     2012      02        11        042              0.150542       0.802155       0.108980       0.234497       0.117000       0.064300       0.077100       0.054000
56691     56691     guizhou        104.2803       26.8628          133       137     2012      02        12        043              0.149875       8.522461       0.000000       0.283414       0.108000   -9999.000000       0.067700   -9999.000000
56691     56691     guizhou        104.2803       26.8628          133       137     2012      02        13        044              0.148667      10.692657       0.544843       0.288088   -9999.000000   -9999.000000       0.061400       0.097000
56691     56691     guizhou        104.2803       26.8628          133       137     2012      02        14        045              0.147217      10.995636       0.656489       0.285375   -9999.000000       0.021100   -9999.000000       0.047000
56691     56691     guizhou        104.2803       26.8628          133       137     2012      02        15        046              0.145250       9.891724       0.000000       0.285220       0.145000   -9999.000000   -9999.000000   -9999.000000
56691     56691     guizhou        104.2803       26.8628          133       137     2012      02        16        047              0.144250       5.802673       0.000000       0.276813       0.135000       0.096200   -9999.000000   -9999.000000
56691     56691     guizhou        104.2803       26.8628          133       137     2012      02        17        048              0.143750       2.710510       0.251769       0.273155       0.140000       0.117400       0.076000   -9999.000000
56691     56691     guizhou        104.2803       26.8628          133       137     2012      02        18        049              0.000000       2.199524       0.000000       0.260669   -9999.000000   -9999.000000       0.070900       0.017000
56691     56691     guizhou        104.2803       26.8628          133       137     2012      02        19        050              0.146800       0.450287       2.009985       0.222016   -9999.000000       0.094000       0.063600       0.389000
56691     56691     guizhou        104.2803       26.8628          133       137     2012      02        20        051              0.145667       6.555725       0.000000       0.287471       0.123000   -9999.000000   -9999.000000   -9999.000000
56691     56691     guizhou        104.2803       26.8628          133       137     2012      02        21        052              0.145043      10.197571       0.312726       0.288889       0.103500       0.083300   -9999.000000       0.076000
56691     56691     guizhou        104.2803       26.8628          133       137     2012      02        22        053              0.144647      11.464935       0.000000       0.284831       0.107000       0.063900   -9999.000000   -9999.000000
56691     56691     guizhou        104.2803       26.8628          133       137     2012      02        23        054              0.000000      10.067688       0.272212       0.281349       0.105000   -9999.000000       0.083800       0.049000
56691     56691     guizhou        104.2803       26.8628          133       137     2012      02        24        055              0.143706      10.215851       0.221983       0.281104   -9999.000000       0.168100       0.090700   -9999.000000
56691     56691     guizhou        104.2803       26.8628          133       137     2012      02        25        056              0.142565       8.116119       0.257572       0.282351   -9999.000000       0.098600       0.071600       0.080000
56691     56691     guizhou        104.2803       26.8628          133       137     2012      02        26        057              0.141174       4.889435       0.053431       0.275153       0.118000   -9999.000000   -9999.000000       0.066000
56691     56691     guizhou        104.2803       26.8628          133       137     2012      02        27        058              0.141870       1.787811       1.150450       0.246970       0.124000       0.168400   -9999.000000   -9999.000000
56691     56691     guizhou        104.2803       26.8628          133       137     2012      02        28        059              0.142750       2.515472       0.342129       0.268004       0.105000   -9999.000000   -9999.000000       0.204000
56691     56691     guizhou        104.2803       26.8628          133       137     2012      02        29        060              0.000000   -9999.000000       3.137620   -9999.000000   -9999.000000       0.115800   -9999.000000   -9999.000000
56691     56691     guizhou        104.2803       26.8628          133       137     2012      03        01        061              0.143043       7.065063       0.677513       0.279224   -9999.000000   -9999.000000       0.083400       0.019000
56691     56691     guizhou        104.2803       26.8628          133       137     2012      03        02        062              0.142500       9.443298       0.152930       0.283573       0.120500   -9999.000000       0.074000       0.121000
56691     56691     guizhou        104.2803       26.8628          133       137     2012      03        03        063              0.142667      10.686707       0.427065       0.281314       0.108000       0.113100   -9999.000000   -9999.000000
56691     56691     guizhou        104.2803       26.8628          133       137     2012      03        04        064              0.142217       9.525269       0.000000       0.282087       0.108500   -9999.000000   -9999.000000       0.073000
56691     56691     guizhou        104.2803       26.8628          133       137     2012      03        05        065              0.141958      10.612976       2.407648       0.276651   -9999.000000       0.030100       0.076800   -9999.000000
56691     56691     guizhou        104.2803       26.8628          133       137     2012      03        06        066              0.141522      12.015289       0.720948       0.281648   -9999.000000       0.071600       0.084400       0.072000
56691     56691     guizhou        104.2803       26.8628          133       137     2012      03        07        067              0.000000       9.765594       0.182641       0.280028       0.123000   -9999.000000       0.072800       0.108000
56691     56691     guizhou        104.2803       26.8628          133       137     2012      03        08        068              0.140542       8.643890       0.253700       0.279518       0.119000       0.156900   -9999.000000       0.097000
56691     56691     guizhou        104.2803       26.8628          133       137     2012      03        09        069              0.138833       5.384125       0.078121       0.274702       0.112000   -9999.000000   -9999.000000       0.094000
56691     56691     guizhou        104.2803       26.8628          133       137     2012      03        10        070              0.139391       1.642731       0.294658       0.250580   -9999.000000       0.060300   -9999.000000   -9999.000000
56691     56691     guizhou        104.2803       26.8628          133       137     2012      03        11        071              0.140783       1.512848       0.232809       0.255004   -9999.000000       0.237600       0.089300       0.053000
56691     56691     guizhou        104.2803       26.8628          133       137     2012      03        12        072              0.140261       4.971863       0.422963       0.277102   -9999.000000   -9999.000000       0.091900   -9999.000000
56691     56691     guizhou        104.2803       26.8628          133       137     2012      03        13        073              0.141208       4.297272       0.451310       0.280015       0.120500       0.099100       0.077900       0.065000
56691     56691     guizhou        104.2803       26.8628          133       137     2012      03        14        074              0.141652       5.857849       0.000000       0.285666       0.101500       0.054800   -9999.000000       0.204000
56691     56691     guizhou        104.2803       26.8628          133       137     2012      03        15        075              0.141292      13.371643       0.661302       0.278128       0.104000   -9999.000000   -9999.000000   -9999.000000
56691     56691     guizhou        104.2803       26.8628          133       137     2012      03        16        076              0.140792      14.381897       1.163848       0.271749   -9999.000000       0.078700       0.077600       0.202000
56691     56691     guizhou        104.2803       26.8628          133       137     2012      03        17        077              0.139750      14.559387       0.000000       0.271023       0.100000   -9999.000000       0.080100   -9999.000000
56691     56691     guizhou        104.2803       26.8628          133       137     2012      03        18        078              0.139167      14.152069       0.000000       0.264799       0.098000       0.121900       0.076800       0.198000
56691     56691     guizhou        104.2803       26.8628          133       137     2012      03        19        079              0.138348      15.457825       0.479274       0.258189       0.095500       0.012400   -9999.000000       0.059000
56691     56691     guizhou        104.2803       26.8628          133       137     2012      03        20        080              0.137833      15.944763       0.169122       0.255071       0.103000   -9999.000000   -9999.000000       0.022000
56691     56691     guizhou        104.2803       26.8628          133       137     2012      03        21        081              0.137263      17.910034       0.383493       0.248436   -9999.000000       0.070100   -9999.000000       0.225000
56691     56691     guizhou        104.2803       26.8628          133       137     2012      03        22        082              0.136125      17.813660       0.273397       0.245284   -9999.000000   -9999.000000       0.081400   -9999.000000
56691     56691     guizhou        104.2803       26.8628          133       137     2012      03        23        083              0.134304      12.368286       0.081964       0.247617       0.137000   -9999.000000       0.081600       0.003000
56691     56691     guizhou        104.2803       26.8628          133       137     2012      03        24        084              0.136333       2.656769       0.243935       0.244611       0.108500   -9999.000000       0.069800   -9999.000000
56691     56691     guizhou        104.2803       26.8628          133       137     2012      03        25        085              0.000000      10.042877       2.549393       0.253923       0.115000   -9999.000000   -9999.000000       0.065000
56691     56691     guizhou        104.2803       26.8628          133       137     2012      03        26        086              0.136833      12.076569       4.229403       0.258101   -9999.000000   -9999.000000   -9999.000000       0.288000
56691     56691     guizhou        104.2803       26.8628          133       137     2012      03        27        087              0.140042      10.308289       9.226614       0.278855   -9999.000000   -9999.000000   -9999.000000   -9999.000000
56691     56691     guizhou        104.2803       26.8628          133       137     2012      03        28        088              0.156250      11.977295       1.509053       0.307304       0.150500       0.084500       0.103200       0.082000
56691     56691     guizhou        104.2803       26.8628          133       137     2012      03        29        089              0.161417      15.768494       0.376605       0.298912       0.133500       0.075800       0.105100   -9999.000000
56691     56691     guizhou        104.2803       26.8628          133       137     2012      03        30        090              0.160833      10.323761       3.239296       0.292722       0.121000   -9999.000000       0.083200       0.203000
56691     56691     guizhou        104.2803       26.8628          133       137     2012      03        31        091              0.165739       6.072815       1.389490       0.296941       0.139000       0.256700   -9999.000000       0.588000
56691     56691     guizhou        104.2803       26.8628          133       137     2012      04        01        092              0.167750       7.527893       0.416830       0.298846   -9999.000000   -9999.000000   -9999.000000   -9999.000000
56691     56691     guizhou        104.2803       26.8628          133       137     2012      04        02        093              0.163458      14.565887       0.462062       0.285027       0.114000   -9999.000000       0.082000       0.011000
56691     56691     guizhou        104.2803       26.8628          133       137     2012      04        03        094              0.159000      17.410309       0.257535       0.273596       0.102500       0.089000       0.084800   -9999.000000
56691     56691     guizhou        104.2803       26.8628          133       137     2012      04        04        095              0.156125      16.062988       0.324687       0.271979       0.099500   -9999.000000       0.064800       0.072000
56691     56691     guizhou        104.2803       26.8628          133       137     2012      04        05        096              0.154250      14.928619       1.181959       0.269241       0.097000       0.067800   -9999.000000   -9999.000000
56691     56691     guizhou        104.2803       26.8628          133       137     2012      04        06        097              0.152667      12.993225       1.247148       0.272200   -9999.000000       0.031500   -9999.000000       0.188000
56691     56691     guizhou        104.2803       26.8628          133       137     2012      04        07        098              0.151250       8.621918       2.091350       0.279015       0.159000   -9999.000000   -9999.000000       0.697000
56691     56691     guizhou        104.2803       26.8628          133       137     2012      04        08        099              0.154250       7.497009       9.987604       0.290434       0.136000       0.341900       0.113700   -9999.000000
56691     56691     guizhou        104.2803       26.8628          133       137     2012      04        09        100              0.166417       9.316101       0.270618       0.313693       0.119000   -9999.000000       0.089500       0.247000
56691     56691     guizhou        104.2803       26.8628          133       137     2012      04        10        101              0.164375      15.292816       0.495221       0.298415       0.106500       0.147400       0.071600   -9999.000000
56691     56691     guizhou        104.2803       26.8628          133       137     2012      04        11        102              0.160542      16.477905       0.190612       0.286953   -9999.000000       0.098200   -9999.000000       0.268000
56691     56691     guizhou        104.2803       26.8628          133       137     2012      04        12        103              0.157000      17.396881       0.837918       0.278937   -9999.000000   -9999.000000   -9999.000000       0.278000
56691     56691     guizhou        104.2803       26.8628          133       137     2012      04        13        104              0.155083      13.504669       0.000000       0.280100       0.113500       0.329300   -9999.000000   -9999.000000
56691     56691     guizhou        104.2803       26.8628          133       137     2012      04        14        105              0.153000      12.986603       0.287843       0.277887       0.093500   -9999.000000       0.076800       0.260000
56691     56691     guizhou        104.2803       26.8628          133       137     2012      04        15        106              0.150792      17.051666       0.000000       0.267265       0.097500       0.058100       0.076700   -9999.000000
56691     56691     guizhou        104.2803       26.8628          133       137     2012      04        16        107              0.149500      15.895538       0.413039       0.261915   -9999.000000       0.052400       0.064500       0.240000
56691     56691     guizhou        104.2803       26.8628          133       137     2012      04        17        108              0.148750      12.578827       0.371686       0.266180   -9999.000000   -9999.000000   -9999.000000       0.101000
56691     56691     guizhou        104.2803       26.8628          133       137     2012      04        18        109              0.147250      14.943665       0.000000       0.263264       0.115500       0.132200   -9999.000000       0.074000
56691     56691     guizhou        104.2803       26.8628          133       137     2012      04        19        110              0.146042      15.467438       4.643978       0.260659       0.126000       0.116400       0.098100       0.627000
56691     56691     guizhou        104.2803       26.8628          133       137     2012      04        20        111              0.144875      14.995605      10.730707       0.278527       0.094000   -9999.000000       0.097600   -9999.000000
56691     56691     guizhou        104.2803       26.8628          133       137     2012      04        21        112              0.144875      15.075134       5.118154       0.296546       0.095000       0.066900       0.063800       0.458000
56691     56691     guizhou        104.2803       26.8628          133       137     2012      04        22        113              0.144250      16.828552       0.120117       0.306029   -9999.000000   -9999.000000   -9999.000000   -9999.000000
56691     56691     guizhou        104.2803       26.8628          133       137     2012      04        23        114              0.143750      17.117737       0.135330       0.292106       0.094000   -9999.000000   -9999.000000       0.221000
56691     56691     guizhou        104.2803       26.8628          133       137     2012      04        24        115              0.142917      19.397491       0.000000       0.275860       0.100000   -9999.000000   -9999.000000       0.294000
56691     56691     guizhou        104.2803       26.8628          133       137     2012      04        25        116              0.000000      19.007874       0.482935       0.266479       0.121500   -9999.000000       0.102600   -9999.000000
56691     56691     guizhou        104.2803       26.8628          133       137     2012      04        26        117              0.147000      11.571930       0.155176       0.272447       0.098000       0.180900       0.086100       0.066000
56691     56691     guizhou        104.2803       26.8628          133       137     2012      04        27        118              0.146625      16.083405       0.032389       0.270931   -9999.000000   -9999.000000       0.072000   -9999.000000
56691     56691     guizhou        104.2803       26.8628          133       137     2012      04        28        119              0.144375      18.584656       0.188306       0.262814   -9999.000000   -9999.000000   -9999.000000       0.180000
56691     56691     guizhou        104.2803       26.8628          133       137     2012      04        29        120              0.143625      18.485931       2.040234       0.258956       0.097500       0.043400   -9999.000000       0.371000
56691     56691     guizhou        104.2803       26.8628          133       137     2012      04        30        121              0.143000      19.276672       0.170247       0.262030       0.092500   -9999.000000       0.084400   -9999.000000
56691     56691     guizhou        104.2803       26.8628          133       137     2012      05        01        122              0.142167      20.972076       0.492540       0.249382       0.111500       0.089300       0.077100       0.114000
56691     56691     guizhou        104.2803       26.8628          133       137     2012      05        02        123              0.141667      18.173462       1.058557       0.247207   -9999.000000   -9999.000000       0.082800   -9999.000000
56691     56691     guizhou        104.2803       26.8628          133       137     2012      05        03        124              0.141208      18.908722       0.256954       0.247299   -9999.000000       0.089700       0.066800       0.198000
56691     56691     guizhou        104.2803       26.8628          133       137     2012      05        04        125              0.140333      20.563416       0.000000       0.237618       0.124000   -9999.000000   -9999.000000   -9999.000000
56691     56691     guizhou        104.2803       26.8628          133       137     2012      05        05        126              0.140000      20.236389       2.627253       0.235450       0.115500   -9999.000000   -9999.000000       0.362000
56691     56691     guizhou        104.2803       26.8628          133       137     2012      05        06        127              0.139167      20.492554       0.469663       0.248119       0.108000       0.259400       0.086000       0.406000
56691     56691     guizhou        104.2803       26.8628          133       137     2012      05        07        128              0.138667      19.572235       0.267936       0.249097   -9999.000000   -9999.000000       0.087500   -9999.000000
56691     56691     guizhou        104.2803       26.8628          133       137     2012      05        08        129              0.138000      20.498749       8.238700       0.240947   -9999.000000   -9999.000000       0.102000       0.808000
56691     56691     guizhou        104.2803       26.8628          133       137     2012      05        09        130              0.138417      17.275909       7.414910       0.285073   -9999.000000       0.258200   -9999.000000   -9999.000000
56691     56691     guizhou        104.2803       26.8628          133       137     2012      05        10        131              0.138417      20.114685       1.235255       0.285659       0.121000   -9999.000000   -9999.000000       0.375000
56691     56691     guizhou        104.2803       26.8628          133       137     2012      05        11        132              0.138333      21.218994       1.413598       0.289407       0.129000       0.244000   -9999.000000       0.449000
56691     56691     guizhou        104.2803       26.8628          133       137     2012      05        12        133              0.136583      21.353210       0.372261       0.277412       0.134000       0.175300       0.100800   -9999.000000
56691     56691     guizhou        104.2803       26.8628          133       137     2012      05        13        134              0.136833      15.264343       0.558987       0.277070   -9999.000000   -9999.000000       0.109100       0.459000
56691     56691     guizhou        104.2803       26.8628          133       137     2012      05        14        135              0.136000      17.405792       0.446387       0.270681       0.145000       0.097300       0.087700   -9999.000000
56691     56691     guizhou        104.2803       26.8628          133       137     2012      05        15        136              0.136000      12.478577       0.386788       0.271913       0.135000   -9999.000000   -9999.000000       0.201000
56691     56691     guizhou        104.2803       26.8628          133       137     2012      05        16        137              0.135833      14.216248       0.575849       0.269071       0.122500       0.068000   -9999.000000       0.241000
56691     56691     guizhou        104.2803       26.8628          133       137     2012      05        17        138              0.135875      14.290924       0.000000       0.269516       0.121000       0.054700       0.086800       0.236000
56691     56691     guizhou        104.2803       26.8628          133       137     2012      05        18        139              0.187542      19.172180       6.574357       0.261641   -9999.000000   -9999.000000       0.096900       0.379000
56691     56691     guizhou        104.2803       26.8628          133       137     2012      05        19        140              0.243792      21.251282      15.147816       0.270758   -9999.000000       0.293300       0.108400   -9999.000000
56691     56691     guizhou        104.2803       26.8628          133       137     2012      05        20        141              0.241750      21.742920       0.000000       0.297973       0.123000   -9999.000000       0.079600       0.418000
56691     56691     guizhou        104.2803       26.8628          133       137     2012      05        21        142              0.194708      22.014221       3.650177       0.301563       0.122000       0.266000   -9999.000000   -9999.000000
56691     56691     guizhou        104.2803       26.8628          133       137     2012      05        22        143              0.180667      21.083923       1.654497       0.296574       0.140500       0.218400   -9999.000000       0.733000
56691     56691     guizhou        104.2803       26.8628          133       137     2012      05        23        144              0.173792      14.400543       3.972443       0.295122   -9999.000000   -9999.000000       0.094000       0.852000
56691     56691     guizhou        104.2803       26.8628          133       137     2012      05        24        145              0.169261      14.603241       1.455949       0.300854   -9999.000000       0.424300       0.094500   -9999.000000
56691     56691     guizhou        104.2803       26.8628          133       137     2012      05        25        146              0.000000      12.947876       0.828833       0.304173       0.156000   -9999.000000       0.084500       0.817000
56691     56691     guizhou        104.2803       26.8628          133       137     2012      05        26        147              0.166000      12.287445       1.024097       0.300061       0.127500       0.209900   -9999.000000   -9999.000000
56691     56691     guizhou        104.2803       26.8628          133       137     2012      05        27        148              0.163125      16.867950       8.816071       0.297316       0.131000       0.144500   -9999.000000       0.707000
56691     56691     guizhou        104.2803       26.8628          133       137     2012      05        28        149              0.161261      17.778259      12.460647       0.307618   -9999.000000   -9999.000000   -9999.000000       1.000000
56691     56691     guizhou        104.2803       26.8628          133       137     2012      05        29        150              0.285417      19.152649      12.059777       0.322648   -9999.000000       0.280400       0.082800   -9999.000000
56691     56691     guizhou        104.2803       26.8628          133       137     2012      05        30        151              0.233167      14.128601       0.395403       0.339478       0.145000       0.294300       0.085700   -9999.000000
56691     56691     guizhou        104.2803       26.8628          133       137     2012      05        31        152              0.226958      16.484314      10.268080       0.316201       0.156000   -9999.000000       0.077500   -9999.000000
56691     56691     guizhou        104.2803       26.8628          133       137     2012      06        01        153              0.295042      15.786163       8.054168       0.322656       0.188000       0.369200   -9999.000000       0.956000
56691     56691     guizhou        104.2803       26.8628          133       137     2012      06        02        154              0.272625      13.021271       0.478944       0.337523       0.174000   -9999.000000   -9999.000000   -9999.000000
56691     56691     guizhou        104.2803       26.8628          133       137     2012      06        03        155              0.267333      15.376312       4.328106       0.323494   -9999.000000       0.325300   -9999.000000       0.968000
56691     56691     guizhou        104.2803       26.8628          133       137     2012      06        04        156              0.264500      13.559387       0.132234       0.324990       0.178000       0.247000       0.104500       0.936000
56691     56691     guizhou        104.2803       26.8628          133       137     2012      06        05        157              0.230708      14.687042       0.182008       0.318242       0.147500   -9999.000000       0.099800   -9999.000000
56691     56691     guizhou        104.2803       26.8628          133       137     2012      06        06        158              0.207625      18.724976       4.314260       0.309371       0.141500       0.206500       0.095700       0.746000
56691     56691     guizhou        104.2803       26.8628          133       137     2012      06        07        159              0.191792      16.806061       2.401194       0.313850       0.123000   -9999.000000   -9999.000000   -9999.000000
56691     56691     guizhou        104.2803       26.8628          133       137     2012      06        08        160              0.184375      17.013184       2.794482       0.315442   -9999.000000       0.149900   -9999.000000       0.726000
56691     56691     guizhou        104.2803       26.8628          133       137     2012      06        09        161              0.176125      16.908295       2.503617       0.318599   -9999.000000       0.203600       0.086700       0.831000
56691     56691     guizhou        104.2803       26.8628          133       137     2012      06        10        162              0.169792      18.403046       1.797630       0.314842       0.143000   -9999.000000       0.097300   -9999.000000
56691     56691     guizhou        104.2803       26.8628          133       137     2012      06        11        163              0.000000      15.957611       7.089602       0.312502       0.146500       0.398300       0.054400       0.714000
56691     56691     guizhou        104.2803       26.8628          133       137     2012      06        12        164              0.197500      15.560822       3.097615       0.320100       0.152000   -9999.000000   -9999.000000   -9999.000000
56691     56691     guizhou        104.2803       26.8628          133       137     2012      06        13        165              0.209917      15.140778       7.446636       0.322312   -9999.000000   -9999.000000   -9999.000000       0.860000
56691     56691     guizhou        104.2803       26.8628          133       137     2012      06        14        166              0.208833      16.727112       0.760889       0.328340   -9999.000000       0.326700   -9999.000000       0.935000
56691     56691     guizhou        104.2803       26.8628          133       137     2012      06        15        167              0.202826      15.467804       0.000000       0.322765       0.126500   -9999.000000       0.057500       0.684000
56691     56691     guizhou        104.2803       26.8628          133       137     2012      06        16        168              0.198833      16.160950       3.500008       0.312827       0.135000       0.217900       0.060900       0.827000
56691     56691     guizhou        104.2803       26.8628          133       137     2012      06        17        169              0.205417      16.026459       5.593054       0.317435       0.146500       0.084700       0.054000   -9999.000000
56691     56691     guizhou        104.2803       26.8628          133       137     2012      06        18        170              0.225958      16.035309      29.966684       0.319502       0.128000   -9999.000000   -9999.000000       0.920000
56691     56691     guizhou        104.2803       26.8628          133       137     2012      06        19        171              0.288619      16.063049       0.853812       0.343317   -9999.000000       0.234100   -9999.000000   -9999.000000
56691     56691     guizhou        104.2803       26.8628          133       137     2012      06        20        172              0.272000      15.388977       1.251108       0.341626       0.148000   -9999.000000       0.121400       0.864000
56691     56691     guizhou        104.2803       26.8628          133       137     2012      06        21        173              0.306609      18.009552      18.627533       0.327025       0.181500       0.176300       0.135300       1.000000
56691     56691     guizhou        104.2803       26.8628          133       137     2012      06        22        174              0.297333      15.578827       1.566182       0.349095       0.165000       0.154800       0.111500   -9999.000000
56691     56691     guizhou        104.2803       26.8628          133       137     2012      06        23        175              0.280083      15.869690       3.092299       0.336069       0.136000   -9999.000000   -9999.000000       0.792000
56691     56691     guizhou        104.2803       26.8628          133       137     2012      06        24        176              0.290000      19.542419      13.486431       0.325976   -9999.000000       0.306400   -9999.000000   -9999.000000
56691     56691     guizhou        104.2803       26.8628          133       137     2012      06        25        177              0.282727      18.180634       0.362471       0.343232       0.160000   -9999.000000   -9999.000000       0.800000
56691     56691     guizhou        104.2803       26.8628          133       137     2012      06        26        178              0.283833      19.134033       5.857766       0.327849       0.158000       0.232000       0.113100       0.929000
56691     56691     guizhou        104.2803       26.8628          133       137     2012      06        27        179              0.306333      17.878021       5.080937       0.327982       0.147000       0.510800       0.111400   -9999.000000
56691     56691     guizhou        104.2803       26.8628          133       137     2012      06        28        180              0.298750      18.657074      22.037853       0.332940       0.147000   -9999.000000       0.098000       0.978000
56691     56691     guizhou        104.2803       26.8628          133       137     2012      06        29        181              0.304583      18.664124      33.869709       0.345130   -9999.000000       0.553600   -9999.000000   -9999.000000
56691     56691     guizhou        104.2803       26.8628          133       137     2012      06        30        182              0.316750      19.940186       2.757757       0.357648   -9999.000000   -9999.000000   -9999.000000   -9999.000000
56691     56691     guizhou        104.2803       26.8628          133       137     2012      07        01        183              0.290750      19.486053       1.366979       0.346506       0.114500       0.475100   -9999.000000   -9999.000000
56691     56691     guizhou        104.2803       26.8628          133       137     2012      07        02        184              0.266250      20.518921       0.000000       0.329780       0.116500       0.253300       0.167600       0.743000
56691     56691     guizhou        104.2803       26.8628          133       137     2012      07        03        185              0.253375      20.788452       0.999438       0.318820       0.120000   -9999.000000       0.173600       0.823000
56691     56691     guizhou        104.2803       26.8628          133       137     2012      07        04        186              0.292167      20.131256      15.526297       0.315614   -9999.000000       0.221500       0.173800   -9999.000000
56691     56691     guizhou        104.2803       26.8628          133       137     2012      07        05        187              0.298478      18.099274      17.361727       0.333265   -9999.000000       0.074800   -9999.000000       0.858000
56691     56691     guizhou        104.2803       26.8628          133       137     2012      07        06        188              0.274500      18.292999       0.000000       0.352072   -9999.000000   -9999.000000   -9999.000000   -9999.000000
56691     56691     guizhou        104.2803       26.8628          133       137     2012      07        07        189              0.251917      20.562531       0.077899       0.327143   -9999.000000       0.375500       0.163800       0.753000
56691     56691     guizhou        104.2803       26.8628          133       137     2012      07        08        190              0.235130      21.159210       0.429545       0.319269       0.107500   -9999.000000       0.167200       0.792000
56691     56691     guizhou        104.2803       26.8628          133       137     2012      07        09        191              0.223333      21.587372       0.000000       0.314546       0.106000       0.108800       0.126900   -9999.000000
56691     56691     guizhou        104.2803       26.8628          133       137     2012      07        10        192              0.214083      21.601501       9.901447       0.310465   -9999.000000       0.148600   -9999.000000       0.754000
56691     56691     guizhou        104.2803       26.8628          133       137     2012      07        11        193              0.211208      21.498444       9.910105       0.325214       0.210000   -9999.000000   -9999.000000   -9999.000000
56691     56691     guizhou        104.2803       26.8628          133       137     2012      07        12        194              0.294625      20.859589      17.276588       0.333422       0.240000       0.225900   -9999.000000       0.895000
56691     56691     guizhou        104.2803       26.8628          133       137     2012      07        13        195              0.303250      18.405273       0.655170       0.344124       0.190500   -9999.000000       0.149700       0.861000
56691     56691     guizhou        104.2803       26.8628          133       137     2012      07        14        196              0.270750      18.363281       0.000000       0.335864       0.173000       0.148600       0.147200       0.670000
56691     56691     guizhou        104.2803       26.8628          133       137     2012      07        15        197              0.268542      21.311066      10.475986       0.321578   -9999.000000       0.153200       0.129900       1.000000
56691     56691     guizhou        104.2803       26.8628          133       137     2012      07        16        198              0.310333      19.347443      18.620270       0.336787   -9999.000000   -9999.000000   -9999.000000   -9999.000000
56691     56691     guizhou        104.2803       26.8628          133       137     2012      07        17        199              0.296167      18.262177       0.851854       0.352213       0.243500       0.492900   -9999.000000       0.872000
56691     56691     guizhou        104.2803       26.8628          133       137     2012      07        18        200              0.288583      17.543091       1.585468       0.335203       0.222000   -9999.000000       0.205400   -9999.000000
56691     56691     guizhou        104.2803       26.8628          133       137     2012      07        19        201              0.303833      18.075653       5.070951       0.331491       0.189000       0.192500       0.199000       0.915000
56691     56691     guizhou        104.2803       26.8628          133       137     2012      07        20        202              0.291417      19.321747       0.000000       0.335702       0.202000       0.284900       0.192300       0.933000
56691     56691     guizhou        104.2803       26.8628          133       137     2012      07        21        203              0.272250      21.049255       1.227780       0.326195   -9999.000000   -9999.000000       0.175300   -9999.000000
56691     56691     guizhou        104.2803       26.8628          133       137     2012      07        22        204              0.326833      22.040192      35.053802       0.323246       0.270000       0.454300   -9999.000000       0.875000
56691     56691     guizhou        104.2803       26.8628          133       137     2012      07        23        205              0.307667      16.731964       0.327967       0.361927       0.234500       0.284800   -9999.000000   -9999.000000
56691     56691     guizhou        104.2803       26.8628          133       137     2012      07        24        206              0.291750      16.224091       5.042375       0.339727       0.228500   -9999.000000       0.127600       0.832000
56691     56691     guizhou        104.2803       26.8628          133       137     2012      07        25        207              0.310917      16.546021      13.604153       0.338588       0.237000       0.525500       0.123700       1.000000
56691     56691     guizhou        104.2803       26.8628          133       137     2012      07        26        208              0.311667      17.232178       0.432437       0.352457   -9999.000000   -9999.000000       0.114000   -9999.000000
56691     56691     guizhou        104.2803       26.8628          133       137     2012      07        27        209              0.323333      19.474213       8.075347       0.338963   -9999.000000       0.237700   -9999.000000       0.866000
56691     56691     guizhou        104.2803       26.8628          133       137     2012      07        28        210              0.316458      20.230682      12.029738       0.341316       0.206000       0.198100   -9999.000000   -9999.000000
56691     56691     guizhou        104.2803       26.8628          133       137     2012      07        29        211              0.295250      18.041351       3.262177       0.350204       0.200500   -9999.000000   -9999.000000       0.890000
56691     56691     guizhou        104.2803       26.8628          133       137     2012      07        30        212              0.295417      20.525330       2.980462       0.341026       0.187000       0.353300       0.108000   -9999.000000
56691     56691     guizhou        104.2803       26.8628          133       137     2012      07        31        213              0.297667      21.759796       4.398057       0.336816   -9999.000000   -9999.000000       0.110200       0.901000
56691     56691     guizhou        104.2803       26.8628          133       137     2012      08        01        214              0.289417      19.967010       1.183604       0.339353   -9999.000000       0.207100       0.097700       0.793000
56691     56691     guizhou        104.2803       26.8628          133       137     2012      08        02        215              0.277917      18.662445       0.745457       0.334053       0.247000       0.407900   -9999.000000   -9999.000000
56691     56691     guizhou        104.2803       26.8628          133       137     2012      08        03        216              0.262917      19.475616       0.386057       0.330305       0.212500   -9999.000000   -9999.000000       0.771000
56691     56691     guizhou        104.2803       26.8628          133       137     2012      08        04        217              0.251083      20.602814       1.819318       0.327296       0.201000       0.475000       0.109100   -9999.000000
56691     56691     guizhou        104.2803       26.8628          133       137     2012      08        05        218              0.244500      21.330444       1.787886       0.328297   -9999.000000   -9999.000000       0.108700       0.704000
56691     56691     guizhou        104.2803       26.8628          133       137     2012      08        06        219              0.245500      21.227692       6.566407       0.326375   -9999.000000       0.187000       0.162700       0.896000
56691     56691     guizhou        104.2803       26.8628          133       137     2012      08        07        220              0.259333      19.006989       3.620543       0.337087       0.250000       0.485100       0.146000   -9999.000000
56691     56691     guizhou        104.2803       26.8628          133       137     2012      08        08        221              0.256417      18.454163       1.225511       0.334935       0.206000   -9999.000000   -9999.000000       0.747000
56691     56691     guizhou        104.2803       26.8628          133       137     2012      08        09        222              0.245875      20.771851       0.727830       0.327040       0.205500       0.225900   -9999.000000   -9999.000000
56691     56691     guizhou        104.2803       26.8628          133       137     2012      08        10        223              0.234958      20.802124       0.000000       0.323286       0.198500       0.145600       0.144900       0.610000
56691     56691     guizhou        104.2803       26.8628          133       137     2012      08        11        224              0.224292      21.433197       0.000000       0.319106   -9999.000000   -9999.000000       0.148500       0.554000
56691     56691     guizhou        104.2803       26.8628          133       137     2012      08        12        225              0.217375      22.549042       1.111811       0.315951   -9999.000000       0.165400       0.126500       0.541000
56691     56691     guizhou        104.2803       26.8628          133       137     2012      08        13        226              0.210167      22.955353       1.176147       0.316234       0.161000   -9999.000000   -9999.000000       0.637000
56691     56691     guizhou        104.2803       26.8628          133       137     2012      08        14        227              0.206375      22.737732       7.008321       0.315782       0.168000       0.325100   -9999.000000   -9999.000000
56691     56691     guizhou        104.2803       26.8628          133       137     2012      08        15        228              0.204208      21.960144       2.601652       0.325077       0.146000       0.382900   -9999.000000       0.706000
56691     56691     guizhou        104.2803       26.8628          133       137     2012      08        16        229              0.201958      21.038330       0.000000       0.326979       0.143000   -9999.000000       0.185700   -9999.000000
56691     56691     guizhou        104.2803       26.8628          133       137     2012      08        17        230              0.197375      22.199799       0.294617       0.316513   -9999.000000       0.256600       0.186200       0.565000
56691     56691     guizhou        104.2803       26.8628          133       137     2012      08        18        231              0.196417      22.384888       3.842082       0.310748       0.166000   -9999.000000       0.185000       0.600000
56691     56691     guizhou        104.2803       26.8628          133       137     2012      08        19        232              0.199167      19.527863       0.605012       0.319686       0.164000       0.137400   -9999.000000   -9999.000000
56691     56691     guizhou        104.2803       26.8628          133       137     2012      08        20        233              0.198833      19.764160       8.044252       0.316760       0.158000       0.228300   -9999.000000       0.687000
56691     56691     guizhou        104.2803       26.8628          133       137     2012      08        21        234              0.211250      20.312805       0.000000       0.324858       0.166000   -9999.000000       0.164900   -9999.000000
56691     56691     guizhou        104.2803       26.8628          133       137     2012      08        22        235              0.208333      19.132141       0.149590       0.315517   -9999.000000       0.390500       0.175400   -9999.000000
56691     56691     guizhou        104.2803       26.8628          133       137     2012      08        23        236              0.206458      15.846069       0.383473       0.313938   -9999.000000   -9999.000000       0.173800       0.671000
56691     56691     guizhou        104.2803       26.8628          133       137     2012      08        24        237              0.206083      16.704254       2.276491       0.313053       0.205000       0.204400   -9999.000000   -9999.000000
56691     56691     guizhou        104.2803       26.8628          133       137     2012      08        25        238              0.000000      17.866699       1.247766       0.316257       0.190500   -9999.000000   -9999.000000       0.527000
56691     56691     guizhou        104.2803       26.8628          133       137     2012      08        26        239              0.203500      18.454895       1.538568       0.313939       0.187000   -9999.000000   -9999.000000   -9999.000000
56691     56691     guizhou        104.2803       26.8628          133       137     2012      08        27        240              0.199417      19.111084       2.684260       0.314682   -9999.000000       0.306200       0.168400       0.736000
56691     56691     guizhou        104.2803       26.8628          133       137     2012      08        28        241              0.199667      20.121002      13.787366       0.314571   -9999.000000       0.158400       0.174900   -9999.000000
56691     56691     guizhou        104.2803       26.8628          133       137     2012      08        29        242              0.210750      19.877197       0.734678       0.333383       0.195000   -9999.000000       0.154800       0.731000
56691     56691     guizhou        104.2803       26.8628          133       137     2012      08        30        243              0.207667      20.521942       0.714992       0.326171       0.198000       0.207900   -9999.000000       0.766000
56691     56691     guizhou        104.2803       26.8628          133       137     2012      08        31        244              0.202292      20.901550       5.304275       0.318271       0.186000   -9999.000000   -9999.000000   -9999.000000
56691     56691     guizhou        104.2803       26.8628          133       137     2012      09        01        245              0.222250      20.942841      33.665585       0.321639       0.181000       0.239800   -9999.000000       0.761000
56691     56691     guizhou        104.2803       26.8628          133       137     2012      09        02        246              0.283333      19.372711       0.248701       0.346279   -9999.000000       0.316000       0.176300   -9999.000000
56691     56691     guizhou        104.2803       26.8628          133       137     2012      09        03        247              0.260042      16.566956       0.107250       0.338108   -9999.000000   -9999.000000       0.185800       0.562000
56691     56691     guizhou        104.2803       26.8628          133       137     2012      09        04        248              0.242708      17.525116       0.000000       0.323449       0.184500       0.213100       0.164800       0.671000
56691     56691     guizhou        104.2803       26.8628          133       137     2012      09        05        249              0.228792      18.191620       0.165475       0.319455       0.181000   -9999.000000   -9999.000000   -9999.000000
56691     56691     guizhou        104.2803       26.8628          133       137     2012      09        06        250              0.215792      19.147461       0.000000       0.317123       0.170000       0.132500   -9999.000000       0.544000
56691     56691     guizhou        104.2803       26.8628          133       137     2012      09        07        251              0.204917      20.351501       0.000000       0.313161   -9999.000000       0.199500       0.167600   -9999.000000
56691     56691     guizhou        104.2803       26.8628          133       137     2012      09        08        252              0.195792      19.964996       3.499626       0.311580   -9999.000000   -9999.000000       0.185700       0.624000
56691     56691     guizhou        104.2803       26.8628          133       137     2012      09        09        253              0.189875      20.857147       1.237704       0.315621       0.185000       0.308500       0.164100       0.555000
56691     56691     guizhou        104.2803       26.8628          133       137     2012      09        10        254              0.186125      20.841156       1.169030       0.317150       0.167000   -9999.000000   -9999.000000       0.490000
56691     56691     guizhou        104.2803       26.8628          133       137     2012      09        11        255              0.320208      20.943176      29.982306       0.314869       0.172000       0.289100   -9999.000000       0.964000
56691     56691     guizhou        104.2803       26.8628          133       137     2012      09        12        256              0.303833      16.591278       7.107967       0.357447   -9999.000000       0.380500   -9999.000000   -9999.000000
56691     56691     guizhou        104.2803       26.8628          133       137     2012      09        13        257              0.301833      13.306061       0.279213       0.340089   -9999.000000   -9999.000000       0.152000       0.610000
56691     56691     guizhou        104.2803       26.8628          133       137     2012      09        14        258              0.283417      13.333221       0.443820       0.332251       0.153000       0.410100       0.145400   -9999.000000
56691     56691     guizhou        104.2803       26.8628          133       137     2012      09        15        259              0.270542      14.938599       0.482110       0.324612       0.159500       0.238000       0.128800       0.631000
56691     56691     guizhou        104.2803       26.8628          133       137     2012      09        16        260              0.273292      15.559540       2.483521       0.322541       0.175000   -9999.000000   -9999.000000       0.713000
56691     56691     guizhou        104.2803       26.8628          133       137     2012      09        17        261              0.284250      13.913330       3.559826       0.327270       0.183000       0.219200   -9999.000000   -9999.000000
56691     56691     guizhou        104.2803       26.8628          133       137     2012      09        18        262              0.305750      13.171661       4.033400       0.328586   -9999.000000   -9999.000000       0.092700       0.733000
56691     56691     guizhou        104.2803       26.8628          133       137     2012      09        19        263              0.294500      12.690216       1.613127       0.333599   -9999.000000       0.493900       0.093000   -9999.000000
56691     56691     guizhou        104.2803       26.8628          133       137     2012      09        20        264              0.296917      13.944305       2.261780       0.330218       0.183500       0.181800       0.096400       0.839000
56691     56691     guizhou        104.2803       26.8628          133       137     2012      09        21        265              0.296500      15.344971       1.500331       0.329467   -9999.000000   -9999.000000       0.084200       0.828000
56691     56691     guizhou        104.2803       26.8628          133       137     2012      09        22        266              0.291167      13.767334       0.293199       0.329476       0.155000       0.398000   -9999.000000   -9999.000000
56691     56691     guizhou        104.2803       26.8628          133       137     2012      09        23        267              0.286000      14.387726       0.554784       0.325807   -9999.000000   -9999.000000   -9999.000000       0.608000
56691     56691     guizhou        104.2803       26.8628          133       137     2012      09        24        268              0.285333      13.561981       0.180405       0.324977   -9999.000000       0.224300       0.106000   -9999.000000
56691     56691     guizhou        104.2803       26.8628          133       137     2012      09        25        269              0.298417      14.391449       7.986970       0.324739   -9999.000000       0.204600       0.111000       0.865000
56691     56691     guizhou        104.2803       26.8628          133       137     2012      09        26        270              0.304500      16.753510       2.420862       0.330752       0.161000   -9999.000000       0.097200   -9999.000000
56691     56691     guizhou        104.2803       26.8628          133       137     2012      09        27        271              0.293571      15.256500       0.982119       0.334231       0.167500       0.423700   -9999.000000       0.787000
56691     56691     guizhou        104.2803       26.8628          133       137     2012      09        28        272              0.287000      13.921844       1.269184       0.329127       0.160000   -9999.000000   -9999.000000       0.817000
56691     56691     guizhou        104.2803       26.8628          133       137     2012      09        29        273              0.288667      13.497833       5.428355       0.328545   -9999.000000       0.364800   -9999.000000   -9999.000000
56691     56691     guizhou        104.2803       26.8628          133       137     2012      09        30        274              0.312917      14.689850      11.745115       0.328575   -9999.000000   -9999.000000       0.103800       0.873000
56691     56691     guizhou        104.2803       26.8628          133       137     2012      10        01        275              0.295500      13.169128       0.793418       0.345548       0.139500   -9999.000000       0.066600   -9999.000000
56691     56691     guizhou        104.2803       26.8628          133       137     2012      10        02        276              0.293292      15.495117      18.386906       0.329949       0.135000       0.584200       0.056600       0.717000
56691     56691     guizhou        104.2803       26.8628          133       137     2012      10        03        277              0.312875      15.093079       5.052190       0.339574       0.139500   -9999.000000   -9999.000000       0.775000
56691     56691     guizhou        104.2803       26.8628          133       137     2012      10        04        278              0.313208      12.933014       3.471413       0.346462   -9999.000000       0.193600   -9999.000000   -9999.000000
56691     56691     guizhou        104.2803       26.8628          133       137     2012      10        05        279              0.310500      12.014771       1.996598       0.340126   -9999.000000       0.175900       0.070900       0.839000
56691     56691     guizhou        104.2803       26.8628          133       137     2012      10        06        280              0.305667      11.684723       0.432707       0.336684       0.151000   -9999.000000       0.072000   -9999.000000
56691     56691     guizhou        104.2803       26.8628          133       137     2012      10        07        281              0.299833      12.235687       0.509060       0.333734       0.140000       0.265100       0.069600       0.841000
56691     56691     guizhou        104.2803       26.8628          133       137     2012      10        08        282              0.292917      13.360809       1.438855       0.331897       0.137500       0.072500       0.108400       0.719000
56691     56691     guizhou        104.2803       26.8628          133       137     2012      10        09        283              0.287000      13.378387       1.884488       0.331393       0.145000   -9999.000000   -9999.000000       0.728000
56691     56691     guizhou        104.2803       26.8628          133       137     2012      10        10        284              0.291833      11.282501       0.681786       0.333255   -9999.000000       0.434200   -9999.000000       0.827000
56691     56691     guizhou        104.2803       26.8628          133       137     2012      10        11        285              0.289583      11.529266       0.000000       0.331085       0.179000   -9999.000000       0.117300   -9999.000000
56691     56691     guizhou        104.2803       26.8628          133       137     2012      10        12        286              0.283417      13.197754      10.054806       0.328156       0.187000       0.239900       0.125400       0.726000
56691     56691     guizhou        104.2803       26.8628          133       137     2012      10        13        287              0.286833      12.608215       0.268299       0.340434       0.173500       0.343200       0.109600   -9999.000000
56691     56691     guizhou        104.2803       26.8628          133       137     2012      10        14        288              0.280750      13.750244       0.000000       0.333147       0.151000   -9999.000000   -9999.000000       0.637000
56691     56691     guizhou        104.2803       26.8628          133       137     2012      10        15        289              0.268417      16.287231       0.000000       0.326799   -9999.000000       0.286700   -9999.000000       0.810000
56691     56691     guizhou        104.2803       26.8628          133       137     2012      10        16        290              0.257917      16.776733       0.510390       0.323348   -9999.000000   -9999.000000   -9999.000000   -9999.000000
56691     56691     guizhou        104.2803       26.8628          133       137     2012      10        17        291              0.253000      13.906219       0.000000       0.323091       0.173500       0.253400       0.130800       0.404000
56691     56691     guizhou        104.2803       26.8628          133       137     2012      10        18        292              0.247583      12.235352       0.000000       0.323432       0.159500       0.274000       0.131100   -9999.000000
56691     56691     guizhou        104.2803       26.8628          133       137     2012      10        19        293              0.242083      14.551849       0.915220       0.320362       0.148500   -9999.000000       0.120800       0.427000
56691     56691     guizhou        104.2803       26.8628          133       137     2012      10        20        294              0.235833      15.387207       0.431459       0.319475   -9999.000000       0.307400   -9999.000000       0.632000
56691     56691     guizhou        104.2803       26.8628          133       137     2012      10        21        295              0.229833      15.848206       0.000000       0.317595   -9999.000000   -9999.000000   -9999.000000   -9999.000000
56691     56691     guizhou        104.2803       26.8628          133       137     2012      10        22        296              0.226833      15.936096       0.435492       0.315892   -9999.000000       0.135800       0.138700       0.265000
56691     56691     guizhou        104.2803       26.8628          133       137     2012      10        23        297              0.222875      14.039825       0.000000       0.317003   -9999.000000       0.341400       0.142400   -9999.000000
56691     56691     guizhou        104.2803       26.8628          133       137     2012      10        24        298              0.221000      14.321777       0.000000       0.313975   -9999.000000   -9999.000000       0.129100       0.385000
56691     56691     guizhou        104.2803       26.8628          133       137     2012      10        25        299              0.000000      12.230835       0.000000       0.314861       0.135000       0.324800   -9999.000000   -9999.000000
56691     56691     guizhou        104.2803       26.8628          133       137     2012      10        26        300              0.213833      14.485413       0.000000       0.311579   -9999.000000       0.146200   -9999.000000       0.478000
56691     56691     guizhou        104.2803       26.8628          133       137     2012      10        27        301              0.211417      14.438538       0.000000       0.310819   -9999.000000   -9999.000000   -9999.000000       0.447000
56691     56691     guizhou        104.2803       26.8628          133       137     2012      10        28        302              0.000000      14.860718       0.000000       0.310504       0.143000       0.334900       0.138200   -9999.000000
56691     56691     guizhou        104.2803       26.8628          133       137     2012      10        29        303              0.206458      15.898254       0.352870       0.308626       0.145000   -9999.000000       0.152200       0.439000
56691     56691     guizhou        104.2803       26.8628          133       137     2012      10        30        304              0.206000      13.552551       0.994445       0.308399       0.144000       0.250700       0.140000   -9999.000000
56691     56691     guizhou        104.2803       26.8628          133       137     2012      10        31        305              0.204333       8.831879       0.513600       0.310473   -9999.000000       0.146200   -9999.000000       0.334000
56691     56691     guizhou        104.2803       26.8628          133       137     2012      11        01        306              0.202417      11.606873       0.458646       0.307192   -9999.000000   -9999.000000   -9999.000000       0.491000
56691     56691     guizhou        104.2803       26.8628          133       137     2012      11        02        307              0.200542      13.132202       0.000000       0.306188       0.195500       0.089000   -9999.000000   -9999.000000
56691     56691     guizhou        104.2803       26.8628          133       137     2012      11        03        308              0.199000      12.469421       0.528860       0.305739       0.183500   -9999.000000       0.148300       0.381000
56691     56691     guizhou        104.2803       26.8628          133       137     2012      11        04        309              0.198167      11.505829       0.000000       0.306418       0.172000       0.058100       0.147600   -9999.000000
56691     56691     guizhou        104.2803       26.8628          133       137     2012      11        05        310              0.197000      11.462067       0.697202       0.307349       0.180000       0.267300       0.127700       0.260000
56691     56691     guizhou        104.2803       26.8628          133       137     2012      11        06        311              0.197000      10.462311       0.412447       0.308839   -9999.000000   -9999.000000   -9999.000000       0.384000
56691     56691     guizhou        104.2803       26.8628          133       137     2012      11        07        312              0.197000       9.447449       0.146147       0.309123       0.207000       0.218900   -9999.000000       0.323000
56691     56691     guizhou        104.2803       26.8628          133       137     2012      11        08        313              0.196417       9.100464       0.169944       0.308953       0.186000       0.220100       0.136700       0.440000
56691     56691     guizhou        104.2803       26.8628          133       137     2012      11        09        314              0.193833      12.066772       0.932464       0.306997       0.176500       0.153800       0.137500   -9999.000000
56691     56691     guizhou        104.2803       26.8628          133       137     2012      11        10        315              0.192348      12.394135       0.187631       0.303700       0.177500       0.225600       0.120900       0.163000
56691     56691     guizhou        104.2803       26.8628          133       137     2012      11        11        316              0.190000      11.953247       0.203826       0.303035   -9999.000000   -9999.000000   -9999.000000   -9999.000000
56691     56691     guizhou        104.2803       26.8628          133       137     2012      11        12        317              0.189500       9.363586       0.128390       0.305742   -9999.000000       0.201200   -9999.000000       0.088000
56691     56691     guizhou        104.2803       26.8628          133       137     2012      11        13        318              0.000000      11.082886       1.911691       0.304496       0.163000   -9999.000000   -9999.000000       0.403000
56691     56691     guizhou        104.2803       26.8628          133       137     2012      11        14        319              0.185917      12.817474       0.000000       0.301902       0.153500   -9999.000000       0.129800   -9999.000000
56691     56691     guizhou        104.2803       26.8628          133       137     2012      11        15        320              0.183375      13.450348       0.463643       0.300121       0.155500       0.285200       0.138200       0.087000
56691     56691     guizhou        104.2803       26.8628          133       137     2012      11        16        321              0.182000      12.432770       1.108494       0.298639   -9999.000000   -9999.000000       0.123800   -9999.000000
56691     56691     guizhou        104.2803       26.8628          133       137     2012      11        17        322              0.000000       7.200348       0.000000       0.301883   -9999.000000       0.104900   -9999.000000       0.100000
56691     56691     guizhou        104.2803       26.8628          133       137     2012      11        18        323              0.180667      10.399658       0.000000       0.300518       0.163000       0.079400   -9999.000000       0.300000
56691     56691     guizhou        104.2803       26.8628          133       137     2012      11        19        324              0.178625      11.171173       0.109203       0.300435       0.163000   -9999.000000       0.129900   -9999.000000
56691     56691     guizhou        104.2803       26.8628          133       137     2012      11        20        325              0.178000      10.907013       0.000000       0.301135       0.152500       0.104300       0.128300       0.123000
56691     56691     guizhou        104.2803       26.8628          133       137     2012      11        21        326              0.176542      12.393524       0.000000       0.299078       0.146000   -9999.000000       0.130200   -9999.000000
56691     56691     guizhou        104.2803       26.8628          133       137     2012      11        22        327              0.176250      12.276184       0.116629       0.298003   -9999.000000       0.149100       0.112500       0.180000
56691     56691     guizhou        104.2803       26.8628          133       137     2012      11        23        328              0.176000       9.430023       0.222452       0.299631   -9999.000000       0.257300   -9999.000000   -9999.000000
56691     56691     guizhou        104.2803       26.8628          133       137     2012      11        24        329              0.176208       6.124054       0.000000       0.303075       0.166500   -9999.000000   -9999.000000       0.318000
56691     56691     guizhou        104.2803       26.8628          133       137     2012      11        25        330              0.174250      11.632538       0.000000       0.300303       0.146000       0.145900       0.127600       0.248000
56691     56691     guizhou        104.2803       26.8628          133       137     2012      11        26        331              0.174000       7.478027       0.538299       0.296514       0.161500   -9999.000000   -9999.000000   -9999.000000
56691     56691     guizhou        104.2803       26.8628          133       137     2012      11        27        332              0.173750       4.388092       0.000000       0.301621   -9999.000000   -9999.000000       0.106900       0.201000
56691     56691     guizhou        104.2803       26.8628          133       137     2012      11        28        333              0.172917       8.835602       0.000000       0.301619   -9999.000000       0.383100   -9999.000000   -9999.000000
56691     56691     guizhou        104.2803       26.8628          133       137     2012      11        29        334              0.172458       8.423889       0.079387       0.301842       0.177000   -9999.000000   -9999.000000       0.069000
56691     56691     guizhou        104.2803       26.8628          133       137     2012      11        30        335              0.171130       8.943298       0.000000       0.299806       0.157000       0.331500   -9999.000000       0.147000
56691     56691     guizhou        104.2803       26.8628          133       137     2012      12        01        336              0.170583       9.581696       0.000000       0.298491       0.149000       0.101900       0.124200   -9999.000000
56691     56691     guizhou        104.2803       26.8628          133       137     2012      12        02        337              0.170917       2.713959       0.368695       0.293656       0.160000   -9999.000000       0.127000       0.223000
56691     56691     guizhou        104.2803       26.8628          133       137     2012      12        03        338              0.171250       7.190704       2.854994       0.300405   -9999.000000       0.191900       0.099900   -9999.000000
56691     56691     guizhou        104.2803       26.8628          133       137     2012      12        04        339              0.171000       4.816742       0.234828       0.303726   -9999.000000   -9999.000000   -9999.000000       0.051000
56691     56691     guizhou        104.2803       26.8628          133       137     2012      12        05        340              0.170833       5.984283       0.178370       0.303490       0.194000       0.220900   -9999.000000       0.014000
56691     56691     guizhou        104.2803       26.8628          133       137     2012      12        06        341              0.170833       4.364716       0.069137       0.304187       0.170500       0.077400       0.113300       0.057000
56691     56691     guizhou        104.2803       26.8628          133       137     2012      12        07        342              0.170750       8.847046       1.047127       0.303051       0.166500   -9999.000000       0.116500       0.144000
56691     56691     guizhou        104.2803       26.8628          133       137     2012      12        08        343              0.171750       6.242371       0.561117       0.304862   -9999.000000       0.290000       0.118000   -9999.000000
56691     56691     guizhou        104.2803       26.8628          133       137     2012      12        09        344              0.172000       5.068085       0.165069       0.306701   -9999.000000   -9999.000000   -9999.000000       0.308000
56691     56691     guizhou        104.2803       26.8628          133       137     2012      12        10        345              0.172000       4.126587       0.135643       0.306850       0.190000       0.193800   -9999.000000   -9999.000000
56691     56691     guizhou        104.2803       26.8628          133       137     2012      12        11        346              0.172000       2.873199       0.133612       0.305553       0.147000       0.126400   -9999.000000       0.085000
56691     56691     guizhou        104.2803       26.8628          133       137     2012      12        12        347              0.171083       5.284607       0.095636       0.306814       0.132500   -9999.000000       0.101200       0.260000
56691     56691     guizhou        104.2803       26.8628          133       137     2012      12        13        348              0.169208       8.900879       0.049679       0.304177   -9999.000000       0.284600       0.114100   -9999.000000
56691     56691     guizhou        104.2803       26.8628          133       137     2012      12        14        349              0.168000       9.122467       3.349160       0.301007   -9999.000000   -9999.000000       0.096500       0.019000
56691     56691     guizhou        104.2803       26.8628          133       137     2012      12        15        350              0.000000       9.088074       0.000000       0.299321   -9999.000000       0.190200   -9999.000000   -9999.000000
56691     56691     guizhou        104.2803       26.8628          133       137     2012      12        16        351              0.166333       9.333557       0.488335       0.298695       0.139000       0.269900   -9999.000000       0.076000
56691     56691     guizhou        104.2803       26.8628          133       137     2012      12        17        352              0.166000       9.439880       0.503623       0.297816       0.124000   -9999.000000   -9999.000000       0.101000
56691     56691     guizhou        104.2803       26.8628          133       137     2012      12        18        353              0.166000       3.434113       0.240612       0.299726       0.140000       0.161000       0.107100   -9999.000000
56691     56691     guizhou        104.2803       26.8628          133       137     2012      12        19        354              0.164750       6.396576       0.000000       0.301127   -9999.000000       0.038000       0.109700       0.179000
56691     56691     guizhou        104.2803       26.8628          133       137     2012      12        20        355              0.000000       8.268829       0.503972       0.299280   -9999.000000   -9999.000000       0.090000   -9999.000000
56691     56691     guizhou        104.2803       26.8628          133       137     2012      12        21        356              0.163500       5.920197       0.182162       0.293598       0.163000       0.132500   -9999.000000       0.076000
56691     56691     guizhou        104.2803       26.8628          133       137     2012      12        22        357              0.163000       2.494385       0.243698       0.282505       0.147000   -9999.000000   -9999.000000   -9999.000000
56691     56691     guizhou        104.2803       26.8628          133       137     2012      12        23        358              0.163500       0.466431       0.935677       0.244261   -9999.000000       0.175600       0.104200       0.042000
56691     56691     guizhou        104.2803       26.8628          133       137     2012      12        24        359              0.163900       0.534760       0.344031       0.233174   -9999.000000       0.049100       0.112900       0.303000
56691     56691     guizhou        104.2803       26.8628          133       137     2012      12        25        360              0.163125       5.228821       0.000000       0.293630   -9999.000000   -9999.000000       0.097900   -9999.000000
56691     56691     guizhou        104.2803       26.8628          133       137     2012      12        26        361              0.000000       3.590271       0.439504       0.289456       0.175000   -9999.000000   -9999.000000       0.062000
56691     56691     guizhou        104.2803       26.8628          133       137     2012      12        27        362              0.163000       4.133728       0.995274       0.292725       0.148000   -9999.000000   -9999.000000   -9999.000000
56691     56691     guizhou        104.2803       26.8628          133       137     2012      12        28        363              0.000000       6.547913       0.000000       0.302579       0.140000   -9999.000000   -9999.000000       0.097000
56691     56691     guizhou        104.2803       26.8628          133       137     2012      12        29        364              0.000000       6.370483       0.000000       0.288547   -9999.000000   -9999.000000       0.109400   -9999.000000
56691     56691     guizhou        104.2803       26.8628          133       137     2012      12        30        365              0.000000      -2.359314       0.000000       0.182844   -9999.000000   -9999.000000       0.110300   -9999.000000
56691     56691     guizhou        104.2803       26.8628          133       137     2012      12        31        366              0.162200      -3.334839       0.393223       0.145924   -9999.000000       0.202100       0.079000   -9999.000000
