# Supplementary material for: Research on Fusing Multisatellite Soil Moisture Data Based on Bayesian Model Averaging
Source: Hindawi journal article supplement (doi:10.1155/2018/9310838), 2018-06-25
Supplement: f1 [file 9310838.f1.zip › 2012_sm00-10cm_daily_ZDB_ZHY_56693_366days_allin.txt]

56693     56693     guizhou        104.8628       26.5853          134       139     2012      01        01        001              0.000000   -9999.000000       0.612095   -9999.000000       0.172000       0.057000   -9999.000000   -9999.000000
56693     56693     guizhou        104.8628       26.5853          134       139     2012      01        02        002              0.159625       0.974854       0.823673       0.238680   -9999.000000       0.059200   -9999.000000   -9999.000000
56693     56693     guizhou        104.8628       26.5853          134       139     2012      01        03        003              0.000000       1.698944       1.119736       0.272219   -9999.000000   -9999.000000       0.034200       0.086000
56693     56693     guizhou        104.8628       26.5853          134       139     2012      01        04        004              0.165609       0.850189       1.029561       0.250292   -9999.000000   -9999.000000       0.034500       0.171000
56693     56693     guizhou        104.8628       26.5853          134       139     2012      01        05        005              0.163083       0.840668       1.293850       0.244877       0.172000   -9999.000000       0.036000   -9999.000000
56693     56693     guizhou        104.8628       26.5853          134       139     2012      01        06        006              0.162737       1.472046       0.201055       0.268602       0.153000   -9999.000000   -9999.000000       0.028000
56693     56693     guizhou        104.8628       26.5853          134       139     2012      01        07        007              0.162750       1.896973       0.656014       0.279881   -9999.000000   -9999.000000   -9999.000000   -9999.000000
56693     56693     guizhou        104.8628       26.5853          134       139     2012      01        08        008              0.000000       1.681000       0.398886       0.280830   -9999.000000   -9999.000000   -9999.000000       0.304000
56693     56693     guizhou        104.8628       26.5853          134       139     2012      01        09        009              0.160333       2.512146       0.247684       0.289810       0.190500   -9999.000000       0.043700       0.276000
56693     56693     guizhou        104.8628       26.5853          134       139     2012      01        10        010              0.162909       3.120544       0.202398       0.299700       0.155000   -9999.000000       0.055800       0.078000
56693     56693     guizhou        104.8628       26.5853          134       139     2012      01        11        011              0.162087       2.861023       0.314379       0.298163       0.157000   -9999.000000       0.049400       0.220000
56693     56693     guizhou        104.8628       26.5853          134       139     2012      01        12        012              0.157792       1.762634       1.282352       0.289514   -9999.000000   -9999.000000   -9999.000000   -9999.000000
56693     56693     guizhou        104.8628       26.5853          134       139     2012      01        13        013              0.154636       7.778748       0.137524       0.305073   -9999.000000   -9999.000000   -9999.000000       0.293000
56693     56693     guizhou        104.8628       26.5853          134       139     2012      01        14        014              0.000000       7.586273       0.532346       0.307669   -9999.000000   -9999.000000       0.060600   -9999.000000
56693     56693     guizhou        104.8628       26.5853          134       139     2012      01        15        015              0.170000       6.057343       0.284824       0.308207       0.158000   -9999.000000       0.053100       0.140000
56693     56693     guizhou        104.8628       26.5853          134       139     2012      01        16        016              0.000000       3.570770       0.448461       0.303956       0.144000   -9999.000000       0.060000       0.233000
56693     56693     guizhou        104.8628       26.5853          134       139     2012      01        17        017              0.000000       7.989105       0.453968       0.303858       0.130000       0.149300   -9999.000000   -9999.000000
56693     56693     guizhou        104.8628       26.5853          134       139     2012      01        18        018              0.000000       4.011475       0.235488       0.303597   -9999.000000   -9999.000000   -9999.000000       0.147000
56693     56693     guizhou        104.8628       26.5853          134       139     2012      01        19        019              0.000000       4.291260       0.161288       0.303423       0.159000       0.036300   -9999.000000   -9999.000000
56693     56693     guizhou        104.8628       26.5853          134       139     2012      01        20        020              0.149118       7.029694       1.782368       0.303395       0.162500       0.122100       0.062800       0.020000
56693     56693     guizhou        104.8628       26.5853          134       139     2012      01        21        021              0.149417       7.916077       0.497388       0.301726       0.136500   -9999.000000       0.067000       0.093000
56693     56693     guizhou        104.8628       26.5853          134       139     2012      01        22        022              0.153583       4.490784       0.226333       0.293845   -9999.000000   -9999.000000       0.060700   -9999.000000
56693     56693     guizhou        104.8628       26.5853          134       139     2012      01        23        023              0.159909       1.477722       0.299456       0.266974   -9999.000000   -9999.000000   -9999.000000       0.187000
56693     56693     guizhou        104.8628       26.5853          134       139     2012      01        24        024              0.162400       1.832916       0.000000       0.270375   -9999.000000   -9999.000000   -9999.000000   -9999.000000
56693     56693     guizhou        104.8628       26.5853          134       139     2012      01        25        025              0.162625       0.719727       9.919209       0.237681   -9999.000000       0.019400   -9999.000000       0.022000
56693     56693     guizhou        104.8628       26.5853          134       139     2012      01        26        026              0.162583       0.085358       0.254755       0.213113   -9999.000000   -9999.000000       0.042900   -9999.000000
56693     56693     guizhou        104.8628       26.5853          134       139     2012      01        27        027              0.161792       0.682800       0.295483       0.230503       0.114000   -9999.000000       0.046100       0.054000
56693     56693     guizhou        104.8628       26.5853          134       139     2012      01        28        028              0.161167       1.913116       0.000000       0.260781   -9999.000000   -9999.000000       0.037300       0.016000
56693     56693     guizhou        104.8628       26.5853          134       139     2012      01        29        029              0.162792       1.305359       4.730168       0.255156   -9999.000000       0.096500   -9999.000000   -9999.000000
56693     56693     guizhou        104.8628       26.5853          134       139     2012      01        30        030              0.161625       1.639038       0.124839       0.264647       0.151000   -9999.000000   -9999.000000       0.087000
56693     56693     guizhou        104.8628       26.5853          134       139     2012      01        31        031              0.161043       1.452484       0.167853       0.261005       0.120000   -9999.000000       0.066500   -9999.000000
56693     56693     guizhou        104.8628       26.5853          134       139     2012      02        01        032              0.158308       2.208160       0.505875       0.281460       0.118000   -9999.000000       0.067200       0.290000
56693     56693     guizhou        104.8628       26.5853          134       139     2012      02        02        033              0.168955       4.282684       0.188019       0.297997       0.120000   -9999.000000       0.063900       0.173000
56693     56693     guizhou        104.8628       26.5853          134       139     2012      02        03        034              0.161087       2.270630       0.162490       0.289497   -9999.000000   -9999.000000   -9999.000000   -9999.000000
56693     56693     guizhou        104.8628       26.5853          134       139     2012      02        04        035              0.157833       5.024292       0.000000       0.299452       0.116000   -9999.000000   -9999.000000       0.046000
56693     56693     guizhou        104.8628       26.5853          134       139     2012      02        05        036              0.150333       9.950928       0.000000       0.300367       0.121000   -9999.000000   -9999.000000   -9999.000000
56693     56693     guizhou        104.8628       26.5853          134       139     2012      02        06        037              0.143471      11.024048       0.000000       0.297263       0.120000       0.009800       0.071100   -9999.000000
56693     56693     guizhou        104.8628       26.5853          134       139     2012      02        07        038              0.140750       5.849426       0.184965       0.298171   -9999.000000       0.006200       0.080400       0.039000
56693     56693     guizhou        104.8628       26.5853          134       139     2012      02        08        039              0.000000       3.312378       0.196686       0.296636   -9999.000000   -9999.000000       0.072500       0.148000
56693     56693     guizhou        104.8628       26.5853          134       139     2012      02        09        040              0.150100       2.286407       0.854598       0.287566   -9999.000000   -9999.000000   -9999.000000       0.242000
56693     56693     guizhou        104.8628       26.5853          134       139     2012      02        10        041              0.151167       6.264984       0.263633       0.296991   -9999.000000   -9999.000000   -9999.000000   -9999.000000
56693     56693     guizhou        104.8628       26.5853          134       139     2012      02        11        042              0.151417       2.055145       0.142788       0.277694       0.143000   -9999.000000   -9999.000000       0.082000
56693     56693     guizhou        104.8628       26.5853          134       139     2012      02        12        043              0.148333       4.949402       0.244636       0.294702       0.138000   -9999.000000       0.057800   -9999.000000
56693     56693     guizhou        104.8628       26.5853          134       139     2012      02        13        044              0.142458      12.255981       0.000000       0.296362   -9999.000000   -9999.000000       0.057700       0.080000
56693     56693     guizhou        104.8628       26.5853          134       139     2012      02        14        045              0.138800      13.705139       0.640462       0.291763   -9999.000000       0.239800   -9999.000000       0.020000
56693     56693     guizhou        104.8628       26.5853          134       139     2012      02        15        046              0.000000      13.097046       0.188299       0.287890       0.158000   -9999.000000   -9999.000000   -9999.000000
56693     56693     guizhou        104.8628       26.5853          134       139     2012      02        16        047              0.000000       6.762207       0.138204       0.290616       0.134500       0.004700   -9999.000000       0.041000
56693     56693     guizhou        104.8628       26.5853          134       139     2012      02        17        048              0.000000       3.836761       1.352623       0.293307       0.121000   -9999.000000       0.067400   -9999.000000
56693     56693     guizhou        104.8628       26.5853          134       139     2012      02        18        049              0.000000       3.030487       0.000000       0.282726   -9999.000000   -9999.000000       0.064900       0.027000
56693     56693     guizhou        104.8628       26.5853          134       139     2012      02        19        050              0.146400       2.067596       0.875020       0.268621   -9999.000000   -9999.000000       0.061400       0.264000
56693     56693     guizhou        104.8628       26.5853          134       139     2012      02        20        051              0.143682       5.856720       0.684211       0.293430       0.145000   -9999.000000   -9999.000000   -9999.000000
56693     56693     guizhou        104.8628       26.5853          134       139     2012      02        21        052              0.140182      10.959076       0.609282       0.293518       0.113000   -9999.000000   -9999.000000       0.142000
56693     56693     guizhou        104.8628       26.5853          134       139     2012      02        22        053              0.139750      11.989166       0.199709       0.290476       0.109500       0.021200   -9999.000000   -9999.000000
56693     56693     guizhou        104.8628       26.5853          134       139     2012      02        23        054              0.000000      12.945923       0.072122       0.286627       0.102000   -9999.000000       0.064800       0.018000
56693     56693     guizhou        104.8628       26.5853          134       139     2012      02        24        055              0.000000      10.945984       4.629144       0.286641   -9999.000000       0.057500       0.075100       0.087000
56693     56693     guizhou        104.8628       26.5853          134       139     2012      02        25        056              0.000000       8.780121       0.266516       0.288333       0.126000   -9999.000000       0.066800       0.170000
56693     56693     guizhou        104.8628       26.5853          134       139     2012      02        26        057              0.000000       4.955627       0.201835       0.289937       0.119000   -9999.000000   -9999.000000       0.120000
56693     56693     guizhou        104.8628       26.5853          134       139     2012      02        27        058              0.000000       2.872864       0.323811       0.277699   -9999.000000       0.080000   -9999.000000   -9999.000000
56693     56693     guizhou        104.8628       26.5853          134       139     2012      02        28        059              0.000000       2.511932       0.722593       0.282274       0.095000   -9999.000000   -9999.000000       0.153000
56693     56693     guizhou        104.8628       26.5853          134       139     2012      02        29        060              0.000000   -9999.000000       0.793457   -9999.000000   -9999.000000   -9999.000000   -9999.000000   -9999.000000
56693     56693     guizhou        104.8628       26.5853          134       139     2012      03        01        061              0.000000       6.610657       0.356784       0.294698   -9999.000000   -9999.000000       0.066800       0.260000
56693     56693     guizhou        104.8628       26.5853          134       139     2012      03        02        062              0.000000      11.109863       1.206317       0.290493       0.127000   -9999.000000       0.058300       0.112000
56693     56693     guizhou        104.8628       26.5853          134       139     2012      03        03        063              0.168400      12.561798      11.318899       0.288558       0.143000       0.112800   -9999.000000   -9999.000000
56693     56693     guizhou        104.8628       26.5853          134       139     2012      03        04        064              0.155667       9.983795       0.000000       0.321419       0.124500   -9999.000000   -9999.000000       0.045000
56693     56693     guizhou        104.8628       26.5853          134       139     2012      03        05        065              0.149909      12.420471       0.000000       0.303240   -9999.000000       0.048800       0.067800   -9999.000000
56693     56693     guizhou        104.8628       26.5853          134       139     2012      03        06        066              0.142000      14.238678       0.550029       0.294325   -9999.000000       0.035300       0.072900       0.083000
56693     56693     guizhou        104.8628       26.5853          134       139     2012      03        07        067              0.000000      13.008209       1.245013       0.290129       0.135500   -9999.000000       0.060600       0.055000
56693     56693     guizhou        104.8628       26.5853          134       139     2012      03        08        068              0.000000       9.205627       0.321881       0.292028       0.128000       0.110300   -9999.000000       0.053000
56693     56693     guizhou        104.8628       26.5853          134       139     2012      03        09        069              0.000000       8.081696       0.235778       0.291430       0.135500   -9999.000000   -9999.000000       0.004000
56693     56693     guizhou        104.8628       26.5853          134       139     2012      03        10        070              0.000000       3.906799       0.621898       0.288427   -9999.000000   -9999.000000   -9999.000000   -9999.000000
56693     56693     guizhou        104.8628       26.5853          134       139     2012      03        11        071              0.000000       3.369720       0.330263       0.292303   -9999.000000       0.108400       0.073900       0.134000
56693     56693     guizhou        104.8628       26.5853          134       139     2012      03        12        072              0.000000       5.366058       0.145816       0.295539   -9999.000000   -9999.000000       0.083300   -9999.000000
56693     56693     guizhou        104.8628       26.5853          134       139     2012      03        13        073              0.000000       4.631348       0.061022       0.296476       0.140500       0.039900       0.075200       0.108000
56693     56693     guizhou        104.8628       26.5853          134       139     2012      03        14        074              0.139500       5.639008       0.000000       0.296337       0.128500       0.024500   -9999.000000       0.322000
56693     56693     guizhou        104.8628       26.5853          134       139     2012      03        15        075              0.000000      14.051117       0.000000       0.289623       0.121000   -9999.000000   -9999.000000   -9999.000000
56693     56693     guizhou        104.8628       26.5853          134       139     2012      03        16        076              0.000000      16.575592       0.000000       0.281140   -9999.000000   -9999.000000       0.071500       0.195000
56693     56693     guizhou        104.8628       26.5853          134       139     2012      03        17        077              0.000000      17.456573       0.480681       0.274416       0.123000   -9999.000000       0.071000   -9999.000000
56693     56693     guizhou        104.8628       26.5853          134       139     2012      03        18        078              0.000000      16.679108       0.000000       0.270274       0.121500   -9999.000000       0.069200       0.108000
56693     56693     guizhou        104.8628       26.5853          134       139     2012      03        19        079              0.000000      17.269806       0.000000       0.264764       0.116500       0.004300       0.062000       0.027000
56693     56693     guizhou        104.8628       26.5853          134       139     2012      03        20        080              0.000000      18.387695       0.000000       0.258430       0.114000   -9999.000000   -9999.000000   -9999.000000
56693     56693     guizhou        104.8628       26.5853          134       139     2012      03        21        081              0.000000      19.714294       0.000000       0.253375   -9999.000000       0.049700   -9999.000000       0.210000
56693     56693     guizhou        104.8628       26.5853          134       139     2012      03        22        082              0.000000      20.133362       0.000000       0.247787   -9999.000000   -9999.000000       0.066800   -9999.000000
56693     56693     guizhou        104.8628       26.5853          134       139     2012      03        23        083              0.000000      16.084717       0.000000       0.248327       0.134000   -9999.000000       0.071800       0.035000
56693     56693     guizhou        104.8628       26.5853          134       139     2012      03        24        084              0.000000       5.904358       0.000000       0.257009       0.117000   -9999.000000       0.059500   -9999.000000
56693     56693     guizhou        104.8628       26.5853          134       139     2012      03        25        085              0.000000      12.766815       2.351237       0.254470       0.113500   -9999.000000   -9999.000000       0.008000
56693     56693     guizhou        104.8628       26.5853          134       139     2012      03        26        086              0.000000      14.593170       2.240917       0.259565   -9999.000000       0.042200   -9999.000000       0.285000
56693     56693     guizhou        104.8628       26.5853          134       139     2012      03        27        087              0.000000      10.895264      14.426639       0.277395   -9999.000000   -9999.000000   -9999.000000   -9999.000000
56693     56693     guizhou        104.8628       26.5853          134       139     2012      03        28        088              0.000000      12.512299       0.273236       0.310506       0.157000       0.044300       0.078400       0.328000
56693     56693     guizhou        104.8628       26.5853          134       139     2012      03        29        089              0.000000      15.516876       0.086547       0.307307       0.153000   -9999.000000       0.079200   -9999.000000
56693     56693     guizhou        104.8628       26.5853          134       139     2012      03        30        090              0.000000      13.159088       1.728366       0.298240       0.147000   -9999.000000       0.070500       0.163000
56693     56693     guizhou        104.8628       26.5853          134       139     2012      03        31        091              0.000000       9.601013       0.244212       0.297430       0.141000       0.101200   -9999.000000       0.481000
56693     56693     guizhou        104.8628       26.5853          134       139     2012      04        01        092              0.000000       9.051849       0.064747       0.297853   -9999.000000       0.106600   -9999.000000   -9999.000000
56693     56693     guizhou        104.8628       26.5853          134       139     2012      04        02        093              0.000000      16.278656       0.000000       0.287088       0.128000   -9999.000000       0.070700       0.007000
56693     56693     guizhou        104.8628       26.5853          134       139     2012      04        03        094              0.000000      19.622742       0.886602       0.276308       0.118000   -9999.000000       0.063800   -9999.000000
56693     56693     guizhou        104.8628       26.5853          134       139     2012      04        04        095              0.000000      17.790710       0.000000       0.279732       0.115500   -9999.000000       0.063700       0.161000
56693     56693     guizhou        104.8628       26.5853          134       139     2012      04        05        096              0.000000      18.601135       4.232702       0.270983       0.111000       0.035800   -9999.000000       0.062000
56693     56693     guizhou        104.8628       26.5853          134       139     2012      04        06        097              0.000000      15.987579       0.200129       0.279787   -9999.000000       0.121400   -9999.000000       0.172000
56693     56693     guizhou        104.8628       26.5853          134       139     2012      04        07        098              0.000000      11.118042       1.810405       0.290225   -9999.000000   -9999.000000   -9999.000000       0.531000
56693     56693     guizhou        104.8628       26.5853          134       139     2012      04        08        099              0.158000      10.081146      10.105535       0.293763       0.162000       0.199900       0.080300   -9999.000000
56693     56693     guizhou        104.8628       26.5853          134       139     2012      04        09        100              0.147500      10.583862       0.595329       0.316885       0.124500   -9999.000000       0.082300       0.425000
56693     56693     guizhou        104.8628       26.5853          134       139     2012      04        10        101              0.141000      16.822998       0.902677       0.304333       0.115500       0.123000       0.062500   -9999.000000
56693     56693     guizhou        104.8628       26.5853          134       139     2012      04        11        102              0.000000      18.095947       0.000000       0.295014   -9999.000000       0.060500   -9999.000000       0.213000
56693     56693     guizhou        104.8628       26.5853          134       139     2012      04        12        103              0.000000      19.882141       0.871316       0.285417   -9999.000000   -9999.000000   -9999.000000       0.245000
56693     56693     guizhou        104.8628       26.5853          134       139     2012      04        13        104              0.000000      16.974243       1.889816       0.284862       0.120500       0.130800   -9999.000000   -9999.000000
56693     56693     guizhou        104.8628       26.5853          134       139     2012      04        14        105              0.000000      13.946014       0.034607       0.282890       0.106000   -9999.000000       0.066300       0.271000
56693     56693     guizhou        104.8628       26.5853          134       139     2012      04        15        106              0.000000      20.153564       0.000000       0.272789       0.105500   -9999.000000       0.066600   -9999.000000
56693     56693     guizhou        104.8628       26.5853          134       139     2012      04        16        107              0.000000      19.415283       0.000000       0.264358   -9999.000000   -9999.000000       0.058500       0.244000
56693     56693     guizhou        104.8628       26.5853          134       139     2012      04        17        108              0.000000      14.959106       0.000000       0.268199   -9999.000000   -9999.000000   -9999.000000       0.235000
56693     56693     guizhou        104.8628       26.5853          134       139     2012      04        18        109              0.000000      18.223541       0.000000       0.262202       0.116000   -9999.000000   -9999.000000   -9999.000000
56693     56693     guizhou        104.8628       26.5853          134       139     2012      04        19        110              0.000000      17.699677       1.484211       0.260646       0.114000   -9999.000000       0.083700       0.318000
56693     56693     guizhou        104.8628       26.5853          134       139     2012      04        20        111              0.000000      17.451630       1.025830       0.267256       0.109000   -9999.000000       0.064500   -9999.000000
56693     56693     guizhou        104.8628       26.5853          134       139     2012      04        21        112              0.000000      17.933563       7.657178       0.264223       0.091000       0.073900       0.068900       0.556000
56693     56693     guizhou        104.8628       26.5853          134       139     2012      04        22        113              0.000000      19.145599       0.437607       0.285431   -9999.000000   -9999.000000   -9999.000000   -9999.000000
56693     56693     guizhou        104.8628       26.5853          134       139     2012      04        23        114              0.000000      19.932190       0.000000       0.280777       0.095000       0.059400   -9999.000000       0.137000
56693     56693     guizhou        104.8628       26.5853          134       139     2012      04        24        115              0.000000      22.224548       1.333081       0.261211       0.098000       0.012000   -9999.000000       0.326000
56693     56693     guizhou        104.8628       26.5853          134       139     2012      04        25        116              0.000000      22.169922       0.248828       0.258884       0.103000   -9999.000000       0.082200   -9999.000000
56693     56693     guizhou        104.8628       26.5853          134       139     2012      04        26        117              0.000000      15.374420       4.066797       0.260959       0.089000       0.021500       0.088300       0.444000
56693     56693     guizhou        104.8628       26.5853          134       139     2012      04        27        118              0.000000      17.913391       0.115755       0.276018   -9999.000000   -9999.000000       0.070600   -9999.000000
56693     56693     guizhou        104.8628       26.5853          134       139     2012      04        28        119              0.000000      20.649658       0.466235       0.266163   -9999.000000   -9999.000000   -9999.000000       0.142000
56693     56693     guizhou        104.8628       26.5853          134       139     2012      04        29        120              0.000000      20.907196       0.000000       0.259392       0.099500   -9999.000000   -9999.000000       0.357000
56693     56693     guizhou        104.8628       26.5853          134       139     2012      04        30        121              0.000000      21.700134       0.102057       0.251047       0.090000   -9999.000000   -9999.000000   -9999.000000
56693     56693     guizhou        104.8628       26.5853          134       139     2012      05        01        122              0.000000      23.864288       0.000000       0.236871       0.111000       0.052500       0.080000       0.030000
56693     56693     guizhou        104.8628       26.5853          134       139     2012      05        02        123              0.000000      22.153290       0.000000       0.230484   -9999.000000   -9999.000000       0.086000   -9999.000000
56693     56693     guizhou        104.8628       26.5853          134       139     2012      05        03        124              0.000000      21.924103       0.000000       0.228376   -9999.000000   -9999.000000       0.074500       0.191000
56693     56693     guizhou        104.8628       26.5853          134       139     2012      05        04        125              0.000000      23.690033       0.000000       0.218853       0.125500       0.245500   -9999.000000       0.303000
56693     56693     guizhou        104.8628       26.5853          134       139     2012      05        05        126              0.000000      22.346558       0.000000       0.217652       0.118500   -9999.000000   -9999.000000       0.252000
56693     56693     guizhou        104.8628       26.5853          134       139     2012      05        06        127              0.000000      22.485046       0.135870       0.217425       0.111500   -9999.000000       0.088300       0.297000
56693     56693     guizhou        104.8628       26.5853          134       139     2012      05        07        128              0.000000      22.125824       0.000000       0.218031   -9999.000000   -9999.000000       0.086000   -9999.000000
56693     56693     guizhou        104.8628       26.5853          134       139     2012      05        08        129              0.000000      22.997284       7.972963       0.214388   -9999.000000   -9999.000000       0.098300       0.857000
56693     56693     guizhou        104.8628       26.5853          134       139     2012      05        09        130              0.000000      20.887085       9.011508       0.263921   -9999.000000       0.234500   -9999.000000   -9999.000000
56693     56693     guizhou        104.8628       26.5853          134       139     2012      05        10        131              0.000000      22.177887       0.446793       0.275189       0.135000   -9999.000000   -9999.000000       0.469000
56693     56693     guizhou        104.8628       26.5853          134       139     2012      05        11        132              0.000000      22.913666       1.822419       0.288149       0.133500       0.229000   -9999.000000       0.547000
56693     56693     guizhou        104.8628       26.5853          134       139     2012      05        12        133              0.000000      23.706909       1.648396       0.275540       0.129000       0.246600       0.099700   -9999.000000
56693     56693     guizhou        104.8628       26.5853          134       139     2012      05        13        134              0.000000      19.156281       1.616070       0.273191   -9999.000000   -9999.000000       0.110300       0.430000
56693     56693     guizhou        104.8628       26.5853          134       139     2012      05        14        135              0.000000      19.700409       0.430816       0.274663       0.171000       0.064000       0.080400   -9999.000000
56693     56693     guizhou        104.8628       26.5853          134       139     2012      05        15        136              0.000000      16.251770       0.000000       0.270121       0.147500   -9999.000000   -9999.000000       0.233000
56693     56693     guizhou        104.8628       26.5853          134       139     2012      05        16        137              0.000000      16.546478       1.380634       0.264594       0.151500   -9999.000000   -9999.000000       0.201000
56693     56693     guizhou        104.8628       26.5853          134       139     2012      05        17        138              0.000000      16.993530       1.720564       0.265524       0.136500   -9999.000000   -9999.000000   -9999.000000
56693     56693     guizhou        104.8628       26.5853          134       139     2012      05        18        139              0.000000      19.647034      16.897890       0.264119   -9999.000000   -9999.000000       0.090600       0.352000
56693     56693     guizhou        104.8628       26.5853          134       139     2012      05        19        140              0.000000      22.318115       8.009488       0.295405   -9999.000000       0.014600       0.091400   -9999.000000
56693     56693     guizhou        104.8628       26.5853          134       139     2012      05        20        141              0.000000      23.161224       1.083459       0.308544       0.147000   -9999.000000       0.076700       0.456000
56693     56693     guizhou        104.8628       26.5853          134       139     2012      05        21        142              0.000000      22.263031      17.003361       0.304920       0.105000   -9999.000000   -9999.000000   -9999.000000
56693     56693     guizhou        104.8628       26.5853          134       139     2012      05        22        143              0.000000      22.347137       1.513915       0.314308       0.151000       0.264700   -9999.000000       0.897000
56693     56693     guizhou        104.8628       26.5853          134       139     2012      05        23        144              0.000000      16.692230       2.278899       0.323852   -9999.000000   -9999.000000       0.078800       0.970000
56693     56693     guizhou        104.8628       26.5853          134       139     2012      05        24        145              0.000000      16.582367       0.797142       0.315094   -9999.000000       0.210300       0.082100   -9999.000000
56693     56693     guizhou        104.8628       26.5853          134       139     2012      05        25        146              0.000000      15.449432       0.584966       0.309942       0.149500   -9999.000000       0.077400       0.747000
56693     56693     guizhou        104.8628       26.5853          134       139     2012      05        26        147              0.000000      14.864319       1.698628       0.305800       0.126500   -9999.000000   -9999.000000   -9999.000000
56693     56693     guizhou        104.8628       26.5853          134       139     2012      05        27        148              0.000000      19.252899      31.843958       0.301456       0.109000       0.204300   -9999.000000       0.437000
56693     56693     guizhou        104.8628       26.5853          134       139     2012      05        28        149              0.000000      19.942596      11.285131       0.319842       0.128000   -9999.000000   -9999.000000       1.000000
56693     56693     guizhou        104.8628       26.5853          134       139     2012      05        29        150              0.246130      19.811371      14.322987       0.349936   -9999.000000       0.204500       0.073200   -9999.000000
56693     56693     guizhou        104.8628       26.5853          134       139     2012      05        30        151              0.229542      16.600525       0.240239       0.349365       0.132000       0.290700       0.075800   -9999.000000
56693     56693     guizhou        104.8628       26.5853          134       139     2012      05        31        152              0.225167      17.458313       6.835742       0.328042       0.148000   -9999.000000       0.064300   -9999.000000
56693     56693     guizhou        104.8628       26.5853          134       139     2012      06        01        153              0.246875      17.283142       9.545993       0.327851       0.216000       0.296200   -9999.000000       0.821000
56693     56693     guizhou        104.8628       26.5853          134       139     2012      06        02        154              0.240125      15.199463       0.937316       0.340769       0.184000   -9999.000000   -9999.000000       0.910000
56693     56693     guizhou        104.8628       26.5853          134       139     2012      06        03        155              0.242833      16.629395      29.448532       0.332499   -9999.000000       0.089100   -9999.000000       0.923000
56693     56693     guizhou        104.8628       26.5853          134       139     2012      06        04        156              0.240333      16.025116       0.168430       0.349356   -9999.000000   -9999.000000       0.082800       0.954000
56693     56693     guizhou        104.8628       26.5853          134       139     2012      06        05        157              0.233773      16.083435       0.496868       0.341632       0.174000   -9999.000000       0.076900   -9999.000000
56693     56693     guizhou        104.8628       26.5853          134       139     2012      06        06        158              0.242250      19.862671       6.007848       0.327471       0.172500       0.058700       0.072000       0.859000
56693     56693     guizhou        104.8628       26.5853          134       139     2012      06        07        159              0.238500      19.177887       2.090620       0.329256       0.147000   -9999.000000   -9999.000000   -9999.000000
56693     56693     guizhou        104.8628       26.5853          134       139     2012      06        08        160              0.237083      18.853760       1.094323       0.328314   -9999.000000   -9999.000000   -9999.000000       0.831000
56693     56693     guizhou        104.8628       26.5853          134       139     2012      06        09        161              0.239857      18.648834       7.375889       0.324837   -9999.000000       0.285800       0.073600       0.963000
56693     56693     guizhou        104.8628       26.5853          134       139     2012      06        10        162              0.248083      21.411621       5.678504       0.329772       0.191500   -9999.000000       0.082300   -9999.000000
56693     56693     guizhou        104.8628       26.5853          134       139     2012      06        11        163              0.000000      19.483368       2.525500       0.330398       0.160000   -9999.000000       0.038500       0.736000
56693     56693     guizhou        104.8628       26.5853          134       139     2012      06        12        164              0.238458      18.210327       2.816954       0.327302       0.157000   -9999.000000   -9999.000000   -9999.000000
56693     56693     guizhou        104.8628       26.5853          134       139     2012      06        13        165              0.246417      17.279907       8.248560       0.325069   -9999.000000   -9999.000000   -9999.000000       0.814000
56693     56693     guizhou        104.8628       26.5853          134       139     2012      06        14        166              0.245667      18.844574       0.597445       0.331955   -9999.000000       0.172500   -9999.000000       0.963000
56693     56693     guizhou        104.8628       26.5853          134       139     2012      06        15        167              0.235083      17.665619       0.000000       0.326475       0.136000   -9999.000000       0.036900   -9999.000000
56693     56693     guizhou        104.8628       26.5853          134       139     2012      06        16        168              0.228083      18.489410       0.915994       0.317133       0.148500       0.134500       0.042900       0.744000
56693     56693     guizhou        104.8628       26.5853          134       139     2012      06        17        169              0.221625      18.478699       1.200259       0.314506       0.146500       0.091700       0.039900   -9999.000000
56693     56693     guizhou        104.8628       26.5853          134       139     2012      06        18        170              0.236083      18.343811      24.170618       0.312764       0.131000   -9999.000000   -9999.000000       0.975000
56693     56693     guizhou        104.8628       26.5853          134       139     2012      06        19        171              0.255000      18.361755       0.729489       0.335838   -9999.000000       0.201700   -9999.000000   -9999.000000
56693     56693     guizhou        104.8628       26.5853          134       139     2012      06        20        172              0.241167      17.292908       1.284347       0.339548   -9999.000000   -9999.000000       0.059500       0.719000
56693     56693     guizhou        104.8628       26.5853          134       139     2012      06        21        173              0.256917      19.673523      19.828728       0.324901       0.175000   -9999.000000       0.060900       1.000000
56693     56693     guizhou        104.8628       26.5853          134       139     2012      06        22        174              0.256458      17.699341       2.410638       0.348149       0.152000   -9999.000000       0.053300   -9999.000000
56693     56693     guizhou        104.8628       26.5853          134       139     2012      06        23        175              0.240500      18.069519       4.718404       0.339830       0.128000   -9999.000000       0.041500       0.611000
56693     56693     guizhou        104.8628       26.5853          134       139     2012      06        24        176              0.257958      21.381714      17.653854       0.328496   -9999.000000       0.063400   -9999.000000   -9999.000000
56693     56693     guizhou        104.8628       26.5853          134       139     2012      06        25        177              0.247125      20.023285       0.167200       0.350772   -9999.000000   -9999.000000   -9999.000000       0.784000
56693     56693     guizhou        104.8628       26.5853          134       139     2012      06        26        178              0.238458      21.458588       2.641926       0.331072       0.161000   -9999.000000       0.067400       0.822000
56693     56693     guizhou        104.8628       26.5853          134       139     2012      06        27        179              0.241333      20.539215       4.430834       0.326206       0.148000       0.107200       0.071600   -9999.000000
56693     56693     guizhou        104.8628       26.5853          134       139     2012      06        28        180              0.258500      20.018372      12.099806       0.332249       0.161000   -9999.000000       0.060400       0.851000
56693     56693     guizhou        104.8628       26.5853          134       139     2012      06        29        181              0.255208      20.345123      19.193533       0.336428   -9999.000000       0.275200   -9999.000000   -9999.000000
56693     56693     guizhou        104.8628       26.5853          134       139     2012      06        30        182              0.255042      21.640900       0.766798       0.355523   -9999.000000   -9999.000000   -9999.000000   -9999.000000
56693     56693     guizhou        104.8628       26.5853          134       139     2012      07        01        183              0.244958      21.490540       2.998258       0.337445       0.127500       0.103000   -9999.000000       0.883000
56693     56693     guizhou        104.8628       26.5853          134       139     2012      07        02        184              0.237500      20.911041       0.000000       0.332047       0.121000       0.246800       0.097000       0.655000
56693     56693     guizhou        104.8628       26.5853          134       139     2012      07        03        185              0.227083      21.889984       0.406616       0.322026       0.117000   -9999.000000       0.098300       0.696000
56693     56693     guizhou        104.8628       26.5853          134       139     2012      07        04        186              0.244875      21.927277      12.676888       0.318206   -9999.000000       0.110200       0.093100   -9999.000000
56693     56693     guizhou        104.8628       26.5853          134       139     2012      07        05        187              0.261870      20.677917      18.839382       0.332806   -9999.000000       0.188600   -9999.000000       0.948000
56693     56693     guizhou        104.8628       26.5853          134       139     2012      07        06        188              0.252125      20.289886       0.741023       0.355224   -9999.000000   -9999.000000   -9999.000000   -9999.000000
56693     56693     guizhou        104.8628       26.5853          134       139     2012      07        07        189              0.237958      22.586853       3.547997       0.330114   -9999.000000       0.197400       0.102500       0.687000
56693     56693     guizhou        104.8628       26.5853          134       139     2012      07        08        190              0.227333      22.955444       1.744164       0.327660       0.112500   -9999.000000       0.091400       0.766000
56693     56693     guizhou        104.8628       26.5853          134       139     2012      07        09        191              0.215125      23.275513       0.000000       0.324717       0.107000   -9999.000000       0.099800   -9999.000000
56693     56693     guizhou        104.8628       26.5853          134       139     2012      07        10        192              0.203083      23.580750       5.700214       0.319785   -9999.000000       0.053100   -9999.000000       1.000000
56693     56693     guizhou        104.8628       26.5853          134       139     2012      07        11        193              0.201667      23.604797       8.957788       0.326189   -9999.000000   -9999.000000   -9999.000000   -9999.000000
56693     56693     guizhou        104.8628       26.5853          134       139     2012      07        12        194              0.236458      23.343872      29.230724       0.337008       0.206000       0.063100   -9999.000000       0.924000
56693     56693     guizhou        104.8628       26.5853          134       139     2012      07        13        195              0.264625      20.964661      10.320806       0.355215       0.187000   -9999.000000       0.099200       1.000000
56693     56693     guizhou        104.8628       26.5853          134       139     2012      07        14        196              0.245417      19.815521       0.408094       0.354360       0.175000       0.213800       0.108900   -9999.000000
56693     56693     guizhou        104.8628       26.5853          134       139     2012      07        15        197              0.235417      22.617493       6.221358       0.334015   -9999.000000       0.141200       0.095400       0.957000
56693     56693     guizhou        104.8628       26.5853          134       139     2012      07        16        198              0.267167      21.210266      43.641426       0.339523   -9999.000000   -9999.000000   -9999.000000   -9999.000000
56693     56693     guizhou        104.8628       26.5853          134       139     2012      07        17        199              0.265458      20.373383       3.297539       0.371977       0.230000       0.200300   -9999.000000       0.876000
56693     56693     guizhou        104.8628       26.5853          134       139     2012      07        18        200              0.270458      19.473053      18.287941       0.355752       0.220500   -9999.000000   -9999.000000   -9999.000000
56693     56693     guizhou        104.8628       26.5853          134       139     2012      07        19        201              0.266333      19.817688       7.224234       0.360015       0.199000       0.072400       0.138400       0.829000
56693     56693     guizhou        104.8628       26.5853          134       139     2012      07        20        202              0.250958      20.933899       0.863174       0.359254       0.174000       0.219300       0.134300       0.828000
56693     56693     guizhou        104.8628       26.5853          134       139     2012      07        21        203              0.255625      22.250366       1.217497       0.345700   -9999.000000   -9999.000000       0.117700   -9999.000000
56693     56693     guizhou        104.8628       26.5853          134       139     2012      07        22        204              0.277583      23.362732      33.388103       0.340610   -9999.000000       0.145100   -9999.000000       0.862000
56693     56693     guizhou        104.8628       26.5853          134       139     2012      07        23        205              0.263870      19.111115       0.563846       0.368230       0.256000       0.135300   -9999.000000   -9999.000000
56693     56693     guizhou        104.8628       26.5853          134       139     2012      07        24        206              0.262083      19.485931      13.324450       0.350874       0.266500   -9999.000000       0.157400       0.565000
56693     56693     guizhou        104.8628       26.5853          134       139     2012      07        25        207              0.282833      19.138672      25.165237       0.352215       0.267000       0.180600       0.144800       1.000000
56693     56693     guizhou        104.8628       26.5853          134       139     2012      07        26        208              0.272958      19.417877       2.465962       0.368517   -9999.000000   -9999.000000       0.137600   -9999.000000
56693     56693     guizhou        104.8628       26.5853          134       139     2012      07        27        209              0.262043      20.174652       1.685900       0.357186   -9999.000000   -9999.000000   -9999.000000       0.644000
56693     56693     guizhou        104.8628       26.5853          134       139     2012      07        28        210              0.271833      21.332672      11.025182       0.347811       0.239000       0.266600   -9999.000000   -9999.000000
56693     56693     guizhou        104.8628       26.5853          134       139     2012      07        29        211              0.262042      20.125580       0.431401       0.353913       0.230000   -9999.000000   -9999.000000       0.522000
56693     56693     guizhou        104.8628       26.5853          134       139     2012      07        30        212              0.252783      21.828583       0.116880       0.343480       0.214000       0.106700       0.121000       0.785000
56693     56693     guizhou        104.8628       26.5853          134       139     2012      07        31        213              0.283625      22.902679      20.533440       0.337875   -9999.000000   -9999.000000       0.134600       0.928000
56693     56693     guizhou        104.8628       26.5853          134       139     2012      08        01        214              0.269417      21.536804       2.080938       0.352481   -9999.000000   -9999.000000       0.114200       0.874000
56693     56693     guizhou        104.8628       26.5853          134       139     2012      08        02        215              0.256875      20.486877       1.583437       0.345475       0.252000       0.089700   -9999.000000   -9999.000000
56693     56693     guizhou        104.8628       26.5853          134       139     2012      08        03        216              0.248333      20.767242       0.826444       0.339995       0.247500   -9999.000000   -9999.000000       0.629000
56693     56693     guizhou        104.8628       26.5853          134       139     2012      08        04        217              0.238333      21.928711       2.941643       0.335259       0.226500       0.077700   -9999.000000   -9999.000000
56693     56693     guizhou        104.8628       26.5853          134       139     2012      08        05        218              0.232708      23.227570       3.400909       0.329901       0.213000   -9999.000000       0.136100       0.502000
56693     56693     guizhou        104.8628       26.5853          134       139     2012      08        06        219              0.276542      23.429749      14.019375       0.330627   -9999.000000       0.028500       0.177700       0.643000
56693     56693     guizhou        104.8628       26.5853          134       139     2012      08        07        220              0.278250      20.699890       4.245091       0.347577   -9999.000000       0.049500       0.149100   -9999.000000
56693     56693     guizhou        104.8628       26.5853          134       139     2012      08        08        221              0.261500      20.216034       0.895181       0.344430       0.247500   -9999.000000   -9999.000000       0.653000
56693     56693     guizhou        104.8628       26.5853          134       139     2012      08        09        222              0.249958      22.440338       1.063521       0.332309       0.233500   -9999.000000   -9999.000000   -9999.000000
56693     56693     guizhou        104.8628       26.5853          134       139     2012      08        10        223              0.237250      22.210388       0.000000       0.329369       0.228000       0.141400       0.145700       0.446000
56693     56693     guizhou        104.8628       26.5853          134       139     2012      08        11        224              0.221958      22.680939       0.000000       0.325305   -9999.000000   -9999.000000       0.157000       0.636000
56693     56693     guizhou        104.8628       26.5853          134       139     2012      08        12        225              0.205083      23.635437       0.253682       0.322695   -9999.000000       0.058400       0.136500   -9999.000000
56693     56693     guizhou        104.8628       26.5853          134       139     2012      08        13        226              0.201917      23.730316       1.168289       0.321680       0.169500   -9999.000000   -9999.000000       0.441000
56693     56693     guizhou        104.8628       26.5853          134       139     2012      08        14        227              0.230333      23.792084      23.621264       0.321225   -9999.000000   -9999.000000   -9999.000000   -9999.000000
56693     56693     guizhou        104.8628       26.5853          134       139     2012      08        15        228              0.259750      23.373627       2.762971       0.342919       0.177000       0.023400   -9999.000000       0.597000
56693     56693     guizhou        104.8628       26.5853          134       139     2012      08        16        229              0.244583      22.461121       0.287181       0.343114       0.146000   -9999.000000       0.108400   -9999.000000
56693     56693     guizhou        104.8628       26.5853          134       139     2012      08        17        230              0.228667      23.256378       1.729251       0.328387   -9999.000000       0.054300       0.118000       0.474000
56693     56693     guizhou        104.8628       26.5853          134       139     2012      08        18        231              0.258958      23.639313      12.745650       0.324048       0.193000   -9999.000000       0.116400       0.806000
56693     56693     guizhou        104.8628       26.5853          134       139     2012      08        19        232              0.262958      20.357086       1.079226       0.344640       0.173000       0.056000   -9999.000000   -9999.000000
56693     56693     guizhou        104.8628       26.5853          134       139     2012      08        20        233              0.250083      21.382294       9.899980       0.332695       0.167500   -9999.000000   -9999.000000       0.719000
56693     56693     guizhou        104.8628       26.5853          134       139     2012      08        21        234              0.237917      22.427643       0.000000       0.336662       0.187000   -9999.000000       0.104200   -9999.000000
56693     56693     guizhou        104.8628       26.5853          134       139     2012      08        22        235              0.224250      20.676270       0.000000       0.329467   -9999.000000       0.132200       0.100300   -9999.000000
56693     56693     guizhou        104.8628       26.5853          134       139     2012      08        23        236              0.215250      18.805237       0.000000       0.325841   -9999.000000   -9999.000000       0.101700       0.502000
56693     56693     guizhou        104.8628       26.5853          134       139     2012      08        24        237              0.206000      18.687561       0.920312       0.324596       0.223000   -9999.000000       0.090800   -9999.000000
56693     56693     guizhou        104.8628       26.5853          134       139     2012      08        25        238              0.000000      20.015717       2.967578       0.323209       0.205500       0.090700   -9999.000000       0.389000
56693     56693     guizhou        104.8628       26.5853          134       139     2012      08        26        239              0.189208      20.463287       0.434596       0.324052       0.201000   -9999.000000   -9999.000000   -9999.000000
56693     56693     guizhou        104.8628       26.5853          134       139     2012      08        27        240              0.181348      20.627716       4.513258       0.322599   -9999.000000   -9999.000000       0.076600       0.424000
56693     56693     guizhou        104.8628       26.5853          134       139     2012      08        28        241              0.198417      21.897369      46.747566       0.320350   -9999.000000       0.085000       0.085400       0.505000
56693     56693     guizhou        104.8628       26.5853          134       139     2012      08        29        242              0.260917      21.513794       3.443113       0.346208       0.209000   -9999.000000       0.071600       0.682000
56693     56693     guizhou        104.8628       26.5853          134       139     2012      08        30        243              0.245333      21.683167       6.278481       0.350131       0.207000       0.063800   -9999.000000       0.695000
56693     56693     guizhou        104.8628       26.5853          134       139     2012      08        31        244              0.237167      22.340576       5.222285       0.340966       0.210500   -9999.000000   -9999.000000   -9999.000000
56693     56693     guizhou        104.8628       26.5853          134       139     2012      09        01        245              0.248500      22.011200      32.450260       0.340878       0.183000   -9999.000000   -9999.000000       0.572000
56693     56693     guizhou        104.8628       26.5853          134       139     2012      09        02        246              0.260417      20.676575       0.218005       0.354486   -9999.000000       0.092500       0.079600   -9999.000000
56693     56693     guizhou        104.8628       26.5853          134       139     2012      09        03        247              0.244833      18.324677       0.000000       0.349513   -9999.000000   -9999.000000       0.101500       0.412000
56693     56693     guizhou        104.8628       26.5853          134       139     2012      09        04        248              0.234042      19.569641       2.601517       0.338962       0.196500       0.075600       0.089500       0.536000
56693     56693     guizhou        104.8628       26.5853          134       139     2012      09        05        249              0.220667      19.355530       0.000000       0.335579       0.190000   -9999.000000   -9999.000000   -9999.000000
56693     56693     guizhou        104.8628       26.5853          134       139     2012      09        06        250              0.203292      20.192963       0.000000       0.331476       0.181000   -9999.000000   -9999.000000       0.497000
56693     56693     guizhou        104.8628       26.5853          134       139     2012      09        07        251              0.202083      21.619720       0.000000       0.327525   -9999.000000   -9999.000000       0.100500   -9999.000000
56693     56693     guizhou        104.8628       26.5853          134       139     2012      09        08        252              0.197125      21.097198      21.051683       0.326661   -9999.000000   -9999.000000       0.100000       0.450000
56693     56693     guizhou        104.8628       26.5853          134       139     2012      09        09        253              0.191500      22.423645       0.088661       0.341206       0.201000       0.144900       0.102800       0.730000
56693     56693     guizhou        104.8628       26.5853          134       139     2012      09        10        254              0.186417      21.989594       1.785410       0.339961       0.193500   -9999.000000   -9999.000000   -9999.000000
56693     56693     guizhou        104.8628       26.5853          134       139     2012      09        11        255              0.271083      21.648865      38.020226       0.333332       0.146000   -9999.000000   -9999.000000       0.975000
56693     56693     guizhou        104.8628       26.5853          134       139     2012      09        12        256              0.289375      19.001343       6.285040       0.366091       0.159000       0.199300   -9999.000000   -9999.000000
56693     56693     guizhou        104.8628       26.5853          134       139     2012      09        13        257              0.291083      15.906921       2.972926       0.350207   -9999.000000   -9999.000000       0.061300       0.544000
56693     56693     guizhou        104.8628       26.5853          134       139     2012      09        14        258              0.273583      15.149414       0.000000       0.348583       0.137000       0.117600       0.063700   -9999.000000
56693     56693     guizhou        104.8628       26.5853          134       139     2012      09        15        259              0.265000      15.942169       1.330224       0.340954       0.145500       0.043600       0.055000       0.557000
56693     56693     guizhou        104.8628       26.5853          134       139     2012      09        16        260              0.276174      16.238495       6.047816       0.339019       0.153500   -9999.000000   -9999.000000       0.617000
56693     56693     guizhou        104.8628       26.5853          134       139     2012      09        17        261              0.288000      15.161713       1.815500       0.345109       0.172500       0.047300   -9999.000000   -9999.000000
56693     56693     guizhou        104.8628       26.5853          134       139     2012      09        18        262              0.293833      14.969696       3.469273       0.339772   -9999.000000   -9999.000000   -9999.000000       0.709000
56693     56693     guizhou        104.8628       26.5853          134       139     2012      09        19        263              0.288083      14.344727       2.170073       0.341010   -9999.000000       0.152200       0.047300   -9999.000000
56693     56693     guizhou        104.8628       26.5853          134       139     2012      09        20        264              0.292083      15.246674       2.452849       0.338797       0.172500   -9999.000000       0.054900       0.542000
56693     56693     guizhou        104.8628       26.5853          134       139     2012      09        21        265              0.286750      15.810211       0.880147       0.339257   -9999.000000   -9999.000000       0.047300       0.744000
56693     56693     guizhou        104.8628       26.5853          134       139     2012      09        22        266              0.281958      15.420258       0.156657       0.335853       0.150500       0.184800   -9999.000000   -9999.000000
56693     56693     guizhou        104.8628       26.5853          134       139     2012      09        23        267              0.280583      16.315674       1.303712       0.333653   -9999.000000   -9999.000000   -9999.000000       0.555000
56693     56693     guizhou        104.8628       26.5853          134       139     2012      09        24        268              0.283375      15.682404       1.526896       0.334504   -9999.000000       0.048100       0.040700   -9999.000000
56693     56693     guizhou        104.8628       26.5853          134       139     2012      09        25        269              0.294458      15.928253      12.997848       0.334917       0.170000   -9999.000000       0.042700       0.681000
56693     56693     guizhou        104.8628       26.5853          134       139     2012      09        26        270              0.302000      17.761322       6.663776       0.344185       0.156500   -9999.000000       0.038000       0.973000
56693     56693     guizhou        104.8628       26.5853          134       139     2012      09        27        271              0.290714      16.849213       0.453190       0.347750       0.166000       0.140500   -9999.000000       0.593000
56693     56693     guizhou        104.8628       26.5853          134       139     2012      09        28        272              0.285467      16.094574       0.479186       0.336706       0.167000   -9999.000000   -9999.000000       0.776000
56693     56693     guizhou        104.8628       26.5853          134       139     2012      09        29        273              0.280000      15.344940       0.312663       0.335321   -9999.000000   -9999.000000   -9999.000000   -9999.000000
56693     56693     guizhou        104.8628       26.5853          134       139     2012      09        30        274              0.298583      16.297852       9.128278       0.332227   -9999.000000   -9999.000000       0.034400       0.840000
56693     56693     guizhou        104.8628       26.5853          134       139     2012      10        01        275              0.287917      14.739349       0.394842       0.345579       0.119500   -9999.000000       0.035700   -9999.000000
56693     56693     guizhou        104.8628       26.5853          134       139     2012      10        02        276              0.288292      15.821625      19.784136       0.334870       0.119000       0.083400       0.027000       0.627000
56693     56693     guizhou        104.8628       26.5853          134       139     2012      10        03        277              0.300375      16.085358       4.512435       0.345575       0.126500       0.087600   -9999.000000       0.737000
56693     56693     guizhou        104.8628       26.5853          134       139     2012      10        04        278              0.303833      14.558685       7.012280       0.350283   -9999.000000   -9999.000000   -9999.000000   -9999.000000
56693     56693     guizhou        104.8628       26.5853          134       139     2012      10        05        279              0.299292      13.981873       0.864708       0.348523   -9999.000000   -9999.000000   -9999.000000       0.762000
56693     56693     guizhou        104.8628       26.5853          134       139     2012      10        06        280              0.294167      13.489929       0.259928       0.342156       0.125000   -9999.000000       0.034400   -9999.000000
56693     56693     guizhou        104.8628       26.5853          134       139     2012      10        07        281              0.288000      13.606873       0.169534       0.338986       0.128000   -9999.000000       0.037900       0.754000
56693     56693     guizhou        104.8628       26.5853          134       139     2012      10        08        282              0.295583      14.897369       7.963337       0.336858       0.121500       0.227400       0.040600       0.728000
56693     56693     guizhou        104.8628       26.5853          134       139     2012      10        09        283              0.302792      15.513763       2.015735       0.341554       0.126000   -9999.000000   -9999.000000   -9999.000000
56693     56693     guizhou        104.8628       26.5853          134       139     2012      10        10        284              0.289750      13.216156       0.474742       0.342534   -9999.000000       0.064600   -9999.000000       0.762000
56693     56693     guizhou        104.8628       26.5853          134       139     2012      10        11        285              0.286583      13.017303       1.865072       0.336374       0.192000   -9999.000000       0.039700   -9999.000000
56693     56693     guizhou        104.8628       26.5853          134       139     2012      10        12        286              0.294417      14.654144       6.846386       0.336720       0.198500       0.049900       0.049400       0.669000
56693     56693     guizhou        104.8628       26.5853          134       139     2012      10        13        287              0.297792      15.261597       1.050107       0.341142       0.174000   -9999.000000       0.039000   -9999.000000
56693     56693     guizhou        104.8628       26.5853          134       139     2012      10        14        288              0.287542      14.226013       0.394843       0.338977       0.150000   -9999.000000   -9999.000000       0.693000
56693     56693     guizhou        104.8628       26.5853          134       139     2012      10        15        289              0.280542      16.814301       0.356135       0.333276   -9999.000000       0.152000   -9999.000000       0.743000
56693     56693     guizhou        104.8628       26.5853          134       139     2012      10        16        290              0.272667      18.658905       0.000000       0.329707   -9999.000000   -9999.000000   -9999.000000   -9999.000000
56693     56693     guizhou        104.8628       26.5853          134       139     2012      10        17        291              0.265000      16.236542       0.000000       0.328154       0.176500   -9999.000000       0.061100       0.361000
56693     56693     guizhou        104.8628       26.5853          134       139     2012      10        18        292              0.257708      13.424805       0.000000       0.328411       0.158000       0.169800       0.058900   -9999.000000
56693     56693     guizhou        104.8628       26.5853          134       139     2012      10        19        293              0.249917      16.314789       0.000000       0.326000       0.146000   -9999.000000       0.055100       0.373000
56693     56693     guizhou        104.8628       26.5853          134       139     2012      10        20        294              0.239625      17.535431       0.000000       0.324816       0.145000       0.089600   -9999.000000       0.588000
56693     56693     guizhou        104.8628       26.5853          134       139     2012      10        21        295              0.227333      17.776001       0.000000       0.322947   -9999.000000   -9999.000000   -9999.000000   -9999.000000
56693     56693     guizhou        104.8628       26.5853          134       139     2012      10        22        296              0.218042      18.000793       0.000000       0.321219   -9999.000000   -9999.000000       0.075100       0.298000
56693     56693     guizhou        104.8628       26.5853          134       139     2012      10        23        297              0.211625      15.657227       0.000000       0.322314   -9999.000000       0.160800       0.070200   -9999.000000
56693     56693     guizhou        104.8628       26.5853          134       139     2012      10        24        298              0.204750      16.680206       2.899243       0.319828   -9999.000000   -9999.000000       0.069000       0.283000
56693     56693     guizhou        104.8628       26.5853          134       139     2012      10        25        299              0.000000      14.712769       0.000000       0.319663       0.124000       0.034600       0.061000       0.452000
56693     56693     guizhou        104.8628       26.5853          134       139     2012      10        26        300              0.193250      17.023621       0.000000       0.317121   -9999.000000       0.272500   -9999.000000       0.342000
56693     56693     guizhou        104.8628       26.5853          134       139     2012      10        27        301              0.189583      17.276520       0.000000       0.315650   -9999.000000   -9999.000000   -9999.000000       0.315000
56693     56693     guizhou        104.8628       26.5853          134       139     2012      10        28        302              0.000000      16.294403       6.558401       0.315583       0.140000       0.053600       0.065100   -9999.000000
56693     56693     guizhou        104.8628       26.5853          134       139     2012      10        29        303              0.180167      17.320801       0.468725       0.314209       0.144000   -9999.000000       0.077000       0.331000
56693     56693     guizhou        104.8628       26.5853          134       139     2012      10        30        304              0.175875      16.271027       0.769051       0.313358       0.138500   -9999.000000       0.069200   -9999.000000
56693     56693     guizhou        104.8628       26.5853          134       139     2012      10        31        305              0.172708      11.005768       0.000000       0.314375   -9999.000000   -9999.000000   -9999.000000       0.218000
56693     56693     guizhou        104.8628       26.5853          134       139     2012      11        01        306              0.169333      13.102814       0.000000       0.310118   -9999.000000   -9999.000000   -9999.000000       0.339000
56693     56693     guizhou        104.8628       26.5853          134       139     2012      11        02        307              0.167000      13.893799       0.000000       0.309400       0.168000   -9999.000000   -9999.000000   -9999.000000
56693     56693     guizhou        104.8628       26.5853          134       139     2012      11        03        308              0.164833      13.912018       0.179452       0.308739       0.184500   -9999.000000       0.075300       0.331000
56693     56693     guizhou        104.8628       26.5853          134       139     2012      11        04        309              0.164458      13.536072       0.944826       0.308570       0.177500   -9999.000000       0.075900   -9999.000000
56693     56693     guizhou        104.8628       26.5853          134       139     2012      11        05        310              0.165000      12.058044       1.378346       0.311918       0.160000   -9999.000000       0.105200       0.224000
56693     56693     guizhou        104.8628       26.5853          134       139     2012      11        06        311              0.166500      12.532410       0.543688       0.313462   -9999.000000   -9999.000000   -9999.000000       0.512000
56693     56693     guizhou        104.8628       26.5853          134       139     2012      11        07        312              0.168542      10.733215       0.174578       0.314459       0.231000       0.040400   -9999.000000   -9999.000000
56693     56693     guizhou        104.8628       26.5853          134       139     2012      11        08        313              0.169792      10.536041       0.210479       0.313519       0.175500   -9999.000000       0.108000       0.383000
56693     56693     guizhou        104.8628       26.5853          134       139     2012      11        09        314              0.170500      10.504852       0.000000       0.312964       0.164000   -9999.000000       0.100400   -9999.000000
56693     56693     guizhou        104.8628       26.5853          134       139     2012      11        10        315              0.168667      14.077118       0.085633       0.308655       0.176500   -9999.000000       0.118400       0.190000
56693     56693     guizhou        104.8628       26.5853          134       139     2012      11        11        316              0.167917      13.552856       0.203633       0.307437   -9999.000000   -9999.000000   -9999.000000   -9999.000000
56693     56693     guizhou        104.8628       26.5853          134       139     2012      11        12        317              0.167250       9.829498       0.000000       0.309346   -9999.000000       0.029900   -9999.000000       0.119000
56693     56693     guizhou        104.8628       26.5853          134       139     2012      11        13        318              0.000000      13.414398       0.000000       0.307394       0.143500       0.169300   -9999.000000       0.391000
56693     56693     guizhou        104.8628       26.5853          134       139     2012      11        14        319              0.163875      14.375153       0.000000       0.305500       0.136500   -9999.000000       0.100800   -9999.000000
56693     56693     guizhou        104.8628       26.5853          134       139     2012      11        15        320              0.162333      15.506378       0.000000       0.303990       0.126500       0.085300       0.109400       0.230000
56693     56693     guizhou        104.8628       26.5853          134       139     2012      11        16        321              0.159958      15.783081       0.717440       0.302435       0.141000   -9999.000000       0.099900   -9999.000000
56693     56693     guizhou        104.8628       26.5853          134       139     2012      11        17        322              0.000000       9.838745       0.000000       0.304282   -9999.000000   -9999.000000   -9999.000000       0.170000
56693     56693     guizhou        104.8628       26.5853          134       139     2012      11        18        323              0.156833      11.396912       0.000000       0.302401       0.156000       0.045700   -9999.000000       0.276000
56693     56693     guizhou        104.8628       26.5853          134       139     2012      11        19        324              0.156417      13.166168       0.258047       0.302733       0.145000   -9999.000000   -9999.000000   -9999.000000
56693     56693     guizhou        104.8628       26.5853          134       139     2012      11        20        325              0.156500      11.305267       0.000000       0.304638       0.137500       0.105100       0.105300       0.101000
56693     56693     guizhou        104.8628       26.5853          134       139     2012      11        21        326              0.155667      15.187164       1.569767       0.303147       0.159000   -9999.000000       0.117500   -9999.000000
56693     56693     guizhou        104.8628       26.5853          134       139     2012      11        22        327              0.155000      14.757141       0.000000       0.302631   -9999.000000   -9999.000000       0.102800       0.155000
56693     56693     guizhou        104.8628       26.5853          134       139     2012      11        23        328              0.155000      11.345001       0.508550       0.303388   -9999.000000       0.272100   -9999.000000       0.189000
56693     56693     guizhou        104.8628       26.5853          134       139     2012      11        24        329              0.155792       7.986633       0.000000       0.306672       0.190000   -9999.000000   -9999.000000       0.196000
56693     56693     guizhou        104.8628       26.5853          134       139     2012      11        25        330              0.155625      13.152863       0.000000       0.304642       0.182000       0.036200       0.105500       0.241000
56693     56693     guizhou        104.8628       26.5853          134       139     2012      11        26        331              0.154000      10.672028       0.038310       0.302490       0.181500   -9999.000000   -9999.000000   -9999.000000
56693     56693     guizhou        104.8628       26.5853          134       139     2012      11        27        332              0.154000       6.574341       1.306880       0.304237   -9999.000000   -9999.000000       0.101100       0.153000
56693     56693     guizhou        104.8628       26.5853          134       139     2012      11        28        333              0.154583       8.953552       4.681810       0.304952   -9999.000000       0.107300   -9999.000000   -9999.000000
56693     56693     guizhou        104.8628       26.5853          134       139     2012      11        29        334              0.155000       8.616913       1.272768       0.305341       0.187000   -9999.000000   -9999.000000       0.079000
56693     56693     guizhou        104.8628       26.5853          134       139     2012      11        30        335              0.155000      11.366058       0.000000       0.303755       0.184500   -9999.000000   -9999.000000       0.236000
56693     56693     guizhou        104.8628       26.5853          134       139     2012      12        01        336              0.154208      11.701263       0.000000       0.302894       0.166500       0.038100       0.118600   -9999.000000
56693     56693     guizhou        104.8628       26.5853          134       139     2012      12        02        337              0.153667       5.829102       0.195631       0.304906       0.153000   -9999.000000       0.128700       0.052000
56693     56693     guizhou        104.8628       26.5853          134       139     2012      12        03        338              0.153000       8.722076       1.476530       0.305513   -9999.000000   -9999.000000       0.089900   -9999.000000
56693     56693     guizhou        104.8628       26.5853          134       139     2012      12        04        339              0.153792       6.099609       0.264130       0.307281       0.192000   -9999.000000   -9999.000000       0.026000
56693     56693     guizhou        104.8628       26.5853          134       139     2012      12        05        340              0.153667       6.446289       0.000000       0.308013       0.186500   -9999.000000   -9999.000000       0.026000
56693     56693     guizhou        104.8628       26.5853          134       139     2012      12        06        341              0.153542       5.822754       0.000000       0.307387       0.164000   -9999.000000       0.103900   -9999.000000
56693     56693     guizhou        104.8628       26.5853          134       139     2012      12        07        342              0.154167       9.718903       0.636557       0.306071       0.171500   -9999.000000       0.097600       0.092000
56693     56693     guizhou        104.8628       26.5853          134       139     2012      12        08        343              0.154786       7.496948       0.573169       0.308932   -9999.000000   -9999.000000       0.104800   -9999.000000
56693     56693     guizhou        104.8628       26.5853          134       139     2012      12        09        344              0.156792       6.722015       3.604530       0.311254   -9999.000000   -9999.000000       0.094500       0.281000
56693     56693     guizhou        104.8628       26.5853          134       139     2012      12        10        345              0.158792       6.376251       0.342722       0.311827       0.197000   -9999.000000   -9999.000000   -9999.000000
56693     56693     guizhou        104.8628       26.5853          134       139     2012      12        11        346              0.160478       5.294098       0.451649       0.310987       0.156000       0.036500   -9999.000000       0.160000
56693     56693     guizhou        104.8628       26.5853          134       139     2012      12        12        347              0.161667       5.848907       0.112849       0.310786       0.143500   -9999.000000       0.110200       0.245000
56693     56693     guizhou        104.8628       26.5853          134       139     2012      12        13        348              0.162833       8.391113       0.000000       0.309149       0.131000   -9999.000000       0.120900   -9999.000000
56693     56693     guizhou        104.8628       26.5853          134       139     2012      12        14        349              0.162875      10.786682       0.076015       0.306111   -9999.000000   -9999.000000       0.107000       0.126000
56693     56693     guizhou        104.8628       26.5853          134       139     2012      12        15        350              0.000000      11.158905       0.000000       0.303781       0.144000   -9999.000000   -9999.000000   -9999.000000
56693     56693     guizhou        104.8628       26.5853          134       139     2012      12        16        351              0.161000      11.182129       0.000000       0.302448       0.141500       0.025100   -9999.000000       0.152000
56693     56693     guizhou        104.8628       26.5853          134       139     2012      12        17        352              0.160125      11.448975       0.000000       0.301578       0.154000   -9999.000000   -9999.000000       0.064000
56693     56693     guizhou        104.8628       26.5853          134       139     2012      12        18        353              0.159500       6.813995       0.095910       0.303325       0.143000   -9999.000000       0.087800   -9999.000000
56693     56693     guizhou        104.8628       26.5853          134       139     2012      12        19        354              0.159000       7.345520       0.000000       0.303684   -9999.000000       0.035800       0.086300       0.195000
56693     56693     guizhou        104.8628       26.5853          134       139     2012      12        20        355              0.000000      10.391907       0.094616       0.302295   -9999.000000   -9999.000000       0.078600   -9999.000000
56693     56693     guizhou        104.8628       26.5853          134       139     2012      12        21        356              0.157083       9.155304       0.333337       0.301342       0.147000       0.070000   -9999.000000       0.130000
56693     56693     guizhou        104.8628       26.5853          134       139     2012      12        22        357              0.157708       4.129272       0.156075       0.304018       0.155000   -9999.000000   -9999.000000       0.053000
56693     56693     guizhou        104.8628       26.5853          134       139     2012      12        23        358              0.158000       2.224670       1.075053       0.290874   -9999.000000   -9999.000000       0.087800       0.007000
56693     56693     guizhou        104.8628       26.5853          134       139     2012      12        24        359              0.158000       2.159454       0.601203       0.290602   -9999.000000       0.028700       0.098200       0.225000
56693     56693     guizhou        104.8628       26.5853          134       139     2012      12        25        360              0.158667       7.055420       0.143876       0.305359   -9999.000000   -9999.000000       0.109600   -9999.000000
56693     56693     guizhou        104.8628       26.5853          134       139     2012      12        26        361              0.000000       5.682709       0.097777       0.306114       0.169000   -9999.000000   -9999.000000       0.075000
56693     56693     guizhou        104.8628       26.5853          134       139     2012      12        27        362              0.160667       3.822357       1.625576       0.306695       0.153000   -9999.000000   -9999.000000   -9999.000000
56693     56693     guizhou        104.8628       26.5853          134       139     2012      12        28        363              0.000000       7.552063       0.068217       0.304495       0.143500       0.026600   -9999.000000       0.091000
56693     56693     guizhou        104.8628       26.5853          134       139     2012      12        29        364              0.000000       8.824799       0.087840       0.301604   -9999.000000   -9999.000000       0.097900   -9999.000000
56693     56693     guizhou        104.8628       26.5853          134       139     2012      12        30        365              0.000000       0.196625       0.000000       0.237454   -9999.000000   -9999.000000       0.104800   -9999.000000
56693     56693     guizhou        104.8628       26.5853          134       139     2012      12        31        366              0.159267      -1.278412       0.753345       0.175368       0.156000   -9999.000000       0.082000   -9999.000000
