# Supplementary material for: Research on Fusing Multisatellite Soil Moisture Data Based on Bayesian Model Averaging
Source: Hindawi journal article supplement (doi:10.1155/2018/9310838), 2018-06-25
Supplement: f1 [file 9310838.f1.zip › 2012_sm00-10cm_daily_ZDB_ZHY_56751_366days_allin.txt]

56751     56751     yunnan         100.1100       25.4200          138       120     2012      01        01        001              0.000000   -9999.000000       0.000000   -9999.000000   -9999.000000   -9999.000000   -9999.000000   -9999.000000
56751     56751     yunnan         100.1100       25.4200          138       120     2012      01        02        002              0.000000      10.907013       0.668695       0.267911   -9999.000000   -9999.000000       0.145100       0.133000
56751     56751     yunnan         100.1100       25.4200          138       120     2012      01        03        003              0.000000      11.642975       3.238253       0.269552       0.315000   -9999.000000       0.148200       0.186000
56751     56751     yunnan         100.1100       25.4200          138       120     2012      01        04        004              0.000000      11.263275       4.448212       0.278306       0.328000   -9999.000000       0.134900   -9999.000000
56751     56751     yunnan         100.1100       25.4200          138       120     2012      01        05        005              0.000000       9.734680       0.627600       0.294554       0.341000   -9999.000000   -9999.000000       0.057000
56751     56751     yunnan         100.1100       25.4200          138       120     2012      01        06        006              0.000000       8.907837       0.000000       0.292708   -9999.000000   -9999.000000   -9999.000000   -9999.000000
56751     56751     yunnan         100.1100       25.4200          138       120     2012      01        07        007              0.000000       9.017120       0.000000       0.286186   -9999.000000   -9999.000000   -9999.000000       0.017000
56751     56751     yunnan         100.1100       25.4200          138       120     2012      01        08        008              0.000000       8.585480       1.699215       0.283458       0.329000   -9999.000000       0.139000       0.057000
56751     56751     yunnan         100.1100       25.4200          138       120     2012      01        09        009              0.000000       8.842285       2.984887       0.281544       0.325000   -9999.000000       0.145400   -9999.000000
56751     56751     yunnan         100.1100       25.4200          138       120     2012      01        10        010              0.000000       9.689575       0.640713       0.285466       0.349500   -9999.000000   -9999.000000       0.110000
56751     56751     yunnan         100.1100       25.4200          138       120     2012      01        11        011              0.000000      10.298645       0.149941       0.292339   -9999.000000   -9999.000000   -9999.000000   -9999.000000
56751     56751     yunnan         100.1100       25.4200          138       120     2012      01        12        012              0.000000       9.801849       0.136871       0.287256   -9999.000000   -9999.000000   -9999.000000       0.120000
56751     56751     yunnan         100.1100       25.4200          138       120     2012      01        13        013              0.000000      10.100677       4.193334       0.283893   -9999.000000   -9999.000000       0.152700       0.121000
56751     56751     yunnan         100.1100       25.4200          138       120     2012      01        14        014              0.000000       8.675934       1.364111       0.294941       0.273000   -9999.000000       0.149600       0.051000
56751     56751     yunnan         100.1100       25.4200          138       120     2012      01        15        015              0.000000       8.611267       0.000000       0.297190       0.282000   -9999.000000       0.143600       0.230000
56751     56751     yunnan         100.1100       25.4200          138       120     2012      01        16        016              0.000000       8.677673       0.110540       0.289089       0.270000   -9999.000000   -9999.000000   -9999.000000
56751     56751     yunnan         100.1100       25.4200          138       120     2012      01        17        017              0.000000       8.602081       0.072649       0.285598   -9999.000000   -9999.000000   -9999.000000       0.041000
56751     56751     yunnan         100.1100       25.4200          138       120     2012      01        18        018              0.000000       7.899780       0.290139       0.284397   -9999.000000   -9999.000000   -9999.000000   -9999.000000
56751     56751     yunnan         100.1100       25.4200          138       120     2012      01        19        019              0.000000       8.235870       0.101128       0.283089       0.266000   -9999.000000       0.146500       0.011000
56751     56751     yunnan         100.1100       25.4200          138       120     2012      01        20        020              0.000000       8.906738       1.010277       0.281355       0.305000   -9999.000000       0.143400       0.038000
56751     56751     yunnan         100.1100       25.4200          138       120     2012      01        21        021              0.000000       9.397522       0.236303       0.279271       0.343000   -9999.000000       0.146100   -9999.000000
56751     56751     yunnan         100.1100       25.4200          138       120     2012      01        22        022              0.000000       9.184235       0.000000       0.278282   -9999.000000   -9999.000000   -9999.000000       0.006000
56751     56751     yunnan         100.1100       25.4200          138       120     2012      01        23        023              0.000000       9.212036       0.000000       0.276365   -9999.000000   -9999.000000   -9999.000000   -9999.000000
56751     56751     yunnan         100.1100       25.4200          138       120     2012      01        24        024              0.000000       9.370514      26.387512       0.274155       0.338000   -9999.000000   -9999.000000       0.051000
56751     56751     yunnan         100.1100       25.4200          138       120     2012      01        25        025              0.000000       9.339020       0.000000       0.271773       0.327000   -9999.000000       0.152400       0.037000
56751     56751     yunnan         100.1100       25.4200          138       120     2012      01        26        026              0.000000       9.279602       7.870312       0.270453       0.322000   -9999.000000       0.144300       0.032000
56751     56751     yunnan         100.1100       25.4200          138       120     2012      01        27        027              0.000000       9.963226       0.000000       0.269188   -9999.000000   -9999.000000       0.152000       0.022000
56751     56751     yunnan         100.1100       25.4200          138       120     2012      01        28        028              0.000000      10.521942       0.000000       0.267561   -9999.000000   -9999.000000   -9999.000000   -9999.000000
56751     56751     yunnan         100.1100       25.4200          138       120     2012      01        29        029              0.000000      10.348480       0.000000       0.266142       0.311000   -9999.000000   -9999.000000       0.160000
56751     56751     yunnan         100.1100       25.4200          138       120     2012      01        30        030              0.000000      10.498505       0.000000       0.264673       0.278000   -9999.000000       0.152500   -9999.000000
56751     56751     yunnan         100.1100       25.4200          138       120     2012      01        31        031              0.000000      10.870239       0.000000       0.263223       0.359000   -9999.000000       0.164600       0.056000
56751     56751     yunnan         100.1100       25.4200          138       120     2012      02        01        032              0.000000      11.144592       0.000000       0.261518       0.244000   -9999.000000   -9999.000000       0.062000
56751     56751     yunnan         100.1100       25.4200          138       120     2012      02        02        033              0.000000      11.175659       0.000000       0.259487   -9999.000000   -9999.000000   -9999.000000   -9999.000000
56751     56751     yunnan         100.1100       25.4200          138       120     2012      02        03        034              0.000000      10.846130       0.000000       0.258318   -9999.000000   -9999.000000   -9999.000000       0.089000
56751     56751     yunnan         100.1100       25.4200          138       120     2012      02        04        035              0.000000      11.169952       0.000000       0.257362       0.218000   -9999.000000   -9999.000000   -9999.000000
56751     56751     yunnan         100.1100       25.4200          138       120     2012      02        05        036              0.000000      11.543030       0.651860       0.256123       0.243000   -9999.000000       0.160200       0.015000
56751     56751     yunnan         100.1100       25.4200          138       120     2012      02        06        037              0.000000      12.023590       0.000000       0.254194       0.232000   -9999.000000       0.157200       0.099000
56751     56751     yunnan         100.1100       25.4200          138       120     2012      02        07        038              0.000000      12.135193       0.000000       0.252240   -9999.000000   -9999.000000       0.139100   -9999.000000
56751     56751     yunnan         100.1100       25.4200          138       120     2012      02        08        039              0.000000      12.472015       0.000000       0.250895   -9999.000000   -9999.000000   -9999.000000       0.080000
56751     56751     yunnan         100.1100       25.4200          138       120     2012      02        09        040              0.000000      13.292786       0.540283       0.248082   -9999.000000   -9999.000000   -9999.000000   -9999.000000
56751     56751     yunnan         100.1100       25.4200          138       120     2012      02        10        041              0.000000      13.361420       0.164964       0.245621       0.269000   -9999.000000   -9999.000000       0.148000
56751     56751     yunnan         100.1100       25.4200          138       120     2012      02        11        042              0.000000      12.682343       0.657527       0.244974       0.262000   -9999.000000       0.153400       0.109000
56751     56751     yunnan         100.1100       25.4200          138       120     2012      02        12        043              0.000000      11.655396       0.481855       0.245653   -9999.000000   -9999.000000       0.141200       0.080000
56751     56751     yunnan         100.1100       25.4200          138       120     2012      02        13        044              0.000000      11.057129       1.807101       0.246809   -9999.000000   -9999.000000       0.165300       0.110000
56751     56751     yunnan         100.1100       25.4200          138       120     2012      02        14        045              0.000000      12.076721       0.043682       0.244900   -9999.000000   -9999.000000   -9999.000000   -9999.000000
56751     56751     yunnan         100.1100       25.4200          138       120     2012      02        15        046              0.000000      12.667816       0.059916       0.242065       0.234500   -9999.000000   -9999.000000       0.159000
56751     56751     yunnan         100.1100       25.4200          138       120     2012      02        16        047              0.000000      13.418152      10.917610       0.239630       0.249500   -9999.000000       0.173100   -9999.000000
56751     56751     yunnan         100.1100       25.4200          138       120     2012      02        17        048              0.000000      14.238220       0.694125       0.236529   -9999.000000   -9999.000000       0.161500       0.161000
56751     56751     yunnan         100.1100       25.4200          138       120     2012      02        18        049              0.000000      14.549103       0.315453       0.234074   -9999.000000   -9999.000000   -9999.000000       0.148000
56751     56751     yunnan         100.1100       25.4200          138       120     2012      02        19        050              0.000000      14.346527       0.139288       0.231336   -9999.000000   -9999.000000   -9999.000000   -9999.000000
56751     56751     yunnan         100.1100       25.4200          138       120     2012      02        20        051              0.000000      13.710388       0.057895       0.229326       0.194000   -9999.000000   -9999.000000       0.129000
56751     56751     yunnan         100.1100       25.4200          138       120     2012      02        21        052              0.000000      13.797089       0.158513       0.227257       0.236500   -9999.000000   -9999.000000   -9999.000000
56751     56751     yunnan         100.1100       25.4200          138       120     2012      02        22        053              0.000000      12.927460       0.000000       0.226728       0.219000   -9999.000000       0.158500       0.142000
56751     56751     yunnan         100.1100       25.4200          138       120     2012      02        23        054              0.000000      14.064880       0.000000       0.225450   -9999.000000   -9999.000000       0.146300       0.028000
56751     56751     yunnan         100.1100       25.4200          138       120     2012      02        24        055              0.000000      14.006836       0.000000       0.224874       0.255000   -9999.000000       0.137400       0.056000
56751     56751     yunnan         100.1100       25.4200          138       120     2012      02        25        056              0.000000      15.219543       0.163400       0.222295       0.230000   -9999.000000   -9999.000000       0.089000
56751     56751     yunnan         100.1100       25.4200          138       120     2012      02        26        057              0.000000      15.306610       0.000000       0.217343       0.224000   -9999.000000   -9999.000000   -9999.000000
56751     56751     yunnan         100.1100       25.4200          138       120     2012      02        27        058              0.000000      14.740295       0.079054       0.211619       0.233500   -9999.000000   -9999.000000       0.130000
56751     56751     yunnan         100.1100       25.4200          138       120     2012      02        28        059              0.000000      14.563324       0.161391       0.207432   -9999.000000   -9999.000000       0.133900   -9999.000000
56751     56751     yunnan         100.1100       25.4200          138       120     2012      02        29        060              0.000000   -9999.000000      36.181595   -9999.000000   -9999.000000   -9999.000000   -9999.000000   -9999.000000
56751     56751     yunnan         100.1100       25.4200          138       120     2012      03        01        061              0.000000      14.141510       3.059324       0.205102       0.243000   -9999.000000   -9999.000000       0.560000
56751     56751     yunnan         100.1100       25.4200          138       120     2012      03        02        062              0.000000      11.228516      12.634993       0.227982   -9999.000000   -9999.000000   -9999.000000   -9999.000000
56751     56751     yunnan         100.1100       25.4200          138       120     2012      03        03        063              0.000000      10.511871       3.478968       0.274649       0.296000   -9999.000000   -9999.000000       0.364000
56751     56751     yunnan         100.1100       25.4200          138       120     2012      03        04        064              0.000000       9.811310       0.171128       0.292431   -9999.000000   -9999.000000       0.164600   -9999.000000
56751     56751     yunnan         100.1100       25.4200          138       120     2012      03        05        065              0.000000      10.445343       0.035394       0.278810   -9999.000000   -9999.000000       0.132200       0.316000
56751     56751     yunnan         100.1100       25.4200          138       120     2012      03        06        066              0.000000      11.884064       0.000000       0.268397       0.267500   -9999.000000       0.131400       0.123000
56751     56751     yunnan         100.1100       25.4200          138       120     2012      03        07        067              0.000000      10.474579       0.037162       0.265740       0.237500   -9999.000000   -9999.000000   -9999.000000
56751     56751     yunnan         100.1100       25.4200          138       120     2012      03        08        068              0.000000      10.118805       0.084810       0.265151       0.242500   -9999.000000   -9999.000000       0.285000
56751     56751     yunnan         100.1100       25.4200          138       120     2012      03        09        069              0.000000       9.984924       0.427029       0.264646   -9999.000000   -9999.000000   -9999.000000   -9999.000000
56751     56751     yunnan         100.1100       25.4200          138       120     2012      03        10        070              0.000000      12.309113       0.205291       0.260973   -9999.000000   -9999.000000       0.136800       0.122000
56751     56751     yunnan         100.1100       25.4200          138       120     2012      03        11        071              0.000000      14.168610       3.678332       0.254775   -9999.000000   -9999.000000       0.135800       0.162000
56751     56751     yunnan         100.1100       25.4200          138       120     2012      03        12        072              0.000000      15.517609       0.068932       0.247915       0.195000   -9999.000000       0.138700       0.136000
56751     56751     yunnan         100.1100       25.4200          138       120     2012      03        13        073              0.000000      15.657318       0.000000       0.240811       0.205000   -9999.000000   -9999.000000       0.138000
56751     56751     yunnan         100.1100       25.4200          138       120     2012      03        14        074              0.000000      16.647186       0.692203       0.234882       0.196000   -9999.000000   -9999.000000   -9999.000000
56751     56751     yunnan         100.1100       25.4200          138       120     2012      03        15        075              0.000000      15.076050       0.130181       0.233078   -9999.000000   -9999.000000       0.140100       0.072000
56751     56751     yunnan         100.1100       25.4200          138       120     2012      03        16        076              0.000000      15.800415       0.142924       0.228805   -9999.000000   -9999.000000       0.153300   -9999.000000
56751     56751     yunnan         100.1100       25.4200          138       120     2012      03        17        077              0.000000      15.184418       0.310423       0.225246       0.177000   -9999.000000       0.157700       0.080000
56751     56751     yunnan         100.1100       25.4200          138       120     2012      03        18        078              0.000000      15.598389       0.108234       0.220678       0.204500   -9999.000000   -9999.000000       0.085000
56751     56751     yunnan         100.1100       25.4200          138       120     2012      03        19        079              0.000000      16.404449       0.865885       0.215035       0.198000   -9999.000000   -9999.000000   -9999.000000
56751     56751     yunnan         100.1100       25.4200          138       120     2012      03        20        080              0.000000      17.527374       0.000000       0.209493   -9999.000000   -9999.000000   -9999.000000       0.078000
56751     56751     yunnan         100.1100       25.4200          138       120     2012      03        21        081              0.000000      18.398712       0.000000       0.203762   -9999.000000   -9999.000000       0.119600   -9999.000000
56751     56751     yunnan         100.1100       25.4200          138       120     2012      03        22        082              0.000000      18.342590       0.037695       0.200562       0.211000   -9999.000000       0.125100       0.046000
56751     56751     yunnan         100.1100       25.4200          138       120     2012      03        23        083              0.000000      16.310455       0.783177       0.202402       0.195000   -9999.000000       0.109500       0.148000
56751     56751     yunnan         100.1100       25.4200          138       120     2012      03        24        084              0.000000      16.014923       5.448542       0.203674       0.189000   -9999.000000   -9999.000000       0.106000
56751     56751     yunnan         100.1100       25.4200          138       120     2012      03        25        085              0.000000      17.684357       1.463117       0.199181   -9999.000000   -9999.000000   -9999.000000       0.185000
56751     56751     yunnan         100.1100       25.4200          138       120     2012      03        26        086              0.000000      17.211151       0.121289       0.196079   -9999.000000   -9999.000000   -9999.000000   -9999.000000
56751     56751     yunnan         100.1100       25.4200          138       120     2012      03        27        087              0.000000      18.340576       0.903964       0.193274       0.207000   -9999.000000       0.106100       0.112000
56751     56751     yunnan         100.1100       25.4200          138       120     2012      03        28        088              0.000000      18.472717       3.809940       0.195610       0.187000   -9999.000000       0.110700   -9999.000000
56751     56751     yunnan         100.1100       25.4200          138       120     2012      03        29        089              0.000000      18.500244       6.136306       0.194717       0.188000   -9999.000000       0.084600       0.057000
56751     56751     yunnan         100.1100       25.4200          138       120     2012      03        30        090              0.000000      18.830902      24.552729       0.187188       0.173000   -9999.000000   -9999.000000       0.214000
56751     56751     yunnan         100.1100       25.4200          138       120     2012      03        31        091              0.000000      19.397675       0.513349       0.180074   -9999.000000   -9999.000000   -9999.000000   -9999.000000
56751     56751     yunnan         100.1100       25.4200          138       120     2012      04        01        092              0.000000      18.893158       1.471673       0.176239       0.190000   -9999.000000       0.088800       0.041000
56751     56751     yunnan         100.1100       25.4200          138       120     2012      04        02        093              0.000000      19.572754       0.678672       0.171120       0.150500   -9999.000000       0.094900   -9999.000000
56751     56751     yunnan         100.1100       25.4200          138       120     2012      04        03        094              0.000000      20.899048       0.041933       0.164114       0.157000   -9999.000000       0.122200       0.144000
56751     56751     yunnan         100.1100       25.4200          138       120     2012      04        04        095              0.000000      21.152863       0.177917       0.157552       0.131000   -9999.000000   -9999.000000       0.077000
56751     56751     yunnan         100.1100       25.4200          138       120     2012      04        05        096              0.000000      20.469757       0.160995       0.155521   -9999.000000   -9999.000000   -9999.000000   -9999.000000
56751     56751     yunnan         100.1100       25.4200          138       120     2012      04        06        097              0.000000      20.430756       2.255422       0.153993   -9999.000000   -9999.000000   -9999.000000       0.232000
56751     56751     yunnan         100.1100       25.4200          138       120     2012      04        07        098              0.000000      18.526154       0.970730       0.174934       0.168000   -9999.000000       0.111500   -9999.000000
56751     56751     yunnan         100.1100       25.4200          138       120     2012      04        08        099              0.000000      16.745819       1.460417       0.188821       0.176500   -9999.000000       0.116900       0.116000
56751     56751     yunnan         100.1100       25.4200          138       120     2012      04        09        100              0.000000      15.937256       1.852555       0.201606       0.169000   -9999.000000       0.134800       0.102000
56751     56751     yunnan         100.1100       25.4200          138       120     2012      04        10        101              0.000000      16.628052       0.352921       0.208853   -9999.000000   -9999.000000   -9999.000000       0.076000
56751     56751     yunnan         100.1100       25.4200          138       120     2012      04        11        102              0.000000      16.842194       0.332919       0.204178   -9999.000000   -9999.000000   -9999.000000       0.192000
56751     56751     yunnan         100.1100       25.4200          138       120     2012      04        12        103              0.000000      17.720703       0.761249       0.197192       0.192000   -9999.000000   -9999.000000   -9999.000000
56751     56751     yunnan         100.1100       25.4200          138       120     2012      04        13        104              0.000000      17.585419       0.253311       0.190895       0.171000   -9999.000000       0.144100       0.097000
56751     56751     yunnan         100.1100       25.4200          138       120     2012      04        14        105              0.000000      18.822296       0.011903       0.182571       0.178500   -9999.000000       0.152400   -9999.000000
56751     56751     yunnan         100.1100       25.4200          138       120     2012      04        15        106              0.000000      20.176575       2.572986       0.171719   -9999.000000   -9999.000000       0.122000       0.111000
56751     56751     yunnan         100.1100       25.4200          138       120     2012      04        16        107              0.000000      21.145325       0.000000       0.162329   -9999.000000   -9999.000000   -9999.000000       0.139000
56751     56751     yunnan         100.1100       25.4200          138       120     2012      04        17        108              0.000000      18.312073       0.095872       0.159067       0.206000   -9999.000000   -9999.000000   -9999.000000
56751     56751     yunnan         100.1100       25.4200          138       120     2012      04        18        109              0.000000      19.366028       0.108227       0.154604       0.167000   -9999.000000   -9999.000000       0.119000
56751     56751     yunnan         100.1100       25.4200          138       120     2012      04        19        110              0.000000      20.886627       0.664719       0.149038       0.189500   -9999.000000       0.127000   -9999.000000
56751     56751     yunnan         100.1100       25.4200          138       120     2012      04        20        111              0.000000      18.896149       0.085587       0.154810       0.163000   -9999.000000       0.116400       0.146000
56751     56751     yunnan         100.1100       25.4200          138       120     2012      04        21        112              0.000000      19.628510       0.000000       0.152685   -9999.000000   -9999.000000   -9999.000000       0.119000
56751     56751     yunnan         100.1100       25.4200          138       120     2012      04        22        113              0.000000      22.320465       4.325633       0.145272       0.172000   -9999.000000   -9999.000000       0.522000
56751     56751     yunnan         100.1100       25.4200          138       120     2012      04        23        114              0.000000      17.847260       0.000000       0.190615       0.136500   -9999.000000   -9999.000000       0.555000
56751     56751     yunnan         100.1100       25.4200          138       120     2012      04        24        115              0.000000      19.621368       0.475618       0.181174       0.140500   -9999.000000       0.148000   -9999.000000
56751     56751     yunnan         100.1100       25.4200          138       120     2012      04        25        116              0.000000      20.525208       0.813525       0.166532       0.136000   -9999.000000       0.149600       0.078000
56751     56751     yunnan         100.1100       25.4200          138       120     2012      04        26        117              0.000000      20.098175       4.127734       0.166634   -9999.000000   -9999.000000       0.137000   -9999.000000
56751     56751     yunnan         100.1100       25.4200          138       120     2012      04        27        118              0.000000      18.391083       0.550293       0.162144   -9999.000000   -9999.000000   -9999.000000       0.009000
56751     56751     yunnan         100.1100       25.4200          138       120     2012      04        28        119              0.000000      19.691101       0.397292       0.157028       0.147500   -9999.000000   -9999.000000       0.284000
56751     56751     yunnan         100.1100       25.4200          138       120     2012      04        29        120              0.000000      18.324219       0.355469       0.157485       0.162000   -9999.000000   -9999.000000   -9999.000000
56751     56751     yunnan         100.1100       25.4200          138       120     2012      04        30        121              0.000000      17.992615       0.122754       0.160403       0.149000   -9999.000000       0.126800       0.036000
56751     56751     yunnan         100.1100       25.4200          138       120     2012      05        01        122              0.000000      17.588226       0.073775       0.157466   -9999.000000   -9999.000000       0.122300   -9999.000000
56751     56751     yunnan         100.1100       25.4200          138       120     2012      05        02        123              0.000000      21.135712       2.412877       0.149270   -9999.000000   -9999.000000       0.107900       0.078000
56751     56751     yunnan         100.1100       25.4200          138       120     2012      05        03        124              0.000000      21.188629       0.170235       0.140895       0.169500   -9999.000000   -9999.000000       0.217000
56751     56751     yunnan         100.1100       25.4200          138       120     2012      05        04        125              0.000000      21.419556       0.000000       0.135219       0.144500   -9999.000000   -9999.000000   -9999.000000
56751     56751     yunnan         100.1100       25.4200          138       120     2012      05        05        126              0.000000      23.538208       1.860144       0.129378       0.141500   -9999.000000       0.107000       0.190000
56751     56751     yunnan         100.1100       25.4200          138       120     2012      05        06        127              0.000000      24.890594       0.111903       0.124562   -9999.000000   -9999.000000       0.123800   -9999.000000
56751     56751     yunnan         100.1100       25.4200          138       120     2012      05        07        128              0.000000      21.112274       0.176823       0.124586   -9999.000000   -9999.000000       0.115400       0.215000
56751     56751     yunnan         100.1100       25.4200          138       120     2012      05        08        129              0.000000      23.933868       0.245456       0.123001   -9999.000000   -9999.000000   -9999.000000       0.242000
56751     56751     yunnan         100.1100       25.4200          138       120     2012      05        09        130              0.000000      25.431549       1.101675       0.120974       0.130000   -9999.000000   -9999.000000       0.279000
56751     56751     yunnan         100.1100       25.4200          138       120     2012      05        10        131              0.000000      26.723267       0.678741       0.117517       0.147500   -9999.000000   -9999.000000       0.327000
56751     56751     yunnan         100.1100       25.4200          138       120     2012      05        11        132              0.000000      27.334595       1.990607       0.115448       0.166000   -9999.000000       0.131600   -9999.000000
56751     56751     yunnan         100.1100       25.4200          138       120     2012      05        12        133              0.000000      27.485840       0.000000       0.113976   -9999.000000   -9999.000000       0.123300       0.257000
56751     56751     yunnan         100.1100       25.4200          138       120     2012      05        13        134              0.000000      27.017731       0.000000       0.113104   -9999.000000   -9999.000000       0.125400   -9999.000000
56751     56751     yunnan         100.1100       25.4200          138       120     2012      05        14        135              0.000000      25.220184       0.534316       0.113176       0.193500   -9999.000000   -9999.000000       0.208000
56751     56751     yunnan         100.1100       25.4200          138       120     2012      05        15        136              0.000000      24.215546       0.189495       0.114761       0.182000   -9999.000000   -9999.000000       0.223000
56751     56751     yunnan         100.1100       25.4200          138       120     2012      05        16        137              0.000000      24.980652       0.105055       0.113858       0.175500   -9999.000000   -9999.000000   -9999.000000
56751     56751     yunnan         100.1100       25.4200          138       120     2012      05        17        138              0.000000      25.092346       3.900799       0.113606   -9999.000000   -9999.000000       0.123600       0.229000
56751     56751     yunnan         100.1100       25.4200          138       120     2012      05        18        139              0.000000      23.927887       0.460680       0.111692   -9999.000000   -9999.000000       0.123900   -9999.000000
56751     56751     yunnan         100.1100       25.4200          138       120     2012      05        19        140              0.000000      26.878571       0.000000       0.110203       0.187500   -9999.000000       0.106900       0.262000
56751     56751     yunnan         100.1100       25.4200          138       120     2012      05        20        141              0.000000      28.108582       0.141856       0.109137       0.147000   -9999.000000   -9999.000000       0.306000
56751     56751     yunnan         100.1100       25.4200          138       120     2012      05        21        142              0.000000      28.083984       3.169894       0.108753       0.183000   -9999.000000   -9999.000000       0.119000
56751     56751     yunnan         100.1100       25.4200          138       120     2012      05        22        143              0.000000      28.370453       0.055107       0.108663   -9999.000000   -9999.000000       0.108100       0.449000
56751     56751     yunnan         100.1100       25.4200          138       120     2012      05        23        144              0.000000      27.236023       0.090180       0.108725   -9999.000000   -9999.000000       0.102800   -9999.000000
56751     56751     yunnan         100.1100       25.4200          138       120     2012      05        24        145              0.000000      26.056427       0.197696       0.108747       0.189000   -9999.000000       0.090100       0.097000
56751     56751     yunnan         100.1100       25.4200          138       120     2012      05        25        146              0.000000      27.862305       0.000000       0.107660       0.171000   -9999.000000   -9999.000000   -9999.000000
56751     56751     yunnan         100.1100       25.4200          138       120     2012      05        26        147              0.000000      29.253662       1.847775       0.106649       0.186000   -9999.000000   -9999.000000       0.303000
56751     56751     yunnan         100.1100       25.4200          138       120     2012      05        27        148              0.000000      29.401031       0.248887       0.106602       0.180000   -9999.000000   -9999.000000       0.368000
56751     56751     yunnan         100.1100       25.4200          138       120     2012      05        28        149              0.000000      29.725677       0.461159       0.106748   -9999.000000   -9999.000000       0.095600   -9999.000000
56751     56751     yunnan         100.1100       25.4200          138       120     2012      05        29        150              0.000000      29.143860      34.961563       0.110192   -9999.000000   -9999.000000       0.136900       0.471000
56751     56751     yunnan         100.1100       25.4200          138       120     2012      05        30        151              0.000000      28.401855       8.393309       0.251483       0.268000   -9999.000000       0.113100   -9999.000000
56751     56751     yunnan         100.1100       25.4200          138       120     2012      05        31        152              0.000000      21.093323       3.921695       0.303589       0.281500       0.164800   -9999.000000   -9999.000000
56751     56751     yunnan         100.1100       25.4200          138       120     2012      06        01        153              0.000000      21.070892       9.670896       0.281295   -9999.000000   -9999.000000   -9999.000000       0.834000
56751     56751     yunnan         100.1100       25.4200          138       120     2012      06        02        154              0.000000      21.792908       9.598057       0.297682   -9999.000000   -9999.000000   -9999.000000   -9999.000000
56751     56751     yunnan         100.1100       25.4200          138       120     2012      06        03        155              0.000000      21.686768       5.922313       0.311639   -9999.000000   -9999.000000       0.118200       0.999000
56751     56751     yunnan         100.1100       25.4200          138       120     2012      06        04        156              0.000000      20.994263       0.335062       0.309491       0.187500   -9999.000000       0.149300   -9999.000000
56751     56751     yunnan         100.1100       25.4200          138       120     2012      06        05        157              0.000000      22.166840       1.463781       0.289374       0.176000   -9999.000000   -9999.000000       0.482000
56751     56751     yunnan         100.1100       25.4200          138       120     2012      06        06        158              0.000000      22.918030       0.000000       0.273822       0.170500   -9999.000000   -9999.000000       0.485000
56751     56751     yunnan         100.1100       25.4200          138       120     2012      06        07        159              0.000000      23.707611       0.000000       0.262090   -9999.000000   -9999.000000   -9999.000000       0.412000
56751     56751     yunnan         100.1100       25.4200          138       120     2012      06        08        160              0.000000      25.099182       0.000000       0.251225   -9999.000000   -9999.000000       0.126900       0.501000
56751     56751     yunnan         100.1100       25.4200          138       120     2012      06        09        161              0.000000      24.792542       0.095760       0.241306       0.168500   -9999.000000       0.118300   -9999.000000
56751     56751     yunnan         100.1100       25.4200          138       120     2012      06        10        162              0.000000      25.181885       0.902258       0.232041       0.187000   -9999.000000       0.118200       0.389000
56751     56751     yunnan         100.1100       25.4200          138       120     2012      06        11        163              0.000000      22.874329       6.037889       0.234662       0.198000   -9999.000000   -9999.000000   -9999.000000
56751     56751     yunnan         100.1100       25.4200          138       120     2012      06        12        164              0.000000      21.787323       0.250083       0.264683   -9999.000000   -9999.000000   -9999.000000       0.401000
56751     56751     yunnan         100.1100       25.4200          138       120     2012      06        13        165              0.000000      22.558624       1.144279       0.253191   -9999.000000   -9999.000000   -9999.000000       0.549000
56751     56751     yunnan         100.1100       25.4200          138       120     2012      06        14        166              0.000000      22.884094      13.927742       0.241531       0.238000       0.121500       0.071200   -9999.000000
56751     56751     yunnan         100.1100       25.4200          138       120     2012      06        15        167              0.000000      23.447235       9.408987       0.264402       0.197000   -9999.000000       0.070500       0.535000
56751     56751     yunnan         100.1100       25.4200          138       120     2012      06        16        168              0.000000      21.313293      10.372993       0.309148       0.205500   -9999.000000       0.064600   -9999.000000
56751     56751     yunnan         100.1100       25.4200          138       120     2012      06        17        169              0.000000      21.242096       6.644005       0.309489       0.189000   -9999.000000   -9999.000000       0.786000
56751     56751     yunnan         100.1100       25.4200          138       120     2012      06        18        170              0.000000      21.253693       6.928605       0.312369   -9999.000000   -9999.000000   -9999.000000       0.979000
56751     56751     yunnan         100.1100       25.4200          138       120     2012      06        19        171              0.000000      23.265747       2.560504       0.314514       0.238000       0.203500       0.057800       0.874000
56751     56751     yunnan         100.1100       25.4200          138       120     2012      06        20        172              0.000000      22.721191      28.205517       0.307625   -9999.000000   -9999.000000       0.068900       1.000000
56751     56751     yunnan         100.1100       25.4200          138       120     2012      06        21        173              0.000000      21.758270       5.014459       0.342879       0.211500       0.260000       0.073500   -9999.000000
56751     56751     yunnan         100.1100       25.4200          138       120     2012      06        22        174              0.000000      22.104248       3.820611       0.330869   -9999.000000   -9999.000000   -9999.000000       0.803000
56751     56751     yunnan         100.1100       25.4200          138       120     2012      06        23        175              0.000000      22.046173       1.906120       0.324251   -9999.000000   -9999.000000   -9999.000000   -9999.000000
56751     56751     yunnan         100.1100       25.4200          138       120     2012      06        24        176              0.000000      21.741943       2.384498       0.311442   -9999.000000   -9999.000000   -9999.000000       0.875000
56751     56751     yunnan         100.1100       25.4200          138       120     2012      06        25        177              0.000000      20.797607       0.618188       0.312315       0.210000   -9999.000000       0.100100       0.786000
56751     56751     yunnan         100.1100       25.4200          138       120     2012      06        26        178              0.000000      21.030579       0.197721       0.304095       0.202500       0.155500       0.094700   -9999.000000
56751     56751     yunnan         100.1100       25.4200          138       120     2012      06        27        179              0.000000      21.155609       0.000000       0.297946       0.193500   -9999.000000       0.083000       0.633000
56751     56751     yunnan         100.1100       25.4200          138       120     2012      06        28        180              0.000000      22.546234       0.000000       0.289642   -9999.000000   -9999.000000   -9999.000000   -9999.000000
56751     56751     yunnan         100.1100       25.4200          138       120     2012      06        29        181              0.000000      23.421661       3.287979       0.281792   -9999.000000       0.111600   -9999.000000   -9999.000000
56751     56751     yunnan         100.1100       25.4200          138       120     2012      06        30        182              0.000000      24.349274       0.798243       0.281911       0.208000   -9999.000000   -9999.000000   -9999.000000
56751     56751     yunnan         100.1100       25.4200          138       120     2012      07        01        183              0.000000      23.178131       5.818339       0.285448       0.097000   -9999.000000       0.085000       0.791000
56751     56751     yunnan         100.1100       25.4200          138       120     2012      07        02        184              0.000000      24.009247       0.795932       0.294907       0.103500       0.276900       0.068100       0.535000
56751     56751     yunnan         100.1100       25.4200          138       120     2012      07        03        185              0.000000      23.950775       0.000000       0.286995   -9999.000000   -9999.000000       0.066200   -9999.000000
56751     56751     yunnan         100.1100       25.4200          138       120     2012      07        04        186              0.000000      22.849335       2.063764       0.279843   -9999.000000   -9999.000000   -9999.000000       0.658000
56751     56751     yunnan         100.1100       25.4200          138       120     2012      07        05        187              0.000000      21.675507      17.000572       0.283919   -9999.000000   -9999.000000   -9999.000000       0.604000
56751     56751     yunnan         100.1100       25.4200          138       120     2012      07        06        188              0.000000      22.113373       6.610335       0.311106   -9999.000000   -9999.000000       0.066700       0.757000
56751     56751     yunnan         100.1100       25.4200          138       120     2012      07        07        189              0.000000      22.143250       3.031926       0.323069   -9999.000000   -9999.000000       0.073900       0.837000
56751     56751     yunnan         100.1100       25.4200          138       120     2012      07        08        190              0.000000      22.774811       2.049191       0.313554       0.091000   -9999.000000       0.075500   -9999.000000
56751     56751     yunnan         100.1100       25.4200          138       120     2012      07        09        191              0.000000      23.815155       1.414069       0.300471   -9999.000000       0.053000   -9999.000000       0.722000
56751     56751     yunnan         100.1100       25.4200          138       120     2012      07        10        192              0.000000      23.272949       0.000000       0.301335   -9999.000000   -9999.000000   -9999.000000   -9999.000000
56751     56751     yunnan         100.1100       25.4200          138       120     2012      07        11        193              0.401412      22.989655       0.000000       0.291129       0.166500   -9999.000000   -9999.000000       0.557000
56751     56751     yunnan         100.1100       25.4200          138       120     2012      07        12        194              0.399958      23.646881       0.000000       0.283792       0.165500   -9999.000000       0.053400       0.756000
56751     56751     yunnan         100.1100       25.4200          138       120     2012      07        13        195              0.399333      23.380402       4.916662       0.278459       0.181000   -9999.000000       0.049000   -9999.000000
56751     56751     yunnan         100.1100       25.4200          138       120     2012      07        14        196              0.399042      22.621063      10.360959       0.287425   -9999.000000   -9999.000000       0.046100       0.794000
56751     56751     yunnan         100.1100       25.4200          138       120     2012      07        15        197              0.399917      23.001068       0.748832       0.310396   -9999.000000   -9999.000000   -9999.000000   -9999.000000
56751     56751     yunnan         100.1100       25.4200          138       120     2012      07        16        198              0.400750      22.008942       0.786577       0.301323       0.184500       0.107300   -9999.000000       0.755000
56751     56751     yunnan         100.1100       25.4200          138       120     2012      07        17        199              0.407000      21.653503      34.196556       0.293153       0.223000       0.101200   -9999.000000       0.737000
56751     56751     yunnan         100.1100       25.4200          138       120     2012      07        18        200              0.417167      21.457733       9.706385       0.328485   -9999.000000   -9999.000000       0.105100       0.936000
56751     56751     yunnan         100.1100       25.4200          138       120     2012      07        19        201              0.413750      21.457428       5.252806       0.344002       0.144000       0.081400       0.113000       0.927000
56751     56751     yunnan         100.1100       25.4200          138       120     2012      07        20        202              0.412333      22.371307       7.216002       0.329861   -9999.000000       0.238600       0.097800   -9999.000000
56751     56751     yunnan         100.1100       25.4200          138       120     2012      07        21        203              0.411522      22.255096       0.190422       0.331469       0.240000   -9999.000000   -9999.000000       0.793000
56751     56751     yunnan         100.1100       25.4200          138       120     2012      07        22        204              0.419667      22.550354      45.389172       0.314499       0.257000       0.029600   -9999.000000   -9999.000000
56751     56751     yunnan         100.1100       25.4200          138       120     2012      07        23        205              0.429708      20.875916       4.856451       0.364441       0.227000   -9999.000000       0.095200       0.820000
56751     56751     yunnan         100.1100       25.4200          138       120     2012      07        24        206              0.428042      21.376343       2.972470       0.339935       0.204000   -9999.000000       0.094100       0.916000
56751     56751     yunnan         100.1100       25.4200          138       120     2012      07        25        207              0.425000      22.088165       0.175850       0.329926   -9999.000000   -9999.000000       0.082900   -9999.000000
56751     56751     yunnan         100.1100       25.4200          138       120     2012      07        26        208              0.423333      23.225403       3.237983       0.315460   -9999.000000   -9999.000000   -9999.000000       0.746000
56751     56751     yunnan         100.1100       25.4200          138       120     2012      07        27        209              0.421875      23.885040      25.529619       0.312119       0.185000       0.113800   -9999.000000   -9999.000000
56751     56751     yunnan         100.1100       25.4200          138       120     2012      07        28        210              0.434375      23.859680      19.996706       0.332972       0.252000   -9999.000000   -9999.000000       0.882000
56751     56751     yunnan         100.1100       25.4200          138       120     2012      07        29        211              0.426652      20.926086       0.272916       0.355774       0.202500       0.280400       0.095600       0.882000
56751     56751     yunnan         100.1100       25.4200          138       120     2012      07        30        212              0.425875      22.715393       0.151113       0.325006   -9999.000000   -9999.000000       0.085100       0.634000
56751     56751     yunnan         100.1100       25.4200          138       120     2012      07        31        213              0.425167      24.208435       8.198235       0.312366   -9999.000000   -9999.000000       0.081100       0.787000
56751     56751     yunnan         100.1100       25.4200          138       120     2012      08        01        214              0.425792      21.654053      13.971622       0.325969       0.358000       0.145200   -9999.000000   -9999.000000
56751     56751     yunnan         100.1100       25.4200          138       120     2012      08        02        215              0.425875      21.103577       1.276051       0.336712       0.270500   -9999.000000   -9999.000000       0.768000
56751     56751     yunnan         100.1100       25.4200          138       120     2012      08        03        216              0.424208      22.416504       1.015235       0.322458       0.280000   -9999.000000   -9999.000000       0.663000
56751     56751     yunnan         100.1100       25.4200          138       120     2012      08        04        217              0.422542      22.638550       2.361279       0.313598       0.231000   -9999.000000       0.083700       0.670000
56751     56751     yunnan         100.1100       25.4200          138       120     2012      08        05        218              0.419958      23.612823      12.571218       0.309654   -9999.000000   -9999.000000       0.051700       0.906000
56751     56751     yunnan         100.1100       25.4200          138       120     2012      08        06        219              0.426917      24.110809      27.088406       0.312900   -9999.000000   -9999.000000   -9999.000000   -9999.000000
56751     56751     yunnan         100.1100       25.4200          138       120     2012      08        07        220              0.426458      21.610687      11.801628       0.352802   -9999.000000       0.122000   -9999.000000       0.888000
56751     56751     yunnan         100.1100       25.4200          138       120     2012      08        08        221              0.425833      22.156342       2.761895       0.336747   -9999.000000   -9999.000000   -9999.000000   -9999.000000
56751     56751     yunnan         100.1100       25.4200          138       120     2012      08        09        222              0.424667      22.675598       1.331730       0.329045       0.257000   -9999.000000       0.118100       0.737000
56751     56751     yunnan         100.1100       25.4200          138       120     2012      08        10        223              0.422583      23.781311       5.200525       0.318377   -9999.000000   -9999.000000       0.126400       0.869000
56751     56751     yunnan         100.1100       25.4200          138       120     2012      08        11        224              0.420583      23.425720       0.152566       0.318848   -9999.000000       0.008300       0.106100   -9999.000000
56751     56751     yunnan         100.1100       25.4200          138       120     2012      08        12        225              0.416458      24.239044       0.139467       0.307598       0.277000   -9999.000000   -9999.000000       0.609000
56751     56751     yunnan         100.1100       25.4200          138       120     2012      08        13        226              0.416833      24.954895      15.377231       0.298607   -9999.000000   -9999.000000   -9999.000000   -9999.000000
56751     56751     yunnan         100.1100       25.4200          138       120     2012      08        14        227              0.419042      23.694244       2.037224       0.323465       0.239000       0.063500   -9999.000000       0.652000
56751     56751     yunnan         100.1100       25.4200          138       120     2012      08        15        228              0.419167      23.773041       4.084988       0.318423       0.263000   -9999.000000       0.181300       0.789000
56751     56751     yunnan         100.1100       25.4200          138       120     2012      08        16        229              0.416875      24.049103       0.362175       0.315779   -9999.000000   -9999.000000       0.165500       0.585000
56751     56751     yunnan         100.1100       25.4200          138       120     2012      08        17        230              0.413333      24.057770       0.485412       0.306902       0.288000   -9999.000000       0.157400       0.839000
56751     56751     yunnan         100.1100       25.4200          138       120     2012      08        18        231              0.413625      23.575409       3.459421       0.299634       0.268500   -9999.000000   -9999.000000   -9999.000000
56751     56751     yunnan         100.1100       25.4200          138       120     2012      08        19        232              0.418208      23.089386       2.651819       0.302687       0.296500       0.048400   -9999.000000       0.759000
56751     56751     yunnan         100.1100       25.4200          138       120     2012      08        20        233              0.413458      22.058624       1.216047       0.305803       0.281500   -9999.000000       0.095400   -9999.000000
56751     56751     yunnan         100.1100       25.4200          138       120     2012      08        21        234              0.416708      22.154724      10.155919       0.304260   -9999.000000       0.180200       0.110100   -9999.000000
56751     56751     yunnan         100.1100       25.4200          138       120     2012      08        22        235              0.424125      22.557007       0.267977       0.314889   -9999.000000       0.145300       0.115500   -9999.000000
56751     56751     yunnan         100.1100       25.4200          138       120     2012      08        23        236              0.421708      20.941833       5.284132       0.313129       0.240000   -9999.000000   -9999.000000   -9999.000000
56751     56751     yunnan         100.1100       25.4200          138       120     2012      08        24        237              0.422333      21.145966      11.994507       0.309005       0.171000   -9999.000000   -9999.000000   -9999.000000
56751     56751     yunnan         100.1100       25.4200          138       120     2012      08        25        238              0.000000      21.502258      41.771214       0.330885       0.259000   -9999.000000   -9999.000000   -9999.000000
56751     56751     yunnan         100.1100       25.4200          138       120     2012      08        26        239              0.422667      21.059204       7.397667       0.370007   -9999.000000   -9999.000000       0.104800       0.780000
56751     56751     yunnan         100.1100       25.4200          138       120     2012      08        27        240              0.420583      21.138733       5.527022       0.339670   -9999.000000   -9999.000000       0.134000       0.845000
56751     56751     yunnan         100.1100       25.4200          138       120     2012      08        28        241              0.417917      22.288879       0.316957       0.332439       0.252000   -9999.000000       0.125800   -9999.000000
56751     56751     yunnan         100.1100       25.4200          138       120     2012      08        29        242              0.415833      22.649841       0.057290       0.320716       0.204000   -9999.000000   -9999.000000       0.656000
56751     56751     yunnan         100.1100       25.4200          138       120     2012      08        30        243              0.413417      22.996948       0.117703       0.313786       0.215500   -9999.000000   -9999.000000   -9999.000000
56751     56751     yunnan         100.1100       25.4200          138       120     2012      08        31        244              0.410583      23.396881       0.131435       0.308619       0.193000   -9999.000000   -9999.000000       0.568000
56751     56751     yunnan         100.1100       25.4200          138       120     2012      09        01        245              0.408875      23.293701       4.848664       0.304815   -9999.000000   -9999.000000       0.138400       0.635000
56751     56751     yunnan         100.1100       25.4200          138       120     2012      09        02        246              0.435042      23.498016      16.866642       0.308210   -9999.000000   -9999.000000       0.137400       0.663000
56751     56751     yunnan         100.1100       25.4200          138       120     2012      09        03        247              0.429292      21.107025       0.534701       0.337356       0.286000   -9999.000000       0.071100       0.697000
56751     56751     yunnan         100.1100       25.4200          138       120     2012      09        04        248              0.426250      20.174530       0.254432       0.317580       0.292000   -9999.000000   -9999.000000   -9999.000000
56751     56751     yunnan         100.1100       25.4200          138       120     2012      09        05        249              0.424667      19.824219       1.817357       0.310984       0.253000   -9999.000000   -9999.000000       0.602000
56751     56751     yunnan         100.1100       25.4200          138       120     2012      09        06        250              0.423250      19.615814       0.237967       0.311894   -9999.000000       0.105000       0.072500   -9999.000000
56751     56751     yunnan         100.1100       25.4200          138       120     2012      09        07        251              0.420833      21.779541       2.103017       0.306380   -9999.000000   -9999.000000       0.081800       0.425000
56751     56751     yunnan         100.1100       25.4200          138       120     2012      09        08        252              0.419250      22.272308       0.356323       0.304696   -9999.000000       0.156200       0.088100       0.813000
56751     56751     yunnan         100.1100       25.4200          138       120     2012      09        09        253              0.416708      22.368652       0.296038       0.304288       0.235000       0.124400   -9999.000000   -9999.000000
56751     56751     yunnan         100.1100       25.4200          138       120     2012      09        10        254              0.413042      22.952759       0.000000       0.300287       0.264000   -9999.000000   -9999.000000       0.625000
56751     56751     yunnan         100.1100       25.4200          138       120     2012      09        11        255              0.411125      22.759888       1.046880       0.296948       0.260000   -9999.000000   -9999.000000   -9999.000000
56751     56751     yunnan         100.1100       25.4200          138       120     2012      09        12        256              0.418625      21.541168      21.082960       0.299158   -9999.000000   -9999.000000       0.070500       0.953000
56751     56751     yunnan         100.1100       25.4200          138       120     2012      09        13        257              0.433542      22.007324       5.689712       0.319178   -9999.000000   -9999.000000       0.065200       0.918000
56751     56751     yunnan         100.1100       25.4200          138       120     2012      09        14        258              0.427458      19.339294       0.486592       0.337563       0.303000       0.106700       0.060500       0.614000
56751     56751     yunnan         100.1100       25.4200          138       120     2012      09        15        259              0.425708      18.931976       5.513260       0.319482       0.365000   -9999.000000   -9999.000000       0.834000
56751     56751     yunnan         100.1100       25.4200          138       120     2012      09        16        260              0.427125      17.975281       2.319835       0.322610       0.334000       0.058400   -9999.000000   -9999.000000
56751     56751     yunnan         100.1100       25.4200          138       120     2012      09        17        261              0.425458      18.070251       0.028919       0.323058   -9999.000000       0.039600   -9999.000000       0.754000
56751     56751     yunnan         100.1100       25.4200          138       120     2012      09        18        262              0.424167      19.152435       0.068958       0.314349   -9999.000000   -9999.000000       0.053700   -9999.000000
56751     56751     yunnan         100.1100       25.4200          138       120     2012      09        19        263              0.423167      19.981995       0.271940       0.309608       0.308500       0.023100       0.049500       0.615000
56751     56751     yunnan         100.1100       25.4200          138       120     2012      09        20        264              0.422667      20.293243       1.821455       0.307008       0.315000   -9999.000000       0.049000       0.817000
56751     56751     yunnan         100.1100       25.4200          138       120     2012      09        21        265              0.421583      19.788910       0.177046       0.309771   -9999.000000   -9999.000000   -9999.000000   -9999.000000
56751     56751     yunnan         100.1100       25.4200          138       120     2012      09        22        266              0.420292      19.992706       0.430551       0.306125   -9999.000000   -9999.000000   -9999.000000       0.523000
56751     56751     yunnan         100.1100       25.4200          138       120     2012      09        23        267              0.419083      19.877472       0.000000       0.305199   -9999.000000   -9999.000000       0.050400   -9999.000000
56751     56751     yunnan         100.1100       25.4200          138       120     2012      09        24        268              0.416208      20.607391       0.136551       0.301164       0.219000   -9999.000000       0.073500       0.638000
56751     56751     yunnan         100.1100       25.4200          138       120     2012      09        25        269              0.412250      21.250732       0.115312       0.297418       0.176500   -9999.000000       0.062500       0.631000
56751     56751     yunnan         100.1100       25.4200          138       120     2012      09        26        270              0.410875      21.865631       0.650284       0.294402       0.188000       0.082100   -9999.000000   -9999.000000
56751     56751     yunnan         100.1100       25.4200          138       120     2012      09        27        271              0.410929      21.888214      12.090656       0.293545   -9999.000000   -9999.000000   -9999.000000       0.589000
56751     56751     yunnan         100.1100       25.4200          138       120     2012      09        28        272              0.425533      20.924652      41.216076       0.318341   -9999.000000   -9999.000000   -9999.000000   -9999.000000
56751     56751     yunnan         100.1100       25.4200          138       120     2012      09        29        273              0.425708      20.452118      16.237919       0.349902   -9999.000000   -9999.000000       0.077700       0.881000
56751     56751     yunnan         100.1100       25.4200          138       120     2012      09        30        274              0.419500      19.964569       0.169104       0.356467       0.198500   -9999.000000       0.069700       0.753000
56751     56751     yunnan         100.1100       25.4200          138       120     2012      10        01        275              0.416583      20.954163       0.067168       0.328629       0.331500   -9999.000000       0.086000       0.635000
56751     56751     yunnan         100.1100       25.4200          138       120     2012      10        02        276              0.416167      20.883759       0.793558       0.319462       0.331500       0.114700   -9999.000000       0.784000
56751     56751     yunnan         100.1100       25.4200          138       120     2012      10        03        277              0.416000      20.762115       0.974465       0.315805   -9999.000000   -9999.000000   -9999.000000   -9999.000000
56751     56751     yunnan         100.1100       25.4200          138       120     2012      10        04        278              0.404250      20.269287       0.676886       0.312531   -9999.000000   -9999.000000   -9999.000000       0.712000
56751     56751     yunnan         100.1100       25.4200          138       120     2012      10        05        279              0.403542      20.347809       2.086412       0.310856       0.378000   -9999.000000       0.100100   -9999.000000
56751     56751     yunnan         100.1100       25.4200          138       120     2012      10        06        280              0.407458      20.030212       8.728446       0.312876       0.405000   -9999.000000       0.101400       0.756000
56751     56751     yunnan         100.1100       25.4200          138       120     2012      10        07        281              0.408417      20.567017       0.957495       0.324293       0.325000   -9999.000000       0.101400       0.898000
56751     56751     yunnan         100.1100       25.4200          138       120     2012      10        08        282              0.404042      20.358063       1.981026       0.321350   -9999.000000   -9999.000000   -9999.000000   -9999.000000
56751     56751     yunnan         100.1100       25.4200          138       120     2012      10        09        283              0.398667      20.194641       8.083946       0.317741   -9999.000000   -9999.000000   -9999.000000       0.661000
56751     56751     yunnan         100.1100       25.4200          138       120     2012      10        10        284              0.403833      20.384613       1.867709       0.321033   -9999.000000   -9999.000000       0.077200   -9999.000000
56751     56751     yunnan         100.1100       25.4200          138       120     2012      10        11        285              0.400958      19.758972       1.505364       0.322920       0.310500   -9999.000000       0.083600       0.703000
56751     56751     yunnan         100.1100       25.4200          138       120     2012      10        12        286              0.409500      19.126129      10.267980       0.316611       0.316500   -9999.000000       0.072200       1.000000
56751     56751     yunnan         100.1100       25.4200          138       120     2012      10        13        287              0.406417      18.273346       0.082750       0.333887       0.289000   -9999.000000   -9999.000000       0.712000
56751     56751     yunnan         100.1100       25.4200          138       120     2012      10        14        288              0.397208      19.147369       1.156639       0.318811   -9999.000000       0.055400   -9999.000000       0.811000
56751     56751     yunnan         100.1100       25.4200          138       120     2012      10        15        289              0.390542      19.382568       1.425447       0.311402   -9999.000000   -9999.000000   -9999.000000   -9999.000000
56751     56751     yunnan         100.1100       25.4200          138       120     2012      10        16        290              0.386625      19.129395       1.770605       0.307004       0.231000   -9999.000000       0.151800       0.407000
56751     56751     yunnan         100.1100       25.4200          138       120     2012      10        17        291              0.384667      18.986053       0.000000       0.303824       0.245500   -9999.000000       0.146100   -9999.000000
56751     56751     yunnan         100.1100       25.4200          138       120     2012      10        18        292              0.383458      18.275696       0.000000       0.302008       0.267500   -9999.000000       0.132300       0.389000
56751     56751     yunnan         100.1100       25.4200          138       120     2012      10        19        293              0.382208      17.662720       2.370336       0.300316   -9999.000000   -9999.000000   -9999.000000       0.548000
56751     56751     yunnan         100.1100       25.4200          138       120     2012      10        20        294              0.381417      17.877625       9.977460       0.298324   -9999.000000   -9999.000000   -9999.000000   -9999.000000
56751     56751     yunnan         100.1100       25.4200          138       120     2012      10        21        295              0.381167      17.457855       0.000000       0.296511   -9999.000000   -9999.000000       0.131600       0.277000
56751     56751     yunnan         100.1100       25.4200          138       120     2012      10        22        296              0.381208      17.200043       0.000000       0.295083   -9999.000000   -9999.000000       0.188600   -9999.000000
56751     56751     yunnan         100.1100       25.4200          138       120     2012      10        23        297              0.381292      17.146454       0.000000       0.294050   -9999.000000   -9999.000000       0.197800       0.342000
56751     56751     yunnan         100.1100       25.4200          138       120     2012      10        24        298              0.380583      17.039642       0.804145       0.292708   -9999.000000   -9999.000000   -9999.000000       0.495000
56751     56751     yunnan         100.1100       25.4200          138       120     2012      10        25        299              0.000000      16.967377       0.000000       0.291483   -9999.000000   -9999.000000   -9999.000000   -9999.000000
56751     56751     yunnan         100.1100       25.4200          138       120     2012      10        26        300              0.379333      16.746857       0.617414       0.289976   -9999.000000   -9999.000000   -9999.000000       0.264000
56751     56751     yunnan         100.1100       25.4200          138       120     2012      10        27        301              0.379292      16.592133       1.671667       0.288358       0.494000   -9999.000000       0.182100   -9999.000000
56751     56751     yunnan         100.1100       25.4200          138       120     2012      10        28        302              0.000000      16.597565       0.085105       0.286854       0.492000   -9999.000000       0.175700       0.349000
56751     56751     yunnan         100.1100       25.4200          138       120     2012      10        29        303              0.379167      16.935181       1.843122       0.285654       0.491000   -9999.000000       0.174000       0.470000
56751     56751     yunnan         100.1100       25.4200          138       120     2012      10        30        304              0.379208      17.187073       0.126176       0.284311   -9999.000000   -9999.000000   -9999.000000       0.324000
56751     56751     yunnan         100.1100       25.4200          138       120     2012      10        31        305              0.379208      16.575317       0.087173       0.282829   -9999.000000   -9999.000000   -9999.000000       0.387000
56751     56751     yunnan         100.1100       25.4200          138       120     2012      11        01        306              0.379000      15.947021       1.335051       0.281567   -9999.000000   -9999.000000   -9999.000000   -9999.000000
56751     56751     yunnan         100.1100       25.4200          138       120     2012      11        02        307              0.000000      15.426544       0.035379       0.280069       0.358000   -9999.000000       0.200300       0.296000
56751     56751     yunnan         100.1100       25.4200          138       120     2012      11        03        308              0.000000      14.840790       0.128371       0.278327       0.450500   -9999.000000       0.207200   -9999.000000
56751     56751     yunnan         100.1100       25.4200          138       120     2012      11        04        309              0.000000      14.950409       0.484000       0.277885       0.432000   -9999.000000       0.179800       0.246000
56751     56751     yunnan         100.1100       25.4200          138       120     2012      11        05        310              0.000000      15.328247       0.078559       0.277046   -9999.000000   -9999.000000   -9999.000000       0.327000
56751     56751     yunnan         100.1100       25.4200          138       120     2012      11        06        311              0.000000      15.637756       3.468524       0.276871   -9999.000000   -9999.000000   -9999.000000   -9999.000000
56751     56751     yunnan         100.1100       25.4200          138       120     2012      11        07        312              0.000000      14.778625       6.356731       0.286744       0.488000   -9999.000000       0.191300       0.486000
56751     56751     yunnan         100.1100       25.4200          138       120     2012      11        08        313              0.000000      14.967438       0.066680       0.310515       0.474500   -9999.000000       0.199300   -9999.000000
56751     56751     yunnan         100.1100       25.4200          138       120     2012      11        09        314              0.000000      14.882233       0.000000       0.296380       0.488500   -9999.000000       0.208700       0.234000
56751     56751     yunnan         100.1100       25.4200          138       120     2012      11        10        315              0.000000      14.334198       0.000000       0.290825   -9999.000000   -9999.000000   -9999.000000       0.376000
56751     56751     yunnan         100.1100       25.4200          138       120     2012      11        11        316              0.000000      14.149292       0.000000       0.287557   -9999.000000   -9999.000000   -9999.000000       0.197000
56751     56751     yunnan         100.1100       25.4200          138       120     2012      11        12        317              0.000000      13.939423       0.000000       0.285757       0.487000   -9999.000000   -9999.000000       0.383000
56751     56751     yunnan         100.1100       25.4200          138       120     2012      11        13        318              0.000000      14.481567       0.164762       0.283610       0.489500   -9999.000000       0.212100   -9999.000000
56751     56751     yunnan         100.1100       25.4200          138       120     2012      11        14        319              0.000000      14.346405       1.273862       0.283099       0.490000   -9999.000000       0.192000       0.206000
56751     56751     yunnan         100.1100       25.4200          138       120     2012      11        15        320              0.276375      13.856476       0.276789       0.287597   -9999.000000   -9999.000000       0.186000   -9999.000000
56751     56751     yunnan         100.1100       25.4200          138       120     2012      11        16        321              0.276500      14.794769       0.046269       0.284348   -9999.000000   -9999.000000   -9999.000000       0.139000
56751     56751     yunnan         100.1100       25.4200          138       120     2012      11        17        322              0.000000      13.987610       0.438179       0.282490   -9999.000000   -9999.000000   -9999.000000       0.314000
56751     56751     yunnan         100.1100       25.4200          138       120     2012      11        18        323              0.276708      13.777313       0.000000       0.280905       0.478000   -9999.000000   -9999.000000   -9999.000000
56751     56751     yunnan         100.1100       25.4200          138       120     2012      11        19        324              0.274375      13.693909       0.000000       0.279763       0.491000   -9999.000000       0.194600       0.097000
56751     56751     yunnan         100.1100       25.4200          138       120     2012      11        20        325              0.272125      13.971069       0.074965       0.278745       0.483000   -9999.000000       0.198000   -9999.000000
56751     56751     yunnan         100.1100       25.4200          138       120     2012      11        21        326              0.270875      14.025055       0.000000       0.277987   -9999.000000   -9999.000000       0.186100       0.199000
56751     56751     yunnan         100.1100       25.4200          138       120     2012      11        22        327              0.269708      14.096161       0.000000       0.276719   -9999.000000   -9999.000000   -9999.000000       0.300000
56751     56751     yunnan         100.1100       25.4200          138       120     2012      11        23        328              0.269292      13.776520       0.000000       0.275543       0.478000   -9999.000000   -9999.000000       0.096000
56751     56751     yunnan         100.1100       25.4200          138       120     2012      11        24        329              0.268250      13.637695       0.000000       0.274963       0.449000   -9999.000000       0.199600       0.053000
56751     56751     yunnan         100.1100       25.4200          138       120     2012      11        25        330              0.266417      13.583252      48.127655       0.274510       0.493000   -9999.000000       0.190900   -9999.000000
56751     56751     yunnan         100.1100       25.4200          138       120     2012      11        26        331              0.264667      13.080780       0.653096       0.274480   -9999.000000   -9999.000000       0.170500       0.231000
56751     56751     yunnan         100.1100       25.4200          138       120     2012      11        27        332              0.263292      12.743683       0.050700       0.275851   -9999.000000   -9999.000000   -9999.000000       0.302000
56751     56751     yunnan         100.1100       25.4200          138       120     2012      11        28        333              0.263000      12.445984       0.000000       0.278008   -9999.000000   -9999.000000   -9999.000000       0.105000
56751     56751     yunnan         100.1100       25.4200          138       120     2012      11        29        334              0.262375      12.514526       0.197061       0.275972       0.445000   -9999.000000   -9999.000000       0.311000
56751     56751     yunnan         100.1100       25.4200          138       120     2012      11        30        335              0.261375      12.312592       0.000000       0.275000       0.463000   -9999.000000       0.196600   -9999.000000
56751     56751     yunnan         100.1100       25.4200          138       120     2012      12        01        336              0.260417      12.247681       1.959986       0.274179       0.488000   -9999.000000       0.198400       0.176000
56751     56751     yunnan         100.1100       25.4200          138       120     2012      12        02        337              0.260292      12.170380       0.265956       0.273614   -9999.000000   -9999.000000       0.182100   -9999.000000
56751     56751     yunnan         100.1100       25.4200          138       120     2012      12        03        338              0.260000      11.765503       0.000000       0.273120   -9999.000000   -9999.000000   -9999.000000       0.127000
56751     56751     yunnan         100.1100       25.4200          138       120     2012      12        04        339              0.259375      11.509277       3.120541       0.272833       0.487000   -9999.000000   -9999.000000       0.146000
56751     56751     yunnan         100.1100       25.4200          138       120     2012      12        05        340              0.259583      11.429657       0.000000       0.272394       0.489000   -9999.000000       0.174600   -9999.000000
56751     56751     yunnan         100.1100       25.4200          138       120     2012      12        06        341              0.260000      11.539703       0.000000       0.272457       0.483500   -9999.000000       0.183000       0.138000
56751     56751     yunnan         100.1100       25.4200          138       120     2012      12        07        342              0.260000      11.762024      18.417009       0.272521   -9999.000000   -9999.000000       0.181700   -9999.000000
56751     56751     yunnan         100.1100       25.4200          138       120     2012      12        08        343              0.260250      11.128082       0.071322       0.273472   -9999.000000   -9999.000000   -9999.000000       0.093000
56751     56751     yunnan         100.1100       25.4200          138       120     2012      12        09        344              0.260333      10.372040       0.892028       0.274754       0.485000   -9999.000000   -9999.000000       0.101000
56751     56751     yunnan         100.1100       25.4200          138       120     2012      12        10        345              0.260000      11.052216       0.125498       0.274667       0.468000   -9999.000000   -9999.000000       0.071000
56751     56751     yunnan         100.1100       25.4200          138       120     2012      12        11        346              0.260000      11.109528       9.242873       0.274213       0.333000   -9999.000000       0.199600       0.055000
56751     56751     yunnan         100.1100       25.4200          138       120     2012      12        12        347              0.259875      10.730560       0.228844       0.274058   -9999.000000   -9999.000000       0.191900   -9999.000000
56751     56751     yunnan         100.1100       25.4200          138       120     2012      12        13        348              0.259292      10.913177       0.315901       0.274004   -9999.000000   -9999.000000       0.174800       0.022000
56751     56751     yunnan         100.1100       25.4200          138       120     2012      12        14        349              0.259000      10.621582       0.000000       0.273829   -9999.000000   -9999.000000   -9999.000000   -9999.000000
56751     56751     yunnan         100.1100       25.4200          138       120     2012      12        15        350              0.000000      10.459656       0.000000       0.273003       0.321000   -9999.000000   -9999.000000       0.006000
56751     56751     yunnan         100.1100       25.4200          138       120     2012      12        16        351              0.259000      10.344421       1.213767       0.272567       0.363000   -9999.000000   -9999.000000       0.079000
56751     56751     yunnan         100.1100       25.4200          138       120     2012      12        17        352              0.258375      10.463562       0.250313       0.272410       0.339000   -9999.000000       0.197000   -9999.000000
56751     56751     yunnan         100.1100       25.4200          138       120     2012      12        18        353              0.258000      10.484100       0.000000       0.272781   -9999.000000   -9999.000000       0.199600       0.188000
56751     56751     yunnan         100.1100       25.4200          138       120     2012      12        19        354              0.257458      10.371552       0.590517       0.272239   -9999.000000   -9999.000000       0.178800   -9999.000000
56751     56751     yunnan         100.1100       25.4200          138       120     2012      12        20        355              0.000000      10.844666       0.000000       0.271287       0.350000   -9999.000000   -9999.000000       0.046000
56751     56751     yunnan         100.1100       25.4200          138       120     2012      12        21        356              0.256292      10.655304       4.420107       0.270811       0.400000   -9999.000000   -9999.000000       0.143000
56751     56751     yunnan         100.1100       25.4200          138       120     2012      12        22        357              0.256000      10.255707       0.000000       0.270256       0.384000   -9999.000000       0.181300   -9999.000000
56751     56751     yunnan         100.1100       25.4200          138       120     2012      12        23        358              0.256000       9.935394       0.000000       0.269844   -9999.000000   -9999.000000       0.196400       0.009000
56751     56751     yunnan         100.1100       25.4200          138       120     2012      12        24        359              0.256000       9.802826       0.000000       0.269587   -9999.000000   -9999.000000       0.201300   -9999.000000
56751     56751     yunnan         100.1100       25.4200          138       120     2012      12        25        360              0.256292       9.675781       0.000000       0.269444   -9999.000000   -9999.000000   -9999.000000       0.026000
56751     56751     yunnan         100.1100       25.4200          138       120     2012      12        26        361              0.000000       9.550385       0.039680       0.268711       0.352000   -9999.000000   -9999.000000       0.049000
56751     56751     yunnan         100.1100       25.4200          138       120     2012      12        27        362              0.256750       8.786682       0.168516       0.268965       0.400000   -9999.000000   -9999.000000       0.026000
56751     56751     yunnan         100.1100       25.4200          138       120     2012      12        28        363              0.000000       8.553833       0.000000       0.268897       0.421000   -9999.000000       0.187700       0.152000
56751     56751     yunnan         100.1100       25.4200          138       120     2012      12        29        364              0.000000       8.846008       6.881484       0.268383   -9999.000000   -9999.000000       0.192400   -9999.000000
56751     56751     yunnan         100.1100       25.4200          138       120     2012      12        30        365              0.000000       9.414886       0.477503       0.268170   -9999.000000   -9999.000000       0.164200       0.023000
56751     56751     yunnan         100.1100       25.4200          138       120     2012      12        31        366              0.257000       9.350098       0.000000       0.268864       0.384000   -9999.000000   -9999.000000   -9999.000000
