# Supplementary material for: Research on Fusing Multisatellite Soil Moisture Data Based on Bayesian Model Averaging
Source: Hindawi journal article supplement (doi:10.1155/2018/9310838), 2018-06-25
Supplement: f1 [file 9310838.f1.zip › 2012_sm00-10cm_daily_ZDB_ZHY_56752_366days_allin.txt]

56752     56752     yunnan         100.3397       25.5000          138       121     2012      01        01        001              0.000000   -9999.000000       0.133075   -9999.000000   -9999.000000       0.143500   -9999.000000   -9999.000000
56752     56752     yunnan         100.3397       25.5000          138       121     2012      01        02        002              0.000000      10.929291       2.149756       0.286645   -9999.000000   -9999.000000       0.095200       0.227000
56752     56752     yunnan         100.3397       25.5000          138       121     2012      01        03        003              0.000000      11.352814       3.735938       0.290947   -9999.000000   -9999.000000       0.101900       0.147000
56752     56752     yunnan         100.3397       25.5000          138       121     2012      01        04        004              0.000000      10.788818       4.419195       0.300245   -9999.000000       0.121700       0.096800   -9999.000000
56752     56752     yunnan         100.3397       25.5000          138       121     2012      01        05        005              0.000000       8.813873       0.639727       0.312687       0.352000   -9999.000000   -9999.000000       0.042000
56752     56752     yunnan         100.3397       25.5000          138       121     2012      01        06        006              0.000000       8.318512       0.000000       0.309421   -9999.000000   -9999.000000   -9999.000000   -9999.000000
56752     56752     yunnan         100.3397       25.5000          138       121     2012      01        07        007              0.000000       8.820007       0.000000       0.302848   -9999.000000   -9999.000000   -9999.000000       0.150000
56752     56752     yunnan         100.3397       25.5000          138       121     2012      01        08        008              0.000000       8.259186       0.335467       0.300230   -9999.000000   -9999.000000       0.103300       0.094000
56752     56752     yunnan         100.3397       25.5000          138       121     2012      01        09        009              0.000000       8.531097       3.861409       0.298991   -9999.000000   -9999.000000       0.074900   -9999.000000
56752     56752     yunnan         100.3397       25.5000          138       121     2012      01        10        010              0.000000       9.635406       2.134386       0.302617       0.329000   -9999.000000   -9999.000000       0.246000
56752     56752     yunnan         100.3397       25.5000          138       121     2012      01        11        011              0.000000       9.827209       0.160006       0.313746   -9999.000000   -9999.000000   -9999.000000   -9999.000000
56752     56752     yunnan         100.3397       25.5000          138       121     2012      01        12        012              0.000000       9.022339       1.050679       0.305982   -9999.000000   -9999.000000   -9999.000000       0.057000
56752     56752     yunnan         100.3397       25.5000          138       121     2012      01        13        013              0.000000       9.171783       5.569489       0.304423   -9999.000000   -9999.000000       0.084100       0.208000
56752     56752     yunnan         100.3397       25.5000          138       121     2012      01        14        014              0.000000       7.469025       0.687274       0.315117   -9999.000000   -9999.000000       0.079600       0.099000
56752     56752     yunnan         100.3397       25.5000          138       121     2012      01        15        015              0.000000       7.770294       0.000000       0.313951       0.281000   -9999.000000       0.089600       0.514000
56752     56752     yunnan         100.3397       25.5000          138       121     2012      01        16        016              0.000000       8.017090       0.311334       0.306507       0.271000   -9999.000000   -9999.000000   -9999.000000
56752     56752     yunnan         100.3397       25.5000          138       121     2012      01        17        017              0.000000       8.190826       0.131376       0.303210   -9999.000000   -9999.000000   -9999.000000       0.010000
56752     56752     yunnan         100.3397       25.5000          138       121     2012      01        18        018              0.000000       7.469910       5.572231       0.301786   -9999.000000   -9999.000000   -9999.000000   -9999.000000
56752     56752     yunnan         100.3397       25.5000          138       121     2012      01        19        019              0.000000       7.777466       0.547182       0.305639   -9999.000000       0.048800       0.101400       0.163000
56752     56752     yunnan         100.3397       25.5000          138       121     2012      01        20        020              0.000000       8.427826       1.260197       0.304522       0.282000   -9999.000000       0.093600       0.074000
56752     56752     yunnan         100.3397       25.5000          138       121     2012      01        21        021              0.000000       8.748566       0.211104       0.302441       0.376000       0.015400       0.094400   -9999.000000
56752     56752     yunnan         100.3397       25.5000          138       121     2012      01        22        022              0.000000       8.770081       4.091416       0.299478   -9999.000000       0.047500   -9999.000000       0.129000
56752     56752     yunnan         100.3397       25.5000          138       121     2012      01        23        023              0.000000       8.838867       1.955406       0.297151   -9999.000000   -9999.000000   -9999.000000   -9999.000000
56752     56752     yunnan         100.3397       25.5000          138       121     2012      01        24        024              0.000000       9.095795       1.244432       0.295064   -9999.000000   -9999.000000   -9999.000000       0.220000
56752     56752     yunnan         100.3397       25.5000          138       121     2012      01        25        025              0.000000       9.056580       3.502978       0.293123   -9999.000000   -9999.000000       0.114700       0.035000
56752     56752     yunnan         100.3397       25.5000          138       121     2012      01        26        026              0.000000       9.027679       2.500252       0.291494       0.362000       0.031400       0.135200       0.037000
56752     56752     yunnan         100.3397       25.5000          138       121     2012      01        27        027              0.000000       9.975342       1.729883       0.290662   -9999.000000   -9999.000000       0.119000       0.107000
56752     56752     yunnan         100.3397       25.5000          138       121     2012      01        28        028              0.000000      10.420197       0.000000       0.288094   -9999.000000   -9999.000000   -9999.000000   -9999.000000
56752     56752     yunnan         100.3397       25.5000          138       121     2012      01        29        029              0.000000      10.086334       0.672304       0.286606   -9999.000000   -9999.000000   -9999.000000       0.049000
56752     56752     yunnan         100.3397       25.5000          138       121     2012      01        30        030              0.000000      10.175720       0.187929       0.284989   -9999.000000   -9999.000000       0.121100       0.179000
56752     56752     yunnan         100.3397       25.5000          138       121     2012      01        31        031              0.000000      10.521271       9.112773       0.283874       0.386000   -9999.000000       0.126200       0.051000
56752     56752     yunnan         100.3397       25.5000          138       121     2012      02        01        032              0.000000      10.852264       3.499639       0.282099       0.249000   -9999.000000   -9999.000000       0.079000
56752     56752     yunnan         100.3397       25.5000          138       121     2012      02        02        033              0.000000      10.926605       0.000000       0.280522   -9999.000000   -9999.000000   -9999.000000   -9999.000000
56752     56752     yunnan         100.3397       25.5000          138       121     2012      02        03        034              0.000000      10.557709       0.228928       0.279521   -9999.000000   -9999.000000   -9999.000000       0.264000
56752     56752     yunnan         100.3397       25.5000          138       121     2012      02        04        035              0.000000      10.782104       0.000000       0.278784       0.215000   -9999.000000   -9999.000000   -9999.000000
56752     56752     yunnan         100.3397       25.5000          138       121     2012      02        05        036              0.000000      11.162720       0.000000       0.277537       0.255000   -9999.000000       0.115700       0.115000
56752     56752     yunnan         100.3397       25.5000          138       121     2012      02        06        037              0.000000      11.619537       0.599504       0.275210       0.249000   -9999.000000       0.156400       0.068000
56752     56752     yunnan         100.3397       25.5000          138       121     2012      02        07        038              0.000000      11.849121       0.655701       0.273816   -9999.000000   -9999.000000       0.144600   -9999.000000
56752     56752     yunnan         100.3397       25.5000          138       121     2012      02        08        039              0.000000      12.240814       0.137722       0.273221   -9999.000000   -9999.000000   -9999.000000       0.137000
56752     56752     yunnan         100.3397       25.5000          138       121     2012      02        09        040              0.000000      13.108856       1.728607       0.269576   -9999.000000   -9999.000000   -9999.000000   -9999.000000
56752     56752     yunnan         100.3397       25.5000          138       121     2012      02        10        041              0.000000      13.188049       3.746577       0.268330   -9999.000000   -9999.000000   -9999.000000       0.240000
56752     56752     yunnan         100.3397       25.5000          138       121     2012      02        11        042              0.000000      12.128387       1.779145       0.277669   -9999.000000   -9999.000000       0.163100       0.086000
56752     56752     yunnan         100.3397       25.5000          138       121     2012      02        12        043              0.000000      11.321259       1.177368       0.278212   -9999.000000   -9999.000000       0.143500       0.214000
56752     56752     yunnan         100.3397       25.5000          138       121     2012      02        13        044              0.000000      10.613281       1.293367       0.277414   -9999.000000   -9999.000000       0.114600       0.134000
56752     56752     yunnan         100.3397       25.5000          138       121     2012      02        14        045              0.000000      11.732086       0.168686       0.273924   -9999.000000   -9999.000000   -9999.000000   -9999.000000
56752     56752     yunnan         100.3397       25.5000          138       121     2012      02        15        046              0.000000      12.261871       0.576957       0.270477       0.225000   -9999.000000   -9999.000000       0.226000
56752     56752     yunnan         100.3397       25.5000          138       121     2012      02        16        047              0.000000      12.961548      16.384636       0.269066       0.230000   -9999.000000       0.121600   -9999.000000
56752     56752     yunnan         100.3397       25.5000          138       121     2012      02        17        048              0.000000      13.710999       1.114330       0.265967   -9999.000000   -9999.000000       0.131100       0.211000
56752     56752     yunnan         100.3397       25.5000          138       121     2012      02        18        049              0.000000      13.995880       1.092563       0.266166   -9999.000000   -9999.000000   -9999.000000       0.173000
56752     56752     yunnan         100.3397       25.5000          138       121     2012      02        19        050              0.000000      13.623718       0.944980       0.263440   -9999.000000   -9999.000000   -9999.000000   -9999.000000
56752     56752     yunnan         100.3397       25.5000          138       121     2012      02        20        051              0.000000      12.950195       0.150584       0.262914       0.189000   -9999.000000   -9999.000000       0.043000
56752     56752     yunnan         100.3397       25.5000          138       121     2012      02        21        052              0.000000      13.240875       0.085401       0.259868       0.229000   -9999.000000   -9999.000000   -9999.000000
56752     56752     yunnan         100.3397       25.5000          138       121     2012      02        22        053              0.000000      11.952606       2.010717       0.259650       0.221000   -9999.000000       0.143200       0.278000
56752     56752     yunnan         100.3397       25.5000          138       121     2012      02        23        054              0.000000      13.005951       0.000000       0.258859   -9999.000000   -9999.000000       0.141400       0.051000
56752     56752     yunnan         100.3397       25.5000          138       121     2012      02        24        055              0.000000      13.036896       0.000000       0.258263   -9999.000000   -9999.000000       0.129400       0.071000
56752     56752     yunnan         100.3397       25.5000          138       121     2012      02        25        056              0.000000      13.977539       0.000000       0.256150       0.188000   -9999.000000   -9999.000000       0.065000
56752     56752     yunnan         100.3397       25.5000          138       121     2012      02        26        057              0.000000      14.662476       2.918694       0.251405       0.220000   -9999.000000   -9999.000000   -9999.000000
56752     56752     yunnan         100.3397       25.5000          138       121     2012      02        27        058              0.000000      14.236542       2.292633       0.249902       0.214000   -9999.000000   -9999.000000       0.019000
56752     56752     yunnan         100.3397       25.5000          138       121     2012      02        28        059              0.000000      13.571564       1.653400       0.254220   -9999.000000   -9999.000000       0.124300       0.151000
56752     56752     yunnan         100.3397       25.5000          138       121     2012      02        29        060              0.000000   -9999.000000      39.114204   -9999.000000   -9999.000000   -9999.000000   -9999.000000   -9999.000000
56752     56752     yunnan         100.3397       25.5000          138       121     2012      03        01        061              0.000000      12.783569       6.534309       0.250992   -9999.000000   -9999.000000       0.147100       0.508000
56752     56752     yunnan         100.3397       25.5000          138       121     2012      03        02        062              0.000000       9.884857      13.842514       0.280045   -9999.000000   -9999.000000   -9999.000000   -9999.000000
56752     56752     yunnan         100.3397       25.5000          138       121     2012      03        03        063              0.000000       9.415894       3.901926       0.307534   -9999.000000   -9999.000000   -9999.000000       0.387000
56752     56752     yunnan         100.3397       25.5000          138       121     2012      03        04        064              0.000000       8.535950       0.747375       0.318615   -9999.000000   -9999.000000       0.160800   -9999.000000
56752     56752     yunnan         100.3397       25.5000          138       121     2012      03        05        065              0.000000       9.634247       0.256873       0.304686   -9999.000000   -9999.000000       0.121900       0.272000
56752     56752     yunnan         100.3397       25.5000          138       121     2012      03        06        066              0.000000      11.228455       0.890972       0.295453       0.283000   -9999.000000       0.122100       0.123000
56752     56752     yunnan         100.3397       25.5000          138       121     2012      03        07        067              0.000000       9.916046       1.764590       0.292584   -9999.000000   -9999.000000   -9999.000000   -9999.000000
56752     56752     yunnan         100.3397       25.5000          138       121     2012      03        08        068              0.000000       9.441345       0.566181       0.294664       0.258000   -9999.000000   -9999.000000       0.149000
56752     56752     yunnan         100.3397       25.5000          138       121     2012      03        09        069              0.000000       9.593445       0.772143       0.291660       0.223000   -9999.000000   -9999.000000   -9999.000000
56752     56752     yunnan         100.3397       25.5000          138       121     2012      03        10        070              0.000000      11.553070       0.397647       0.288175   -9999.000000   -9999.000000       0.122000       0.038000
56752     56752     yunnan         100.3397       25.5000          138       121     2012      03        11        071              0.000000      13.248535       3.737641       0.282761   -9999.000000   -9999.000000       0.117600       0.099000
56752     56752     yunnan         100.3397       25.5000          138       121     2012      03        12        072              0.000000      14.512787       0.103296       0.282947       0.152000   -9999.000000       0.119400       0.001000
56752     56752     yunnan         100.3397       25.5000          138       121     2012      03        13        073              0.000000      14.836853       5.072756       0.276096       0.196000   -9999.000000   -9999.000000       0.175000
56752     56752     yunnan         100.3397       25.5000          138       121     2012      03        14        074              0.000000      15.774567       1.621933       0.271345       0.214000   -9999.000000   -9999.000000   -9999.000000
56752     56752     yunnan         100.3397       25.5000          138       121     2012      03        15        075              0.000000      14.099854       0.475270       0.272509   -9999.000000   -9999.000000       0.129000       0.180000
56752     56752     yunnan         100.3397       25.5000          138       121     2012      03        16        076              0.000000      14.592590       0.466702       0.267131   -9999.000000   -9999.000000       0.137200   -9999.000000
56752     56752     yunnan         100.3397       25.5000          138       121     2012      03        17        077              0.000000      13.924927       1.960273       0.263666   -9999.000000   -9999.000000       0.139700       0.184000
56752     56752     yunnan         100.3397       25.5000          138       121     2012      03        18        078              0.000000      14.526276       0.236843       0.262360       0.190000       0.077200   -9999.000000       0.211000
56752     56752     yunnan         100.3397       25.5000          138       121     2012      03        19        079              0.000000      15.349365       0.979312       0.257549       0.194000   -9999.000000   -9999.000000   -9999.000000
56752     56752     yunnan         100.3397       25.5000          138       121     2012      03        20        080              0.000000      16.343597       0.947981       0.251883   -9999.000000   -9999.000000   -9999.000000       0.086000
56752     56752     yunnan         100.3397       25.5000          138       121     2012      03        21        081              0.000000      17.276093       2.623597       0.246733   -9999.000000   -9999.000000       0.092300   -9999.000000
56752     56752     yunnan         100.3397       25.5000          138       121     2012      03        22        082              0.000000      16.570465       0.326504       0.248347       0.199000   -9999.000000       0.099800       0.188000
56752     56752     yunnan         100.3397       25.5000          138       121     2012      03        23        083              0.000000      14.931702       1.484328       0.249737       0.196000   -9999.000000       0.091000       0.346000
56752     56752     yunnan         100.3397       25.5000          138       121     2012      03        24        084              0.000000      14.125916       1.547459       0.250423       0.188000   -9999.000000   -9999.000000       0.094000
56752     56752     yunnan         100.3397       25.5000          138       121     2012      03        25        085              0.000000      15.950348       0.493577       0.245758   -9999.000000   -9999.000000   -9999.000000       0.022000
56752     56752     yunnan         100.3397       25.5000          138       121     2012      03        26        086              0.000000      16.035370       0.146620       0.242325   -9999.000000   -9999.000000   -9999.000000   -9999.000000
56752     56752     yunnan         100.3397       25.5000          138       121     2012      03        27        087              0.000000      16.773834       0.551452       0.238980   -9999.000000   -9999.000000       0.082200       0.186000
56752     56752     yunnan         100.3397       25.5000          138       121     2012      03        28        088              0.000000      16.865295       1.887667       0.238262       0.160000   -9999.000000       0.088600       0.108000
56752     56752     yunnan         100.3397       25.5000          138       121     2012      03        29        089              0.000000      17.218048       2.712999       0.237939       0.186000   -9999.000000       0.077300       0.154000
56752     56752     yunnan         100.3397       25.5000          138       121     2012      03        30        090              0.000000      17.479065      36.835976       0.233630       0.175000   -9999.000000   -9999.000000       0.223000
56752     56752     yunnan         100.3397       25.5000          138       121     2012      03        31        091              0.000000      17.944183       0.567663       0.227516   -9999.000000   -9999.000000   -9999.000000   -9999.000000
56752     56752     yunnan         100.3397       25.5000          138       121     2012      04        01        092              0.000000      16.791046       1.700784       0.225154   -9999.000000   -9999.000000       0.087600       0.040000
56752     56752     yunnan         100.3397       25.5000          138       121     2012      04        02        093              0.000000      18.244293       0.471274       0.220892       0.107000   -9999.000000       0.078400   -9999.000000
56752     56752     yunnan         100.3397       25.5000          138       121     2012      04        03        094              0.000000      19.537231       0.139262       0.214762       0.148000   -9999.000000       0.091700       0.147000
56752     56752     yunnan         100.3397       25.5000          138       121     2012      04        04        095              0.000000      19.790558       0.870032       0.209011       0.133000   -9999.000000   -9999.000000       0.092000
56752     56752     yunnan         100.3397       25.5000          138       121     2012      04        05        096              0.000000      19.057678       0.588338       0.210447   -9999.000000   -9999.000000   -9999.000000   -9999.000000
56752     56752     yunnan         100.3397       25.5000          138       121     2012      04        06        097              0.000000      18.999298       2.485459       0.209089   -9999.000000   -9999.000000   -9999.000000       0.221000
56752     56752     yunnan         100.3397       25.5000          138       121     2012      04        07        098              0.000000      16.977051       1.578980       0.225184   -9999.000000   -9999.000000       0.088400   -9999.000000
56752     56752     yunnan         100.3397       25.5000          138       121     2012      04        08        099              0.000000      15.883087       1.513268       0.230515       0.171000   -9999.000000       0.090500       0.154000
56752     56752     yunnan         100.3397       25.5000          138       121     2012      04        09        100              0.000000      14.387939       1.259577       0.239839       0.141000   -9999.000000       0.095400       0.108000
56752     56752     yunnan         100.3397       25.5000          138       121     2012      04        10        101              0.000000      14.937927       1.149785       0.241478   -9999.000000   -9999.000000   -9999.000000       0.168000
56752     56752     yunnan         100.3397       25.5000          138       121     2012      04        11        102              0.000000      15.734314       0.561997       0.239162   -9999.000000   -9999.000000   -9999.000000       0.281000
56752     56752     yunnan         100.3397       25.5000          138       121     2012      04        12        103              0.000000      16.483063       0.612716       0.234938   -9999.000000   -9999.000000   -9999.000000   -9999.000000
56752     56752     yunnan         100.3397       25.5000          138       121     2012      04        13        104              0.000000      15.893860       0.590492       0.232470       0.145000   -9999.000000       0.094200       0.112000
56752     56752     yunnan         100.3397       25.5000          138       121     2012      04        14        105              0.000000      17.430450       0.096007       0.227721       0.164000   -9999.000000       0.106600   -9999.000000
56752     56752     yunnan         100.3397       25.5000          138       121     2012      04        15        106              0.000000      19.000061       1.800143       0.218503   -9999.000000   -9999.000000       0.089800       0.365000
56752     56752     yunnan         100.3397       25.5000          138       121     2012      04        16        107              0.000000      19.881927       0.000000       0.213720   -9999.000000   -9999.000000   -9999.000000       0.275000
56752     56752     yunnan         100.3397       25.5000          138       121     2012      04        17        108              0.000000      17.969299       0.357155       0.210331   -9999.000000   -9999.000000   -9999.000000   -9999.000000
56752     56752     yunnan         100.3397       25.5000          138       121     2012      04        18        109              0.000000      18.737976       0.319781       0.207050       0.138000   -9999.000000   -9999.000000       0.122000
56752     56752     yunnan         100.3397       25.5000          138       121     2012      04        19        110              0.000000      20.080719       0.714709       0.201928       0.194000   -9999.000000       0.083300   -9999.000000
56752     56752     yunnan         100.3397       25.5000          138       121     2012      04        20        111              0.000000      17.200714       0.227502       0.207578       0.162000   -9999.000000       0.085800       0.319000
56752     56752     yunnan         100.3397       25.5000          138       121     2012      04        21        112              0.000000      19.123932       0.412966       0.205761   -9999.000000   -9999.000000   -9999.000000       0.146000
56752     56752     yunnan         100.3397       25.5000          138       121     2012      04        22        113              0.000000      21.050293       3.472002       0.200472   -9999.000000   -9999.000000   -9999.000000       0.372000
56752     56752     yunnan         100.3397       25.5000          138       121     2012      04        23        114              0.000000      17.073578       2.626284       0.225886       0.097000   -9999.000000   -9999.000000       0.127000
56752     56752     yunnan         100.3397       25.5000          138       121     2012      04        24        115              0.000000      18.944733       2.758177       0.220003       0.128000   -9999.000000       0.070500   -9999.000000
56752     56752     yunnan         100.3397       25.5000          138       121     2012      04        25        116              0.000000      19.826813       1.118286       0.220224       0.125000   -9999.000000       0.077200       0.126000
56752     56752     yunnan         100.3397       25.5000          138       121     2012      04        26        117              0.000000      18.798065       0.825163       0.222456   -9999.000000   -9999.000000       0.069300       0.174000
56752     56752     yunnan         100.3397       25.5000          138       121     2012      04        27        118              0.000000      17.697174       0.622689       0.216424   -9999.000000   -9999.000000   -9999.000000       0.108000
56752     56752     yunnan         100.3397       25.5000          138       121     2012      04        28        119              0.000000      19.033600       0.686979       0.210308       0.116000   -9999.000000   -9999.000000       0.272000
56752     56752     yunnan         100.3397       25.5000          138       121     2012      04        29        120              0.000000      17.932800       1.022321       0.208502       0.146000   -9999.000000   -9999.000000   -9999.000000
56752     56752     yunnan         100.3397       25.5000          138       121     2012      04        30        121              0.000000      16.907471       1.677181       0.211540       0.131000   -9999.000000       0.067800       0.055000
56752     56752     yunnan         100.3397       25.5000          138       121     2012      05        01        122              0.000000      17.864075       0.785549       0.212957   -9999.000000   -9999.000000       0.072100   -9999.000000
56752     56752     yunnan         100.3397       25.5000          138       121     2012      05        02        123              0.000000      20.512146       0.540412       0.207157   -9999.000000   -9999.000000       0.063600       0.256000
56752     56752     yunnan         100.3397       25.5000          138       121     2012      05        03        124              0.000000      20.270660       0.633075       0.197699       0.120000       0.097600   -9999.000000       0.224000
56752     56752     yunnan         100.3397       25.5000          138       121     2012      05        04        125              0.000000      20.673553       1.250369       0.193875       0.107000   -9999.000000   -9999.000000   -9999.000000
56752     56752     yunnan         100.3397       25.5000          138       121     2012      05        05        126              0.000000      22.843781       0.643924       0.188867       0.130000   -9999.000000       0.068400       0.326000
56752     56752     yunnan         100.3397       25.5000          138       121     2012      05        06        127              0.000000      24.037018       0.000000       0.182631   -9999.000000   -9999.000000       0.070100   -9999.000000
56752     56752     yunnan         100.3397       25.5000          138       121     2012      05        07        128              0.000000      19.868195       0.336086       0.183112   -9999.000000   -9999.000000       0.089600       0.213000
56752     56752     yunnan         100.3397       25.5000          138       121     2012      05        08        129              0.000000      22.602783       0.698569       0.180203   -9999.000000   -9999.000000   -9999.000000       0.227000
56752     56752     yunnan         100.3397       25.5000          138       121     2012      05        09        130              0.000000      24.577484       0.308339       0.178745       0.117000       0.038300   -9999.000000       0.240000
56752     56752     yunnan         100.3397       25.5000          138       121     2012      05        10        131              0.000000      25.545959       0.535278       0.170737       0.138000   -9999.000000   -9999.000000       0.340000
56752     56752     yunnan         100.3397       25.5000          138       121     2012      05        11        132              0.000000      26.111664       0.924931       0.166664       0.154000       0.091800       0.093400   -9999.000000
56752     56752     yunnan         100.3397       25.5000          138       121     2012      05        12        133              0.000000      26.638336       1.756409       0.159917   -9999.000000   -9999.000000       0.092500       0.374000
56752     56752     yunnan         100.3397       25.5000          138       121     2012      05        13        134              0.000000      26.144562       0.357805       0.155317   -9999.000000   -9999.000000       0.083400   -9999.000000
56752     56752     yunnan         100.3397       25.5000          138       121     2012      05        14        135              0.000000      23.617767       0.447265       0.156161       0.151000       0.042500   -9999.000000       0.327000
56752     56752     yunnan         100.3397       25.5000          138       121     2012      05        15        136              0.000000      23.341156       0.104583       0.156785       0.168000   -9999.000000   -9999.000000       0.274000
56752     56752     yunnan         100.3397       25.5000          138       121     2012      05        16        137              0.000000      23.618378       0.699059       0.153577       0.156000       0.092200   -9999.000000   -9999.000000
56752     56752     yunnan         100.3397       25.5000          138       121     2012      05        17        138              0.000000      23.995087       1.469773       0.154557   -9999.000000   -9999.000000       0.062000       0.197000
56752     56752     yunnan         100.3397       25.5000          138       121     2012      05        18        139              0.000000      23.362762       0.232933       0.151813   -9999.000000       0.057500       0.070000   -9999.000000
56752     56752     yunnan         100.3397       25.5000          138       121     2012      05        19        140              0.000000      26.060974       0.641760       0.148539       0.139000   -9999.000000       0.055700       0.298000
56752     56752     yunnan         100.3397       25.5000          138       121     2012      05        20        141              0.000000      27.193634       0.309567       0.143907       0.144000   -9999.000000   -9999.000000       0.433000
56752     56752     yunnan         100.3397       25.5000          138       121     2012      05        21        142              0.000000      27.859955       0.852638       0.140510       0.167000   -9999.000000   -9999.000000       0.099000
56752     56752     yunnan         100.3397       25.5000          138       121     2012      05        22        143              0.000000      28.247223       0.337448       0.138570   -9999.000000   -9999.000000       0.102800       0.293000
56752     56752     yunnan         100.3397       25.5000          138       121     2012      05        23        144              0.000000      26.835663       0.289752       0.138027   -9999.000000   -9999.000000       0.094600   -9999.000000
56752     56752     yunnan         100.3397       25.5000          138       121     2012      05        24        145              0.000000      27.284180       2.951396       0.135209   -9999.000000       0.064000       0.095200       0.357000
56752     56752     yunnan         100.3397       25.5000          138       121     2012      05        25        146              0.000000      28.079865       3.532754       0.135581       0.125000   -9999.000000   -9999.000000       0.125000
56752     56752     yunnan         100.3397       25.5000          138       121     2012      05        26        147              0.000000      28.022888       0.428158       0.156503       0.166000   -9999.000000   -9999.000000       0.348000
56752     56752     yunnan         100.3397       25.5000          138       121     2012      05        27        148              0.000000      26.437073       1.975804       0.147961       0.156000   -9999.000000   -9999.000000       0.279000
56752     56752     yunnan         100.3397       25.5000          138       121     2012      05        28        149              0.000000      27.369171       0.175096       0.140689   -9999.000000   -9999.000000       0.095400   -9999.000000
56752     56752     yunnan         100.3397       25.5000          138       121     2012      05        29        150              0.000000      28.141510      29.511702       0.136115       0.317000       0.093700       0.131600       0.430000
56752     56752     yunnan         100.3397       25.5000          138       121     2012      05        30        151              0.000000      26.477631       7.210454       0.237926       0.249000   -9999.000000       0.117100   -9999.000000
56752     56752     yunnan         100.3397       25.5000          138       121     2012      05        31        152              0.000000      19.506561       5.171455       0.306126       0.274000   -9999.000000   -9999.000000   -9999.000000
56752     56752     yunnan         100.3397       25.5000          138       121     2012      06        01        153              0.000000      19.826355      10.569261       0.294888   -9999.000000       0.173800   -9999.000000       0.774000
56752     56752     yunnan         100.3397       25.5000          138       121     2012      06        02        154              0.000000      20.673431      10.092468       0.315465   -9999.000000   -9999.000000   -9999.000000   -9999.000000
56752     56752     yunnan         100.3397       25.5000          138       121     2012      06        03        155              0.000000      20.584961       6.285507       0.325075   -9999.000000       0.160300       0.111700       0.818000
56752     56752     yunnan         100.3397       25.5000          138       121     2012      06        04        156              0.000000      20.090637       0.888730       0.324879       0.165000   -9999.000000       0.128800   -9999.000000
56752     56752     yunnan         100.3397       25.5000          138       121     2012      06        05        157              0.000000      21.640137       0.992650       0.302987       0.178000       0.111700       0.124600       0.408000
56752     56752     yunnan         100.3397       25.5000          138       121     2012      06        06        158              0.000000      22.658234       0.277375       0.291452       0.158000       0.126000   -9999.000000       0.373000
56752     56752     yunnan         100.3397       25.5000          138       121     2012      06        07        159              0.000000      23.754364       0.089517       0.278595   -9999.000000   -9999.000000   -9999.000000       0.348000
56752     56752     yunnan         100.3397       25.5000          138       121     2012      06        08        160              0.000000      24.903046       0.000000       0.267502   -9999.000000       0.072900       0.121900       0.444000
56752     56752     yunnan         100.3397       25.5000          138       121     2012      06        09        161              0.000000      24.458984       0.259064       0.258078       0.141500   -9999.000000       0.124500   -9999.000000
56752     56752     yunnan         100.3397       25.5000          138       121     2012      06        10        162              0.000000      25.028412       2.512166       0.249485       0.153000   -9999.000000       0.110100       0.314000
56752     56752     yunnan         100.3397       25.5000          138       121     2012      06        11        163              0.000000      21.445007       4.746322       0.263561   -9999.000000       0.252300   -9999.000000   -9999.000000
56752     56752     yunnan         100.3397       25.5000          138       121     2012      06        12        164              0.000000      20.251495       0.000000       0.281042   -9999.000000   -9999.000000   -9999.000000       0.500000
56752     56752     yunnan         100.3397       25.5000          138       121     2012      06        13        165              0.000000      21.941376       0.000000       0.268220   -9999.000000   -9999.000000   -9999.000000       0.438000
56752     56752     yunnan         100.3397       25.5000          138       121     2012      06        14        166              0.000000      22.245361      60.832825       0.258203       0.252000   -9999.000000       0.089300   -9999.000000
56752     56752     yunnan         100.3397       25.5000          138       121     2012      06        15        167              0.000000      22.924072       2.765652       0.325772       0.174000   -9999.000000       0.083300       0.576000
56752     56752     yunnan         100.3397       25.5000          138       121     2012      06        16        168              0.000000      19.308960       9.379077       0.353334       0.216500   -9999.000000       0.075300   -9999.000000
56752     56752     yunnan         100.3397       25.5000          138       121     2012      06        17        169              0.000000      18.877594       3.949182       0.343367       0.199000   -9999.000000   -9999.000000       0.844000
56752     56752     yunnan         100.3397       25.5000          138       121     2012      06        18        170              0.000000      20.101318       5.632720       0.338860   -9999.000000       0.134600   -9999.000000       0.984000
56752     56752     yunnan         100.3397       25.5000          138       121     2012      06        19        171              0.000000      22.404633      19.545307       0.332902       0.224000       0.234800       0.082400       0.767000
56752     56752     yunnan         100.3397       25.5000          138       121     2012      06        20        172              0.000000      21.547821      26.546734       0.350765   -9999.000000   -9999.000000       0.092000       0.898000
56752     56752     yunnan         100.3397       25.5000          138       121     2012      06        21        173              0.000000      19.727356       4.982203       0.370068       0.206000       0.263000       0.093000   -9999.000000
56752     56752     yunnan         100.3397       25.5000          138       121     2012      06        22        174              0.000000      20.776855       2.011178       0.350012       0.207000   -9999.000000   -9999.000000       0.700000
56752     56752     yunnan         100.3397       25.5000          138       121     2012      06        23        175              0.000000      20.757446       1.143024       0.338029   -9999.000000       0.236900   -9999.000000       0.840000
56752     56752     yunnan         100.3397       25.5000          138       121     2012      06        24        176              0.000000      20.920563       5.134676       0.326977   -9999.000000       0.203100   -9999.000000       0.823000
56752     56752     yunnan         100.3397       25.5000          138       121     2012      06        25        177              0.000000      19.217468       6.636244       0.331422       0.199000   -9999.000000       0.102400       0.720000
56752     56752     yunnan         100.3397       25.5000          138       121     2012      06        26        178              0.000000      19.376129       1.830021       0.335460       0.208000       0.243700       0.105700   -9999.000000
56752     56752     yunnan         100.3397       25.5000          138       121     2012      06        27        179              0.000000      20.049194       0.000000       0.329629       0.190000   -9999.000000       0.092200       0.562000
56752     56752     yunnan         100.3397       25.5000          138       121     2012      06        28        180              0.000000      21.948090       0.372480       0.316220   -9999.000000   -9999.000000   -9999.000000   -9999.000000
56752     56752     yunnan         100.3397       25.5000          138       121     2012      06        29        181              0.000000      22.855255       0.956713       0.307634   -9999.000000       0.117400   -9999.000000   -9999.000000
56752     56752     yunnan         100.3397       25.5000          138       121     2012      06        30        182              0.000000      23.991180       2.295048       0.301737       0.158000   -9999.000000   -9999.000000   -9999.000000
56752     56752     yunnan         100.3397       25.5000          138       121     2012      07        01        183              0.000000      21.946869       3.057019       0.306743       0.080000   -9999.000000       0.099700   -9999.000000
56752     56752     yunnan         100.3397       25.5000          138       121     2012      07        02        184              0.000000      22.816284       0.930818       0.307864       0.105000   -9999.000000       0.117800       0.382000
56752     56752     yunnan         100.3397       25.5000          138       121     2012      07        03        185              0.000000      23.353058       0.000000       0.301148   -9999.000000   -9999.000000       0.107700   -9999.000000
56752     56752     yunnan         100.3397       25.5000          138       121     2012      07        04        186              0.000000      21.832275       4.273183       0.296774   -9999.000000       0.287200   -9999.000000       0.709000
56752     56752     yunnan         100.3397       25.5000          138       121     2012      07        05        187              0.000000      20.404297      21.520815       0.307274   -9999.000000   -9999.000000   -9999.000000       0.624000
56752     56752     yunnan         100.3397       25.5000          138       121     2012      07        06        188              0.000000      21.018860       3.312298       0.327501   -9999.000000       0.199600       0.121400       0.692000
56752     56752     yunnan         100.3397       25.5000          138       121     2012      07        07        189              0.000000      21.144531       0.668918       0.336844   -9999.000000   -9999.000000       0.113900       0.757000
56752     56752     yunnan         100.3397       25.5000          138       121     2012      07        08        190              0.000000      22.152466       0.440413       0.322501       0.099000   -9999.000000       0.129700   -9999.000000
56752     56752     yunnan         100.3397       25.5000          138       121     2012      07        09        191              0.000000      23.818176       2.403211       0.310124   -9999.000000       0.149700   -9999.000000       0.544000
56752     56752     yunnan         100.3397       25.5000          138       121     2012      07        10        192              0.000000      22.860138       0.000000       0.311319   -9999.000000   -9999.000000   -9999.000000   -9999.000000
56752     56752     yunnan         100.3397       25.5000          138       121     2012      07        11        193              0.000000      22.443390       0.000000       0.302442       0.146000   -9999.000000   -9999.000000       0.676000
56752     56752     yunnan         100.3397       25.5000          138       121     2012      07        12        194              0.000000      23.433990       0.000000       0.295056       0.164000       0.146900       0.084300       0.484000
56752     56752     yunnan         100.3397       25.5000          138       121     2012      07        13        195              0.000000      23.009613       6.679159       0.290255       0.167000   -9999.000000       0.096700   -9999.000000
56752     56752     yunnan         100.3397       25.5000          138       121     2012      07        14        196              0.000000      21.897339       7.087706       0.303109   -9999.000000       0.133300       0.076800       0.701000
56752     56752     yunnan         100.3397       25.5000          138       121     2012      07        15        197              0.000000      22.218109       0.620487       0.316482   -9999.000000   -9999.000000   -9999.000000   -9999.000000
56752     56752     yunnan         100.3397       25.5000          138       121     2012      07        16        198              0.000000      21.375580       1.749119       0.309629       0.160000   -9999.000000   -9999.000000       0.889000
56752     56752     yunnan         100.3397       25.5000          138       121     2012      07        17        199              0.000000      20.670654      28.484467       0.305863       0.168500       0.182000   -9999.000000       0.754000
56752     56752     yunnan         100.3397       25.5000          138       121     2012      07        18        200              0.000000      20.537720      19.681065       0.340005       0.203000   -9999.000000       0.125700       0.956000
56752     56752     yunnan         100.3397       25.5000          138       121     2012      07        19        201              0.000000      20.058167      10.481513       0.364145   -9999.000000       0.116400       0.132300       1.000000
56752     56752     yunnan         100.3397       25.5000          138       121     2012      07        20        202              0.000000      20.813110       6.773963       0.354292   -9999.000000   -9999.000000       0.106900   -9999.000000
56752     56752     yunnan         100.3397       25.5000          138       121     2012      07        21        203              0.000000      21.204315       0.114290       0.346035       0.194000   -9999.000000   -9999.000000       0.690000
56752     56752     yunnan         100.3397       25.5000          138       121     2012      07        22        204              0.000000      21.485474      45.922554       0.329051   -9999.000000       0.156500   -9999.000000       0.969000
56752     56752     yunnan         100.3397       25.5000          138       121     2012      07        23        205              0.000000      19.621368       7.690818       0.374522       0.230500   -9999.000000       0.083200       0.838000
56752     56752     yunnan         100.3397       25.5000          138       121     2012      07        24        206              0.000000      19.544556       1.920921       0.355670       0.214000       0.316600       0.076400       0.858000
56752     56752     yunnan         100.3397       25.5000          138       121     2012      07        25        207              0.000000      20.742157       0.895315       0.342444   -9999.000000       0.158000       0.077600   -9999.000000
56752     56752     yunnan         100.3397       25.5000          138       121     2012      07        26        208              0.000000      21.587799       2.597773       0.331086   -9999.000000   -9999.000000   -9999.000000       0.695000
56752     56752     yunnan         100.3397       25.5000          138       121     2012      07        27        209              0.000000      22.098206      27.075090       0.327876       0.183000       0.123500   -9999.000000   -9999.000000
56752     56752     yunnan         100.3397       25.5000          138       121     2012      07        28        210              0.000000      22.915680      16.673662       0.344174   -9999.000000   -9999.000000   -9999.000000       0.846000
56752     56752     yunnan         100.3397       25.5000          138       121     2012      07        29        211              0.000000      19.547943       0.216375       0.365371       0.194000       0.175900       0.072000       0.813000
56752     56752     yunnan         100.3397       25.5000          138       121     2012      07        30        212              0.000000      21.699432       0.206176       0.337563   -9999.000000       0.113200       0.094800   -9999.000000
56752     56752     yunnan         100.3397       25.5000          138       121     2012      07        31        213              0.000000      23.406769       6.194178       0.326515   -9999.000000   -9999.000000       0.086300       0.617000
56752     56752     yunnan         100.3397       25.5000          138       121     2012      08        01        214              0.000000      20.590546      16.357475       0.336179   -9999.000000       0.170000   -9999.000000   -9999.000000
56752     56752     yunnan         100.3397       25.5000          138       121     2012      08        02        215              0.000000      20.034119       1.169194       0.348795       0.278500   -9999.000000   -9999.000000       0.721000
56752     56752     yunnan         100.3397       25.5000          138       121     2012      08        03        216              0.000000      20.769165       0.095859       0.340855       0.298000   -9999.000000   -9999.000000       0.640000
56752     56752     yunnan         100.3397       25.5000          138       121     2012      08        04        217              0.000000      20.892090       1.197145       0.329752       0.275000       0.093300       0.093700       0.491000
56752     56752     yunnan         100.3397       25.5000          138       121     2012      08        05        218              0.000000      22.759033       5.399731       0.323110   -9999.000000   -9999.000000       0.049000       0.705000
56752     56752     yunnan         100.3397       25.5000          138       121     2012      08        06        219              0.000000      23.326141      26.502512       0.324055   -9999.000000       0.114700       0.080800   -9999.000000
56752     56752     yunnan         100.3397       25.5000          138       121     2012      08        07        220              0.000000      20.817505      15.575050       0.364047   -9999.000000   -9999.000000   -9999.000000       0.793000
56752     56752     yunnan         100.3397       25.5000          138       121     2012      08        08        221              0.000000      20.959839       3.093085       0.352888       0.301000   -9999.000000   -9999.000000   -9999.000000
56752     56752     yunnan         100.3397       25.5000          138       121     2012      08        09        222              0.000000      21.280212       2.676629       0.344909       0.260000       0.105000       0.075800       0.720000
56752     56752     yunnan         100.3397       25.5000          138       121     2012      08        10        223              0.000000      22.446167       2.788116       0.335846   -9999.000000   -9999.000000       0.075900       0.800000
56752     56752     yunnan         100.3397       25.5000          138       121     2012      08        11        224              0.000000      22.380371       0.607462       0.334513   -9999.000000       0.033200       0.073100   -9999.000000
56752     56752     yunnan         100.3397       25.5000          138       121     2012      08        12        225              0.000000      23.252258       0.000000       0.324920       0.258000   -9999.000000   -9999.000000       0.515000
56752     56752     yunnan         100.3397       25.5000          138       121     2012      08        13        226              0.000000      23.877075      17.906469       0.319231   -9999.000000   -9999.000000   -9999.000000   -9999.000000
56752     56752     yunnan         100.3397       25.5000          138       121     2012      08        14        227              0.000000      22.569275       2.556584       0.342261       0.271000       0.179100   -9999.000000       0.639000
56752     56752     yunnan         100.3397       25.5000          138       121     2012      08        15        228              0.000000      22.437500       3.791028       0.339288       0.263000   -9999.000000       0.110300       0.685000
56752     56752     yunnan         100.3397       25.5000          138       121     2012      08        16        229              0.000000      22.415924       0.192560       0.335106   -9999.000000       0.157500       0.113500       0.510000
56752     56752     yunnan         100.3397       25.5000          138       121     2012      08        17        230              0.000000      22.598175       1.239045       0.327884   -9999.000000   -9999.000000       0.098700       0.521000
56752     56752     yunnan         100.3397       25.5000          138       121     2012      08        18        231              0.000000      22.275848       4.841022       0.322556       0.237000   -9999.000000   -9999.000000   -9999.000000
56752     56752     yunnan         100.3397       25.5000          138       121     2012      08        19        232              0.000000      21.392273       6.466442       0.328893       0.315000       0.191400   -9999.000000       0.829000
56752     56752     yunnan         100.3397       25.5000          138       121     2012      08        20        233              0.000000      20.075073       0.702928       0.337517       0.293000   -9999.000000       0.070200       0.672000
56752     56752     yunnan         100.3397       25.5000          138       121     2012      08        21        234              0.000000      21.312195      20.665697       0.327716   -9999.000000   -9999.000000       0.074800   -9999.000000
56752     56752     yunnan         100.3397       25.5000          138       121     2012      08        22        235              0.000000      21.015839       0.553610       0.345216   -9999.000000       0.144900       0.079400   -9999.000000
56752     56752     yunnan         100.3397       25.5000          138       121     2012      08        23        236              0.000000      19.101257       1.837441       0.343407       0.227000   -9999.000000   -9999.000000   -9999.000000
56752     56752     yunnan         100.3397       25.5000          138       121     2012      08        24        237              0.000000      19.778076      25.582680       0.333136       0.207000       0.061800   -9999.000000   -9999.000000
56752     56752     yunnan         100.3397       25.5000          138       121     2012      08        25        238              0.000000      20.358887      33.722271       0.351669       0.242000   -9999.000000   -9999.000000   -9999.000000
56752     56752     yunnan         100.3397       25.5000          138       121     2012      08        26        239              0.000000      19.986084       8.528013       0.376341   -9999.000000   -9999.000000       0.076500       0.835000
56752     56752     yunnan         100.3397       25.5000          138       121     2012      08        27        240              0.000000      19.592529       3.896815       0.358400   -9999.000000       0.099000       0.119400       0.755000
56752     56752     yunnan         100.3397       25.5000          138       121     2012      08        28        241              0.000000      20.818024       1.528469       0.345235   -9999.000000   -9999.000000       0.108000   -9999.000000
56752     56752     yunnan         100.3397       25.5000          138       121     2012      08        29        242              0.000000      21.489288       0.052159       0.338298       0.209000       0.078800   -9999.000000       0.521000
56752     56752     yunnan         100.3397       25.5000          138       121     2012      08        30        243              0.000000      21.793457       0.600325       0.334431       0.206000       0.161400   -9999.000000   -9999.000000
56752     56752     yunnan         100.3397       25.5000          138       121     2012      08        31        244              0.000000      22.123260       0.511699       0.331133       0.201000   -9999.000000   -9999.000000       0.562000
56752     56752     yunnan         100.3397       25.5000          138       121     2012      09        01        245              0.000000      22.061859      13.433074       0.328562   -9999.000000       0.044000       0.124900       0.616000
56752     56752     yunnan         100.3397       25.5000          138       121     2012      09        02        246              0.000000      22.343292      12.680071       0.334222   -9999.000000   -9999.000000       0.130200       0.591000
56752     56752     yunnan         100.3397       25.5000          138       121     2012      09        03        247              0.000000      19.099945       0.683291       0.355388   -9999.000000   -9999.000000       0.076300       0.884000
56752     56752     yunnan         100.3397       25.5000          138       121     2012      09        04        248              0.000000      18.224091       0.110646       0.337847       0.280000   -9999.000000   -9999.000000   -9999.000000
56752     56752     yunnan         100.3397       25.5000          138       121     2012      09        05        249              0.000000      18.090576       0.254183       0.332609       0.253000   -9999.000000   -9999.000000       0.456000
56752     56752     yunnan         100.3397       25.5000          138       121     2012      09        06        250              0.000000      17.830505       0.389425       0.330902   -9999.000000       0.185600       0.083900   -9999.000000
56752     56752     yunnan         100.3397       25.5000          138       121     2012      09        07        251              0.000000      19.997711       0.696203       0.327422   -9999.000000   -9999.000000       0.077800       0.503000
56752     56752     yunnan         100.3397       25.5000          138       121     2012      09        08        252              0.000000      20.413757       0.098150       0.325120   -9999.000000   -9999.000000       0.085300       0.570000
56752     56752     yunnan         100.3397       25.5000          138       121     2012      09        09        253              0.000000      20.980957       0.377740       0.323095       0.186000   -9999.000000   -9999.000000   -9999.000000
56752     56752     yunnan         100.3397       25.5000          138       121     2012      09        10        254              0.000000      21.274261       0.000000       0.321485       0.227000   -9999.000000   -9999.000000       0.429000
56752     56752     yunnan         100.3397       25.5000          138       121     2012      09        11        255              0.000000      21.329681       1.798856       0.319291       0.271000   -9999.000000   -9999.000000   -9999.000000
56752     56752     yunnan         100.3397       25.5000          138       121     2012      09        12        256              0.000000      20.253601      35.167477       0.322497   -9999.000000   -9999.000000       0.072400       1.000000
56752     56752     yunnan         100.3397       25.5000          138       121     2012      09        13        257              0.000000      19.868927       7.703850       0.350180   -9999.000000   -9999.000000       0.076000       0.980000
56752     56752     yunnan         100.3397       25.5000          138       121     2012      09        14        258              0.000000      17.230530       0.371078       0.359644   -9999.000000       0.120600       0.065800       0.555000
56752     56752     yunnan         100.3397       25.5000          138       121     2012      09        15        259              0.000000      16.911621       7.548426       0.340469       0.361000   -9999.000000   -9999.000000       0.762000
56752     56752     yunnan         100.3397       25.5000          138       121     2012      09        16        260              0.000000      16.225281       6.065465       0.343326       0.355000       0.145600   -9999.000000   -9999.000000
56752     56752     yunnan         100.3397       25.5000          138       121     2012      09        17        261              0.000000      16.667603       0.150135       0.349106   -9999.000000   -9999.000000   -9999.000000       0.713000
56752     56752     yunnan         100.3397       25.5000          138       121     2012      09        18        262              0.000000      17.671417       0.174336       0.337153   -9999.000000   -9999.000000       0.070600       0.664000
56752     56752     yunnan         100.3397       25.5000          138       121     2012      09        19        263              0.000000      18.583069       0.178583       0.332508   -9999.000000       0.085100       0.069800       0.634000
56752     56752     yunnan         100.3397       25.5000          138       121     2012      09        20        264              0.000000      18.601807       0.339788       0.329920   -9999.000000   -9999.000000       0.062400       0.698000
56752     56752     yunnan         100.3397       25.5000          138       121     2012      09        21        265              0.000000      18.421844       0.599381       0.327669   -9999.000000   -9999.000000   -9999.000000   -9999.000000
56752     56752     yunnan         100.3397       25.5000          138       121     2012      09        22        266              0.000000      18.604980       0.432812       0.326220   -9999.000000   -9999.000000   -9999.000000       0.438000
56752     56752     yunnan         100.3397       25.5000          138       121     2012      09        23        267              0.000000      18.377075       0.000000       0.326000   -9999.000000   -9999.000000       0.068600   -9999.000000
56752     56752     yunnan         100.3397       25.5000          138       121     2012      09        24        268              0.000000      19.239838       0.252315       0.323340   -9999.000000       0.105900       0.075500       0.494000
56752     56752     yunnan         100.3397       25.5000          138       121     2012      09        25        269              0.000000      20.056183       0.706829       0.321148       0.141000   -9999.000000       0.085900       0.484000
56752     56752     yunnan         100.3397       25.5000          138       121     2012      09        26        270              0.000000      20.561462       1.154463       0.318923   -9999.000000   -9999.000000   -9999.000000   -9999.000000
56752     56752     yunnan         100.3397       25.5000          138       121     2012      09        27        271              0.000000      20.438599       2.615206       0.319156   -9999.000000       0.104300   -9999.000000       0.414000
56752     56752     yunnan         100.3397       25.5000          138       121     2012      09        28        272              0.000000      19.376984      46.428444       0.325059   -9999.000000   -9999.000000   -9999.000000   -9999.000000
56752     56752     yunnan         100.3397       25.5000          138       121     2012      09        29        273              0.000000      19.227753      20.416893       0.363492   -9999.000000   -9999.000000       0.083300       0.927000
56752     56752     yunnan         100.3397       25.5000          138       121     2012      09        30        274              0.000000      18.235321       0.271232       0.371303       0.173000   -9999.000000       0.088000       0.847000
56752     56752     yunnan         100.3397       25.5000          138       121     2012      10        01        275              0.000000      19.631531       0.123674       0.344039       0.309000   -9999.000000       0.064700       0.512000
56752     56752     yunnan         100.3397       25.5000          138       121     2012      10        02        276              0.000000      19.391418       1.613289       0.337388       0.299000       0.039500   -9999.000000       0.798000
56752     56752     yunnan         100.3397       25.5000          138       121     2012      10        03        277              0.000000      19.348328       0.620901       0.335588   -9999.000000   -9999.000000   -9999.000000   -9999.000000
56752     56752     yunnan         100.3397       25.5000          138       121     2012      10        04        278              0.000000      18.500702       0.671527       0.332515   -9999.000000       0.213400   -9999.000000       0.607000
56752     56752     yunnan         100.3397       25.5000          138       121     2012      10        05        279              0.000000      18.291107       2.300861       0.331251   -9999.000000   -9999.000000       0.074700   -9999.000000
56752     56752     yunnan         100.3397       25.5000          138       121     2012      10        06        280              0.000000      18.508728       8.926372       0.332022   -9999.000000   -9999.000000       0.073500       0.622000
56752     56752     yunnan         100.3397       25.5000          138       121     2012      10        07        281              0.000000      18.922729       1.886219       0.342117       0.282000       0.174500       0.067000       0.770000
56752     56752     yunnan         100.3397       25.5000          138       121     2012      10        08        282              0.000000      18.531342       1.842256       0.340124       0.291000   -9999.000000   -9999.000000   -9999.000000
56752     56752     yunnan         100.3397       25.5000          138       121     2012      10        09        283              0.000000      18.528748      12.258071       0.335520   -9999.000000   -9999.000000   -9999.000000       0.539000
56752     56752     yunnan         100.3397       25.5000          138       121     2012      10        10        284              0.000000      18.751434       1.558496       0.340593   -9999.000000   -9999.000000       0.097900   -9999.000000
56752     56752     yunnan         100.3397       25.5000          138       121     2012      10        11        285              0.000000      17.943268       1.956828       0.343745   -9999.000000   -9999.000000       0.095700       0.625000
56752     56752     yunnan         100.3397       25.5000          138       121     2012      10        12        286              0.000000      17.228668      15.044676       0.336778       0.313000       0.136300       0.095400       0.977000
56752     56752     yunnan         100.3397       25.5000          138       121     2012      10        13        287              0.000000      16.414795       2.145247       0.355613       0.256000   -9999.000000   -9999.000000       0.659000
56752     56752     yunnan         100.3397       25.5000          138       121     2012      10        14        288              0.000000      17.558258       1.772876       0.342177   -9999.000000   -9999.000000   -9999.000000       0.504000
56752     56752     yunnan         100.3397       25.5000          138       121     2012      10        15        289              0.000000      18.001617       1.292941       0.333486   -9999.000000       0.115100   -9999.000000   -9999.000000
56752     56752     yunnan         100.3397       25.5000          138       121     2012      10        16        290              0.000000      17.974243       0.487133       0.330053       0.220000   -9999.000000       0.102100       0.321000
56752     56752     yunnan         100.3397       25.5000          138       121     2012      10        17        291              0.000000      17.896210       0.000000       0.326669       0.191000       0.104400       0.107900       0.449000
56752     56752     yunnan         100.3397       25.5000          138       121     2012      10        18        292              0.000000      17.092987       0.000000       0.324413       0.240000   -9999.000000       0.102800       0.428000
56752     56752     yunnan         100.3397       25.5000          138       121     2012      10        19        293              0.000000      16.387054       0.132875       0.322933       0.217000   -9999.000000   -9999.000000       0.477000
56752     56752     yunnan         100.3397       25.5000          138       121     2012      10        20        294              0.000000      16.666412       0.564136       0.321449   -9999.000000       0.009000   -9999.000000   -9999.000000
56752     56752     yunnan         100.3397       25.5000          138       121     2012      10        21        295              0.000000      16.546967       0.639555       0.320391   -9999.000000   -9999.000000   -9999.000000       0.306000
56752     56752     yunnan         100.3397       25.5000          138       121     2012      10        22        296              0.000000      16.351868       0.289502       0.319254   -9999.000000       0.138300       0.141400   -9999.000000
56752     56752     yunnan         100.3397       25.5000          138       121     2012      10        23        297              0.000000      16.184143       0.340602       0.318492   -9999.000000   -9999.000000       0.141200       0.232000
56752     56752     yunnan         100.3397       25.5000          138       121     2012      10        24        298              0.000000      16.081696       1.212772       0.317489   -9999.000000   -9999.000000   -9999.000000       0.548000
56752     56752     yunnan         100.3397       25.5000          138       121     2012      10        25        299              0.000000      16.139526       0.756682       0.316104   -9999.000000       0.104500   -9999.000000   -9999.000000
56752     56752     yunnan         100.3397       25.5000          138       121     2012      10        26        300              0.000000      16.070282       1.146666       0.314634   -9999.000000   -9999.000000   -9999.000000       0.262000
56752     56752     yunnan         100.3397       25.5000          138       121     2012      10        27        301              0.000000      15.906708       0.924897       0.313722       0.420000       0.118600       0.131800   -9999.000000
56752     56752     yunnan         100.3397       25.5000          138       121     2012      10        28        302              0.000000      15.975067       0.116416       0.313394       0.463000       0.056800       0.144900       0.357000
56752     56752     yunnan         100.3397       25.5000          138       121     2012      10        29        303              0.000000      16.278961       3.135375       0.312485       0.449000   -9999.000000       0.128100       0.567000
56752     56752     yunnan         100.3397       25.5000          138       121     2012      10        30        304              0.000000      16.669220       1.590732       0.311625   -9999.000000       0.059200   -9999.000000       0.407000
56752     56752     yunnan         100.3397       25.5000          138       121     2012      10        31        305              0.272067      16.073700       0.541529       0.311896   -9999.000000   -9999.000000   -9999.000000       0.367000
56752     56752     yunnan         100.3397       25.5000          138       121     2012      11        01        306              0.266625      15.401917       0.918215       0.311640   -9999.000000       0.058900   -9999.000000   -9999.000000
56752     56752     yunnan         100.3397       25.5000          138       121     2012      11        02        307              0.260917      14.964386       0.257603       0.309242       0.338000   -9999.000000       0.131600       0.218000
56752     56752     yunnan         100.3397       25.5000          138       121     2012      11        03        308              0.257708      14.400085       0.553497       0.306653       0.402000   -9999.000000       0.136200   -9999.000000
56752     56752     yunnan         100.3397       25.5000          138       121     2012      11        04        309              0.252000      14.486969       0.335245       0.305960       0.416000   -9999.000000       0.126200       0.343000
56752     56752     yunnan         100.3397       25.5000          138       121     2012      11        05        310              0.245958      14.878418       1.039053       0.304808   -9999.000000   -9999.000000   -9999.000000       0.345000
56752     56752     yunnan         100.3397       25.5000          138       121     2012      11        06        311              0.241583      15.200867       4.706929       0.306111   -9999.000000   -9999.000000   -9999.000000   -9999.000000
56752     56752     yunnan         100.3397       25.5000          138       121     2012      11        07        312              0.239417      14.252594       4.905963       0.313939   -9999.000000       0.274600       0.099300       0.528000
56752     56752     yunnan         100.3397       25.5000          138       121     2012      11        08        313              0.236458      14.241302       0.576451       0.328909       0.411000   -9999.000000       0.102200   -9999.000000
56752     56752     yunnan         100.3397       25.5000          138       121     2012      11        09        314              0.232917      14.251740       1.103548       0.316097       0.428000       0.284600       0.101900       0.218000
56752     56752     yunnan         100.3397       25.5000          138       121     2012      11        10        315              0.230833      13.848602       2.056739       0.311566   -9999.000000       0.025600   -9999.000000       0.336000
56752     56752     yunnan         100.3397       25.5000          138       121     2012      11        11        316              0.228417      13.602356       0.000000       0.308384   -9999.000000   -9999.000000   -9999.000000       0.235000
56752     56752     yunnan         100.3397       25.5000          138       121     2012      11        12        317              0.226167      13.487213       1.172674       0.306131   -9999.000000       0.104400   -9999.000000       0.435000
56752     56752     yunnan         100.3397       25.5000          138       121     2012      11        13        318              0.000000      14.007904       0.391983       0.303869       0.426000   -9999.000000       0.151900   -9999.000000
56752     56752     yunnan         100.3397       25.5000          138       121     2012      11        14        319              0.222208      13.905457       0.886964       0.303790       0.450000   -9999.000000       0.159100       0.233000
56752     56752     yunnan         100.3397       25.5000          138       121     2012      11        15        320              0.219125      13.177002       0.386582       0.305629       0.454000       0.069200       0.143600       0.242000
56752     56752     yunnan         100.3397       25.5000          138       121     2012      11        16        321              0.215083      14.303528       0.038239       0.303219   -9999.000000   -9999.000000   -9999.000000       0.117000
56752     56752     yunnan         100.3397       25.5000          138       121     2012      11        17        322              0.000000      13.450928       0.327579       0.301241   -9999.000000   -9999.000000   -9999.000000       0.248000
56752     56752     yunnan         100.3397       25.5000          138       121     2012      11        18        323              0.213125      13.352753       0.000000       0.300395   -9999.000000   -9999.000000   -9999.000000   -9999.000000
56752     56752     yunnan         100.3397       25.5000          138       121     2012      11        19        324              0.210792      13.242004       0.000000       0.298832       0.434000   -9999.000000       0.135800       0.228000
56752     56752     yunnan         100.3397       25.5000          138       121     2012      11        20        325              0.211250      13.835602       0.624360       0.297142       0.461000       0.025500       0.151600   -9999.000000
56752     56752     yunnan         100.3397       25.5000          138       121     2012      11        21        326              0.210333      13.711182      11.074787       0.297086   -9999.000000   -9999.000000       0.130600       0.106000
56752     56752     yunnan         100.3397       25.5000          138       121     2012      11        22        327              0.207667      13.847626       0.000000       0.295817   -9999.000000   -9999.000000   -9999.000000       0.363000
56752     56752     yunnan         100.3397       25.5000          138       121     2012      11        23        328              0.204875      13.683075       0.000000       0.294306   -9999.000000   -9999.000000   -9999.000000   -9999.000000
56752     56752     yunnan         100.3397       25.5000          138       121     2012      11        24        329              0.203750      13.474701       0.089700       0.293520       0.465000   -9999.000000       0.143600       0.066000
56752     56752     yunnan         100.3397       25.5000          138       121     2012      11        25        330              0.202375      13.168976       4.694393       0.292446       0.461000   -9999.000000       0.133100   -9999.000000
56752     56752     yunnan         100.3397       25.5000          138       121     2012      11        26        331              0.202375      12.514130       0.596369       0.291700   -9999.000000   -9999.000000       0.163400       0.250000
56752     56752     yunnan         100.3397       25.5000          138       121     2012      11        27        332              0.200250      12.230194       0.000000       0.292302   -9999.000000       0.057000   -9999.000000       0.391000
56752     56752     yunnan         100.3397       25.5000          138       121     2012      11        28        333              0.199667      11.916016       0.000000       0.293237   -9999.000000   -9999.000000   -9999.000000       0.253000
56752     56752     yunnan         100.3397       25.5000          138       121     2012      11        29        334              0.200250      12.289032       0.119308       0.292089   -9999.000000   -9999.000000   -9999.000000       0.476000
56752     56752     yunnan         100.3397       25.5000          138       121     2012      11        30        335              0.199583      11.960541       0.699224       0.291128       0.461000       0.039400       0.168500   -9999.000000
56752     56752     yunnan         100.3397       25.5000          138       121     2012      12        01        336              0.199750      11.806763       3.071642       0.290756       0.454000   -9999.000000       0.176000       0.166000
56752     56752     yunnan         100.3397       25.5000          138       121     2012      12        02        337              0.202167      11.771576       0.532713       0.290971   -9999.000000   -9999.000000       0.166200   -9999.000000
56752     56752     yunnan         100.3397       25.5000          138       121     2012      12        03        338              0.200500      11.489624       0.000000       0.290144   -9999.000000   -9999.000000   -9999.000000       0.243000
56752     56752     yunnan         100.3397       25.5000          138       121     2012      12        04        339              0.199417      11.298187       2.327674       0.289380   -9999.000000   -9999.000000   -9999.000000       0.181000
56752     56752     yunnan         100.3397       25.5000          138       121     2012      12        05        340              0.198000      11.242645       0.504501       0.291765       0.447000       0.040700   -9999.000000   -9999.000000
56752     56752     yunnan         100.3397       25.5000          138       121     2012      12        06        341              0.196500      11.158813       0.000000       0.292059       0.454000   -9999.000000       0.141100       0.103000
56752     56752     yunnan         100.3397       25.5000          138       121     2012      12        07        342              0.196917      11.318268       4.432604       0.291802   -9999.000000       0.037700       0.141800   -9999.000000
56752     56752     yunnan         100.3397       25.5000          138       121     2012      12        08        343              0.195750      10.924408       0.177781       0.295473   -9999.000000   -9999.000000   -9999.000000       0.093000
56752     56752     yunnan         100.3397       25.5000          138       121     2012      12        09        344              0.197667      10.686707       1.818882       0.295628   -9999.000000   -9999.000000   -9999.000000       0.143000
56752     56752     yunnan         100.3397       25.5000          138       121     2012      12        10        345              0.197333      11.153534       0.300596       0.294643   -9999.000000   -9999.000000   -9999.000000       0.182000
56752     56752     yunnan         100.3397       25.5000          138       121     2012      12        11        346              0.195708      11.213409       3.494707       0.293912       0.354000   -9999.000000       0.150800       0.164000
56752     56752     yunnan         100.3397       25.5000          138       121     2012      12        12        347              0.196833      10.582855       0.897642       0.293634       0.312000   -9999.000000       0.144500   -9999.000000
56752     56752     yunnan         100.3397       25.5000          138       121     2012      12        13        348              0.196500      10.767731       0.723610       0.294415   -9999.000000       0.089500       0.143600       0.287000
56752     56752     yunnan         100.3397       25.5000          138       121     2012      12        14        349              0.197458      10.599976       1.736413       0.294482   -9999.000000   -9999.000000   -9999.000000       0.116000
56752     56752     yunnan         100.3397       25.5000          138       121     2012      12        15        350              0.000000      10.262390       0.206880       0.294750   -9999.000000       0.067200   -9999.000000       0.074000
56752     56752     yunnan         100.3397       25.5000          138       121     2012      12        16        351              0.201458      10.093323       0.403497       0.293318       0.360000   -9999.000000   -9999.000000       0.099000
56752     56752     yunnan         100.3397       25.5000          138       121     2012      12        17        352              0.203208      10.328369       0.085633       0.292750       0.342000   -9999.000000       0.141700   -9999.000000
56752     56752     yunnan         100.3397       25.5000          138       121     2012      12        18        353              0.200792      10.502045       2.777894       0.291548   -9999.000000       0.033400       0.159400       0.073000
56752     56752     yunnan         100.3397       25.5000          138       121     2012      12        19        354              0.201708      10.453674       0.216689       0.295031   -9999.000000   -9999.000000       0.141000   -9999.000000
56752     56752     yunnan         100.3397       25.5000          138       121     2012      12        20        355              0.000000      10.743164       0.777311       0.292566   -9999.000000   -9999.000000   -9999.000000       0.070000
56752     56752     yunnan         100.3397       25.5000          138       121     2012      12        21        356              0.201625      10.653107       0.597076       0.292261       0.439000   -9999.000000   -9999.000000       0.150000
56752     56752     yunnan         100.3397       25.5000          138       121     2012      12        22        357              0.202708      10.127136       0.895754       0.290731       0.415000   -9999.000000       0.153600   -9999.000000
56752     56752     yunnan         100.3397       25.5000          138       121     2012      12        23        358              0.203792       9.705536       0.000000       0.290153   -9999.000000       0.027600       0.157300       0.107000
56752     56752     yunnan         100.3397       25.5000          138       121     2012      12        24        359              0.199200       9.460175       0.000000       0.289961   -9999.000000   -9999.000000       0.160800   -9999.000000
56752     56752     yunnan         100.3397       25.5000          138       121     2012      12        25        360              0.203208       9.439545       0.000000       0.289710   -9999.000000   -9999.000000   -9999.000000       0.023000
56752     56752     yunnan         100.3397       25.5000          138       121     2012      12        26        361              0.000000       9.458282       0.058175       0.288622   -9999.000000   -9999.000000   -9999.000000       0.202000
56752     56752     yunnan         100.3397       25.5000          138       121     2012      12        27        362              0.208083       8.420715       0.295331       0.288350       0.426000   -9999.000000   -9999.000000       0.144000
56752     56752     yunnan         100.3397       25.5000          138       121     2012      12        28        363              0.000000       8.360321       0.000000       0.288251       0.429000   -9999.000000       0.145100       0.439000
56752     56752     yunnan         100.3397       25.5000          138       121     2012      12        29        364              0.000000       8.752380      10.364026       0.287741   -9999.000000   -9999.000000       0.153600   -9999.000000
56752     56752     yunnan         100.3397       25.5000          138       121     2012      12        30        365              0.000000       9.511841       0.699150       0.287160   -9999.000000   -9999.000000       0.142300       0.013000
56752     56752     yunnan         100.3397       25.5000          138       121     2012      12        31        366              0.195667       9.339020       1.599064       0.287555       0.404000   -9999.000000   -9999.000000   -9999.000000
