# Supplementary material for: Research on Fusing Multisatellite Soil Moisture Data Based on Bayesian Model Averaging
Source: Hindawi journal article supplement (doi:10.1155/2018/9310838), 2018-06-25
Supplement: f1 [file 9310838.f1.zip › 2012_sm00-10cm_daily_ZDB_ZHY_56778_366days_allin.txt]

56778     56778     yunnan         102.6500       25.0000          140       131     2012      01        01        001              0.000000   -9999.000000       0.000000   -9999.000000   -9999.000000       0.092000   -9999.000000   -9999.000000
56778     56778     yunnan         102.6500       25.0000          140       131     2012      01        02        002              0.282250      10.887451       0.179346       0.273349   -9999.000000   -9999.000000   -9999.000000   -9999.000000
56778     56778     yunnan         102.6500       25.0000          140       131     2012      01        03        003              0.000000      13.418030       0.573213       0.272490       0.390000   -9999.000000       0.194300       0.747000
56778     56778     yunnan         102.6500       25.0000          140       131     2012      01        04        004              0.294350      13.074921      16.365656       0.273971   -9999.000000       0.145200       0.156500   -9999.000000
56778     56778     yunnan         102.6500       25.0000          140       131     2012      01        05        005              0.294522       7.699738       0.118600       0.322611   -9999.000000   -9999.000000       0.172600       1.000000
56778     56778     yunnan         102.6500       25.0000          140       131     2012      01        06        006              0.291792       9.327881       0.000000       0.307170   -9999.000000   -9999.000000   -9999.000000       0.375000
56778     56778     yunnan         102.6500       25.0000          140       131     2012      01        07        007              0.289909       9.742828       0.000000       0.297458   -9999.000000       0.070600   -9999.000000   -9999.000000
56778     56778     yunnan         102.6500       25.0000          140       131     2012      01        08        008              0.000000       9.902710       0.040578       0.293066   -9999.000000   -9999.000000       0.130200       0.223000
56778     56778     yunnan         102.6500       25.0000          140       131     2012      01        09        009              0.287435      10.316864       0.000000       0.289940       0.332000       0.122700       0.147900   -9999.000000
56778     56778     yunnan         102.6500       25.0000          140       131     2012      01        10        010              0.286826      11.346588       0.000000       0.287406       0.329000   -9999.000000   -9999.000000       0.582000
56778     56778     yunnan         102.6500       25.0000          140       131     2012      01        11        011              0.286348      11.084778       0.000000       0.286447       0.333000       0.022800   -9999.000000       0.294000
56778     56778     yunnan         102.6500       25.0000          140       131     2012      01        12        012              0.286000      11.820953       0.127189       0.285034   -9999.000000       0.054700   -9999.000000       0.187000
56778     56778     yunnan         102.6500       25.0000          140       131     2012      01        13        013              0.286000      11.305817       7.360331       0.284106   -9999.000000   -9999.000000   -9999.000000       0.819000
56778     56778     yunnan         102.6500       25.0000          140       131     2012      01        14        014              0.286000       9.537628       0.077789       0.308403       0.316000       0.027900       0.149900   -9999.000000
56778     56778     yunnan         102.6500       25.0000          140       131     2012      01        15        015              0.285208      10.494873       0.000000       0.298356       0.284000   -9999.000000       0.144800       0.338000
56778     56778     yunnan         102.6500       25.0000          140       131     2012      01        16        016              0.284542       9.275055       0.101496       0.291348       0.285000       0.022300       0.158600       0.210000
56778     56778     yunnan         102.6500       25.0000          140       131     2012      01        17        017              0.000000       9.261627       0.118127       0.287912   -9999.000000       0.048100   -9999.000000       0.292000
56778     56778     yunnan         102.6500       25.0000          140       131     2012      01        18        018              0.284000       9.371796       0.000000       0.286309   -9999.000000   -9999.000000   -9999.000000       0.389000
56778     56778     yunnan         102.6500       25.0000          140       131     2012      01        19        019              0.284000      10.403687       0.000000       0.283467       0.324000   -9999.000000   -9999.000000   -9999.000000
56778     56778     yunnan         102.6500       25.0000          140       131     2012      01        20        020              0.283750      10.704254       0.000000       0.281362       0.325000   -9999.000000       0.162900       0.667000
56778     56778     yunnan         102.6500       25.0000          140       131     2012      01        21        021              0.283375      11.048981       0.787975       0.279457       0.357000   -9999.000000       0.173400   -9999.000000
56778     56778     yunnan         102.6500       25.0000          140       131     2012      01        22        022              0.283083      10.765259       0.000000       0.277770       0.354000       0.079100       0.185500       0.427000
56778     56778     yunnan         102.6500       25.0000          140       131     2012      01        23        023              0.283000      10.103119       1.370262       0.276276   -9999.000000   -9999.000000   -9999.000000       0.477000
56778     56778     yunnan         102.6500       25.0000          140       131     2012      01        24        024              0.283000      10.795990       3.248229       0.275167   -9999.000000       0.022600   -9999.000000   -9999.000000
56778     56778     yunnan         102.6500       25.0000          140       131     2012      01        25        025              0.283000      10.287262       0.000000       0.273491       0.375500   -9999.000000       0.139400       0.122000
56778     56778     yunnan         102.6500       25.0000          140       131     2012      01        26        026              0.283000      10.069244       0.000000       0.273557       0.347000   -9999.000000       0.149800   -9999.000000
56778     56778     yunnan         102.6500       25.0000          140       131     2012      01        27        027              0.283000      11.534607       0.000000       0.271065       0.388000       0.042500       0.144000       0.794000
56778     56778     yunnan         102.6500       25.0000          140       131     2012      01        28        028              0.282625      12.269684       0.000000       0.268931   -9999.000000   -9999.000000   -9999.000000       0.239000
56778     56778     yunnan         102.6500       25.0000          140       131     2012      01        29        029              0.282417      12.068817       0.000000       0.266965   -9999.000000   -9999.000000   -9999.000000       0.130000
56778     56778     yunnan         102.6500       25.0000          140       131     2012      01        30        030              0.282333      12.140015       0.000000       0.265614       0.336000       0.043800   -9999.000000       0.519000
56778     56778     yunnan         102.6500       25.0000          140       131     2012      01        31        031              0.282278      12.331451       0.962941       0.263676       0.349000   -9999.000000       0.166800   -9999.000000
56778     56778     yunnan         102.6500       25.0000          140       131     2012      02        01        032              0.282190      12.564148       7.961822       0.262715       0.281000       0.021400       0.171900       0.745000
56778     56778     yunnan         102.6500       25.0000          140       131     2012      02        02        033              0.282000      12.500336       1.228737       0.260702   -9999.000000   -9999.000000       0.173600   -9999.000000
56778     56778     yunnan         102.6500       25.0000          140       131     2012      02        03        034              0.282000      12.140961       0.353882       0.259269   -9999.000000   -9999.000000   -9999.000000       0.280000
56778     56778     yunnan         102.6500       25.0000          140       131     2012      02        04        035              0.282000      12.781799       0.000000       0.257877       0.273000       0.018200   -9999.000000       0.235000
56778     56778     yunnan         102.6500       25.0000          140       131     2012      02        05        036              0.282000      13.299988       0.000000       0.255195       0.300500   -9999.000000   -9999.000000   -9999.000000
56778     56778     yunnan         102.6500       25.0000          140       131     2012      02        06        037              0.282000      14.265289       0.079823       0.252036       0.268000   -9999.000000       0.150000       0.702000
56778     56778     yunnan         102.6500       25.0000          140       131     2012      02        07        038              0.282000      13.734497       0.066691       0.248758   -9999.000000   -9999.000000       0.149700   -9999.000000
56778     56778     yunnan         102.6500       25.0000          140       131     2012      02        08        039              0.282000      13.105560       0.084413       0.249201   -9999.000000   -9999.000000   -9999.000000       0.057000
56778     56778     yunnan         102.6500       25.0000          140       131     2012      02        09        040              0.282000      14.919342       0.047994       0.246195       0.310000       0.047900   -9999.000000       0.157000
56778     56778     yunnan         102.6500       25.0000          140       131     2012      02        10        041              0.282000      15.069946       0.574384       0.242269       0.336000   -9999.000000   -9999.000000       0.419000
56778     56778     yunnan         102.6500       25.0000          140       131     2012      02        11        042              0.282000      14.617462       0.000000       0.240524   -9999.000000   -9999.000000       0.142000       0.102000
56778     56778     yunnan         102.6500       25.0000          140       131     2012      02        12        043              0.281667      14.490692       0.566292       0.239552   -9999.000000   -9999.000000       0.149300   -9999.000000
56778     56778     yunnan         102.6500       25.0000          140       131     2012      02        13        044              0.281500      14.468170       0.178007       0.237423   -9999.000000   -9999.000000       0.152600       0.074000
56778     56778     yunnan         102.6500       25.0000          140       131     2012      02        14        045              0.281500      14.496735       0.128993       0.236585   -9999.000000       0.115100   -9999.000000       0.509000
56778     56778     yunnan         102.6500       25.0000          140       131     2012      02        15        046              0.281375      14.905731       0.730728       0.233985       0.286500   -9999.000000   -9999.000000       0.447000
56778     56778     yunnan         102.6500       25.0000          140       131     2012      02        16        047              0.281348      15.212982       0.245260       0.231189       0.282000   -9999.000000   -9999.000000       0.360000
56778     56778     yunnan         102.6500       25.0000          140       131     2012      02        17        048              0.281292      15.859039       0.176556       0.228166       0.313500       0.101500       0.155800   -9999.000000
56778     56778     yunnan         102.6500       25.0000          140       131     2012      02        18        049              0.281250      16.398865       0.093850       0.225804   -9999.000000   -9999.000000       0.147300       0.514000
56778     56778     yunnan         102.6500       25.0000          140       131     2012      02        19        050              0.281292      14.917999       0.155352       0.225114   -9999.000000       0.021100       0.146300   -9999.000000
56778     56778     yunnan         102.6500       25.0000          140       131     2012      02        20        051              0.281250      14.341675       0.089881       0.224709       0.288500   -9999.000000   -9999.000000       0.011000
56778     56778     yunnan         102.6500       25.0000          140       131     2012      02        21        052              0.281304      15.172211       0.000000       0.223364       0.290500       0.032900   -9999.000000       0.414000
56778     56778     yunnan         102.6500       25.0000          140       131     2012      02        22        053              0.281211      15.022766       0.000000       0.222569       0.268000       0.017000   -9999.000000   -9999.000000
56778     56778     yunnan         102.6500       25.0000          140       131     2012      02        23        054              0.281217      15.723724       0.094716       0.219769   -9999.000000   -9999.000000       0.151200       0.665000
56778     56778     yunnan         102.6500       25.0000          140       131     2012      02        24        055              0.281895      16.346863       0.000000       0.216349   -9999.000000       0.029400       0.148700   -9999.000000
56778     56778     yunnan         102.6500       25.0000          140       131     2012      02        25        056              0.282000      16.770233       0.089195       0.212832       0.296000   -9999.000000   -9999.000000       0.293000
56778     56778     yunnan         102.6500       25.0000          140       131     2012      02        26        057              0.282000      17.091156       0.416886       0.207076       0.293500   -9999.000000   -9999.000000       0.319000
56778     56778     yunnan         102.6500       25.0000          140       131     2012      02        27        058              0.282000      16.117737       0.082975       0.203733       0.256000       0.039600   -9999.000000       0.169000
56778     56778     yunnan         102.6500       25.0000          140       131     2012      02        28        059              0.282000      13.998810       0.395179       0.204648   -9999.000000   -9999.000000   -9999.000000       0.363000
56778     56778     yunnan         102.6500       25.0000          140       131     2012      02        29        060              0.000000   -9999.000000       1.035920   -9999.000000   -9999.000000   -9999.000000   -9999.000000   -9999.000000
56778     56778     yunnan         102.6500       25.0000          140       131     2012      03        01        061              0.282000      16.254944       1.920368       0.201438       0.301000   -9999.000000       0.132300       0.681000
56778     56778     yunnan         102.6500       25.0000          140       131     2012      03        02        062              0.282000      12.571899      17.706905       0.221831       0.297000   -9999.000000   -9999.000000   -9999.000000
56778     56778     yunnan         102.6500       25.0000          140       131     2012      03        03        063              0.282045      11.538544      50.686840       0.281669   -9999.000000       0.172600   -9999.000000       1.000000
56778     56778     yunnan         102.6500       25.0000          140       131     2012      03        04        064              0.283000       9.379272       1.048623       0.365943   -9999.000000   -9999.000000   -9999.000000       0.766000
56778     56778     yunnan         102.6500       25.0000          140       131     2012      03        05        065              0.283227      11.175537       0.132052       0.326116   -9999.000000       0.061500       0.141500   -9999.000000
56778     56778     yunnan         102.6500       25.0000          140       131     2012      03        06        066              0.283350      13.045105       0.201483       0.309927   -9999.000000       0.039800       0.131000       0.752000
56778     56778     yunnan         102.6500       25.0000          140       131     2012      03        07        067              0.000000      13.396271       2.603432       0.301648       0.272000   -9999.000000       0.129900   -9999.000000
56778     56778     yunnan         102.6500       25.0000          140       131     2012      03        08        068              0.283333      13.647675       0.248208       0.295912       0.287500       0.062700   -9999.000000       0.119000
56778     56778     yunnan         102.6500       25.0000          140       131     2012      03        09        069              0.283348      13.433777       0.108544       0.291721       0.248000   -9999.000000   -9999.000000       0.261000
56778     56778     yunnan         102.6500       25.0000          140       131     2012      03        10        070              0.283273      15.245728       0.211420       0.285296   -9999.000000   -9999.000000       0.124300       0.404000
56778     56778     yunnan         102.6500       25.0000          140       131     2012      03        11        071              0.283300      15.737122       0.312378       0.280394   -9999.000000       0.089500       0.138800       0.256000
56778     56778     yunnan         102.6500       25.0000          140       131     2012      03        12        072              0.283211      16.772705       0.197231       0.275521       0.222500   -9999.000000       0.136900   -9999.000000
56778     56778     yunnan         102.6500       25.0000          140       131     2012      03        13        073              0.283400      16.885345       0.092081       0.271045       0.248500       0.039400   -9999.000000       0.191000
56778     56778     yunnan         102.6500       25.0000          140       131     2012      03        14        074              0.283261      17.682373       0.000000       0.266365       0.252500   -9999.000000   -9999.000000       0.296000
56778     56778     yunnan         102.6500       25.0000          140       131     2012      03        15        075              0.283227      17.319580       0.172942       0.262016   -9999.000000   -9999.000000   -9999.000000       0.149000
56778     56778     yunnan         102.6500       25.0000          140       131     2012      03        16        076              0.283130      17.685333       0.178288       0.257732   -9999.000000       0.027200       0.120600       0.404000
56778     56778     yunnan         102.6500       25.0000          140       131     2012      03        17        077              0.283000      17.305450       0.036839       0.253890       0.246000   -9999.000000       0.130000   -9999.000000
56778     56778     yunnan         102.6500       25.0000          140       131     2012      03        18        078              0.283083      16.016510       0.056638       0.251103       0.239000       0.025500       0.123100       0.679000
56778     56778     yunnan         102.6500       25.0000          140       131     2012      03        19        079              0.283000      16.703400       1.012499       0.247865       0.209000   -9999.000000   -9999.000000   -9999.000000
56778     56778     yunnan         102.6500       25.0000          140       131     2012      03        20        080              0.283000      17.154358       0.000000       0.243963       0.221000   -9999.000000   -9999.000000       0.194000
56778     56778     yunnan         102.6500       25.0000          140       131     2012      03        21        081              0.283000      18.591248       0.192860       0.239352   -9999.000000       0.036800   -9999.000000       0.302000
56778     56778     yunnan         102.6500       25.0000          140       131     2012      03        22        082              0.283000      19.133423       0.870255       0.234956       0.218000   -9999.000000       0.126900   -9999.000000
56778     56778     yunnan         102.6500       25.0000          140       131     2012      03        23        083              0.283000      18.604218       0.172957       0.232691       0.177000   -9999.000000       0.116400       0.427000
56778     56778     yunnan         102.6500       25.0000          140       131     2012      03        24        084              0.283000      14.285736       0.078271       0.234040       0.220500       0.027900       0.120300   -9999.000000
56778     56778     yunnan         102.6500       25.0000          140       131     2012      03        25        085              0.000000      15.580719       0.090854       0.233791       0.222000   -9999.000000   -9999.000000       0.054000
56778     56778     yunnan         102.6500       25.0000          140       131     2012      03        26        086              0.283000      17.894379       0.109698       0.232553   -9999.000000   -9999.000000   -9999.000000       0.037000
56778     56778     yunnan         102.6500       25.0000          140       131     2012      03        27        087              0.283000      18.469635       2.124530       0.230212   -9999.000000   -9999.000000       0.111900       0.386000
56778     56778     yunnan         102.6500       25.0000          140       131     2012      03        28        088              0.283000      18.432068       0.184568       0.237679       0.196500   -9999.000000       0.099600       0.613000
56778     56778     yunnan         102.6500       25.0000          140       131     2012      03        29        089              0.283000      20.023224       0.289220       0.233343       0.217500       0.043800       0.096500   -9999.000000
56778     56778     yunnan         102.6500       25.0000          140       131     2012      03        30        090              0.283000      20.356781       0.162421       0.223023       0.218500   -9999.000000   -9999.000000       0.740000
56778     56778     yunnan         102.6500       25.0000          140       131     2012      03        31        091              0.283000      19.116791       0.099131       0.214924   -9999.000000   -9999.000000   -9999.000000   -9999.000000
56778     56778     yunnan         102.6500       25.0000          140       131     2012      04        01        092              0.283000      14.804443       0.000000       0.216560   -9999.000000   -9999.000000   -9999.000000       0.005000
56778     56778     yunnan         102.6500       25.0000          140       131     2012      04        02        093              0.283000      18.814758       0.000000       0.213401       0.192000       0.024000       0.097100       0.198000
56778     56778     yunnan         102.6500       25.0000          140       131     2012      04        03        094              0.283000      20.884399       0.147092       0.205623       0.221500       0.031800       0.093600   -9999.000000
56778     56778     yunnan         102.6500       25.0000          140       131     2012      04        04        095              0.283000      19.739532       0.099643       0.202692       0.217000   -9999.000000       0.098600       0.414000
56778     56778     yunnan         102.6500       25.0000          140       131     2012      04        05        096              0.283000      20.538849       0.352214       0.196571   -9999.000000   -9999.000000   -9999.000000   -9999.000000
56778     56778     yunnan         102.6500       25.0000          140       131     2012      04        06        097              0.283000      21.110962       0.645037       0.190139   -9999.000000   -9999.000000   -9999.000000       0.345000
56778     56778     yunnan         102.6500       25.0000          140       131     2012      04        07        098              0.283000      20.579529       4.539436       0.190153       0.265000   -9999.000000   -9999.000000       0.292000
56778     56778     yunnan         102.6500       25.0000          140       131     2012      04        08        099              0.283000      17.696838      15.643821       0.223941       0.325000       0.085400       0.124800       0.440000
56778     56778     yunnan         102.6500       25.0000          140       131     2012      04        09        100              0.283000      14.251465       0.069621       0.299022       0.246500   -9999.000000       0.117600       0.673000
56778     56778     yunnan         102.6500       25.0000          140       131     2012      04        10        101              0.283000      17.256989       0.089401       0.270653       0.203000       0.021300       0.111200   -9999.000000
56778     56778     yunnan         102.6500       25.0000          140       131     2012      04        11        102              0.283000      18.430298       0.762368       0.256537   -9999.000000   -9999.000000   -9999.000000       0.328000
56778     56778     yunnan         102.6500       25.0000          140       131     2012      04        12        103              0.283000      19.483887       0.122496       0.245164   -9999.000000   -9999.000000   -9999.000000       0.129000
56778     56778     yunnan         102.6500       25.0000          140       131     2012      04        13        104              0.283000      18.818848       0.415389       0.238793       0.194000       0.021300       0.104900       0.110000
56778     56778     yunnan         102.6500       25.0000          140       131     2012      04        14        105              0.283042      19.590454       0.018254       0.231689       0.202500   -9999.000000       0.113200       0.249000
56778     56778     yunnan         102.6500       25.0000          140       131     2012      04        15        106              0.283000      21.082520       0.159300       0.219627       0.205500       0.073100       0.108900   -9999.000000
56778     56778     yunnan         102.6500       25.0000          140       131     2012      04        16        107              0.283000      21.385986       0.000000       0.209987   -9999.000000   -9999.000000   -9999.000000       0.453000
56778     56778     yunnan         102.6500       25.0000          140       131     2012      04        17        108              0.283000      21.528412       0.000000       0.202262   -9999.000000   -9999.000000   -9999.000000   -9999.000000
56778     56778     yunnan         102.6500       25.0000          140       131     2012      04        18        109              0.283000      21.473663       1.857056       0.193736       0.186500   -9999.000000   -9999.000000       0.251000
56778     56778     yunnan         102.6500       25.0000          140       131     2012      04        19        110              0.283000      21.996918       2.291234       0.187848       0.200000   -9999.000000       0.120900       0.314000
56778     56778     yunnan         102.6500       25.0000          140       131     2012      04        20        111              0.283000      19.729065       0.488521       0.207536       0.221500       0.059200       0.116600   -9999.000000
56778     56778     yunnan         102.6500       25.0000          140       131     2012      04        21        112              0.283000      19.959564       0.308598       0.211548   -9999.000000       0.020300       0.118400       0.513000
56778     56778     yunnan         102.6500       25.0000          140       131     2012      04        22        113              0.283000      20.683716       1.678259       0.205279   -9999.000000   -9999.000000   -9999.000000   -9999.000000
56778     56778     yunnan         102.6500       25.0000          140       131     2012      04        23        114              0.283000      19.855682       0.661250       0.215100       0.150000       0.080600   -9999.000000       0.148000
56778     56778     yunnan         102.6500       25.0000          140       131     2012      04        24        115              0.283000      21.756073       1.209180       0.207832       0.164500   -9999.000000   -9999.000000       0.498000
56778     56778     yunnan         102.6500       25.0000          140       131     2012      04        25        116              0.000000      22.788544       0.536942       0.194440       0.168500   -9999.000000       0.130200       0.150000
56778     56778     yunnan         102.6500       25.0000          140       131     2012      04        26        117              0.000000      21.554596       1.001806       0.188574   -9999.000000       0.102200       0.128200       0.334000
56778     56778     yunnan         102.6500       25.0000          140       131     2012      04        27        118              0.000000      19.736359       0.661198       0.198174   -9999.000000   -9999.000000       0.127300   -9999.000000
56778     56778     yunnan         102.6500       25.0000          140       131     2012      04        28        119              0.000000      22.180023       0.319792       0.191503       0.160000       0.055400   -9999.000000       0.598000
56778     56778     yunnan         102.6500       25.0000          140       131     2012      04        29        120              0.000000      21.853546       0.868248       0.180598       0.166500       0.048600   -9999.000000   -9999.000000
56778     56778     yunnan         102.6500       25.0000          140       131     2012      04        30        121              0.000000      21.757263       0.492383       0.179642       0.165000   -9999.000000       0.109800       0.298000
56778     56778     yunnan         102.6500       25.0000          140       131     2012      05        01        122              0.000000      22.574890       0.165937       0.175038       0.146000       0.071300       0.117400       0.261000
56778     56778     yunnan         102.6500       25.0000          140       131     2012      05        02        123              0.000000      23.637817       0.000000       0.166597   -9999.000000   -9999.000000       0.119200   -9999.000000
56778     56778     yunnan         102.6500       25.0000          140       131     2012      05        03        124              0.000000      24.321075       0.315749       0.159753   -9999.000000   -9999.000000   -9999.000000       0.341000
56778     56778     yunnan         102.6500       25.0000          140       131     2012      05        04        125              0.000000      24.182220       0.044886       0.155520       0.159000   -9999.000000   -9999.000000   -9999.000000
56778     56778     yunnan         102.6500       25.0000          140       131     2012      05        05        126              0.000000      25.265137       0.000000       0.152803       0.187000   -9999.000000   -9999.000000       0.356000
56778     56778     yunnan         102.6500       25.0000          140       131     2012      05        06        127              0.000000      25.653259       0.537153       0.152594       0.207000       0.093100       0.132800       0.303000
56778     56778     yunnan         102.6500       25.0000          140       131     2012      05        07        128              0.282333      22.380676       3.393915       0.161017   -9999.000000   -9999.000000       0.104700       0.423000
56778     56778     yunnan         102.6500       25.0000          140       131     2012      05        08        129              0.282917      20.519165       3.800269       0.200149   -9999.000000       0.141700       0.108600       0.708000
56778     56778     yunnan         102.6500       25.0000          140       131     2012      05        09        130              0.284208      20.285156       0.162201       0.235956       0.128000       0.253800   -9999.000000   -9999.000000
56778     56778     yunnan         102.6500       25.0000          140       131     2012      05        10        131              0.284125      23.458527       0.422819       0.213479       0.231000   -9999.000000   -9999.000000       0.656000
56778     56778     yunnan         102.6500       25.0000          140       131     2012      05        11        132              0.283917      24.186157       0.000000       0.196669       0.199500       0.095300   -9999.000000       0.604000
56778     56778     yunnan         102.6500       25.0000          140       131     2012      05        12        133              0.283750      25.321228       0.161294       0.181655   -9999.000000   -9999.000000       0.094900       0.348000
56778     56778     yunnan         102.6500       25.0000          140       131     2012      05        13        134              0.283542      26.020020       0.000000       0.169638   -9999.000000   -9999.000000       0.094800       0.410000
56778     56778     yunnan         102.6500       25.0000          140       131     2012      05        14        135              0.283500      25.516815       0.487936       0.161705       0.186500       0.194000   -9999.000000   -9999.000000
56778     56778     yunnan         102.6500       25.0000          140       131     2012      05        15        136              0.283500      24.432312       1.376767       0.160495       0.213000   -9999.000000   -9999.000000       0.823000
56778     56778     yunnan         102.6500       25.0000          140       131     2012      05        16        137              0.283458      22.965302       0.129875       0.170258       0.199000   -9999.000000   -9999.000000   -9999.000000
56778     56778     yunnan         102.6500       25.0000          140       131     2012      05        17        138              0.283458      24.486938       0.558262       0.168522       0.159000       0.086500       0.088000       0.206000
56778     56778     yunnan         102.6500       25.0000          140       131     2012      05        18        139              0.283375      25.099335       1.230505       0.159062   -9999.000000   -9999.000000       0.092600       0.309000
56778     56778     yunnan         102.6500       25.0000          140       131     2012      05        19        140              0.283292      26.279694       1.029483       0.151645       0.197000   -9999.000000       0.089200   -9999.000000
56778     56778     yunnan         102.6500       25.0000          140       131     2012      05        20        141              0.283000      26.450226       0.385880       0.147988       0.164000   -9999.000000   -9999.000000       0.543000
56778     56778     yunnan         102.6500       25.0000          140       131     2012      05        21        142              0.283000      27.312103       0.000000       0.145659       0.177500       0.044800   -9999.000000   -9999.000000
56778     56778     yunnan         102.6500       25.0000          140       131     2012      05        22        143              0.283000      28.202606       2.333418       0.143289       0.164000       0.030600   -9999.000000       1.000000
56778     56778     yunnan         102.6500       25.0000          140       131     2012      05        23        144              0.283000      27.210236       0.000000       0.154955   -9999.000000   -9999.000000       0.074600       0.673000
56778     56778     yunnan         102.6500       25.0000          140       131     2012      05        24        145              0.283000      26.945221      14.653681       0.164631   -9999.000000       0.095000       0.087800       0.476000
56778     56778     yunnan         102.6500       25.0000          140       131     2012      05        25        146              0.000000      26.004089       1.067668       0.216811       0.211500   -9999.000000       0.086100       0.793000
56778     56778     yunnan         102.6500       25.0000          140       131     2012      05        26        147              0.283000      20.270203       1.066635       0.258693       0.207000   -9999.000000   -9999.000000   -9999.000000
56778     56778     yunnan         102.6500       25.0000          140       131     2012      05        27        148              0.283000      21.893158       2.778747       0.235341       0.197500       0.050900   -9999.000000       0.866000
56778     56778     yunnan         102.6500       25.0000          140       131     2012      05        28        149              0.287708      23.496826      13.247765       0.231470   -9999.000000   -9999.000000   -9999.000000   -9999.000000
56778     56778     yunnan         102.6500       25.0000          140       131     2012      05        29        150              0.297292      22.714783       4.952084       0.274164   -9999.000000       0.173300       0.091500   -9999.000000
56778     56778     yunnan         102.6500       25.0000          140       131     2012      05        30        151              0.296000      20.645447       0.673048       0.294362       0.244000   -9999.000000       0.090700   -9999.000000
56778     56778     yunnan         102.6500       25.0000          140       131     2012      05        31        152              0.296000      19.610870       0.714853       0.270861       0.242500   -9999.000000   -9999.000000   -9999.000000
56778     56778     yunnan         102.6500       25.0000          140       131     2012      06        01        153              0.298042      20.233459      33.492569       0.263619       0.262000       0.191900   -9999.000000       1.000000
56778     56778     yunnan         102.6500       25.0000          140       131     2012      06        02        154              0.298375      20.966034       1.030009       0.307108   -9999.000000   -9999.000000   -9999.000000   -9999.000000
56778     56778     yunnan         102.6500       25.0000          140       131     2012      06        03        155              0.297917      19.094177       4.753221       0.316539   -9999.000000       0.124900   -9999.000000       0.758000
56778     56778     yunnan         102.6500       25.0000          140       131     2012      06        04        156              0.299458      20.943970       7.139245       0.309997       0.237000   -9999.000000       0.107700       0.873000
56778     56778     yunnan         102.6500       25.0000          140       131     2012      06        05        157              0.297625      22.223267       1.733057       0.316699       0.199500   -9999.000000       0.093400       0.303000
56778     56778     yunnan         102.6500       25.0000          140       131     2012      06        06        158              0.296583      23.311340       0.000000       0.293274       0.203000       0.081800   -9999.000000       0.398000
56778     56778     yunnan         102.6500       25.0000          140       131     2012      06        07        159              0.295500      24.490265       0.488734       0.280623       0.170000   -9999.000000   -9999.000000   -9999.000000
56778     56778     yunnan         102.6500       25.0000          140       131     2012      06        08        160              0.294792      24.559357      10.922395       0.273882   -9999.000000       0.215700   -9999.000000       0.633000
56778     56778     yunnan         102.6500       25.0000          140       131     2012      06        09        161              0.294167      22.505859       0.323582       0.309404   -9999.000000       0.112000       0.095300       0.764000
56778     56778     yunnan         102.6500       25.0000          140       131     2012      06        10        162              0.292870      23.602325       3.501599       0.290812       0.226000   -9999.000000       0.102500       0.618000
56778     56778     yunnan         102.6500       25.0000          140       131     2012      06        11        163              0.000000      22.189270       4.997047       0.293591       0.221500       0.154300       0.098600       0.835000
56778     56778     yunnan         102.6500       25.0000          140       131     2012      06        12        164              0.294875      22.040375       6.880879       0.300911       0.209500   -9999.000000   -9999.000000   -9999.000000
56778     56778     yunnan         102.6500       25.0000          140       131     2012      06        13        165              0.293500      22.355438       0.000000       0.289119   -9999.000000       0.040500   -9999.000000       0.985000
56778     56778     yunnan         102.6500       25.0000          140       131     2012      06        14        166              0.292208      23.349091       3.741698       0.276223   -9999.000000       0.047400       0.092100   -9999.000000
56778     56778     yunnan         102.6500       25.0000          140       131     2012      06        15        167              0.290833      20.675293       0.479997       0.289102       0.172500   -9999.000000       0.091600       0.352000
56778     56778     yunnan         102.6500       25.0000          140       131     2012      06        16        168              0.289750      20.737976       1.232407       0.279939       0.205500       0.110900       0.094200       0.547000
56778     56778     yunnan         102.6500       25.0000          140       131     2012      06        17        169              0.289000      19.496765       0.000000       0.276622       0.188500   -9999.000000   -9999.000000   -9999.000000
56778     56778     yunnan         102.6500       25.0000          140       131     2012      06        18        170              0.288667      21.372101       0.528351       0.272676   -9999.000000   -9999.000000   -9999.000000       0.720000
56778     56778     yunnan         102.6500       25.0000          140       131     2012      06        19        171              0.296375      22.888367      30.134380       0.269449   -9999.000000       0.203600   -9999.000000   -9999.000000
56778     56778     yunnan         102.6500       25.0000          140       131     2012      06        20        172              0.299917      20.904205      11.067053       0.338972       0.207000   -9999.000000       0.074800       0.998000
56778     56778     yunnan         102.6500       25.0000          140       131     2012      06        21        173              0.299375      21.247986       0.985259       0.330648       0.236000   -9999.000000       0.076200       1.000000
56778     56778     yunnan         102.6500       25.0000          140       131     2012      06        22        174              0.298667      22.269012       6.762006       0.318940       0.237000       0.182900       0.071300       0.735000
56778     56778     yunnan         102.6500       25.0000          140       131     2012      06        23        175              0.298000      22.021271       8.246438       0.320131   -9999.000000   -9999.000000   -9999.000000       0.805000
56778     56778     yunnan         102.6500       25.0000          140       131     2012      06        24        176              0.297750      22.136078       0.225656       0.325449   -9999.000000       0.256200   -9999.000000   -9999.000000
56778     56778     yunnan         102.6500       25.0000          140       131     2012      06        25        177              0.297000      21.693909       0.136033       0.313824       0.246000   -9999.000000   -9999.000000       0.818000
56778     56778     yunnan         102.6500       25.0000          140       131     2012      06        26        178              0.296292      21.273315       0.321737       0.303796       0.244500       0.139200       0.108200   -9999.000000
56778     56778     yunnan         102.6500       25.0000          140       131     2012      06        27        179              0.295458      21.608154       0.073704       0.298595       0.224500       0.246700       0.098900       0.592000
56778     56778     yunnan         102.6500       25.0000          140       131     2012      06        28        180              0.294667      22.084778       0.000000       0.294111       0.224000   -9999.000000       0.098900       0.283000
56778     56778     yunnan         102.6500       25.0000          140       131     2012      06        29        181              0.293500      22.166107       0.239059       0.290591   -9999.000000       0.030200   -9999.000000   -9999.000000
56778     56778     yunnan         102.6500       25.0000          140       131     2012      06        30        182              0.292375      23.288116       0.193393       0.286574   -9999.000000   -9999.000000   -9999.000000   -9999.000000
56778     56778     yunnan         102.6500       25.0000          140       131     2012      07        01        183              0.295542      23.621674       3.834325       0.283203       0.167000       0.060200       0.100400   -9999.000000
56778     56778     yunnan         102.6500       25.0000          140       131     2012      07        02        184              0.297875      23.474518       1.192356       0.291932       0.149500       0.089100       0.117500       0.513000
56778     56778     yunnan         102.6500       25.0000          140       131     2012      07        03        185              0.297000      23.102417       0.646632       0.289997       0.150000   -9999.000000       0.126100       0.734000
56778     56778     yunnan         102.6500       25.0000          140       131     2012      07        04        186              0.297526      22.414307       8.887380       0.283733   -9999.000000       0.200200   -9999.000000       0.545000
56778     56778     yunnan         102.6500       25.0000          140       131     2012      07        05        187              0.299583      21.247681       8.936454       0.308530   -9999.000000   -9999.000000   -9999.000000       0.684000
56778     56778     yunnan         102.6500       25.0000          140       131     2012      07        06        188              0.298625      21.219360       0.098089       0.320293   -9999.000000   -9999.000000   -9999.000000   -9999.000000
56778     56778     yunnan         102.6500       25.0000          140       131     2012      07        07        189              0.297583      22.659485       0.198073       0.302078   -9999.000000       0.211000       0.122100       0.466000
56778     56778     yunnan         102.6500       25.0000          140       131     2012      07        08        190              0.297000      23.274902       0.347618       0.293488       0.149500   -9999.000000       0.114300       0.514000
56778     56778     yunnan         102.6500       25.0000          140       131     2012      07        09        191              0.295917      23.338959       0.000000       0.288758   -9999.000000   -9999.000000       0.080200       0.284000
56778     56778     yunnan         102.6500       25.0000          140       131     2012      07        10        192              0.294583      23.167847       0.562023       0.283240   -9999.000000   -9999.000000   -9999.000000       0.568000
56778     56778     yunnan         102.6500       25.0000          140       131     2012      07        11        193              0.293500      23.412537       0.000000       0.280181       0.208000   -9999.000000   -9999.000000   -9999.000000
56778     56778     yunnan         102.6500       25.0000          140       131     2012      07        12        194              0.292375      23.589508       0.000000       0.275934       0.205000       0.067900   -9999.000000       0.697000
56778     56778     yunnan         102.6500       25.0000          140       131     2012      07        13        195              0.297875      23.435822      44.145805       0.271746       0.344000   -9999.000000       0.092500   -9999.000000
56778     56778     yunnan         102.6500       25.0000          140       131     2012      07        14        196              0.301375      21.859680       3.526295       0.339548       0.261000   -9999.000000       0.086100       0.893000
56778     56778     yunnan         102.6500       25.0000          140       131     2012      07        15        197              0.299542      21.772949       0.189648       0.337308   -9999.000000       0.189700       0.102500       0.719000
56778     56778     yunnan         102.6500       25.0000          140       131     2012      07        16        198              0.299917      21.678528      10.831311       0.318317   -9999.000000   -9999.000000   -9999.000000       0.905000
56778     56778     yunnan         102.6500       25.0000          140       131     2012      07        17        199              0.300917      20.913361       8.464599       0.329866       0.270000       0.126200   -9999.000000       1.000000
56778     56778     yunnan         102.6500       25.0000          140       131     2012      07        18        200              0.301045      20.961090       5.602192       0.334782       0.261000   -9999.000000       0.105100   -9999.000000
56778     56778     yunnan         102.6500       25.0000          140       131     2012      07        19        201              0.301292      21.075073       8.031836       0.328691       0.266000       0.070600       0.114000       1.000000
56778     56778     yunnan         102.6500       25.0000          140       131     2012      07        20        202              0.300375      21.416168       0.054715       0.334326   -9999.000000       0.275000       0.109400       0.889000
56778     56778     yunnan         102.6500       25.0000          140       131     2012      07        21        203              0.299348      22.515900       0.000000       0.318862   -9999.000000   -9999.000000   -9999.000000       0.371000
56778     56778     yunnan         102.6500       25.0000          140       131     2012      07        22        204              0.299375      22.631927      16.970835       0.310148       0.272500       0.138000   -9999.000000       0.692000
56778     56778     yunnan         102.6500       25.0000          140       131     2012      07        23        205              0.301125      21.443115       7.355545       0.328969       0.285500   -9999.000000   -9999.000000   -9999.000000
56778     56778     yunnan         102.6500       25.0000          140       131     2012      07        24        206              0.300250      21.912109       0.557952       0.334855       0.270500   -9999.000000       0.086400       0.699000
56778     56778     yunnan         102.6500       25.0000          140       131     2012      07        25        207              0.299167      22.211487       0.965145       0.320575       0.290000       0.191900       0.089300   -9999.000000
56778     56778     yunnan         102.6500       25.0000          140       131     2012      07        26        208              0.298208      20.999451       1.878794       0.315226   -9999.000000   -9999.000000       0.088200       0.780000
56778     56778     yunnan         102.6500       25.0000          140       131     2012      07        27        209              0.298875      21.983429      10.382362       0.312271       0.264000       0.119300   -9999.000000       0.840000
56778     56778     yunnan         102.6500       25.0000          140       131     2012      07        28        210              0.301417      21.967133      21.658009       0.317309       0.304000   -9999.000000   -9999.000000   -9999.000000
56778     56778     yunnan         102.6500       25.0000          140       131     2012      07        29        211              0.300304      20.170654       1.347562       0.352926       0.275500   -9999.000000   -9999.000000       1.000000
56778     56778     yunnan         102.6500       25.0000          140       131     2012      07        30        212              0.299208      21.307159       3.150237       0.328855       0.277000       0.272100       0.102300   -9999.000000
56778     56778     yunnan         102.6500       25.0000          140       131     2012      07        31        213              0.298542      23.197845      10.319269       0.321564   -9999.000000   -9999.000000       0.100300       0.968000
56778     56778     yunnan         102.6500       25.0000          140       131     2012      08        01        214              0.299000      22.319458       2.968642       0.330731   -9999.000000       0.156900   -9999.000000       0.954000
56778     56778     yunnan         102.6500       25.0000          140       131     2012      08        02        215              0.298625      21.440155       8.495182       0.327993       0.321000       0.174600   -9999.000000       0.531000
56778     56778     yunnan         102.6500       25.0000          140       131     2012      08        03        216              0.299292      21.852539      10.390800       0.331518       0.293000   -9999.000000   -9999.000000       0.777000
56778     56778     yunnan         102.6500       25.0000          140       131     2012      08        04        217              0.298958      22.396332       7.796819       0.331744       0.341500       0.169000       0.103800   -9999.000000
56778     56778     yunnan         102.6500       25.0000          140       131     2012      08        05        218              0.299708      23.412292       7.761556       0.336506   -9999.000000   -9999.000000       0.117300       0.993000
56778     56778     yunnan         102.6500       25.0000          140       131     2012      08        06        219              0.301083      23.834503      26.544767       0.332632   -9999.000000       0.122100       0.083800       0.740000
56778     56778     yunnan         102.6500       25.0000          140       131     2012      08        07        220              0.300375      22.011414       0.608368       0.355371       0.359000       0.289500   -9999.000000       0.669000
56778     56778     yunnan         102.6500       25.0000          140       131     2012      08        08        221              0.298917      21.644592       0.070096       0.334235       0.346500   -9999.000000   -9999.000000       0.886000
56778     56778     yunnan         102.6500       25.0000          140       131     2012      08        09        222              0.298000      22.782013       4.045701       0.319250       0.343500       0.179700   -9999.000000   -9999.000000
56778     56778     yunnan         102.6500       25.0000          140       131     2012      08        10        223              0.297792      22.437714       0.195563       0.320731       0.290000   -9999.000000       0.075400       0.708000
56778     56778     yunnan         102.6500       25.0000          140       131     2012      08        11        224              0.296625      22.873322       0.000000       0.310860   -9999.000000   -9999.000000       0.073400   -9999.000000
56778     56778     yunnan         102.6500       25.0000          140       131     2012      08        12        225              0.295375      23.660095       1.506052       0.303604   -9999.000000       0.140000       0.073400       0.390000
56778     56778     yunnan         102.6500       25.0000          140       131     2012      08        13        226              0.297792      24.253174       6.518258       0.300423       0.300000   -9999.000000   -9999.000000       0.718000
56778     56778     yunnan         102.6500       25.0000          140       131     2012      08        14        227              0.297625      22.691406       0.306492       0.315650       0.268500       0.045600   -9999.000000   -9999.000000
56778     56778     yunnan         102.6500       25.0000          140       131     2012      08        15        228              0.299542      23.235962      11.158702       0.305881       0.303000   -9999.000000       0.100500       1.000000
56778     56778     yunnan         102.6500       25.0000          140       131     2012      08        16        229              0.298792      22.751770       0.000000       0.325294   -9999.000000   -9999.000000       0.104100   -9999.000000
56778     56778     yunnan         102.6500       25.0000          140       131     2012      08        17        230              0.297375      23.366882       0.126130       0.313091   -9999.000000   -9999.000000       0.098700       0.643000
56778     56778     yunnan         102.6500       25.0000          140       131     2012      08        18        231              0.297000      23.924194       4.679668       0.303224       0.271000   -9999.000000   -9999.000000       0.801000
56778     56778     yunnan         102.6500       25.0000          140       131     2012      08        19        232              0.296917      20.622620       1.570319       0.308025       0.270500       0.039900   -9999.000000       0.730000
56778     56778     yunnan         102.6500       25.0000          140       131     2012      08        20        233              0.295875      21.206177       1.856676       0.311917       0.234000       0.057800   -9999.000000       0.580000
56778     56778     yunnan         102.6500       25.0000          140       131     2012      08        21        234              0.295125      22.468140       1.032709       0.305692       0.262000   -9999.000000       0.115900   -9999.000000
56778     56778     yunnan         102.6500       25.0000          140       131     2012      08        22        235              0.294292      22.064636       1.105047       0.303789   -9999.000000       0.143700       0.125000   -9999.000000
56778     56778     yunnan         102.6500       25.0000          140       131     2012      08        23        236              0.293417      21.296570       9.240962       0.299180   -9999.000000   -9999.000000       0.126500   -9999.000000
56778     56778     yunnan         102.6500       25.0000          140       131     2012      08        24        237              0.293000      21.188629       0.000000       0.310768       0.210000       0.090500   -9999.000000   -9999.000000
56778     56778     yunnan         102.6500       25.0000          140       131     2012      08        25        238              0.000000      20.518524      31.359993       0.313180       0.282500   -9999.000000   -9999.000000   -9999.000000
56778     56778     yunnan         102.6500       25.0000          140       131     2012      08        26        239              0.299250      22.042511       2.441451       0.333730       0.299500   -9999.000000   -9999.000000   -9999.000000
56778     56778     yunnan         102.6500       25.0000          140       131     2012      08        27        240              0.298250      20.908752       1.039575       0.339612   -9999.000000       0.085000       0.077600       0.786000
56778     56778     yunnan         102.6500       25.0000          140       131     2012      08        28        241              0.297750      21.761810       0.075493       0.322552   -9999.000000   -9999.000000       0.075400   -9999.000000
56778     56778     yunnan         102.6500       25.0000          140       131     2012      08        29        242              0.297000      22.284454       0.112271       0.313129       0.228000       0.096800       0.074400       0.699000
56778     56778     yunnan         102.6500       25.0000          140       131     2012      08        30        243              0.296208      22.499878       0.200247       0.306932       0.258000       0.165800   -9999.000000       0.588000
56778     56778     yunnan         102.6500       25.0000          140       131     2012      08        31        244              0.295083      22.821167       0.000000       0.302656       0.272000   -9999.000000   -9999.000000       0.363000
56778     56778     yunnan         102.6500       25.0000          140       131     2012      09        01        245              0.294042      22.877838       9.310078       0.299322   -9999.000000       0.056400       0.078000       0.588000
56778     56778     yunnan         102.6500       25.0000          140       131     2012      09        02        246              0.297833      22.725861      17.151470       0.306160   -9999.000000   -9999.000000       0.085600   -9999.000000
56778     56778     yunnan         102.6500       25.0000          140       131     2012      09        03        247              0.297333      19.086212       0.065703       0.341559       0.313000   -9999.000000       0.161000       0.253000
56778     56778     yunnan         102.6500       25.0000          140       131     2012      09        04        248              0.296250      20.921112       0.000000       0.316175       0.297000       0.149800   -9999.000000       0.827000
56778     56778     yunnan         102.6500       25.0000          140       131     2012      09        05        249              0.294500      21.068146       0.069325       0.308774       0.315000   -9999.000000   -9999.000000       0.450000
56778     56778     yunnan         102.6500       25.0000          140       131     2012      09        06        250              0.293500      21.405609       0.288146       0.304244       0.274000   -9999.000000   -9999.000000       0.691000
56778     56778     yunnan         102.6500       25.0000          140       131     2012      09        07        251              0.293000      21.338715       0.242722       0.300923   -9999.000000       0.148300       0.146300   -9999.000000
56778     56778     yunnan         102.6500       25.0000          140       131     2012      09        08        252              0.292583      21.046112       0.000000       0.299251   -9999.000000   -9999.000000       0.145200       0.482000
56778     56778     yunnan         102.6500       25.0000          140       131     2012      09        09        253              0.291625      21.510406       2.005903       0.296896       0.204000       0.051100       0.144200   -9999.000000
56778     56778     yunnan         102.6500       25.0000          140       131     2012      09        10        254              0.290708      22.773895       0.207790       0.296881       0.308500   -9999.000000   -9999.000000       0.344000
56778     56778     yunnan         102.6500       25.0000          140       131     2012      09        11        255              0.290000      22.247284      16.201260       0.296824       0.244000       0.046600   -9999.000000       0.486000
56778     56778     yunnan         102.6500       25.0000          140       131     2012      09        12        256              0.296333      20.726471      51.688381       0.312946   -9999.000000       0.316200   -9999.000000   -9999.000000
56778     56778     yunnan         102.6500       25.0000          140       131     2012      09        13        257              0.298417      17.965912      12.867608       0.371343   -9999.000000   -9999.000000       0.093900       1.000000
56778     56778     yunnan         102.6500       25.0000          140       131     2012      09        14        258              0.298000      16.303192       0.081479       0.350630       0.241000       0.235600       0.089800   -9999.000000
56778     56778     yunnan         102.6500       25.0000          140       131     2012      09        15        259              0.297000      16.535522       0.039511       0.333664       0.295500   -9999.000000       0.100300       0.499000
56778     56778     yunnan         102.6500       25.0000          140       131     2012      09        16        260              0.297000      16.929169       0.101704       0.323853       0.306000       0.167700   -9999.000000       0.617000
56778     56778     yunnan         102.6500       25.0000          140       131     2012      09        17        261              0.296458      18.165894       0.275680       0.320007       0.291000       0.377700   -9999.000000       0.790000
56778     56778     yunnan         102.6500       25.0000          140       131     2012      09        18        262              0.296000      18.324646       2.456378       0.318792   -9999.000000   -9999.000000       0.153700       0.690000
56778     56778     yunnan         102.6500       25.0000          140       131     2012      09        19        263              0.296000      18.973816       6.002378       0.318996   -9999.000000       0.109700       0.147600   -9999.000000
56778     56778     yunnan         102.6500       25.0000          140       131     2012      09        20        264              0.296000      17.418579       0.000000       0.329563       0.241000   -9999.000000       0.129500       1.000000
56778     56778     yunnan         102.6500       25.0000          140       131     2012      09        21        265              0.295375      19.164856       0.372605       0.321528   -9999.000000   -9999.000000   -9999.000000   -9999.000000
56778     56778     yunnan         102.6500       25.0000          140       131     2012      09        22        266              0.294708      19.204407       0.000000       0.317014       0.201500       0.126700   -9999.000000       0.646000
56778     56778     yunnan         102.6500       25.0000          140       131     2012      09        23        267              0.293625      19.839905       0.054220       0.314108   -9999.000000   -9999.000000   -9999.000000       0.555000
56778     56778     yunnan         102.6500       25.0000          140       131     2012      09        24        268              0.292417      20.886078       0.825795       0.311361   -9999.000000       0.058500       0.058600   -9999.000000
56778     56778     yunnan         102.6500       25.0000          140       131     2012      09        25        269              0.295250      21.593811       5.872736       0.309088       0.202000       0.148900       0.060700       0.800000
56778     56778     yunnan         102.6500       25.0000          140       131     2012      09        26        270              0.297292      20.622559      29.873569       0.318384       0.193500   -9999.000000       0.061200   -9999.000000
56778     56778     yunnan         102.6500       25.0000          140       131     2012      09        27        271              0.299786      20.727539      18.589117       0.340804       0.250000       0.227200   -9999.000000       0.835000
56778     56778     yunnan         102.6500       25.0000          140       131     2012      09        28        272              0.298267      19.184540       1.067989       0.356523   -9999.000000   -9999.000000   -9999.000000       0.937000
56778     56778     yunnan         102.6500       25.0000          140       131     2012      09        29        273              0.298000      17.594818       0.844858       0.334636   -9999.000000       0.256900   -9999.000000       0.636000
56778     56778     yunnan         102.6500       25.0000          140       131     2012      09        30        274              0.298000      18.207977       1.813444       0.329020       0.218000   -9999.000000       0.067800       0.793000
56778     56778     yunnan         102.6500       25.0000          140       131     2012      10        01        275              0.298458      17.217560       1.688063       0.326451       0.219500   -9999.000000       0.060300   -9999.000000
56778     56778     yunnan         102.6500       25.0000          140       131     2012      10        02        276              0.298417      17.275909       0.116815       0.326945       0.214000       0.162600   -9999.000000       0.636000
56778     56778     yunnan         102.6500       25.0000          140       131     2012      10        03        277              0.298000      18.101349       0.698437       0.324092       0.210000   -9999.000000   -9999.000000       0.628000
56778     56778     yunnan         102.6500       25.0000          140       131     2012      10        04        278              0.297792      18.167419       0.378057       0.321902   -9999.000000       0.243300   -9999.000000       0.683000
56778     56778     yunnan         102.6500       25.0000          140       131     2012      10        05        279              0.299042      19.131531       6.655975       0.319653   -9999.000000   -9999.000000       0.067700       0.952000
56778     56778     yunnan         102.6500       25.0000          140       131     2012      10        06        280              0.300750      19.077026       6.219120       0.327289       0.220000   -9999.000000       0.064500   -9999.000000
56778     56778     yunnan         102.6500       25.0000          140       131     2012      10        07        281              0.299792      17.637268       0.131779       0.333387       0.236000       0.124100       0.054600       1.000000
56778     56778     yunnan         102.6500       25.0000          140       131     2012      10        08        282              0.299000      18.390564       0.368479       0.325883       0.220500   -9999.000000   -9999.000000   -9999.000000
56778     56778     yunnan         102.6500       25.0000          140       131     2012      10        09        283              0.298333      18.614929       0.055295       0.320211   -9999.000000   -9999.000000   -9999.000000       0.557000
56778     56778     yunnan         102.6500       25.0000          140       131     2012      10        10        284              0.298000      18.193573       0.000000       0.317864   -9999.000000       0.294600   -9999.000000       0.484000
56778     56778     yunnan         102.6500       25.0000          140       131     2012      10        11        285              0.297250      17.772247       0.000000       0.316583       0.307000   -9999.000000       0.092100   -9999.000000
56778     56778     yunnan         102.6500       25.0000          140       131     2012      10        12        286              0.296542      18.630005       0.282595       0.313985       0.306500       0.162500       0.091600       0.815000
56778     56778     yunnan         102.6500       25.0000          140       131     2012      10        13        287              0.295625      18.278992       0.127773       0.314018       0.298000       0.207300       0.088100   -9999.000000
56778     56778     yunnan         102.6500       25.0000          140       131     2012      10        14        288              0.294375      18.973907       0.397993       0.312085       0.262000   -9999.000000   -9999.000000       1.000000
56778     56778     yunnan         102.6500       25.0000          140       131     2012      10        15        289              0.292917      19.292999       0.000000       0.308767   -9999.000000       0.029400   -9999.000000       0.536000
56778     56778     yunnan         102.6500       25.0000          140       131     2012      10        16        290              0.291542      19.170990       0.146596       0.306380   -9999.000000   -9999.000000       0.171900       0.260000
56778     56778     yunnan         102.6500       25.0000          140       131     2012      10        17        291              0.291000      19.326111       0.000000       0.304636       0.266500   -9999.000000       0.174400       0.588000
56778     56778     yunnan         102.6500       25.0000          140       131     2012      10        18        292              0.290417      16.137756       0.000000       0.304899       0.272000       0.084700       0.172200   -9999.000000
56778     56778     yunnan         102.6500       25.0000          140       131     2012      10        19        293              0.289458      17.456726       0.000000       0.302589       0.227000   -9999.000000   -9999.000000       0.863000
56778     56778     yunnan         102.6500       25.0000          140       131     2012      10        20        294              0.288583      17.900269       0.000000       0.300036   -9999.000000   -9999.000000   -9999.000000   -9999.000000
56778     56778     yunnan         102.6500       25.0000          140       131     2012      10        21        295              0.288167      17.452881       0.438942       0.297776   -9999.000000   -9999.000000   -9999.000000       0.077000
56778     56778     yunnan         102.6500       25.0000          140       131     2012      10        22        296              0.287708      17.102997       0.237181       0.296197   -9999.000000       0.067800       0.155100       0.374000
56778     56778     yunnan         102.6500       25.0000          140       131     2012      10        23        297              0.286542      17.155365       0.256698       0.295821   -9999.000000   -9999.000000       0.169600   -9999.000000
56778     56778     yunnan         102.6500       25.0000          140       131     2012      10        24        298              0.286000      16.645020       0.000000       0.294422   -9999.000000   -9999.000000       0.158200       0.304000
56778     56778     yunnan         102.6500       25.0000          140       131     2012      10        25        299              0.000000      16.997650       0.000000       0.292573   -9999.000000       0.013800   -9999.000000   -9999.000000
56778     56778     yunnan         102.6500       25.0000          140       131     2012      10        26        300              0.285125      16.852051       4.353863       0.290862   -9999.000000   -9999.000000   -9999.000000       0.274000
56778     56778     yunnan         102.6500       25.0000          140       131     2012      10        27        301              0.285000      16.719971       0.318814       0.289516       0.306000   -9999.000000   -9999.000000       0.459000
56778     56778     yunnan         102.6500       25.0000          140       131     2012      10        28        302              0.000000      16.948181       0.000000       0.289584       0.312000       0.039100       0.166000       0.255000
56778     56778     yunnan         102.6500       25.0000          140       131     2012      10        29        303              0.285000      17.647217       2.771847       0.289441       0.327000   -9999.000000       0.165300       0.539000
56778     56778     yunnan         102.6500       25.0000          140       131     2012      10        30        304              0.284667      18.188141       2.093038       0.289142       0.410000       0.055500       0.165700   -9999.000000
56778     56778     yunnan         102.6500       25.0000          140       131     2012      10        31        305              0.284250      14.420166       0.362979       0.297307   -9999.000000       0.088300   -9999.000000       0.574000
56778     56778     yunnan         102.6500       25.0000          140       131     2012      11        01        306              0.284000      14.661804       0.000000       0.294228   -9999.000000   -9999.000000   -9999.000000       0.435000
56778     56778     yunnan         102.6500       25.0000          140       131     2012      11        02        307              0.284000      15.040283       0.000000       0.292555       0.311500       0.009800       0.161100       0.217000
56778     56778     yunnan         102.6500       25.0000          140       131     2012      11        03        308              0.283167      14.961395       0.182518       0.290345       0.355000   -9999.000000       0.173100       0.470000
56778     56778     yunnan         102.6500       25.0000          140       131     2012      11        04        309              0.283000      15.740082       0.225981       0.290051       0.366000   -9999.000000       0.179100   -9999.000000
56778     56778     yunnan         102.6500       25.0000          140       131     2012      11        05        310              0.283000      15.131134       0.116178       0.290483   -9999.000000   -9999.000000   -9999.000000       0.840000
56778     56778     yunnan         102.6500       25.0000          140       131     2012      11        06        311              0.283000      15.882782       0.112156       0.289988   -9999.000000   -9999.000000   -9999.000000   -9999.000000
56778     56778     yunnan         102.6500       25.0000          140       131     2012      11        07        312              0.283000      15.957367       0.618821       0.290961       0.366000       0.061400   -9999.000000       0.382000
56778     56778     yunnan         102.6500       25.0000          140       131     2012      11        08        313              0.283000      15.866272       0.062956       0.293233       0.358000   -9999.000000       0.143700       0.667000
56778     56778     yunnan         102.6500       25.0000          140       131     2012      11        09        314              0.283000      14.975800       0.000000       0.291586       0.280000   -9999.000000       0.154100   -9999.000000
56778     56778     yunnan         102.6500       25.0000          140       131     2012      11        10        315              0.283000      15.028290       0.000000       0.288728       0.315000       0.068000       0.148800       0.680000
56778     56778     yunnan         102.6500       25.0000          140       131     2012      11        11        316              0.283000      15.031464       0.000000       0.287658   -9999.000000   -9999.000000   -9999.000000   -9999.000000
56778     56778     yunnan         102.6500       25.0000          140       131     2012      11        12        317              0.283000      14.141693       0.000000       0.287929   -9999.000000       0.076600   -9999.000000       0.916000
56778     56778     yunnan         102.6500       25.0000          140       131     2012      11        13        318              0.000000      14.654480       0.576413       0.287232       0.318000   -9999.000000   -9999.000000       0.459000
56778     56778     yunnan         102.6500       25.0000          140       131     2012      11        14        319              0.282417      15.141785       0.166128       0.285807       0.366000   -9999.000000       0.161500       0.194000
56778     56778     yunnan         102.6500       25.0000          140       131     2012      11        15        320              0.282500      15.128204       3.523243       0.285383       0.364000       0.095500       0.167600       0.384000
56778     56778     yunnan         102.6500       25.0000          140       131     2012      11        16        321              0.289750      15.629883       5.869853       0.289455   -9999.000000   -9999.000000   -9999.000000   -9999.000000
56778     56778     yunnan         102.6500       25.0000          140       131     2012      11        17        322              0.000000      14.077820       0.066949       0.314646   -9999.000000   -9999.000000   -9999.000000       0.586000
56778     56778     yunnan         102.6500       25.0000          140       131     2012      11        18        323              0.288708      13.895752       0.772024       0.300305       0.331000   -9999.000000   -9999.000000   -9999.000000
56778     56778     yunnan         102.6500       25.0000          140       131     2012      11        19        324              0.287625      14.016235      11.785478       0.296405       0.362000   -9999.000000       0.167200       0.369000
56778     56778     yunnan         102.6500       25.0000          140       131     2012      11        20        325              0.286625      15.102081       0.950072       0.293146       0.371500       0.038200       0.181300       0.587000
56778     56778     yunnan         102.6500       25.0000          140       131     2012      11        21        326              0.285708      15.541321       0.059499       0.290459   -9999.000000   -9999.000000       0.167500   -9999.000000
56778     56778     yunnan         102.6500       25.0000          140       131     2012      11        22        327              0.285000      15.322571       0.000000       0.288215   -9999.000000   -9999.000000   -9999.000000       0.321000
56778     56778     yunnan         102.6500       25.0000          140       131     2012      11        23        328              0.284417      14.561707       0.000000       0.286377       0.373000       0.022300   -9999.000000   -9999.000000
56778     56778     yunnan         102.6500       25.0000          140       131     2012      11        24        329              0.284000      14.329193       0.000000       0.285805       0.361500   -9999.000000   -9999.000000       0.480000
56778     56778     yunnan         102.6500       25.0000          140       131     2012      11        25        330              0.283583      14.289703       0.000000       0.284734       0.340000       0.059400       0.175900       0.341000
56778     56778     yunnan         102.6500       25.0000          140       131     2012      11        26        331              0.283000      14.139038       0.000000       0.283889       0.371000   -9999.000000   -9999.000000       0.078000
56778     56778     yunnan         102.6500       25.0000          140       131     2012      11        27        332              0.283000      13.955505       0.000000       0.284119   -9999.000000   -9999.000000       0.164200       0.279000
56778     56778     yunnan         102.6500       25.0000          140       131     2012      11        28        333              0.283000      13.468933       0.000000       0.283594   -9999.000000       0.121200   -9999.000000   -9999.000000
56778     56778     yunnan         102.6500       25.0000          140       131     2012      11        29        334              0.282667      13.446686       0.438417       0.282598       0.333500   -9999.000000   -9999.000000       0.568000
56778     56778     yunnan         102.6500       25.0000          140       131     2012      11        30        335              0.282125      12.971619       0.087979       0.281689       0.379500   -9999.000000       0.158300       0.329000
56778     56778     yunnan         102.6500       25.0000          140       131     2012      12        01        336              0.282000      13.257202       0.000000       0.281467       0.298000   -9999.000000       0.169900       0.190000
56778     56778     yunnan         102.6500       25.0000          140       131     2012      12        02        337              0.282000      13.452972       0.176864       0.281032   -9999.000000   -9999.000000       0.160500       0.392000
56778     56778     yunnan         102.6500       25.0000          140       131     2012      12        03        338              0.282000      13.286865       0.320812       0.280611   -9999.000000       0.028900   -9999.000000   -9999.000000
56778     56778     yunnan         102.6500       25.0000          140       131     2012      12        04        339              0.282000      13.032806       0.153822       0.279623       0.365000   -9999.000000   -9999.000000       0.931000
56778     56778     yunnan         102.6500       25.0000          140       131     2012      12        05        340              0.282000      12.740112       0.098750       0.278881       0.356500       0.104400   -9999.000000   -9999.000000
56778     56778     yunnan         102.6500       25.0000          140       131     2012      12        06        341              0.282000       9.840668       0.000000       0.281345       0.318000   -9999.000000       0.169200       0.378000
56778     56778     yunnan         102.6500       25.0000          140       131     2012      12        07        342              0.282000      11.597565       4.933788       0.281260   -9999.000000   -9999.000000       0.157700       0.288000
56778     56778     yunnan         102.6500       25.0000          140       131     2012      12        08        343              0.282000      10.635498       0.000000       0.282909   -9999.000000       0.082100       0.160600       0.151000
56778     56778     yunnan         102.6500       25.0000          140       131     2012      12        09        344              0.282000      10.831238       5.964337       0.283609   -9999.000000   -9999.000000   -9999.000000       0.190000
56778     56778     yunnan         102.6500       25.0000          140       131     2012      12        10        345              0.281875      11.717163       1.370930       0.282861       0.267000   -9999.000000   -9999.000000   -9999.000000
56778     56778     yunnan         102.6500       25.0000          140       131     2012      12        11        346              0.281542      11.822052       0.874666       0.281396       0.296000       0.040600   -9999.000000       0.403000
56778     56778     yunnan         102.6500       25.0000          140       131     2012      12        12        347              0.281417      11.223755       0.070645       0.281340       0.287000   -9999.000000       0.173100       0.024000
56778     56778     yunnan         102.6500       25.0000          140       131     2012      12        13        348              0.281333      11.590729       0.000000       0.280647   -9999.000000   -9999.000000       0.172900       0.329000
56778     56778     yunnan         102.6500       25.0000          140       131     2012      12        14        349              0.281125      11.709900       0.000000       0.279483   -9999.000000   -9999.000000       0.172300       0.426000
56778     56778     yunnan         102.6500       25.0000          140       131     2012      12        15        350              0.000000      11.465424       0.129869       0.278278       0.234000       0.046700   -9999.000000   -9999.000000
56778     56778     yunnan         102.6500       25.0000          140       131     2012      12        16        351              0.281000      11.138550       0.000000       0.277053       0.312000   -9999.000000   -9999.000000       0.203000
56778     56778     yunnan         102.6500       25.0000          140       131     2012      12        17        352              0.281000      11.306122       0.953179       0.276194       0.267000   -9999.000000       0.147600   -9999.000000
56778     56778     yunnan         102.6500       25.0000          140       131     2012      12        18        353              0.281000      11.431732       2.474813       0.275378   -9999.000000       0.057900       0.154100       0.685000
56778     56778     yunnan         102.6500       25.0000          140       131     2012      12        19        354              0.281000       9.816376       0.000000       0.279021   -9999.000000   -9999.000000       0.162600       0.291000
56778     56778     yunnan         102.6500       25.0000          140       131     2012      12        20        355              0.000000      11.667664       0.289256       0.277612       0.303000   -9999.000000   -9999.000000   -9999.000000
56778     56778     yunnan         102.6500       25.0000          140       131     2012      12        21        356              0.281000      11.545715       0.399352       0.276562       0.338000       0.056400   -9999.000000       0.264000
56778     56778     yunnan         102.6500       25.0000          140       131     2012      12        22        357              0.281000      11.214264       0.000000       0.275669       0.437000   -9999.000000   -9999.000000   -9999.000000
56778     56778     yunnan         102.6500       25.0000          140       131     2012      12        23        358              0.281000      11.095215       1.369672       0.275327   -9999.000000   -9999.000000       0.146800       0.897000
56778     56778     yunnan         102.6500       25.0000          140       131     2012      12        24        359              0.281000       7.216461      18.660889       0.277437   -9999.000000   -9999.000000       0.167600       0.172000
56778     56778     yunnan         102.6500       25.0000          140       131     2012      12        25        360              0.281000      10.012299       0.120475       0.276815   -9999.000000   -9999.000000       0.160100       0.182000
56778     56778     yunnan         102.6500       25.0000          140       131     2012      12        26        361              0.000000      10.704651       0.118729       0.275522       0.278000       0.040400   -9999.000000       0.409000
56778     56778     yunnan         102.6500       25.0000          140       131     2012      12        27        362              0.281000      10.556854       0.224322       0.274686       0.374000   -9999.000000   -9999.000000   -9999.000000
56778     56778     yunnan         102.6500       25.0000          140       131     2012      12        28        363              0.000000      10.239319       0.000000       0.273288   -9999.000000   -9999.000000   -9999.000000       0.477000
56778     56778     yunnan         102.6500       25.0000          140       131     2012      12        29        364              0.000000      10.628540       0.147566       0.272623   -9999.000000       0.094500       0.176800       0.576000
56778     56778     yunnan         102.6500       25.0000          140       131     2012      12        30        365              0.000000       9.261383       0.000000       0.271746   -9999.000000   -9999.000000       0.182500       0.242000
56778     56778     yunnan         102.6500       25.0000          140       131     2012      12        31        366              0.281000       2.968658       0.000000       0.273075       0.443000   -9999.000000       0.188700       0.423000
